# Supplementary material for: Targeting serine hydroxymethyltransferases 1 and 2 for T-cell acute lymphoblastic leukemia therapy
Source: PubMed Central journal article supplement (PMC8807390; doi:10.1038/s41375-021-01361-8), 2021-08-02
Supplement: 41375_2021_1361_MOESM5_ESM.pdf [file 41375_2021_1361_MOESM5_ESM.pdf]

■ normalized cell counts  
■ normalized luminescence

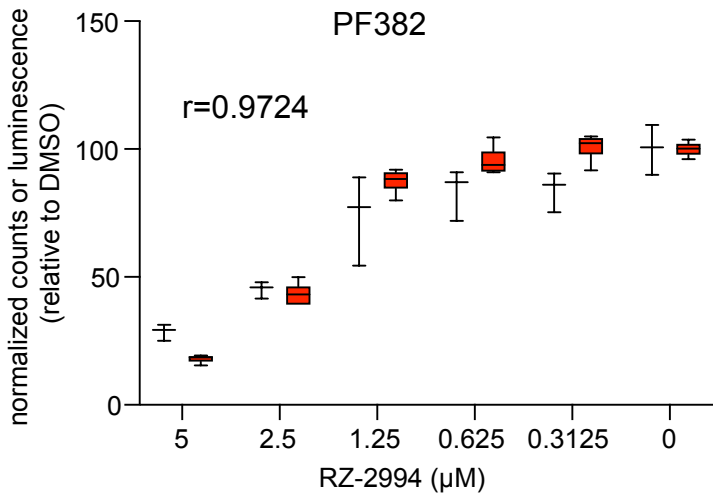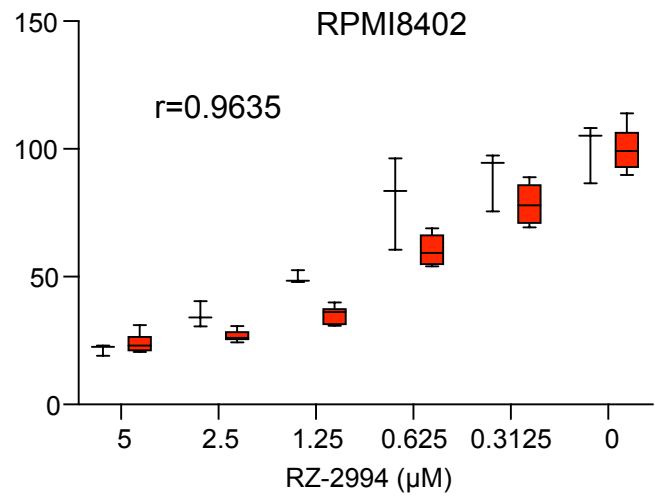

**Supplementary Fig. 5**
