# Supplementary material for: Targeting serine hydroxymethyltransferases 1 and 2 for T-cell acute lymphoblastic leukemia therapy
Source: PubMed Central journal article supplement (PMC8807390; doi:10.1038/s41375-021-01361-8), 2021-08-02
Supplement: 41375_2021_1361_MOESM22_ESM.pdf [file 41375_2021_1361_MOESM22_ESM.pdf]

**Supplemental Table 3A:** List of ranked KEGG pathways as shown in the heatmap of GSE33315 data in Figure 1D. ONE CARBON POOL BY FOLATE, PURINE and PYRIMIDINE pathways are highlighted red.

| Rank heatmap<br>GSE33315 | KEGG pathway                                              |
|--------------------------|-----------------------------------------------------------|
| 1                        | KEGG_GLYCOLYSIS_GLUONEOGENESIS                            |
| 2                        | KEGG_PENTOSE_PHOSPHATE_PATHWAY                            |
| 3                        | KEGG_FRUCTOSE_AND_MANNOSE_METABOLISM                      |
| 4                        | KEGG_GALACTOSE_METABOLISM                                 |
| 5                        | KEGG_AMINO_SUGAR_AND_NUCLEOTIDE_SUGAR_METABOLISM          |
| 6                        | KEGG_ALANINE_ASPARTATE_AND_Glutamate_METABOLISM           |
| 7                        | KEGG_ARGININE_AND_PROLINE_METABOLISM                      |
| 8                        | KEGG_Glutathione_METABOLISM                               |
| 9                        | KEGG_FATTY_ACID_METABOLISM                                |
| 10                       | KEGG_BUTANOATE_METABOLISM                                 |
| 11                       | KEGG_VALINE_LEUCINE_AND_ISOLEUCINE_DEGRADATION            |
| 12                       | KEGG_PROPANOATE_METABOLISM                                |
| 13                       | KEGG_LYSINE_DEGRADATION                                   |
| 14                       | KEGG_BETA_ALANINE_METABOLISM                              |
| 15                       | KEGG_LIMONENE_AND_PINENE_DEGRADATION                      |
| 16                       | KEGG_NICOTINATE_AND_NICOTINAMIDE_METABOLISM               |
| 17                       | KEGG_PANTOTHENATE_AND_COA_BIOSYNTHESIS                    |
| 18                       | KEGG_STEROID_BIOSYNTHESIS                                 |
| 19                       | KEGG_TERPENOID_BACKBONE_BIOSYNTHESIS                      |
| 20                       | KEGG_BIOSYNTHESIS_OF_UNSATURATED_FATTY_ACIDS              |
| 21                       | KEGG_VALINE_LEUCINE_AND_ISOLEUCINE_BIOSYNTHESIS           |
| 22                       | KEGG_CITRATE_CYCLE_TCA_CYCLE                              |
| 23                       | KEGG_PYRUVATE_METABOLISM                                  |
| 24                       | KEGG_CYSTEINE_AND_METHIONINE_METABOLISM                   |
| 25                       | KEGG_GLYOXYLATE_AND_DICARBOXYLATE_METABOLISM              |
| 26                       | KEGG_ONE_CARBON_POOL_BY_FOLATE                            |
| 27                       | KEGG_PURINE_METABOLISM                                    |
| 28                       | KEGG_PYRIMIDINE_METABOLISM                                |
| 29                       | KEGG_RNA_POLYMERASE                                       |
| 30                       | KEGG_BASE_EXCISION_REPAIR                                 |
| 31                       | KEGG_HOMOLOGOUS_RECOMBINATION                             |
| 32                       | KEGG_DNA_REPLICATION                                      |
| 33                       | KEGG_MISMATCH_REPAIR                                      |
| 34                       | KEGG_NUCLEOTIDE_EXCISION_REPAIR                           |
| 35                       | KEGG_CELL_CYCLE                                           |
| 36                       | KEGG_NON_HOMOLOGOUS_END_JOINING                           |
| 37                       | KEGG_GLYCOSYLPHOSPHATIDYLINOSITOL_GPI_ANCHOR_BIOSYNTHESIS |
| 38                       | KEGG_SELENOAMINO_ACID_METABOLISM                          |
| 39                       | KEGG_PEROXISOME                                           |
| 40                       | KEGG_BASAL_TRANSCRIPTION_FACTORS                          |
| 41                       | KEGG_UBIQUITIN_MEDIATED_PROTEOLYSIS                       |
| 42                       | KEGG_P53_SIGNALING_PATHWAY                                |
| 43                       | KEGG_OOCYTE_MEIOSIS                                       |
| 44                       | KEGG_PROGESTERONE_MEDIATED_OOCYTE_MATURATION              |
| 45                       | KEGG_RIBOSOME                                             |
| 46                       | KEGG_SPLICEOSOME                                          |
| 47                       | KEGG_PROTEIN_EXPORT                                       |
| 48                       | KEGG_AMINOACYL_TRNA_BIOSYNTHESIS                          |
| 49                       | KEGG_RNA_DEGRADATION                                      |
| 50                       | KEGG_PROTEASOME                                           |
| 51                       | KEGG_OXIDATIVE_PHOSPHORYLATION                            |
| 52                       | KEGG_PARKINSONS_DISEASE                                   |
| 53                       | KEGG_HUNTINGTONS_DISEASE                                  |
| 54                       | KEGG_ALZHEIMERS_DISEASE                                   |
| 55                       | KEGG_CARDIAC_MUSCLE_CONTRACTION                           |

56 KEGG\_PATHOGENIC\_ESCHERICHIA\_COLI\_INFECTION  
57 KEGG\_GLYCOSAMINOGLYCAN\_BIOSYNTHESIS\_CHONDROITIN\_SULFATE  
58 KEGG\_GLYCOSAMINOGLYCAN\_BIOSYNTHESIS\_HEPARAN\_SULFATE  
59 KEGG\_SULFUR\_METABOLISM  
60 KEGG\_PENTOSE\_AND\_GLUCCURONATE\_INTERCONVERSIONS  
61 KEGG\_ASCORBATE\_AND\_ALDARATE\_METABOLISM  
62 KEGG\_PORPHYRIN\_AND\_CHLOROPHYLL\_METABOLISM  
63 KEGG\_GLYCOSAMINOGLYCAN\_BIOSYNTHESIS\_KERATAN\_SULFATE  
64 KEGG\_O\_GLYCAN\_BIOSYNTHESIS  
65 KEGG\_GLYCOSPHINGOLIPID\_BIOSYNTHESIS\_GLOBO\_SERIES  
66 KEGG\_GLYCOSPHINGOLIPID\_BIOSYNTHESIS\_GANGLIO\_SERIES  
67 KEGG\_FOLATE\_BIOSYNTHESIS  
68 KEGG\_RIBOFLAVIN\_METABOLISM  
69 KEGG\_GLYCINE\_SERINE\_AND\_THREONINE\_METABOLISM  
70 KEGG\_TYROSINE\_METABOLISM  
71 KEGG\_PHENYLALANINE\_METABOLISM  
72 KEGG\_PRIMARY\_BILE\_ACID\_BIOSYNTHESIS  
73 KEGG\_HISTIDINE\_METABOLISM  
74 KEGG\_TRYPTOPHAN\_METABOLISM  
75 KEGG\_GLYCEROLIPID\_METABOLISM  
76 KEGG\_STARCH\_AND\_SUCROSE\_METABOLISM  
77 KEGG\_DRUG\_METABOLISM\_OTHER\_ENZYMES  
78 KEGG\_NITROGEN\_METABOLISM  
79 KEGG\_PROXIMAL\_TUBULE\_BICARBONATE\_RECLAMATION  
80 KEGG\_GLYCEROPHOSPHOLIPID\_METABOLISM  
81 KEGG\_ARACHIDONIC\_ACID\_METABOLISM  
82 KEGG\_LINOLEIC\_ACID\_METABOLISM  
83 KEGG\_ETHER\_LIPID\_METABOLISM  
84 KEGG\_ALPHA\_LINOLENIC\_ACID\_METABOLISM  
85 KEGG\_RENIN\_ANGIOTENSIN\_SYSTEM  
86 KEGG\_TAURINE\_AND\_HYPOTAURINE\_METABOLISM  
87 KEGG\_GLYCOSPHINGOLIPID\_BIOSYNTHESIS\_LACTO\_AND\_NEOLACTO\_SERIES  
88 KEGG\_ABC\_TRANSPORTERS  
89 KEGG\_PPAR\_SIGNALING\_PATHWAY  
90 KEGG\_STEROID\_HORMONE\_BIOSYNTHESIS  
91 KEGG\_RETINOL\_METABOLISM  
92 KEGG\_METABOLISM\_OF\_XENOBIOTICS\_BY\_CYTOCHROME\_P450  
93 KEGG\_DRUG\_METABOLISM\_CYTOCHROME\_P450  
94 KEGG\_COMPLEMENT\_AND\_COAGULATION\_CASCADES  
95 KEGG\_CALCIIUM\_SIGNALING\_PATHWAY  
96 KEGG\_NEUROACTIVE\_LIGAND\_RECEPTOR\_INTERACTION  
97 KEGG\_OLFACTORY\_TRANSDUCTION  
98 KEGG\_CYTOKINE\_CYTOKINE\_RECEPTOR\_INTERACTION  
99 KEGG\_JAK\_STAT\_SIGNALING\_PATHWAY  
100 KEGG\_FOCAL\_ADHESION  
101 KEGG\_ECM\_RECEPTOR\_INTERACTION  
102 KEGG\_ARRHYTHMOGENIC\_RIGHT\_VENTRICULAR\_CARDIOMYOPATHY\_ARVC  
103 KEGG\_HYPERTROPHIC\_CARDIOMYOPATHY\_HCM  
104 KEGG\_DILATED\_CARDIOMYOPATHY  
105 KEGG\_MATURITY\_ONSET\_DIABETES\_OF\_THE\_YOUNG  
106 KEGG\_HEMATOPOIETIC\_CELL\_LINEAGE  
107 KEGG\_SPHINGOLIPID\_METABOLISM  
108 KEGG\_OTHER\_GLYCAN\_DEGRADATION  
109 KEGG\_LYSOSOME  
110 KEGG\_N\_GLYCAN\_BIOSYNTHESIS  
111 KEGG\_SNARE\_INTERACTIONS\_IN\_VESICULAR\_TRANSPORT  
112 KEGG\_VASOPRESSIN\_REGULATED\_WATER\_REABSORPTION  
113 KEGG\_VIBRIO\_CHOLERAЕ\_INFECTION  
114 KEGG\_GLYCOSAMINOGLYCAN\_DEGRADATION  
115 KEGG\_REGULATION\_OF\_AUTOPHAGY  
116 KEGG\_ADIPOCYTOKINE\_SIGNALING\_PATHWAY  
117 KEGG\_ENDOCYTOSIS

118 KEGG\_CHEMOKINE\_SIGNALING\_PATHWAY  
119 KEGG\_MAPK\_SIGNALING\_PATHWAY  
120 KEGG\_REGULATION\_OF\_ACTIN\_CYTOSKELETON  
121 KEGG\_AXON\_GUIDANCE  
122 KEGG\_VEGF\_SIGNALING\_PATHWAY  
123 KEGG\_FC\_EPSILON\_RI\_SIGNALING\_PATHWAY  
124 KEGG\_INSULIN\_SIGNALING\_PATHWAY  
125 KEGG\_TOLL\_LIKE\_RECEPTOR\_SIGNALING\_PATHWAY  
126 KEGG\_RIG\_I\_LIKE\_RECEPTOR\_SIGNALING\_PATHWAY  
127 KEGG\_CYTOSOLIC\_DNA\_SENSING\_PATHWAY  
128 KEGG\_CELL\_ADHESION\_MOLECULES\_CAMS  
129 KEGG\_LEUKOCYTE\_TRANSENDOTHELIAL\_MIGRATION  
130 KEGG\_NATURAL\_KILLER\_CELL\_MEDIATED\_CYTOTOXICITY  
131 KEGG\_NOD\_LIKE\_RECEPTOR\_SIGNALING\_PATHWAY  
132 KEGG\_EPITHELIAL\_CELL\_SIGNALING\_IN\_HELICOBACTER\_PYLORI\_INFECTION  
133 KEGG\_AMYOTROPHIC\_LATERAL\_SCLEROSIS\_ALS  
134 KEGG\_PRION\_DISEASES  
135 KEGG\_LEISHMANIA\_INFECTION  
136 KEGG\_INTESTINAL\_IMMUNE\_NETWORK\_FOR\_IGA\_PRODUCTION  
137 KEGG\_AUTOIMMUNE\_THYROID\_DISEASE  
138 KEGG\_ASTHMA  
139 KEGG\_ANTIGEN\_PROCESSING\_AND\_PRESENTATION  
140 KEGG\_TYPE\_I\_DIABETES\_MELLITUS  
141 KEGG\_ALLOGRAFT\_REJECTION  
142 KEGG\_GRAFT\_VERSUS\_HOST\_DISEASE  
143 KEGG\_VIRAL\_MYOCARDITIS  
144 KEGG\_SYSTEMIC\_LUPUS\_ERYTHEMATOSUS  
145 KEGG\_INOSITOL\_PHOSPHATE\_METABOLISM  
146 KEGG\_PHOSPHATIDYLINOSITOL\_SIGNALING\_SYSTEM  
147 KEGG\_NOTCH\_SIGNALING\_PATHWAY  
148 KEGG\_GAP\_JUNCTION  
149 KEGG\_VASCULAR\_SMOOTH\_MUSCLE\_CONTRACTION  
150 KEGG\_GNRH\_SIGNALING\_PATHWAY  
151 KEGG\_LONG\_TERM\_DEPRESSION  
152 KEGG\_LONG\_TERM\_POTENTIATION  
153 KEGG\_ADHERENS\_JUNCTION  
154 KEGG\_TGF\_BETA\_SIGNALING\_PATHWAY  
155 KEGG\_TYPE\_II\_DIABETES\_MELLITUS  
156 KEGG\_TIGHT\_JUNCTION  
157 KEGG\_TASTE\_TRANSDUCTION  
158 KEGG\_HEDGEHOG\_SIGNALING\_PATHWAY  
159 KEGG\_MELANOGENESIS  
160 KEGG\_BASAL\_CELL\_CARCINOMA  
161 KEGG\_ALDOSTERONE\_REGULATED\_SODIUM\_REABSORPTION  
162 KEGG\_WNT\_SIGNALING\_PATHWAY  
163 KEGG\_SMALL\_CELL\_LUNG\_CANCER  
164 KEGG\_DORSO\_VENTRAL\_AXIS\_FORMATION  
165 KEGG\_THYROID\_CANCER  
166 KEGG\_MTOR\_SIGNALING\_PATHWAY  
167 KEGG\_ENDOMETRIAL\_CANCER  
168 KEGG\_ERBB\_SIGNALING\_PATHWAY  
169 KEGG\_GLIOMA  
170 KEGG\_NON\_SMALL\_CELL\_LUNG\_CANCER  
171 KEGG\_PATHWAYS\_IN\_CANCER  
172 KEGG\_MELANOMA  
173 KEGG\_PROSTATE\_CANCER  
174 KEGG\_BLADDER\_CANCER  
175 KEGG\_APOPTOSIS  
176 KEGG\_B\_CELL\_RECEPTOR\_SIGNALING\_PATHWAY  
177 KEGG\_FC\_GAMMA\_R\_MEDIATED\_PHAGOCYTOSIS  
178 KEGG\_NEUROTROPHIN\_SIGNALING\_PATHWAY  
179 KEGG\_RENAL\_CELL\_CARCINOMA

|     |                                        |
|-----|----------------------------------------|
| 180 | KEGG_PANCREATIC_CANCER                 |
| 181 | KEGG_CHRONIC_MYELOID_LEUKEMIA          |
| 182 | KEGG_ACUTE_MYELOID_LEUKEMIA            |
| 183 | KEGG_COLORECTAL_CANCER                 |
| 184 | KEGG_T_CELL_RECEPTOR_SIGNALING_PATHWAY |
| 185 | KEGG_PRIMARY_IMMUNODEFICIENCY          |
| 186 | KEGG_CIRCADIEN_RHYTHM_MAMMAL           |

**Supplemental Table 3B:** List of ranked KEGG pathways as shown in the heatmap of GSE13351 data in Supplementary Figure 2A. ONE CARBON POOL BY FOLATE, PURINE and PYRIMIDINE pathways are

| Rank heatmap<br>GSE13351 | KEGG pathway                                              |
|--------------------------|-----------------------------------------------------------|
| 1                        | KEGG_RIBOSOME                                             |
| 2                        | KEGG_TAURINE_AND_HYPOTAURINE_METABOLISM                   |
| 3                        | KEGG_ETHER_LIPID_METABOLISM                               |
| 4                        | KEGG_NITROGEN_METABOLISM                                  |
| 5                        | KEGG_MATURITY_ONSET_DIABETES_OF_THE_YOUNG                 |
| 6                        | KEGG_RETINOL_METABOLISM                                   |
| 7                        | KEGG_LINOLEIC_ACID_METABOLISM                             |
| 8                        | KEGG_SPLICEOSOME                                          |
| 9                        | KEGG_PROTEIN_EXPORT                                       |
| 10                       | KEGG_STEROID_BIOSYNTHESIS                                 |
| 11                       | KEGG_PROXIMAL_TUBULE_BICARBONATE_RECLAMATION              |
| 12                       | KEGG_GLYCINE_SERINE_AND_THREONINE_METABOLISM              |
| 13                       | KEGG_SULFUR_METABOLISM                                    |
| 14                       | KEGG_PPAR_SIGNALING_PATHWAY                               |
| 15                       | KEGG_ALPHA_LINOLENIC_ACID_METABOLISM                      |
| 16                       | KEGG_NICOTINATE_AND_NICOTINAMIDE_METABOLISM               |
| 17                       | KEGG_PRIMARY_BILE_ACID_BIOSYNTHESIS                       |
| 18                       | KEGG_RIBOFLAVIN_METABOLISM                                |
| 19                       | KEGG_PANTOTHENATE_AND_COA_BIOSYNTHESIS                    |
| 20                       | KEGG_SELENOAMINO_ACID_METABOLISM                          |
| 21                       | KEGG_TERPENOID_BACKBONE_BIOSYNTHESIS                      |
| 22                       | KEGG_ALANINE_ASPARTATE_AND_GLUTAMATE_METABOLISM           |
| 23                       | KEGG_STEROID_HORMONE_BIOSYNTHESIS                         |
| 24                       | KEGG_GLYCOSYLPHOSPHATIDYLINOSITOL_GPI_ANCHOR_BIOSYNTHESIS |
| 25                       | KEGG_TYROSINE_METABOLISM                                  |
| 26                       | KEGG_PHENYLALANINE_METABOLISM                             |
| 27                       | KEGG_STARCH_AND_SUCROSE_METABOLISM                        |
| 28                       | KEGG_PORPHYRIN_AND_CHLOROPHYLL_METABOLISM                 |
| 29                       | KEGG_GLUTATHIONE_METABOLISM                               |
| 30                       | KEGG_VALINE_LEUCINE_AND_ISOLEUCINE_BIOSYNTHESIS           |
| 31                       | KEGG_CYSTEINE_AND_METHIONINE_METABOLISM                   |
| 32                       | KEGG_PEROXISOME                                           |
| 33                       | KEGG_PENTOSE_AND_GLUCURONATE_INTERCONVERSIONS             |
| 34                       | KEGG_TRYPTOPHAN_METABOLISM                                |
| 35                       | KEGG_VALINE_LEUCINE_AND_ISOLEUCINE_DEGRADATION            |
| 36                       | KEGG_PYRUVATE_METABOLISM                                  |
| 37                       | KEGG_PROPANOATE_METABOLISM                                |
| 38                       | KEGG_BETA_ALANINE_METABOLISM                              |
| 39                       | KEGG_BUTANOATE_METABOLISM                                 |
| 40                       | KEGG_FATTY_ACID_METABOLISM                                |
| 41                       | KEGG_PENTOSE_PHOSPHATE_PATHWAY                            |
| 42                       | KEGG_GLYCOLYSIS_GLUCONEOGENESIS                           |
| 43                       | KEGG_FRUCTOSE_AND_MANNOSE_METABOLISM                      |
| 44                       | KEGG_AMINO_SUGAR_AND_NUCLEOTIDE_SUGAR_METABOLISM          |
| 45                       | KEGG_GALACTOSE_METABOLISM                                 |
| 46                       | KEGG_GLYOXYLATE_AND_DICARBOXYLATE_METABOLISM              |
| 47                       | KEGG_CITRATE_CYCLE_TCA_CYCLE                              |
| 48                       | KEGG_LYSINE_DEGRADATION                                   |
| 49                       | KEGG_NON_HOMOLOGOUS_END_JOINING                           |
| 50                       | KEGG_RNA_POLYMERASE                                       |
| 51                       | KEGG_RNA_DEGRADATION                                      |
| 52                       | KEGG_PYRIMIDINE_METABOLISM                                |
| 53                       | KEGG_PURINE_METABOLISM                                    |
| 54                       | KEGG_NUCLEOTIDE_EXCISION_REPAIR                           |
| 55                       | KEGG_MISMATCH_REPAIR                                      |
| 56                       | KEGG_DNA_REPLICATION                                      |
| 57                       | KEGG_BASE_EXCISION_REPAIR                                 |
| 58                       | KEGG_HOMOLOGOUS_RECOMBINATION                             |
| 59                       | KEGG_CELL_CYCLE                                           |
| 60                       | KEGG_PROTEASOME                                           |
| 61                       | KEGG_PARKINSONS_DISEASE                                   |

62 KEGG\_OXIDATIVE\_PHOSPHORYLATION  
63 KEGG\_HUNTINGTONS\_DISEASE  
64 KEGG\_ALZHEIMERS\_DISEASE  
65 KEGG\_CARDIAC\_MUSCLE\_CONTRACTION  
66 KEGG\_HISTIDINE\_METABOLISM  
67 KEGG\_GLYCEROLIPID\_METABOLISM  
68 KEGG\_LIMONENE\_AND\_PINENE\_DEGRADATION  
69 KEGG\_ASCORBATE\_AND\_ALDARATE\_METABOLISM  
70 KEGG\_ONE\_CARBON\_POOL\_BY\_FOLATE  
71 KEGG\_AMINOACYL\_TRNA\_BIOSYNTHESIS  
72 KEGG\_DRUG\_METABOLISM\_OTHER\_ENZYMES  
73 KEGG\_METABOLISM\_OF\_XENOBIOTICS\_BY\_CYTOCHROME\_P450  
74 KEGG\_DRUG\_METABOLISM\_CYTOCHROME\_P450  
75 KEGG\_ARACHIDONIC\_ACID\_METABOLISM  
76 KEGG\_BIOSYNTHESIS\_OF\_UNSATURATED\_FATTY\_ACIDS  
77 KEGG\_P53\_SIGNALING\_PATHWAY  
78 KEGG\_SNARE\_INTERACTIONS\_IN\_VESICULAR\_TRANSPORT  
79 KEGG\_GLYCEROPHOSPHOLIPID\_METABOLISM  
80 KEGG\_N\_GLYCAN\_BIOSYNTHESIS  
81 KEGG\_VIBRIO\_CHOLERAE\_INFECTION  
82 KEGG\_AMYOTROPHIC\_LATERAL\_SCLEROSIS\_ALS  
83 KEGG\_PROGESTERONE\_MEDIATED\_OOCYTE\_MATURATION  
84 KEGG\_OOCYTE\_MEIOSIS  
85 KEGG\_BASAL\_TRANSCRIPTION\_FACTORS  
86 KEGG\_FOLATE\_BIOSYNTHESIS  
87 KEGG\_ARGININE\_AND\_PROLINE\_METABOLISM  
88 KEGG\_SYSTEMIC\_LUPUS\_ERYTHEMATOSUS  
89 KEGG\_OLFACTORY\_TRANSDUCTION  
90 KEGG\_NEUROACTIVE\_LIGAND\_RECEPTOR\_INTERACTION  
91 KEGG\_T\_CELL\_RECEPTOR\_SIGNALING\_PATHWAY  
92 KEGG\_PHOSPHATIDYLINOSITOL\_SIGNALING\_SYSTEM  
93 KEGG\_INOSITOL\_PHOSPHATE\_METABOLISM  
94 KEGG\_PRIMARY\_IMMUNODEFICIENCY  
95 KEGG\_ABC\_TRANSPORTERS  
96 KEGG\_RENIN\_ANGIOTENSIN\_SYSTEM  
97 KEGG\_HEMATOPOIETIC\_CELL\_LINEAGE  
98 KEGG\_COMPLEMENT\_AND\_COAGULATION\_CASCADES  
99 KEGG\_O\_GLYCAN\_BIOSYNTHESIS  
100 KEGG\_OTHER\_GLYCAN\_DEGRADATION  
101 KEGG\_LYSOSOME  
102 KEGG\_GLYCOSAMINOGLYCAN\_DEGRADATION  
103 KEGG\_GLYCOSPHINGOLIPID\_BIOSYNTHESIS\_GLOBO\_SERIES  
104 KEGG\_GLYCOSPHINGOLIPID\_BIOSYNTHESIS\_GANGLIO\_SERIES  
105 KEGG\_TASTE\_TRANSDUCTION  
106 KEGG\_HEDGEHOG\_SIGNALING\_PATHWAY  
107 KEGG\_BASAL\_CELL\_CARCINOMA  
108 KEGG\_REGULATION\_OF\_AUTOPHAGY  
109 KEGG\_THYROID\_CANCER  
110 KEGG\_VASOPRESSIN\_REGULATED\_WATER\_REABSORPTION  
111 KEGG\_UBIQUITIN\_MEDIATED\_PROTEOLYSIS  
112 KEGG\_TGF\_BETA\_SIGNALING\_PATHWAY  
113 KEGG\_TYPE\_II\_DIABETES\_MELLITUS  
114 KEGG\_AXON\_GUIDANCE  
115 KEGG\_ALDOSTERONE\_REGULATED\_SODIUM\_REABSORPTION  
116 KEGG\_NOTCH\_SIGNALING\_PATHWAY  
117 KEGG\_MELANOGENESIS  
118 KEGG\_LONG\_TERM\_POTENTIATION  
119 KEGG\_MAPK\_SIGNALING\_PATHWAY  
120 KEGG\_GNRH\_SIGNALING\_PATHWAY  
121 KEGG\_LONG\_TERM\_DEPRESSION  
122 KEGG\_GAP\_JUNCTION  
123 KEGG\_VASCULAR\_SMOOTH\_MUSCLE\_CONTRACTION  
124 KEGG\_MTOR\_SIGNALING\_PATHWAY  
125 KEGG\_LEUKOCYTE\_TRANSENDOTHELIAL\_MIGRATION  
126 KEGG\_VEGF\_SIGNALING\_PATHWAY  
127 KEGG\_FC\_EPSILON\_R1\_SIGNALING\_PATHWAY  
128 KEGG\_REGULATION\_OF\_ACTIN\_CYTOSKELETON  
129 KEGG\_FOCAL\_ADHESION

130 KEGG\_FC\_GAMMA\_R\_MEDIATED\_PHAGOCYTOSIS  
131 KEGG\_CHEMOKINE\_SIGNALING\_PATHWAY  
132 KEGG\_B\_CELL\_RECEPTOR\_SIGNALING\_PATHWAY  
133 KEGG\_ENDOCYTOSIS  
134 KEGG\_WNT\_SIGNALING\_PATHWAY  
135 KEGG\_ADHERENS\_JUNCTION  
136 KEGG\_SMALL\_CELL\_LUNG\_CANCER  
137 KEGG\_PATHWAYS\_IN\_CANCER  
138 KEGG\_PANCREATIC\_CANCER  
139 KEGG\_NON\_SMALL\_CELL\_LUNG\_CANCER  
140 KEGG\_GLIOMA  
141 KEGG\_ENDOMETRIAL\_CANCER  
142 KEGG\_COLORECTAL\_CANCER  
143 KEGG\_PROSTATE\_CANCER  
144 KEGG\_RENAL\_CELL\_CARCINOMA  
145 KEGG\_NEUROTROPHIN\_SIGNALING\_PATHWAY  
146 KEGG\_CHRONIC\_MYELOID\_LEUKEMIA  
147 KEGG\_ACUTE\_MYELOID\_LEUKEMIA  
148 KEGG\_INSULIN\_SIGNALING\_PATHWAY  
149 KEGG\_ERBB\_SIGNALING\_PATHWAY  
150 KEGG\_MELANOMA  
151 KEGG\_BLADDER\_CANCER  
152 KEGG\_EPITHELIAL\_CELL\_SIGNALING\_IN\_HELICOBACTER\_PYLORI\_INFECTION  
153 KEGG\_PRION\_DISEASES  
154 KEGG\_SPHINGOLIPID\_METABOLISM  
155 KEGG\_RIG\_I\_LIKE\_RECEPTOR\_SIGNALING\_PATHWAY  
156 KEGG\_NOD\_LIKE\_RECEPTOR\_SIGNALING\_PATHWAY  
157 KEGG\_NATURAL\_KILLER\_CELL\_MEDIATED\_CYTOTOXICITY  
158 KEGG\_TOLL\_LIKE\_RECEPTOR\_SIGNALING\_PATHWAY  
159 KEGG\_APOPTOSIS  
160 KEGG\_JAK\_STAT\_SIGNALING\_PATHWAY  
161 KEGG\_CYTOKINE\_CYTOKINE\_RECEPTOR\_INTERACTION  
162 KEGG\_ADIPOCYTOKINE\_SIGNALING\_PATHWAY  
163 KEGG\_CYTOSOLIC\_DNA\_SENSING\_PATHWAY  
164 KEGG\_INTESTINAL\_IMMUNE\_NETWORK\_FOR\_IGA\_PRODUCTION  
165 KEGG\_LEISHMANIA\_INFECTION  
166 KEGG\_VIRAL\_MYOCARDITIS  
167 KEGG\_GRAFT\_VERSUS\_HOST\_DISEASE  
168 KEGG\_TYPE\_I\_DIABETES\_MELLITUS  
169 KEGG\_ALLOGRAFT\_REJECTION  
170 KEGG\_AUTOIMMUNE\_THYROID\_DISEASE  
171 KEGG\_ASTHMA  
172 KEGG\_ANTIGEN\_PROCESSING\_AND\_PRESENTATION  
173 KEGG\_CELL\_ADHESION\_MOLECULES\_CAMS  
174 KEGG\_TIGHT\_JUNCTION  
175 KEGG\_PATHOGENIC\_ESCHERICHIA\_COLI\_INFECTION  
176 KEGG\_ECM\_RECEPTOR\_INTERACTION  
177 KEGG\_HYPERTROPHIC\_CARDIOMYOPATHY\_HCM  
178 KEGG\_DILATED\_CARDIOMYOPATHY  
179 KEGG\_ARRHYTHMOGENIC\_RIGHT\_VENTRICULAR\_CARDIOMYOPATHY\_ARVC  
180 KEGG\_CALCIIUM\_SIGNALING\_PATHWAY  
181 KEGG\_GLYCOSPHINGOLIPID\_BIOSYNTHESIS\_LACTO\_AND\_NEOLACTO\_SERIES  
182 KEGG\_GLYCOSAMINOGLYCAN\_BIOSYNTHESIS\_KERATAN\_SULFATE  
183 KEGG\_DORSO\_VENTRAL\_AXIS\_FORMATION  
184 KEGG\_CIRCADIAN\_RHYTHM\_MAMMAL  
185 KEGG\_GLYCOSAMINOGLYCAN\_BIOSYNTHESIS\_HEPARAN\_SULFATE  
186 KEGG\_GLYCOSAMINOGLYCAN\_BIOSYNTHESIS\_CHONDROITIN\_SULFATE

**Supplemental Table 3C:** List of ranked KEGG pathways as shown in the heatmap of TARGET T-ALL data in Figure 2A. ONE CARBON POOL BY FOLATE, PURINE and PYRIMIDINE pathways are highlighted red.

| Rank heatmap<br>TARGET T-ALL | KEGG pathway                                              |
|------------------------------|-----------------------------------------------------------|
| 1                            | KEGG_PENTOSE_PHOSPHATE_PATHWAY                            |
| 2                            | KEGG_FRUCTOSE_AND_MANNOSE_METABOLISM                      |
| 3                            | KEGG_GALACTOSE_METABOLISM                                 |
| 4                            | KEGG_AMINO_SUGAR_AND_NUCLEOTIDE_SUGAR_METABOLISM          |
| 5                            | KEGG_PORPHYRIN_AND_CHLOROPHYLL_METABOLISM                 |
| 6                            | KEGG_DRUG_METABOLISM_OTHER_ENZYMES                        |
| 7                            | KEGG_GLYCOSYLPHOSPHATIDYLINOSITOL_GPI_ANCHOR_BIOSYNTHESIS |
| 8                            | KEGG_LYSINE_DEGRADATION                                   |
| 9                            | KEGG_CYSTEINE_AND_METHIONINE_METABOLISM                   |
| 10                           | KEGG_SELENOAMINO_ACID_METABOLISM                          |
| 11                           | KEGG_ALANINE_ASPARTATE_AND_GLUTAMATE_METABOLISM           |
| 12                           | KEGG_BETA_ALANINE_METABOLISM                              |
| 13                           | KEGG_HISTIDINE_METABOLISM                                 |
| 14                           | KEGG_ARGININE_AND_PROLINE_METABOLISM                      |
| 15                           | KEGG_GLUTATHIONE_METABOLISM                               |
| 16                           | KEGG_GLYCOLYSIS_GLUONEOGENESIS                            |
| 17                           | KEGG_PYRUVATE_METABOLISM                                  |
| 18                           | KEGG_TRYPTOPHAN_METABOLISM                                |
| 19                           | KEGG_ASCORBATE_AND_ALDARATE_METABOLISM                    |
| 20                           | KEGG_LIMONENE_AND_PINENE_DEGRADATION                      |
| 21                           | KEGG_VALINE_LEUCINE_AND_ISOLEUCINE_DEGRADATION            |
| 22                           | KEGG_PROPANOATE_METABOLISM                                |
| 23                           | KEGG_BUTANOATE_METABOLISM                                 |
| 24                           | KEGG_FATTY_ACID_METABOLISM                                |
| 25                           | KEGG_PEROXISOME                                           |
| 26                           | KEGG_VALINE_LEUCINE_AND_ISOLEUCINE_BIOSYNTHESIS           |
| 27                           | KEGG_AMINOACYL_TRNA_BIOSYNTHESIS                          |
| 28                           | KEGG_PENTOSE_AND_GLUCURONATE_INTERCONVERSIONS             |
| 29                           | KEGG_ONE_CARBON_POOL_BY_FOLATE                            |
| 30                           | KEGG_PYRIMIDINE_METABOLISM                                |
| 31                           | KEGG_PURINE_METABOLISM                                    |
| 32                           | KEGG_RNA_POLYMERASE                                       |
| 33                           | KEGG_GLYOXYLATE_AND_DICARBOXYLATE_METABOLISM              |
| 34                           | KEGG_BASE_EXCISION_REPAIR                                 |
| 35                           | KEGG_DNA_REPLICATION                                      |
| 36                           | KEGG_MISMATCH_REPAIR                                      |
| 37                           | KEGG_NUCLEOTIDE_EXCISION_REPAIR                           |
| 38                           | KEGG_HOMOLOGOUS_RECOMBINATION                             |
| 39                           | KEGG_TYROSINE_METABOLISM                                  |
| 40                           | KEGG_PHENYLALANINE_METABOLISM                             |
| 41                           | KEGG_RIBOSOME                                             |
| 42                           | KEGG_N_GLYCAN_BIOSYNTHESIS                                |
| 43                           | KEGG_CITRATE_CYCLE_TCA_CYCLE                              |
| 44                           | KEGG_PROTEASOME                                           |
| 45                           | KEGG_OXIDATIVE_PHOSPHORYLATION                            |
| 46                           | KEGG_PARKINSONS_DISEASE                                   |
| 47                           | KEGG_HUNTINGTONS_DISEASE                                  |
| 48                           | KEGG_ALZHEIMERS_DISEASE                                   |
| 49                           | KEGG_CARDIAC_MUSCLE_CONTRACTION                           |
| 50                           | KEGG_STEROID_HORMONE_BIOSYNTHESIS                         |
| 51                           | KEGG_METABOLISM_OF_XENOBIOTICS_BY_CYTOCHROME_P450         |
| 52                           | KEGG_DRUG_METABOLISM_CYTOCHROME_P450                      |
| 53                           | KEGG_FOLATE_BIOSYNTHESIS                                  |
| 54                           | KEGG_STEROID_BIOSYNTHESIS                                 |
| 55                           | KEGG_TERPENOID_BACKBONE_BIOSYNTHESIS                      |
| 56                           | KEGG_BIOSYNTHESIS_OF_UNSATURATED_FATTY_ACIDS              |
| 57                           | KEGG_PROXIMAL_TUBULE_BICARBONATE_RECLAMATION              |

58 KEGG\_NON\_HOMOLOGOUS\_END\_JOINING  
59 KEGG\_PRIMARY\_IMMUNODEFICIENCY  
60 KEGG\_STARCH\_AND\_SUCROSE\_METABOLISM  
61 KEGG\_GLYCEROLIPID\_METABOLISM  
62 KEGG\_GLYCEROPHOSPHOLIPID\_METABOLISM  
63 KEGG\_PPAR\_SIGNALING\_PATHWAY  
64 KEGG\_NICOTINATE\_AND\_NICOTINAMIDE\_METABOLISM  
65 KEGG\_SULFUR\_METABOLISM  
66 KEGG\_GLYCOSAMINOGLYCAN\_BIOSYNTHESIS\_CHONDROITIN\_SULFATE  
67 KEGG\_GLYCOSAMINOGLYCAN\_BIOSYNTHESIS\_HEPARAN\_SULFATE  
68 KEGG\_GLYCOSPHINGOLIPID\_BIOSYNTHESIS\_GLOBO\_SERIES  
69 KEGG\_AMYOTROPHIC\_LATERAL\_SCLEROSIS\_ALS  
70 KEGG\_PRION\_DISEASES  
71 KEGG\_VIBRIO\_CHOLERAЕ\_INFECTION  
72 KEGG\_GLYCINE\_SERINE\_AND\_THREONINE\_METABOLISM  
73 KEGG\_RIBOFLAVIN\_METABOLISM  
74 KEGG\_PROTEIN\_EXPORT  
75 KEGG\_BASAL\_TRANSCRIPTION\_FACTORS  
76 KEGG\_RNA\_DEGRADATION  
77 KEGG\_SPLICEOSOME  
78 KEGG\_P53\_SIGNALING\_PATHWAY  
79 KEGG\_CELL\_CYCLE  
80 KEGG\_OOCYTE\_MEIOSIS  
81 KEGG\_PROGESTERONE\_MEDIATED\_OOCYTE\_MATURATION  
82 KEGG\_PATHOGENIC\_ESCHERICHIA\_COLI\_INFECTION  
83 KEGG\_NITROGEN\_METABOLISM  
84 KEGG\_ARACHIDONIC\_ACID\_METABOLISM  
85 KEGG\_LINOLEIC\_ACID\_METABOLISM  
86 KEGG\_ALPHA\_LINOLENIC\_ACID\_METABOLISM  
87 KEGG\_RETINOL\_METABOLISM  
88 KEGG\_PRIMARY\_BILE\_ACID\_BIOSYNTHESIS  
89 KEGG\_OLFACTORY\_TRANSDUCTION  
90 KEGG\_TASTE\_TRANSDUCTION  
91 KEGG\_PANTOTHENATE\_AND\_COA\_BIOSYNTHESIS  
92 KEGG\_SNARE\_INTERACTIONS\_IN\_VESICULAR\_TRANSPORT  
93 KEGG\_REGULATION\_OF\_AUTOPHAGY  
94 KEGG\_O\_GLYCAN\_BIOSYNTHESIS  
95 KEGG\_GLYCOSAMINOGLYCAN\_BIOSYNTHESIS\_KERATAN\_SULFATE  
96 KEGG\_GLYCOPHINGOLIPID\_BIOSYNTHESIS\_LACTO\_AND\_NEOLACTO\_SERIES  
97 KEGG\_GLYCOPHINGOLIPID\_BIOSYNTHESIS\_GANGLIO\_SERIES  
98 KEGG\_SPHINGOLIPID\_METABOLISM  
99 KEGG\_GLYCOSAMINOGLYCAN\_DEGRADATION  
100 KEGG\_OTHER\_GLYCAN\_DEGRADATION  
101 KEGG\_LYSOSOME  
102 KEGG\_NEUROACTIVE\_LIGAND\_RECEPTOR\_INTERACTION  
103 KEGG\_ECM\_RECEPTOR\_INTERACTION  
104 KEGG\_COMPLEMENT\_AND\_COAGULATION\_CASCADES  
105 KEGG\_RENIN\_ANGIOTENSIN\_SYSTEM  
106 KEGG\_CYTOSOLIC\_DNA\_SENSING\_PATHWAY  
107 KEGG\_HEMATOPOIETIC\_CELL\_LINEAGE  
108 KEGG\_ANTIGEN\_PROCESSING\_AND\_PRESENTATION  
109 KEGG\_CELL\_ADHESION\_MOLECULES\_CAMS  
110 KEGG\_LEISHMANIA\_INFECTION  
111 KEGG\_INTESTINAL\_IMMUNE\_NETWORK\_FOR\_IGA\_PRODUCTION  
112 KEGG\_ASTHMA  
113 KEGG\_TYPE\_I\_DIABETES\_MELLITUS  
114 KEGG\_ALLOGRAFT\_REJECTION  
115 KEGG\_GRAFT\_VERSUS\_HOST\_DISEASE  
116 KEGG\_AUTOIMMUNE\_THYROID\_DISEASE  
117 KEGG\_VIRAL\_MYOCARDITIS  
118 KEGG\_SYSTEMIC\_LUPUS\_ERYTHEMATOSUS  
119 KEGG\_TAURINE\_AND\_HYPOTAURINE\_METABOLISM  
120 KEGG\_ETHER\_LIPID\_METABOLISM  
121 KEGG\_DORSO\_VENTRAL\_AXIS\_FORMATION

122 KEGG\_UBIQUITIN\_MEDIATED\_PROTEOLYSIS  
123 KEGG\_TGF\_BETA\_SIGNALING\_PATHWAY  
124 KEGG\_WNT\_SIGNALING\_PATHWAY  
125 KEGG\_ADHERENS\_JUNCTION  
126 KEGG\_TIGHT\_JUNCTION  
127 KEGG\_NOTCH\_SIGNALING\_PATHWAY  
128 KEGG\_CIRCADIAN\_RHYTHM\_MAMMAL  
129 KEGG\_ABC\_TRANSPORTERS  
130 KEGG\_INOSITOL\_PHOSPHATE\_METABOLISM  
131 KEGG\_PHOSPHATIDYLINOSITOL\_SIGNALING\_SYSTEM  
132 KEGG\_CALCIIUM\_SIGNALING\_PATHWAY  
133 KEGG\_VASCULAR\_SMOOTH\_MUSCLE\_CONTRACTION  
134 KEGG\_ARRHYTHMOGENIC\_RIGHT\_VENTRICULAR\_CARDIOMYOPATHY\_ARVC  
135 KEGG\_HYPERTROPHIC\_CARDIOMYOPATHY\_HCM  
136 KEGG\_DILATED\_CARDIOMYOPATHY  
137 KEGG\_AXON\_GUIDANCE  
138 KEGG\_GAP\_JUNCTION  
139 KEGG\_MELANOGENESIS  
140 KEGG\_ENDOCYTOSIS  
141 KEGG\_FC\_GAMMA\_R\_MEDIATED\_PHAGOCYTOSIS  
142 KEGG\_CYTOKINE\_CYTOKINE\_RECEPTOR\_INTERACTION  
143 KEGG\_CHEMOKINE\_SIGNALING\_PATHWAY  
144 KEGG\_NOD\_LIKE\_RECEPTOR\_SIGNALING\_PATHWAY  
145 KEGG\_TOLL\_LIKE\_RECEPTOR\_SIGNALING\_PATHWAY  
146 KEGG\_JAK\_STAT\_SIGNALING\_PATHWAY  
147 KEGG\_APOPTOSIS  
148 KEGG\_B\_CELL\_RECEPTOR\_SIGNALING\_PATHWAY  
149 KEGG\_LEUKOCYTE\_TRANSENDOTHELIAL\_MIGRATION  
150 KEGG\_NATURAL\_KILLER\_CELL\_MEDIATED\_CYTOTOXICITY  
151 KEGG\_EPITHELIAL\_CELL\_SIGNALING\_IN\_HELICOBACTER\_PYLORI\_INFECTION  
152 KEGG\_ADIPOCYTOKINE\_SIGNALING\_PATHWAY  
153 KEGG\_RIG\_I\_LIKE\_RECEPTOR\_SIGNALING\_PATHWAY  
154 KEGG\_T\_CELL\_RECEPTOR\_SIGNALING\_PATHWAY  
155 KEGG\_LONG\_TERM\_POTENTIATION  
156 KEGG\_LONG\_TERM\_DEPRESSION  
157 KEGG\_MAPK\_SIGNALING\_PATHWAY  
158 KEGG\_FC\_EPSILON\_RI\_SIGNALING\_PATHWAY  
159 KEGG\_GNRH\_SIGNALING\_PATHWAY  
160 KEGG\_VEGF\_SIGNALING\_PATHWAY  
161 KEGG\_ACUTE\_MYELOID\_LEUKEMIA  
162 KEGG\_MTOR\_SIGNALING\_PATHWAY  
163 KEGG\_ERBB\_SIGNALING\_PATHWAY  
164 KEGG\_NEUROTROPHIN\_SIGNALING\_PATHWAY  
165 KEGG\_RENAL\_CELL\_CARCINOMA  
166 KEGG\_INSULIN\_SIGNALING\_PATHWAY  
167 KEGG\_ENDOMETRIAL\_CANCER  
168 KEGG\_CHRONIC\_MYELOID\_LEUKEMIA  
169 KEGG\_COLORECTAL\_CANCER  
170 KEGG\_PROSTATE\_CANCER  
171 KEGG\_REGULATION\_OF\_ACTIN\_CYTOSKELETON  
172 KEGG\_FOCAL\_ADHESION  
173 KEGG\_PATHWAYS\_IN\_CANCER  
174 KEGG\_PANCREATIC\_CANCER  
175 KEGG\_MELANOMA  
176 KEGG\_GLIOMA  
177 KEGG\_NON\_SMALL\_CELL\_LUNG\_CANCER  
178 KEGG\_SMALL\_CELL\_LUNG\_CANCER  
179 KEGG\_TYPE\_II\_DIABETES\_MELLITUS  
180 KEGG\_ALDOSTERONE\_REGULATED\_SODIUM\_REABSORPTION  
181 KEGG\_THYROID\_CANCER  
182 KEGG\_BLADDER\_CANCER  
183 KEGG\_VASOPRESSIN\_REGULATED\_WATER\_REABSORPTION  
184 KEGG\_HEDGEHOG\_SIGNALING\_PATHWAY  
185 KEGG\_BASAL\_CELL\_CARCINOMA
