# Supplementary material for: Targeting serine hydroxymethyltransferases 1 and 2 for T-cell acute lymphoblastic leukemia therapy
Source: PubMed Central journal article supplement (PMC8807390; doi:10.1038/s41375-021-01361-8), 2021-08-02
Supplement: 41375_2021_1361_MOESM23_ESM.pdf [file 41375_2021_1361_MOESM23_ESM.pdf]

KEGG\_ONE\_CARBON\_POOL\_BY\_FOLATE

[http://www.gsea-msigdb.org/gsea/msigdb/cards/KEGG\\_ONE\\_CARBON\\_POOL\\_BY\\_FOLATE](http://www.gsea-msigdb.org/gsea/msigdb/cards/KEGG_ONE_CARBON_POOL_BY_FOLATE)

MTHFD2  
GART  
TYMS  
FTCD  
ALDH1L1  
MTHFS  
MTFMT  
AMT  
MTHFD2L  
DHFR  
SHMT1  
MTHFD1L  
MTHFD1  
MTR  
ATIC  
MTHFR  
SHMT2

KEGG\_PURINE\_METABOLISM

[http://www.gsea-msigdb.org/gsea/msigdb/cards/KEGG\\_PURINE\\_METABOLISM](http://www.gsea-msigdb.org/gsea/msigdb/cards/KEGG_PURINE_METABOLISM)

POLR2G  
NT5C2  
POLR2H  
ENPP3  
POLR2E  
POLR2F  
ENPP1  
XDH  
POLR2I  
POLR2J  
POLE3  
ADSS2  
PRPS2  
ADSL  
NME6  
POLR1D  
PNPT1  
POLR2K  
PDE11A  
POLD3  
POLR2L  
AK1  
NME1-NME2  
AK2  
AK4  
POLA2  
CANT1  
AMPD1  
AMPD3  
AMPD2  
NME4  
GUCY2D  
NME1  
ATIC  
NME2  
DGUOK  
POLR3C  
NME3  
POLR3G  
POLR3F  
PRUNE1  
ADPRM  
PDE4B  
PDE4C

KEGG\_PYRIMIDINE\_METABOLISM

[http://www.gsea-msigdb.org/gsea/msigdb/cards/KEGG\\_PYRIMIDINE\\_METABOLISM](http://www.gsea-msigdb.org/gsea/msigdb/cards/KEGG_PYRIMIDINE_METABOLISM)

NT5C2  
POLR2G  
POLR2H  
POLR2E  
POLR2F  
POLR2I  
POLR2J  
POLE3  
TYMS  
TXNRD1  
NME6  
POLR1D  
PNPT1  
POLR2K  
DHODH  
POLD3  
POLR2L  
NME1-NME2  
POLA2  
UPRT  
CANT1  
NME4  
NME1  
NME2  
NME3  
POLR3C  
POLR3G  
POLR3F  
NUDT2  
PRIM1  
PRIM2  
NME5  
POLD4  
DTYMK  
CTPS1  
POLA1  
ENTPD8  
POLE2  
POLD1  
POLD2  
POLE  
CAD  
CMPK2  
POLR1E

|         |         |
|---------|---------|
| PDE3B   | NT5C1A  |
| PDE4A   | POLR3A  |
| NUDT2   | DCTD    |
| GMPR2   | POLR2B  |
| PDE6C   | POLR2A  |
| PDE6D   | DCK     |
| PDE4D   | POLR2D  |
| PDE6A   | POLR2C  |
| PRIM1   | UCK1    |
| PRIM2   | UPB1    |
| AK5     | TXNRD2  |
| GMPR    | CMPK1   |
| NME5    | POLR3K  |
| PDE7B   | RRM2B   |
| PDE5A   | PNP     |
| POLD4   | POLR1B  |
| GUCY1A2 | UPP2    |
| FHIT    | CTPS2   |
| ADCY3   | POLR2J2 |
| ADCY2   | CDA     |
| ADCY1   | NT5M    |
| POLA1   | DUT     |
| PDE3A   | POLR3H  |
| PDE2A   | UCKL1   |
| PDE1C   | POLR2J3 |
| ADSS1   | POLR1A  |
| ADA     | POLR3B  |
| ENTPD8  | ENTPD4  |
| POLE2   | ITPA    |
| PDE8A   | POLR1C  |
| PDE9A   | POLE4   |
| PDE1B   | RRM1    |
| NUDT9   | RRM2    |
| POLD1   | POLR3D  |
| GDA     | NT5C3A  |
| POLD2   | DPYS    |
| POLE    | DPYD    |
| PDE6B   | TYMP    |
| PDE7A   | UMPS    |
| PRPS1   | UCK2    |
| POLR1E  | POLR3GL |
| PAICS   | TK1     |
| NT5C1A  | NT5E    |
| POLR2B  | TK2     |
| POLR3A  | UPP1    |
| PDE6H   | ENTPD6  |
| POLR2A  | ENTPD5  |
| PDE6G   | ENTPD3  |
| POLR2D  | ENTPD1  |
| DCK     | NT5C1B  |
| POLR2C  | NT5C    |

|         |       |
|---------|-------|
| ADCY8   | NME7  |
| ADCY9   | AK3   |
| ADCY6   | ZNRD1 |
| AK7     |       |
| ADCY7   |       |
| ADCY5   |       |
| GMPS    |       |
| ADCY10  |       |
| POLR3K  |       |
| POLR1B  |       |
| PNP     |       |
| RRM2B   |       |
| PDE1A   |       |
| POLR2J2 |       |
| HPRT1   |       |
| GART    |       |
| PAPSS1  |       |
| PAPSS2  |       |
| NT5M    |       |
| ADCY4   |       |
| IMPDH1  |       |
| IMPDH2  |       |
| POLR3H  |       |
| POLR2J3 |       |
| POLR1A  |       |
| POLR3B  |       |
| GUCY1B1 |       |
| PKLR    |       |
| GUCY2C  |       |
| ENTPD4  |       |
| PKM     |       |
| GUCY1A1 |       |
| GUK1    |       |
| GUCY2F  |       |
| ADK     |       |
| ITPA    |       |
| POLR1C  |       |
| URAD    |       |
| POLE4   |       |
| RRM1    |       |
| POLR3D  |       |
| RRM2    |       |
| NT5C3A  |       |
| PDE8B   |       |
| POLR3GL |       |
| NT5E    |       |
| NPR2    |       |
| NPR1    |       |
| PDE10A  |       |
| ENTPD6  |       |
| ENTPD2  |       |

ENTPD5  
ENTPD3  
NUDT5  
ENTPD1  
PFAS  
NT5C1B  
APRT  
PRPS1L1  
PPAT  
NME7  
NT5C  
ALLC  
ZNRD1
