# Supplementary material for: Targeting serine hydroxymethyltransferases 1 and 2 for T-cell acute lymphoblastic leukemia therapy
Source: PubMed Central journal article supplement (PMC8807390; doi:10.1038/s41375-021-01361-8), 2021-08-02
Supplement: 41375_2021_1361_MOESM26_ESM.pdf [file 41375_2021_1361_MOESM26_ESM.pdf]

**Supplementary Table 7.** Transcriptional effect induced by RZ-2994 vs. DMSO treatment at Day 1 and at Day 3 on KOPTK1 cells. This data is summarized in Figure 3 and Supplementary Figure 6.

Spreadsheet tabs

- A** Gene set enrichment for the transcriptional changes induced by RZ-2994 at Day 3 on KOPTK1 cells.
- B** Gene set enrichment for the transcriptional changes induced by RZ-2994 at Day 1 on KOPTK1 cells.
- C** Gene expression changes induced by RZ-2994 vs. DMSO at Day 3 on KOPTK1 cells.
- D** Gene expression changes induced by RZ-2994 vs. DMSO at Day 1 on KOPTK1 cells.

**Supplementary Table 7A.** Gene set enrichment for the transcriptional changes induced by RZ-2994 at Day 3 on KOPTK1 cells. MSigDB v7.0 collection, significance  $-\log_{10}(P\text{-value}+0.0001)>1$ . Effect of RZ-2994 on pathway based on Normalized Enrichment Score (NES): NES < -1.5 Repressed, NES > 1.5 Enhanced.

| #  | Gene set                                                 | Normalized Enrichment Score (NES) at Day 3 | $-\log_{10}(P\text{-value}+0.0001)$ at Day 3 | Amino Acid gene set signatures (1=yes, 0=no) | MYC gene set signatures (1=yes, 0=no) | Cell Cycle gene set signatures (1=yes, 0=no) | RZ-2994 vs. DMSO transcriptional effect on pathway at Day 3 |
|----|----------------------------------------------------------|--------------------------------------------|----------------------------------------------|----------------------------------------------|---------------------------------------|----------------------------------------------|-------------------------------------------------------------|
| 1  | MTOR_UP.N4.V1_UP                                         | -3.01                                      | 4.00                                         | 0                                            | 0                                     | 0                                            | Repressed                                                   |
| 2  | PENG_RAPAMYCIN_RESPONSE_DN                               | -2.97                                      | 4.00                                         | 0                                            | 0                                     | 0                                            | Repressed                                                   |
| 3  | PENG_LEUCINE_DEPRIVATION_DN                              | -2.93                                      | 4.00                                         | 1                                            | 0                                     | 0                                            | Repressed                                                   |
| 4  | PENG_GLYCINE_DEPRIVATION_DN                              | -2.90                                      | 4.00                                         | 1                                            | 0                                     | 0                                            | Repressed                                                   |
| 5  | HALLMARK_MTORC1_SIGNALING                                | -2.74                                      | 4.00                                         | 0                                            | 0                                     | 0                                            | Repressed                                                   |
| 6  | GO_INNER_MITOCHONDRIAL_MEMBRANE_PROTEIN_COMPLEX          | -2.73                                      | 4.00                                         | 0                                            | 0                                     | 0                                            | Repressed                                                   |
| 7  | GO_MITOCHONDRIAL_PROTEIN_COMPLEX                         | -2.73                                      | 4.00                                         | 0                                            | 0                                     | 0                                            | Repressed                                                   |
| 8  | GARY_CD5_TARGETS_DN                                      | -2.66                                      | 4.00                                         | 0                                            | 0                                     | 0                                            | Repressed                                                   |
| 9  | RHODES_UNDIFFERENTIATED_CANCER                           | -2.63                                      | 4.00                                         | 0                                            | 0                                     | 0                                            | Repressed                                                   |
| 10 | GO_RESPIRATORY_CHAIN_COMPLEX                             | -2.62                                      | 4.00                                         | 0                                            | 0                                     | 0                                            | Repressed                                                   |
| 11 | MANALO_HYPOXIA_DN                                        | -2.61                                      | 4.00                                         | 0                                            | 0                                     | 0                                            | Repressed                                                   |
| 12 | REACTOME_THE_ROLE_OF_GTS1_IN_G2_M_PROGRESSION_AFTER_G    | -2.61                                      | 4.00                                         | 0                                            | 0                                     | 1                                            | Repressed                                                   |
| 13 | TARTE_PLASMA_CELL_VS_PLASMABLAST_DN                      | -2.61                                      | 4.00                                         | 0                                            | 0                                     | 0                                            | Repressed                                                   |
| 14 | REACTOME_RESPIRATORY_ELECTRON_TRANSPORT                  | -2.60                                      | 4.00                                         | 0                                            | 0                                     | 0                                            | Repressed                                                   |
| 15 | TIEN_INTESTINE_PROBIOTICS_24HR_UP                        | -2.60                                      | 4.00                                         | 0                                            | 0                                     | 0                                            | Repressed                                                   |
| 16 | SOTIRIQU_BREAST_CANCER_GRADE_1_VS_3_UP                   | -2.59                                      | 4.00                                         | 0                                            | 0                                     | 0                                            | Repressed                                                   |
| 17 | GO_OXIDATIVE_PHOSPHORYLATION                             | -2.58                                      | 4.00                                         | 0                                            | 0                                     | 0                                            | Repressed                                                   |
| 18 | GO_ELECTRON_TRANSPORT_CHAIN                              | -2.57                                      | 4.00                                         | 0                                            | 0                                     | 0                                            | Repressed                                                   |
| 19 | MOOTHA_VOXPPOS                                           | -2.56                                      | 4.00                                         | 0                                            | 0                                     | 0                                            | Repressed                                                   |
| 20 | GO_MITOCHONDRIAL_MEMBRANE_PART                           | -2.55                                      | 4.00                                         | 0                                            | 0                                     | 0                                            | Repressed                                                   |
| 21 | GO_RESPIRATORY_ELECTRON_TRANSPORT_CHAIN                  | -2.55                                      | 4.00                                         | 0                                            | 0                                     | 0                                            | Repressed                                                   |
| 22 | WEI_MYCN_TARGETS_WITH_E_BOX                              | -2.55                                      | 4.00                                         | 0                                            | 1                                     | 0                                            | Repressed                                                   |
| 23 | KRIGE_RESPONSE_TO_TOSEDOSTAT_24HR_DN                     | -2.54                                      | 4.00                                         | 0                                            | 0                                     | 0                                            | Repressed                                                   |
| 24 | KEGG_PROTEASOME                                          | -2.50                                      | 4.00                                         | 0                                            | 0                                     | 0                                            | Repressed                                                   |
| 25 | GO_REGULATION_OF_CELLULAR_AMINO_ACID_METABOLIC_PROCESS   | -2.49                                      | 4.00                                         | 0                                            | 0                                     | 0                                            | Repressed                                                   |
| 26 | GO_RESPIRASOME                                           | -2.48                                      | 4.00                                         | 0                                            | 0                                     | 0                                            | Repressed                                                   |
| 27 | REACTOME_ACTIVATION_OF_APC_C_AND_APC_C.CDC20_MEDIATED_DE | -2.48                                      | 4.00                                         | 0                                            | 0                                     | 0                                            | Repressed                                                   |
| 28 | REACTOME_REGULATION_OF_MITOTIC_CELL_CYCLE                | -2.48                                      | 4.00                                         | 0                                            | 0                                     | 0                                            | Repressed                                                   |
| 29 | GO_ATP_SYNTHESIS_COUPLED_ELECTRON_TRANSPORT              | -2.47                                      | 4.00                                         | 0                                            | 0                                     | 0                                            | Repressed                                                   |
| 30 | GO_REGULATION_OF_CELLULAR_AMINE_METABOLIC_PROCESS        | -2.47                                      | 4.00                                         | 0                                            | 0                                     | 0                                            | Repressed                                                   |
| 31 | GO_ANAPHASE_PROMOTING_COMPLEX_DEPENDENT_CATABOLIC_PROC   | -2.46                                      | 4.00                                         | 0                                            | 0                                     | 0                                            | Repressed                                                   |
| 32 | REACTOME_APC_C.CDH1_MEDIATED_DEGRADATION_OF_CDC20_AND_C  | -2.46                                      | 4.00                                         | 0                                            | 0                                     | 0                                            | Repressed                                                   |
| 33 | REACTOME_METABOLISM_OF_POLYAMINES                        | -2.46                                      | 4.00                                         | 0                                            | 0                                     | 0                                            | Repressed                                                   |
| 34 | REACTOME_RESPIRATORY_ELECTRON_TRANSPORT_ATP_SYNTHESIS_E  | -2.46                                      | 4.00                                         | 0                                            | 0                                     | 0                                            | Repressed                                                   |
| 35 | YAO_TEMPORAL_RESPONSE_TO_PROGESTERONE_CLUSTER_11         | -2.46                                      | 4.00                                         | 0                                            | 0                                     | 0                                            | Repressed                                                   |
| 36 | HALLMARK_MYC_TARGETS_V2                                  | -2.45                                      | 4.00                                         | 0                                            | 1                                     | 0                                            | Repressed                                                   |
| 37 | REACTOME_MITOTIC_METAPHASE_AND_ANAPHASE                  | -2.45                                      | 4.00                                         | 0                                            | 0                                     | 1                                            | Repressed                                                   |
| 38 | SCHLOSSER_MYC_TARGETS_AND_SERUM_RESPONSE_DN              | -2.45                                      | 4.00                                         | 0                                            | 1                                     | 0                                            | Repressed                                                   |
| 39 | GO_TRANSLATIONAL_TERMINATION                             | -2.44                                      | 4.00                                         | 0                                            | 0                                     | 0                                            | Repressed                                                   |
| 40 | REICHERT_MITOSIS_LIN9_TARGETS                            | -2.44                                      | 4.00                                         | 0                                            | 0                                     | 1                                            | Repressed                                                   |
| 41 | GO_MITOCHONDRIAL_RESPIRATORY_CHAIN_COMPLEX_I             | -2.43                                      | 4.00                                         | 0                                            | 0                                     | 0                                            | Repressed                                                   |
| 42 | GO_OXIDOREDUCTASE_ACTIVITY_ACTING_ON_NAD_P_H_QUINONE_OR_ | -2.43                                      | 4.00                                         | 0                                            | 0                                     | 0                                            | Repressed                                                   |
| 43 | REACTOME_CROSS_PRESENTATION_OF_SOLUBLE_EXOGENOUS_ANTIG   | -2.43                                      | 4.00                                         | 0                                            | 0                                     | 0                                            | Repressed                                                   |
| 44 | REACTOME_TRNA_AMINOACYLATION                             | -2.43                                      | 4.00                                         | 0                                            | 0                                     | 0                                            | Repressed                                                   |
| 45 | SHIPP_DLCL_VS_FOLLICULAR_LYMPHOMA_UP                     | -2.43                                      | 4.00                                         | 0                                            | 0                                     | 0                                            | Repressed                                                   |
| 46 | GO_MITOCHONDRIAL_ELECTRON_TRANSPORT_NADH_TO_UBIQUINONE   | -2.42                                      | 4.00                                         | 0                                            | 0                                     | 0                                            | Repressed                                                   |
| 47 | GO_MITOCHONDRIAL_RESPIRATORY_CHAIN_COMPLEX_ASSEMBLY      | -2.42                                      | 4.00                                         | 0                                            | 0                                     | 0                                            | Repressed                                                   |
| 48 | GO_NADH_DEHYDROGENASE_ACTIVITY                           | -2.42                                      | 4.00                                         | 0                                            | 0                                     | 0                                            | Repressed                                                   |
| 49 | KRIGE_RESPONSE_TO_TOSEDOSTAT_6HR_DN                      | -2.42                                      | 4.00                                         | 0                                            | 0                                     | 0                                            | Repressed                                                   |
| 50 | REACTOME_COMPLEX_I_BIOGENESIS                            | -2.42                                      | 4.00                                         | 0                                            | 0                                     | 0                                            | Repressed                                                   |
| 51 | REACTOME_DEGRADATION_OF_GLI1_BY_THE_PROTEASOME           | -2.41                                      | 4.00                                         | 0                                            | 0                                     | 0                                            | Repressed                                                   |
| 52 | REACTOME_SIGNALING_BY_THE_B_CELL_RECEPTOR_BCR            | -2.41                                      | 4.00                                         | 0                                            | 0                                     | 0                                            | Repressed                                                   |
| 53 | GO_PRERIBOSOME                                           | -2.40                                      | 4.00                                         | 0                                            | 0                                     | 0                                            | Repressed                                                   |
| 54 | GO_ORGANELLAR_RIBOSOME                                   | -2.39                                      | 4.00                                         | 0                                            | 0                                     | 0                                            | Repressed                                                   |
| 55 | KARLSSON_TGFB1_TARGETS_UP                                | -2.39                                      | 4.00                                         | 0                                            | 0                                     | 0                                            | Repressed                                                   |
| 56 | REACTOME_FBXL7_DOWN_REGULATES_AURKA_DURING_MITOTIC_ENTR  | -2.39                                      | 4.00                                         | 0                                            | 0                                     | 0                                            | Repressed                                                   |
| 57 | REACTOME_HOST_INTERACTIONS_OF_HIV_FACTORS                | -2.39                                      | 4.00                                         | 0                                            | 0                                     | 0                                            | Repressed                                                   |
| 58 | GO_NADH_DEHYDROGENASE_COMPLEX_ASSEMBLY                   | -2.38                                      | 4.00                                         | 0                                            | 0                                     | 0                                            | Repressed                                                   |
| 59 | BERENJENO_TRANSFORMED_BY_RHOA_UP                         | -2.37                                      | 4.00                                         | 0                                            | 0                                     | 0                                            | Repressed                                                   |
| 60 | COLLER_MYC_TARGETS_UP                                    | -2.37                                      | 4.00                                         | 0                                            | 1                                     | 0                                            | Repressed                                                   |
| 61 | FOURNIER_ACINAR_DEVELOPMENT_LATE_2                       | -2.37                                      | 4.00                                         | 0                                            | 0                                     | 0                                            | Repressed                                                   |
| 62 | GO_ELECTRON_TRANSFER_ACTIVITY                            | -2.37                                      | 4.00                                         | 0                                            | 0                                     | 0                                            | Repressed                                                   |
| 63 | GO_MITOCHONDRIAL_GENE_EXPRESSION                         | -2.37                                      | 4.00                                         | 0                                            | 0                                     | 0                                            | Repressed                                                   |
| 64 | REACTOME_DOWNSTREAM_SIGNALING_EVENTS_OF_B_CELL_RECEPTO   | -2.36                                      | 4.00                                         | 0                                            | 0                                     | 0                                            | Repressed                                                   |
| 65 | REACTOME_MITOCHONDRIAL_TRANSLATION                       | -2.36                                      | 4.00                                         | 0                                            | 0                                     | 0                                            | Repressed                                                   |
| 66 | ELVIDGE_HYPOXIA_DN                                       | -2.35                                      | 4.00                                         | 0                                            | 0                                     | 0                                            | Repressed                                                   |
| 67 | GO_MITOCHONDRIAL_TRANSLATIONAL_TERMINATION               | -2.35                                      | 4.00                                         | 0                                            | 0                                     | 0                                            | Repressed                                                   |
| 68 | LEE_BMP2_TARGETS_DN                                      | -2.35                                      | 4.00                                         | 0                                            | 0                                     | 0                                            | Repressed                                                   |
| 69 | REACTOME_HIV_INFECTION                                   | -2.35                                      | 4.00                                         | 0                                            | 0                                     | 0                                            | Repressed                                                   |
| 70 | REACTOME_REGULATION_OF_RAS_BY_GAPS                       | -2.35                                      | 4.00                                         | 0                                            | 0                                     | 0                                            | Repressed                                                   |
| 71 | REACTOME_THE_CITRIC_ACID_TCA_CYCLE_AND_RESPIRATORY_ELECT | -2.34                                      | 4.00                                         | 0                                            | 0                                     | 0                                            | Repressed                                                   |
| 72 | SCHUHMACHER_MYC_TARGETS_UP                               | -2.34                                      | 4.00                                         | 0                                            | 1                                     | 0                                            | Repressed                                                   |
| 73 | GO_ANTIGEN_PROCESSING_AND_PRESENTATION_OF_EXOGENOUS_PEP  | -2.33                                      | 4.00                                         | 0                                            | 0                                     | 0                                            | Repressed                                                   |
| 74 | GO_ENDOPEPTIDASE_COMPLEX                                 | -2.33                                      | 4.00                                         | 0                                            | 0                                     | 0                                            | Repressed                                                   |
| 75 | HALLMARK_MYC_TARGETS_V1                                  | -2.33                                      | 4.00                                         | 0                                            | 1                                     | 0                                            | Repressed                                                   |
| 76 | REACTOME_ACTIVATION_OF_NF_KAPPAB_IN_B_CELLS              | -2.33                                      | 4.00                                         | 0                                            | 0                                     | 0                                            | Repressed                                                   |
| 77 | WONG_EMBRYONIC_STEM_CELL_CORE                            | -2.33                                      | 4.00                                         | 0                                            | 0                                     | 0                                            | Repressed                                                   |
| 78 | HALLMARK_OXIDATIVE_PHOSPHORYLATION                       | -2.32                                      | 4.00                                         | 0                                            | 0                                     | 0                                            | Repressed                                                   |
| 79 | REACTOME_VIF_MEDIATED_DEGRADATION_OF_APOBEC3G            | -2.32                                      | 4.00                                         | 0                                            | 0                                     | 0                                            | Repressed                                                   |
| 80 | GO_GENERATION_OF_PRECURSOR_METABOLITES_AND_ENERGY        | -2.31                                      | 4.00                                         | 0                                            | 0                                     | 0                                            | Repressed                                                   |
| 81 | PID_MYC_ACTIV_PATHWAY                                    | -2.31                                      | 4.00                                         | 0                                            | 1                                     | 0                                            | Repressed                                                   |
| 82 | REACTOME_REGULATION_OF_APOPTOSIS                         | -2.31                                      | 4.00                                         | 0                                            | 0                                     | 0                                            | Repressed                                                   |
| 83 | YU_MYC_TARGETS_UP                                        | -2.31                                      | 4.00                                         | 0                                            | 1                                     | 0                                            | Repressed                                                   |
| 84 | GO_CELLULAR_RESPIRATION                                  | -2.30                                      | 4.00                                         | 0                                            | 0                                     | 0                                            | Repressed                                                   |
| 85 | GO_MITOCHONDRIAL_TRANSLATION                             | -2.30                                      | 4.00                                         | 0                                            | 0                                     | 0                                            | Repressed                                                   |
| 86 | GO_PEPTIDASE_COMPLEX                                     | -2.30                                      | 4.00                                         | 0                                            | 0                                     | 0                                            | Repressed                                                   |
| 87 | NAKAMURA_CANCER_MICROENVIRONMENT_DN                      | -2.30                                      | 4.00                                         | 0                                            | 0                                     | 0                                            | Repressed                                                   |
| 88 | NAKAYAMA_SOFT_TISSUE_TUMORS_PCA2_UP                      | -2.30                                      | 4.00                                         | 0                                            | 0                                     | 0                                            | Repressed                                                   |
| 89 | REACTOME_REGULATION_OF_RUNX2_EXPRESSION_AND_ACTIVITY     | -2.30                                      | 4.00                                         | 0                                            | 0                                     | 0                                            | Repressed                                                   |
| 90 | REACTOME_RNA_MODIFICATION_IN_THE_NUCLEUS_AND_CYTOSOL     | -2.30                                      | 4.00                                         | 0                                            | 0                                     | 0                                            | Repressed                                                   |
| 91 | ROSTY_CERVICAL_CANCER_PROLIFERATION_CLUSTER              | -2.30                                      | 4.00                                         | 0                                            | 0                                     | 0                                            | Repressed                                                   |
| 92 | TANG_SENESCENCE_TP53_TARGETS_DN                          | -2.30                                      | 4.00                                         | 0                                            | 0                                     | 0                                            | Repressed                                                   |
| 93 | WINTER_HYPOXIA_UP                                        | -2.30                                      | 4.00                                         | 0                                            | 0                                     | 0                                            | Repressed                                                   |
| 94 | REACTOME_CYTOSOLIC_TRNA_AMINOACYLATION                   | -2.29                                      | 4.00                                         | 0                                            | 0                                     | 0                                            | Repressed                                                   |
| 95 | REACTOME_NEGATIVE_REGULATION_OF_NOTCH4_SIGNALING         | -2.29                                      | 4.00                                         | 0                                            | 0                                     | 0                                            | Repressed                                                   |
| 96 | SHEDDEN_LUNG_CANCER_POOR_SURVIVAL_A6                     | -2.29                                      | 4.00                                         | 0                                            | 0                                     | 0                                            | Repressed                                                   |
| 97 | BASAKI_YBX1_TARGETS_UP                                   | -2.28                                      | 4.00                                         | 0                                            | 0                                     | 0                                            | Repressed                                                   |

|     |                                                           |       |      |   |   |   |           |
|-----|-----------------------------------------------------------|-------|------|---|---|---|-----------|
| 98  | GO_PROTEASOME_ACCESSORY_COMPLEX                           | -2.28 | 4.00 | 0 | 0 | 0 | Repressed |
| 99  | RAHMAN_TP53_TARGETS_PHOSPHORYLATED                        | -2.28 | 4.00 | 0 | 0 | 0 | Repressed |
| 100 | GO_TRNA_METABOLIC_PROCESS                                 | -2.27 | 4.00 | 1 | 0 | 0 | Repressed |
| 101 | GO_ANTIGEN_PROCESSING_AND_PRESENTATION_OF_PEPTIDE_ANTIGEN | -2.26 | 4.00 | 0 | 0 | 0 | Repressed |
| 102 | GO_MITOCHONDRIAL_MATRIX                                   | -2.26 | 4.00 | 0 | 0 | 0 | Repressed |
| 103 | GO_MITOCHONDRIAL_PART                                     | -2.26 | 4.00 | 0 | 0 | 0 | Repressed |
| 104 | GO_OXIDOREDUCTASE_COMPLEX                                 | -2.26 | 4.00 | 0 | 0 | 0 | Repressed |
| 105 | KEGG_AMINOACYL_TRNA_BIOSYNTHESIS                          | -2.26 | 4.00 | 1 | 0 | 0 | Repressed |
| 106 | MOOHTA_HUMAN_MITOCHONDRIA_6_2002                          | -2.26 | 4.00 | 0 | 0 | 0 | Repressed |
| 107 | GO_OXIDOREDUCTASE_ACTIVITY_ACTING_ON_NAD_P_H              | -2.25 | 4.00 | 0 | 0 | 0 | Repressed |
| 108 | GRAHAM_CML_DIVIDING_VS_NORMAL_QUIESCENT_UP                | -2.25 | 4.00 | 0 | 0 | 0 | Repressed |
| 109 | REACTOME_REGULATION_OF_RUNX3_EXPRESSION_AND_ACTIVITY      | -2.25 | 4.00 | 0 | 0 | 0 | Repressed |
| 110 | WONG_MITOCHONDRIA_GENE_MODULE                             | -2.25 | 4.00 | 0 | 0 | 0 | Repressed |
| 111 | GO_CATALYTIC_ACTIVITY_ACTING_ON_A_TRNA                    | -2.24 | 4.00 | 0 | 0 | 0 | Repressed |
| 112 | GO_SMALL_NUCLEOLAR_RIBONUCLEOPROTEIN_COMPLEX              | -2.24 | 4.00 | 0 | 0 | 0 | Repressed |
| 113 | LY_AGING_OLD_DN                                           | -2.24 | 4.00 | 0 | 0 | 0 | Repressed |
| 114 | SEMENZA_HIF1_TARGETS                                      | -2.24 | 4.00 | 0 | 0 | 0 | Repressed |
| 115 | YAO_TEMPORAL_RESPONSE_TO_PROGESTERONE_CLUSTER_13          | -2.24 | 4.00 | 0 | 0 | 0 | Repressed |
| 116 | GO_SMALL_SUBUNIT_PROCESSOME                               | -2.23 | 4.00 | 0 | 0 | 0 | Repressed |
| 117 | KEGG_OXIDATIVE_PHOSPHORYLATION                            | -2.23 | 4.00 | 0 | 0 | 0 | Repressed |
| 118 | MORI_LARGE_PRE_BII_LYMPHOCTE_UP                           | -2.23 | 4.00 | 0 | 0 | 0 | Repressed |
| 119 | PWJANA_CHEK2_NETWORK                                      | -2.23 | 4.00 | 0 | 0 | 1 | Repressed |
| 120 | REACTOME_CELLULAR_RESPONSE_TO_HYPOXIA                     | -2.23 | 4.00 | 0 | 0 | 0 | Repressed |
| 121 | ZHOU_CELL_CYCLE_GENES_IN_IR_RESPONSE_24HR                 | -2.23 | 4.00 | 0 | 0 | 1 | Repressed |
| 122 | GO_REGULATION_OF_TRANSCRIPTION_FROM_RNA_POLYMERASE_II_PR  | -2.22 | 4.00 | 0 | 0 | 0 | Repressed |
| 123 | MENSEN_MYC_TARGETS                                        | -2.22 | 4.00 | 0 | 1 | 0 | Repressed |
| 124 | ODONNELL_TARGETS_OF_MYC_AND_TFRC_DN                       | -2.22 | 4.00 | 0 | 0 | 0 | Repressed |
| 125 | REACTOME_DOWNSTREAM_TCR_SIGNALING                         | -2.22 | 4.00 | 0 | 0 | 0 | Repressed |
| 126 | GO_ORGANELLAR_LARGE_RIBOSOMAL_SUBUNIT                     | -2.21 | 4.00 | 0 | 0 | 0 | Repressed |
| 127 | ONO_FOXP3_TARGETS_UP                                      | -2.21 | 4.00 | 0 | 0 | 0 | Repressed |
| 128 | REACTOME_DEGRADATION_OF_AXIN                              | -2.21 | 4.00 | 0 | 0 | 0 | Repressed |
| 129 | ZHAN_MULTIPLE_MYELOMA_CD11_VS_CD2_UP                      | -2.21 | 4.00 | 0 | 0 | 0 | Repressed |
| 130 | ELVIDGE_HIF1A_TARGETS_UP                                  | -2.20 | 4.00 | 0 | 0 | 0 | Repressed |
| 131 | GO_MITOCHONDRIAL_ENVELOPE                                 | -2.20 | 4.00 | 0 | 0 | 0 | Repressed |
| 132 | REACTOME_AUF1_HNRNP_D0_BINDS_AND_DESTABILIZES_MRNA        | -2.19 | 4.00 | 0 | 0 | 0 | Repressed |
| 133 | WINNENPENINCKX_MELANOMA_METASTASIS_UP                     | -2.19 | 4.00 | 0 | 0 | 0 | Repressed |
| 134 | FISCHER_G2_M_CELL_CYCLE                                   | -2.18 | 4.00 | 0 | 0 | 1 | Repressed |
| 135 | KANG_GIST_WITH_PDGFR_A_UP                                 | -2.18 | 4.00 | 0 | 0 | 0 | Repressed |
| 136 | REACTOME_DECTIN_1_MEDIATED_NONCANONICAL_NF_KB_SIGNALING   | -2.18 | 4.00 | 0 | 0 | 0 | Repressed |
| 137 | REACTOME_DEGRADATION_OF_DVL                               | -2.18 | 4.00 | 0 | 0 | 0 | Repressed |
| 138 | REACTOME_GLUCCOSE_METABOLISM                              | -2.18 | 4.00 | 0 | 0 | 0 | Repressed |
| 139 | BOYVAULT_LIVER_CANCER_SUBCLASS_G23_UP                     | -2.17 | 4.00 | 0 | 0 | 0 | Repressed |
| 140 | ELVIDGE_HYPOXIA_BY_DMOG_DN                                | -2.17 | 4.00 | 0 | 0 | 0 | Repressed |
| 141 | GAVIN_FOXP3_TARGETS_CLUSTER_P6                            | -2.17 | 4.00 | 0 | 0 | 0 | Repressed |
| 142 | GO_90S_PRRIBOSOME                                         | -2.17 | 4.00 | 0 | 0 | 0 | Repressed |
| 143 | REACTOME_ASYMMETRIC_LOCALIZATION_OF_PCP_PROTEINS          | -2.17 | 4.00 | 0 | 0 | 0 | Repressed |
| 144 | CROONQUIST_IL6_DEPRIVATION_DN                             | -2.16 | 4.00 | 0 | 0 | 0 | Repressed |
| 145 | FARMER_BREAST_CANCER_CLUSTER_2                            | -2.16 | 4.00 | 0 | 0 | 0 | Repressed |
| 146 | GO_AMINO_ACID_ACTIVATION                                  | -2.16 | 4.00 | 0 | 0 | 0 | Repressed |
| 147 | KIM_MYC_AMPLIFICATION_TARGETS_UP                          | -2.16 | 4.00 | 0 | 1 | 0 | Repressed |
| 148 | CHANG_CORE_SERUM_RESPONSE_UP                              | -2.15 | 4.00 | 0 | 0 | 0 | Repressed |
| 149 | GO_RNA_LOCALIZATION                                       | -2.15 | 4.00 | 0 | 0 | 0 | Repressed |
| 150 | GO_TRNA_METHYLATION                                       | -2.15 | 4.00 | 0 | 0 | 0 | Repressed |
| 151 | ODONNELL_TFRC_TARGETS_DN                                  | -2.15 | 4.00 | 0 | 0 | 0 | Repressed |
| 152 | REACTOME_CDK_MEDIATED_PHOSPHORYLATION_AND_REMOVAL_OF_C    | -2.15 | 4.00 | 0 | 0 | 0 | Repressed |
| 153 | REACTOME_GLYCOLYSIS                                       | -2.15 | 4.00 | 0 | 0 | 0 | Repressed |
| 154 | REACTOME_TRNA_PROCESSING                                  | -2.15 | 4.00 | 0 | 0 | 0 | Repressed |
| 155 | WILLIAMS_ESR1_TARGETS_UP                                  | -2.15 | 4.00 | 0 | 0 | 0 | Repressed |
| 156 | BASSO_B_LYMPHOCTE_NETWORK                                 | -2.14 | 4.00 | 0 | 0 | 0 | Repressed |
| 157 | CASORELLI_ACUTE_PROMYELOCTIC_LEUKEMIA_DN                  | -2.14 | 4.00 | 0 | 0 | 0 | Repressed |
| 158 | GO_CYTOKINE_RECEPTOR_ACTIVITY                             | -2.14 | 4.00 | 0 | 0 | 0 | Repressed |
| 159 | GO_NCRNA_METABOLIC_PROCESS                                | -2.14 | 4.00 | 0 | 0 | 0 | Repressed |
| 160 | KRIGE_AMINO_ACID_DEPRIVATION                              | -2.14 | 4.00 | 0 | 0 | 0 | Repressed |
| 161 | MOOHTA_GLUCCONEOGENESIS                                   | -2.14 | 4.00 | 0 | 0 | 0 | Repressed |
| 162 | RODRIGUES_THYROID_CARCCINOMA_POORLY_DIFFERENTIATED_UP     | -2.14 | 4.00 | 0 | 0 | 0 | Repressed |
| 163 | GO_NCRNA_PROCESSING                                       | -2.13 | 4.00 | 0 | 0 | 0 | Repressed |
| 164 | KEGG_GLYCOLYSIS_GLUCCONEOGENESIS                          | -2.13 | 4.00 | 0 | 0 | 0 | Repressed |
| 165 | NAKAMURA_TUMOR_ZONE_PERIPHERAL_VS_CENTRAL_UP              | -2.13 | 4.00 | 0 | 0 | 0 | Repressed |
| 166 | GO_ANAPHASE_PROMOTING_COMPLEX_BINDING                     | -2.12 | 4.00 | 0 | 0 | 0 | Repressed |
| 167 | HALLMARK_UNFOLDED_PROTEIN_RESPONSE                        | -2.12 | 4.00 | 0 | 0 | 0 | Repressed |
| 168 | BURTON_ADIPOGENESIS_PEAK_AT_24HR                          | -2.11 | 4.00 | 0 | 0 | 0 | Repressed |
| 169 | GO_ORGANELLE_INNER_MEMBRANE                               | -2.11 | 4.00 | 0 | 0 | 0 | Repressed |
| 170 | GO_TRNA_METHYLTRANSFERASE_ACTIVITY                        | -2.11 | 4.00 | 0 | 0 | 0 | Repressed |
| 171 | MUELLER_PLURINET                                          | -2.11 | 4.00 | 0 | 0 | 0 | Repressed |
| 172 | REACTOME_FCFR1_MEDIATED_NF_KB_ACTIVATION                  | -2.11 | 4.00 | 0 | 0 | 0 | Repressed |
| 173 | REACTOME_SCF_SKP2_MEDIATED_DEGRADATION_OF_P27_P21         | -2.11 | 4.00 | 0 | 0 | 0 | Repressed |
| 174 | REACTOME_TCR_SIGNALING                                    | -2.11 | 4.00 | 0 | 0 | 0 | Repressed |
| 175 | REACTOME_UCH_PROTEINASES                                  | -2.11 | 4.00 | 0 | 0 | 0 | Repressed |
| 176 | AMUNDSON_GAMMA_RADIATION_RESPONSE                         | -2.10 | 4.00 | 0 | 0 | 0 | Repressed |
| 177 | GO_CELLULAR_PROTEIN_COMPLEX_DISASSEMBLY                   | -2.10 | 4.00 | 0 | 0 | 0 | Repressed |
| 178 | GO_LIGASE_ACTIVITY_FORMING_CARBON_OXYGEN_BONDS            | -2.10 | 4.00 | 0 | 0 | 0 | Repressed |
| 179 | GO_RNA_MODIFICATION                                       | -2.10 | 4.00 | 0 | 0 | 0 | Repressed |
| 180 | REACTOME_MAPK6_MAPK4_SIGNALING                            | -2.10 | 4.00 | 0 | 0 | 0 | Repressed |
| 181 | WEST_ADRENOCTHICAL_TUMOR_UP                               | -2.10 | 4.00 | 0 | 0 | 0 | Repressed |
| 182 | GO_INTRINSIC_COMPONENT_OF_MITOCHONDRIAL_INNER_MEMBRANE    | -2.09 | 4.00 | 0 | 0 | 0 | Repressed |
| 183 | GO_REGULATION_OF_DNA_TEMPLATED_TRANSCRIPTION_IN_RESPONSE  | -2.09 | 4.00 | 0 | 0 | 0 | Repressed |
| 184 | HOFFMANN_LARGE_TO_SMALL_PRE_BII_LYMPHOCTE_UP              | -2.09 | 4.00 | 0 | 0 | 0 | Repressed |
| 185 | KEGG_FRUCTOSE_AND_MANNOSSE_METABOLISM                     | -2.09 | 4.00 | 0 | 0 | 0 | Repressed |
| 186 | MOOHTA_MITOCHONDRIA                                       | -2.09 | 4.00 | 0 | 0 | 0 | Repressed |
| 187 | MOREAUX_B_LYMPHOCTE_MATURATION_BY_TACI_DN                 | -2.09 | 4.00 | 0 | 0 | 0 | Repressed |
| 188 | REACTOME_FORMATION_OF_TUBULIN_FOLDING_INTERMEDIATES_BY_C  | -2.09 | 4.00 | 0 | 0 | 0 | Repressed |
| 189 | SIMBULAN_PARP1_TARGETS_DN                                 | -2.09 | 4.00 | 0 | 0 | 0 | Repressed |
| 190 | VECCHI_GASTRIC_CANCER_EARLY_UP                            | -2.09 | 4.00 | 0 | 0 | 0 | Repressed |
| 191 | GO_AMINE_METABOLIC_PROCESS                                | -2.08 | 4.00 | 0 | 0 | 0 | Repressed |
| 192 | GO_CELLULAR_AMINO_ACID_METABOLIC_PROCESS                  | -2.08 | 4.00 | 0 | 0 | 0 | Repressed |
| 193 | GO_CYTOCHROME_COMPLEX                                     | -2.08 | 4.00 | 0 | 0 | 0 | Repressed |
| 194 | KEGG_PARKINSONS_DISEASE                                   | -2.08 | 4.00 | 0 | 0 | 0 | Repressed |
| 195 | KORKOLA_TERATOMA                                          | -2.08 | 4.00 | 0 | 0 | 0 | Repressed |
| 196 | LI_DCP2_BOUND_MRNA                                        | -2.08 | 4.00 | 0 | 0 | 0 | Repressed |
| 197 | MOOHTA_PGC                                                | -2.08 | 4.00 | 0 | 0 | 0 | Repressed |
| 198 | REACTOME_ANTIGEN_PROCESSING_CROSS_PRESENTATION            | -2.08 | 4.00 | 0 | 0 | 0 | Repressed |
| 199 | SCHLOSSER_MYC_TARGETS_REPRESSED_BY_SERUM                  | -2.08 | 4.00 | 0 | 1 | 0 | Repressed |
| 200 | YAO_TEMPORAL_RESPONSE_TO_PROGESTERONE_CLUSTER_14          | -2.08 | 4.00 | 0 | 0 | 0 | Repressed |
| 201 | BURTON_ADIPOGENESIS_5                                     | -2.07 | 4.00 | 0 | 0 | 0 | Repressed |
| 202 | GO_ENERGY_DERIVATION_BY_OXIDATION_OF_ORGANIC_COMPOUNDS    | -2.07 | 4.00 | 0 | 0 | 0 | Repressed |
| 203 | GO_INNATE_IMMUNE_RESPONSE_ACTIVATING_CELL_SURFACE_RECEPT  | -2.07 | 4.00 | 0 | 0 | 0 | Repressed |
| 204 | GO_MITOCHONDRION                                          | -2.07 | 4.00 | 0 | 0 | 0 | Repressed |
| 205 | HONMA_DOCETAXEL_RESISTANCE                                | -2.07 | 4.00 | 0 | 0 | 0 | Repressed |
| 206 | REACTOME_BETA_CATENIN_INDEPENDENT_WNT_SIGNALING           | -2.07 | 4.00 | 0 | 0 | 0 | Repressed |

|     |                                                             |       |      |   |   |   |           |
|-----|-------------------------------------------------------------|-------|------|---|---|---|-----------|
| 207 | REACTOME_HEDGEHOG_LIGAND_BIOGENESIS                         | -2.07 | 4.00 | 0 | 0 | 0 | Repressed |
| 208 | REACTOME_PCP_CE_PATHWAY                                     | -2.07 | 4.00 | 0 | 0 | 0 | Repressed |
| 209 | REACTOME_STABILIZATION_OF_P53                               | -2.07 | 4.00 | 0 | 0 | 0 | Repressed |
| 210 | XU_RESPONSE_TO_TRETINOIN_AND_NSC682994_DN                   | -2.07 | 2.60 | 0 | 0 | 0 | Repressed |
| 211 | BIOCARTA_IL12_PATHWAY                                       | -2.06 | 4.00 | 0 | 0 | 0 | Repressed |
| 212 | BMI1_DNV1_DN                                                | -2.06 | 4.00 | 0 | 0 | 0 | Repressed |
| 213 | CONCANNON_APOPTOSIS_BY_EPOXOMICIN_DN                        | -2.06 | 4.00 | 0 | 0 | 0 | Repressed |
| 214 | CSR_EARLY_UP.V1_UP                                          | -2.06 | 4.00 | 0 | 0 | 0 | Repressed |
| 215 | GO_ESTABLISHMENT_OF_RNA_LOCALIZATION                        | -2.06 | 4.00 | 0 | 0 | 0 | Repressed |
| 216 | GO_REGULATION_OF_CARDIAC_CONDUCTION                         | -2.06 | 4.00 | 0 | 0 | 0 | Repressed |
| 217 | GO_TRNA_MODIFICATION                                        | -2.06 | 4.00 | 0 | 0 | 0 | Repressed |
| 218 | REACTOME_SIGNALING_BY_NOTCH4                                | -2.06 | 4.00 | 0 | 0 | 0 | Repressed |
| 219 | SERVITJA_LIVER_HNF1A_TARGETS_UP                             | -2.06 | 4.00 | 0 | 0 | 0 | Repressed |
| 220 | SHAFFER_IRF4_TARGETS_IN_ACTIVATED_B_LYMPHOCYTE              | -2.06 | 4.00 | 0 | 0 | 0 | Repressed |
| 221 | GO_INTRINSIC_COMPONENT_OF_MITOCHONDRIAL_MEMBRANE            | -2.05 | 4.00 | 0 | 0 | 0 | Repressed |
| 222 | GO_REGULATION_OF_CELLULAR_KEATONE_METABOLIC_PROCESS         | -2.05 | 4.00 | 0 | 0 | 0 | Repressed |
| 223 | HESS_TARGETS_OF_HOXA9_AND_MEIS1_UP                          | -2.05 | 4.00 | 0 | 0 | 0 | Repressed |
| 224 | REACTOME_DEGRADATION_OF_BETA_CATENIN_BY_THE_DESTRUCTION     | -2.05 | 4.00 | 0 | 0 | 0 | Repressed |
| 225 | REACTOME_HEDGEHOG_OFF_STATE                                 | -2.05 | 4.00 | 0 | 0 | 0 | Repressed |
| 226 | REACTOME_RESOLUTION_OF_SISTER_CHROMATID_COHESION            | -2.05 | 4.00 | 0 | 0 | 0 | Repressed |
| 227 | GO_TRNA_PROCESSING                                          | -2.04 | 4.00 | 0 | 0 | 0 | Repressed |
| 228 | HALLMARK_G2M_CHECKPOINT                                     | -2.04 | 4.00 | 0 | 0 | 1 | Repressed |
| 229 | KEGG_ALZHEIMERS_DISEASE                                     | -2.04 | 4.00 | 0 | 0 | 0 | Repressed |
| 230 | KOBAYASHI_EGFR_SIGNALING_24HR_DN                            | -2.04 | 4.00 | 0 | 0 | 0 | Repressed |
| 231 | MOOTHA_GLYCOLYSIS                                           | -2.04 | 4.00 | 0 | 0 | 0 | Repressed |
| 232 | OUELLET_OVARIAN_CANCER_INVASIVE_VS_LMP_UP                   | -2.04 | 4.00 | 0 | 0 | 0 | Repressed |
| 233 | REACTOME_MITOCHONDRIAL_PROTEIN_IMPORT                       | -2.04 | 4.00 | 0 | 0 | 0 | Repressed |
| 234 | RODRIGUES_THYROID_CARCIOMA_ANAPLASTIC_UP                    | -2.04 | 4.00 | 0 | 0 | 0 | Repressed |
| 235 | CHR17Q24                                                    | -2.03 | 4.00 | 0 | 0 | 0 | Repressed |
| 236 | GO_ANTIGEN_PROCESSING_AND_PRESENTATION_OF_PEPTIDE_ANTIGENI  | -2.03 | 4.00 | 0 | 0 | 0 | Repressed |
| 237 | GO_POSITIVE_REGULATION_OF_TELOMERASE_RNA_LOCALIZATION_TO    | -2.03 | 4.00 | 0 | 0 | 0 | Repressed |
| 238 | REACTOME_ABC_TRANSPORTER_DISORDERS                          | -2.03 | 4.00 | 0 | 0 | 0 | Repressed |
| 239 | RHODES_CANCER_META_SIGNATURE                                | -2.03 | 4.00 | 0 | 0 | 0 | Repressed |
| 240 | SCHLOSSER_MYC_AND_SERUM_RESPONSE_SYNERGY                    | -2.03 | 4.00 | 0 | 1 | 0 | Repressed |
| 241 | TOOKER_GEMCITABINE_RESISTANCE_DN                            | -2.03 | 4.00 | 0 | 0 | 0 | Repressed |
| 242 | WINTER_HYPOXIA_METAGENE                                     | -2.03 | 4.00 | 0 | 0 | 0 | Repressed |
| 243 | CHEN_LUNG_CANCER_SURVIVAL                                   | -2.02 | 4.00 | 0 | 0 | 0 | Repressed |
| 244 | FLORIO_NEOCORTEX_BASAL_RADIAL_GLIA_DN                       | -2.02 | 4.00 | 0 | 0 | 0 | Repressed |
| 245 | GO_CELLULAR_KEATONE_METABOLIC_PROCESS                       | -2.02 | 4.00 | 0 | 0 | 0 | Repressed |
| 246 | GO_NEUTROPHIL_HOMEOSTASIS                                   | -2.02 | 4.00 | 0 | 0 | 0 | Repressed |
| 247 | GO_SNORNA_BINDING                                           | -2.02 | 4.00 | 0 | 0 | 0 | Repressed |
| 248 | REACTOME_CELL_CYCLE_CHECKPOINTS                             | -2.02 | 4.00 | 0 | 0 | 1 | Repressed |
| 249 | REACTOME_METABOLISM_OF_NON_CODING_RNA                       | -2.02 | 4.00 | 0 | 0 | 0 | Repressed |
| 250 | SCAN_CELL_CYCLE_TARGETS_OF_TP53_AND_TP73_DN                 | -2.02 | 4.00 | 0 | 0 | 0 | Repressed |
| 251 | WANG_SMARCE1_TARGETS_DN                                     | -2.02 | 4.00 | 0 | 0 | 0 | Repressed |
| 252 | FOURNIER_ACINAR_DEVELOPMENT_LATE_DN                         | -2.02 | 2.62 | 0 | 0 | 0 | Repressed |
| 253 | GO_RNA_METHYLTRANSFERASE_ACTIVITY                           | -2.01 | 4.00 | 0 | 0 | 0 | Repressed |
| 254 | RB_P107_DN.V1_DN                                            | -2.01 | 4.00 | 0 | 0 | 0 | Repressed |
| 255 | REACTOME_HIV_LIFE_CYCLE                                     | -2.01 | 4.00 | 0 | 0 | 0 | Repressed |
| 256 | REACTOME_REGULATION_OF_PTEN_STABILITY_AND_ACTIVITY          | -2.01 | 4.00 | 0 | 0 | 0 | Repressed |
| 257 | GO_REACTIVE_OXYGEN_SPECIES_METABOLIC_PROCESS                | -2.00 | 4.00 | 0 | 0 | 0 | Repressed |
| 258 | GO_REGULATION_OF_RIBOSOME_BIOGENESIS                        | -2.00 | 4.00 | 0 | 0 | 0 | Repressed |
| 259 | GO_RIBOSOME_BIOGENESIS                                      | -2.00 | 4.00 | 0 | 0 | 0 | Repressed |
| 260 | KEGG_HUNTINGTONS_DISEASE                                    | -2.00 | 4.00 | 0 | 0 | 0 | Repressed |
| 261 | MALONEY_RESPONSE_TO_17AAG_DN                                | -2.00 | 4.00 | 0 | 0 | 0 | Repressed |
| 262 | REACTOME_COOPERATION_OF_PREFOLDIN_AND_TRIC_CCT_IN_ACTIN     | -2.00 | 4.00 | 0 | 0 | 0 | Repressed |
| 263 | REACTOME_PREFOLDIN_MEDIATED_TRANSFER_OF_SUBSTRATE_TO_CI     | -2.00 | 4.00 | 0 | 0 | 0 | Repressed |
| 264 | YAO_TEMPORAL_RESPONSE_TO_PROGESTERONE_CLUSTER_17            | -2.00 | 4.00 | 0 | 0 | 0 | Repressed |
| 265 | GO_GLYCOLYTIC_PROCESS_THROUGH_FRUCTOSE_6_PHOSPHATE          | -1.99 | 4.00 | 0 | 0 | 0 | Repressed |
| 266 | GO_SCF_DEPENDENT_PROTEASOMAL_UBIQUITIN_DEPENDENT_PROTEIN    | -1.99 | 4.00 | 0 | 0 | 0 | Repressed |
| 267 | GOLDRATH_ANTIGEN_RESPONSE                                   | -1.99 | 4.00 | 0 | 0 | 0 | Repressed |
| 268 | NABA_ECM_AFFILIATED                                         | -1.99 | 4.00 | 0 | 0 | 0 | Repressed |
| 269 | REACTOME_HEDGEHOG_ON_STATE                                  | -1.99 | 4.00 | 0 | 0 | 0 | Repressed |
| 270 | REACTOME_HSP90_CHAPERONE_CYCLE_FOR_STEROID_HORMONE_REI      | -1.99 | 4.00 | 0 | 0 | 0 | Repressed |
| 271 | REACTOME_M_PHASE                                            | -1.99 | 4.00 | 0 | 0 | 1 | Repressed |
| 272 | REACTOME_METABOLISM_OF_COFACTORS                            | -1.99 | 4.00 | 0 | 0 | 0 | Repressed |
| 273 | REACTOME_TRANSCRIPTIONAL_REGULATION_BY_RUNX2                | -1.99 | 4.00 | 0 | 0 | 0 | Repressed |
| 274 | REACTOME_TRANSCRIPTIONAL_REGULATION_BY_RUNX3                | -1.99 | 4.00 | 0 | 0 | 0 | Repressed |
| 275 | WANG_ADIPOGENIC_GENES_REPRESSED_BY_SIRT1                    | -1.99 | 4.00 | 0 | 0 | 0 | Repressed |
| 276 | KEGG_PROXIMAL_TUBULE_BICARBONATE_RECLAMATION                | -1.99 | 2.63 | 0 | 0 | 0 | Repressed |
| 277 | GO_RNA_EXPORT_FROM_NUCLEUS                                  | -1.98 | 4.00 | 0 | 0 | 0 | Repressed |
| 278 | REACTOME_RNA_POLYMERASE_II_TRANSCRIPTION_PRE_INITIATION_ANI | -1.98 | 4.00 | 0 | 0 | 0 | Repressed |
| 279 | REACTOME_TNFR2_NON_CANONICAL_NF_KB_PATHWAY                  | -1.98 | 4.00 | 0 | 0 | 0 | Repressed |
| 280 | REACTOME_TRANSCRIPTION_OF_THE_HIV_GENOME                    | -1.98 | 4.00 | 0 | 0 | 0 | Repressed |
| 281 | WANG_TUMOR_INVASIVENESS_UP                                  | -1.98 | 4.00 | 0 | 0 | 0 | Repressed |
| 282 | YAO_TEMPORAL_RESPONSE_TO_PROGESTERONE_CLUSTER_10            | -1.98 | 4.00 | 0 | 0 | 0 | Repressed |
| 283 | BHATI_G2M_ARREST_BY_2METHOXYESTRADIOL_UP                    | -1.97 | 4.00 | 0 | 0 | 0 | Repressed |
| 284 | GO_SARCOPLASMIC_RETICULUM_CALCIIUM_ION_TRANSPORT            | -1.97 | 4.00 | 0 | 0 | 0 | Repressed |
| 285 | GO_TRNA_GUANINE_METHYLTRANSFERASE_ACTIVITY                  | -1.97 | 4.00 | 0 | 0 | 0 | Repressed |
| 286 | KEGG_PPAR_SIGNALING_PATHWAY                                 | -1.97 | 4.00 | 0 | 0 | 0 | Repressed |
| 287 | MORI_IMMATURE_B_LYMPHOCYTE_DN                               | -1.97 | 4.00 | 0 | 0 | 0 | Repressed |
| 288 | REACTOME_G_PROTEIN_MEDIATED_EVENTS                          | -1.97 | 4.00 | 0 | 0 | 0 | Repressed |
| 289 | REACTOME_GENE_AND_PROTEIN_EXPRESSION_BY_JAK_STAT_SIGNALIN   | -1.97 | 4.00 | 0 | 0 | 0 | Repressed |
| 290 | REACTOME_REGULATION_OF_MRNA_STABILITY_BY_PROTEINS_THAT_BI   | -1.97 | 4.00 | 0 | 0 | 0 | Repressed |
| 291 | BOYALULT_LIVER_CANCER_SUBCLASS_G3_UP                        | -1.96 | 4.00 | 0 | 0 | 0 | Repressed |
| 292 | CHAUHAN_RESPONSE_TO_METHOXYESTRADIOL_UP                     | -1.96 | 4.00 | 0 | 0 | 0 | Repressed |
| 293 | GO_CYTOSOLIC_PROTEASOME_COMPLEX                             | -1.96 | 4.00 | 0 | 0 | 0 | Repressed |
| 294 | GO_TRANSLATIONAL_ELONGATION                                 | -1.96 | 4.00 | 0 | 0 | 0 | Repressed |
| 295 | GO_TRNA_BINDING                                             | -1.96 | 4.00 | 0 | 0 | 0 | Repressed |
| 296 | GRUETZMANN_PANCREATIC_CANCER_UP                             | -1.96 | 4.00 | 0 | 0 | 0 | Repressed |
| 297 | HORIUCHI_WTAP_TARGETS_DN                                    | -1.96 | 4.00 | 0 | 0 | 0 | Repressed |
| 298 | LY_AGING_MIDDLE_DN                                          | -1.96 | 4.00 | 0 | 0 | 0 | Repressed |
| 299 | REACTOME_MITOTIC_G2_G2_M_PHASES                             | -1.96 | 4.00 | 0 | 0 | 1 | Repressed |
| 300 | REACTOME_MITOTIC_SPINDLE_CHECKPOINT                         | -1.96 | 4.00 | 0 | 0 | 1 | Repressed |
| 301 | REACTOME_ORC1_REMOVAL_FROM_CHROMATIN                        | -1.96 | 4.00 | 0 | 0 | 0 | Repressed |
| 302 | REACTOME_REGULATION_OF_CHOLESTEROL_BIOSYNTHESIS_BY_SREB     | -1.96 | 4.00 | 0 | 0 | 0 | Repressed |
| 303 | REACTOME_SUMOYLATION_OF_DNA_REPLICATION_PROTEINS            | -1.96 | 4.00 | 0 | 0 | 0 | Repressed |
| 304 | SHETH_LIVER_CANCER_VS_TXNIP_LOSS_PAM3                       | -1.96 | 4.00 | 0 | 0 | 0 | Repressed |
| 305 | TONKS_TARGETS_OF_RUNX1_RUNX1T1_FUSION_HSC_DN                | -1.96 | 4.00 | 0 | 0 | 0 | Repressed |
| 306 | GO_MITOCHONDRIAL_RNA_PROCESSING                             | -1.96 | 2.61 | 0 | 0 | 0 | Repressed |
| 307 | GO_RNA_POLYMERASE_II_GENERAL_TRANSCRIPTION_INITIATION FACTC | -1.96 | 2.61 | 0 | 0 | 0 | Repressed |
| 308 | VALK_AML_CLUSTER_15                                         | -1.96 | 2.33 | 0 | 0 | 0 | Repressed |
| 309 | GO_ION_CHANNEL_BINDING                                      | -1.95 | 4.00 | 0 | 0 | 0 | Repressed |
| 310 | GO_MITOCHONDRIAL_RNA_METABOLIC_PROCESS                      | -1.95 | 4.00 | 0 | 0 | 0 | Repressed |
| 311 | GO_ORGANELLE_ENVELOPE_LUMEN                                 | -1.95 | 4.00 | 0 | 0 | 0 | Repressed |
| 312 | ICHIBA_GRAFT_VERSUS_HOST_DISEASE_35D_UP                     | -1.95 | 4.00 | 0 | 0 | 0 | Repressed |
| 313 | PID_AURORA_B_PATHWAY                                        | -1.95 | 4.00 | 0 | 0 | 0 | Repressed |
| 314 | POOLA_INVASIVE_BREAST_CANCER_UP                             | -1.95 | 4.00 | 0 | 0 | 0 | Repressed |
| 315 | REACTOME_DEFECTIVE_CFTR_CAUSES_CYSTIC_FIBROSIS              | -1.95 | 4.00 | 0 | 0 | 0 | Repressed |

|     |                                                             |       |      |   |   |   |           |
|-----|-------------------------------------------------------------|-------|------|---|---|---|-----------|
| 316 | REACTOME_RNA_POLYMERASE_II_PRE_TRANSCRIPTION_EVENTS         | -1.95 | 4.00 | 0 | 0 | 0 | Repressed |
| 317 | REACTOME_TRNA_PROCESSING_IN_THE_NUCLEUS                     | -1.95 | 4.00 | 0 | 0 | 0 | Repressed |
| 318 | WONG_PROTEASOME_GENE_MODULE                                 | -1.95 | 4.00 | 0 | 0 | 0 | Repressed |
| 319 | GO_RELEASE_OF_SEQUESTERED_CALCIIUM_ION_INTO_CYTOSOL_BY_EI   | -1.95 | 2.61 | 0 | 0 | 0 | Repressed |
| 320 | BENPORATH_PROLIFERATION                                     | -1.94 | 4.00 | 0 | 0 | 0 | Repressed |
| 321 | BIOCARTA_NO2IL12_PATHWAY                                    | -1.94 | 4.00 | 0 | 0 | 0 | Repressed |
| 322 | GO_ENVELOPE                                                 | -1.94 | 4.00 | 0 | 0 | 0 | Repressed |
| 323 | GO_RRNA_METABOLIC_PROCESS                                   | -1.94 | 4.00 | 0 | 0 | 0 | Repressed |
| 324 | HALLMARK_E2F_TARGETS                                        | -1.94 | 4.00 | 0 | 0 | 0 | Repressed |
| 325 | KUMAMOTO_RESPONSE_TO_NUTLIN_3A_DN                           | -1.94 | 4.00 | 0 | 0 | 0 | Repressed |
| 326 | MOHANKUMAR_HOXA1_TARGETS_UP                                 | -1.94 | 4.00 | 0 | 0 | 0 | Repressed |
| 327 | REACTOME_PEPTIDE_LIGAND_BINDING_RECEPTORS                   | -1.94 | 4.00 | 0 | 0 | 0 | Repressed |
| 328 | SHEPARD_CRUSH_AND_BURN_MUTANT_UP                            | -1.94 | 4.00 | 0 | 0 | 0 | Repressed |
| 329 | YANG_BREAST_CANCER_ESR1_LASER_DN                            | -1.94 | 4.00 | 0 | 0 | 0 | Repressed |
| 330 | WU_APOPTOSIS_BY_CDKN1A_VIA_TP53                             | -1.94 | 2.55 | 0 | 0 | 0 | Repressed |
| 331 | GO_MYELOID_CELL_APOPTOTIC_PROCESS                           | -1.93 | 4.00 | 0 | 0 | 0 | Repressed |
| 332 | GO_PLASMINOGEN_ACTIVATION                                   | -1.93 | 4.00 | 0 | 0 | 0 | Repressed |
| 333 | HALLMARK_GLYCOLYSIS                                         | -1.93 | 4.00 | 0 | 0 | 0 | Repressed |
| 334 | KINSEY_TARGETS_OF_EWSR1_FLII_FUSION_UP                      | -1.93 | 4.00 | 0 | 0 | 0 | Repressed |
| 335 | PACHER_TARGETS_OF_IGF1_AND_IGF2_UP                          | -1.93 | 4.00 | 0 | 0 | 0 | Repressed |
| 336 | PELLICCIOTTA_HDAC_IN_ANTIGEN_PRESENTATION_DN                | -1.93 | 4.00 | 0 | 0 | 0 | Repressed |
| 337 | REACTOME_GLUONEOGENESIS                                     | -1.93 | 4.00 | 0 | 0 | 0 | Repressed |
| 338 | REACTOME_ION_HOMEOSTASIS                                    | -1.93 | 4.00 | 0 | 0 | 0 | Repressed |
| 339 | SAKAI_TUMOR_INFILTRATING_MONOCYTES_DN                       | -1.93 | 4.00 | 0 | 0 | 0 | Repressed |
| 340 | BLALOCK_ALZHEIMERS_DISEASE_DN                               | -1.92 | 4.00 | 0 | 0 | 0 | Repressed |
| 341 | GO_ADP_BINDING                                              | -1.92 | 4.00 | 0 | 0 | 0 | Repressed |
| 342 | GO_CATALYTIC_ACTIVITY_ACTING_ON_RNA                         | -1.92 | 4.00 | 0 | 0 | 0 | Repressed |
| 343 | GO_HEMATOPOIETIC_STEM_CELL_DIFFERENTIATION                  | -1.92 | 4.00 | 0 | 0 | 0 | Repressed |
| 344 | GO_LYMPHOCYTE_CHEMOTAXIS                                    | -1.92 | 4.00 | 0 | 0 | 0 | Repressed |
| 345 | GO_PROTEIN_HETEROTETRAMERIZATION                            | -1.92 | 4.00 | 0 | 0 | 0 | Repressed |
| 346 | GO_RESPIRATORY_CHAIN_COMPLEX_IV_ASSEMBLY                    | -1.92 | 4.00 | 0 | 0 | 0 | Repressed |
| 347 | GRADE_COLON_AND_RECTAL_CANCER_UP                            | -1.92 | 4.00 | 0 | 0 | 0 | Repressed |
| 348 | HWANG_PROSTATE_CANCER_MARKERS                               | -1.92 | 4.00 | 0 | 0 | 0 | Repressed |
| 349 | MATTIOLI_MULTIPLE_MYELOMA_SUBGROUPS                         | -1.92 | 4.00 | 0 | 0 | 0 | Repressed |
| 350 | REACTOME_ASSEMBLY_OF_THE_PRE_REPLICATIVE_COMPLEX            | -1.92 | 4.00 | 0 | 0 | 0 | Repressed |
| 351 | REACTOME_EARLY_PHASE_OF_HIV_LIFE_CYCLE                      | -1.92 | 4.00 | 0 | 0 | 0 | Repressed |
| 352 | SESTO_RESPONSE_TO_UV_C0                                     | -1.92 | 4.00 | 0 | 0 | 0 | Repressed |
| 353 | WHITFIELD_CELL_CYCLE_M_G1                                   | -1.92 | 4.00 | 0 | 0 | 1 | Repressed |
| 354 | COLIN_PILOCYTIC_ASTROCYTOMA_VS_GLIOMASTOMA_DN               | -1.91 | 4.00 | 0 | 0 | 0 | Repressed |
| 355 | CROONQUIST_NRAS_SIGNALING_DN                                | -1.91 | 4.00 | 0 | 0 | 0 | Repressed |
| 356 | FARDIN_HYPOXIA_11                                           | -1.91 | 4.00 | 0 | 0 | 0 | Repressed |
| 357 | GILDEA_METASTASIS                                           | -1.91 | 4.00 | 0 | 0 | 0 | Repressed |
| 358 | GO_FC_EPSILON_RECEPTOR_SIGNALING_PATHWAY                    | -1.91 | 4.00 | 0 | 0 | 0 | Repressed |
| 359 | GO_GENERAL_TRANSCRIPTION_INITIATION_FACTOR_BINDING          | -1.91 | 4.00 | 0 | 0 | 0 | Repressed |
| 360 | GO_ORGANELLAR_SMALL_RIBOSOMAL_SUBUNIT                       | -1.91 | 4.00 | 0 | 0 | 0 | Repressed |
| 361 | GO_RESPONSE_TO_KETONE                                       | -1.91 | 4.00 | 0 | 0 | 0 | Repressed |
| 362 | GO_THIOESTER_METABOLIC_PROCESS                              | -1.91 | 4.00 | 0 | 0 | 0 | Repressed |
| 363 | PELLICCIOTTA_HDAC_IN_ANTIGEN_PRESENTATION_UP                | -1.91 | 4.00 | 0 | 0 | 0 | Repressed |
| 364 | REACTOME_CLEC7A_DECTIN_1_SIGNALING                          | -1.91 | 4.00 | 0 | 0 | 0 | Repressed |
| 365 | REACTOME_DISORDERS_OF_TRANSMEMBRANE_TRANSPORTERS            | -1.91 | 4.00 | 0 | 0 | 0 | Repressed |
| 366 | REACTOME_SIGNALING_BY_HEDGEHOG                              | -1.91 | 4.00 | 0 | 0 | 0 | Repressed |
| 367 | ZHAN_MULTIPLE_MYELOMA_SUBGROUPS                             | -1.91 | 4.00 | 0 | 0 | 0 | Repressed |
| 368 | GO_SYNAPSE_MATURATION                                       | -1.91 | 2.36 | 0 | 0 | 0 | Repressed |
| 369 | DAIRKEE_CANCER_PRONE_RESPONSE_BPA                           | -1.90 | 4.00 | 0 | 0 | 0 | Repressed |
| 370 | GO_CYTOCHROME_COMPLEX_ASSEMBLY                              | -1.90 | 4.00 | 0 | 0 | 0 | Repressed |
| 371 | GO_INTERLEUKIN_1_MEDIATED_SIGNALING_PATHWAY                 | -1.90 | 4.00 | 0 | 0 | 0 | Repressed |
| 372 | GO_NUCLEAR_EXPORT                                           | -1.90 | 4.00 | 0 | 0 | 0 | Repressed |
| 373 | GO_PRERIBOSOME_LARGE_SUBUNIT_PRECURSOR                      | -1.90 | 4.00 | 0 | 0 | 0 | Repressed |
| 374 | GO_TRANSFERASE_ACTIVITY_TRANSFERRING_ALKYL_OR_ARYL_OTHEF    | -1.90 | 4.00 | 0 | 0 | 0 | Repressed |
| 375 | REACTOME_COOPERATION_OF_PDCL_PHLIP1_AND_TRIC_CCT_IN_G_PR    | -1.90 | 4.00 | 0 | 0 | 0 | Repressed |
| 376 | REACTOME_METABOLISM_OF_RNA                                  | -1.90 | 4.00 | 0 | 0 | 0 | Repressed |
| 377 | REACTOME_POST_CHAPERONIN_TUBULIN_FOLDING_PATHWAY            | -1.90 | 4.00 | 0 | 0 | 0 | Repressed |
| 378 | REACTOME_SWITCHING_OF_ORIGINS_TO_A_POST_REPLICATIVE_STATE   | -1.90 | 4.00 | 0 | 0 | 0 | Repressed |
| 379 | STARK_PREFRONTAL_CORTEX_22Q11_DELETION_DN                   | -1.90 | 4.00 | 0 | 0 | 0 | Repressed |
| 380 | ZHONG_SECRETOME_OF_LUNG_CANCER_AND_FIBROBLAST               | -1.90 | 4.00 | 0 | 0 | 0 | Repressed |
| 381 | REACTOME_KINESINS                                           | -1.90 | 2.58 | 0 | 0 | 0 | Repressed |
| 382 | GO_POSITIVE_REGULATION_OF_UBIQUITIN_PROTEIN_LIGASE_ACTIVITY | -1.90 | 2.36 | 0 | 0 | 0 | Repressed |
| 383 | BOSCO_EPITHELIAL_DIFFERENTIATION_MODULE                     | -1.90 | 2.33 | 0 | 0 | 0 | Repressed |
| 384 | DAIRKEE_CANCER_PRONE_RESPONSE_BPA_E2                        | -1.89 | 4.00 | 0 | 0 | 0 | Repressed |
| 385 | GO_NCRNA_TRANSCRIPTION                                      | -1.89 | 4.00 | 0 | 0 | 0 | Repressed |
| 386 | MORI_PRE_BI_LYMPHOCYTE_UP                                   | -1.89 | 4.00 | 0 | 0 | 0 | Repressed |
| 387 | REACTOME_TRANSPORT_OF_CONNEXONS_TO_THE_PLASMA_MEMBRAN       | -1.89 | 4.00 | 0 | 0 | 0 | Repressed |
| 388 | GO_PROTEASOME_REGULATORY_PARTICLE_BASE_SUBCOMPLEX           | -1.89 | 2.62 | 0 | 0 | 0 | Repressed |
| 389 | GO_TIM23_MITOCHONDRIAL_IMPORT_INNER_MEMBRANE_TRANSLOCASE    | -1.89 | 2.61 | 0 | 0 | 0 | Repressed |
| 390 | GO_CALCIIUM_DEPENDENT_PROTEIN_BINDING                       | -1.89 | 2.57 | 0 | 0 | 0 | Repressed |
| 391 | ZHAN_MULTIPLE_MYELOMA_DN                                    | -1.89 | 2.33 | 0 | 0 | 0 | Repressed |
| 392 | CHANG_CYCLING_GENES                                         | -1.88 | 4.00 | 0 | 0 | 0 | Repressed |
| 393 | CHIANG_LIVER_CANCER_SUBCLASS_UNANNOTATED_DN                 | -1.88 | 4.00 | 0 | 0 | 0 | Repressed |
| 394 | ELVIDGE_HIF1A_AND_HIF2A_TARGETS_UP                          | -1.88 | 4.00 | 0 | 0 | 0 | Repressed |
| 395 | GO_CELLULAR_RESPONSE_TO_GLUCAGON_STIMULUS                   | -1.88 | 4.00 | 0 | 0 | 0 | Repressed |
| 396 | GO_HEART_PROCESS                                            | -1.88 | 4.00 | 0 | 0 | 0 | Repressed |
| 397 | GO_LIPASE_INHIBITOR_ACTIVITY                                | -1.88 | 4.00 | 0 | 0 | 0 | Repressed |
| 398 | GO_POSITIVE_REGULATION_OF_RIBOSOME_BIOGENESIS               | -1.88 | 4.00 | 0 | 0 | 0 | Repressed |
| 399 | GO_REGULATION_OF_CHOLESTEROL_BIOSYNTHETIC_PROCESS           | -1.88 | 4.00 | 0 | 0 | 0 | Repressed |
| 400 | GO_RESPONSE_TO_GLUCAGON                                     | -1.88 | 4.00 | 0 | 0 | 0 | Repressed |
| 401 | GO_RNA_BINDING                                              | -1.88 | 4.00 | 0 | 0 | 0 | Repressed |
| 402 | KANG_DOXORUBICIN_RESISTANCE_UP                              | -1.88 | 4.00 | 0 | 0 | 0 | Repressed |
| 403 | KEGG_OOCYTE_MEIOSIS                                         | -1.88 | 4.00 | 0 | 0 | 0 | Repressed |
| 404 | MOHANKUMAR_TLX1_TARGETS_UP                                  | -1.88 | 4.00 | 0 | 0 | 0 | Repressed |
| 405 | REACTOME_PHOSPHORYLATION_OF_EMI1                            | -1.88 | 4.00 | 0 | 0 | 0 | Repressed |
| 406 | RPS14_DN.V1_DN                                              | -1.88 | 4.00 | 0 | 0 | 0 | Repressed |
| 407 | REACTOME_INWARDLY_RECTIFYING_KPLUS_CHANNELS                 | -1.88 | 2.64 | 0 | 0 | 0 | Repressed |
| 408 | GO_PODOSOME_ASSEMBLY                                        | -1.88 | 2.32 | 0 | 0 | 0 | Repressed |
| 409 | REACTOME_INTERLEUKIN_10_SIGNALING                           | -1.88 | 2.32 | 0 | 0 | 0 | Repressed |
| 410 | GO_SPINDLE_MICROTUBULE                                      | -1.88 | 2.29 | 0 | 0 | 0 | Repressed |
| 411 | DELLA_RESPONSE_TO_TSA_AND_BUTYRATE                          | -1.87 | 4.00 | 0 | 0 | 0 | Repressed |
| 412 | DOANE_BREAST_CANCER_ESR1_DN                                 | -1.87 | 4.00 | 0 | 0 | 0 | Repressed |
| 413 | GO_ANTIGEN_PROCESSING_AND_PRESENTATION                      | -1.87 | 4.00 | 0 | 0 | 0 | Repressed |
| 414 | GO_NEGATIVE_REGULATION_OF_CELL_CYCLE_G2_M_PHASE_TRANSITK    | -1.87 | 4.00 | 0 | 0 | 0 | Repressed |
| 415 | GO_REGULATION_OF_ESTABLISHMENT_OF_PLANAR_POLARITY           | -1.87 | 4.00 | 0 | 0 | 0 | Repressed |
| 416 | GO_STEROL_BIOSYNTHETIC_PROCESS                              | -1.87 | 4.00 | 0 | 0 | 0 | Repressed |
| 417 | KAAB_HEART_ATRIUM_VS_VENTRICLE_DN                           | -1.87 | 4.00 | 0 | 0 | 0 | Repressed |
| 418 | KORKOLA_SEMINOMA_UP                                         | -1.87 | 4.00 | 0 | 0 | 0 | Repressed |
| 419 | LI_WILMS_TUMOR_VS_FETAL_KIDNEY_1_DN                         | -1.87 | 4.00 | 0 | 0 | 0 | Repressed |
| 420 | QI_PLASMACYTOMA_UP                                          | -1.87 | 4.00 | 0 | 0 | 0 | Repressed |
| 421 | REACTOME_PROGRAMMED_CELL_DEATH                              | -1.87 | 4.00 | 0 | 0 | 0 | Repressed |
| 422 | REACTOME_RUNX1_REGULATES_TRANSCRIPTION_OF_GENES_INVOLVEI    | -1.87 | 4.00 | 0 | 0 | 0 | Repressed |
| 423 | NAKAYAMA_SOFT_TISSUE_TUMORS_PCA2_DN                         | -1.87 | 2.61 | 0 | 0 | 0 | Repressed |
| 424 | PID_RXR_VDR_PATHWAY                                         | -1.87 | 2.61 | 0 | 0 | 0 | Repressed |

|     |                                                            |       |      |   |   |   |           |
|-----|------------------------------------------------------------|-------|------|---|---|---|-----------|
| 425 | REACTOME_ACTIVATION_OF_NIMA_KINASES_NEK9_NEK6_NEK7         | -1.87 | 2.34 | 0 | 0 | 0 | Repressed |
| 426 | CYCLIN_D1_UP.V1_UP                                         | -1.86 | 4.00 | 0 | 0 | 0 | Repressed |
| 427 | DIAZ_CHRONIC_MEYLOGENOUS_LEUKEMIA_UP                       | -1.86 | 4.00 | 0 | 0 | 0 | Repressed |
| 428 | GO_CHROMOSOME_MOVEMENT_TOWARDS_SPINDLE_POLE                | -1.86 | 4.00 | 0 | 0 | 0 | Repressed |
| 429 | GO_VITAMIN_TRANSMEMBRANE_TRANSPORT                         | -1.86 | 4.00 | 0 | 0 | 0 | Repressed |
| 430 | JAEGER_METASTASIS_UP                                       | -1.86 | 4.00 | 0 | 0 | 0 | Repressed |
| 431 | JISON_SICKLE_CELL_DISEASE_UP                               | -1.86 | 4.00 | 0 | 0 | 0 | Repressed |
| 432 | KEGG_SPLICEOSOME                                           | -1.86 | 4.00 | 0 | 0 | 0 | Repressed |
| 433 | REACTOME_ATF6_ATF6_ALPHA_ACTIVATES_CHAPERONE_GENES         | -1.86 | 4.00 | 0 | 0 | 0 | Repressed |
| 434 | REACTOME_C_TYPE_LECTIN_RECEPTORS_GLRs                      | -1.86 | 4.00 | 0 | 0 | 0 | Repressed |
| 435 | REACTOME_CELLULAR_RESPONSES_TO_STRESS                      | -1.86 | 4.00 | 0 | 0 | 0 | Repressed |
| 436 | REACTOME_G2_M_CHECKPOINTS                                  | -1.86 | 4.00 | 0 | 0 | 0 | Repressed |
| 437 | REACTOME_HOST_INTERACTIONS_WITH_INFLUENZA_FACTORS          | -1.86 | 4.00 | 0 | 0 | 0 | Repressed |
| 438 | REACTOME_NUCLEAR_PORE_COMPLEX_NPC_DISASSEMBLY              | -1.86 | 4.00 | 0 | 0 | 0 | Repressed |
| 439 | REACTOME_REGULATION_OF_HSF1_MEDIATED_HEAT_SHOCK_RESPON     | -1.86 | 4.00 | 0 | 0 | 0 | Repressed |
| 440 | TAVOR_CEBPA_TARGETS_UP                                     | -1.86 | 4.00 | 0 | 0 | 0 | Repressed |
| 441 | VEGF_A_UP.V1_DN                                            | -1.86 | 4.00 | 0 | 0 | 0 | Repressed |
| 442 | WANG_RESPONSE_TO_GSK3_INHIBITOR_SB216763_DN                | -1.86 | 4.00 | 0 | 0 | 0 | Repressed |
| 443 | WHITFIELD_CELL_CYCLE_G2_M                                  | -1.86 | 4.00 | 0 | 0 | 0 | Repressed |
| 444 | FUNG_IL2_SIGNALING_1                                       | -1.86 | 2.62 | 0 | 0 | 0 | Repressed |
| 445 | GO_RNA_CAPPING                                             | -1.86 | 2.60 | 0 | 0 | 0 | Repressed |
| 446 | KEGG_CITRATE_CYCLE_TCA_CYCLE                               | -1.86 | 2.58 | 0 | 0 | 0 | Repressed |
| 447 | BHAT_ESR1_TARGETS_NOT_VIA_AKT1_UP                          | -1.85 | 4.00 | 0 | 0 | 0 | Repressed |
| 448 | GO_OXIDOREDUCTASE_ACTIVITY_ACTING_ON_A_HEME_GROUP_OF_DO    | -1.85 | 4.00 | 0 | 0 | 0 | Repressed |
| 449 | GO_RESPONSE_TO_CORTICOSTEROID                              | -1.85 | 4.00 | 0 | 0 | 0 | Repressed |
| 450 | GO_T_CELL_CHEMOTAXIS                                       | -1.85 | 4.00 | 0 | 0 | 0 | Repressed |
| 451 | KLEIN_PRIMARY_EFFUSION_LYMPHOMA_DN                         | -1.85 | 4.00 | 0 | 0 | 0 | Repressed |
| 452 | LABBE_TARGETS_OF_TGFB1_AND_WNT3A_UP                        | -1.85 | 4.00 | 0 | 0 | 0 | Repressed |
| 453 | MEINHOLD_OVARIAN_CANCER_LOW_GRADE_DN                       | -1.85 | 4.00 | 0 | 0 | 0 | Repressed |
| 454 | MEL18_DN.V1_DN                                             | -1.85 | 4.00 | 0 | 0 | 0 | Repressed |
| 455 | PUJANA_BRCA1_PCC_NETWORK                                   | -1.85 | 4.00 | 0 | 0 | 0 | Repressed |
| 456 | REACTOME_DNA_REPLICATION_PRE_INITIATION                    | -1.85 | 4.00 | 0 | 0 | 0 | Repressed |
| 457 | REACTOME_G1_S_DNA_DAMAGE_CHECKPOINTS                       | -1.85 | 4.00 | 0 | 0 | 0 | Repressed |
| 458 | REACTOME_INHIBITION_OF_THE_PROTEOLYTIC_ACTIVITY_OF_APC_C_R | -1.85 | 4.00 | 0 | 0 | 0 | Repressed |
| 459 | REACTOME_INTERLEUKIN_1_SIGNALING                           | -1.85 | 4.00 | 0 | 0 | 0 | Repressed |
| 460 | WHITFIELD_CELL_CYCLE_LITERATURE                            | -1.85 | 4.00 | 0 | 0 | 0 | Repressed |
| 461 | GREENBAUM_E2A_TARGETS_UP                                   | -1.85 | 2.61 | 0 | 0 | 0 | Repressed |
| 462 | FURUKAWA_DUSP6_TARGETS_PC3s_DN                             | -1.85 | 2.56 | 0 | 0 | 0 | Repressed |
| 463 | GO_TOXIN_TRANSPORT                                         | -1.85 | 2.31 | 0 | 0 | 0 | Repressed |
| 464 | GO_MITOCHONDRIAL_RESPIRATORY_CHAIN_COMPLEX_IV_ASSEMBLY     | -1.85 | 2.15 | 0 | 0 | 0 | Repressed |
| 465 | GO_RESPONSE_TO_MINERALOCORTICOID                           | -1.85 | 2.02 | 0 | 0 | 0 | Repressed |
| 466 | CAIRO_HEPATOBLASTOMA_CLASSES_UP                            | -1.84 | 4.00 | 0 | 0 | 0 | Repressed |
| 467 | GO_CELLULAR_RESPONSE_TO_HEAT                               | -1.84 | 4.00 | 0 | 0 | 0 | Repressed |
| 468 | GO_OXIDOREDUCTASE_ACTIVITY                                 | -1.84 | 4.00 | 0 | 0 | 0 | Repressed |
| 469 | LABBE_WNT3A_TARGETS_UP                                     | -1.84 | 4.00 | 0 | 0 | 0 | Repressed |
| 470 | MIKKELSEN_MEF_LCP_WITH_H3K4ME3                             | -1.84 | 4.00 | 0 | 0 | 0 | Repressed |
| 471 | REACTOME_UBIQUINOL_BIOSYNTHESIS                            | -1.84 | 4.00 | 0 | 0 | 0 | Repressed |
| 472 | ZHONG_SECRETOME_OF_LUNG_CANCER_AND_MACROPHAGE              | -1.84 | 4.00 | 0 | 0 | 0 | Repressed |
| 473 | REACTOME_CHEMOKINE_RECEPTORS_BIND_CHEMOKINES               | -1.84 | 2.64 | 0 | 0 | 0 | Repressed |
| 474 | REACTOME_PHOSPHORYLATION_OF_THE_APC_C                      | -1.84 | 2.62 | 0 | 0 | 0 | Repressed |
| 475 | NAGASHIMA_EGF_SIGNALING_UP                                 | -1.84 | 2.59 | 0 | 0 | 0 | Repressed |
| 476 | GO_NUCLEOSIDE_BISPHOSPHATE_METABOLIC_PROCESS               | -1.84 | 2.55 | 0 | 0 | 0 | Repressed |
| 477 | REACTOME_GAP_JUNCTION_ASSEMBLY                             | -1.84 | 2.35 | 0 | 0 | 0 | Repressed |
| 478 | GO_RESPONSE_TO_AMINE                                       | -1.84 | 2.29 | 0 | 0 | 0 | Repressed |
| 479 | BORCZUK_MALIGNANT_MESOTHELIOMA_UP                          | -1.83 | 4.00 | 0 | 0 | 0 | Repressed |
| 480 | BURTON_ADIPOGENESIS_6                                      | -1.83 | 4.00 | 0 | 0 | 0 | Repressed |
| 481 | GO_MITOCHONDRION_MORPHOGENESIS                             | -1.83 | 4.00 | 0 | 0 | 0 | Repressed |
| 482 | GO_MULTI_ORGANISM_MEMBRANE_ORGANIZATION                    | -1.83 | 4.00 | 0 | 0 | 0 | Repressed |
| 483 | GO_RIBONUCLEOPROTEIN_COMPLEX_BIOGENESIS                    | -1.83 | 4.00 | 0 | 0 | 0 | Repressed |
| 484 | GO_SNRNA_PROCESSING                                        | -1.83 | 4.00 | 0 | 0 | 0 | Repressed |
| 485 | GO_SPLICEOSOMAL_SNRNP_ASSEMBLY                             | -1.83 | 4.00 | 0 | 0 | 0 | Repressed |
| 486 | GO_TELOMERASE_RNA_LOCALIZATION                             | -1.83 | 4.00 | 0 | 0 | 0 | Repressed |
| 487 | LE_EGR2_TARGETS_UP                                         | -1.83 | 4.00 | 0 | 0 | 0 | Repressed |
| 488 | PID_HIF1_TFPATHWAY                                         | -1.83 | 4.00 | 0 | 0 | 0 | Repressed |
| 489 | REACTOME_INTERACTIONS_OF_REV_WITH_HOST_CELLULAR_PROTEINS   | -1.83 | 4.00 | 0 | 0 | 0 | Repressed |
| 490 | REACTOME_INTERLEUKIN_12_SIGNALING                          | -1.83 | 4.00 | 0 | 0 | 0 | Repressed |
| 491 | SESTO_RESPONSE_TO_UV_C7                                    | -1.83 | 4.00 | 0 | 0 | 0 | Repressed |
| 492 | GO_PHOSPHOLIPASE_INHIBITOR_ACTIVITY                        | -1.83 | 2.68 | 0 | 0 | 0 | Repressed |
| 493 | BIOCARTA_MHC_PATHWAY                                       | -1.83 | 2.66 | 0 | 0 | 0 | Repressed |
| 494 | GO_VENTRICULAR_CARDIAC_MUSCLE_CELL_DIFFERENTIATION         | -1.83 | 2.62 | 0 | 0 | 0 | Repressed |
| 495 | GO_TBP_CLASS_PROTEIN_BINDING                               | -1.83 | 2.60 | 0 | 0 | 0 | Repressed |
| 496 | FINETTI_BREAST_CANCER_KINOME_RED                           | -1.83 | 2.59 | 0 | 0 | 0 | Repressed |
| 497 | GO_ESTABLISHMENT_OF_PROTEIN_LOCALIZATION_TO_MITOCHONDRIAL  | -1.83 | 2.16 | 0 | 0 | 0 | Repressed |
| 498 | BLUM_RESPONSE_TO_SALIRASIB_DN                              | -1.82 | 4.00 | 0 | 0 | 0 | Repressed |
| 499 | CAFFAREL_RESPONSE_TO_THC_8HR_3_DN                          | -1.82 | 4.00 | 0 | 0 | 0 | Repressed |
| 500 | GO_CYTOKINE_BINDING                                        | -1.82 | 4.00 | 0 | 0 | 0 | Repressed |
| 501 | GO_MORPHOGENESIS_OF_A_POLARIZED_EPITHELIUM                 | -1.82 | 4.00 | 0 | 0 | 0 | Repressed |
| 502 | GO_RESPIRATORY_CHAIN_COMPLEX_IV                            | -1.82 | 4.00 | 0 | 0 | 0 | Repressed |
| 503 | GO_RNA_5_END_PROCESSING                                    | -1.82 | 4.00 | 0 | 0 | 0 | Repressed |
| 504 | REACTOME_MRNA_CAPPING                                      | -1.82 | 4.00 | 0 | 0 | 0 | Repressed |
| 505 | VANTVEER_BREAST_CANCER_METASTASIS_DN                       | -1.82 | 4.00 | 0 | 0 | 0 | Repressed |
| 506 | DASU_IL6_SIGNALING_SCAR_UP                                 | -1.82 | 2.64 | 0 | 0 | 0 | Repressed |
| 507 | BIOCARTA_MPR_PATHWAY                                       | -1.82 | 2.62 | 0 | 0 | 0 | Repressed |
| 508 | MAGRANGEAS_MULTIPLE_MYELOMA_IGG_VS_IGA_UP                  | -1.82 | 2.62 | 0 | 0 | 0 | Repressed |
| 509 | VANDESLUIS_COMMD1_TARGETS_GROUP_2_UP                       | -1.82 | 2.62 | 0 | 0 | 0 | Repressed |
| 510 | REACTOME_ACTIVATION_OF_GENE_EXPRESSION_BY_SREBF_SREBP      | -1.82 | 2.57 | 0 | 0 | 0 | Repressed |
| 511 | LEE_NEURAL_CRESCENT_STEM_CELL_UP                           | -1.82 | 2.56 | 0 | 0 | 0 | Repressed |
| 512 | REACTOME_VIRAL_MESSENGER_RNA_SYNTHESIS                     | -1.82 | 2.55 | 0 | 0 | 0 | Repressed |
| 513 | GO_G_PROTEIN_COUPLED_CHEMOATTRACTANT_RECEPTOR_ACTIVITY     | -1.82 | 2.13 | 0 | 0 | 0 | Repressed |
| 514 | BIDUS_METASTASIS_UP                                        | -1.81 | 4.00 | 0 | 0 | 0 | Repressed |
| 515 | CAHOY_ASTROGLIAL                                           | -1.81 | 4.00 | 0 | 0 | 0 | Repressed |
| 516 | CHIANG_LIVER_CANCER_SUBCLASS_PROLIFERATION_UP              | -1.81 | 4.00 | 0 | 0 | 0 | Repressed |
| 517 | GO_NUCLEOBASE_CONTAINING_COMPOUND_TRANSPORT                | -1.81 | 4.00 | 0 | 0 | 0 | Repressed |
| 518 | GO_ORGANIC_ACID_METABOLIC_PROCESS                          | -1.81 | 4.00 | 0 | 0 | 0 | Repressed |
| 519 | GO_OXIDATION_REDUCTION_PROCESS                             | -1.81 | 4.00 | 0 | 0 | 0 | Repressed |
| 520 | KIM_WT1_TARGETS_12HR_DN                                    | -1.81 | 4.00 | 0 | 0 | 0 | Repressed |
| 521 | REACTOME_ABORTIVE_ELONGATION_OF_HIV_1_TRANSCRIPT_IN_THE_A  | -1.81 | 4.00 | 0 | 0 | 0 | Repressed |
| 522 | REACTOME_G_ALPHA_I_SIGNALING_EVENTS                        | -1.81 | 4.00 | 0 | 0 | 0 | Repressed |
| 523 | REACTOME_MHC_CLASS_II_ANTIGEN_PRESENTATION                 | -1.81 | 4.00 | 0 | 0 | 0 | Repressed |
| 524 | FARDIN_HYPOXIA_9                                           | -1.81 | 2.64 | 0 | 0 | 0 | Repressed |
| 525 | IVANOV_MUTATED_IN_COLON_CANCER                             | -1.81 | 2.64 | 0 | 0 | 0 | Repressed |
| 526 | PID_CD8_TCR_DOWNSTREAM_PATHWAY                             | -1.81 | 2.28 | 0 | 0 | 0 | Repressed |
| 527 | GO_SIRNA_BINDING                                           | -1.81 | 2.17 | 0 | 0 | 0 | Repressed |
| 528 | GO_RESPONSE_TO_MUSCLE_STRETCH                              | -1.81 | 2.16 | 0 | 0 | 0 | Repressed |
| 529 | GO_RNA_POLYMERASE_III_COMPLEX                              | -1.81 | 2.04 | 0 | 0 | 0 | Repressed |
| 530 | DAZARD_RESPONSE_TO_UV_SCC_UP                               | -1.80 | 4.00 | 0 | 0 | 0 | Repressed |
| 531 | GO_AEROBIC_RESPIRATION                                     | -1.80 | 4.00 | 0 | 0 | 0 | Repressed |
| 532 | GO_CHAPERONE_MEDIATED_PROTEIN_FOLDING                      | -1.80 | 4.00 | 0 | 0 | 0 | Repressed |
| 533 | GO_MRNA_EXPORT_FROM_NUCLEUS                                | -1.80 | 4.00 | 0 | 0 | 0 | Repressed |

|     |                                                           |       |      |   |   |   |           |
|-----|-----------------------------------------------------------|-------|------|---|---|---|-----------|
| 534 | GO_MULTI_ORGANISM_MEMBRANE_FUSION                         | -1.80 | 4.00 | 0 | 0 | 0 | Repressed |
| 535 | GO_ORGANIC_ACID_BIOSYNTHETIC_PROCESS                      | -1.80 | 4.00 | 0 | 0 | 0 | Repressed |
| 536 | GO_REGULATION_OF_SMALL_MOLECULE_METABOLIC_PROCESS         | -1.80 | 4.00 | 0 | 0 | 0 | Repressed |
| 537 | GO_RNA_METABOLIC_PROCESS                                  | -1.80 | 4.00 | 0 | 0 | 0 | Repressed |
| 538 | GO_SARCOPLASM                                             | -1.80 | 4.00 | 0 | 0 | 0 | Repressed |
| 539 | REACTOME_FORMATION_OF_THE_EARLY_ELONGATION_COMPLEX        | -1.80 | 4.00 | 0 | 0 | 0 | Repressed |
| 540 | REACTOME_INTEGRATION_OF_ENERGY_METABOLISM                 | -1.80 | 4.00 | 0 | 0 | 0 | Repressed |
| 541 | REACTOME_RESPONSE_TO_ELEVATED_PLATELET_CYTOSOLIC_CA2PLI   | -1.80 | 4.00 | 0 | 0 | 0 | Repressed |
| 542 | REACTOME_TRNA_MODIFICATION_IN_THE_NUCLEUS_AND_CYTOSOL     | -1.80 | 4.00 | 0 | 0 | 0 | Repressed |
| 543 | REN_ALVEOLAR_RHABDOMYOSARCOMA_DN                          | -1.80 | 4.00 | 0 | 0 | 0 | Repressed |
| 544 | WHITEFORD_PEDIATRIC_CANCER_MARKERS                        | -1.80 | 4.00 | 0 | 0 | 0 | Repressed |
| 545 | GO_ADENYLATE_CYCLASE_BINDING                              | -1.80 | 2.17 | 0 | 0 | 0 | Repressed |
| 546 | DORN_ADENOVIRUS_INFECTION_12HR_DN                         | -1.80 | 2.15 | 0 | 0 | 0 | Repressed |
| 547 | LIU_IL13_MEMORY_MODEL_UP                                  | -1.80 | 2.14 | 0 | 0 | 0 | Repressed |
| 548 | REACTOME_STING_MEDIATED_INDUCION_OF_HOST_IMMUNE_RESPON    | -1.80 | 1.94 | 0 | 0 | 0 | Repressed |
| 549 | GO_INTERACTION_WITH_SYMBIONT                              | -1.79 | 4.00 | 0 | 0 | 0 | Repressed |
| 550 | GO_MRNA_TRANSPORT                                         | -1.79 | 4.00 | 0 | 0 | 0 | Repressed |
| 551 | GO_PEPTIDASE_ACTIVATOR_ACTIVITY                           | -1.79 | 4.00 | 0 | 0 | 0 | Repressed |
| 552 | GO_PROTEIN_FOLDING                                        | -1.79 | 4.00 | 0 | 0 | 0 | Repressed |
| 553 | GO_RESPONSE_TO ESTRADIOL                                  | -1.79 | 4.00 | 0 | 0 | 0 | Repressed |
| 554 | GO_RESPONSE_TO_INTERLEUKIN_12                             | -1.79 | 4.00 | 0 | 0 | 0 | Repressed |
| 555 | REACTOME_CYCLIN_A-CDK2_ASSOCIATED_EVENTS_AT_S_PHASE_ENTR  | -1.79 | 4.00 | 0 | 0 | 0 | Repressed |
| 556 | REACTOME_NUCLEAR_ENVELOPE_BREAKDOWN                       | -1.79 | 4.00 | 0 | 0 | 0 | Repressed |
| 557 | SHETH_LIVER_CANCER_VS_TXNIP_LOSS_PAM2                     | -1.79 | 4.00 | 0 | 0 | 0 | Repressed |
| 558 | ZHANG_RESPONSE_TO_CANTHARIDIN_DN                          | -1.79 | 4.00 | 0 | 0 | 0 | Repressed |
| 559 | GO_2_IRON_2_SULFUR_CLUSTER_BINDING                        | -1.79 | 2.62 | 0 | 0 | 0 | Repressed |
| 560 | GO_THREONINE_TYPE_PEPTIDASE_ACTIVITY                      | -1.79 | 2.60 | 0 | 0 | 0 | Repressed |
| 561 | REACTOME_RECYCLING_PATHWAY_OF_L1                          | -1.79 | 2.57 | 0 | 0 | 0 | Repressed |
| 562 | SIG_CHEMOTAXIS                                            | -1.79 | 2.56 | 0 | 0 | 0 | Repressed |
| 563 | JEON_SMAD6_TARGETS_DN                                     | -1.79 | 2.36 | 0 | 0 | 0 | Repressed |
| 564 | BIOCARTA_RANMS_PATHWAY                                    | -1.79 | 2.33 | 0 | 0 | 0 | Repressed |
| 565 | GO_PROTEASOME_CORE_COMPLEX                                | -1.79 | 2.31 | 0 | 0 | 0 | Repressed |
| 566 | GO_MATURATION_OF_5_8S_RRNA                                | -1.79 | 2.03 | 0 | 0 | 0 | Repressed |
| 567 | GO_CADHERIN_BINDING_INVOLVED_IN_CELL_CELL_ADHESION        | -1.79 | 1.86 | 0 | 0 | 0 | Repressed |
| 568 | GO_POSITIVE_REGULATION_BY_HOST_OF_VIRAL_PROCESS           | -1.79 | 1.69 | 0 | 0 | 0 | Repressed |
| 569 | DODD_NASOPHARYNGEAL_CARCINOMA_DN                          | -1.78 | 4.00 | 0 | 0 | 0 | Repressed |
| 570 | GO_ANIMAL_ORGAN_REGENERATION                              | -1.78 | 4.00 | 0 | 0 | 0 | Repressed |
| 571 | GO_ISOMERASE_ACTIVITY                                     | -1.78 | 4.00 | 0 | 0 | 0 | Repressed |
| 572 | GO_MITOCHONDRION_ORGANIZATION                             | -1.78 | 4.00 | 0 | 0 | 0 | Repressed |
| 573 | GO_SUPEROXIDE_METABOLIC_PROCESS                           | -1.78 | 4.00 | 0 | 0 | 0 | Repressed |
| 574 | GO_VESICLE_LUMEN                                          | -1.78 | 4.00 | 0 | 0 | 0 | Repressed |
| 575 | LI_INDUCED_T_TO_NATURAL_KILLER_UP                         | -1.78 | 4.00 | 0 | 0 | 0 | Repressed |
| 576 | ONDER_CDHI_TARGETS_1_DN                                   | -1.78 | 4.00 | 0 | 0 | 0 | Repressed |
| 577 | REACTOME_FC_EPSILON_RECEPTOR_FCERI_SIGNALING              | -1.78 | 4.00 | 0 | 0 | 0 | Repressed |
| 578 | REACTOME_MITOTIC_PROPHASE                                 | -1.78 | 4.00 | 0 | 0 | 0 | Repressed |
| 579 | REACTOME_MUSCLE_CONTRACTION                               | -1.78 | 4.00 | 0 | 0 | 0 | Repressed |
| 580 | REACTOME_PROCESSING_OF_CAPPED_INTRON_CONTAINING_PRE_MRN   | -1.78 | 4.00 | 0 | 0 | 0 | Repressed |
| 581 | GO_ANATOMICAL_STRUCTURE_ARRANGEMENT                       | -1.78 | 2.64 | 0 | 0 | 0 | Repressed |
| 582 | BIOCARTA_HIF_PATHWAY                                      | -1.78 | 2.61 | 0 | 0 | 0 | Repressed |
| 583 | KORKOLA_YOLK_SAC_TUMOR_UP                                 | -1.78 | 2.61 | 0 | 0 | 0 | Repressed |
| 584 | REACTOME_TRANSPORT_OF_THE_SLPB_DEPENDANT_MATURE_MRNA      | -1.78 | 2.61 | 0 | 0 | 0 | Repressed |
| 585 | SPIRA_SMOKERS_LUNG_CANCER_UP                              | -1.78 | 2.61 | 0 | 0 | 0 | Repressed |
| 586 | GO_PROTEASOMAL_UBIQUITIN_INDEPENDENT_PROTEIN_CATABOLIC_PR | -1.78 | 2.60 | 0 | 0 | 0 | Repressed |
| 587 | REACTOME_ABC_FAMILY_PROTEINS_MEDIATED_TRANSPORT           | -1.78 | 2.51 | 0 | 0 | 0 | Repressed |
| 588 | GO_CHEMOKINE_BINDING                                      | -1.78 | 2.30 | 0 | 0 | 0 | Repressed |
| 589 | GO_INNER_MITOCHONDRIAL_MEMBRANE_ORGANIZATION              | -1.78 | 2.29 | 0 | 0 | 0 | Repressed |
| 590 | HOFFMANN_SMALL_PRE_BII_TO_IMMATURE_B_LYMPHOCYTE_UP        | -1.78 | 2.29 | 0 | 0 | 0 | Repressed |
| 591 | REACTOME_APC_CDC20_MEDIATED_DEGRADATION_OF_NEK2A          | -1.78 | 2.28 | 0 | 0 | 0 | Repressed |
| 592 | GO_ENDOCYTIC_VESICLE_LUMEN                                | -1.78 | 2.19 | 0 | 0 | 0 | Repressed |
| 593 | GARGALOVIC_RESPONSE_TO_OXIDIZED_PHOSPHOLIPIDS_RED_UP      | -1.78 | 2.14 | 0 | 0 | 0 | Repressed |
| 594 | GO_REGULATION_OF_SUPEROXIDE_METABOLIC_PROCESS             | -1.78 | 2.12 | 0 | 0 | 0 | Repressed |
| 595 | GO_DENDRITIC_CELL_MIGRATION                               | -1.78 | 2.05 | 0 | 0 | 0 | Repressed |
| 596 | GO_CALCIIUM_DEPENDENT_PHOSPHOLIPID_BINDING                | -1.78 | 2.00 | 0 | 0 | 0 | Repressed |
| 597 | GO_PROTEIN_IMPORT_INTO_MITOCHONDRIAL_MATRIX               | -1.78 | 1.94 | 0 | 0 | 0 | Repressed |
| 598 | GO_C_C_CHEMOKINE_BINDING                                  | -1.78 | 1.78 | 0 | 0 | 0 | Repressed |
| 599 | AMIT_EGF_RESPONSE_240_MCF10A                              | -1.77 | 4.00 | 0 | 0 | 0 | Repressed |
| 600 | BHAT_ESR1_TARGETS_VIA_AKT1_UP                             | -1.77 | 4.00 | 0 | 0 | 0 | Repressed |
| 601 | FERREIRA_EWINGS_SARCOMA_UNSTABLE_VS_STABLE_UP             | -1.77 | 4.00 | 0 | 0 | 0 | Repressed |
| 602 | GO_PROTEIN_CONTAINING_COMPLEX_DISASSEMBLY                 | -1.77 | 4.00 | 0 | 0 | 0 | Repressed |
| 603 | GO_SARCOLEMMA                                             | -1.77 | 4.00 | 0 | 0 | 0 | Repressed |
| 604 | KEGG_ANTIGEN_PROCESSING_AND_PRESENTATION                  | -1.77 | 4.00 | 0 | 0 | 0 | Repressed |
| 605 | REACTOME_MRNA_SPLICING                                    | -1.77 | 4.00 | 0 | 0 | 0 | Repressed |
| 606 | REACTOME_RHO_GTPASES_ACTIVATE_FORMINS                     | -1.77 | 4.00 | 0 | 0 | 0 | Repressed |
| 607 | SASAL_TARGETS_OF_CXCR6_AND_PTCH1_UP                       | -1.77 | 2.66 | 0 | 0 | 0 | Repressed |
| 608 | GO_SMN_SM_PROTEIN_COMPLEX                                 | -1.77 | 2.65 | 0 | 0 | 0 | Repressed |
| 609 | GRATIAS_RETINOBLASTOMA_16Q24                              | -1.77 | 2.62 | 0 | 0 | 0 | Repressed |
| 610 | GO_CARTILAGE_DEVELOPMENT_INVOLVED_IN_ENDOCHONDRAL_BONE_   | -1.77 | 2.60 | 0 | 0 | 0 | Repressed |
| 611 | ZHAN_MULTIPLE_MYELOMA_CD2_DN                              | -1.77 | 2.59 | 0 | 0 | 0 | Repressed |
| 612 | FU_INTERACT_WITH_ALKBH8                                   | -1.77 | 2.33 | 0 | 0 | 0 | Repressed |
| 613 | GO_RESPONSE_TO_CHEMOKINE                                  | -1.77 | 2.33 | 0 | 0 | 0 | Repressed |
| 614 | GO_PROTEASOME_REGULATORY_PARTICLE_LID_SUBCOMPLEX          | -1.77 | 2.18 | 0 | 0 | 0 | Repressed |
| 615 | REACTOME_ACTIVATION_OF_AMPK_DOWNSTREAM_OF_NMDARS          | -1.77 | 2.15 | 0 | 0 | 0 | Repressed |
| 616 | KEGG_VALINE_LEUCINE_AND_Isoleucine_BIOSYNTHESIS           | -1.77 | 2.14 | 1 | 0 | 0 | Repressed |
| 617 | REACTOME_ANTIMICROBIAL_PEPTIDES                           | -1.77 | 2.14 | 0 | 0 | 0 | Repressed |
| 618 | REACTOME_MET_ACTIVATES_PTK2_SIGNALING                     | -1.77 | 1.98 | 0 | 0 | 0 | Repressed |
| 619 | REACTOME_GOLGI_CISTERNAE_PERICENTRIOLAR_STACK_REORGANIZ   | -1.77 | 1.92 | 0 | 0 | 0 | Repressed |
| 620 | REACTOME_RHO_GTPASES_ACTIVATE_IQGAPS                      | -1.77 | 1.90 | 0 | 0 | 0 | Repressed |
| 621 | NGO_MALIGNANT_GLIOMA_1P_LOH                               | -1.77 | 1.86 | 0 | 0 | 0 | Repressed |
| 622 | ALFANO_MYC_TARGETS                                        | -1.76 | 4.00 | 0 | 0 | 0 | Repressed |
| 623 | SESTO_RESPONSE_TO_UV_C1                                   | -1.76 | 4.00 | 0 | 0 | 0 | Repressed |
| 624 | TAKAO_RESPONSE_TO_UVB_RADIATION_DN                        | -1.76 | 4.00 | 0 | 0 | 0 | Repressed |
| 625 | TONKS_TARGETS_OF_RUNX1_RUNX1T1_FUSION_MONOCYTE_UP         | -1.76 | 4.00 | 0 | 0 | 0 | Repressed |
| 626 | REACTOME_COPI_INDEPENDENT_GOLGI_TO_ER_RETROGRADE_TRAFFI   | -1.76 | 2.58 | 0 | 0 | 0 | Repressed |
| 627 | GO_DNA_TEMPLATED_TRANSCRIPTION_TERMINATION                | -1.76 | 2.53 | 0 | 0 | 0 | Repressed |
| 628 | DUNNE_TARGETS_OF_AML1_MTG8_FUSION_DN                      | -1.76 | 2.32 | 0 | 0 | 0 | Repressed |
| 629 | MOOTHA_TCA                                                | -1.76 | 2.32 | 0 | 0 | 0 | Repressed |
| 630 | CHR5P15                                                   | -1.76 | 2.28 | 0 | 0 | 0 | Repressed |
| 631 | GO_MITOCHONDRIAL_TRANSMEMBRANE_TRANSPORT                  | -1.76 | 2.28 | 0 | 0 | 0 | Repressed |
| 632 | BIOCARTA_NPC_PATHWAY                                      | -1.76 | 2.16 | 0 | 0 | 0 | Repressed |
| 633 | GO_ARP2_3_PROTEIN_COMPLEX                                 | -1.76 | 2.15 | 0 | 0 | 0 | Repressed |
| 634 | GO_INNER_EAR_RECEPTOR_CELL_STEREOCILIIUM_ORGANIZATION     | -1.76 | 2.04 | 0 | 0 | 0 | Repressed |
| 635 | GO_POSITIVE_REGULATION_OF_CATION_CHANNEL_ACTIVITY         | -1.76 | 2.01 | 0 | 0 | 0 | Repressed |
| 636 | GO_OXIDOREDUCTASE_ACTIVITY_ACTING_ON_PEROXIDE_AS_ACCEPTO  | -1.76 | 1.99 | 0 | 0 | 0 | Repressed |
| 637 | GO_NEUTRAL_AMINO_ACID_TRANSMEMBRANE_TRANSPORTER_ACTIVIT   | -1.76 | 1.93 | 0 | 0 | 0 | Repressed |
| 638 | OXFORD_RALA_OR_RALB_TARGETS_DN                            | -1.76 | 1.92 | 0 | 0 | 0 | Repressed |
| 639 | GO_RESPONSE_TO_HYPEROXIA                                  | -1.76 | 1.87 | 0 | 0 | 0 | Repressed |
| 640 | CHICAS_RB1_TARGETS_GROWING                                | -1.75 | 4.00 | 0 | 0 | 0 | Repressed |
| 641 | FARMER_BREAST_CANCER_APOCRINE_VS_BASAL                    | -1.75 | 4.00 | 0 | 0 | 0 | Repressed |
| 642 | GO_BOX_C_D_SNORNP_COMPLEX                                 | -1.75 | 4.00 | 0 | 0 | 0 | Repressed |

|     |                                                             |       |      |   |   |   |           |
|-----|-------------------------------------------------------------|-------|------|---|---|---|-----------|
| 643 | GO_DNA_TEMPLATED_TRANSCRIPTION_INITIATION                   | -1.75 | 4.00 | 0 | 0 | 0 | Repressed |
| 644 | GO_POSITIVE_REGULATION_OF_OXIDOREDUCTASE_ACTIVITY           | -1.75 | 4.00 | 0 | 0 | 0 | Repressed |
| 645 | GO_REGULATION_OF_REACTIVE_OXYGEN_SPECIES_METABOLIC_PROCI    | -1.75 | 4.00 | 0 | 0 | 0 | Repressed |
| 646 | LAHO_COLORECTAL_CANCER_SERRATED_UP                          | -1.75 | 4.00 | 0 | 0 | 0 | Repressed |
| 647 | PEART_HDAC_PROLIFERATION_CLUSTER_DN                         | -1.75 | 4.00 | 0 | 0 | 0 | Repressed |
| 648 | PUIFFE_INVASION_INHIBITED_BY_ASCITES_UP                     | -1.75 | 4.00 | 0 | 0 | 0 | Repressed |
| 649 | REACTOME_BINDING_AND_UPTAKE_OF_LIGANDS_BY_SCAVENGER_REC1    | -1.75 | 4.00 | 0 | 0 | 0 | Repressed |
| 650 | REACTOME_TRANSCRIPTIONAL_REGULATION_BY_SMALL_RNAS           | -1.75 | 4.00 | 0 | 0 | 0 | Repressed |
| 651 | GO_PEPTIDE_RECEPTOR_ACTIVITY                                | -1.75 | 2.59 | 0 | 0 | 0 | Repressed |
| 652 | GO_TRNA_TRANSPORT                                           | -1.75 | 2.56 | 0 | 0 | 0 | Repressed |
| 653 | REACTOME_THE_CANONICAL_RETINOID_CYCLE_IN_RODS_TWILIGHT_VK   | -1.75 | 2.36 | 0 | 0 | 0 | Repressed |
| 654 | GO_NUCLEAR_NUCLEOSOME                                       | -1.75 | 2.31 | 0 | 0 | 0 | Repressed |
| 655 | REACTOME_MRNA_SPLICING_MINOR_PATHWAY                        | -1.75 | 2.27 | 0 | 0 | 0 | Repressed |
| 656 | GO_PEPTIDYL_ARGININE_MODIFICATION                           | -1.75 | 2.16 | 0 | 0 | 0 | Repressed |
| 657 | GO_VITAMIN_TRANSPORT                                        | -1.75 | 2.13 | 0 | 0 | 0 | Repressed |
| 658 | KEGG_PROPANOATE_METABOLISM                                  | -1.75 | 2.12 | 0 | 0 | 0 | Repressed |
| 659 | REACTOME_EXPORT_OF_VIRAL_RIBONUCLEOPROTEINS_FROM_NUCLE      | -1.75 | 2.10 | 0 | 0 | 0 | Repressed |
| 660 | REACTOME_VASOPRESSIN_REGULATES_RENAL_WATER_HOMEOSTASIS      | -1.75 | 2.00 | 0 | 0 | 0 | Repressed |
| 661 | GO_ADENYL_NUCLEOTIDE_EXCHANGE_FACTOR_ACTIVITY               | -1.75 | 1.97 | 0 | 0 | 0 | Repressed |
| 662 | ITO_PTTG1_TARGETS_DN                                        | -1.75 | 1.96 | 0 | 0 | 0 | Repressed |
| 663 | GO_REGULATION_OF_PROTON_TRANSPORT                           | -1.75 | 1.85 | 0 | 0 | 0 | Repressed |
| 664 | LEE_INTRATHYMIC_T_PROGENITOR                                | -1.75 | 1.81 | 0 | 0 | 0 | Repressed |
| 665 | SMID_BREAST_CANCER_LUMINAL_A_DN                             | -1.75 | 1.77 | 0 | 0 | 0 | Repressed |
| 666 | DANG_MYC_TARGETS_UP                                         | -1.74 | 4.00 | 0 | 0 | 0 | Repressed |
| 667 | GO_S_ADENOSYLMETHIONINE_DEPENDENT_METHYLTRANSFERASE_ACT     | -1.74 | 4.00 | 0 | 0 | 0 | Repressed |
| 668 | GO_SEQUESTERING_OF_CALCIIUM_ION                             | -1.74 | 4.00 | 0 | 0 | 0 | Repressed |
| 669 | MULLIGAN_NTF3_SIGNALING_VIA_INSR_AND_IGF1R_UP               | -1.74 | 4.00 | 0 | 0 | 0 | Repressed |
| 670 | PAL_PRMT5_TARGETS_UP                                        | -1.74 | 4.00 | 0 | 0 | 0 | Repressed |
| 671 | REACTOME_CELLULAR_RESPONSE_TO_HEAT_STRESS                   | -1.74 | 4.00 | 0 | 0 | 0 | Repressed |
| 672 | REACTOME_TP53_REGULATES_METABOLIC_GENES                     | -1.74 | 4.00 | 0 | 0 | 0 | Repressed |
| 673 | WANG_TARGETS_OF_MLL_CBP_FUSION_DN                           | -1.74 | 4.00 | 0 | 0 | 0 | Repressed |
| 674 | GO_METHYLOSOME                                              | -1.74 | 2.62 | 0 | 0 | 0 | Repressed |
| 675 | CERVERA_SDHB_TARGETS_2                                      | -1.74 | 2.55 | 0 | 0 | 0 | Repressed |
| 676 | GO_TRANSCRIPTION_INITIATION_FROM_RNA_POLYMERASE_II_PROMOTI  | -1.74 | 2.48 | 0 | 0 | 0 | Repressed |
| 677 | GO_CELL_PROLIFERATION_INVOLVED_IN_METANEPHROS_DEVELOPME     | -1.74 | 2.37 | 0 | 0 | 0 | Repressed |
| 678 | GAJATE_RESPONSE_TO TRABECTEDIN_DN                           | -1.74 | 2.33 | 0 | 0 | 0 | Repressed |
| 679 | GO_MEMBRANE_RAFT_ASSEMBLY                                   | -1.74 | 2.19 | 0 | 0 | 0 | Repressed |
| 680 | WANG_NFKB_TARGETS                                           | -1.74 | 2.18 | 0 | 0 | 0 | Repressed |
| 681 | REACTOME_GLUKAGON LIKE PEPTIDE 1 GLP1 REGULATES INSULIN S   | -1.74 | 2.13 | 0 | 0 | 0 | Repressed |
| 682 | GO_WATER_SOLUBLE_VITAMIN_BIOSYNTHETIC_PROCESS               | -1.74 | 2.05 | 0 | 0 | 0 | Repressed |
| 683 | GO_CELLULAR_RESPONSE_TO_DEXAMETHASONE_STIMULUS              | -1.74 | 2.02 | 0 | 0 | 0 | Repressed |
| 684 | GO_LOW_DENSITY_LIPOPROTEIN_PARTICLE_CLEARANCE               | -1.74 | 1.93 | 0 | 0 | 0 | Repressed |
| 685 | GROSS_HIF1A_TARGETS_DN                                      | -1.74 | 1.93 | 0 | 0 | 0 | Repressed |
| 686 | BOQUEST_STEM_CELL_CULTURED_VS_FRESH_UP                      | -1.73 | 4.00 | 0 | 0 | 0 | Repressed |
| 687 | GO_REGULATION_OF_HEMATOPOIETIC_PROGENITOR_CELL_DIFFEREN     | -1.73 | 4.00 | 0 | 0 | 0 | Repressed |
| 688 | HALLMARK_FATTY_ACID_METABOLISM                              | -1.73 | 4.00 | 0 | 0 | 0 | Repressed |
| 689 | JUBAN_TARGETS_OF_SPI1_AND_FL11_DN                           | -1.73 | 4.00 | 0 | 0 | 0 | Repressed |
| 690 | NIELSEN_GIST_AND_SYNOVIAL_SARCOMA_DN                        | -1.73 | 4.00 | 0 | 0 | 0 | Repressed |
| 691 | REACTOME_DNA_REPLICATION                                    | -1.73 | 4.00 | 0 | 0 | 0 | Repressed |
| 692 | REACTOME_INTERLEUKIN_1_FAMILY_SIGNALING                     | -1.73 | 4.00 | 0 | 0 | 0 | Repressed |
| 693 | REACTOME_PLATELET_ACTIVATION_SIGNALING_AND_AGGREGATION      | -1.73 | 4.00 | 0 | 0 | 0 | Repressed |
| 694 | VANTVEER_BREAST_CANCER_ESR1_DN                              | -1.73 | 4.00 | 0 | 0 | 0 | Repressed |
| 695 | WELCSH_BRCA1_TARGETS_DN                                     | -1.73 | 4.00 | 0 | 0 | 0 | Repressed |
| 696 | ZHU_CMV_ALL_UP                                              | -1.73 | 4.00 | 0 | 0 | 0 | Repressed |
| 697 | GO_POSITIVE_REGULATION_OF_RYANODINE_SENSITIVE_CALCIIUM_RELE | -1.73 | 2.66 | 0 | 0 | 0 | Repressed |
| 698 | GO_AMINO_ACID_BINDING                                       | -1.73 | 2.56 | 0 | 0 | 0 | Repressed |
| 699 | SASAKI_ADULT_T_CELL_LEUKEMIA                                | -1.73 | 2.46 | 0 | 0 | 0 | Repressed |
| 700 | KUROZUMI_RESPONSE_TO_ONCOCYTIC_VIRUS                        | -1.73 | 2.34 | 0 | 0 | 0 | Repressed |
| 701 | GO_ACTIVATION_OF_ADENYLATE_CYCLASE_ACTIVITY                 | -1.73 | 2.32 | 0 | 0 | 0 | Repressed |
| 702 | GO_REGULATION_OF_SECONDARY_METABOLIC_PROCESS                | -1.73 | 2.32 | 0 | 0 | 0 | Repressed |
| 703 | BASSO_HAIRY_CELL_LEUKEMIA_UP                                | -1.73 | 2.28 | 0 | 0 | 0 | Repressed |
| 704 | REACTOME_OPIOID_SIGNALING                                   | -1.73 | 2.27 | 0 | 0 | 0 | Repressed |
| 705 | GO_SNRNA_TRANSCRIPTION                                      | -1.73 | 2.24 | 0 | 0 | 0 | Repressed |
| 706 | XU_HGF_SIGNALING_NOT_VIA_AKT1_48HR_DN                       | -1.73 | 2.15 | 0 | 0 | 0 | Repressed |
| 707 | GO_CELLULAR_RESPONSE_TO ESTRADIOL_STIMULUS                  | -1.73 | 2.01 | 0 | 0 | 0 | Repressed |
| 708 | HORTON_SREBF_TARGETS                                        | -1.73 | 2.01 | 0 | 0 | 0 | Repressed |
| 709 | KORKOLA_EMBRYONIC_CARCINOMA_VS_SEMINOMA_DN                  | -1.73 | 1.97 | 0 | 0 | 0 | Repressed |
| 710 | LINDGREN_BLADDER_CANCER_HIGH_RECURRENCE                     | -1.73 | 1.96 | 0 | 0 | 0 | Repressed |
| 711 | REACTOME_ATF6_ATF6_ALPHA_ACTIVATES_CHAPERONES               | -1.73 | 1.88 | 0 | 0 | 0 | Repressed |
| 712 | REACTOME_SIGNALING_BY_FGFR2_IIIA_TM                         | -1.73 | 1.85 | 0 | 0 | 0 | Repressed |
| 713 | GO_NEGATIVE_REGULATION_OF_LYASE_ACTIVITY                    | -1.73 | 1.81 | 0 | 0 | 0 | Repressed |
| 714 | GO_POSITIVE_REGULATION_OF_VIRAL_PROCESS                     | -1.72 | 4.00 | 0 | 0 | 0 | Repressed |
| 715 | GO_REGULATION_OF_LIPID_BIOSYNTHETIC_PROCESS                 | -1.72 | 4.00 | 0 | 0 | 0 | Repressed |
| 716 | JOHANSSON_GLIOMAGENESIS_BY_PDGF_B_UP                        | -1.72 | 4.00 | 0 | 0 | 0 | Repressed |
| 717 | SCHLOSSER_MYC_TARGETS_AND_SERUM_RESPONSE_UP                 | -1.72 | 2.60 | 0 | 1 | 0 | Repressed |
| 718 | GO_ENDOPLASMIC_RETICULUM_CHAPERONE_COMPLEX                  | -1.72 | 2.34 | 0 | 0 | 0 | Repressed |
| 719 | GO_AMIDE_TRANSMEMBRANE_TRANSPORTER_ACTIVITY                 | -1.72 | 2.30 | 0 | 0 | 0 | Repressed |
| 720 | SARTIPY_NORMAL_AT_INSULIN_RESISTANCE_UP                     | -1.72 | 2.30 | 0 | 0 | 0 | Repressed |
| 721 | GO_MICROBODY_LUMEN                                          | -1.72 | 2.29 | 0 | 0 | 0 | Repressed |
| 722 | JIANG_AGING_CEREBRAL_CORTEX_DN                              | -1.72 | 2.29 | 0 | 0 | 0 | Repressed |
| 723 | GO_PODOSOME                                                 | -1.72 | 2.28 | 0 | 0 | 0 | Repressed |
| 724 | GO_NCRNA_3_END_PROCESSING                                   | -1.72 | 2.13 | 0 | 0 | 0 | Repressed |
| 725 | KEGG_FATTY_ACID_METABOLISM                                  | -1.72 | 2.13 | 0 | 0 | 0 | Repressed |
| 726 | GESERICK_TERT_TARGETS_DN                                    | -1.72 | 2.04 | 0 | 0 | 0 | Repressed |
| 727 | GO_REGULATION_OF_LOW_DENSITY_LIPOPROTEIN_PARTICLE_CLEARA    | -1.72 | 2.04 | 0 | 0 | 0 | Repressed |
| 728 | GO_RIBONUCLEASE_P_COMPLEX                                   | -1.72 | 2.03 | 0 | 0 | 0 | Repressed |
| 729 | REACTOME_RNA_POLYMERASE_II_TRANSCRIPTION_ELONGATION         | -1.72 | 1.88 | 0 | 0 | 0 | Repressed |
| 730 | GO_DEFENSE_RESPONSE_TO_FUNGUS                               | -1.72 | 1.85 | 0 | 0 | 0 | Repressed |
| 731 | GO_COENZYME_METABOLIC_PROCESS                               | -1.71 | 4.00 | 0 | 0 | 0 | Repressed |
| 732 | GO_GLYCOLYTIC_PROCESS                                       | -1.71 | 4.00 | 0 | 0 | 0 | Repressed |
| 733 | GO_POSITIVE_REGULATION_OF_TRANSPORTER_ACTIVITY              | -1.71 | 4.00 | 0 | 0 | 0 | Repressed |
| 734 | GO_REGULATION_OF_MRNA_CATABOLIC_PROCESS                     | -1.71 | 4.00 | 0 | 0 | 0 | Repressed |
| 735 | GO_REGULATION_OF_STEM_CELL_DIFFERENTIATION                  | -1.71 | 4.00 | 0 | 0 | 0 | Repressed |
| 736 | MOREAUX_MULTIPLE_MYELOMA_BY_TACI_DN                         | -1.71 | 4.00 | 0 | 0 | 0 | Repressed |
| 737 | PID_ILK_PATHWAY                                             | -1.71 | 4.00 | 0 | 0 | 0 | Repressed |
| 738 | REACTOME_VISUAL_PHOTOTRANSDUCTION                           | -1.71 | 4.00 | 0 | 0 | 0 | Repressed |
| 739 | SANA_RESPONSE_TO_IFNG_DN                                    | -1.71 | 4.00 | 0 | 0 | 0 | Repressed |
| 740 | STEIN_ESRRA_TARGETS_UP                                      | -1.71 | 4.00 | 0 | 0 | 0 | Repressed |
| 741 | WIELAND_UP_BY_HBV_INFECTION                                 | -1.71 | 4.00 | 0 | 0 | 0 | Repressed |
| 742 | GO_STRUCTURAL_CONSTITUENT_OF_CYTOSKELETON                   | -1.71 | 2.59 | 0 | 0 | 0 | Repressed |
| 743 | ZHONG_SECRETOME_OF_LUNG_CANCER_AND_ENDOTHELIIUM             | -1.71 | 2.59 | 0 | 0 | 0 | Repressed |
| 744 | LIANG_HEMATOPOIESIS_STEM_CELL_NUMBER_LARGE_VS_TINY_UP       | -1.71 | 2.58 | 0 | 0 | 0 | Repressed |
| 745 | GRAHAM_CML_QUIESCENT_VS_NORMAL_QUIESCENT_UP                 | -1.71 | 2.57 | 0 | 0 | 0 | Repressed |
| 746 | GO_RNA_METHYLATION                                          | -1.71 | 2.55 | 0 | 0 | 0 | Repressed |
| 747 | REACTOME_RNA_POLYMERASE_II_TRANSCRIBES_SNRNA_GENES          | -1.71 | 2.53 | 0 | 0 | 0 | Repressed |
| 748 | GO_DOUBLE_STRANDED_RNA_BINDING                              | -1.71 | 2.52 | 0 | 0 | 0 | Repressed |
| 749 | GRAHAM_NORMAL_QUIESCENT_VS_NORMAL_DIVIDING_DN               | -1.71 | 2.51 | 0 | 0 | 0 | Repressed |
| 750 | HOLLEMAN_PREDNISOLONE_RESISTANCE_ALL_DN                     | -1.71 | 2.36 | 0 | 0 | 0 | Repressed |
| 751 | ZHAN_MULTIPLE_MYELOMA_PR_UP                                 | -1.71 | 2.28 | 0 | 0 | 0 | Repressed |



|     |                                                             |       |      |   |   |   |           |
|-----|-------------------------------------------------------------|-------|------|---|---|---|-----------|
| 752 | REACTOME_APC_C.CDC20_MEDIATED_DEGRADATION_OF_CYCLIN_B       | -1.71 | 2.27 | 0 | 0 | 0 | Repressed |
| 753 | GO_NOSE_DEVELOPMENT                                         | -1.71 | 2.22 | 0 | 0 | 0 | Repressed |
| 754 | GO_INFLAMMATORY_CELL_APOPTOTIC_PROCESS                      | -1.71 | 2.18 | 0 | 0 | 0 | Repressed |
| 755 | GO_PROTEASOME_ACTIVATING_ATPASE_ACTIVITY                    | -1.71 | 2.17 | 0 | 0 | 0 | Repressed |
| 756 | GO_PARASYMPATHETIC_NERVOUS_SYSTEM_DEVELOPMENT               | -1.71 | 2.16 | 0 | 0 | 0 | Repressed |
| 757 | REACTOME_RNA_POLYMERASE_III_TRANSCRIPTION_INITIATION_FROM_T | -1.71 | 2.12 | 0 | 0 | 0 | Repressed |
| 758 | GO_INTERFERON_BETA_BIOSYNTHETIC_PROCESS                     | -1.71 | 2.06 | 0 | 0 | 0 | Repressed |
| 759 | PEDERSEN_METASTASIS_BY_ERBB2_ISOFORM_6                      | -1.71 | 2.03 | 0 | 0 | 0 | Repressed |
| 760 | GO_VITAMIN_BIOSYNTHETIC_PROCESS                             | -1.71 | 2.02 | 0 | 0 | 0 | Repressed |
| 761 | GO_DIGESTION                                                | -1.71 | 1.98 | 0 | 0 | 0 | Repressed |
| 762 | GO_BOX_H_ACA_RNP_COMPLEX                                    | -1.71 | 1.97 | 0 | 0 | 0 | Repressed |
| 763 | REACTOME_FORMATION_OF_HIV_ELONGATION_COMPLEX_IN_THE_ABS     | -1.71 | 1.97 | 0 | 0 | 0 | Repressed |
| 764 | KEGG_BETA_ALANINE_METABOLISM                                | -1.71 | 1.94 | 0 | 0 | 0 | Repressed |
| 765 | RODRIGUES_NTN1_TARGETS_UP                                   | -1.71 | 1.86 | 0 | 0 | 0 | Repressed |
| 766 | GO_RIBOSOMAL_LARGE_SUBUNIT_EXPORT_FROM_NUCLEUS              | -1.71 | 1.84 | 0 | 0 | 0 | Repressed |
| 767 | LOPEZ_MESOTHELIOMA_SURVIVAL_OVERALL_DN                      | -1.71 | 1.82 | 0 | 0 | 0 | Repressed |
| 768 | GO_TRNA_5_END_PROCESSING                                    | -1.71 | 1.80 | 0 | 0 | 0 | Repressed |
| 769 | REACTOME_RECEPTOR_TYPE_TYROSINE_PROTEIN_PHOSPHATASES        | -1.71 | 1.80 | 0 | 0 | 0 | Repressed |
| 770 | GO_SEH1_ASSOCIATED_COMPLEX                                  | -1.71 | 1.57 | 0 | 0 | 0 | Repressed |
| 771 | BLALOCK_ALZHEIMERS_DISEASE_INCIPENT_DN                      | -1.70 | 4.00 | 0 | 0 | 0 | Repressed |
| 772 | DELYS_THYROID_CANCER_UP                                     | -1.70 | 4.00 | 0 | 0 | 0 | Repressed |
| 773 | GO_TELOMERE_MAINTENANCE_VIA_TELOMERE_LENGTHENING            | -1.70 | 4.00 | 0 | 0 | 0 | Repressed |
| 774 | IVANOVA_HEMATOPOIESIS_INTERMEDIATE_PROGENITOR               | -1.70 | 4.00 | 0 | 0 | 0 | Repressed |
| 775 | LEI_MYB_TARGETS                                             | -1.70 | 4.00 | 0 | 0 | 0 | Repressed |
| 776 | PID_PLK1_PATHWAY                                            | -1.70 | 4.00 | 0 | 0 | 0 | Repressed |
| 777 | SMITH_TERT_TARGETS_UP                                       | -1.70 | 4.00 | 0 | 0 | 0 | Repressed |
| 778 | REACTOME_NUCLEAR_IMPORT_OF_REV_PROTEIN                      | -1.70 | 2.57 | 0 | 0 | 0 | Repressed |
| 779 | HARRIS_HYPOXIA                                              | -1.70 | 2.55 | 0 | 0 | 0 | Repressed |
| 780 | LENAOUR_DENDRITIC_CELL_MATURATION_DN                        | -1.70 | 2.52 | 0 | 0 | 0 | Repressed |
| 781 | EGUCHI_CELL_CYCLE_RB1_TARGETS                               | -1.70 | 2.31 | 0 | 0 | 0 | Repressed |
| 782 | GO_FEMALE_GENITALIA_DEVELOPMENT                             | -1.70 | 2.19 | 0 | 0 | 0 | Repressed |
| 783 | SMD_BREAST_CANCER_RELAPSE_IN_PLEURA_DN                      | -1.70 | 2.19 | 0 | 0 | 0 | Repressed |
| 784 | GO_ACTIN_FILAMENT_BUNDLE                                    | -1.70 | 2.15 | 0 | 0 | 0 | Repressed |
| 785 | REACTOME_CRISTAE_FORMATION                                  | -1.70 | 2.05 | 0 | 0 | 0 | Repressed |
| 786 | REACTOME_CA_DEPENDENT_EVENTS                                | -1.70 | 2.00 | 0 | 0 | 0 | Repressed |
| 787 | GO_NEGATIVE_REGULATION_OF_GLIAI_CELL_PROLIFERATION          | -1.70 | 1.97 | 0 | 0 | 0 | Repressed |
| 788 | GO_MITOTIC_NUCLEAR_ENVELOPE_DISASSEMBLY                     | -1.70 | 1.96 | 0 | 0 | 0 | Repressed |
| 789 | REACTOME_FOLDING_OF_ACTIN_BY_CCT_TRIC                       | -1.70 | 1.96 | 0 | 0 | 0 | Repressed |
| 790 | GO_NITRIC_OXIDE_SYNTHASE_BINDING                            | -1.70 | 1.95 | 0 | 0 | 0 | Repressed |
| 791 | GO_BONE_GROWTH                                              | -1.70 | 1.93 | 0 | 0 | 0 | Repressed |
| 792 | REACTOME_GAP_JUNCTION_TRAFFICKING_AND_REGULATION            | -1.70 | 1.93 | 0 | 0 | 0 | Repressed |
| 793 | BIOCARTA_S1P_PATHWAY                                        | -1.70 | 1.90 | 0 | 0 | 0 | Repressed |
| 794 | GO_MITOCHONDRIAL_ELECTRON_TRANSPORT_UBIQUINOL_TO_CYTOC      | -1.70 | 1.87 | 0 | 0 | 0 | Repressed |
| 795 | GO_TRNA_CYTOSINE_METHYLTRANSFERASE_ACTIVITY                 | -1.70 | 1.83 | 1 | 0 | 0 | Repressed |
| 796 | GO_LONG_CHAIN_FATTY_ACID_COA_LIGASE_ACTIVITY                | -1.70 | 1.74 | 0 | 0 | 0 | Repressed |
| 797 | GO_MITOCHONDRIAL_CALCIIUM_ION_HOMEOSTASIS                   | -1.70 | 1.69 | 0 | 0 | 0 | Repressed |
| 798 | BILD_MYC_ONCOGENIC_SIGNATURE                                | -1.69 | 4.00 | 0 | 1 | 0 | Repressed |
| 799 | GO_POSITIVE_REGULATION_OF_ION_TRANSPORT                     | -1.69 | 4.00 | 0 | 0 | 0 | Repressed |
| 800 | GO_SMALL_MOLECULE_BIOSYNTHETIC_PROCESS                      | -1.69 | 4.00 | 0 | 0 | 0 | Repressed |
| 801 | REACTOME_SIGNALING_BY_WNT                                   | -1.69 | 4.00 | 0 | 0 | 0 | Repressed |
| 802 | REACTOME_TRANSPORT_OF_MATURE_MRNAS_DERIVED_FROM_INTROI      | -1.69 | 4.00 | 0 | 0 | 0 | Repressed |
| 803 | REACTOME_TRANSPORT_OF_MATURE_TRANSCRIPT_TO_CYTOPLASM        | -1.69 | 4.00 | 0 | 0 | 0 | Repressed |
| 804 | ELVIDGE_HIF1A_AND_HIF2A_TARGETS_DN                          | -1.69 | 2.55 | 0 | 0 | 0 | Repressed |
| 805 | REACTOME_CYTOSOLIC_SENSORS_OF_PATHOGEN_ASSOCIATED_DNA       | -1.69 | 2.54 | 0 | 0 | 0 | Repressed |
| 806 | DANG_REGULATED_BY_MYC_UP                                    | -1.69 | 2.53 | 0 | 0 | 0 | Repressed |
| 807 | GO_DIAPHRAGM_DEVELOPMENT                                    | -1.69 | 2.37 | 0 | 0 | 0 | Repressed |
| 808 | GO_CHEMOATTRACTANT_ACTIVITY                                 | -1.69 | 2.34 | 0 | 0 | 0 | Repressed |
| 809 | GO_NCRNA_EXPORT_FROM_NUCLEUS                                | -1.69 | 2.28 | 0 | 0 | 0 | Repressed |
| 810 | GO_OXIDOREDUCTASE_ACTIVITY_OXIDIZING_METAL_IONS             | -1.69 | 2.20 | 0 | 0 | 0 | Repressed |
| 811 | GO_REGENERATION                                             | -1.69 | 2.20 | 0 | 0 | 0 | Repressed |
| 812 | REACTOME_RRNA_PROCESSING_IN_THE_MITOCHONDRION               | -1.69 | 2.15 | 0 | 0 | 0 | Repressed |
| 813 | GRADE_METASTASIS_DN                                         | -1.69 | 2.10 | 0 | 0 | 0 | Repressed |
| 814 | GO_LOCOMOTOR_RHYTHM                                         | -1.69 | 2.05 | 0 | 0 | 0 | Repressed |
| 815 | GO_NEUROTRANSMITTER_BINDING                                 | -1.69 | 2.04 | 0 | 0 | 0 | Repressed |
| 816 | REACTOME_TRNA_MODIFICATION_IN_THE_MITOCHONDRION             | -1.69 | 2.03 | 0 | 0 | 0 | Repressed |
| 817 | REACTOME_CONVERSION_FROM_APC_C.CDC20_TO_APC_C.CDH1_IN_L     | -1.69 | 1.93 | 0 | 0 | 0 | Repressed |
| 818 | GO_MACROLIDE_BINDING                                        | -1.69 | 1.87 | 0 | 0 | 0 | Repressed |
| 819 | GO_REGULATION_OF_CARDIAC_MUSCLE_CONTRACTION_BY_REGULATI     | -1.69 | 1.86 | 0 | 0 | 0 | Repressed |
| 820 | DORMOY_ELAVL1_TARGETS                                       | -1.69 | 1.85 | 0 | 0 | 0 | Repressed |
| 821 | GO_POSITIVE_REGULATION_OF_POTASSIUM_ION_TRANSMEMBRANE_TR    | -1.69 | 1.80 | 0 | 0 | 0 | Repressed |
| 822 | OXFORD_RALA_TARGETS_UP                                      | -1.69 | 1.80 | 0 | 0 | 0 | Repressed |
| 823 | PID_HNF3B_PATHWAY                                           | -1.69 | 1.74 | 0 | 0 | 0 | Repressed |
| 824 | GO_INTEGRATOR_COMPLEX                                       | -1.69 | 1.70 | 0 | 0 | 0 | Repressed |
| 825 | GO_MITOTIC_SPINDLE_ORGANIZATION                             | -1.68 | 4.00 | 0 | 0 | 0 | Repressed |
| 826 | GO_REGULATION_OF_MORPHOGENESIS_OF_AN_EPITHELIUM             | -1.68 | 4.00 | 0 | 0 | 0 | Repressed |
| 827 | HALLMARK_PI3K_AKT_MTOR_SIGNALING                            | -1.68 | 4.00 | 0 | 0 | 0 | Repressed |
| 828 | LASTOWSKA_NEUROBLASTOMA_COPY_NUMBER_UP                      | -1.68 | 4.00 | 0 | 0 | 0 | Repressed |
| 829 | MARTORIATI_MDM4_TARGETS_NEUROEPITHELIUM_UP                  | -1.68 | 4.00 | 0 | 0 | 0 | Repressed |
| 830 | ROSS_LEUKEMIA_WITH_MLL_FUSIONS                              | -1.68 | 4.00 | 0 | 0 | 0 | Repressed |
| 831 | GO_REGULATION_OF_SYNAPSE_MATURATION                         | -1.68 | 2.65 | 0 | 0 | 0 | Repressed |
| 832 | REACTOME_RNA_POLYMERASE_III_TRANSCRIPTION                   | -1.68 | 2.56 | 0 | 0 | 0 | Repressed |
| 833 | RAMASWAMY_METASTASIS_UP                                     | -1.68 | 2.55 | 0 | 0 | 0 | Repressed |
| 834 | GO_BRUSH_BORDER                                             | -1.68 | 2.53 | 0 | 0 | 0 | Repressed |
| 835 | ZHJ_CMV_24_HR_UP                                            | -1.68 | 2.52 | 0 | 0 | 0 | Repressed |
| 836 | GO_POSITIVE_REGULATION_OF_ASPARTIC_TYPE_PEPTIDASE_ACTIVITY  | -1.68 | 2.35 | 0 | 0 | 0 | Repressed |
| 837 | FARMER_BREAST_CANCER_CLUSTER_1                              | -1.68 | 2.26 | 0 | 0 | 0 | Repressed |
| 838 | WEST_ADRENOCORITICAL_TUMOR_MARKERS_UP                       | -1.68 | 2.15 | 0 | 0 | 0 | Repressed |
| 839 | REACTOME_PYRUVATE_METABOLISM_AND_CITRIC_ACID_TCA_CYCLE      | -1.68 | 2.10 | 0 | 0 | 0 | Repressed |
| 840 | REACTOME_ERKS_ARE_INACTIVATED                               | -1.68 | 2.05 | 0 | 0 | 0 | Repressed |
| 841 | GO_FRUCTOSE_METABOLIC_PROCESS                               | -1.68 | 2.02 | 0 | 0 | 0 | Repressed |
| 842 | GO_GROWTH_INVOLVED_IN_SYMBIOTIC_INTERACTION                 | -1.68 | 1.96 | 0 | 0 | 0 | Repressed |
| 843 | GO_AMINOACYL_TRNA_SYNTHETASE_MULTIZENZYME_COMPLEX           | -1.68 | 1.94 | 0 | 0 | 0 | Repressed |
| 844 | BIOCARTA_NDKDYNAMIN_PATHWAY                                 | -1.68 | 1.93 | 0 | 0 | 0 | Repressed |
| 845 | KANG_GLS3_TARGETS                                           | -1.68 | 1.85 | 0 | 0 | 0 | Repressed |
| 846 | LANDIS_ERBB2_BREAST_TUMORS_65_UP                            | -1.68 | 1.85 | 0 | 0 | 0 | Repressed |
| 847 | GO_CONDENSED_CHROMOSOME_OUTER_KINETOCHORE                   | -1.68 | 1.82 | 0 | 0 | 0 | Repressed |
| 848 | GO_PROTEIN_ARGININE_N_METHYLTRANSFERASE_ACTIVITY            | -1.68 | 1.80 | 0 | 0 | 0 | Repressed |
| 849 | GO_TRNA_5_LEADER_REMOVAL                                    | -1.68 | 1.76 | 0 | 0 | 0 | Repressed |
| 850 | GO_REGULATION_OF_PROTEIN_FOLDING                            | -1.68 | 1.74 | 0 | 0 | 0 | Repressed |
| 851 | GO_RESPONSE_TO_REDOX_STATE                                  | -1.68 | 1.73 | 0 | 0 | 0 | Repressed |
| 852 | BOYALUT_LIVER_CANCER_SUBCLASS_G2                            | -1.68 | 1.67 | 0 | 0 | 0 | Repressed |
| 853 | LOPEZ_MESOTELIOMA_SURVIVAL_TIME_UP                          | -1.68 | 1.63 | 0 | 0 | 0 | Repressed |
| 854 | CONCANNON_APOPTOSIS_BY_EPOXOMICIN_UP                        | -1.67 | 4.00 | 0 | 0 | 0 | Repressed |
| 855 | GO_AZUROPHIL_GNANULE_LUMEN                                  | -1.67 | 4.00 | 0 | 0 | 0 | Repressed |
| 856 | GO_CELLULAR_COMPONENT_DISASSEMBLY                           | -1.67 | 4.00 | 0 | 0 | 0 | Repressed |
| 857 | GO_COFACTOR_METABOLIC_PROCESS                               | -1.67 | 4.00 | 0 | 0 | 0 | Repressed |
| 858 | GO_NUCLEAR_TRANSPORT                                        | -1.67 | 4.00 | 0 | 0 | 0 | Repressed |
| 859 | GO_NUCLEOLAR_PART                                           | -1.67 | 4.00 | 0 | 0 | 0 | Repressed |
| 860 | GO_RIBONUCLEOPROTEIN_COMPLEX_BINDING                        | -1.67 | 4.00 | 0 | 0 | 0 | Repressed |

|     |                                                             |       |      |   |   |   |           |
|-----|-------------------------------------------------------------|-------|------|---|---|---|-----------|
| 861 | LINDGREN BLADDER_CANCER_CLUSTER_3_UP                        | -1.67 | 4.00 | 0 | 0 | 0 | Repressed |
| 862 | WATANABE_RECTAL_CANCER_RADIOOTHERAPY_RESPONSIVE_DN          | -1.67 | 4.00 | 0 | 0 | 0 | Repressed |
| 863 | ZHANG_TLX_TARGETS_36HR_DN                                   | -1.67 | 4.00 | 0 | 0 | 0 | Repressed |
| 864 | FERRANDO_T_ALL_WITH_MLL_ENL_FUSION_DN                       | -1.67 | 2.54 | 0 | 0 | 0 | Repressed |
| 865 | MORI_SMALL_PRE_BIL_LYMPHOCYTE_DN                            | -1.67 | 2.53 | 0 | 0 | 0 | Repressed |
| 866 | GO_MONOCARBOXYLIC_ACID_BIOSYNTHETIC_PROCESS                 | -1.67 | 2.51 | 0 | 0 | 0 | Repressed |
| 867 | GO_EUKARYOTIC_TRANSLATION_INITIATION_FACTOR_2B_COMPLEX      | -1.67 | 2.35 | 0 | 0 | 0 | Repressed |
| 868 | CROMER_METASTASIS_DN                                        | -1.67 | 2.30 | 0 | 0 | 0 | Repressed |
| 869 | ALK_DN.V1_UP                                                | -1.67 | 2.28 | 0 | 0 | 0 | Repressed |
| 870 | ONO_AML1_TARGETS_DN                                         | -1.67 | 2.13 | 0 | 0 | 0 | Repressed |
| 871 | REACTOME_MITOCHONDRIAL_TRNA_AMINOACYLATION                  | -1.67 | 2.04 | 0 | 0 | 0 | Repressed |
| 872 | BURTON_ADIPOGENESIS_4                                       | -1.67 | 1.99 | 0 | 0 | 0 | Repressed |
| 873 | GO_MODULATION_OF_GROWTH_OF_SYMBIONT_INVOLVED_IN_INTERAC     | -1.67 | 1.94 | 0 | 0 | 0 | Repressed |
| 874 | GO_ANTIBIOTIC_CATABOLIC_PROCESS                             | -1.67 | 1.91 | 0 | 0 | 0 | Repressed |
| 875 | GO_FATTY_ACID_DERIVATIVE_BIOSYNTHETIC_PROCESS               | -1.67 | 1.91 | 0 | 0 | 0 | Repressed |
| 876 | GO_NEGATIVE_REGULATION_OF_ADENYLATE_CYCLASE_ACTIVITY        | -1.67 | 1.87 | 0 | 0 | 0 | Repressed |
| 877 | GO_MEMBRANE_DISASSEMBLY                                     | -1.67 | 1.85 | 0 | 0 | 0 | Repressed |
| 878 | BIOCARTA_SM_PATHWAY                                         | -1.67 | 1.82 | 0 | 0 | 0 | Repressed |
| 879 | GO_TFIIID_CLASS_TRANSCRIPTION_FACTOR_COMPLEX_BINDING        | -1.67 | 1.82 | 0 | 0 | 0 | Repressed |
| 880 | BIOCARTA_GCR_PATHWAY                                        | -1.67 | 1.80 | 0 | 0 | 0 | Repressed |
| 881 | LOPEZ_MBD_TARGETS_IMPRINTED_AND_X_LINKED                    | -1.67 | 1.77 | 0 | 0 | 0 | Repressed |
| 882 | REACTOME_GLUcAGON_SIGNALING_IN_METABOLIC_REGULATION         | -1.67 | 1.75 | 0 | 0 | 0 | Repressed |
| 883 | REACTOME_CITRIC_ACID_CYCLE_TCA_CYCLE                        | -1.67 | 1.72 | 0 | 0 | 0 | Repressed |
| 884 | GO_ENDOLYSOSOME_MEMBRANE                                    | -1.67 | 1.69 | 0 | 0 | 0 | Repressed |
| 885 | GO_GATOR2_COMPLEX                                           | -1.67 | 1.69 | 0 | 0 | 0 | Repressed |
| 886 | GO_PROTEIN_COFACTOR_LINKAGE                                 | -1.67 | 1.68 | 0 | 0 | 0 | Repressed |
| 887 | GO_REGULATION_OF_APOPTOTIC_DNA_FRAGMENTATION                | -1.67 | 1.66 | 0 | 0 | 0 | Repressed |
| 888 | YAO_TEMPORAL_RESPONSE_TO_PROGESTERONE_CLUSTER_5             | -1.67 | 1.63 | 0 | 0 | 0 | Repressed |
| 889 | GO_CELLULAR_RESPONSE_TO_OXYGEN_LEVELS                       | -1.66 | 4.00 | 0 | 0 | 0 | Repressed |
| 890 | GO_NUCLEOTIDYLTRANSFERASE_ACTIVITY                          | -1.66 | 4.00 | 0 | 0 | 0 | Repressed |
| 891 | GO_RESPONSE_TO_ORGANIC_CYCLIC_COMPOUND                      | -1.66 | 4.00 | 0 | 0 | 0 | Repressed |
| 892 | GO_NUCLEOSIDE_BISPHOSPHATE_BIOSYNTHETIC_PROCESS             | -1.66 | 2.56 | 0 | 0 | 0 | Repressed |
| 893 | GO_NUCLEAR_PORE                                             | -1.66 | 2.55 | 0 | 0 | 0 | Repressed |
| 894 | GOTZMANN_EPITHELIAL_TO_MESENCHYMAL_TRANSITION_DN            | -1.66 | 2.48 | 0 | 0 | 0 | Repressed |
| 895 | HALLMARK_ADIPOGENESIS                                       | -1.66 | 2.47 | 0 | 0 | 0 | Repressed |
| 896 | WANG_CISPLATIN_RESPONSE_AND_XPC_UP                          | -1.66 | 2.46 | 0 | 0 | 0 | Repressed |
| 897 | GO_TELOMERASE_RNA_BINDING                                   | -1.66 | 2.31 | 0 | 0 | 0 | Repressed |
| 898 | KEGG_RNA_POLYMERASE                                         | -1.66 | 2.31 | 0 | 0 | 0 | Repressed |
| 899 | GO_STRIATED_MUSCLE_CONTRACTION                              | -1.66 | 2.26 | 0 | 0 | 0 | Repressed |
| 900 | REACTOME_ANTIVIRAL_MECHANISM_BY_IFN_STIMULATED_GENES        | -1.66 | 2.25 | 0 | 0 | 0 | Repressed |
| 901 | GO_CHROMOSOME_PASSENGER_COMPLEX                             | -1.66 | 2.06 | 0 | 0 | 0 | Repressed |
| 902 | GO_BOX_H_ACA_SNORNA_BINDING                                 | -1.66 | 2.04 | 0 | 0 | 0 | Repressed |
| 903 | GO_ATP_DEPENDENT_5_3_DNA_HELICASE_ACTIVITY                  | -1.66 | 1.97 | 0 | 0 | 0 | Repressed |
| 904 | GO_REGULATION_OF_CALCMIUM_TRANSPORTING_ATPASE_ACTIVITY      | -1.66 | 1.95 | 0 | 0 | 0 | Repressed |
| 905 | GO_GLOMERULUS_DEVELOPMENT                                   | -1.66 | 1.92 | 0 | 0 | 0 | Repressed |
| 906 | PID_HDAC_CLASSIII_PATHWAY                                   | -1.66 | 1.92 | 0 | 0 | 0 | Repressed |
| 907 | REACTOME_DEFECTIVE_TPR_MAY_CONFER_SUSCEPTIBILITY_TOWARDI    | -1.66 | 1.90 | 0 | 0 | 0 | Repressed |
| 908 | CAIRO_PML_TARGETS_BOUND_BY_MYC_UP                           | -1.66 | 1.86 | 0 | 0 | 0 | Repressed |
| 909 | AMIT_SERUM_RESPONSE_240_MCF10A                              | -1.66 | 1.85 | 0 | 0 | 0 | Repressed |
| 910 | GO_CHONDROITIN_SULFATE_BINDING                              | -1.66 | 1.84 | 0 | 0 | 0 | Repressed |
| 911 | GO_RESPONSE_TO_DEXAMETHASONE                                | -1.66 | 1.80 | 0 | 0 | 0 | Repressed |
| 912 | REACTOME_REGULATION_OF_GLYCOLYSIS_BY_FRUCTOSE_2_6_BISPH     | -1.66 | 1.79 | 0 | 0 | 0 | Repressed |
| 913 | BIOCARTA_G2_PATHWAY                                         | -1.66 | 1.75 | 0 | 0 | 0 | Repressed |
| 914 | BIOCARTA_EGFR_SMRTN_PATHWAY                                 | -1.66 | 1.74 | 0 | 0 | 0 | Repressed |
| 915 | GO_SERINE_FAMILY_AMINO_ACID_METABOLIC_PROCESS               | -1.66 | 1.72 | 0 | 0 | 0 | Repressed |
| 916 | KEGG_PRION_DISEASES                                         | -1.66 | 1.72 | 0 | 0 | 0 | Repressed |
| 917 | NIKOLSKY_OVERCONNECTED_IN_BREAST_CANCER                     | -1.66 | 1.72 | 0 | 0 | 0 | Repressed |
| 918 | GO_POTASSIUM_ION_BINDING                                    | -1.66 | 1.68 | 0 | 0 | 0 | Repressed |
| 919 | GO_REGULATION_OF_LIPOPROTEIN_PARTICLE_CLEARANCE             | -1.66 | 1.58 | 0 | 0 | 0 | Repressed |
| 920 | GO_PEPTIDYL_ARGININE_N_METHYLATION                          | -1.66 | 1.55 | 0 | 0 | 0 | Repressed |
| 921 | AFFAR_YY1_TARGETS_DN                                        | -1.65 | 4.00 | 0 | 0 | 0 | Repressed |
| 922 | GO_CADHERIN_BINDING                                         | -1.65 | 4.00 | 0 | 0 | 0 | Repressed |
| 923 | GO_CATALYTIC_STEP_2_SPLICEOSOME                             | -1.65 | 4.00 | 0 | 0 | 0 | Repressed |
| 924 | GO_REGULATION_OF_CATION_TRANSMEMBRANE_TRANSPORT             | -1.65 | 4.00 | 0 | 0 | 0 | Repressed |
| 925 | GO_REGULATION_OF_POSTTRANSCRIPTIONAL_GENE_SILENCING         | -1.65 | 4.00 | 0 | 0 | 0 | Repressed |
| 926 | GO_REGULATION_OF_STEROID_BIOSYNTHETIC_PROCESS               | -1.65 | 4.00 | 0 | 0 | 0 | Repressed |
| 927 | GO_RESPONSE_TO_HEAT                                         | -1.65 | 4.00 | 0 | 0 | 0 | Repressed |
| 928 | GO_RESPONSE_TO_TEMPERATURE_STIMULUS                         | -1.65 | 4.00 | 0 | 0 | 0 | Repressed |
| 929 | GO_SMALL_MOLECULE_METABOLIC_PROCESS                         | -1.65 | 4.00 | 0 | 0 | 0 | Repressed |
| 930 | HELLER_HDAC_TARGETS_DN                                      | -1.65 | 4.00 | 0 | 0 | 0 | Repressed |
| 931 | LI_WILMS_TUMOR_VS_FETAL_KIDNEY_1_UP                         | -1.65 | 4.00 | 0 | 0 | 0 | Repressed |
| 932 | REACTOME_UB_SPECIFIC_PROCESSING_PROTEASES                   | -1.65 | 4.00 | 0 | 0 | 0 | Repressed |
| 933 | GO_PROTEIN_LOCALIZATION_TO_CELL_SURFACE                     | -1.65 | 2.58 | 0 | 0 | 0 | Repressed |
| 934 | REACTOME_RNA_POLYMERASE_III_TRANSCRIPTION_INITIATION_FROM_T | -1.65 | 2.58 | 0 | 0 | 0 | Repressed |
| 935 | MARTINEZ_RESPONSE_TO TRABECTEDIN_UP                         | -1.65 | 2.55 | 0 | 0 | 0 | Repressed |
| 936 | MARZEC_IL2_SIGNALING_UP                                     | -1.65 | 2.54 | 0 | 0 | 0 | Repressed |
| 937 | TARTE_PLASMA_CELL_VS_B_LYMPHOCYTE_UP                        | -1.65 | 2.54 | 0 | 0 | 0 | Repressed |
| 938 | GO_ORGANIC_ACID_BINDING                                     | -1.65 | 2.53 | 0 | 0 | 0 | Repressed |
| 939 | ANDERSEN_CHOLANGIOCARCINOMA_CLASS2                          | -1.65 | 2.26 | 0 | 0 | 0 | Repressed |
| 940 | GO_NEUTROPHIL_APOPTOTIC_PROCESS                             | -1.65 | 2.18 | 0 | 0 | 0 | Repressed |
| 941 | GO_REGULATION_OF_CHONDROCYTE_DIFFERENTIATION                | -1.65 | 2.18 | 0 | 0 | 0 | Repressed |
| 942 | GO_MOLECULAR_CARRIER_ACTIVITY                               | -1.65 | 2.13 | 0 | 0 | 0 | Repressed |
| 943 | SERVITJA_ISLET_HNF1A_TARGETS_DN                             | -1.65 | 2.12 | 0 | 0 | 0 | Repressed |
| 944 | REACTOME_INTRAFLAGELLAR_TRANSPORT                           | -1.65 | 2.10 | 0 | 0 | 0 | Repressed |
| 945 | DACOSTA_LOW_DOSE_UV_RESPONSE_VIA_ERCC3_XPCS_DN              | -1.65 | 2.05 | 0 | 0 | 0 | Repressed |
| 946 | GO_MATURATION_OF_SSU_RRNA_FROM_TRICISTRONIC_RRNA_TRANSC     | -1.65 | 1.99 | 0 | 0 | 0 | Repressed |
| 947 | GO_RRNA_TRANSCRIPTION                                       | -1.65 | 1.98 | 0 | 0 | 0 | Repressed |
| 948 | KEGG_BASAL_TRANSCRIPTION_FACTORS                            | -1.65 | 1.97 | 0 | 0 | 0 | Repressed |
| 949 | GO_RRNA_PSEUDOURIDINE_SYNTHESIS                             | -1.65 | 1.95 | 0 | 0 | 0 | Repressed |
| 950 | REACTOME_G_PROTEIN_ACTIVATION                               | -1.65 | 1.93 | 0 | 0 | 0 | Repressed |
| 951 | BIOCARTA_NKT_PATHWAY                                        | -1.65 | 1.82 | 0 | 0 | 0 | Repressed |
| 952 | REACTOME_SCAVENGING_BY_CLASS_F_RECEPTORS                    | -1.65 | 1.82 | 0 | 0 | 0 | Repressed |
| 953 | GO_NADH_METABOLIC_PROCESS                                   | -1.65 | 1.81 | 0 | 0 | 0 | Repressed |
| 954 | GO_NITRIC_OXIDE_SYNTHASE_REGULATOR_ACTIVITY                 | -1.65 | 1.76 | 0 | 0 | 0 | Repressed |
| 955 | GO_C_X_C_CHEMOKINE_RECEPTOR_ACTIVITY                        | -1.65 | 1.73 | 0 | 0 | 0 | Repressed |
| 956 | CHR6P24                                                     | -1.65 | 1.72 | 0 | 0 | 0 | Repressed |
| 957 | GO_ATF6_MEDIATED_UNFOLDED_PROTEIN_RESPONSE                  | -1.65 | 1.69 | 0 | 0 | 0 | Repressed |
| 958 | GO_COLLAGEN_FIBRIL_ORGANIZATION                             | -1.65 | 1.69 | 0 | 0 | 0 | Repressed |
| 959 | GO_OLFACTORY_LOBE_DEVELOPMENT                               | -1.65 | 1.69 | 0 | 0 | 0 | Repressed |
| 960 | KEGG_PHENYLALANINE_METABOLISM                               | -1.65 | 1.69 | 0 | 0 | 0 | Repressed |
| 961 | REACTOME_RNA_POLYMERASE_III_CHAIN_ELONGATION                | -1.65 | 1.59 | 0 | 0 | 0 | Repressed |
| 962 | GO_INTRACELLULAR_STEROL_TRANSPORT                           | -1.65 | 1.51 | 0 | 0 | 0 | Repressed |
| 963 | BENPORATH_ES_1                                              | -1.64 | 4.00 | 0 | 0 | 0 | Repressed |
| 964 | BURTON_ADIPOGENESIS_3                                       | -1.64 | 4.00 | 0 | 0 | 0 | Repressed |
| 965 | DUTERTRE ESTRADIOL_RESPONSE_6HR_UP                          | -1.64 | 4.00 | 0 | 0 | 0 | Repressed |
| 966 | FLECHNER_BIOPSY_KIDNEY_TRANSPLANT_REJECTED_VS_OK_DN         | -1.64 | 4.00 | 0 | 0 | 0 | Repressed |
| 967 | GO_CELL_CYCLE_G2_M_PHASE_TRANSITION                         | -1.64 | 4.00 | 0 | 0 | 0 | Repressed |
| 968 | GO_CONTRACTILE_FIBER                                        | -1.64 | 4.00 | 0 | 0 | 0 | Repressed |
| 969 | GO_FICOLIN_1_RICH GRANULE                                   | -1.64 | 4.00 | 0 | 0 | 0 | Repressed |

|      |                                                           |       |      |   |   |   |           |
|------|-----------------------------------------------------------|-------|------|---|---|---|-----------|
| 970  | GO_REGULATION_OF_METAL_ION_TRANSPORT                      | -1.64 | 4.00 | 0 | 0 | 0 | Repressed |
| 971  | GO_RESPONSE_TO_STEROID_HORMONE                            | -1.64 | 4.00 | 0 | 0 | 0 | Repressed |
| 972  | GO_RNA_3_END_PROCESSING                                   | -1.64 | 4.00 | 0 | 0 | 0 | Repressed |
| 973  | GO_SULFUR_COMPOUND_METABOLIC_PROCESS                      | -1.64 | 4.00 | 0 | 0 | 0 | Repressed |
| 974  | LINDGREN_BLABDER_CANCER_CLUSTER_1_DN                      | -1.64 | 4.00 | 0 | 0 | 0 | Repressed |
| 975  | REACTOME_CELL_CYCLE_MITOTIC                               | -1.64 | 4.00 | 0 | 0 | 0 | Repressed |
| 976  | REACTOME_PROTEIN_FOLDING                                  | -1.64 | 4.00 | 0 | 0 | 0 | Repressed |
| 977  | REACTOME_PROTEIN_LOCALIZATION                             | -1.64 | 4.00 | 0 | 0 | 0 | Repressed |
| 978  | GO_DIGESTIVE_SYSTEM_PROCESS                               | -1.64 | 2.29 | 0 | 0 | 0 | Repressed |
| 979  | REACTOME_REGULATION_OF_INSULIN_SECRETION                  | -1.64 | 2.29 | 0 | 0 | 0 | Repressed |
| 980  | GO_NUCLEAR_RECEPTOR_TRANSCRIPTION_COACTIVATOR_ACTIVITY    | -1.64 | 2.27 | 0 | 0 | 0 | Repressed |
| 981  | GO_MATURATION_OF_SSU_RRNA                                 | -1.64 | 2.02 | 0 | 0 | 0 | Repressed |
| 982  | GO_REGULATION_OF_RESPONSE_TO_REACTIVE_OXYGEN_SPECIES      | -1.64 | 2.01 | 0 | 0 | 0 | Repressed |
| 983  | GO_TRICARBOXYLIC_ACID_CYCLE                               | -1.64 | 1.98 | 0 | 0 | 0 | Repressed |
| 984  | GO_HISTONE_SERINE_KINASE_ACTIVITY                         | -1.64 | 1.89 | 0 | 0 | 0 | Repressed |
| 985  | HADDAD_T_LYMPHOCYTE_AND_NK_PROGENITOR_DN                  | -1.64 | 1.89 | 0 | 0 | 0 | Repressed |
| 986  | GO_CHROMATOID_BODY                                        | -1.64 | 1.82 | 0 | 0 | 0 | Repressed |
| 987  | PEDERSEN_METASTASIS_BY_ERBB2_ISOFORM_1                    | -1.64 | 1.79 | 0 | 0 | 0 | Repressed |
| 988  | REACTOME_AQUAPORIN_MEDIATED_TRANSPORT                     | -1.64 | 1.78 | 0 | 0 | 0 | Repressed |
| 989  | GO_AEROBIC_ELECTRON_TRANSPORT_CHAIN                       | -1.64 | 1.75 | 0 | 0 | 0 | Repressed |
| 990  | CHR8P23                                                   | -1.64 | 1.73 | 0 | 0 | 0 | Repressed |
| 991  | DAVIES_MULTIPLE_MYELOMA_VS_MGUS_DN                        | -1.64 | 1.73 | 0 | 0 | 0 | Repressed |
| 992  | GO_MITOCHONDRIAL_TRNA_PROCESSING                          | -1.64 | 1.73 | 0 | 0 | 0 | Repressed |
| 993  | GO_PEROXIREDOXIN_ACTIVITY                                 | -1.64 | 1.73 | 0 | 0 | 0 | Repressed |
| 994  | GO_GOLGI_LOCALIZATION                                     | -1.64 | 1.72 | 0 | 0 | 0 | Repressed |
| 995  | GO_NEGATIVE_REGULATION_OF_MRNA_SPLICING_VIA_SPLICEOSOME   | -1.64 | 1.72 | 0 | 0 | 0 | Repressed |
| 996  | REACTOME_RNA_POLYMERASE_III_TRANSCRIPTION_TERMINATION     | -1.64 | 1.68 | 0 | 0 | 0 | Repressed |
| 997  | GO_GROWTH_PLATE_CARTILAGE_DEVELOPMENT                     | -1.64 | 1.67 | 0 | 0 | 0 | Repressed |
| 998  | GO_PSEUDOURIDINE_SYNTHESIS                                | -1.64 | 1.67 | 0 | 0 | 0 | Repressed |
| 999  | GO_PEPTIDE_DISULFIDE_OXIDOREDUCTASE_ACTIVITY              | -1.64 | 1.66 | 0 | 0 | 0 | Repressed |
| 1000 | KEGG_TERPENOID_BACKBONE_BIOSYNTHESIS                      | -1.64 | 1.63 | 0 | 0 | 0 | Repressed |
| 1001 | GO_NEGATIVE_REGULATION_OF_MEGAKARYOCYTE_DIFFERENTIATION   | -1.64 | 1.62 | 0 | 0 | 0 | Repressed |
| 1002 | REACTOME_IRF3_MEDIATED_INDUCTION_OF_TYPE_I_IFN            | -1.64 | 1.60 | 0 | 0 | 0 | Repressed |
| 1003 | KANG_FLUOROURACIL_RESISTANCE_DN                           | -1.64 | 1.59 | 0 | 0 | 0 | Repressed |
| 1004 | GO_POSITIVE_REGULATION_OF_PODOSOME_ASSEMBLY               | -1.64 | 1.58 | 0 | 0 | 0 | Repressed |
| 1005 | REACTOME_FGFR2_MUTANT_RECEPTOR_ACTIVATION                 | -1.64 | 1.56 | 0 | 0 | 0 | Repressed |
| 1006 | GO_HISTONE_ARGININE_N_METHYLTRANSFERASE_ACTIVITY          | -1.64 | 1.52 | 0 | 0 | 0 | Repressed |
| 1007 | BIOCARTA_ETC_PATHWAY                                      | -1.64 | 1.47 | 0 | 0 | 0 | Repressed |
| 1008 | DAZARD_RESPONSE_TO_UV_NHEK_UP                             | -1.63 | 4.00 | 0 | 0 | 0 | Repressed |
| 1009 | GO_MICROTUBULE_CYTOSKELETON_ORGANIZATION_INVOLVED_IN_MITC | -1.63 | 4.00 | 0 | 0 | 0 | Repressed |
| 1010 | GO_POSITIVE_REGULATION_OF_MULTICELLULAR_ORGANISM_PROCESS  | -1.63 | 4.00 | 0 | 0 | 0 | Repressed |
| 1011 | REACTOME_CYTOKINE_SIGNALING_IN_IMMUNE_SYSTEM              | -1.63 | 4.00 | 0 | 0 | 0 | Repressed |
| 1012 | RICKMAN_METASTASIS_DN                                     | -1.63 | 4.00 | 0 | 0 | 0 | Repressed |
| 1013 | ZHANG_BREAST_CANCER_PROGENITORS_UP                        | -1.63 | 4.00 | 0 | 0 | 0 | Repressed |
| 1014 | KIM_MYCN_AMPLIFICATION_TARGETS_UP                         | -1.63 | 2.58 | 0 | 0 | 0 | Repressed |
| 1015 | JAZAERI_BREAST_CANCER_BRCA1_VS_BRCA2_UP                   | -1.63 | 2.56 | 0 | 0 | 0 | Repressed |
| 1016 | REACTOME_SUMOYLATION_OF_UBIQUITINYLATION_PROTEINS         | -1.63 | 2.56 | 0 | 0 | 0 | Repressed |
| 1017 | REACTOME_ACTIVATION_OF_HOX_GENES_DURING_DIFFERENTIATION   | -1.63 | 2.54 | 0 | 0 | 0 | Repressed |
| 1018 | GO_SM_LIKE_PROTEIN_FAMILY_COMPLEX                         | -1.63 | 2.52 | 0 | 0 | 0 | Repressed |
| 1019 | REACTOME_COPI_DEPENDENT_GOLGI_TO_ER_RETROGRADE_TRAFFIC    | -1.63 | 2.48 | 0 | 0 | 0 | Repressed |
| 1020 | SU_TESTIS                                                 | -1.63 | 2.26 | 0 | 0 | 0 | Repressed |
| 1021 | WAESCH_ANAPHASE_PROMOTING_COMPLEX                         | -1.63 | 2.15 | 0 | 0 | 0 | Repressed |
| 1022 | GO_CARDIAC_MUSCLE_CONTRACTION                             | -1.63 | 2.10 | 0 | 0 | 0 | Repressed |
| 1023 | TSENG_IRS1_TARGETS_UP                                     | -1.63 | 2.08 | 0 | 0 | 0 | Repressed |
| 1024 | GO_CELLULAR_RESPONSE_TO_UV_B                              | -1.63 | 1.91 | 0 | 0 | 0 | Repressed |
| 1025 | GO_BOX_H_ACA_TELOMERASE_RNP_COMPLEX                       | -1.63 | 1.90 | 0 | 0 | 0 | Repressed |
| 1026 | GO_REGULATION_OF_CALCIIUM_ION_TRANSMEMBRANE_TRANSPORTER   | -1.63 | 1.88 | 0 | 0 | 0 | Repressed |
| 1027 | GO_SPINDLE_LOCALIZATION                                   | -1.63 | 1.88 | 0 | 0 | 0 | Repressed |
| 1028 | LI_CISPLATIN_RESISTANCE_DN                                | -1.63 | 1.88 | 0 | 0 | 0 | Repressed |
| 1029 | GO_MODULATION_BY_HOST_OF_VIRAL_PROCESS                    | -1.63 | 1.86 | 0 | 0 | 0 | Repressed |
| 1030 | HERNANDEZ_ABERRANT_MITOSIS_BY_DOCETACEL_4NM_DN            | -1.63 | 1.82 | 0 | 0 | 0 | Repressed |
| 1031 | GO_TOLL_LIKE_RECEPTOR_9_SIGNALING_PATHWAY                 | -1.63 | 1.80 | 0 | 0 | 0 | Repressed |
| 1032 | GROSS_EIK3_TARGETS_UP                                     | -1.63 | 1.80 | 0 | 0 | 0 | Repressed |
| 1033 | GO_HYDROGEN_PEROXIDE_CATABOLIC_PROCESS                    | -1.63 | 1.77 | 0 | 0 | 0 | Repressed |
| 1034 | REACTOME_G_BETA_GAMMA_SIGNALING_THROUGH_CDC42             | -1.63 | 1.75 | 0 | 0 | 0 | Repressed |
| 1035 | GO_DEAMINASE_ACTIVITY                                     | -1.63 | 1.73 | 0 | 0 | 0 | Repressed |
| 1036 | BIOCARTA_CTL_PATHWAY                                      | -1.63 | 1.72 | 0 | 0 | 0 | Repressed |
| 1037 | GO_REGULATION_OF_CARTILAGE_DEVELOPMENT                    | -1.63 | 1.72 | 0 | 0 | 0 | Repressed |
| 1038 | BIOCARTA_MCALPAIN_PATHWAY                                 | -1.63 | 1.70 | 0 | 0 | 0 | Repressed |
| 1039 | GO_CELLULAR_RESPONSE_TO_CORTICOSTEROID_STIMULUS           | -1.63 | 1.69 | 0 | 0 | 0 | Repressed |
| 1040 | GO_SPLICEOSOMAL_TRISNRNP_COMPLEX                          | -1.63 | 1.69 | 0 | 0 | 0 | Repressed |
| 1041 | MASRI_RESISTANCE_TO_TAMOXIFEN_AND_AROMATASE_INHIBITORS_UP | -1.63 | 1.60 | 0 | 0 | 0 | Repressed |
| 1042 | AMIT_DELAYED_EARLY_GENES                                  | -1.63 | 1.59 | 0 | 0 | 0 | Repressed |
| 1043 | MURAKAMI_UV_RESPONSE_GHR_DN                               | -1.63 | 1.42 | 0 | 0 | 0 | Repressed |
| 1044 | GO_NEGATIVE_REGULATION_OF_WNT_SIGNALING_PATHWAY           | -1.62 | 4.00 | 0 | 0 | 0 | Repressed |
| 1045 | GO_POSTTRANSCRIPTIONAL_REGULATION_OF_GENE_EXPRESSION      | -1.62 | 4.00 | 0 | 0 | 0 | Repressed |
| 1046 | GO_REGULATION_OF_CELL_CYCLE_G2_M_PHASE_TRANSITION         | -1.62 | 4.00 | 0 | 0 | 0 | Repressed |
| 1047 | GO_REGULATION_OF_TRANSPORTER_ACTIVITY                     | -1.62 | 4.00 | 0 | 0 | 0 | Repressed |
| 1048 | GO_RIBOSE_PHOSPHATE_BIOSYNTHETIC_PROCESS                  | -1.62 | 4.00 | 0 | 0 | 0 | Repressed |
| 1049 | GO_RNA_DEPENDENT_DNA_BIOSYNTHETIC_PROCESS                 | -1.62 | 4.00 | 0 | 0 | 0 | Repressed |
| 1050 | GO_TRANSFERASE_ACTIVITY_TRANSFERRING_ONE_CARBON_GROUPS    | -1.62 | 4.00 | 0 | 0 | 0 | Repressed |
| 1051 | MARTORIATI_MDM4_TARGETS_FETAL_LIVER_UP                    | -1.62 | 4.00 | 0 | 0 | 0 | Repressed |
| 1052 | SENESE_HDAC1_TARGETS_UP                                   | -1.62 | 4.00 | 0 | 0 | 0 | Repressed |
| 1053 | SMD_BREAST_CANCER_BASAL_UP                                | -1.62 | 4.00 | 0 | 0 | 0 | Repressed |
| 1054 | WAMUNYOKOLI_OVARIAN_CANCER_LMP_UP                         | -1.62 | 4.00 | 0 | 0 | 0 | Repressed |
| 1055 | GO_CARDIOCYTE_DIFFERENTIATION                             | -1.62 | 2.55 | 0 | 0 | 0 | Repressed |
| 1056 | GO_CHANNEL_REGULATOR_ACTIVITY                             | -1.62 | 2.53 | 0 | 0 | 0 | Repressed |
| 1057 | GO_CLUSTER_OF_ACTIN_BASED_CELL_PROJECTIONS                | -1.62 | 2.52 | 0 | 0 | 0 | Repressed |
| 1058 | FLECHNER_BIOPSY_KIDNEY_TRANSPLANT_REJECTED_VS_OK_UP       | -1.62 | 2.26 | 0 | 0 | 0 | Repressed |
| 1059 | GO_REGULATION_OF_TELOMERE_MAINTENANCE_VIA_TELOMERE_LEN    | -1.62 | 2.24 | 0 | 0 | 0 | Repressed |
| 1060 | GO_LYASE_ACTIVITY                                         | -1.62 | 2.22 | 0 | 0 | 0 | Repressed |
| 1061 | BROWN_MYELOID_CELL_DEVELOPMENT_DN                         | -1.62 | 2.21 | 0 | 0 | 0 | Repressed |
| 1062 | KEGG_CARDIAC_MUSCLE_CONTRACTION                           | -1.62 | 1.99 | 0 | 0 | 0 | Repressed |
| 1063 | MARCHINI TRABECTEDIN_RESISTANCE_DN                        | -1.62 | 1.98 | 0 | 0 | 0 | Repressed |
| 1064 | GO_PROTEIN_TRANSPORTER_ACTIVITY                           | -1.62 | 1.96 | 0 | 0 | 0 | Repressed |
| 1065 | GO_SUBSTANTIA_NIGRA_DEVELOPMENT                           | -1.62 | 1.92 | 0 | 0 | 0 | Repressed |
| 1066 | GO_SECONDARY_METABOLIC_PROCESS                            | -1.62 | 1.83 | 0 | 0 | 0 | Repressed |
| 1067 | LEE_LIVER_CANCER_E2F1_UP                                  | -1.62 | 1.82 | 0 | 0 | 0 | Repressed |
| 1068 | GO_REGULATION_OF_DNA_METHYLATION                          | -1.62 | 1.78 | 0 | 0 | 0 | Repressed |
| 1069 | BIOCARTA_BCR_PATHWAY                                      | -1.62 | 1.76 | 0 | 0 | 0 | Repressed |
| 1070 | KEGG_ARGININE_AND_PROLINE_METABOLISM                      | -1.62 | 1.74 | 0 | 0 | 0 | Repressed |
| 1071 | BOHN_PRIMARY_IMMUNODEFICIENCY_SYNDROM_DN                  | -1.62 | 1.67 | 0 | 0 | 0 | Repressed |
| 1072 | GO_REGULATION_OF_OXIDATIVE_PHOSPHORYLATION                | -1.62 | 1.67 | 0 | 0 | 0 | Repressed |
| 1073 | GO_INTRACELLULAR_LIPID_TRANSPORT                          | -1.62 | 1.66 | 0 | 0 | 0 | Repressed |
| 1074 | GO_NUCLEOCYTOPLASMIC_CARRIER_ACTIVITY                     | -1.62 | 1.62 | 0 | 0 | 0 | Repressed |
| 1075 | PARK_HSC_VS_MULTIPOTENT_PROGENITORS_DN                    | -1.62 | 1.55 | 0 | 0 | 0 | Repressed |
| 1076 | REACTOME_GABA_B_RECEPTOR_ACTIVATION                       | -1.62 | 1.55 | 0 | 0 | 0 | Repressed |
| 1077 | AMIT_SERUM_RESPONSE_20_MCF10A                             | -1.62 | 1.53 | 0 | 0 | 0 | Repressed |
| 1078 | GO_SUPEROXIDE_ANION_GENERATION                            | -1.62 | 1.53 | 0 | 0 | 0 | Repressed |

|      |                                                             |       |      |   |   |   |           |
|------|-------------------------------------------------------------|-------|------|---|---|---|-----------|
| 1079 | REACTOME ADRENALINE NORADRENALINE INHIBITS INSULIN SECRETIO | -1.62 | 1.50 | 0 | 0 | 0 | Repressed |
| 1080 | GO_PYRUVATE_METABOLIC_PROCESS                               | -1.62 | 1.49 | 0 | 0 | 0 | Repressed |
| 1081 | BIOCARTA_CCR5_PATHWAY                                       | -1.62 | 1.47 | 0 | 0 | 0 | Repressed |
| 1082 | GARGALOVIC_RESPONSE_TO_OXIDIZED_PHOSPHOLIPIDS_BROWN_UP      | -1.62 | 1.45 | 0 | 0 | 0 | Repressed |
| 1083 | GO_MONOCARBOXYLIC_ACID_METABOLIC_PROCESS                    | -1.61 | 4.00 | 0 | 0 | 0 | Repressed |
| 1084 | GO_POSITIVE_REGULATION_OF_ION_TRANSMEMBRANE_TRANSPORT       | -1.61 | 4.00 | 0 | 0 | 0 | Repressed |
| 1085 | GO_REGULATION_OF_ANIMAL_ORGAN_MORPHOGENESIS                 | -1.61 | 4.00 | 0 | 0 | 0 | Repressed |
| 1086 | GO_REGULATION_OF_CHROMOSOME_SEGREGATION                     | -1.61 | 4.00 | 0 | 0 | 0 | Repressed |
| 1087 | HOELZEL_NF1_TARGETS_UP                                      | -1.61 | 4.00 | 0 | 0 | 0 | Repressed |
| 1088 | MATTIOLI_MGUS_VS_PCL                                        | -1.61 | 4.00 | 0 | 0 | 0 | Repressed |
| 1089 | SARRIO_EPITHELIAL_MESENCHYMAL_TRANSITION_UP                 | -1.61 | 4.00 | 0 | 0 | 0 | Repressed |
| 1090 | GO_LEUKOCYTE_CHEMOTAXIS                                     | -1.61 | 2.55 | 0 | 0 | 0 | Repressed |
| 1091 | GO_REGULATION_OF_LEUKOCYTE_APOPTOTIC_PROCESS                | -1.61 | 2.55 | 0 | 0 | 0 | Repressed |
| 1092 | GO_RESPONSE_TO_INTERLEUKIN_1                                | -1.61 | 2.50 | 0 | 0 | 0 | Repressed |
| 1093 | GO_PURINE_CONTAINING_COMPOUND_BIOSYNTHETIC_PROCESS          | -1.61 | 2.49 | 0 | 0 | 0 | Repressed |
| 1094 | GO_REGULATION_OF_MUSCLE_SYSTEM_PROCESS                      | -1.61 | 2.49 | 0 | 0 | 0 | Repressed |
| 1095 | SNF5_DN.V1_UP                                               | -1.61 | 2.49 | 0 | 0 | 0 | Repressed |
| 1096 | GO_ACTOMYOSIN                                               | -1.61 | 2.25 | 0 | 0 | 0 | Repressed |
| 1097 | NAGASHIMA_NRG1_SIGNALING_UP                                 | -1.61 | 2.18 | 0 | 0 | 0 | Repressed |
| 1098 | RICKMAN_TUMOR_DIFFERENTIATED_WELL_VS_MODERATELY_DN          | -1.61 | 2.12 | 0 | 0 | 0 | Repressed |
| 1099 | LEF1_UP.V1_UP                                               | -1.61 | 2.08 | 0 | 0 | 0 | Repressed |
| 1100 | YAO_TEMPORAL_RESPONSE_TO_PROGESTERONE_CLUSTER_7             | -1.61 | 1.97 | 0 | 0 | 0 | Repressed |
| 1101 | GO_REGULATION_OF_SISTER_CHROMATID_SEGREGATION               | -1.61 | 1.95 | 0 | 0 | 0 | Repressed |
| 1102 | GO_BOX_H_ACA_SNORNP_COMPLEX                                 | -1.61 | 1.89 | 0 | 0 | 0 | Repressed |
| 1103 | GO_NAD_METABOLIC_PROCESS                                    | -1.61 | 1.85 | 0 | 0 | 0 | Repressed |
| 1104 | GO_ESTABLISHMENT_OF_EPITHELIAL_CELL_POLARITY                | -1.61 | 1.83 | 0 | 0 | 0 | Repressed |
| 1105 | GO_MRNA_PSEUDOURIDINE_SYNTHESIS                             | -1.61 | 1.81 | 0 | 0 | 0 | Repressed |
| 1106 | GARGALOVIC_RESPONSE_TO_OXIDIZED_PHOSPHOLIPIDS_TURQUOISE_C   | -1.61 | 1.80 | 0 | 0 | 0 | Repressed |
| 1107 | TERAMOTO_OPN_TARGETS_CLUSTER_1                              | -1.61 | 1.80 | 0 | 0 | 0 | Repressed |
| 1108 | GARGALOVIC_RESPONSE_TO_OXIDIZED_PHOSPHOLIPIDS_GREEN_UP      | -1.61 | 1.77 | 0 | 0 | 0 | Repressed |
| 1109 | GO_CRD_MEDIATED_MRNA_STABILITY_COMPLEX                      | -1.61 | 1.76 | 0 | 0 | 0 | Repressed |
| 1110 | REACTOME_DAG_AND_IP3_SIGNALING                              | -1.61 | 1.76 | 0 | 0 | 0 | Repressed |
| 1111 | GO_RNA_POLYMERASE_ACTIVITY                                  | -1.61 | 1.75 | 0 | 0 | 0 | Repressed |
| 1112 | PID_CXCR3_PATHWAY                                           | -1.61 | 1.75 | 0 | 0 | 0 | Repressed |
| 1113 | KEGG_RENIN_ANGIOTENSIN_SYSTEM                               | -1.61 | 1.71 | 0 | 0 | 0 | Repressed |
| 1114 | LIANG_HEMATOPOIESIS_STEM_CELL_NUMBER_SMALL_VS_HUGE_UP       | -1.61 | 1.69 | 0 | 0 | 0 | Repressed |
| 1115 | GO_RRNA_MODIFICATION                                        | -1.61 | 1.66 | 0 | 0 | 0 | Repressed |
| 1116 | GO_UBIQUITIN_PROTEIN_TRANSFERASE_ACTIVATOR_ACTIVITY         | -1.61 | 1.65 | 0 | 0 | 0 | Repressed |
| 1117 | REACTOME_CYCLIN_A_B1_B2_ASSOCIATED_EVENTS_DURING_G2_M_TR    | -1.61 | 1.65 | 0 | 0 | 0 | Repressed |
| 1118 | GO_REGULATION_OF_MAST_CELL_CHEMOTAXIS                       | -1.61 | 1.63 | 0 | 0 | 0 | Repressed |
| 1119 | REACTOME_FGFR2_ALTERNATIVE_SPLICING                         | -1.61 | 1.61 | 0 | 0 | 0 | Repressed |
| 1120 | GO_RNA_POLYMERASE_III_ACTIVITY                              | -1.61 | 1.60 | 0 | 0 | 0 | Repressed |
| 1121 | GO_DOUBLE_STRANDED_METHYLATED_DNA_BINDING                   | -1.61 | 1.59 | 0 | 0 | 0 | Repressed |
| 1122 | GO_PROTEIN_DISULFIDE_ISOMERASE_ACTIVITY                     | -1.61 | 1.54 | 0 | 0 | 0 | Repressed |
| 1123 | BILANGES_SERUM_SENSITIVE_VIA_TSC1                           | -1.61 | 1.53 | 0 | 0 | 0 | Repressed |
| 1124 | GO_RNA_CONTAINING_RIBONUCLEOPROTEIN_COMPLEX_EXPORT_FRO      | -1.61 | 1.52 | 0 | 0 | 0 | Repressed |
| 1125 | BIOCARTA_RARRXR_PATHWAY                                     | -1.61 | 1.51 | 0 | 0 | 0 | Repressed |
| 1126 | GO_POSTTRANSLATIONAL_PROTEIN_TARGETING_TO_ENDOPLASMIC_RI    | -1.61 | 1.45 | 0 | 0 | 0 | Repressed |
| 1127 | ALCALAY_AML_BY_NPM1_LOCALIZATION_DN                         | -1.60 | 4.00 | 0 | 0 | 0 | Repressed |
| 1128 | BENPORATH_MYC_MAX_TARGETS                                   | -1.60 | 4.00 | 0 | 0 | 0 | Repressed |
| 1129 | ERBB2_UP.V1_DN                                              | -1.60 | 4.00 | 0 | 0 | 0 | Repressed |
| 1130 | GO_MITOTIC_SISTER_CHROMATID_SEGREGATION                     | -1.60 | 4.00 | 0 | 0 | 0 | Repressed |
| 1131 | GO_PROTEIN_TETRAMERIZATION                                  | -1.60 | 4.00 | 0 | 0 | 0 | Repressed |
| 1132 | IGLESIAS_E2F_TARGETS_UP                                     | -1.60 | 4.00 | 0 | 0 | 0 | Repressed |
| 1133 | KENNY_CTNNB1_TARGETS_UP                                     | -1.60 | 4.00 | 0 | 0 | 0 | Repressed |
| 1134 | MTOR_UP.V1_UP                                               | -1.60 | 4.00 | 0 | 0 | 0 | Repressed |
| 1135 | REACTOME_TCF_DEPENDENT_SIGNALING_IN_RESPONSE_TO_WNT         | -1.60 | 4.00 | 0 | 0 | 0 | Repressed |
| 1136 | ZHANG_TLX_TARGETS_60HR_DN                                   | -1.60 | 4.00 | 0 | 0 | 0 | Repressed |
| 1137 | GO_POSITIVE_REGULATION_OF_LIPID_BIOSYNTHETIC_PROCESS        | -1.60 | 2.27 | 0 | 0 | 0 | Repressed |
| 1138 | GO_MYELIN_SHEATH_ADAXONAL_REGION                            | -1.60 | 2.17 | 0 | 0 | 0 | Repressed |
| 1139 | GO_CELLULAR_RESPONSE_TO_AMINO_ACID_STIMULUS                 | -1.60 | 1.91 | 0 | 0 | 0 | Repressed |
| 1140 | GO_NEURAL_NUCLEUS_DEVELOPMENT                               | -1.60 | 1.87 | 0 | 0 | 0 | Repressed |
| 1141 | GO_NUCLEOSOMAL_DNA_BINDING                                  | -1.60 | 1.80 | 0 | 0 | 0 | Repressed |
| 1142 | REACTOME ANTIGEN PRESENTATION: FOLDING ASSEMBLY AND PEPT    | -1.60 | 1.78 | 0 | 0 | 0 | Repressed |
| 1143 | GO_NEGATIVE_REGULATION_OF_LEUKOCYTE_APOPTOTIC_PROCESS       | -1.60 | 1.76 | 0 | 0 | 0 | Repressed |
| 1144 | GO_SCAVENGER_RECEPTOR_ACTIVITY                              | -1.60 | 1.72 | 0 | 0 | 0 | Repressed |
| 1145 | REACTOME_SUMOYLATION_OF_SUMOYLATION_PROTEINS                | -1.60 | 1.71 | 0 | 0 | 0 | Repressed |
| 1146 | GO_CHAPERONIN_CONTAINING_T_COMPLEX                          | -1.60 | 1.69 | 0 | 0 | 0 | Repressed |
| 1147 | BIOCARTA_TCAPOPTOSIS_PATHWAY                                | -1.60 | 1.61 | 0 | 0 | 0 | Repressed |
| 1148 | GO_TRNA_3_END_PROCESSING                                    | -1.60 | 1.60 | 0 | 0 | 0 | Repressed |
| 1149 | GRAHAM_CML QUIESCENT_VS_NORMAL QUIESCENT_DN                 | -1.60 | 1.60 | 0 | 0 | 0 | Repressed |
| 1150 | GO_CATALYTIC_ACTIVITY_ACTING_ON_A_RRNA                      | -1.60 | 1.59 | 0 | 0 | 0 | Repressed |
| 1151 | GO_NUCLEAR_RECEPTOR_ACTIVITY                                | -1.60 | 1.57 | 0 | 0 | 0 | Repressed |
| 1152 | GO_POSITIVE_REGULATION_OF_SODIUM_ION_TRANSMEMBRANE_TRAN     | -1.60 | 1.57 | 0 | 0 | 0 | Repressed |
| 1153 | SUZUKI_RESPONSE_TO_TSA                                      | -1.60 | 1.56 | 0 | 0 | 0 | Repressed |
| 1154 | GO POSITIVE REGULATION OF SODIUM ION TRANSMEMBRANE TRAN     | -1.60 | 1.55 | 0 | 0 | 0 | Repressed |
| 1155 | GO_REGULATION_OF_TRANSLATIONAL_TERMINATION                  | -1.60 | 1.55 | 0 | 0 | 0 | Repressed |
| 1156 | REACTOME_TIE2_SIGNALING                                     | -1.60 | 1.55 | 0 | 0 | 0 | Repressed |
| 1157 | GO_MITOCHONDRIAL_RNA_MODIFICATION                           | -1.60 | 1.54 | 0 | 0 | 0 | Repressed |
| 1158 | MANN_RESPONSE_TO_AMIFOSTINE_DN                              | -1.60 | 1.54 | 0 | 0 | 0 | Repressed |
| 1159 | REACTOME_ETHANOL_OXIDATION                                  | -1.60 | 1.54 | 0 | 0 | 0 | Repressed |
| 1160 | GO_MITOCHONDRIAL_TRANSCRIPTION                              | -1.60 | 1.50 | 0 | 0 | 0 | Repressed |
| 1161 | TURJANSKI_MAPK8_AND_MAPK9_TARGETS                           | -1.60 | 1.49 | 0 | 0 | 0 | Repressed |
| 1162 | GO_METHYL_CPG_BINDING                                       | -1.60 | 1.47 | 0 | 0 | 0 | Repressed |
| 1163 | GO_CELL_ADHESION_MOLECULE_BINDING                           | -1.59 | 4.00 | 0 | 0 | 0 | Repressed |
| 1164 | GO_CYTOKINE_MEDIATED_SIGNALING_PATHWAY                      | -1.59 | 4.00 | 0 | 0 | 0 | Repressed |
| 1165 | GO_LIGASE_ACTIVITY                                          | -1.59 | 4.00 | 0 | 0 | 0 | Repressed |
| 1166 | GO_RESPONSE_TO_OXYGEN_LEVELS                                | -1.59 | 4.00 | 0 | 0 | 0 | Repressed |
| 1167 | GO_RNA_SPLICING_VIA_TRANSESTERIFICATION_REACTIONS           | -1.59 | 4.00 | 0 | 0 | 0 | Repressed |
| 1168 | HALLMARK_HYPOXIA                                            | -1.59 | 4.00 | 0 | 0 | 0 | Repressed |
| 1169 | GO_OTHER_ORGANISM                                           | -1.59 | 2.53 | 0 | 0 | 0 | Repressed |
| 1170 | GO_PROTEIN_SERINE_THREONINE_PHOSPHATASE_COMPLEX             | -1.59 | 2.30 | 0 | 0 | 0 | Repressed |
| 1171 | GO_FATTY_ACID_BIOSYNTHETIC_PROCESS                          | -1.59 | 2.23 | 0 | 0 | 0 | Repressed |
| 1172 | REACTOME_COPI_MEDIATED_ANTEROGRADE_TRANSPORT                | -1.59 | 2.23 | 0 | 0 | 0 | Repressed |
| 1173 | GO_FATTY_ACID_BETA_OXIDATION                                | -1.59 | 2.09 | 0 | 0 | 0 | Repressed |
| 1174 | LEONARD_HYPOXIA                                             | -1.59 | 2.08 | 0 | 0 | 0 | Repressed |
| 1175 | GO_PROTEIN_TARGETING_TO_MITOCHONDRION                       | -1.59 | 2.05 | 0 | 0 | 0 | Repressed |
| 1176 | MOHANKUMAR_TLX1_TARGETS_DN                                  | -1.59 | 1.98 | 0 | 0 | 0 | Repressed |
| 1177 | BIOCARTA_CELL2CELL_PATHWAY                                  | -1.59 | 1.83 | 0 | 0 | 0 | Repressed |
| 1178 | GO_METAPHASE_ANAPHASE_TRANSITION_OF_CELL_CYCLE              | -1.59 | 1.79 | 0 | 0 | 0 | Repressed |
| 1179 | SMITH_LIVER_CANCER                                          | -1.59 | 1.75 | 0 | 0 | 0 | Repressed |
| 1180 | REACTOME_MAP2K_AND_MAPK_ACTIVATION                          | -1.59 | 1.74 | 0 | 0 | 0 | Repressed |
| 1181 | GO_ENUCLEATE_ERYTHROCYTE_DIFFERENTIATION                    | -1.59 | 1.73 | 0 | 0 | 0 | Repressed |
| 1182 | GO_REGULATION_OF_TRIGLYCERIDE_BIOSYNTHETIC_PROCESS          | -1.59 | 1.70 | 0 | 0 | 0 | Repressed |
| 1183 | GO_RNA_POLYMERASE_II_CTD_HEPTAPEPTIDE_REPEAT_KINASE_ACTIVI  | -1.59 | 1.70 | 0 | 0 | 0 | Repressed |
| 1184 | GO_REGULATION_OF_TELOMERASE_ACTIVITY                        | -1.59 | 1.69 | 0 | 0 | 0 | Repressed |
| 1185 | BIOCARTA_CARM1_PATHWAY                                      | -1.59 | 1.67 | 0 | 0 | 0 | Repressed |
| 1186 | GO_TRNA_SPLICING_LIGASE_COMPLEX                             | -1.59 | 1.66 | 0 | 0 | 0 | Repressed |
| 1187 | FARMER_BREAST_CANCER_CLUSTER_5                              | -1.59 | 1.63 | 0 | 0 | 0 | Repressed |

|      |                                                            |       |      |   |   |   |           |
|------|------------------------------------------------------------|-------|------|---|---|---|-----------|
| 1188 | GO_NUCLEOBASE_BIOSYNTHETIC_PROCESS                         | -1.59 | 1.63 | 0 | 0 | 0 | Repressed |
| 1189 | GO_POSITIVE_REGULATION_OF_TRANSCRIPTION_OF_NUCLEOLAR_LARI  | -1.59 | 1.60 | 0 | 0 | 0 | Repressed |
| 1190 | GO_REGULATION_OF_FATTY_ACID_BIOSYNTHETIC_PROCESS           | -1.59 | 1.60 | 0 | 0 | 0 | Repressed |
| 1191 | MCBRYAN_TERMINAL_END_BUD_DN                                | -1.59 | 1.56 | 0 | 0 | 0 | Repressed |
| 1192 | VALK_AML_CLUSTER_16                                        | -1.59 | 1.53 | 0 | 0 | 0 | Repressed |
| 1193 | GO_PHOSPHATIDYLINOSITOL_3_KINASE_BINDING                   | -1.59 | 1.51 | 0 | 0 | 0 | Repressed |
| 1194 | MACLACHLAN_BRCA1_TARGETS_UP                                | -1.59 | 1.49 | 0 | 0 | 0 | Repressed |
| 1195 | VILIMAS_NOTCH1_TARGETS_DN                                  | -1.59 | 1.49 | 0 | 0 | 0 | Repressed |
| 1196 | GO_MICOS_COMPLEX                                           | -1.59 | 1.48 | 0 | 0 | 0 | Repressed |
| 1197 | GO_ESTABLISHMENT_OF_MITOTIC_SPINDLE_LOCALIZATION           | -1.59 | 1.47 | 0 | 0 | 0 | Repressed |
| 1198 | GO_GEMINI_OF_COILED_BODIES                                 | -1.59 | 1.47 | 0 | 0 | 0 | Repressed |
| 1199 | REACTOME_REGULATION_OF_CYTOSKELETAL_REMODELING_AND_CELI    | -1.59 | 1.47 | 0 | 0 | 0 | Repressed |
| 1200 | GO_RESPONSE_TO_FUNGUS                                      | -1.59 | 1.46 | 0 | 0 | 0 | Repressed |
| 1201 | GO_TAT_PROTEIN_BINDING                                     | -1.59 | 1.44 | 0 | 0 | 0 | Repressed |
| 1202 | GO_REGULATION_OF_TRANSLATIONAL_ELONGATION                  | -1.59 | 1.43 | 0 | 0 | 0 | Repressed |
| 1203 | GO_TRNA_THREONYLCARBAMOYLADENOSINE_METABOLIC_PROCESS       | -1.59 | 1.43 | 1 | 0 | 0 | Repressed |
| 1204 | GO_PHOSPHOFRUCTOKINASE_ACTIVITY                            | -1.59 | 1.41 | 0 | 0 | 0 | Repressed |
| 1205 | GO_SODIUM_CHANNEL_REGULATOR_ACTIVITY                       | -1.59 | 1.39 | 0 | 0 | 0 | Repressed |
| 1206 | CHUANG_OXIDATIVE_STRESS_RESPONSE_DN                        | -1.59 | 1.34 | 0 | 0 | 0 | Repressed |
| 1207 | GO_N6_METHYLADENOSINE_CONTAINING_RNA_BINDING               | -1.59 | 1.34 | 0 | 0 | 0 | Repressed |
| 1208 | GO_MULTIMERIC_RIBONUCLEASE_P_COMPLEX                       | -1.59 | 1.30 | 0 | 0 | 0 | Repressed |
| 1209 | GO_MONOCYTE_CHEMOTAXIS                                     | -1.59 | 1.22 | 0 | 0 | 0 | Repressed |
| 1210 | DITTMER_PTHLH_TARGETS_UP                                   | -1.58 | 4.00 | 0 | 0 | 0 | Repressed |
| 1211 | FISCHER_DREAM_TARGETS                                      | -1.58 | 4.00 | 0 | 0 | 0 | Repressed |
| 1212 | GO_REGULATION_OF_SYMBIOSIS_ENCOMPASSING_MUTUALISM_THROU    | -1.58 | 4.00 | 0 | 0 | 0 | Repressed |
| 1213 | GO_RESPONSE_TO_HORMONE                                     | -1.58 | 4.00 | 0 | 0 | 0 | Repressed |
| 1214 | GO_T_CELL_RECEPTOR_SIGNALING_PATHWAY                       | -1.58 | 4.00 | 0 | 0 | 0 | Repressed |
| 1215 | QI_HYPOXIA                                                 | -1.58 | 4.00 | 0 | 0 | 0 | Repressed |
| 1216 | REACTOME_CELL_CYCLE                                        | -1.58 | 4.00 | 0 | 0 | 0 | Repressed |
| 1217 | REACTOME_RHO_GTPASE_EFFECTORS                              | -1.58 | 4.00 | 0 | 0 | 0 | Repressed |
| 1218 | SMIRNOV_RESPONSE_TO_IR_6HR_DN                              | -1.58 | 4.00 | 0 | 0 | 0 | Repressed |
| 1219 | GO_OXIDOREDUCTASE_ACTIVITY_ACTING_ON_CH_OH_GROUP_OF_DON    | -1.58 | 2.51 | 0 | 0 | 0 | Repressed |
| 1220 | GO_POSITIVE_REGULATION_OF_RNA_METABOLIC_PROCESS            | -1.58 | 2.22 | 0 | 0 | 0 | Repressed |
| 1221 | GO_COFACTOR_BIOSYNTHETIC_PROCESS                           | -1.58 | 2.17 | 0 | 0 | 0 | Repressed |
| 1222 | GO_MONOCARBOXYLIC_ACID_TRANSPORT                           | -1.58 | 2.05 | 0 | 0 | 0 | Repressed |
| 1223 | GO_POSITIVE_REGULATION_OF_VIRAL_LIFE_CYCLE                 | -1.58 | 2.01 | 0 | 0 | 0 | Repressed |
| 1224 | LU_IL4_SIGNALING                                           | -1.58 | 1.96 | 0 | 0 | 0 | Repressed |
| 1225 | GAURNIER_PSMD4_TARGETS                                     | -1.58 | 1.84 | 0 | 0 | 0 | Repressed |
| 1226 | HOFFMANN_IMMATURE_TO_MATURE_B_LYMPHOCYTE_DN                | -1.58 | 1.84 | 0 | 0 | 0 | Repressed |
| 1227 | GO_NUCLEOID                                                | -1.58 | 1.78 | 0 | 0 | 0 | Repressed |
| 1228 | GO_EXTRACELLULAR_MATRIX_BINDING                            | -1.58 | 1.72 | 0 | 0 | 0 | Repressed |
| 1229 | HESS_TARGETS_OF_HOXA9_AND_MEIS1_DN                         | -1.58 | 1.72 | 0 | 0 | 0 | Repressed |
| 1230 | GO_OXALOACETATE_METABOLIC_PROCESS                          | -1.58 | 1.71 | 0 | 0 | 0 | Repressed |
| 1231 | GO_HORMONE_ACTIVITY                                        | -1.58 | 1.64 | 0 | 0 | 0 | Repressed |
| 1232 | GO_NEGATIVE_REGULATION_OF_LIPOPROTEIN_PARTICLE_CLEARANCE   | -1.58 | 1.63 | 0 | 0 | 0 | Repressed |
| 1233 | GO_DEFENSE_RESPONSE_TO_GRAM_NEGATIVE_BACTERIUM             | -1.58 | 1.61 | 0 | 0 | 0 | Repressed |
| 1234 | GO_STAT_FAMILY_PROTEIN_BINDING                             | -1.58 | 1.61 | 0 | 0 | 0 | Repressed |
| 1235 | KEGG_LIMONENE_AND_PINENE_DEGRADATION                       | -1.58 | 1.61 | 0 | 0 | 0 | Repressed |
| 1236 | GO_VENTRICULAR_CARDIAC_MUSCLE_CELL_DEVELOPMENT             | -1.58 | 1.58 | 0 | 0 | 0 | Repressed |
| 1237 | FARMER_BREAST_CANCER_CLUSTER_4                             | -1.58 | 1.55 | 0 | 0 | 0 | Repressed |
| 1238 | GO_CELL_PROLIFERATION_INVOLVED_IN_HEART_MORPHOGENESIS      | -1.58 | 1.53 | 0 | 0 | 0 | Repressed |
| 1239 | GO_POSITIVE_REGULATION_OF_REACTIVE_OXYGEN_SPECIES_METABO   | -1.58 | 1.53 | 0 | 0 | 0 | Repressed |
| 1240 | GO_RNA_POLYMERASE_II_PREINITIATION_COMPLEX_ASSEMBLY        | -1.58 | 1.53 | 0 | 0 | 0 | Repressed |
| 1241 | SCHUHMACHER_MYC_TARGETS_DN                                 | -1.58 | 1.52 | 0 | 0 | 0 | Repressed |
| 1242 | REACTOME_ANTIGEN_ACTIVATES_B_CELL_RECEPTOR_BCR_LEADING_1   | -1.58 | 1.50 | 0 | 0 | 0 | Repressed |
| 1243 | GO_CYSTEINE_METABOLIC_PROCESS                              | -1.58 | 1.49 | 0 | 0 | 0 | Repressed |
| 1244 | KEGG_GALACTOSE_METABOLISM                                  | -1.58 | 1.48 | 0 | 0 | 0 | Repressed |
| 1245 | GO_RESPIRATORY_CHAIN_COMPLEX_III                           | -1.58 | 1.47 | 0 | 0 | 0 | Repressed |
| 1246 | GO_TISSUE_REGENERATION                                     | -1.58 | 1.47 | 0 | 0 | 0 | Repressed |
| 1247 | GO_ENDOPEPTIDASE_ACTIVATOR_ACTIVITY                        | -1.58 | 1.46 | 0 | 0 | 0 | Repressed |
| 1248 | GO_POSITIVE_REGULATION_OF_FATTY_ACID_BIOSYNTHETIC_PROCESS  | -1.58 | 1.44 | 0 | 0 | 0 | Repressed |
| 1249 | GO_POSITIVE_REGULATION_OF_STEROID_METABOLIC_PROCESS        | -1.58 | 1.42 | 0 | 0 | 0 | Repressed |
| 1250 | GO_ESTABLISHMENT_OR_MAINTENANCE_OF_TRANSMEMBRANE_ELECTI    | -1.58 | 1.41 | 0 | 0 | 0 | Repressed |
| 1251 | HANN_RESISTANCE_TO_BCL2_INHIBITOR_DN                       | -1.58 | 1.39 | 0 | 0 | 0 | Repressed |
| 1252 | GO_PROTEIN_LOCALIZATION_TO_NUCLEAR_ENVELOPE                | -1.58 | 1.37 | 0 | 0 | 0 | Repressed |
| 1253 | GO_CELLULAR_RESPONSE_TO_FLUID_SHEAR_STRESS                 | -1.58 | 1.31 | 0 | 0 | 0 | Repressed |
| 1254 | MONTERO_THYROID_CANCER_POOR_SURVIVAL_UP                    | -1.58 | 1.31 | 0 | 0 | 0 | Repressed |
| 1255 | ACEVEDO_LIVER_TUMOR_VS_NORMAL_ADJACENT_TISSUE_UP           | -1.57 | 4.00 | 0 | 0 | 0 | Repressed |
| 1256 | CHICAS_RB1_TARGETS_CONFLUENT                               | -1.57 | 4.00 | 0 | 0 | 0 | Repressed |
| 1257 | GO_UNFOLDED_PROTEIN_BINDING                                | -1.57 | 4.00 | 0 | 0 | 0 | Repressed |
| 1258 | JOHNSTONE_PARVB_TARGETS_3_DN                               | -1.57 | 4.00 | 0 | 0 | 0 | Repressed |
| 1259 | RB_DN.V1_DN                                                | -1.57 | 4.00 | 0 | 0 | 0 | Repressed |
| 1260 | REACTOME_S_PHASE                                           | -1.57 | 4.00 | 0 | 0 | 0 | Repressed |
| 1261 | GO_VESICLE_BUDDING_FROM_MEMBRANE                           | -1.57 | 2.54 | 0 | 0 | 0 | Repressed |
| 1262 | GO_MULTI_ORGANISM_LOCALIZATION                             | -1.57 | 2.53 | 0 | 0 | 0 | Repressed |
| 1263 | LEE_LIVER_CANCER_SURVIVAL_UP                               | -1.57 | 2.52 | 0 | 0 | 0 | Repressed |
| 1264 | GO_REGULATION_OF_TELOMERE_MAINTENANCE                      | -1.57 | 2.50 | 0 | 0 | 0 | Repressed |
| 1265 | GO_REGULATION_OF_BLOOD_CIRCULATION                         | -1.57 | 2.48 | 0 | 0 | 0 | Repressed |
| 1266 | GO_REGULATION_OF_CELLULAR_RESPONSE_TO_HEAT                 | -1.57 | 2.09 | 0 | 0 | 0 | Repressed |
| 1267 | ALCALAY_AML_BY_NPM1_LOCALIZATION_UP                        | -1.57 | 1.96 | 0 | 0 | 0 | Repressed |
| 1268 | CHR10Q23                                                   | -1.57 | 1.91 | 0 | 0 | 0 | Repressed |
| 1269 | GO_CARDIAC_CONDUCTION                                      | -1.57 | 1.88 | 0 | 0 | 0 | Repressed |
| 1270 | REACTOME_SIGNALING_BY_RAS_MUTANTS                          | -1.57 | 1.80 | 0 | 0 | 0 | Repressed |
| 1271 | SABATES_COLORECTAL_ADENOMA_UP                              | -1.57 | 1.80 | 0 | 0 | 0 | Repressed |
| 1272 | GENTILE_UV_LOW_DOSE_DN                                     | -1.57 | 1.74 | 0 | 0 | 0 | Repressed |
| 1273 | GO_COFACTOR_CATABOLIC_PROCESS                              | -1.57 | 1.74 | 0 | 0 | 0 | Repressed |
| 1274 | GO_CARDIAC_MUSCLE_CELL_DIFFERENTIATION                     | -1.57 | 1.73 | 0 | 0 | 0 | Repressed |
| 1275 | GO_PROTEIN_KINASE_A_BINDING                                | -1.57 | 1.73 | 0 | 0 | 0 | Repressed |
| 1276 | GO_POSITIVE_REGULATION_OF_VOLTAGE_GATED_POTASSIUM_CHANNE   | -1.57 | 1.72 | 0 | 0 | 0 | Repressed |
| 1277 | GO_STRUCTURAL_CONSTITUENT_OF_NUCLEAR_PORE                  | -1.57 | 1.72 | 0 | 0 | 0 | Repressed |
| 1278 | REACTOME_CONDENSATION_OF_PROPHASE_CHROMOSOMES              | -1.57 | 1.71 | 0 | 0 | 0 | Repressed |
| 1279 | KONDO_HYPOXIA                                              | -1.57 | 1.63 | 0 | 0 | 0 | Repressed |
| 1280 | GO_DE_NOVO_PROTEIN_FOLDING                                 | -1.57 | 1.62 | 0 | 0 | 0 | Repressed |
| 1281 | REACTOME_METABOLISM_OF_INGESTED_SEMET_SEC_MESEC_INT0_H2    | -1.57 | 1.62 | 0 | 0 | 0 | Repressed |
| 1282 | REACTOME_HSF1_ACTIVATION                                   | -1.57 | 1.59 | 0 | 0 | 0 | Repressed |
| 1283 | PID_RETINOIC_ACID_PATHWAY                                  | -1.57 | 1.58 | 0 | 0 | 0 | Repressed |
| 1284 | CHR3P14                                                    | -1.57 | 1.57 | 0 | 0 | 0 | Repressed |
| 1285 | LEE_LIVER_CANCER_DENA_UP                                   | -1.57 | 1.56 | 0 | 0 | 0 | Repressed |
| 1286 | GO_MATURE_RIBOSOME_ASSEMBLY                                | -1.57 | 1.55 | 0 | 0 | 0 | Repressed |
| 1287 | GO_P_P_BOND_HYDROLYSIS_DRIVEN_PROTEIN_TRANSMEMBRANE_TRA    | -1.57 | 1.55 | 0 | 0 | 0 | Repressed |
| 1288 | GO_REGULATION_OF_SUPEROXIDE_ANION_GENERATION               | -1.57 | 1.54 | 0 | 0 | 0 | Repressed |
| 1289 | GO_POSITIVE_REGULATION_OF_MITOCHONDRIAL_CALCIIUM_ION_CONCE | -1.57 | 1.52 | 0 | 0 | 0 | Repressed |
| 1290 | GO_COMPACT_MYELIN                                          | -1.57 | 1.51 | 0 | 0 | 0 | Repressed |
| 1291 | REACTOME_ADP_SIGNALING_THROUGH_P2Y_PURINOCEPTOR_12         | -1.57 | 1.49 | 0 | 0 | 0 | Repressed |
| 1292 | REACTOME_SEMA3A_PAK_DEPENDENT_AXON_REPULSION               | -1.57 | 1.49 | 0 | 0 | 0 | Repressed |
| 1293 | GO_POSITIVE_REGULATION_OF_STEROID_BIOSYNTHETIC_PROCESS     | -1.57 | 1.48 | 0 | 0 | 0 | Repressed |
| 1294 | REACTOME ASPARTATE AND ASPARAGINE METABOLISM               | -1.57 | 1.48 | 0 | 0 | 0 | Repressed |
| 1295 | GO PEPTIDYL ARGININE METHYLATION                           | -1.57 | 1.47 | 0 | 0 | 0 | Repressed |
| 1296 | REACTOME_CELLULAR_HEXOSE_TRANSPORT                         | -1.57 | 1.47 | 0 | 0 | 0 | Repressed |

|      |                                                           |       |      |   |   |   |           |
|------|-----------------------------------------------------------|-------|------|---|---|---|-----------|
| 1297 | GO_THIOREDOXIN_PEROXIDASE_ACTIVITY                        | -1.57 | 1.46 | 0 | 0 | 0 | Repressed |
| 1298 | PIEPOLI_LG1_TARGETS_UP                                    | -1.57 | 1.46 | 0 | 0 | 0 | Repressed |
| 1299 | SUMI_HNF4A_TARGETS                                        | -1.57 | 1.45 | 0 | 0 | 0 | Repressed |
| 1300 | GO_POLY_G_BINDING                                         | -1.57 | 1.44 | 0 | 0 | 0 | Repressed |
| 1301 | GO_PSEUDOPODIUM                                           | -1.57 | 1.44 | 0 | 0 | 0 | Repressed |
| 1302 | GO_I_KAPPAB_PHOSPHORYLATION                               | -1.57 | 1.42 | 0 | 0 | 0 | Repressed |
| 1303 | GO_L_SERINE_METABOLIC_PROCESS                             | -1.57 | 1.41 | 0 | 0 | 0 | Repressed |
| 1304 | REACTOME_CHK1_CHK2_CDS1_MEDIATED_INACTIVATION_OF_CYCLIN_B | -1.57 | 1.41 | 0 | 0 | 0 | Repressed |
| 1305 | GO_SHORT_CHAIN_FATTY_ACID_CATABOLIC_PROCESS               | -1.57 | 1.38 | 0 | 0 | 0 | Repressed |
| 1306 | DALESSIO_TSA_RESPONSE                                     | -1.57 | 1.35 | 0 | 0 | 0 | Repressed |
| 1307 | GO_RESPONSE_TO_CORTICOSTERONE                             | -1.57 | 1.30 | 0 | 0 | 0 | Repressed |
| 1308 | FLECHNER_BIOPSY_KIDNEY_TRANSPLANT_OK_VS_DONOR_UP          | -1.56 | 4.00 | 0 | 0 | 0 | Repressed |
| 1309 | GO_RESPONSE_TO_CYTOKINE                                   | -1.56 | 4.00 | 0 | 0 | 0 | Repressed |
| 1310 | GROSS_HYPOXIA_VIA_ELK3_UP                                 | -1.56 | 4.00 | 0 | 0 | 0 | Repressed |
| 1311 | MULLIGHAN_MLL_SIGNATURE_2_UP                              | -1.56 | 4.00 | 0 | 0 | 0 | Repressed |
| 1312 | RICKMAN_TUMOR_DIFFERENTIATED_WELL_VS_POORLY_DN            | -1.56 | 4.00 | 0 | 0 | 0 | Repressed |
| 1313 | SCHUETZ_BREAST_CANCER_DUCTAL_INVASIVE_UP                  | -1.56 | 4.00 | 0 | 0 | 0 | Repressed |
| 1314 | SHEN_SMARCA2_TARGETS_DN                                   | -1.56 | 4.00 | 0 | 0 | 0 | Repressed |
| 1315 | HUANG_GATA2_TARGETS_DN                                    | -1.56 | 2.55 | 0 | 0 | 0 | Repressed |
| 1316 | GO_COENZYME_BIOSYNTHETIC_PROCESS                          | -1.56 | 2.50 | 0 | 0 | 0 | Repressed |
| 1317 | HALLMARK_ESTROGEN_RESPONSE_EARLY                          | -1.56 | 2.50 | 0 | 0 | 0 | Repressed |
| 1318 | CYCLIN_D1_KE_V1_UP                                        | -1.56 | 2.49 | 0 | 0 | 0 | Repressed |
| 1319 | HALLMARK_ALLOGRAFT_REJECTION                              | -1.56 | 2.48 | 0 | 0 | 0 | Repressed |
| 1320 | HALLMARK_ESTROGEN_RESPONSE_LATE                           | -1.56 | 2.48 | 0 | 0 | 0 | Repressed |
| 1321 | CAHOY_ASTROCYTIC                                          | -1.56 | 2.26 | 0 | 0 | 0 | Repressed |
| 1322 | GO_RIBOSOMAL_LARGE_SUBUNIT_BIOGENESIS                     | -1.56 | 2.09 | 0 | 0 | 0 | Repressed |
| 1323 | KEGG_CYTOKINE_CYTOKINE_RECEPTOR_INTERACTION               | -1.56 | 2.07 | 0 | 0 | 0 | Repressed |
| 1324 | HIRSCH_CELLULAR_TRANSFORMATION_SIGNATURE_DN               | -1.56 | 2.06 | 0 | 0 | 0 | Repressed |
| 1325 | DUNNE_TARGETS_OF_AML1_MTG8_FUSION_UP                      | -1.56 | 1.97 | 0 | 0 | 0 | Repressed |
| 1326 | REACTOME_RNA_POLYMERASE_II_TRANSCRIPTION_TERMINATION      | -1.56 | 1.81 | 0 | 0 | 0 | Repressed |
| 1327 | GO_SPINDLE_MIDZONE                                        | -1.56 | 1.78 | 0 | 0 | 0 | Repressed |
| 1328 | GO_ENDOPEPTIDASE_REGULATOR_ACTIVITY                       | -1.56 | 1.76 | 0 | 0 | 0 | Repressed |
| 1329 | GO_DNA_REPLICATION_DEPENDENT_NUCLEOSOME_ORGANIZATION      | -1.56 | 1.69 | 0 | 0 | 0 | Repressed |
| 1330 | HUANG_DASATINIB_RESISTANCE_UP                             | -1.56 | 1.69 | 0 | 0 | 0 | Repressed |
| 1331 | GO_REGULATION_OF_RESPONSE_TO_OXIDATIVE_STRESS             | -1.56 | 1.68 | 0 | 0 | 0 | Repressed |
| 1332 | GO_REGULATION_OF_INTRACELLULAR_LIPID_TRANSPORT            | -1.56 | 1.65 | 0 | 0 | 0 | Repressed |
| 1333 | GO_MATURATION_OF_5_8S_RRNA_FROM_TRICISTRONIC_RRNA_TRANS   | -1.56 | 1.62 | 0 | 0 | 0 | Repressed |
| 1334 | TURASHVILI_BREAST_DUCTAL_CARCINOMA_VS_DUCTAL_NORMAL_UP    | -1.56 | 1.62 | 0 | 0 | 0 | Repressed |
| 1335 | GO_ENDOCHONDRAL_BONE_MORPHOGENESIS                        | -1.56 | 1.60 | 0 | 0 | 0 | Repressed |
| 1336 | BIOCARTA_CALCINEURIN_PATHWAY                              | -1.56 | 1.58 | 0 | 0 | 0 | Repressed |
| 1337 | GO_REGULATION_OF_VESICLE_FUSION                           | -1.56 | 1.58 | 0 | 0 | 0 | Repressed |
| 1338 | LEIN_NEURON_MARKERS                                       | -1.56 | 1.58 | 0 | 0 | 0 | Repressed |
| 1339 | GO_NEGATIVE_REGULATION_OF_INSULIN_SECRETION               | -1.56 | 1.54 | 0 | 0 | 0 | Repressed |
| 1340 | GO_FRUCTOSE_1_6_BISPHOSPHATE_METABOLIC_PROCESS            | -1.56 | 1.51 | 0 | 0 | 0 | Repressed |
| 1341 | GO_PROSTATE_GLAND_DEVELOPMENT                             | -1.56 | 1.51 | 0 | 0 | 0 | Repressed |
| 1342 | HE_PTEN_TARGETS_UP                                        | -1.56 | 1.51 | 0 | 0 | 0 | Repressed |
| 1343 | GO_NEGATIVE_REGULATION_OF_SUBSTRATE_ADHESION_DEPENDENT_I  | -1.56 | 1.48 | 0 | 0 | 0 | Repressed |
| 1344 | GO_PEBOW_COMPLEX                                          | -1.56 | 1.48 | 0 | 0 | 0 | Repressed |
| 1345 | GO_REGULATION_OF_T_HELPER_1_TYPE_IMMUNE_RESPONSE          | -1.56 | 1.48 | 0 | 0 | 0 | Repressed |
| 1346 | MARCINAK_ER_STRESS_RESPONSE_VIA_CHOP                      | -1.56 | 1.48 | 0 | 0 | 0 | Repressed |
| 1347 | LEE_LIVER_CANCER_E2F1_DN                                  | -1.56 | 1.47 | 0 | 0 | 0 | Repressed |
| 1348 | GO_DNA_PROTECTION                                         | -1.56 | 1.44 | 0 | 0 | 0 | Repressed |
| 1349 | GO_POSITIVE_REGULATION_OF_SUPEROXIDE_ANION_GENERATION     | -1.56 | 1.44 | 0 | 0 | 0 | Repressed |
| 1350 | KEGG_PRIMARY_BILE_ACID_BIOSYNTHESIS                       | -1.56 | 1.43 | 0 | 0 | 0 | Repressed |
| 1351 | SUH_COEXPRESSED_WITH_ID1_AND_ID2_UP                       | -1.56 | 1.43 | 0 | 0 | 0 | Repressed |
| 1352 | GO_FACIAL_NERVE_MORPHOGENESIS                             | -1.56 | 1.42 | 0 | 0 | 0 | Repressed |
| 1353 | GO_MEDIUM_CHAIN_FATTY_ACID_COA_LIGASE_ACTIVITY            | -1.56 | 1.42 | 0 | 0 | 0 | Repressed |
| 1354 | GO_NEUTRAL_LIPID_BIOSYNTHETIC_PROCESS                     | -1.56 | 1.42 | 0 | 0 | 0 | Repressed |
| 1355 | SCHURINGA_STAT5A_TARGETS_UP                               | -1.56 | 1.41 | 0 | 0 | 0 | Repressed |
| 1356 | GO_CENTROMERIC_SISTER_CHROMATID_COHESION                  | -1.56 | 1.39 | 0 | 0 | 0 | Repressed |
| 1357 | GO_CHOLESTEROL_CATABOLIC_PROCESS                          | -1.56 | 1.39 | 0 | 0 | 0 | Repressed |
| 1358 | GO_MYOBLAST_MIGRATION                                     | -1.56 | 1.39 | 0 | 0 | 0 | Repressed |
| 1359 | GO_CARBONYL_REDUCTASE_NADPH_ACTIVITY                      | -1.56 | 1.36 | 0 | 0 | 0 | Repressed |
| 1360 | GO_GDP DISSOCIATION INHIBITOR ACTIVITY                    | -1.56 | 1.28 | 0 | 0 | 0 | Repressed |
| 1361 | GO_CALCIIUM_CHANNEL_INHIBITOR_ACTIVITY                    | -1.56 | 1.25 | 0 | 0 | 0 | Repressed |
| 1362 | GO_FC_RECEPTOR_SIGNALING_PATHWAY                          | -1.55 | 4.00 | 0 | 0 | 0 | Repressed |
| 1363 | GO_SPINDLE_POLE                                           | -1.55 | 4.00 | 0 | 0 | 0 | Repressed |
| 1364 | LEE_LIVER_CANCER_SURVIVAL_DN                              | -1.55 | 4.00 | 0 | 0 | 0 | Repressed |
| 1365 | MONNIER_POSTRADIATION_TUMOR_ESCAPE_UP                     | -1.55 | 4.00 | 0 | 0 | 0 | Repressed |
| 1366 | REACTOME_CELLULAR_RESPONSES_TO_EXTERNAL_STIMULI           | -1.55 | 4.00 | 0 | 0 | 0 | Repressed |
| 1367 | REACTOME_MITOTIC_PROMETAPHASE                             | -1.55 | 4.00 | 0 | 0 | 0 | Repressed |
| 1368 | SWEET_LUNG_CANCER_KRAS_UP                                 | -1.55 | 4.00 | 0 | 0 | 0 | Repressed |
| 1369 | ZHENG_GLIOMASTOMA_PLASTICITY_UP                           | -1.55 | 2.45 | 0 | 0 | 0 | Repressed |
| 1370 | GO_RESPIRATORY_SYSTEM_DEVELOPMENT                         | -1.55 | 2.23 | 0 | 0 | 0 | Repressed |
| 1371 | HELLER_SILENCED_BY_METHYLATION_DN                         | -1.55 | 2.08 | 0 | 0 | 0 | Repressed |
| 1372 | HALLMARK_PEROXISOME                                       | -1.55 | 2.07 | 0 | 0 | 0 | Repressed |
| 1373 | GO_HEPATICOBILIARY_SYSTEM_DEVELOPMENT                     | -1.55 | 2.06 | 0 | 0 | 0 | Repressed |
| 1374 | GO_RIBOSOMAL_SMALL_SUBUNIT_BIOGENESIS                     | -1.55 | 2.06 | 0 | 0 | 0 | Repressed |
| 1375 | LIN_APC_TARGETS                                           | -1.55 | 1.96 | 0 | 0 | 0 | Repressed |
| 1376 | HOFFMANN_SMALL_PRE_BIL_TO_IMMATURE_B_LYMPHOCYTE_DN        | -1.55 | 1.90 | 0 | 0 | 0 | Repressed |
| 1377 | GO_POSITIVE_REGULATION_OF_TYPE_I_INTERFERON_PRODUCTION    | -1.55 | 1.77 | 0 | 0 | 0 | Repressed |
| 1378 | JOSEPH_RESPONSE_TO_SODIUM_BUTYRATE_DN                     | -1.55 | 1.70 | 0 | 0 | 0 | Repressed |
| 1379 | SCHMIDT_POR_TARGETS_IN_LIMB_BUD_UP                        | -1.55 | 1.68 | 0 | 0 | 0 | Repressed |
| 1380 | GO_STEREOCILIIUM_TIP                                      | -1.55 | 1.67 | 0 | 0 | 0 | Repressed |
| 1381 | GO_EXTRACELLULAR_MATRIX_CONSTITUENT_CONFERRING_ELASTICITY | -1.55 | 1.63 | 0 | 0 | 0 | Repressed |
| 1382 | LI_WILMS_TUMOR_ANAPLASTIC_UP                              | -1.55 | 1.63 | 0 | 0 | 0 | Repressed |
| 1383 | GO_CELLULAR_RESPONSE_TO_FATTY_ACID                        | -1.55 | 1.62 | 0 | 0 | 0 | Repressed |
| 1384 | GO_POSITIVE_REGULATION_OF_HORMONE_BIOSYNTHETIC_PROCESS    | -1.55 | 1.58 | 0 | 0 | 0 | Repressed |
| 1385 | GO_KINETOCHORE_BINDING                                    | -1.55 | 1.54 | 0 | 0 | 0 | Repressed |
| 1386 | GO_RNA_POLYMERASE_II_ACTIVITY                             | -1.55 | 1.53 | 0 | 0 | 0 | Repressed |
| 1387 | NGUYEN_NOTCH1_TARGETS_UP                                  | -1.55 | 1.53 | 0 | 0 | 0 | Repressed |
| 1388 | CHNG_MULTIPLE_MYELOMA_HYPERPLOID_DN                       | -1.55 | 1.49 | 0 | 0 | 0 | Repressed |
| 1389 | WUNDER_INFLAMMATORY_RESPONSE_AND_CHOLESTEROL_UP           | -1.55 | 1.49 | 0 | 0 | 0 | Repressed |
| 1390 | GO_MITOCHONDRIAL_RNA_3_END_PROCESSING                     | -1.55 | 1.46 | 0 | 0 | 0 | Repressed |
| 1391 | GO_REGULATION_OF_CARDIAC_MUSCLE_CONTRACTION_BY_CALCIIUM_I | -1.55 | 1.46 | 0 | 0 | 0 | Repressed |
| 1392 | REACTOME_DETOXIFICATION_OF_REACTIVE_OXYGEN_SPECIES        | -1.55 | 1.44 | 0 | 0 | 0 | Repressed |
| 1393 | KAPOSI_LIVER_CANCER_MET_UP                                | -1.55 | 1.43 | 0 | 0 | 0 | Repressed |
| 1394 | GO_SCHMIDT_LANTERMAN_INCISURE                             | -1.55 | 1.42 | 0 | 0 | 0 | Repressed |
| 1395 | FUNG_IL2_TARGETS_WITH_STAT5_BINDING_SITES                 | -1.55 | 1.40 | 0 | 0 | 0 | Repressed |
| 1396 | REACTOME_NOTCH2_INTRACELLULAR_DOMAIN_REGULATES_TRANSCRI   | -1.55 | 1.40 | 0 | 0 | 0 | Repressed |
| 1397 | REACTOME_PKA_MEDIATED_PHOSPHORYLATION_OF_CREB             | -1.55 | 1.40 | 0 | 0 | 0 | Repressed |
| 1398 | COLIN_PILOCYTIC_ASTROCYTOMA_VS_GLIOMASTOMA_UP             | -1.55 | 1.39 | 0 | 0 | 0 | Repressed |
| 1399 | LIU_IL13_PRIMING_MODEL                                    | -1.55 | 1.39 | 0 | 0 | 0 | Repressed |
| 1400 | GO_CELLULAR_RESPONSE_TO_OXYGEN_RADICAL                    | -1.55 | 1.38 | 0 | 0 | 0 | Repressed |
| 1401 | GO_PEPTIDE_CATABOLIC_PROCESS                              | -1.55 | 1.38 | 0 | 0 | 0 | Repressed |
| 1402 | GO_PRERIBOSOME_SMALL_SUBUNIT_PRECURSOR                    | -1.55 | 1.37 | 0 | 0 | 0 | Repressed |
| 1403 | GO_REGULATION_OF_PROTEIN_LOCALIZATION_TO_CHROMOSOME_TEL   | -1.55 | 1.37 | 0 | 0 | 0 | Repressed |
| 1404 | GO_NEGATIVE_REGULATION_OF_RESPONSE_TO_DRUG                | -1.55 | 1.36 | 0 | 0 | 0 | Repressed |
| 1405 | GO_NEGATIVE_REGULATION_OF_T_CELL_APOPTOTIC_PROCESS        | -1.55 | 1.36 | 0 | 0 | 0 | Repressed |

|      |                                                             |       |      |   |   |   |           |
|------|-------------------------------------------------------------|-------|------|---|---|---|-----------|
| 1406 | GO_PULMONARY_VALVE_DEVELOPMENT                              | -1.55 | 1.36 | 0 | 0 | 0 | Repressed |
| 1407 | GO_EYELID_DEVELOPMENT_IN_CAMERA_TYPE_EYE                    | -1.55 | 1.34 | 0 | 0 | 0 | Repressed |
| 1408 | GO_N_TERMINAL_PROTEIN_ACETYLTTRANSFERASE_COMPLEX            | -1.55 | 1.33 | 0 | 0 | 0 | Repressed |
| 1409 | REACTOME_INTEGRATION_OF_PROVIRUS                            | -1.55 | 1.31 | 0 | 0 | 0 | Repressed |
| 1410 | GO_PULMONARY_VALVE_MORPHOGENESIS                            | -1.55 | 1.30 | 0 | 0 | 0 | Repressed |
| 1411 | GO_NEGATIVE_REGULATION_OF_TELOMERASE_ACTIVITY               | -1.55 | 1.28 | 0 | 0 | 0 | Repressed |
| 1412 | GO_POSITIVE_REGULATION_OF_OXIDATIVE_PHOSPHORYLATION         | -1.55 | 1.27 | 0 | 0 | 0 | Repressed |
| 1413 | GO_REGULATION_OF_UNSATURATED_FATTY_ACID_BIOSYNTHETIC_PRC    | -1.55 | 1.21 | 0 | 0 | 0 | Repressed |
| 1414 | GO_RESPONSE_TO_LIPID                                        | -1.54 | 4.00 | 0 | 0 | 0 | Repressed |
| 1415 | MULLIGHAN_MLL_SIGNATURE_1_UP                                | -1.54 | 4.00 | 0 | 0 | 0 | Repressed |
| 1416 | REACTOME_INTERFERON_SIGNALING                               | -1.54 | 4.00 | 0 | 0 | 0 | Repressed |
| 1417 | ELVIDGE_HIF1A_TARGETS_DN                                    | -1.54 | 2.25 | 0 | 0 | 0 | Repressed |
| 1418 | GO_COLLAGEN_CONTAINING_EXTRACELLULAR_MATRIX                 | -1.54 | 2.20 | 0 | 0 | 0 | Repressed |
| 1419 | GRABARCZYK_BCL11B_TARGETS_UP                                | -1.54 | 2.07 | 0 | 0 | 0 | Repressed |
| 1420 | LANDIS_ERBB2_BREAST_TUMORS_324_DN                           | -1.54 | 2.06 | 0 | 0 | 0 | Repressed |
| 1421 | GO_TRANSCRIPTION_BY_RNA_POLYMERASE_I                        | -1.54 | 1.88 | 0 | 0 | 0 | Repressed |
| 1422 | GO_SUBSTRATE_ADHESION_DEPENDENT_CELL_SPREADING              | -1.54 | 1.87 | 0 | 0 | 0 | Repressed |
| 1423 | GO_RESPONSE_TO_AMINO_ACID                                   | -1.54 | 1.86 | 0 | 0 | 0 | Repressed |
| 1424 | VANHARANTA_UTERINE_FIBROID_WITH_7Q_DELETION_UP              | -1.54 | 1.79 | 0 | 0 | 0 | Repressed |
| 1425 | BRACHAT_RESPONSE_TO_CAMPTOTHECIN_DN                         | -1.54 | 1.77 | 0 | 0 | 0 | Repressed |
| 1426 | GO_VENTRICULAR_CARDIAC_MUSCLE_TISSUE_DEVELOPMENT            | -1.54 | 1.75 | 0 | 0 | 0 | Repressed |
| 1427 | GO_MITOTIC_SPINDLE_ASSEMBLY                                 | -1.54 | 1.72 | 0 | 0 | 0 | Repressed |
| 1428 | KEGG_TYROSINE_METABOLISM                                    | -1.54 | 1.55 | 0 | 0 | 0 | Repressed |
| 1429 | GO_MYELIN_SHEATH                                            | -1.54 | 1.54 | 0 | 0 | 0 | Repressed |
| 1430 | GO_DICARBOXYLIC_ACID_BIOSYNTHETIC_PROCESS                   | -1.54 | 1.49 | 0 | 0 | 0 | Repressed |
| 1431 | GO_NEGATIVE_REGULATION_OF_MRNA_PROCESSING                   | -1.54 | 1.49 | 0 | 0 | 0 | Repressed |
| 1432 | SIG_REGULATION_OF_THE_ACTIN_CYTOSKELETON_BY_RHO_GTPASES     | -1.54 | 1.49 | 0 | 0 | 0 | Repressed |
| 1433 | CHR12Q22                                                    | -1.54 | 1.48 | 0 | 0 | 0 | Repressed |
| 1434 | GO_OXIDATIVE_RNA_DEMETHYLASE_ACTIVITY                       | -1.54 | 1.48 | 0 | 0 | 0 | Repressed |
| 1435 | GO_U2_TYPE_CATALYTIC_STEP_2_SPLICEOSOME                     | -1.54 | 1.47 | 0 | 0 | 0 | Repressed |
| 1436 | GO_OXIDATIVE_RNA_DEMETHYLATION                              | -1.54 | 1.46 | 0 | 0 | 0 | Repressed |
| 1437 | GO_HYDROLASE_ACTIVITY_ACTING_ON_CARBON_NITROGEN_BUT_NOT     | -1.54 | 1.45 | 0 | 0 | 0 | Repressed |
| 1438 | GO_NECROPTOTIC_SIGNALING_PATHWAY                            | -1.54 | 1.45 | 0 | 0 | 0 | Repressed |
| 1439 | NIELSEN_SCHWANNOMA_UP                                       | -1.54 | 1.43 | 0 | 0 | 0 | Repressed |
| 1440 | BIOCARTA_PRION_PATHWAY                                      | -1.54 | 1.42 | 0 | 0 | 0 | Repressed |
| 1441 | GO_POSITIVE_REGULATION_OF_POTASSIUM_ION_TRANSPORT           | -1.54 | 1.41 | 0 | 0 | 0 | Repressed |
| 1442 | GO_EXTRACELLULAR_MATRIX_COMPONENT                           | -1.54 | 1.40 | 0 | 0 | 0 | Repressed |
| 1443 | GO_POLYADENYLATION_DEPENDENT_RNA_CATABOLIC_PROCESS          | -1.54 | 1.40 | 0 | 0 | 0 | Repressed |
| 1444 | GO_TRACHEA_DEVELOPMENT                                      | -1.54 | 1.39 | 0 | 0 | 0 | Repressed |
| 1445 | REACTOME_IMPORT_OF_PALMITOYL_COA_INTO_THE_MITOCHONDRIAL_    | -1.54 | 1.39 | 0 | 0 | 0 | Repressed |
| 1446 | BIOCARTA_CDMAC_PATHWAY                                      | -1.54 | 1.38 | 0 | 0 | 0 | Repressed |
| 1447 | BIOCARTA_RAN_PATHWAY                                        | -1.54 | 1.37 | 0 | 0 | 0 | Repressed |
| 1448 | GO_SPECTRIN_BINDING                                         | -1.54 | 1.34 | 0 | 0 | 0 | Repressed |
| 1449 | BIOCARTA_TID_PATHWAY                                        | -1.54 | 1.33 | 0 | 0 | 0 | Repressed |
| 1450 | DAZARD_UV_RESPONSE_CLUSTER_G4                               | -1.54 | 1.33 | 0 | 0 | 0 | Repressed |
| 1451 | GO_5_3_DNA_HELICASE_ACTIVITY                                | -1.54 | 1.32 | 0 | 0 | 0 | Repressed |
| 1452 | GO_POSITIVE_REGULATION_OF_G_PROTEIN_COUPLED_RECEPTOR_SIG    | -1.54 | 1.29 | 0 | 0 | 0 | Repressed |
| 1453 | REACTOME_NEF_MEDIATES_DOWN_MODULATION_OF_CELL_SURFACE_      | -1.54 | 1.29 | 0 | 0 | 0 | Repressed |
| 1454 | GO_CALCILIUM_ION_EXPORT                                     | -1.54 | 1.28 | 0 | 0 | 0 | Repressed |
| 1455 | GO_VITAMIN_TRANSMEMBRANE_TRANSPORTER_ACTIVITY               | -1.54 | 1.28 | 0 | 0 | 0 | Repressed |
| 1456 | GO_EXONUCLEOLYTIC_TRIMMING_INVOLVED_IN_RRNA_PROCESSING      | -1.54 | 1.24 | 0 | 0 | 0 | Repressed |
| 1457 | CHEN_HOXA5_TARGETS_6HR_UP                                   | -1.54 | 1.23 | 0 | 0 | 0 | Repressed |
| 1458 | PLASARI_NFIC_TARGETS_BASAL_DN                               | -1.54 | 1.23 | 0 | 0 | 0 | Repressed |
| 1459 | REACTOME_TETRAHYDROBIOPTERIN_BH4_SYNTHESIS_RECYCLING_SAL    | -1.54 | 1.21 | 0 | 0 | 0 | Repressed |
| 1460 | GO_ENDOLYSOSOME                                             | -1.54 | 1.20 | 0 | 0 | 0 | Repressed |
| 1461 | GO_U5_SNRNP                                                 | -1.54 | 1.19 | 0 | 0 | 0 | Repressed |
| 1462 | GO_NIK_NF_KAPPAB_SIGNALING                                  | -1.53 | 4.00 | 0 | 0 | 0 | Repressed |
| 1463 | GO_SISTER_CHROMATID_SEGREGATION                             | -1.53 | 4.00 | 0 | 0 | 0 | Repressed |
| 1464 | KREG_KDM3A_TARGETS_NOT_HYPOXIA                              | -1.53 | 4.00 | 0 | 0 | 0 | Repressed |
| 1465 | MARKEY_RB1_ACUTE_LOF_UP                                     | -1.53 | 4.00 | 0 | 0 | 0 | Repressed |
| 1466 | MATSUDA_NATURAL_KILLER_DIFFERENTIATION                      | -1.53 | 4.00 | 0 | 0 | 0 | Repressed |
| 1467 | REACTOME_MAPK_FAMILY_SIGNALING_CASCADES                     | -1.53 | 4.00 | 0 | 0 | 0 | Repressed |
| 1468 | REACTOME_SIGNALING_BY_INTERLEUKINS                          | -1.53 | 4.00 | 0 | 0 | 0 | Repressed |
| 1469 | SANSOM_APC_TARGETS_REQUIRE_MYC                              | -1.53 | 4.00 | 0 | 1 | 0 | Repressed |
| 1470 | SERVITJA_ISLET_HNF1A_TARGETS_UP                             | -1.53 | 2.52 | 0 | 0 | 0 | Repressed |
| 1471 | GO_PROTEIN_LOCALIZATION_TO_MITOCHONDRION                    | -1.53 | 2.51 | 0 | 0 | 0 | Repressed |
| 1472 | EIF4E_UP                                                    | -1.53 | 2.22 | 0 | 0 | 0 | Repressed |
| 1473 | GO_LEUKOCYTE_APOPTOTIC_PROCESS                              | -1.53 | 2.22 | 0 | 0 | 0 | Repressed |
| 1474 | GO_STEROID_BIOSYNTHETIC_PROCESS                             | -1.53 | 2.20 | 0 | 0 | 0 | Repressed |
| 1475 | REACTOME_GOLGI_TO_ER_RETROGRADE_TRANSPORT                   | -1.53 | 1.99 | 0 | 0 | 0 | Repressed |
| 1476 | HU_ANGIOGENESIS_DN                                          | -1.53 | 1.91 | 0 | 0 | 0 | Repressed |
| 1477 | GO_CELLULAR_RESPONSE_TO_KETONE                              | -1.53 | 1.85 | 0 | 0 | 0 | Repressed |
| 1478 | BOYALTY_LIVER_CANCER_SUBCLASS_G6_UP                         | -1.53 | 1.70 | 0 | 0 | 0 | Repressed |
| 1479 | GO_CELLULAR_DETOXIFICATION                                  | -1.53 | 1.68 | 0 | 0 | 0 | Repressed |
| 1480 | CRONQUIST_NRAS_VS_STROMAL_STIMULATION_UP                    | -1.53 | 1.61 | 0 | 0 | 0 | Repressed |
| 1481 | HALLMARK_CHOLESTEROL_HOMEOSTASIS                            | -1.53 | 1.61 | 0 | 0 | 0 | Repressed |
| 1482 | KEGG_PENTOSE_PHOSPHATE_PATHWAY                              | -1.53 | 1.49 | 0 | 0 | 0 | Repressed |
| 1483 | GO_GENITALIA_DEVELOPMENT                                    | -1.53 | 1.46 | 0 | 0 | 0 | Repressed |
| 1484 | GO_POSITIVE_REGULATION_OF_CALCILIUM_ION_TRANSMEMBRANE_TRAN  | -1.53 | 1.44 | 0 | 0 | 0 | Repressed |
| 1485 | WILSON_PROTEASES_AT_TUMOR_BONE_INTERFACE_UP                 | -1.53 | 1.44 | 0 | 0 | 0 | Repressed |
| 1486 | GO_CELLULAR_DEFENSE_RESPONSE                                | -1.53 | 1.42 | 0 | 0 | 0 | Repressed |
| 1487 | GO_NEGATIVE_REGULATION_OF_RELEASE_OF_CYTOCHROME_C_FROM      | -1.53 | 1.42 | 0 | 0 | 0 | Repressed |
| 1488 | REACTOME_THE_ROLE_OF_NEF_IN_HIV_1_REPLICATION_AND_DISEASE_  | -1.53 | 1.42 | 0 | 0 | 0 | Repressed |
| 1489 | GO_ETHANOL_OXIDATION                                        | -1.53 | 1.41 | 0 | 0 | 0 | Repressed |
| 1490 | MARIADASON_RESPONSE_TO_CURCUMIN_SULINDAC_5                  | -1.53 | 1.41 | 0 | 0 | 0 | Repressed |
| 1491 | GO_ALDITOL_METABOLIC_PROCESS                                | -1.53 | 1.40 | 0 | 0 | 0 | Repressed |
| 1492 | GO_MUSCLE_FILAMENT_SLIDING                                  | -1.53 | 1.40 | 0 | 0 | 0 | Repressed |
| 1493 | GO_REGULATION_OF_SUBSTRATE_ADHESION_DEPENDENT_CELL_SPRE     | -1.53 | 1.40 | 0 | 0 | 0 | Repressed |
| 1494 | GO_MITOCHONDRIAL_RESPIRATORY_CHAIN_COMPLEX_IV               | -1.53 | 1.38 | 0 | 0 | 0 | Repressed |
| 1495 | BIOCARTA_ARENRF2_PATHWAY                                    | -1.53 | 1.36 | 0 | 0 | 0 | Repressed |
| 1496 | GO_AMP_BINDING                                              | -1.53 | 1.36 | 0 | 0 | 0 | Repressed |
| 1497 | GO_NEGATIVE_REGULATION_OF_PEPTIDE_HORMONE_SECRETION         | -1.53 | 1.36 | 0 | 0 | 0 | Repressed |
| 1498 | KIM_HYPOXIA                                                 | -1.53 | 1.36 | 0 | 0 | 0 | Repressed |
| 1499 | REACTOME_PROSTACYCLIN_SIGNALING_THROUGH_PROSTACYCLIN_RI     | -1.53 | 1.36 | 0 | 0 | 0 | Repressed |
| 1500 | GO_POSITIVE_REGULATION_OF_VESICLE_FUSION                    | -1.53 | 1.34 | 0 | 0 | 0 | Repressed |
| 1501 | GO_MITOCHONDRIAL_TRNA_METHYLATION                           | -1.53 | 1.33 | 0 | 0 | 0 | Repressed |
| 1502 | GO_REGULATION_OF_RYANODINE_SENSITIVE_CALCILIUM_RELEASE_CHAN | -1.53 | 1.32 | 0 | 0 | 0 | Repressed |
| 1503 | NIELSEN_GIST_VS_SYNOVIAL_SARCOMA_DN                         | -1.53 | 1.32 | 0 | 0 | 0 | Repressed |
| 1504 | GO_TRANSLATION_TERMINATION_FACTOR_ACTIVITY                  | -1.53 | 1.31 | 0 | 0 | 0 | Repressed |
| 1505 | REACTOME_TNFS_BIND_THEIR_PHYSIOLOGICAL_RECEPTORS            | -1.53 | 1.31 | 0 | 0 | 0 | Repressed |
| 1506 | GO_ACYLGLYCEROL_HOMEOSTASIS                                 | -1.53 | 1.29 | 0 | 0 | 0 | Repressed |
| 1507 | YIH_RESPONSE_TO_ARSENITE_C1                                 | -1.53 | 1.29 | 0 | 0 | 0 | Repressed |
| 1508 | GO_BASE_CONVERSION_OR_SUBSTITUTION_EDITING                  | -1.53 | 1.28 | 0 | 0 | 0 | Repressed |
| 1509 | GO_T_CELL_EXTRAVASATION                                     | -1.53 | 1.27 | 0 | 0 | 0 | Repressed |
| 1510 | LANDIS_ERBB2_BREAST_PRENEOPLASTIC_UP                        | -1.53 | 1.27 | 0 | 0 | 0 | Repressed |
| 1511 | GO_SMN_COMPLEX                                              | -1.53 | 1.25 | 0 | 0 | 0 | Repressed |
| 1512 | GO_NEGATIVE_REGULATION_OF_CELLULAR_RESPONSE_TO_DRUG         | -1.53 | 1.23 | 0 | 0 | 0 | Repressed |
| 1513 | MCCLUNG_DELTA_FOSB_TARGETS_2WK                              | -1.53 | 1.22 | 0 | 0 | 0 | Repressed |
| 1514 | LE_NEURONAL_DIFFERENTIATION_DN                              | -1.53 | 1.19 | 0 | 0 | 0 | Repressed |

|      |                                                          |       |      |   |   |   |           |
|------|----------------------------------------------------------|-------|------|---|---|---|-----------|
| 1515 | GO_RIBONUCLEOPROTEIN_COMPLEX                             | -1.52 | 4.00 | 0 | 0 | 0 | Repressed |
| 1516 | GOBERT_OLIGODENDROCYTE_DIFFERENTIATION_UP                | -1.52 | 4.00 | 0 | 0 | 0 | Repressed |
| 1517 | RHEIN_ALL_GLUCCOCORTICOID_THERAPY_DN                     | -1.52 | 4.00 | 0 | 0 | 0 | Repressed |
| 1518 | MYC_UP.V1_UP                                             | -1.52 | 2.49 | 0 | 0 | 0 | Repressed |
| 1519 | FARMER_BREAST_CANCER_BASAL_VS_LUMINAL                    | -1.52 | 2.38 | 0 | 0 | 0 | Repressed |
| 1520 | GO_OXIDOREDUCTASE_ACTIVITY_ACTING_ON_A_SULFUR_GROUP_OF_I | -1.52 | 1.99 | 0 | 0 | 0 | Repressed |
| 1521 | GO_HEAT_SHOCK_PROTEIN_BINDING                            | -1.52 | 1.95 | 0 | 0 | 0 | Repressed |
| 1522 | GO_PEPTIDASE_REGULATOR_ACTIVITY                          | -1.52 | 1.95 | 0 | 0 | 0 | Repressed |
| 1523 | GO_NON_CANONICAL_WNT_SIGNALING_PATHWAY                   | -1.52 | 1.91 | 0 | 0 | 0 | Repressed |
| 1524 | OUELLET_CULTURED_OVARIAN_CANCER_INVASIVE_VS_LMP_UP       | -1.52 | 1.88 | 0 | 0 | 0 | Repressed |
| 1525 | GO_REGULATION_OF_CHROMOSOME_SEPARATION                   | -1.52 | 1.86 | 0 | 0 | 0 | Repressed |
| 1526 | DAZARD_UV_RESPONSE_CLUSTER_G1                            | -1.52 | 1.73 | 0 | 0 | 0 | Repressed |
| 1527 | GO_ALPHA_AMINO_ACID_BIOSYNTHETIC_PROCESS                 | -1.52 | 1.73 | 0 | 0 | 0 | Repressed |
| 1528 | KEGG_PEROXSOME                                           | -1.52 | 1.73 | 0 | 0 | 0 | Repressed |
| 1529 | ACOSTA_PROLIFERATION_INDEPENDENT_MYC_TARGETS_UP          | -1.52 | 1.71 | 0 | 1 | 0 | Repressed |
| 1530 | GO_NEGATIVE_REGULATION_OF_RESPONSE_TO_WOUNDING           | -1.52 | 1.69 | 0 | 0 | 0 | Repressed |
| 1531 | PID_AURORA_A_PATHWAY                                     | -1.52 | 1.65 | 0 | 0 | 0 | Repressed |
| 1532 | BERENJENO_ROCK_SIGNALING_NOT_VIA_RHOA_DN                 | -1.52 | 1.51 | 0 | 0 | 0 | Repressed |
| 1533 | GO_MAINTENANCE_OF_DNA_REPEAT_ELEMENTS                    | -1.52 | 1.48 | 0 | 0 | 0 | Repressed |
| 1534 | GO_RELAXATION_OF_SMOOTH_MUSCLE                           | -1.52 | 1.44 | 0 | 0 | 0 | Repressed |
| 1535 | TSUNODA_CISPLATIN_RESISTANCE_DN                          | -1.52 | 1.43 | 0 | 0 | 0 | Repressed |
| 1536 | KEGG_SELENOAMINO_ACID_METABOLISM                         | -1.52 | 1.39 | 0 | 0 | 0 | Repressed |
| 1537 | GO_REGULATION_OF_PANCREATIC_JUICE_SECRETION              | -1.52 | 1.37 | 0 | 0 | 0 | Repressed |
| 1538 | GO_NEGATIVE_REGULATION_OF_INTERLEUKIN_8_SECRETION        | -1.52 | 1.36 | 0 | 0 | 0 | Repressed |
| 1539 | CREIGHTON_AKT1_SIGNALING_VIA_MTOR_DN                     | -1.52 | 1.35 | 0 | 0 | 0 | Repressed |
| 1540 | NAKAJIMA_EOSINOPHIL                                      | -1.52 | 1.35 | 0 | 0 | 0 | Repressed |
| 1541 | GO_CAMP_DEPENDENT_PROTEIN_KINASE_INHIBITOR_ACTIVITY      | -1.52 | 1.34 | 0 | 0 | 0 | Repressed |
| 1542 | BAFNA_MUC4_TARGETS_UP                                    | -1.52 | 1.28 | 0 | 0 | 0 | Repressed |
| 1543 | GO_HETEROTRIMERIC_G_PROTEIN_COMPLEX                      | -1.52 | 1.28 | 0 | 0 | 0 | Repressed |
| 1544 | GO_NUCLEOLAR_LARGE_RRNA_TRANSCRIPTION_BY_RNA_POLYMERASE  | -1.52 | 1.26 | 0 | 0 | 0 | Repressed |
| 1545 | GO_IMMUNOLOGICAL_SYNAPSE_FORMATION                       | -1.52 | 1.24 | 0 | 0 | 0 | Repressed |
| 1546 | GO_REGULATION_OF_RIBONUCLEASE_ACTIVITY                   | -1.52 | 1.24 | 0 | 0 | 0 | Repressed |
| 1547 | GO_S100_PROTEIN_BINDING                                  | -1.52 | 1.23 | 0 | 0 | 0 | Repressed |
| 1548 | GO_PROTEIN_FOLDING_IN_ENDOPLASMIC_RETICULUM              | -1.52 | 1.20 | 0 | 0 | 0 | Repressed |
| 1549 | SMID_BREAST_CANCER_RELAPSE_IN_LUNG_UP                    | -1.52 | 1.19 | 0 | 0 | 0 | Repressed |
| 1550 | GO_CELL_CYCLE_PHASE_TRANSITION                           | -1.51 | 4.00 | 0 | 0 | 0 | Repressed |
| 1551 | GO_CIRCULATORY_SYSTEM_PROCESS                            | -1.51 | 4.00 | 0 | 0 | 0 | Repressed |
| 1552 | GO_REGULATION_OF_GENERATION_OF_PRECURSOR_METABOLITES_AI  | -1.51 | 4.00 | 0 | 0 | 0 | Repressed |
| 1553 | HOSHIDA_LIVER_CANCER_SUBCLASS_S1                         | -1.51 | 4.00 | 0 | 0 | 0 | Repressed |
| 1554 | GO_MODIFICATION_OF_MORPHOLOGY_OR_PHYSIOLOGY_OF_OTHER_C   | -1.51 | 2.53 | 0 | 0 | 0 | Repressed |
| 1555 | GO_CELLULAR_RESPONSE_TO_BIOTIC_STIMULUS                  | -1.51 | 2.49 | 0 | 0 | 0 | Repressed |
| 1556 | GO_MODIFICATION_OF_MORPHOLOGY_OR_PHYSIOLOGY_OF_OTHER_C   | -1.51 | 2.22 | 0 | 0 | 0 | Repressed |
| 1557 | GO_SKELETAL_MUSCLE_ORGAN_DEVELOPMENT                     | -1.51 | 2.22 | 0 | 0 | 0 | Repressed |
| 1558 | HELLER_SILENCED_BY_METHYLATION_UP                        | -1.51 | 2.17 | 0 | 0 | 0 | Repressed |
| 1559 | SMIRNOV_CIRCULATING_ENDOTHELIOCYTES_IN_CANCER_UP         | -1.51 | 2.04 | 0 | 0 | 0 | Repressed |
| 1560 | GO_CELLULAR_GLUCCOSE_HOMEOSTASIS                         | -1.51 | 2.03 | 0 | 0 | 0 | Repressed |
| 1561 | GO_PLATELET_DEGRANULATION                                | -1.51 | 1.97 | 0 | 0 | 0 | Repressed |
| 1562 | MIKKELSEN_ES_LCP_WITH_H3K4ME3                            | -1.51 | 1.95 | 0 | 0 | 0 | Repressed |
| 1563 | ATF2_S_UP.V1_UP                                          | -1.51 | 1.83 | 0 | 0 | 0 | Repressed |
| 1564 | BHATTACHARYA_EMBRYONIC_STEM_CELL                         | -1.51 | 1.76 | 0 | 0 | 0 | Repressed |
| 1565 | PETROVA_ENDOTHELIUM_LYMPHATIC_VS_BLOOD_UP                | -1.51 | 1.73 | 0 | 0 | 0 | Repressed |
| 1566 | GO_REGULATION_OF_PROTEIN_COMPLEX_DISASSEMBLY             | -1.51 | 1.70 | 0 | 0 | 0 | Repressed |
| 1567 | GROSS_HYPOXIA_VIA_HIF1A_UP                               | -1.51 | 1.56 | 0 | 0 | 0 | Repressed |
| 1568 | GO_IMP_BIOSYNTHETIC_PROCESS                              | -1.51 | 1.52 | 0 | 0 | 0 | Repressed |
| 1569 | DELPIECH_FOXO3_TARGETS_DN                                | -1.51 | 1.50 | 0 | 0 | 0 | Repressed |
| 1570 | PID_P13KCI_AKT_PATHWAY                                   | -1.51 | 1.50 | 0 | 0 | 0 | Repressed |
| 1571 | REACTOME_PHASE_II_CONIUGATION_OF_COMPOUNDS               | -1.51 | 1.47 | 0 | 0 | 0 | Repressed |
| 1572 | ASTIER_INTEGRIN_SIGNALING                                | -1.51 | 1.43 | 0 | 0 | 0 | Repressed |
| 1573 | REACTOME_PROCESSING_OF_INTRONLESS_PRE_MRNAS              | -1.51 | 1.41 | 0 | 0 | 0 | Repressed |
| 1574 | GO_GLYCINE_BINDING                                       | -1.51 | 1.40 | 0 | 0 | 0 | Repressed |
| 1575 | GO_POSTTRANSLATIONAL_PROTEIN_TARGETING_TO_MEMBRANE_TRAN  | -1.51 | 1.38 | 0 | 0 | 0 | Repressed |
| 1576 | GO_SARCOPLASMIC_RETICULUM_MEMBRANE                       | -1.51 | 1.37 | 0 | 0 | 0 | Repressed |
| 1577 | REACTOME_INTERACTIONS_OF_VPR_WITH_HOST_CELLULAR_PROTEINS | -1.51 | 1.36 | 0 | 0 | 0 | Repressed |
| 1578 | MCMURRAY_TP53_HRAS_COOPERATION_RESPONSE_DN               | -1.51 | 1.34 | 0 | 0 | 0 | Repressed |
| 1579 | GO_POTASSIUM_TRANSPORTING_ATPASE_ACTIVITY                | -1.51 | 1.33 | 0 | 0 | 0 | Repressed |
| 1580 | CAMPS_COLON_CANCER_COPY_NUMBER_DN                        | -1.51 | 1.31 | 0 | 0 | 0 | Repressed |
| 1581 | GO_PROTEIN_PHOSPHATASE_TYPE_2A_COMPLEX                   | -1.51 | 1.30 | 0 | 0 | 0 | Repressed |
| 1582 | AMIT_EGF_RESPONSE_40_MCF10A                              | -1.51 | 1.29 | 0 | 0 | 0 | Repressed |
| 1583 | GO_RESPONSE_TO_THYROID_HORMONE                           | -1.51 | 1.29 | 0 | 0 | 0 | Repressed |
| 1584 | GO_PROTEASOME_CORE_COMPLEX_BETA_SUBUNIT_COMPLEX          | -1.51 | 1.28 | 0 | 0 | 0 | Repressed |
| 1585 | GO_VESICLE_CARGO_LOADING                                 | -1.51 | 1.28 | 0 | 0 | 0 | Repressed |
| 1586 | PID_RANBP2_PATHWAY                                       | -1.51 | 1.28 | 0 | 0 | 0 | Repressed |
| 1587 | KERLEY_RESPONSE_TO_CISPLATIN_UP                          | -1.51 | 1.27 | 0 | 0 | 0 | Repressed |
| 1588 | GO_PROTEIN_LIPOYLATION                                   | -1.51 | 1.26 | 0 | 0 | 0 | Repressed |
| 1589 | GO_REGULATION_OF_UBIQUITIN_PROTEIN_LIGASE_ACTIVITY       | -1.51 | 1.24 | 0 | 0 | 0 | Repressed |
| 1590 | GO_CARBOHYDRATE_PHOSPHATASE_ACTIVITY                     | -1.51 | 1.23 | 0 | 0 | 0 | Repressed |
| 1591 | XU_RESPONSE_TO_TRETINOIN_DN                              | -1.51 | 1.22 | 0 | 0 | 0 | Repressed |
| 1592 | GO_LEUCINE_BINDING                                       | -1.51 | 1.20 | 0 | 0 | 0 | Repressed |
| 1593 | GO_OLIGOPEPTIDE_BINDING                                  | -1.51 | 1.18 | 0 | 0 | 0 | Repressed |
| 1594 | REACTOME_NEF_MEDIATED_CD4_DOWN_REGULATION                | -1.51 | 1.16 | 0 | 0 | 0 | Repressed |
| 1595 | KARAKAS_TGFB1_SIGNALING                                  | -1.51 | 1.15 | 0 | 0 | 0 | Repressed |
| 1596 | GO_ANATOMICAL_STRUCTURE_HOMEOSTASIS                      | -1.50 | 4.00 | 0 | 0 | 0 | Repressed |
| 1597 | GO_CATALYTIC_COMPLEX                                     | -1.50 | 4.00 | 0 | 0 | 0 | Repressed |
| 1598 | GO_CELLULAR_RESPONSE_TO_OXIDATIVE_STRESS                 | -1.50 | 4.00 | 0 | 0 | 0 | Repressed |
| 1599 | GO_COENZYME_BINDING                                      | -1.50 | 4.00 | 0 | 0 | 0 | Repressed |
| 1600 | GO_GTPASE_ACTIVITY                                       | -1.50 | 4.00 | 0 | 0 | 0 | Repressed |
| 1601 | GO_MITOCHONDRIAL_TRANSPORT                               | -1.50 | 4.00 | 0 | 0 | 0 | Repressed |
| 1602 | GO_SUPRAMOLECULAR_COMPLEX                                | -1.50 | 4.00 | 0 | 0 | 0 | Repressed |
| 1603 | KIM_ALL_DISORDERS_OLIGODENDROCYTE_NUMBER_CORR_UP         | -1.50 | 4.00 | 0 | 0 | 0 | Repressed |
| 1604 | SPIELMAN_LYMPHOBLAST_EUROPEAN_VS_ASIAN_DN                | -1.50 | 4.00 | 0 | 0 | 0 | Repressed |
| 1605 | GO_TUMOR_NECROSIS_FACTOR_MEDIATED_SIGNALING_PATHWAY      | -1.50 | 2.49 | 0 | 0 | 0 | Repressed |
| 1606 | REACTOME_ER_TO_GOLGI_ANTEROGRADE_TRANSPORT               | -1.50 | 2.48 | 0 | 0 | 0 | Repressed |
| 1607 | PGF_UP.V1_UP                                             | -1.50 | 2.46 | 0 | 0 | 0 | Repressed |
| 1608 | GO_CELLULAR_RESPONSE_TO_XENOBIOTIC_STIMULUS              | -1.50 | 2.22 | 0 | 0 | 0 | Repressed |
| 1609 | BOYLAN_MULTIPLE_MYELOMA_C_D_UP                           | -1.50 | 2.21 | 0 | 0 | 0 | Repressed |
| 1610 | REACTOME_MITOTIC_G1_G1_S_PHASES                          | -1.50 | 2.18 | 0 | 0 | 0 | Repressed |
| 1611 | GO_U2_TYPE_SPLICEOSOMAL_COMPLEX                          | -1.50 | 1.93 | 0 | 0 | 0 | Repressed |
| 1612 | CAIRO_LIVER_DEVELOPMENT_DN                               | -1.50 | 1.90 | 0 | 0 | 0 | Repressed |
| 1613 | REACTOME_DUAL_INCISION_IN_TC_NER                         | -1.50 | 1.77 | 0 | 0 | 0 | Repressed |
| 1614 | KAYO_CALORIE_RESTRICTION_MUSCLE_UP                       | -1.50 | 1.76 | 0 | 0 | 0 | Repressed |
| 1615 | GO_LIPID_OXIDATION                                       | -1.50 | 1.71 | 0 | 0 | 0 | Repressed |
| 1616 | MUNSHI_MULTIPLE_MYELOMA_UP                               | -1.50 | 1.71 | 0 | 0 | 0 | Repressed |
| 1617 | SAKAI_CHRONIC_HEPATITIS_VS_LIVER_CANCER_UP               | -1.50 | 1.69 | 0 | 0 | 0 | Repressed |
| 1618 | REACTOME_HIV_ELONGATION_ARREST_AND_RECOVERY              | -1.50 | 1.67 | 0 | 0 | 0 | Repressed |
| 1619 | GO_PROTEIN_SUMOYLATION                                   | -1.50 | 1.66 | 0 | 0 | 0 | Repressed |
| 1620 | REACTOME_FORMATION_OF_TC_NER_PRE_INCISION_COMPLEX        | -1.50 | 1.60 | 0 | 0 | 0 | Repressed |
| 1621 | GO_NEGATIVE_REGULATION_OF_VASCULATURE_DEVELOPMENT        | -1.50 | 1.59 | 0 | 0 | 0 | Repressed |
| 1622 | GO_THIOESTER_BIOSYNTHETIC_PROCESS                        | -1.50 | 1.49 | 0 | 0 | 0 | Repressed |
| 1623 | LINDSTEDT_DENDRITIC_CELL_MATURATION_A                    | -1.50 | 1.46 | 0 | 0 | 0 | Repressed |



|      |                                                           |       |      |   |   |   |                 |
|------|-----------------------------------------------------------|-------|------|---|---|---|-----------------|
| 1624 | GO_FACE_DEVELOPMENT                                       | -1.50 | 1.45 | 0 | 0 | 0 | Repressed       |
| 1625 | GO_REGULATION_OF_GLYCOPROTEIN_METABOLIC_PROCESS           | -1.50 | 1.45 | 0 | 0 | 0 | Repressed       |
| 1626 | PLASARI_TGFB1_TARGETS_1HR_UP                              | -1.50 | 1.45 | 0 | 0 | 0 | Repressed       |
| 1627 | GO_POSITIVE_REGULATION_OF_VASCULAR_ENDOTHELIAL_GROWTH_F/  | -1.50 | 1.42 | 0 | 0 | 0 | Repressed       |
| 1628 | GO_INTRAMOLECULAR_TRANSFERASE_ACTIVITY                    | -1.50 | 1.38 | 0 | 0 | 0 | Repressed       |
| 1629 | GO_RAN_GTPASE_BINDING                                     | -1.50 | 1.37 | 0 | 0 | 0 | Repressed       |
| 1630 | WU_SILENCED_BY_METHYLATION_IN_BLADDER_CANCER              | -1.50 | 1.37 | 0 | 0 | 0 | Repressed       |
| 1631 | GO_RIBONUCLEASE_MRP_COMPLEX                               | -1.50 | 1.36 | 0 | 0 | 0 | Repressed       |
| 1632 | CHEOK_RESPONSE_TO_MERCAPTOPURINE_DN                       | -1.50 | 1.31 | 0 | 0 | 0 | Repressed       |
| 1633 | GO_POSITIVE_REGULATION_OF_MYELOID_CELL_APOPTOTIC_PROCESS  | -1.50 | 1.30 | 0 | 0 | 0 | Repressed       |
| 1634 | HALLMARK_PANCREAS_BETA_CELLS                              | -1.50 | 1.29 | 0 | 0 | 0 | Repressed       |
| 1635 | GO_POSITIVE_REGULATION_OF_ESTABLISHMENT_OF_PROTEIN_LOCALI | -1.50 | 1.28 | 0 | 0 | 0 | Repressed       |
| 1636 | ZEMBUSI_SENSITIVITY_TO_DOXORUBICIN                        | -1.50 | 1.28 | 0 | 0 | 0 | Repressed       |
| 1637 | FARMER_BREAST_CANCER_CLUSTER_7                            | -1.50 | 1.27 | 0 | 0 | 0 | Repressed       |
| 1638 | BOYVAULT_LIVER_CANCER_SUBCLASS_G12_DN                     | -1.50 | 1.26 | 0 | 0 | 0 | Repressed       |
| 1639 | GO_ACID_THIOL_LIGASE_ACTIVITY                             | -1.50 | 1.26 | 0 | 0 | 0 | Repressed       |
| 1640 | GO_REGULATION_OF_TRANSCRIPTION_BY_RNA_POLYMERASE_I        | -1.50 | 1.26 | 0 | 0 | 0 | Repressed       |
| 1641 | PID_IL12_STAT4_PATHWAY                                    | -1.50 | 1.26 | 0 | 0 | 0 | Repressed       |
| 1642 | GO_REGULATION_OF_PODOSOME_ASSEMBLY                        | -1.50 | 1.22 | 0 | 0 | 0 | Repressed       |
| 1643 | GO_RESPONSE_TO_TUMOR_CELL                                 | -1.50 | 1.22 | 0 | 0 | 0 | Repressed       |
| 1644 | GO_UBIQUITIN_RECYCLING                                    | -1.50 | 1.21 | 0 | 0 | 0 | Repressed       |
| 1645 | GO_NLRP3_INFLAMMASOME_COMPLEX_ASSEMBLY                    | -1.50 | 1.20 | 0 | 0 | 0 | Repressed       |
| 1646 | GO_POSITIVE_REGULATION_OF_CHEMOKINE_PRODUCTION            | -1.50 | 1.20 | 0 | 0 | 0 | Repressed       |
| 1647 | GO_PURINE_NUCLEOBASE_BIOSYNTHETIC_PROCESS                 | -1.50 | 1.20 | 0 | 0 | 0 | Repressed       |
| 1648 | GO_REGULATION_OF_HORMONE_BIOSYNTHETIC_PROCESS             | -1.50 | 1.17 | 0 | 0 | 0 | Repressed       |
| 1649 | GO_PROTEASOME_CORE_COMPLEX_ALPHA_SUBUNIT_COMPLEX          | -1.50 | 1.14 | 0 | 0 | 0 | Repressed       |
| 1650 | SANDERSON_PPARA_TARGETS                                   | -1.50 | 1.14 | 0 | 0 | 0 | Repressed       |
| 1651 | GO_ORGANIC_HYDROXY_COMPOUND_TRANSMEMBRANE_TRANSPORTEI     | -1.50 | 1.08 | 0 | 0 | 0 | Repressed       |
| 1652 | ACEVEDO_NORMAL_TISSUE_ADJACENT_TO_LIVER_TUMOR_DN          | -1.49 | 4.00 | 0 | 0 | 0 | not significant |
| 1653 | FARMER_BREAST_CANCER_APOCRINE_VS_LUMINAL                  | -1.49 | 4.00 | 0 | 0 | 0 | not significant |
| 1654 | GO_ACTIVATION_OF_INNATE_IMMUNE_RESPONSE                   | -1.49 | 4.00 | 0 | 0 | 0 | not significant |
| 1655 | GO_ANTIGEN_RECEPTOR_MEDIATED_SIGNALING_PATHWAY            | -1.49 | 4.00 | 0 | 0 | 0 | not significant |
| 1656 | GO_CELLULAR_AMIDE_METABOLIC_PROCESS                       | -1.49 | 4.00 | 0 | 0 | 0 | not significant |
| 1657 | GO_PROTEIN_CONTAINING_COMPLEX_BINDING                     | -1.49 | 4.00 | 0 | 0 | 0 | not significant |
| 1658 | GO_RNA_SPLICING                                           | -1.49 | 4.00 | 0 | 0 | 0 | not significant |
| 1659 | REACTOME_ADAPTIVE_IMMUNE_SYSTEM                           | -1.49 | 4.00 | 0 | 0 | 0 | not significant |
| 1660 | RUTELLA_RESPONSE_TO_HGF_VS_CSF2RB_AND_IL4_UP              | -1.49 | 4.00 | 0 | 0 | 0 | not significant |
| 1661 | GO_RESPONSE_TO_MECHANICAL_STIMULUS                        | -1.49 | 2.21 | 0 | 0 | 0 | not significant |
| 1662 | GO_RESPONSE_TO_MOLECULE_OF_BACTERIAL_ORIGIN               | -1.49 | 2.17 | 0 | 0 | 0 | not significant |
| 1663 | GO_POSITIVE_REGULATION_OF_TRANSMEMBRANE_TRANSPORT         | -1.49 | 2.03 | 0 | 0 | 0 | not significant |
| 1664 | GO_RNA_POLYMERASE_COMPLEX                                 | -1.49 | 2.01 | 0 | 0 | 0 | not significant |
| 1665 | GO_RESPONSE_TO_TYPE_I_INTERFERON                          | -1.49 | 1.94 | 0 | 0 | 0 | not significant |
| 1666 | GO_SINGLE_STRANDED_RNA_BINDING                            | -1.49 | 1.85 | 0 | 0 | 0 | not significant |
| 1667 | ROSS_AML_OF_FAB_M7_TYPE                                   | -1.49 | 1.72 | 0 | 0 | 0 | not significant |
| 1668 | GOZGIT_ESR1_TARGETS_UP                                    | -1.49 | 1.63 | 0 | 0 | 0 | not significant |
| 1669 | LANDIS_ERBB2_BREAST_PNEUOPLASTIC_DN                       | -1.49 | 1.61 | 0 | 0 | 0 | not significant |
| 1670 | NADERI_BREAST_CANCER_PROGNOSIS_UP                         | -1.49 | 1.57 | 0 | 0 | 0 | not significant |
| 1671 | GO_ION_CHANNEL_REGULATOR_ACTIVITY                         | -1.49 | 1.55 | 0 | 0 | 0 | not significant |
| 1672 | GO_MITOTIC_METAPHASE_PLATE_CONGRESSION                    | -1.49 | 1.50 | 0 | 0 | 0 | not significant |
| 1673 | GO_RUFFLE_ORGANIZATION                                    | -1.49 | 1.48 | 0 | 0 | 0 | not significant |
| 1674 | BYSTROEM_CORRELATED_WITH_IL5_UP                           | -1.49 | 1.46 | 0 | 0 | 0 | not significant |
| 1675 | CORDENONSI_YAP_CONSERVED_SIGNATURE                        | -1.49 | 1.44 | 0 | 0 | 0 | not significant |
| 1676 | KRASLUNG_UP.V1_DN                                         | -1.49 | 1.43 | 0 | 0 | 0 | not significant |
| 1677 | GO_MITOCHONDRIAL_CALCIIUM_IION_TRANSMEMBRANE_TRANSPORT    | -1.49 | 1.42 | 0 | 0 | 0 | not significant |
| 1678 | REACTOME_SIGNAL_AMPLIFICATION                             | -1.49 | 1.42 | 0 | 0 | 0 | not significant |
| 1679 | GO_REGULATION_OF_ER_TO_GOLGI_VESICLE_MEDIATED_TRANSPORT   | -1.49 | 1.41 | 0 | 0 | 0 | not significant |
| 1680 | GO_NEGATIVE_REGULATION_OF_HORMONE_SECRETION               | -1.49 | 1.40 | 0 | 0 | 0 | not significant |
| 1681 | MUELLER_COMMON_TARGETS_OF_AML_FUSIONS_DN                  | -1.49 | 1.36 | 0 | 0 | 0 | not significant |
| 1682 | GO_POSITIVE_REGULATION_OF_GLYCOPROTEIN_METABOLIC_PROCESS  | -1.49 | 1.35 | 0 | 0 | 0 | not significant |
| 1683 | GO_CHAPERONE_COMPLEX                                      | -1.49 | 1.30 | 0 | 0 | 0 | not significant |
| 1684 | GO_POSITIVE_REGULATION_OF_ANOIKIS                         | -1.49 | 1.30 | 0 | 0 | 0 | not significant |
| 1685 | REACTOME_FOXP0_MEDIATED_TRANSCRIPTION_OF_OXIDATIVE_STRESS | -1.49 | 1.28 | 0 | 0 | 0 | not significant |
| 1686 | GO_PHOSPHOLIPASE_C_ACTIVITY                               | -1.49 | 1.25 | 0 | 0 | 0 | not significant |
| 1687 | SHANK_TAL1_TARGETS_DN                                     | -1.49 | 1.22 | 0 | 0 | 0 | not significant |
| 1688 | GO_OUTER_MITOCHONDRIAL_MEMBRANE_ORGANIZATION              | -1.49 | 1.21 | 0 | 0 | 0 | not significant |
| 1689 | GO_RESPONSE_TO_LAMINAR_FLUID_SHEAR_STRESS                 | -1.49 | 1.21 | 0 | 0 | 0 | not significant |
| 1690 | GO_STRUCTURAL_MOLECULE_ACTIVITY_CONFERRING_ELASTICITY     | -1.49 | 1.21 | 0 | 0 | 0 | not significant |
| 1691 | GO_ADENYLATE_KINASE_ACTIVITY                              | -1.49 | 1.20 | 0 | 0 | 0 | not significant |
| 1692 | GO_ALDO_KETO_REDUCTASE_NADP_ACTIVITY                      | -1.49 | 1.20 | 0 | 0 | 0 | not significant |
| 1693 | REACTOME_SCAVENGING_BY_CLASS_A_RECEPTORS                  | -1.49 | 1.20 | 0 | 0 | 0 | not significant |
| 1694 | BIOCARTA_CPSF_PATHWAY                                     | -1.49 | 1.17 | 0 | 0 | 0 | not significant |
| 1695 | GO_3_PHOSPHOADENOSINE_5_PHOSPHOSULFATE_BIOSYNTHETIC_PROI  | -1.49 | 1.16 | 0 | 0 | 0 | not significant |
| 1696 | GO_POSITIVE_REGULATION_OF_SODIUM_IION_TRANSPORT           | -1.49 | 1.16 | 0 | 0 | 0 | not significant |
| 1697 | GO_REGULATION_OF_MICROVILLUS_ORGANIZATION                 | -1.49 | 1.16 | 0 | 0 | 0 | not significant |
| 1698 | GO_POSITIVE_REGULATION_OF_CHEMOKINE_BIOSYNTHETIC_PROCESS  | -1.49 | 1.15 | 0 | 0 | 0 | not significant |
| 1699 | GO_CELLULAR_RESPONSE_TO_LAMINAR_FLUID_SHEAR_STRESS        | -1.49 | 1.14 | 0 | 0 | 0 | not significant |
| 1700 | GO_PURINE_CONTAINING_COMPOUND_SALVAGE                     | -1.49 | 1.14 | 0 | 0 | 0 | not significant |
| 1701 | REACTOME_TRAFFICKING_AND_PROCESSING_OF_ENDOSOMAL_TLR      | -1.49 | 1.13 | 0 | 0 | 0 | not significant |
| 1702 | GO_PEPTIDE_CROSS_LINKING                                  | -1.49 | 1.11 | 0 | 0 | 0 | not significant |
| 1703 | BERENUENO_TRANSFORMED_BY_RHOA_FOREVER_DN                  | -1.49 | 1.06 | 0 | 0 | 0 | not significant |
| 1704 | BUYTAERT_PHOTODYNAMIC_THERAPY_STRESS_DN                   | -1.48 | 4.00 | 0 | 0 | 0 | not significant |
| 1705 | DEURIG_T_CELL_PROLYMPHOCTIC_LEUKEMIA_UP                   | -1.48 | 4.00 | 0 | 0 | 0 | not significant |
| 1706 | ENK_UV_RESPONSE_KERATINOCYTE_UP                           | -1.48 | 4.00 | 0 | 0 | 0 | not significant |
| 1707 | GO_RESPONSE_TO_TUMOR_NECROSIS_FACTOR                      | -1.48 | 4.00 | 0 | 0 | 0 | not significant |
| 1708 | GO_TRANSMEMBRANE_TRANSPORT                                | -1.48 | 4.00 | 0 | 0 | 0 | not significant |
| 1709 | JAATINEN_HEMATOPOIETIC_STEM_CELL_DN                       | -1.48 | 4.00 | 0 | 0 | 0 | not significant |
| 1710 | RUTELLA_RESPONSE_TO_HGF_UP                                | -1.48 | 4.00 | 0 | 0 | 0 | not significant |
| 1711 | CSR_LATE_UP.V1_UP                                         | -1.48 | 2.50 | 0 | 0 | 0 | not significant |
| 1712 | GO_TELOMERE_ORGANIZATION                                  | -1.48 | 2.48 | 0 | 0 | 0 | not significant |
| 1713 | GO_ACTIN_FILAMENT_BUNDLE_ORGANIZATION                     | -1.48 | 2.23 | 0 | 0 | 0 | not significant |
| 1714 | MCBRYAN_PUBERTAL_BREAST_4_5WK_DN                          | -1.48 | 2.20 | 0 | 0 | 0 | not significant |
| 1715 | GO_ORGANIC_ACID_TRANSPORT                                 | -1.48 | 2.19 | 0 | 0 | 0 | not significant |
| 1716 | GO_CARBOHYDRATE_HOMEOSTASIS                               | -1.48 | 2.17 | 0 | 0 | 0 | not significant |
| 1717 | UDAYAKUMAR_MED1_TARGETS_UP                                | -1.48 | 2.05 | 0 | 0 | 0 | not significant |
| 1718 | GO_PIGMENT_GRANULE                                        | -1.48 | 1.78 | 0 | 0 | 0 | not significant |
| 1719 | KEGG_PROGESTERONE_MEDIATED_OOCYTE_MATURATION              | -1.48 | 1.77 | 0 | 0 | 0 | not significant |
| 1720 | GO_LONG_CHAIN_FATTY_ACID_TRANSPORT                        | -1.48 | 1.64 | 0 | 0 | 0 | not significant |
| 1721 | MOHANKUMAR_HOXA1_TARGETS_DN                               | -1.48 | 1.61 | 0 | 0 | 0 | not significant |
| 1722 | GO_CELLULAR_AMINO_ACID_BIOSYNTHETIC_PROCESS               | -1.48 | 1.60 | 0 | 0 | 0 | not significant |
| 1723 | BOYVAULT_LIVER_CANCER_SUBCLASS_G1_DN                      | -1.48 | 1.55 | 0 | 0 | 0 | not significant |
| 1724 | GO_REGULATION_OF_ALCOHOL_BIOSYNTHETIC_PROCESS             | -1.48 | 1.55 | 0 | 0 | 0 | not significant |
| 1725 | GO_RESPONSE_TO_CAMP                                       | -1.48 | 1.55 | 0 | 0 | 0 | not significant |
| 1726 | KEGG_PYRUVATE_METABOLISM                                  | -1.48 | 1.54 | 0 | 0 | 0 | not significant |
| 1727 | KEGG_VALINE_LEUCINE_AND_Isoleucine_DEGRADATION            | -1.48 | 1.53 | 0 | 0 | 0 | not significant |
| 1728 | RUAN_RESPONSE_TO_TNF_DN                                   | -1.48 | 1.50 | 0 | 0 | 0 | not significant |
| 1729 | PENG_GLUCOSE_DEPRIVATION_UP                               | -1.48 | 1.43 | 0 | 0 | 0 | not significant |
| 1730 | GO_TELOMERASE_HOLOENZYME_COMPLEX                          | -1.48 | 1.29 | 0 | 0 | 0 | not significant |
| 1731 | PETRETTO_BLOOD_PRESSURE_UP                                | -1.48 | 1.27 | 0 | 0 | 0 | not significant |
| 1732 | GO_PYRIMIDINE_RIBONUCLEOSIDE_CATABOLIC_PROCESS            | -1.48 | 1.26 | 0 | 0 | 0 | not significant |

|      |                                                            |       |      |   |   |   |                 |
|------|------------------------------------------------------------|-------|------|---|---|---|-----------------|
| 1733 | PETRETTO_CARDIAC_HYPERTROPHY                               | -1.48 | 1.26 | 0 | 0 | 0 | not significant |
| 1734 | GO_CYSTEINE_TYPE_ENDOPEPTIDASE_INHIBITOR_ACTIVITY          | -1.48 | 1.25 | 0 | 0 | 0 | not significant |
| 1735 | GO_MULTICELLULAR_ORGANISM_AGING                            | -1.48 | 1.24 | 0 | 0 | 0 | not significant |
| 1736 | GO_NEGATIVE_REGULATION_OF_PROTEIN_LOCALIZATION_TO_CELL_PE  | -1.48 | 1.22 | 0 | 0 | 0 | not significant |
| 1737 | GO_SNRNA_3_END_PROCESSING                                  | -1.48 | 1.22 | 0 | 0 | 0 | not significant |
| 1738 | GO_GLUTAMINE_FAMILY_AMINO_ACID_BIOSYNTHETIC_PROCESS        | -1.48 | 1.21 | 0 | 0 | 0 | not significant |
| 1739 | MCBRYAN_TERMINAL_END_BUD_UP                                | -1.48 | 1.20 | 0 | 0 | 0 | not significant |
| 1740 | GO_HEART_FORMATION                                         | -1.48 | 1.16 | 0 | 0 | 0 | not significant |
| 1741 | GO_PROTEIN_LOCALIZATION_TO_NUCLEOLUS                       | -1.48 | 1.16 | 0 | 0 | 0 | not significant |
| 1742 | GO_T_HELPER_1_CELL_DIFFERENTIATION                         | -1.48 | 1.14 | 0 | 0 | 0 | not significant |
| 1743 | YANG_MUC2_TARGETS_DUODENUM_6MO_DN                          | -1.48 | 1.13 | 0 | 0 | 0 | not significant |
| 1744 | GO_REGULATION_OF_RECEPTOR_CATABOLIC_PROCESS                | -1.48 | 1.10 | 0 | 0 | 0 | not significant |
| 1745 | GO_POSITIVE_REGULATION_OF_T_HELPER_1_TYPE_IMMUNE_RESPONSI  | -1.48 | 1.06 | 0 | 0 | 0 | not significant |
| 1746 | GAL_LEUKEMIC_STEM_CELL_DN                                  | -1.47 | 4.00 | 0 | 0 | 0 | not significant |
| 1747 | GO_INNATE_IMMUNE_RESPONSE                                  | -1.47 | 4.00 | 0 | 0 | 0 | not significant |
| 1748 | GO_REGULATION_OF_ION_TRANSMEMBRANE_TRANSPORT               | -1.47 | 4.00 | 0 | 0 | 0 | not significant |
| 1749 | GO_REGULATION_OF_LIPID_METABOLIC_PROCESS                   | -1.47 | 4.00 | 0 | 0 | 0 | not significant |
| 1750 | GO_RESPONSE_TO_DRUG                                        | -1.47 | 4.00 | 0 | 0 | 0 | not significant |
| 1751 | MILI_PSEUDOPODIA_HAPTOTAXIS_UP                             | -1.47 | 4.00 | 0 | 0 | 0 | not significant |
| 1752 | ONDER_CDH1_TARGETS_2_DN                                    | -1.47 | 4.00 | 0 | 0 | 0 | not significant |
| 1753 | REACTOME_INNATE_IMMUNE_SYSTEM                              | -1.47 | 4.00 | 0 | 0 | 0 | not significant |
| 1754 | GO_REGULATION_OF_VASCULATURE_DEVELOPMENT                   | -1.47 | 2.44 | 0 | 0 | 0 | not significant |
| 1755 | CAMP_UP_V1_UP                                              | -1.47 | 2.43 | 0 | 0 | 0 | not significant |
| 1756 | MCLACHLAN_DENTAL_CARIES_UP                                 | -1.47 | 2.21 | 0 | 0 | 0 | not significant |
| 1757 | PID_ERBB1_DOWNSTREAM_PATHWAY                               | -1.47 | 2.02 | 0 | 0 | 0 | not significant |
| 1758 | SHEPARD_BMYB_MORPHOLINO_DN                                 | -1.47 | 2.02 | 0 | 0 | 0 | not significant |
| 1759 | REACTOME_SIGNALING_BY_NUCLEAR_RECEPTORS                    | -1.47 | 1.96 | 0 | 0 | 0 | not significant |
| 1760 | GO_PROTON_TRANSMEMBRANE_TRANSPORT                          | -1.47 | 1.89 | 0 | 0 | 0 | not significant |
| 1761 | WILCOX_RESPONSE_TO_PROGESTERONE_UP                         | -1.47 | 1.89 | 0 | 0 | 0 | not significant |
| 1762 | WOOD_EBV_EBNA1_TARGETS_UP                                  | -1.47 | 1.75 | 0 | 0 | 0 | not significant |
| 1763 | GO_MONOSACCHARIDE_BIOSYNTHETIC_PROCESS                     | -1.47 | 1.70 | 0 | 0 | 0 | not significant |
| 1764 | GO_CARBOHYDRATE_6_PHOSPHATE_1_EPIMERASE_ACTIVITY           | -1.47 | 1.57 | 0 | 0 | 0 | not significant |
| 1765 | VANTVEER_BREAST_CANCER_BRCA1_UP                            | -1.47 | 1.57 | 0 | 0 | 0 | not significant |
| 1766 | GO_NUCLEAR_ENVELOPE_ORGANIZATION                           | -1.47 | 1.55 | 0 | 0 | 0 | not significant |
| 1767 | ZHOU_TNF_SIGNALING_30MIN                                   | -1.47 | 1.55 | 0 | 0 | 0 | not significant |
| 1768 | ZHAN_MULTIPLE_MYELOMA_CD1_UP                               | -1.47 | 1.49 | 0 | 0 | 0 | not significant |
| 1769 | GRAESSMANN_RESPONSE_TO_MC_AND_SERUM_DEPRIVATION_DN         | -1.47 | 1.46 | 0 | 0 | 0 | not significant |
| 1770 | REACTOME_FATTY_ACYL_COA_BIOSYNTHESIS                       | -1.47 | 1.46 | 0 | 0 | 0 | not significant |
| 1771 | REACTOME_RMTS_METHYLATE_HISTONE_ARGININES                  | -1.47 | 1.46 | 0 | 0 | 0 | not significant |
| 1772 | GO_ENDONUCLEASE_COMPLEX                                    | -1.47 | 1.38 | 0 | 0 | 0 | not significant |
| 1773 | GO_REGULATORY_RNA_BINDING                                  | -1.47 | 1.36 | 0 | 0 | 0 | not significant |
| 1774 | GO_CHANNEL_INHIBITOR_ACTIVITY                              | -1.47 | 1.35 | 0 | 0 | 0 | not significant |
| 1775 | LEE_LIVER_CANCER_MYC_E2F1_UP                               | -1.47 | 1.35 | 0 | 0 | 0 | not significant |
| 1776 | GO_UNSATURATED_FATTY_ACID_BIOSYNTHETIC_PROCESS             | -1.47 | 1.33 | 0 | 0 | 0 | not significant |
| 1777 | LY_AGING_PREMATURE_DN                                      | -1.47 | 1.32 | 0 | 0 | 0 | not significant |
| 1778 | GO_RESPONSE_TO_DSRNA                                       | -1.47 | 1.29 | 0 | 0 | 0 | not significant |
| 1779 | GO_TRNA_SPECIFIC_RIBONUCLEASE_ACTIVITY                     | -1.47 | 1.29 | 0 | 0 | 0 | not significant |
| 1780 | GO_RNA_POLYMERASE_II_CORE_COMPLEX                          | -1.47 | 1.25 | 0 | 0 | 0 | not significant |
| 1781 | GO_CELLULAR_RESPONSE_TO_GONADOTROPIN_STIMULUS              | -1.47 | 1.24 | 0 | 0 | 0 | not significant |
| 1782 | GO_RESPONSE_TO_IRON_III_ION                                | -1.47 | 1.24 | 0 | 0 | 0 | not significant |
| 1783 | GO_FIBRINOLYSIS                                            | -1.47 | 1.23 | 0 | 0 | 0 | not significant |
| 1784 | GO_LEUCINE_CATABOLIC_PROCESS                               | -1.47 | 1.23 | 0 | 0 | 0 | not significant |
| 1785 | LIANG_SILENCED_BY_METHYLATION_UP                           | -1.47 | 1.23 | 0 | 0 | 0 | not significant |
| 1786 | GO_ACTIN_CROSSLINK_FORMATION                               | -1.47 | 1.20 | 0 | 0 | 0 | not significant |
| 1787 | GO_ADENOSINE_RECEPTOR_SIGNALING_PATHWAY                    | -1.47 | 1.20 | 0 | 0 | 0 | not significant |
| 1788 | GO_ADENYLATE_CYCLASE_ACTIVATOR_ACTIVITY                    | -1.47 | 1.20 | 0 | 0 | 0 | not significant |
| 1789 | GO_LONG_CHAIN_FATTY_ACID_TRANSPORTER_ACTIVITY              | -1.47 | 1.20 | 0 | 0 | 0 | not significant |
| 1790 | GO_SINGLE_STRANDED_VIRAL_RNA_REPLICATION_VIA_DOUBLE_STRAN  | -1.47 | 1.20 | 0 | 0 | 0 | not significant |
| 1791 | BIOCARTA_NUCLEAR_RNA_PATHWAY                               | -1.47 | 1.17 | 0 | 0 | 0 | not significant |
| 1792 | GO_GLYCINE_TRANSPORT                                       | -1.47 | 1.16 | 0 | 0 | 0 | not significant |
| 1793 | GO_POSITIVE_REGULATION_OF_AMYLOID_PRECURSOR_PROTEIN_CATA   | -1.47 | 1.16 | 0 | 0 | 0 | not significant |
| 1794 | SCHAEFFER_SOX9_TARGETS_IN_PROSTATE_DEVELOPMENT_UP          | -1.47 | 1.16 | 0 | 0 | 0 | not significant |
| 1795 | REACTOME_TRNA_PROCESSING_IN_THE_MITOCHONDRION              | -1.47 | 1.14 | 0 | 0 | 0 | not significant |
| 1796 | GO_POSITIVE_REGULATION_OF_TUMOR_NECROSIS_FACTOR_BIOSYNT    | -1.47 | 1.13 | 0 | 0 | 0 | not significant |
| 1797 | GO_REGULATION_OF_ASTROCYTE_DIFFERENTIATION                 | -1.47 | 1.13 | 0 | 0 | 0 | not significant |
| 1798 | ZHAN_V1_LATE_DIFFERENTIATION_GENES_DN                      | -1.47 | 1.13 | 0 | 0 | 0 | not significant |
| 1799 | GO_FOREBRAIN_NEURON_DEVELOPMENT                            | -1.47 | 1.11 | 0 | 0 | 0 | not significant |
| 1800 | ZERBINI_RESPONSE_TO_SULINDAC_DN                            | -1.47 | 1.11 | 0 | 0 | 0 | not significant |
| 1801 | GO_PINOSOME                                                | -1.47 | 1.08 | 0 | 0 | 0 | not significant |
| 1802 | GO_POSITIVE_REGULATION_OF_DNA_TEMPLATED_TRANSCRIPTION_INIT | -1.47 | 1.08 | 0 | 0 | 0 | not significant |
| 1803 | YANG_MUC2_TARGETS_DUODENUM_3MO_DN                          | -1.47 | 1.08 | 0 | 0 | 0 | not significant |
| 1804 | GO_RENAL_ABSORPTION                                        | -1.47 | 1.07 | 0 | 0 | 0 | not significant |
| 1805 | GO_MAINTENANCE_OF_GASTROINTESTINAL_EPITHELIUM              | -1.47 | 1.06 | 0 | 0 | 0 | not significant |
| 1806 | GO_ACTIN_CYTOSKELETON                                      | -1.46 | 4.00 | 0 | 0 | 0 | not significant |
| 1807 | GO_CELLULAR_PROTEIN_CONTAINING_COMPLEX_ASSEMBLY            | -1.46 | 4.00 | 0 | 0 | 0 | not significant |
| 1808 | GO_REGULATION_OF_SYSTEM_PROCESS                            | -1.46 | 4.00 | 0 | 0 | 0 | not significant |
| 1809 | GO_RESPONSE_TO ABIOTIC_STIMULUS                            | -1.46 | 4.00 | 0 | 0 | 0 | not significant |
| 1810 | REACTOME_TRANSLATION                                       | -1.46 | 4.00 | 0 | 0 | 0 | not significant |
| 1811 | MEK_UP_V1_DN                                               | -1.46 | 2.43 | 0 | 0 | 0 | not significant |
| 1812 | KIM_WT1_TARGETS_DN                                         | -1.46 | 2.25 | 0 | 0 | 0 | not significant |
| 1813 | GO_CYTOSOLIC_CALCIIUM_ION_TRANSPORT                        | -1.46 | 2.24 | 0 | 0 | 0 | not significant |
| 1814 | RAMALHO_STEMNESS_UP                                        | -1.46 | 2.10 | 0 | 0 | 0 | not significant |
| 1815 | REACTOME_METABOLISM_OF_STEROIDS                            | -1.46 | 2.02 | 0 | 0 | 0 | not significant |
| 1816 | EPPERT_PROGENITOR                                          | -1.46 | 2.00 | 0 | 0 | 0 | not significant |
| 1817 | REACTOME_AURKA_ACTIVATION_BY_TPX2                          | -1.46 | 1.94 | 0 | 0 | 0 | not significant |
| 1818 | MACAIEVA_PBMG_RESPONSE_TO_IR                               | -1.46 | 1.84 | 0 | 0 | 0 | not significant |
| 1819 | REACTOME_CARDIAC_CONDUCTION                                | -1.46 | 1.75 | 0 | 0 | 0 | not significant |
| 1820 | GO_I_BAND                                                  | -1.46 | 1.74 | 0 | 0 | 0 | not significant |
| 1821 | REACTOME_INTERLEUKIN_12_FAMILY_SIGNALING                   | -1.46 | 1.73 | 0 | 0 | 0 | not significant |
| 1822 | GO_REGULATION_OF_OXIDOREDUCTASE_ACTIVITY                   | -1.46 | 1.68 | 0 | 0 | 0 | not significant |
| 1823 | ADDYA_ERYTHROID_DIFFERENTIATION_BY_HEMIN                   | -1.46 | 1.63 | 0 | 0 | 0 | not significant |
| 1824 | REACTOME_TRANSCRIPTIONAL_ACTIVATION_OF_MITOCHONDRIAL_BIOC  | -1.46 | 1.63 | 0 | 0 | 0 | not significant |
| 1825 | BROWNE_HCMV_INFECTION_20HR_DN                              | -1.46 | 1.60 | 0 | 0 | 0 | not significant |
| 1826 | GO_MUSCLE_CELL_DEVELOPMENT                                 | -1.46 | 1.57 | 0 | 0 | 0 | not significant |
| 1827 | GO_ORGANIC_ACID_TRANSMEMBRANE_TRANSPORT                    | -1.46 | 1.57 | 0 | 0 | 0 | not significant |
| 1828 | GO_RESPONSE_TO_FATTY_ACID                                  | -1.46 | 1.53 | 0 | 0 | 0 | not significant |
| 1829 | HOFFMANN_PRE_BI_TO_LARGE_PRE_BII_LYMPHOCYTE_DN             | -1.46 | 1.48 | 0 | 0 | 0 | not significant |
| 1830 | GO_CELLULAR_RESPONSE_TO_MECHANICAL_STIMULUS                | -1.46 | 1.44 | 0 | 0 | 0 | not significant |
| 1831 | NAKAMURA_METASTASIS_MODEL_UP                               | -1.46 | 1.44 | 0 | 0 | 0 | not significant |
| 1832 | REACTOME_MITOCHONDRIAL_FATTY_ACID_BETA_OXIDATION           | -1.46 | 1.41 | 0 | 0 | 0 | not significant |
| 1833 | PID_BCR_PATHWAY                                            | -1.46 | 1.40 | 0 | 0 | 0 | not significant |
| 1834 | REACTOME_GPMI_MEDIATED_ACTIVATION_CASCADE                  | -1.46 | 1.33 | 0 | 0 | 0 | not significant |
| 1835 | GRAHAM_NORMAL_QUIESCENT_VS_NORMAL_DIVIDING_UP              | -1.46 | 1.31 | 0 | 0 | 0 | not significant |
| 1836 | GO_CIS_TRANS_ISOMERASE_ACTIVITY                            | -1.46 | 1.30 | 0 | 0 | 0 | not significant |
| 1837 | KEGG_CYSSTEINE_AND_METHIONINE_METABOLISM                   | -1.46 | 1.30 | 1 | 0 | 0 | Repressed       |
| 1838 | GENTILE_UV_RESPONSE_CLUSTER_D5                             | -1.46 | 1.29 | 0 | 0 | 0 | not significant |
| 1839 | GO_SODIUM_POTASSIUM_EXCHANGING_ATPASE_COMPLEX              | -1.46 | 1.29 | 0 | 0 | 0 | not significant |
| 1840 | AMIT_EGF_RESPONSE_60_HELA                                  | -1.46 | 1.27 | 0 | 0 | 0 | not significant |
| 1841 | GO_SMALL_NUCLEOLAR_RIBONUCLEOPROTEIN_COMPLEX_ASSEMBLY      | -1.46 | 1.22 | 0 | 0 | 0 | not significant |

|      |                                                            |       |      |   |   |   |                 |
|------|------------------------------------------------------------|-------|------|---|---|---|-----------------|
| 1842 | REACTOME_PKA_ACTIVATION_IN_GLUCAGON_SIGNALLING             | -1.46 | 1.21 | 0 | 0 | 0 | not significant |
| 1843 | GO_POSITIVE_REGULATION_OF_ASTROCYTE_DIFFERENTIATION        | -1.46 | 1.19 | 0 | 0 | 0 | not significant |
| 1844 | GO_EXON_EXON_JUNCTION_COMPLEX                              | -1.46 | 1.18 | 0 | 0 | 0 | not significant |
| 1845 | GO_QUINONE_BIOSYNTHETIC_PROCESS                            | -1.46 | 1.18 | 0 | 0 | 0 | not significant |
| 1846 | MARCHINI TRABECTEDIN_RESISTANCE_UP                         | -1.46 | 1.18 | 0 | 0 | 0 | not significant |
| 1847 | STAMBOLSKY_BOUND_BY_MUTATED_TP53                           | -1.46 | 1.18 | 0 | 0 | 0 | not significant |
| 1848 | GO_FATTY_ACYL_COA_BIOSYNTHETIC_PROCESS                     | -1.46 | 1.17 | 0 | 0 | 0 | not significant |
| 1849 | GO_PWP2P_CONTAINING_SUBCOMPLEX_OF_90S_PRERIBOSOME          | -1.46 | 1.16 | 0 | 0 | 0 | not significant |
| 1850 | GO_DENDRITIC_TRANSPORT                                     | -1.46 | 1.15 | 0 | 0 | 0 | not significant |
| 1851 | KOBAYASHI_EGFR_SIGNALING_6HR_DN                            | -1.46 | 1.15 | 0 | 0 | 0 | not significant |
| 1852 | REACTOME_G2_M_DNA_REPLICATION_CHECKPOINT                   | -1.46 | 1.15 | 0 | 0 | 0 | not significant |
| 1853 | GO_CHAPERONE_MEDIATED_PROTEIN_COMPLEX_ASSEMBLY             | -1.46 | 1.14 | 0 | 0 | 0 | not significant |
| 1854 | GO_ENDONUCLEOLYTIC_CLEAVAGE_IN_5_ETS_OF_TRICISTRONIC_RRMV  | -1.46 | 1.14 | 0 | 0 | 0 | not significant |
| 1855 | GO_NEGATIVE_REGULATION_OF_CENTROSOME_CYCLE                 | -1.46 | 1.14 | 0 | 0 | 0 | not significant |
| 1856 | GO_POSITIVE_REGULATION_OF_NAD_P_H_OXIDASE_ACTIVITY         | -1.46 | 1.13 | 0 | 0 | 0 | not significant |
| 1857 | SARTPY_BLUNTED_BY_INSULIN_RESISTANCE_UP                    | -1.46 | 1.13 | 0 | 0 | 0 | not significant |
| 1858 | GO_AMINOACYL_TRNA_EDITING_ACTIVITY                         | -1.46 | 1.12 | 0 | 0 | 0 | not significant |
| 1859 | GO_POSITIVE_REGULATION_OF_MUSCLE_HYPERTROPHY               | -1.46 | 1.12 | 0 | 0 | 0 | not significant |
| 1860 | GO_AMINOACYL_TRNA_METABOLISM_INVOLVED_IN_TRANSLATIONAL_FII | -1.46 | 1.11 | 0 | 0 | 0 | not significant |
| 1861 | GO_NUCLEAR_EXPORT_SIGNAL_RECEPTOR_ACTIVITY                 | -1.46 | 1.11 | 0 | 0 | 0 | not significant |
| 1862 | GO_NEGATIVE_REGULATION_OF_MULTICELLULAR_ORGANISM_GROWTH    | -1.46 | 1.10 | 0 | 0 | 0 | not significant |
| 1863 | HERNANDEZ_MITOTIC_ARREST_BY_DOCETAXEL_1_UP                 | -1.46 | 1.08 | 0 | 0 | 0 | not significant |
| 1864 | HOWLIN_CITED1_TARGETS_2_DN                                 | -1.46 | 1.08 | 0 | 0 | 0 | not significant |
| 1865 | STEGEER_ADIPOGENESIS_UP                                    | -1.46 | 1.08 | 0 | 0 | 0 | not significant |
| 1866 | GO_OXIDOREDUCTASE_ACTIVITY_ACTING_ON_DIPHENOLS_AND_RELATI  | -1.46 | 1.05 | 0 | 0 | 0 | not significant |
| 1867 | DANG_BOUND_BY_MYC                                          | -1.45 | 4.00 | 0 | 0 | 0 | not significant |
| 1868 | GO_REGULATION_OF_TRANSMEMBRANE_TRANSPORT                   | -1.45 | 4.00 | 0 | 0 | 0 | not significant |
| 1869 | KYNG_WERNER_SYNDROM_AND_NORMAL_AGING_DN                    | -1.45 | 4.00 | 0 | 0 | 0 | not significant |
| 1870 | LOPEZ_MBD_TARGETS                                          | -1.45 | 4.00 | 0 | 0 | 0 | not significant |
| 1871 | SPIELMAN_LYMPHOBLAST_EUROPEAN_VS_ASIAN_UP                  | -1.45 | 4.00 | 0 | 0 | 0 | not significant |
| 1872 | GO_SPLICEOSOMAL_COMPLEX                                    | -1.45 | 2.40 | 0 | 0 | 0 | not significant |
| 1873 | GO_MUSCLE_SYSTEM_PROCESS                                   | -1.45 | 2.16 | 0 | 0 | 0 | not significant |
| 1874 | GOLDRATH_HOMEOSTATIC_PROLIFERATION                         | -1.45 | 1.99 | 0 | 0 | 0 | not significant |
| 1875 | PROVENZANI_METASTASIS_DN                                   | -1.45 | 1.97 | 0 | 0 | 0 | not significant |
| 1876 | GO_MICROBODY_PART                                          | -1.45 | 1.96 | 0 | 0 | 0 | not significant |
| 1877 | MISSIAGLIA_REGULATED_BY_METHYLATION_DN                     | -1.45 | 1.75 | 0 | 0 | 0 | not significant |
| 1878 | CAFFAREL_RESPONSE_TO_THC_24HR_5_DN                         | -1.45 | 1.63 | 0 | 0 | 0 | not significant |
| 1879 | FOSTER_TOLERANT_MACROPHAGE_UP                              | -1.45 | 1.62 | 0 | 0 | 0 | not significant |
| 1880 | JAIN_NFKB_SIGNALING                                        | -1.45 | 1.62 | 0 | 0 | 0 | not significant |
| 1881 | REACTOME_RNA_POLYMERASE_I_PROMOTER_ESCAPE                  | -1.45 | 1.61 | 0 | 0 | 0 | not significant |
| 1882 | GO_POSITIVE_REGULATION_OF_CALCIIUM_ION_TRANSPORT           | -1.45 | 1.60 | 0 | 0 | 0 | not significant |
| 1883 | REACTOME_POSITIVE_EPIGENETIC_REGULATION_OF_RNA_EXPRESSION  | -1.45 | 1.60 | 0 | 0 | 0 | not significant |
| 1884 | REACTOME_FORMATION_OF_THE_BETA_CATENIN/TCF_TRANSACTIVATI   | -1.45 | 1.57 | 0 | 0 | 0 | not significant |
| 1885 | REACTOME_INTERFERON_ALPHA_BETA_SIGNALING                   | -1.45 | 1.57 | 0 | 0 | 0 | not significant |
| 1886 | GO_NAD_BINDING                                             | -1.45 | 1.53 | 0 | 0 | 0 | not significant |
| 1887 | FAELT_B_CLL_WITH_VH3_21_UP                                 | -1.45 | 1.46 | 0 | 0 | 0 | not significant |
| 1888 | ABRAMSON_INTERACT_WITH_AIRE                                | -1.45 | 1.44 | 0 | 0 | 0 | not significant |
| 1889 | GO_PROTEIN_K11_LINKED_UBIQUITINATION                       | -1.45 | 1.39 | 0 | 0 | 0 | not significant |
| 1890 | NAKAMURA_METASTASIS                                        | -1.45 | 1.38 | 0 | 0 | 0 | not significant |
| 1891 | SENGUPTA_NASOPHARYNGEAL_CARCINOMA_WITH_LMP1_DN             | -1.45 | 1.38 | 0 | 0 | 0 | not significant |
| 1892 | GO_MACROMOLECULE_TRANSMEMBRANE_TRANSPORTER_ACTIVITY        | -1.45 | 1.36 | 0 | 0 | 0 | not significant |
| 1893 | GO_ESTABLISHMENT_OF_SPINDLE_ORIENTATION                    | -1.45 | 1.35 | 0 | 0 | 0 | not significant |
| 1894 | JIANG_AGING_HYPOTHALAMUS_UP                                | -1.45 | 1.35 | 0 | 0 | 0 | not significant |
| 1895 | REACTOME_NUCLEAR_RECEPTOR_TRANSCRIPTION_PATHWAY            | -1.45 | 1.31 | 0 | 0 | 0 | not significant |
| 1896 | ROY_WOUND_BLOOD_VESSEL_UP                                  | -1.45 | 1.27 | 0 | 0 | 0 | not significant |
| 1897 | GO_FAD_BINDING                                             | -1.45 | 1.26 | 0 | 0 | 0 | not significant |
| 1898 | REACTOME_MET_PROMOTES_CELL_MOTILITY                        | -1.45 | 1.26 | 0 | 0 | 0 | not significant |
| 1899 | ZHAN_VARIABLE_EARLY_DIFFERENTIATION_GENES_DN               | -1.45 | 1.26 | 0 | 0 | 0 | not significant |
| 1900 | GO_PROTEIN_SERINE_THREONINE_KINASE_ACTIVATOR_ACTIVITY      | -1.45 | 1.25 | 0 | 0 | 0 | not significant |
| 1901 | GNATENKO_PLATELET_SIGNATURE                                | -1.45 | 1.24 | 0 | 0 | 0 | not significant |
| 1902 | GO_ANTIBACTERIAL_HUMORAL_RESPONSE                          | -1.45 | 1.22 | 0 | 0 | 0 | not significant |
| 1903 | GO_POSITIVE_REGULATION_OF_TRANSLATIONAL_INITIATION         | -1.45 | 1.22 | 0 | 0 | 0 | not significant |
| 1904 | GO_PYRIDINE_CONTAINING_COMPOUND_METABOLIC_PROCESS          | -1.45 | 1.22 | 0 | 0 | 0 | not significant |
| 1905 | GO_SULFURTRANSFERASE_ACTIVITY                              | -1.45 | 1.17 | 0 | 0 | 0 | not significant |
| 1906 | GO_CRISTAE_FORMATION                                       | -1.45 | 1.16 | 0 | 0 | 0 | not significant |
| 1907 | GO_PROTEIN_LOCALIZATION_TO_NUCLEOPLASM                     | -1.45 | 1.16 | 0 | 0 | 0 | not significant |
| 1908 | GO_RNA_POLYMERASE_I_ACTIVITY                               | -1.45 | 1.15 | 0 | 0 | 0 | not significant |
| 1909 | COLLIS_PRKDC_REGULATORS                                    | -1.45 | 1.14 | 0 | 0 | 0 | not significant |
| 1910 | GO_POSITIVE_REGULATION_OF_LAMELLOPODIUM_MORPHOGENESIS      | -1.45 | 1.12 | 0 | 0 | 0 | not significant |
| 1911 | ZHANG_GATA6_TARGETS_UP                                     | -1.45 | 1.12 | 0 | 0 | 0 | not significant |
| 1912 | BIOCARTA_MTA3_PATHWAY                                      | -1.45 | 1.11 | 0 | 0 | 0 | not significant |
| 1913 | GO_CELLULAR_LIPID_BIOSYNTHETIC_PROCESS                     | -1.45 | 1.10 | 0 | 0 | 0 | not significant |
| 1914 | GO_PURINE_NUCLEOTIDE_SALVAGE                               | -1.45 | 1.10 | 0 | 0 | 0 | not significant |
| 1915 | KEGG_FOLATE_BIOSYNTHESIS                                   | -1.45 | 1.10 | 0 | 0 | 0 | not significant |
| 1916 | LEE_METASTASIS_AND_RNA_PROCESSING_UP                       | -1.45 | 1.10 | 0 | 0 | 0 | not significant |
| 1917 | WU_HBX_TARGETS_3_DN                                        | -1.45 | 1.10 | 0 | 0 | 0 | not significant |
| 1918 | GO_INFLAMMATORY_RESPONSE_TO_WOUNDING                       | -1.45 | 1.08 | 0 | 0 | 0 | not significant |
| 1919 | CROSBY_E2F4_TARGETS                                        | -1.45 | 1.07 | 0 | 0 | 0 | not significant |
| 1920 | KRAS_50_UP_V1_UP                                           | -1.45 | 1.07 | 0 | 0 | 0 | not significant |
| 1921 | BIOCARTA_MEF2D_PATHWAY                                     | -1.45 | 1.06 | 0 | 0 | 0 | not significant |
| 1922 | GO_PYRAMIDAL_NEURON_DIFFERENTIATION                        | -1.45 | 1.06 | 0 | 0 | 0 | not significant |
| 1923 | GO_RESPONSE_TO_GONADOTROPIN                                | -1.45 | 1.06 | 0 | 0 | 0 | not significant |
| 1924 | GO_RETROGRADE_AXONAL_TRANSPORT                             | -1.45 | 1.06 | 0 | 0 | 0 | not significant |
| 1925 | REACTOME_POLO_LIKE_KINASE_MEDIATED_EVENTS                  | -1.45 | 1.05 | 0 | 0 | 0 | not significant |
| 1926 | GO_LEUKOCYTE_ACTIVATION_INVOLVED_IN_INFLAMMATORY_RESPONSI  | -1.45 | 1.04 | 0 | 0 | 0 | not significant |
| 1927 | GO_PEPTIDYL_ARGININE_METHYLATION_TO_ASYMMETRICAL_DIMETHYL  | -1.45 | 1.04 | 0 | 0 | 0 | not significant |
| 1928 | GO_EPITHELIAL_TUBE_BRANCHING_INVOLVED_IN_LUNG_MORPHOGENES  | -1.45 | 1.03 | 0 | 0 | 0 | not significant |
| 1929 | REACTOME_BINDING_OF_TCF_LEF/CTNNB1_TO_TARGET_GENE_PROMC    | -1.45 | 1.03 | 0 | 0 | 0 | not significant |
| 1930 | GO_REGULATION_OF_VITAMIN_METABOLIC_PROCESS                 | -1.45 | 1.03 | 0 | 0 | 0 | not significant |
| 1931 | YAMANAKA_GLIOMASTOMA_SURVIVAL_UP                           | -1.45 | 1.01 | 0 | 0 | 0 | not significant |
| 1932 | GO_HEART TRABECULA FORMATION                               | -1.45 | 0.99 | 0 | 0 | 0 | not significant |
| 1933 | GO_HEPARAN_SULFATE_PROTEOGLYCAN_BINDING                    | -1.45 | 0.99 | 0 | 0 | 0 | not significant |
| 1934 | GO_POSITIVE_REGULATION_OF_CELLULAR_RESPIRATION             | -1.45 | 0.98 | 0 | 0 | 0 | not significant |
| 1935 | GO_NEGATIVE_REGULATION_OF_DIGESTIVE_SYSTEM_PROCESS         | -1.45 | 0.96 | 0 | 0 | 0 | not significant |
| 1936 | COLINA_TARGETS_OF_4EBP1_AND_4EBP2                          | -1.44 | 4.00 | 0 | 0 | 0 | not significant |
| 1937 | GO_AMIDE_BIOSYNTHETIC_PROCESS                              | -1.44 | 4.00 | 0 | 0 | 0 | not significant |
| 1938 | GO_HYDROLASE_ACTIVITY_ACTING_ON_ACID_ANHYDRIDES            | -1.44 | 4.00 | 0 | 0 | 0 | not significant |
| 1939 | REACTOME_PTEIN_REGULATION                                  | -1.44 | 4.00 | 0 | 0 | 0 | not significant |
| 1940 | KONG_E2F3_TARGETS                                          | -1.44 | 2.52 | 0 | 0 | 0 | not significant |
| 1941 | GO_ENZYME_INHIBITOR_ACTIVITY                               | -1.44 | 2.44 | 0 | 0 | 0 | not significant |
| 1942 | IVANOVA_HEMATOPOIESIS_LATE_PROGENITOR                      | -1.44 | 2.31 | 0 | 0 | 0 | not significant |
| 1943 | GO_RESPONSE_TO_CARBOHYDRATE                                | -1.44 | 2.19 | 0 | 0 | 0 | not significant |
| 1944 | GO_FATTY_ACID_CATABOLIC_PROCESS                            | -1.44 | 2.07 | 0 | 0 | 0 | not significant |
| 1945 | GO_RESPONSE_TO_XENOBIOTIC_STIMULUS                         | -1.44 | 2.02 | 0 | 0 | 0 | not significant |
| 1946 | BROWNE_HCMV_INFECTION_14HR_UP                              | -1.44 | 1.99 | 0 | 0 | 0 | not significant |
| 1947 | GO_NUCLEUS_ORGANIZATION                                    | -1.44 | 1.90 | 0 | 0 | 0 | not significant |
| 1948 | REACTOME_METABOLISM_OF_VITAMINS_AND_COFACTORS              | -1.44 | 1.88 | 0 | 0 | 0 | not significant |
| 1949 | ACEVEDO_NORMAL_TISSUE_ADJACENT_TO_LIVER_TUMOR_UP           | -1.44 | 1.80 | 0 | 0 | 0 | not significant |
| 1950 | GO_CALCIIUM_MEDIATED_SIGNALING                             | -1.44 | 1.80 | 0 | 0 | 0 | not significant |

|      |                                                            |       |      |   |   |   |                 |
|------|------------------------------------------------------------|-------|------|---|---|---|-----------------|
| 1951 | GO_NEPHRON_DEVELOPMENT                                     | -1.44 | 1.57 | 0 | 0 | 0 | not significant |
| 1952 | MORI_MATURE_B_LYMPHOCYTE_DN                                | -1.44 | 1.56 | 0 | 0 | 0 | not significant |
| 1953 | CRX_DN.V1_UP                                               | -1.44 | 1.55 | 0 | 0 | 0 | not significant |
| 1954 | CHR1P32                                                    | -1.44 | 1.46 | 0 | 0 | 0 | not significant |
| 1955 | GO_HORMONE_BINDING                                         | -1.44 | 1.44 | 0 | 0 | 0 | not significant |
| 1956 | GO_POSITIVE_REGULATION_OF_VIRAL_TRANSCRIPTION              | -1.44 | 1.41 | 0 | 0 | 0 | not significant |
| 1957 | GO_REGULATION_OF_PROTEIN_DEPOLYMERIZATION                  | -1.44 | 1.39 | 0 | 0 | 0 | not significant |
| 1958 | PID_FOXM1_PATHWAY                                          | -1.44 | 1.39 | 0 | 0 | 0 | not significant |
| 1959 | KEGG_PATHOGENIC_ESCHERICHIA_COLI_INFECTION                 | -1.44 | 1.33 | 0 | 0 | 0 | not significant |
| 1960 | BOYAUIT_LIVER_CANCER_SUBCLASS_G123_DN                      | -1.44 | 1.32 | 0 | 0 | 0 | not significant |
| 1961 | KLEIN_PRIMARY_EFFUSION_LYMPHOMA_UP                         | -1.44 | 1.32 | 0 | 0 | 0 | not significant |
| 1962 | CUI_GLUCOSE_DEPRIVATION                                    | -1.44 | 1.31 | 0 | 0 | 0 | not significant |
| 1963 | GO_REGULATION_OF_SISTER_CHROMATID_COHESION                 | -1.44 | 1.24 | 0 | 0 | 0 | not significant |
| 1964 | GO_TERMINATION_OF_RNA_POLYMERASE_I_TRANSCRIPTION           | -1.44 | 1.24 | 0 | 0 | 0 | not significant |
| 1965 | GO_NEUROMUSCULAR_SYNAPTIC_TRANSMISSION                     | -1.44 | 1.22 | 0 | 0 | 0 | not significant |
| 1966 | GO_CELLULAR_RESPONSE_TO_CAMP                               | -1.44 | 1.21 | 0 | 0 | 0 | not significant |
| 1967 | GO_MATURATION_OF_LSU_RRNA                                  | -1.44 | 1.21 | 0 | 0 | 0 | not significant |
| 1968 | KEGG_GLYCINE_SERINE_AND_THREONINE_METABOLISM               | -1.44 | 1.21 | 0 | 0 | 0 | not significant |
| 1969 | GO_ATP_DEPENDENT_MICROTUBULE_MOTOR_ACTIVITY_PLUS_END_DIR   | -1.44 | 1.19 | 0 | 0 | 0 | not significant |
| 1970 | GO_GLANDULAR_EPITHELIAL_CELL_DIFFERENTIATION               | -1.44 | 1.19 | 0 | 0 | 0 | not significant |
| 1971 | CROMER_TUMORIGENESIS_UP                                    | -1.44 | 1.18 | 0 | 0 | 0 | not significant |
| 1972 | GO_ANAPHASE_PROMOTING_COMPLEX                              | -1.44 | 1.18 | 0 | 0 | 0 | not significant |
| 1973 | HAHTOLA_MYCOSIS_FUNGOIDES_SKIN_DN                          | -1.44 | 1.18 | 0 | 0 | 0 | not significant |
| 1974 | GO_MONOCARBOXYLIC_ACID_BINDING                             | -1.44 | 1.17 | 0 | 0 | 0 | not significant |
| 1975 | GO_KETONE_BIOSYNTHETIC_PROCESS                             | -1.44 | 1.16 | 0 | 0 | 0 | not significant |
| 1976 | KEGG_PORPHYRIN_AND_CHLOROPHYLL_METABOLISM                  | -1.44 | 1.15 | 0 | 0 | 0 | not significant |
| 1977 | REACTOME_CHOLESTEROL_BIOSYNTHESIS                          | -1.44 | 1.15 | 0 | 0 | 0 | not significant |
| 1978 | GO_REGULATION_OF_LYASE_ACTIVITY                            | -1.44 | 1.14 | 0 | 0 | 0 | not significant |
| 1979 | GO_REGULATION_OF_SYSTEMIC_ARTERIAL_BLOOD_PRESSURE_BY_HO    | -1.44 | 1.14 | 0 | 0 | 0 | not significant |
| 1980 | GO_NEGATIVE_REGULATION_OF_MACROPHAGE_DERIVED_FOAM_CELL     | -1.44 | 1.12 | 0 | 0 | 0 | not significant |
| 1981 | GO_POSITIVE_REGULATION_OF_NOTCH_SIGNALING_PATHWAY          | -1.44 | 1.12 | 0 | 0 | 0 | not significant |
| 1982 | WANG_RESPONSE_TO_FORSKOLIN_UP                              | -1.44 | 1.12 | 0 | 0 | 0 | not significant |
| 1983 | GO_REGULATION_OF_VOLTAGE_GATED_CALCIIUM_CHANNEL_ACTIVITY   | -1.44 | 1.11 | 0 | 0 | 0 | not significant |
| 1984 | GO_CARDIAC_MUSCLE_CELL_MEMBRANE_REPOLARIZATION             | -1.44 | 1.08 | 0 | 0 | 0 | not significant |
| 1985 | GO_CRANIAL_NERVE_MORPHOGENESIS                             | -1.44 | 1.08 | 0 | 0 | 0 | not significant |
| 1986 | GO_INNATE_IMMUNE_RESPONSE_IN_MUCOSA                        | -1.44 | 1.08 | 0 | 0 | 0 | not significant |
| 1987 | MURAKAMI_UV_RESPONSE_24HR                                  | -1.44 | 1.07 | 0 | 0 | 0 | not significant |
| 1988 | REACTOME_BETA_OXIDATION_OF_VERY_LONG_CHAIN_FATTY_ACIDS     | -1.44 | 1.07 | 0 | 0 | 0 | not significant |
| 1989 | GO_POSITIVE_REGULATION_OF_MRNA_3_END_PROCESSING            | -1.44 | 1.06 | 0 | 0 | 0 | not significant |
| 1990 | GO_PROTEIN_INSERTION_INTO_MITOCHONDRIAL_OUTER_MEMBRANE     | -1.44 | 1.04 | 0 | 0 | 0 | not significant |
| 1991 | REACTOME_PURINE_SALVAGE                                    | -1.44 | 1.04 | 0 | 0 | 0 | not significant |
| 1992 | GO_CYTIDINE_TO_URIDINE_EDITING                             | -1.44 | 1.03 | 0 | 0 | 0 | not significant |
| 1993 | GO_EMBRYONIC_CLEAVAGE                                      | -1.44 | 1.02 | 0 | 0 | 0 | not significant |
| 1994 | GO_TROPHECTODERMAL_CELL_DIFFERENTIATION                    | -1.44 | 1.01 | 0 | 0 | 0 | not significant |
| 1995 | GO_POSITIVE_REGULATION_OF_NUCLEOBASE_CONTAINING_COMPOUND   | -1.44 | 0.98 | 0 | 0 | 0 | not significant |
| 1996 | GO_COFACTOR_BINDING                                        | -1.43 | 4.00 | 0 | 0 | 0 | not significant |
| 1997 | GO_NUCLEOSIDE_PHOSPHATE_BIOSYNTHETIC_PROCESS               | -1.43 | 4.00 | 0 | 0 | 0 | not significant |
| 1998 | GO_PROTEIN_CONTAINING_COMPLEX_ASSEMBLY                     | -1.43 | 4.00 | 0 | 0 | 0 | not significant |
| 1999 | GO_PROTEIN_CONTAINING_COMPLEX_LOCALIZATION                 | -1.43 | 4.00 | 0 | 0 | 0 | not significant |
| 2000 | GO_REGULATION_OF_ION_TRANSPORT                             | -1.43 | 4.00 | 0 | 0 | 0 | not significant |
| 2001 | ONKEN_UVEAL_MELANOMA_UP                                    | -1.43 | 4.00 | 0 | 0 | 0 | not significant |
| 2002 | STEIN_ESRRA_TARGETS                                        | -1.43 | 4.00 | 0 | 0 | 0 | not significant |
| 2003 | YOSHIMURA_MAPK8_TARGETS_DN                                 | -1.43 | 4.00 | 0 | 0 | 0 | not significant |
| 2004 | DAVICIONI_TARGETS_OF_PAX_FOXP1_FUSIONS_UP                  | -1.43 | 2.46 | 0 | 0 | 0 | not significant |
| 2005 | IL2_UP.V1_UP                                               | -1.43 | 2.18 | 0 | 0 | 0 | not significant |
| 2006 | REACTOME_SIGNALING_BY_NOTCH                                | -1.43 | 1.98 | 0 | 0 | 0 | not significant |
| 2007 | GO_PROTEIN_HETEROLIGOMERIZATION                            | -1.43 | 1.92 | 0 | 0 | 0 | not significant |
| 2008 | REACTOME_ESTROGEN_DEPENDENT_GENE_EXPRESSION                | -1.43 | 1.89 | 0 | 0 | 0 | not significant |
| 2009 | REACTOME_NUCLEOTIDE_EXCISION_REPAIR                        | -1.43 | 1.88 | 0 | 0 | 0 | not significant |
| 2010 | CHIARADONNA_NEOPLASTIC_TRANSFORMATION_CDC25_DN             | -1.43 | 1.86 | 0 | 0 | 0 | not significant |
| 2011 | GO_RESPONSE_TO_PURINE_CONTAINING_COMPOUND                  | -1.43 | 1.85 | 0 | 0 | 0 | not significant |
| 2012 | GO_EXTRACELLULAR_MATRIX                                    | -1.43 | 1.78 | 0 | 0 | 0 | not significant |
| 2013 | GO_MONOCARBOXYLIC_ACID_CATABOLIC_PROCESS                   | -1.43 | 1.72 | 0 | 0 | 0 | not significant |
| 2014 | GO_CELLULAR_RESPONSE_TO_ACID_CHEMICAL                      | -1.43 | 1.65 | 0 | 0 | 0 | not significant |
| 2015 | GO_CELL_REDOX_HOMEOSTASIS                                  | -1.43 | 1.60 | 0 | 0 | 0 | not significant |
| 2016 | HALLMARK_UV_RESPONSE_UP                                    | -1.43 | 1.58 | 0 | 0 | 0 | not significant |
| 2017 | GO_RNA_POLYMERASE_II_HOLOENZYME                            | -1.43 | 1.50 | 0 | 0 | 0 | not significant |
| 2018 | VECCHI_GASTRIC_CANCER_ADVANCED_VS_EARLY_DN                 | -1.43 | 1.46 | 0 | 0 | 0 | not significant |
| 2019 | TURASHVILI_BREAST_DUCTAL_CARCINOMA_VS_DUCTAL_NORMAL_DN     | -1.43 | 1.44 | 0 | 0 | 0 | not significant |
| 2020 | GO_CHEMOKINE_PRODUCTION                                    | -1.43 | 1.43 | 0 | 0 | 0 | not significant |
| 2021 | KANG_IMMORTALIZED_BY_TERT_UP                               | -1.43 | 1.41 | 0 | 0 | 0 | not significant |
| 2022 | APPIERTO_RESPONSE_TO_FENRETINIDE_DN                        | -1.43 | 1.35 | 0 | 0 | 0 | not significant |
| 2023 | ZHAN_EARLY_DIFFERENTIATION_GENES_DN                        | -1.43 | 1.34 | 0 | 0 | 0 | not significant |
| 2024 | MASSARWEH_RESPONSE_TO ESTRADIOL                            | -1.43 | 1.33 | 0 | 0 | 0 | not significant |
| 2025 | GO_PRECATALYTIC_SPLICEOSOME                                | -1.43 | 1.29 | 0 | 0 | 0 | not significant |
| 2026 | REACTOME_PROCESSING_OF_CAPPED_INTRONLESS_PRE_MRNA          | -1.43 | 1.29 | 0 | 0 | 0 | not significant |
| 2027 | REACTOME_SIGNALING_BY_MODERATE_KINASE_ACTIVITY_BRAF_MUTA   | -1.43 | 1.29 | 0 | 0 | 0 | not significant |
| 2028 | CHR2P22                                                    | -1.43 | 1.26 | 0 | 0 | 0 | not significant |
| 2029 | PAPASPYRIDONOS_UNSTABLE_ATEROSCLEROTIC_PLAQUE_UP           | -1.43 | 1.26 | 0 | 0 | 0 | not significant |
| 2030 | SESTO_RESPONSE_TO_UV_C4                                    | -1.43 | 1.24 | 0 | 0 | 0 | not significant |
| 2031 | GO_REGULATION_OF_DEFENSE_RESPONSE_TO_VIRUS_BY_VIRUS        | -1.43 | 1.23 | 0 | 0 | 0 | not significant |
| 2032 | YAMASHITA_LIVER_CANCER_STEM_CELL_UP                        | -1.43 | 1.22 | 0 | 0 | 0 | not significant |
| 2033 | GO_SARCOMERE_ORGANIZATION                                  | -1.43 | 1.17 | 0 | 0 | 0 | not significant |
| 2034 | KEGG_PROTEIN_EXPORT                                        | -1.43 | 1.17 | 0 | 0 | 0 | not significant |
| 2035 | REACTOME_MOLECULES_ASSOCIATED_WITH_ELASTIC_FIBRES          | -1.43 | 1.17 | 0 | 0 | 0 | not significant |
| 2036 | GO_REGULATION_OF_CARDIAC_MUSCLE_CONTRACTION                | -1.43 | 1.14 | 0 | 0 | 0 | not significant |
| 2037 | HU_GENOTOXIC_DAMAGE_4HR                                    | -1.43 | 1.14 | 0 | 0 | 0 | not significant |
| 2038 | GO_REGULATION_OF_NAD_P_H_OXIDASE_ACTIVITY                  | -1.43 | 1.13 | 0 | 0 | 0 | not significant |
| 2039 | GO_SERINE_TRANSMEMBRANE_TRANSPORTER_ACTIVITY               | -1.43 | 1.13 | 0 | 0 | 0 | not significant |
| 2040 | BYSTRYKH_HEMATOPOIESIS_STEM_CELL_IL3RA                     | -1.43 | 1.12 | 0 | 0 | 0 | not significant |
| 2041 | GO_ATPASE_ACTIVITY_COUPLED_TO_TRANSMEMBRANE_MOVEMENT_O     | -1.43 | 1.12 | 0 | 0 | 0 | not significant |
| 2042 | REACTOME_POTASSIUM_CHANNELS                                | -1.43 | 1.12 | 0 | 0 | 0 | not significant |
| 2043 | GO_COA_HYDROLASE_ACTIVITY                                  | -1.43 | 1.11 | 0 | 0 | 0 | not significant |
| 2044 | GO_AZOLE_TRANSMEMBRANE_TRANSPORTER_ACTIVITY                | -1.43 | 1.10 | 0 | 0 | 0 | not significant |
| 2045 | GO_MATURATION_OF_LSU_RRNA_FROM_TRICISTRONIC_RRNA_TRANSC    | -1.43 | 1.10 | 0 | 0 | 0 | not significant |
| 2046 | ROY_WOUND_BLOOD_VESSEL_DN                                  | -1.43 | 1.10 | 0 | 0 | 0 | not significant |
| 2047 | GO_DETECTION_OF_MECHANICAL_STIMULUS_INVOLVED_IN_SENSORY_F  | -1.43 | 1.09 | 0 | 0 | 0 | not significant |
| 2048 | GO_GLYCINE_METABOLIC_PROCESS                               | -1.43 | 1.08 | 0 | 0 | 0 | not significant |
| 2049 | GO_NUCLEAR_NCRNA_SURVEILLANCE                              | -1.43 | 1.08 | 0 | 0 | 0 | not significant |
| 2050 | GO_REGULATION_OF_TYPE_2_IMMUNE_RESPONSE                    | -1.43 | 1.08 | 0 | 0 | 0 | not significant |
| 2051 | GO_MYELIN_ASSEMBLY                                         | -1.43 | 1.07 | 0 | 0 | 0 | not significant |
| 2052 | GO_STEREOCILIIUM_BUNDLE                                    | -1.43 | 1.07 | 0 | 0 | 0 | not significant |
| 2053 | GO_GLUTATHIONE_TRANSFERASE_ACTIVITY                        | -1.43 | 1.06 | 0 | 0 | 0 | not significant |
| 2054 | GO_POSITIVE_REGULATION_OF_PROTEIN_LOCALIZATION_TO_CELL_SUR | -1.43 | 1.06 | 0 | 0 | 0 | not significant |
| 2055 | BIOCARTA_ECM_PATHWAY                                       | -1.43 | 1.05 | 0 | 0 | 0 | not significant |
| 2056 | GO_MULTI_ORGANISM_CELLULAR_LOCALIZATION                    | -1.43 | 1.05 | 0 | 0 | 0 | not significant |
| 2057 | GO_REGULATION_OF_T_HELPER_1_CELL_DIFFERENTIATION           | -1.43 | 1.05 | 0 | 0 | 0 | not significant |
| 2058 | GO_CARBOHYDRATE_TRANSMEMBRANE_TRANSPORTER_ACTIVITY         | -1.43 | 1.04 | 0 | 0 | 0 | not significant |
| 2059 | GO_POTASSIUM_ION_IMPORT_ACROSS_PLASMA_MEMBRANE             | -1.43 | 1.04 | 0 | 0 | 0 | not significant |

|      |                                                             |       |      |   |   |   |                 |
|------|-------------------------------------------------------------|-------|------|---|---|---|-----------------|
| 2060 | GO_GLUCOSE_6_PHOSPHATE_METABOLIC_PROCESS                    | -1.43 | 1.03 | 0 | 0 | 0 | not significant |
| 2061 | GO_NUCLEAR_PORE_CENTRAL_TRANSPORT_CHANNEL                   | -1.43 | 1.03 | 0 | 0 | 0 | not significant |
| 2062 | GO_PSEUDOURIDINE_SYNTHASE_ACTIVITY                          | -1.43 | 1.02 | 0 | 0 | 0 | not significant |
| 2063 | GO_CENTRAL_NERVOUS_SYSTEM_NEURON_AXONOGENESIS               | -1.43 | 1.01 | 0 | 0 | 0 | not significant |
| 2064 | FIGUEROA_AML_METHYLATION_CLUSTER_4_DN                       | -1.43 | 1.00 | 0 | 0 | 0 | not significant |
| 2065 | CUL_TCF21_TARGETS_UP                                        | -1.43 | 0.98 | 0 | 0 | 0 | not significant |
| 2066 | GO_SUGAR_TRANSMEMBRANE_TRANSPORTER_ACTIVITY                 | -1.43 | 0.98 | 0 | 0 | 0 | not significant |
| 2067 | GO_DNA_CYTOSINE_DEAMINATION                                 | -1.43 | 0.97 | 0 | 0 | 0 | not significant |
| 2068 | GO_NEGATIVE_REGULATION_OF_SMOOTH_MUSCLE_CELL_MIGRATION      | -1.43 | 0.94 | 0 | 0 | 0 | not significant |
| 2069 | GO_SYNAPTIC_VESICLE_BUDDING                                 | -1.43 | 0.94 | 0 | 0 | 0 | not significant |
| 2070 | GO_DNA_DEAMINATION                                          | -1.43 | 0.91 | 0 | 0 | 0 | not significant |
| 2071 | ENK_UV_RESPONSE_KERATINOCYTE_DN                             | -1.42 | 4.00 | 0 | 0 | 0 | not significant |
| 2072 | GO_CELL_DIVISION                                            | -1.42 | 4.00 | 0 | 0 | 0 | not significant |
| 2073 | GO_CELLULAR_RESPONSE_TO_EXTERNAL_STIMULUS                   | -1.42 | 4.00 | 0 | 0 | 0 | not significant |
| 2074 | GO_ENZYME_REGULATOR_ACTIVITY                                | -1.42 | 4.00 | 0 | 0 | 0 | not significant |
| 2075 | GO_MORPHOGENESIS_OF_AN_EPITHELIUM                           | -1.42 | 4.00 | 0 | 0 | 0 | not significant |
| 2076 | REACTOME_SIGNALING_BY_RHO_GTPASES                           | -1.42 | 4.00 | 0 | 0 | 0 | not significant |
| 2077 | WIERENGA_STATS6_TARGETS_DN                                  | -1.42 | 2.49 | 0 | 0 | 0 | not significant |
| 2078 | REACTOME_OTHER_INTERLEUKIN_SIGNALING                        | -1.42 | 2.43 | 0 | 0 | 0 | not significant |
| 2079 | DEBIASI_APOPTOSIS_BY_REOVIRUS_INFECTION_DN                  | -1.42 | 2.37 | 0 | 0 | 0 | not significant |
| 2080 | GO_REGULATION_OF_CALCIIUM_ION_TRANSPORT                     | -1.42 | 2.20 | 0 | 0 | 0 | not significant |
| 2081 | SHETH_LIVER_CANCER_VS_TXNIP_LOSS_PAM1                       | -1.42 | 2.18 | 0 | 0 | 0 | not significant |
| 2082 | REACTOME_NEDDYLIATION                                       | -1.42 | 2.13 | 0 | 0 | 0 | not significant |
| 2083 | GO_MEMBRANE_FUSION                                          | -1.42 | 1.88 | 0 | 0 | 0 | not significant |
| 2084 | GO_REGULATION_OF_CYTOKINESIS                                | -1.42 | 1.79 | 0 | 0 | 0 | not significant |
| 2085 | KAAB_FAILED_HEART_ATRIUM_DN                                 | -1.42 | 1.77 | 0 | 0 | 0 | not significant |
| 2086 | RASHI_RESPONSE_TO_IONIZING_RADIATION_5                      | -1.42 | 1.74 | 0 | 0 | 0 | not significant |
| 2087 | GO_MITOCHONDRIAL_MEMBRANE_ORGANIZATION                      | -1.42 | 1.59 | 0 | 0 | 0 | not significant |
| 2088 | REACTOME_MITOCHONDRIAL_BIOGENESIS                           | -1.42 | 1.54 | 0 | 0 | 0 | not significant |
| 2089 | AMUNDSON_POOR_SURVIVAL_AFTER_GAMMA_RADIATION_8G             | -1.42 | 1.47 | 0 | 0 | 0 | not significant |
| 2090 | GO_REGULATION_OF_STEROID_METABOLIC_PROCESS                  | -1.42 | 1.44 | 0 | 0 | 0 | not significant |
| 2091 | KEGG_SYSTEMIC_LUPUS_ERYTHEMATOSUS                           | -1.42 | 1.43 | 0 | 0 | 0 | not significant |
| 2092 | LEE_AGING_NEOCORTEX_DN                                      | -1.42 | 1.43 | 0 | 0 | 0 | not significant |
| 2093 | GO_NEGATIVE_REGULATION_OF_PROTEIN_BINDING                   | -1.42 | 1.42 | 0 | 0 | 0 | not significant |
| 2094 | GO_METAL_CLUSTER_BINDING                                    | -1.42 | 1.40 | 0 | 0 | 0 | not significant |
| 2095 | CHR14Q12                                                    | -1.42 | 1.39 | 0 | 0 | 0 | not significant |
| 2096 | GO_TRANSCRIPTION_ELONGATION_FROM_RNA_POLYMERASE_II_PROM     | -1.42 | 1.39 | 0 | 0 | 0 | not significant |
| 2097 | GO_REGULATION_OF_MUSCLE_ADAPTATION                          | -1.42 | 1.38 | 0 | 0 | 0 | not significant |
| 2098 | GO_MUSCLE_ADAPTATION                                        | -1.42 | 1.36 | 0 | 0 | 0 | not significant |
| 2099 | GO_NEGATIVE_REGULATION_OF_RNA_METABOLIC_PROCESS             | -1.42 | 1.31 | 0 | 0 | 0 | not significant |
| 2100 | GO_PROTEIN_PEPTIDYL_PROLYL_ISOMERIZATION                    | -1.42 | 1.30 | 0 | 0 | 0 | not significant |
| 2101 | QUINTENS_EMBRYONIC_BRAIN_RESPONSE_TO_IR                     | -1.42 | 1.29 | 0 | 0 | 0 | not significant |
| 2102 | REACTOME_RAF_ACTIVATION                                     | -1.42 | 1.29 | 0 | 0 | 0 | not significant |
| 2103 | SMID_BREAST_CANCER_ERBB2_UP                                 | -1.42 | 1.28 | 0 | 0 | 0 | not significant |
| 2104 | REACTOME_SMOOTH_MUSCLE_CONTRACTION                          | -1.42 | 1.27 | 0 | 0 | 0 | not significant |
| 2105 | PID_EPHB_FWD_PATHWAY                                        | -1.42 | 1.23 | 0 | 0 | 0 | not significant |
| 2106 | GO_TERMINATION_OF_RNA_POLYMERASE_II_TRANSCRIPTION           | -1.42 | 1.22 | 0 | 0 | 0 | not significant |
| 2107 | CHR2Q32                                                     | -1.42 | 1.21 | 0 | 0 | 0 | not significant |
| 2108 | GO_POSITIVE_REGULATION_OF_TELOMERASE_ACTIVITY               | -1.42 | 1.21 | 0 | 0 | 0 | not significant |
| 2109 | LI_LUNG_CANCER                                              | -1.42 | 1.21 | 0 | 0 | 0 | not significant |
| 2110 | CORRE_MULTIPLE_MYELOMA_UP                                   | -1.42 | 1.20 | 0 | 0 | 0 | not significant |
| 2111 | GO_POSITIVE_REGULATION_OF_INTERLEUKIN_2_PRODUCTION          | -1.42 | 1.20 | 0 | 0 | 0 | not significant |
| 2112 | GO_POSITIVE_REGULATION_OF_TRANSCRIPTION_BY_RNA_POLYMERAS    | -1.42 | 1.19 | 0 | 0 | 0 | not significant |
| 2113 | TRACEY_RESISTANCE_TO_IFNA2_DN                               | -1.42 | 1.18 | 0 | 0 | 0 | not significant |
| 2114 | GO_SECRETORY_GNANULE_ORGANIZATION                           | -1.42 | 1.17 | 0 | 0 | 0 | not significant |
| 2115 | LINDSTEDT_DENDRITIC_CELL_MATURATION_D                       | -1.42 | 1.17 | 0 | 0 | 0 | not significant |
| 2116 | REACTOME_STRIATED_MUSCLE_CONTRACTION                        | -1.42 | 1.17 | 0 | 0 | 0 | not significant |
| 2117 | GO_LIGASE_ACTIVITY_FORMING_CARBON_SULFUR_BONDS              | -1.42 | 1.16 | 0 | 0 | 0 | not significant |
| 2118 | GO_RESPONSE_TO_ISCHEMIA                                     | -1.42 | 1.16 | 0 | 0 | 0 | not significant |
| 2119 | GO_REGULATION_OF_B_CELL_DIFFERENTIATION                     | -1.42 | 1.15 | 0 | 0 | 0 | not significant |
| 2120 | REACTOME_TRANSPORT_AND_SYNTHESIS_OF_PAPS                    | -1.42 | 1.15 | 0 | 0 | 0 | not significant |
| 2121 | GO_POSITIVE_REGULATION_OF_FAT_CELL_DIFFERENTIATION          | -1.42 | 1.14 | 0 | 0 | 0 | not significant |
| 2122 | GO_TOLL_LIKE_RECEPTOR_7_SIGNALING_PATHWAY                   | -1.42 | 1.14 | 0 | 0 | 0 | not significant |
| 2123 | PID_DELTA_NP63_PATHWAY                                      | -1.42 | 1.12 | 0 | 0 | 0 | not significant |
| 2124 | JIANG_TIP30_TARGETS_DN                                      | -1.42 | 1.11 | 0 | 0 | 0 | not significant |
| 2125 | GO_ZYMOGEN_ACTIVATION                                       | -1.42 | 1.10 | 0 | 0 | 0 | not significant |
| 2126 | KAMIKUBO_MYELOID_CEBPA_NETWORK                              | -1.42 | 1.10 | 0 | 0 | 0 | not significant |
| 2127 | PARK_APL_PATHOGENESIS_UP                                    | -1.42 | 1.10 | 0 | 0 | 0 | not significant |
| 2128 | REACTOME_MITOTIC_TELOPHASE_CYTOKINESIS                      | -1.42 | 1.10 | 0 | 0 | 0 | not significant |
| 2129 | BARRIER_CANCER_RELAPSE_NORMAL_SAMPLE_UP                     | -1.42 | 1.09 | 0 | 0 | 0 | not significant |
| 2130 | GO_REGULATION_OF_T_CELL_CYTOKINE_PRODUCTION                 | -1.42 | 1.09 | 0 | 0 | 0 | not significant |
| 2131 | ZWANG_EGF_PERSISTENTLY_UP                                   | -1.42 | 1.09 | 0 | 0 | 0 | not significant |
| 2132 | DAZARD_UV_RESPONSE_CLUSTER_G2                               | -1.42 | 1.08 | 0 | 0 | 0 | not significant |
| 2133 | GO_PROTEASOME_ASSEMBLY                                      | -1.42 | 1.08 | 0 | 0 | 0 | not significant |
| 2134 | ZUCCHI_METASTASIS_DN                                        | -1.42 | 1.08 | 0 | 0 | 0 | not significant |
| 2135 | GO_COENZYME_A_BIOSYNTHETIC_PROCESS                          | -1.42 | 1.07 | 0 | 0 | 0 | not significant |
| 2136 | GO_POSITIVE_REGULATION_OF_GLIAL_CELL_DIFFERENTIATION        | -1.42 | 1.07 | 0 | 0 | 0 | not significant |
| 2137 | GO_RESPONSE_TO_ANGIOTENSIN                                  | -1.42 | 1.07 | 0 | 0 | 0 | not significant |
| 2138 | AKL_HTLV1_INFECTION_UP                                      | -1.42 | 1.06 | 0 | 0 | 0 | not significant |
| 2139 | GO_POSITIVE_REGULATION_OF_CALCINEURIN_MEDIATED_SIGNALING    | -1.42 | 1.06 | 0 | 0 | 0 | not significant |
| 2140 | MA_PITUITARY_FETAL_VS_ADULT_DN                              | -1.42 | 1.06 | 0 | 0 | 0 | not significant |
| 2141 | GO_CELLULAR_RESPONSE_TO_PURINE_CONTAINING_COMPOUND          | -1.42 | 1.05 | 0 | 0 | 0 | not significant |
| 2142 | GO_POSITIVE_REGULATION_OF_OXIDATIVE_STRESS_INDUCED_INTRINSI | -1.42 | 1.05 | 0 | 0 | 0 | not significant |
| 2143 | GO_ISOPRENOLID_BINDING                                      | -1.42 | 1.04 | 0 | 0 | 0 | not significant |
| 2144 | GO_CYTIDINE_DEAMINASE_ACTIVITY                              | -1.42 | 1.03 | 0 | 0 | 0 | not significant |
| 2145 | GO_MONONUCLEAR_CELL_MIGRATION                               | -1.42 | 1.03 | 0 | 0 | 0 | not significant |
| 2146 | REACTOME_RECYCLING_OF_EIF2_GDP                              | -1.42 | 1.02 | 0 | 0 | 0 | not significant |
| 2147 | LIANG_HEMATOPOIESIS_STEM_CELL_NUMBER_QTL                    | -1.42 | 1.01 | 0 | 0 | 0 | not significant |
| 2148 | KUROKAWA_LIVER_CANCER_EARLY_RECURRENCE_DN                   | -1.42 | 1.00 | 0 | 0 | 0 | not significant |
| 2149 | GO_CELL_COMMUNICATION_BY_ELECTRICAL_COUPLING_INVOLVED_IN_I  | -1.42 | 0.99 | 0 | 0 | 0 | not significant |
| 2150 | GO_HISTONE_SERINE_PHOSPHORYLATION                           | -1.42 | 0.99 | 0 | 0 | 0 | not significant |
| 2151 | BUKANOVICH_T_LYMPHOCYTE_HOMING_ON_TUMOR_DN                  | -1.42 | 0.98 | 0 | 0 | 0 | not significant |
| 2152 | WIEMANN_TELOMERE_SHORTENING_AND_CHRONIC_LIVER_DAMAGE_UP     | -1.42 | 0.98 | 0 | 0 | 0 | not significant |
| 2153 | GO_NUCLEOLAR_RIBONUCLEASE_P_COMPLEX                         | -1.42 | 0.97 | 0 | 0 | 0 | not significant |
| 2154 | GO_PROTEIN_K6_LINKED_UBIQUITINATION                         | -1.42 | 0.97 | 0 | 0 | 0 | not significant |
| 2155 | GO_GLYCEROL_ETHER_BIOSYNTHETIC_PROCESS                      | -1.42 | 0.95 | 0 | 0 | 0 | not significant |
| 2156 | BIOCARTA_UCALPAIN_PATHWAY                                   | -1.42 | 0.94 | 0 | 0 | 0 | not significant |
| 2157 | GO_RIBONUCLEASE_P_ACTIVITY                                  | -1.42 | 0.93 | 0 | 0 | 0 | not significant |
| 2158 | GO_DRUG_BINDING                                             | -1.41 | 4.00 | 0 | 0 | 0 | not significant |
| 2159 | GO_MITOTIC_CELL_CYCLE                                       | -1.41 | 4.00 | 0 | 0 | 0 | not significant |
| 2160 | GO_NEGATIVE_REGULATION_OF_CELL_CYCLE_PHASE_TRANSITION       | -1.41 | 4.00 | 0 | 0 | 0 | not significant |
| 2161 | GO_RESPONSE_TO_EXTRACELLULAR_STIMULUS                       | -1.41 | 4.00 | 0 | 0 | 0 | not significant |
| 2162 | GO_RESPONSE_TO_OXIDATIVE_STRESS                             | -1.41 | 4.00 | 0 | 0 | 0 | not significant |
| 2163 | GO_ACTIN_FILAMENT_BINDING                                   | -1.41 | 2.47 | 0 | 0 | 0 | not significant |
| 2164 | GO_NUCLEOSIDE_PHOSPHATE_METABOLIC_PROCESS                   | -1.41 | 2.46 | 0 | 0 | 0 | not significant |
| 2165 | REACTOME_DISEASES_OF_SIGNAL_TRANSDUCTION                    | -1.41 | 2.35 | 0 | 0 | 0 | not significant |
| 2166 | CREIGHTON_ENDOCRINE_THERAPY_RESISTANCE_1                    | -1.41 | 2.29 | 0 | 0 | 0 | not significant |
| 2167 | GO_CELLULAR_RESPONSE_TO_STEROID_HORMONE_STIMULUS            | -1.41 | 2.17 | 0 | 0 | 0 | not significant |
| 2168 | GO_POSITIVE_REGULATION_OF_NUCLEOBASE_CONTAINING_COMPOUND    | -1.41 | 2.15 | 0 | 0 | 0 | not significant |

|      |                                                            |       |      |   |   |   |                 |
|------|------------------------------------------------------------|-------|------|---|---|---|-----------------|
| 2169 | GO_UROGENITAL_SYSTEM_DEVELOPMENT                           | -1.41 | 2.14 | 0 | 0 | 0 | not significant |
| 2170 | REACTOME_DEUBIQUITINATION                                  | -1.41 | 2.05 | 0 | 0 | 0 | not significant |
| 2171 | HOSHIDA_LIVER_CANCER_SUBCLASS_S3                           | -1.41 | 2.01 | 0 | 0 | 0 | not significant |
| 2172 | SMID_BREAST_CANCER_LUMINAL_B_UP                            | -1.41 | 1.67 | 0 | 0 | 0 | not significant |
| 2173 | DARWICHE_SQUAMOUS_CELL_CARCINOMA_UP                        | -1.41 | 1.63 | 0 | 0 | 0 | not significant |
| 2174 | MENSE_HYPOXIA_UP                                           | -1.41 | 1.59 | 0 | 0 | 0 | not significant |
| 2175 | GO_POSITIVE_REGULATION_OF_LEUKOCYTE_PROLIFERATION          | -1.41 | 1.57 | 0 | 0 | 0 | not significant |
| 2176 | WANG_ESOPHAGUS_CANCER_VS_NORMAL_DN                         | -1.41 | 1.57 | 0 | 0 | 0 | not significant |
| 2177 | HSIAO_LIVER_SPECIFIC_GENES                                 | -1.41 | 1.56 | 0 | 0 | 0 | not significant |
| 2178 | IL21_UP_V1_UP                                              | -1.41 | 1.52 | 0 | 0 | 0 | not significant |
| 2179 | REACTOME_CLASS_A_1_RHODOPSIN_LIKE_RECEPTORS                | -1.41 | 1.49 | 0 | 0 | 0 | not significant |
| 2180 | ICHIBA_GRAFT_VERSUS_HOST_DISEASE_D7_UP                     | -1.41 | 1.46 | 0 | 0 | 0 | not significant |
| 2181 | GO_ORGANIC_HYDROXY_COMPOUND_CATABOLIC_PROCESS              | -1.41 | 1.43 | 0 | 0 | 0 | not significant |
| 2182 | GO_REGULATION_OF_MUSCLE_CONTRACTION                        | -1.41 | 1.40 | 0 | 0 | 0 | not significant |
| 2183 | GO_RESPONSE_TO_AMMONIUM_ION                                | -1.41 | 1.40 | 0 | 0 | 0 | not significant |
| 2184 | KEGG_GAP_JUNCTION                                          | -1.41 | 1.37 | 0 | 0 | 0 | not significant |
| 2185 | HALLMARK_REACTIVE_OXYGEN_SPECIES_PATHWAY                   | -1.41 | 1.36 | 0 | 0 | 0 | not significant |
| 2186 | PID_CDC42_PATHWAY                                          | -1.41 | 1.35 | 0 | 0 | 0 | not significant |
| 2187 | SHEPARD_BMYB_TARGETS                                       | -1.41 | 1.35 | 0 | 0 | 0 | not significant |
| 2188 | GO_CHROMOSOME_SEPARATION                                   | -1.41 | 1.34 | 0 | 0 | 0 | not significant |
| 2189 | GO_REGULATION_OF_SODIUM_ION_TRANSMEMBRANE_TRANSPORT        | -1.41 | 1.32 | 0 | 0 | 0 | not significant |
| 2190 | REACTOME_TRANSLOCATION_OF_SLC2A4_GLUT4_TO_THE_PLASMA_MI    | -1.41 | 1.29 | 0 | 0 | 0 | not significant |
| 2191 | GO_CARDIAC_CELL_DEVELOPMENT                                | -1.41 | 1.28 | 0 | 0 | 0 | not significant |
| 2192 | AMIT_EGF_RESPONSE_480_MCF10A                               | -1.41 | 1.27 | 0 | 0 | 0 | not significant |
| 2193 | REACTOME_EPH_EPHRIN_SIGNALING                              | -1.41 | 1.27 | 0 | 0 | 0 | not significant |
| 2194 | GO_BODY_MORPHOGENESIS                                      | -1.41 | 1.26 | 0 | 0 | 0 | not significant |
| 2195 | PID_IL12_2PATHWAY                                          | -1.41 | 1.25 | 0 | 0 | 0 | not significant |
| 2196 | GO_ALCOHOL_CATABOLIC_PROCESS                               | -1.41 | 1.21 | 0 | 0 | 0 | not significant |
| 2197 | GO_REGULATION_OF_PROTEIN_MATURATION                        | -1.41 | 1.21 | 0 | 0 | 0 | not significant |
| 2198 | BROWNE_HCMV_INFECTION_6HR_UP                               | -1.41 | 1.20 | 0 | 0 | 0 | not significant |
| 2199 | BURTON_ADIPOGENESIS_PEAK_AT_8HR                            | -1.41 | 1.19 | 0 | 0 | 0 | not significant |
| 2200 | NAKAYAMA_SOFT_TISSUE_TUMORS_PCA1_UP                        | -1.41 | 1.19 | 0 | 0 | 0 | not significant |
| 2201 | GO_NUCLEAR_ENVELOPE_REASSEMBLY                             | -1.41 | 1.18 | 0 | 0 | 0 | not significant |
| 2202 | GO_POSITIVE_REGULATION_OF_UBIQUITIN_PROTEIN_TRANSFERASE_AC | -1.41 | 1.18 | 0 | 0 | 0 | not significant |
| 2203 | REACTOME_BMAL1:CLOCK_NPAS2_ACTIVATES_CIRCADIAN_GENE_EXPR   | -1.41 | 1.17 | 0 | 0 | 0 | not significant |
| 2204 | BIOCARTA_AKAP95_PATHWAY                                    | -1.41 | 1.15 | 0 | 0 | 0 | not significant |
| 2205 | GO_MICROVILLUS_ORGANIZATION                                | -1.41 | 1.15 | 0 | 0 | 0 | not significant |
| 2206 | GO_INTRINSIC_APOPTOTIC_SIGNALING_PATHWAY_IN_RESPONSE_TO_O  | -1.41 | 1.14 | 0 | 0 | 0 | not significant |
| 2207 | GO_SKELETAL_MUSCLE_TISSUE_REGENERATION                     | -1.41 | 1.12 | 0 | 0 | 0 | not significant |
| 2208 | KYNG_ENVIRONMENTAL_STRESS_RESPONSE_NOT_BY_4NQO_IN_WS       | -1.41 | 1.10 | 0 | 0 | 0 | not significant |
| 2209 | GO_PROTEIN_KINASE_A_REGULATORY_SUBUNIT_BINDING             | -1.41 | 1.08 | 0 | 0 | 0 | not significant |
| 2210 | GO_RESPONSE_TO_MORPHINE                                    | -1.41 | 1.08 | 0 | 0 | 0 | not significant |
| 2211 | HOFMANN_CELL_LYMPHOMA_DN                                   | -1.41 | 1.08 | 0 | 0 | 0 | not significant |
| 2212 | DACOSTA_ERCC3_ALLELE_XPCS_VS_TTD_UP                        | -1.41 | 1.05 | 0 | 0 | 0 | not significant |
| 2213 | GO_NUCLEAR_LOCALIZATION_SEQUENCE_BINDING                   | -1.41 | 1.05 | 0 | 0 | 0 | not significant |
| 2214 | BIOCARTA_PPARG_PATHWAY                                     | -1.41 | 1.04 | 0 | 0 | 0 | not significant |
| 2215 | GO_CARBON_NITROGEN_LYASE_ACTIVITY                          | -1.41 | 1.03 | 0 | 0 | 0 | not significant |
| 2216 | GO_NEGATIVE_REGULATION_OF_MYELOID_CELL_APOPTOTIC_PROCES    | -1.41 | 1.02 | 0 | 0 | 0 | not significant |
| 2217 | GO_NEGATIVE_REGULATION_OF_PROTEIN_LOCALIZATION_TO_MEMBRA   | -1.41 | 1.02 | 0 | 0 | 0 | not significant |
| 2218 | GO_POSITIVE_REGULATION_OF_MONOOXYGENASE_ACTIVITY           | -1.41 | 1.02 | 0 | 0 | 0 | not significant |
| 2219 | PID_INTEGRIN_A9B1_PATHWAY                                  | -1.41 | 1.01 | 0 | 0 | 0 | not significant |
| 2220 | GO_NUCLEAR_POLYADENYLATION_DEPENDENT_TRNA_CATABOLIC_PRC    | -1.41 | 0.99 | 0 | 0 | 0 | not significant |
| 2221 | GO_ADULT_HEART_DEVELOPMENT                                 | -1.41 | 0.97 | 0 | 0 | 0 | not significant |
| 2222 | GO_MITOCHONDRIAL_ACETYL_COA_BIOSYNTHETIC_PROCESS_FROM_P    | -1.41 | 0.97 | 0 | 0 | 0 | not significant |
| 2223 | GO_REGULATION_OF_CARDIAC_MUSCLE_ADAPTATION                 | -1.41 | 0.97 | 0 | 0 | 0 | not significant |
| 2224 | GO_POSITIVE_REGULATION_OF_MONOCYTE_CHEMOTAXIS              | -1.41 | 0.96 | 0 | 0 | 0 | not significant |
| 2225 | OXFORD_RALA_TARGETS_DN                                     | -1.41 | 0.96 | 0 | 0 | 0 | not significant |
| 2226 | SCHAEFFER_PROSTATE_DEVELOPMENT_12HR_DN                     | -1.41 | 0.96 | 0 | 0 | 0 | not significant |
| 2227 | GO_TOXIN_METABOLIC_PROCESS                                 | -1.41 | 0.94 | 0 | 0 | 0 | not significant |
| 2228 | OHASHI_AURKA_TARGETS                                       | -1.41 | 0.93 | 0 | 0 | 0 | not significant |
| 2229 | GO_FEMALE_MEIOSIS_I                                        | -1.41 | 0.92 | 0 | 0 | 0 | not significant |
| 2230 | KEGG_ASCORBATE_AND_ALDARATE_METABOLISM                     | -1.41 | 0.92 | 0 | 0 | 0 | not significant |
| 2231 | REACTOME_WAX_AND_PLASMOGEN_BIOSYNTHESIS                    | -1.41 | 0.92 | 0 | 0 | 0 | not significant |
| 2232 | GO_HISTONE_H4_R3_METHYLATION                               | -1.41 | 0.90 | 0 | 0 | 0 | not significant |
| 2233 | ACEVEDO_LIVER_CANCER_UP                                    | -1.40 | 4.00 | 0 | 0 | 0 | not significant |
| 2234 | CUI_TCF21_TARGETS_2_UP                                     | -1.40 | 4.00 | 0 | 0 | 0 | not significant |
| 2235 | GO_CELLULAR_RESPONSE_TO_ORGANIC_CYCLIC_COMPOUND            | -1.40 | 4.00 | 0 | 0 | 0 | not significant |
| 2236 | GO_MRNA_METABOLIC_PROCESS                                  | -1.40 | 4.00 | 0 | 0 | 0 | not significant |
| 2237 | YANG_BCL3_TARGETS_UP                                       | -1.40 | 2.43 | 0 | 0 | 0 | not significant |
| 2238 | NABA_MATRISOME_ASSOCIATED                                  | -1.40 | 2.41 | 0 | 0 | 0 | not significant |
| 2239 | ENK_UV_RESPONSE_EPIDERMIS_UP                               | -1.40 | 2.40 | 0 | 0 | 0 | not significant |
| 2240 | SMID_BREAST_CANCER_RELAPSE_IN_BONE_DN                      | -1.40 | 2.00 | 0 | 0 | 0 | not significant |
| 2241 | GO_PURINE_CONTAINING_COMPOUND_METABOLIC_PROCESS            | -1.40 | 1.80 | 0 | 0 | 0 | not significant |
| 2242 | REACTOME_REGULATION_OF_LIPID_METABOLISM_BY_PEROXISOME_PR   | -1.40 | 1.73 | 0 | 0 | 0 | not significant |
| 2243 | SMITH_TERT_TARGETS_DN                                      | -1.40 | 1.58 | 0 | 0 | 0 | not significant |
| 2244 | EBAUER_TARGETS_OF_PAX3_FOXP1_FUSION_UP                     | -1.40 | 1.53 | 0 | 0 | 0 | not significant |
| 2245 | GO_ANTIGEN_PROCESSING_AND_PRESENTATION_OF_PEPTIDE_OR_POI   | -1.40 | 1.53 | 0 | 0 | 0 | not significant |
| 2246 | DER_IFN_ALPHA_RESPONSE_UP                                  | -1.40 | 1.52 | 0 | 0 | 0 | not significant |
| 2247 | GO_VESICLE_TARGETING_TO_FROM_OR_WITHIN_GOLGI               | -1.40 | 1.44 | 0 | 0 | 0 | not significant |
| 2248 | SUNG_METASTASIS_STROMA_UP                                  | -1.40 | 1.42 | 0 | 0 | 0 | not significant |
| 2249 | GO_DIGESTIVE_SYSTEM_DEVELOPMENT                            | -1.40 | 1.39 | 0 | 0 | 0 | not significant |
| 2250 | GO_CELL_CELL_ADHERENS_JUNCTION                             | -1.40 | 1.37 | 0 | 0 | 0 | not significant |
| 2251 | GO_NEGATIVE_REGULATION_OF_RNA_CATABOLIC_PROCESS            | -1.40 | 1.36 | 0 | 0 | 0 | not significant |
| 2252 | PID_HEDGEHOG_GLI_PATHWAY                                   | -1.40 | 1.34 | 0 | 0 | 0 | not significant |
| 2253 | MORI_LARGE_PRE_BII_LYMPHOCYTE_DN                           | -1.40 | 1.27 | 0 | 0 | 0 | not significant |
| 2254 | BRUINS_UVC_RESPONSE_VIA_TP53_GROUP_C                       | -1.40 | 1.26 | 0 | 0 | 0 | not significant |
| 2255 | REACTOME_G_ALPHA_Z_SIGNALING_EVENTS                        | -1.40 | 1.23 | 0 | 0 | 0 | not significant |
| 2256 | GO_CARBOHYDRATE_KINASE_ACTIVITY                            | -1.40 | 1.22 | 0 | 0 | 0 | not significant |
| 2257 | KORKOLA_EMBRYONAL_CARCINOMA_UP                             | -1.40 | 1.22 | 0 | 0 | 0 | not significant |
| 2258 | GO_HOMOTYPIC_CELL_CELL_ADHESION                            | -1.40 | 1.21 | 0 | 0 | 0 | not significant |
| 2259 | KAMMINGA_EZH2_TARGETS                                      | -1.40 | 1.17 | 0 | 0 | 0 | not significant |
| 2260 | REACTOME_MICRORNA_MIRNA_BIOGENESIS                         | -1.40 | 1.14 | 0 | 0 | 0 | not significant |
| 2261 | BORLAK_LIVER_CANCER_EGF_UP                                 | -1.40 | 1.13 | 0 | 0 | 0 | not significant |
| 2262 | GO_MEMBRANE_REPOLARIZATION                                 | -1.40 | 1.12 | 0 | 0 | 0 | not significant |
| 2263 | GO_RESPONSE_TO_PROGESTERONE                                | -1.40 | 1.12 | 0 | 0 | 0 | not significant |
| 2264 | UYANG_PROSTATE_CANCER_PROGRESSION_DN                       | -1.40 | 1.12 | 0 | 0 | 0 | not significant |
| 2265 | GO_MAIN_AXON                                               | -1.40 | 1.11 | 0 | 0 | 0 | not significant |
| 2266 | GO_POTASSIUM_CHANNEL_ACTIVITY                              | -1.40 | 1.11 | 0 | 0 | 0 | not significant |
| 2267 | WANG_METASTASIS_OF_BREAST_CANCER_ESR1_UP                   | -1.40 | 1.10 | 0 | 0 | 0 | not significant |
| 2268 | BIOCARTA_RHO_PATHWAY                                       | -1.40 | 1.09 | 0 | 0 | 0 | not significant |
| 2269 | PETRETTO_HEART_MASS_QTL_CIS_DN                             | -1.40 | 1.06 | 0 | 0 | 0 | not significant |
| 2270 | RUAN_RESPONSE_TO_TROGLITAZONE_UP                           | -1.40 | 1.06 | 0 | 0 | 0 | not significant |
| 2271 | MAGRANGEAS_MULTIPLE_MYELOMA_IGG_VS_IGA_DN                  | -1.40 | 1.05 | 0 | 0 | 0 | not significant |
| 2272 | REACTOME_ATTENUATION_PHASE                                 | -1.40 | 1.05 | 0 | 0 | 0 | not significant |
| 2273 | GO_SEMI_LUNAR_VALVE_DEVELOPMENT                            | -1.40 | 1.04 | 0 | 0 | 0 | not significant |
| 2274 | NEBEN_AML_WITH FLT3_OR_NRAS_UP                             | -1.40 | 1.03 | 0 | 0 | 0 | not significant |
| 2275 | GO_CALCIIUM_IMPORT_INTO_THE_MITOCHONDRION                  | -1.40 | 1.02 | 0 | 0 | 0 | not significant |
| 2276 | GO_SPINDLE_POLE_CENTROSOME                                 | -1.40 | 1.02 | 0 | 0 | 0 | not significant |
| 2277 | GO_ALDEHYDE_LYASE_ACTIVITY                                 | -1.40 | 1.01 | 0 | 0 | 0 | not significant |

|      |                                                                  |       |      |   |   |   |                 |
|------|------------------------------------------------------------------|-------|------|---|---|---|-----------------|
| 2278 | HOFMANN_MYELODYSPLASTIC_SYNDROM_LOW_RISK_DN                      | -1.40 | 1.01 | 0 | 0 | 0 | not significant |
| 2279 | GO_ESTABLISHMENT_OR_MAINTENANCE_OF_MONOPOLAR_CELL_POLARITY       | -1.40 | 1.00 | 0 | 0 | 0 | not significant |
| 2280 | MAHADEVAN_RESPONSE_TO_MP470_UP                                   | -1.40 | 1.00 | 0 | 0 | 0 | not significant |
| 2281 | GO_REGULATION_OF_T_HELPER_2_CELL_DIFFERENTIATION                 | -1.40 | 0.99 | 0 | 0 | 0 | not significant |
| 2282 | NIELSEN_LEIOMYOSARCOMA_UP                                        | -1.40 | 0.99 | 0 | 0 | 0 | not significant |
| 2283 | GO CARBON NITROGEN LIGASE ACTIVITY WITH GLUTAMINE AS AMIDE       | -1.40 | 0.98 | 0 | 0 | 0 | not significant |
| 2284 | HERNANDEZ_ABERRANT_MITOSIS_BY_DOCETACEL_2NM_DN                   | -1.40 | 0.97 | 0 | 0 | 0 | not significant |
| 2285 | TSAI_DNAJB4_TARGETS_UP                                           | -1.40 | 0.97 | 0 | 0 | 0 | not significant |
| 2286 | GAVIN_IL2_RESPONSEIVE_FOXP3_TARGETS_UP                           | -1.40 | 0.96 | 0 | 0 | 0 | not significant |
| 2287 | GO_PROTEIN_LOCALIZATION_TO_CYTOPLASMIC_STRESS_GRANULE            | -1.40 | 0.96 | 0 | 0 | 0 | not significant |
| 2288 | GO_NEGATIVE_REGULATION_OF_AUTOPHAGOSOME_ASSEMBLY                 | -1.40 | 0.95 | 0 | 0 | 0 | not significant |
| 2289 | MYLLYKANGAS_AMPLIFICATION_HOT_SPOT_15                            | -1.40 | 0.95 | 0 | 0 | 0 | not significant |
| 2290 | GO_NEGATIVE_REGULATION_OF_CHOLESTEROL_STORAGE                    | -1.40 | 0.94 | 0 | 0 | 0 | not significant |
| 2291 | REACTOME_P130CAS_LINKAGE_TO_MAPK_SIGNALING_FOR_INTEGRINS         | -1.40 | 0.94 | 0 | 0 | 0 | not significant |
| 2292 | GO_DE_NOVO_PYRIMIDINE_NUCLEOBASE_BIOSYNTHETIC_PROCESS            | -1.40 | 0.93 | 0 | 0 | 0 | not significant |
| 2293 | GO_POSITIVE_REGULATION_OF_BEHAVIOR                               | -1.40 | 0.93 | 0 | 0 | 0 | not significant |
| 2294 | GO_NUCLEAR_IMPORT_SIGNAL_RECEPTOR_ACTIVITY                       | -1.40 | 0.92 | 0 | 0 | 0 | not significant |
| 2295 | GO_PTW_PP1_PHOSPHATASE_COMPLEX                                   | -1.40 | 0.92 | 0 | 0 | 0 | not significant |
| 2296 | SUZUKI_RESPONSE_TO_TSA_AND_DECITABINE_1B                         | -1.40 | 0.92 | 0 | 0 | 0 | not significant |
| 2297 | BIOCARTA_SALMONELLA_PATHWAY                                      | -1.40 | 0.91 | 0 | 0 | 0 | not significant |
| 2298 | GO_PROTEIN_INSERTION_INTO_MITOCHONDRIAL_INNER_MEMBRANE           | -1.40 | 0.91 | 0 | 0 | 0 | not significant |
| 2299 | GO_REGULATION_OF_SECONDARY_HEART_FIELD_CARDIOBLAST_PROLIFERATION | -1.40 | 0.90 | 0 | 0 | 0 | not significant |
| 2300 | CHEN_METABOLIC_SYNDROM_NETWORK                                   | -1.39 | 4.00 | 0 | 0 | 0 | not significant |
| 2301 | GO_METAL_ION_TRANSPORT                                           | -1.39 | 4.00 | 0 | 0 | 0 | not significant |
| 2302 | GO_PEPTIDE_BIOSYNTHETIC_PROCESS                                  | -1.39 | 4.00 | 0 | 0 | 0 | not significant |
| 2303 | GO_RESPONSE_TO_ENDOGENOUS_STIMULUS                               | -1.39 | 4.00 | 0 | 0 | 0 | not significant |
| 2304 | GO_RESPONSE_TO_OXYGEN_CONTAINING_COMPOUND                        | -1.39 | 4.00 | 0 | 0 | 0 | not significant |
| 2305 | REACTOME_HEMOSTASIS                                              | -1.39 | 4.00 | 0 | 0 | 0 | not significant |
| 2306 | GCNP_SHH_UP_LATE.V1_UP                                           | -1.39 | 2.16 | 0 | 0 | 0 | not significant |
| 2307 | GRAESSMANN_RESPONSE_TO_MC_AND_SERUM_DEPRIVATION_UP               | -1.39 | 2.03 | 0 | 0 | 0 | not significant |
| 2308 | GO_HEMATOPOIETIC_PROGENITOR_CELL_DIFFERENTIATION                 | -1.39 | 1.89 | 0 | 0 | 0 | not significant |
| 2309 | GO_GENE_SILENCING_BY_RNA                                         | -1.39 | 1.88 | 0 | 0 | 0 | not significant |
| 2310 | LTE2_UP.V1_DN                                                    | -1.39 | 1.88 | 0 | 0 | 0 | not significant |
| 2311 | GO_RESPONSE_TO_INTERFERON_GAMMA                                  | -1.39 | 1.81 | 0 | 0 | 0 | not significant |
| 2312 | GO_ALCOHOL_BIOSYNTHETIC_PROCESS                                  | -1.39 | 1.80 | 0 | 0 | 0 | not significant |
| 2313 | HALLMARK_XENOBIOTIC_METABOLISM                                   | -1.39 | 1.79 | 0 | 0 | 0 | not significant |
| 2314 | WAMUNYOKOLI_OVARIAN_CANCER_GRADES_1_2_UP                         | -1.39 | 1.73 | 0 | 0 | 0 | not significant |
| 2315 | GO_CELLULAR_RESPONSE_TO_STARVATION                               | -1.39 | 1.72 | 0 | 0 | 0 | not significant |
| 2316 | REACTOME_REGULATION_OF_PLK1_ACTIVITY_AT_G2_M_TRANSITION          | -1.39 | 1.62 | 0 | 0 | 0 | not significant |
| 2317 | TAKAO_RESPONSE_TO_UVB_RADIATION_UP                               | -1.39 | 1.57 | 0 | 0 | 0 | not significant |
| 2318 | KIM_WT1_TARGETS_12HR_UP                                          | -1.39 | 1.54 | 0 | 0 | 0 | not significant |
| 2319 | GO_ACTIVATION_OF_CYSTEINE_TYPE_ENDOPEPTIDASE_ACTIVITY_INVO       | -1.39 | 1.40 | 0 | 0 | 0 | not significant |
| 2320 | GO_TRANSCRIPTION_FACTOR_TFIID_COMPLEX                            | -1.39 | 1.37 | 0 | 0 | 0 | not significant |
| 2321 | FLECHNER_PBL_KIDNEY_TRANSPLANT_REJECTED_VS_OK_UP                 | -1.39 | 1.31 | 0 | 0 | 0 | not significant |
| 2322 | KEGG_B_CELL_RECEPTOR_SIGNALING_PATHWAY                           | -1.39 | 1.25 | 0 | 0 | 0 | not significant |
| 2323 | GO_REGULATION_OF_SODIUM_ION_TRANSPORT                            | -1.39 | 1.23 | 0 | 0 | 0 | not significant |
| 2324 | IRITANI_MAD1_TARGETS_DN                                          | -1.39 | 1.21 | 0 | 0 | 0 | not significant |
| 2325 | JOHANSSON_BRAIN_CANCER_EARLY_VS_LATE_DN                          | -1.39 | 1.12 | 0 | 0 | 0 | not significant |
| 2326 | GO_EXOSOME_RNASE_COMPLEX                                         | -1.39 | 1.08 | 0 | 0 | 0 | not significant |
| 2327 | GO_STEROL_HOMEOSTASIS                                            | -1.39 | 1.07 | 0 | 0 | 0 | not significant |
| 2328 | WANG_BARRETTES_ESOPHAGUS_AND_ESOPHAGUS_CANCER_DN                 | -1.39 | 1.07 | 0 | 0 | 0 | not significant |
| 2329 | GO_INNER_EAR_RECEPTOR_CELL_DEVELOPMENT                           | -1.39 | 1.04 | 0 | 0 | 0 | not significant |
| 2330 | REACTOME_SYNTHESIS_OF_BILE_ACIDS_AND_BILE_SALTS                  | -1.39 | 1.04 | 0 | 0 | 0 | not significant |
| 2331 | GO_XENOBIOTIC_CATABOLIC_PROCESS                                  | -1.39 | 1.03 | 0 | 0 | 0 | not significant |
| 2332 | GO_CORECEPTOR_ACTIVITY                                           | -1.39 | 1.02 | 0 | 0 | 0 | not significant |
| 2333 | REACTOME_BASIGIN_INTERACTIONS                                    | -1.39 | 1.02 | 0 | 0 | 0 | not significant |
| 2334 | GO_NUCLEAR_PORE_OUTER_RING                                       | -1.39 | 1.01 | 0 | 0 | 0 | not significant |
| 2335 | GO_OXIDOREDUCTASE_ACTIVITY_ACTING_ON_THE_CH_NH_GROUP_OF          | -1.39 | 1.00 | 0 | 0 | 0 | not significant |
| 2336 | GO_NEGATIVE_REGULATION_OF_NECROTIC_CELL_DEATH                    | -1.39 | 0.99 | 0 | 0 | 0 | not significant |
| 2337 | GO_RIBONUCLEOSIDE_CATABOLIC_PROCESS                              | -1.39 | 0.98 | 0 | 0 | 0 | not significant |
| 2338 | KYNG_DNA_DAMAGE_BY_4NQO_OR_GAMMA_RADIATION                       | -1.39 | 0.97 | 0 | 0 | 0 | not significant |
| 2339 | GO_CARNITINE_SHUTTLE                                             | -1.39 | 0.96 | 0 | 0 | 0 | not significant |
| 2340 | GO_CHONDROCYTE_DIFFERENTIATION_INVOLVED_IN_ENDOCHONDRAL          | -1.39 | 0.96 | 0 | 0 | 0 | not significant |
| 2341 | GO_F_ACTIN_CAPPING_PROTEIN_COMPLEX                               | -1.39 | 0.96 | 0 | 0 | 0 | not significant |
| 2342 | GO_POSITIVE_REGULATION_OF_MONONUCLEAR_CELL_MIGRATION             | -1.39 | 0.96 | 0 | 0 | 0 | not significant |
| 2343 | GO_GLUCOSE_BINDING                                               | -1.39 | 0.95 | 0 | 0 | 0 | not significant |
| 2344 | NAKAYAMA_FGF2_TARGETS                                            | -1.39 | 0.95 | 0 | 0 | 0 | not significant |
| 2345 | GO_POSITIVE_REGULATION_OF_PHOSPHOLIPID_BIOSYNTHETIC_PROCES       | -1.39 | 0.93 | 0 | 0 | 0 | not significant |
| 2346 | GO_PONUCLEUS                                                     | -1.39 | 0.93 | 0 | 0 | 0 | not significant |
| 2347 | GO_VESICLE_FUSION_WITH_ENDOPLASMIC_RETICULUM_GOLGI_INTERM        | -1.39 | 0.93 | 0 | 0 | 0 | not significant |
| 2348 | HO_LIVER_CANCER_VASCULAR_INVASION                                | -1.39 | 0.92 | 0 | 0 | 0 | not significant |
| 2349 | REACTOME_TRIGLYCERIDE_CATABOLISM                                 | -1.39 | 0.92 | 0 | 0 | 0 | not significant |
| 2350 | GO_PML_BODY_ORGANIZATION                                         | -1.39 | 0.91 | 0 | 0 | 0 | not significant |
| 2351 | GO_CYTOCHROME_B5_REDUCTASE_ACTIVITY_ACTING_ON_NAD_P_H            | -1.39 | 0.90 | 0 | 0 | 0 | not significant |
| 2352 | GO_SNRNA_MODIFICATION                                            | -1.39 | 0.90 | 0 | 0 | 0 | not significant |
| 2353 | REACTOME_TRANSLLOCATION_OF_ZAP_70_TO_IMMUNOLOGICAL_SYNA          | -1.39 | 0.89 | 0 | 0 | 0 | not significant |
| 2354 | GO_PYRIMIDINE_NUCLEOBASE_BIOSYNTHETIC_PROCESS                    | -1.39 | 0.86 | 0 | 0 | 0 | not significant |
| 2355 | BRUINS_UVC_RESPONSE_LATE                                         | -1.38 | 4.00 | 0 | 0 | 0 | not significant |
| 2356 | GO_CELLULAR_RESPONSE_TO_HORMONE_STIMULUS                         | -1.38 | 4.00 | 0 | 0 | 0 | not significant |
| 2357 | GO_DIVALENT_INORGANIC_CATION_TRANSPORT                           | -1.38 | 4.00 | 0 | 0 | 0 | not significant |
| 2358 | GO_REGULATION_OF_CELL_CYCLE_PHASE_TRANSITION                     | -1.38 | 4.00 | 0 | 0 | 0 | not significant |
| 2359 | GRYDER_PAX3FOXO1_ENHANCERS_IN_TADS                               | -1.38 | 4.00 | 0 | 0 | 0 | not significant |
| 2360 | KIM_ALL_DISORDERS_CALB1_CORR_UP                                  | -1.38 | 4.00 | 0 | 0 | 0 | not significant |
| 2361 | MARSONI_BOUND_BY_E2F4_UNSTIMULATED                               | -1.38 | 4.00 | 0 | 0 | 0 | not significant |
| 2362 | GO_ORGANIC_HYDROXY_COMPOUND_BIOSYNTHETIC_PROCESS                 | -1.38 | 2.49 | 0 | 0 | 0 | not significant |
| 2363 | GO_PHAGOCYTOSIS                                                  | -1.38 | 2.43 | 0 | 0 | 0 | not significant |
| 2364 | SMID_BREAST_CANCER_LUMINAL_B_DN                                  | -1.38 | 2.40 | 0 | 0 | 0 | not significant |
| 2365 | KIM_ALL_DISORDERS_DURATION_CORR_DN                               | -1.38 | 2.21 | 0 | 0 | 0 | not significant |
| 2366 | HALLMARK_MITOTIC_SPINDLE                                         | -1.38 | 1.73 | 0 | 0 | 0 | not significant |
| 2367 | GO_REGULATION_OF_VIRAL_LIFE_CYCLE                                | -1.38 | 1.70 | 0 | 0 | 0 | not significant |
| 2368 | GO_REGULATION_OF_CELL_DIVISION                                   | -1.38 | 1.69 | 0 | 0 | 0 | not significant |
| 2369 | P53_DN.V1_DN                                                     | -1.38 | 1.64 | 0 | 0 | 0 | not significant |
| 2370 | KEEN_RESPONSE_TO_ROSIGLITAZONE_DN                                | -1.38 | 1.61 | 0 | 0 | 0 | not significant |
| 2371 | KEGG_PURINE_METABOLISM                                           | -1.51 | 1.61 | 1 | 0 | 0 | Repressed       |
| 2372 | GO_CARBOHYDRATE_CATABOLIC_PROCESS                                | -1.38 | 1.58 | 0 | 0 | 0 | not significant |
| 2373 | REACTOME_FATTY_ACID_METABOLISM                                   | -1.38 | 1.58 | 0 | 0 | 0 | not significant |
| 2374 | GO CARBON OXYGEN LYASE ACTIVITY                                  | -1.38 | 1.38 | 0 | 0 | 0 | not significant |
| 2375 | JOHNSTONE_PARVB_TARGETS_2_UP                                     | -1.38 | 1.33 | 0 | 0 | 0 | not significant |
| 2376 | DORN_ADENOVIRUS_INFECTION_24HR_DN                                | -1.38 | 1.28 | 0 | 0 | 0 | not significant |
| 2377 | ZAMORA_NOS2_TARGETS_DN                                           | -1.38 | 1.27 | 0 | 0 | 0 | not significant |
| 2378 | GO_REGULATION_OF_PEPTIDYL_THREONINE_PHOSPHORYLATION              | -1.38 | 1.26 | 0 | 0 | 0 | not significant |
| 2379 | GO_ANTIOXIDANT_ACTIVITY                                          | -1.38 | 1.24 | 0 | 0 | 0 | not significant |
| 2380 | GO_TELOMERIC_DNA_BINDING                                         | -1.38 | 1.22 | 0 | 0 | 0 | not significant |
| 2381 | PEDERSEN_METASTASIS_BY_ERBB2_ISOFORM_4                           | -1.38 | 1.22 | 0 | 0 | 0 | not significant |
| 2382 | DOANE_BREAST_CANCER_CLASSES_UP                                   | -1.38 | 1.21 | 0 | 0 | 0 | not significant |
| 2383 | CHR15Q22                                                         | -1.38 | 1.19 | 0 | 0 | 0 | not significant |
| 2384 | HU_GENOTOXIC_DAMAGE_24HR                                         | -1.38 | 1.19 | 0 | 0 | 0 | not significant |
| 2385 | CHIBA_RESPONSE_TO_TSA                                            | -1.38 | 1.13 | 0 | 0 | 0 | not significant |
| 2386 | SU_PANCREAS                                                      | -1.38 | 1.13 | 0 | 0 | 0 | not significant |

|      |                                                                |       |      |   |   |   |                 |
|------|----------------------------------------------------------------|-------|------|---|---|---|-----------------|
| 2387 | ONGUSAHA_TP53_TARGETS                                          | -1.38 | 1.09 | 0 | 0 | 0 | not significant |
| 2388 | GO_STEROID_HORMONE_RECEPTOR_ACTIVITY                           | -1.38 | 1.08 | 0 | 0 | 0 | not significant |
| 2389 | REACTOME_PYRUVATE_METABOLISM                                   | -1.38 | 1.08 | 0 | 0 | 0 | not significant |
| 2390 | GO_SIGNAL_SEQUENCE_BINDING                                     | -1.38 | 1.07 | 0 | 0 | 0 | not significant |
| 2391 | GO_PINOCYTOSIS                                                 | -1.38 | 1.06 | 0 | 0 | 0 | not significant |
| 2392 | GO_FEEDING_BEHAVIOR                                            | -1.38 | 1.05 | 0 | 0 | 0 | not significant |
| 2393 | GO_POSITIVE_REGULATION_OF_LIPID_LOCALIZATION                   | -1.38 | 1.05 | 0 | 0 | 0 | not significant |
| 2394 | IZUKA_LIVER_CANCER_PROGRESSION_G1_G2_DN                        | -1.38 | 1.05 | 0 | 0 | 0 | not significant |
| 2395 | LAMB_CCOND1_TARGETS                                            | -1.38 | 1.04 | 0 | 0 | 0 | not significant |
| 2396 | PID_SYNDECAN_2_PATHWAY                                         | -1.38 | 1.04 | 0 | 0 | 0 | not significant |
| 2397 | GO_NEGATIVE_REGULATION_OF_EXOCYTOSIS                           | -1.38 | 1.03 | 0 | 0 | 0 | not significant |
| 2398 | HOUSTIS_ROS                                                    | -1.38 | 1.03 | 0 | 0 | 0 | not significant |
| 2399 | GO_ATP_BIOSYNTHETIC_PROCESS                                    | -1.38 | 1.02 | 0 | 0 | 0 | not significant |
| 2400 | GO_NEUROMUSCULAR_PROCESS_CONTROLLING_BALANCE                   | -1.38 | 1.02 | 0 | 0 | 0 | not significant |
| 2401 | SEIDEN_MET_SIGNALING                                           | -1.38 | 1.02 | 0 | 0 | 0 | not significant |
| 2402 | GO_ENTRAINMENT_OF_CIRCADIAN_CLOCK_BY_PHOTOPERIOD               | -1.38 | 1.01 | 0 | 0 | 0 | not significant |
| 2403 | GO_MRNA_MODIFICATION                                           | -1.38 | 1.01 | 0 | 0 | 0 | not significant |
| 2404 | GO_PORE_COMPLEX                                                | -1.38 | 1.00 | 0 | 0 | 0 | not significant |
| 2405 | GO_ORGAN_OR_TISSUE_SPECIFIC_IMMUNE_RESPONSE                    | -1.38 | 0.99 | 0 | 0 | 0 | not significant |
| 2406 | NOUSHMEHR_GBM_SOMATIC_MUTATED                                  | -1.38 | 0.99 | 0 | 0 | 0 | not significant |
| 2407 | CHR2Q36                                                        | -1.38 | 0.98 | 0 | 0 | 0 | not significant |
| 2408 | GO_FACE_MORPHOGENESIS                                          | -1.38 | 0.98 | 0 | 0 | 0 | not significant |
| 2409 | NIKOLSKY_BREAST_CANCER_5P15_AMPLICON                           | -1.38 | 0.98 | 0 | 0 | 0 | not significant |
| 2410 | GO_POSITIVE_REGULATION_OF_TRANSCRIPTION_FROM_RNA_POLYMERASE    | -1.38 | 0.97 | 0 | 0 | 0 | not significant |
| 2411 | GO_REGULATION_OF_RNA_POLYMERASE_II_TRANSCRIPTION_PREINITIATION | -1.38 | 0.97 | 0 | 0 | 0 | not significant |
| 2412 | GO_NEGATIVE_REGULATION_OF_ENDOPLASMIC_RETICULUM_STRESS_II      | -1.38 | 0.96 | 0 | 0 | 0 | not significant |
| 2413 | GO_NUCLEOLUS_ORGANIZATION                                      | -1.38 | 0.96 | 0 | 0 | 0 | not significant |
| 2414 | GO_RENAL_SYSTEM_VASCULATURE_DEVELOPMENT                        | -1.38 | 0.95 | 0 | 0 | 0 | not significant |
| 2415 | REACTOME_GDP_FUCOSE_BIOSYNTHESIS                               | -1.38 | 0.95 | 0 | 0 | 0 | not significant |
| 2416 | STONER_ESOPHAGEAL_CARCINOGENESIS_DN                            | -1.38 | 0.95 | 0 | 0 | 0 | not significant |
| 2417 | GO_POSITIVE_REGULATION_OF_VACUOLE_ORGANIZATION                 | -1.38 | 0.94 | 0 | 0 | 0 | not significant |
| 2418 | GO_DNA_TOPOISOMERASE_ACTIVITY                                  | -1.38 | 0.93 | 0 | 0 | 0 | not significant |
| 2419 | GO_REGULATION_OF_SYSTEMIC_ARTERIAL_BLOOD_PRESSURE_BY_CIF       | -1.38 | 0.93 | 0 | 0 | 0 | not significant |
| 2420 | PID_CONE_PATHWAY                                               | -1.38 | 0.92 | 0 | 0 | 0 | not significant |
| 2421 | GO_CATION_TRANSPORTING_ATPASE_COMPLEX                          | -1.38 | 0.91 | 0 | 0 | 0 | not significant |
| 2422 | GO_INTESTINAL_ABSORPTION                                       | -1.38 | 0.91 | 0 | 0 | 0 | not significant |
| 2423 | GO_TYPE_I_INTERFERON_BIOSYNTHETIC_PROCESS                      | -1.38 | 0.91 | 0 | 0 | 0 | not significant |
| 2424 | REACTOME_CREB1_PHOSPHORYLATION_THROUGH_THE_ACTIVATION_C        | -1.38 | 0.91 | 0 | 0 | 0 | not significant |
| 2425 | REACTOME_TELOMERE_EXTENSION_BY_TELOMERASE                      | -1.38 | 0.91 | 0 | 0 | 0 | not significant |
| 2426 | GO_ENOYL_COA_HYDRATASE_ACTIVITY                                | -1.38 | 0.90 | 0 | 0 | 0 | not significant |
| 2427 | GO_FATTY_ACID_BINDING                                          | -1.38 | 0.89 | 0 | 0 | 0 | not significant |
| 2428 | GO_ALKALI_METAL_ION_BINDING                                    | -1.38 | 0.88 | 0 | 0 | 0 | not significant |
| 2429 | GO_REGULATION_OF_ISOMERASE_ACTIVITY                            | -1.38 | 0.88 | 0 | 0 | 0 | not significant |
| 2430 | REACTOME_CLEC7A_DECTIN_1_INDUCES_NFAT_ACTIVATION               | -1.38 | 0.88 | 0 | 0 | 0 | not significant |
| 2431 | GO_U4_SNRNP                                                    | -1.38 | 0.87 | 0 | 0 | 0 | not significant |
| 2432 | REACTOME_DNA_DAMAGE_REVERSAL                                   | -1.38 | 0.87 | 0 | 0 | 0 | not significant |
| 2433 | GO_GLOMERULAR_MESANGIUM_DEVELOPMENT                            | -1.38 | 0.81 | 0 | 0 | 0 | not significant |
| 2434 | GO_ADENYL_NUCLEOTIDE_BINDING                                   | -1.37 | 4.00 | 0 | 0 | 0 | not significant |
| 2435 | GO_ATPASE_ACTIVITY_COUPLED                                     | -1.37 | 4.00 | 0 | 0 | 0 | not significant |
| 2436 | GO_HOMEOSTATIC_PROCESS                                         | -1.37 | 4.00 | 0 | 0 | 0 | not significant |
| 2437 | GO_POSITIVE_REGULATION_OF_IMMUNE_RESPONSE                      | -1.37 | 4.00 | 0 | 0 | 0 | not significant |
| 2438 | GO_REGULATION_OF_IMMUNE_RESPONSE                               | -1.37 | 4.00 | 0 | 0 | 0 | not significant |
| 2439 | REACTOME_METABOLISM_OF_CARBOHYDRATES                           | -1.37 | 4.00 | 0 | 0 | 0 | not significant |
| 2440 | MITSIADIS_RESPONSE_TO_APLIDIN_DN                               | -1.37 | 1.92 | 0 | 0 | 0 | not significant |
| 2441 | HALLMARK_IL2_STAT5_SIGNALING                                   | -1.37 | 1.80 | 0 | 0 | 0 | not significant |
| 2442 | DOANE_RESPONSE_TO_ANDROGEN_UP                                  | -1.37 | 1.75 | 0 | 0 | 0 | not significant |
| 2443 | GO_RESPONSE_TO_NUTRIENT                                        | -1.37 | 1.73 | 0 | 0 | 0 | not significant |
| 2444 | GO_SPINDLE_ORGANIZATION                                        | -1.37 | 1.73 | 0 | 0 | 0 | not significant |
| 2445 | HAMAI_APOPTOSIS_VIA_TRAIL_DN                                   | -1.37 | 1.73 | 0 | 0 | 0 | not significant |
| 2446 | GO_NEGATIVE_REGULATION_OF_BINDING                              | -1.37 | 1.70 | 0 | 0 | 0 | not significant |
| 2447 | GO_STEM_CELL_DIFFERENTIATION                                   | -1.37 | 1.69 | 0 | 0 | 0 | not significant |
| 2448 | GO_RENAL_SYSTEM_DEVELOPMENT                                    | -1.37 | 1.64 | 0 | 0 | 0 | not significant |
| 2449 | LEE_EARLY_T_LYMPHOCYTE_UP                                      | -1.37 | 1.64 | 0 | 0 | 0 | not significant |
| 2450 | REACTOME_RNA_POLYMERASE_I_TRANSCRIPTION                        | -1.37 | 1.63 | 0 | 0 | 0 | not significant |
| 2451 | SCHAEFFER_PROSTATE_DEVELOPMENT_6HR_UP                          | -1.37 | 1.56 | 0 | 0 | 0 | not significant |
| 2452 | E2F3_UP.V1_DN                                                  | -1.37 | 1.44 | 0 | 0 | 0 | not significant |
| 2453 | GO_REGULATION_OF_TRANSLATIONAL_INITIATION                      | -1.37 | 1.42 | 0 | 0 | 0 | not significant |
| 2454 | MCCLUNG_CREB1_TARGETS_UP                                       | -1.37 | 1.30 | 0 | 0 | 0 | not significant |
| 2455 | GO_REGULATION_OF_WOUND_HEALING                                 | -1.37 | 1.27 | 0 | 0 | 0 | not significant |
| 2456 | GO_MACROPHAGE_ACTIVATION                                       | -1.37 | 1.22 | 0 | 0 | 0 | not significant |
| 2457 | BURTON_ADIPOGENESIS_2                                          | -1.37 | 1.18 | 0 | 0 | 0 | not significant |
| 2458 | GO_BASAL_TRANSCRIPTION_MACHINERY_BINDING                       | -1.37 | 1.17 | 0 | 0 | 0 | not significant |
| 2459 | WARTERS_IR_RESPONSE_5GY                                        | -1.37 | 1.15 | 0 | 0 | 0 | not significant |
| 2460 | GO_MRNA_CIS_SPLICING_VIA_SPLICEOSOME                           | -1.37 | 1.13 | 0 | 0 | 0 | not significant |
| 2461 | GO_PLATELET_AGGREGATION                                        | -1.37 | 1.10 | 0 | 0 | 0 | not significant |
| 2462 | VILLANUEVA_LIVER_CANCER_KRT19_DN                               | -1.37 | 1.10 | 0 | 0 | 0 | not significant |
| 2463 | GO_ESTABLISHMENT_OF_PROTEIN_LOCALIZATION_TO_TELOMERE           | -1.37 | 1.09 | 0 | 0 | 0 | not significant |
| 2464 | GO_POSITIVE_REGULATION_OF_LIPID_TRANSPORT                      | -1.37 | 1.07 | 0 | 0 | 0 | not significant |
| 2465 | GO_REGULATION_OF_CELLULAR_RESPIRATION                          | -1.37 | 1.05 | 0 | 0 | 0 | not significant |
| 2466 | REACTOME_TP53_REGULATES_TRANSCRIPTION_OF_GENES_INVOLVED        | -1.37 | 1.05 | 0 | 0 | 0 | not significant |
| 2467 | GO_REGULATION_OF_T_CELL_CHEMOTAXIS                             | -1.37 | 1.04 | 0 | 0 | 0 | not significant |
| 2468 | GO_CALCIIUM_CHANNEL_REGULATOR_ACTIVITY                         | -1.37 | 1.03 | 0 | 0 | 0 | not significant |
| 2469 | GO_REGULATION_OF_MITOCHONDRIAL_TRANSLATION                     | -1.37 | 1.03 | 0 | 0 | 0 | not significant |
| 2470 | BYSTRYKH_HEMATOPOIESIS_STEM_CELL_SCP2_QTL_TRANS                | -1.37 | 1.02 | 0 | 0 | 0 | not significant |
| 2471 | GO_ESTABLISHMENT_OF_PROTEIN_LOCALIZATION_TO_CHROMOSOME         | -1.37 | 1.01 | 0 | 0 | 0 | not significant |
| 2472 | GO_LAMELLIPODIUM_MORPHOGENESIS                                 | -1.37 | 1.01 | 0 | 0 | 0 | not significant |
| 2473 | GO_PROTEIN_LOCALIZATION_TO_CHROMOSOME_TELOMERIC_REGION         | -1.37 | 1.01 | 0 | 0 | 0 | not significant |
| 2474 | JOSEPH_RESPONSE_TO_SODIUM_BUTYRATE_UP                          | -1.37 | 1.01 | 0 | 0 | 0 | not significant |
| 2475 | GO_REGULATION_OF_MYELINATION                                   | -1.37 | 1.00 | 0 | 0 | 0 | not significant |
| 2476 | GO_MHC_CLASS_I_PEPTIDE_LOADING_COMPLEX                         | -1.37 | 0.99 | 0 | 0 | 0 | not significant |
| 2477 | GO_NEGATIVE_REGULATION_OF_DENDRITE_DEVELOPMENT                 | -1.37 | 0.99 | 0 | 0 | 0 | not significant |
| 2478 | GO_BRANCHED_CHAIN_AMINO_ACID_CATABOLIC_PROCESS                 | -1.37 | 0.98 | 0 | 0 | 0 | not significant |
| 2479 | GO_REGULATION_OF_MACROPHAGE_ACTIVATION                         | -1.37 | 0.97 | 0 | 0 | 0 | not significant |
| 2480 | GO_CENTROSOME_SEPARATION                                       | -1.37 | 0.96 | 0 | 0 | 0 | not significant |
| 2481 | GO_OXIDOREDUCTASE_ACTIVITY_ACTING_ON_THE_CH_CH_GROUP_OF        | -1.37 | 0.96 | 0 | 0 | 0 | not significant |
| 2482 | TERAO_AOX4_TARGETS_SKIN_DN                                     | -1.37 | 0.96 | 0 | 0 | 0 | not significant |
| 2483 | GO_HAIR_CELL_DIFFERENTIATION                                   | -1.37 | 0.95 | 0 | 0 | 0 | not significant |
| 2484 | GO_TRNA_WOBBLE_BASE_MODIFICATION                               | -1.37 | 0.95 | 0 | 0 | 0 | not significant |
| 2485 | GO_VASCULAR_ENDOTHELIAL_GROWTH_FACTOR_RECEPTOR_BINDING         | -1.37 | 0.95 | 0 | 0 | 0 | not significant |
| 2486 | MOOHTA_GLYCOGEN_METABOLISM                                     | -1.37 | 0.95 | 0 | 0 | 0 | not significant |
| 2487 | BIOCARTA_NO1_PATHWAY                                           | -1.37 | 0.94 | 0 | 0 | 0 | not significant |
| 2488 | GO_POSITIVE_REGULATION_OF_CARTILAGE_DEVELOPMENT                | -1.37 | 0.94 | 0 | 0 | 0 | not significant |
| 2489 | GO_RIBOSOMAL_SMALL_SUBUNIT_BINDING                             | -1.37 | 0.94 | 0 | 0 | 0 | not significant |
| 2490 | GO_U4_SNRNA_BINDING                                            | -1.37 | 0.94 | 0 | 0 | 0 | not significant |
| 2491 | THUM_MIR21_TARGETS_HEART_DISEASE_DN                            | -1.37 | 0.93 | 0 | 0 | 0 | not significant |
| 2492 | GO_REGULATION_OF_SYSTEMIC_ARTERIAL_BLOOD_PRESSURE_BY_RE        | -1.37 | 0.92 | 0 | 0 | 0 | not significant |
| 2493 | GO_RNA_POLYMERASE_I_COMPLEX                                    | -1.37 | 0.92 | 0 | 0 | 0 | not significant |
| 2494 | ZHAN_MULTIPLE_MYELOMA_SPIKED                                   | -1.37 | 0.92 | 0 | 0 | 0 | not significant |
| 2495 | GO_CARDIOBLAST_PROLIFERATION                                   | -1.37 | 0.91 | 0 | 0 | 0 | not significant |



|      |                                                             |       |      |   |   |   |                 |
|------|-------------------------------------------------------------|-------|------|---|---|---|-----------------|
| 2496 | GO_COMMITMENT_COMPLEX                                       | -1.37 | 0.90 | 0 | 0 | 0 | not significant |
| 2497 | GO_PHOSPHATIDYLINOSITOL_3_KINASE_REGULATORY_SUBUNIT_BINDING | -1.37 | 0.90 | 0 | 0 | 0 | not significant |
| 2498 | GO_EMBRYONIC_CAMERA_TYPE_EYE_FORMATION                      | -1.37 | 0.89 | 0 | 0 | 0 | not significant |
| 2499 | GO_POSITIVE_REGULATION_OF_RNA_POLYMERASE_II_TRANSCRIPTION   | -1.37 | 0.89 | 0 | 0 | 0 | not significant |
| 2500 | CHEN_ETV5_TARGETS_SERTOLI                                   | -1.37 | 0.88 | 0 | 0 | 0 | not significant |
| 2501 | GO_PEPTIDE_HORMONE_PROCESSING                               | -1.37 | 0.87 | 0 | 0 | 0 | not significant |
| 2502 | GO_TRNA_CYTOSINE_5_METHYLTRANSFERASE_ACTIVITY               | -1.37 | 0.87 | 0 | 0 | 0 | not significant |
| 2503 | MIKKELSEN_ES_ICP_WITH_H3K27ME3                              | -1.37 | 0.87 | 0 | 0 | 0 | not significant |
| 2504 | GO_NEGATIVE_REGULATION_OF_MACROPHAGE_ACTIVATION             | -1.37 | 0.86 | 0 | 0 | 0 | not significant |
| 2505 | FEVR_CTNNB1_TARGETS_DN                                      | -1.36 | 4.00 | 0 | 0 | 0 | not significant |
| 2506 | GO_NEGATIVE_REGULATION_OF_CELL_CYCLE_PROCESS                | -1.36 | 4.00 | 0 | 0 | 0 | not significant |
| 2507 | GO_REGULATION_OF_INNATE_IMMUNE_RESPONSE                     | -1.36 | 4.00 | 0 | 0 | 0 | not significant |
| 2508 | GO_RESPONSE_TO_NITROGEN_COMPOUND                            | -1.36 | 4.00 | 0 | 0 | 0 | not significant |
| 2509 | GO_RIBONUCLEOTIDE_BINDING                                   | -1.36 | 4.00 | 0 | 0 | 0 | not significant |
| 2510 | HAMA1_APOPTOSIS_VIA_TRAIL_UP                                | -1.36 | 4.00 | 0 | 0 | 0 | not significant |
| 2511 | KIM_BIPOLAR_DISORDER_OLIGODENDROCYTE_DENSITY_CORR_UP        | -1.36 | 4.00 | 0 | 0 | 0 | not significant |
| 2512 | PATIL_LIVER_CANCER                                          | -1.36 | 4.00 | 0 | 0 | 0 | not significant |
| 2513 | REACTOME_INFECTIOUS_DISEASE                                 | -1.36 | 4.00 | 0 | 0 | 0 | not significant |
| 2514 | REACTOME_TRANSPORT_OF_SMALL_MOLECULES                       | -1.36 | 4.00 | 0 | 0 | 0 | not significant |
| 2515 | NABA_MATRISOME                                              | -1.36 | 1.91 | 0 | 0 | 0 | not significant |
| 2516 | VERHAAK_GLIOMASTOMA_MESENCHYMAL                             | -1.36 | 1.86 | 0 | 0 | 0 | not significant |
| 2517 | UEDA_PERIPHERAL_CLOCK                                       | -1.36 | 1.74 | 0 | 0 | 0 | not significant |
| 2518 | MARKEY_RB1_ACUTE_LOF_DN                                     | -1.36 | 1.61 | 0 | 0 | 0 | not significant |
| 2519 | CHR11P15                                                    | -1.36 | 1.60 | 0 | 0 | 0 | not significant |
| 2520 | GO_RESPONSE_TO_ACID_CHEMICAL                                | -1.36 | 1.60 | 0 | 0 | 0 | not significant |
| 2521 | GO_PEPTIDE_BINDING                                          | -1.36 | 1.59 | 0 | 0 | 0 | not significant |
| 2522 | CHEMNITZ_RESPONSE_TO_PROSTAGLANDIN_E2_UP                    | -1.36 | 1.55 | 0 | 0 | 0 | not significant |
| 2523 | GO_KINETOCHORE                                              | -1.36 | 1.54 | 0 | 0 | 0 | not significant |
| 2524 | OISHI_CHOLANGIOMA_STEM_CELL_LIKE_DN                         | -1.36 | 1.53 | 0 | 0 | 0 | not significant |
| 2525 | GO_CIRCADIAN_RHYTHM                                         | -1.36 | 1.50 | 0 | 0 | 0 | not significant |
| 2526 | REACTOME_PROTEIN_UBIQUITINATION                             | -1.36 | 1.48 | 0 | 0 | 0 | not significant |
| 2527 | GO_REGULATION_OF_CATION_CHANNEL_ACTIVITY                    | -1.36 | 1.46 | 0 | 0 | 0 | not significant |
| 2528 | JIANG_HYPOXIA_CANCER                                        | -1.36 | 1.35 | 0 | 0 | 0 | not significant |
| 2529 | REACTOME_DISEASES_OF_GLYCOSYLATION                          | -1.36 | 1.30 | 0 | 0 | 0 | not significant |
| 2530 | GO_CELL_DEATH_IN_RESPONSE_TO_OXIDATIVE_STRESS               | -1.36 | 1.29 | 0 | 0 | 0 | not significant |
| 2531 | GO_METAPHASE_PLATE_CONGRESSION                              | -1.36 | 1.22 | 0 | 0 | 0 | not significant |
| 2532 | GO_ALPHA_AMINO_ACID_CATABOLIC_PROCESS                       | -1.36 | 1.21 | 0 | 0 | 0 | not significant |
| 2533 | GO_CELLULAR_RESPONSE_TO_AMMONIUM_ION                        | -1.36 | 1.17 | 0 | 0 | 0 | not significant |
| 2534 | PID_RAS_PATHWAY                                             | -1.36 | 1.14 | 0 | 0 | 0 | not significant |
| 2535 | GO_NEGATIVE_REGULATION_OF_ERK1_AND_ERK2_CASCADE             | -1.36 | 1.13 | 0 | 0 | 0 | not significant |
| 2536 | GO_TRANSCRIPTION_INITIATION_FROM_RNA_POLYMERASE_I_PROMOTE   | -1.36 | 1.13 | 0 | 0 | 0 | not significant |
| 2537 | TBK1.DN48HRS_UP                                             | -1.36 | 1.12 | 0 | 0 | 0 | not significant |
| 2538 | GO_CELLULAR_RESPONSE_TO_GLUCOSE_STARVATION                  | -1.36 | 1.09 | 0 | 0 | 0 | not significant |
| 2539 | ZHANG_ANTIVIRAL_RESPONSE_TO_RIBAVIRIN_DN                    | -1.36 | 1.08 | 0 | 0 | 0 | not significant |
| 2540 | DAVICIONI_RHABDOMYOSARCOMA_PAX_FOXO1_FUSION_UP              | -1.36 | 1.07 | 0 | 0 | 0 | not significant |
| 2541 | GO_NEUTRAL_AMINO_ACID_TRANSPORT                             | -1.36 | 1.06 | 0 | 0 | 0 | not significant |
| 2542 | GO_REGULATION_OF_ATTACHMENT_OF_SPINDLE_MICROTUBULES_TO      | -1.36 | 1.05 | 0 | 0 | 0 | not significant |
| 2543 | SASAI_RESISTANCE_TO_NEOPLASTIC_TRANSFORMATION               | -1.36 | 1.02 | 0 | 0 | 0 | not significant |
| 2544 | EPPERT_CE_HSC_LSC                                           | -1.36 | 1.01 | 0 | 0 | 0 | not significant |
| 2545 | GO_COPPER_ION_TRANSPORT                                     | -1.36 | 0.98 | 0 | 0 | 0 | not significant |
| 2546 | GO_T_CELL_RECEPTOR_COMPLEX                                  | -1.36 | 0.98 | 0 | 0 | 0 | not significant |
| 2547 | GO_INTERFERON_ALPHA_PRODUCTION                              | -1.36 | 0.96 | 0 | 0 | 0 | not significant |
| 2548 | REACTOME_GLUTATHIONE_CONJUGATION                            | -1.36 | 0.96 | 0 | 0 | 0 | not significant |
| 2549 | REACTOME_PHOSPHORYLATION_SITE_MUTANTS_OF_CTNNB1_ARE_NO1     | -1.36 | 0.95 | 0 | 0 | 0 | not significant |
| 2550 | ALONSO_METASTASIS_EMT_UP                                    | -1.36 | 0.93 | 0 | 0 | 0 | not significant |
| 2551 | GAZDA_DIAMOND_BLACKFAN_ANEMIA_ERYTHROID_UP                  | -1.36 | 0.93 | 0 | 0 | 0 | not significant |
| 2552 | GO_REGULATION_OF_MACROPHAGE_DERIVED_FOAM_CELL_DIFFERENTI    | -1.36 | 0.93 | 0 | 0 | 0 | not significant |
| 2553 | MIKKELSEN_MEF_LCP_WITH_H3K27ME3                             | -1.36 | 0.93 | 0 | 0 | 0 | not significant |
| 2554 | GO_EMBRYONIC_HINDLIMB_MORPHOGENESIS                         | -1.36 | 0.92 | 0 | 0 | 0 | not significant |
| 2555 | KEGG_TRYPTOPHAN_METABOLISM                                  | -1.36 | 0.92 | 0 | 0 | 0 | not significant |
| 2556 | STOSSI_RESPONSE_TO ESTRADIOL                                | -1.36 | 0.92 | 0 | 0 | 0 | not significant |
| 2557 | GLINSKY_CANCER_DEATH_UP                                     | -1.36 | 0.91 | 0 | 0 | 0 | not significant |
| 2558 | GO_NEGATIVE_REGULATION_OF_PEPTIDYL_THREONINE_PHOSPHORYLA    | -1.36 | 0.91 | 0 | 0 | 0 | not significant |
| 2559 | CHR5Q32                                                     | -1.36 | 0.90 | 0 | 0 | 0 | not significant |
| 2560 | GO_MAINTENANCE_OF_ORGANELLE_LOCATION                        | -1.36 | 0.90 | 0 | 0 | 0 | not significant |
| 2561 | REACTOME_CYTOSOLIC_SULFONATION_OF_SMALL_MOLECULES           | -1.36 | 0.90 | 0 | 0 | 0 | not significant |
| 2562 | REACTOME_SYNTHESIS_OF_BILE_ACIDS_AND_BILE_SALTS_VIA_7ALPHA  | -1.36 | 0.90 | 0 | 0 | 0 | not significant |
| 2563 | GO_APOPTOTIC_DNA_FRAGMENTATION                              | -1.36 | 0.89 | 0 | 0 | 0 | not significant |
| 2564 | GO_NEGATIVE_REGULATION_OF_LIPASE_ACTIVITY                   | -1.36 | 0.89 | 0 | 0 | 0 | not significant |
| 2565 | IZUKA_LIVER_CANCER_PROGRESSION_L0_L1_DN                     | -1.36 | 0.89 | 0 | 0 | 0 | not significant |
| 2566 | REACTOME_CALCINEURIN_ACTIVATES_NFAT                         | -1.36 | 0.89 | 0 | 0 | 0 | not significant |
| 2567 | GO_PYRUVATE_DEHYDROGENASE_ACTIVITY                          | -1.36 | 0.88 | 0 | 0 | 0 | not significant |
| 2568 | GO_ASTROCYTE_PROJECTION                                     | -1.36 | 0.87 | 0 | 0 | 0 | not significant |
| 2569 | GO_CELLULAR_RESPONSE_TO_NICOTINE                            | -1.36 | 0.87 | 0 | 0 | 0 | not significant |
| 2570 | GO_INDUCTION_OF_POSITIVE_CHEMOTAXIS                         | -1.36 | 0.87 | 0 | 0 | 0 | not significant |
| 2571 | GO_DE_NOVO_IMP_BIOSYNTHETIC_PROCESS                         | -1.36 | 0.86 | 0 | 0 | 0 | not significant |
| 2572 | LEI_HOXC8_TARGETS_DN                                        | -1.36 | 0.86 | 0 | 0 | 0 | not significant |
| 2573 | GO_ESTABLISHMENT_OF_EPITHELIAL_CELL_APICAL_BASAL_POLARITY   | -1.36 | 0.85 | 0 | 0 | 0 | not significant |
| 2574 | GO_TROPHOBLAST_CELL_MIGRATION                               | -1.36 | 0.85 | 0 | 0 | 0 | not significant |
| 2575 | GO_AMIDINE_LYASE_ACTIVITY                                   | -1.36 | 0.84 | 0 | 0 | 0 | not significant |
| 2576 | GO_POSITIVE_REGULATION_OF_CELLULAR_EXTRAVASATION            | -1.36 | 0.83 | 0 | 0 | 0 | not significant |
| 2577 | REACTOME_G_PROTEIN_GATED_POTASSIUM_CHANNELS                 | -1.36 | 0.81 | 0 | 0 | 0 | not significant |
| 2578 | GO_POSITIVE_REGULATION_OF_IMMUNE_SYSTEM_PROCESS             | -1.35 | 4.00 | 0 | 0 | 0 | not significant |
| 2579 | GO_REGULATION_OF_PROTEOLYSIS                                | -1.35 | 4.00 | 0 | 0 | 0 | not significant |
| 2580 | GO_PROTEIN_DEPHOSPHORYLATION                                | -1.35 | 2.41 | 0 | 0 | 0 | not significant |
| 2581 | REACTOME_CLASS_II_MHC_MEDIATED_ANTIGEN_PROCESSING_PRESENT   | -1.35 | 2.35 | 0 | 0 | 0 | not significant |
| 2582 | GO_CELLULAR_RESPONSE_TO_LIPID                               | -1.35 | 2.31 | 0 | 0 | 0 | not significant |
| 2583 | REACTOME_NEUTROPHIL_DEGRANULATION                           | -1.35 | 2.30 | 0 | 0 | 0 | not significant |
| 2584 | NFE2L2.V2                                                   | -1.35 | 2.16 | 0 | 0 | 0 | not significant |
| 2585 | GO_CELL_CORTEX                                              | -1.35 | 2.12 | 0 | 0 | 0 | not significant |
| 2586 | GO_PHOSPHATASE_ACTIVITY                                     | -1.35 | 1.85 | 0 | 0 | 0 | not significant |
| 2587 | GO_MUSCLE_CONTRACTION                                       | -1.35 | 1.63 | 0 | 0 | 0 | not significant |
| 2588 | GO_EXTERNAL_SIDE_OF_PLASMA_MEMBRANE                         | -1.35 | 1.51 | 0 | 0 | 0 | not significant |
| 2589 | GO_NEGATIVE_REGULATION_OF_SECRETION                         | -1.35 | 1.51 | 0 | 0 | 0 | not significant |
| 2590 | AKT_UP.V1_UP                                                | -1.35 | 1.49 | 0 | 0 | 0 | not significant |
| 2591 | GO_LEARNING                                                 | -1.35 | 1.48 | 0 | 0 | 0 | not significant |
| 2592 | DER_IFN_BETA_RESPONSE_UP                                    | -1.35 | 1.46 | 0 | 0 | 0 | not significant |
| 2593 | SENESE_HDAC2_TARGETS_UP                                     | -1.35 | 1.46 | 0 | 0 | 0 | not significant |
| 2594 | RUIZ_TNC_TARGETS_DN                                         | -1.35 | 1.43 | 0 | 0 | 0 | not significant |
| 2595 | WANG_ESOPHAGUS_CANCER_VS_NORMAL_UP                          | -1.35 | 1.37 | 0 | 0 | 0 | not significant |
| 2596 | GO_CHROMOSOME_LOCALIZATION                                  | -1.35 | 1.31 | 0 | 0 | 0 | not significant |
| 2597 | APRELIKOVA_BRCA1_TARGETS                                    | -1.35 | 1.20 | 0 | 0 | 0 | not significant |
| 2598 | GO_TRANSCRIPTION_BY_RNA_POLYMERASE_III                      | -1.35 | 1.18 | 0 | 0 | 0 | not significant |
| 2599 | LEE_LIVER_CANCER_MYC_TGFA_UP                                | -1.35 | 1.15 | 0 | 0 | 0 | not significant |
| 2600 | GO_MUSCLE_HYPERTROPHY                                       | -1.35 | 1.13 | 0 | 0 | 0 | not significant |
| 2601 | GO_PEPTIDYL_PROLINE_MODIFICATION                            | -1.35 | 1.12 | 0 | 0 | 0 | not significant |
| 2602 | GO_CARGO_RECEPTOR_ACTIVITY                                  | -1.35 | 1.11 | 0 | 0 | 0 | not significant |
| 2603 | NATSUME_RESPONSE_TO_INTERFERON_BETA_DN                      | -1.35 | 1.11 | 0 | 0 | 0 | not significant |
| 2604 | PID_CDC42_REG_PATHWAY                                       | -1.35 | 1.11 | 0 | 0 | 0 | not significant |

|      |                                                            |       |      |   |   |   |                 |
|------|------------------------------------------------------------|-------|------|---|---|---|-----------------|
| 2605 | GO_PLASMA_LIPOPROTEIN_PARTICLE_CLEARANCE                   | -1.35 | 1.09 | 0 | 0 | 0 | not significant |
| 2606 | MCBRYAN_PUBERTAL_BREAST_6_7WK_DN                           | -1.35 | 1.08 | 0 | 0 | 0 | not significant |
| 2607 | WHITEHURST_PACLITAXEL_SENSITIVITY                          | -1.35 | 1.08 | 0 | 0 | 0 | not significant |
| 2608 | GO_PEPTIDE_TRANSMEMBRANE_TRANSPORTER_ACTIVITY              | -1.35 | 1.06 | 0 | 0 | 0 | not significant |
| 2609 | YAMASHITA_LIVER_CANCER_STEM_CELL_DN                        | -1.35 | 1.04 | 0 | 0 | 0 | not significant |
| 2610 | GO_CLEAVAGE_INVOLVED_IN_RRNA_PROCESSING                    | -1.35 | 1.01 | 0 | 0 | 0 | not significant |
| 2611 | GO_INNER_EAR_AUDITORY_RECEPTOR_CELL_DIFFERENTIATION        | -1.35 | 0.99 | 0 | 0 | 0 | not significant |
| 2612 | CAFFAREL_RESPONSE_TO_THC_DN                                | -1.35 | 0.98 | 0 | 0 | 0 | not significant |
| 2613 | GO_CONDENSED_NUCLEAR_CHROMOSOME_CENTROMERIC_REGION         | -1.35 | 0.98 | 0 | 0 | 0 | not significant |
| 2614 | NIELSEN_SYNOVIAL_SARCOMA_DN                                | -1.35 | 0.98 | 0 | 0 | 0 | not significant |
| 2615 | REACTOME_G_PROTEIN_BETA_GAMMA_SIGNALING                    | -1.35 | 0.97 | 0 | 0 | 0 | not significant |
| 2616 | GO_CELL_DIFFERENTIATION_INVOLVED_IN_KIDNEY_DEVELOPMENT     | -1.35 | 0.95 | 0 | 0 | 0 | not significant |
| 2617 | GO_HISTONE_KINASE_ACTIVITY                                 | -1.35 | 0.95 | 0 | 0 | 0 | not significant |
| 2618 | KIM_ALL_DISORDERS_CALB1_CORR_DN                            | -1.35 | 0.95 | 0 | 0 | 0 | not significant |
| 2619 | KASLER_HDAC7_TARGETS_2_DN                                  | -1.35 | 0.94 | 0 | 0 | 0 | not significant |
| 2620 | GO_UREA_CYCLE                                              | -1.35 | 0.92 | 0 | 0 | 0 | not significant |
| 2621 | GO_MRNA_5_SPLICE_SITE_RECOGNITION                          | -1.35 | 0.91 | 0 | 0 | 0 | not significant |
| 2622 | REACTOME_BILE_ACID_AND_BILE_SALT_METABOLISM                | -1.35 | 0.91 | 0 | 0 | 0 | not significant |
| 2623 | GO_DETERMINATION_OF_ADULT_LIFESPAN                         | -1.35 | 0.89 | 0 | 0 | 0 | not significant |
| 2624 | HOLLEMAN_DAUORUBICIN_ALL_UP                                | -1.35 | 0.89 | 0 | 0 | 0 | not significant |
| 2625 | XU_HGF_TARGETS_INDUCED_BY_AKT1_48HR_DN                     | -1.35 | 0.89 | 0 | 0 | 0 | not significant |
| 2626 | GLI1_UP.V1_DN                                              | -1.35 | 0.88 | 0 | 0 | 0 | not significant |
| 2627 | GO_CONDENSED_NUCLEAR_CHROMOSOME_KINETOCHORE                | -1.35 | 0.88 | 0 | 0 | 0 | not significant |
| 2628 | GO_NUCLEAR_PORE_NUCLEAR_BASKET                             | -1.35 | 0.88 | 0 | 0 | 0 | not significant |
| 2629 | GO_PLATELET_DENSE_TUBULAR_NETWORK_MEMBRANE                 | -1.35 | 0.88 | 0 | 0 | 0 | not significant |
| 2630 | TURASHVILI_BREAST_NORMAL_DUCTAL_VS_LOBULAR_DN              | -1.35 | 0.88 | 0 | 0 | 0 | not significant |
| 2631 | GO_FATTY_ACID_LIGASE_ACTIVITY                              | -1.35 | 0.87 | 0 | 0 | 0 | not significant |
| 2632 | GO_POSITIVE_REGULATION_OF_CELL_PROLIFERATION_INVOLVED_IN_H | -1.35 | 0.87 | 0 | 0 | 0 | not significant |
| 2633 | GO_POSITIVE_REGULATION_OF_CHONDROCYTE_DIFFERENTIATION      | -1.35 | 0.87 | 0 | 0 | 0 | not significant |
| 2634 | GO_UV_PROTECTION                                           | -1.35 | 0.87 | 0 | 0 | 0 | not significant |
| 2635 | GO_CELLULAR_RESPONSE_TO_CAFFEINE                           | -1.35 | 0.86 | 0 | 0 | 0 | not significant |
| 2636 | GO_NEURON_NEURON_SYNAPTIC_TRANSMISSION                     | -1.35 | 0.86 | 0 | 0 | 0 | not significant |
| 2637 | GO_PROTEIN_OXIDATION                                       | -1.35 | 0.86 | 0 | 0 | 0 | not significant |
| 2638 | SETLUR_PROSTATE_CANCER_TMPRSS2_ERG_FUSION_DN               | -1.35 | 0.86 | 0 | 0 | 0 | not significant |
| 2639 | GO_CHEMOKINE_BIOSYNTHETIC_PROCESS                          | -1.35 | 0.85 | 0 | 0 | 0 | not significant |
| 2640 | GO_MITOCHONDRIAL_INTERMEMBRANE_SPACE_PROTEIN_TRANSPORTE    | -1.35 | 0.85 | 0 | 0 | 0 | not significant |
| 2641 | GO_POSITIVE_REGULATION_OF_NON_CANONICAL_WNT_SIGNALING_PAT  | -1.35 | 0.84 | 0 | 0 | 0 | not significant |
| 2642 | GO_ER_MEMBRANE_INSERTION_COMPLEX                           | -1.35 | 0.83 | 0 | 0 | 0 | not significant |
| 2643 | GO_DEPYRIMIDINATION                                        | -1.35 | 0.81 | 0 | 0 | 0 | not significant |
| 2644 | GO_POSITIVE_REGULATION_OF_HUMORAL_IMMUNE_RESPONSE          | -1.35 | 0.79 | 0 | 0 | 0 | not significant |
| 2645 | GO_CATION_TRANSMEMBRANE_TRANSPORT                          | -1.34 | 4.00 | 0 | 0 | 0 | not significant |
| 2646 | GO_CELLULAR_RESPONSE_TO_OXYGEN_CONTAINING_COMPOUND         | -1.34 | 4.00 | 0 | 0 | 0 | not significant |
| 2647 | GO_POSITIVE_REGULATION_OF_DEFENSE_RESPONSE                 | -1.34 | 4.00 | 0 | 0 | 0 | not significant |
| 2648 | GO_REGULATION_OF_MITOTIC_CELL_CYCLE                        | -1.34 | 4.00 | 0 | 0 | 0 | not significant |
| 2649 | GRADE_COLON_CANCER_UP                                      | -1.34 | 4.00 | 0 | 0 | 0 | not significant |
| 2650 | MARTENS_TRETINOIN_RESPONSE_UP                              | -1.34 | 1.97 | 0 | 0 | 0 | not significant |
| 2651 | GO_PHOSPHOPROTEIN_PHOSPHATASE_ACTIVITY                     | -1.34 | 1.80 | 0 | 0 | 0 | not significant |
| 2652 | GO_DNA_TEMPLATED_TRANSCRIPTION_ELONGATION                  | -1.34 | 1.72 | 0 | 0 | 0 | not significant |
| 2653 | GO_CELLULAR_RESPONSE_TO_CARBOHYDRATE_STIMULUS              | -1.34 | 1.43 | 0 | 0 | 0 | not significant |
| 2654 | REACTOME_NEGATIVE_EPIGENETIC_REGULATION_OF_RRNA_EXPRESSK   | -1.34 | 1.41 | 0 | 0 | 0 | not significant |
| 2655 | HALLMARK_PROTEIN_SECRETION                                 | -1.34 | 1.37 | 0 | 0 | 0 | not significant |
| 2656 | GO_CONDENSED_CHROMOSOME_CENTROMERIC_REGION                 | -1.34 | 1.33 | 0 | 0 | 0 | not significant |
| 2657 | GO_CELLULAR_COMPONENT_ASSEMBLY_INVOLVED_IN_MORPHOGENES     | -1.34 | 1.25 | 0 | 0 | 0 | not significant |
| 2658 | PEARL_HDAC_PROLIFERATION_CLUSTER_UP                        | -1.34 | 1.22 | 0 | 0 | 0 | not significant |
| 2659 | GO_VESICLE_TARGETING                                       | -1.34 | 1.21 | 0 | 0 | 0 | not significant |
| 2660 | LIM_MAMMARY_LUMINAL_MATURE_UP                              | -1.34 | 1.21 | 0 | 0 | 0 | not significant |
| 2661 | GO_REGULATION_OF_VIRAL_TRANSCRIPTION                       | -1.34 | 1.20 | 0 | 0 | 0 | not significant |
| 2662 | GO_VESICLE_COAT                                            | -1.34 | 1.19 | 0 | 0 | 0 | not significant |
| 2663 | GO_KINASE_ACTIVATOR_ACTIVITY                               | -1.34 | 1.18 | 0 | 0 | 0 | not significant |
| 2664 | OHGUCHI_LIVER_HNF4A_TARGETS_DN                             | -1.34 | 1.17 | 0 | 0 | 0 | not significant |
| 2665 | REACTOME_RHO_GTPASES_ACTIVATE_PKNS                         | -1.34 | 1.15 | 0 | 0 | 0 | not significant |
| 2666 | DURCHDEWALD_SKIN_CARCINOGENESIS_UP                         | -1.34 | 1.13 | 0 | 0 | 0 | not significant |
| 2667 | PUJANA_BREAST_CANCER_WITH_BRCA1_MUTATED_UP                 | -1.34 | 1.11 | 0 | 0 | 0 | not significant |
| 2668 | BOYLAN_MULTIPLE_MYELOMA_PCA1_UP                            | -1.34 | 1.10 | 0 | 0 | 0 | not significant |
| 2669 | GO_HIPPOCAMPUS_DEVELOPMENT                                 | -1.34 | 1.10 | 0 | 0 | 0 | not significant |
| 2670 | GO_PROTEIN_TRANSMEMBRANE_IMPORT_INTO_INTRACELLULAR_ORGA    | -1.34 | 1.10 | 0 | 0 | 0 | not significant |
| 2671 | GO_RIBOSOME_BINDING                                        | -1.34 | 1.09 | 0 | 0 | 0 | not significant |
| 2672 | GO_POSITIVE_REGULATION_OF_TELOMERE_MAINTENANCE             | -1.34 | 1.08 | 0 | 0 | 0 | not significant |
| 2673 | HEIDENBLAD_AMPLICON_12P11_12_UP                            | -1.34 | 1.08 | 0 | 0 | 0 | not significant |
| 2674 | BIOCARTA_VEGF_PATHWAY                                      | -1.34 | 1.06 | 0 | 0 | 0 | not significant |
| 2675 | GO_RESPONSE_TO_AMINO_ACID_STARVATION                       | -1.34 | 1.06 | 0 | 0 | 0 | not significant |
| 2676 | REACTOME_EPHB_MEDIATED_FORWARD_SIGNALING                   | -1.34 | 1.03 | 0 | 0 | 0 | not significant |
| 2677 | GO_POSITIVE_REGULATION_OF_GLIOGENESIS                      | -1.34 | 1.01 | 0 | 0 | 0 | not significant |
| 2678 | GEISS_RESPONSE_TO_DSRNA_UP                                 | -1.34 | 1.00 | 0 | 0 | 0 | not significant |
| 2679 | REACTOME_SIGNALING_BY_RETINOIC_ACID                        | -1.34 | 0.98 | 0 | 0 | 0 | not significant |
| 2680 | BIOCARTA_FMLP_PATHWAY                                      | -1.34 | 0.96 | 0 | 0 | 0 | not significant |
| 2681 | GO_MHC_PROTEIN_COMPLEX_BINDING                             | -1.34 | 0.96 | 0 | 0 | 0 | not significant |
| 2682 | GO_RESPONSE_TO_LITHIUM_ION                                 | -1.34 | 0.95 | 0 | 0 | 0 | not significant |
| 2683 | GO_A_BAND                                                  | -1.34 | 0.93 | 0 | 0 | 0 | not significant |
| 2684 | GO_RESPONSE_TO_INCREASED_OXYGEN_LEVELS                     | -1.34 | 0.92 | 0 | 0 | 0 | not significant |
| 2685 | KEGG_OLFACTORY_TRANSDUCTION                                | -1.34 | 0.92 | 0 | 0 | 0 | not significant |
| 2686 | GO_REGULATION_OF_HORMONE_METABOLIC_PROCESS                 | -1.34 | 0.91 | 0 | 0 | 0 | not significant |
| 2687 | GO_RESPONSE_TO_FLUID_SHEAR_STRESS                          | -1.34 | 0.91 | 0 | 0 | 0 | not significant |
| 2688 | CAFFAREL_RESPONSE_TO_THC_24HR_3_DN                         | -1.34 | 0.89 | 0 | 0 | 0 | not significant |
| 2689 | GO_ACTIN_MONOMER_BINDING                                   | -1.34 | 0.89 | 0 | 0 | 0 | not significant |
| 2690 | GO_REGULATION_OF_HIGH_VOLTAGE_GATED_CALCIIUM_CHANNEL_ACT   | -1.34 | 0.89 | 0 | 0 | 0 | not significant |
| 2691 | GO_CELL_PROLIFERATION_INVOLVED_IN_KIDNEY_DEVELOPMENT       | -1.34 | 0.88 | 0 | 0 | 0 | not significant |
| 2692 | GO_EPITHELIAL_STRUCTURE_MAINTENANCE                        | -1.34 | 0.88 | 0 | 0 | 0 | not significant |
| 2693 | GO_NEGATIVE_REGULATION_OF_ADHERENS_JUNCTION_ORGANIZATION   | -1.34 | 0.88 | 0 | 0 | 0 | not significant |
| 2694 | GO_NEGATIVE_REGULATION_OF_EMBRYONIC_DEVELOPMENT            | -1.34 | 0.88 | 0 | 0 | 0 | not significant |
| 2695 | GO_RELAXATION_OF_MUSCLE                                    | -1.34 | 0.88 | 0 | 0 | 0 | not significant |
| 2696 | BAKER_HEMATOPOIESIS_STAT3_TARGETS                          | -1.34 | 0.87 | 0 | 0 | 0 | not significant |
| 2697 | GO_NONRIBOSOMAL_PEPTIDE_BIOSYNTHETIC_PROCESS               | -1.34 | 0.87 | 0 | 0 | 0 | not significant |
| 2698 | GO_PROTEASOME_BINDING                                      | -1.34 | 0.87 | 0 | 0 | 0 | not significant |
| 2699 | MATTHEWS_SKIN_CARCINOGENESIS_VIA_JUN                       | -1.34 | 0.87 | 0 | 0 | 0 | not significant |
| 2700 | GO_REGULATION_OF_POTASSIUM_ION_IMPORT                      | -1.34 | 0.86 | 0 | 0 | 0 | not significant |
| 2701 | HUNSBERGER_EXERCISE_REGULATED_GENES                        | -1.34 | 0.86 | 0 | 0 | 0 | not significant |
| 2702 | GO_CHOLESTEROL_STORAGE                                     | -1.34 | 0.85 | 0 | 0 | 0 | not significant |
| 2703 | GO_NUCLEOTIDE_DIPHOSPHATASE_ACTIVITY                       | -1.34 | 0.84 | 0 | 0 | 0 | not significant |
| 2704 | GO_POSITIVE_REGULATION_OF_TRANSCRIPTION_INITIATION_FROM_RN | -1.34 | 0.84 | 0 | 0 | 0 | not significant |
| 2705 | GO_DSRNA_TRANSPORT                                         | -1.34 | 0.83 | 0 | 0 | 0 | not significant |
| 2706 | GO_MAST_CELL_GRANULE                                       | -1.34 | 0.83 | 0 | 0 | 0 | not significant |
| 2707 | GO_POSITIVE_REGULATION_OF_SPINDLE_CHECKPOINT               | -1.34 | 0.83 | 0 | 0 | 0 | not significant |
| 2708 | GO_RECEPTOR_SERINE_THREONINE_KINASE_BINDING                | -1.34 | 0.83 | 0 | 0 | 0 | not significant |
| 2709 | REACTOME_HUR_ELAVL1_BINDS_AND_STABILIZES_MRNA              | -1.34 | 0.83 | 0 | 0 | 0 | not significant |
| 2710 | GO_ATP_DEPENDENT_PEPTIDASE_ACTIVITY                        | -1.34 | 0.82 | 0 | 0 | 0 | not significant |
| 2711 | GO_GLUATHIONE_DISULFIDE_OXIDOREDUCTASE_ACTIVITY            | -1.34 | 0.82 | 0 | 0 | 0 | not significant |
| 2712 | GO_NEGATIVE_REGULATION_OF_TYPE_2_IMMUNE_RESPONSE           | -1.34 | 0.82 | 0 | 0 | 0 | not significant |
| 2713 | GO_CELLULAR_RESPONSE_TO_LITHIUM_ION                        | -1.34 | 0.81 | 0 | 0 | 0 | not significant |

|      |                                                            |       |      |   |   |   |                 |
|------|------------------------------------------------------------|-------|------|---|---|---|-----------------|
| 2714 | GO_MEIOTIC_CELL_CYCLE_CHECKPOINT                           | -1.34 | 0.81 | 0 | 0 | 0 | not significant |
| 2715 | GO_CALCINEURIN_COMPLEX                                     | -1.34 | 0.80 | 0 | 0 | 0 | not significant |
| 2716 | GO_COSTAMERE                                               | -1.34 | 0.80 | 0 | 0 | 0 | not significant |
| 2717 | MATZUK_IMPLANTATION_AND_UTERINE                            | -1.34 | 0.80 | 0 | 0 | 0 | not significant |
| 2718 | GO_MIRNA_CATABOLIC_PROCESS                                 | -1.34 | 0.79 | 0 | 0 | 0 | not significant |
| 2719 | GO_MITOTIC_SPINDLE_MIDZONE_ASSEMBLY                        | -1.34 | 0.79 | 0 | 0 | 0 | not significant |
| 2720 | MIKKELSEN_MCV6_LCP_WITH_H3K27ME3                           | -1.34 | 0.77 | 0 | 0 | 0 | not significant |
| 2721 | GO_ANIMAL_ORGAN_MORPHOGENESIS                              | -1.33 | 4.00 | 0 | 0 | 0 | not significant |
| 2722 | GO_EPITHELIUM_DEVELOPMENT                                  | -1.33 | 4.00 | 0 | 0 | 0 | not significant |
| 2723 | GO_TISSUE_MORPHOGENESIS                                    | -1.33 | 4.00 | 0 | 0 | 0 | not significant |
| 2724 | GO_TUBE_DEVELOPMENT                                        | -1.33 | 2.26 | 0 | 0 | 0 | not significant |
| 2725 | GO_RESPONSE_TO_REACTIVE_OXYGEN_SPECIES                     | -1.33 | 2.00 | 0 | 0 | 0 | not significant |
| 2726 | SHAFFER_IRF4_TARGETS_IN_MYELOMA_VS_MATURE_B_LYMPHOCYTE     | -1.33 | 1.59 | 0 | 0 | 0 | not significant |
| 2727 | PENG_LEUCINE_DEPRIVATION_UP                                | -1.33 | 1.37 | 0 | 0 | 0 | not significant |
| 2728 | KAN_RESPONSE_TO_ARSENIC_TRIOXIDE                           | -1.33 | 1.32 | 0 | 0 | 0 | not significant |
| 2729 | REACTOME_GENE_SILENCING_BY_RNA                             | -1.33 | 1.31 | 0 | 0 | 0 | not significant |
| 2730 | BMI1_DN_MEL18_DN.V1_DN                                     | -1.33 | 1.25 | 0 | 0 | 0 | not significant |
| 2731 | PTEN_DN.V1_UP                                              | -1.33 | 1.25 | 0 | 0 | 0 | not significant |
| 2732 | GO_COPII_COATED_VESICLE_BUDDING                            | -1.33 | 1.23 | 0 | 0 | 0 | not significant |
| 2733 | GO_TRANSCRIPTION_COUPLED_NUCLEOTIDE_EXCISION_REPAIR        | -1.33 | 1.20 | 0 | 0 | 0 | not significant |
| 2734 | TAKEDA_TARGETS_OF_NUP98_HOXA9_FUSION_10D_DN                | -1.33 | 1.17 | 0 | 0 | 0 | not significant |
| 2735 | GO_DNA_GEOMETRIC_CHANGE                                    | -1.33 | 1.16 | 0 | 0 | 0 | not significant |
| 2736 | GO_REGULATION_OF_PROTEIN_LOCALIZATION_TO_PLASMA_MEMBRANE   | -1.33 | 1.16 | 0 | 0 | 0 | not significant |
| 2737 | LABBE_TARGETS_OF_TGFB1_AND_WNT3A_DN                        | -1.33 | 1.15 | 0 | 0 | 0 | not significant |
| 2738 | GO_INTRACELLULAR_PROTEIN_TRANSMEMBRANE_TRANSPORT           | -1.33 | 1.13 | 0 | 0 | 0 | not significant |
| 2739 | ANDERSEN_LIVER_CANCER_KRT19_DN                             | -1.33 | 1.09 | 0 | 0 | 0 | not significant |
| 2740 | GO_FATTY_ACID_TRANSPORT                                    | -1.33 | 1.08 | 0 | 0 | 0 | not significant |
| 2741 | REACTOME_DNA_METHYLATION                                   | -1.33 | 1.08 | 0 | 0 | 0 | not significant |
| 2742 | OUILLETTE_CLL_13Q14_DELETION_DN                            | -1.33 | 1.07 | 0 | 0 | 0 | not significant |
| 2743 | GO_REGULATION_OF_STRIATED_MUSCLE_CONTRACTION               | -1.33 | 1.06 | 0 | 0 | 0 | not significant |
| 2744 | BILANGES_SERUM_SENSITIVE_VIA_TSC2                          | -1.33 | 1.00 | 0 | 0 | 0 | not significant |
| 2745 | GO_GLIAL_CELL_ACTIVATION                                   | -1.33 | 0.99 | 0 | 0 | 0 | not significant |
| 2746 | BEIER_GLIOMA_STEM_CELL_UP                                  | -1.33 | 0.98 | 0 | 0 | 0 | not significant |
| 2747 | GO_ACTIN_FILAMENT_DEPOLYMERIZATION                         | -1.33 | 0.97 | 0 | 0 | 0 | not significant |
| 2748 | GO_RESPONSE_TO_TESTOSTERONE                                | -1.33 | 0.96 | 0 | 0 | 0 | not significant |
| 2749 | KEEN_RESPONSE_TO_ROSIGLITAZONE_UP                          | -1.33 | 0.95 | 0 | 0 | 0 | not significant |
| 2750 | GO_POSITIVE_REGULATION_OF_BMP_SIGNALING_PATHWAY            | -1.33 | 0.94 | 0 | 0 | 0 | not significant |
| 2751 | BARIS_THYROID_CANCER_UP                                    | -1.33 | 0.93 | 0 | 0 | 0 | not significant |
| 2752 | GO_LOW_DENSITY_LIPOPROTEIN_RECEPTOR_PARTICLE_METABOLIC_P   | -1.33 | 0.91 | 0 | 0 | 0 | not significant |
| 2753 | EBAUER_MYOGENIC_TARGETS_OF_PAX3_FOXO1_FUSION               | -1.33 | 0.90 | 0 | 0 | 0 | not significant |
| 2754 | REACTOME_ELASTIC_FIBRE_FORMATION                           | -1.33 | 0.90 | 0 | 0 | 0 | not significant |
| 2755 | GO_LUNG_EPITHELIUM_DEVELOPMENT                             | -1.33 | 0.89 | 0 | 0 | 0 | not significant |
| 2756 | GO_PEPTIDE_ANTIGEN_BINDING                                 | -1.33 | 0.89 | 0 | 0 | 0 | not significant |
| 2757 | GO_PHOTOPERIODISM                                          | -1.33 | 0.88 | 0 | 0 | 0 | not significant |
| 2758 | HASLINGER_B_CLL_WITH_17P13_DELETION                        | -1.33 | 0.88 | 0 | 0 | 0 | not significant |
| 2759 | GO_REGULATION_OF_APOIKIS                                   | -1.33 | 0.87 | 0 | 0 | 0 | not significant |
| 2760 | GO_AZOLE_TRANSPORT                                         | -1.33 | 0.86 | 0 | 0 | 0 | not significant |
| 2761 | GO_SERINE_FAMILY_AMINO_ACID_BIOSYNTHETIC_PROCESS           | -1.33 | 0.86 | 0 | 0 | 0 | not significant |
| 2762 | GO_SWR1_COMPLEX                                            | -1.33 | 0.86 | 0 | 0 | 0 | not significant |
| 2763 | RAMPON_ENRICHED_LEARNING_ENVIRONMENT_LATE_UP               | -1.33 | 0.84 | 0 | 0 | 0 | not significant |
| 2764 | GO_LONG_CHAIN_FATTY_ACYL_COA_BIOSYNTHETIC_PROCESS          | -1.33 | 0.83 | 0 | 0 | 0 | not significant |
| 2765 | KOINUMA_COLON_CANCER_MSI_UP                                | -1.33 | 0.83 | 0 | 0 | 0 | not significant |
| 2766 | GO_BOX_C_D_SNORNP_ASSEMBLY                                 | -1.33 | 0.82 | 0 | 0 | 0 | not significant |
| 2767 | GO_IMMUNE_RESPONSE_TO_TUMOR_CELL                           | -1.33 | 0.82 | 0 | 0 | 0 | not significant |
| 2768 | GO_LOW_DENSITY_LIPOPROTEIN_RECEPTOR_CATABOLIC_P            | -1.33 | 0.82 | 0 | 0 | 0 | not significant |
| 2769 | GO_RENAL_SODIUM_ION_TRANSPORT                              | -1.33 | 0.82 | 0 | 0 | 0 | not significant |
| 2770 | GALI_TP53_TARGETS_APOPTOTIC_DN                             | -1.33 | 0.81 | 0 | 0 | 0 | not significant |
| 2771 | GO_KINETOCHORE_MICROTUBULE                                 | -1.33 | 0.81 | 0 | 0 | 0 | not significant |
| 2772 | GO_REGULATION_OF_GROWTH_RATE                               | -1.33 | 0.81 | 0 | 0 | 0 | not significant |
| 2773 | MACLACHLAN_BRCA1_TARGETS_DN                                | -1.33 | 0.81 | 0 | 0 | 0 | not significant |
| 2774 | GO_CYTOSKELETAL_ADAPTOR_ACTIVITY                           | -1.33 | 0.80 | 0 | 0 | 0 | not significant |
| 2775 | GO_PROTEIN_SERINE_THREONINE_PHOSPHATASE_INHIBITOR_ACTIVITY | -1.33 | 0.80 | 0 | 0 | 0 | not significant |
| 2776 | MAINA_VHL_TARGETS_DN                                       | -1.33 | 0.80 | 0 | 0 | 0 | not significant |
| 2777 | GO_RESPONSE_TO GRANULOCYTE MACROPHAGE COLONY STIMULAT      | -1.33 | 0.79 | 0 | 0 | 0 | not significant |
| 2778 | GO_POSITIVE_REGULATION_OF_VIRAL_ENTRY_INTO_HOST_CELL       | -1.33 | 0.78 | 0 | 0 | 0 | not significant |
| 2779 | GO_INTRINSIC_APOPTOTIC_SIGNALING_PATHWAY_IN_RESPONSE_TO_H  | -1.33 | 0.75 | 0 | 0 | 0 | not significant |
| 2780 | SCIAN_CELL_CYCLE_TARGETS_OF_TP53_AND_TP73_UP               | -1.33 | 0.73 | 0 | 0 | 0 | not significant |
| 2781 | GO_CYTOSKELETAL_PROTEIN_BINDING                            | -1.32 | 4.00 | 0 | 0 | 0 | not significant |
| 2782 | GO_NUCLEOLUS                                               | -1.32 | 4.00 | 0 | 0 | 0 | not significant |
| 2783 | ROME_INSULIN_TARGETS_IN_MUSCLE_UP                          | -1.32 | 4.00 | 0 | 0 | 0 | not significant |
| 2784 | GO_DEFENSE_RESPONSE_TO_OTHER_ORGANISM                      | -1.32 | 2.39 | 0 | 0 | 0 | not significant |
| 2785 | GO_ATPASE_ACTIVITY                                         | -1.32 | 2.35 | 0 | 0 | 0 | not significant |
| 2786 | GO_RESPONSE_TO_WOUNDING                                    | -1.32 | 2.32 | 0 | 0 | 0 | not significant |
| 2787 | GO_TUBE_MORPHOGENESIS                                      | -1.32 | 2.28 | 0 | 0 | 0 | not significant |
| 2788 | GO_REGULATION_OF_CHROMOSOME_ORGANIZATION                   | -1.32 | 2.07 | 0 | 0 | 0 | not significant |
| 2789 | GO_GUANYL_NUCLEOTIDE_BINDING                               | -1.32 | 2.04 | 0 | 0 | 0 | not significant |
| 2790 | GO_SPINDLE                                                 | -1.32 | 1.94 | 0 | 0 | 0 | not significant |
| 2791 | GO_REGULATION_OF_PEPTIDASE_ACTIVITY                        | -1.32 | 1.93 | 0 | 0 | 0 | not significant |
| 2792 | GO_GLAND_DEVELOPMENT                                       | -1.32 | 1.82 | 0 | 0 | 0 | not significant |
| 2793 | HEDENFALK_BREAST_CANCER_BRCA1_VS_BRCA2                     | -1.32 | 1.77 | 0 | 0 | 0 | not significant |
| 2794 | GO_CELL_SURFACE                                            | -1.32 | 1.71 | 0 | 0 | 0 | not significant |
| 2795 | GO_AMIDE_BINDING                                           | -1.32 | 1.69 | 0 | 0 | 0 | not significant |
| 2796 | CAIRO_HEPATOBLASTOMA_DN                                    | -1.32 | 1.62 | 0 | 0 | 0 | not significant |
| 2797 | LINDGREN_BLADDER_CANCER_WITH_LOH_IN_CHR9Q                  | -1.32 | 1.58 | 0 | 0 | 0 | not significant |
| 2798 | KEGG_CHEMOKINE_SIGNALING_PATHWAY                           | -1.32 | 1.55 | 0 | 0 | 0 | not significant |
| 2799 | GO_STRIATED_MUSCLE_CELL_DIFFERENTIATION                    | -1.32 | 1.48 | 0 | 0 | 0 | not significant |
| 2800 | CHUNG_BLISTER_CYTOTOXICITY_UP                              | -1.32 | 1.40 | 0 | 0 | 0 | not significant |
| 2801 | ESC_J1_UP_LATE.V1_DN                                       | -1.32 | 1.37 | 0 | 0 | 0 | not significant |
| 2802 | GO_POSITIVE_REGULATION_OF_WNT_SIGNALING_PATHWAY            | -1.32 | 1.35 | 0 | 0 | 0 | not significant |
| 2803 | GO_SINGLE_STRANDED_DNA_BINDING                             | -1.32 | 1.34 | 0 | 0 | 0 | not significant |
| 2804 | BROWNE_HCMV_INFECTION_48HR_UP                              | -1.32 | 1.29 | 0 | 0 | 0 | not significant |
| 2805 | REACTOME_TRANSCRIPTION_COUPLED_NUCLEOTIDE_EXCISION_REPAIR  | -1.32 | 1.28 | 0 | 0 | 0 | not significant |
| 2806 | GO_REGULATION_OF_PROTEIN_LOCALIZATION_TO_CELL_PERIPHERY    | -1.32 | 1.20 | 0 | 0 | 0 | not significant |
| 2807 | DER_IFN_GAMMA_RESPONSE_UP                                  | -1.32 | 1.17 | 0 | 0 | 0 | not significant |
| 2808 | TBK1.DN.48HRS_DN                                           | -1.32 | 1.13 | 0 | 0 | 0 | not significant |
| 2809 | GO_LYMPHOCYTE_MIGRATION                                    | -1.32 | 1.09 | 0 | 0 | 0 | not significant |
| 2810 | FLECHNER_PBL_KIDNEY_TRANSPLANT_OK_VS_DONOR_DN              | -1.32 | 1.06 | 0 | 0 | 0 | not significant |
| 2811 | GO_RESPONSE_TO_BRONCHODILATOR                              | -1.32 | 1.05 | 0 | 0 | 0 | not significant |
| 2812 | COATES_MACROPHAGE_I1_VS_I2_DN                              | -1.32 | 1.04 | 0 | 0 | 0 | not significant |
| 2813 | GO_UBIQUITIN_LIKE_PROTEIN_CONJUGATING_ENZYME_ACTIVITY      | -1.32 | 0.98 | 0 | 0 | 0 | not significant |
| 2814 | REACTOME_PINK_PARKIN_MEDIATED_MITOPHAGY                    | -1.32 | 0.97 | 0 | 0 | 0 | not significant |
| 2815 | KEGG_MTOR_SIGNALING_PATHWAY                                | -1.32 | 0.96 | 0 | 0 | 0 | not significant |
| 2816 | REACTOME_AMINO_ACID_TRANSPORT_ACROSS_THE_PLASMA_MEMBRAN    | -1.32 | 0.96 | 0 | 0 | 0 | not significant |
| 2817 | GO_DISULFIDE_OXIDOREDUCTASE_ACTIVITY                       | -1.32 | 0.95 | 0 | 0 | 0 | not significant |
| 2818 | GO_RNA_STABILIZATION                                       | -1.32 | 0.95 | 0 | 0 | 0 | not significant |
| 2819 | REACTOME_MITOCHONDRIAL_CALCIIUM_ION_TRANSPORT              | -1.32 | 0.94 | 0 | 0 | 0 | not significant |
| 2820 | CEBALLOS_TARGETS_OF_TP53_AND_MYC_UP                        | -1.32 | 0.93 | 0 | 0 | 0 | not significant |
| 2821 | GO_NEGATIVE_REGULATION_OF_PEPTIDYL_SERINE_PHOSPHORYLATIO   | -1.32 | 0.91 | 0 | 0 | 0 | not significant |
| 2822 | GO_RNA_POLYMERASE_II_GENERAL_TRANSCRIPTION_INITIATION_FACT | -1.32 | 0.91 | 0 | 0 | 0 | not significant |

|      |                                                             |       |      |   |   |   |                 |
|------|-------------------------------------------------------------|-------|------|---|---|---|-----------------|
| 2823 | GO_GOLGI_LUMEN                                              | -1.32 | 0.90 | 0 | 0 | 0 | not significant |
| 2824 | NOUSHMEHR_GBM_SILENCED_BY_METHYLATION                       | -1.32 | 0.90 | 0 | 0 | 0 | not significant |
| 2825 | GO_FATTY_ACID_DERIVATIVE_BINDING                            | -1.32 | 0.89 | 0 | 0 | 0 | not significant |
| 2826 | GO_CULLIN_FAMILY_PROTEIN_BINDING                            | -1.32 | 0.88 | 0 | 0 | 0 | not significant |
| 2827 | HALMOS_CEBPA_TARGETS_DN                                     | -1.32 | 0.88 | 0 | 0 | 0 | not significant |
| 2828 | REACTOME_BRANCHED_CHAIN_AMINO_ACID_CATABOLISM               | -1.32 | 0.88 | 0 | 0 | 0 | not significant |
| 2829 | REACTOME_VEGFR2_MEDIATED_CELL_PROLIFERATION                 | -1.32 | 0.88 | 0 | 0 | 0 | not significant |
| 2830 | GO_OXIDOREDUCTASE_ACTIVITY_ACTING_ON_THE_CH_NH_GROUP_OF     | -1.32 | 0.87 | 0 | 0 | 0 | not significant |
| 2831 | GO_REGULATION_OF_CELLULAR_EXTRAVASATION                     | -1.32 | 0.87 | 0 | 0 | 0 | not significant |
| 2832 | BERENJENO_TRANSFORMED_BY_RHOA_REVERSIBLY_DN                 | -1.32 | 0.86 | 0 | 0 | 0 | not significant |
| 2833 | GO_POSITIVE_REGULATION_OF_LIPID_STORAGE                     | -1.32 | 0.86 | 0 | 0 | 0 | not significant |
| 2834 | GO_POSITIVE_REGULATION_OF_TRIGLYCERIDE_BIOSYNTHETIC_PROCE   | -1.32 | 0.86 | 0 | 0 | 0 | not significant |
| 2835 | GO_RIBOSOMAL_LARGE_SUBUNIT_BINDING                          | -1.32 | 0.85 | 0 | 0 | 0 | not significant |
| 2836 | GO_ANTIGEN_PROCESSING_AND_PRESENTATION_OF_PEPTIDE_ANTIGEN   | -1.32 | 0.84 | 0 | 0 | 0 | not significant |
| 2837 | GO_PRENYLTRANSFERASE_ACTIVITY                               | -1.32 | 0.84 | 0 | 0 | 0 | not significant |
| 2838 | CHUANG_OXIDATIVE_STRESS_RESPONSE_UP                         | -1.32 | 0.83 | 0 | 0 | 0 | not significant |
| 2839 | DEMAGALHAES_AGING_DN                                        | -1.32 | 0.83 | 0 | 0 | 0 | not significant |
| 2840 | GO_LIPOPHAGY                                                | -1.32 | 0.83 | 0 | 0 | 0 | not significant |
| 2841 | GO_SECONDARY_METABOLITE_BIOSYNTHETIC_PROCESS                | -1.32 | 0.82 | 0 | 0 | 0 | not significant |
| 2842 | BIOCARTA_CDC25_PATHWAY                                      | -1.32 | 0.81 | 0 | 0 | 0 | not significant |
| 2843 | GO_CELLULAR_RESPONSE_TO_NITROGEN_STARVATION                 | -1.32 | 0.81 | 0 | 0 | 0 | not significant |
| 2844 | GO_DNA_TOPOLOGICAL_CHANGE                                   | -1.32 | 0.81 | 0 | 0 | 0 | not significant |
| 2845 | GO_NEGATIVE_REGULATION_OF_CAMP_DEPENDENT_PROTEIN_KINASE     | -1.32 | 0.81 | 0 | 0 | 0 | not significant |
| 2846 | BIOCARTA_FREE_PATHWAY                                       | -1.32 | 0.80 | 0 | 0 | 0 | not significant |
| 2847 | GO_TRANSFERASE_ACTIVITY_TRANSFERRING_NITROGENOUS_GROUPS     | -1.32 | 0.80 | 0 | 0 | 0 | not significant |
| 2848 | BIOCARTA_CACAM_PATHWAY                                      | -1.32 | 0.79 | 0 | 0 | 0 | not significant |
| 2849 | GO_NEPHRON_TUBULE_EPITHELIAL_CELL_DIFFERENTIATION           | -1.32 | 0.79 | 0 | 0 | 0 | not significant |
| 2850 | GO_S_ADENOSYL_L_METHIONINE_BINDING                          | -1.32 | 0.79 | 0 | 0 | 0 | not significant |
| 2851 | PHESSIE_TARGETS_OF_APC_AND_MBD2_DN                          | -1.32 | 0.78 | 0 | 0 | 0 | not significant |
| 2852 | GO_EPITHELIAL_CELL_DIFFERENTIATION_INVOLVED_IN_PROSTATE_GLA | -1.32 | 0.77 | 0 | 0 | 0 | not significant |
| 2853 | GO_PRIMARY_ALCOHOL_CATABOLIC_PROCESS                        | -1.32 | 0.77 | 0 | 0 | 0 | not significant |
| 2854 | REACTOME_SHC_RELATED_EVENTS_TRIGGERED_BY_IGF1R              | -1.32 | 0.77 | 0 | 0 | 0 | not significant |
| 2855 | WANG_CLASSIC_ADIPOGENIC_TARGETS_OF_PPARG                    | -1.32 | 0.77 | 0 | 0 | 0 | not significant |
| 2856 | GO_DEPHOSPHORYLATION_OF_RNA_POLYMERASE_II_C_TERMINAL_DOI    | -1.32 | 0.74 | 0 | 0 | 0 | not significant |
| 2857 | WU_APOPTOSIS_BY_CDKN1A_NOT_VIA_TP53                         | -1.32 | 0.74 | 0 | 0 | 0 | not significant |
| 2858 | GO_CIRCULATORY_SYSTEM_DEVELOPMENT                           | -1.31 | 4.00 | 0 | 0 | 0 | not significant |
| 2859 | GO_ESTABLISHMENT_OF_ORGANELLE_LOCALIZATION                  | -1.31 | 4.00 | 0 | 0 | 0 | not significant |
| 2860 | GO_MOLECULAR_FUNCTION_REGULATOR                             | -1.31 | 4.00 | 0 | 0 | 0 | not significant |
| 2861 | GO_MYELOID_LEUKOCYTE_ACTIVATION                             | -1.31 | 4.00 | 0 | 0 | 0 | not significant |
| 2862 | GO_RESPONSE_TO_BIOTIC_STIMULUS                              | -1.31 | 4.00 | 0 | 0 | 0 | not significant |
| 2863 | GO_CALCIIUM_ION_BINDING                                     | -1.31 | 2.35 | 0 | 0 | 0 | not significant |
| 2864 | REACTOME_ESR_MEDIATED_SIGNALING                             | -1.31 | 1.98 | 0 | 0 | 0 | not significant |
| 2865 | GO_RUFFLE                                                   | -1.31 | 1.75 | 0 | 0 | 0 | not significant |
| 2866 | GO_FIBRILLAR_CENTER                                         | -1.31 | 1.66 | 0 | 0 | 0 | not significant |
| 2867 | GO_RESPONSE_TO_STARVATION                                   | -1.31 | 1.57 | 0 | 0 | 0 | not significant |
| 2868 | GO_ESTABLISHMENT_OR_MAINTENANCE_OF_CELL_POLARITY            | -1.31 | 1.55 | 0 | 0 | 0 | not significant |
| 2869 | GO_INTERACTION_WITH_HOST                                    | -1.31 | 1.55 | 0 | 0 | 0 | not significant |
| 2870 | GO_FATTY_ACID_METABOLIC_PROCESS                             | -1.31 | 1.44 | 0 | 0 | 0 | not significant |
| 2871 | MEK_UP.V1_UP                                                | -1.31 | 1.43 | 0 | 0 | 0 | not significant |
| 2872 | SHETH_LIVER_CANCER_VS_TXNIP_LOSS_PAM4                       | -1.31 | 1.43 | 0 | 0 | 0 | not significant |
| 2873 | DARWICHE_SKIN_TUMOR_PROMOTER_UP                             | -1.31 | 1.35 | 0 | 0 | 0 | not significant |
| 2874 | GO_CALCIIUM_ION_TRANSMEMBRANE_IMPORT_INTO_CYTOSOL           | -1.31 | 1.35 | 0 | 0 | 0 | not significant |
| 2875 | GO_RNA_PHOSPHODIESTER_BOND_HYDROLYSIS                       | -1.31 | 1.35 | 0 | 0 | 0 | not significant |
| 2876 | GO_SULFUR_COMPOUND_BINDING                                  | -1.31 | 1.30 | 0 | 0 | 0 | not significant |
| 2877 | BROWN_MYELOID_CELL_DEVELOPMENT_UP                           | -1.31 | 1.23 | 0 | 0 | 0 | not significant |
| 2878 | REACTOME_INTERFERON_GAMMA_SIGNALING                         | -1.31 | 1.21 | 0 | 0 | 0 | not significant |
| 2879 | FOSTER_KDM1A_TARGETS_UP                                     | -1.31 | 1.20 | 0 | 0 | 0 | not significant |
| 2880 | REACTOME_NONHOMOLOGOUS_END_JOINING_NHEJ                     | -1.31 | 1.17 | 0 | 0 | 0 | not significant |
| 2881 | UEDA_CENTRAL_CLOCK                                          | -1.31 | 1.17 | 0 | 0 | 0 | not significant |
| 2882 | GO_RESPONSE_TO_ALKALOID                                     | -1.31 | 1.14 | 0 | 0 | 0 | not significant |
| 2883 | ZHU_CMV_ALL_DN                                              | -1.31 | 1.13 | 0 | 0 | 0 | not significant |
| 2884 | GO_ATP_DEPENDENT_CHROMATIN_REMODELING                       | -1.31 | 1.10 | 0 | 0 | 0 | not significant |
| 2885 | GO_DNA_PACKAGING_COMPLEX                                    | -1.31 | 1.10 | 0 | 0 | 0 | not significant |
| 2886 | HOOL_ST7_TARGETS_DN                                         | -1.31 | 1.06 | 0 | 0 | 0 | not significant |
| 2887 | GO_BONE_MORPHOGENESIS                                       | -1.31 | 1.05 | 0 | 0 | 0 | not significant |
| 2888 | GO_RENAL_TUBULE_DEVELOPMENT                                 | -1.31 | 1.05 | 0 | 0 | 0 | not significant |
| 2889 | GO_POSITIVE_REGULATION_OF_T_CELL_PROLIFERATION              | -1.31 | 1.04 | 0 | 0 | 0 | not significant |
| 2890 | BROWNE_INTERFERON_RESPONSIVE_GENES                          | -1.31 | 1.03 | 0 | 0 | 0 | not significant |
| 2891 | GO_REGULATION_OF_SPINDLE_ORGANIZATION                       | -1.31 | 1.03 | 0 | 0 | 0 | not significant |
| 2892 | REACTOME_FORMATION_OF_INCISION_COMPLEX_IN_GG_NER            | -1.31 | 1.03 | 0 | 0 | 0 | not significant |
| 2893 | HAHTOLA_SEZARY_SYNDROM_UP                                   | -1.31 | 1.02 | 0 | 0 | 0 | not significant |
| 2894 | GENTILE_UV_RESPONSE_CLUSTER_D4                              | -1.31 | 1.01 | 0 | 0 | 0 | not significant |
| 2895 | HU_GENOTOXIN_ACTION_DIRECT_VS_INDIRECT_24HR                 | -1.31 | 1.00 | 0 | 0 | 0 | not significant |
| 2896 | MEISSNER_NPC_HCP_WITH_H3K4ME3_AND_H3K27ME3                  | -1.31 | 0.98 | 0 | 0 | 0 | not significant |
| 2897 | GO_POSITIVE_REGULATION_OF_REPRODUCTIVE_PROCESS              | -1.31 | 0.95 | 0 | 0 | 0 | not significant |
| 2898 | VANDESLUIS_COMMD1_TARGETS_GROUP_3_UP                        | -1.31 | 0.95 | 0 | 0 | 0 | not significant |
| 2899 | GO_REGULATION_OF_MONOOXYGENASE_ACTIVITY                     | -1.31 | 0.94 | 0 | 0 | 0 | not significant |
| 2900 | GUTIERREZ_MULTIPLE_MYELOMA_UP                               | -1.31 | 0.94 | 0 | 0 | 0 | not significant |
| 2901 | GO_EMBRYONIC_CAMERA_TYPE_EYE_DEVELOPMENT                    | -1.31 | 0.93 | 0 | 0 | 0 | not significant |
| 2902 | GO_NEGATIVE_REGULATION_OF_LYMPHOCYTE_APOPTOTIC_PROCESS      | -1.31 | 0.93 | 0 | 0 | 0 | not significant |
| 2903 | MODY_HIPPOCAMPUS_NEONATAL                                   | -1.31 | 0.93 | 0 | 0 | 0 | not significant |
| 2904 | GO_NUCLEOTIDE_EXCISION_REPAIR_PREINCISION_COMPLEX_STABILIZA | -1.31 | 0.92 | 0 | 0 | 0 | not significant |
| 2905 | GO_REGULATION_OF_VASCULAR_ENDOTHELIAL_GROWTH_FACTOR_RE      | -1.31 | 0.92 | 0 | 0 | 0 | not significant |
| 2906 | PID_VEGFR1_PATHWAY                                          | -1.31 | 0.92 | 0 | 0 | 0 | not significant |
| 2907 | CHEOK_RESPONSE_TO_MERCAPTOPYRINE_AND_HD_MTX_DN              | -1.31 | 0.91 | 0 | 0 | 0 | not significant |
| 2908 | GO_ANTIBIOTIC_METABOLIC_PROCESS                             | -1.31 | 0.91 | 0 | 0 | 0 | not significant |
| 2909 | WU_HBX_TARGETS_3_UP                                         | -1.31 | 0.91 | 0 | 0 | 0 | not significant |
| 2910 | GO_CELL_DEATH_IN_RESPONSE_TO_HYDROGEN_PEROXIDE              | -1.31 | 0.89 | 0 | 0 | 0 | not significant |
| 2911 | GO_REGULATION_OF_STEROL_TRANSPORT                           | -1.31 | 0.88 | 0 | 0 | 0 | not significant |
| 2912 | GO_CALCIIUM_RELEASE_CHANNEL_ACTIVITY                        | -1.31 | 0.87 | 0 | 0 | 0 | not significant |
| 2913 | GO_POSITIVE_REGULATION_OF_NITRIC_OXIDE_SYNTHASE_ACTIVITY    | -1.31 | 0.87 | 0 | 0 | 0 | not significant |
| 2914 | GO_RETINOIC_ACID_RECEPTOR_SIGNALING_PATHWAY                 | -1.31 | 0.87 | 0 | 0 | 0 | not significant |
| 2915 | GO_REGULATION_OF_ESTABLISHMENT_OF_PROTEIN_LOCALIZATION_TC   | -1.31 | 0.84 | 0 | 0 | 0 | not significant |
| 2916 | REACTOME_UREA_CYCLE                                         | -1.31 | 0.83 | 0 | 0 | 0 | not significant |
| 2917 | REACTOME_MASTL_FACILITATES_MITOTIC_PROGRESSION              | -1.31 | 0.81 | 0 | 0 | 0 | not significant |
| 2918 | REACTOME_RUNX1_REGULATES_ESTROGEN_RECEPTOR_MEDIATED_TF      | -1.31 | 0.80 | 0 | 0 | 0 | not significant |
| 2919 | SA_TRKA_RECEPTOR                                            | -1.31 | 0.80 | 0 | 0 | 0 | not significant |
| 2920 | GO_DETECTION_OF_CALCIIUM_ION                                | -1.31 | 0.79 | 0 | 0 | 0 | not significant |
| 2921 | GO_ESTABLISHMENT_OR_MAINTENANCE_OF_CYTOSKELETON_POLARIT     | -1.31 | 0.79 | 0 | 0 | 0 | not significant |
| 2922 | GO_FATTY_ACID_HOMEOSTASIS                                   | -1.31 | 0.79 | 0 | 0 | 0 | not significant |
| 2923 | GO_NUCLEOTIDE_SALVAGE                                       | -1.31 | 0.79 | 0 | 0 | 0 | not significant |
| 2924 | GO_RETINOL_DEHYDROGENASE_ACTIVITY                           | -1.31 | 0.79 | 0 | 0 | 0 | not significant |
| 2925 | KEGG_PANTOTHENATE_AND_COA_BIOSYNTHESIS                      | -1.31 | 0.79 | 0 | 0 | 0 | not significant |
| 2926 | GO_OXIDATIVE_DNA_DEMETHYLATION                              | -1.31 | 0.78 | 0 | 0 | 0 | not significant |
| 2927 | GO_VINCULIN_BINDING                                         | -1.31 | 0.78 | 0 | 0 | 0 | not significant |
| 2928 | REACTOME_PRESYNAPTIC_FUNCTION_OF_KAINATE_RECEPTORS          | -1.31 | 0.78 | 0 | 0 | 0 | not significant |
| 2929 | GO_POSITIVE_REGULATION_OF_CELL_MIGRATION_INVOLVED_IN_SPROL  | -1.31 | 0.77 | 0 | 0 | 0 | not significant |
| 2930 | GO_REVERSE_CHOLESTEROL_TRANSPORT                            | -1.31 | 0.77 | 0 | 0 | 0 | not significant |
| 2931 | GO_RIBOSOMAL_PROTEIN_S6_KINASE_ACTIVITY                     | -1.31 | 0.77 | 0 | 0 | 0 | not significant |

|      |                                                            |       |      |   |   |   |                 |
|------|------------------------------------------------------------|-------|------|---|---|---|-----------------|
| 2932 | GO_SEQUENCE_SPECIFIC_MRNA_BINDING                          | -1.31 | 0.77 | 0 | 0 | 0 | not significant |
| 2933 | GO_DYSTROGLYCAN_BINDING                                    | -1.31 | 0.76 | 0 | 0 | 0 | not significant |
| 2934 | GO_POSITIVE_REGULATION_OF_DEACETYLASE_ACTIVITY             | -1.31 | 0.76 | 0 | 0 | 0 | not significant |
| 2935 | SHIN_B_CELL_LYMPHOMA_CLUSTER_3                             | -1.31 | 0.76 | 0 | 0 | 0 | not significant |
| 2936 | GO_ARACHIDONIC_ACID_SECRETION                              | -1.31 | 0.75 | 0 | 0 | 0 | not significant |
| 2937 | GO_EMBRYONIC_DIGESTIVE_TRACT_DEVELOPMENT                   | -1.31 | 0.75 | 0 | 0 | 0 | not significant |
| 2938 | TSUDA_ALVEOLAR_SOFT_PART_SARCOMA                           | -1.31 | 0.75 | 0 | 0 | 0 | not significant |
| 2939 | GO_7S_RNA_BINDING                                          | -1.31 | 0.74 | 0 | 0 | 0 | not significant |
| 2940 | CHR4Q23                                                    | -1.31 | 0.73 | 0 | 0 | 0 | not significant |
| 2941 | GO_ACTIN_DEPENDENT_ATPASE_ACTIVITY                         | -1.31 | 0.73 | 0 | 0 | 0 | not significant |
| 2942 | GO_REGULATION_OF_REMOVAL_OF_SUPEROXIDE_RADICALS            | -1.31 | 0.73 | 0 | 0 | 0 | not significant |
| 2943 | REACTOME_ACTIVATION_OF_RAC1_DOWNSTREAM_OF_NMDARS           | -1.31 | 0.73 | 0 | 0 | 0 | not significant |
| 2944 | GO_ACTIN_FILAMENT_BASED_PROCESS                            | -1.30 | 4.00 | 0 | 0 | 0 | not significant |
| 2945 | GO_DEFENSE_RESPONSE                                        | -1.30 | 4.00 | 0 | 0 | 0 | not significant |
| 2946 | GO_ION_TRANSMEMBRANE_TRANSPORT                             | -1.30 | 4.00 | 0 | 0 | 0 | not significant |
| 2947 | GO_REGULATION_OF_CELLULAR_CATABOLIC_PROCESS                | -1.30 | 4.00 | 0 | 0 | 0 | not significant |
| 2948 | GO_REGULATION_OF_IMMUNE_SYSTEM_PROCESS                     | -1.30 | 4.00 | 0 | 0 | 0 | not significant |
| 2949 | LIU_SOX4_TARGETS_DN                                        | -1.30 | 2.37 | 0 | 0 | 0 | not significant |
| 2950 | GO_SUPRAMOLECULAR_FIBER_ORGANIZATION                       | -1.30 | 2.26 | 0 | 0 | 0 | not significant |
| 2951 | WANG_CLIM2_TARGETS_DN                                      | -1.30 | 1.76 | 0 | 0 | 0 | not significant |
| 2952 | GO_MUSCLE_TISSUE_DEVELOPMENT                               | -1.30 | 1.73 | 0 | 0 | 0 | not significant |
| 2953 | GO_RESPONSE_TO_PEPTIDE_HORMONE                             | -1.30 | 1.71 | 0 | 0 | 0 | not significant |
| 2954 | SHEPARD_BMYB_MORPHOLINO_UP                                 | -1.30 | 1.60 | 0 | 0 | 0 | not significant |
| 2955 | CREIGHTON_ENDOCRINE_THERAPY_RESISTANCE_4                   | -1.30 | 1.56 | 0 | 0 | 0 | not significant |
| 2956 | HALLMARK_APICAL_JUNCTION                                   | -1.30 | 1.51 | 0 | 0 | 0 | not significant |
| 2957 | WHITFIELD_CELL_CYCLE_G2                                    | -1.30 | 1.48 | 0 | 0 | 0 | not significant |
| 2958 | ALONSO_METASTASIS_UP                                       | -1.30 | 1.46 | 0 | 0 | 0 | not significant |
| 2959 | GO_TISSUE_MIGRATION                                        | -1.30 | 1.42 | 0 | 0 | 0 | not significant |
| 2960 | GO_PROTEIN_IMPORT                                          | -1.30 | 1.34 | 0 | 0 | 0 | not significant |
| 2961 | GROSS_HYPOXIA_VIA_ELK3_AND_HIF1A_UP                        | -1.30 | 1.33 | 0 | 0 | 0 | not significant |
| 2962 | GO_REGULATION_OF_GENE_SILENCING                            | -1.30 | 1.31 | 0 | 0 | 0 | not significant |
| 2963 | ELVIDGE_HYPOXIA_BY_DMOG_UP                                 | -1.30 | 1.26 | 0 | 0 | 0 | not significant |
| 2964 | REACTOME_SUMOYLATION                                       | -1.30 | 1.26 | 0 | 0 | 0 | not significant |
| 2965 | GO_MRNA_3_END_PROCESSING                                   | -1.30 | 1.23 | 0 | 0 | 0 | not significant |
| 2966 | GO_PROTEIN_TYROSINE_PHOSPHATASE_ACTIVITY                   | -1.30 | 1.19 | 0 | 0 | 0 | not significant |
| 2967 | GO_POSITIVE_REGULATION_OF_CANONICAL_WNT_SIGNALING_PATHWAY  | -1.30 | 1.18 | 0 | 0 | 0 | not significant |
| 2968 | HALLMARK_MYOGENESIS                                        | -1.30 | 1.18 | 0 | 0 | 0 | not significant |
| 2969 | GO_NEGATIVE_REGULATION_OF_PEPTIDE_SECRETION                | -1.30 | 1.17 | 0 | 0 | 0 | not significant |
| 2970 | GO_POSITIVE_REGULATION_OF_PROTEIN_MODIFICATION_BY_SMALL_PF | -1.30 | 1.17 | 0 | 0 | 0 | not significant |
| 2971 | DARWICHE_PAPILLOMA_RISK_LOW_UP                             | -1.30 | 1.16 | 0 | 0 | 0 | not significant |
| 2972 | GO_ORGANELLE_MEMBRANE_FUSION                               | -1.30 | 1.12 | 0 | 0 | 0 | not significant |
| 2973 | REACTOME_TELOMERE_MAINTENANCE                              | -1.30 | 1.10 | 0 | 0 | 0 | not significant |
| 2974 | GO_PROTEIN_DEPOLYMERIZATION                                | -1.30 | 1.09 | 0 | 0 | 0 | not significant |
| 2975 | KEGG_ADIPOCYTOKINE_SIGNALING_PATHWAY                       | -1.30 | 1.08 | 0 | 0 | 0 | not significant |
| 2976 | GO_REGULATION_OF_PLASMA_LIPOPROTEIN_PARTICLE_LEVELS        | -1.30 | 1.06 | 0 | 0 | 0 | not significant |
| 2977 | GO_POTASSIUM_ION_TRANSMEMBRANE_TRANSPORTER_ACTIVITY        | -1.30 | 1.05 | 0 | 0 | 0 | not significant |
| 2978 | LEE_AGING_CEREBELLUM_DN                                    | -1.30 | 1.05 | 0 | 0 | 0 | not significant |
| 2979 | REACTOME_SUMOYLATION_OF_CHROMATIN_ORGANIZATION_PROTEINS    | -1.30 | 1.05 | 0 | 0 | 0 | not significant |
| 2980 | REACTOME_TP53_REGULATES_TRANSCRIPTION_OF_DNA_REPAIR_GENI   | -1.30 | 1.05 | 0 | 0 | 0 | not significant |
| 2981 | ESC_J1_UP_LATE.V1_UP                                       | -1.30 | 1.04 | 0 | 0 | 0 | not significant |
| 2982 | CHR7Q32                                                    | -1.30 | 0.97 | 0 | 0 | 0 | not significant |
| 2983 | REN_BOUND_BY_E2F                                           | -1.30 | 0.97 | 0 | 0 | 0 | not significant |
| 2984 | REACTOME_SYNTHESIS_OF_ACTIVE_UBIQUITIN_ROLES_OF_E1_AND_E2  | -1.30 | 0.96 | 0 | 0 | 0 | not significant |
| 2985 | REACTOME_RNA_POLYMERASE_I_TRANSCRIPTION_TERMINATION        | -1.30 | 0.95 | 0 | 0 | 0 | not significant |
| 2986 | GO_TERTIARY_GRANULE_MEMBRANE                               | -1.30 | 0.94 | 0 | 0 | 0 | not significant |
| 2987 | GO_KINESIN_COMPLEX                                         | -1.30 | 0.93 | 0 | 0 | 0 | not significant |
| 2988 | GO_MECHANORECEPTOR_DIFFERENTIATION                         | -1.30 | 0.92 | 0 | 0 | 0 | not significant |
| 2989 | GO_RECEPTOR_CATABOLIC_PROCESS                              | -1.30 | 0.91 | 0 | 0 | 0 | not significant |
| 2990 | PID_HIF2PATHWAY                                            | -1.30 | 0.90 | 0 | 0 | 0 | not significant |
| 2991 | LIANG_SILENCED_BY_METHYLATION_2                            | -1.30 | 0.89 | 0 | 0 | 0 | not significant |
| 2992 | GO_POSITIVE_REGULATION_OF_VIRAL_GENOME_REPLICATION         | -1.30 | 0.88 | 0 | 0 | 0 | not significant |
| 2993 | KRASNOSELSKAYA_ILF3_TARGETS_DN                             | -1.30 | 0.88 | 0 | 0 | 0 | not significant |
| 2994 | SCIAN_INVERSED_TARGETS_OF_TP53_AND_TP73_DN                 | -1.30 | 0.88 | 0 | 0 | 0 | not significant |
| 2995 | YAO_HOXA10_TARGETS_VIA_PROGESTERONE_UP                     | -1.30 | 0.88 | 0 | 0 | 0 | not significant |
| 2996 | GO_BETA_CATENIN_TCF_COMPLEX_ASSEMBLY                       | -1.30 | 0.87 | 0 | 0 | 0 | not significant |
| 2997 | GO_SULFUR_COMPOUND_TRANSPORT                               | -1.30 | 0.87 | 0 | 0 | 0 | not significant |
| 2998 | PID_ECADHERIN_STABILIZATION_PATHWAY                        | -1.30 | 0.87 | 0 | 0 | 0 | not significant |
| 2999 | HAHTOLA_SEZARY_SYNDROM_DN                                  | -1.30 | 0.86 | 0 | 0 | 0 | not significant |
| 3000 | GO_ICOSANOID_BIOSYNTHETIC_PROCESS                          | -1.30 | 0.82 | 0 | 0 | 0 | not significant |
| 3001 | GO_POSITIVE_REGULATION_OF_INTERFERON_ALPHA_PRODUCTION      | -1.30 | 0.82 | 0 | 0 | 0 | not significant |
| 3002 | GO_RHYTHMIC_BEHAVIOR                                       | -1.30 | 0.82 | 0 | 0 | 0 | not significant |
| 3003 | GO_NEGATIVE_REGULATION_OF_TELOMERE_MAINTENANCE_VIA_TELOM   | -1.30 | 0.81 | 0 | 0 | 0 | not significant |
| 3004 | GO_PROTON_TRANSPORTING_TWO_SECTOR_ATPASE_COMPLEX_CATA      | -1.30 | 0.81 | 0 | 0 | 0 | not significant |
| 3005 | GO_U1_SNRNP                                                | -1.30 | 0.81 | 0 | 0 | 0 | not significant |
| 3006 | KIM_LRRC3B_TARGETS                                         | -1.30 | 0.81 | 0 | 0 | 0 | not significant |
| 3007 | REACTOME_REGULATION_OF_GENE_EXPRESSION_IN_LATE_STAGE_BRV   | -1.30 | 0.81 | 0 | 0 | 0 | not significant |
| 3008 | REACTOME_SYNTHESIS_OF_VERY_LONG_CHAIN_FATTY_ACYL_COAS      | -1.30 | 0.81 | 0 | 0 | 0 | not significant |
| 3009 | GHO_ATF5_TARGETS_DN                                        | -1.30 | 0.80 | 0 | 0 | 0 | not significant |
| 3010 | GO_DIGESTIVE_TRACT_MORPHOGENESIS                           | -1.30 | 0.80 | 0 | 0 | 0 | not significant |
| 3011 | GO_INCLUSION_BODY_ASSEMBLY                                 | -1.30 | 0.80 | 0 | 0 | 0 | not significant |
| 3012 | REACTOME_CELL_EXTRACELLULAR_MATRIX_INTERACTIONS            | -1.30 | 0.80 | 0 | 0 | 0 | not significant |
| 3013 | GO_DNA_TOPOISOMERASE_BINDING                               | -1.30 | 0.79 | 0 | 0 | 0 | not significant |
| 3014 | GO_NEGATIVE_REGULATION_OF_STRIATED_MUSCLE_CELL_APOPTOTIC   | -1.30 | 0.79 | 0 | 0 | 0 | not significant |
| 3015 | GO_SIGNAL_RECOGNITION_PARTICLE_ENDOPLASMIC_RETICULUM_TARC  | -1.30 | 0.78 | 0 | 0 | 0 | not significant |
| 3016 | BIOCARTA_DREAM_PATHWAY                                     | -1.30 | 0.77 | 0 | 0 | 0 | not significant |
| 3017 | GO_NOTCH_BINDING                                           | -1.30 | 0.77 | 0 | 0 | 0 | not significant |
| 3018 | GO_OXIDOREDUCTASE_ACTIVITY_ACTING_ON_A_SULFUR_GROUP_OF_I   | -1.30 | 0.77 | 0 | 0 | 0 | not significant |
| 3019 | GO_VASCULAR_ENDOTHELIAL_GROWTH_FACTOR_RECEPTOR_2_BINDIN    | -1.30 | 0.77 | 0 | 0 | 0 | not significant |
| 3020 | KIM_PTEN_TARGETS_UP                                        | -1.30 | 0.77 | 0 | 0 | 0 | not significant |
| 3021 | REACTOME_NEF_MEDIATED_DOWNREGULATION_OF_MHC_CLASS_I_COI    | -1.30 | 0.77 | 0 | 0 | 0 | not significant |
| 3022 | REACTOME_LOSS_OF_MECP2_BINDING_ABILITY_TO_THE_NCOR_SMRT_   | -1.30 | 0.76 | 0 | 0 | 0 | not significant |
| 3023 | REACTOME_SYNTHESIS_OF_PYROPHOSPHATES_IN_THE_CYTOSOL        | -1.30 | 0.76 | 0 | 0 | 0 | not significant |
| 3024 | GO_AXO_DENDRITIC_PROTEIN_TRANSPORT                         | -1.30 | 0.75 | 0 | 0 | 0 | not significant |
| 3025 | GO_CELLULAR_RESPONSE_TO_ALDEHYDE                           | -1.30 | 0.75 | 0 | 0 | 0 | not significant |
| 3026 | GO_NATURAL_KILLER_CELL_DEGRANULATION                       | -1.30 | 0.75 | 0 | 0 | 0 | not significant |
| 3027 | GO_PRE_SNRNP_COMPLEX                                       | -1.30 | 0.75 | 0 | 0 | 0 | not significant |
| 3028 | GO_REGULATION_OF_SKELETAL_MUSCLE_ADAPTATION                | -1.30 | 0.75 | 0 | 0 | 0 | not significant |
| 3029 | KRISHNAN_FURIN_TARGETS_DN                                  | -1.30 | 0.75 | 0 | 0 | 0 | not significant |
| 3030 | YAO_TEMPORAL_RESPONSE_TO_PROGESTERONE_CLUSTER_4            | -1.30 | 0.75 | 0 | 0 | 0 | not significant |
| 3031 | GO_ANNULATE_LAMELLAE                                       | -1.30 | 0.74 | 0 | 0 | 0 | not significant |
| 3032 | GO_NEGATIVE_REGULATION_OF_DENDRITIC_SPINE_DEVELOPMENT      | -1.30 | 0.74 | 0 | 0 | 0 | not significant |
| 3033 | GO_REGULATION_OF_TOLL_LIKE_RECEPTOR_9_SIGNALING_PATHWAY    | -1.30 | 0.74 | 0 | 0 | 0 | not significant |
| 3034 | REACTOME_Glutamate_NEUROTRANSMITTER_RELEASE_CYCLE          | -1.30 | 0.74 | 0 | 0 | 0 | not significant |
| 3035 | GO_ESTABLISHMENT_OF_GOLGI_LOCALIZATION                     | -1.30 | 0.73 | 0 | 0 | 0 | not significant |
| 3036 | GO_LACTATE_METABOLIC_PROCESS                               | -1.30 | 0.73 | 0 | 0 | 0 | not significant |
| 3037 | LIU_CD22_TARGETS_UP                                        | -1.30 | 0.73 | 0 | 0 | 0 | not significant |
| 3038 | GO_TRANSCRIPTION_FACTOR_TFIIF_CORE_COMPLEX                 | -1.30 | 0.72 | 0 | 0 | 0 | not significant |
| 3039 | HOLLEMAN_DAUNORUBICIN_B_ALL_UP                             | -1.30 | 0.72 | 0 | 0 | 0 | not significant |
| 3040 | GO_EMBRYONIC_VISCEROCRANIUM_MORPHOGENESIS                  | -1.30 | 0.69 | 0 | 0 | 0 | not significant |

|      |                                                              |       |      |   |   |   |                 |
|------|--------------------------------------------------------------|-------|------|---|---|---|-----------------|
| 3041 | GO_MEMBRANE_ORGANIZATION                                     | -1.29 | 4.00 | 0 | 0 | 0 | not significant |
| 3042 | GO_PROTEIN_DIMERIZATION_ACTIVITY                             | -1.29 | 4.00 | 0 | 0 | 0 | not significant |
| 3043 | GO_PROTEIN_HOMODIMERIZATION_ACTIVITY                         | -1.29 | 4.00 | 0 | 0 | 0 | not significant |
| 3044 | GO_MYELOID_LEUKOCYTE_MEDIATED_IMMUNITY                       | -1.29 | 1.97 | 0 | 0 | 0 | not significant |
| 3045 | GO_NUCLEOBASE_CONTAINING_SMALL_MOLECULE_METABOLIC_PROCE      | -1.29 | 1.94 | 0 | 0 | 0 | not significant |
| 3046 | GO_RESPONSE_TO_BACTERIUM                                     | -1.29 | 1.86 | 0 | 0 | 0 | not significant |
| 3047 | HUTTMANN_B_CELL_POOR_SURVIVAL_UP                             | -1.29 | 1.73 | 0 | 0 | 0 | not significant |
| 3048 | GO_DEPHOSPHORYLATION                                         | -1.29 | 1.67 | 0 | 0 | 0 | not significant |
| 3049 | BERTUCCI_MEDULLARY_VS_DUCTAL_BREAST_CANCER_UP                | -1.29 | 1.65 | 0 | 0 | 0 | not significant |
| 3050 | GO_RHYTHMIC_PROCESS                                          | -1.29 | 1.51 | 0 | 0 | 0 | not significant |
| 3051 | GO_PROTEIN_HOMOOLIGOMERIZATION                               | -1.29 | 1.49 | 0 | 0 | 0 | not significant |
| 3052 | GO_CELLULAR_RESPONSE_TO_EXTRACELLULAR_STIMULUS               | -1.29 | 1.39 | 0 | 0 | 0 | not significant |
| 3053 | GO_CYTOKINESIS                                               | -1.29 | 1.30 | 0 | 0 | 0 | not significant |
| 3054 | GO_REGULATION_OF_PROTEIN_DEPHOSPHORYLATION                   | -1.29 | 1.20 | 0 | 0 | 0 | not significant |
| 3055 | ACEVEDO_LIVER_CANCER_WITH_H3K9ME3_DN                         | -1.29 | 1.18 | 0 | 0 | 0 | not significant |
| 3056 | RPS14_DN.V1_UP                                               | -1.29 | 1.18 | 0 | 0 | 0 | not significant |
| 3057 | REACTOME_BIOLOGICAL_OXIDATIONS                               | -1.29 | 1.17 | 0 | 0 | 0 | not significant |
| 3058 | REACTOME_G2_M_DNA_DAMAGE_CHECKPOINT                          | -1.29 | 1.17 | 0 | 0 | 0 | not significant |
| 3059 | PID_P73PATHWAY                                               | -1.29 | 1.15 | 0 | 0 | 0 | not significant |
| 3060 | GO_REGULATION_OF_DNA_BIOSYNTHETIC_PROCESS                    | -1.29 | 1.13 | 0 | 0 | 0 | not significant |
| 3061 | GO_RESPONSE_TO_ORGANOPHOSPHORUS                              | -1.29 | 1.10 | 0 | 0 | 0 | not significant |
| 3062 | ZHOU_CELL_CYCLE_GENES_IN_IR_RESPONSE_6HR                     | -1.29 | 1.10 | 0 | 0 | 0 | not significant |
| 3063 | JAZAG_TGFB1_SIGNALING_VIA_SMAD4_UP                           | -1.29 | 1.04 | 0 | 0 | 0 | not significant |
| 3064 | PRAMOONJAGO_SOX4_TARGETS_DN                                  | -1.29 | 1.04 | 0 | 0 | 0 | not significant |
| 3065 | CHR12Q23                                                     | -1.29 | 1.03 | 0 | 0 | 0 | not significant |
| 3066 | GAJATE_RESPONSE_TO TRABECTEDIN_UP                            | -1.29 | 1.02 | 0 | 0 | 0 | not significant |
| 3067 | BIOCARTA_TCR_PATHWAY                                         | -1.29 | 0.94 | 0 | 0 | 0 | not significant |
| 3068 | CERVERA_SDHB_TARGETS_1_UP                                    | -1.29 | 0.94 | 0 | 0 | 0 | not significant |
| 3069 | GO_CENTRAL_NERVOUS_SYSTEM_NEURON_DEVELOPMENT                 | -1.29 | 0.93 | 0 | 0 | 0 | not significant |
| 3070 | GO_NEGATIVE_REGULATION_OF_CHROMOSOME_SEGREGATION             | -1.29 | 0.93 | 0 | 0 | 0 | not significant |
| 3071 | GO_OVULATION_CYCLE                                           | -1.29 | 0.90 | 0 | 0 | 0 | not significant |
| 3072 | GO_SKELETAL_MUSCLE_CELL_DIFFERENTIATION                      | -1.29 | 0.88 | 0 | 0 | 0 | not significant |
| 3073 | REACTOME_DISEASES_ASSOCIATED_WITH_O_GLYCOSYLATION_OF_PR      | -1.29 | 0.88 | 0 | 0 | 0 | not significant |
| 3074 | REACTOME_SIGNALING_BY_FGFR2_IN_DISEASE                       | -1.29 | 0.88 | 0 | 0 | 0 | not significant |
| 3075 | BIOCARTA_INTEGRIN_PATHWAY                                    | -1.29 | 0.87 | 0 | 0 | 0 | not significant |
| 3076 | GO_MODULATION_BY_SYMBIONT_OF_HOST_CELLULAR_PROCESS           | -1.29 | 0.87 | 0 | 0 | 0 | not significant |
| 3077 | PETROVA_PROX1_TARGETS_DN                                     | -1.29 | 0.87 | 0 | 0 | 0 | not significant |
| 3078 | GO_POSITIVE_REGULATION_OF_STEROL_TRANSPORT                   | -1.29 | 0.85 | 0 | 0 | 0 | not significant |
| 3079 | ICHIBA_GRAFT_VERSUS_HOST_DISEASE_35D_DN                      | -1.29 | 0.85 | 0 | 0 | 0 | not significant |
| 3080 | XU_AKT1_TARGETS_6HR                                          | -1.29 | 0.85 | 0 | 0 | 0 | not significant |
| 3081 | GO_RESPONSE_TO_INTERFERON_BETA                               | -1.29 | 0.82 | 0 | 0 | 0 | not significant |
| 3082 | GO_ATP_DEPENDENT_MICROTUBULE_MOTOR_ACTIVITY                  | -1.29 | 0.81 | 0 | 0 | 0 | not significant |
| 3083 | GRANDVAUX_IRF3_TARGETS_UP                                    | -1.29 | 0.81 | 0 | 0 | 0 | not significant |
| 3084 | SINGH_NFE2L2_TARGETS                                         | -1.29 | 0.81 | 0 | 0 | 0 | not significant |
| 3085 | GO_KILLING_OF_CELLS_OF_OTHER_ORGANISM                        | -1.29 | 0.80 | 0 | 0 | 0 | not significant |
| 3086 | GO_RENAL_WATER_HOMEOSTASIS                                   | -1.29 | 0.80 | 0 | 0 | 0 | not significant |
| 3087 | REACTOME_SEMA3A_PLEXIN_REPULSION_SIGNALING_BY_INHIBITING_INT | -1.29 | 0.80 | 0 | 0 | 0 | not significant |
| 3088 | VERRECCHIA_RESPONSE_TO_TGFB1_C3                              | -1.29 | 0.79 | 0 | 0 | 0 | not significant |
| 3089 | MATTIOLI_MGUS_VS_MULTIPLE_MYELOMA                            | -1.29 | 0.78 | 0 | 0 | 0 | not significant |
| 3090 | GO_MUSCLE_HYPERTROPHY_IN_RESPONSE_TO_STRESS                  | -1.29 | 0.77 | 0 | 0 | 0 | not significant |
| 3091 | BIOCARTA_EFP_PATHWAY                                         | -1.29 | 0.76 | 0 | 0 | 0 | not significant |
| 3092 | CHR14Q13                                                     | -1.29 | 0.76 | 0 | 0 | 0 | not significant |
| 3093 | EHRlich_ICF_SYNDROM_DN                                       | -1.29 | 0.75 | 0 | 0 | 0 | not significant |
| 3094 | GO_INTEGRIN_ACTIVATION                                       | -1.29 | 0.75 | 0 | 0 | 0 | not significant |
| 3095 | GO_PANCREATIC_JUICE_SECRETION                                | -1.29 | 0.75 | 0 | 0 | 0 | not significant |
| 3096 | JOHANSSON_BRAIN_CANCER_EARLY_VS_LATE_UP                      | -1.29 | 0.75 | 0 | 0 | 0 | not significant |
| 3097 | REACTOME_RUNX1_REGULATES_TRANSCRIPTION_OF_GENES_INVOLVEI     | -1.29 | 0.75 | 0 | 0 | 0 | not significant |
| 3098 | SHIN_B_CELL_LYMPHOMA_CLUSTER_9                               | -1.29 | 0.75 | 0 | 0 | 0 | not significant |
| 3099 | WANG_RECURRENT_LIVER_CANCER_DN                               | -1.29 | 0.75 | 0 | 0 | 0 | not significant |
| 3100 | GO_SNRNP_BINDING                                             | -1.29 | 0.74 | 0 | 0 | 0 | not significant |
| 3101 | KEGG_GRAFT_VERSUS_HOST_DISEASE                               | -1.29 | 0.74 | 0 | 0 | 0 | not significant |
| 3102 | GO_G_PROTEIN_BETA_GAMMA_SUBUNIT_COMPLEX_BINDING              | -1.29 | 0.73 | 0 | 0 | 0 | not significant |
| 3103 | GO_NEGATIVE_REGULATION_OF_SINGLE_STRANDED_VIRAL_RNA_REPLI    | -1.29 | 0.73 | 0 | 0 | 0 | not significant |
| 3104 | GO_PEPTIDE_ALPHA_N_ACETYLTTRANSFERASE_ACTIVITY               | -1.29 | 0.73 | 0 | 0 | 0 | not significant |
| 3105 | GO_REGULATION_OF_TAU_PROTEIN_KINASE_ACTIVITY                 | -1.29 | 0.73 | 0 | 0 | 0 | not significant |
| 3106 | BIOCARTA_EIF2_PATHWAY                                        | -1.29 | 0.72 | 0 | 0 | 0 | not significant |
| 3107 | GO_BARBED_END_ACTIN_FILAMENT_CAPPING                         | -1.29 | 0.72 | 0 | 0 | 0 | not significant |
| 3108 | GO_WD40_REPEAT_DOMAIN_BINDING                                | -1.29 | 0.70 | 0 | 0 | 0 | not significant |
| 3109 | MURAKAMI_UV_RESPONSE_1HR_UP                                  | -1.29 | 0.70 | 0 | 0 | 0 | not significant |
| 3110 | DOUGLAS_BMI1_TARGETS_UP                                      | -1.28 | 4.00 | 0 | 0 | 0 | not significant |
| 3111 | GO_CATION_TRANSPORT                                          | -1.28 | 4.00 | 0 | 0 | 0 | not significant |
| 3112 | GO_CHEMICAL_HOMEOSTASIS                                      | -1.28 | 4.00 | 0 | 0 | 0 | not significant |
| 3113 | GO_EXOCYTOSIS                                                | -1.28 | 4.00 | 0 | 0 | 0 | not significant |
| 3114 | REACTOME_DISEASE                                             | -1.28 | 4.00 | 0 | 0 | 0 | not significant |
| 3115 | GO_REGULATION_OF_CELL_CYCLE_PROCESS                          | -1.28 | 2.12 | 0 | 0 | 0 | not significant |
| 3116 | GO_RESPONSE_TO_TOXIC_SUBSTANCE                               | -1.28 | 2.06 | 0 | 0 | 0 | not significant |
| 3117 | GO_NEGATIVE_REGULATION_OF_MITOTIC_CELL_CYCLE                 | -1.28 | 1.88 | 0 | 0 | 0 | not significant |
| 3118 | HELLER_HDAC_TARGETS_SILENCED_BY_METHYLATION_UP               | -1.28 | 1.68 | 0 | 0 | 0 | not significant |
| 3119 | BENPORATH_MYC_TARGETS_WITH_EBOX                              | -1.28 | 1.65 | 0 | 0 | 0 | not significant |
| 3120 | GO_NEGATIVE_REGULATION_OF_TRANSPORT                          | -1.28 | 1.61 | 0 | 0 | 0 | not significant |
| 3121 | GO_AMEBOIDAL_TYPE_CELL_MIGRATION                             | -1.28 | 1.43 | 0 | 0 | 0 | not significant |
| 3122 | GO_CHROMOSOME_CENTROMERIC_REGION                             | -1.28 | 1.37 | 0 | 0 | 0 | not significant |
| 3123 | GO_ACTIN_BINDING                                             | -1.28 | 1.31 | 0 | 0 | 0 | not significant |
| 3124 | EGFR_UP.V1_UP                                                | -1.28 | 1.30 | 0 | 0 | 0 | not significant |
| 3125 | GO_CELL_CHEMOTAXIS                                           | -1.28 | 1.30 | 0 | 0 | 0 | not significant |
| 3126 | GO_MULTI_MULTICELLULAR_ORGANISM_PROCESS                      | -1.28 | 1.28 | 0 | 0 | 0 | not significant |
| 3127 | KYNG_DNA_DAMAGE_DN                                           | -1.28 | 1.28 | 0 | 0 | 0 | not significant |
| 3128 | GO_POSITIVE_REGULATION_OF_PEPTIDASE_ACTIVITY                 | -1.28 | 1.25 | 0 | 0 | 0 | not significant |
| 3129 | GO_NEGATIVE_REGULATION_OF_ESTABLISHMENT_OF_PROTEIN_LOCAL     | -1.28 | 1.17 | 0 | 0 | 0 | not significant |
| 3130 | GO_PEPTIDYL_TYROSINE_DEPHOSPHORYLATION                       | -1.28 | 1.17 | 0 | 0 | 0 | not significant |
| 3131 | DARWICHE_PAPILLOMA_RISK_HIGH_UP                              | -1.28 | 1.16 | 0 | 0 | 0 | not significant |
| 3132 | YAO_TEMPORAL_RESPONSE_TO_PROGESTERONE_CLUSTER_12             | -1.28 | 1.07 | 0 | 0 | 0 | not significant |
| 3133 | GROSS_HYPOXIA_VIA_ELK3_AND_HIF1A_DN                          | -1.28 | 1.06 | 0 | 0 | 0 | not significant |
| 3134 | GO_REGULATION_OF_CALCIIUM_ION_TRANSMEMBRANE_TRANSPORT        | -1.28 | 1.04 | 0 | 0 | 0 | not significant |
| 3135 | GO_REGULATION_OF_GLIOGENESIS                                 | -1.28 | 1.04 | 0 | 0 | 0 | not significant |
| 3136 | GO_NEURON_PROJECTION_CYTOPLASM                               | -1.28 | 1.03 | 0 | 0 | 0 | not significant |
| 3137 | REACTOME_HDACs_DEACETYLATE_HISTONES                          | -1.28 | 1.02 | 0 | 0 | 0 | not significant |
| 3138 | REACTOME_SUMOYLATION_OF_RNA_BINDING_PROTEINS                 | -1.28 | 1.00 | 0 | 0 | 0 | not significant |
| 3139 | GO_ER_TO_GOLGI_TRANSPORT_VESICLE_MEMBRANE                    | -1.28 | 0.99 | 0 | 0 | 0 | not significant |
| 3140 | GO_RESPONSE_TO_ANTI NEOPLASTIC_AGENT                         | -1.28 | 0.99 | 0 | 0 | 0 | not significant |
| 3141 | MODY_HIPPOCAMPUS_POSTNATAL                                   | -1.28 | 0.98 | 0 | 0 | 0 | not significant |
| 3142 | CHR6Q21                                                      | -1.28 | 0.95 | 0 | 0 | 0 | not significant |
| 3143 | CHR1P22                                                      | -1.28 | 0.94 | 0 | 0 | 0 | not significant |
| 3144 | DASU_IL6_SIGNALING_UP                                        | -1.28 | 0.93 | 0 | 0 | 0 | not significant |
| 3145 | REACTOME_HSF1_DEPENDENT_TRANSACTIVATION                      | -1.28 | 0.92 | 0 | 0 | 0 | not significant |
| 3146 | NIKOLSKY_BREAST_CANCER_12Q13_Q21_AMPlicON                    | -1.28 | 0.91 | 0 | 0 | 0 | not significant |
| 3147 | STAMBOLSKY_TARGETS_OF_MUTATED_TP53_UP                        | -1.28 | 0.91 | 0 | 0 | 0 | not significant |
| 3148 | GO_AMINO_ACID_TRANSMEMBRANE_TRANSPORTER_ACTIVITY             | -1.28 | 0.90 | 0 | 0 | 0 | not significant |
| 3149 | GO_EXTRACELLULAR_MATRIX_STRUCTURAL_CONSTITUENT               | -1.28 | 0.90 | 0 | 0 | 0 | not significant |

|      |                                                            |       |      |   |   |   |                 |
|------|------------------------------------------------------------|-------|------|---|---|---|-----------------|
| 3150 | BIOCARTA_GPCR_PATHWAY                                      | -1.28 | 0.89 | 0 | 0 | 0 | not significant |
| 3151 | GERHOLD_ADIPOGENESIS_UP                                    | -1.28 | 0.89 | 0 | 0 | 0 | not significant |
| 3152 | GO_PLATELET_ALPHA_GRANULE_LUMEN                            | -1.28 | 0.88 | 0 | 0 | 0 | not significant |
| 3153 | GO_REGULATION_OF_LAMELLIPODIUM_ORGANIZATION                | -1.28 | 0.88 | 0 | 0 | 0 | not significant |
| 3154 | EINAV_INTERFERON_SIGNATURE_IN_CANCER                       | -1.28 | 0.86 | 0 | 0 | 0 | not significant |
| 3155 | GO_POSITIVE_REGULATION_OF_TELOMERE_MAINTENANCE_VIA_TELOM   | -1.28 | 0.86 | 0 | 0 | 0 | not significant |
| 3156 | HEIDENBLAD_AMPLICON_8Q24_UP                                | -1.28 | 0.85 | 0 | 0 | 0 | not significant |
| 3157 | GO_REGULATION_OF_CYTOPLASMIC_TRANSLATION                   | -1.28 | 0.84 | 0 | 0 | 0 | not significant |
| 3158 | REACTOME_SIGNALING_BY_WNT_IN_CANCER                        | -1.28 | 0.84 | 0 | 0 | 0 | not significant |
| 3159 | GO_TRANSCRIPTION_PREINITIATION_COMPLEX_ASSEMBLY            | -1.28 | 0.83 | 0 | 0 | 0 | not significant |
| 3160 | SU_LIVER                                                   | -1.28 | 0.83 | 0 | 0 | 0 | not significant |
| 3161 | WANG_RECURRENT_LIVER_CANCER_UP                             | -1.28 | 0.83 | 0 | 0 | 0 | not significant |
| 3162 | GO_CLATHRIN_VESICLE_COAT                                   | -1.28 | 0.82 | 0 | 0 | 0 | not significant |
| 3163 | REACTOME_THROMBOXANE_SIGNALING_THROUGH_TP_RECEPTOR         | -1.28 | 0.81 | 0 | 0 | 0 | not significant |
| 3164 | CEBALLOS_TARGETS_OF_TP53_AND_MYC_DN                        | -1.28 | 0.80 | 0 | 0 | 0 | not significant |
| 3165 | BIOCARTA_NGF_PATHWAY                                       | -1.28 | 0.79 | 0 | 0 | 0 | not significant |
| 3166 | GO_INACTIVATION_OF_MAPK_ACTIVITY                           | -1.28 | 0.79 | 0 | 0 | 0 | not significant |
| 3167 | GO_MUSCLE_FIBER_DEVELOPMENT                                | -1.28 | 0.78 | 0 | 0 | 0 | not significant |
| 3168 | GO_CRANIAL_NERVE_DEVELOPMENT                               | -1.28 | 0.77 | 0 | 0 | 0 | not significant |
| 3169 | GO_FEMALE_MEIOTIC_NUCLEAR_DIVISION                         | -1.28 | 0.77 | 0 | 0 | 0 | not significant |
| 3170 | GO_PHOTORECEPTOR_INNER_SEGMENT                             | -1.28 | 0.77 | 0 | 0 | 0 | not significant |
| 3171 | LI_ADIPOGENESIS_BY_ACTIVATED_PPARG                         | -1.28 | 0.77 | 0 | 0 | 0 | not significant |
| 3172 | YANG_BREAST_CANCER_ESR1_BULK_DN                            | -1.28 | 0.77 | 0 | 0 | 0 | not significant |
| 3173 | GO_MICRO_RIBONUCLEOPROTEIN_COMPLEX                         | -1.28 | 0.76 | 0 | 0 | 0 | not significant |
| 3174 | GO_MYELIN_MAINTENANCE                                      | -1.28 | 0.76 | 0 | 0 | 0 | not significant |
| 3175 | WANG_LSD1_TARGETS_UP                                       | -1.28 | 0.76 | 0 | 0 | 0 | not significant |
| 3176 | KEGG_BIOSYNTHESIS_OF_UNSATURATED_FATTY_ACIDS               | -1.28 | 0.75 | 0 | 0 | 0 | not significant |
| 3177 | WHITESIDE_CISPLATIN_RESISTANCE_UP                          | -1.28 | 0.75 | 0 | 0 | 0 | not significant |
| 3178 | GO_MITOCHONDRIAL_RNA_CATABOLIC_PROCESS                     | -1.28 | 0.74 | 0 | 0 | 0 | not significant |
| 3179 | VALK_AML_CLUSTER_13                                        | -1.28 | 0.74 | 0 | 0 | 0 | not significant |
| 3180 | GO_ESTABLISHMENT_OF_PROTEIN_LOCALIZATION_TO_CHROMATIN      | -1.28 | 0.73 | 0 | 0 | 0 | not significant |
| 3181 | GO_MAP_KINASE_PHOSPHATASE_ACTIVITY                         | -1.28 | 0.73 | 0 | 0 | 0 | not significant |
| 3182 | GO_REGULATION_OF_DIGESTIVE_SYSTEM_PROCESS                  | -1.28 | 0.73 | 0 | 0 | 0 | not significant |
| 3183 | GO_TRNA_SPECIFIC_ADENOSINE_DEAMINASE_ACTIVITY              | -1.28 | 0.73 | 0 | 0 | 0 | not significant |
| 3184 | GO_WIDE_PORE_CHANNEL_ACTIVITY                              | -1.28 | 0.73 | 0 | 0 | 0 | not significant |
| 3185 | REACTOME_CREB1_PHOSPHORYLATION_THROUGH_THE_ACTIVATION_C    | -1.28 | 0.73 | 0 | 0 | 0 | not significant |
| 3186 | GO_EOSINOPHIL_ACTIVATION                                   | -1.28 | 0.72 | 0 | 0 | 0 | not significant |
| 3187 | KUROKAWA_LIVER_CANCER_EARLY_RECURRENCE_UP                  | -1.28 | 0.72 | 0 | 0 | 0 | not significant |
| 3188 | GO_NEGATIVE_REGULATION_OF_GLUCOSE_TRANSMEMBRANE_TRANSP     | -1.28 | 0.71 | 0 | 0 | 0 | not significant |
| 3189 | GO_SMOOTH_MUSCLE_TISSUE_DEVELOPMENT                        | -1.28 | 0.70 | 0 | 0 | 0 | not significant |
| 3190 | CERVERA_SDHB_TARGETS_1_DN                                  | -1.28 | 0.69 | 0 | 0 | 0 | not significant |
| 3191 | GO_BEHAVIORAL_RESPONSE_TO_COCAINE                          | -1.28 | 0.69 | 0 | 0 | 0 | not significant |
| 3192 | REACTOME_SYNTHESIS_OF_KETONE_BODIES                        | -1.28 | 0.69 | 0 | 0 | 0 | not significant |
| 3193 | GO_REGULATION_OF_MICROGLIAL_CELL_ACTIVATION                | -1.28 | 0.68 | 0 | 0 | 0 | not significant |
| 3194 | GO_REGULATION_BY_VIRUS_OF_VIRAL_PROTEIN_LEVELS_IN_HOST_CEL | -1.28 | 0.67 | 0 | 0 | 0 | not significant |
| 3195 | FULCHER_INFLAMMATORY_RESPONSE_LECTIN_VS_LPS_UP             | -1.27 | 4.00 | 0 | 0 | 0 | not significant |
| 3196 | GO_ION_TRANSPORT                                           | -1.27 | 4.00 | 0 | 0 | 0 | not significant |
| 3197 | REACTOME_TRANSCRIPTIONAL_REGULATION_BY_TP53                | -1.27 | 2.03 | 0 | 0 | 0 | not significant |
| 3198 | MEISSNER_BRAIN_HCP_WITH_H3K4ME3_AND_H3K27ME3               | -1.27 | 2.00 | 0 | 0 | 0 | not significant |
| 3199 | RUTELLA_RESPONSE_TO_CSF2RB_AND_IL4_DN                      | -1.27 | 1.88 | 0 | 0 | 0 | not significant |
| 3200 | GO_IMMUNE_EFFECTOR_PROCESS                                 | -1.27 | 1.74 | 0 | 0 | 0 | not significant |
| 3201 | DAIRKEE_TERT_TARGETS_UP                                    | -1.27 | 1.67 | 0 | 0 | 0 | not significant |
| 3202 | GO_CELLULAR_RESPONSE_TO_DRUG                               | -1.27 | 1.66 | 0 | 0 | 0 | not significant |
| 3203 | GO_MITOTIC_NUCLEAR_DIVISION                                | -1.27 | 1.55 | 0 | 0 | 0 | not significant |
| 3204 | GO_PHOSPHORIC_ESTER_HYDROLASE_ACTIVITY                     | -1.27 | 1.37 | 0 | 0 | 0 | not significant |
| 3205 | GRAESSMANN_APOPTOSIS_BY_SERUM_DEPRIVATION_DN               | -1.27 | 1.34 | 0 | 0 | 0 | not significant |
| 3206 | GO_MIDBODY                                                 | -1.27 | 1.23 | 0 | 0 | 0 | not significant |
| 3207 | GO_REGULATION_OF_ENDOTHELIAL_CELL_MIGRATION                | -1.27 | 1.23 | 0 | 0 | 0 | not significant |
| 3208 | GO_REGULATION_OF_EPITHELIAL_CELL_MIGRATION                 | -1.27 | 1.21 | 0 | 0 | 0 | not significant |
| 3209 | PRC2_EZH2_UP_V1_UP                                         | -1.27 | 1.20 | 0 | 0 | 0 | not significant |
| 3210 | SASSON_RESPONSE_TO_FORSKOLIN_UP                            | -1.27 | 1.20 | 0 | 0 | 0 | not significant |
| 3211 | GO_ORGANELLE_FUSION                                        | -1.27 | 1.12 | 0 | 0 | 0 | not significant |
| 3212 | GO_ENDOTHELIAL_CELL_MIGRATION                              | -1.27 | 1.11 | 0 | 0 | 0 | not significant |
| 3213 | GO_HISTONE_DEACETYLASE_BINDING                             | -1.27 | 1.10 | 0 | 0 | 0 | not significant |
| 3214 | WIERENGA_STAT5A_TARGETS_GROUP1                             | -1.27 | 1.05 | 0 | 0 | 0 | not significant |
| 3215 | P53_DN.V2_DN                                               | -1.27 | 1.03 | 0 | 0 | 0 | not significant |
| 3216 | TOOKER_GEMCITABINE_RESISTANCE_UP                           | -1.27 | 1.00 | 0 | 0 | 0 | not significant |
| 3217 | GO_POSITIVE_REGULATION_OF_COLD_INDUCED_THERMOGENESIS       | -1.27 | 0.99 | 0 | 0 | 0 | not significant |
| 3218 | CHR9Q33                                                    | -1.27 | 0.98 | 0 | 0 | 0 | not significant |
| 3219 | COLDREN_GEFITINIB_RESISTANCE_UP                            | -1.27 | 0.97 | 0 | 0 | 0 | not significant |
| 3220 | KAUFFMANN_MELANOMA_RELAPSE_UP                              | -1.27 | 0.96 | 0 | 0 | 0 | not significant |
| 3221 | GO_NEUROMUSCULAR_PROCESS                                   | -1.27 | 0.94 | 0 | 0 | 0 | not significant |
| 3222 | PTEN_DN.V1_DN                                              | -1.27 | 0.94 | 0 | 0 | 0 | not significant |
| 3223 | GO_MICROBODY_MEMBRANE                                      | -1.27 | 0.93 | 0 | 0 | 0 | not significant |
| 3224 | LUCAS_HNF4A_TARGETS_UP                                     | -1.27 | 0.92 | 0 | 0 | 0 | not significant |
| 3225 | KEGG_AMINO_SUGAR_AND_NUCLEOTIDE_SUGAR_METABOLISM           | -1.27 | 0.89 | 0 | 0 | 0 | not significant |
| 3226 | ZHU_CMV_24_HR_DN                                           | -1.27 | 0.89 | 0 | 0 | 0 | not significant |
| 3227 | BARRIER_COLON_CANCER_RECURRENCE_UP                         | -1.27 | 0.88 | 0 | 0 | 0 | not significant |
| 3228 | GO_HEAD_MORPHOGENESIS                                      | -1.27 | 0.86 | 0 | 0 | 0 | not significant |
| 3229 | GO_POSITIVE_REGULATION_OF_TRANSCRIPTION_FROM_RNA_POLYMER   | -1.27 | 0.86 | 0 | 0 | 0 | not significant |
| 3230 | GO_POSITIVE_REGULATION_OF_CALCIIUM_ION_TRANSMEMBRANE_TRAN  | -1.27 | 0.85 | 0 | 0 | 0 | not significant |
| 3231 | PLASARI_TGFB1_SIGNALING_VIA_NFIC_1HR_UP                    | -1.27 | 0.84 | 0 | 0 | 0 | not significant |
| 3232 | CHR12Q14                                                   | -1.27 | 0.83 | 0 | 0 | 0 | not significant |
| 3233 | GO_POSITIVE_REGULATION_OF_IMMUNOGLOBULIN_PRODUCTION        | -1.27 | 0.83 | 0 | 0 | 0 | not significant |
| 3234 | GO_REGULATION_OF_DNA_TEMPLATED_TRANSCRIPTION_INITIATION    | -1.27 | 0.83 | 0 | 0 | 0 | not significant |
| 3235 | KEGG_CYTOSOLIC_DNA_SENSING_PATHWAY                         | -1.27 | 0.83 | 0 | 0 | 0 | not significant |
| 3236 | GO_FATTY_ACYL_COA_BINDING                                  | -1.27 | 0.81 | 0 | 0 | 0 | not significant |
| 3237 | GO_MEMBRANE_RAFT_ORGANIZATION                              | -1.27 | 0.81 | 0 | 0 | 0 | not significant |
| 3238 | GO_TRANSCRIPTION_ELONGATION_FROM_RNA_POLYMERASE_I_PROMC    | -1.27 | 0.81 | 0 | 0 | 0 | not significant |
| 3239 | GO_POTASSIUM_CHANNEL_COMPLEX                               | -1.27 | 0.80 | 0 | 0 | 0 | not significant |
| 3240 | OSADA_ASCL1_TARGETS_UP                                     | -1.27 | 0.80 | 0 | 0 | 0 | not significant |
| 3241 | GO_NEURON_CELLULAR_HOMEOSTASIS                             | -1.27 | 0.79 | 0 | 0 | 0 | not significant |
| 3242 | GO_POSITIVE_REGULATION_OF_SUBSTRATE_ADHESION_DEPENDENT_C   | -1.27 | 0.79 | 0 | 0 | 0 | not significant |
| 3243 | GO_SUMO_BINDING                                            | -1.27 | 0.79 | 0 | 0 | 0 | not significant |
| 3244 | REACTOME_NON_INTEGRIN_MEMBRANE_ECM_INTERACTIONS            | -1.27 | 0.79 | 0 | 0 | 0 | not significant |
| 3245 | GO_NCRNA_CATABOLIC_PROCESS                                 | -1.27 | 0.78 | 0 | 0 | 0 | not significant |
| 3246 | GO_ADENYLYLTRANSFERASE_ACTIVITY                            | -1.27 | 0.77 | 0 | 0 | 0 | not significant |
| 3247 | GO_REGULATION_OF_CELLULAR_RESPONSE_TO_DRUG                 | -1.27 | 0.76 | 0 | 0 | 0 | not significant |
| 3248 | GO_OUTER_MITOCHONDRIAL_MEMBRANE_PROTEIN_COMPLEX            | -1.27 | 0.75 | 0 | 0 | 0 | not significant |
| 3249 | GO_MITOCHONDRIAL_OUTER_MEMBRANE_TRANSLCLEASE_COMPLEX       | -1.27 | 0.74 | 0 | 0 | 0 | not significant |
| 3250 | GO_POSITIVE_REGULATION_OF_PEPTIDYL_THREONINE_PHOSPHORYLA   | -1.27 | 0.74 | 0 | 0 | 0 | not significant |
| 3251 | GO_POSITIVE_REGULATION_OF_SEQUESTERING_OF_CALCIIUM_ION     | -1.27 | 0.74 | 0 | 0 | 0 | not significant |
| 3252 | GO_PTERIDINE_CONTAINING_COMPOUND_BIOSYNTHETIC_PROCESS      | -1.27 | 0.74 | 0 | 0 | 0 | not significant |
| 3253 | GO_AP_2_ADAPTOR_COMPLEX_BINDING                            | -1.27 | 0.73 | 0 | 0 | 0 | not significant |
| 3254 | PODAR_RESPONSE_TO_ADAPHOSTIN_DN                            | -1.27 | 0.73 | 0 | 0 | 0 | not significant |
| 3255 | REACTOME_RNF_MUTANTS_SHOW_ENHANCED_WNT_SIGNALING_AND_P     | -1.27 | 0.73 | 0 | 0 | 0 | not significant |
| 3256 | GO_COPII_COATED_VESICLE_CARGO_LOADING                      | -1.27 | 0.72 | 0 | 0 | 0 | not significant |
| 3257 | GO_REGULATION_OF_PINOCYTOSIS                               | -1.27 | 0.72 | 0 | 0 | 0 | not significant |
| 3258 | KUROZUMI_RESPONSE_TO_ONCOCYTIC_VIRUS_AND_CYCLIC_RGD        | -1.27 | 0.72 | 0 | 0 | 0 | not significant |

|      |                                                            |       |      |   |   |   |                 |
|------|------------------------------------------------------------|-------|------|---|---|---|-----------------|
| 3259 | GO_REGULATION_OF_HOMOTYPIC_CELL_CELL_ADHESION              | -1.27 | 0.71 | 0 | 0 | 0 | not significant |
| 3260 | REACTOME_2_LTR_CIRCLE_FORMATION                            | -1.27 | 0.71 | 0 | 0 | 0 | not significant |
| 3261 | REACTOME_METHYLATION                                       | -1.27 | 0.71 | 0 | 0 | 0 | not significant |
| 3262 | GO_EPITHELIAL_CELL_FATE_COMMITMENT                         | -1.27 | 0.70 | 0 | 0 | 0 | not significant |
| 3263 | GO_CDP_DIACYLGLYCEROL_BIOSYNTHETIC_PROCESS                 | -1.27 | 0.69 | 0 | 0 | 0 | not significant |
| 3264 | GO_NEGATIVE_REGULATION_OF_DENDRITE_MORPHOGENESIS           | -1.27 | 0.69 | 0 | 0 | 0 | not significant |
| 3265 | GO_SPINDLE_MIDZONE_ASSEMBLY                                | -1.27 | 0.69 | 0 | 0 | 0 | not significant |
| 3266 | GO_BRANCH_ELONGATION_OF_AN_EPITHELIUM                      | -1.27 | 0.68 | 0 | 0 | 0 | not significant |
| 3267 | GO_MEIOTIC_SPINDLE                                         | -1.27 | 0.68 | 0 | 0 | 0 | not significant |
| 3268 | GO_SMALL_PROTEIN_ACTIVATING_ENZYME_BINDING                 | -1.27 | 0.68 | 0 | 0 | 0 | not significant |
| 3269 | REACTOME_ACTIVATION_OF_RAS_IN_B_CELLS                      | -1.27 | 0.68 | 0 | 0 | 0 | not significant |
| 3270 | GO_MACROPHAGE_APOPTOTIC_PROCESS                            | -1.27 | 0.67 | 0 | 0 | 0 | not significant |
| 3271 | GO_NEGATIVE_REGULATION_OF_INTERLEUKIN_17_PRODUCTION        | -1.27 | 0.67 | 0 | 0 | 0 | not significant |
| 3272 | GO_RAGE_RECEPTOR_BINDING                                   | -1.27 | 0.67 | 0 | 0 | 0 | not significant |
| 3273 | GO_RESPONSE_TO_ISOLATION_STRESS                            | -1.27 | 0.67 | 0 | 0 | 0 | not significant |
| 3274 | GO_PROTEIN_NITROSYLATION                                   | -1.27 | 0.66 | 0 | 0 | 0 | not significant |
| 3275 | GO_TRANSCRIPTIONAL_PREINITIATION_COMPLEX                   | -1.27 | 0.63 | 0 | 0 | 0 | not significant |
| 3276 | GO_NEGATIVE_REGULATION_OF_MOLECULAR_FUNCTION               | -1.26 | 4.00 | 0 | 0 | 0 | not significant |
| 3277 | GO_INORGANIC_ION_TRANSMEMBRANE_TRANSPORT                   | -1.26 | 2.01 | 0 | 0 | 0 | not significant |
| 3278 | RODWELL_AGING_KIDNEY_UP                                    | -1.26 | 1.78 | 0 | 0 | 0 | not significant |
| 3279 | GO_POLYMERIC_CYTOSKELETAL_FIBER                            | -1.26 | 1.76 | 0 | 0 | 0 | not significant |
| 3280 | GO_BLOOD_VESSEL_MORPHOGENESIS                              | -1.26 | 1.56 | 0 | 0 | 0 | not significant |
| 3281 | RIGGI_EWING_SARCOMA_PROGENITOR_UP                          | -1.26 | 1.42 | 0 | 0 | 0 | not significant |
| 3282 | GO_MEMBRANE_REGION                                         | -1.26 | 1.41 | 0 | 0 | 0 | not significant |
| 3283 | GO_CELLULAR_RESPONSE_TO_REACTIVE_OXYGEN_SPECIES            | -1.26 | 1.37 | 0 | 0 | 0 | not significant |
| 3284 | YAMAZAKI_TCEB3_TARGETS_DN                                  | -1.26 | 1.37 | 0 | 0 | 0 | not significant |
| 3285 | WALLACE_PROSTATE_CANCER_RACE_UP                            | -1.26 | 1.27 | 0 | 0 | 0 | not significant |
| 3286 | CHR3P21                                                    | -1.26 | 1.25 | 0 | 0 | 0 | not significant |
| 3287 | PANGAS_TUMOR_SUPPRESSION_BY_SMAD1_AND_SMAD5_DN             | -1.26 | 1.25 | 0 | 0 | 0 | not significant |
| 3288 | REACTOME_ONCOGENIC_MAPK_SIGNALING                          | -1.26 | 1.08 | 0 | 0 | 0 | not significant |
| 3289 | GO_MULTICELLULAR_ORGANISMAL_SIGNALING                      | -1.26 | 1.05 | 0 | 0 | 0 | not significant |
| 3290 | MILI_PSEUDOPODIA_CHEMOTAXIS_UP                             | -1.26 | 1.05 | 0 | 0 | 0 | not significant |
| 3291 | SEIDEN_ONCOGENESIS_BY_MET                                  | -1.26 | 1.03 | 0 | 0 | 0 | not significant |
| 3292 | LANDIS_ERBB2_BREAST_TUMORS_324_UP                          | -1.26 | 1.00 | 0 | 0 | 0 | not significant |
| 3293 | GO_CYTOSKELETON_DEPENDENT_CYTOKINESIS                      | -1.26 | 0.98 | 0 | 0 | 0 | not significant |
| 3294 | GO_POSITIVE_REGULATION_OF_PRODUCTION_OF_MOLECULAR_MEDIAT   | -1.26 | 0.98 | 0 | 0 | 0 | not significant |
| 3295 | MAYBURD_RESPONSE_TO_L6683536_DN                            | -1.26 | 0.98 | 0 | 0 | 0 | not significant |
| 3296 | GO_INTRAMOLECULAR_OXIDOREDUCTASE_ACTIVITY                  | -1.26 | 0.94 | 0 | 0 | 0 | not significant |
| 3297 | GO_ATPASE_REGULATOR_ACTIVITY                               | -1.26 | 0.93 | 0 | 0 | 0 | not significant |
| 3298 | PID_THROMBIN_PAR1_PATHWAY                                  | -1.26 | 0.93 | 0 | 0 | 0 | not significant |
| 3299 | BERNARD_PPAPDC1B_TARGETS_DN                                | -1.26 | 0.92 | 0 | 0 | 0 | not significant |
| 3300 | IZADPANAH_STEM_CELL_ADIPOSE_VS_BONE_DN                     | -1.26 | 0.92 | 0 | 0 | 0 | not significant |
| 3301 | KEGG_TYPE_II_DIABETES_MELLITUS                             | -1.26 | 0.91 | 0 | 0 | 0 | not significant |
| 3302 | GAUSSMANN_MLL_AF4_FUSION_TARGETS_A_DN                      | -1.26 | 0.89 | 0 | 0 | 0 | not significant |
| 3303 | GO_HISTONE_EXCHANGE                                        | -1.26 | 0.83 | 0 | 0 | 0 | not significant |
| 3304 | GO_NEGATIVE_REGULATION_OF_TOR_SIGNALING                    | -1.26 | 0.83 | 0 | 0 | 0 | not significant |
| 3305 | HINATA_NFKB_TARGETS_KERATINOCYTE_UP                        | -1.26 | 0.83 | 0 | 0 | 0 | not significant |
| 3306 | GALLUZZI_PERMEABILIZE_MITOCHONDRIA                         | -1.26 | 0.82 | 0 | 0 | 0 | not significant |
| 3307 | GO_NEGATIVE_REGULATION_OF_RNA_SPLICING                     | -1.26 | 0.81 | 0 | 0 | 0 | not significant |
| 3308 | GO_PROTEIN_REFOLDING                                       | -1.26 | 0.81 | 0 | 0 | 0 | not significant |
| 3309 | YIH_RESPONSE_TO_ARSENITE_C3                                | -1.26 | 0.81 | 0 | 0 | 0 | not significant |
| 3310 | BROWNE_HCMV_INFECTION_1HR_UP                               | -1.26 | 0.80 | 0 | 0 | 0 | not significant |
| 3311 | GO_REGULATION_OF_CELL_MIGRATION_INVOLVED_IN_SPROUTING_ANC  | -1.26 | 0.80 | 0 | 0 | 0 | not significant |
| 3312 | SCHLESINGER_METHYLATED_DE_NOVO_IN_CANCER                   | -1.26 | 0.80 | 0 | 0 | 0 | not significant |
| 3313 | GO_ENDOCRINE_PANCREAS_DEVELOPMENT                          | -1.26 | 0.79 | 0 | 0 | 0 | not significant |
| 3314 | REACTOME_SYNDENCAN_INTERACTIONS                            | -1.26 | 0.78 | 0 | 0 | 0 | not significant |
| 3315 | VALK_AML_CLUSTER_11                                        | -1.26 | 0.78 | 0 | 0 | 0 | not significant |
| 3316 | CERIBELLI_PROMOTERS_INACTIVE_AND_BOUND_BY_NFY              | -1.26 | 0.77 | 0 | 0 | 0 | not significant |
| 3317 | GO_REGULATION_OF_PROTEIN_LOCALIZATION_TO_CELL_SURFACE      | -1.26 | 0.77 | 0 | 0 | 0 | not significant |
| 3318 | GO_REGULATION_OF_OXIDATIVE_STRESS_INDUCED_INTRINSIC_APOPTC | -1.26 | 0.76 | 0 | 0 | 0 | not significant |
| 3319 | HOFMANN_MYELODYSPLASTIC_SYNDROM_RISK_UP                    | -1.26 | 0.76 | 0 | 0 | 0 | not significant |
| 3320 | TURASHVILI_BREAST_DUCTAL_CARCINOMA_VS_LOBULAR_NORMAL_DN    | -1.26 | 0.76 | 0 | 0 | 0 | not significant |
| 3321 | GO_MYOFIBRIL_ASSEMBLY                                      | -1.26 | 0.75 | 0 | 0 | 0 | not significant |
| 3322 | GO_POSITIVE_REGULATION_OF_TOLL LIKE RECEPTOR SIGNALING PA  | -1.26 | 0.75 | 0 | 0 | 0 | not significant |
| 3323 | REACTOME_RORA_ACTIVATES_GENE_EXPRESSION                    | -1.26 | 0.75 | 0 | 0 | 0 | not significant |
| 3324 | GO_ACETYLCHOLINE_GATED_CHANNEL_COMPLEX                     | -1.26 | 0.74 | 0 | 0 | 0 | not significant |
| 3325 | GO_FOREBRAIN_NEURON_DIFFERENTIATION                        | -1.26 | 0.74 | 0 | 0 | 0 | not significant |
| 3326 | GO_PSEUDOPODIUM_ORGANIZATION                               | -1.26 | 0.74 | 0 | 0 | 0 | not significant |
| 3327 | GO_POLYAMINE_BIOSYNTHETIC_PROCESS                          | -1.26 | 0.73 | 0 | 0 | 0 | not significant |
| 3328 | GO_TRNA_CATABOLIC_PROCESS                                  | -1.26 | 0.73 | 0 | 0 | 0 | not significant |
| 3329 | GO_RESPONSE_TO_CAFFEINE                                    | -1.26 | 0.72 | 0 | 0 | 0 | not significant |
| 3330 | GO_MODIFIED_AMINO_ACID_TRANSMEMBRANE_TRANSPORTER_ACTIVIT   | -1.26 | 0.71 | 0 | 0 | 0 | not significant |
| 3331 | GO_RESPONSE_TO_L GLUTAMATE                                 | -1.26 | 0.71 | 0 | 0 | 0 | not significant |
| 3332 | KUROKAWA_LIVER_CANCER_CHEMOTHERAPY_UP                      | -1.26 | 0.71 | 0 | 0 | 0 | not significant |
| 3333 | ZIRN_TRETINOIN_RESPONSE_UP                                 | -1.26 | 0.70 | 0 | 0 | 0 | not significant |
| 3334 | GO_CHEMOKINE_C_C_MOTIF_LIGAND_2_SECRETION                  | -1.26 | 0.69 | 0 | 0 | 0 | not significant |
| 3335 | GO_OXIDOREDUCTASE_ACTIVITY_ACTING_ON_NAD_P_H_HEME_PROTEIN  | -1.26 | 0.69 | 0 | 0 | 0 | not significant |
| 3336 | GO_PROSTANOID_BIOSYNTHETIC_PROCESS                         | -1.26 | 0.69 | 0 | 0 | 0 | not significant |
| 3337 | REACTOME_SHC1_EVENTS_IN_EGFR_SIGNALING                     | -1.26 | 0.69 | 0 | 0 | 0 | not significant |
| 3338 | GO_MITOTIC_NUCLEAR_ENVELOPE_REASSEMBLY                     | -1.26 | 0.68 | 0 | 0 | 0 | not significant |
| 3339 | GO_NEGATIVE_REGULATION_OF_PROGRAMMED_NECROTIC_CELL_DEA     | -1.26 | 0.68 | 0 | 0 | 0 | not significant |
| 3340 | GO_REGULATION_OF_PROTEIN_LOCALIZATION_TO_NUCLEOLUS         | -1.26 | 0.68 | 0 | 0 | 0 | not significant |
| 3341 | GO_POSITIVE_REGULATION_OF_MUSCLE_ADAPTATION                | -1.26 | 0.67 | 0 | 0 | 0 | not significant |
| 3342 | REACTOME_KETONE_BODY_METABOLISM                            | -1.26 | 0.67 | 0 | 0 | 0 | not significant |
| 3343 | GO_REGULATION_OF_PROTEIN_HETERODIMERIZATION_ACTIVITY       | -1.26 | 0.66 | 0 | 0 | 0 | not significant |
| 3344 | GO_SODIUM_ION_EXPORT_ACROSS_PLASMA_MEMBRANE                | -1.26 | 0.65 | 0 | 0 | 0 | not significant |
| 3345 | GO_MAINTENANCE_OF_CENTROSOME_LOCATION                      | -1.26 | 0.64 | 0 | 0 | 0 | not significant |
| 3346 | REACTOME_ACTIVATED_NTRK3_SIGNALS_THROUGH_RAS               | -1.26 | 0.63 | 0 | 0 | 0 | not significant |
| 3347 | REACTOME_P75NTR_REGULATES_AXONOGENESIS                     | -1.26 | 0.63 | 0 | 0 | 0 | not significant |
| 3348 | GO_L_PHENYLALANINE_CATABOLIC_PROCESS                       | -1.26 | 0.62 | 0 | 0 | 0 | not significant |
| 3349 | GO_REGULATION_OF_CATABOLIC_PROCESS                         | -1.25 | 4.00 | 0 | 0 | 0 | not significant |
| 3350 | MARTINEZ_RB1_TARGETS_UP                                    | -1.25 | 4.00 | 0 | 0 | 0 | not significant |
| 3351 | GO_NEGATIVE_REGULATION_OF_CATALYTIC_ACTIVITY               | -1.25 | 2.29 | 0 | 0 | 0 | not significant |
| 3352 | GO_METHYLATION                                             | -1.25 | 1.68 | 0 | 0 | 0 | not significant |
| 3353 | GO_MICROTUBULE                                             | -1.25 | 1.68 | 0 | 0 | 0 | not significant |
| 3354 | GO_ACTIVATION_OF_IMMUNE_RESPONSE                           | -1.25 | 1.60 | 0 | 0 | 0 | not significant |
| 3355 | GO_CHROMOSOMAL_REGION                                      | -1.25 | 1.58 | 0 | 0 | 0 | not significant |
| 3356 | GO_ORGANIC_HYDROXY_COMPOUND_METABOLIC_PROCESS              | -1.25 | 1.56 | 0 | 0 | 0 | not significant |
| 3357 | GO_POSITIVE_REGULATION_OF_PROTEOLYSIS                      | -1.25 | 1.53 | 0 | 0 | 0 | not significant |
| 3358 | GO_IMMUNE_RESPONSE_REGULATING_CELL_SURFACE_RECEPTOR_SIC    | -1.25 | 1.52 | 0 | 0 | 0 | not significant |
| 3359 | GO_VIRAL_LIFE_CYCLE                                        | -1.25 | 1.49 | 0 | 0 | 0 | not significant |
| 3360 | GO_PROTEIN_MODIFICATION_BY_SMALL_PROTEIN_REMOVAL           | -1.25 | 1.48 | 0 | 0 | 0 | not significant |
| 3361 | GO_CALCIIUM_ION_TRANSMEMBRANE_TRANSPORT                    | -1.25 | 1.32 | 0 | 0 | 0 | not significant |
| 3362 | GO_MRNA_BINDING                                            | -1.25 | 1.28 | 0 | 0 | 0 | not significant |
| 3363 | GO_RESPONSE_TO_ALCOHOL                                     | -1.25 | 1.18 | 0 | 0 | 0 | not significant |
| 3364 | MASSARWEH_TAMOXIFEN_RESISTANCE_DN                          | -1.25 | 1.18 | 0 | 0 | 0 | not significant |
| 3365 | SHEPARD_CRUSH_AND_BURN_MUTANT_DN                           | -1.25 | 1.16 | 0 | 0 | 0 | not significant |
| 3366 | HALLMARK_KRAS_SIGNALING_UP                                 | -1.25 | 1.15 | 0 | 0 | 0 | not significant |
| 3367 | KUMAR_PATHOGEN_LOAD_BY_MACROPHAGES                         | -1.25 | 1.12 | 0 | 0 | 0 | not significant |



|      |                                                             |       |      |   |   |   |                 |
|------|-------------------------------------------------------------|-------|------|---|---|---|-----------------|
| 3368 | RODRIGUES NTN1_TARGETS_DN                                   | -1.25 | 1.11 | 0 | 0 | 0 | not significant |
| 3369 | REACTOME_FACTORS_INVOLVED_IN_MEGAKARYOCYTE_DEVELOPMENT      | -1.25 | 1.10 | 0 | 0 | 0 | not significant |
| 3370 | WIERENGA_STATSA_TARGETS_UP                                  | -1.25 | 1.10 | 0 | 0 | 0 | not significant |
| 3371 | GUO_TARGETS_OF_IRS1_AND_IRS2                                | -1.25 | 1.08 | 0 | 0 | 0 | not significant |
| 3372 | GO_POSITIVE_REGULATION_OF_VASCULATURE_DEVELOPMENT           | -1.25 | 1.05 | 0 | 0 | 0 | not significant |
| 3373 | YAMAZAKI_TCEB3_TARGETS_UP                                   | -1.25 | 1.04 | 0 | 0 | 0 | not significant |
| 3374 | GO_TISSUE_HOMEOSTASIS                                       | -1.25 | 1.02 | 0 | 0 | 0 | not significant |
| 3375 | CHENG_IMPRINTED_BY ESTRADIOL                                | -1.25 | 0.98 | 0 | 0 | 0 | not significant |
| 3376 | GO_PROTEIN_LOCALIZATION_TO_CHROMOSOME                       | -1.25 | 0.98 | 0 | 0 | 0 | not significant |
| 3377 | KEGG_VASCULAR_SMOOTH_MUSCLE_CONTRACTION                     | -1.25 | 0.97 | 0 | 0 | 0 | not significant |
| 3378 | GO_REGULATION_OF_REPRODUCTIVE_PROCESS                       | -1.25 | 0.96 | 0 | 0 | 0 | not significant |
| 3379 | GO_NUCLEOSOME_BINDING                                       | -1.25 | 0.94 | 0 | 0 | 0 | not significant |
| 3380 | GRAHAM_CML_DIVIDING_VS_NORMAL_QUIESCENT_DN                  | -1.25 | 0.92 | 0 | 0 | 0 | not significant |
| 3381 | GO_NEPHRON_EPITHELIUM_DEVELOPMENT                           | -1.25 | 0.91 | 0 | 0 | 0 | not significant |
| 3382 | ISHIDA_E2F_TARGETS                                          | -1.25 | 0.86 | 0 | 0 | 0 | not significant |
| 3383 | LIEN_BREAST_CARCINOMA_METAPLASTIC_VS_DUCTAL_UP              | -1.25 | 0.86 | 0 | 0 | 0 | not significant |
| 3384 | GO_SISTER_CHROMATID_COHESION                                | -1.25 | 0.85 | 0 | 0 | 0 | not significant |
| 3385 | GO_PROTEIN_TYROSINE_SERINE_THREONINE_PHOSPHATASE_ACTIVITY   | -1.25 | 0.84 | 0 | 0 | 0 | not significant |
| 3386 | REACTOME_CA2PLUS_PATHWAY                                    | -1.25 | 0.84 | 0 | 0 | 0 | not significant |
| 3387 | GO_REGULATION_OF_NITRIC_OXIDE_SYNTHASE_ACTIVITY             | -1.25 | 0.83 | 0 | 0 | 0 | not significant |
| 3388 | MALONEY_RESPONSE_TO_17AAG_UP                                | -1.25 | 0.83 | 0 | 0 | 0 | not significant |
| 3389 | TURASHVILI_BREAST_LOBULAR_CARCINOMA_VS_LOBULAR_NORMAL_UP    | -1.25 | 0.83 | 0 | 0 | 0 | not significant |
| 3390 | ZHU_CMV_8_HR_UP                                             | -1.25 | 0.83 | 0 | 0 | 0 | not significant |
| 3391 | TURASHVILI_BREAST_LOBULAR_CARCINOMA_VS_DUCTAL_NORMAL_UP     | -1.25 | 0.82 | 0 | 0 | 0 | not significant |
| 3392 | PID_RET_PATHWAY                                             | -1.25 | 0.80 | 0 | 0 | 0 | not significant |
| 3393 | DORN_ADENOVIRUS_INFECTION_48HR_DN                           | -1.25 | 0.79 | 0 | 0 | 0 | not significant |
| 3394 | GO_ANCHORED_COMPONENT_OF_PLASMA_MEMBRANE                    | -1.25 | 0.79 | 0 | 0 | 0 | not significant |
| 3395 | GO_POSITIVE_CHEMOTAXIS                                      | -1.25 | 0.79 | 0 | 0 | 0 | not significant |
| 3396 | GO_RESPONSE_TO_ANESTHETIC                                   | -1.25 | 0.78 | 0 | 0 | 0 | not significant |
| 3397 | REACTOME_SUMOYLATION_OF_INTRACELLULAR_RECEPTORS             | -1.25 | 0.78 | 0 | 0 | 0 | not significant |
| 3398 | KEGG_BUTANOATE_METABOLISM                                   | -1.25 | 0.77 | 0 | 0 | 0 | not significant |
| 3399 | GO_POSITIVE_REGULATION_OF_LAMELLIPODIUM_ORGANIZATION        | -1.25 | 0.76 | 0 | 0 | 0 | not significant |
| 3400 | GO_REGULATION_OF_HELICASE_ACTIVITY                          | -1.25 | 0.76 | 0 | 0 | 0 | not significant |
| 3401 | REACTOME_CARBOXYTERMINAL_POST_TRANSLATIONAL_MODIFICATION    | -1.25 | 0.76 | 0 | 0 | 0 | not significant |
| 3402 | REACTOME_RHO_GTPASES_ACTIVATE_ROCKS                         | -1.25 | 0.76 | 0 | 0 | 0 | not significant |
| 3403 | ANASTASSIOU_CANCER_MESENCHYMAL_TRANSITION_SIGNATURE         | -1.25 | 0.75 | 0 | 0 | 0 | not significant |
| 3404 | GO_RESPONSE_TO_VITAMIN_D                                    | -1.25 | 0.75 | 0 | 0 | 0 | not significant |
| 3405 | GO_ALPHA_LINOLENIC_ACID_METABOLIC_PROCESS                   | -1.25 | 0.73 | 0 | 0 | 0 | not significant |
| 3406 | GO_ENTRAINMENT_OF_CIRCADIAN_CLOCK                           | -1.25 | 0.73 | 0 | 0 | 0 | not significant |
| 3407 | GO_NEGATIVE_REGULATION_OF_ALPHA_BETA_T_CELL_DIFFERENTIATION | -1.25 | 0.73 | 0 | 0 | 0 | not significant |
| 3408 | GO_CELL_COMMUNICATION_BY_ELECTRICAL_COUPLING                | -1.25 | 0.72 | 0 | 0 | 0 | not significant |
| 3409 | GO_EYE_PHOTORECEPTOR_CELL_DEVELOPMENT                       | -1.25 | 0.72 | 0 | 0 | 0 | not significant |
| 3410 | GO_NEGATIVE_REGULATION_OF_SIGNAL_TRANSDUCTION_IN_ABSENCE    | -1.25 | 0.72 | 0 | 0 | 0 | not significant |
| 3411 | GO_REGULATION_OF_MICROTUBULE_DEPOLYMERIZATION               | -1.25 | 0.72 | 0 | 0 | 0 | not significant |
| 3412 | REACTOME_ZINC_INFLUX_INTO_CELLS_BY_THE_SLC39_GENE_FAMILY    | -1.25 | 0.71 | 0 | 0 | 0 | not significant |
| 3413 | GO_PROTEIN_KINASE_A_CATALYTIC_SUBUNIT_BINDING               | -1.25 | 0.70 | 0 | 0 | 0 | not significant |
| 3414 | GO_RESPONSE_TO_PLATELET_DERIVED_GROWTH_FACTOR               | -1.25 | 0.70 | 0 | 0 | 0 | not significant |
| 3415 | GO_RESPONSE_TO_OLEIC_ACID                                   | -1.25 | 0.69 | 0 | 0 | 0 | not significant |
| 3416 | GO_NEGATIVE_REGULATION_OF_CARTILAGE_DEVELOPMENT             | -1.25 | 0.68 | 0 | 0 | 0 | not significant |
| 3417 | GO_NEGATIVE_REGULATION_OF_CHONDROCYTE_DIFFERENTIATION       | -1.25 | 0.68 | 0 | 0 | 0 | not significant |
| 3418 | GO_PROTEIN_CONTAINING_COMPLEX_REMODELING                    | -1.25 | 0.68 | 0 | 0 | 0 | not significant |
| 3419 | GARGALOVIC_RESPONSE_TO_OXIDIZED_PHOSPHOLIPIDS_BLACK_DN      | -1.25 | 0.67 | 0 | 0 | 0 | not significant |
| 3420 | GAUTSCHI_SRC_SIGNALING                                      | -1.25 | 0.67 | 0 | 0 | 0 | not significant |
| 3421 | GO_POSITIVE_REGULATION_OF_MONOCYTE_DIFFERENTIATION          | -1.25 | 0.67 | 0 | 0 | 0 | not significant |
| 3422 | GO_POSITIVE_REGULATION_OF_NITRIC_OXIDE_SYNTHASE_BIOSYNTHET  | -1.25 | 0.67 | 0 | 0 | 0 | not significant |
| 3423 | BIOCARTA_RB_PATHWAY                                         | -1.25 | 0.66 | 0 | 0 | 0 | not significant |
| 3424 | GO_S_SHAPE_BODY_MORPHOGENESIS                               | -1.25 | 0.65 | 0 | 0 | 0 | not significant |
| 3425 | WORSCHER_TUMOR_REJECTION_DN                                 | -1.25 | 0.65 | 0 | 0 | 0 | not significant |
| 3426 | GO_REGULATION_OF_DNA_CATABOLIC_PROCESS                      | -1.25 | 0.64 | 0 | 0 | 0 | not significant |
| 3427 | REACTOME_PHENYLALANINE_AND_TYROSINE_METABOLISM              | -1.25 | 0.64 | 0 | 0 | 0 | not significant |
| 3428 | GO_ACTIVATION_INDUCED_CELL_DEATH_OF_T_CELLS                 | -1.25 | 0.63 | 0 | 0 | 0 | not significant |
| 3429 | GO_REGULATION_OF_MITOCHONDRIAL_ATP_SYNTHESIS_COUPLED_ELE    | -1.25 | 0.63 | 0 | 0 | 0 | not significant |
| 3430 | GO_HIGH_DENSITY_LIPOPROTEIN_PARTICLE_REMODELING             | -1.25 | 0.62 | 0 | 0 | 0 | not significant |
| 3431 | REACTOME_ACTIVATED_NTRK2_SIGNALS_THROUGH_RAS                | -1.25 | 0.62 | 0 | 0 | 0 | not significant |
| 3432 | GO_ENDOCYTTIC_ADAPTOR_ACTIVITY                              | -1.25 | 0.60 | 0 | 0 | 0 | not significant |
| 3433 | PILON_KLF1_TARGETS_DN                                       | -1.24 | 4.00 | 0 | 0 | 0 | not significant |
| 3434 | GO_MEMBRANE_PROTEIN_COMPLEX                                 | -1.24 | 2.14 | 0 | 0 | 0 | not significant |
| 3435 | GO_REGULATION_OF_ANATOMICAL_STRUCTURE_MORPHOGENESIS         | -1.24 | 2.14 | 0 | 0 | 0 | not significant |
| 3436 | GO_SECRETION                                                | -1.24 | 1.92 | 0 | 0 | 0 | not significant |
| 3437 | WANG_LMO4_TARGETS_DN                                        | -1.24 | 1.61 | 0 | 0 | 0 | not significant |
| 3438 | GO_ACTIN_FILAMENT_ORGANIZATION                              | -1.24 | 1.52 | 0 | 0 | 0 | not significant |
| 3439 | GO_REGULATION_OF_BINDING                                    | -1.24 | 1.50 | 0 | 0 | 0 | not significant |
| 3440 | GO_SMALL_MOLECULE_CATABOLIC_PROCESS                         | -1.24 | 1.43 | 0 | 0 | 0 | not significant |
| 3441 | GO_REGULATION_OF_MULTI_ORGANISM_PROCESS                     | -1.24 | 1.42 | 0 | 0 | 0 | not significant |
| 3442 | RUTELLA_RESPONSE_TO_CSF2RB_AND_IL4_UP                       | -1.24 | 1.42 | 0 | 0 | 0 | not significant |
| 3443 | GO_MUSCLE_ORGAN_DEVELOPMENT                                 | -1.24 | 1.31 | 0 | 0 | 0 | not significant |
| 3444 | GO_PROTEIN_DNA_COMPLEX_SUBUNIT_ORGANIZATION                 | -1.24 | 1.26 | 0 | 0 | 0 | not significant |
| 3445 | GO_REGULATION_OF_PROTEIN_STABILITY                          | -1.24 | 1.26 | 0 | 0 | 0 | not significant |
| 3446 | HAHTOLA_MYCOSIS_FUNGOIDES_SKIN_UP                           | -1.24 | 1.22 | 0 | 0 | 0 | not significant |
| 3447 | ACEVEDO_FGFR1_TARGETS_IN_PROSTATE_CANCER_MODEL_UP           | -1.24 | 1.21 | 0 | 0 | 0 | not significant |
| 3448 | FLECHNER_PBL_KIDNEY_TRANSPLANT_OK_VS_DONOR_UP               | -1.24 | 1.19 | 0 | 0 | 0 | not significant |
| 3449 | GO_ORGANIC_ANION_TRANSPORT                                  | -1.24 | 1.18 | 0 | 0 | 0 | not significant |
| 3450 | GO_POSITIVE_REGULATION_OF_IMMUNE_EFFECTOR_PROCESS           | -1.24 | 1.15 | 0 | 0 | 0 | not significant |
| 3451 | ESC_J1_UP_EARLY_V1_DN                                       | -1.24 | 1.10 | 0 | 0 | 0 | not significant |
| 3452 | GO_CELLULAR_RESPONSE_TO_TOXIC_SUBSTANCE                     | -1.24 | 1.10 | 0 | 0 | 0 | not significant |
| 3453 | TIEN_INTESTINE_PROBIOTICS_6HR_DN                            | -1.24 | 1.10 | 0 | 0 | 0 | not significant |
| 3454 | GO_LIPID_HOMEOSTASIS                                        | -1.24 | 1.01 | 0 | 0 | 0 | not significant |
| 3455 | LU_AGING_BRAIN_DN                                           | -1.24 | 1.00 | 0 | 0 | 0 | not significant |
| 3456 | KIM_RESPONSE_TO_TSA_AND_DECITABINE_UP                       | -1.24 | 0.94 | 0 | 0 | 0 | not significant |
| 3457 | GO_PERIKARYON                                               | -1.24 | 0.93 | 0 | 0 | 0 | not significant |
| 3458 | ACOSTA_PROLIFERATION_INDEPENDENT_MYC_TARGETS_DN             | -1.24 | 0.92 | 0 | 0 | 0 | not significant |
| 3459 | GO_INTEGRIN_BINDING                                         | -1.24 | 0.89 | 0 | 0 | 0 | not significant |
| 3460 | GO_REGULATION_OF_CALCIIUM_ION_TRANSPORT_INTO_CYTOSOL        | -1.24 | 0.89 | 0 | 0 | 0 | not significant |
| 3461 | GO_MONOSACCHARIDE_BINDING                                   | -1.24 | 0.88 | 0 | 0 | 0 | not significant |
| 3462 | GO_ACID_SECRETION                                           | -1.24 | 0.86 | 0 | 0 | 0 | not significant |
| 3463 | GO_DRUG_CATABOLIC_PROCESS                                   | -1.24 | 0.86 | 0 | 0 | 0 | not significant |
| 3464 | REACTOME_NEGATIVE_REGULATION_OF_MAPK_PATHWAY                | -1.24 | 0.86 | 0 | 0 | 0 | not significant |
| 3465 | BOSCO_TH1_CYTOTOXIC_MODULE                                  | -1.24 | 0.84 | 0 | 0 | 0 | not significant |
| 3466 | GO_INTERLEUKIN_1_PRODUCTION                                 | -1.24 | 0.84 | 0 | 0 | 0 | not significant |
| 3467 | REACTOME_DNA_DOUBLE_STRAND_BREAK_RESPONSE                   | -1.24 | 0.84 | 0 | 0 | 0 | not significant |
| 3468 | GO_CARDIAC_VENTRICLE_DEVELOPMENT                            | -1.24 | 0.82 | 0 | 0 | 0 | not significant |
| 3469 | HUTTMANN_B CLL_POOR_SURVIVAL_DN                             | -1.24 | 0.82 | 0 | 0 | 0 | not significant |
| 3470 | GO_SOMATIC_STEM_CELL_POPULATION_MAINTENANCE                 | -1.24 | 0.81 | 0 | 0 | 0 | not significant |
| 3471 | SESTO_RESPONSE_TO_UV_C2                                     | -1.24 | 0.81 | 0 | 0 | 0 | not significant |
| 3472 | GO_CHROMATIN_SILENCING_AT_RDNA                              | -1.24 | 0.80 | 0 | 0 | 0 | not significant |
| 3473 | GO_POSITIVE_REGULATION_OF_GENE_EXPRESSION_EPIGENETIC        | -1.24 | 0.80 | 0 | 0 | 0 | not significant |
| 3474 | CHR7P15                                                     | -1.24 | 0.79 | 0 | 0 | 0 | not significant |
| 3475 | GO_RELEASE_OF_CYTOCHROME_C_FROM_MITOCHONDRIA                | -1.24 | 0.79 | 0 | 0 | 0 | not significant |
| 3476 | REACTOME_BASE_EXCISION_REPAIR_AP_SITE_FORMATION             | -1.24 | 0.79 | 0 | 0 | 0 | not significant |

|      |                                                           |       |      |   |   |   |                 |
|------|-----------------------------------------------------------|-------|------|---|---|---|-----------------|
| 3477 | REACTOME_THROMBIN_SIGNALLING_THROUGH_PROTEINASE_ACTIVATED | -1.24 | 0.79 | 0 | 0 | 0 | not significant |
| 3478 | LABBE_TGFB1_TARGETS_UP                                    | -1.24 | 0.78 | 0 | 0 | 0 | not significant |
| 3479 | GO_INORGANIC_ION_IMPORT_ACROSS_PLASMA_MEMBRANE            | -1.24 | 0.77 | 0 | 0 | 0 | not significant |
| 3480 | BOYALUT_LIVER_CANCER_SUBCLASS_G123_UP                     | -1.24 | 0.76 | 0 | 0 | 0 | not significant |
| 3481 | GO_CELLULAR_RESPONSE_TO_ALKALOID                          | -1.24 | 0.76 | 0 | 0 | 0 | not significant |
| 3482 | GO_DITERPENOID_METABOLIC_PROCESS                          | -1.24 | 0.76 | 0 | 0 | 0 | not significant |
| 3483 | GO_VOLTAGE_GATED_POTASSIUM_CHANNEL_ACTIVITY               | -1.24 | 0.75 | 0 | 0 | 0 | not significant |
| 3484 | WEINMANN_ADAPTATION_TO_HYPOXIA_DN                         | -1.24 | 0.74 | 0 | 0 | 0 | not significant |
| 3485 | GO_NEGATIVE_REGULATION_OF_TELOMERE_MAINTENANCE_VIA_TELOM  | -1.24 | 0.73 | 0 | 0 | 0 | not significant |
| 3486 | TOMIDA_METASTASIS_UP                                      | -1.24 | 0.73 | 0 | 0 | 0 | not significant |
| 3487 | GO_COPPER_ION_HOMEOSTASIS                                 | -1.24 | 0.72 | 0 | 0 | 0 | not significant |
| 3488 | GO_COPII_VESICLE_COAT                                     | -1.24 | 0.71 | 0 | 0 | 0 | not significant |
| 3489 | GO_POSITIVE_REGULATION_OF_MRNA_PROCESSING                 | -1.24 | 0.71 | 0 | 0 | 0 | not significant |
| 3490 | GO_VITAMIN_B6_BINDING                                     | -1.24 | 0.71 | 0 | 0 | 0 | not significant |
| 3491 | REACTOME_EPHA_MEDIATED_GROWTH_CONE_COLLAPSE               | -1.24 | 0.71 | 0 | 0 | 0 | not significant |
| 3492 | BIOCARTA_PML_PATHWAY                                      | -1.24 | 0.70 | 0 | 0 | 0 | not significant |
| 3493 | GO_VASCULAR_ENDOTHELIAL_GROWTH_FACTOR_PRODUCTION          | -1.24 | 0.70 | 0 | 0 | 0 | not significant |
| 3494 | VALK_AML_CLUSTER_9                                        | -1.24 | 0.70 | 0 | 0 | 0 | not significant |
| 3495 | GO_CELL_CORTEX_REGION                                     | -1.24 | 0.69 | 0 | 0 | 0 | not significant |
| 3496 | GO_Glutathione_Peroxidase_Activity                        | -1.24 | 0.69 | 0 | 0 | 0 | not significant |
| 3497 | GO_M_BAND                                                 | -1.24 | 0.69 | 0 | 0 | 0 | not significant |
| 3498 | GO_MUSCLE_CELL_CELLULAR_HOMEOSTASIS                       | -1.24 | 0.69 | 0 | 0 | 0 | not significant |
| 3499 | GO_REGULATION_OF_SYSTEMIC_ARTERIAL_BLOOD_PRESSURE_MEDIA   | -1.24 | 0.69 | 0 | 0 | 0 | not significant |
| 3500 | GO_NEGATIVE_REGULATION_OF_CD4_POSITIVE_ALPHA_BETA_T_CELL  | -1.24 | 0.68 | 0 | 0 | 0 | not significant |
| 3501 | GO_REGULATION_OF_NUCLEOBASE_CONTAINING_COMPOUND_TRANSPI   | -1.24 | 0.68 | 0 | 0 | 0 | not significant |
| 3502 | GO_SEMAPHORIN_PLEXIN_SIGNALING_PATHWAY                    | -1.24 | 0.68 | 0 | 0 | 0 | not significant |
| 3503 | GO_CELLULAR_RESPONSE_TO_THYROID_HORMONE_STIMULUS          | -1.24 | 0.67 | 0 | 0 | 0 | not significant |
| 3504 | GO_POSITIVE_REGULATION_OF_ACTIN_FILAMENT_DEPOLYMERIZATION | -1.24 | 0.67 | 0 | 0 | 0 | not significant |
| 3505 | GO_REGULATION_OF_ASPARTIC_TYPE_PEPTIDASE_ACTIVITY         | -1.24 | 0.67 | 0 | 0 | 0 | not significant |
| 3506 | LIANG_SILENCED_BY_METHYLATION_DN                          | -1.24 | 0.67 | 0 | 0 | 0 | not significant |
| 3507 | REACTOME_Glutamate_and_Glutamine_Metabolism               | -1.24 | 0.67 | 0 | 0 | 0 | not significant |
| 3508 | GO TRABECULA FORMATION                                    | -1.24 | 0.66 | 0 | 0 | 0 | not significant |
| 3509 | REACTOME_SYNTHESIS_OF_IP2_IP_AND_INS_IN_THE_CYTOSOL       | -1.24 | 0.66 | 0 | 0 | 0 | not significant |
| 3510 | IWANAGA_E2F1_TARGETS_NOT_INDUCED_BY_SERUM                 | -1.24 | 0.65 | 0 | 0 | 0 | not significant |
| 3511 | REACTOME_ADP_SIGNALLING_THROUGH_P2Y_PURINOCEPTOR_1        | -1.24 | 0.65 | 0 | 0 | 0 | not significant |
| 3512 | REACTOME_ALPHA_LINOLENIC_OMEGA3_AND_LINOLEIC_OMEGA6_ACID  | -1.24 | 0.65 | 0 | 0 | 0 | not significant |
| 3513 | GO_CELLULAR_RESPONSE_TO_MANGANESE_ION                     | -1.24 | 0.64 | 0 | 0 | 0 | not significant |
| 3514 | GO_G_PROTEIN_COUPLED_PURINERGIC_RECEPTOR_SIGNALING_PATHW  | -1.24 | 0.64 | 0 | 0 | 0 | not significant |
| 3515 | GO_POSITIVE_REGULATION_OF_METANEPHROS_DEVELOPMENT         | -1.24 | 0.64 | 0 | 0 | 0 | not significant |
| 3516 | GO_TRNA_THIO_MODIFICATION                                 | -1.24 | 0.64 | 0 | 0 | 0 | not significant |
| 3517 | BIOCARTA_DNAFRAGMENT_PATHWAY                              | -1.24 | 0.63 | 0 | 0 | 0 | not significant |
| 3518 | GO_CYTIDYLTRANSFERASE_ACTIVITY                            | -1.24 | 0.63 | 0 | 0 | 0 | not significant |
| 3519 | GO_REGULATION_OF_MACROPHAGE_APOPTOTIC_PROCESS             | -1.24 | 0.63 | 0 | 0 | 0 | not significant |
| 3520 | GO_IMPORTIN_ALPHA_FAMILY_PROTEIN_BINDING                  | -1.24 | 0.62 | 0 | 0 | 0 | not significant |
| 3521 | REACTOME_APOBEC3G_MEDIATED_RESISTANCE_TO_HIV_1_INFECTION  | -1.24 | 0.62 | 0 | 0 | 0 | not significant |
| 3522 | GO_AMP_METABOLIC_PROCESS                                  | -1.24 | 0.61 | 0 | 0 | 0 | not significant |
| 3523 | GO_SULFUR_AMINO_ACID_CATABOLIC_PROCESS                    | -1.24 | 0.61 | 0 | 0 | 0 | not significant |
| 3524 | GO_ANATOMICAL_STRUCTURE_REGRESSION                        | -1.24 | 0.59 | 0 | 0 | 0 | not significant |
| 3525 | GO_CELLULAR_HOMEOSTASIS                                   | -1.23 | 4.00 | 0 | 0 | 0 | not significant |
| 3526 | GO_ORGANONITROGEN_COMPOUND_BIOSYNTHETIC_PROCESS           | -1.23 | 4.00 | 0 | 0 | 0 | not significant |
| 3527 | WAKABAYASHI_ADIPOGENESIS_PPARG_RXRA_BOUND_8D              | -1.23 | 2.15 | 0 | 0 | 0 | not significant |
| 3528 | GO_CELL_SUBSTRATE_JUNCTION                                | -1.23 | 2.06 | 0 | 0 | 0 | not significant |
| 3529 | GRYDER_PAX3FOXO1_TOP_ENHANCERS                            | -1.23 | 1.84 | 0 | 0 | 0 | not significant |
| 3530 | MARTENS_BOUND_BY_PML_RARA_FUSION                          | -1.23 | 1.66 | 0 | 0 | 0 | not significant |
| 3531 | LOCKWOOD_AMPLIFIED_IN_LUNG_CANCER                         | -1.23 | 1.51 | 0 | 0 | 0 | not significant |
| 3532 | GO_DEFENSE_RESPONSE_TO_VIRUS                              | -1.23 | 1.47 | 0 | 0 | 0 | not significant |
| 3533 | GO_WOUND_HEALING                                          | -1.23 | 1.41 | 0 | 0 | 0 | not significant |
| 3534 | REACTOME_ANTIGEN_PROCESSING_UBIQUITINATION_PROTEASOME_DE  | -1.23 | 1.39 | 0 | 0 | 0 | not significant |
| 3535 | GO_NEURON_DEATH                                           | -1.23 | 1.34 | 0 | 0 | 0 | not significant |
| 3536 | GO_LEUKOCYTE_MIGRATION                                    | -1.23 | 1.32 | 0 | 0 | 0 | not significant |
| 3537 | BROWNE_HCMV_INFECTION_14HR_DN                             | -1.23 | 1.25 | 0 | 0 | 0 | not significant |
| 3538 | REACTOME_RRNA_PROCESSING                                  | -1.23 | 1.21 | 0 | 0 | 0 | not significant |
| 3539 | SWEET_LUNG_CANCER_KRAS_DN                                 | -1.23 | 1.17 | 0 | 0 | 0 | not significant |
| 3540 | PDGF_UP.V1_UP                                             | -1.23 | 1.06 | 0 | 0 | 0 | not significant |
| 3541 | REACTOME_EPIGENETIC_REGULATION_OF_GENE_EXPRESSION         | -1.23 | 1.03 | 0 | 0 | 0 | not significant |
| 3542 | MIKKELSEN_MCV6_LCP_WITH_H3K4ME3                           | -1.23 | 1.02 | 0 | 0 | 0 | not significant |
| 3543 | GO_ALPHA_AMINO_ACID_METABOLIC_PROCESS                     | -1.23 | 1.01 | 0 | 0 | 0 | not significant |
| 3544 | GO_REGULATION_OF_CELL_CYCLE_G1_S_PHASE_TRANSITION         | -1.23 | 1.00 | 0 | 0 | 0 | not significant |
| 3545 | WARTERS_RESPONSE_TO_IR_SKIN                               | -1.23 | 1.00 | 0 | 0 | 0 | not significant |
| 3546 | BRUECKNER_TARGETS_OF_MIRLET7A3_UP                         | -1.23 | 0.96 | 0 | 0 | 0 | not significant |
| 3547 | PLASARI_TGFB1_TARGETS_10HR_UP                             | -1.23 | 0.96 | 0 | 0 | 0 | not significant |
| 3548 | GO_REGULATION_OF_CALCIIUM_MEDIATED_SIGNALING              | -1.23 | 0.94 | 0 | 0 | 0 | not significant |
| 3549 | REACTOME_GPCR_LIGAND_BINDING                              | -1.23 | 0.94 | 0 | 0 | 0 | not significant |
| 3550 | SRC_UP.V1_DN                                              | -1.23 | 0.93 | 0 | 0 | 0 | not significant |
| 3551 | GO_DNA_DEPENDENT_ATPASE_ACTIVITY                          | -1.23 | 0.92 | 0 | 0 | 0 | not significant |
| 3552 | REACTOME_GLOBAL_GENOME_NUCLEOTIDE_EXCISION_REPAIR_GG_NEI  | -1.23 | 0.89 | 0 | 0 | 0 | not significant |
| 3553 | KEGG_TIGHT_JUNCTION                                       | -1.23 | 0.88 | 0 | 0 | 0 | not significant |
| 3554 | BREDEMEYER_RAG_SIGNALING_NOT_VIA_ATM_UP                   | -1.23 | 0.87 | 0 | 0 | 0 | not significant |
| 3555 | GO_TRANSPORT_OF_VIRUS                                     | -1.23 | 0.87 | 0 | 0 | 0 | not significant |
| 3556 | REACTOME_CIRCADIAN_CLOCK                                  | -1.23 | 0.87 | 0 | 0 | 0 | not significant |
| 3557 | GO_CAJAL_BODY                                             | -1.23 | 0.86 | 0 | 0 | 0 | not significant |
| 3558 | GO_DRUG_TRANSMEMBRANE_TRANSPORT                           | -1.23 | 0.86 | 0 | 0 | 0 | not significant |
| 3559 | GO_FLAVIN_ADENINE_DINUCLEOTIDE_BINDING                    | -1.23 | 0.86 | 0 | 0 | 0 | not significant |
| 3560 | GO_PROTEIN_TRANSMEMBRANE_TRANSPORT                        | -1.23 | 0.86 | 0 | 0 | 0 | not significant |
| 3561 | GO_GDP_BINDING                                            | -1.23 | 0.85 | 0 | 0 | 0 | not significant |
| 3562 | GO_REGULATION_OF_MITOCHONDRIAL_MEMBRANE_POTENTIAL         | -1.23 | 0.84 | 0 | 0 | 0 | not significant |
| 3563 | LIN_NPAS4_TARGETS_DN                                      | -1.23 | 0.84 | 0 | 0 | 0 | not significant |
| 3564 | GO_INOSITOL_PHOSPHATE_MEDIATED_SIGNALING                  | -1.23 | 0.83 | 0 | 0 | 0 | not significant |
| 3565 | GO_REGULATION_OF_OXIDATIVE_STRESS_INDUCED_CELL_DEATH      | -1.23 | 0.83 | 0 | 0 | 0 | not significant |
| 3566 | REACTOME_REGULATION_OF_ACTIN_DYNAMICS_FOR_PHAGOCYTOIC_CU  | -1.23 | 0.82 | 0 | 0 | 0 | not significant |
| 3567 | BRUECKNER_TARGETS_OF_MIRLET7A3_DN                         | -1.23 | 0.81 | 0 | 0 | 0 | not significant |
| 3568 | GO_CELL_CELL_RECOGNITION                                  | -1.23 | 0.80 | 0 | 0 | 0 | not significant |
| 3569 | GO_MIDBRAIN_DEVELOPMENT                                   | -1.23 | 0.79 | 0 | 0 | 0 | not significant |
| 3570 | GO_STRIATED_MUSCLE_ADAPTATION                             | -1.23 | 0.78 | 0 | 0 | 0 | not significant |
| 3571 | NADLER_OBESITY_DN                                         | -1.23 | 0.78 | 0 | 0 | 0 | not significant |
| 3572 | GO_REGULATION_OF_SODIUM_ION_TRANSMEMBRANE_TRANSPORTER_    | -1.23 | 0.77 | 0 | 0 | 0 | not significant |
| 3573 | GOTZMANN_EPITHELIAL_TO_MESENCHYMAL_TRANSITION_UP          | -1.23 | 0.77 | 0 | 0 | 0 | not significant |
| 3574 | GO_REGULATION_OF_MUSCLE_HYPERTROPHY                       | -1.23 | 0.76 | 0 | 0 | 0 | not significant |
| 3575 | GO_HOMEOSTASIS_OF_NUMBER_OF_CELLS_WITHIN_A_TISSUE         | -1.23 | 0.75 | 0 | 0 | 0 | not significant |
| 3576 | GO_RETINA_HOMEOSTASIS                                     | -1.23 | 0.75 | 0 | 0 | 0 | not significant |
| 3577 | ROSS_AML_WITH_CBF3_MYH11_FUSION                           | -1.23 | 0.75 | 0 | 0 | 0 | not significant |
| 3578 | GO_METANEPHROS_DEVELOPMENT                                | -1.23 | 0.74 | 0 | 0 | 0 | not significant |
| 3579 | GO_LIVER_REGENERATION                                     | -1.23 | 0.72 | 0 | 0 | 0 | not significant |
| 3580 | HOFMANN_MYELODYSPLASTIC_SYNDROM_LOW_RISK_UP               | -1.23 | 0.72 | 0 | 0 | 0 | not significant |
| 3581 | GO_POSITIVE_REGULATION_OF_CYTOKINESIS                     | -1.23 | 0.71 | 0 | 0 | 0 | not significant |
| 3582 | TIAN_TNF_SIGNALING_NOT_VIA_NFKB                           | -1.23 | 0.71 | 0 | 0 | 0 | not significant |
| 3583 | YORDY_RECIPROCAL_REGULATION_BY_ETS1_AND_SP100_UP          | -1.23 | 0.70 | 0 | 0 | 0 | not significant |
| 3584 | BIOCARTA_CSK_PATHWAY                                      | -1.23 | 0.69 | 0 | 0 | 0 | not significant |
| 3585 | GO_AUTONOMIC_NERVOUS_SYSTEM_DEVELOPMENT                   | -1.23 | 0.69 | 0 | 0 | 0 | not significant |

|      |                                                             |       |      |   |   |   |                 |
|------|-------------------------------------------------------------|-------|------|---|---|---|-----------------|
| 3586 | GO_DNA_DEALKYLATION                                         | -1.23 | 0.69 | 0 | 0 | 0 | not significant |
| 3587 | GO_REGULATION_OF_GLIAL_CELL_PROLIFERATION                   | -1.23 | 0.69 | 0 | 0 | 0 | not significant |
| 3588 | GO_EPITHELIAL_CELL_DIFFERENTIATION_INVOLVED_IN_KIDNEY_DEVEL | -1.23 | 0.67 | 0 | 0 | 0 | not significant |
| 3589 | REACTOME_NUCLEAR_ENVELOPE_REASSEMBLY                        | -1.23 | 0.67 | 0 | 0 | 0 | not significant |
| 3590 | REACTOME_TRAF6_MEDIATED_IRF7_ACTIVATION_IN_TLR7_8_OR_9_SIG  | -1.23 | 0.67 | 0 | 0 | 0 | not significant |
| 3591 | GO_MEIOTIC_SPINDLE_ORGANIZATION                             | -1.23 | 0.66 | 0 | 0 | 0 | not significant |
| 3592 | GO_PLATELET_MORPHOGENESIS                                   | -1.23 | 0.66 | 0 | 0 | 0 | not significant |
| 3593 | RAMPON_ENRICHED_LEARNING_ENVIRONMENT_EARLY_DN               | -1.23 | 0.66 | 0 | 0 | 0 | not significant |
| 3594 | BIOCARTA_PTC1_PATHWAY                                       | -1.23 | 0.65 | 0 | 0 | 0 | not significant |
| 3595 | GO_C_ACETYLTRANSFERASE_ACTIVITY                             | -1.23 | 0.65 | 0 | 0 | 0 | not significant |
| 3596 | REACTOME_REDUCTION_OF_CYTOSOLIC_CAPLUSPLUS_LEVELS           | -1.23 | 0.65 | 0 | 0 | 0 | not significant |
| 3597 | GO_AGGREPHAGY                                               | -1.23 | 0.64 | 0 | 0 | 0 | not significant |
| 3598 | GO_CORONARY_VASCULATURE_MORPHOGENESIS                       | -1.23 | 0.64 | 0 | 0 | 0 | not significant |
| 3599 | GO_MEMBRANE_DEPOLARIZATION_DURING_CARDIAC_MUSCLE_CELL_AC    | -1.23 | 0.64 | 0 | 0 | 0 | not significant |
| 3600 | GO_OXIDOREDUCTASE_ACTIVITY_ACTING_ON_PAISED_DONORS_WITH_I   | -1.23 | 0.64 | 0 | 0 | 0 | not significant |
| 3601 | GO_PROTEOGLYCAN_BINDING                                     | -1.23 | 0.64 | 0 | 0 | 0 | not significant |
| 3602 | GO_REGULATION_OF_MEMBRANE_REPOLARIZATION                    | -1.23 | 0.64 | 0 | 0 | 0 | not significant |
| 3603 | GO_SNORNA_3_END_PROCESSING                                  | -1.23 | 0.64 | 0 | 0 | 0 | not significant |
| 3604 | HOFMANN_MYELODYSPLASTIC_SYNDROM_HIGH_RISK_DN                | -1.23 | 0.64 | 0 | 0 | 0 | not significant |
| 3605 | REACTOME_VLDLR_INTERNALISATION_AND_DEGRADATION              | -1.23 | 0.64 | 0 | 0 | 0 | not significant |
| 3606 | GO_DOLICHYL_DIPHOSPHATE_BIOSYNTHETIC_PROCESS                | -1.23 | 0.63 | 0 | 0 | 0 | not significant |
| 3607 | GO_POTASSIUM_CHANNEL_INHIBITOR_ACTIVITY                     | -1.23 | 0.63 | 0 | 0 | 0 | not significant |
| 3608 | REACTOME_GRB2-SOS_PROVIDES_LINKAGE_TO_MAPK_SIGNALING_FOR    | -1.23 | 0.63 | 0 | 0 | 0 | not significant |
| 3609 | WANG_ESOPHAGUS_CANCER_PROGRESSION_UP                        | -1.23 | 0.63 | 0 | 0 | 0 | not significant |
| 3610 | GO_NEGATIVE_REGULATION_OF_HELICASE_ACTIVITY                 | -1.23 | 0.62 | 0 | 0 | 0 | not significant |
| 3611 | GO_REGULATION_OF_DNA_DUPLEX_UNWINDING                       | -1.23 | 0.62 | 0 | 0 | 0 | not significant |
| 3612 | FRIDMAN_SENESCENCE_DN                                       | -1.23 | 0.61 | 0 | 0 | 0 | not significant |
| 3613 | GO_CAMERA_TYPE_EYE_PHOTORECEPTOR_CELL_DIFFERENTIATION       | -1.23 | 0.61 | 0 | 0 | 0 | not significant |
| 3614 | GO_MITOCHONDRIAL_RESPIRATORY_CHAIN_COMPLEX_III_ASSEMBLY     | -1.23 | 0.61 | 0 | 0 | 0 | not significant |
| 3615 | GO_POSITIVE_REGULATION_OF_IMMUNOGLOBULIN_SECRETION          | -1.23 | 0.60 | 0 | 0 | 0 | not significant |
| 3616 | GO_SPERMATOPROTEASOME_COMPLEX                               | -1.23 | 0.60 | 0 | 0 | 0 | not significant |
| 3617 | REACTOME_SHC1_EVENTS_IN_ERBB4_SIGNALING                     | -1.23 | 0.60 | 0 | 0 | 0 | not significant |
| 3618 | GO_IDENTICAL_PROTEIN_BINDING                                | -1.22 | 4.00 | 0 | 0 | 0 | not significant |
| 3619 | GO_LEUKOCYTE_MEDIATED_IMMUNITY                              | -1.22 | 4.00 | 0 | 0 | 0 | not significant |
| 3620 | GRÄESSMANN_RESPONSE_TO_MC_AND_DOXORUBICIN_DN                | -1.22 | 4.00 | 0 | 0 | 0 | not significant |
| 3621 | SCHLOSSER_SERUM_RESPONSE_DN                                 | -1.22 | 1.82 | 0 | 0 | 0 | not significant |
| 3622 | GO_HEART_DEVELOPMENT                                        | -1.22 | 1.63 | 0 | 0 | 0 | not significant |
| 3623 | GO_IMMUNE_RESPONSE_REGULATING_SIGNALING_PATHWAY             | -1.22 | 1.63 | 0 | 0 | 0 | not significant |
| 3624 | DELACROIX_RARG_BOUND_MEF                                    | -1.22 | 1.31 | 0 | 0 | 0 | not significant |
| 3625 | GO_REGULATION_OF_CELL_ADHESION                              | -1.22 | 1.31 | 0 | 0 | 0 | not significant |
| 3626 | REACTOME_TRANSCRIPTIONAL_REGULATION_BY_RUNX1                | -1.22 | 1.31 | 0 | 0 | 0 | not significant |
| 3627 | HOLLMANN_APOPTOSIS_VIA_CD40_UP                              | -1.22 | 1.29 | 0 | 0 | 0 | not significant |
| 3628 | GO_EPITHELIAL_TUBE_MORPHOGENESIS                            | -1.22 | 1.23 | 0 | 0 | 0 | not significant |
| 3629 | MEISSNER_NPC_HCP_WITH_H3K4ME2                               | -1.22 | 1.23 | 0 | 0 | 0 | not significant |
| 3630 | REACTOME_SIGNALING_BY_GPCR                                  | -1.22 | 1.23 | 0 | 0 | 0 | not significant |
| 3631 | GO_DNA_CONFORMATION_CHANGE                                  | -1.22 | 1.19 | 0 | 0 | 0 | not significant |
| 3632 | PURBEY_TARGETS_OF_CTBP1_NOT_SATB1_UP                        | -1.22 | 1.15 | 0 | 0 | 0 | not significant |
| 3633 | GO_PROTEIN_MATURATION                                       | -1.22 | 1.13 | 0 | 0 | 0 | not significant |
| 3634 | REACTOME_NEURONAL_SYSTEM                                    | -1.22 | 1.12 | 0 | 0 | 0 | not significant |
| 3635 | GO_REGULATION_OF_RNA_METABOLIC_PROCESS                      | -1.22 | 1.09 | 0 | 0 | 0 | not significant |
| 3636 | GO_CONNECTIVE_TISSUE_DEVELOPMENT                            | -1.22 | 1.08 | 0 | 0 | 0 | not significant |
| 3637 | GO_REGULATION_OF_CYSTEINE_TYPE_ENDOPEPTIDASE_ACTIVITY       | -1.22 | 1.08 | 0 | 0 | 0 | not significant |
| 3638 | GO_REGULATION_OF_PROTEASOMAL_PROTEIN_CATABOLIC_PROCESS      | -1.22 | 1.06 | 0 | 0 | 0 | not significant |
| 3639 | GRUETZMANN_PANCREATIC_CANCER_DN                             | -1.22 | 1.04 | 0 | 0 | 0 | not significant |
| 3640 | GARGALOVIC_RESPONSE_TO_OXIDIZED_PHOSPHOLIPIDS_BLUE_UP       | -1.22 | 1.00 | 0 | 0 | 0 | not significant |
| 3641 | GO_VACUOLAR_LUMEN                                           | -1.22 | 1.00 | 0 | 0 | 0 | not significant |
| 3642 | ACEVEDO_LIVER_CANCER_WITH_H3K27ME3_DN                       | -1.22 | 0.99 | 0 | 0 | 0 | not significant |
| 3643 | GO_MICROTUBULE_ASSOCIATED_COMPLEX                           | -1.22 | 0.98 | 0 | 0 | 0 | not significant |
| 3644 | KIM_WT1_TARGETS_8HR_UP                                      | -1.22 | 0.97 | 0 | 0 | 0 | not significant |
| 3645 | GO_MYELOID_CELL_HOMEOSTASIS                                 | -1.22 | 0.90 | 0 | 0 | 0 | not significant |
| 3646 | GO_ORGANIC_ACID_TRANSMEMBRANE_TRANSPORTER_ACTIVITY          | -1.22 | 0.90 | 0 | 0 | 0 | not significant |
| 3647 | GO_PURINE_NTP_DEPENDENT_HELICASE_ACTIVITY                   | -1.22 | 0.90 | 0 | 0 | 0 | not significant |
| 3648 | GO_PROTEIN_SERINE_THREONINE_PHOSPHATASE_ACTIVITY            | -1.22 | 0.89 | 0 | 0 | 0 | not significant |
| 3649 | GO_REGULATION_OF_RESPONSE_TO_WOUNDING                       | -1.22 | 0.89 | 0 | 0 | 0 | not significant |
| 3650 | CHR10Q22                                                    | -1.22 | 0.88 | 0 | 0 | 0 | not significant |
| 3651 | GO_GOLGI_VESICLE_BUDDING                                    | -1.22 | 0.86 | 0 | 0 | 0 | not significant |
| 3652 | CHANG_IMMORTALIZED_BY_HPV31_UP                              | -1.22 | 0.85 | 0 | 0 | 0 | not significant |
| 3653 | GO_PLATELET_ALPHA_GRANULE                                   | -1.22 | 0.84 | 0 | 0 | 0 | not significant |
| 3654 | HUMMERICH_SKIN_CANCER_PROGRESSION_UP                        | -1.22 | 0.84 | 0 | 0 | 0 | not significant |
| 3655 | SCIBETTA_KDM5B_TARGETS_DN                                   | -1.22 | 0.84 | 0 | 0 | 0 | not significant |
| 3656 | REACTOME_ACTIVATED_PKN1_STIMULATES_TRANSCRIPTION_OF_AR_AI   | -1.22 | 0.83 | 0 | 0 | 0 | not significant |
| 3657 | NUTT_GBM_VS_AO_GLIOMA_UP                                    | -1.22 | 0.81 | 0 | 0 | 0 | not significant |
| 3658 | GO_IMPORT_ACROSS_PLASMA_MEMBRANE                            | -1.22 | 0.80 | 0 | 0 | 0 | not significant |
| 3659 | MA_MYELOID_DIFFERENTIATION_UP                               | -1.22 | 0.80 | 0 | 0 | 0 | not significant |
| 3660 | MOLENAAR_TARGETS_OF_CCND1_AND_CDK4_DN                       | -1.22 | 0.79 | 0 | 0 | 0 | not significant |
| 3661 | REACTOME_IRE1ALPHA_ACTIVATES_CHAPERONES                     | -1.22 | 0.79 | 0 | 0 | 0 | not significant |
| 3662 | GO_POSITIVE_REGULATION_OF_FIBROBLAST_PROLIFERATION          | -1.22 | 0.78 | 0 | 0 | 0 | not significant |
| 3663 | LINDVALL_IMMORTALIZED_BY_TERT_DN                            | -1.22 | 0.78 | 0 | 0 | 0 | not significant |
| 3664 | PID_HIV_NEF_PATHWAY                                         | -1.22 | 0.77 | 0 | 0 | 0 | not significant |
| 3665 | GO_REGULATION_OF_T_CELL_APOPTOTIC_PROCESS                   | -1.22 | 0.76 | 0 | 0 | 0 | not significant |
| 3666 | ZHAN_MULTIPLE_MYELOMA_MF_UP                                 | -1.22 | 0.75 | 0 | 0 | 0 | not significant |
| 3667 | GO_NEUROTROPHIN_SIGNALING_PATHWAY                           | -1.22 | 0.74 | 0 | 0 | 0 | not significant |
| 3668 | GAVIN_FOXP3_TARGETS_CLUSTER_P2                              | -1.22 | 0.71 | 0 | 0 | 0 | not significant |
| 3669 | GO_DNA_DEMETHYLATION                                        | -1.22 | 0.71 | 0 | 0 | 0 | not significant |
| 3670 | GO_DNA_HELICASE_COMPLEX                                     | -1.22 | 0.71 | 0 | 0 | 0 | not significant |
| 3671 | GO_NUCLEOSIDE_MONOPHOSPHATE_KINASE_ACTIVITY                 | -1.22 | 0.71 | 0 | 0 | 0 | not significant |
| 3672 | GO_POSITIVE_REGULATION_OF_MULTICELLULAR_ORGANISM_GROWTH     | -1.22 | 0.71 | 0 | 0 | 0 | not significant |
| 3673 | WILCOX_RESPONSE_TO_PROGESTERONE_DN                          | -1.22 | 0.70 | 0 | 0 | 0 | not significant |
| 3674 | GO_REGULATION_OF_MEMBRANE_DEPOLARIZATION                    | -1.22 | 0.69 | 0 | 0 | 0 | not significant |
| 3675 | PID_UPA_UPAR_PATHWAY                                        | -1.22 | 0.69 | 0 | 0 | 0 | not significant |
| 3676 | GO_DENDRITE_CYTOPLASM                                       | -1.22 | 0.67 | 0 | 0 | 0 | not significant |
| 3677 | GO_FOAM_CELL_DIFFERENTIATION                                | -1.22 | 0.67 | 0 | 0 | 0 | not significant |
| 3678 | GO_POSITIVE_REGULATION_OF_ALCOHOL_BIOSYNTHETIC_PROCESS      | -1.22 | 0.67 | 0 | 0 | 0 | not significant |
| 3679 | GO_POSITIVE_REGULATION_OF_HEART_GROWTH                      | -1.22 | 0.67 | 0 | 0 | 0 | not significant |
| 3680 | GO_PROTEIN_HOMOTRIMERIZATION                                | -1.22 | 0.67 | 0 | 0 | 0 | not significant |
| 3681 | BIOCARTA_TCRA_PATHWAY                                       | -1.22 | 0.66 | 0 | 0 | 0 | not significant |
| 3682 | GO_GLUTATHIONE_DERIVATIVE_BIOSYNTHETIC_PROCESS              | -1.22 | 0.66 | 0 | 0 | 0 | not significant |
| 3683 | GO_ANKYRIN_BINDING                                          | -1.22 | 0.64 | 0 | 0 | 0 | not significant |
| 3684 | GO GLUTAMINE_FAMILY_AMINO_ACID_CATABOLIC_PROCESS            | -1.22 | 0.64 | 0 | 0 | 0 | not significant |
| 3685 | GO_ESTABLISHMENT_OR_MAINTENANCE_OF_ACTIN_CYTOSKELETON_PI    | -1.22 | 0.63 | 0 | 0 | 0 | not significant |
| 3686 | GO_ESTROUS_CYCLE                                            | -1.22 | 0.63 | 0 | 0 | 0 | not significant |
| 3687 | GO_MHC_CLASS_I_PROTEIN_COMPLEX                              | -1.22 | 0.63 | 0 | 0 | 0 | not significant |
| 3688 | GO_TRNA_AMINOACYLATION_FOR_MITOCHONDRIAL_PROTEIN_TRANSLA    | -1.22 | 0.63 | 0 | 0 | 0 | not significant |
| 3689 | OHASHI_AURKB_TARGETS                                        | -1.22 | 0.62 | 0 | 0 | 0 | not significant |
| 3690 | VALK_AML_CLUSTER_5                                          | -1.22 | 0.62 | 0 | 0 | 0 | not significant |
| 3691 | GO_ALANINE_TRANSMEMBRANE_TRANSPORTER_ACTIVITY               | -1.22 | 0.61 | 0 | 0 | 0 | not significant |
| 3692 | GO_CYTOPLASMIC_TRANSLATIONAL_ELONGATION                     | -1.22 | 0.61 | 0 | 0 | 0 | not significant |
| 3693 | GO_GALACTOSE_CATABOLIC_PROCESS_VIA_UDP_GALACTOSE            | -1.22 | 0.61 | 0 | 0 | 0 | not significant |
| 3694 | GO_SPERM_MIDPIECE                                           | -1.22 | 0.61 | 0 | 0 | 0 | not significant |

|      |                                                            |       |      |   |   |   |                 |
|------|------------------------------------------------------------|-------|------|---|---|---|-----------------|
| 3695 | GO NEGATIVE REGULATION OF TRANSLATION IN RESPONSE TO STR   | -1.22 | 0.60 | 0 | 0 | 0 | not significant |
| 3696 | GO PRESYNAPTIC ACTIVE_ZONE_CYTOPLASMIC_COMPONENT           | -1.22 | 0.60 | 0 | 0 | 0 | not significant |
| 3697 | MYLLYKANGAS_AMPLIFICATION_HOT_SPOT_27                      | -1.22 | 0.60 | 0 | 0 | 0 | not significant |
| 3698 | REACTOME_PP2A_MEDIATED_DEPHOSPHORYLATION_OF_KEY_METABO     | -1.22 | 0.60 | 0 | 0 | 0 | not significant |
| 3699 | GO_L_ALANINE_TRANSPORT                                     | -1.22 | 0.58 | 0 | 0 | 0 | not significant |
| 3700 | GO_POSITIVE_REGULATION_OF_URINE_VOLUME                     | -1.22 | 0.57 | 0 | 0 | 0 | not significant |
| 3701 | MISHRA_CARCINOMA_ASSOCIATED_FIBROBLAST_UP                  | -1.22 | 0.57 | 0 | 0 | 0 | not significant |
| 3702 | GO_PHOSPHATIDYLCHOLINE_CATABOLIC_PROCESS                   | -1.22 | 0.56 | 0 | 0 | 0 | not significant |
| 3703 | GO_ZONA_PELLUCIDA_RECEPTOR_COMPLEX                         | -1.22 | 0.55 | 0 | 0 | 0 | not significant |
| 3704 | GO_NEGATIVE_REGULATION_OF_CELL_DEATH                       | -1.21 | 2.14 | 0 | 0 | 0 | not significant |
| 3705 | GO_CELL_ACTIVATION_INVOLVED_IN_IMMUNE_RESPONSE             | -1.21 | 1.95 | 0 | 0 | 0 | not significant |
| 3706 | GO_PROTEASOMAL_PROTEIN_CATABOLIC_PROCESS                   | -1.21 | 1.94 | 0 | 0 | 0 | not significant |
| 3707 | GO_CELLULAR_RESPONSE_TO_ENDOGENOUS_STIMULUS                | -1.21 | 1.78 | 0 | 0 | 0 | not significant |
| 3708 | GO_PROTEIN_COMPLEX_OLIGOMERIZATION                         | -1.21 | 1.70 | 0 | 0 | 0 | not significant |
| 3709 | GO_ENZYME_ACTIVATOR_ACTIVITY                               | -1.21 | 1.56 | 0 | 0 | 0 | not significant |
| 3710 | GO_CYTOPLASMIC_REGION                                      | -1.21 | 1.54 | 0 | 0 | 0 | not significant |
| 3711 | GO_LIPID_BIOSYNTHETIC_PROCESS                              | -1.21 | 1.51 | 0 | 0 | 0 | not significant |
| 3712 | MARTINEZ_RESPONSE_TO TRABECTEDIN_DN                        | -1.21 | 1.36 | 0 | 0 | 0 | not significant |
| 3713 | FORTSCHEGGER_PHF8_TARGETS_UP                               | -1.21 | 1.20 | 0 | 0 | 0 | not significant |
| 3714 | WELCSH_BRCA1_TARGETS_UP                                    | -1.21 | 1.12 | 0 | 0 | 0 | not significant |
| 3715 | GO_REGULATION_OF_CELL_SHAPE                                | -1.21 | 1.03 | 0 | 0 | 0 | not significant |
| 3716 | GO_NEGATIVE_REGULATION_OF_MULTI_ORGANISM_PROCESS           | -1.21 | 1.01 | 0 | 0 | 0 | not significant |
| 3717 | GO_MICROBODY                                               | -1.21 | 0.98 | 0 | 0 | 0 | not significant |
| 3718 | GO_ERK1_AND_ERK2_CASCADE                                   | -1.21 | 0.97 | 0 | 0 | 0 | not significant |
| 3719 | BOSCO_ALLERGEN_INDUCED_TH2_ASSOCIATED_MODULE               | -1.21 | 0.96 | 0 | 0 | 0 | not significant |
| 3720 | GO_SULFUR_COMPOUND_BIOSYNTHETIC_PROCESS                    | -1.21 | 0.96 | 0 | 0 | 0 | not significant |
| 3721 | GO_NUCLEAR_CHROMOSOME_TELOMERIC_REGION                     | -1.21 | 0.92 | 0 | 0 | 0 | not significant |
| 3722 | GO_SERINE_HYDROLASE_ACTIVITY                               | -1.21 | 0.88 | 0 | 0 | 0 | not significant |
| 3723 | GO_ORGAN_GROWTH                                            | -1.21 | 0.85 | 0 | 0 | 0 | not significant |
| 3724 | GO_ACTIN_FILAMENT                                          | -1.21 | 0.84 | 0 | 0 | 0 | not significant |
| 3725 | GO_REGULATION_OF_VIRAL_GENOME_REPLICATION                  | -1.21 | 0.84 | 0 | 0 | 0 | not significant |
| 3726 | GEORGES_CELL_CYCLE_MIR192_TARGETS                          | -1.21 | 0.81 | 0 | 0 | 0 | not significant |
| 3727 | GO_INTRINSIC_APOPTOTIC_SIGNALING_PATHWAY_IN_RESPONSE_TO_EN | -1.21 | 0.81 | 0 | 0 | 0 | not significant |
| 3728 | GO_AXON_CYTOPLASM                                          | -1.21 | 0.80 | 0 | 0 | 0 | not significant |
| 3729 | LEE_EARLY_T_LYMPHOCYTE_DN                                  | -1.21 | 0.80 | 0 | 0 | 0 | not significant |
| 3730 | CHR11Q14                                                   | -1.21 | 0.79 | 0 | 0 | 0 | not significant |
| 3731 | LEE_CALORIE_RESTRICTION_NEOCORTEX_DN                       | -1.21 | 0.79 | 0 | 0 | 0 | not significant |
| 3732 | PID_NFAT3_PATHWAY                                          | -1.21 | 0.77 | 0 | 0 | 0 | not significant |
| 3733 | GO_RUFFLE_ASSEMBLY                                         | -1.21 | 0.76 | 0 | 0 | 0 | not significant |
| 3734 | JIANG_AGING_CEREBRAL_CORTEX_UP                             | -1.21 | 0.76 | 0 | 0 | 0 | not significant |
| 3735 | SMIRNOV_RESPONSE_TO_IR_2HR_UP                              | -1.21 | 0.75 | 0 | 0 | 0 | not significant |
| 3736 | GO_POSITIVE_REGULATION_OF_ATPASE_ACTIVITY                  | -1.21 | 0.74 | 0 | 0 | 0 | not significant |
| 3737 | GO_COLUMNAR_CUBOIDAL_EPITHELIAL_CELL_DIFFERENTIATION       | -1.21 | 0.73 | 0 | 0 | 0 | not significant |
| 3738 | GO_HYDRO_LYASE_ACTIVITY                                    | -1.21 | 0.73 | 0 | 0 | 0 | not significant |
| 3739 | GO_T_CELL_MIGRATION                                        | -1.21 | 0.72 | 0 | 0 | 0 | not significant |
| 3740 | GO_TIGHT_JUNCTION_ORGANIZATION                             | -1.21 | 0.72 | 0 | 0 | 0 | not significant |
| 3741 | GO_CARDIAC_MUSCLE_TISSUE_MORPHOGENESIS                     | -1.21 | 0.71 | 0 | 0 | 0 | not significant |
| 3742 | PID_ARF6_PATHWAY                                           | -1.21 | 0.71 | 0 | 0 | 0 | not significant |
| 3743 | GO_MEMBRANE_BIOGENESIS                                     | -1.21 | 0.70 | 0 | 0 | 0 | not significant |
| 3744 | WESTON_VEGFA_TARGETS_3HR                                   | -1.21 | 0.69 | 0 | 0 | 0 | not significant |
| 3745 | GO_LIPOPROTEIN_PARTICLE_RECEPTOR_BINDING                   | -1.21 | 0.68 | 0 | 0 | 0 | not significant |
| 3746 | GO_REGULATION_OF_VIRAL_ENTRY_INTO_HOST_CELL                | -1.21 | 0.68 | 0 | 0 | 0 | not significant |
| 3747 | GO_BILE_ACID_BIOSYNTHETIC_PROCESS                          | -1.21 | 0.67 | 0 | 0 | 0 | not significant |
| 3748 | GO_REGULATION_OF_HISTONE_UBIQUITINATION                    | -1.21 | 0.66 | 0 | 0 | 0 | not significant |
| 3749 | VISALA_RESPONSE_TO_HEAT_SHOCK_AND_AGING_DN                 | -1.21 | 0.65 | 0 | 0 | 0 | not significant |
| 3750 | GO_ANNEALING_ACTIVITY                                      | -1.21 | 0.64 | 0 | 0 | 0 | not significant |
| 3751 | GO_CARBOHYDRATE_PHOSPHORYLATION                            | -1.21 | 0.64 | 0 | 0 | 0 | not significant |
| 3752 | ONDER_CDH1_TARGETS_3_UP                                    | -1.21 | 0.64 | 0 | 0 | 0 | not significant |
| 3753 | REACTOME_NEF_MEDIATED_CD8_DOWN_REGULATION                  | -1.21 | 0.64 | 0 | 0 | 0 | not significant |
| 3754 | REACTOME_RUNX3_REGULATES_NOTCH_SIGNALING                   | -1.21 | 0.64 | 0 | 0 | 0 | not significant |
| 3755 | GO_CYTOPLASMIC_EXOSOME_RNASE_COMPLEX                       | -1.21 | 0.63 | 0 | 0 | 0 | not significant |
| 3756 | HERNANDEZ_ABERRANT_MITOSIS_BY_DOCETACEL_4NM_UP             | -1.21 | 0.63 | 0 | 0 | 0 | not significant |
| 3757 | REACTOME_PROCESSING_OF_SMDT1                               | -1.21 | 0.63 | 0 | 0 | 0 | not significant |
| 3758 | GO ASPARTATE_FAMILY_AMINO_ACID_BIOSYNTHETIC_PROCESS        | -1.21 | 0.62 | 0 | 0 | 0 | not significant |
| 3759 | GO_MHC_PROTEIN_COMPLEX                                     | -1.21 | 0.62 | 0 | 0 | 0 | not significant |
| 3760 | CHEN_LVAD_SUPPORT_OF_FAILING_HEART_DN                      | -1.21 | 0.61 | 0 | 0 | 0 | not significant |
| 3761 | GO_INTRAMOLECULAR_OXIDOREDUCTASE_ACTIVITY_TRANSPOSING_C    | -1.21 | 0.60 | 0 | 0 | 0 | not significant |
| 3762 | GO_NEGATIVE_REGULATION_OF_CELL_GROWTH_INVOLVED_IN_CARDIA   | -1.21 | 0.60 | 0 | 0 | 0 | not significant |
| 3763 | GO_NOTOCHORD_DEVELOPMENT                                   | -1.21 | 0.60 | 0 | 0 | 0 | not significant |
| 3764 | GO_PROTEIN_MATURATION_BY_PROTEIN_FOLDING                   | -1.21 | 0.60 | 0 | 0 | 0 | not significant |
| 3765 | GO_MITOCHONDRIAL_DNA_REPLICATION                           | -1.21 | 0.59 | 0 | 0 | 0 | not significant |
| 3766 | GO_NEGATIVE_REGULATION_OF_ENDOPLASMIC_RETICULUM_CALCIIUM_  | -1.21 | 0.59 | 0 | 0 | 0 | not significant |
| 3767 | GO POSITIVE REGULATION OF EXTRINSIC APOPTOTIC SIGNALING PA | -1.21 | 0.59 | 0 | 0 | 0 | not significant |
| 3768 | GO_HISTONE_METHYLTRANSFERASE_BINDING                       | -1.21 | 0.58 | 0 | 0 | 0 | not significant |
| 3769 | GO_REGULATION_OF_INTEGRIN_MEDIATED_SIGNALING_PATHWAY       | -1.21 | 0.58 | 0 | 0 | 0 | not significant |
| 3770 | GO_REGULATION_OF_MONOCYTE_CHEMOTAXIS                       | -1.21 | 0.58 | 0 | 0 | 0 | not significant |
| 3771 | GO_WASH_COMPLEX                                            | -1.21 | 0.58 | 0 | 0 | 0 | not significant |
| 3772 | REACTOME_CAMK_IV_MEDIATED_PHOSPHORYLATION_OF_CREB          | -1.21 | 0.58 | 0 | 0 | 0 | not significant |
| 3773 | REACTOME_COENZYME_A_BIOSYNTHESIS                           | -1.21 | 0.58 | 0 | 0 | 0 | not significant |
| 3774 | GO_ALDITOL_CATABOLIC_PROCESS                               | -1.21 | 0.57 | 0 | 0 | 0 | not significant |
| 3775 | GO_CLEAVAGE_FURROW_FORMATION                               | -1.21 | 0.57 | 0 | 0 | 0 | not significant |
| 3776 | GO_L_GLUTAMATE_IMPORT                                      | -1.21 | 0.57 | 0 | 0 | 0 | not significant |
| 3777 | GO_PORIN_ACTIVITY                                          | -1.21 | 0.57 | 0 | 0 | 0 | not significant |
| 3778 | GO_NEGATIVE_REGULATION_OF_RNA_POLYMERASE_II_REGULATORY_F   | -1.21 | 0.56 | 0 | 0 | 0 | not significant |
| 3779 | GO_CELL_CYCLE_PROCESS                                      | -1.20 | 4.00 | 0 | 0 | 0 | not significant |
| 3780 | CHARAFE_BREAST_CANCER_LUMINAL_VS_MESENCHYMAL_DN            | -1.20 | 1.30 | 0 | 0 | 0 | not significant |
| 3781 | GO_CELL_LEADING_EDGE                                       | -1.20 | 1.29 | 0 | 0 | 0 | not significant |
| 3782 | GO_CELL_CYCLE_G1_S_PHASE_TRANSITION                        | -1.20 | 1.24 | 0 | 0 | 0 | not significant |
| 3783 | CHYLA_CBFA2T3_TARGETS_UP                                   | -1.20 | 1.06 | 0 | 0 | 0 | not significant |
| 3784 | REACTOME_INTRA_GOLGI_AND_RETROGRADE_GOLGI_TO_ER_TRAFFIC    | -1.20 | 1.05 | 0 | 0 | 0 | not significant |
| 3785 | GO_DRUG_METABOLIC_PROCESS                                  | -1.20 | 1.01 | 0 | 0 | 0 | not significant |
| 3786 | GO_HELICASE_ACTIVITY                                       | -1.20 | 0.97 | 0 | 0 | 0 | not significant |
| 3787 | GO_CARDIAC_MUSCLE_TISSUE_DEVELOPMENT                       | -1.20 | 0.94 | 0 | 0 | 0 | not significant |
| 3788 | GO_OSTEOBLAST_DIFFERENTIATION                              | -1.20 | 0.89 | 0 | 0 | 0 | not significant |
| 3789 | P53_DN.V1_UP                                               | -1.20 | 0.89 | 0 | 0 | 0 | not significant |
| 3790 | GO_POSITIVE_REGULATION_OF_LIPID_METABOLIC_PROCESS          | -1.20 | 0.88 | 0 | 0 | 0 | not significant |
| 3791 | BURTON_ADIPOGENESIS_8                                      | -1.20 | 0.84 | 0 | 0 | 0 | not significant |
| 3792 | GO_NEGATIVE_REGULATION_OF_CELLULAR_PROTEIN_LOCALIZATION    | -1.20 | 0.84 | 0 | 0 | 0 | not significant |
| 3793 | CHR2P13                                                    | -1.20 | 0.82 | 0 | 0 | 0 | not significant |
| 3794 | REACTOME_COP11_MEDIATED_VESICLE_TRANSPORT                  | -1.20 | 0.82 | 0 | 0 | 0 | not significant |
| 3795 | BASSO_CD40_SIGNALING_DN                                    | -1.20 | 0.81 | 0 | 0 | 0 | not significant |
| 3796 | GROSS_HYPOXIA_VIA_HIF1A_DN                                 | -1.20 | 0.81 | 0 | 0 | 0 | not significant |
| 3797 | HOEBEKE_LYMPHOID_STEM_CELL_DN                              | -1.20 | 0.81 | 0 | 0 | 0 | not significant |
| 3798 | BURTON_ADIPOGENESIS_PEAK_AT_16HR                           | -1.20 | 0.78 | 0 | 0 | 0 | not significant |
| 3799 | GO_DNA_HELICASE_ACTIVITY                                   | -1.20 | 0.78 | 0 | 0 | 0 | not significant |
| 3800 | POMEROY_MEDULLOBLASTOMA_DESMOPLASIC_VS_CLASSIC_UP          | -1.20 | 0.77 | 0 | 0 | 0 | not significant |
| 3801 | GO_ATP_DEPENDENT_DNA_HELICASE_ACTIVITY                     | -1.20 | 0.74 | 0 | 0 | 0 | not significant |
| 3802 | GO_NUCLEOSIDE_TRIPHOSPHATE_BIOSYNTHETIC_PROCESS            | -1.20 | 0.74 | 0 | 0 | 0 | not significant |
| 3803 | GO_NERVE_DEVELOPMENT                                       | -1.20 | 0.73 | 0 | 0 | 0 | not significant |

|      |                                                             |       |      |   |   |   |                 |
|------|-------------------------------------------------------------|-------|------|---|---|---|-----------------|
| 3804 | REACTOME_PEROXISOMAL_PROTEIN_IMPORT                         | -1.20 | 0.72 | 0 | 0 | 0 | not significant |
| 3805 | GO_MUSCLE_CELL_MIGRATION                                    | -1.20 | 0.71 | 0 | 0 | 0 | not significant |
| 3806 | GO_TERTIARY_GRANULE_LUMEN                                   | -1.20 | 0.71 | 0 | 0 | 0 | not significant |
| 3807 | HOSHIDA_LIVER_CANCER_LATE_RECURRENT_UP                      | -1.20 | 0.71 | 0 | 0 | 0 | not significant |
| 3808 | BECKER_TAMOXIFEN_RESISTANCE_UP                              | -1.20 | 0.70 | 0 | 0 | 0 | not significant |
| 3809 | GO_BLOOD_MICROPARTICLE                                      | -1.20 | 0.70 | 0 | 0 | 0 | not significant |
| 3810 | GO_NEURAL_CREST_CELL_DIFFERENTIATION                        | -1.20 | 0.69 | 0 | 0 | 0 | not significant |
| 3811 | GAZDA_DIAMOND_BLACKFAN_ANEMIA_PROGENITOR_UP                 | -1.20 | 0.68 | 0 | 0 | 0 | not significant |
| 3812 | GO_U12_TYPE_SPLICEOSOMAL_COMPLEX                            | -1.20 | 0.68 | 0 | 0 | 0 | not significant |
| 3813 | BANDRES_RESPONSE_TO_CARMUSTIN_WITHOUT_MGMT_48HR_DN          | -1.20 | 0.67 | 0 | 0 | 0 | not significant |
| 3814 | GO_CELLULAR_RESPONSE_TO_GAMMA_RADIATION                     | -1.20 | 0.67 | 0 | 0 | 0 | not significant |
| 3815 | GO_ONE_CARBON_METABOLIC_PROCESS                             | -1.20 | 0.67 | 0 | 0 | 0 | not significant |
| 3816 | REACTOME_MITOPHAGY                                          | -1.20 | 0.67 | 0 | 0 | 0 | not significant |
| 3817 | GO_CELLULAR_RESPONSE_TO_DSRNA                               | -1.20 | 0.66 | 0 | 0 | 0 | not significant |
| 3818 | REACTOME_MRNA_DECAY_BY_3_TO_5_EXORIBONUCLEASE               | -1.20 | 0.66 | 0 | 0 | 0 | not significant |
| 3819 | APPIERTO_RESPONSE_TO_FENRETINIDE_UP                         | -1.20 | 0.65 | 0 | 0 | 0 | not significant |
| 3820 | GO_FATTY_ACID_TRANSMEMBRANE_TRANSPORT                       | -1.20 | 0.65 | 0 | 0 | 0 | not significant |
| 3821 | GO_SPLICEOSOMAL_TR1_SNRNP_COMPLEX_ASSEMBLY                  | -1.20 | 0.65 | 0 | 0 | 0 | not significant |
| 3822 | MORI_EMU_MYC_LYMPHOMA_BY_ONSET_TIME_DN                      | -1.20 | 0.65 | 0 | 0 | 0 | not significant |
| 3823 | CHOI_ATL_CHRONIC_VS_ACUTE_DN                                | -1.20 | 0.64 | 0 | 0 | 0 | not significant |
| 3824 | LIAO_HAVE_SOX4_BINDING_SITES                                | -1.20 | 0.64 | 0 | 0 | 0 | not significant |
| 3825 | GO_T_CELL_CYTOKINE_PRODUCTION                               | -1.20 | 0.63 | 0 | 0 | 0 | not significant |
| 3826 | REACTOME_GENERATION_OF_SECOND_MESSENGER_MOLECULES           | -1.20 | 0.63 | 0 | 0 | 0 | not significant |
| 3827 | REACTOME_REGULATION_OF_F2D_BY_UBIQUITINATION                | -1.20 | 0.63 | 0 | 0 | 0 | not significant |
| 3828 | DEN_INTERACT_WITH_LC45                                      | -1.20 | 0.62 | 0 | 0 | 0 | not significant |
| 3829 | GO_GOLGI_TO_VACUOLE_TRANSPORT                               | -1.20 | 0.62 | 0 | 0 | 0 | not significant |
| 3830 | GO_LINOLEIC_ACID_METABOLIC_PROCESS                          | -1.20 | 0.62 | 0 | 0 | 0 | not significant |
| 3831 | GO_NEGATIVE_REGULATION_OF_PROTEIN_KINASE_ACTIVITY_BY_REGULI | -1.20 | 0.62 | 0 | 0 | 0 | not significant |
| 3832 | GO_PROTEIN_DENEDDYLATION                                    | -1.20 | 0.62 | 0 | 0 | 0 | not significant |
| 3833 | HAHTOLA_CTCL_PATHOGENESIS                                   | -1.20 | 0.62 | 0 | 0 | 0 | not significant |
| 3834 | GO_TRNA_WOBBLE_URIDINE_MODIFICATION                         | -1.20 | 0.61 | 0 | 0 | 0 | not significant |
| 3835 | GO_VENTRICULAR_CARDIAC_MUSCLE_CELL_MEMBRANE_REPOLARIZATI    | -1.20 | 0.61 | 0 | 0 | 0 | not significant |
| 3836 | REACTOME_REGULATION_OF_TP53_ACTIVITY_THROUGH_ASSOCIATION    | -1.20 | 0.61 | 0 | 0 | 0 | not significant |
| 3837 | GO_POLYAMINE_METABOLIC_PROCESS                              | -1.20 | 0.60 | 0 | 0 | 0 | not significant |
| 3838 | GO_POSITIVE_REGULATION_OF_MITOCHONDRIAL_TRANSLATION         | -1.20 | 0.60 | 0 | 0 | 0 | not significant |
| 3839 | KEGG_RETINOL_METABOLISM                                     | -1.20 | 0.60 | 0 | 0 | 0 | not significant |
| 3840 | ANASTASSIOU_MULTICANCER_INVASIVENESS_SIGNATURE              | -1.20 | 0.59 | 0 | 0 | 0 | not significant |
| 3841 | GO_HEPATOCTYTE_DIFFERENTIATION                              | -1.20 | 0.59 | 0 | 0 | 0 | not significant |
| 3842 | GO_POSITIVE_REGULATION_OF_GONAD_DEVELOPMENT                 | -1.20 | 0.59 | 0 | 0 | 0 | not significant |
| 3843 | GO_SUCCINATE_METABOLIC_PROCESS                              | -1.20 | 0.58 | 0 | 0 | 0 | not significant |
| 3844 | NIELSEN_MALIGNANT_FIBROUS_HISTIOCYTOMA_UP                   | -1.20 | 0.58 | 0 | 0 | 0 | not significant |
| 3845 | REACTOME_INCREMENTAL_SYNTHESIS_SECRETION_AND_INACTIVATION   | -1.20 | 0.58 | 0 | 0 | 0 | not significant |
| 3846 | SHIRAIHI_PLZF_TARGETS_UP                                    | -1.20 | 0.58 | 0 | 0 | 0 | not significant |
| 3847 | GO_ANGIOTENSIN_ACTIVATED_SIGNALING_PATHWAY                  | -1.20 | 0.57 | 0 | 0 | 0 | not significant |
| 3848 | GO_OXIDOREDUCTASE_ACTIVITY_ACTING_ON_NAD_P_H_OXYGEN_AS_A    | -1.20 | 0.57 | 0 | 0 | 0 | not significant |
| 3849 | GO_PURINE_RIBONUCLEOSIDE_SALVAGE                            | -1.20 | 0.57 | 0 | 0 | 0 | not significant |
| 3850 | GO_RIBOSOMAL_SMALL_SUBUNIT_EXPORT_FROM_NUCLEUS              | -1.20 | 0.56 | 0 | 0 | 0 | not significant |
| 3851 | GO_SERINE_TRANSPORT                                         | -1.20 | 0.56 | 0 | 0 | 0 | not significant |
| 3852 | CHR2Q13                                                     | -1.20 | 0.55 | 0 | 0 | 0 | not significant |
| 3853 | GO_NEGATIVE_REGULATION_OF_SKELETAL_MUSCLE_TISSUE_DEVELOP    | -1.20 | 0.55 | 0 | 0 | 0 | not significant |
| 3854 | GO_POSITIVE_REGULATION_OF_ATTACHMENT_OF_SPINDLE_MICROTUB    | -1.20 | 0.54 | 0 | 0 | 0 | not significant |
| 3855 | GO_RESPONSE_TO_MUSCLE_INACTIVITY                            | -1.20 | 0.54 | 0 | 0 | 0 | not significant |
| 3856 | GRAESSMANN_APOPTOSIS_BY_DOXORUBICIN_DN                      | -1.19 | 4.00 | 0 | 0 | 0 | not significant |
| 3857 | GO_STRUCTURAL_MOLECULE_ACTIVITY                             | -1.19 | 1.45 | 0 | 0 | 0 | not significant |
| 3858 | GO_REGULATION_OF_CELLULAR_AMIDE_METABOLIC_PROCESS           | -1.19 | 1.33 | 0 | 0 | 0 | not significant |
| 3859 | MARTINEZ_TP53_TARGETS_UP                                    | -1.19 | 1.30 | 0 | 0 | 0 | not significant |
| 3860 | GO_NEGATIVE_REGULATION_OF_ORGANELLE_ORGANIZATION            | -1.19 | 1.25 | 0 | 0 | 0 | not significant |
| 3861 | GO_CHROMOSOME_SEGREGATION                                   | -1.19 | 1.16 | 0 | 0 | 0 | not significant |
| 3862 | GO_NUCLEAR_CHROMOSOME_SEGREGATION                           | -1.19 | 1.05 | 0 | 0 | 0 | not significant |
| 3863 | GO_POSITIVE_REGULATION_OF_LYMPHOCYTE_ACTIVATION             | -1.19 | 1.05 | 0 | 0 | 0 | not significant |
| 3864 | REACTOME_TRANSPORT_TO_THE_GOLGI_AND_SUBSEQUENT_MODIFIC      | -1.19 | 0.96 | 0 | 0 | 0 | not significant |
| 3865 | GO_TELENCEPHALON_DEVELOPMENT                                | -1.19 | 0.95 | 0 | 0 | 0 | not significant |
| 3866 | GO_REGULATION_OF_LEUKOCYTE_PROLIFERATION                    | -1.19 | 0.94 | 0 | 0 | 0 | not significant |
| 3867 | KRAS_DF_V1_UP                                               | -1.19 | 0.94 | 0 | 0 | 0 | not significant |
| 3868 | GO_REGULATION_OF_PROTEIN_LOCALIZATION_TO_NUCLEUS            | -1.19 | 0.93 | 0 | 0 | 0 | not significant |
| 3869 | GO_VIRAL_GENOME_REPLICATION                                 | -1.19 | 0.89 | 0 | 0 | 0 | not significant |
| 3870 | ELVIDGE_HYPOXIA_UP                                          | -1.19 | 0.88 | 0 | 0 | 0 | not significant |
| 3871 | GO_EPIDERMAL_CELL_DIFFERENTIATION                           | -1.19 | 0.88 | 0 | 0 | 0 | not significant |
| 3872 | GO_POSITIVE_REGULATION_OF_CYSTEINE_TYPE_ENDOPEPTIDASE_ACT   | -1.19 | 0.88 | 0 | 0 | 0 | not significant |
| 3873 | RODWELL_AGING_KIDNEY_NO_BLOOD_DN                            | -1.19 | 0.88 | 0 | 0 | 0 | not significant |
| 3874 | GO_TRANSLATION_REGULATOR_ACTIVITY_NUCLEIC_ACID_BINDING      | -1.19 | 0.85 | 0 | 0 | 0 | not significant |
| 3875 | GALE_APL_WITH_FLT3_MUTATED_UP                               | -1.19 | 0.80 | 0 | 0 | 0 | not significant |
| 3876 | GO_NUCLEOSIDE_PHOSPHATE_CATABOLIC_PROCESS                   | -1.19 | 0.80 | 0 | 0 | 0 | not significant |
| 3877 | GO_REGULATION_OF_LIPID_LOCALIZATION                         | -1.19 | 0.80 | 0 | 0 | 0 | not significant |
| 3878 | GO_NEGATIVE_REGULATION_OF_NUCLEAR_DIVISION                  | -1.19 | 0.78 | 0 | 0 | 0 | not significant |
| 3879 | HADDAD_T_LYMPHOCYTE_AND_NK_PROGENITOR_UP                    | -1.19 | 0.75 | 0 | 0 | 0 | not significant |
| 3880 | GO_NECROTIC_CELL_DEATH                                      | -1.19 | 0.74 | 0 | 0 | 0 | not significant |
| 3881 | GO_POSITIVE_REGULATION_OF_ACTIN_FILAMENT_BUNDLE_ASSEMBLY    | -1.19 | 0.74 | 0 | 0 | 0 | not significant |
| 3882 | GO_POSITIVE_REGULATION_OF_DNA_BINDING                       | -1.19 | 0.74 | 0 | 0 | 0 | not significant |
| 3883 | CHR11Q23                                                    | -1.19 | 0.73 | 0 | 0 | 0 | not significant |
| 3884 | GO_WATER_SOLUBLE_VITAMIN_METABOLIC_PROCESS                  | -1.19 | 0.72 | 0 | 0 | 0 | not significant |
| 3885 | THEILGAARD_NEUTROPHIL_AT_SKIN_WOUND_UP                      | -1.19 | 0.72 | 0 | 0 | 0 | not significant |
| 3886 | LINDVALL_IMMORTALIZED_BY_TERT_UP                            | -1.19 | 0.71 | 0 | 0 | 0 | not significant |
| 3887 | GO_REGULATION_OF_LIPID_TRANSPORT                            | -1.19 | 0.70 | 0 | 0 | 0 | not significant |
| 3888 | GO_TRANSLATION_INITIATION_FACTOR_ACTIVITY                   | -1.19 | 0.70 | 0 | 0 | 0 | not significant |
| 3889 | PID_ERBB1_INTERNALIZATION_PATHWAY                           | -1.19 | 0.70 | 0 | 0 | 0 | not significant |
| 3890 | GO_CELLULAR_AMINO_ACID_CATABOLIC_PROCESS                    | -1.19 | 0.69 | 0 | 0 | 0 | not significant |
| 3891 | GO_NADP_BINDING                                             | -1.19 | 0.69 | 0 | 0 | 0 | not significant |
| 3892 | HALLMARK_NOTCH_SIGNALING                                    | -1.19 | 0.69 | 0 | 0 | 0 | not significant |
| 3893 | ASTON_MAJOR_DEPRESSIVE_DISORDER_UP                          | -1.19 | 0.68 | 0 | 0 | 0 | not significant |
| 3894 | GO_CELLULAR_MODIFIED_AMINO_ACID_BIOSYNTHETIC_PROCESS        | -1.19 | 0.68 | 0 | 0 | 0 | not significant |
| 3895 | GO_EXTRINSIC_COMPONENT_OF_ORGANELLE_MEMBRANE                | -1.19 | 0.68 | 0 | 0 | 0 | not significant |
| 3896 | GO_NEGATIVE_REGULATION_OF_METAPHASE_ANAPHASE_TRANSITION     | -1.19 | 0.68 | 0 | 0 | 0 | not significant |
| 3897 | GO_RESPONSE_TO_COLD                                         | -1.19 | 0.68 | 0 | 0 | 0 | not significant |
| 3898 | BIOCARTA_FCER1_PATHWAY                                      | -1.19 | 0.67 | 0 | 0 | 0 | not significant |
| 3899 | ZHANG_GATA6_TARGETS_DN                                      | -1.19 | 0.67 | 0 | 0 | 0 | not significant |
| 3900 | BROWNE_HCMV_INFECTION_4HR_UP                                | -1.19 | 0.66 | 0 | 0 | 0 | not significant |
| 3901 | GO_NUCLEOBASE_CONTAINING_SMALL_MOLECULE_INTERCONVERSION     | -1.19 | 0.66 | 0 | 0 | 0 | not significant |
| 3902 | GO_POSITIVE_REGULATION_OF_CALCIIUM_MEDIATED_SIGNALING       | -1.19 | 0.66 | 0 | 0 | 0 | not significant |
| 3903 | GO_REGULATION_OF_TRANSLATIONAL_FIDELITY                     | -1.19 | 0.66 | 0 | 0 | 0 | not significant |
| 3904 | MCCLUNG_DELTA_FOSB_TARGETS_8WK                              | -1.19 | 0.65 | 0 | 0 | 0 | not significant |
| 3905 | CHR5Q12                                                     | -1.19 | 0.64 | 0 | 0 | 0 | not significant |
| 3906 | DORN_ADENOVIRUS_INFECTION_32HR_DN                           | -1.19 | 0.64 | 0 | 0 | 0 | not significant |
| 3907 | GO_RESPONSE_TO_X_RAY                                        | -1.19 | 0.64 | 0 | 0 | 0 | not significant |
| 3908 | PID_LIS1_PATHWAY                                            | -1.19 | 0.64 | 0 | 0 | 0 | not significant |
| 3909 | GO_EMBRYONIC_EYE_MORPHOGENESIS                              | -1.19 | 0.63 | 0 | 0 | 0 | not significant |
| 3910 | GO_MHC_CLASS_II_PROTEIN_COMPLEX_BINDING                     | -1.19 | 0.63 | 0 | 0 | 0 | not significant |
| 3911 | GO_NEGATIVE_REGULATION_OF_NUCLEOCYTOPLASMIC_TRANSPORT       | -1.19 | 0.63 | 0 | 0 | 0 | not significant |
| 3912 | GRADE_COLON_CANCER_DN                                       | -1.19 | 0.63 | 0 | 0 | 0 | not significant |

|      |                                                             |       |      |   |   |   |                 |
|------|-------------------------------------------------------------|-------|------|---|---|---|-----------------|
| 3913 | GO_ASYMMETRIC_CELL_DIVISION                                 | -1.19 | 0.62 | 0 | 0 | 0 | not significant |
| 3914 | GO_MONOCARBOXYLIC_ACID_TRANSMEMBRANE_TRANSPORTER_ACTV       | -1.19 | 0.62 | 0 | 0 | 0 | not significant |
| 3915 | LI_WILMS_TUMOR_VS_FETAL_KIDNEY_2_DN                         | -1.19 | 0.62 | 0 | 0 | 0 | not significant |
| 3916 | GO_DYNEIN_INTERMEDIATE_CHAIN_BINDING                        | -1.19 | 0.61 | 0 | 0 | 0 | not significant |
| 3917 | GO_FATTY_ACID_DERIVATIVE_CATABOLIC_PROCESS                  | -1.19 | 0.61 | 0 | 0 | 0 | not significant |
| 3918 | GO_REGULATION_OF_CELL_MATURATION                            | -1.19 | 0.61 | 0 | 0 | 0 | not significant |
| 3919 | REACTOME_SYNTHESIS_SECRETION_AND_INACTIVATION_OF_GLUCOSE    | -1.19 | 0.61 | 0 | 0 | 0 | not significant |
| 3920 | WENG_POR_TARGETS_GLOBAL_DN                                  | -1.19 | 0.60 | 0 | 0 | 0 | not significant |
| 3921 | GO_POSITIVE_REGULATION_OF_ENDOPLASMIC_RETICULUM_UNFOLDED    | -1.19 | 0.59 | 0 | 0 | 0 | not significant |
| 3922 | GO_SNORNA_PROCESSING                                        | -1.19 | 0.59 | 0 | 0 | 0 | not significant |
| 3923 | GO_G_QUADRUPLEX_DNA_BINDING                                 | -1.19 | 0.58 | 0 | 0 | 0 | not significant |
| 3924 | GO_JUN_KINASE_KINASE_KINASE_ACTIVITY                        | -1.19 | 0.58 | 0 | 0 | 0 | not significant |
| 3925 | GO_NUCLEAR_CYCLIN_DEPENDENT_PROTEIN_KINASE_HOLOENZYME_CC    | -1.19 | 0.58 | 0 | 0 | 0 | not significant |
| 3926 | GO_RESPONSE_TO_MANGANESE_ION                                | -1.19 | 0.58 | 0 | 0 | 0 | not significant |
| 3927 | GO_TRANSLOCATION_OF_MOLECULES_INTO_HOST                     | -1.19 | 0.58 | 0 | 0 | 0 | not significant |
| 3928 | GOLUB_ALL_VS_AML_DN                                         | -1.19 | 0.58 | 0 | 0 | 0 | not significant |
| 3929 | KEGG_STEROID_HORMONE_BIOSYNTHESIS                           | -1.19 | 0.58 | 0 | 0 | 0 | not significant |
| 3930 | MIKKELSEN_IPS_WITH_HCP_H3K27ME3                             | -1.19 | 0.58 | 0 | 0 | 0 | not significant |
| 3931 | GO_EXTRINSIC_COMPONENT_OF_ENDOSOME_MEMBRANE                 | -1.19 | 0.57 | 0 | 0 | 0 | not significant |
| 3932 | GO_KINETOCHORE_ASSEMBLY                                     | -1.19 | 0.57 | 0 | 0 | 0 | not significant |
| 3933 | GO_STEROL_IMPORT                                            | -1.19 | 0.57 | 0 | 0 | 0 | not significant |
| 3934 | GO_STRESS_INDUCED_PREMATURE_SENESCENCE                      | -1.19 | 0.57 | 0 | 0 | 0 | not significant |
| 3935 | GO_UTERUS_DEVELOPMENT                                       | -1.19 | 0.57 | 0 | 0 | 0 | not significant |
| 3936 | REACTOME_ROBO_RECEPTORS_BIND_AKAP5                          | -1.19 | 0.57 | 0 | 0 | 0 | not significant |
| 3937 | REACTOME_SYNTHESIS_OF_BILE_ACIDS_AND_BILE_SALTS_VIA_27_HYDI | -1.19 | 0.57 | 0 | 0 | 0 | not significant |
| 3938 | GO_SECRETION_OF_LYSOSOMAL_ENZYMES                           | -1.19 | 0.56 | 0 | 0 | 0 | not significant |
| 3939 | KUWANO_RNA_STABILIZED_BY_NO                                 | -1.19 | 0.56 | 0 | 0 | 0 | not significant |
| 3940 | DELASERNA_TARGETS_OF_MYOD_AND_SMARCA4                       | -1.19 | 0.55 | 0 | 0 | 0 | not significant |
| 3941 | GO_ESTABLISHMENT_OF_CENTROSOME_LOCALIZATION                 | -1.19 | 0.55 | 0 | 0 | 0 | not significant |
| 3942 | GO_POSITIVE_REGULATION_OF_RECEPTOR_BIOSYNTHETIC_PROCESS     | -1.19 | 0.55 | 0 | 0 | 0 | not significant |
| 3943 | GO_SEX_CHROMATIN                                            | -1.19 | 0.55 | 0 | 0 | 0 | not significant |
| 3944 | GO_SIGNAL_PEPTIDASE_COMPLEX                                 | -1.19 | 0.55 | 0 | 0 | 0 | not significant |
| 3945 | GO_SUCCINYL_COA_METABOLIC_PROCESS                           | -1.19 | 0.55 | 0 | 0 | 0 | not significant |
| 3946 | GO_EARLY_ENDOSOME_TO_GOLGI_TRANSPORT                        | -1.19 | 0.54 | 0 | 0 | 0 | not significant |
| 3947 | GO_NEGATIVE_REGULATION_OF_PEPTIDYL_CYSTEINE_S_NITROSYLATIC  | -1.19 | 0.54 | 0 | 0 | 0 | not significant |
| 3948 | GO_PERICHROMATIN_FIBRILS                                    | -1.19 | 0.54 | 0 | 0 | 0 | not significant |
| 3949 | GO_POSITIVE_REGULATION_OF_NEURON_PROJECTION_REGENERATION    | -1.19 | 0.54 | 0 | 0 | 0 | not significant |
| 3950 | GO_REGULATION_OF_DEVELOPMENT_HETEROCHRONIC                  | -1.19 | 0.54 | 0 | 0 | 0 | not significant |
| 3951 | GO_REGULATION_OF_NEUROMUSCULAR_JUNCTION_DEVELOPMENT         | -1.19 | 0.54 | 0 | 0 | 0 | not significant |
| 3952 | GO_REGULATION_OF_WNT_SIGNALING_PATHWAY_PLANAR_CELL_POLA     | -1.19 | 0.54 | 0 | 0 | 0 | not significant |
| 3953 | GO_U1_SNRNP_BINDING                                         | -1.19 | 0.54 | 0 | 0 | 0 | not significant |
| 3954 | REACTOME_TYSDN1_CLEAVES_PEROXISOMAL_PROTEINS                | -1.19 | 0.53 | 0 | 0 | 0 | not significant |
| 3955 | GO_MECHANOSENSORY_BEHAVIOR                                  | -1.19 | 0.52 | 0 | 0 | 0 | not significant |
| 3956 | GO_FEMALE_MEIOSIS_CHROMOSOME_SEGREGATION                    | -1.19 | 0.51 | 0 | 0 | 0 | not significant |
| 3957 | GO_POSITIVE_REGULATION_OF_ER_ASSOCIATED_UBIQUITIN_DEPENDEN  | -1.19 | 0.51 | 0 | 0 | 0 | not significant |
| 3958 | GO_SECRETORY_GRANULE                                        | -1.18 | 1.96 | 0 | 0 | 0 | not significant |
| 3959 | GO_REGULATION_OF_CELL_DEATH                                 | -1.18 | 1.91 | 0 | 0 | 0 | not significant |
| 3960 | PWJANA_ATM_PCC_NETWORK                                      | -1.18 | 1.82 | 0 | 0 | 0 | not significant |
| 3961 | GO_SECRETORY_VESICLE                                        | -1.18 | 1.68 | 0 | 0 | 0 | not significant |
| 3962 | BENPORATH_CYCLING_GENES                                     | -1.18 | 1.59 | 0 | 0 | 0 | not significant |
| 3963 | GO_CARDIOVASCULAR_SYSTEM_DEVELOPMENT                        | -1.18 | 1.46 | 0 | 0 | 0 | not significant |
| 3964 | GO_SIGNAL_TRANSDUCTION_BY_PROTEIN_PHOSPHORYLATION           | -1.18 | 1.36 | 0 | 0 | 0 | not significant |
| 3965 | GO_IMPORT_INTO_CELL                                         | -1.18 | 1.34 | 0 | 0 | 0 | not significant |
| 3966 | GO_CELLULAR_CHEMICAL_HOMEOSTASIS                            | -1.18 | 1.29 | 0 | 0 | 0 | not significant |
| 3967 | GO_NUCLEAR_ENVELOPE                                         | -1.18 | 1.29 | 0 | 0 | 0 | not significant |
| 3968 | GO_REGULATION_OF_DEFENSE_RESPONSE                           | -1.18 | 1.25 | 0 | 0 | 0 | not significant |
| 3969 | GO_MULTICELLULAR_ORGANISMAL_HOMEOSTASIS                     | -1.18 | 1.20 | 0 | 0 | 0 | not significant |
| 3970 | GO_RESPONSE_TO_PEPTIDE                                      | -1.18 | 1.18 | 0 | 0 | 0 | not significant |
| 3971 | GO_EPITHELIAL_CELL_DIFFERENTIATION                          | -1.18 | 1.17 | 0 | 0 | 0 | not significant |
| 3972 | REACTOME_METABOLISM_OF_AMINO_ACIDS_AND_DERIVATIVES          | -1.18 | 1.15 | 0 | 0 | 0 | not significant |
| 3973 | GO_MONOVALENT_INORGANIC_CATION_TRANSPORT                    | -1.18 | 1.07 | 0 | 0 | 0 | not significant |
| 3974 | REACTOME_INTRACELLULAR_SIGNALING_BY_SECOND_MESSENGERS       | -1.18 | 1.07 | 0 | 0 | 0 | not significant |
| 3975 | GO_PROTEIN_LOCALIZATION_TO_NUCLEUS                          | -1.18 | 1.04 | 0 | 0 | 0 | not significant |
| 3976 | GO_SECOND_MESSENGER_MEDIATED_SIGNALING                      | -1.18 | 0.98 | 0 | 0 | 0 | not significant |
| 3977 | GO_NEGATIVE_REGULATION_OF_CELL_MOTILITY                     | -1.18 | 0.97 | 0 | 0 | 0 | not significant |
| 3978 | HOXA9_DN.V1_DN                                              | -1.18 | 0.97 | 0 | 0 | 0 | not significant |
| 3979 | GO_DNA_BIOSYNTHETIC_PROCESS                                 | -1.18 | 0.96 | 0 | 0 | 0 | not significant |
| 3980 | GO_NEGATIVE_REGULATION_OF_CHROMOSOME_ORGANIZATION           | -1.18 | 0.95 | 0 | 0 | 0 | not significant |
| 3981 | SANSOM_APC_TARGETS                                          | -1.18 | 0.92 | 0 | 0 | 0 | not significant |
| 3982 | GO_REGULATION_OF_PROTEIN_BINDING                            | -1.18 | 0.91 | 0 | 0 | 0 | not significant |
| 3983 | GO_REGULATION_OF_CYTOSOLIC_CALCIIUM_ION_CONCENTRATION       | -1.18 | 0.89 | 0 | 0 | 0 | not significant |
| 3984 | GO_ADAPTIVE_THERMOGENESIS                                   | -1.18 | 0.88 | 0 | 0 | 0 | not significant |
| 3985 | GO_TEMPERATURE_HOMEOSTASIS                                  | -1.18 | 0.87 | 0 | 0 | 0 | not significant |
| 3986 | CHR14Q24                                                    | -1.18 | 0.85 | 0 | 0 | 0 | not significant |
| 3987 | GO_ESTABLISHMENT_OF_CELL_POLARITY                           | -1.18 | 0.83 | 0 | 0 | 0 | not significant |
| 3988 | ROESSLER_LIVER_CANCER_METASTASIS_UP                         | -1.18 | 0.83 | 0 | 0 | 0 | not significant |
| 3989 | GO_ENTRY_INTO_OTHER_ORGANISM_INVOLVED_IN_SYMBIOTIC_INTERA   | -1.18 | 0.81 | 0 | 0 | 0 | not significant |
| 3990 | GO_MICROTUBULE_MOTOR_ACTIVITY                               | -1.18 | 0.80 | 0 | 0 | 0 | not significant |
| 3991 | GO_SPINDLE_ASSEMBLY                                         | -1.18 | 0.78 | 0 | 0 | 0 | not significant |
| 3992 | PICCALUGA_ANGIOIMMUNOBLASTIC_LYMPHOMA_UP                    | -1.18 | 0.76 | 0 | 0 | 0 | not significant |
| 3993 | GO_CHAPERONE_BINDING                                        | -1.18 | 0.75 | 0 | 0 | 0 | not significant |
| 3994 | GO_KIDNEY_EPITHELIUM_DEVELOPMENT                            | -1.18 | 0.75 | 0 | 0 | 0 | not significant |
| 3995 | REACTOME_RECRUITMENT_OF_NUMA_TO_MITOTIC_CENTROSOMES         | -1.18 | 0.75 | 0 | 0 | 0 | not significant |
| 3996 | CARD_MIR302A_TARGETS                                        | -1.18 | 0.74 | 0 | 0 | 0 | not significant |
| 3997 | REACTOME_NUCLEOSOME_ASSEMBLY                                | -1.18 | 0.74 | 0 | 0 | 0 | not significant |
| 3998 | RASHI_RESPONSE_TO_IONIZING_RADIATION_6                      | -1.18 | 0.73 | 0 | 0 | 0 | not significant |
| 3999 | BRUNO_HEMATOPOIESIS                                         | -1.18 | 0.71 | 0 | 0 | 0 | not significant |
| 4000 | DOANE_BREAST_CANCER_ESR1_UP                                 | -1.18 | 0.70 | 0 | 0 | 0 | not significant |
| 4001 | GO_ALCOHOL_BINDING                                          | -1.18 | 0.70 | 0 | 0 | 0 | not significant |
| 4002 | GO_RESPONSE_TO_NERVE_GROWTH_FACTOR                          | -1.18 | 0.69 | 0 | 0 | 0 | not significant |
| 4003 | GO_DICARBOXYLIC_ACID_TRANSPORT                              | -1.18 | 0.68 | 0 | 0 | 0 | not significant |
| 4004 | NADLER_OBESITY_UP                                           | -1.18 | 0.68 | 0 | 0 | 0 | not significant |
| 4005 | YORDY_RECIPROCAL_REGULATION_BY_ETS1_AND_SP100_DN            | -1.18 | 0.68 | 0 | 0 | 0 | not significant |
| 4006 | LANDIS_BREAST_CANCER_PROGRESSION_UP                         | -1.18 | 0.66 | 0 | 0 | 0 | not significant |
| 4007 | LEE_CALORIE_RESTRICTION_MUSCLE_UP                           | -1.18 | 0.65 | 0 | 0 | 0 | not significant |
| 4008 | PID_AR_NONGENOMIC_PATHWAY                                   | -1.18 | 0.65 | 0 | 0 | 0 | not significant |
| 4009 | REACTOME_DAP12_INTERACTIONS                                 | -1.18 | 0.65 | 0 | 0 | 0 | not significant |
| 4010 | TERAO_AOX4_TARGETS_HG_UP                                    | -1.18 | 0.65 | 0 | 0 | 0 | not significant |
| 4011 | GO_NEGATIVE_REGULATION_OF_REPRODUCTIVE_PROCESS              | -1.18 | 0.64 | 0 | 0 | 0 | not significant |
| 4012 | GO_OLIGOSACCHARIDE_LIPID_INTERMEDIATE_BIOSYNTHETIC_PROCESS  | -1.18 | 0.64 | 0 | 0 | 0 | not significant |
| 4013 | GO_VIRAL_RNA_GENOME_REPLICATION                             | -1.18 | 0.64 | 0 | 0 | 0 | not significant |
| 4014 | SEITZ_NEOPLASTIC_TRANSFORMATION_BY_8P_DELETION_DN           | -1.18 | 0.64 | 0 | 0 | 0 | not significant |
| 4015 | GO_MAMMARY_GLAND_MORPHOGENESIS                              | -1.18 | 0.63 | 0 | 0 | 0 | not significant |
| 4016 | GO_PROTEIN_DISULFIDE_OXIDOREDUCTASE_ACTIVITY                | -1.18 | 0.63 | 0 | 0 | 0 | not significant |
| 4017 | GO_REGULATION_OF_ACTIN_CYTOSKELETON_REORGANIZATION          | -1.18 | 0.63 | 0 | 0 | 0 | not significant |
| 4018 | GO_REGULATION_OF_CYCLASE_ACTIVITY                           | -1.18 | 0.63 | 0 | 0 | 0 | not significant |
| 4019 | CHR6Q16                                                     | -1.18 | 0.62 | 0 | 0 | 0 | not significant |
| 4020 | GAUSSMANN_MLL_AF4_FUSION_TARGETS_F_DN                       | -1.18 | 0.62 | 0 | 0 | 0 | not significant |
| 4021 | SA_CASPASE_CASCADE                                          | -1.18 | 0.62 | 0 | 0 | 0 | not significant |

|      |                                                             |       |      |   |   |   |                 |
|------|-------------------------------------------------------------|-------|------|---|---|---|-----------------|
| 4022 | GO_NUCLEAR_PORE_ORGANIZATION                                | -1.18 | 0.61 | 0 | 0 | 0 | not significant |
| 4023 | GO_POSITIVE_REGULATION_OF_INTERFERON_BETA_PRODUCTION        | -1.18 | 0.61 | 0 | 0 | 0 | not significant |
| 4024 | REACTOME_PENTOSE_PHOSPHATE_PATHWAY                          | -1.18 | 0.61 | 0 | 0 | 0 | not significant |
| 4025 | CHECK_RESPONSE_TO_HD_MTX_UP                                 | -1.18 | 0.60 | 0 | 0 | 0 | not significant |
| 4026 | GO_NUCLEAR_BODY_ORGANIZATION                                | -1.18 | 0.60 | 0 | 0 | 0 | not significant |
| 4027 | WATANABE_ULCERATIVE_COLITIS_WITH_CANCER_DN                  | -1.18 | 0.60 | 0 | 0 | 0 | not significant |
| 4028 | GO_CLATHRIN_COAT_OF_ENDOCYTIC_VESICLE                       | -1.18 | 0.59 | 0 | 0 | 0 | not significant |
| 4029 | REACTOME_REGULATION_OF_LOCALIZATION_OF_FOXP3_TRANSCRIPTIO   | -1.18 | 0.59 | 0 | 0 | 0 | not significant |
| 4030 | SILIGAN_TARGETS_OF_EWS_FLI1_FUSION_UP                       | -1.18 | 0.59 | 0 | 0 | 0 | not significant |
| 4031 | GO_HOST_CELL_PART                                           | -1.18 | 0.58 | 0 | 0 | 0 | not significant |
| 4032 | GO_REGULATION_OF_ADENYLATE_CYCLASE_ACTIVITY                 | -1.18 | 0.58 | 0 | 0 | 0 | not significant |
| 4033 | KYNG_ENVIRONMENTAL_STRESS_RESPONSE_DN                       | -1.18 | 0.58 | 0 | 0 | 0 | not significant |
| 4034 | SA_G2_AND_M_PHASES                                          | -1.18 | 0.58 | 0 | 0 | 0 | not significant |
| 4035 | GO_ACTIVATION_OF_PROTEIN_KINASE_A_ACTIVITY                  | -1.18 | 0.57 | 0 | 0 | 0 | not significant |
| 4036 | GO_MOTILE_CILIUM_ASSEMBLY                                   | -1.18 | 0.57 | 0 | 0 | 0 | not significant |
| 4037 | GO_ALCOHOL_DEHYDROGENASE_NADPLUS_ACTIVITY                   | -1.18 | 0.56 | 0 | 0 | 0 | not significant |
| 4038 | GO_CELLULAR_RESPONSE_TO_EXOGENOUS_DSRNA                     | -1.18 | 0.56 | 0 | 0 | 0 | not significant |
| 4039 | GO_HOST_INTRACELLULAR_PART                                  | -1.18 | 0.56 | 0 | 0 | 0 | not significant |
| 4040 | GO_NEGATIVE_REGULATION_OF_MYOBlast_DIFFERENTIATION          | -1.18 | 0.56 | 0 | 0 | 0 | not significant |
| 4041 | GO_NITRIC_OXIDE_SYNTHASE_BIOSYNTHETIC_PROCESS               | -1.18 | 0.56 | 0 | 0 | 0 | not significant |
| 4042 | GO_POSITIVE_REGULATION_OF_AMYLOID_BETA_FORMATION            | -1.18 | 0.56 | 0 | 0 | 0 | not significant |
| 4043 | GO_TPR_DOMAIN_BINDING                                       | -1.18 | 0.56 | 0 | 0 | 0 | not significant |
| 4044 | GO_TRACHEA_MORPHOGENESIS                                    | -1.18 | 0.56 | 0 | 0 | 0 | not significant |
| 4045 | GO_TROPOMYOSIN_BINDING                                      | -1.18 | 0.56 | 0 | 0 | 0 | not significant |
| 4046 | GO_POSITIVE_REGULATION_OF_MACROPHAGE_DIFFERENTIATION        | -1.18 | 0.55 | 0 | 0 | 0 | not significant |
| 4047 | REACTOME_CONDENSATION_OF_PROMETAPHASE_CHROMOSOMES           | -1.18 | 0.55 | 0 | 0 | 0 | not significant |
| 4048 | BIOCARTA_TSP1_PATHWAY                                       | -1.18 | 0.54 | 0 | 0 | 0 | not significant |
| 4049 | GO_NERVE_GROWTH_FACTOR_SIGNALING_PATHWAY                    | -1.18 | 0.54 | 0 | 0 | 0 | not significant |
| 4050 | LOPEZ_MESOTHELIOMA_SURVIVAL_WORST_VS_BEST_UP                | -1.18 | 0.54 | 0 | 0 | 0 | not significant |
| 4051 | REACTOME_DECTIN_2_FAMILY                                    | -1.18 | 0.54 | 0 | 0 | 0 | not significant |
| 4052 | GO_EUKARYOTIC_INITIATION_FACTOR_4E_BINDING                  | -1.18 | 0.53 | 0 | 0 | 0 | not significant |
| 4053 | GO_REGULATION_OF_MACROPHAGE_DIFFERENTIATION                 | -1.18 | 0.53 | 0 | 0 | 0 | not significant |
| 4054 | GO_NEGATIVE_REGULATION_OF_FIBROBLAST_APOPTOTIC_PROCESS      | -1.18 | 0.51 | 0 | 0 | 0 | not significant |
| 4055 | GO_REGULATION_OF_VITAMIN_D_RECEPTOR_SIGNALING_PATHWAY       | -1.18 | 0.51 | 0 | 0 | 0 | not significant |
| 4056 | GO_HEART_FIELD_SPECIFICATION                                | -1.18 | 0.50 | 0 | 0 | 0 | not significant |
| 4057 | GO_HYDROLASE_ACTIVITY_ACTING_ON_ESTER_BONDS                 | -1.17 | 2.21 | 0 | 0 | 0 | not significant |
| 4058 | GO_POSITIVE_REGULATION_OF_CATALYTIC_ACTIVITY                | -1.17 | 1.97 | 0 | 0 | 0 | not significant |
| 4059 | REACTOME_POST_TRANSLATIONAL_PROTEIN_MODIFICATION            | -1.17 | 1.92 | 0 | 0 | 0 | not significant |
| 4060 | GO_REGULATION_OF_HYDROLASE_ACTIVITY                         | -1.17 | 1.76 | 0 | 0 | 0 | not significant |
| 4061 | GO_APOPTOTIC_PROCESS                                        | -1.17 | 1.74 | 0 | 0 | 0 | not significant |
| 4062 | MARTINEZ_RB1_AND_TP53_TARGETS_UP                            | -1.17 | 1.50 | 0 | 0 | 0 | not significant |
| 4063 | SENESE_HDAC3_TARGETS_UP                                     | -1.17 | 1.15 | 0 | 0 | 0 | not significant |
| 4064 | GO_CELL_BODY                                                | -1.17 | 1.11 | 0 | 0 | 0 | not significant |
| 4065 | DUTERTRE_ESTRADIOL_RESPONSE_24HR_UP                         | -1.17 | 1.03 | 0 | 0 | 0 | not significant |
| 4066 | HALLMARK_INTERFERON_GAMMA_RESPONSE                          | -1.17 | 0.98 | 0 | 0 | 0 | not significant |
| 4067 | GO_CANONICAL_WNT_SIGNALING_PATHWAY                          | -1.17 | 0.94 | 0 | 0 | 0 | not significant |
| 4068 | KEGG_UBIQUITIN_MEDIATED_PROTEOLYSIS                         | -1.17 | 0.93 | 0 | 0 | 0 | not significant |
| 4069 | AMUNDSON_POOR_SURVIVAL_AFTER_GAMMA_RADIATION_2G             | -1.17 | 0.92 | 0 | 0 | 0 | not significant |
| 4070 | FLORIO_NEOCORTEX_BASAL_RADIAL_GLIA_UP                       | -1.17 | 0.91 | 0 | 0 | 0 | not significant |
| 4071 | JIANG_HYPOXIA_NORMAL                                        | -1.17 | 0.88 | 0 | 0 | 0 | not significant |
| 4072 | IWANAGA_CARCIINOGENESIS_BY_KRAS_UP                          | -1.17 | 0.87 | 0 | 0 | 0 | not significant |
| 4073 | FERNANDEZ_BOUND_BY_MYC                                      | -1.17 | 0.83 | 0 | 0 | 0 | not significant |
| 4074 | GO_T_CELL_MEDIATED_IMMUNITY                                 | -1.17 | 0.80 | 0 | 0 | 0 | not significant |
| 4075 | GO_POSITIVE_REGULATION_OF_EPITHELIAL_CELL_MIGRATION         | -1.17 | 0.77 | 0 | 0 | 0 | not significant |
| 4076 | XU_GH1_AUTOCRINE_TARGETS_UP                                 | -1.17 | 0.76 | 0 | 0 | 0 | not significant |
| 4077 | GO_GLUTAMINE_FAMILY_AMINO_ACID_METABOLIC_PROCESS            | -1.17 | 0.74 | 0 | 0 | 0 | not significant |
| 4078 | KEGG_RNA_DEGRADATION                                        | -1.17 | 0.74 | 0 | 0 | 0 | not significant |
| 4079 | GO_LEUKOCYTE_HOMEOSTASIS                                    | -1.17 | 0.73 | 0 | 0 | 0 | not significant |
| 4080 | GO_NEGATIVE_REGULATION_OF_PROTEIN_COMPLEX_DISASSEMBLY       | -1.17 | 0.73 | 0 | 0 | 0 | not significant |
| 4081 | GO_POSITIVE_REGULATION_OF_SMALL_MOLECULE_METABOLIC_PROCI    | -1.17 | 0.73 | 0 | 0 | 0 | not significant |
| 4082 | GO_POSITIVE_REGULATION_OF_PROTEIN_LOCALIZATION_TO_CELL_PEF  | -1.17 | 0.71 | 0 | 0 | 0 | not significant |
| 4083 | STARK_HYPOCAMPUS_22Q11_DELETION_UP                          | -1.17 | 0.69 | 0 | 0 | 0 | not significant |
| 4084 | ROVERSI_GLIOMA_COPY_NUMBER_DN                               | -1.17 | 0.68 | 0 | 0 | 0 | not significant |
| 4085 | GO_PEROXISOMAL_TRANSPORT                                    | -1.17 | 0.67 | 0 | 0 | 0 | not significant |
| 4086 | GO_POLYOL_METABOLIC_PROCESS                                 | -1.17 | 0.67 | 0 | 0 | 0 | not significant |
| 4087 | GO_POSITIVE_REGULATION_OF_G1_S_TRANSITION_OF_MITOTIC_CELL_  | -1.17 | 0.67 | 0 | 0 | 0 | not significant |
| 4088 | GO_REGULATION_OF_RELEASE_OF_CYTOCHROME_C_FROM_MITOCHO       | -1.17 | 0.67 | 0 | 0 | 0 | not significant |
| 4089 | BOYALTY_LIVER_CANCER_SUBCLASS_G3_DN                         | -1.17 | 0.66 | 0 | 0 | 0 | not significant |
| 4090 | GO_REGULATION_OF_SPROUTING_ANGIOGENESIS                     | -1.17 | 0.66 | 0 | 0 | 0 | not significant |
| 4091 | JAERVINEN_AMPLIFIED_IN_LARYNGEAL_CANCER                     | -1.17 | 0.66 | 0 | 0 | 0 | not significant |
| 4092 | GO_9PLUS2_MOTILE_CILIUM                                     | -1.17 | 0.65 | 0 | 0 | 0 | not significant |
| 4093 | GO_INTERLEUKIN_12_PRODUCTION                                | -1.17 | 0.64 | 0 | 0 | 0 | not significant |
| 4094 | MA_MYELOID_DIFFERENTIATION_DN                               | -1.17 | 0.64 | 0 | 0 | 0 | not significant |
| 4095 | GO_REGULATION_OF_LEUKOCYTE_DEGRANULATION                    | -1.17 | 0.63 | 0 | 0 | 0 | not significant |
| 4096 | MOREIRA_RESPONSE_TO_TSA_UP                                  | -1.17 | 0.63 | 0 | 0 | 0 | not significant |
| 4097 | NEMETH_INFLAMMATORY_RESPONSE_LPS_DN                         | -1.17 | 0.63 | 0 | 0 | 0 | not significant |
| 4098 | REACTOME_INTERCONVERSION_OF_NUCLEOTIDE_DI_AND_TRIPHOSPHA    | -1.17 | 0.62 | 0 | 0 | 0 | not significant |
| 4099 | GO_NEGATIVE_REGULATION_OF_CALCIIUM_ION_TRANSPORT            | -1.17 | 0.61 | 0 | 0 | 0 | not significant |
| 4100 | GO_POSITIVE_REGULATION_OF_INTERLEUKIN_12_PRODUCTION         | -1.17 | 0.61 | 0 | 0 | 0 | not significant |
| 4101 | GO_NUCLEAR_EXOSOME_RNASE_COMPLEX_                           | -1.17 | 0.60 | 0 | 0 | 0 | not significant |
| 4102 | NAKAMURA_METASTASIS_MODEL_DN                                | -1.17 | 0.60 | 0 | 0 | 0 | not significant |
| 4103 | GO_ACETYL_COA_BIOSYNTHETIC_PROCESS                          | -1.17 | 0.59 | 0 | 0 | 0 | not significant |
| 4104 | GO_CHONDROCYTE_DEVELOPMENT                                  | -1.17 | 0.59 | 0 | 0 | 0 | not significant |
| 4105 | GO_LOW_DENSITY_LIPOPROTEIN_PARTICLE_RECEPTOR_BINDING        | -1.17 | 0.59 | 0 | 0 | 0 | not significant |
| 4106 | GO_MAP_KINASE_KINASE_ACTIVITY                               | -1.17 | 0.59 | 0 | 0 | 0 | not significant |
| 4107 | GO_NUCLEAR_TRANSCRIBED_MRNA_CATABOLIC_PROCESS_EXONUCLEI     | -1.17 | 0.59 | 0 | 0 | 0 | not significant |
| 4108 | GO_PHAGOCYTTIC_CUP                                          | -1.17 | 0.59 | 0 | 0 | 0 | not significant |
| 4109 | GO_POSITIVE_REGULATION_OF_TRANSCRIPTION_FROM_RNA_POLYMEF    | -1.17 | 0.59 | 0 | 0 | 0 | not significant |
| 4110 | GO_PROTEIN_DESTABILIZATION                                  | -1.17 | 0.59 | 0 | 0 | 0 | not significant |
| 4111 | GO_CELLULAR_MODIFIED_AMINO_ACID_CATABOLIC_PROCESS           | -1.17 | 0.58 | 0 | 0 | 0 | not significant |
| 4112 | GO_REGULATION_OF_LYMPHOCYTE_CHEMOTAXIS                      | -1.17 | 0.58 | 0 | 0 | 0 | not significant |
| 4113 | GROSS_ELK3_TARGETS_DN                                       | -1.17 | 0.58 | 0 | 0 | 0 | not significant |
| 4114 | GO_CELLULAR_RESPONSE_TO_LEUCINE_STARVATION                  | -1.17 | 0.56 | 0 | 0 | 0 | not significant |
| 4115 | GO_FATTY_ACID_BETA_OXIDATION_USING_ACYL_COA_OXIDASE         | -1.17 | 0.55 | 0 | 0 | 0 | not significant |
| 4116 | GO_KERATINOCYTE_MIGRATION                                   | -1.17 | 0.55 | 0 | 0 | 0 | not significant |
| 4117 | GO_NEGATIVE_REGULATION_OF_RYANODINE_SENSITIVE_CALCIIUM_RELI | -1.17 | 0.55 | 0 | 0 | 0 | not significant |
| 4118 | GO_POSITIVE_REGULATION_OF_T_HELPER_CELL_DIFFERENTIATION     | -1.17 | 0.55 | 0 | 0 | 0 | not significant |
| 4119 | GO_SPERM_PRINCIPAL_PIECE                                    | -1.17 | 0.55 | 0 | 0 | 0 | not significant |
| 4120 | GO_VITAMIN_D_RECEPTOR_SIGNALING_PATHWAY                     | -1.17 | 0.55 | 0 | 0 | 0 | not significant |
| 4121 | GO_ACETYLCHOLINE_GATED_CATION_SELECTIVE_CHANNEL_ACTIVITY    | -1.17 | 0.54 | 0 | 0 | 0 | not significant |
| 4122 | REACTOME_ABC_TRANSPORTERS_IN_LIPID_HOMEOSTASIS              | -1.17 | 0.54 | 0 | 0 | 0 | not significant |
| 4123 | REACTOME_GP1B_IX_V_ACTIVATION_SIGNALING                     | -1.17 | 0.54 | 0 | 0 | 0 | not significant |
| 4124 | GO_NEGATIVE_REGULATION_OF_METANEPHROS_DEVELOPMENT           | -1.17 | 0.53 | 0 | 0 | 0 | not significant |
| 4125 | GO_REGULATION_OF_WOUND_HEALING_SPREADING_OF_EPIDERMAL_C     | -1.17 | 0.53 | 0 | 0 | 0 | not significant |
| 4126 | GO_SYNAPTIC_TRANSMISSION_DOPAMINERGIC                       | -1.17 | 0.53 | 0 | 0 | 0 | not significant |
| 4127 | GO_TETRAHYDROBIPTERIN_BIOSYNTHETIC_PROCESS                  | -1.17 | 0.53 | 0 | 0 | 0 | not significant |
| 4128 | REACTOME_ACETYLCHOLINE_BINDING_AND_DOWNSTREAM_EVENTS        | -1.17 | 0.53 | 0 | 0 | 0 | not significant |
| 4129 | CHR5Q34                                                     | -1.17 | 0.52 | 0 | 0 | 0 | not significant |
| 4130 | GO_KETONE_BODY_BIOSYNTHETIC_PROCESS                         | -1.17 | 0.52 | 0 | 0 | 0 | not significant |

|      |                                                           |       |      |   |   |   |                 |
|------|-----------------------------------------------------------|-------|------|---|---|---|-----------------|
| 4131 | GO_MODULATION_OF_MOLECULAR_FUNCTION_IN_OTHER_ORGANISM     | -1.17 | 0.52 | 0 | 0 | 0 | not significant |
| 4132 | GO_SERINE_FAMILY_AMINO_ACID_CATABOLIC_PROCESS             | -1.17 | 0.52 | 0 | 0 | 0 | not significant |
| 4133 | GO_PRE_MIRNA_BINDING                                      | -1.17 | 0.51 | 0 | 0 | 0 | not significant |
| 4134 | GO_SECONDARY_HEART_FIELD_SPECIFICATION                    | -1.17 | 0.51 | 0 | 0 | 0 | not significant |
| 4135 | GO_SERINE_TYPE_EXOPEPTIDASE_ACTIVITY                      | -1.17 | 0.51 | 0 | 0 | 0 | not significant |
| 4136 | GO_NEGATIVE_REGULATION_OF_PROTEIN_LOCALIZATION_TO_CELL_SL | -1.17 | 0.50 | 0 | 0 | 0 | not significant |
| 4137 | GO_POSITIVE_REGULATION_OF_MOLECULAR_FUNCTION              | -1.16 | 1.96 | 0 | 0 | 0 | not significant |
| 4138 | GO_INTERSPECIES_INTERACTION_BETWEEN_ORGANISMS             | -1.16 | 1.75 | 0 | 0 | 0 | not significant |
| 4139 | GO_REGULATION_OF_RESPONSE_TO_STRESS                       | -1.16 | 1.71 | 0 | 0 | 0 | not significant |
| 4140 | GO_CELL_ACTIVATION                                        | -1.16 | 1.69 | 0 | 0 | 0 | not significant |
| 4141 | GO_GROWTH                                                 | -1.16 | 1.52 | 0 | 0 | 0 | not significant |
| 4142 | GO_POSITIVE_REGULATION_OF_MULTICELLULAR_ORGANISMAL_PROCE  | -1.16 | 1.47 | 0 | 0 | 0 | not significant |
| 4143 | GO_POST_TRANSLATIONAL_PROTEIN_MODIFICATION                | -1.16 | 1.17 | 0 | 0 | 0 | not significant |
| 4144 | GO_REGULATION_OF_CYTOSKELETON_ORGANIZATION                | -1.16 | 1.15 | 0 | 0 | 0 | not significant |
| 4145 | LIM_MAMMARY_STEM_CELL_UP                                  | -1.16 | 0.99 | 0 | 0 | 0 | not significant |
| 4146 | GO_COGNITION                                              | -1.16 | 0.92 | 0 | 0 | 0 | not significant |
| 4147 | GO_ORGANIC_ACID_CATABOLIC_PROCESS                         | -1.16 | 0.88 | 0 | 0 | 0 | not significant |
| 4148 | WANG_TUMOR_INVASIVENESS_DN                                | -1.16 | 0.88 | 0 | 0 | 0 | not significant |
| 4149 | GO_PROTEIN_STABILIZATION                                  | -1.16 | 0.87 | 0 | 0 | 0 | not significant |
| 4150 | GO_RESPONSE_TO_VIRUS                                      | -1.16 | 0.87 | 0 | 0 | 0 | not significant |
| 4151 | REACTOME_TOLL_LIKE_RECEPTOR_CASCADES                      | -1.16 | 0.84 | 0 | 0 | 0 | not significant |
| 4152 | GO_REGULATION_OF_PROTEIN_LOCALIZATION_TO_MEMBRANE         | -1.16 | 0.83 | 0 | 0 | 0 | not significant |
| 4153 | GO_NUCLEOTIDE_EXCISION_REPAIR                             | -1.16 | 0.79 | 0 | 0 | 0 | not significant |
| 4154 | KEGG_CELL_CYCLE                                           | -1.16 | 0.79 | 0 | 0 | 0 | not significant |
| 4155 | MIYAGAWA_TARGETS_OF_EWSR1_ETS_FUSIONS_DN                  | -1.16 | 0.79 | 0 | 0 | 0 | not significant |
| 4156 | GO_CHROMATIN_DNA_BINDING                                  | -1.16 | 0.78 | 0 | 0 | 0 | not significant |
| 4157 | GO_RIBONUCLEASE_ACTIVITY                                  | -1.16 | 0.78 | 0 | 0 | 0 | not significant |
| 4158 | REACTOME_CHROMOSOME_MAINTENANCE                           | -1.16 | 0.77 | 0 | 0 | 0 | not significant |
| 4159 | REACTOME_SENESCENCE_ASSOCIATED_SECRETORY_PHENOTYPE_SAE    | -1.16 | 0.77 | 0 | 0 | 0 | not significant |
| 4160 | GO_CARBOHYDRATE_TRANSMEMBRANE_TRANSPORT                   | -1.16 | 0.76 | 0 | 0 | 0 | not significant |
| 4161 | GO_IMPORT_INTO_NUCLEUS                                    | -1.16 | 0.76 | 0 | 0 | 0 | not significant |
| 4162 | NGUYEN_NOTCH1_TARGETS_DN                                  | -1.16 | 0.76 | 0 | 0 | 0 | not significant |
| 4163 | BMI1_DN_MEL18_DN_V1_UP                                    | -1.16 | 0.75 | 0 | 0 | 0 | not significant |
| 4164 | GO_AMINO_ACID_TRANSPORT                                   | -1.16 | 0.75 | 0 | 0 | 0 | not significant |
| 4165 | GO_REGULATION_OF_MRNA_PROCESSING                          | -1.16 | 0.75 | 0 | 0 | 0 | not significant |
| 4166 | GO_NUCLEOBASE_CONTAINING_SMALL_MOLECULE_BIOSYNTHETIC_PRC  | -1.16 | 0.74 | 0 | 0 | 0 | not significant |
| 4167 | GO_TRANSLATION_FACTOR_ACTIVITY_RNA_BINDING                | -1.16 | 0.74 | 0 | 0 | 0 | not significant |
| 4168 | GROSS_HYPOXIA_VIA_ELK3_DN                                 | -1.16 | 0.73 | 0 | 0 | 0 | not significant |
| 4169 | DE_YY1_TARGETS_DN                                         | -1.16 | 0.72 | 0 | 0 | 0 | not significant |
| 4170 | GO_N_METHYLTRANSFERASE_ACTIVITY                           | -1.16 | 0.71 | 0 | 0 | 0 | not significant |
| 4171 | GO_CARDIAC_CHAMBER_MORPHOGENESIS                          | -1.16 | 0.69 | 0 | 0 | 0 | not significant |
| 4172 | GO_EPHRIN_RECEPTOR_SIGNALING_PATHWAY                      | -1.16 | 0.69 | 0 | 0 | 0 | not significant |
| 4173 | KAYO_CALORIE_RESTRICTION_MUSCLE_DN                        | -1.16 | 0.69 | 0 | 0 | 0 | not significant |
| 4174 | ZHANG_PROLIFERATING_VS_QUIESCENT                          | -1.16 | 0.69 | 0 | 0 | 0 | not significant |
| 4175 | BMI1_DN_V1_UP                                             | -1.16 | 0.68 | 0 | 0 | 0 | not significant |
| 4176 | DIRMEIER_LMP1_RESPONSE_LATE_UP                            | -1.16 | 0.68 | 0 | 0 | 0 | not significant |
| 4177 | GO_POSITIVE_REGULATION_OF_TRANSMEMBRANE_RECEPTOR_PROTEI   | -1.16 | 0.68 | 0 | 0 | 0 | not significant |
| 4178 | GO_PROTEIN_HOMOTETRAMERIZATION                            | -1.16 | 0.68 | 0 | 0 | 0 | not significant |
| 4179 | GO_MODIFICATION_BY_SYMBIONT_OF_HOST_MORPHOLOGY_OR_PHYSI   | -1.16 | 0.67 | 0 | 0 | 0 | not significant |
| 4180 | PID_RAC1_PATHWAY                                          | -1.16 | 0.66 | 0 | 0 | 0 | not significant |
| 4181 | GO_EXOGENOUS_PROTEIN_BINDING                              | -1.16 | 0.65 | 0 | 0 | 0 | not significant |
| 4182 | GO_HISTONE_PHOSPHORYLATION                                | -1.16 | 0.65 | 0 | 0 | 0 | not significant |
| 4183 | GO_NUCLEOTIDE_EXCISION_REPAIR_DNA_INCISION                | -1.16 | 0.65 | 0 | 0 | 0 | not significant |
| 4184 | GO_T_CELL_APOPTOTIC_PROCESS                               | -1.16 | 0.65 | 0 | 0 | 0 | not significant |
| 4185 | MARSON_FOXP3_TARGETS_UP                                   | -1.16 | 0.65 | 0 | 0 | 0 | not significant |
| 4186 | GAUSSMANN_MLL_AF4_FUSION_TARGETS_E_UP                     | -1.16 | 0.64 | 0 | 0 | 0 | not significant |
| 4187 | GO_ACIDIC_AMINO_ACID_TRANSPORT                            | -1.16 | 0.63 | 0 | 0 | 0 | not significant |
| 4188 | GUO_HEX_TARGETS_DN                                        | -1.16 | 0.63 | 0 | 0 | 0 | not significant |
| 4189 | PID_RHOA_PATHWAY                                          | -1.16 | 0.63 | 0 | 0 | 0 | not significant |
| 4190 | CHR12P12                                                  | -1.16 | 0.62 | 0 | 0 | 0 | not significant |
| 4191 | COLLIS_PRKDC_SUBSTRATES                                   | -1.16 | 0.62 | 0 | 0 | 0 | not significant |
| 4192 | WILLERT_WNT_SIGNALING                                     | -1.16 | 0.62 | 0 | 0 | 0 | not significant |
| 4193 | GO_POSITIVE_REGULATION_OF_PROTEIN_COMPLEX_DISASSEMBLY     | -1.16 | 0.61 | 0 | 0 | 0 | not significant |
| 4194 | KEGG_GLUTATHIONE_METABOLISM                               | -1.16 | 0.61 | 0 | 0 | 0 | not significant |
| 4195 | CROONQUIST_NRAS_SIGNALING_UP                              | -1.16 | 0.60 | 0 | 0 | 0 | not significant |
| 4196 | GO_CELLULAR_RESPONSE_TO_VASCULAR_ENDOTHELIAL_GROWTH_FA    | -1.16 | 0.60 | 0 | 0 | 0 | not significant |
| 4197 | GO_NEGATIVE_REGULATION_OF_VIRAL_GENOME_REPLICATION        | -1.16 | 0.60 | 0 | 0 | 0 | not significant |
| 4198 | HARRIS_BRAIN_CANCER_PROGENITORS                           | -1.16 | 0.60 | 0 | 0 | 0 | not significant |
| 4199 | STEIN_ESRRA_TARGETS_RESPONSIVE_TO_ESTROGEN_DN             | -1.16 | 0.60 | 0 | 0 | 0 | not significant |
| 4200 | BERENJENO_ROCK_SIGNALING_NOT_VIA_RHOA_UP                  | -1.16 | 0.59 | 0 | 0 | 0 | not significant |
| 4201 | GUILLAUMOND_KLF10_TARGETS_DN                              | -1.16 | 0.59 | 0 | 0 | 0 | not significant |
| 4202 | GENTILE_UV_LOW_DOSE_UP                                    | -1.16 | 0.58 | 0 | 0 | 0 | not significant |
| 4203 | GO_ANTERIOR_POSTERIOR_AXIS_SPECIFICATION                  | -1.16 | 0.58 | 0 | 0 | 0 | not significant |
| 4204 | GO_ANTIMICROBIAL_HUMORAL_IMMUNE_RESPONSE_MEDIATED_BY_ANT  | -1.16 | 0.58 | 0 | 0 | 0 | not significant |
| 4205 | REACTOME_PROTEIN_METHYLATION                              | -1.16 | 0.58 | 0 | 0 | 0 | not significant |
| 4206 | VARELA_ZMPSTE24_TARGETS_DN                                | -1.16 | 0.58 | 0 | 0 | 0 | not significant |
| 4207 | GO_ASTROCYTE_DEVELOPMENT                                  | -1.16 | 0.57 | 0 | 0 | 0 | not significant |
| 4208 | GO_HISTONE_H2A_K63_LINKED_UBIQUITINATION                  | -1.16 | 0.57 | 0 | 0 | 0 | not significant |
| 4209 | GO_RESPONSE_TO_OXYGEN_RADICAL                             | -1.16 | 0.57 | 0 | 0 | 0 | not significant |
| 4210 | BIOCARTA_RANBP2_PATHWAY                                   | -1.16 | 0.56 | 0 | 0 | 0 | not significant |
| 4211 | GO_REGULATION_OF_METANEPHROS_DEVELOPMENT                  | -1.16 | 0.56 | 0 | 0 | 0 | not significant |
| 4212 | SILIGAN_TARGETS_OF_EWS_FLI1_FUSION_DN                     | -1.16 | 0.56 | 0 | 0 | 0 | not significant |
| 4213 | DE_YY1_TARGETS_UP                                         | -1.16 | 0.55 | 0 | 0 | 0 | not significant |
| 4214 | GO_REGULATION_OF_MEMBRANE_PROTEIN_ECTODOMAIN_PROTEOLYS    | -1.16 | 0.55 | 0 | 0 | 0 | not significant |
| 4215 | RAY_TARGETS_OF_P210_BCR_ABL_FUSION_UP                     | -1.16 | 0.55 | 0 | 0 | 0 | not significant |
| 4216 | REACTOME_OAS_ANTIVIRAL_RESPONSE                           | -1.16 | 0.55 | 0 | 0 | 0 | not significant |
| 4217 | XU_HGF_TARGETS_INDUCED_BY_AKT1_6HR                        | -1.16 | 0.55 | 0 | 0 | 0 | not significant |
| 4218 | GO_POSITIVE_REGULATION_OF_LYMPHOCYTE_CHEMOTAXIS           | -1.16 | 0.54 | 0 | 0 | 0 | not significant |
| 4219 | GO_POSITIVE_REGULATION_OF_MEMBRANE_PROTEIN_ECTODOMAIN_PF  | -1.16 | 0.54 | 0 | 0 | 0 | not significant |
| 4220 | BIOCARTA_SRCPPTP_PATHWAY                                  | -1.16 | 0.53 | 0 | 0 | 0 | not significant |
| 4221 | GO_ADENOSINE_DEAMINASE_ACTIVITY                           | -1.16 | 0.53 | 0 | 0 | 0 | not significant |
| 4222 | GO_DEATH_DOMAIN_BINDING                                   | -1.16 | 0.53 | 0 | 0 | 0 | not significant |
| 4223 | GO_GERM_CELL_NUCLEUS                                      | -1.16 | 0.53 | 0 | 0 | 0 | not significant |
| 4224 | GO_LUNG_CELL_DIFFERENTIATION                              | -1.16 | 0.53 | 0 | 0 | 0 | not significant |
| 4225 | GO_MAST_CELL_MIGRATION                                    | -1.16 | 0.53 | 0 | 0 | 0 | not significant |
| 4226 | GO_L_SERINE_BIOSYNTHETIC_PROCESS                          | -1.16 | 0.52 | 0 | 0 | 0 | not significant |
| 4227 | GO_MORPHOGENESIS_OF_AN_EPITHELIAL_FOLD                    | -1.16 | 0.52 | 0 | 0 | 0 | not significant |
| 4228 | GO_OBSERVATIONAL_LEARNING                                 | -1.16 | 0.51 | 0 | 0 | 0 | not significant |
| 4229 | GO_PLATELET_DENSE_GRANULE_MEMBRANE                        | -1.16 | 0.51 | 0 | 0 | 0 | not significant |
| 4230 | GO_LSM1_7_PAT1_COMPLEX                                    | -1.16 | 0.50 | 0 | 0 | 0 | not significant |
| 4231 | GO_POSITIVE_REGULATION_OF_INTERFERON_GAMMA_BIOSYNTHETIC_F | -1.16 | 0.50 | 0 | 0 | 0 | not significant |
| 4232 | GO_TELOMERASE_ACTIVITY                                    | -1.16 | 0.50 | 0 | 0 | 0 | not significant |
| 4233 | GO_L_Glutamate_TRANSMEMBRANE_TRANSPORTER_ACTIVITY         | -1.16 | 0.49 | 0 | 0 | 0 | not significant |
| 4234 | GO_POSITIVE_REGULATION_OF_HISTONE_UBIQUITINATION          | -1.16 | 0.48 | 0 | 0 | 0 | not significant |
| 4235 | INAMURA_LUNG_CANCER_SCC_DN                                | -1.16 | 0.48 | 0 | 0 | 0 | not significant |
| 4236 | GO_CELL_CYCLE                                             | -1.15 | 4.00 | 0 | 0 | 0 | not significant |
| 4237 | GO_REGULATION_OF_CELL_CYCLE                               | -1.15 | 4.00 | 0 | 0 | 0 | not significant |
| 4238 | GO_CYTOPLASMIC_VESICLE_PART                               | -1.15 | 1.60 | 0 | 0 | 0 | not significant |
| 4239 | GO_POSITIVE_REGULATION_OF_TRANSPORT                       | -1.15 | 1.39 | 0 | 0 | 0 | not significant |



|      |                                                          |       |      |   |   |   |                 |
|------|----------------------------------------------------------|-------|------|---|---|---|-----------------|
| 4240 | GO NEGATIVE REGULATION OF CELLULAR COMPONENT ORGANIZATI  | -1.15 | 1.25 | 0 | 0 | 0 | not significant |
| 4241 | KOINUMA_TARGETS_OF_SMAD2_OR_SMAD3                        | -1.15 | 1.25 | 0 | 0 | 0 | not significant |
| 4242 | GO_ORGANOPHOSPHATE_BIOSYNTHETIC_PROCESS                  | -1.15 | 1.23 | 0 | 0 | 0 | not significant |
| 4243 | GO_REGULATION_OF_NUCLEOBASE_CONTAINING_COMPOUND_METABO   | -1.15 | 1.22 | 0 | 0 | 0 | not significant |
| 4244 | TOYOTA_TARGETS_OF_MIR34B_AND_MIR34C                      | -1.15 | 1.19 | 0 | 0 | 0 | not significant |
| 4245 | GO_MUSCLE_STRUCTURE_DEVELOPMENT                          | -1.15 | 1.18 | 0 | 0 | 0 | not significant |
| 4246 | GO_DEVELOPMENTAL_GROWTH                                  | -1.15 | 1.14 | 0 | 0 | 0 | not significant |
| 4247 | SMID_BREAST_CANCER_NORMAL_LIKE_UP                        | -1.15 | 1.05 | 0 | 0 | 0 | not significant |
| 4248 | GO_REGULATION_OF_BODY_FLUID_LEVELS                       | -1.15 | 0.95 | 0 | 0 | 0 | not significant |
| 4249 | GO_RIBONUCLEOPROTEIN_COMPLEX_SUBUNIT_ORGANIZATION        | -1.15 | 0.95 | 0 | 0 | 0 | not significant |
| 4250 | GO_RESPONSE_TO_ANTIANTIBIOTIC                            | -1.15 | 0.90 | 0 | 0 | 0 | not significant |
| 4251 | E2F1_UP_V1_UP                                            | -1.15 | 0.85 | 0 | 0 | 0 | not significant |
| 4252 | GO_REGULATION_OF_CELLULAR_PROTEIN_CATABOLIC_PROCESS      | -1.15 | 0.85 | 0 | 0 | 0 | not significant |
| 4253 | GO_OUTER_MEMBRANE                                        | -1.15 | 0.84 | 0 | 0 | 0 | not significant |
| 4254 | WANG_MLL_TARGETS                                         | -1.15 | 0.83 | 0 | 0 | 0 | not significant |
| 4255 | HALLMARK_DNA_REPAIR                                      | -1.15 | 0.81 | 0 | 0 | 0 | not significant |
| 4256 | PENG_GLUCCOSE_DEPRIVATION_DN                             | -1.15 | 0.77 | 0 | 0 | 0 | not significant |
| 4257 | ZHANG_TLX_TARGETS_DN                                     | -1.15 | 0.76 | 0 | 0 | 0 | not significant |
| 4258 | GO_REGULATION_OF_LEUKOCYTE_MIGRATION                     | -1.15 | 0.75 | 0 | 0 | 0 | not significant |
| 4259 | SAFFORD_T_LYMPHOCYTE_ANERGY                              | -1.15 | 0.72 | 0 | 0 | 0 | not significant |
| 4260 | REACTOME_RNA_POLYMERASE_I_TRANSCRIPTION_INITIATION       | -1.15 | 0.70 | 0 | 0 | 0 | not significant |
| 4261 | GO_PROTON_TRANSMEMBRANE_TRANSPORTER_ACTIVITY             | -1.15 | 0.69 | 0 | 0 | 0 | not significant |
| 4262 | HALLMARK_BILE_ACID_METABOLISM                            | -1.15 | 0.69 | 0 | 0 | 0 | not significant |
| 4263 | GO_EYE_MORPHOGENESIS                                     | -1.15 | 0.68 | 0 | 0 | 0 | not significant |
| 4264 | GO_REGULATION_OF_UBIQUITIN_PROTEIN_TRANSFERASE_ACTIVITY  | -1.15 | 0.68 | 0 | 0 | 0 | not significant |
| 4265 | REACTOME_FCGAMMA_RECEPTOR_FCGR_DEPENDENT_PHAGOCYTOSI     | -1.15 | 0.68 | 0 | 0 | 0 | not significant |
| 4266 | ROSS_ACUTE_MYELOID_LEUKEMIA_CBF                          | -1.15 | 0.68 | 0 | 0 | 0 | not significant |
| 4267 | GAVIN_FOXP3_TARGETS_CLUSTER_T4                           | -1.15 | 0.67 | 0 | 0 | 0 | not significant |
| 4268 | RICKMAN_TUMOR_DIFFERENTIATED_MODERATELY_VS_POORLY_UP     | -1.15 | 0.67 | 0 | 0 | 0 | not significant |
| 4269 | ROSS_AML_WITH_MLL_FUSIONS                                | -1.15 | 0.67 | 0 | 0 | 0 | not significant |
| 4270 | GO_LYMPHOCYTE_APOPTOTIC_PROCESS                          | -1.15 | 0.66 | 0 | 0 | 0 | not significant |
| 4271 | GO_FIBROBLAST_PROLIFERATION                              | -1.15 | 0.65 | 0 | 0 | 0 | not significant |
| 4272 | GO_IRE1_MEDIATED_UNFOLDED_PROTEIN_RESPONSE               | -1.15 | 0.65 | 0 | 0 | 0 | not significant |
| 4273 | REACTOME_INOSITOL_PHOSPHATE_METABOLISM                   | -1.15 | 0.65 | 0 | 0 | 0 | not significant |
| 4274 | REACTOME_DNA_DAMAGE_RECOGNITION_IN_GG_NER                | -1.15 | 0.62 | 0 | 0 | 0 | not significant |
| 4275 | SEITZ_NEOPLASTIC_TRANSFORMATION_BY_8P_DELETION_UP        | -1.15 | 0.62 | 0 | 0 | 0 | not significant |
| 4276 | GO_REGULATION_OF_POTASSIUM_ION_TRANSMEMBRANE_TRANSPORTI  | -1.15 | 0.61 | 0 | 0 | 0 | not significant |
| 4277 | REACTOME_SIGNALING_BY_FGFR2                              | -1.15 | 0.61 | 0 | 0 | 0 | not significant |
| 4278 | GO_CHAPERONE_COFACTOR_DEPENDENT_PROTEIN_REFOLDING        | -1.15 | 0.59 | 0 | 0 | 0 | not significant |
| 4279 | GO_MOVEMENT_IN_ENVIRONMENT_OF_OTHER_ORGANISM_INVOLVED_IN | -1.15 | 0.59 | 0 | 0 | 0 | not significant |
| 4280 | GO_OXIDOREDUCTASE_ACTIVITY_ACTING_ON_THE_ALDEHYDE_OR_OXC | -1.15 | 0.59 | 0 | 0 | 0 | not significant |
| 4281 | REACTOME_GABA_RECEPTOR_ACTIVATION                        | -1.15 | 0.59 | 0 | 0 | 0 | not significant |
| 4282 | GO_GLANDULAR_EPITHELIAL_CELL_DEVELOPMENT                 | -1.15 | 0.58 | 0 | 0 | 0 | not significant |
| 4283 | GO_QUINONE_BINDING                                       | -1.15 | 0.58 | 0 | 0 | 0 | not significant |
| 4284 | GO_RESPONSE_TO_AUDITORY_STIMULUS                         | -1.15 | 0.58 | 0 | 0 | 0 | not significant |
| 4285 | VALK_AML_WITH_FLT3_ITD                                   | -1.15 | 0.58 | 0 | 0 | 0 | not significant |
| 4286 | VANASSE_BCL2_TARGETS_DN                                  | -1.15 | 0.58 | 0 | 0 | 0 | not significant |
| 4287 | ZHU_CMV_8_HR_DN                                          | -1.15 | 0.58 | 0 | 0 | 0 | not significant |
| 4288 | BURTON_ADIPOGENESIS_PEAK_AT_2HR                          | -1.15 | 0.57 | 0 | 0 | 0 | not significant |
| 4289 | GO_NEGATIVE_REGULATION_OF_CELL_JUNCTION_ASSEMBLY         | -1.15 | 0.57 | 0 | 0 | 0 | not significant |
| 4290 | GO_NEGATIVE_REGULATION_OF_GLIOGENESIS                    | -1.15 | 0.57 | 0 | 0 | 0 | not significant |
| 4291 | GO_RESPONSE_TO_AMPHETAMINE                               | -1.15 | 0.57 | 0 | 0 | 0 | not significant |
| 4292 | TURASHVILI_BREAST_CARCINOMA_DUCTAL_VS_LOBULAR_UP         | -1.15 | 0.57 | 0 | 0 | 0 | not significant |
| 4293 | CHR2Q21                                                  | -1.15 | 0.56 | 0 | 0 | 0 | not significant |
| 4294 | GO_ANTIEN_PROCESSING_AND_PRESENTATION_OF_ENDOGENOUS_PE   | -1.15 | 0.56 | 0 | 0 | 0 | not significant |
| 4295 | GO_MELANIN_BIOSYNTHETIC_PROCESS                          | -1.15 | 0.56 | 0 | 0 | 0 | not significant |
| 4296 | GO_NEGATIVE_REGULATION_OF_DNA_BIOSYNTHETIC_PROCESS       | -1.15 | 0.56 | 0 | 0 | 0 | not significant |
| 4297 | GO_POSITIVE_REGULATION_OF_B_CELL_DIFFERENTIATION         | -1.15 | 0.56 | 0 | 0 | 0 | not significant |
| 4298 | GO_DEATH_RECEPTOR_BINDING                                | -1.15 | 0.55 | 0 | 0 | 0 | not significant |
| 4299 | GO_EXTRINSIC_COMPONENT_OF_MITOCHONDRIAL_INNER_MEMBRANE   | -1.15 | 0.55 | 0 | 0 | 0 | not significant |
| 4300 | GO_RESPONSE_TO_NICOTINE                                  | -1.15 | 0.55 | 0 | 0 | 0 | not significant |
| 4301 | GO_MITOCHONDRIAL_FRAGMENTATION_INVOLVED_IN_APOPTOTIC_PRO | -1.15 | 0.54 | 0 | 0 | 0 | not significant |
| 4302 | TERAMOTO_OPN_TARGETS_CLUSTER_6                           | -1.15 | 0.54 | 0 | 0 | 0 | not significant |
| 4303 | FIGUEROA_AML_METHYLATION_CLUSTER_5_UP                    | -1.15 | 0.54 | 0 | 0 | 0 | not significant |
| 4304 | GO_BETA_CATENIN_DESTRUCTION_COMPLEX                      | -1.15 | 0.53 | 0 | 0 | 0 | not significant |
| 4305 | GO_CELLULAR_RESPONSE_TO_INTERFERON_BETA                  | -1.15 | 0.53 | 0 | 0 | 0 | not significant |
| 4306 | GO_NADH_PYROPHOSPHATASE_ACTIVITY                         | -1.15 | 0.53 | 0 | 0 | 0 | not significant |
| 4307 | GO_PHOTORECEPTOR_CONNECTING_CILIUM                       | -1.15 | 0.53 | 0 | 0 | 0 | not significant |
| 4308 | GO_PRESPLICEOSOME                                        | -1.15 | 0.53 | 0 | 0 | 0 | not significant |
| 4309 | GO_EXTRINSIC_COMPONENT_OF_POSTSYNAPTIC_MEMBRANE          | -1.15 | 0.52 | 0 | 0 | 0 | not significant |
| 4310 | GO_NEGATIVE_REGULATION_OF_T_HELPER_CELL_DIFFERENTIATION  | -1.15 | 0.52 | 0 | 0 | 0 | not significant |
| 4311 | GO_POSITIVE_REGULATION_OF_BLOOD_PRESSURE                 | -1.15 | 0.52 | 0 | 0 | 0 | not significant |
| 4312 | PID_S1P_S1P4_PATHWAY                                     | -1.15 | 0.52 | 0 | 0 | 0 | not significant |
| 4313 | XU_HGF_TARGETS_INDUCED_BY_AKT1_48HR_UP                   | -1.15 | 0.52 | 0 | 0 | 0 | not significant |
| 4314 | GO_CELLULAR_SODIUM_ION_HOMEOSTASIS                       | -1.15 | 0.51 | 0 | 0 | 0 | not significant |
| 4315 | PHONG_TNF_TARGETS_DN                                     | -1.15 | 0.51 | 0 | 0 | 0 | not significant |
| 4316 | REACTOME_LINOLEIC_ACID_LA_METABOLISM                     | -1.15 | 0.51 | 0 | 0 | 0 | not significant |
| 4317 | FUKUSHIMA_TNFSF11_TARGETS                                | -1.15 | 0.50 | 0 | 0 | 0 | not significant |
| 4318 | GO_CHROMO_SHADOW_DOMAIN_BINDING                          | -1.15 | 0.50 | 0 | 0 | 0 | not significant |
| 4319 | GO_NEGATIVE_REGULATION_OF_MEMBRANE_POTENTIAL             | -1.15 | 0.50 | 0 | 0 | 0 | not significant |
| 4320 | GO_REGULATION_OF_TOLL_LIKE_RECEPTOR_4_SIGNALING_PATHWAY  | -1.15 | 0.50 | 0 | 0 | 0 | not significant |
| 4321 | GO_U4_SNRNA_3_END_PROCESSING                             | -1.15 | 0.50 | 0 | 0 | 0 | not significant |
| 4322 | REICHERT_G1S_REGULATORS_AS_PI3K_TARGETS                  | -1.15 | 0.50 | 0 | 0 | 0 | not significant |
| 4323 | GO_ASTROCYTE_CELL_MIGRATION                              | -1.15 | 0.49 | 0 | 0 | 0 | not significant |
| 4324 | KIM_RESPONSE_TO_TSA_AND_DECITABINE_DN                    | -1.15 | 0.49 | 0 | 0 | 0 | not significant |
| 4325 | GO_POSITIVE_REGULATION_OF_PROTEIN_MONOUBIQUITINATION     | -1.15 | 0.48 | 0 | 0 | 0 | not significant |
| 4326 | GO_PURINE_NUCLEOSIDE_DIPHOSPHATE_BIOSYNTHETIC_PROCESS    | -1.15 | 0.48 | 0 | 0 | 0 | not significant |
| 4327 | GO_REGULATION_OF_CATECHOLAMINE_METABOLIC_PROCESS         | -1.15 | 0.48 | 0 | 0 | 0 | not significant |
| 4328 | GO_REGULATION_OF_PEPTIDYL_CYSSTEINE_S_NITROSYLATION      | -1.15 | 0.48 | 0 | 0 | 0 | not significant |
| 4329 | REACTOME_INTERLEUKIN_1_PROCESSING                        | -1.15 | 0.48 | 0 | 0 | 0 | not significant |
| 4330 | GO_INTERFERON_GAMMA_BIOSYNTHETIC_PROCESS                 | -1.15 | 0.47 | 0 | 0 | 0 | not significant |
| 4331 | BENPORATH_NANOG_TARGETS                                  | -1.14 | 1.72 | 0 | 0 | 0 | not significant |
| 4332 | GO_CELL_MOTILITY                                         | -1.14 | 1.72 | 0 | 0 | 0 | not significant |
| 4333 | GO_ORGANIC_CYCLIC_COMPOUND_CATABOLIC_PROCESS             | -1.14 | 1.17 | 0 | 0 | 0 | not significant |
| 4334 | REACTOME_DNA_REPAIR                                      | -1.14 | 1.13 | 0 | 0 | 0 | not significant |
| 4335 | PHONG_TNF_RESPONSE_NOT_VIA_P38                           | -1.14 | 1.10 | 0 | 0 | 0 | not significant |
| 4336 | GO_RESPONSE_TO_INORGANIC_SUBSTANCE                       | -1.14 | 1.04 | 0 | 0 | 0 | not significant |
| 4337 | GRYDER_PAX3FOXO1_ENHANCERS_KO_DOWN                       | -1.14 | 1.00 | 0 | 0 | 0 | not significant |
| 4338 | GO_REGULATION_OF_HEMOPOIESIS                             | -1.14 | 0.94 | 0 | 0 | 0 | not significant |
| 4339 | GO_SIDE_OF_MEMBRANE                                      | -1.14 | 0.93 | 0 | 0 | 0 | not significant |
| 4340 | GO_MACROMOLECULE_METHYLATION                             | -1.14 | 0.92 | 0 | 0 | 0 | not significant |
| 4341 | GO_REGULATION_OF_ACTIN_FILAMENT_BASED_PROCESS            | -1.14 | 0.92 | 0 | 0 | 0 | not significant |
| 4342 | SENGUPTA_NASOPHARYNGEAL_CARCINOMA_WITH_LMP1_UP           | -1.14 | 0.91 | 0 | 0 | 0 | not significant |
| 4343 | CHARAFE_BREAST_CANCER_LUMINAL_VS_BASAL_DN                | -1.14 | 0.89 | 0 | 0 | 0 | not significant |
| 4344 | GO_POSITIVE_REGULATION_OF_CELL_ACTIVATION                | -1.14 | 0.86 | 0 | 0 | 0 | not significant |
| 4345 | GO_AGING                                                 | -1.14 | 0.83 | 0 | 0 | 0 | not significant |
| 4346 | OSWALD_HEMATOPOIETIC_STEM_CELL_IN_COLLAGEN_GEL_UP        | -1.14 | 0.82 | 0 | 0 | 0 | not significant |
| 4347 | SRC_UP_V1_UP                                             | -1.14 | 0.77 | 0 | 0 | 0 | not significant |
| 4348 | GO_RECEPTOR_MEDIATED_ENDOCYTOSIS                         | -1.14 | 0.76 | 0 | 0 | 0 | not significant |

|      |                                                             |       |      |   |   |   |                 |
|------|-------------------------------------------------------------|-------|------|---|---|---|-----------------|
| 4349 | GO_REGULATION_OF_DEPHOSPHORYLATION                          | -1.14 | 0.74 | 0 | 0 | 0 | not significant |
| 4350 | GO_POSITIVE_REGULATION_OF_LEUKOCYTE_DIFFERENTIATION         | -1.14 | 0.73 | 0 | 0 | 0 | not significant |
| 4351 | LL_AMPLIFIED_IN_LUNG_CANCER                                 | -1.14 | 0.73 | 0 | 0 | 0 | not significant |
| 4352 | WANAGA_CARCIINOGENESIS_BY_KRAS_PTEN_UP                      | -1.14 | 0.72 | 0 | 0 | 0 | not significant |
| 4353 | KEGG_PYRIMIDINE_METABOLISM                                  | -1.14 | 0.70 | 0 | 0 | 0 | not significant |
| 4354 | TSAL_RESPONSE_TO_IONIZING_RADIATION                         | -1.14 | 0.70 | 0 | 0 | 0 | not significant |
| 4355 | CROONQUIST_NRAS_VS_STROMAL_STIMULATION_DN                   | -1.14 | 0.69 | 0 | 0 | 0 | not significant |
| 4356 | GO_MRNA_3_UTR_BINDING                                       | -1.14 | 0.69 | 0 | 0 | 0 | not significant |
| 4357 | GO_VITAMIN_METABOLIC_PROCESS                                | -1.14 | 0.69 | 0 | 0 | 0 | not significant |
| 4358 | WATANABE_RECTAL_CANCER_RADIO_THERAPY_RESPONSE_UP            | -1.14 | 0.69 | 0 | 0 | 0 | not significant |
| 4359 | GO_NEGATIVE_REGULATION_OF_EPITHELIAL_CELL_PROLIFERATION     | -1.14 | 0.66 | 0 | 0 | 0 | not significant |
| 4360 | GO_CARDIAC_CHAMBER_DEVELOPMENT                              | -1.14 | 0.65 | 0 | 0 | 0 | not significant |
| 4361 | REACTOME_PI_METABOLISM                                      | -1.14 | 0.65 | 0 | 0 | 0 | not significant |
| 4362 | GO_ACTIN_MEDIATED_CELL_CONTRACTION                          | -1.14 | 0.64 | 0 | 0 | 0 | not significant |
| 4363 | GO_NEGATIVE_REGULATION_OF_MAP_KINASE_ACTIVITY               | -1.14 | 0.64 | 0 | 0 | 0 | not significant |
| 4364 | GO_POSITIVE_REGULATION_OF_INFLAMMATORY_RESPONSE             | -1.14 | 0.64 | 0 | 0 | 0 | not significant |
| 4365 | LEE_NEURAL_CREST_STEM_CELL_DN                               | -1.14 | 0.64 | 0 | 0 | 0 | not significant |
| 4366 | REACTOME_TRANSCRIPTIONAL_REGULATION_OF_WHITE_ADIPOCYTE_D    | -1.14 | 0.64 | 0 | 0 | 0 | not significant |
| 4367 | BIOCARTA_HVNEF_PATHWAY                                      | -1.14 | 0.63 | 0 | 0 | 0 | not significant |
| 4368 | GO_ACTIN_FILAMENT_BASED_MOVEMENT                            | -1.14 | 0.63 | 0 | 0 | 0 | not significant |
| 4369 | PID_CASPASE_PATHWAY                                         | -1.14 | 0.63 | 0 | 0 | 0 | not significant |
| 4370 | PTEN_DN_V2_UP                                               | -1.14 | 0.63 | 0 | 0 | 0 | not significant |
| 4371 | GO_POSITIVE_REGULATION_OF_CYTOKINE_BIOSYNTHETIC_PROCESS     | -1.14 | 0.62 | 0 | 0 | 0 | not significant |
| 4372 | GO_PROTEIN_TRANSPORT_ALONG_MICROTUBULE                      | -1.14 | 0.62 | 0 | 0 | 0 | not significant |
| 4373 | GUTIERREZ_CHRONIC_LYMPHOCTIC_LEUKEMIA_DN                    | -1.14 | 0.62 | 0 | 0 | 0 | not significant |
| 4374 | NEMETH_INFLAMMATORY_RESPONSE_LPS_UP                         | -1.14 | 0.62 | 0 | 0 | 0 | not significant |
| 4375 | FONTAINE_PAPILLARY_THYROID_CARCINOMA_UP                     | -1.14 | 0.61 | 0 | 0 | 0 | not significant |
| 4376 | GO_T_CELL_MEDIATED_CYTOTOXICITY                             | -1.14 | 0.61 | 0 | 0 | 0 | not significant |
| 4377 | GO_VISUAL_BEHAVIOR                                          | -1.14 | 0.61 | 0 | 0 | 0 | not significant |
| 4378 | BROWNE_HCMV_INFECTION_2HR_DN                                | -1.14 | 0.60 | 0 | 0 | 0 | not significant |
| 4379 | GO_REGULATION_OF_BEHAVIOR                                   | -1.14 | 0.60 | 0 | 0 | 0 | not significant |
| 4380 | GO_REGULATION_OF_HEART_GROWTH                               | -1.14 | 0.60 | 0 | 0 | 0 | not significant |
| 4381 | GO_REGULATION_OF_LIPID_STORAGE                              | -1.14 | 0.60 | 0 | 0 | 0 | not significant |
| 4382 | GO_DICARBOXYLIC_ACID_METABOLIC_PROCESS                      | -1.14 | 0.59 | 0 | 0 | 0 | not significant |
| 4383 | GO_MHC_PROTEIN_BINDING                                      | -1.14 | 0.59 | 0 | 0 | 0 | not significant |
| 4384 | REACTOME_PERK_REGULATES_GENE_EXPRESSION                     | -1.14 | 0.59 | 0 | 0 | 0 | not significant |
| 4385 | GO_DOPAMINE_RECEPTOR_SIGNALING_PATHWAY                      | -1.14 | 0.58 | 0 | 0 | 0 | not significant |
| 4386 | GO_L_AMINO_ACID_TRANSMEMBRANE_TRANSPORTER_ACTIVITY          | -1.14 | 0.58 | 0 | 0 | 0 | not significant |
| 4387 | GO_REGULATION_OF_LAMELLIPODIUM_ASSEMBLY                     | -1.14 | 0.58 | 0 | 0 | 0 | not significant |
| 4388 | BIOCARTA_TNFR1_PATHWAY                                      | -1.14 | 0.57 | 0 | 0 | 0 | not significant |
| 4389 | BRACHAT_RESPONSE_TO_METHOTREXATE_DN                         | -1.14 | 0.57 | 0 | 0 | 0 | not significant |
| 4390 | GO_PROTEIN_LOCALIZATION_TO_CHROMATIN                        | -1.14 | 0.57 | 0 | 0 | 0 | not significant |
| 4391 | GO_REGULATION_OF_MONONUCLEAR_CELL_MIGRATION                 | -1.14 | 0.57 | 0 | 0 | 0 | not significant |
| 4392 | CHR17Q22                                                    | -1.14 | 0.56 | 0 | 0 | 0 | not significant |
| 4393 | HUANG_FOXA2_TARGETS_DN                                      | -1.14 | 0.56 | 0 | 0 | 0 | not significant |
| 4394 | YAO_TEMPORAL_RESPONSE_TO_PROGESTERONE_CLUSTER_15            | -1.14 | 0.56 | 0 | 0 | 0 | not significant |
| 4395 | CHR4Q25                                                     | -1.14 | 0.55 | 0 | 0 | 0 | not significant |
| 4396 | GO_INTERCALATED_DISC                                        | -1.14 | 0.55 | 0 | 0 | 0 | not significant |
| 4397 | GO_NEUROMUSCULAR_PROCESS_CONTROLLING_POSTURE                | -1.14 | 0.55 | 0 | 0 | 0 | not significant |
| 4398 | GO_REGULATION_OF_MRNA_3_END_PROCESSING                      | -1.14 | 0.55 | 0 | 0 | 0 | not significant |
| 4399 | KEGG_TYPE_1_DIABETES_MELLITUS                               | -1.14 | 0.55 | 0 | 0 | 0 | not significant |
| 4400 | LEE_LIVER_CANCER_MYC_TGFA_DN                                | -1.14 | 0.55 | 0 | 0 | 0 | not significant |
| 4401 | PID_NECTIN_PATHWAY                                          | -1.14 | 0.55 | 0 | 0 | 0 | not significant |
| 4402 | TIMOFEEVA_GROWTH_STRESS_VIA_STAT1_DN                        | -1.14 | 0.55 | 0 | 0 | 0 | not significant |
| 4403 | BIOCARTA_CDK5_PATHWAY                                       | -1.14 | 0.54 | 0 | 0 | 0 | not significant |
| 4404 | GO_PLASMA_MEMBRANE_TUBULATION                               | -1.14 | 0.54 | 0 | 0 | 0 | not significant |
| 4405 | GO_NEURON_PROJECTION_MEMBRANE                               | -1.14 | 0.53 | 0 | 0 | 0 | not significant |
| 4406 | GO_O_METHYLTRANSFERASE_ACTIVITY                             | -1.14 | 0.53 | 0 | 0 | 0 | not significant |
| 4407 | KEGG_STEROID_BIOSYNTHESIS                                   | -1.14 | 0.53 | 0 | 0 | 0 | not significant |
| 4408 | MIKKELSEN_MEF_ICP_WITH_H3K4ME3_AND_H3K27ME3                 | -1.14 | 0.53 | 0 | 0 | 0 | not significant |
| 4409 | PID_HIF1A_PATHWAY                                           | -1.14 | 0.53 | 0 | 0 | 0 | not significant |
| 4410 | REACTOME_DISEASES_ASSOCIATED_WITH_GLYCOSYLATION_PRECURS     | -1.14 | 0.53 | 0 | 0 | 0 | not significant |
| 4411 | RICKMAN_TUMOR_DIFFERENTIATED_MODERATELY_VS_POORLY_DN        | -1.14 | 0.53 | 0 | 0 | 0 | not significant |
| 4412 | GO_CALCIIUM_MEDIATED_SIGNALING_USING_INTRACELLULAR_CALCIIUM | -1.14 | 0.52 | 0 | 0 | 0 | not significant |
| 4413 | GO_N_TERMINAL_PEPTIDYL_METHIONINE_ACETYLATION               | -1.14 | 0.52 | 0 | 0 | 0 | not significant |
| 4414 | GO_POSITIVE_REGULATION_OF_CARDIAC_MUSCLE_CELL_PROLIFERATI   | -1.14 | 0.52 | 0 | 0 | 0 | not significant |
| 4415 | KEGG_RIBOFLAVIN_METABOLISM                                  | -1.14 | 0.52 | 0 | 0 | 0 | not significant |
| 4416 | REACTOME_ENOS_ACTIVATION                                    | -1.14 | 0.52 | 0 | 0 | 0 | not significant |
| 4417 | SESTO_RESPONSE_TO_UV_C3                                     | -1.14 | 0.52 | 0 | 0 | 0 | not significant |
| 4418 | GO_CHEMOKINE_SECRETION                                      | -1.14 | 0.51 | 0 | 0 | 0 | not significant |
| 4419 | GO_NEURAL_CREST_FORMATION                                   | -1.14 | 0.51 | 0 | 0 | 0 | not significant |
| 4420 | GO_PHOSPHATIDYLETHANOLAMINE_BIOSYNTHETIC_PROCESS            | -1.14 | 0.51 | 0 | 0 | 0 | not significant |
| 4421 | GO_FATTY_ACID_BETA_OXIDATION_USING_ACYL_COA_DEHYDROGENASE   | -1.14 | 0.50 | 0 | 0 | 0 | not significant |
| 4422 | GO_FRUCTOSE_6_PHOSPHATE_METABOLIC_PROCESS                   | -1.14 | 0.50 | 0 | 0 | 0 | not significant |
| 4423 | GO_MOTOR_NEURON_APOPTOTIC_PROCESS                           | -1.14 | 0.50 | 0 | 0 | 0 | not significant |
| 4424 | GO_REGULATION_OF_CYCLIC_NUCLEOTIDE_PHOSPHODIESTERASE_ACT    | -1.14 | 0.50 | 0 | 0 | 0 | not significant |
| 4425 | GO_REGULATION_OF_RECEPTOR_CLUSTERING                        | -1.14 | 0.50 | 0 | 0 | 0 | not significant |
| 4426 | REACTOME_REGULATION_OF_GENE_EXPRESSION_BY_HYPOXIA_INDUCIE   | -1.14 | 0.50 | 0 | 0 | 0 | not significant |
| 4427 | GO_GLOMERULAR_EPITHELIUM_DEVELOPMENT                        | -1.14 | 0.49 | 0 | 0 | 0 | not significant |
| 4428 | GO_NEGATIVE_REGULATION_OF_LEUKOCYTE_DEGRANULATION           | -1.14 | 0.49 | 0 | 0 | 0 | not significant |
| 4429 | GO_NEGATIVE_REGULATION_OF_RETINOIC_ACID_RECEPTOR_SIGNALIN   | -1.14 | 0.49 | 0 | 0 | 0 | not significant |
| 4430 | GO_POSITIVE_REGULATION_OF_NEURON_MIGRATION                  | -1.14 | 0.49 | 0 | 0 | 0 | not significant |
| 4431 | GO_RESPONSE_TO_NITROSATIVE_STRESS                           | -1.14 | 0.49 | 0 | 0 | 0 | not significant |
| 4432 | GO_RNA_DIRECTED_DNA_POLYMERASE_ACTIVITY                     | -1.14 | 0.49 | 0 | 0 | 0 | not significant |
| 4433 | BIOCARTA_DSP_PATHWAY                                        | -1.14 | 0.48 | 0 | 0 | 0 | not significant |
| 4434 | TAGHAVI_NEOPLASTIC_TRANSFORMATION                           | -1.14 | 0.48 | 0 | 0 | 0 | not significant |
| 4435 | GO_NUCLEAR_RETENTION_OF_PRE_MRNA_AT_THE_SITE_OF_TRANSCR     | -1.14 | 0.46 | 0 | 0 | 0 | not significant |
| 4436 | GO_REGULATION_OF_GOLGI_TO_PLASMA_MEMBRANE_PROTEIN_TRAN      | -1.14 | 0.44 | 0 | 0 | 0 | not significant |
| 4437 | GO_HYDROXYMETHYL_FORMYL_AND_RELATED_TRANSFERASE_ACTIV       | -1.14 | 0.43 | 0 | 0 | 0 | not significant |
| 4438 | GO_POSITIVE_REGULATION_OF_PROTEIN_METABOLIC_PROCESS         | -1.13 | 1.94 | 0 | 0 | 0 | not significant |
| 4439 | GO_PROTEOLYSIS                                              | -1.13 | 1.70 | 0 | 0 | 0 | not significant |
| 4440 | GO_REGULATION_OF_TRANSPORT                                  | -1.13 | 1.28 | 0 | 0 | 0 | not significant |
| 4441 | GO_BIOLOGICAL_ADHESION                                      | -1.13 | 1.25 | 0 | 0 | 0 | not significant |
| 4442 | GO_ORGANELLE_LOCALIZATION                                   | -1.13 | 0.99 | 0 | 0 | 0 | not significant |
| 4443 | GO_CELLULAR_RESPONSE_TO_NITROGEN_COMPOUND                   | -1.13 | 0.98 | 0 | 0 | 0 | not significant |
| 4444 | GO_REGULATION_OF_PROTEIN_CATABOLIC_PROCESS                  | -1.13 | 0.94 | 0 | 0 | 0 | not significant |
| 4445 | GRAESSMANN_APOPTOSIS_BY_SERUM_DEPRIVATION_UP                | -1.13 | 0.92 | 0 | 0 | 0 | not significant |
| 4446 | GO_MYELOID_CELL_DIFFERENTIATION                             | -1.13 | 0.90 | 0 | 0 | 0 | not significant |
| 4447 | GO_VESICLE_ORGANIZATION                                     | -1.13 | 0.84 | 0 | 0 | 0 | not significant |
| 4448 | GO_NUCLEIC_ACID_PHOSPHODIESTER_BOND_HYDROLYSIS              | -1.13 | 0.83 | 0 | 0 | 0 | not significant |
| 4449 | VANOEVLEN_MYOGENESIS_SIN3A_TARGETS                          | -1.13 | 0.79 | 0 | 0 | 0 | not significant |
| 4450 | GO_CARBOHYDRATE_BINDING                                     | -1.13 | 0.77 | 0 | 0 | 0 | not significant |
| 4451 | GO_NEGATIVE_REGULATION_OF_CELL_ADHESION                     | -1.13 | 0.77 | 0 | 0 | 0 | not significant |
| 4452 | YAGI_AML_FAB_MARKERS                                        | -1.13 | 0.77 | 0 | 0 | 0 | not significant |
| 4453 | GO_CELL_CELL_JUNCTION                                       | -1.13 | 0.74 | 0 | 0 | 0 | not significant |
| 4454 | GO_PHAGOCYTIIC_VESICLE                                      | -1.13 | 0.73 | 0 | 0 | 0 | not significant |
| 4455 | STK33_SKM_DN                                                | -1.13 | 0.73 | 0 | 0 | 0 | not significant |
| 4456 | RIZKI_TUMOR_INVASIVENESS_3D_DN                              | -1.13 | 0.72 | 0 | 0 | 0 | not significant |
| 4457 | GO_REGULATION_OF_CIRCADIAN_RHYTHM                           | -1.13 | 0.68 | 0 | 0 | 0 | not significant |

|      |                                                           |       |      |   |   |   |                 |
|------|-----------------------------------------------------------|-------|------|---|---|---|-----------------|
| 4458 | SCHLOSSER_SERUM_RESPONSE_AUGMENTED_BY_MYC                 | -1.13 | 0.68 | 0 | 0 | 0 | not significant |
| 4459 | GO_LEUKOCYTE_MEDIATED_CYTOTOXICITY                        | -1.13 | 0.67 | 0 | 0 | 0 | not significant |
| 4460 | GO_HEART_MORPHOGENESIS                                    | -1.13 | 0.66 | 0 | 0 | 0 | not significant |
| 4461 | GO_P_BODY                                                 | -1.13 | 0.66 | 0 | 0 | 0 | not significant |
| 4462 | REACTOME_TOLL_LIKE_RECEPTOR_9_TLR9_CASCADE                | -1.13 | 0.66 | 0 | 0 | 0 | not significant |
| 4463 | GO_INOSITOL_PHOSPHATE_METABOLIC_PROCESS                   | -1.13 | 0.65 | 0 | 0 | 0 | not significant |
| 4464 | REACTOME_PROCESSING_OF_DNA_DOUBLE_STRAND_BREAK_ENDS       | -1.13 | 0.65 | 0 | 0 | 0 | not significant |
| 4465 | MEL18_DN.V1_UP                                            | -1.13 | 0.64 | 0 | 0 | 0 | not significant |
| 4466 | HUANG_DASATINIB_RESISTANCE_DN                             | -1.13 | 0.63 | 0 | 0 | 0 | not significant |
| 4467 | FAELT_B_CLL_WITH_VH_REARRANGEMENTS_DN                     | -1.13 | 0.62 | 0 | 0 | 0 | not significant |
| 4468 | GO_MEMORY                                                 | -1.13 | 0.62 | 0 | 0 | 0 | not significant |
| 4469 | MULLIGHAN_NPM1_MUTATED_SIGNATURE_2_DN                     | -1.13 | 0.62 | 0 | 0 | 0 | not significant |
| 4470 | PID_TGFBR_PATHWAY                                         | -1.13 | 0.62 | 0 | 0 | 0 | not significant |
| 4471 | GO_MICROVILLUS                                            | -1.13 | 0.61 | 0 | 0 | 0 | not significant |
| 4472 | HUMMEL_BURKITT'S_LYMPHOMA_UP                              | -1.13 | 0.61 | 0 | 0 | 0 | not significant |
| 4473 | GO_ASSOCIATIVE_LEARNING                                   | -1.13 | 0.60 | 0 | 0 | 0 | not significant |
| 4474 | GO_INTERFERON_GAMMA_MEDIATED_SIGNALING_PATHWAY            | -1.13 | 0.60 | 0 | 0 | 0 | not significant |
| 4475 | REACTOME_SIGNALING_BY_FGFR                                | -1.13 | 0.60 | 0 | 0 | 0 | not significant |
| 4476 | GO_ATTACHMENT_OF_SPINDLE_MICROTUBULES_TO_KINETOCHORE      | -1.13 | 0.59 | 0 | 0 | 0 | not significant |
| 4477 | GO_GLYCOSYL_COMPOUND_METABOLIC_PROCESS                    | -1.13 | 0.59 | 0 | 0 | 0 | not significant |
| 4478 | GO_PROTEIN_LOCALIZATION_TO_GOLGI_APPARATUS                | -1.13 | 0.59 | 0 | 0 | 0 | not significant |
| 4479 | GO_REGULATION_OF_ATPASE_ACTIVITY                          | -1.13 | 0.59 | 0 | 0 | 0 | not significant |
| 4480 | ROSS_AML_WITH_AML1_ETO_FUSION                             | -1.13 | 0.59 | 0 | 0 | 0 | not significant |
| 4481 | GO_BODY_FLUID_SECRETION                                   | -1.13 | 0.58 | 0 | 0 | 0 | not significant |
| 4482 | GO_CENTROMERE_COMPLEX_ASSEMBLY                            | -1.13 | 0.58 | 0 | 0 | 0 | not significant |
| 4483 | REACTOME_SIRT1_NEGATIVELY_REGULATES_RRNA_EXPRESSION       | -1.13 | 0.58 | 0 | 0 | 0 | not significant |
| 4484 | CAFFAREL_RESPONSE_TO_THC_24HR_5_UP                        | -1.13 | 0.56 | 0 | 0 | 0 | not significant |
| 4485 | STEARMAN_LUNG_CANCER_EARLY_VS_LATE_DN                     | -1.13 | 0.56 | 0 | 0 | 0 | not significant |
| 4486 | VARELA_ZMPSTE24_TARGETS_UP                                | -1.13 | 0.56 | 0 | 0 | 0 | not significant |
| 4487 | BURTON_ADIPOGENESIS_10                                    | -1.13 | 0.55 | 0 | 0 | 0 | not significant |
| 4488 | GO_GUANOSINE_CONTAINING_COMPOUND_METABOLIC_PROCESS        | -1.13 | 0.55 | 0 | 0 | 0 | not significant |
| 4489 | GO_LUNG_ALVEOLUS_DEVELOPMENT                              | -1.13 | 0.55 | 0 | 0 | 0 | not significant |
| 4490 | PID_ATR_PATHWAY                                           | -1.13 | 0.55 | 0 | 0 | 0 | not significant |
| 4491 | REACTOME_GLUCAGON_TYPE_LIGAND_RECEPTORS                   | -1.13 | 0.55 | 0 | 0 | 0 | not significant |
| 4492 | YAO_TEMPORAL_RESPONSE_TO_PROGESTERONE_CLUSTER_8           | -1.13 | 0.55 | 0 | 0 | 0 | not significant |
| 4493 | BIOCARTA_SET_PATHWAY                                      | -1.13 | 0.54 | 0 | 0 | 0 | not significant |
| 4494 | GO_ANIMAL_ORGAN_FORMATION                                 | -1.13 | 0.54 | 0 | 0 | 0 | not significant |
| 4495 | GO_BONE_CELL_DEVELOPMENT                                  | -1.13 | 0.54 | 0 | 0 | 0 | not significant |
| 4496 | GO_NEGATIVE_REGULATION_OF_REGULATED_SECRETORY_PATHWAY     | -1.13 | 0.54 | 0 | 0 | 0 | not significant |
| 4497 | GO_POTASSIUM_CHANNEL_REGULATOR_ACTIVITY                   | -1.13 | 0.54 | 0 | 0 | 0 | not significant |
| 4498 | GO_REGULATION_OF_NUCLEASE_ACTIVITY                        | -1.13 | 0.54 | 0 | 0 | 0 | not significant |
| 4499 | RUAN_RESPONSE_TO_TNF_TROGLITAZONE_DN                      | -1.13 | 0.54 | 0 | 0 | 0 | not significant |
| 4500 | XU_RESPONSE_TO_TRETINOIN_AND_NSC682994_UP                 | -1.13 | 0.54 | 0 | 0 | 0 | not significant |
| 4501 | YE_METASTATIC_LIVER_CANCER                                | -1.13 | 0.54 | 0 | 0 | 0 | not significant |
| 4502 | CHR2P14                                                   | -1.13 | 0.53 | 0 | 0 | 0 | not significant |
| 4503 | GO_BRANCHING_INVOLVED_IN_MAMMARY_GLAND_DUCT_MORPHOGENE    | -1.13 | 0.53 | 0 | 0 | 0 | not significant |
| 4504 | GO_RESPIRATORY_BURST                                      | -1.13 | 0.53 | 0 | 0 | 0 | not significant |
| 4505 | ROZANOV_MMP14_TARGETS_SUBSET                              | -1.13 | 0.53 | 0 | 0 | 0 | not significant |
| 4506 | AZARE_STAT3_TARGETS                                       | -1.13 | 0.52 | 0 | 0 | 0 | not significant |
| 4507 | CHR2P15                                                   | -1.13 | 0.52 | 0 | 0 | 0 | not significant |
| 4508 | GO_RECEPTOR_BIOSYNTHETIC_PROCESS                          | -1.13 | 0.52 | 0 | 0 | 0 | not significant |
| 4509 | REACTOME_SYNTHESIS_OF_PIP3_AT_THE_EARLY_ENDOSOME_MEMBR    | -1.13 | 0.52 | 0 | 0 | 0 | not significant |
| 4510 | YANG_BREAST_CANCER_ESR1_UP                                | -1.13 | 0.52 | 0 | 0 | 0 | not significant |
| 4511 | CHRXQ21                                                   | -1.13 | 0.51 | 0 | 0 | 0 | not significant |
| 4512 | GO_IMMUNOGLOBULIN_SECRETION                               | -1.13 | 0.51 | 0 | 0 | 0 | not significant |
| 4513 | GO_PALMITOYL_COA_HYDROLASE_ACTIVITY                       | -1.13 | 0.51 | 0 | 0 | 0 | not significant |
| 4514 | GO_REGULATION_OF_INCLUSION_BODY_ASSEMBLY                  | -1.13 | 0.51 | 0 | 0 | 0 | not significant |
| 4515 | GO_REGULATION_OF_THE_FORCE_OF_HEART_CONTRACTION           | -1.13 | 0.51 | 0 | 0 | 0 | not significant |
| 4516 | GO_FATTY_ACID_DERIVATIVE_TRANSPORT                        | -1.13 | 0.50 | 0 | 0 | 0 | not significant |
| 4517 | GO_NEGATIVE_REGULATION_OF_CENTRIOLE_REPLICATION           | -1.13 | 0.50 | 0 | 0 | 0 | not significant |
| 4518 | LIU_VAV3_PROSTATE_CARCINOGENESIS_DN                       | -1.13 | 0.50 | 0 | 0 | 0 | not significant |
| 4519 | PID_ARF_3PATHWAY                                          | -1.13 | 0.50 | 0 | 0 | 0 | not significant |
| 4520 | REACTOME_G_BETA_GAMMA_SIGNALING_THROUGH_P13KGAMMA         | -1.13 | 0.50 | 0 | 0 | 0 | not significant |
| 4521 | GO_CYCLIN_DEPENDENT_PROTEIN_SERINE_THREONINE_KINASE_ACTIV | -1.13 | 0.49 | 0 | 0 | 0 | not significant |
| 4522 | KYNG_ENVIRONMENTAL_STRESS_RESPONSE_NOT_BY_UV_IN_WS        | -1.13 | 0.49 | 0 | 0 | 0 | not significant |
| 4523 | REACTOME_DARPP_32_EVENTS                                  | -1.13 | 0.49 | 0 | 0 | 0 | not significant |
| 4524 | GO_ADENOSINE_TO_INOSINE_EDITING                           | -1.13 | 0.48 | 0 | 0 | 0 | not significant |
| 4525 | GO_BILE_ACID_AND_BILE_SALT_TRANSPORT                      | -1.13 | 0.48 | 0 | 0 | 0 | not significant |
| 4526 | GO_CELLULAR_KETONE_BODY_METABOLIC_PROCESS                 | -1.13 | 0.48 | 0 | 0 | 0 | not significant |
| 4527 | GO_NEGATIVE_REGULATION_OF_INTERLEUKIN_8_PRODUCTION        | -1.13 | 0.48 | 0 | 0 | 0 | not significant |
| 4528 | GO_REGULATION_OF_KERATINOCYTE_MIGRATION                   | -1.13 | 0.48 | 0 | 0 | 0 | not significant |
| 4529 | BIOCARTA_MALATEX_PATHWAY                                  | -1.13 | 0.47 | 0 | 0 | 0 | not significant |
| 4530 | GO_AXONEMAL_DYNEIN_COMPLEX                                | -1.13 | 0.47 | 0 | 0 | 0 | not significant |
| 4531 | GO_NEGATIVE_REGULATION_OF_NUCLEASE_ACTIVITY               | -1.13 | 0.47 | 0 | 0 | 0 | not significant |
| 4532 | GO_REGULATION_OF_DNA_TOPOISOMERASE_ATP_HYDROLYZING_ACTI   | -1.13 | 0.47 | 0 | 0 | 0 | not significant |
| 4533 | MEINHOLD_OVARIAN_CANCER_LOW_GRADE_UP                      | -1.13 | 0.47 | 0 | 0 | 0 | not significant |
| 4534 | GO_RRNA_ADENINE_METHYLTRANSFERASE_ACTIVITY                | -1.13 | 0.46 | 0 | 0 | 0 | not significant |
| 4535 | GO_RESPONSE_TO_VITAMIN_E                                  | -1.13 | 0.45 | 0 | 0 | 0 | not significant |
| 4536 | REACTOME_SYNTHESIS_OF_DOLICHYL_PHOSPHATE                  | -1.13 | 0.45 | 0 | 0 | 0 | not significant |
| 4537 | GO_MALE_GENITALIA_DEVELOPMENT                             | -1.13 | 0.44 | 0 | 0 | 0 | not significant |
| 4538 | GO_NEGATIVE_REGULATION_OF_VESICLE_FUSION                  | -1.13 | 0.42 | 0 | 0 | 0 | not significant |
| 4539 | GO_REGULATION_OF_ORGANELLE_ORGANIZATION                   | -1.12 | 1.49 | 0 | 0 | 0 | not significant |
| 4540 | NUYTEN_EZH2_TARGETS_UP                                    | -1.12 | 1.24 | 0 | 0 | 0 | not significant |
| 4541 | GO_POSITIVE_REGULATION_OF_HYDROLASE_ACTIVITY              | -1.12 | 1.22 | 0 | 0 | 0 | not significant |
| 4542 | REACTOME_METABOLISM_OF_LIPIDS                             | -1.12 | 1.21 | 0 | 0 | 0 | not significant |
| 4543 | REACTOME_VESICLE_MEDIATED_TRANSPORT                       | -1.12 | 1.07 | 0 | 0 | 0 | not significant |
| 4544 | GO_NEGATIVE_REGULATION_OF_CELL_CYCLE                      | -1.12 | 1.06 | 0 | 0 | 0 | not significant |
| 4545 | GO_PERINUCLEAR_REGION_OF_CYTOPLASM                        | -1.12 | 1.02 | 0 | 0 | 0 | not significant |
| 4546 | MASSARWEH_TAMOXIFEN_RESISTANCE_UP                         | -1.12 | 0.95 | 0 | 0 | 0 | not significant |
| 4547 | GO_REGULATION_OF_GENE_EXPRESSION_EPIGENETIC               | -1.12 | 0.88 | 0 | 0 | 0 | not significant |
| 4548 | PASINI_SUZ12_TARGETS_DN                                   | -1.12 | 0.84 | 0 | 0 | 0 | not significant |
| 4549 | GENTILE_UV_HIGH_DOSE_DN                                   | -1.12 | 0.79 | 0 | 0 | 0 | not significant |
| 4550 | GO_MUSCLE_CELL_DIFFERENTIATION                            | -1.12 | 0.77 | 0 | 0 | 0 | not significant |
| 4551 | KEGG_REGULATION_OF_ACTIN_CYTOSKELETON                     | -1.12 | 0.74 | 0 | 0 | 0 | not significant |
| 4552 | GO_ENDOPLASMIC_RETICULUM_TO_GOLGI_VESICLE_MEDIATED_TRANS  | -1.12 | 0.73 | 0 | 0 | 0 | not significant |
| 4553 | GO_EXTRACELLULAR_STRUCTURE_ORGANIZATION                   | -1.12 | 0.73 | 0 | 0 | 0 | not significant |
| 4554 | GO_NEGATIVE_REGULATION_OF_NEURON_DIFFERENTIATION          | -1.12 | 0.72 | 0 | 0 | 0 | not significant |
| 4555 | GO_ALCOHOL_METABOLIC_PROCESS                              | -1.12 | 0.71 | 0 | 0 | 0 | not significant |
| 4556 | GO_POSITIVE_REGULATION_OF_CELL_CELL_ADHESION              | -1.12 | 0.71 | 0 | 0 | 0 | not significant |
| 4557 | ROZANOV_MMP14_TARGETS_UP                                  | -1.12 | 0.71 | 0 | 0 | 0 | not significant |
| 4558 | GO_REGULATION_OF_CELL_SUBSTRATE_ADHESION                  | -1.12 | 0.69 | 0 | 0 | 0 | not significant |
| 4559 | GO_RNA_POLYMERASE_II_TRANSCRIPTION_FACTOR_COMPLEX         | -1.12 | 0.69 | 0 | 0 | 0 | not significant |
| 4560 | IGARASHI_ATF4_TARGETS_DN                                  | -1.12 | 0.67 | 0 | 0 | 0 | not significant |
| 4561 | CHR21Q22                                                  | -1.12 | 0.66 | 0 | 0 | 0 | not significant |
| 4562 | GO_REGULATION_OF_NUCLEOCYTOPLASMIC_TRANSPORT              | -1.12 | 0.66 | 0 | 0 | 0 | not significant |
| 4563 | IL15_UP.V1_UP                                             | -1.12 | 0.66 | 0 | 0 | 0 | not significant |
| 4564 | ONDER_CDH1_TARGETS_1_UP                                   | -1.12 | 0.66 | 0 | 0 | 0 | not significant |
| 4565 | GO_REGULATION_OF_PRODUCTION_OF_MOLECULAR_MEDIATOR_OF_I    | -1.12 | 0.62 | 0 | 0 | 0 | not significant |
| 4566 | GO_POTASSIUM_ION_TRANSPORT                                | -1.12 | 0.61 | 0 | 0 | 0 | not significant |

|      |                                                             |       |      |   |   |   |                 |
|------|-------------------------------------------------------------|-------|------|---|---|---|-----------------|
| 4567 | GO_REGULATION_OF_CARBOHYDRATE_CATABOLIC_PROCESS             | -1.12 | 0.61 | 0 | 0 | 0 | not significant |
| 4568 | REACTOME_ACTIVATION_OF_NMDA_RECEPTORS_AND_POSTSYNAPTIC      | -1.12 | 0.61 | 0 | 0 | 0 | not significant |
| 4569 | CHIANG_LIVER_CANCER_SUBCLASS_PROLIFERATION_DN               | -1.12 | 0.59 | 0 | 0 | 0 | not significant |
| 4570 | DAUER_STAT3_TARGETS_DN                                      | -1.12 | 0.59 | 0 | 0 | 0 | not significant |
| 4571 | GO_ER_NUCLEUS_SIGNALING_PATHWAY                             | -1.12 | 0.59 | 0 | 0 | 0 | not significant |
| 4572 | KYNG_DNA_DAMAGE_BY_UV                                       | -1.12 | 0.59 | 0 | 0 | 0 | not significant |
| 4573 | MARTINEZ_RESPONSE_TO TRABECTEDIN                            | -1.12 | 0.59 | 0 | 0 | 0 | not significant |
| 4574 | REACTOME_E3_UBIQUITIN_LIGASES_UBIQUITINATE_TARGET_PROTEINS  | -1.12 | 0.59 | 0 | 0 | 0 | not significant |
| 4575 | CHR10Q2                                                     | -1.12 | 0.58 | 0 | 0 | 0 | not significant |
| 4576 | GO_REGULATION_OF_PROTEIN_EXPORT_FROM_NUCLEUS                | -1.12 | 0.58 | 0 | 0 | 0 | not significant |
| 4577 | SETLUR_PROSTATE_CANCER_TMRSS2_ERG_FUSION_UP                 | -1.12 | 0.58 | 0 | 0 | 0 | not significant |
| 4578 | YAO_TEMPORAL_RESPONSE_TO_PROGESTERONE_CLUSTER_16            | -1.12 | 0.58 | 0 | 0 | 0 | not significant |
| 4579 | CHR1Q25                                                     | -1.12 | 0.57 | 0 | 0 | 0 | not significant |
| 4580 | ZHAN_MULTIPLE_MYELOMA_LB_UP                                 | -1.12 | 0.57 | 0 | 0 | 0 | not significant |
| 4581 | GO_CIRCADIAN_REGULATION_OF_GENE_EXPRESSION                  | -1.12 | 0.56 | 0 | 0 | 0 | not significant |
| 4582 | GO_PHAGOCYTIC_VESICLE_MEMBRANE                              | -1.12 | 0.56 | 0 | 0 | 0 | not significant |
| 4583 | GO_CYTOKINETIC_PROCESS                                      | -1.12 | 0.55 | 0 | 0 | 0 | not significant |
| 4584 | GO_E_BOX_BINDING                                            | -1.12 | 0.55 | 0 | 0 | 0 | not significant |
| 4585 | GO_NEGATIVE_REGULATION_OF_SMOOTHENED_SIGNALING_PATHWAY      | -1.12 | 0.55 | 0 | 0 | 0 | not significant |
| 4586 | GO_NUCLEOSIDE_DIPHOSPHATE_METABOLIC_PROCESS                 | -1.12 | 0.55 | 0 | 0 | 0 | not significant |
| 4587 | GO_T_TUBULE                                                 | -1.12 | 0.55 | 0 | 0 | 0 | not significant |
| 4588 | REACTOME_RHO_GTPASES_ACTIVATE_WASPS_AND WAVES               | -1.12 | 0.55 | 0 | 0 | 0 | not significant |
| 4589 | BIOCARTA_PYK2_PATHWAY                                       | -1.12 | 0.54 | 0 | 0 | 0 | not significant |
| 4590 | GO_REGULATION_OF_COLLAGEN_BIOSYNTHETIC_PROCESS              | -1.12 | 0.54 | 0 | 0 | 0 | not significant |
| 4591 | HOWLIN_PUBERTAL_MAMMARY_GLAND                               | -1.12 | 0.54 | 0 | 0 | 0 | not significant |
| 4592 | ZHAN_LATE_DIFFERENTIATION_GENES_UP                          | -1.12 | 0.54 | 0 | 0 | 0 | not significant |
| 4593 | GO_ESTABLISHMENT_OF_MITOCHONDRION_LOCALIZATION              | -1.12 | 0.53 | 0 | 0 | 0 | not significant |
| 4594 | GO_INO80_TYPE_COMPLEX                                       | -1.12 | 0.53 | 0 | 0 | 0 | not significant |
| 4595 | JAZAG_TGFB1_SIGNALING_DN                                    | -1.12 | 0.53 | 0 | 0 | 0 | not significant |
| 4596 | LEE_LIVER_CANCER_MYC_DN                                     | -1.12 | 0.53 | 0 | 0 | 0 | not significant |
| 4597 | PID_ALPHA_SYNUCLEIN_PATHWAY                                 | -1.12 | 0.53 | 0 | 0 | 0 | not significant |
| 4598 | GO_MODIFIED_AMINO_ACID_TRANSPORT                            | -1.12 | 0.52 | 0 | 0 | 0 | not significant |
| 4599 | PID_INSULIN_GLUCOSE_PATHWAY                                 | -1.12 | 0.52 | 0 | 0 | 0 | not significant |
| 4600 | GO_RESPONSE_TO_UV_B                                         | -1.12 | 0.51 | 0 | 0 | 0 | not significant |
| 4601 | GO_TOLL LIKE RECEPTOR_4_SIGNALING_PATHWAY                   | -1.12 | 0.51 | 0 | 0 | 0 | not significant |
| 4602 | REACTOME_EXTENSION_OF_TELOMERES                             | -1.12 | 0.51 | 0 | 0 | 0 | not significant |
| 4603 | GO_NEGATIVE_REGULATION_OF_CATION_CHANNEL_ACTIVITY           | -1.12 | 0.50 | 0 | 0 | 0 | not significant |
| 4604 | LEE_LIVER_CANCER                                            | -1.12 | 0.50 | 0 | 0 | 0 | not significant |
| 4605 | REACTOME_NEPHRIN_FAMILY_INTERACTIONS                        | -1.12 | 0.50 | 0 | 0 | 0 | not significant |
| 4606 | ROETH_TERT_TARGETS_UP                                       | -1.12 | 0.50 | 0 | 0 | 0 | not significant |
| 4607 | GO_RESPONSE_TO_INSECTICIDE                                  | -1.12 | 0.49 | 0 | 0 | 0 | not significant |
| 4608 | REACTOME_NOTCH3_INTRACELLULAR_DOMAIN_REGULATES_TRANSCRI     | -1.12 | 0.49 | 0 | 0 | 0 | not significant |
| 4609 | GO_CLATHRIN_HEAVY_CHAIN_BINDING                             | -1.12 | 0.48 | 0 | 0 | 0 | not significant |
| 4610 | GO_NEGATIVE_REGULATION_OF_NEURAL_PRECURSOR_CELL_PROLIFEI    | -1.12 | 0.48 | 0 | 0 | 0 | not significant |
| 4611 | GO_NEGATIVE_REGULATION_OF_PROTEIN_EXPORT_FROM_NUCLEUS       | -1.12 | 0.48 | 0 | 0 | 0 | not significant |
| 4612 | GO_TYPE_B_PANCREATIC_CELL_APOPTOTIC_PROCESS                 | -1.12 | 0.48 | 0 | 0 | 0 | not significant |
| 4613 | MATZUK_OVULATION                                            | -1.12 | 0.48 | 0 | 0 | 0 | not significant |
| 4614 | OXFORD_RALB_TARGETS_DN                                      | -1.12 | 0.48 | 0 | 0 | 0 | not significant |
| 4615 | REACTOME_SYNTHESIS_OF_PE                                    | -1.12 | 0.48 | 0 | 0 | 0 | not significant |
| 4616 | GO_CAMP_DEPENDENT_PROTEIN_KINASE_COMPLEX                    | -1.12 | 0.47 | 0 | 0 | 0 | not significant |
| 4617 | GO_DNA_REPAIR_COMPLEX_ASSEMBLY                              | -1.12 | 0.47 | 0 | 0 | 0 | not significant |
| 4618 | GO_GLUCOSE_CATABOLIC_PROCESS                                | -1.12 | 0.47 | 0 | 0 | 0 | not significant |
| 4619 | GO_PRESYNAPTIC_ENDOCYTTIC_ZONE                              | -1.12 | 0.47 | 0 | 0 | 0 | not significant |
| 4620 | GO_REGULATION_OF_CELL_PROLIFERATION_INVOLVED_IN_KIDNEY_DEI  | -1.12 | 0.47 | 0 | 0 | 0 | not significant |
| 4621 | GO_NEGATIVE_REGULATION_OF_ESTABLISHMENT_OF_PROTEIN_LOCAL    | -1.12 | 0.46 | 0 | 0 | 0 | not significant |
| 4622 | NIKOLSKY_BREAST_CANCER_1Q32_AMPlicON                        | -1.12 | 0.46 | 0 | 0 | 0 | not significant |
| 4623 | GO_METANEPHRIC_EPITHELIUM_DEVELOPMENT                       | -1.12 | 0.45 | 0 | 0 | 0 | not significant |
| 4624 | GO_POSITIVE_REGULATION_OF_TOLL LIKE RECEPTOR_4_SIGNALING_F  | -1.12 | 0.45 | 0 | 0 | 0 | not significant |
| 4625 | MOOTHA_PYR                                                  | -1.12 | 0.45 | 0 | 0 | 0 | not significant |
| 4626 | REACTOME_LRR_FLI1_INTERACTING_PROTEIN_1_LRRFIP1_ACTIVATES_I | -1.12 | 0.45 | 0 | 0 | 0 | not significant |
| 4627 | GO_INTRINSIC_APOPTOTIC_SIGNALING_PATHWAY_IN_RESPONSE_TO_H   | -1.12 | 0.44 | 0 | 0 | 0 | not significant |
| 4628 | GO_MODULATION_OF_SIGNAL_TRANSDUCTION_IN_OTHER_ORGANISM      | -1.12 | 0.43 | 0 | 0 | 0 | not significant |
| 4629 | VICENT_METASTASIS_UP                                        | -1.12 | 0.43 | 0 | 0 | 0 | not significant |
| 4630 | GO_CYTOSKELETON_ORGANIZATION                                | -1.11 | 1.36 | 0 | 0 | 0 | not significant |
| 4631 | YOSHIMURA_MAPK8_TARGETS_UP                                  | -1.11 | 1.26 | 0 | 0 | 0 | not significant |
| 4632 | GO_CELLULAR_PROTEIN_CATABOLIC_PROCESS                       | -1.11 | 1.15 | 0 | 0 | 0 | not significant |
| 4633 | GO_POSITIVE_REGULATION_OF_CELLULAR_COMPONENT_ORGANIZATIO    | -1.11 | 1.11 | 0 | 0 | 0 | not significant |
| 4634 | GO_ORGANONITROGEN_COMPOUND_CATABOLIC_PROCESS                | -1.11 | 1.07 | 0 | 0 | 0 | not significant |
| 4635 | GO_ANCHORING_JUNCTION                                       | -1.11 | 0.90 | 0 | 0 | 0 | not significant |
| 4636 | MARTINEZ_RB1_AND_TP53_TARGETS_DN                            | -1.11 | 0.87 | 0 | 0 | 0 | not significant |
| 4637 | GO_NEGATIVE_REGULATION_OF_CELL_POPULATION_PROLIFERATION     | -1.11 | 0.80 | 0 | 0 | 0 | not significant |
| 4638 | GO_TRANSFERASE_COMPLEX_TRANSFERRING_PHOSPHORUS_CONTAIN      | -1.11 | 0.79 | 0 | 0 | 0 | not significant |
| 4639 | GO_POSITIVE_REGULATION_OF_CELL_ADHESION                     | -1.11 | 0.77 | 0 | 0 | 0 | not significant |
| 4640 | REACTOME_ORGANELLE_BIOGENESIS_AND_MAINTENANCE               | -1.11 | 0.76 | 0 | 0 | 0 | not significant |
| 4641 | GO_POSITIVE_REGULATION_OF_CYTOKINE_PRODUCTION               | -1.11 | 0.75 | 0 | 0 | 0 | not significant |
| 4642 | THEILGAARD_NEUTROPHIL_AT_SKIN_WOUND_DN                      | -1.11 | 0.73 | 0 | 0 | 0 | not significant |
| 4643 | GO_RESPONSE_TO_INSULIN                                      | -1.11 | 0.72 | 0 | 0 | 0 | not significant |
| 4644 | GO_COATED_VESICLE_MEMBRANE                                  | -1.11 | 0.69 | 0 | 0 | 0 | not significant |
| 4645 | GO_PRODUCTION_OF_MOLECULAR_MEDIATOR_OF_IMMUNE_RESPONSE      | -1.11 | 0.68 | 0 | 0 | 0 | not significant |
| 4646 | GO_PROTEIN_PROCESSING                                       | -1.11 | 0.68 | 0 | 0 | 0 | not significant |
| 4647 | AKT_UP_MTOR_DN_V1_UP                                        | -1.11 | 0.67 | 0 | 0 | 0 | not significant |
| 4648 | GO_MYELOID_LEUKOCYTE_DIFFERENTIATION                        | -1.11 | 0.67 | 0 | 0 | 0 | not significant |
| 4649 | GO_POSITIVE_REGULATION_OF_BINDING                           | -1.11 | 0.67 | 0 | 0 | 0 | not significant |
| 4650 | DAVICIONI_MOLECULAR_ARMS_VS_ERMS_DN                         | -1.11 | 0.66 | 0 | 0 | 0 | not significant |
| 4651 | GO_BONE_DEVELOPMENT                                         | -1.11 | 0.66 | 0 | 0 | 0 | not significant |
| 4652 | GO_RESPONSE_TO_TOPOLOGICALLY_INCORRECT_PROTEIN              | -1.11 | 0.66 | 0 | 0 | 0 | not significant |
| 4653 | RAF_UP_V1_DN                                                | -1.11 | 0.66 | 0 | 0 | 0 | not significant |
| 4654 | BOQUEST_STEM_CELL_DN                                        | -1.11 | 0.64 | 0 | 0 | 0 | not significant |
| 4655 | GO_TOLL LIKE RECEPTOR_SIGNALING_PATHWAY                     | -1.11 | 0.64 | 0 | 0 | 0 | not significant |
| 4656 | GAVIN_FOXP3_TARGETS_CLUSTER_T7                              | -1.11 | 0.62 | 0 | 0 | 0 | not significant |
| 4657 | GO_COATED_MEMBRANE                                          | -1.11 | 0.62 | 0 | 0 | 0 | not significant |
| 4658 | SASSON_RESPONSE_TO_GONADOTROPHINS_UP                        | -1.11 | 0.62 | 0 | 0 | 0 | not significant |
| 4659 | ACEVEDO_LIVER_CANCER_WITH_H3K27ME3_UP                       | -1.11 | 0.60 | 0 | 0 | 0 | not significant |
| 4660 | ATF2_UP_V1_UP                                               | -1.11 | 0.60 | 0 | 0 | 0 | not significant |
| 4661 | GO_PEROXISOME_ORGANIZATION                                  | -1.11 | 0.60 | 0 | 0 | 0 | not significant |
| 4662 | GO_REGULATION_OF_PHOSPHOPROTEIN_PHOSPHATASE_ACTIVITY        | -1.11 | 0.60 | 0 | 0 | 0 | not significant |
| 4663 | MARKEY_RB1_CHRONIC_LOF_UP                                   | -1.11 | 0.60 | 0 | 0 | 0 | not significant |
| 4664 | PJAJANA_BRCA_CENTERED_NETWORK                               | -1.11 | 0.60 | 0 | 0 | 0 | not significant |
| 4665 | BANDRES_RESPONSE_TO_CARMUSTIN_MGMT_48HR_DN                  | -1.11 | 0.59 | 0 | 0 | 0 | not significant |
| 4666 | NIKOLSKY_BREAST_CANCER_17Q21_Q21_AMPlicON                   | -1.11 | 0.58 | 0 | 0 | 0 | not significant |
| 4667 | VANLOO_SP3_TARGETS_DN                                       | -1.11 | 0.58 | 0 | 0 | 0 | not significant |
| 4668 | CHARAFE_BREAST_CANCER_BASAL_VS_MESENCHYMAL_UP               | -1.11 | 0.57 | 0 | 0 | 0 | not significant |
| 4669 | GO_POSITIVE_REGULATION_OF_ADAPTIVE_IMMUNE_RESPONSE          | -1.11 | 0.56 | 0 | 0 | 0 | not significant |
| 4670 | GO_REGULATION_OF_CELL_MATRIX_ADHESION                       | -1.11 | 0.56 | 0 | 0 | 0 | not significant |
| 4671 | KEGG_LEUKOCYTE_TRANSENDOTHELIAL_MIGRATION                   | -1.11 | 0.56 | 0 | 0 | 0 | not significant |
| 4672 | KEGG_NUCLEOTIDE_EXCISION_REPAIR                             | -1.11 | 0.56 | 0 | 0 | 0 | not significant |
| 4673 | KRAS_300_UP_V1_UP                                           | -1.11 | 0.56 | 0 | 0 | 0 | not significant |
| 4674 | REACTOME_GOLGI_ASSOCIATED_VESICLE_BIOGENESIS                | -1.11 | 0.56 | 0 | 0 | 0 | not significant |
| 4675 | KIM_BIPOLAR_DISORDER_OLIGODENDROCYTE_DENSITY_CORR_DN        | -1.11 | 0.55 | 0 | 0 | 0 | not significant |

|      |                                                            |       |      |   |   |   |                 |
|------|------------------------------------------------------------|-------|------|---|---|---|-----------------|
| 4676 | GO_NEGATIVE_REGULATION_OF_RESPONSE_TO_OXIDATIVE_STRESS     | -1.11 | 0.54 | 0 | 0 | 0 | not significant |
| 4677 | GO_OLIGODENDROCYTE_DEVELOPMENT                             | -1.11 | 0.54 | 0 | 0 | 0 | not significant |
| 4678 | SCHAEFFER_PROSTATE_DEVELOPMENT_12HR_UP                     | -1.11 | 0.54 | 0 | 0 | 0 | not significant |
| 4679 | GO_MRNA_CLEAVAGE_FACTOR_COMPLEX                            | -1.11 | 0.53 | 0 | 0 | 0 | not significant |
| 4680 | GO_POSITIVE_REGULATION_OF_RESPONSE_TO_ENDOPLASMIC_RETICU   | -1.11 | 0.53 | 0 | 0 | 0 | not significant |
| 4681 | GO_T_HELPER_1_TYPE_IMMUNE_RESPONSE                         | -1.11 | 0.53 | 0 | 0 | 0 | not significant |
| 4682 | PID_MYC_REPRESS_PATHWAY                                    | -1.11 | 0.53 | 0 | 0 | 0 | not significant |
| 4683 | REACTOME_THE_PHOTOTRANSDUCTION_CASCADE                     | -1.11 | 0.53 | 0 | 0 | 0 | not significant |
| 4684 | GO_POSITIVE_REGULATION_OF_WOUND_HEALING                    | -1.11 | 0.52 | 0 | 0 | 0 | not significant |
| 4685 | GO_PROTEIN_INSERTION_INTO_MITOCHONDRIAL_MEMBRANE           | -1.11 | 0.52 | 0 | 0 | 0 | not significant |
| 4686 | GO_REGULATION_OF_GLIAL_CELL_DIFFERENTIATION                | -1.11 | 0.52 | 0 | 0 | 0 | not significant |
| 4687 | PID_S1P_S1P2_PATHWAY                                       | -1.11 | 0.52 | 0 | 0 | 0 | not significant |
| 4688 | WANG_LSD1_TARGETS_DN                                       | -1.11 | 0.52 | 0 | 0 | 0 | not significant |
| 4689 | GO_HISTONE_MRNA_METABOLIC_PROCESS                          | -1.11 | 0.51 | 0 | 0 | 0 | not significant |
| 4690 | GO_NEGATIVE_REGULATION_OF_COAGULATION                      | -1.11 | 0.51 | 0 | 0 | 0 | not significant |
| 4691 | GO_PEPIDYL_METHIONINE_MODIFICATION                         | -1.11 | 0.51 | 0 | 0 | 0 | not significant |
| 4692 | GO_PHOTORECEPTOR_CELL_MAINTENANCE                          | -1.11 | 0.51 | 0 | 0 | 0 | not significant |
| 4693 | GO_POSITIVE_REGULATION_OF_SPROUTING_ANGIOGENESIS           | -1.11 | 0.51 | 0 | 0 | 0 | not significant |
| 4694 | LEIN_LOCALIZED_TO_PROXIMAL_DENDRITES                       | -1.11 | 0.51 | 0 | 0 | 0 | not significant |
| 4695 | REACTOME_DISEASES_ASSOCIATED_WITH_N_GLYCOSYLATION_OF_PRC   | -1.11 | 0.51 | 0 | 0 | 0 | not significant |
| 4696 | AMIT_SERUM_RESPONSE_480_MCF10A                             | -1.11 | 0.50 | 0 | 0 | 0 | not significant |
| 4697 | GO_L_AMINO_ACID_TRANSPORT                                  | -1.11 | 0.50 | 0 | 0 | 0 | not significant |
| 4698 | GO_NEGATIVE_REGULATION_OF_CELLULAR_RESPONSE_TO_INSULIN_S   | -1.11 | 0.50 | 0 | 0 | 0 | not significant |
| 4699 | GO_REGULATION_OF GRANULOCYTE DIFFERENTIATION               | -1.11 | 0.50 | 0 | 0 | 0 | not significant |
| 4700 | KIM_LIVER_CANCER_POOR_SURVIVAL_DN                          | -1.11 | 0.50 | 0 | 0 | 0 | not significant |
| 4701 | PID_MAPK_TRK_PATHWAY                                       | -1.11 | 0.50 | 0 | 0 | 0 | not significant |
| 4702 | REACTOME_REGULATION_OF_INNATE_IMMUNE_RESPONSES_TO_CYTOS    | -1.11 | 0.50 | 0 | 0 | 0 | not significant |
| 4703 | SESTO_RESPONSE_TO_UV_C6                                    | -1.11 | 0.50 | 0 | 0 | 0 | not significant |
| 4704 | GO_DOUBLE_STRANDED_TELOMERIC_DNA_BINDING                   | -1.11 | 0.49 | 0 | 0 | 0 | not significant |
| 4705 | GO_GLUTAMATE_SECRETION                                     | -1.11 | 0.49 | 0 | 0 | 0 | not significant |
| 4706 | GO_REGULATION_OF_ER_ASSOCIATED_UBIQUITIN_DEPENDENT_PROTEI  | -1.11 | 0.49 | 0 | 0 | 0 | not significant |
| 4707 | REACTOME_GLUTATHIONE_SYNTHESIS_AND_RECYCLING               | -1.11 | 0.49 | 0 | 0 | 0 | not significant |
| 4708 | YUAN_ZNF143_PARTNERS                                       | -1.11 | 0.49 | 0 | 0 | 0 | not significant |
| 4709 | FARMER_BREAST_CANCER_CLUSTER_3                             | -1.11 | 0.48 | 0 | 0 | 0 | not significant |
| 4710 | GO_CHEMOKINE_RECEPTOR_BINDING                              | -1.11 | 0.48 | 0 | 0 | 0 | not significant |
| 4711 | GO_POSITIVE_REGULATION_OF_TRANSCRIPTION_OF_NOTCH_RECEPTC   | -1.11 | 0.48 | 0 | 0 | 0 | not significant |
| 4712 | GO_RESPONSE_TO_NITRIC_OXIDE                                | -1.11 | 0.48 | 0 | 0 | 0 | not significant |
| 4713 | GO_RETINOIC_ACID_RECEPTOR_BINDING                          | -1.11 | 0.48 | 0 | 0 | 0 | not significant |
| 4714 | REACTOME_MOLYBDENUM_COFACTOR_BIOSYNTHESIS                  | -1.11 | 0.48 | 0 | 0 | 0 | not significant |
| 4715 | REACTOME_RAP1_SIGNALING                                    | -1.11 | 0.48 | 0 | 0 | 0 | not significant |
| 4716 | ZHANG_ANTIVIRAL_RESPONSE_TO_RIBAVIRIN_UP                   | -1.11 | 0.48 | 0 | 0 | 0 | not significant |
| 4717 | BIOCARTA_STATHMIN_PATHWAY                                  | -1.11 | 0.47 | 0 | 0 | 0 | not significant |
| 4718 | GO_RESPONSE_TO_PH                                          | -1.11 | 0.47 | 0 | 0 | 0 | not significant |
| 4719 | REACTOME_METABOLISM_OF_PORPHYRINS                          | -1.11 | 0.47 | 0 | 0 | 0 | not significant |
| 4720 | GO_GOLGI_TRANSPORT_COMPLEX                                 | -1.11 | 0.46 | 0 | 0 | 0 | not significant |
| 4721 | TOMLINS_METASTASIS_UP                                      | -1.11 | 0.46 | 0 | 0 | 0 | not significant |
| 4722 | CAIRO_HEPATOBLASTOMA_POOR_SURVIVAL                         | -1.11 | 0.45 | 0 | 0 | 0 | not significant |
| 4723 | GO_CARDIAC_MUSCLE_FIBER_DEVELOPMENT                        | -1.11 | 0.45 | 0 | 0 | 0 | not significant |
| 4724 | GO_GAS_HOMEOSTASIS                                         | -1.11 | 0.45 | 0 | 0 | 0 | not significant |
| 4725 | GO_GLOMERULAR_EPITHELIAL_CELL_DIFFERENTIATION              | -1.11 | 0.45 | 0 | 0 | 0 | not significant |
| 4726 | GO_INTERLEUKIN_2_SECRETION                                 | -1.11 | 0.45 | 0 | 0 | 0 | not significant |
| 4727 | GO_MIDGUT_DEVELOPMENT                                      | -1.11 | 0.45 | 0 | 0 | 0 | not significant |
| 4728 | GO_REGULATION_OF_CARDIAC_MUSCLE_CELL_MEMBRANE_REPOLARIZ    | -1.11 | 0.45 | 0 | 0 | 0 | not significant |
| 4729 | GO_INTERFERON_RECEPTOR_ACTIVITY                            | -1.11 | 0.44 | 0 | 0 | 0 | not significant |
| 4730 | GO_MEIOSIS_II_CELL_CYCLE_PROCESS                           | -1.11 | 0.44 | 0 | 0 | 0 | not significant |
| 4731 | GO_REGULATION_OF_RESPIRATORY_GASEOUS_EXCHANGE_BY_NEURO     | -1.11 | 0.43 | 0 | 0 | 0 | not significant |
| 4732 | LU_TUMOR_VASCULATURE_DN                                    | -1.11 | 0.43 | 0 | 0 | 0 | not significant |
| 4733 | GO_ROSTROCAUDAL_NEURAL_TUBE_PATTERNING                     | -1.11 | 0.42 | 0 | 0 | 0 | not significant |
| 4734 | NYTTEN_EZH2_TARGETS_DN                                     | -1.10 | 1.52 | 0 | 0 | 0 | not significant |
| 4735 | GO_PROTEIN_PHOSPHORYLATION                                 | -1.10 | 1.30 | 0 | 0 | 0 | not significant |
| 4736 | GO_SIGNALING_RECEPTOR_BINDING                              | -1.10 | 0.97 | 0 | 0 | 0 | not significant |
| 4737 | IVANOVA_HEMATOPOIESIS_EARLY_PROGENITOR                     | -1.10 | 0.94 | 0 | 0 | 0 | not significant |
| 4738 | GO_ORGANOPHOSPHATE_METABOLIC_PROCESS                       | -1.10 | 0.90 | 0 | 0 | 0 | not significant |
| 4739 | GO_NEGATIVE_REGULATION_OF_DEVELOPMENTAL_PROCESS            | -1.10 | 0.83 | 0 | 0 | 0 | not significant |
| 4740 | GO_INFLAMMATORY_RESPONSE                                   | -1.10 | 0.80 | 0 | 0 | 0 | not significant |
| 4741 | BRUINS_UVC_RESPONSE_EARLY_LATE                             | -1.10 | 0.78 | 0 | 0 | 0 | not significant |
| 4742 | MULLIGHAN_NPM1_SIGNATURE_3_UP                              | -1.10 | 0.76 | 0 | 0 | 0 | not significant |
| 4743 | GO_LEUKOCYTE_CELL_CELL_ADHESION                            | -1.10 | 0.72 | 0 | 0 | 0 | not significant |
| 4744 | GO_SENSORY_SYSTEM_DEVELOPMENT                              | -1.10 | 0.71 | 0 | 0 | 0 | not significant |
| 4745 | REACTOME ASPARAGINE_N_LINKED_GLYCOSYLATION                 | -1.10 | 0.71 | 0 | 0 | 0 | not significant |
| 4746 | GO_LIPID_LOCALIZATION                                      | -1.10 | 0.69 | 0 | 0 | 0 | not significant |
| 4747 | GO_REPRODUCTIVE_SYSTEM_DEVELOPMENT                         | -1.10 | 0.68 | 0 | 0 | 0 | not significant |
| 4748 | GO_STEROID_METABOLIC_PROCESS                               | -1.10 | 0.67 | 0 | 0 | 0 | not significant |
| 4749 | PRC2_EZH2_UP.V1_DN                                         | -1.10 | 0.67 | 0 | 0 | 0 | not significant |
| 4750 | GARCIA_TARGETS_OF_FL11_AND_DAX1_DN                         | -1.10 | 0.66 | 0 | 0 | 0 | not significant |
| 4751 | GO_REGULATION_OF_MEMBRANE_POTENTIAL                        | -1.10 | 0.66 | 0 | 0 | 0 | not significant |
| 4752 | HALLMARK_P53_PATHWAY                                       | -1.10 | 0.65 | 0 | 0 | 0 | not significant |
| 4753 | GO_ENDOCYTIC_VESICLE                                       | -1.10 | 0.64 | 0 | 0 | 0 | not significant |
| 4754 | GO_REGULATION_OF_INFLAMMATORY_RESPONSE                     | -1.10 | 0.64 | 0 | 0 | 0 | not significant |
| 4755 | REACTOME_RRNA_PROCESSING_IN_THE_NUCLEUS_AND_CYTOSOL        | -1.10 | 0.64 | 0 | 0 | 0 | not significant |
| 4756 | GO_MEMBRANE_DOCKING                                        | -1.10 | 0.63 | 0 | 0 | 0 | not significant |
| 4757 | KEGG_FC_GAMMA_R_MEDIATED_PHAGOCYTOSIS                      | -1.10 | 0.63 | 0 | 0 | 0 | not significant |
| 4758 | GO_CARBOHYDRATE_TRANSPORT                                  | -1.10 | 0.62 | 0 | 0 | 0 | not significant |
| 4759 | GO_ACTOMYOSIN_STRUCTURE_ORGANIZATION                       | -1.10 | 0.61 | 0 | 0 | 0 | not significant |
| 4760 | GO_CYTOKINE_RECEPTOR_BINDING                               | -1.10 | 0.61 | 0 | 0 | 0 | not significant |
| 4761 | GO_CYTOKINE_SECRETION                                      | -1.10 | 0.60 | 0 | 0 | 0 | not significant |
| 4762 | BROWNE_HCMV_INFECTION_12HR_UP                              | -1.10 | 0.58 | 0 | 0 | 0 | not significant |
| 4763 | GO_BETA_CATENIN_BINDING                                    | -1.10 | 0.58 | 0 | 0 | 0 | not significant |
| 4764 | GO_POSITIVE_REGULATION_OF_DEVELOPMENTAL_GROWTH             | -1.10 | 0.58 | 0 | 0 | 0 | not significant |
| 4765 | GO_REGULATION_OF_SYNAPSE_STRUCTURE_OR_ACTIVITY             | -1.10 | 0.58 | 0 | 0 | 0 | not significant |
| 4766 | GO_VITAMIN_BINDING                                         | -1.10 | 0.58 | 0 | 0 | 0 | not significant |
| 4767 | ONDER_CDH1_SIGNALING_VIA_CTNNB1                            | -1.10 | 0.58 | 0 | 0 | 0 | not significant |
| 4768 | GO_EXTRINSIC_APOPTOTIC_SIGNALING_PATHWAY_VIA_DEATH_DOMAIN  | -1.10 | 0.56 | 0 | 0 | 0 | not significant |
| 4769 | GO_POSITIVE_REGULATION_OF_PROTEIN_LOCALIZATION_TO_NUCLEUS  | -1.10 | 0.55 | 0 | 0 | 0 | not significant |
| 4770 | GO_4_IRON_4_SULFUR_CLUSTER_BINDING                         | -1.10 | 0.54 | 0 | 0 | 0 | not significant |
| 4771 | GO_CELL_ADHESION_MEDIATOR_ACTIVITY                         | -1.10 | 0.54 | 0 | 0 | 0 | not significant |
| 4772 | GO_FEMALE_SEX_DIFFERENTIATION                              | -1.10 | 0.54 | 0 | 0 | 0 | not significant |
| 4773 | GO_GLIAL_CELL_DEVELOPMENT                                  | -1.10 | 0.54 | 0 | 0 | 0 | not significant |
| 4774 | GO_NEGATIVE_REGULATION_OF_CELL_MORPHOGENESIS_INVOLVED_IN   | -1.10 | 0.54 | 0 | 0 | 0 | not significant |
| 4775 | GO_POSITIVE_REGULATION_OF_CD4_POSITIVE_ALPHA_BETA_T_CELL_# | -1.10 | 0.54 | 0 | 0 | 0 | not significant |
| 4776 | GO_CHONDROCYTE_DIFFERENTIATION                             | -1.10 | 0.53 | 0 | 0 | 0 | not significant |
| 4777 | GO_CLATHRIN_COAT                                           | -1.10 | 0.53 | 0 | 0 | 0 | not significant |
| 4778 | GO_LIPID_DROPLET                                           | -1.10 | 0.53 | 0 | 0 | 0 | not significant |
| 4779 | GO_MUSCLE_ORGAN_MORPHOGENESIS                              | -1.10 | 0.53 | 0 | 0 | 0 | not significant |
| 4780 | GO_PHOTORECEPTOR_OUTER_SEGMENT                             | -1.10 | 0.53 | 0 | 0 | 0 | not significant |
| 4781 | HUMMERICH_SKIN_CANCER_PROGRESSION_DN                       | -1.10 | 0.53 | 0 | 0 | 0 | not significant |
| 4782 | REACTOME_ERC6_CSB_AND_EHMT2_G9A_POSITIVELY_REGULATE_RR     | -1.10 | 0.53 | 0 | 0 | 0 | not significant |
| 4783 | LIN_MELANOMA_COPY_NUMBER_DN                                | -1.10 | 0.52 | 0 | 0 | 0 | not significant |
| 4784 | REACTOME_DEPURINATION                                      | -1.10 | 0.52 | 0 | 0 | 0 | not significant |

|      |                                                             |       |      |   |   |   |                 |
|------|-------------------------------------------------------------|-------|------|---|---|---|-----------------|
| 4785 | GO_NUCLEOTIDE_EXCISION_REPAIR_DNA_DAMAGE_RECOGNITION        | -1.10 | 0.51 | 0 | 0 | 0 | not significant |
| 4786 | GO_RNA_METHYLATION                                          | -1.10 | 0.51 | 0 | 0 | 0 | not significant |
| 4787 | WEIGEL_OXIDATIVE_STRESS_RESPONSE                            | -1.10 | 0.51 | 0 | 0 | 0 | not significant |
| 4788 | CHR7P21                                                     | -1.10 | 0.50 | 0 | 0 | 0 | not significant |
| 4789 | REACTOME_ACTIVATION_OF_KAINATE_RECEPTORS_UPON_GLUTAMATE     | -1.10 | 0.50 | 0 | 0 | 0 | not significant |
| 4790 | CHR4Q28                                                     | -1.10 | 0.49 | 0 | 0 | 0 | not significant |
| 4791 | GO_INTRACELLULAR_LIGAND_GATED_ION_CHANNEL_ACTIVITY          | -1.10 | 0.49 | 0 | 0 | 0 | not significant |
| 4792 | GO_POSITIVE_REGULATION_OF_VIRAL_RELEASE_FROM_HOST_CELL      | -1.10 | 0.49 | 0 | 0 | 0 | not significant |
| 4793 | GO_REGULATION_OF_TRANSCRIPTION_INITIATION_FROM_RNA_POLYME   | -1.10 | 0.49 | 0 | 0 | 0 | not significant |
| 4794 | GO_REGULATION_OF_VACUOLE_ORGANIZATION                       | -1.10 | 0.49 | 0 | 0 | 0 | not significant |
| 4795 | GRÜNBAUM_E2A_TARGETS_DN                                     | -1.10 | 0.49 | 0 | 0 | 0 | not significant |
| 4796 | REACTOME_REGULATION_OF_BETA_CELL_DEVELOPMENT                | -1.10 | 0.49 | 0 | 0 | 0 | not significant |
| 4797 | WEIGEL_OXIDATIVE_STRESS_BY_TBH_AND_H2O2                     | -1.10 | 0.49 | 0 | 0 | 0 | not significant |
| 4798 | GO_CYSSTEINE_TYPE_ENDOPEPTIDASE_ACTIVATOR_ACTIVITY_INVOLVEI | -1.10 | 0.48 | 0 | 0 | 0 | not significant |
| 4799 | GO_POSITIVE_REGULATION_OF_CAMP_MEDIATED_SIGNALING           | -1.10 | 0.48 | 0 | 0 | 0 | not significant |
| 4800 | GO_TELENCEPHALON_GLIAL_CELL_MIGRATION                       | -1.10 | 0.48 | 0 | 0 | 0 | not significant |
| 4801 | TRAYNOR_RETT_SYNDROM_DN                                     | -1.10 | 0.48 | 0 | 0 | 0 | not significant |
| 4802 | VERNELL_RETINOBLASTOMA_PATHWAY_DN                           | -1.10 | 0.48 | 0 | 0 | 0 | not significant |
| 4803 | BARRIER_CANCER_RELAPSE_TUMOR_SAMPLE_UP                      | -1.10 | 0.47 | 0 | 0 | 0 | not significant |
| 4804 | CHR1Q43                                                     | -1.10 | 0.47 | 0 | 0 | 0 | not significant |
| 4805 | GO_ADRENAL_GLAND_DEVELOPMENT                                | -1.10 | 0.47 | 0 | 0 | 0 | not significant |
| 4806 | GO_ASTROCYTE_ACTIVATION                                     | -1.10 | 0.47 | 0 | 0 | 0 | not significant |
| 4807 | GO_CELL_CELL_SIGNALING_INVOLVED_IN_CARDIAC_CONDUCTION       | -1.10 | 0.47 | 0 | 0 | 0 | not significant |
| 4808 | GO_POLARIZED_EPITHELIAL_CELL_DIFFERENTIATION                | -1.10 | 0.47 | 0 | 0 | 0 | not significant |
| 4809 | GO_PROTEIN_FOLDING_CHAPERONE                                | -1.10 | 0.47 | 0 | 0 | 0 | not significant |
| 4810 | GO_RESPONSE_TO_FOOD                                         | -1.10 | 0.47 | 0 | 0 | 0 | not significant |
| 4811 | TANG_SENESCENCE_TP53_TARGETS_UP                             | -1.10 | 0.47 | 0 | 0 | 0 | not significant |
| 4812 | WALLACE_PROSTATE_CANCER_UP                                  | -1.10 | 0.47 | 0 | 0 | 0 | not significant |
| 4813 | BIOCARTA_EPONFKB_PATHWAY                                    | -1.10 | 0.46 | 0 | 0 | 0 | not significant |
| 4814 | GHO_ATF5_TARGETS_UP                                         | -1.10 | 0.46 | 0 | 0 | 0 | not significant |
| 4815 | GO_GLIAL_CELL_MIGRATION                                     | -1.10 | 0.46 | 0 | 0 | 0 | not significant |
| 4816 | GO_RESPONSE_TO_INACTIVITY                                   | -1.10 | 0.46 | 0 | 0 | 0 | not significant |
| 4817 | GO_RNA_CAP_BINDING                                          | -1.10 | 0.46 | 0 | 0 | 0 | not significant |
| 4818 | NELSON_RESPONSE_TO_ANDROGEN_DN                              | -1.10 | 0.46 | 0 | 0 | 0 | not significant |
| 4819 | RAMPON_ENRICHED_LEARNING_ENVIRONMENT_EARLY_UP               | -1.10 | 0.46 | 0 | 0 | 0 | not significant |
| 4820 | GO_CARDIAC_CONDUCTION_SYSTEM_DEVELOPMENT                    | -1.10 | 0.45 | 0 | 0 | 0 | not significant |
| 4821 | GO_MATING                                                   | -1.10 | 0.45 | 0 | 0 | 0 | not significant |
| 4822 | GO_NUCLEOTIDE_TRANSMEMBRANE_TRANSPORTER_ACTIVITY            | -1.10 | 0.45 | 0 | 0 | 0 | not significant |
| 4823 | GO_REGULATION_OF_CAMP_DEPENDENT_PROTEIN_KINASE_ACTIVITY     | -1.10 | 0.45 | 0 | 0 | 0 | not significant |
| 4824 | CHR13Q31                                                    | -1.10 | 0.44 | 0 | 0 | 0 | not significant |
| 4825 | GO_1_PHOSPHATIDYLINOSITOL_3_KINASE_REGULATOR_ACTIVITY       | -1.10 | 0.44 | 0 | 0 | 0 | not significant |
| 4826 | GO_2_OXOGLUTARATE_METABOLIC_PROCESS                         | -1.10 | 0.44 | 0 | 0 | 0 | not significant |
| 4827 | GO_DICARBOXYLIC_ACID_TRANSMEMBRANE_TRANSPORTER_ACTIVITY     | -1.10 | 0.44 | 0 | 0 | 0 | not significant |
| 4828 | GO_DNA_UNWINDING_INVOLVED_IN_DNA_REPLICATION                | -1.10 | 0.44 | 0 | 0 | 0 | not significant |
| 4829 | GO_POSITIVE_REGULATION_OF_OLIGODENDROCYTE_DIFFERENTIATION   | -1.10 | 0.44 | 0 | 0 | 0 | not significant |
| 4830 | GO_POSITIVE_REGULATION_OF_PROTEIN_DEPOLYMERIZATION          | -1.10 | 0.44 | 0 | 0 | 0 | not significant |
| 4831 | GO_REGULATION_OF_HISTONE_H4_K16_ACETYLIATION                | -1.10 | 0.44 | 0 | 0 | 0 | not significant |
| 4832 | GO_MODULATION_OF_AGE_RELATED_BEHAVIORAL_DECLINE             | -1.10 | 0.43 | 0 | 0 | 0 | not significant |
| 4833 | GO_REGULATION_OF_PSEUDOPODIUM_ASSEMBLY                      | -1.10 | 0.43 | 0 | 0 | 0 | not significant |
| 4834 | LUI_THYROID_CANCER_CLUSTER_5                                | -1.10 | 0.42 | 0 | 0 | 0 | not significant |
| 4835 | GO_DENSE_CORE_GRANULE_TRANSPORT                             | -1.10 | 0.40 | 0 | 0 | 0 | not significant |
| 4836 | GO_CYTOSKELETAL_PART                                        | -1.09 | 1.27 | 0 | 0 | 0 | not significant |
| 4837 | GO_CHROMOSOME                                               | -1.09 | 1.05 | 0 | 0 | 0 | not significant |
| 4838 | GO_MODIFICATION_DEPENDENT_MACROMOLECULE_CATABOLIC_PROCI     | -1.09 | 0.92 | 0 | 0 | 0 | not significant |
| 4839 | HSIAO_HOUSEKEEPING_GENES                                    | -1.09 | 0.82 | 0 | 0 | 0 | not significant |
| 4840 | MARTORIATI_MDM4_TARGETS_FETAL_LIVER_DN                      | -1.09 | 0.77 | 0 | 0 | 0 | not significant |
| 4841 | GO_ENDOCYTOSIS                                              | -1.09 | 0.76 | 0 | 0 | 0 | not significant |
| 4842 | DELACROIX_RAR_BOUND_ES                                      | -1.09 | 0.75 | 0 | 0 | 0 | not significant |
| 4843 | FISCHER_DIRECT_P53_TARGETS_META_ANALYSIS                    | -1.09 | 0.73 | 0 | 0 | 0 | not significant |
| 4844 | GO_POSITIVE_REGULATION_OF_CELLULAR_COMPONENT_BIOGENESIS     | -1.09 | 0.73 | 0 | 0 | 0 | not significant |
| 4845 | GO_MAINTENANCE_OF_LOCATION                                  | -1.09 | 0.69 | 0 | 0 | 0 | not significant |
| 4846 | GO_REGULATION_OF_HORMONE_LEVELS                             | -1.09 | 0.68 | 0 | 0 | 0 | not significant |
| 4847 | GO_CHROMOSOME_TELOMERIC_REGION                              | -1.09 | 0.64 | 0 | 0 | 0 | not significant |
| 4848 | CHR1P34                                                     | -1.09 | 0.61 | 0 | 0 | 0 | not significant |
| 4849 | GO_ORGANIC_ANION_TRANSMEMBRANE_TRANSPORTER_ACTIVITY         | -1.09 | 0.61 | 0 | 0 | 0 | not significant |
| 4850 | SENESE_HDAC1_AND_HDAC2_TARGETS_UP                           | -1.09 | 0.61 | 0 | 0 | 0 | not significant |
| 4851 | KAAB_HEART_ATRIUM_VS_VENTRICLE_UP                           | -1.09 | 0.59 | 0 | 0 | 0 | not significant |
| 4852 | NOTCH_DNV1_DN                                               | -1.09 | 0.58 | 0 | 0 | 0 | not significant |
| 4853 | GO_RESPONSE_TO_HYDROGEN_PEROXIDE                            | -1.09 | 0.55 | 0 | 0 | 0 | not significant |
| 4854 | GO_RNA_HELICASE_ACTIVITY                                    | -1.09 | 0.55 | 0 | 0 | 0 | not significant |
| 4855 | REACTOME_TRANSCRIPTIONAL_REGULATION_OF_GRANULOPOIESIS       | -1.09 | 0.55 | 0 | 0 | 0 | not significant |
| 4856 | KEGG_NATURAL_KILLER_CELL_MEDIATED_CYTOTOXICITY              | -1.09 | 0.54 | 0 | 0 | 0 | not significant |
| 4857 | CYCLIN_D1_KE_V1_DN                                          | -1.09 | 0.53 | 0 | 0 | 0 | not significant |
| 4858 | GO_POSITIVE_REGULATION_OF_ENDOTHELIAL_CELL_MIGRATION        | -1.09 | 0.53 | 0 | 0 | 0 | not significant |
| 4859 | GO_POSITIVE_REGULATION_OF_MYELOID_LEUKOCYTE_DIFFERENTIATI   | -1.09 | 0.52 | 0 | 0 | 0 | not significant |
| 4860 | GO_REGULATION_OF_HEART_RATE                                 | -1.09 | 0.52 | 0 | 0 | 0 | not significant |
| 4861 | GO_REGULATION_OF_RELEASE_OF_SEQUESTERED_CALCIIUM_IION_INT   | -1.09 | 0.52 | 0 | 0 | 0 | not significant |
| 4862 | SESTO_RESPONSE_TO_UV_C5                                     | -1.09 | 0.52 | 0 | 0 | 0 | not significant |
| 4863 | CHR15Q25                                                    | -1.09 | 0.51 | 0 | 0 | 0 | not significant |
| 4864 | GO_NLS_BEARING_PROTEIN_IMPORT_INTO_NUCLEUS                  | -1.09 | 0.51 | 0 | 0 | 0 | not significant |
| 4865 | GO_SENSORY_PERCEPTION_OF_MECHANICAL_STIMULUS                | -1.09 | 0.51 | 0 | 0 | 0 | not significant |
| 4866 | HALLMARK_COAGULATION                                        | -1.09 | 0.51 | 0 | 0 | 0 | not significant |
| 4867 | CHR5Q13                                                     | -1.09 | 0.50 | 0 | 0 | 0 | not significant |
| 4868 | GO_MRNA_CLEAVAGE                                            | -1.09 | 0.50 | 0 | 0 | 0 | not significant |
| 4869 | GO_POSITIVE_REGULATION_OF_SMOOTH_MUSCLE_CELL_PROLIFERATI    | -1.09 | 0.50 | 0 | 0 | 0 | not significant |
| 4870 | GO_RIBONUCLEOSIDE_TRIPHOSPHATE_BIOSYNTHETIC_PROCESS         | -1.09 | 0.50 | 0 | 0 | 0 | not significant |
| 4871 | GO_CARBOHYDRATE_DERIVATIVE_TRANSPORT                        | -1.09 | 0.49 | 0 | 0 | 0 | not significant |
| 4872 | GO_ENDOSOME_LUMEN                                           | -1.09 | 0.49 | 0 | 0 | 0 | not significant |
| 4873 | GO_INTERLEUKIN_1_SECRETION                                  | -1.09 | 0.49 | 0 | 0 | 0 | not significant |
| 4874 | GO_MULTICELLULAR_ORGANISMAL_MOVEMENT                        | -1.09 | 0.49 | 0 | 0 | 0 | not significant |
| 4875 | GO_NEGATIVE_REGULATION_OF_EPITHELIAL_CELL_MIGRATION         | -1.09 | 0.49 | 0 | 0 | 0 | not significant |
| 4876 | GO_SULFUR_COMPOUND_TRANSMEMBRANE_TRANSPORTER_ACTIVITY       | -1.09 | 0.49 | 0 | 0 | 0 | not significant |
| 4877 | JECHLINGER_EPITHELIAL_TO_MESENCHYMAL_TRANSITION_DN          | -1.09 | 0.49 | 0 | 0 | 0 | not significant |
| 4878 | LANDIS_BREAST_CANCER_PROGRESSION_DN                         | -1.09 | 0.49 | 0 | 0 | 0 | not significant |
| 4879 | BANDRÉS_RESPONSE_TO_CARMUSTIN_MGMT_24HR_DN                  | -1.09 | 0.48 | 0 | 0 | 0 | not significant |
| 4880 | GO_ANION_HOMEOSTASIS                                        | -1.09 | 0.48 | 0 | 0 | 0 | not significant |
| 4881 | GO_ISOPRENOID_BIOSYNTHETIC_PROCESS                          | -1.09 | 0.48 | 0 | 0 | 0 | not significant |
| 4882 | GO_PRIMARY_ALCOHOL_METABOLIC_PROCESS                        | -1.09 | 0.48 | 0 | 0 | 0 | not significant |
| 4883 | GO_REGULATION_OF_GOLGI_ORGANIZATION                         | -1.09 | 0.48 | 0 | 0 | 0 | not significant |
| 4884 | GO_AMINO_SUGAR_METABOLIC_PROCESS                            | -1.09 | 0.47 | 0 | 0 | 0 | not significant |
| 4885 | GO_NADPH_BINDING                                            | -1.09 | 0.47 | 0 | 0 | 0 | not significant |
| 4886 | GO_RESPONSE_TO_ARSENIC_CONTAINING_SUBSTANCE                 | -1.09 | 0.47 | 0 | 0 | 0 | not significant |
| 4887 | GO_THIOLESTER_HYDROLASE_ACTIVITY                            | -1.09 | 0.47 | 0 | 0 | 0 | not significant |
| 4888 | HAHTOLA_CTCL_CUTANEOUS                                      | -1.09 | 0.47 | 0 | 0 | 0 | not significant |
| 4889 | GO_AMYLOID_FIBRIL_FORMATION                                 | -1.09 | 0.46 | 0 | 0 | 0 | not significant |
| 4890 | GO_NEGATIVE_REGULATION_OF_CD4_POSITIVE_ALPHA_BETA_T_CELL_   | -1.09 | 0.46 | 0 | 0 | 0 | not significant |
| 4891 | GO_NUCLEOTIDE_TRANSPORT                                     | -1.09 | 0.46 | 0 | 0 | 0 | not significant |
| 4892 | TERAMOTO_OPN_TARGETS_CLUSTER_7                              | -1.09 | 0.46 | 0 | 0 | 0 | not significant |
| 4893 | BIOCARTA_IL17_PATHWAY                                       | -1.09 | 0.45 | 0 | 0 | 0 | not significant |

|      |                                                            |       |      |   |   |   |                 |
|------|------------------------------------------------------------|-------|------|---|---|---|-----------------|
| 4894 | BIOCARTA_TRKA_PATHWAY                                      | -1.09 | 0.45 | 0 | 0 | 0 | not significant |
| 4895 | GO_FATTY_ACID_ELONGATION                                   | -1.09 | 0.45 | 0 | 0 | 0 | not significant |
| 4896 | GO_NEGATIVE_REGULATION_OF_PROTEIN_LOCALIZATION_TO_NUCLEUS  | -1.09 | 0.45 | 0 | 0 | 0 | not significant |
| 4897 | GO_STRIATED_MUSCLE_CELL_APOPTOTIC_PROCESS                  | -1.09 | 0.45 | 0 | 0 | 0 | not significant |
| 4898 | GO_ANTIGEN_PROCESSING_AND_PRESENTATION_OF_EXOGENOUS_PEP    | -1.09 | 0.44 | 0 | 0 | 0 | not significant |
| 4899 | GO_MODULATION_BY_HOST_OF_VIRAL_GENOME_REPLICATION          | -1.09 | 0.44 | 0 | 0 | 0 | not significant |
| 4900 | GO_NADP_RETINOL_DEHYDROGENASE_ACTIVITY                     | -1.09 | 0.44 | 0 | 0 | 0 | not significant |
| 4901 | GO_NEGATIVE_REGULATION_OF_ATPASE_ACTIVITY                  | -1.09 | 0.44 | 0 | 0 | 0 | not significant |
| 4902 | RICKMAN_HEAD_AND_NECK_CANCER_E                             | -1.09 | 0.44 | 0 | 0 | 0 | not significant |
| 4903 | GO_ACROSOME_ASSEMBLY                                       | -1.09 | 0.43 | 0 | 0 | 0 | not significant |
| 4904 | GO_CAMP_DEPENDENT_PROTEIN_KINASE_ACTIVITY                  | -1.09 | 0.43 | 0 | 0 | 0 | not significant |
| 4905 | GO_MITOCHONDRIAL_RIBOSOME_ASSEMBLY                         | -1.09 | 0.43 | 0 | 0 | 0 | not significant |
| 4906 | GO_MYOFILAMENT                                             | -1.09 | 0.43 | 0 | 0 | 0 | not significant |
| 4907 | GO_TELENCEPHALON_REGIONALIZATION                           | -1.09 | 0.43 | 0 | 0 | 0 | not significant |
| 4908 | REACTOME_ACETYLCHOLINE_NEUROTRANSMITTER_RELEASE_CYCLE      | -1.09 | 0.43 | 0 | 0 | 0 | not significant |
| 4909 | REACTOME_RHO_GTPASES_ACTIVATE_KTN1                         | -1.09 | 0.43 | 0 | 0 | 0 | not significant |
| 4910 | REACTOME_SLRP_DEPENDENT_PROCESSING_OF_REPLICATION_DEPEN    | -1.09 | 0.43 | 0 | 0 | 0 | not significant |
| 4911 | WILLIAMS_ESR2_TARGETS_UP                                   | -1.09 | 0.43 | 0 | 0 | 0 | not significant |
| 4912 | GO_PEPTIDYL_HISTIDINE_MODIFICATION                         | -1.09 | 0.42 | 0 | 0 | 0 | not significant |
| 4913 | GO_SERINE_TYPE_CARBOXYPEPTIDASE_ACTIVITY                   | -1.09 | 0.42 | 0 | 0 | 0 | not significant |
| 4914 | NIELSEN_LEIOMYOSARCOMA_CN1N_UP                             | -1.09 | 0.42 | 0 | 0 | 0 | not significant |
| 4915 | GO_POSTSYNAPTIC_SIGNAL_TRANSDUCTION                        | -1.09 | 0.41 | 0 | 0 | 0 | not significant |
| 4916 | GO_PERIPHERAL_NERVOUS_SYSTEM_MYELIN_MAINTENANCE            | -1.09 | 0.40 | 0 | 0 | 0 | not significant |
| 4917 | GO_EXTRACELLULAR_MATRIX_CONSTITUENT_SECRETION              | -1.09 | 0.39 | 0 | 0 | 0 | not significant |
| 4918 | DACOSTA_UV_RESPONSE_VIA_ERCC3_DN                           | -1.08 | 1.01 | 0 | 0 | 0 | not significant |
| 4919 | REACTOME_DEVELOPMENTAL_BIOLOGY                             | -1.08 | 0.88 | 0 | 0 | 0 | not significant |
| 4920 | GO_RESPONSE_TO_GROWTH_FACTOR                               | -1.08 | 0.84 | 0 | 0 | 0 | not significant |
| 4921 | GO_TRANSPORTER_ACTIVITY                                    | -1.08 | 0.83 | 0 | 0 | 0 | not significant |
| 4922 | GO_APOPTOTIC_SIGNALING_PATHWAY                             | -1.08 | 0.76 | 0 | 0 | 0 | not significant |
| 4923 | GO_CELL_CELL_ADHESION                                      | -1.08 | 0.72 | 0 | 0 | 0 | not significant |
| 4924 | GO_NEGATIVE_REGULATION_OF_HYDROLASE_ACTIVITY               | -1.08 | 0.68 | 0 | 0 | 0 | not significant |
| 4925 | SANSOM_APC_TARGETS_DN                                      | -1.08 | 0.68 | 0 | 0 | 0 | not significant |
| 4926 | GO_NEGATIVE_REGULATION_OF_APOPTOTIC_SIGNALING_PATHWAY      | -1.08 | 0.65 | 0 | 0 | 0 | not significant |
| 4927 | GO_NEGATIVE_REGULATION_OF_LOCOMOTION                       | -1.08 | 0.64 | 0 | 0 | 0 | not significant |
| 4928 | GO_NEGATIVE_REGULATION_OF_TRANSFERASE_ACTIVITY             | -1.08 | 0.63 | 0 | 0 | 0 | not significant |
| 4929 | GO_MONOVALENT_INORGANIC_CATION_TRANSMEMBRANE_TRANSPORT     | -1.08 | 0.62 | 0 | 0 | 0 | not significant |
| 4930 | GO_REGULATION_OF_PROTEIN_MODIFICATION_BY_SMALL_PROTEIN_CC  | -1.08 | 0.60 | 0 | 0 | 0 | not significant |
| 4931 | SANSOM_APC_MYC_TARGETS                                     | -1.08 | 0.60 | 0 | 0 | 0 | not significant |
| 4932 | GO_RESPONSE_TO_IONIZING_RADIATION                          | -1.08 | 0.59 | 0 | 0 | 0 | not significant |
| 4933 | GCNP_SHH_UP_LATE.V1_DN                                     | -1.08 | 0.57 | 0 | 0 | 0 | not significant |
| 4934 | GO_KINASE_REGULATOR_ACTIVITY                               | -1.08 | 0.57 | 0 | 0 | 0 | not significant |
| 4935 | MANALO_HYPOXIA_UP                                          | -1.08 | 0.55 | 0 | 0 | 0 | not significant |
| 4936 | REACTOME_NEUROTRANSMITTER_RECEPTORS_AND_POSTSYNAPTIC_S     | -1.08 | 0.55 | 0 | 0 | 0 | not significant |
| 4937 | GO_PROTEIN_DNA_COMPLEX                                     | -1.08 | 0.54 | 0 | 0 | 0 | not significant |
| 4938 | GRABARCZYK_BCL11B_TARGETS_DN                               | -1.08 | 0.54 | 0 | 0 | 0 | not significant |
| 4939 | JAEGER_METASTASIS_DN                                       | -1.08 | 0.54 | 0 | 0 | 0 | not significant |
| 4940 | NAKAMURA_ADIPOGENESIS_LATE_UP                              | -1.08 | 0.54 | 0 | 0 | 0 | not significant |
| 4941 | REACTOME_SLC_TRANSPORTER_DISORDERS                         | -1.08 | 0.54 | 0 | 0 | 0 | not significant |
| 4942 | AKL_HTLV1_INFECTION_DN                                     | -1.08 | 0.53 | 0 | 0 | 0 | not significant |
| 4943 | PURBEY_TARGETS_OF_CTBP1_AND_SATB1_UP                       | -1.08 | 0.53 | 0 | 0 | 0 | not significant |
| 4944 | AMUNDSON_GENOTOXIC_SIGNATURE                               | -1.08 | 0.52 | 0 | 0 | 0 | not significant |
| 4945 | GO_RIBOSOME_ASSEMBLY                                       | -1.08 | 0.52 | 0 | 0 | 0 | not significant |
| 4946 | GO_HORMONE_METABOLIC_PROCESS                               | -1.08 | 0.51 | 0 | 0 | 0 | not significant |
| 4947 | GO_PLASMA_MEMBRANE_ORGANIZATION                            | -1.08 | 0.51 | 0 | 0 | 0 | not significant |
| 4948 | GO_POSITIVE_REGULATION_OF_ERK1_AND_ERK2_CASCADE            | -1.08 | 0.51 | 0 | 0 | 0 | not significant |
| 4949 | GO_MULTI_ORGANISM_CELLULAR_PROCESS                         | -1.08 | 0.50 | 0 | 0 | 0 | not significant |
| 4950 | GO_MYELOID_LEUKOCYTE_MIGRATION                             | -1.08 | 0.50 | 0 | 0 | 0 | not significant |
| 4951 | GO_POSITIVE_REGULATION_OF_DNA_BIOSYNTHETIC_PROCESS         | -1.08 | 0.50 | 0 | 0 | 0 | not significant |
| 4952 | GO_REGULATION_OF_AUTOPHAGOSOME_ASSEMBLY                    | -1.08 | 0.50 | 0 | 0 | 0 | not significant |
| 4953 | HELLEBREKERS_SILENCED_DURING_TUMOR_ANGIOGENESIS            | -1.08 | 0.50 | 0 | 0 | 0 | not significant |
| 4954 | REACTOME_MTOR_SIGNALING                                    | -1.08 | 0.50 | 0 | 0 | 0 | not significant |
| 4955 | REACTOME_TGF_BETA_RECEPTOR_SIGNALING_ACTIVATES_SMADS       | -1.08 | 0.50 | 0 | 0 | 0 | not significant |
| 4956 | CHR2Q35                                                    | -1.08 | 0.49 | 0 | 0 | 0 | not significant |
| 4957 | GO_ENDORIBONUCLEASE_ACTIVITY_PRODUCING_5_PHOSPHOMONOEST    | -1.08 | 0.49 | 0 | 0 | 0 | not significant |
| 4958 | GO_NEGATIVE_REGULATION_OF_INTRINSIC_APOPTOTIC_SIGNALING_PA | -1.08 | 0.49 | 0 | 0 | 0 | not significant |
| 4959 | GO_POSITIVE_REGULATION_OF_CYCLIN_DEPENDENT_PROTEIN_KINASE  | -1.08 | 0.49 | 0 | 0 | 0 | not significant |
| 4960 | GO_CYSSTEINE_TYPE_ENDOPEPTIDASE_REGULATOR_ACTIVITY_INVOLVE | -1.08 | 0.48 | 0 | 0 | 0 | not significant |
| 4961 | GO_EXTRACELLULAR_MATRIX_DISASSEMBLY                        | -1.08 | 0.48 | 0 | 0 | 0 | not significant |
| 4962 | GO_INTERLEUKIN_1_BETA_SECRETION                            | -1.08 | 0.48 | 0 | 0 | 0 | not significant |
| 4963 | LEE_LIVER_CANCER_DENA_DN                                   | -1.08 | 0.48 | 0 | 0 | 0 | not significant |
| 4964 | SHAFFER_IRF4_TARGETS_IN_ACTIVATED_DENDRITIC_CELL           | -1.08 | 0.48 | 0 | 0 | 0 | not significant |
| 4965 | GO_CARBOXY_LYASE_ACTIVITY                                  | -1.08 | 0.47 | 0 | 0 | 0 | not significant |
| 4966 | GO_CELL_CELL_ADHESION_MEDIATOR_ACTIVITY                    | -1.08 | 0.47 | 0 | 0 | 0 | not significant |
| 4967 | GO_DEFENSE_RESPONSE_TO_GRAM_POSITIVE_BACTERIUM             | -1.08 | 0.47 | 0 | 0 | 0 | not significant |
| 4968 | GO_REGULATION_OF_KERATINOCYTE_DIFFERENTIATION              | -1.08 | 0.47 | 0 | 0 | 0 | not significant |
| 4969 | LEE_METASTASIS_AND_ALTERNATIVE_SPLICING_DN                 | -1.08 | 0.47 | 0 | 0 | 0 | not significant |
| 4970 | REACTOME_GLYCOXYLATE_METABOLISM_AND_GLYCINE_DEGRADATION    | -1.08 | 0.47 | 0 | 0 | 0 | not significant |
| 4971 | YU_BAP1_TARGETS                                            | -1.08 | 0.47 | 0 | 0 | 0 | not significant |
| 4972 | BIOCARTA_STRESS_PATHWAY                                    | -1.08 | 0.46 | 0 | 0 | 0 | not significant |
| 4973 | GO_MATERNAL_PLACENTA_DEVELOPMENT                           | -1.08 | 0.46 | 0 | 0 | 0 | not significant |
| 4974 | GO_NEGATIVE_REGULATION_OF_CALCIUM_ION_TRANSMEMBRANE_TRAI   | -1.08 | 0.46 | 0 | 0 | 0 | not significant |
| 4975 | GO_OXIDATIVE_DEMETHYLATION                                 | -1.08 | 0.46 | 0 | 0 | 0 | not significant |
| 4976 | MYLLYKANGAS_AMPLIFICATION_HOT_SPOT_17                      | -1.08 | 0.46 | 0 | 0 | 0 | not significant |
| 4977 | REACTOME_PEPTIDE_HORMONE_METABOLISM                        | -1.08 | 0.46 | 0 | 0 | 0 | not significant |
| 4978 | GO_CEREBELLAR_PURKINJE_CELL_LAYER_DEVELOPMENT              | -1.08 | 0.45 | 0 | 0 | 0 | not significant |
| 4979 | GO_RNA_INTERFERENCE                                        | -1.08 | 0.45 | 0 | 0 | 0 | not significant |
| 4980 | GO_TELOMERE_CAP_COMPLEX                                    | -1.08 | 0.45 | 0 | 0 | 0 | not significant |
| 4981 | REACTOME_MTORC1_MEDIATED_SIGNALING                         | -1.08 | 0.45 | 0 | 0 | 0 | not significant |
| 4982 | REACTOME_PHOSPHORYLATION_OF_CD3_AND_TCR_ZETA_CHAINS        | -1.08 | 0.45 | 0 | 0 | 0 | not significant |
| 4983 | CAVARD_LIVER_CANCER_MALIGNANT_VS_BENIGN                    | -1.08 | 0.44 | 0 | 0 | 0 | not significant |
| 4984 | GO_CILIARY_TRANSITION_FIBER                                | -1.08 | 0.44 | 0 | 0 | 0 | not significant |
| 4985 | GO_POSITIVE_REGULATION_OF_TRANSCRIPTION_FROM_RNA_POLYMEF   | -1.08 | 0.44 | 0 | 0 | 0 | not significant |
| 4986 | GO_REGULATION_OF_CELL_GROWTH_INVOLVED_IN_CARDIAC_MUSCLE    | -1.08 | 0.44 | 0 | 0 | 0 | not significant |
| 4987 | KIM_GLI2_TARGETS_UP                                        | -1.08 | 0.44 | 0 | 0 | 0 | not significant |
| 4988 | REACTOME_PLATELET_SENSITIZATION_BY_LDL                     | -1.08 | 0.44 | 0 | 0 | 0 | not significant |
| 4989 | WEST_ADRENOCORITICAL_CARCIOMA_VS_ADENOMA_UP                | -1.08 | 0.44 | 0 | 0 | 0 | not significant |
| 4990 | GO_EPITHELIAL_CELL_MATURATION                              | -1.08 | 0.43 | 0 | 0 | 0 | not significant |
| 4991 | GO_RETINOID_X_RECEPTOR_BINDING                             | -1.08 | 0.43 | 0 | 0 | 0 | not significant |
| 4992 | GO_SAGA_COMPLEX                                            | -1.08 | 0.43 | 0 | 0 | 0 | not significant |
| 4993 | GO_U7_SNRNP                                                | -1.08 | 0.43 | 0 | 0 | 0 | not significant |
| 4994 | REACTOME_REGULATED_NECROSIS                                | -1.08 | 0.43 | 0 | 0 | 0 | not significant |
| 4995 | GO_CYCLIC_NUCLEOTIDE_DEPENDENT_PROTEIN_KINASE_ACTIVITY     | -1.08 | 0.42 | 0 | 0 | 0 | not significant |
| 4996 | GO_NEDD8_SPECIFIC_PROTEASE_ACTIVITY                        | -1.08 | 0.42 | 0 | 0 | 0 | not significant |
| 4997 | GO_PLATELET_DENSE_TUBULAR_NETWORK                          | -1.08 | 0.42 | 0 | 0 | 0 | not significant |
| 4998 | GO_RECEPTOR_RECYCLING                                      | -1.08 | 0.42 | 0 | 0 | 0 | not significant |
| 4999 | REACTOME_ESTROGEN_STIMULATED_SIGNALING_THROUGH_PRKCZ       | -1.08 | 0.42 | 0 | 0 | 0 | not significant |
| 5000 | GO_POSITIVE_REGULATION_OF_GLIAL_CELL_MIGRATION             | -1.08 | 0.41 | 0 | 0 | 0 | not significant |
| 5001 | HASINA_NOL7_TARGETS_DN                                     | -1.08 | 0.41 | 0 | 0 | 0 | not significant |
| 5002 | GO_GALACTOSE_CATABOLIC_PROCESS                             | -1.08 | 0.40 | 0 | 0 | 0 | not significant |

|      |                                                            |       |      |   |   |   |                 |
|------|------------------------------------------------------------|-------|------|---|---|---|-----------------|
| 5003 | GO POSITIVE REGULATION OF CHEMOKINE C X C MOTIF LIGAND 2 I | -1.08 | 0.40 | 0 | 0 | 0 | not significant |
| 5004 | REACTOME_RUNX1_REGULATES_TRANSCRIPTION_OF_GENES_INVOLVEI   | -1.08 | 0.40 | 0 | 0 | 0 | not significant |
| 5005 | GO_REGULATION_OF_KETONE_BIOSYNTHETIC_PROCESS               | -1.08 | 0.39 | 0 | 0 | 0 | not significant |
| 5006 | BYSTRYKH_HEMATOPOIESIS_STEM_CELL_QTL_TRANS                 | -1.07 | 0.81 | 0 | 0 | 0 | not significant |
| 5007 | GO_NUCLEAR_CHROMOSOME                                      | -1.07 | 0.74 | 0 | 0 | 0 | not significant |
| 5008 | BAELOE_DIABETIC_NEPHROPATHY_DN                             | -1.07 | 0.70 | 0 | 0 | 0 | not significant |
| 5009 | SCHAEFFER_PROSTATE_DEVELOPMENT_6HR_DN                      | -1.07 | 0.67 | 0 | 0 | 0 | not significant |
| 5010 | SENESE_HDAC3_TARGETS_DN                                    | -1.07 | 0.63 | 0 | 0 | 0 | not significant |
| 5011 | GO_REGULATION_OF_DNA_METABOLIC_PROCESS                     | -1.07 | 0.59 | 0 | 0 | 0 | not significant |
| 5012 | GO_CELLULAR_RESPONSE_TO_PEPTIDE_HORMONE_STIMULUS           | -1.07 | 0.58 | 0 | 0 | 0 | not significant |
| 5013 | GO_NUCLEOSIDE_TRIPHOSPHATASE_REGULATOR_ACTIVITY            | -1.07 | 0.58 | 0 | 0 | 0 | not significant |
| 5014 | MOREAUX_MULTIPLE_MYELOMA_BY_TACI_UP                        | -1.07 | 0.58 | 0 | 0 | 0 | not significant |
| 5015 | GO_ENDOPEPTIDASE_ACTIVITY                                  | -1.07 | 0.57 | 0 | 0 | 0 | not significant |
| 5016 | GO_NEGATIVE_REGULATION_OF_CELLULAR_CATABOLIC_PROCESS       | -1.07 | 0.56 | 0 | 0 | 0 | not significant |
| 5017 | GO_POSITIVE_REGULATION_OF_DNA_METABOLIC_PROCESS            | -1.07 | 0.56 | 0 | 0 | 0 | not significant |
| 5018 | ERBB2_UP.V1_UP                                             | -1.07 | 0.55 | 0 | 0 | 0 | not significant |
| 5019 | GO_NEGATIVE_REGULATION_OF_CELL_DEVELOPMENT                 | -1.07 | 0.55 | 0 | 0 | 0 | not significant |
| 5020 | REACTOME_TRANSMISSION_ACROSS_CHEMICAL_SYNAPSES             | -1.07 | 0.55 | 0 | 0 | 0 | not significant |
| 5021 | GO_CELL_CORTEX_PART                                        | -1.07 | 0.54 | 0 | 0 | 0 | not significant |
| 5022 | HALLMARK_EPITHELIAL_MESENCHYMAL_TRANSITION                 | -1.07 | 0.53 | 0 | 0 | 0 | not significant |
| 5023 | VILLANUEVA_LIVER_CANCER_KRT19_UP                           | -1.07 | 0.53 | 0 | 0 | 0 | not significant |
| 5024 | GO_CELL_KILLING                                            | -1.07 | 0.52 | 0 | 0 | 0 | not significant |
| 5025 | GO_LARGE_RIBOSOMAL_SUBUNIT                                 | -1.07 | 0.52 | 0 | 0 | 0 | not significant |
| 5026 | IKEDA_MIR133_TARGETS_UP                                    | -1.07 | 0.52 | 0 | 0 | 0 | not significant |
| 5027 | CHR2Q31                                                    | -1.07 | 0.51 | 0 | 0 | 0 | not significant |
| 5028 | GO_AMINO_ACID_TRANSMEMBRANE_TRANSPORT                      | -1.07 | 0.51 | 0 | 0 | 0 | not significant |
| 5029 | GO_NEGATIVE_REGULATION_OF_TRANSMEMBRANE_TRANSPORT          | -1.07 | 0.51 | 0 | 0 | 0 | not significant |
| 5030 | TAKEDA_TARGETS_OF_NUP98_HOX9_FUSION_8D_DN                  | -1.07 | 0.51 | 0 | 0 | 0 | not significant |
| 5031 | GO_ASTROCYTE_DIFFERENTIATION                               | -1.07 | 0.50 | 0 | 0 | 0 | not significant |
| 5032 | GO_DRUG_TRANSPORT                                          | -1.07 | 0.50 | 0 | 0 | 0 | not significant |
| 5033 | KEGG_APOPTOSIS                                             | -1.07 | 0.50 | 0 | 0 | 0 | not significant |
| 5034 | GO_PHOSPHOLIPASE_ACTIVITY                                  | -1.07 | 0.49 | 0 | 0 | 0 | not significant |
| 5035 | GO_RESPONSE_TO_VITAMIN                                     | -1.07 | 0.49 | 0 | 0 | 0 | not significant |
| 5036 | KOKKINAKIS_METHIONINE_DEPRIVATION_96HR_DN                  | -1.07 | 0.49 | 0 | 0 | 0 | not significant |
| 5037 | HINATA_NFKB_TARGETS_FIBROBLAST_UP                          | -1.07 | 0.48 | 0 | 0 | 0 | not significant |
| 5038 | KRAS.KIDNEY_UP.V1_DN                                       | -1.07 | 0.48 | 0 | 0 | 0 | not significant |
| 5039 | REACTOME_SYNTHESIS_OF_PIP3_AT_THE_PLASMA_MEMBRANE          | -1.07 | 0.48 | 0 | 0 | 0 | not significant |
| 5040 | GO_BRANCHING_MORPHOGENESIS_OF_AN_EPITHELIAL_TUBE           | -1.07 | 0.47 | 0 | 0 | 0 | not significant |
| 5041 | GO_NEUROINFLAMMATORY_RESPONSE                              | -1.07 | 0.47 | 0 | 0 | 0 | not significant |
| 5042 | GO_POSITIVE_REGULATION_OF_MUSCLE_TISSUE_DEVELOPMENT        | -1.07 | 0.47 | 0 | 0 | 0 | not significant |
| 5043 | GO_POSITIVE_REGULATION_OF_STRESS_FIBER_ASSEMBLY            | -1.07 | 0.47 | 0 | 0 | 0 | not significant |
| 5044 | BIOCARTA_AT1R_PATHWAY                                      | -1.07 | 0.46 | 0 | 0 | 0 | not significant |
| 5045 | CHR1P35                                                    | -1.07 | 0.46 | 0 | 0 | 0 | not significant |
| 5046 | GO GRANULOCYTE MIGRATION                                   | -1.07 | 0.46 | 0 | 0 | 0 | not significant |
| 5047 | GO_PHOSPHOTRANSFERASE_ACTIVITY_PHOSPHATE_GROUP_AS_ACCEI    | -1.07 | 0.46 | 0 | 0 | 0 | not significant |
| 5048 | GO_PROGRAMMED_NECROTIC_CELL_DEATH                          | -1.07 | 0.46 | 0 | 0 | 0 | not significant |
| 5049 | GO_REGULATION_OF_LYMPHOCYTE_APOPTOTIC_PROCESS              | -1.07 | 0.46 | 0 | 0 | 0 | not significant |
| 5050 | LEE_LIVER_CANCER_MYC_UP                                    | -1.07 | 0.46 | 0 | 0 | 0 | not significant |
| 5051 | LEIN_MEDULLA_MARKERS                                       | -1.07 | 0.46 | 0 | 0 | 0 | not significant |
| 5052 | REACTOME_EXTRA_NUCLEAR_ESTROGEN_SIGNALING                  | -1.07 | 0.46 | 0 | 0 | 0 | not significant |
| 5053 | ZHAN_MULTIPLE_MYELOMA_HP_DN                                | -1.07 | 0.46 | 0 | 0 | 0 | not significant |
| 5054 | GO_POSITIVE_REGULATION_OF_RESPONSE_TO_WOUNDING             | -1.07 | 0.45 | 0 | 0 | 0 | not significant |
| 5055 | PID_ANTHRAX_PATHWAY                                        | -1.07 | 0.45 | 0 | 0 | 0 | not significant |
| 5056 | REACTOME_MAPK_TARGETS_NUCLEAR_EVENTS_MEDIATED_BY_MAP_K     | -1.07 | 0.45 | 0 | 0 | 0 | not significant |
| 5057 | TOMIDA_METASTASIS_DN                                       | -1.07 | 0.45 | 0 | 0 | 0 | not significant |
| 5058 | GO_CCR4_NOT_COMPLEX                                        | -1.07 | 0.44 | 0 | 0 | 0 | not significant |
| 5059 | GO_PEPTIDASE_ACTIVATOR_ACTIVITY_INVOLVED_IN_APOPTOTIC_PRO  | -1.07 | 0.44 | 0 | 0 | 0 | not significant |
| 5060 | GO_PERK_MEDIATED_UNFOLDED_PROTEIN_RESPONSE                 | -1.07 | 0.44 | 0 | 0 | 0 | not significant |
| 5061 | GO_REGULATION_OF_SKELETAL_MUSCLE_TISSUE_DEVELOPMENT        | -1.07 | 0.44 | 0 | 0 | 0 | not significant |
| 5062 | REACTOME_APOPTOSIS_INDUCED_DNA_FRAGMENTATION               | -1.07 | 0.44 | 0 | 0 | 0 | not significant |
| 5063 | REACTOME_PLATELET_AGGREGATION_PLUG_FORMATION               | -1.07 | 0.44 | 0 | 0 | 0 | not significant |
| 5064 | REACTOME_UPTAKE_AND_FUNCTION_OF_ANTHRAX_TOXINS             | -1.07 | 0.44 | 0 | 0 | 0 | not significant |
| 5065 | XU_HGF_SIGNALING_NOT_VIA_AKT1_6HR                          | -1.07 | 0.44 | 0 | 0 | 0 | not significant |
| 5066 | CHIN_BREAST_CANCER_COPY_NUMBER_UP                          | -1.07 | 0.43 | 0 | 0 | 0 | not significant |
| 5067 | GO_LUNG_MORPHOGENESIS                                      | -1.07 | 0.43 | 0 | 0 | 0 | not significant |
| 5068 | GO_NEGATIVE_REGULATION_OF_CELL_CYCLE_ARREST                | -1.07 | 0.43 | 0 | 0 | 0 | not significant |
| 5069 | GO_REGULATION_OF_TRANSLATION_IN_RESPONSE_TO_STRESS         | -1.07 | 0.43 | 0 | 0 | 0 | not significant |
| 5070 | GO_SNRNA_BINDING                                           | -1.07 | 0.43 | 0 | 0 | 0 | not significant |
| 5071 | STREICHER_LSM1_TARGETS_DN                                  | -1.07 | 0.43 | 0 | 0 | 0 | not significant |
| 5072 | ALONSO_METASTASIS_NEURAL_UP                                | -1.07 | 0.42 | 0 | 0 | 0 | not significant |
| 5073 | BIOCARTA_CDC42RAC_PATHWAY                                  | -1.07 | 0.42 | 0 | 0 | 0 | not significant |
| 5074 | GO_ANTIGEN_PROCESSING_AND_PRESENTATION_OF_ENDOGENOUS_PE    | -1.07 | 0.42 | 0 | 0 | 0 | not significant |
| 5075 | GO_GMP_METABOLIC_PROCESS                                   | -1.07 | 0.42 | 0 | 0 | 0 | not significant |
| 5076 | GO_GOLGI_TO_LYSOSOME_TRANSPORT                             | -1.07 | 0.42 | 0 | 0 | 0 | not significant |
| 5077 | GO_NEUROTRYPHIN_TRK_RECEPTOR_SIGNALING_PATHWAY             | -1.07 | 0.42 | 0 | 0 | 0 | not significant |
| 5078 | GO_PEPTIDYL_DIPHTHAMIDE_BIOSYNTHETIC_PROCESS_FROM_PEPTIDY  | -1.07 | 0.42 | 0 | 0 | 0 | not significant |
| 5079 | GUTIERREZ_WALDENSTROMS_MACROGLOBULINEMIA_1_UP              | -1.07 | 0.42 | 0 | 0 | 0 | not significant |
| 5080 | PARK_HSC_VS_MULTIPOTENT_PROGENITORS_UP                     | -1.07 | 0.42 | 0 | 0 | 0 | not significant |
| 5081 | REACTOME_SHC_MEDIATED_CASCADE:FGFR3                        | -1.07 | 0.42 | 0 | 0 | 0 | not significant |
| 5082 | VIOTOR_IFRD1_TARGETS                                       | -1.07 | 0.42 | 0 | 0 | 0 | not significant |
| 5083 | GO_CELLULAR_RESPONSE_TO_EPINEPHRINE_STIMULUS               | -1.07 | 0.41 | 0 | 0 | 0 | not significant |
| 5084 | GO_CORNIFIED_ENVELOPE                                      | -1.07 | 0.41 | 0 | 0 | 0 | not significant |
| 5085 | GO_NONHOMOLOGOUS_END_JOINING_COMPLEX                       | -1.07 | 0.41 | 0 | 0 | 0 | not significant |
| 5086 | GO_CHLORIDE_CHANNEL_INHIBITOR_ACTIVITY                     | -1.07 | 0.40 | 0 | 0 | 0 | not significant |
| 5087 | GO_ELASTIC_FIBER_ASSEMBLY                                  | -1.07 | 0.40 | 0 | 0 | 0 | not significant |
| 5088 | GO_FATTY_ACID_SYNTHASE_ACTIVITY                            | -1.07 | 0.40 | 0 | 0 | 0 | not significant |
| 5089 | GO_G_PROTEIN_BETA_SUBUNIT_BINDING                          | -1.07 | 0.40 | 0 | 0 | 0 | not significant |
| 5090 | GO_PATTERN_RECOGNITION_RECEPTOR_ACTIVITY                   | -1.07 | 0.40 | 0 | 0 | 0 | not significant |
| 5091 | GO_POSITIVE_REGULATION_OF_HORMONE_METABOLIC_PROCESS        | -1.07 | 0.40 | 0 | 0 | 0 | not significant |
| 5092 | GO_UBIQUINONE_BINDING                                      | -1.07 | 0.40 | 0 | 0 | 0 | not significant |
| 5093 | BYSTRYKH_HEMATOPOIESIS_STEM_CELL_FLI1                      | -1.07 | 0.39 | 0 | 0 | 0 | not significant |
| 5094 | GO_PROTEIN_O_LINKED_FUCOSYLATION                           | -1.07 | 0.39 | 0 | 0 | 0 | not significant |
| 5095 | GO_REGULATION_OF_PROTEIN_LOCALIZATION_TO_CELL_CORTEX       | -1.07 | 0.39 | 0 | 0 | 0 | not significant |
| 5096 | MYLLYKANGAS_AMPLIFICATION_HOT_SPOT_13                      | -1.07 | 0.39 | 0 | 0 | 0 | not significant |
| 5097 | GO_CARNITINE_O_ACYLTRANSFERASE_ACTIVITY                    | -1.07 | 0.38 | 0 | 0 | 0 | not significant |
| 5098 | GO_REGULATION_OF ASPARTIC TYPE ENDOPEPTIDASE ACTIVITY INV  | -1.07 | 0.38 | 0 | 0 | 0 | not significant |
| 5099 | GO_REGULATION_OF_HYALURONAN_BIOSYNTHETIC_PROCESS           | -1.07 | 0.36 | 0 | 0 | 0 | not significant |
| 5100 | GO_DNA_METABOLIC_PROCESS                                   | -1.06 | 0.82 | 0 | 0 | 0 | not significant |
| 5101 | GO_REGULATION_OF_CELL_DEVELOPMENT                          | -1.06 | 0.73 | 0 | 0 | 0 | not significant |
| 5102 | GO_LIPID_METABOLIC_PROCESS                                 | -1.06 | 0.72 | 0 | 0 | 0 | not significant |
| 5103 | GO_REGULATION_OF_CELLULAR_RESPONSE_TO_STRESS               | -1.06 | 0.70 | 0 | 0 | 0 | not significant |
| 5104 | GO_PROTEIN_POLYUBIQUITINATION                              | -1.06 | 0.64 | 0 | 0 | 0 | not significant |
| 5105 | GO_REGULATION_OF_GROWTH                                    | -1.06 | 0.63 | 0 | 0 | 0 | not significant |
| 5106 | GO_PROTEIN_CATABOLIC_PROCESS                               | -1.06 | 0.62 | 0 | 0 | 0 | not significant |
| 5107 | GO_CELLULAR_RESPONSE_TO ABIOTIC_STIMULUS                   | -1.06 | 0.60 | 0 | 0 | 0 | not significant |
| 5108 | GO_RIBONUCLEOPROTEIN GRANULE                               | -1.06 | 0.58 | 0 | 0 | 0 | not significant |
| 5109 | GO_RNA_CATABOLIC_PROCESS                                   | -1.06 | 0.58 | 0 | 0 | 0 | not significant |
| 5110 | GO_LIPID_MODIFICATION                                      | -1.06 | 0.56 | 0 | 0 | 0 | not significant |
| 5111 | GO_OSSIFICATION                                            | -1.06 | 0.56 | 0 | 0 | 0 | not significant |



|      |                                                            |       |      |   |   |   |                 |
|------|------------------------------------------------------------|-------|------|---|---|---|-----------------|
| 5112 | GO_POSITIVE_REGULATION_OF_CELL_CYCLE                       | -1.06 | 0.56 | 0 | 0 | 0 | not significant |
| 5113 | GO_REGULATION_OF_VESICLE_MEDIATED_TRANSPORT                | -1.06 | 0.56 | 0 | 0 | 0 | not significant |
| 5114 | MULLIGHAN_NPM1_MUTATED_SIGNATURE_1_UP                      | -1.06 | 0.54 | 0 | 0 | 0 | not significant |
| 5115 | FUJII_YBX1_TARGETS_DN                                      | -1.06 | 0.53 | 0 | 0 | 0 | not significant |
| 5116 | GO_POSITIVE_REGULATION_OF_CHROMOSOME_ORGANIZATION          | -1.06 | 0.53 | 0 | 0 | 0 | not significant |
| 5117 | GO_REGULATION_OF_CELL_CELL_ADHESION                        | -1.06 | 0.53 | 0 | 0 | 0 | not significant |
| 5118 | STK33_DN                                                   | -1.06 | 0.53 | 0 | 0 | 0 | not significant |
| 5119 | GO_CELL_SUBSTRATE_ADHESION                                 | -1.06 | 0.52 | 0 | 0 | 0 | not significant |
| 5120 | GO_RECEPTOR_METABOLIC_PROCESS                              | -1.06 | 0.51 | 0 | 0 | 0 | not significant |
| 5121 | GO_REGULATION_OF_CELL_CYCLE_ARREST                         | -1.06 | 0.51 | 0 | 0 | 0 | not significant |
| 5122 | GO_BASOLATERAL_PLASMA_MEMBRANE                             | -1.06 | 0.50 | 0 | 0 | 0 | not significant |
| 5123 | GO_IMMUNOGLOBULIN_PRODUCTION                               | -1.06 | 0.50 | 0 | 0 | 0 | not significant |
| 5124 | PROVENZANI_METASTASIS_UP                                   | -1.06 | 0.50 | 0 | 0 | 0 | not significant |
| 5125 | GO_PRIMARY_ACTIVE_TRANSMEMBRANE_TRANSPORTER_ACTIVITY       | -1.06 | 0.48 | 0 | 0 | 0 | not significant |
| 5126 | CHAUHAN_RESPONSE_TO_METHOXYESTRADIOL_DN                    | -1.06 | 0.47 | 0 | 0 | 0 | not significant |
| 5127 | GO_ISOPRENOID_METABOLIC_PROCESS                            | -1.06 | 0.47 | 0 | 0 | 0 | not significant |
| 5128 | GO_NUCLEOTIDE_EXCISION_REPAIR_PREINCISION_COMPLEX_ASSEMBLY | -1.06 | 0.47 | 0 | 0 | 0 | not significant |
| 5129 | HALLMARK_INFLAMMATORY_RESPONSE                             | -1.06 | 0.47 | 0 | 0 | 0 | not significant |
| 5130 | IKEDA_MIR1_TARGETS_UP                                      | -1.06 | 0.46 | 0 | 0 | 0 | not significant |
| 5131 | KYNG_ENVIRONMENTAL_STRESS_RESPONSE_UP                      | -1.06 | 0.46 | 0 | 0 | 0 | not significant |
| 5132 | MORI_EMU_MYC_LYMPHOMA_BY_ONSET_TIME_UP                     | -1.06 | 0.46 | 0 | 0 | 0 | not significant |
| 5133 | WANG_PROSTATE_CANCER_ANDROGEN_INDEPENDENT                  | -1.06 | 0.46 | 0 | 0 | 0 | not significant |
| 5134 | CHESLER_BRAIN_QTL_CIS                                      | -1.06 | 0.45 | 0 | 0 | 0 | not significant |
| 5135 | GO_MITOTIC_CYTOKINESIS                                     | -1.06 | 0.45 | 0 | 0 | 0 | not significant |
| 5136 | GO_POSITIVE_REGULATION_OF_EXTRINSIC_APOPTOTIC_SIGNALING_PA | -1.06 | 0.45 | 0 | 0 | 0 | not significant |
| 5137 | GO_REGULATION_OF_MULTICELLULAR_ORGANISM_GROWTH             | -1.06 | 0.45 | 0 | 0 | 0 | not significant |
| 5138 | GO_SIGNAL_TRANSDUCTION_INVOLVED_IN_CELL_CYCLE_CHECKPOINT   | -1.06 | 0.45 | 0 | 0 | 0 | not significant |
| 5139 | KEGG_LYSINE_DEGRADATION                                    | -1.06 | 0.45 | 0 | 0 | 0 | not significant |
| 5140 | RB_P130_DN.V1_UP                                           | -1.06 | 0.45 | 0 | 0 | 0 | not significant |
| 5141 | REACTOME_RET_SIGNALING                                     | -1.06 | 0.45 | 0 | 0 | 0 | not significant |
| 5142 | REACTOME_SEMAPHORIN_INTERACTIONS                           | -1.06 | 0.45 | 0 | 0 | 0 | not significant |
| 5143 | SWEET_KRAS_TARGETS_DN                                      | -1.06 | 0.45 | 0 | 0 | 0 | not significant |
| 5144 | CHR10P15                                                   | -1.06 | 0.44 | 0 | 0 | 0 | not significant |
| 5145 | GO_REGULATION_OF_POTASSIUM_ION_TRANSPORT                   | -1.06 | 0.44 | 0 | 0 | 0 | not significant |
| 5146 | REACTOME_OTHER_SEMAPHORIN_INTERACTIONS                     | -1.06 | 0.44 | 0 | 0 | 0 | not significant |
| 5147 | TERAO_AOX4_TARGETS_SKIN_UP                                 | -1.06 | 0.44 | 0 | 0 | 0 | not significant |
| 5148 | GO_C2H2_ZINC_FINGER_DOMAIN_BINDING                         | -1.06 | 0.43 | 0 | 0 | 0 | not significant |
| 5149 | GO_POSITIVE_REGULATION_OF_GLYCOLYTIC_PROCESS               | -1.06 | 0.43 | 0 | 0 | 0 | not significant |
| 5150 | GO_REGULATION_OF_ACTOMYOSIN_STRUCTURE_ORGANIZATION         | -1.06 | 0.43 | 0 | 0 | 0 | not significant |
| 5151 | JOHANSSON_GLIOMAGENESIS_BY_PDGF_DN                         | -1.06 | 0.43 | 0 | 0 | 0 | not significant |
| 5152 | KEGG_DRUG_METABOLISM_OTHER_ENZYMES                         | -1.06 | 0.43 | 0 | 0 | 0 | not significant |
| 5153 | REACTOME_REGULATION_OF_FOXP3_TRANSCRIPTIONAL_ACTIVITY_BY_I | -1.06 | 0.43 | 0 | 0 | 0 | not significant |
| 5154 | ZHAN_V2_LATE_DIFFERENTIATION_GENES                         | -1.06 | 0.43 | 0 | 0 | 0 | not significant |
| 5155 | BIOCARTA_ACTIN_PATHWAY                                     | -1.06 | 0.42 | 0 | 0 | 0 | not significant |
| 5156 | CHEN_PDGF_TARGETS                                          | -1.06 | 0.42 | 0 | 0 | 0 | not significant |
| 5157 | CHOW_RASSF1_TARGETS_UP                                     | -1.06 | 0.42 | 0 | 0 | 0 | not significant |
| 5158 | GO_COP9_SIGNALOSOME                                        | -1.06 | 0.42 | 0 | 0 | 0 | not significant |
| 5159 | GO_DISRUPTION_OF_CELLS_OF_OTHER_ORGANISM_INVOLVED_IN_SYM   | -1.06 | 0.42 | 0 | 0 | 0 | not significant |
| 5160 | GO_NEGATIVE_REGULATION_OF_ACTIN_FILAMENT_DEPOLYMERIZATION  | -1.06 | 0.42 | 0 | 0 | 0 | not significant |
| 5161 | GO_NEUROTRANSMITTER_TRANSPORTER_ACTIVITY                   | -1.06 | 0.42 | 0 | 0 | 0 | not significant |
| 5162 | GO_PHYSIOLOGICAL_CARDIAC_MUSCLE_HYPERTROPHY                | -1.06 | 0.42 | 0 | 0 | 0 | not significant |
| 5163 | GO_POSITIVE_REGULATION_OF_MEMBRANE_POTENTIAL               | -1.06 | 0.42 | 0 | 0 | 0 | not significant |
| 5164 | GO_POSITIVE_REGULATION_OF_ORGAN_GROWTH                     | -1.06 | 0.42 | 0 | 0 | 0 | not significant |
| 5165 | REACTOME_ECM_PROTEOGLYCANS                                 | -1.06 | 0.42 | 0 | 0 | 0 | not significant |
| 5166 | GO_CAMP_RESPONSE_ELEMENT_BINDING_PROTEIN_BINDING           | -1.06 | 0.41 | 0 | 0 | 0 | not significant |
| 5167 | GO_CHEMOKINE_C_X_C_MOTIF_LIGAND_2_PRODUCTION               | -1.06 | 0.41 | 0 | 0 | 0 | not significant |
| 5168 | GO_GUANYLATE_KINASE_ACTIVITY                               | -1.06 | 0.41 | 0 | 0 | 0 | not significant |
| 5169 | GO_INTRINSIC_COMPONENT_OF_MITOCHONDRIAL_OUTER_MEMBRANE     | -1.06 | 0.41 | 0 | 0 | 0 | not significant |
| 5170 | GO_NEGATIVE_REGULATION_OF_T_CELL_RECEPTOR_SIGNALING_PATH   | -1.06 | 0.41 | 0 | 0 | 0 | not significant |
| 5171 | GO_REGULATION_OF_NEUTROPHIL_ACTIVATION                     | -1.06 | 0.41 | 0 | 0 | 0 | not significant |
| 5172 | GO_TRANSCRIPTION_DEPENDENT_TETHERING_OF_RNA_POLYMERASE     | -1.06 | 0.41 | 0 | 0 | 0 | not significant |
| 5173 | REACTOME_METABOLISM_OF_FAT_SOLUBLE_VITAMINS                | -1.06 | 0.41 | 0 | 0 | 0 | not significant |
| 5174 | GO_GROWTH_PLATE_CARTILAGE_CHONDROCYTE_DIFFERENTIATION      | -1.06 | 0.40 | 0 | 0 | 0 | not significant |
| 5175 | GO_HINDBRAIN_RADIAL_GLIA_GUIDED_CELL_MIGRATION             | -1.06 | 0.40 | 0 | 0 | 0 | not significant |
| 5176 | GO_MOLYBDOPTERIN_COFACTOR_BIOSYNTHETIC_PROCESS             | -1.06 | 0.40 | 0 | 0 | 0 | not significant |
| 5177 | GO_NUCLEOSIDE_CATABOLIC_PROCESS                            | -1.06 | 0.40 | 0 | 0 | 0 | not significant |
| 5178 | GO_POSITIVE_REGULATION_OF_Helicase_ACTIVITY                | -1.06 | 0.40 | 0 | 0 | 0 | not significant |
| 5179 | GO_POSITIVE_REGULATION_OF_MYELOID_LEUKOCYTE_CYTOKINE_PRO   | -1.06 | 0.40 | 0 | 0 | 0 | not significant |
| 5180 | GO_RNA_TRANSPORT                                           | -1.06 | 0.40 | 0 | 0 | 0 | not significant |
| 5181 | GO_STEROID_ESTERIFICATION                                  | -1.06 | 0.40 | 0 | 0 | 0 | not significant |
| 5182 | HUPER_BREAST_BASAL_VS_LUMINAL_UP                           | -1.06 | 0.40 | 0 | 0 | 0 | not significant |
| 5183 | REACTOME_TRIGLYCERIDE_METABOLISM                           | -1.06 | 0.40 | 0 | 0 | 0 | not significant |
| 5184 | BIOCARTA_LONGEVITY_PATHWAY                                 | -1.06 | 0.39 | 0 | 0 | 0 | not significant |
| 5185 | GO_DOPAMINE_METABOLIC_PROCESS                              | -1.06 | 0.39 | 0 | 0 | 0 | not significant |
| 5186 | GO_LONG_CHAIN_FATTY_ACID_BINDING                           | -1.06 | 0.39 | 0 | 0 | 0 | not significant |
| 5187 | GO_PROTEIN_INSERTION_INTO_ER_MEMBRANE                      | -1.06 | 0.39 | 0 | 0 | 0 | not significant |
| 5188 | GO_TETRAHYDROFOLATE_BIOSYNTHETIC_PROCESS                   | -1.06 | 0.39 | 0 | 0 | 0 | not significant |
| 5189 | GO_POSITIVE_REGULATION_OF_CHEMOKINE_SECRETION              | -1.06 | 0.38 | 0 | 0 | 0 | not significant |
| 5190 | WACKER_HYPOXIA_TARGETS_OF_VHL                              | -1.06 | 0.38 | 0 | 0 | 0 | not significant |
| 5191 | GO_ETHER_METABOLIC_PROCESS                                 | -1.06 | 0.37 | 0 | 0 | 0 | not significant |
| 5192 | GO_Glutamate_CATABOLIC_PROCESS                             | -1.06 | 0.37 | 0 | 0 | 0 | not significant |
| 5193 | GO_CDC42_PROTEIN_SIGNAL_TRANSDUCTION                       | -1.06 | 0.36 | 0 | 0 | 0 | not significant |
| 5194 | REACTOME_PRE_NOTCH_PROCESSING_IN_THE_ENDOPLASMIC_RETICULI  | -1.06 | 0.36 | 0 | 0 | 0 | not significant |
| 5195 | GO_REGULATION_OF_PHOSPHORUS_METABOLIC_PROCESS              | -1.05 | 0.79 | 0 | 0 | 0 | not significant |
| 5196 | GO_NEGATIVE_REGULATION_OF_SIGNALING                        | -1.05 | 0.67 | 0 | 0 | 0 | not significant |
| 5197 | MARTINEZ_TP53_TARGETS_DN                                   | -1.05 | 0.64 | 0 | 0 | 0 | not significant |
| 5198 | NUYTEN_NIPP1_TARGETS_UP                                    | -1.05 | 0.64 | 0 | 0 | 0 | not significant |
| 5199 | MARTINEZ_RB1_TARGETS_DN                                    | -1.05 | 0.56 | 0 | 0 | 0 | not significant |
| 5200 | GO_Peptidase_Activity                                      | -1.05 | 0.55 | 0 | 0 | 0 | not significant |
| 5201 | GO_LAMELLIPODIUM                                           | -1.05 | 0.54 | 0 | 0 | 0 | not significant |
| 5202 | CHR6P21                                                    | -1.05 | 0.53 | 0 | 0 | 0 | not significant |
| 5203 | GO_REGULATION_OF_APOPTOTIC_SIGNALING_PATHWAY               | -1.05 | 0.53 | 0 | 0 | 0 | not significant |
| 5204 | GO_VESICLE_LOCALIZATION                                    | -1.05 | 0.53 | 0 | 0 | 0 | not significant |
| 5205 | KEGG_ENDOCYTOSIS                                           | -1.05 | 0.53 | 0 | 0 | 0 | not significant |
| 5206 | GO_HOMEOSTASIS_OF_NUMBER_OF_CELLS                          | -1.05 | 0.52 | 0 | 0 | 0 | not significant |
| 5207 | GO_REGULATION_OF_WNT_SIGNALING_PATHWAY                     | -1.05 | 0.52 | 0 | 0 | 0 | not significant |
| 5208 | YAGI_AML_WITH_11Q23_REARRANGED                             | -1.05 | 0.52 | 0 | 0 | 0 | not significant |
| 5209 | BILD_HRAS_ONCOGENIC_SIGNATURE                              | -1.05 | 0.50 | 0 | 0 | 0 | not significant |
| 5210 | BROWNE_HCMV_INFECTION_24HR_UP                              | -1.05 | 0.50 | 0 | 0 | 0 | not significant |
| 5211 | THUM_SYSTOLIC_HEART_FAILURE_UP                             | -1.05 | 0.50 | 0 | 0 | 0 | not significant |
| 5212 | GO_AZUROPHIL_Granule                                       | -1.05 | 0.49 | 0 | 0 | 0 | not significant |
| 5213 | KOKKINAKIS_METHIONINE_DEPRIVATION_48HR_UP                  | -1.05 | 0.49 | 0 | 0 | 0 | not significant |
| 5214 | GO_CONDENSED_CHROMOSOME                                    | -1.05 | 0.48 | 0 | 0 | 0 | not significant |
| 5215 | GO_MONOSACCHARIDE_METABOLIC_PROCESS                        | -1.05 | 0.48 | 0 | 0 | 0 | not significant |
| 5216 | GO_NEGATIVE_REGULATION_OF_MAPK_CASCADE                     | -1.05 | 0.48 | 0 | 0 | 0 | not significant |
| 5217 | GO_Type_I_INTERFERON_PRODUCTION                            | -1.05 | 0.48 | 0 | 0 | 0 | not significant |
| 5218 | TONKS_TARGETS_OF_RUNX1_RUNX1T1_FUSION_ERYTHROCYTE_UP       | -1.05 | 0.48 | 0 | 0 | 0 | not significant |
| 5219 | REACTOME_CENTROSOME_MATURATION                             | -1.05 | 0.47 | 0 | 0 | 0 | not significant |
| 5220 | REACTOME_PRC2_METHYLATES_HISTONES_AND_DNA                  | -1.05 | 0.47 | 0 | 0 | 0 | not significant |

|      |                                                                        |       |      |   |   |   |                 |
|------|------------------------------------------------------------------------|-------|------|---|---|---|-----------------|
| 5221 | GAVIN_FOXP3_TARGETS_CLUSTER_P3                                         | -1.05 | 0.46 | 0 | 0 | 0 | not significant |
| 5222 | GO_NEGATIVE_REGULATION_OF_PROTEOLYSIS                                  | -1.05 | 0.46 | 0 | 0 | 0 | not significant |
| 5223 | NABA_ECM_GLYCOPROTEINS                                                 | -1.05 | 0.46 | 0 | 0 | 0 | not significant |
| 5224 | FONTAINE_THYROID_TUMOR_UNCERTAIN_MALIGNANCY_UP                         | -1.05 | 0.45 | 0 | 0 | 0 | not significant |
| 5225 | GERY_CEBP_TARGETS                                                      | -1.05 | 0.45 | 0 | 0 | 0 | not significant |
| 5226 | GO_KINESIN_BINDING                                                     | -1.05 | 0.45 | 0 | 0 | 0 | not significant |
| 5227 | GO_TRANSLATION_REGULATOR_ACTIVITY                                      | -1.05 | 0.45 | 0 | 0 | 0 | not significant |
| 5228 | GRADE_COLON_VS_RECTAL_CANCER_UP                                        | -1.05 | 0.45 | 0 | 0 | 0 | not significant |
| 5229 | BROWNE_HCMV_INFECTION_16HR_DN                                          | -1.05 | 0.44 | 0 | 0 | 0 | not significant |
| 5230 | GO_EAR_DEVELOPMENT                                                     | -1.05 | 0.44 | 0 | 0 | 0 | not significant |
| 5231 | GO_GROWTH_FACTOR_ACTIVITY                                              | -1.05 | 0.44 | 0 | 0 | 0 | not significant |
| 5232 | GO_PURINE_CONTAINING_COMPOUND_CATABOLIC_PROCESS                        | -1.05 | 0.44 | 0 | 0 | 0 | not significant |
| 5233 | KALMA_EZF1_TARGETS                                                     | -1.05 | 0.44 | 0 | 0 | 0 | not significant |
| 5234 | KEGG_ABC_TRANSPORTERS                                                  | -1.05 | 0.44 | 0 | 0 | 0 | not significant |
| 5235 | KEGG_ECM_RECEPTOR_INTERACTION                                          | -1.05 | 0.44 | 0 | 0 | 0 | not significant |
| 5236 | KEGG_PHOSPHATIDYLINOSITOL_SIGNALING_SYSTEM                             | -1.05 | 0.44 | 0 | 0 | 0 | not significant |
| 5237 | LEE_AGING_NEOCORTEX_UP                                                 | -1.05 | 0.44 | 0 | 0 | 0 | not significant |
| 5238 | REACTOME_SIGNALING_BY_EGFR                                             | -1.05 | 0.44 | 0 | 0 | 0 | not significant |
| 5239 | ROSS_AML_WITH_PML_RARA_FUSION                                          | -1.05 | 0.44 | 0 | 0 | 0 | not significant |
| 5240 | GO_CYCLIN_DEPENDENT_PROTEIN_KINASE_HOLOENZYME_COMPLEX                  | -1.05 | 0.43 | 0 | 0 | 0 | not significant |
| 5241 | GO_POSITIVE_REGULATION_OF_DEPHOSPHORYLATION                            | -1.05 | 0.43 | 0 | 0 | 0 | not significant |
| 5242 | MARSON_FOXP3_CORE_DIRECT_TARGETS                                       | -1.05 | 0.43 | 0 | 0 | 0 | not significant |
| 5243 | BIOCARTA_CARDIACEGF_PATHWAY                                            | -1.05 | 0.42 | 0 | 0 | 0 | not significant |
| 5244 | GO_CELLULAR_COMPONENT_DISASSEMBLY_INVOLVED_IN_EXECUTION_I              | -1.05 | 0.42 | 0 | 0 | 0 | not significant |
| 5245 | GO_EMBRYONIC_CAMERA_TYPE_EYE_MORPHOGENESIS                             | -1.05 | 0.42 | 0 | 0 | 0 | not significant |
| 5246 | GO_H4_H2A_HISTONE_ACETYLTRANSFERASE_COMPLEX                            | -1.05 | 0.42 | 0 | 0 | 0 | not significant |
| 5247 | GO_MITOTIC_SPINDLE_POLE                                                | -1.05 | 0.42 | 0 | 0 | 0 | not significant |
| 5248 | GO_PROTEIN_PHOSPHATASE_ACTIVATOR_ACTIVITY                              | -1.05 | 0.42 | 0 | 0 | 0 | not significant |
| 5249 | GO_REGULATION_OF_TYPE_I_INTERFERON_MEDIATED_SIGNALING_PATHWAY          | -1.05 | 0.42 | 0 | 0 | 0 | not significant |
| 5250 | RASHI_RESPONSE_TO_IONIZING_RADIATION_1                                 | -1.05 | 0.42 | 0 | 0 | 0 | not significant |
| 5251 | REACTOME_ACTIVATION_OF_BAD_AND_TRANSLOCATION_TO_MITOCHONDRION          | -1.05 | 0.42 | 0 | 0 | 0 | not significant |
| 5252 | REACTOME_LDL_CLEARANCE                                                 | -1.05 | 0.42 | 0 | 0 | 0 | not significant |
| 5253 | BOYAUIT_LIVER_CANCER_SUBCLASS_G5_DN                                    | -1.05 | 0.41 | 0 | 0 | 0 | not significant |
| 5254 | GO_LOW_DENSITY_LIPOPROTEIN_PARTICLE_BINDING                            | -1.05 | 0.41 | 0 | 0 | 0 | not significant |
| 5255 | GO_NEGATIVE_REGULATION_OF_MUSCLE_HYPERTROPHY                           | -1.05 | 0.41 | 0 | 0 | 0 | not significant |
| 5256 | KUROKAWA_LIVER_CANCER_CHEMOTHERAPY_DN                                  | -1.05 | 0.41 | 0 | 0 | 0 | not significant |
| 5257 | POS_RESPONSE_TO_HISTAMINE_UP                                           | -1.05 | 0.41 | 0 | 0 | 0 | not significant |
| 5258 | RICKMAN_HEAD_AND_NECK_CANCER_C                                         | -1.05 | 0.41 | 0 | 0 | 0 | not significant |
| 5259 | BIOCARTA_VDR_PATHWAY                                                   | -1.05 | 0.40 | 0 | 0 | 0 | not significant |
| 5260 | GO_GLUTATHIONE_METABOLIC_PROCESS                                       | -1.05 | 0.40 | 0 | 0 | 0 | not significant |
| 5261 | GO_NEGATIVE_REGULATION_OF_PROTEIN_MATURATION                           | -1.05 | 0.40 | 0 | 0 | 0 | not significant |
| 5262 | GO_POSITIVE_REGULATION_OF_MRNA_SPLICING_VIA_SPLICEOSOME                | -1.05 | 0.40 | 0 | 0 | 0 | not significant |
| 5263 | GO_RESPONSE_TO_STEROL                                                  | -1.05 | 0.40 | 0 | 0 | 0 | not significant |
| 5264 | GO_UBIQUITIN_CONJUGATING_ENZYME_COMPLEX                                | -1.05 | 0.40 | 0 | 0 | 0 | not significant |
| 5265 | HENDRICKS_SMARCA4_TARGETS_DN                                           | -1.05 | 0.40 | 0 | 0 | 0 | not significant |
| 5266 | KORKOLA_TERATOMA_UP                                                    | -1.05 | 0.40 | 0 | 0 | 0 | not significant |
| 5267 | REACTOME_METABOLISM_OF_NITRIC_OXIDE_ENOS_ACTIVATION_AND_INHIBITION     | -1.05 | 0.40 | 0 | 0 | 0 | not significant |
| 5268 | BIOCARTA_MITOCHONDRIA_PATHWAY                                          | -1.05 | 0.39 | 0 | 0 | 0 | not significant |
| 5269 | CHIANG_LIVER_CANCER_SUBCLASS_POLYSOMY7_DN                              | -1.05 | 0.39 | 0 | 0 | 0 | not significant |
| 5270 | GO_3_5_CYCLIC_GMP_PHOSPHODIESTERASE_ACTIVITY                           | -1.05 | 0.39 | 0 | 0 | 0 | not significant |
| 5271 | GO_CCR_CHEMOKINE_RECEPTOR_BINDING                                      | -1.05 | 0.39 | 0 | 0 | 0 | not significant |
| 5272 | GO_LIPID_DROPLET_ORGANIZATION                                          | -1.05 | 0.39 | 0 | 0 | 0 | not significant |
| 5273 | GO_MEGAKARYOCYTE_DEVELOPMENT                                           | -1.05 | 0.39 | 0 | 0 | 0 | not significant |
| 5274 | GO_MITOCHONDRIAL_GENOME_MAINTENANCE                                    | -1.05 | 0.39 | 0 | 0 | 0 | not significant |
| 5275 | GO_NEGATIVE_REGULATION_OF_HEMATOPOIETIC_PROGENITOR_CELL                | -1.05 | 0.39 | 0 | 0 | 0 | not significant |
| 5276 | GO_PHOSPHORYLATION_OF_RNA_POLYMERASE_II_C_TERMINAL_DOMAIN              | -1.05 | 0.39 | 0 | 0 | 0 | not significant |
| 5277 | GO_POSITIVE_REGULATION_OF_IRE1_MEDIATED_UNFOLDED_PROTEIN_RESPONSE      | -1.05 | 0.39 | 0 | 0 | 0 | not significant |
| 5278 | GO_POSITIVE_REGULATION_OF_PHOSPHOLIPID_TRANSPORT                       | -1.05 | 0.39 | 0 | 0 | 0 | not significant |
| 5279 | GO_RESPONSE_TO_ETHER                                                   | -1.05 | 0.39 | 0 | 0 | 0 | not significant |
| 5280 | HOEGERKORP_CD44_TARGETS_TEMPORAL_DN                                    | -1.05 | 0.39 | 0 | 0 | 0 | not significant |
| 5281 | MYLLYKANGAS_AMPLIFICATION_HOT_SPOT_24                                  | -1.05 | 0.39 | 0 | 0 | 0 | not significant |
| 5282 | GO_ALANINE_TRANSPORT                                                   | -1.05 | 0.38 | 0 | 0 | 0 | not significant |
| 5283 | GO_CALCIIUM_TRANSPORTING_ATPASE_ACTIVITY                               | -1.05 | 0.38 | 0 | 0 | 0 | not significant |
| 5284 | GO_CLATHRIN_COMPLEX                                                    | -1.05 | 0.38 | 0 | 0 | 0 | not significant |
| 5285 | GO_PHOSPHOSERINE_RESIDUE_BINDING                                       | -1.05 | 0.38 | 0 | 0 | 0 | not significant |
| 5286 | GO_REGULATION_OF_LAMELLIPODIUM_MORPHOGENESIS                           | -1.05 | 0.38 | 0 | 0 | 0 | not significant |
| 5287 | GO_POLYNUCLEOTIDE_ADENYLYLTRANSFERASE_ACTIVITY                         | -1.05 | 0.37 | 0 | 0 | 0 | not significant |
| 5288 | REACTOME_RECYCLING_OF_BILE_ACIDS_AND_SALTS                             | -1.05 | 0.36 | 0 | 0 | 0 | not significant |
| 5289 | ZELLSTRA_CD44_TARGETS_DN                                               | -1.05 | 0.36 | 0 | 0 | 0 | not significant |
| 5290 | GO_REGULATION_OF_GLOMERULUS_DEVELOPMENT                                | -1.05 | 0.34 | 0 | 0 | 0 | not significant |
| 5291 | GO_POSITIVE_REGULATION_OF_GENE_EXPRESSION                              | -1.04 | 0.86 | 0 | 0 | 0 | not significant |
| 5292 | GO_REGULATION_OF_PROTEIN_MODIFICATION_PROCESS                          | -1.04 | 0.68 | 0 | 0 | 0 | not significant |
| 5293 | GO_HEAD_DEVELOPMENT                                                    | -1.04 | 0.51 | 0 | 0 | 0 | not significant |
| 5294 | GO_LIPID_CATABOLIC_PROCESS                                             | -1.04 | 0.51 | 0 | 0 | 0 | not significant |
| 5295 | GO_CARTILAGE_DEVELOPMENT                                               | -1.04 | 0.48 | 0 | 0 | 0 | not significant |
| 5296 | GO_POSITIVE_REGULATION_OF_PROTEIN_CATABOLIC_PROCESS                    | -1.04 | 0.48 | 0 | 0 | 0 | not significant |
| 5297 | BONOME_OVARIAN_CANCER_SURVIVAL_OPTIMAL_DEBULKING                       | -1.04 | 0.47 | 0 | 0 | 0 | not significant |
| 5298 | HOLLMANN_APOPTOSIS_VIA_CD40_DN                                         | -1.04 | 0.47 | 0 | 0 | 0 | not significant |
| 5299 | ZHOU_INFLAMMATORY_RESPONSE_FIMA_UP                                     | -1.04 | 0.47 | 0 | 0 | 0 | not significant |
| 5300 | GO_DNA_REPLICATION_INDEPENDENT_NUCLEOSOME_ORGANIZATION                 | -1.04 | 0.46 | 0 | 0 | 0 | not significant |
| 5301 | GO_LAMELLIPODIUM_ORGANIZATION                                          | -1.04 | 0.46 | 0 | 0 | 0 | not significant |
| 5302 | GO_ORGANOPHOSPHATE_CATABOLIC_PROCESS                                   | -1.04 | 0.46 | 0 | 0 | 0 | not significant |
| 5303 | KEGG_VIRAL_MYOCARDITIS                                                 | -1.04 | 0.46 | 0 | 0 | 0 | not significant |
| 5304 | GO_CLATHRIN_COATED_PIT                                                 | -1.04 | 0.45 | 0 | 0 | 0 | not significant |
| 5305 | GO_COPIII_COATED_ER_TO_GOLGI_TRANSPORT_VESICLE                         | -1.04 | 0.45 | 0 | 0 | 0 | not significant |
| 5306 | PURBEY_TARGETS_OF_CTBP1_AND_SATB1_DN                                   | -1.04 | 0.45 | 0 | 0 | 0 | not significant |
| 5307 | CHIANG_LIVER_CANCER_SUBCLASS_CTNNB1_DN                                 | -1.04 | 0.44 | 0 | 0 | 0 | not significant |
| 5308 | DANG_REGULATED_BY_MYC_DN                                               | -1.04 | 0.44 | 0 | 0 | 0 | not significant |
| 5309 | GO_CELLULAR_RESPONSE_TO_IONIZING_RADIATION                             | -1.04 | 0.44 | 0 | 0 | 0 | not significant |
| 5310 | GO_POSITIVE_REGULATION_OF_CELL_DIVISION                                | -1.04 | 0.44 | 0 | 0 | 0 | not significant |
| 5311 | GO_PROTEIN_LOCALIZATION_TO_PLASMA_MEMBRANE                             | -1.04 | 0.44 | 0 | 0 | 0 | not significant |
| 5312 | GO_REGULATION_OF_NOTCH_SIGNALING_PATHWAY                               | -1.04 | 0.44 | 0 | 0 | 0 | not significant |
| 5313 | REACTOME_TRIF_TICAM1_MEDIATED_TLR4_SIGNALING                           | -1.04 | 0.44 | 0 | 0 | 0 | not significant |
| 5314 | REACTOME_UNFOLDED_PROTEIN_RESPONSE_UPR                                 | -1.04 | 0.44 | 0 | 0 | 0 | not significant |
| 5315 | CREIGHTON_AKT1_SIGNALING_VIA_MTOR_UP                                   | -1.04 | 0.43 | 0 | 0 | 0 | not significant |
| 5316 | GO_DETECTION_OF_LIGHT_STIMULUS                                         | -1.04 | 0.43 | 0 | 0 | 0 | not significant |
| 5317 | GO_PROTEIN_TYROSINE_KINASE_BINDING                                     | -1.04 | 0.43 | 0 | 0 | 0 | not significant |
| 5318 | KEGG_VASOPRESSIN_REGULATED_WATER_REABSORPTION                          | -1.04 | 0.43 | 0 | 0 | 0 | not significant |
| 5319 | LANG_MYB_FAMILY_TARGETS                                                | -1.04 | 0.43 | 0 | 0 | 0 | not significant |
| 5320 | LEE_CALORIE_RESTRICTION_MUSCLE_DN                                      | -1.04 | 0.43 | 0 | 0 | 0 | not significant |
| 5321 | REACTOME_ANCHORING_OF_THE_BASAL_BODY_TO_THE_PLASMA_MEMBRANE            | -1.04 | 0.43 | 0 | 0 | 0 | not significant |
| 5322 | GO_INTERFERON_BETA_PRODUCTION                                          | -1.04 | 0.42 | 0 | 0 | 0 | not significant |
| 5323 | GO_REGULATION_OF_CALCINEURIN_MEDIATED_SIGNALING                        | -1.04 | 0.42 | 0 | 0 | 0 | not significant |
| 5324 | GO_REGULATION_OF_COFACTOR_METABOLIC_PROCESS                            | -1.04 | 0.42 | 0 | 0 | 0 | not significant |
| 5325 | CAHOY_OLIGODENDROCYTIC                                                 | -1.04 | 0.41 | 0 | 0 | 0 | not significant |
| 5326 | GENTILE_UV_RESPONSE_CLUSTER_D1                                         | -1.04 | 0.41 | 0 | 0 | 0 | not significant |
| 5327 | GO_HSP90_PROTEIN_BINDING                                               | -1.04 | 0.41 | 0 | 0 | 0 | not significant |
| 5328 | GO_MYOSIN_BINDING                                                      | -1.04 | 0.41 | 0 | 0 | 0 | not significant |
| 5329 | GO_NUCLEAR_TRANSCRIBED_MRNA_CATABOLIC_PROCESS_EXONUCLEOLAR_DEGRADATION | -1.04 | 0.41 | 0 | 0 | 0 | not significant |

|      |                                                           |       |      |   |   |   |                 |
|------|-----------------------------------------------------------|-------|------|---|---|---|-----------------|
| 5330 | GO POSITIVE REGULATION OF SKELETAL MUSCLE TISSUE DEVELOPI | -1.04 | 0.41 | 0 | 0 | 0 | not significant |
| 5331 | GO_POSITIVE_REGULATION_OF_TUMOR_NECROSIS_FACTOR_SUPERFA   | -1.04 | 0.41 | 0 | 0 | 0 | not significant |
| 5332 | GO_REGULATION_OF_RUFFLE_ASSEMBLY                          | -1.04 | 0.41 | 0 | 0 | 0 | not significant |
| 5333 | GO_SKELETAL_MUSCLE_CONTRACTION                            | -1.04 | 0.41 | 0 | 0 | 0 | not significant |
| 5334 | HAN_JNK_SIGNALING_DN                                      | -1.04 | 0.41 | 0 | 0 | 0 | not significant |
| 5335 | KYNG_RESPONSE_TO_H2O2_VIA_ERCC6_UP                        | -1.04 | 0.41 | 0 | 0 | 0 | not significant |
| 5336 | SANA_TNF_SIGNALING_UP                                     | -1.04 | 0.41 | 0 | 0 | 0 | not significant |
| 5337 | GO_AXIS_ELONGATION                                        | -1.04 | 0.40 | 0 | 0 | 0 | not significant |
| 5338 | GO_NEGATIVE_REGULATION_OF_MUSCLE_CELL_APOPTOTIC_PROCESS   | -1.04 | 0.40 | 0 | 0 | 0 | not significant |
| 5339 | GO_OUTFLOW_TRACT_MORPHOGENESIS                            | -1.04 | 0.40 | 0 | 0 | 0 | not significant |
| 5340 | GO_POSITIVE_REGULATION_OF_ALPHA_BETA_T_CELL_ACTIVATION    | -1.04 | 0.40 | 0 | 0 | 0 | not significant |
| 5341 | GO_PROTEIN_K63_LINKED_UBIQUITINATION                      | -1.04 | 0.40 | 0 | 0 | 0 | not significant |
| 5342 | GO_REGULATION_OF_SYNAPTIC_VESICLE_TRANSPORT               | -1.04 | 0.40 | 0 | 0 | 0 | not significant |
| 5343 | RASHI_RESPONSE_TO_IONIZING_RADIATION_3                    | -1.04 | 0.40 | 0 | 0 | 0 | not significant |
| 5344 | VALK_AML_WITH_CEBPA                                       | -1.04 | 0.40 | 0 | 0 | 0 | not significant |
| 5345 | ABE_VEGFA_TARGETS_2HR                                     | -1.04 | 0.39 | 0 | 0 | 0 | not significant |
| 5346 | BIOCARTA_IGF1_PATHWAY                                     | -1.04 | 0.39 | 0 | 0 | 0 | not significant |
| 5347 | GO_NEGATIVE_REGULATION_OF_LIPID_STORAGE                   | -1.04 | 0.39 | 0 | 0 | 0 | not significant |
| 5348 | GO_NUCLEOSIDE_DIPHOSPHATE_BIOSYNTHETIC_PROCESS            | -1.04 | 0.39 | 0 | 0 | 0 | not significant |
| 5349 | GO_PENTOSE_PHOSPHATE_SHUNT                                | -1.04 | 0.39 | 0 | 0 | 0 | not significant |
| 5350 | GO_REGULATION_OF_ALKALINE_PHOSPHATASE_ACTIVITY            | -1.04 | 0.39 | 0 | 0 | 0 | not significant |
| 5351 | GO_RESPONSE_TO_ACIDIC_PH                                  | -1.04 | 0.39 | 0 | 0 | 0 | not significant |
| 5352 | GO_RESPONSE_TO_EPINEPHRINE                                | -1.04 | 0.39 | 0 | 0 | 0 | not significant |
| 5353 | GO_TRANSFERRIN_RECEPTOR_BINDING                           | -1.04 | 0.39 | 0 | 0 | 0 | not significant |
| 5354 | MCBRYAN_PUBERTAL_BREAST_3_4WK_DN                          | -1.04 | 0.39 | 0 | 0 | 0 | not significant |
| 5355 | REACTOME_DEFECTIVE_EXT2_CAUSES_EXOSTOSES_2                | -1.04 | 0.39 | 0 | 0 | 0 | not significant |
| 5356 | BIOCARTA_RNA_PATHWAY                                      | -1.04 | 0.38 | 0 | 0 | 0 | not significant |
| 5357 | GO_PHOSPHATIDYLINOSITOL_PHOSPHATE_4_PHOSPHATASE_ACTIVITY  | -1.04 | 0.38 | 0 | 0 | 0 | not significant |
| 5358 | GO_POSITIVE_REGULATION_OF_HISTONE_DEACETYLATION           | -1.04 | 0.38 | 0 | 0 | 0 | not significant |
| 5359 | GO_REGULATION_OF_RESPONSE_TO_EXTRACELLULAR_STIMULUS       | -1.04 | 0.38 | 0 | 0 | 0 | not significant |
| 5360 | REACTOME_SIGNALING_BY_NTRK3_TRKC                          | -1.04 | 0.38 | 0 | 0 | 0 | not significant |
| 5361 | RUAN_RESPONSE_TO_TNF_TROGLITAZONE_UP                      | -1.04 | 0.38 | 0 | 0 | 0 | not significant |
| 5362 | GO_ANTEROGRADE_AXONAL_PROTEIN_TRANSPORT                   | -1.04 | 0.37 | 0 | 0 | 0 | not significant |
| 5363 | GO_CELL_MIGRATION_IN_HINDBRAIN                            | -1.04 | 0.37 | 0 | 0 | 0 | not significant |
| 5364 | GO_CELLULAR_RESPONSE_TO_BRAIN_DERIVED_NEUROTROPHIC_FACT   | -1.04 | 0.37 | 0 | 0 | 0 | not significant |
| 5365 | GO_CHEMOKINE_C_C_MOTIF_LIGAND_5_PRODUCTION                | -1.04 | 0.37 | 0 | 0 | 0 | not significant |
| 5366 | GO_DOUBLE_STRAND_BREAK_REPAIR_VIA_SYNTHESIS_DEPENDENT_ST  | -1.04 | 0.37 | 0 | 0 | 0 | not significant |
| 5367 | GO_PHOSPHATIDYLINOSITOL_3_5_BISPHOSPHATE_PHOSPHATASE_ACTI | -1.04 | 0.37 | 0 | 0 | 0 | not significant |
| 5368 | GO_POSITIVE_REGULATION_BY_HOST_OF_VIRAL_GENOME_REPLICATIO | -1.04 | 0.37 | 0 | 0 | 0 | not significant |
| 5369 | GO_SCARNA_LOCALIZATION_TO_CAJAL_BODY                      | -1.04 | 0.37 | 0 | 0 | 0 | not significant |
| 5370 | BIOCARTA_AGPCR_PATHWAY                                    | -1.04 | 0.36 | 0 | 0 | 0 | not significant |
| 5371 | GO_5_3_EXODEOXYRIBONUCLEASE_ACTIVITY                      | -1.04 | 0.36 | 0 | 0 | 0 | not significant |
| 5372 | GO_NEGATIVE_REGULATION_OF_PROTEIN_FOLDING                 | -1.04 | 0.36 | 0 | 0 | 0 | not significant |
| 5373 | GO_PROSTAGLANDIN_TRANSPORT                                | -1.04 | 0.36 | 0 | 0 | 0 | not significant |
| 5374 | HERNANDEZ_MITOTIC_ARREST_BY_DOCETAXEL_2_DN                | -1.04 | 0.36 | 0 | 0 | 0 | not significant |
| 5375 | MIKHAYLOVA_OXIDATIVE_STRESS_RESPONSE_VIA_VHL_DN           | -1.04 | 0.36 | 0 | 0 | 0 | not significant |
| 5376 | REACTOME_PLASMA_LIPOPROTEIN_ASSEMBLY                      | -1.04 | 0.36 | 0 | 0 | 0 | not significant |
| 5377 | CHEOK_RESPONSE_TO_MERCAPTOPYRINE_AND_HD_MTX_UP            | -1.04 | 0.35 | 0 | 0 | 0 | not significant |
| 5378 | GO_AMYLOID_BETA_CLEARANCE_BY_CELLULAR_CATABOLIC_PROCESS   | -1.04 | 0.35 | 0 | 0 | 0 | not significant |
| 5379 | GO_RS_DOMAIN_BINDING                                      | -1.04 | 0.35 | 0 | 0 | 0 | not significant |
| 5380 | NAKAMURA_CANCER_MICROENVIRONMENT_UP                       | -1.04 | 0.35 | 0 | 0 | 0 | not significant |
| 5381 | REACTOME_PD_1_SIGNALING                                   | -1.04 | 0.35 | 0 | 0 | 0 | not significant |
| 5382 | GO_REGULATION_OF_PROTEIN_LOCALIZATION                     | -1.03 | 0.60 | 0 | 0 | 0 | not significant |
| 5383 | GO_POSITIVE_REGULATION_OF_PROTEIN_MODIFICATION_PROCESS    | -1.03 | 0.53 | 0 | 0 | 0 | not significant |
| 5384 | GO_GOLGI_VESICLE_TRANSPORT                                | -1.03 | 0.49 | 0 | 0 | 0 | not significant |
| 5385 | GO_ANION_TRANSPORT                                        | -1.03 | 0.48 | 0 | 0 | 0 | not significant |
| 5386 | KOYAMA_SEMA3B_TARGETS_DN                                  | -1.03 | 0.47 | 0 | 0 | 0 | not significant |
| 5387 | GO_RNA_PHOSPHODIESTER_BOND_HYDROLYSIS_ENDONUCLEOLYTIC     | -1.03 | 0.45 | 0 | 0 | 0 | not significant |
| 5388 | LU_AGING_BRAIN_UP                                         | -1.03 | 0.45 | 0 | 0 | 0 | not significant |
| 5389 | ACEVEDO_LIVER_CANCER_DN                                   | -1.03 | 0.44 | 0 | 0 | 0 | not significant |
| 5390 | PKCA_DN_V1_DN                                             | -1.03 | 0.44 | 0 | 0 | 0 | not significant |
| 5391 | GO_APICAL_PART_OF_CELL                                    | -1.03 | 0.43 | 0 | 0 | 0 | not significant |
| 5392 | GO_INTERLEUKIN_1_BETA_PRODUCTION                          | -1.03 | 0.43 | 0 | 0 | 0 | not significant |
| 5393 | GO_NEGATIVE_REGULATION_OF_TRANSPORTER_ACTIVITY            | -1.03 | 0.43 | 0 | 0 | 0 | not significant |
| 5394 | GO_RESPONSE_TO_METAL_ION                                  | -1.03 | 0.43 | 0 | 0 | 0 | not significant |
| 5395 | GO_SIGNAL_TRANSDUCTION_IN_RESPONSE_TO_DNA_DAMAGE          | -1.03 | 0.43 | 0 | 0 | 0 | not significant |
| 5396 | PID_AR_TF_PATHWAY                                         | -1.03 | 0.43 | 0 | 0 | 0 | not significant |
| 5397 | GO_ANTIGEN_PROCESSING_AND_PRESENTATION_VIA_MHC_CLASS_IB   | -1.03 | 0.42 | 0 | 0 | 0 | not significant |
| 5398 | GO_CALCIIUM_DEPENDENT_PROTEIN_KINASE_ACTIVITY             | -1.03 | 0.42 | 0 | 0 | 0 | not significant |
| 5399 | GO_CELL_MIGRATION_INVOLVED_IN_SPROUTING_ANGIOGENESIS      | -1.03 | 0.42 | 0 | 0 | 0 | not significant |
| 5400 | GO_EMBRYONIC_ORGAN_MORPHOGENESIS                          | -1.03 | 0.42 | 0 | 0 | 0 | not significant |
| 5401 | GO_G_PROTEIN_COUPLED_RECEPTOR_SIGNALING_PATHWAY_COUPLEI   | -1.03 | 0.42 | 0 | 0 | 0 | not significant |
| 5402 | GO_NEPHRON_MORPHOGENESIS                                  | -1.03 | 0.42 | 0 | 0 | 0 | not significant |
| 5403 | GO_NEURON_APOPTOTIC_PROCESS                               | -1.03 | 0.42 | 0 | 0 | 0 | not significant |
| 5404 | GO_NUCLEAR_TRANSCRIPTION_FACTOR_COMPLEX                   | -1.03 | 0.42 | 0 | 0 | 0 | not significant |
| 5405 | REACTOME_PLATELET_HOMEOSTASIS                             | -1.03 | 0.42 | 0 | 0 | 0 | not significant |
| 5406 | GO_PEPTIDYL_THREONINE_MODIFICATION                        | -1.03 | 0.41 | 0 | 0 | 0 | not significant |
| 5407 | GO_PYRIMIDINE_CONTAINING_COMPOUND_CATABOLIC_PROCESS       | -1.03 | 0.41 | 0 | 0 | 0 | not significant |
| 5408 | GO_REGULATION_OF_ERBB_SIGNALING_PATHWAY                   | -1.03 | 0.41 | 0 | 0 | 0 | not significant |
| 5409 | GO_REGULATION_OF_HORMONE_SECRETION                        | -1.03 | 0.41 | 0 | 0 | 0 | not significant |
| 5410 | LABBE_WNT3A_TARGETS_DN                                    | -1.03 | 0.41 | 0 | 0 | 0 | not significant |
| 5411 | LEE_AGING_CEREBELLUM_UP                                   | -1.03 | 0.41 | 0 | 0 | 0 | not significant |
| 5412 | REACTOME_SULFUR_AMINO_ACID_METABOLISM                     | -1.03 | 0.41 | 0 | 0 | 0 | not significant |
| 5413 | TAVAZOLE_METASTASIS                                       | -1.03 | 0.41 | 0 | 0 | 0 | not significant |
| 5414 | BAE_BRCA1_TARGETS_UP                                      | -1.03 | 0.40 | 0 | 0 | 0 | not significant |
| 5415 | GO_CENTRAL_NERVOUS_SYSTEM_PROJECTION_NEURON_AXONOGENE     | -1.03 | 0.40 | 0 | 0 | 0 | not significant |
| 5416 | GO_MITOTIC_CYTOKINETIC_PROCESS                            | -1.03 | 0.40 | 0 | 0 | 0 | not significant |
| 5417 | GO_PHOTOTRANSDUCTION                                      | -1.03 | 0.40 | 0 | 0 | 0 | not significant |
| 5418 | GO_RNA_SURVEILLANCE                                       | -1.03 | 0.40 | 0 | 0 | 0 | not significant |
| 5419 | HOSHIDA_LIVER_CANCER_SURVIVAL_UP                          | -1.03 | 0.40 | 0 | 0 | 0 | not significant |
| 5420 | KEGG_FOCAL_ADHESION                                       | -1.03 | 0.40 | 0 | 0 | 0 | not significant |
| 5421 | MORI_MATURE_B_LYMPHOCYTE_UP                               | -1.03 | 0.40 | 0 | 0 | 0 | not significant |
| 5422 | REACTOME_GAP_JUNCTION_DEGRADATION                         | -1.03 | 0.40 | 0 | 0 | 0 | not significant |
| 5423 | REACTOME_INTERLEUKIN_4_AND_INTERLEUKIN_13_SIGNALING       | -1.03 | 0.40 | 0 | 0 | 0 | not significant |
| 5424 | REACTOME_VITAMIN_B5_PANTOTHENATE_METABOLISM               | -1.03 | 0.40 | 0 | 0 | 0 | not significant |
| 5425 | REN_ALVEOLAR_RHABDOMYOSARCOMA_UP                          | -1.03 | 0.40 | 0 | 0 | 0 | not significant |
| 5426 | SATO_SILENCED_EPIGENETICALLY_IN_PANCREATIC_CANCER         | -1.03 | 0.40 | 0 | 0 | 0 | not significant |
| 5427 | ZWANG_EGF_INTERVAL_UP                                     | -1.03 | 0.40 | 0 | 0 | 0 | not significant |
| 5428 | GO_HISTONE_METHYLTRANSFERASE_ACTIVITY                     | -1.03 | 0.39 | 0 | 0 | 0 | not significant |
| 5429 | GO_MOTOR_ACTIVITY                                         | -1.03 | 0.39 | 0 | 0 | 0 | not significant |
| 5430 | GO_NEGATIVE_REGULATION_OF_PHOSPHATIDYLINOSITOL_3_KINASE_S | -1.03 | 0.39 | 0 | 0 | 0 | not significant |
| 5431 | GO_NEGATIVE_REGULATION_OF_TRANSCRIPTION_FROM_RNA_POLYME   | -1.03 | 0.39 | 0 | 0 | 0 | not significant |
| 5432 | GO_PHOSPHATIDYLINOSITOL_PHOSPHATE_PHOSPHATASE_ACTIVITY    | -1.03 | 0.39 | 0 | 0 | 0 | not significant |
| 5433 | GO_REGULATION_OF_MITOTIC_CENTROSOME_SEPARATION            | -1.03 | 0.39 | 0 | 0 | 0 | not significant |
| 5434 | GO_RUFFLE_MEMBRANE                                        | -1.03 | 0.39 | 0 | 0 | 0 | not significant |
| 5435 | HONRADO_BREAST_CANCER_BRCA1_VS_BRCA2                      | -1.03 | 0.39 | 0 | 0 | 0 | not significant |
| 5436 | MCCLUNG_COCAIN_REWARD_4WK                                 | -1.03 | 0.39 | 0 | 0 | 0 | not significant |
| 5437 | OHGUCHI_LIVER_HNF4A_TARGETS_UP                            | -1.03 | 0.39 | 0 | 0 | 0 | not significant |
| 5438 | REACTOME_TRANS_GOLGI_NETWORK_VESICLE_BUDDING              | -1.03 | 0.39 | 0 | 0 | 0 | not significant |

|      |                                                             |       |      |   |   |   |                 |
|------|-------------------------------------------------------------|-------|------|---|---|---|-----------------|
| 5439 | FINETTI_BREAST_CANCER_KINOME_GREEN                          | -1.03 | 0.38 | 0 | 0 | 0 | not significant |
| 5440 | GO_CELL_COMMUNICATION_INVOLVED_IN_CARDIAC_CONDUCTION        | -1.03 | 0.38 | 0 | 0 | 0 | not significant |
| 5441 | GO_CHEMICAL_HOMEOSTASIS_WITHIN_A_TISSUE                     | -1.03 | 0.38 | 0 | 0 | 0 | not significant |
| 5442 | GO_NEGATIVE_REGULATION_OF_MUSCLE_CONTRACTION                | -1.03 | 0.38 | 0 | 0 | 0 | not significant |
| 5443 | GO_PLASMA_MEMBRANE_TO_ENDOSOME_TRANSPORT                    | -1.03 | 0.38 | 0 | 0 | 0 | not significant |
| 5444 | GO_POSITIVE_REGULATION_OF_CALCIIUM_IION_TRANSPORT_INTO_CYTC | -1.03 | 0.38 | 0 | 0 | 0 | not significant |
| 5445 | GO_POSITIVE_REGULATION_OF_NIK_NF_KAPPAB_SIGNALING           | -1.03 | 0.38 | 0 | 0 | 0 | not significant |
| 5446 | GO_REGULATION_OF_TRANSCRIPTION_ELONGATION_FROM_RNA_POLY     | -1.03 | 0.38 | 0 | 0 | 0 | not significant |
| 5447 | GO_RESPONSE_TO_GAMMA_RADIATION                              | -1.03 | 0.38 | 0 | 0 | 0 | not significant |
| 5448 | MOOYTHA_FFA_OXYDATION                                       | -1.03 | 0.38 | 0 | 0 | 0 | not significant |
| 5449 | REACTOME_FCERI_MEDIATED_MAPK_ACTIVATION                     | -1.03 | 0.38 | 0 | 0 | 0 | not significant |
| 5450 | XU_HGF_TARGETS_REPRESSED_BY_AKT1_UP                         | -1.03 | 0.38 | 0 | 0 | 0 | not significant |
| 5451 | GO_INOSITOL_PHOSPHATE_PHOSPHATASE_ACTIVITY                  | -1.03 | 0.37 | 0 | 0 | 0 | not significant |
| 5452 | GO_INWARD_RECTIFIER_POTASSIUM_CHANNEL_ACTIVITY              | -1.03 | 0.37 | 0 | 0 | 0 | not significant |
| 5453 | GO_REGULATION_OF_RNA_BINDING                                | -1.03 | 0.37 | 0 | 0 | 0 | not significant |
| 5454 | GO_REGULATION_OF_SYNAPTIC_TRANSMISSION_DOPAMINERGIC         | -1.03 | 0.37 | 0 | 0 | 0 | not significant |
| 5455 | GO_REGULATION_OF_URINE_VOLUME                               | -1.03 | 0.37 | 0 | 0 | 0 | not significant |
| 5456 | GO_RIBOSOMAL_LARGE_SUBUNIT_ASSEMBLY                         | -1.03 | 0.37 | 0 | 0 | 0 | not significant |
| 5457 | LEIN_PONS_MARKERS                                           | -1.03 | 0.37 | 0 | 0 | 0 | not significant |
| 5458 | WORSCHCHECH_TUMOR_EVASION_AND_TOLEROGENICITY_DN             | -1.03 | 0.37 | 0 | 0 | 0 | not significant |
| 5459 | GO_INTRINSIC_COMPONENT_OF_EXTERNAL_SIDE_OF_PLASMA_MEMBR     | -1.03 | 0.36 | 0 | 0 | 0 | not significant |
| 5460 | GO_LAYER_FORMATION_IN_CEREBRAL_CORTEX                       | -1.03 | 0.36 | 0 | 0 | 0 | not significant |
| 5461 | GO_REPLICATION_FORK_PROTECTION_COMPLEX                      | -1.03 | 0.36 | 0 | 0 | 0 | not significant |
| 5462 | GO_SERTOLI_CELL_DIFFERENTIATION                             | -1.03 | 0.36 | 0 | 0 | 0 | not significant |
| 5463 | REACTOME_MITOCHONDRIAL_IRON_SULFUR_CLUSTER_BIOGENESIS       | -1.03 | 0.36 | 0 | 0 | 0 | not significant |
| 5464 | BIOCARTA_HES_PATHWAY                                        | -1.03 | 0.35 | 0 | 0 | 0 | not significant |
| 5465 | CORRADETTI_MTOR_PATHWAY_REGULATORS_DN                       | -1.03 | 0.35 | 0 | 0 | 0 | not significant |
| 5466 | GENTLES_LEUKEMIC_STEM_CELL_DN                               | -1.03 | 0.35 | 0 | 0 | 0 | not significant |
| 5467 | GO_CORTICAL_ENDOPLASMIC_RETICULUM                           | -1.03 | 0.35 | 0 | 0 | 0 | not significant |
| 5468 | REACTOME_ARMS_MEDIATED_ACTIVATION                           | -1.03 | 0.35 | 0 | 0 | 0 | not significant |
| 5469 | GO_NUCLEAR_STRESS_GRANULE                                   | -1.03 | 0.34 | 0 | 0 | 0 | not significant |
| 5470 | GO_TRNA_PSEUDOURIDINE_SYNTHESIS                             | -1.03 | 0.34 | 0 | 0 | 0 | not significant |
| 5471 | PID_P38_MK2_PATHWAY                                         | -1.03 | 0.34 | 0 | 0 | 0 | not significant |
| 5472 | GO_NEGATIVE_REGULATION_OF_PROTEIN_METABOLIC_PROCESS         | -1.02 | 0.52 | 0 | 0 | 0 | not significant |
| 5473 | GO_EMBRYONIC_ORGAN_DEVELOPMENT                              | -1.02 | 0.45 | 0 | 0 | 0 | not significant |
| 5474 | GO_REGULATION_OF_CELLULAR_PROTEIN_LOCALIZATION              | -1.02 | 0.45 | 0 | 0 | 0 | not significant |
| 5475 | GO_CELLULAR_MACROMOLECULE_LOCALIZATION                      | -1.02 | 0.42 | 0 | 0 | 0 | not significant |
| 5476 | GO_PEPTIDE_METABOLIC_PROCESS                                | -1.02 | 0.42 | 0 | 0 | 0 | not significant |
| 5477 | GO_POSITIVE_REGULATION_OF_CELL_CYCLE_ARREST                 | -1.02 | 0.42 | 0 | 0 | 0 | not significant |
| 5478 | GO_POSITIVE_REGULATION_OF_CELL_DEVELOPMENT                  | -1.02 | 0.42 | 0 | 0 | 0 | not significant |
| 5479 | GO_HEART_GROWTH                                             | -1.02 | 0.41 | 0 | 0 | 0 | not significant |
| 5480 | GO_NEGATIVE_REGULATION_OF_NEURON_PROJECTION_DEVELOPMENT     | -1.02 | 0.41 | 0 | 0 | 0 | not significant |
| 5481 | GO_REGULATION_OF_CELLULAR_LOCALIZATION                      | -1.02 | 0.41 | 0 | 0 | 0 | not significant |
| 5482 | MULLIGHAN_NPM1_MUTATED_SIGNATURE_2_UP                       | -1.02 | 0.41 | 0 | 0 | 0 | not significant |
| 5483 | PID_IL8_CXCR2_PATHWAY                                       | -1.02 | 0.41 | 0 | 0 | 0 | not significant |
| 5484 | CHR4Q32                                                     | -1.02 | 0.40 | 0 | 0 | 0 | not significant |
| 5485 | DING_LUNG_CANCER_EXPRESSION_BY_COPY_NUMBER                  | -1.02 | 0.40 | 0 | 0 | 0 | not significant |
| 5486 | JAK2_DN.V1_UP                                               | -1.02 | 0.40 | 0 | 0 | 0 | not significant |
| 5487 | REACTOME_DNA_DAMAGE_TELOMERE_STRESS_INDUCED_SENESCENC       | -1.02 | 0.40 | 0 | 0 | 0 | not significant |
| 5488 | REACTOME_SIGNALING_BY_BRAF_AND_RAF_FUSIONS                  | -1.02 | 0.40 | 0 | 0 | 0 | not significant |
| 5489 | ATF2_UP.V1_DN                                               | -1.02 | 0.39 | 0 | 0 | 0 | not significant |
| 5490 | CHIANG_LIVER_CANCER_SUBCLASS_INTERFERON_UP                  | -1.02 | 0.39 | 0 | 0 | 0 | not significant |
| 5491 | GO_CEREBRAL_CORTEX_RADIIALLY_ORIENTED_CELL_MIGRATION        | -1.02 | 0.39 | 0 | 0 | 0 | not significant |
| 5492 | GO_DENDRITIC_CELL_DIFFERENTIATION                           | -1.02 | 0.39 | 0 | 0 | 0 | not significant |
| 5493 | GO_DNA_METHYLATION_OR_DEMETHYLATION                         | -1.02 | 0.39 | 0 | 0 | 0 | not significant |
| 5494 | GO_POSITIVE_REGULATION_OF_CHROMOSOME_SEGREGATION            | -1.02 | 0.39 | 0 | 0 | 0 | not significant |
| 5495 | GO_PROTEIN_METHYLTRANSFERASE_ACTIVITY                       | -1.02 | 0.39 | 0 | 0 | 0 | not significant |
| 5496 | REACTOME_RHO_GTPASES_ACTIVATE_NADPH_OXIDASES                | -1.02 | 0.39 | 0 | 0 | 0 | not significant |
| 5497 | SENGUPTA_NASOPHARYNGEAL_CARCINOMA_UP                        | -1.02 | 0.39 | 0 | 0 | 0 | not significant |
| 5498 | CHR9Q22                                                     | -1.02 | 0.38 | 0 | 0 | 0 | not significant |
| 5499 | GO_CELL_ADHESION_MEDIATED_BY_INTEGRIN                       | -1.02 | 0.38 | 0 | 0 | 0 | not significant |
| 5500 | GO_CYTOPLASMIC_STRESS_GRANULE                               | -1.02 | 0.38 | 0 | 0 | 0 | not significant |
| 5501 | GO_FILOPODIUM_ASSEMBLY                                      | -1.02 | 0.38 | 0 | 0 | 0 | not significant |
| 5502 | GO_MICROTUBULE_DEPOLYMERIZATION                             | -1.02 | 0.38 | 0 | 0 | 0 | not significant |
| 5503 | GO_NEGATIVE_REGULATION_OF_CALCIIUM_MEDIATED_SIGNALING       | -1.02 | 0.38 | 0 | 0 | 0 | not significant |
| 5504 | GO_NEGATIVE_REGULATION_OF_MITOCHONDRION_ORGANIZATION        | -1.02 | 0.38 | 0 | 0 | 0 | not significant |
| 5505 | GO_PIGMENT_BIOSYNTHETIC_PROCESS                             | -1.02 | 0.38 | 0 | 0 | 0 | not significant |
| 5506 | GO_PIGMENT_METABOLIC_PROCESS                                | -1.02 | 0.38 | 0 | 0 | 0 | not significant |
| 5507 | GO_POSITIVE_REGULATION_OF_CELL_SUBSTRATE_ADHESION           | -1.02 | 0.38 | 0 | 0 | 0 | not significant |
| 5508 | GO_REGULATION_OF_RECEPTOR_RECYCLING                         | -1.02 | 0.38 | 0 | 0 | 0 | not significant |
| 5509 | GO_RESPONSE_TO_ESTROGEN                                     | -1.02 | 0.38 | 0 | 0 | 0 | not significant |
| 5510 | GO_VESICLE_DOCKING                                          | -1.02 | 0.38 | 0 | 0 | 0 | not significant |
| 5511 | HOWLIN_CITED1_TARGETS_1_DN                                  | -1.02 | 0.38 | 0 | 0 | 0 | not significant |
| 5512 | PID_ARF6_DOWNSTREAM_PATHWAY                                 | -1.02 | 0.38 | 0 | 0 | 0 | not significant |
| 5513 | REACTOME_FORMATION_OF_SENESCENCE_ASSOCIATED_HETEROCHRC      | -1.02 | 0.38 | 0 | 0 | 0 | not significant |
| 5514 | REACTOME_NEURODEGENERATIVE_DISEASES                         | -1.02 | 0.38 | 0 | 0 | 0 | not significant |
| 5515 | GO_CARDIAC_VENTRICLE_MORPHOGENESIS                          | -1.02 | 0.37 | 0 | 0 | 0 | not significant |
| 5516 | GO_CLATHRIN_COAT_OF_COATED_PIT                              | -1.02 | 0.37 | 0 | 0 | 0 | not significant |
| 5517 | GO_INSULIN_SECRETION                                        | -1.02 | 0.37 | 0 | 0 | 0 | not significant |
| 5518 | GO_NEGATIVE_REGULATION_OF_TORC1_SIGNALING                   | -1.02 | 0.37 | 0 | 0 | 0 | not significant |
| 5519 | GO_POSITIVE_REGULATION_OF_LEUKOCYTE_ADHESION_TO_VASCULAR    | -1.02 | 0.37 | 0 | 0 | 0 | not significant |
| 5520 | GO_VESICLE_DOCKING_INVOLVED_IN_EXOCYTOSIS                   | -1.02 | 0.37 | 0 | 0 | 0 | not significant |
| 5521 | REACTOME_DEADENYLATION_DEPENDENT_MRNA_DECAY                 | -1.02 | 0.37 | 0 | 0 | 0 | not significant |
| 5522 | STANELLE_E2F1_TARGETS                                       | -1.02 | 0.37 | 0 | 0 | 0 | not significant |
| 5523 | VANDESLUIS_COMMD1_TARGETS_GROUP_4_UP                        | -1.02 | 0.37 | 0 | 0 | 0 | not significant |
| 5524 | ZUCCHI_METASTASIS_UP                                        | -1.02 | 0.37 | 0 | 0 | 0 | not significant |
| 5525 | BIOCARTA_IGF1MOTOR_PATHWAY                                  | -1.02 | 0.36 | 0 | 0 | 0 | not significant |
| 5526 | GO_ARTERY_MORPHOGENESIS                                     | -1.02 | 0.36 | 0 | 0 | 0 | not significant |
| 5527 | GO_EXOCYTYC_PROCESS                                         | -1.02 | 0.36 | 0 | 0 | 0 | not significant |
| 5528 | GO_GLUCAN_CATABOLIC_PROCESS                                 | -1.02 | 0.36 | 0 | 0 | 0 | not significant |
| 5529 | GO_REGULATION_OF_T_CELL_MEDIATED_IMMUNITY                   | -1.02 | 0.36 | 0 | 0 | 0 | not significant |
| 5530 | GO_SEMAPHORIN_RECEPTOR_ACTIVITY                             | -1.02 | 0.36 | 0 | 0 | 0 | not significant |
| 5531 | ICHIBA_GRAFT_VERSUS_HOST_DISEASE_D7_DN                      | -1.02 | 0.36 | 0 | 0 | 0 | not significant |
| 5532 | REACTOME_CHREBP_ACTIVATES_METABOLIC_GENE_EXPRESSION         | -1.02 | 0.36 | 0 | 0 | 0 | not significant |
| 5533 | GO_METALLOCHAPERONE_ACTIVITY                                | -1.02 | 0.35 | 0 | 0 | 0 | not significant |
| 5534 | GO_NK_T_CELL_DIFFERENTIATION                                | -1.02 | 0.35 | 0 | 0 | 0 | not significant |
| 5535 | GO_SEMAPHORIN_PLEXIN_SIGNALING_PATHWAY_INVOLVED_IN_NEURON   | -1.02 | 0.35 | 0 | 0 | 0 | not significant |
| 5536 | GO_ATRIAL_CARDIAC_MUSCLE_CELL_TO_AV_NODE_CELL_SIGNALING     | -1.02 | 0.34 | 0 | 0 | 0 | not significant |
| 5537 | GO_ICOSANOID_RECEPTOR_ACTIVITY                              | -1.02 | 0.34 | 0 | 0 | 0 | not significant |
| 5538 | GO_NEGATIVE_REGULATION_OF_PROTEIN_IMPORT_INTO_NUCLEUS       | -1.02 | 0.34 | 0 | 0 | 0 | not significant |
| 5539 | GO_POSITIVE_REGULATION_OF_CELL_MATURATION                   | -1.02 | 0.34 | 0 | 0 | 0 | not significant |
| 5540 | LEIN_MIDBRAIN_MARKERS                                       | -1.02 | 0.34 | 0 | 0 | 0 | not significant |
| 5541 | GO_AXON_INITIAL_SEGMENT                                     | -1.02 | 0.33 | 0 | 0 | 0 | not significant |
| 5542 | GO_CARDIAC_LEFT_VENTRICLE_MORPHOGENESIS                     | -1.02 | 0.33 | 0 | 0 | 0 | not significant |
| 5543 | GO_REGULATION_OF_NEUROTROPHIN_TRK_RECEPTOR_SIGNALING PA     | -1.02 | 0.33 | 0 | 0 | 0 | not significant |
| 5544 | GO_ACTIN_BASED_CELL_PROJECTION                              | -1.01 | 0.42 | 0 | 0 | 0 | not significant |
| 5545 | GO_TRANSMEMBRANE_TRANSPORTER_ACTIVITY                       | -1.01 | 0.42 | 0 | 0 | 0 | not significant |
| 5546 | CHR12Q13                                                    | -1.01 | 0.40 | 0 | 0 | 0 | not significant |
| 5547 | GO_REGULATION_OF_ORGAN_GROWTH                               | -1.01 | 0.40 | 0 | 0 | 0 | not significant |

|      |                                                            |       |      |   |   |   |                 |
|------|------------------------------------------------------------|-------|------|---|---|---|-----------------|
| 5548 | GO_TUMOR_NECROSIS_FACTOR_RECEPTOR_SUPERFAMILY_BINDING      | -1.01 | 0.40 | 0 | 0 | 0 | not significant |
| 5549 | GO_CELLULAR_MACROMOLECULE_CATABOLIC_PROCESS                | -1.01 | 0.39 | 0 | 0 | 0 | not significant |
| 5550 | GO_INTRINSIC_APOPTOTIC_SIGNALING_PATHWAY                   | -1.01 | 0.39 | 0 | 0 | 0 | not significant |
| 5551 | GO_MAINTENANCE_OF_CELL_NUMBER                              | -1.01 | 0.39 | 0 | 0 | 0 | not significant |
| 5552 | GO_MICROTUBULE_BASED_PROCESS                               | -1.01 | 0.39 | 0 | 0 | 0 | not significant |
| 5553 | JAZAG_TGFB1_SIGNALING_UP                                   | -1.01 | 0.39 | 0 | 0 | 0 | not significant |
| 5554 | JIANG_VHL_TARGETS                                          | -1.01 | 0.39 | 0 | 0 | 0 | not significant |
| 5555 | KEGG_THYROID_CANCER                                        | -1.01 | 0.39 | 0 | 0 | 0 | not significant |
| 5556 | BYSTRYKH_HEMATOPOIESIS_STEM_CELL_AND_BRAIN_QTL_TRANS       | -1.01 | 0.38 | 0 | 0 | 0 | not significant |
| 5557 | GAZDA_DIAMOND_BLACKFAN_ANEMIA_MYELOID_DN                   | -1.01 | 0.38 | 0 | 0 | 0 | not significant |
| 5558 | GO_POSITIVE_REGULATION_OF_APOPTOTIC_SIGNALING_PATHWAY      | -1.01 | 0.38 | 0 | 0 | 0 | not significant |
| 5559 | GO_POSITIVE_REGULATION_OF_CYTOKINE_PRODUCTION_INVOLVED_IN  | -1.01 | 0.38 | 0 | 0 | 0 | not significant |
| 5560 | GO_REGULATION_OF_AMYLOID_PRECURSOR_PROTEIN_CATABOLIC_PR    | -1.01 | 0.38 | 0 | 0 | 0 | not significant |
| 5561 | GO_REGULATION_OF_DEVELOPMENTAL_GROWTH                      | -1.01 | 0.38 | 0 | 0 | 0 | not significant |
| 5562 | GO_REGULATION_OF_SUPRAMOLECULAR_FIBER_ORGANIZATION         | -1.01 | 0.38 | 0 | 0 | 0 | not significant |
| 5563 | GO_SKELETAL_SYSTEM_MORPHOGENESIS                           | -1.01 | 0.38 | 0 | 0 | 0 | not significant |
| 5564 | AMIT_EGF_RESPONSE_480_HELA                                 | -1.01 | 0.37 | 0 | 0 | 0 | not significant |
| 5565 | BIOCARTA_FAS_PATHWAY                                       | -1.01 | 0.37 | 0 | 0 | 0 | not significant |
| 5566 | CROMER_TUMORIGENESIS_DN                                    | -1.01 | 0.37 | 0 | 0 | 0 | not significant |
| 5567 | GO_NEGATIVE_REGULATION_OF_RESPONSE_TO_STIMULUS             | -1.01 | 0.37 | 0 | 0 | 0 | not significant |
| 5568 | GO_REGION_OF_CYTOSOL                                       | -1.01 | 0.37 | 0 | 0 | 0 | not significant |
| 5569 | GO_REGULATION_OF_EXTRINSIC_APOPTOTIC_SIGNALING_PATHWAY_IN  | -1.01 | 0.37 | 0 | 0 | 0 | not significant |
| 5570 | GO_REGULATION_OF_INTRACELLULAR_TRANSPORT                   | -1.01 | 0.37 | 0 | 0 | 0 | not significant |
| 5571 | KEGG_INSULIN_SIGNALING_PATHWAY                             | -1.01 | 0.37 | 0 | 0 | 0 | not significant |
| 5572 | KUNINGER_IGF1_VS_PDGF_TARGETS_DN                           | -1.01 | 0.37 | 0 | 0 | 0 | not significant |
| 5573 | OKUMURA_INFLAMMATORY_RESPONSE_LPS                          | -1.01 | 0.37 | 0 | 0 | 0 | not significant |
| 5574 | PID_VEGFR1_2_PATHWAY                                       | -1.01 | 0.37 | 0 | 0 | 0 | not significant |
| 5575 | RHEIN_ALL_GLUCCORTICOID_THERAPY_UP                         | -1.01 | 0.37 | 0 | 0 | 0 | not significant |
| 5576 | RIGGINS_TAMOXIFEN_RESISTANCE_DN                            | -1.01 | 0.37 | 0 | 0 | 0 | not significant |
| 5577 | TANAKA_METHYLATED_IN_ESOPHAGEAL_CARCINOMA                  | -1.01 | 0.37 | 0 | 0 | 0 | not significant |
| 5578 | BIOCARTA_RAC1_PATHWAY                                      | -1.01 | 0.36 | 0 | 0 | 0 | not significant |
| 5579 | BLUM_RESPONSE_TO_SALIRASIB_UP                              | -1.01 | 0.36 | 0 | 0 | 0 | not significant |
| 5580 | BOYLAN_MULTIPLE_MYELOMA_D_UP                               | -1.01 | 0.36 | 0 | 0 | 0 | not significant |
| 5581 | CHENG_RESPONSE_TO_NICKEL_ACETATE                           | -1.01 | 0.36 | 0 | 0 | 0 | not significant |
| 5582 | CHIARADONNA_NEOPLASTIC_TRANSFORMATION_KRAS_DN              | -1.01 | 0.36 | 0 | 0 | 0 | not significant |
| 5583 | CHR3P25                                                    | -1.01 | 0.36 | 0 | 0 | 0 | not significant |
| 5584 | CHR9Q21                                                    | -1.01 | 0.36 | 0 | 0 | 0 | not significant |
| 5585 | E2F1_UP_V1_DN                                              | -1.01 | 0.36 | 0 | 0 | 0 | not significant |
| 5586 | GO_CATALYTIC_ACTIVITY_ACTING_ON_DNA                        | -1.01 | 0.36 | 0 | 0 | 0 | not significant |
| 5587 | GO_ENDOCARDIUM_DEVELOPMENT                                 | -1.01 | 0.36 | 0 | 0 | 0 | not significant |
| 5588 | GO_NUCLEOBASE_CONTAINING_SMALL_MOLECULE_CATABOLIC_PROCE    | -1.01 | 0.36 | 0 | 0 | 0 | not significant |
| 5589 | GO_NUCLEOSOME_ORGANIZATION                                 | -1.01 | 0.36 | 0 | 0 | 0 | not significant |
| 5590 | GO_POSITIVE_REGULATION_OF_PROTEIN_DEPHOSPHORYLATION        | -1.01 | 0.36 | 0 | 0 | 0 | not significant |
| 5591 | GO_POSITIVE_REGULATION_OF_T_CELL_MIGRATION                 | -1.01 | 0.36 | 0 | 0 | 0 | not significant |
| 5592 | GO_REGULATION_OF_STRIATED_MUSCLE_CELL_DIFFERENTIATION      | -1.01 | 0.36 | 0 | 0 | 0 | not significant |
| 5593 | GO_TAU_PROTEIN_BINDING                                     | -1.01 | 0.36 | 0 | 0 | 0 | not significant |
| 5594 | REACTOME_DNA_DOUBLE_STRAND_BREAK_REPAIR                    | -1.01 | 0.36 | 0 | 0 | 0 | not significant |
| 5595 | REACTOME_TP53_REGULATES_TRANSCRIPTION_OF_CELL_CYCLE_GEN    | -1.01 | 0.36 | 0 | 0 | 0 | not significant |
| 5596 | TSENG_IRS1_TARGETS_DN                                      | -1.01 | 0.36 | 0 | 0 | 0 | not significant |
| 5597 | YAP1_UP                                                    | -1.01 | 0.36 | 0 | 0 | 0 | not significant |
| 5598 | ACEVEDO_FGFR1_TARGETS_IN_PROSTATE_CANCER_MODEL_DN          | -1.01 | 0.35 | 0 | 0 | 0 | not significant |
| 5599 | CASTELLANO_NRAS_TARGETS_DN                                 | -1.01 | 0.35 | 0 | 0 | 0 | not significant |
| 5600 | GO_ALPHA_ACTININ_BINDING                                   | -1.01 | 0.35 | 0 | 0 | 0 | not significant |
| 5601 | GO_COLLAGEN_BIOSYNTHETIC_PROCESS                           | -1.01 | 0.35 | 0 | 0 | 0 | not significant |
| 5602 | GO_DISORDERED_DOMAIN_SPECIFIC_BINDING                      | -1.01 | 0.35 | 0 | 0 | 0 | not significant |
| 5603 | GO_NUCLEAR_TRANSCRIBED_MRNA_CATABOLIC_PROCESS_DEADENYL     | -1.01 | 0.35 | 0 | 0 | 0 | not significant |
| 5604 | GO_POSITIVE_REGULATION_OF_ALPHA_BETA_T_CELL_DIFFERENTIATIO | -1.01 | 0.35 | 0 | 0 | 0 | not significant |
| 5605 | GO_REGULATION_OF_RECEPTOR_BIOSYNTHETIC_PROCESS             | -1.01 | 0.35 | 0 | 0 | 0 | not significant |
| 5606 | GO_RESPONSE_TO_PROSTAGLANDIN                               | -1.01 | 0.35 | 0 | 0 | 0 | not significant |
| 5607 | GO_SEMAPHORIN_RECEPTOR_COMPLEX                             | -1.01 | 0.35 | 0 | 0 | 0 | not significant |
| 5608 | KANNAN_TP53_TARGETS_UP                                     | -1.01 | 0.35 | 0 | 0 | 0 | not significant |
| 5609 | LABBE_TGFB1_TARGETS_DN                                     | -1.01 | 0.35 | 0 | 0 | 0 | not significant |
| 5610 | OUYANG_PROSTATE_CANCER_MARKERS                             | -1.01 | 0.35 | 0 | 0 | 0 | not significant |
| 5611 | PHONG_TNF_RESPONSE_VIA_P38_COMPLETE                        | -1.01 | 0.35 | 0 | 0 | 0 | not significant |
| 5612 | CHR8P21                                                    | -1.01 | 0.34 | 0 | 0 | 0 | not significant |
| 5613 | GCNP_SHH_UP_EARLY_V1_DN                                    | -1.01 | 0.34 | 0 | 0 | 0 | not significant |
| 5614 | GO_COENZYME_CATABOLIC_PROCESS                              | -1.01 | 0.34 | 0 | 0 | 0 | not significant |
| 5615 | GO_ENZYME_LINKED_RECEPTOR_PROTEIN_SIGNALING_PATHWAY        | -1.01 | 0.34 | 0 | 0 | 0 | not significant |
| 5616 | GO_MATING_BEHAVIOR                                         | -1.01 | 0.34 | 0 | 0 | 0 | not significant |
| 5617 | GO_NEGATIVE_REGULATION_OF_PROTEASOMAL_UBIQUITIN_DEPENDEN   | -1.01 | 0.34 | 0 | 0 | 0 | not significant |
| 5618 | GO_NEUROPEPTIDE_RECEPTOR_BINDING                           | -1.01 | 0.34 | 0 | 0 | 0 | not significant |
| 5619 | GO_OXIDOREDUCTASE_ACTIVITY_ACTING_ON_THE_CH_CH_GROUP_OF    | -1.01 | 0.34 | 0 | 0 | 0 | not significant |
| 5620 | GO_POSITIVE_REGULATION_OF_RNA_BINDING                      | -1.01 | 0.34 | 0 | 0 | 0 | not significant |
| 5621 | GO_POSITIVE_REGULATION_OF_RUFFLE_ASSEMBLY                  | -1.01 | 0.34 | 0 | 0 | 0 | not significant |
| 5622 | GO_REGULATION_OF_OOCYTE_MATURATION                         | -1.01 | 0.34 | 0 | 0 | 0 | not significant |
| 5623 | GO_SMOOTH_MUSCLE_CELL_PROLIFERATION                        | -1.01 | 0.34 | 0 | 0 | 0 | not significant |
| 5624 | REACTOME_INTERLEUKIN_17_SIGNALING                          | -1.01 | 0.34 | 0 | 0 | 0 | not significant |
| 5625 | REACTOME_NUCLEAR_EVENTS_KINASE_AND_TRANSCRIPTION_FACTOR    | -1.01 | 0.34 | 0 | 0 | 0 | not significant |
| 5626 | GO_CHLORIDE_ION_BINDING                                    | -1.01 | 0.33 | 0 | 0 | 0 | not significant |
| 5627 | GO_POSITIVE_REGULATION_OF_TYPE_2_IMMUNE_RESPONSE           | -1.01 | 0.33 | 0 | 0 | 0 | not significant |
| 5628 | GO_QUINONE_METABOLIC_PROCESS                               | -1.01 | 0.33 | 0 | 0 | 0 | not significant |
| 5629 | JOHNSTONE_PARVB_TARGETS_2_DN                               | -1.01 | 0.33 | 0 | 0 | 0 | not significant |
| 5630 | KANG_GIST_WITH_PDGFRA_DN                                   | -1.01 | 0.33 | 0 | 0 | 0 | not significant |
| 5631 | REACTOME_SYNTHESIS_SECRETION_AND_DEACYLATION_OF_GHRELIN    | -1.01 | 0.33 | 0 | 0 | 0 | not significant |
| 5632 | GO_POSITIVE_REGULATION_OF_DENDRITIC_CELL_CYTOKINE_PRODUCT  | -1.01 | 0.32 | 0 | 0 | 0 | not significant |
| 5633 | REACTOME_GMP_EFFECTS                                       | -1.01 | 0.32 | 0 | 0 | 0 | not significant |
| 5634 | EPPERT_LSC_R                                               | -1.01 | 0.31 | 0 | 0 | 0 | not significant |
| 5635 | MATZUK_LUTEAL_GENES                                        | -1.01 | 0.30 | 0 | 0 | 0 | not significant |
| 5636 | GO_DNA_DEALKYLATION_INVOLVED_IN_DNA_REPAIR                 | -1.00 | 0.37 | 0 | 0 | 0 | not significant |
| 5637 | GO_POSITIVE_REGULATION_OF_BIOSYNTHETIC_PROCESS             | -1.00 | 0.37 | 0 | 0 | 0 | not significant |
| 5638 | GO_REGULATION_OF_INSULIN_SECRETION                         | -1.00 | 0.37 | 0 | 0 | 0 | not significant |
| 5639 | GO_REGULATION_OF_LONG_TERM_NEURONAL_SYNAPTIC_PLASTICITY    | -1.00 | 0.37 | 0 | 0 | 0 | not significant |
| 5640 | KIM_WT1_TARGETS_8HR_DN                                     | -1.00 | 0.37 | 0 | 0 | 0 | not significant |
| 5641 | BIOCARTA_MTOR_PATHWAY                                      | -1.00 | 0.36 | 0 | 0 | 0 | not significant |
| 5642 | GO_ACTIVIN_RECEPTOR_SIGNALING_PATHWAY                      | -1.00 | 0.36 | 0 | 0 | 0 | not significant |
| 5643 | GO_APOPTOTIC_MITOCHONDRIAL_CHANGES                         | -1.00 | 0.36 | 0 | 0 | 0 | not significant |
| 5644 | GO_CEREBELLAR_CORTEX_DEVELOPMENT                           | -1.00 | 0.36 | 0 | 0 | 0 | not significant |
| 5645 | GO_L_Glutamate_TRANSMEMBRANE_TRANSPORT                     | -1.00 | 0.36 | 0 | 0 | 0 | not significant |
| 5646 | GO_MEMBRANE_FISSION                                        | -1.00 | 0.36 | 0 | 0 | 0 | not significant |
| 5647 | GO_NEURONAL_STEM_CELL_POPULATION_MAINTENANCE               | -1.00 | 0.36 | 0 | 0 | 0 | not significant |
| 5648 | GO_PHOSPHATIDYLINOSITOL_3_KINASE_COMPLEX                   | -1.00 | 0.36 | 0 | 0 | 0 | not significant |
| 5649 | GO_REGULATION_OF_MICROTUBULE_BASED_PROCESS                 | -1.00 | 0.36 | 0 | 0 | 0 | not significant |
| 5650 | GO_TRANSCRIPTION_FACTOR_TFTC_COMPLEX                       | -1.00 | 0.36 | 0 | 0 | 0 | not significant |
| 5651 | GO_TRANSLATION_REPRESSOR_ACTIVITY                          | -1.00 | 0.36 | 0 | 0 | 0 | not significant |
| 5652 | LU_EZH2_TARGETS_UP                                         | -1.00 | 0.36 | 0 | 0 | 0 | not significant |
| 5653 | PID_ENDOTHELIN_PATHWAY                                     | -1.00 | 0.36 | 0 | 0 | 0 | not significant |
| 5654 | REACTOME_DISEASES_OF_METABOLISM                            | -1.00 | 0.36 | 0 | 0 | 0 | not significant |
| 5655 | REACTOME_METABOLIC_DISORDERS_OF_BIOLOGICAL_OXIDATION_ENZ   | -1.00 | 0.36 | 0 | 0 | 0 | not significant |
| 5656 | REACTOME_SIGNALING_BY_VEGF                                 | -1.00 | 0.36 | 0 | 0 | 0 | not significant |

|      |                                                            |       |      |   |   |   |                 |
|------|------------------------------------------------------------|-------|------|---|---|---|-----------------|
| 5657 | REACTOME_ZBP1_DAI_MEDIATED_INDUCTION_OF_TYPE_I_IFNS        | -1.00 | 0.36 | 0 | 0 | 0 | not significant |
| 5658 | RIZ_ERYTHROID_DIFFERENTIATION_CCNE1                        | -1.00 | 0.36 | 0 | 0 | 0 | not significant |
| 5659 | CHR2Q12                                                    | -1.00 | 0.35 | 0 | 0 | 0 | not significant |
| 5660 | GO_NEGATIVE_REGULATION_OF_CELL_SUBSTRATE_ADHESION          | -1.00 | 0.35 | 0 | 0 | 0 | not significant |
| 5661 | GO_NEGATIVE_REGULATION_OF_THYMOCYTE_APOPTOTIC_PROCESS      | -1.00 | 0.35 | 0 | 0 | 0 | not significant |
| 5662 | GO_NEURON_PROJECTION_MAINTENANCE                           | -1.00 | 0.35 | 0 | 0 | 0 | not significant |
| 5663 | GO_POSITIVE_REGULATION_OF_OXIDATIVE_STRESS_INDUCED_CELL_DF | -1.00 | 0.35 | 0 | 0 | 0 | not significant |
| 5664 | GO_REGULATION_OF_CELL_ADHESION_MEDIATED_BY_INTEGRIN        | -1.00 | 0.35 | 0 | 0 | 0 | not significant |
| 5665 | GO_REGULATION_OF_NMDA_RECEPTOR_ACTIVITY                    | -1.00 | 0.35 | 0 | 0 | 0 | not significant |
| 5666 | GO_REGULATION_OF_PERK_MEDIATED_UNFOLDED_PROTEIN_RESPONSE   | -1.00 | 0.35 | 0 | 0 | 0 | not significant |
| 5667 | GO_REGULATION_OF_PROTEIN_DEACETYLATION                     | -1.00 | 0.35 | 0 | 0 | 0 | not significant |
| 5668 | GO_SULFUR_COMPOUND_CATABOLIC_PROCESS                       | -1.00 | 0.35 | 0 | 0 | 0 | not significant |
| 5669 | GROSS_HYPOXIA_VIA_ELK3_ONLY_DN                             | -1.00 | 0.35 | 0 | 0 | 0 | not significant |
| 5670 | KAYO_AGING_MUSCLE_UP                                       | -1.00 | 0.35 | 0 | 0 | 0 | not significant |
| 5671 | NIKOLSKY_BREAST_CANCER_17Q21_Q25_AMPLICON                  | -1.00 | 0.35 | 0 | 0 | 0 | not significant |
| 5672 | BIOCARTA_P35ALZHEIMERS_PATHWAY                             | -1.00 | 0.34 | 0 | 0 | 0 | not significant |
| 5673 | BOCHKIS_FOXA2_TARGETS                                      | -1.00 | 0.34 | 0 | 0 | 0 | not significant |
| 5674 | BOWIE_RESPONSE_TO_EXTRACELLULAR_MATRIX                     | -1.00 | 0.34 | 0 | 0 | 0 | not significant |
| 5675 | BROWNE_HCMV_INFECTION_16HR_UP                              | -1.00 | 0.34 | 0 | 0 | 0 | not significant |
| 5676 | CHR6P22                                                    | -1.00 | 0.34 | 0 | 0 | 0 | not significant |
| 5677 | GO_ACUTE_PHASE_RESPONSE                                    | -1.00 | 0.34 | 0 | 0 | 0 | not significant |
| 5678 | GO_AMINO_ACID_IMPORT                                       | -1.00 | 0.34 | 0 | 0 | 0 | not significant |
| 5679 | GO_CILIARY_BASAL_BODY_PLASMA_MEMBRANE_DOCKING              | -1.00 | 0.34 | 0 | 0 | 0 | not significant |
| 5680 | GO_CORE_MEDIATOR_COMPLEX                                   | -1.00 | 0.34 | 0 | 0 | 0 | not significant |
| 5681 | GO_EYE_PHOTORECEPTOR_CELL_DIFFERENTIATION                  | -1.00 | 0.34 | 0 | 0 | 0 | not significant |
| 5682 | GO_HORMONE_BIOSYNTHETIC_PROCESS                            | -1.00 | 0.34 | 0 | 0 | 0 | not significant |
| 5683 | GO_NEGATIVE_REGULATION_OF_CELL_DIVISION                    | -1.00 | 0.34 | 0 | 0 | 0 | not significant |
| 5684 | GO_NEGATIVE_REGULATION_OF_DNA_TEMPLATED_TRANSCRIPTION_EL   | -1.00 | 0.34 | 0 | 0 | 0 | not significant |
| 5685 | GO_NUCLEAR_OUTER_MEMBRANE_ENDOPLASMIC_RETICULUM_MEMBRANE   | -1.00 | 0.34 | 0 | 0 | 0 | not significant |
| 5686 | GO_NUCLEOTIDE_PHOSPHORYLATION                              | -1.00 | 0.34 | 0 | 0 | 0 | not significant |
| 5687 | GO_ORGANIC_HYDROXY_COMPOUND_TRANSPORT                      | -1.00 | 0.34 | 0 | 0 | 0 | not significant |
| 5688 | GO_PALLIUM_DEVELOPMENT                                     | -1.00 | 0.34 | 0 | 0 | 0 | not significant |
| 5689 | GO_POSITIVE_REGULATION_OF_RECEPTOR_RECYCLING               | -1.00 | 0.34 | 0 | 0 | 0 | not significant |
| 5690 | GO_REGULATION_OF_ENDOPLASMIC_RETICULUM_UNFOLDED_PROTEIN    | -1.00 | 0.34 | 0 | 0 | 0 | not significant |
| 5691 | GO_SKIN_DEVELOPMENT                                        | -1.00 | 0.34 | 0 | 0 | 0 | not significant |
| 5692 | GO_SNAP_RECEPTOR_ACTIVITY                                  | -1.00 | 0.34 | 0 | 0 | 0 | not significant |
| 5693 | GO_TOR_COMPLEX                                             | -1.00 | 0.34 | 0 | 0 | 0 | not significant |
| 5694 | KEGG_SULFUR_METABOLISM                                     | -1.00 | 0.34 | 0 | 0 | 0 | not significant |
| 5695 | REACTOME_PURINE_CATABOLISM                                 | -1.00 | 0.34 | 0 | 0 | 0 | not significant |
| 5696 | STEIN_ESTROGEN_RESPONSE_NOT_VIA_ESRRA                      | -1.00 | 0.34 | 0 | 0 | 0 | not significant |
| 5697 | CHR5Q31                                                    | -1.00 | 0.33 | 0 | 0 | 0 | not significant |
| 5698 | GO_DRUG_TRANSMEMBRANE_TRANSPORTER_ACTIVITY                 | -1.00 | 0.33 | 0 | 0 | 0 | not significant |
| 5699 | GO_LEADING_EDGE_MEMBRANE                                   | -1.00 | 0.33 | 0 | 0 | 0 | not significant |
| 5700 | GO_NEGATIVE_REGULATION_OF_EPITHELIAL_CELL_PROLIFERATION_IN | -1.00 | 0.33 | 0 | 0 | 0 | not significant |
| 5701 | GO_POSITIVE_REGULATION_OF_T_CELL_CYTOKINE_PRODUCTION       | -1.00 | 0.33 | 0 | 0 | 0 | not significant |
| 5702 | GO_PROTON_EXPORTING_ATPASE_ACTIVITY_PHOSPHORYLATIVE_MECH   | -1.00 | 0.33 | 0 | 0 | 0 | not significant |
| 5703 | GO_PROTOPORPHYRINOGEN_IX_BIOSYNTHETIC_PROCESS              | -1.00 | 0.33 | 0 | 0 | 0 | not significant |
| 5704 | GO_REGULATION_OF_NUCLEAR_DIVISION                          | -1.00 | 0.33 | 0 | 0 | 0 | not significant |
| 5705 | GO_RNA_7_METHYLGUANOSINE_CAP_BINDING                       | -1.00 | 0.33 | 0 | 0 | 0 | not significant |
| 5706 | GO_TRANS_GOLGI_NETWORK_TRANSPORT_VESICLE_MEMBRANE          | -1.00 | 0.33 | 0 | 0 | 0 | not significant |
| 5707 | MIKHAYLOVA_OXIDATIVE_STRESS_RESPONSE_VIA_VHL_UP            | -1.00 | 0.33 | 0 | 0 | 0 | not significant |
| 5708 | PID_CMYB_PATHWAY                                           | -1.00 | 0.33 | 0 | 0 | 0 | not significant |
| 5709 | REACTOME_CTLA4_INHIBITORY_SIGNALING                        | -1.00 | 0.33 | 0 | 0 | 0 | not significant |
| 5710 | REACTOME_PHASE_I_FUNCTIONALIZATION_OF_COMPOUNDS            | -1.00 | 0.33 | 0 | 0 | 0 | not significant |
| 5711 | GO_AP_3_ADAPTOR_COMPLEX                                    | -1.00 | 0.32 | 0 | 0 | 0 | not significant |
| 5712 | GO_CRANIAL_SUTURE_MORPHOGENESIS                            | -1.00 | 0.32 | 0 | 0 | 0 | not significant |
| 5713 | GO_POSITIVE_REGULATION_OF_MACROPHAGE_ACTIVATION            | -1.00 | 0.32 | 0 | 0 | 0 | not significant |
| 5714 | GO_PYRIMIDINE_NUCLEOSIDE_CATABOLIC_PROCESS                 | -1.00 | 0.32 | 0 | 0 | 0 | not significant |
| 5715 | GO_REGULATION_OF_CELL_PROJECTION_ORGANIZATION              | -1.00 | 0.32 | 0 | 0 | 0 | not significant |
| 5716 | GO_RNA_CAP_BINDING_COMPLEX                                 | -1.00 | 0.32 | 0 | 0 | 0 | not significant |
| 5717 | MARSON_BOUND_BY_FOXP3_STIMULATED                           | -1.00 | 0.32 | 0 | 0 | 0 | not significant |
| 5718 | PURBEY_TARGETS_OF_CTBP1_NOT_SATB1_DN                       | -1.00 | 0.32 | 0 | 0 | 0 | not significant |
| 5719 | REACTOME_DAP12_SIGNALING                                   | -1.00 | 0.32 | 0 | 0 | 0 | not significant |
| 5720 | ZHU_SKIL_TARGETS_UP                                        | -1.00 | 0.32 | 0 | 0 | 0 | not significant |
| 5721 | GO_CALMODULIN_DEPENDENT_PROTEIN_PHOSPHATASE_ACTIVITY       | -1.00 | 0.31 | 0 | 0 | 0 | not significant |
| 5722 | GO_CAMERA_TYPE_EYE_DEVELOPMENT                             | -1.00 | 0.31 | 0 | 0 | 0 | not significant |
| 5723 | GO_ANDROGEN_BIOSYNTHETIC_PROCESS                           | -1.00 | 0.30 | 0 | 0 | 0 | not significant |
| 5724 | PID_ANGIOPHOTIN_RECEPTOR_PATHWAY                           | -0.99 | 0.37 | 0 | 0 | 0 | not significant |
| 5725 | CHR4Q24                                                    | -0.99 | 0.36 | 0 | 0 | 0 | not significant |
| 5726 | GO_POSITIVE_REGULATION_OF_STRESS_ACTIVATED_PROTEIN_KINASE  | -0.99 | 0.36 | 0 | 0 | 0 | not significant |
| 5727 | REACTOME_APOPTOTIC_FACTOR_MEDIATED_RESPONSE                | -0.99 | 0.36 | 0 | 0 | 0 | not significant |
| 5728 | THILLAINADESAN_ZNF217_TARGETS_UP                           | -0.99 | 0.36 | 0 | 0 | 0 | not significant |
| 5729 | EPPERT_HSC_R                                               | -0.99 | 0.35 | 0 | 0 | 0 | not significant |
| 5730 | GO_POSITIVE_REGULATION_OF_CELL_MATRIX_ADHESION             | -0.99 | 0.35 | 0 | 0 | 0 | not significant |
| 5731 | GO_POSITIVE_REGULATION_OF_LEUKOCYTE_APOPTOTIC_PROCESS      | -0.99 | 0.35 | 0 | 0 | 0 | not significant |
| 5732 | GO_REGULATION_OF_T_CELL_RECEPTOR_SIGNALING_PATHWAY         | -0.99 | 0.35 | 0 | 0 | 0 | not significant |
| 5733 | AYAR_COBRA1_TARGETS_DN                                     | -0.99 | 0.34 | 0 | 0 | 0 | not significant |
| 5734 | BILBAN_B_CLL_LPL_UP                                        | -0.99 | 0.34 | 0 | 0 | 0 | not significant |
| 5735 | FRASOR_RESPONSE_TO ESTRADIOL_UP                            | -0.99 | 0.34 | 0 | 0 | 0 | not significant |
| 5736 | GLI1_UP.V1_UP                                              | -0.99 | 0.34 | 0 | 0 | 0 | not significant |
| 5737 | GO_APOPTOTIC_CELL_CLEARANCE                                | -0.99 | 0.34 | 0 | 0 | 0 | not significant |
| 5738 | GO_GLUCCOSE_IMPORT                                         | -0.99 | 0.34 | 0 | 0 | 0 | not significant |
| 5739 | GO_MACROPHAGE_DIFFERENTIATION                              | -0.99 | 0.34 | 0 | 0 | 0 | not significant |
| 5740 | GO_RESPONSE_TO_AXON_INJURY                                 | -0.99 | 0.34 | 0 | 0 | 0 | not significant |
| 5741 | GO_RESPONSE_TO_IRON_ION                                    | -0.99 | 0.34 | 0 | 0 | 0 | not significant |
| 5742 | GO_RNA_POLYADENYLATION                                     | -0.99 | 0.34 | 0 | 0 | 0 | not significant |
| 5743 | GO_TRANSFORMING_GROWTH_FACTOR_BETA_RECEPTOR_BINDING        | -0.99 | 0.34 | 0 | 0 | 0 | not significant |
| 5744 | GO_VITAMIN_D_BIOSYNTHETIC_PROCESS                          | -0.99 | 0.34 | 0 | 0 | 0 | not significant |
| 5745 | KEGG_GNRH_SIGNALING_PATHWAY                                | -0.99 | 0.34 | 0 | 0 | 0 | not significant |
| 5746 | KOMMAGANI_TP63_GAMMA_TARGETS                               | -0.99 | 0.34 | 0 | 0 | 0 | not significant |
| 5747 | REACTOME_INTEGRIN_SIGNALING                                | -0.99 | 0.34 | 0 | 0 | 0 | not significant |
| 5748 | REACTOME_RA_BIOSYNTHESIS_PATHWAY                           | -0.99 | 0.34 | 0 | 0 | 0 | not significant |
| 5749 | TONG_INTERACT_WITH_PTTG1                                   | -0.99 | 0.34 | 0 | 0 | 0 | not significant |
| 5750 | WU_HBX_TARGETS_1_DN                                        | -0.99 | 0.34 | 0 | 0 | 0 | not significant |
| 5751 | BIOCARTA_KERATINOCYTE_PATHWAY                              | -0.99 | 0.33 | 0 | 0 | 0 | not significant |
| 5752 | CREIGHTON_ENDOCRINE_THERAPY_RESISTANCE_3                   | -0.99 | 0.33 | 0 | 0 | 0 | not significant |
| 5753 | GO_CELLULAR_LIPID_CATABOLIC_PROCESS                        | -0.99 | 0.33 | 0 | 0 | 0 | not significant |
| 5754 | GO_INTERLEUKIN_1_RECEPTOR_BINDING                          | -0.99 | 0.33 | 0 | 0 | 0 | not significant |
| 5755 | GO_LAMININ_BINDING                                         | -0.99 | 0.33 | 0 | 0 | 0 | not significant |
| 5756 | GO_NEGATIVE_REGULATION_OF_VIRAL_PROCESS                    | -0.99 | 0.33 | 0 | 0 | 0 | not significant |
| 5757 | GO_POSITIVE_REGULATION_OF_EPIDERMIS_DEVELOPMENT            | -0.99 | 0.33 | 0 | 0 | 0 | not significant |
| 5758 | GO_POSITIVE_REGULATION_OF_PHAGOCYTOSIS                     | -0.99 | 0.33 | 0 | 0 | 0 | not significant |
| 5759 | GO_POSITIVE_REGULATION_OF_PROTEIN_MATURATION               | -0.99 | 0.33 | 0 | 0 | 0 | not significant |
| 5760 | GO_POSITIVE_REGULATION_OF_SMAD_PROTEIN_SIGNAL_TRANSDUCTIVE | -0.99 | 0.33 | 0 | 0 | 0 | not significant |
| 5761 | GO_REGULATION_OF_T_HELPER_CELL_DIFFERENTIATION             | -0.99 | 0.33 | 0 | 0 | 0 | not significant |
| 5762 | GO_RESPONSE_TO_LEUKEMIA_INHIBITORY_FACTOR                  | -0.99 | 0.33 | 0 | 0 | 0 | not significant |
| 5763 | GO_TRACHEA_FORMATION                                       | -0.99 | 0.33 | 0 | 0 | 0 | not significant |
| 5764 | HEIDENBLAD_AMPLIFIED_IN_PANCREATIC_CANCER                  | -0.99 | 0.33 | 0 | 0 | 0 | not significant |
| 5765 | LEE_LIVER_CANCER_MYC_E2F1_DN                               | -0.99 | 0.33 | 0 | 0 | 0 | not significant |

|      |                                                            |       |      |   |   |   |                 |
|------|------------------------------------------------------------|-------|------|---|---|---|-----------------|
| 5766 | PID_MET_PATHWAY                                            | -0.99 | 0.33 | 0 | 0 | 0 | not significant |
| 5767 | REACTOME_DEPOLYMERISATION_OF_THE_NUCLEAR_LAMINA            | -0.99 | 0.33 | 0 | 0 | 0 | not significant |
| 5768 | REACTOME_SUMOYLATION_OF_IMMUNE_RESPONSE_PROTEINS           | -0.99 | 0.33 | 0 | 0 | 0 | not significant |
| 5769 | SCHAEFFER_PROSTATE_DEVELOPMENT_AND_CANCER_BOX4_DN          | -0.99 | 0.33 | 0 | 0 | 0 | not significant |
| 5770 | CHANG_IMMORTALIZED_BY_HPV31_DN                             | -0.99 | 0.32 | 0 | 0 | 0 | not significant |
| 5771 | FONTAINE_FOLLICULAR_THYROID_ADENOMA_DN                     | -0.99 | 0.32 | 0 | 0 | 0 | not significant |
| 5772 | GO_C21_STEROID_HORMONE_METABOLIC_PROCESS                   | -0.99 | 0.32 | 0 | 0 | 0 | not significant |
| 5773 | GO_CELL_CELL_SIGNALING_BY_WNT                              | -0.99 | 0.32 | 0 | 0 | 0 | not significant |
| 5774 | GO_CELL_MIGRATION_INVOLVED_IN_GASTRULATION                 | -0.99 | 0.32 | 0 | 0 | 0 | not significant |
| 5775 | GO_CELLULAR_COPPER_ION_HOMEOSTASIS                         | -0.99 | 0.32 | 0 | 0 | 0 | not significant |
| 5776 | GO_COAGULATION                                             | -0.99 | 0.32 | 0 | 0 | 0 | not significant |
| 5777 | GO_DNA_PACKAGING                                           | -0.99 | 0.32 | 0 | 0 | 0 | not significant |
| 5778 | GO_FOLIC_ACID_METABOLIC_PROCESS                            | -0.99 | 0.32 | 0 | 0 | 0 | not significant |
| 5779 | GO_LIPASE_ACTIVATOR_ACTIVITY                               | -0.99 | 0.32 | 0 | 0 | 0 | not significant |
| 5780 | GO_MLL1_2_COMPLEX                                          | -0.99 | 0.32 | 0 | 0 | 0 | not significant |
| 5781 | GO_NEGATIVE_REGULATION_OF_PROTEIN_CATABOLIC_PROCESS        | -0.99 | 0.32 | 0 | 0 | 0 | not significant |
| 5782 | GO_PATTERN_RECOGNITION_RECEPTOR_SIGNALING_PATHWAY          | -0.99 | 0.32 | 0 | 0 | 0 | not significant |
| 5783 | PID_BETA_CATENIN_NUC_PATHWAY                               | -0.99 | 0.32 | 0 | 0 | 0 | not significant |
| 5784 | REACTOME_MRNA_DECAY_BY_5_TO_3_EXORIBONUCLEASE              | -0.99 | 0.32 | 0 | 0 | 0 | not significant |
| 5785 | REACTOME_PERVASIVE_DEVELOPMENTAL_DISORDERS                 | -0.99 | 0.32 | 0 | 0 | 0 | not significant |
| 5786 | REACTOME_SUMOYLATION_OF_DNA_DAMAGE_RESPONSE_AND_REPAIR     | -0.99 | 0.32 | 0 | 0 | 0 | not significant |
| 5787 | SARTIPY_BLUNTED_BY_INSULIN_RESISTANCE_DN                   | -0.99 | 0.32 | 0 | 0 | 0 | not significant |
| 5788 | GO_INTRACELLULAR_MRNA_LOCALIZATION                         | -0.99 | 0.31 | 0 | 0 | 0 | not significant |
| 5789 | GO_NEGATIVE_REGULATION_OF_MEMBRANE_PROTEIN_ECTODOMAIN_P    | -0.99 | 0.31 | 0 | 0 | 0 | not significant |
| 5790 | GO_POSITIVE_REGULATION_OF_CELL_DIFFERENTIATION             | -0.99 | 0.31 | 0 | 0 | 0 | not significant |
| 5791 | GO_POSITIVE_REGULATION_OF_RELEASE_OF_CYTOCHROME_C_FROM     | -0.99 | 0.31 | 0 | 0 | 0 | not significant |
| 5792 | GO_PROGESTERONE_RECEPTOR_SIGNALING_PATHWAY                 | -0.99 | 0.31 | 0 | 0 | 0 | not significant |
| 5793 | GO_PROSTATE_GLAND_MORPHOGENESIS                            | -0.99 | 0.31 | 0 | 0 | 0 | not significant |
| 5794 | GO_TELOMERE_CAPPING                                        | -0.99 | 0.31 | 0 | 0 | 0 | not significant |
| 5795 | GO_ZYMOGEN_INHIBITION                                      | -0.99 | 0.31 | 0 | 0 | 0 | not significant |
| 5796 | HILLION_HMGATB_TARGETS                                     | -0.99 | 0.31 | 0 | 0 | 0 | not significant |
| 5797 | KANG_DOXORUBICIN_RESISTANCE_DN                             | -0.99 | 0.31 | 0 | 0 | 0 | not significant |
| 5798 | MANTOVANI_VIRAL_GPCR_SIGNALING_DN                          | -0.99 | 0.31 | 0 | 0 | 0 | not significant |
| 5799 | PID_RHODOPSIN_PATHWAY                                      | -0.99 | 0.31 | 0 | 0 | 0 | not significant |
| 5800 | ZHAN_MULTIPLE_MYELOMA_UP                                   | -0.99 | 0.31 | 0 | 0 | 0 | not significant |
| 5801 | GO_AXO_DENDRITIC_TRANSPORT                                 | -0.99 | 0.30 | 0 | 0 | 0 | not significant |
| 5802 | GO_CARBOANATE_DEHYDRATASE_ACTIVITY                         | -0.99 | 0.30 | 0 | 0 | 0 | not significant |
| 5803 | GO_G_PROTEIN_COUPLED_SEROTONIN_RECEPTOR_BINDING            | -0.99 | 0.30 | 0 | 0 | 0 | not significant |
| 5804 | GO_REGULATION_OF_TRANSFERASE_ACTIVITY                      | -0.99 | 0.30 | 0 | 0 | 0 | not significant |
| 5805 | HUMMERICH_BENIGN_SKIN_TUMOR_DN                             | -0.99 | 0.30 | 0 | 0 | 0 | not significant |
| 5806 | SMD_BREAST_CANCER_LUMINAL_A_UP                             | -0.99 | 0.30 | 0 | 0 | 0 | not significant |
| 5807 | GO_NEGATIVE_REGULATION_OF_PHOSPHORUS_METABOLIC_PROCESS     | -0.99 | 0.29 | 0 | 0 | 0 | not significant |
| 5808 | GO_POSITIVE_REGULATION_OF_LEUKOCYTE_DEGRANULATION          | -0.99 | 0.29 | 0 | 0 | 0 | not significant |
| 5809 | LI_WILMS_TUMOR_ANAPLASTIC_DN                               | -0.99 | 0.29 | 0 | 0 | 0 | not significant |
| 5810 | FRASOR_RESPONSE_TO_SERM_OR_FULVESTRANT_DN                  | -0.99 | 0.34 | 0 | 0 | 0 | not significant |
| 5811 | GO_DNA_APURINIC_OR_APYRIMIDINIC_SITE_ENDONUCLEASE_ACTIVITY | -0.98 | 0.34 | 0 | 0 | 0 | not significant |
| 5812 | GO_INTESTINAL_EPITHELIAL_CELL_DEVELOPMENT                  | -0.98 | 0.34 | 0 | 0 | 0 | not significant |
| 5813 | GO_NEGATIVE_REGULATION_OF_CELL_CYCLE_G1_S_PHASE_TRANSITIC  | -0.98 | 0.34 | 0 | 0 | 0 | not significant |
| 5814 | GO_NUCLEAR_PORE_COMPLEX_ASSEMBLY                           | -0.98 | 0.34 | 0 | 0 | 0 | not significant |
| 5815 | GO_PURINE_NUCLEOSIDE_METABOLIC_PROCESS                     | -0.98 | 0.34 | 0 | 0 | 0 | not significant |
| 5816 | GO_REGULATION_OF_T_CELL_MIGRATION                          | -0.98 | 0.34 | 0 | 0 | 0 | not significant |
| 5817 | GO_SODIUM_ION_TRANSMEMBRANE_TRANSPORT                      | -0.98 | 0.34 | 0 | 0 | 0 | not significant |
| 5818 | CHR10P13                                                   | -0.98 | 0.33 | 0 | 0 | 0 | not significant |
| 5819 | CHR2P25                                                    | -0.98 | 0.33 | 0 | 0 | 0 | not significant |
| 5820 | GO_ADA2_GCN5_ADA3_TRANSCRIPTION_ACTIVATOR_COMPLEX          | -0.98 | 0.33 | 0 | 0 | 0 | not significant |
| 5821 | GO_ANTIEN_PROCESSING_AND_PRESENTATION_OF_ENDOGENOUS_AI     | -0.98 | 0.33 | 0 | 0 | 0 | not significant |
| 5822 | GO_GENERAL_TRANSCRIPTION_INITIATION_FACTOR_ACTIVITY        | -0.98 | 0.33 | 0 | 0 | 0 | not significant |
| 5823 | GO_MITOCHONDRIAL_PROTEIN_PROCESSING                        | -0.98 | 0.33 | 0 | 0 | 0 | not significant |
| 5824 | GO_NEURON_DEATH_IN_RESPONSE_TO_OXIDATIVE_STRESS            | -0.98 | 0.33 | 0 | 0 | 0 | not significant |
| 5825 | GO_POSITIVE_REGULATION_OF_FILOPODIUM_ASSEMBLY              | -0.98 | 0.33 | 0 | 0 | 0 | not significant |
| 5826 | GO_POSITIVE_REGULATION_OF_RNA_SPLICING                     | -0.98 | 0.33 | 0 | 0 | 0 | not significant |
| 5827 | GO_POSTREPLICATION_REPAIR                                  | -0.98 | 0.33 | 0 | 0 | 0 | not significant |
| 5828 | GO_RESPONSE_TO_PROSTAGLANDIN_E                             | -0.98 | 0.33 | 0 | 0 | 0 | not significant |
| 5829 | GO_RNA_STEM_LOOP_BINDING                                   | -0.98 | 0.33 | 0 | 0 | 0 | not significant |
| 5830 | LANDIS_ERBB2_BREAST_TUMORS_65_DN                           | -0.98 | 0.33 | 0 | 0 | 0 | not significant |
| 5831 | PID_AVB3_INTEGRIN_PATHWAY                                  | -0.98 | 0.33 | 0 | 0 | 0 | not significant |
| 5832 | AZARE_NEOPLASTIC_TRANSFORMATION_BY_STAT3_UP                | -0.98 | 0.32 | 0 | 0 | 0 | not significant |
| 5833 | CHASSOT_SKIN_WOUND                                         | -0.98 | 0.32 | 0 | 0 | 0 | not significant |
| 5834 | FIGUEROA_AML_METHYLATION_CLUSTER_2_DN                      | -0.98 | 0.32 | 0 | 0 | 0 | not significant |
| 5835 | GO_CELLULAR_RESPONSE_TO_LOW_DENSITY_LIPOPROTEIN_PARTICLE   | -0.98 | 0.32 | 0 | 0 | 0 | not significant |
| 5836 | GO_HISTONE_H4_DEACETYLATION                                | -0.98 | 0.32 | 0 | 0 | 0 | not significant |
| 5837 | GO_INTRINSIC_APOPTOTIC_SIGNALING_PATHWAY_IN_RESPONSE_TO_O  | -0.98 | 0.32 | 0 | 0 | 0 | not significant |
| 5838 | GO_MITOTIC_SISTER_CHROMATID_COHESION                       | -0.98 | 0.32 | 0 | 0 | 0 | not significant |
| 5839 | GO_NEGATIVE_REGULATION_OF_ION_TRANSPORT                    | -0.98 | 0.32 | 0 | 0 | 0 | not significant |
| 5840 | GO_NEGATIVE_REGULATION_OF_TRANSCRIPTION_ELONGATION_FROM    | -0.98 | 0.32 | 0 | 0 | 0 | not significant |
| 5841 | GO_NEUROTRANSMITTER_BIOSYNTHETIC_PROCESS                   | -0.98 | 0.32 | 0 | 0 | 0 | not significant |
| 5842 | GO_OUTFLOW_TRACT_SEPTUM_MORPHOGENESIS                      | -0.98 | 0.32 | 0 | 0 | 0 | not significant |
| 5843 | GO_POSITIVE_REGULATION_OF_EPITHELIAL_TO_MESENCHYMAL_TRANS  | -0.98 | 0.32 | 0 | 0 | 0 | not significant |
| 5844 | GO_POSITIVE_REGULATION_OF_MITOCHONDRIAL_OUTER_MEMBRANE_F   | -0.98 | 0.32 | 0 | 0 | 0 | not significant |
| 5845 | GO_PROTON_TRANSPORTING_TWO_SECTOR_ATPASE_COMPLEX_ASSE      | -0.98 | 0.32 | 0 | 0 | 0 | not significant |
| 5846 | GO_REGULATION_OF_HEART_MORPHOGENESIS                       | -0.98 | 0.32 | 0 | 0 | 0 | not significant |
| 5847 | GO_REGULATION_OF_MEIOTIC_CELL_CYCLE                        | -0.98 | 0.32 | 0 | 0 | 0 | not significant |
| 5848 | GO_REGULATION_OF_TRANSCRIPTION_FROM_RNA_POLYMERASE_II_PR   | -0.98 | 0.32 | 0 | 0 | 0 | not significant |
| 5849 | KAUFFMANN_DNA_REPLICATION_GENES                            | -0.98 | 0.32 | 0 | 0 | 0 | not significant |
| 5850 | MANN_RESPONSE_TO_AMIFOSTINE_UP                             | -0.98 | 0.32 | 0 | 0 | 0 | not significant |
| 5851 | PIEPOLI_LG1I_TARGETS_DN                                    | -0.98 | 0.32 | 0 | 0 | 0 | not significant |
| 5852 | REACTOME_NUCLEOTIDE_SALVAGE                                | -0.98 | 0.32 | 0 | 0 | 0 | not significant |
| 5853 | REACTOME_SHC_MEDIATED_CASCADE:FGFR4                        | -0.98 | 0.32 | 0 | 0 | 0 | not significant |
| 5854 | ROYLANCE_BREAST_CANCER_16Q_COPY_NUMBER_UP                  | -0.98 | 0.32 | 0 | 0 | 0 | not significant |
| 5855 | BOYALULT_LIVER_CANCER_SUBCLASS_G6_DN                       | -0.98 | 0.31 | 0 | 0 | 0 | not significant |
| 5856 | DACOSTA_UV_RESPONSE_VIA_ERCC3_TTD_UP                       | -0.98 | 0.31 | 0 | 0 | 0 | not significant |
| 5857 | GO_CORONARY_VASCULATURE_DEVELOPMENT                        | -0.98 | 0.31 | 0 | 0 | 0 | not significant |
| 5858 | GO_OXIDOREDUCTASE_ACTIVITY_ACTING_ON_THE_CH_NH2_GROUP_OF   | -0.98 | 0.31 | 0 | 0 | 0 | not significant |
| 5859 | GO_POSITIVE_REGULATION_OF_INTERLEUKIN_6_PRODUCTION         | -0.98 | 0.31 | 0 | 0 | 0 | not significant |
| 5860 | GO_POSITIVE_REGULATION_OF_PROTEIN_DEACETYLATION            | -0.98 | 0.31 | 0 | 0 | 0 | not significant |
| 5861 | GO_PROSTANOID_RECEPTOR_ACTIVITY                            | -0.98 | 0.31 | 0 | 0 | 0 | not significant |
| 5862 | GO_PROTEIN_LOCALIZATION_TO_CELL_PERIPHERY                  | -0.98 | 0.31 | 0 | 0 | 0 | not significant |
| 5863 | GO_REGULATION_OF_DNA_DAMAGE_RESPONSE_SIGNAL_TRANSDUCTIC    | -0.98 | 0.31 | 0 | 0 | 0 | not significant |
| 5864 | GO_REGULATION_OF_NUCLEAR_TRANSCRIBED_MRNA_POLY_A_TAIL_SF   | -0.98 | 0.31 | 0 | 0 | 0 | not significant |
| 5865 | GO_REGULATION_OF_PHOSPHATASE_ACTIVITY                      | -0.98 | 0.31 | 0 | 0 | 0 | not significant |
| 5866 | MARKEY_RB1_CHRONIC_LOF_DN                                  | -0.98 | 0.31 | 0 | 0 | 0 | not significant |
| 5867 | PID_MTOR_4PATHWAY                                          | -0.98 | 0.31 | 0 | 0 | 0 | not significant |
| 5868 | REACTOME_FBXW7_MUTANTS_AND_NOTCH1_IN_CANCER                | -0.98 | 0.31 | 0 | 0 | 0 | not significant |
| 5869 | REACTOME_TP53_REGULATES_TRANSCRIPTION_OF_CELL_DEATH_GEN    | -0.98 | 0.31 | 0 | 0 | 0 | not significant |
| 5870 | GENTILE_UV_RESPONSE_CLUSTER_D7                             | -0.98 | 0.30 | 0 | 0 | 0 | not significant |
| 5871 | GO ASPARTATE FAMILY AMINO ACID CATABOLIC PROCESS           | -0.98 | 0.30 | 0 | 0 | 0 | not significant |
| 5872 | GO_CAMERA_TYPE_EYE_MORPHOGENESIS                           | -0.98 | 0.30 | 0 | 0 | 0 | not significant |
| 5873 | GO_CELLULAR_RESPONSE_TO_RADIATION                          | -0.98 | 0.30 | 0 | 0 | 0 | not significant |
| 5874 | GO_COPPER_CHAPERONE_ACTIVITY                               | -0.98 | 0.30 | 0 | 0 | 0 | not significant |

|      |                                                           |       |      |   |   |   |                 |
|------|-----------------------------------------------------------|-------|------|---|---|---|-----------------|
| 5875 | GO_MODIFICATION_OF_POSTSYNAPTIC_ACTIN_CYTOSKELETON        | -0.98 | 0.30 | 0 | 0 | 0 | not significant |
| 5876 | GO_NEGATIVE_REGULATION_OF_CYSTEINE_TYPE_ENDOPEPTIDASE_AC  | -0.98 | 0.30 | 0 | 0 | 0 | not significant |
| 5877 | GO_NEGATIVE_REGULATION_OF_KINASE_ACTIVITY                 | -0.98 | 0.30 | 0 | 0 | 0 | not significant |
| 5878 | GO_NEGATIVE_REGULATION_OF_PHOSPHORYLATION                 | -0.98 | 0.30 | 0 | 0 | 0 | not significant |
| 5879 | GO_REGULATION_OF_GLUCCORTICOID_RECEPTOR_SIGNALING_PATH    | -0.98 | 0.30 | 0 | 0 | 0 | not significant |
| 5880 | GO_SULFURIC_ESTER_HYDROLASE_ACTIVITY                      | -0.98 | 0.30 | 0 | 0 | 0 | not significant |
| 5881 | GO_TORC1_COMPLEX                                          | -0.98 | 0.30 | 0 | 0 | 0 | not significant |
| 5882 | GO_TRANSCRIPTION_FACTOR_TFIIF_HOLO_COMPLEX                | -0.98 | 0.30 | 0 | 0 | 0 | not significant |
| 5883 | GO_TRANSPORT_VESICLE_MEMBRANE                             | -0.98 | 0.30 | 0 | 0 | 0 | not significant |
| 5884 | HASLINGER_B_CLL_WITH_MUTATED_VH_GENES                     | -0.98 | 0.30 | 0 | 0 | 0 | not significant |
| 5885 | ONDER_CDH1_TARGETS_2_UP                                   | -0.98 | 0.30 | 0 | 0 | 0 | not significant |
| 5886 | REACTOME_SHC_MEDIATED_CASCADE:FGFR2                       | -0.98 | 0.30 | 0 | 0 | 0 | not significant |
| 5887 | SA_G1_AND_S_PHASES                                        | -0.98 | 0.30 | 0 | 0 | 0 | not significant |
| 5888 | SESTO_RESPONSE_TO_UV_C8                                   | -0.98 | 0.30 | 0 | 0 | 0 | not significant |
| 5889 | GO_ALDEHYDE_BIOSYNTHETIC_PROCESS                          | -0.98 | 0.29 | 0 | 0 | 0 | not significant |
| 5890 | GO_FOREBRAIN_RADIAL_GLIAL_CELL_DIFFERENTIATION            | -0.98 | 0.29 | 0 | 0 | 0 | not significant |
| 5891 | GO_NEDD8_TRANSFERASE_ACTIVITY                             | -0.98 | 0.29 | 0 | 0 | 0 | not significant |
| 5892 | GO_PHOTORECEPTOR_CELL_DEVELOPMENT                         | -0.98 | 0.29 | 0 | 0 | 0 | not significant |
| 5893 | GO_REGULATION_OF_IRE1_MEDIATED_UNFOLDED_PROTEIN_RESPONSE  | -0.98 | 0.29 | 0 | 0 | 0 | not significant |
| 5894 | GO_REGULATION_OF_LEUKOCYTE_ADHESION_TO_VASCULAR_ENDOTHI   | -0.98 | 0.29 | 0 | 0 | 0 | not significant |
| 5895 | LOPEZ_MESOTHELIOMA_SURVIVAL_DN                            | -0.98 | 0.29 | 0 | 0 | 0 | not significant |
| 5896 | TGFB_UP.V1_UP                                             | -0.98 | 0.29 | 0 | 0 | 0 | not significant |
| 5897 | ZHOU_INFLAMMATORY_RESPONSE_LIVE_UP                        | -0.98 | 0.29 | 0 | 0 | 0 | not significant |
| 5898 | GO_BEHAVIOR                                               | -0.98 | 0.28 | 0 | 0 | 0 | not significant |
| 5899 | GO_CARBOHYDRATE_METABOLIC_PROCESS                         | -0.98 | 0.28 | 0 | 0 | 0 | not significant |
| 5900 | GO_MESENCHYMAL_CELL_DIFFERENTIATION                       | -0.98 | 0.28 | 0 | 0 | 0 | not significant |
| 5901 | GO_NEGATIVE_REGULATION_OF_CATABOLIC_PROCESS               | -0.98 | 0.28 | 0 | 0 | 0 | not significant |
| 5902 | GO_REGULATION_OF_NEURON_PROJECTION_DEVELOPMENT            | -0.98 | 0.28 | 0 | 0 | 0 | not significant |
| 5903 | GO_RIBONUCLEOSIDE_MONOPHOSPHATE_BIOSYNTHETIC_PROCESS      | -0.98 | 0.28 | 0 | 0 | 0 | not significant |
| 5904 | GO_TOR_SIGNALING                                          | -0.98 | 0.28 | 0 | 0 | 0 | not significant |
| 5905 | REACTOME_METABOLISM_OF_NUCLEOTIDES                        | -0.98 | 0.28 | 0 | 0 | 0 | not significant |
| 5906 | WANG_RESPONSE_TO_ANDROGEN_UP                              | -0.98 | 0.28 | 0 | 0 | 0 | not significant |
| 5907 | GO_REGULATION_OF_CELLULAR_COMPONENT_SIZE                  | -0.98 | 0.27 | 0 | 0 | 0 | not significant |
| 5908 | ZHANG_RESPONSE_TO_IKK_INHIBITOR_AND_TNF_DN                | -0.98 | 0.27 | 0 | 0 | 0 | not significant |
| 5909 | GO_RESPONSE_TO_RADIATION                                  | -0.98 | 0.26 | 0 | 0 | 0 | not significant |
| 5910 | GO_POSITIVE_REGULATION_OF_DEVELOPMENTAL_PROCESS           | -0.98 | 0.25 | 0 | 0 | 0 | not significant |
| 5911 | GO_NEURON_PROJECTION                                      | -0.98 | 0.24 | 0 | 0 | 0 | not significant |
| 5912 | GO_POSITIVE_REGULATION_OF_ORGANELLE_ORGANIZATION          | -0.98 | 0.23 | 0 | 0 | 0 | not significant |
| 5913 | GO_POSITIVE_REGULATION_OF_PHOSPHORUS_METABOLIC_PROCESS    | -0.98 | 0.18 | 0 | 0 | 0 | not significant |
| 5914 | GO_INTRACELLULAR_TRANSPORT                                | -0.98 | 0.15 | 0 | 0 | 0 | not significant |
| 5915 | GO_CYTOPLASMIC_DYNEIN_COMPLEX                             | -0.97 | 0.34 | 0 | 0 | 0 | not significant |
| 5916 | PARK_TRETINOLIN_RESPONSE_AND_PML_RARA_FUSION              | -0.97 | 0.34 | 0 | 0 | 0 | not significant |
| 5917 | GO_REGULATION_OF_BLOOD_PRESSURE                           | -0.97 | 0.33 | 0 | 0 | 0 | not significant |
| 5918 | CHEOK_RESPONSE_TO_MERCAPTOPURINE_UP                       | -0.97 | 0.32 | 0 | 0 | 0 | not significant |
| 5919 | GO_ATPASE_ACTIVITY_COUPLED_TO_MOVEMENT_OF_SUBSTANCES      | -0.97 | 0.32 | 0 | 0 | 0 | not significant |
| 5920 | GO_POSITIVE_REGULATION_OF_TRANSCRIPTION_ELONGATION_FROM_I | -0.97 | 0.32 | 0 | 0 | 0 | not significant |
| 5921 | GO_REGULATION_OF_EPIDERMAL_CELL_DIFFERENTIATION           | -0.97 | 0.32 | 0 | 0 | 0 | not significant |
| 5922 | REACTOME_PRE_NOTCH_EXPRESSION_AND_PROCESSING              | -0.97 | 0.32 | 0 | 0 | 0 | not significant |
| 5923 | REACTOME_WNT5A_DEPENDENT_INTERNALIZATION_OF_FZD4          | -0.97 | 0.32 | 0 | 0 | 0 | not significant |
| 5924 | GO_ACETYL_COA_METABOLIC_PROCESS                           | -0.97 | 0.31 | 0 | 0 | 0 | not significant |
| 5925 | GO_CHROMOCENTER                                           | -0.97 | 0.31 | 0 | 0 | 0 | not significant |
| 5926 | GO_FOREBRAIN_REGIONALIZATION                              | -0.97 | 0.31 | 0 | 0 | 0 | not significant |
| 5927 | GO_GLIAL_CELL_PROLIFERATION                               | -0.97 | 0.31 | 0 | 0 | 0 | not significant |
| 5928 | GO_IRON_SULFUR_CLUSTER_ASSEMBLY                           | -0.97 | 0.31 | 0 | 0 | 0 | not significant |
| 5929 | GO_NEGATIVE_REGULATION_OF_CELLULAR_PROTEIN_CATABOLIC_PRC  | -0.97 | 0.31 | 0 | 0 | 0 | not significant |
| 5930 | GO_NEGATIVE_REGULATION_OF_INTRACELLULAR_PROTEIN_TRANSPOR  | -0.97 | 0.31 | 0 | 0 | 0 | not significant |
| 5931 | GO_NEGATIVE_REGULATION_OF_MICROTUBULE_POLYMERIZATION_OR   | -0.97 | 0.31 | 0 | 0 | 0 | not significant |
| 5932 | GO_POSITIVE_REGULATION_OF_LEUKOCYTE_CHEMOTAXIS            | -0.97 | 0.31 | 0 | 0 | 0 | not significant |
| 5933 | GO_POSITIVE_REGULATION_OF_RESPONSE_TO_OXIDATIVE_STRESS    | -0.97 | 0.31 | 0 | 0 | 0 | not significant |
| 5934 | GO_POSITIVE_REGULATION_OF_SUPRAMOLECULAR_FIBER_ORGANIZAT  | -0.97 | 0.31 | 0 | 0 | 0 | not significant |
| 5935 | GO_RENAL_SYSTEM_PROCESS                                   | -0.97 | 0.31 | 0 | 0 | 0 | not significant |
| 5936 | GO_TRANSMEMBRANE_RECEPTOR_PROTEIN_TYROSINE_KINASE_ADAPT   | -0.97 | 0.31 | 0 | 0 | 0 | not significant |
| 5937 | OZANNE_API1_TARGETS_UP                                    | -0.97 | 0.31 | 0 | 0 | 0 | not significant |
| 5938 | PID_SYNDECAN_1_PATHWAY                                    | -0.97 | 0.31 | 0 | 0 | 0 | not significant |
| 5939 | REACTOME_FREE_FATTY_ACIDS_REGULATE_INSULIN_SECRETION      | -0.97 | 0.31 | 0 | 0 | 0 | not significant |
| 5940 | REACTOME_PTK6_REGULATES_RHO_GTPASES_RAS_GTPASE_AND_MAF    | -0.97 | 0.31 | 0 | 0 | 0 | not significant |
| 5941 | REACTOME_TOLL_LIKE_RECEPTOR_4_TLR4_CASCADE                | -0.97 | 0.31 | 0 | 0 | 0 | not significant |
| 5942 | YANG_BREAST_CANCER_ESR1_BULK_UP                           | -0.97 | 0.31 | 0 | 0 | 0 | not significant |
| 5943 | BIOCARTA_RELA_PATHWAY                                     | -0.97 | 0.30 | 0 | 0 | 0 | not significant |
| 5944 | BIOCARTA_TEL_PATHWAY                                      | -0.97 | 0.30 | 0 | 0 | 0 | not significant |
| 5945 | CAIRO_LIVER_DEVELOPMENT_UP                                | -0.97 | 0.30 | 0 | 0 | 0 | not significant |
| 5946 | CHR4Q27                                                   | -0.97 | 0.30 | 0 | 0 | 0 | not significant |
| 5947 | GALINDO_IMMUNE_RESPONSE_TO_ENTEROTOXIN                    | -0.97 | 0.30 | 0 | 0 | 0 | not significant |
| 5948 | GO_ASPARTATE_FAMILY_AMINO_ACID_METABOLIC_PROCESS          | -0.97 | 0.30 | 0 | 0 | 0 | not significant |
| 5949 | GO_BLOOD_COAGULATION_INTRINSIC_PATHWAY                    | -0.97 | 0.30 | 0 | 0 | 0 | not significant |
| 5950 | GO_CAP_INDEPENDENT_TRANSLATIONAL_INITIATION               | -0.97 | 0.30 | 0 | 0 | 0 | not significant |
| 5951 | GO_ESTABLISHMENT_OF_LYMPHOCYTE_POLARITY                   | -0.97 | 0.30 | 0 | 0 | 0 | not significant |
| 5952 | GO_INOSITOL_METABOLIC_PROCESS                             | -0.97 | 0.30 | 0 | 0 | 0 | not significant |
| 5953 | GO_NEGATIVE_REGULATION_OF_ANTIGEN_RECEPTOR_MEDIATED_SIGN  | -0.97 | 0.30 | 0 | 0 | 0 | not significant |
| 5954 | GO_POSITIVE_REGULATION_OF_MYOBlast_DIFFERENTIATION        | -0.97 | 0.30 | 0 | 0 | 0 | not significant |
| 5955 | GO_POSITIVE_REGULATION_OF_PROTEIN_SUMOYLATION             | -0.97 | 0.30 | 0 | 0 | 0 | not significant |
| 5956 | GO_REGULATION_OF_PROTEIN_AUTOPHOSPHORYLATION              | -0.97 | 0.30 | 0 | 0 | 0 | not significant |
| 5957 | GO_REGULATION_OF_PROTEIN_TARGETING                        | -0.97 | 0.30 | 0 | 0 | 0 | not significant |
| 5958 | GO_RESPONSE_TO_GROWTH_HORMONE                             | -0.97 | 0.30 | 0 | 0 | 0 | not significant |
| 5959 | GO_SITE_OF_DOUBLE_STRAND_BREAK                            | -0.97 | 0.30 | 0 | 0 | 0 | not significant |
| 5960 | HAHTOLA_MYCOSIS_FUNGOIDES_CD4_DN                          | -0.97 | 0.30 | 0 | 0 | 0 | not significant |
| 5961 | PID_CERAMIDE_PATHWAY                                      | -0.97 | 0.30 | 0 | 0 | 0 | not significant |
| 5962 | QI_PLASMACYTOMA_DN                                        | -0.97 | 0.30 | 0 | 0 | 0 | not significant |
| 5963 | REACTOME_RIP_MEDIATED_NFKB_ACTIVATION_VIA_ZBP1            | -0.97 | 0.30 | 0 | 0 | 0 | not significant |
| 5964 | TING_SILENCED_BY_DICER                                    | -0.97 | 0.30 | 0 | 0 | 0 | not significant |
| 5965 | VALK_AML_WITH_11Q23_REARRANGED                            | -0.97 | 0.30 | 0 | 0 | 0 | not significant |
| 5966 | WU_HBX_TARGETS_2_DN                                       | -0.97 | 0.30 | 0 | 0 | 0 | not significant |
| 5967 | ALONSO_METASTASIS_DN                                      | -0.97 | 0.29 | 0 | 0 | 0 | not significant |
| 5968 | BROWNE_HCMV_INFECTION_1HR_DN                              | -0.97 | 0.29 | 0 | 0 | 0 | not significant |
| 5969 | CHOI_ATL_STAGE_PREDICTOR                                  | -0.97 | 0.29 | 0 | 0 | 0 | not significant |
| 5970 | GO_BINDING_OF_SPERM_TO_ZONA_PELLUCIDA                     | -0.97 | 0.29 | 0 | 0 | 0 | not significant |
| 5971 | GO_CHROMOSOME_CONDENSATION                                | -0.97 | 0.29 | 0 | 0 | 0 | not significant |
| 5972 | GO_COLUMNAR_CUBOIDAL_EPITHELIAL_CELL_DEVELOPMENT          | -0.97 | 0.29 | 0 | 0 | 0 | not significant |
| 5973 | GO_CORONARY_ARTERY_MORPHOGENESIS                          | -0.97 | 0.29 | 0 | 0 | 0 | not significant |
| 5974 | GO_ENDONUCLEOLYTIC_CLEAVAGE_INVOLVED_IN_RRNA_PROCESSING   | -0.97 | 0.29 | 0 | 0 | 0 | not significant |
| 5975 | GO GLUTAMINE_TRANSPORT                                    | -0.97 | 0.29 | 0 | 0 | 0 | not significant |
| 5976 | GO_NEGATIVE_REGULATION_OF_PEPTIDYL_LYSINE_ACETYLATION     | -0.97 | 0.29 | 0 | 0 | 0 | not significant |
| 5977 | GO_NEURON_REMODELING                                      | -0.97 | 0.29 | 0 | 0 | 0 | not significant |
| 5978 | GO_NITRIC_OXIDE_BIOSYNTHETIC_PROCESS                      | -0.97 | 0.29 | 0 | 0 | 0 | not significant |
| 5979 | GO_POSITIVE_REGULATION_OF_PROTEIN_LOCALIZATION_TO_MEMBRAN | -0.97 | 0.29 | 0 | 0 | 0 | not significant |
| 5980 | GO_POSITIVE_REGULATION_OF_RESPONSE_TO_DRUG                | -0.97 | 0.29 | 0 | 0 | 0 | not significant |
| 5981 | GO_POSTSYNAPTIC_CYTOSKELETON_ORGANIZATION                 | -0.97 | 0.29 | 0 | 0 | 0 | not significant |
| 5982 | GO_REGULATION_OF_PHOSPHOLIPID_BIOSYNTHETIC_PROCESS        | -0.97 | 0.29 | 0 | 0 | 0 | not significant |
| 5983 | GO_RESPONSE_TO_OXYGEN_GLUCCOSE_DEPRIVATION                | -0.97 | 0.29 | 0 | 0 | 0 | not significant |



|      |                                                            |       |      |   |   |   |                 |
|------|------------------------------------------------------------|-------|------|---|---|---|-----------------|
| 5984 | REACTOME_INTRINSIC_PATHWAY_OF_FIBRIN_CLOT_FORMATION        | -0.97 | 0.29 | 0 | 0 | 0 | not significant |
| 5985 | CHR20P13                                                   | -0.97 | 0.28 | 0 | 0 | 0 | not significant |
| 5986 | GO_COATED_VESICLE                                          | -0.97 | 0.28 | 0 | 0 | 0 | not significant |
| 5987 | GO_POSITIVE_REGULATION_OF_CELLULAR_PROTEIN_CATABOLIC_PRO   | -0.97 | 0.28 | 0 | 0 | 0 | not significant |
| 5988 | GO_PROTEIN_C_TERMINUS_BINDING                              | -0.97 | 0.28 | 0 | 0 | 0 | not significant |
| 5989 | GO_RESPONSE_TO_BMP                                         | -0.97 | 0.28 | 0 | 0 | 0 | not significant |
| 5990 | MIDORIKAWA_AMPLIFIED_IN_LIVER_CANCER                       | -0.97 | 0.28 | 0 | 0 | 0 | not significant |
| 5991 | MIKKELSEN_MCV6_ICP_WITH_H3K27ME3                           | -0.97 | 0.28 | 0 | 0 | 0 | not significant |
| 5992 | EGFR_UP.V1_DN                                              | -0.97 | 0.26 | 0 | 0 | 0 | not significant |
| 5993 | ESC_V6.5_UP_LATE.V1_DN                                     | -0.97 | 0.26 | 0 | 0 | 0 | not significant |
| 5994 | GO_CELLULAR_RESPONSE_TO_INSULIN_STIMULUS                   | -0.97 | 0.26 | 0 | 0 | 0 | not significant |
| 5995 | GO_EPIDERMIS_DEVELOPMENT                                   | -0.97 | 0.26 | 0 | 0 | 0 | not significant |
| 5996 | GO_PROTEIN_N_TERMINUS_BINDING                              | -0.97 | 0.26 | 0 | 0 | 0 | not significant |
| 5997 | REACTOME_MEIOTIC_RECOMBINATION                             | -0.97 | 0.26 | 0 | 0 | 0 | not significant |
| 5998 | BROWNE_HCMV_INFECTION_20HR_UP                              | -0.97 | 0.25 | 0 | 0 | 0 | not significant |
| 5999 | GO_POSITIVE_REGULATION_OF_TRANSFERASE_ACTIVITY             | -0.97 | 0.25 | 0 | 0 | 0 | not significant |
| 6000 | FORTSCHEGGER_PHF8_TARGETS_DN                               | -0.97 | 0.20 | 0 | 0 | 0 | not significant |
| 6001 | GO_CARBOHYDRATE_DERIVATIVE_METABOLIC_PROCESS               | -0.97 | 0.17 | 0 | 0 | 0 | not significant |
| 6002 | GO_REGULATION_OF_AMINO_ACID_TRANSPORT                      | -0.96 | 0.32 | 0 | 0 | 0 | not significant |
| 6003 | TURJANSKI_MAPK14_TARGETS                                   | -0.96 | 0.32 | 0 | 0 | 0 | not significant |
| 6004 | AMIT_EGF_RESPONSE_60_MCF10A                                | -0.96 | 0.31 | 0 | 0 | 0 | not significant |
| 6005 | GO_G_PROTEIN_COUPLED_ACETYLCHOLINE_RECEPTOR_SIGNALING_P/   | -0.96 | 0.31 | 0 | 0 | 0 | not significant |
| 6006 | GO_ISOCITRATE_DEHYDROGENASE_ACTIVITY                       | -0.96 | 0.31 | 0 | 0 | 0 | not significant |
| 6007 | GO_LONG_CHAIN_FATTY_ACID_METABOLIC_PROCESS                 | -0.96 | 0.31 | 0 | 0 | 0 | not significant |
| 6008 | GO_MRNA_CLEAVAGE_INVOLVED_IN_MRNA_PROCESSING               | -0.96 | 0.31 | 0 | 0 | 0 | not significant |
| 6009 | GO_NEGATIVE_REGULATION_OF_TUMOR_NECROSIS_FACTOR_MEDIATE    | -0.96 | 0.31 | 0 | 0 | 0 | not significant |
| 6010 | GO_POSITIVE_REGULATION_OF_PHOSPHATASE_ACTIVITY             | -0.96 | 0.31 | 0 | 0 | 0 | not significant |
| 6011 | GO_PROTEIN_TRIMERIZATION                                   | -0.96 | 0.31 | 0 | 0 | 0 | not significant |
| 6012 | GO_PURINE_NUCLEOSIDE_BIOSYNTHETIC_PROCESS                  | -0.96 | 0.31 | 0 | 0 | 0 | not significant |
| 6013 | GO_RIBOSOMAL_PROTEIN_IMPORT_INTO_NUCLEUS                   | -0.96 | 0.31 | 0 | 0 | 0 | not significant |
| 6014 | REACTOME_MITOCHONDRIAL_FATTY_ACID_BETA_OXIDATION_OF_SATU   | -0.96 | 0.31 | 0 | 0 | 0 | not significant |
| 6015 | GO_CLATHRIN_COATED_ENDOCYTIC_VESICLE_MEMBRANE              | -0.96 | 0.30 | 0 | 0 | 0 | not significant |
| 6016 | GO_ENDORIBONUCLEASE_ACTIVITY                               | -0.96 | 0.30 | 0 | 0 | 0 | not significant |
| 6017 | GO_MYELOID_DENDRITIC_CELL_ACTIVATION                       | -0.96 | 0.30 | 0 | 0 | 0 | not significant |
| 6018 | GO_MYOSIN_FILAMENT                                         | -0.96 | 0.30 | 0 | 0 | 0 | not significant |
| 6019 | GO_NEGATIVE_REGULATION_OF_TOLL_LIKE_RECEPTOR_SIGNALING_P/  | -0.96 | 0.30 | 0 | 0 | 0 | not significant |
| 6020 | GO_NEURAL_CRESCENT_CELL_MIGRATION                          | -0.96 | 0.30 | 0 | 0 | 0 | not significant |
| 6021 | GO_NEURON_CELL_CELL_ADHESION                               | -0.96 | 0.30 | 0 | 0 | 0 | not significant |
| 6022 | GO_PHOSPHOLIPASE_ACTIVATOR_ACTIVITY                        | -0.96 | 0.30 | 0 | 0 | 0 | not significant |
| 6023 | GO_POSITIVE_REGULATION_OF_NUCLEOTIDE_BIOSYNTHETIC_PROCESS  | -0.96 | 0.30 | 0 | 0 | 0 | not significant |
| 6024 | GO_POSITIVE_REGULATION_OF_SISTER_CHROMATID_COHESION        | -0.96 | 0.30 | 0 | 0 | 0 | not significant |
| 6025 | GO_PYRIMIDINE_NUCLEOTIDE_BIOSYNTHETIC_PROCESS              | -0.96 | 0.30 | 0 | 0 | 0 | not significant |
| 6026 | GO_TETRAPYRROLE_BIOSYNTHETIC_PROCESS                       | -0.96 | 0.30 | 0 | 0 | 0 | not significant |
| 6027 | JACKSON_DNMT1_TARGETS_DN                                   | -0.96 | 0.30 | 0 | 0 | 0 | not significant |
| 6028 | SCHRAETS_MLL_TARGETS_DN                                    | -0.96 | 0.30 | 0 | 0 | 0 | not significant |
| 6029 | GARGALOVIC_RESPONSE_TO_OXIDIZED_PHOSPHOLIPIDS_BLUE_DN      | -0.96 | 0.29 | 0 | 0 | 0 | not significant |
| 6030 | GO_CELL_CELL_CONTACT_ZONE                                  | -0.96 | 0.29 | 0 | 0 | 0 | not significant |
| 6031 | GO_CELLULAR_HORMONE_METABOLIC_PROCESS                      | -0.96 | 0.29 | 0 | 0 | 0 | not significant |
| 6032 | GO_NEGATIVE_REGULATION_OF_MICROTUBULE_DEPOLYMERIZATION     | -0.96 | 0.29 | 0 | 0 | 0 | not significant |
| 6033 | GO_POSTSYNAPTIC_ACTIN_CYTOSKELETON_ORGANIZATION            | -0.96 | 0.29 | 0 | 0 | 0 | not significant |
| 6034 | GO_REGULATION_OF_CELLULAR_RESPONSE_TO_INSULIN_STIMULUS     | -0.96 | 0.29 | 0 | 0 | 0 | not significant |
| 6035 | GO_REGULATION_OF_CHEMOKINE_C_X_C_MOTIF_LIGAND_2_PRODUCTI   | -0.96 | 0.29 | 0 | 0 | 0 | not significant |
| 6036 | GO_REGULATION_OF_COLLATERAL_SPROUTING                      | -0.96 | 0.29 | 0 | 0 | 0 | not significant |
| 6037 | GO_REGULATION_OF_GASTRULATION                              | -0.96 | 0.29 | 0 | 0 | 0 | not significant |
| 6038 | GO_RESPONSE_TO_ACETYLCHOLINE                               | -0.96 | 0.29 | 0 | 0 | 0 | not significant |
| 6039 | GO_U6_SNRNA_BINDING                                        | -0.96 | 0.29 | 0 | 0 | 0 | not significant |
| 6040 | KREG_HYPOXIA_VIA_KDM3A                                     | -0.96 | 0.29 | 0 | 0 | 0 | not significant |
| 6041 | REACTOME_BASE_EXCISION_REPAIR                              | -0.96 | 0.29 | 0 | 0 | 0 | not significant |
| 6042 | REACTOME_GASTRIN_CREB_SIGNALING_PATHWAY_VIA_PKC_AND_MAF    | -0.96 | 0.29 | 0 | 0 | 0 | not significant |
| 6043 | REACTOME_SIGNALING_BY_NTRK1_TRKA                           | -0.96 | 0.29 | 0 | 0 | 0 | not significant |
| 6044 | RIZ_ERYTHROID_DIFFERENTIATION                              | -0.96 | 0.29 | 0 | 0 | 0 | not significant |
| 6045 | SCHAVOLT_TARGETS_OF_TP53_AND_TP63                          | -0.96 | 0.29 | 0 | 0 | 0 | not significant |
| 6046 | VANASSE_BCL2_TARGETS_UP                                    | -0.96 | 0.29 | 0 | 0 | 0 | not significant |
| 6047 | WENG_POR_DOSAGE                                            | -0.96 | 0.29 | 0 | 0 | 0 | not significant |
| 6048 | GO_EPHRIN_RECEPTOR_ACTIVITY                                | -0.96 | 0.28 | 0 | 0 | 0 | not significant |
| 6049 | GO_EXTRINSIC_APOPTOTIC_SIGNALING_PATHWAY                   | -0.96 | 0.28 | 0 | 0 | 0 | not significant |
| 6050 | GO_POLYSACCHARIDE_BINDING                                  | -0.96 | 0.28 | 0 | 0 | 0 | not significant |
| 6051 | GO_POST_EMBRYONIC_CAMERA_TYPE_EYE_DEVELOPMENT              | -0.96 | 0.28 | 0 | 0 | 0 | not significant |
| 6052 | GO_PURINE_NUCLEOSIDE_DIPHOSPHATE_METABOLIC_PROCESS         | -0.96 | 0.28 | 0 | 0 | 0 | not significant |
| 6053 | GO_REGULATION_OF_OOGENESIS                                 | -0.96 | 0.28 | 0 | 0 | 0 | not significant |
| 6054 | GO_RETINA_MORPHOGENESIS_IN_CAMERA_TYPE_EYE                 | -0.96 | 0.28 | 0 | 0 | 0 | not significant |
| 6055 | GO_SNRNA_LOCALIZATION                                      | -0.96 | 0.28 | 0 | 0 | 0 | not significant |
| 6056 | GO_SPERM_CHROMATIN_CONDENSATION                            | -0.96 | 0.28 | 0 | 0 | 0 | not significant |
| 6057 | GO_STEROL_TRANSPORT                                        | -0.96 | 0.28 | 0 | 0 | 0 | not significant |
| 6058 | HOOI_ST7_TARGETS_UP                                        | -0.96 | 0.28 | 0 | 0 | 0 | not significant |
| 6059 | MAYBURD_RESPONSE_TO_L663536_UP                             | -0.96 | 0.28 | 0 | 0 | 0 | not significant |
| 6060 | MORI_PLASMA_CELL_UP                                        | -0.96 | 0.28 | 0 | 0 | 0 | not significant |
| 6061 | NAM_FXYD5_TARGETS_DN                                       | -0.96 | 0.28 | 0 | 0 | 0 | not significant |
| 6062 | REACTOME_EGFR_TRANSACTIVATION_BY_GASTRIN                   | -0.96 | 0.28 | 0 | 0 | 0 | not significant |
| 6063 | REACTOME_REPRESSION_OF_WNT_TARGET_GENES                    | -0.96 | 0.28 | 0 | 0 | 0 | not significant |
| 6064 | SIG_INSULIN_RECEPTOR_PATHWAY_IN_CARDIAC_MYOCYTES           | -0.96 | 0.28 | 0 | 0 | 0 | not significant |
| 6065 | ZAMORA_NOS2_TARGETS_UP                                     | -0.96 | 0.28 | 0 | 0 | 0 | not significant |
| 6066 | BOYLAN_MULTIPLE_MYELOMA_PCA3_DN                            | -0.96 | 0.27 | 0 | 0 | 0 | not significant |
| 6067 | GO_LIMBIC_SYSTEM_DEVELOPMENT                               | -0.96 | 0.27 | 0 | 0 | 0 | not significant |
| 6068 | GO_NURD_COMPLEX                                            | -0.96 | 0.27 | 0 | 0 | 0 | not significant |
| 6069 | GO_REGULATION_OF_PROTEASOMAL_UBIQUITIN_DEPENDENT_PROTEIN   | -0.96 | 0.27 | 0 | 0 | 0 | not significant |
| 6070 | GO_REGULATION_OF_STRESS_ACTIVATED_PROTEIN_KINASE_SIGNALING | -0.96 | 0.27 | 0 | 0 | 0 | not significant |
| 6071 | GO_RRNA_3_END_PROCESSING                                   | -0.96 | 0.27 | 0 | 0 | 0 | not significant |
| 6072 | HOLLERN_EMT_BREAST_TUMOR_UP                                | -0.96 | 0.27 | 0 | 0 | 0 | not significant |
| 6073 | MCCLUNG_COCAINE_REWARD_5D                                  | -0.96 | 0.27 | 0 | 0 | 0 | not significant |
| 6074 | MELLMAN_TUT1_TARGETS_DN                                    | -0.96 | 0.27 | 0 | 0 | 0 | not significant |
| 6075 | NAKAYAMA_SOFT_TISSUE_TUMORS_PCA1_DN                        | -0.96 | 0.27 | 0 | 0 | 0 | not significant |
| 6076 | PID_LKB1_PATHWAY                                           | -0.96 | 0.27 | 0 | 0 | 0 | not significant |
| 6077 | VETTER_TARGETS_OF_PRKCA_AND_ETS1_UP                        | -0.96 | 0.27 | 0 | 0 | 0 | not significant |
| 6078 | BROWNE_HCMV_INFECTION_10HR_DN                              | -0.96 | 0.26 | 0 | 0 | 0 | not significant |
| 6079 | CASTELLANO_NRAS_TARGETS_UP                                 | -0.96 | 0.26 | 0 | 0 | 0 | not significant |
| 6080 | GO_BIOMINERAL_TISSUE_DEVELOPMENT                           | -0.96 | 0.26 | 0 | 0 | 0 | not significant |
| 6081 | GO_PROTEIN_TAG                                             | -0.96 | 0.26 | 0 | 0 | 0 | not significant |
| 6082 | HALLMARK_SPERMATOGENESIS                                   | -0.96 | 0.26 | 0 | 0 | 0 | not significant |
| 6083 | RAF_UP.V1_UP                                               | -0.96 | 0.26 | 0 | 0 | 0 | not significant |
| 6084 | GO_NUCLEAR_PERIPHERY                                       | -0.96 | 0.25 | 0 | 0 | 0 | not significant |
| 6085 | KATSANOU_ELAVL1_TARGETS_DN                                 | -0.96 | 0.25 | 0 | 0 | 0 | not significant |
| 6086 | SANSOM_WNT_PATHWAY_REQUIRE_MYC                             | -0.96 | 0.25 | 0 | 0 | 0 | not significant |
| 6087 | REACTOME_CILIUM_ASSEMBLY                                   | -0.96 | 0.24 | 0 | 0 | 0 | not significant |
| 6088 | GO_NEGATIVE_REGULATION_OF_NERVOUS_SYSTEM_DEVELOPMENT       | -0.96 | 0.22 | 0 | 0 | 0 | not significant |
| 6089 | GO_POSITIVE_REGULATION_OF_NERVOUS_SYSTEM_DEVELOPMENT       | -0.96 | 0.22 | 0 | 0 | 0 | not significant |
| 6090 | GO_PROTEIN_DOMAIN_SPECIFIC_BINDING                         | -0.96 | 0.22 | 0 | 0 | 0 | not significant |
| 6091 | PILON_KLF1_TARGETS_UP                                      | -0.96 | 0.22 | 0 | 0 | 0 | not significant |
| 6092 | GO_CATION_TRANSMEMBRANE_TRANSPORTER_ACTIVITY               | -0.96 | 0.21 | 0 | 0 | 0 | not significant |

|      |                                                              |       |      |   |   |   |                 |
|------|--------------------------------------------------------------|-------|------|---|---|---|-----------------|
| 6093 | GO_ORGANELLE_FISSION                                         | -0.96 | 0.21 | 0 | 0 | 0 | not significant |
| 6094 | GO_MICROTUBULE_CYTOSKELETON_ORGANIZATION                     | -0.96 | 0.20 | 0 | 0 | 0 | not significant |
| 6095 | YAGI_AML_WITH_INV_16_TRANSLOCATION                           | -0.96 | 0.20 | 0 | 0 | 0 | not significant |
| 6096 | HAN_SATB1_TARGETS_UP                                         | -0.96 | 0.19 | 0 | 0 | 0 | not significant |
| 6097 | DACOSTA_UV_RESPONSE_VIA_ERCC3_COMMON_DN                      | -0.96 | 0.17 | 0 | 0 | 0 | not significant |
| 6098 | GO_REGULATION_OF_KINASE_ACTIVITY                             | -0.96 | 0.12 | 0 | 0 | 0 | not significant |
| 6099 | GO_POSITIVE_REGULATION_OF_NITRIC_OXIDE_BIOSYNTHETIC_PROCES   | -0.95 | 0.31 | 0 | 0 | 0 | not significant |
| 6100 | GO_FATTY_ACID_DERIVATIVE_METABOLIC_PROCESS                   | -0.95 | 0.30 | 0 | 0 | 0 | not significant |
| 6101 | GO_NEGATIVE_REGULATION_OF_CYTOKINE_SECRETION                 | -0.95 | 0.30 | 0 | 0 | 0 | not significant |
| 6102 | GO_NUCLEOSIDE_TRIPHOSPHATE_DIPHOSPHATASE_ACTIVITY            | -0.95 | 0.30 | 0 | 0 | 0 | not significant |
| 6103 | GO_PROTEIN_LOCALIZATION_TO_PRESYNAPSE                        | -0.95 | 0.30 | 0 | 0 | 0 | not significant |
| 6104 | GO_SYNAPTIC_TRANSMISSION_CHOLINERGIC                         | -0.95 | 0.30 | 0 | 0 | 0 | not significant |
| 6105 | MCGARVEY_SILENCED_BY_METHYLATION_IN_COLON_CANCER             | -0.95 | 0.30 | 0 | 0 | 0 | not significant |
| 6106 | NAGY_PCAF_COMPONENTS_HUMAN                                   | -0.95 | 0.30 | 0 | 0 | 0 | not significant |
| 6107 | BILBAN_B_CELL_LPL_DN                                         | -0.95 | 0.29 | 0 | 0 | 0 | not significant |
| 6108 | CHR1P12                                                      | -0.95 | 0.29 | 0 | 0 | 0 | not significant |
| 6109 | GO_ACTIVATION_OF_CYSSTEINE_TYPE_ENDOPEPTIDASE_ACTIVITY_INVO  | -0.95 | 0.29 | 0 | 0 | 0 | not significant |
| 6110 | GO_LIPOPOLYSACCHARIDE_BINDING                                | -0.95 | 0.29 | 0 | 0 | 0 | not significant |
| 6111 | GO_REGULATION_OF_EPIDERMIS_DEVELOPMENT                       | -0.95 | 0.29 | 0 | 0 | 0 | not significant |
| 6112 | GO_SURFACTANT_HOMEOSTASIS                                    | -0.95 | 0.29 | 0 | 0 | 0 | not significant |
| 6113 | GO_UBIQUITINATION LIKE MODIFICATION DEPENDENT PROTEIN BINDIN | -0.95 | 0.29 | 0 | 0 | 0 | not significant |
| 6114 | GO_V_D_J_RECOMBINATION                                       | -0.95 | 0.29 | 0 | 0 | 0 | not significant |
| 6115 | KEGG_HISTIDINE_METABOLISM                                    | -0.95 | 0.29 | 0 | 0 | 0 | not significant |
| 6116 | KYNG_ENVIRONMENTAL_STRESS_RESPONSE_NOT_BY_GAMMA_IN_WS        | -0.95 | 0.29 | 0 | 0 | 0 | not significant |
| 6117 | WEINMANN_ADAPTATION_TO_HYPOXIA_UP                            | -0.95 | 0.29 | 0 | 0 | 0 | not significant |
| 6118 | AMIT_EGF_RESPONSE_40_HELA                                    | -0.95 | 0.28 | 0 | 0 | 0 | not significant |
| 6119 | GO_9PLUS0_NON_MOTILE_CILIUM                                  | -0.95 | 0.28 | 0 | 0 | 0 | not significant |
| 6120 | GO_CHLORIDE_CHANNEL_REGULATOR_ACTIVITY                       | -0.95 | 0.28 | 0 | 0 | 0 | not significant |
| 6121 | GO_EKC_KEOPS_COMPLEX                                         | -0.95 | 0.28 | 0 | 0 | 0 | not significant |
| 6122 | GO_REGULATION_OF_MRNA_BINDING                                | -0.95 | 0.28 | 0 | 0 | 0 | not significant |
| 6123 | GO_TORC2_COMPLEX                                             | -0.95 | 0.28 | 0 | 0 | 0 | not significant |
| 6124 | GO_TRANSLESION_SYNTHESIS                                     | -0.95 | 0.28 | 0 | 0 | 0 | not significant |
| 6125 | HUPER_BREAST_BASAL_VS_LUMINAL_DN                             | -0.95 | 0.28 | 0 | 0 | 0 | not significant |
| 6126 | KONDO_PROSTATE_CANCER_HCP_WITH_H3K27ME3                      | -0.95 | 0.28 | 0 | 0 | 0 | not significant |
| 6127 | KRASNOSELSKAYA_ILF3_TARGETS_UP                               | -0.95 | 0.28 | 0 | 0 | 0 | not significant |
| 6128 | BIOCARTA_AHSP_PATHWAY                                        | -0.95 | 0.27 | 0 | 0 | 0 | not significant |
| 6129 | GO_MYOSIN_FILAMENT_ORGANIZATION                              | -0.95 | 0.27 | 0 | 0 | 0 | not significant |
| 6130 | GO_REGULATION_OF_GLIAL_CELL_MIGRATION                        | -0.95 | 0.27 | 0 | 0 | 0 | not significant |
| 6131 | GO_SOLUTE_PROTON_SYMPORTER_ACTIVITY                          | -0.95 | 0.27 | 0 | 0 | 0 | not significant |
| 6132 | KEGG_RIG_I LIKE RECEPTOR SIGNALING PATHWAY                   | -0.95 | 0.27 | 0 | 0 | 0 | not significant |
| 6133 | MODY_HIPPOCAMPUS_PRENATAL                                    | -0.95 | 0.27 | 0 | 0 | 0 | not significant |
| 6134 | REACTOME_GAB1_SIGNALOSOME                                    | -0.95 | 0.27 | 0 | 0 | 0 | not significant |
| 6135 | REACTOME_MET_ACTIVATES_RAS_SIGNALING                         | -0.95 | 0.27 | 0 | 0 | 0 | not significant |
| 6136 | ROZANOV_MMP14_CORRELATED                                     | -0.95 | 0.27 | 0 | 0 | 0 | not significant |
| 6137 | TSAI_RESPONSE_TO_RADIATION_THERAPY                           | -0.95 | 0.27 | 0 | 0 | 0 | not significant |
| 6138 | WIERENGA_STAT5A_TARGETS_GROUP2                               | -0.95 | 0.27 | 0 | 0 | 0 | not significant |
| 6139 | GO_DNA_MODIFICATION                                          | -0.95 | 0.26 | 0 | 0 | 0 | not significant |
| 6140 | GO_N_TERMINAL_PROTEIN_AMINO_ACID_MODIFICATION                | -0.95 | 0.26 | 0 | 0 | 0 | not significant |
| 6141 | GO_POSITIVE_REGULATION_OF_LYMPHOCYTE_MIGRATION               | -0.95 | 0.26 | 0 | 0 | 0 | not significant |
| 6142 | GO_REGULATION_OF_SPINDLE_ASSEMBLY                            | -0.95 | 0.26 | 0 | 0 | 0 | not significant |
| 6143 | GO_VENTRICULAR_SEPTUM_DEVELOPMENT                            | -0.95 | 0.26 | 0 | 0 | 0 | not significant |
| 6144 | NING_CHRONIC_OBSTRUCTIVE_PULMONARY_DISEASE_DN                | -0.95 | 0.26 | 0 | 0 | 0 | not significant |
| 6145 | XU_GH1_EXOGENOUS_TARGETS_DN                                  | -0.95 | 0.26 | 0 | 0 | 0 | not significant |
| 6146 | ALUNG_GASTRIC_CANCER                                         | -0.95 | 0.25 | 0 | 0 | 0 | not significant |
| 6147 | GO_POSITIVE_REGULATION_OF_BLOOD_VESSEL_ENDOTHELIAL_CELL_I    | -0.95 | 0.25 | 0 | 0 | 0 | not significant |
| 6148 | GO_REGULATION_OF_TRANSMEMBRANE_RECEPTOR_PROTEIN_SERINE       | -0.95 | 0.25 | 0 | 0 | 0 | not significant |
| 6149 | GO_TERTIARY GRANULE                                          | -0.95 | 0.25 | 0 | 0 | 0 | not significant |
| 6150 | INGA_TP53_TARGETS                                            | -0.95 | 0.25 | 0 | 0 | 0 | not significant |
| 6151 | KRAS.KIDNEY_UP.V1_UP                                         | -0.95 | 0.25 | 0 | 0 | 0 | not significant |
| 6152 | PUJANA_XPRSS_INT_NETWORK                                     | -0.95 | 0.25 | 0 | 0 | 0 | not significant |
| 6153 | REACTOME_DISEASES_ASSOCIATED_WITH_GLYCOSAMINOGLYCAN_MET      | -0.95 | 0.25 | 0 | 0 | 0 | not significant |
| 6154 | GO_FAT_CELL_DIFFERENTIATION                                  | -0.95 | 0.24 | 0 | 0 | 0 | not significant |
| 6155 | GO_L GLUTAMINE_TRANSMEMBRANE_TRANSPORTER_ACTIVITY            | -0.95 | 0.24 | 0 | 0 | 0 | not significant |
| 6156 | GO_REGULATION_OF_REGULATED_SECRETORY_PATHWAY                 | -0.95 | 0.24 | 0 | 0 | 0 | not significant |
| 6157 | GO_CLATHRIN_COATED_VESICLE                                   | -0.95 | 0.23 | 0 | 0 | 0 | not significant |
| 6158 | GO_INSULIN_RECEPTOR_SIGNALING_PATHWAY                        | -0.95 | 0.23 | 0 | 0 | 0 | not significant |
| 6159 | GO_GOLGI_ASSOCIATED_VESICLE_MEMBRANE                         | -0.95 | 0.22 | 0 | 0 | 0 | not significant |
| 6160 | ACEVEDO_METHYLATED_IN_LIVER_CANCER_DN                        | -0.95 | 0.17 | 0 | 0 | 0 | not significant |
| 6161 | GO_GTPASE_REGULATOR_ACTIVITY                                 | -0.95 | 0.16 | 0 | 0 | 0 | not significant |
| 6162 | GO_CELLULAR_COMPONENT_MORPHOGENESIS                          | -0.95 | 0.14 | 0 | 0 | 0 | not significant |
| 6163 | GO_ENDOPLASMIC_RETICULUM_PART                                | -0.95 | 0.10 | 0 | 0 | 0 | not significant |
| 6164 | GO_MACROMOLECULE_CATABOLIC_PROCESS                           | -0.95 | 0.10 | 0 | 0 | 0 | not significant |
| 6165 | GO_NEURON_PART                                               | -0.95 | 0.09 | 0 | 0 | 0 | not significant |
| 6166 | GO_NEURAL_RETINA_DEVELOPMENT                                 | -0.94 | 0.30 | 0 | 0 | 0 | not significant |
| 6167 | ABDULRAHMAN_KIDNEY_CANCER_VHL_DN                             | -0.94 | 0.29 | 0 | 0 | 0 | not significant |
| 6168 | FERRARI_RESPONSE_TO_FENRETINIDE_UP                           | -0.94 | 0.29 | 0 | 0 | 0 | not significant |
| 6169 | GO_MODIFICATION_OF_POSTSYNAPTIC_STRUCTURE                    | -0.94 | 0.29 | 0 | 0 | 0 | not significant |
| 6170 | GO_NEGATIVE_REGULATION_OF_POSTTRANSCRIPTIONAL_GENE_SILEN     | -0.94 | 0.29 | 0 | 0 | 0 | not significant |
| 6171 | GO_T_CELL_HOMEOSTASIS                                        | -0.94 | 0.29 | 0 | 0 | 0 | not significant |
| 6172 | TSUNODA_CISPLATIN_RESISTANCE_UP                              | -0.94 | 0.29 | 0 | 0 | 0 | not significant |
| 6173 | ZEMBUSU_SENSITIVITY_TO_NIMUSTINE                             | -0.94 | 0.29 | 0 | 0 | 0 | not significant |
| 6174 | GENTILE_UV_RESPONSE_CLUSTER_D9                               | -0.94 | 0.28 | 0 | 0 | 0 | not significant |
| 6175 | GO_CLASS_I_DNA_PURINIC_OR_PYRIMIDINIC_SITE_ENDONUCLEASE_A    | -0.94 | 0.28 | 0 | 0 | 0 | not significant |
| 6176 | GO_REGULATION_OF_HISTONE_DEACETYLATION                       | -0.94 | 0.28 | 0 | 0 | 0 | not significant |
| 6177 | GO_SMAP_PROTEIN_SIGNAL_TRANSDUCTION                          | -0.94 | 0.28 | 0 | 0 | 0 | not significant |
| 6178 | HOFMANN_CELL_LYMPHOMA_UP                                     | -0.94 | 0.28 | 0 | 0 | 0 | not significant |
| 6179 | REACTOME_CROSSLINKING_OF_COLLAGEN_FIBRILS                    | -0.94 | 0.28 | 0 | 0 | 0 | not significant |
| 6180 | REACTOME_SYNTHESIS_OF_WYBUTOSINE_AT_G37_OF_TRNA_PHE          | -0.94 | 0.28 | 0 | 0 | 0 | not significant |
| 6181 | ZEMBUSU_SENSITIVITY_TO_VINCRISTINE                           | -0.94 | 0.28 | 0 | 0 | 0 | not significant |
| 6182 | BIOCARTA_LIS1_PATHWAY                                        | -0.94 | 0.27 | 0 | 0 | 0 | not significant |
| 6183 | GERHOLD_ADIPOGENESIS_DN                                      | -0.94 | 0.27 | 0 | 0 | 0 | not significant |
| 6184 | GO_AMYLOID_BETA_CLEARANCE_BY_TRANSCYTOSIS                    | -0.94 | 0.27 | 0 | 0 | 0 | not significant |
| 6185 | GO_CALCINEURIN_MEDIATED_SIGNALING                            | -0.94 | 0.27 | 0 | 0 | 0 | not significant |
| 6186 | GO_CELL_MOTILITY_INVOLVED_IN_CEREBRAL_CORTEX_RADIAL_GLIA_C   | -0.94 | 0.27 | 0 | 0 | 0 | not significant |
| 6187 | GO_LATERAL_PLASMA_MEMBRANE                                   | -0.94 | 0.27 | 0 | 0 | 0 | not significant |
| 6188 | GO_NEGATIVE_REGULATION_OF_TELOMERE_MAINTENANCE               | -0.94 | 0.27 | 0 | 0 | 0 | not significant |
| 6189 | GO_NUCLEOTIDE_ACTIVATED_PROTEIN_KINASE_COMPLEX               | -0.94 | 0.27 | 0 | 0 | 0 | not significant |
| 6190 | GO_PHOSPHATIDYLINOSITOL_BISPHOSPHATE_PHOSPHATASE_ACTIVITY    | -0.94 | 0.27 | 0 | 0 | 0 | not significant |
| 6191 | GO_POSITIVE_REGULATION_OF_KIDNEY_DEVELOPMENT                 | -0.94 | 0.27 | 0 | 0 | 0 | not significant |
| 6192 | GO_REGULATION_OF_FEEDING_BEHAVIOR                            | -0.94 | 0.27 | 0 | 0 | 0 | not significant |
| 6193 | GO_REGULATION_OF_NECROTIC_CELL_DEATH                         | -0.94 | 0.27 | 0 | 0 | 0 | not significant |
| 6194 | GO_REGULATION_OF_TRANSMISSION_OF_NERVE_IMPULSE               | -0.94 | 0.27 | 0 | 0 | 0 | not significant |
| 6195 | KEGG_ALANINE_ASPARTATE_AND_Glutamate_Metabolism              | -0.94 | 0.27 | 0 | 0 | 0 | not significant |
| 6196 | ROZANOV_MMP14_TARGETS_DN                                     | -0.94 | 0.27 | 0 | 0 | 0 | not significant |
| 6197 | ZHU_SKIL_TARGETS_DN                                          | -0.94 | 0.27 | 0 | 0 | 0 | not significant |
| 6198 | ABRAHAM_ALPC_VS_MULTIPLE_MYELOMA_DN                          | -0.94 | 0.26 | 0 | 0 | 0 | not significant |
| 6199 | BROWNE_HCMV_INFECTION_30MIN_DN                               | -0.94 | 0.26 | 0 | 0 | 0 | not significant |
| 6200 | DAWSON_METHYLATED_IN_LYMPHOMA_TCL1                           | -0.94 | 0.26 | 0 | 0 | 0 | not significant |
| 6201 | FINETTI_BREAST_CANCERS_KINOME_BLUE                           | -0.94 | 0.26 | 0 | 0 | 0 | not significant |

|      |                                                            |       |      |   |   |   |                 |
|------|------------------------------------------------------------|-------|------|---|---|---|-----------------|
| 6202 | GO_MYD88_DEPENDENT_TOLL_LIKE_RECEPTOR_SIGNALING_PATHWAY    | -0.94 | 0.26 | 0 | 0 | 0 | not significant |
| 6203 | GO_NEGATIVE_REGULATION_OF_INTRACELLULAR_STEROID_HORMONE    | -0.94 | 0.26 | 0 | 0 | 0 | not significant |
| 6204 | GO_NUCLEOBASE_CONTAINING_COMPOUND_KINASE_ACTIVITY          | -0.94 | 0.26 | 0 | 0 | 0 | not significant |
| 6205 | GO_REGULATION_OF_BONE_DEVELOPMENT                          | -0.94 | 0.26 | 0 | 0 | 0 | not significant |
| 6206 | GO_REGULATION_OF_CELL_COMMUNICATION_BY_ELECTRICAL_COUPLI   | -0.94 | 0.26 | 0 | 0 | 0 | not significant |
| 6207 | GO_REGULATION_OF_LYMPHOCYTE_MIGRATION                      | -0.94 | 0.26 | 0 | 0 | 0 | not significant |
| 6208 | KANG_FLUOROURACIL_RESISTANCE_UP                            | -0.94 | 0.26 | 0 | 0 | 0 | not significant |
| 6209 | KIM_LIVER_CANCER_POOR_SURVIVAL_UP                          | -0.94 | 0.26 | 0 | 0 | 0 | not significant |
| 6210 | LIU_VAV3_PROSTATE_CARCINOGENESIS_UP                        | -0.94 | 0.26 | 0 | 0 | 0 | not significant |
| 6211 | MARSON_FOXP3_TARGETS_STIMULATED_UP                         | -0.94 | 0.26 | 0 | 0 | 0 | not significant |
| 6212 | REACTOME_VOLTAGE_GATED_POTASSIUM_CHANNELS                  | -0.94 | 0.26 | 0 | 0 | 0 | not significant |
| 6213 | CHR1P11                                                    | -0.94 | 0.25 | 0 | 0 | 0 | not significant |
| 6214 | CHR1P13                                                    | -0.94 | 0.25 | 0 | 0 | 0 | not significant |
| 6215 | GO_NEGATIVE_REGULATION_OF_SYNAPSE_ORGANIZATION             | -0.94 | 0.25 | 0 | 0 | 0 | not significant |
| 6216 | GO_POSITIVE_REGULATION_OF_CELL_CYCLE_G1_S_PHASE_TRANSITIO  | -0.94 | 0.25 | 0 | 0 | 0 | not significant |
| 6217 | GO_PROTEIN_LIPID_COMPLEX_SUBUNIT_ORGANIZATION              | -0.94 | 0.25 | 0 | 0 | 0 | not significant |
| 6218 | GO_REGULATION_OF_ADHERENS_JUNCTION_ORGANIZATION            | -0.94 | 0.25 | 0 | 0 | 0 | not significant |
| 6219 | PID_TAP63_PATHWAY                                          | -0.94 | 0.25 | 0 | 0 | 0 | not significant |
| 6220 | PWJANA_BREAST_CANCER_LIT_INT_NETWORK                       | -0.94 | 0.25 | 0 | 0 | 0 | not significant |
| 6221 | REACTOME_PLASMA_LIPOPROTEIN_CLEARANCE                      | -0.94 | 0.25 | 0 | 0 | 0 | not significant |
| 6222 | GO_HEART_VALVE_DEVELOPMENT                                 | -0.94 | 0.24 | 0 | 0 | 0 | not significant |
| 6223 | GO_MITOTIC_SPINDLE                                         | -0.94 | 0.24 | 0 | 0 | 0 | not significant |
| 6224 | GO_POSITIVE_REGULATION_OF_PROTEOLYSIS_INVOLVED_IN_CELLULAF | -0.94 | 0.24 | 0 | 0 | 0 | not significant |
| 6225 | REACTOME_METABOLISM_OF_WATER_SOLUBLE_VITAMINS_AND_COFAC    | -0.94 | 0.24 | 0 | 0 | 0 | not significant |
| 6226 | SIRNA_EIF4GI_UP                                            | -0.94 | 0.24 | 0 | 0 | 0 | not significant |
| 6227 | BYSTRYKH_HEMATOPOIESIS_STEM_CELL_QTL_CIS                   | -0.94 | 0.23 | 0 | 0 | 0 | not significant |
| 6228 | DITTMER_PTHLH_TARGETS_DN                                   | -0.94 | 0.23 | 0 | 0 | 0 | not significant |
| 6229 | GO_NEGATIVE_REGULATION_OF_DNA_BINDING_TRANSCRIPTION_FACTC  | -0.94 | 0.23 | 0 | 0 | 0 | not significant |
| 6230 | GO_NUCLEOSIDE_METABOLIC_PROCESS                            | -0.94 | 0.23 | 0 | 0 | 0 | not significant |
| 6231 | HOSHIDA_LIVER_CANCER_SURVIVAL_DN                           | -0.94 | 0.23 | 0 | 0 | 0 | not significant |
| 6232 | GO_GLUCOSE_METABOLIC_PROCESS                               | -0.94 | 0.22 | 0 | 0 | 0 | not significant |
| 6233 | GO_POSITIVE_REGULATION_OF_IKK_CASCADE                      | -0.94 | 0.22 | 0 | 0 | 0 | not significant |
| 6234 | GO_REGULATION_OF_MRNA_SPLICING_VIA_SPLICEOSOME             | -0.94 | 0.22 | 0 | 0 | 0 | not significant |
| 6235 | GO_REGULATION_OF_NEUROTRANSMITTER_LEVELS                   | -0.94 | 0.22 | 0 | 0 | 0 | not significant |
| 6236 | GO_SPECIFIC_GNANULE                                        | -0.94 | 0.22 | 0 | 0 | 0 | not significant |
| 6237 | NIKOLSKY_BREAST_CANCER_8Q12_Q22_AMPLICON                   | -0.94 | 0.22 | 0 | 0 | 0 | not significant |
| 6238 | RAY_TUMORIGENESIS_BY_ERBB2_CDC25A_UP                       | -0.94 | 0.22 | 0 | 0 | 0 | not significant |
| 6239 | REACTOME_RHO_GTPASE_CYCLE                                  | -0.94 | 0.22 | 0 | 0 | 0 | not significant |
| 6240 | SMIRNOV_RESPONSE_TO_IR_6HR_UP                              | -0.94 | 0.22 | 0 | 0 | 0 | not significant |
| 6241 | GO_CELL_PROJECTION_MEMBRANE                                | -0.94 | 0.21 | 0 | 0 | 0 | not significant |
| 6242 | GO_MULTICELLULAR_ORGANISM_GROWTH                           | -0.94 | 0.21 | 0 | 0 | 0 | not significant |
| 6243 | GO_NEGATIVE_REGULATION_OF_CELL_PROJECTION_ORGANIZATION     | -0.94 | 0.21 | 0 | 0 | 0 | not significant |
| 6244 | GO_POSITIVE_REGULATION_OF_MITOTIC_CELL_CYCLE               | -0.94 | 0.21 | 0 | 0 | 0 | not significant |
| 6245 | PID_TELOMERASE_PATHWAY                                     | -0.94 | 0.21 | 0 | 0 | 0 | not significant |
| 6246 | GO_TRANSPORT_VESICLE                                       | -0.94 | 0.20 | 0 | 0 | 0 | not significant |
| 6247 | GCNP_SHH_UP_EARLY.V1_UP                                    | -0.94 | 0.19 | 0 | 0 | 0 | not significant |
| 6248 | GO_STEROID_HORMONE_MEDIATED_SIGNALING_PATHWAY              | -0.94 | 0.19 | 0 | 0 | 0 | not significant |
| 6249 | GO_CELLULAR_RESPONSE_TO_PEPTIDE                            | -0.94 | 0.18 | 0 | 0 | 0 | not significant |
| 6250 | GO_MAGNESIUM_ION_BINDING                                   | -0.94 | 0.18 | 0 | 0 | 0 | not significant |
| 6251 | GO_POSITIVE_REGULATION_OF_KINASE_ACTIVITY                  | -0.94 | 0.17 | 0 | 0 | 0 | not significant |
| 6252 | LU_EZH2_TARGETS_DN                                         | -0.94 | 0.16 | 0 | 0 | 0 | not significant |
| 6253 | OSMAN_BLADDER_CANCER_UP                                    | -0.94 | 0.15 | 0 | 0 | 0 | not significant |
| 6254 | GO_CHROMOSOME_ORGANIZATION                                 | -0.94 | 0.07 | 0 | 0 | 0 | not significant |
| 6255 | GO_CALCIIUM_DEPENDENT_PROTEIN_SERINE_THREONINE_PHOSPHATAS  | -0.93 | 0.29 | 0 | 0 | 0 | not significant |
| 6256 | GO_NEGATIVE_REGULATION_OF_MYELOID_LEUKOCYTE_MEDIATED_IMM   | -0.93 | 0.28 | 0 | 0 | 0 | not significant |
| 6257 | GO_POLY_PURINE_TRACT_BINDING                               | -0.93 | 0.28 | 0 | 0 | 0 | not significant |
| 6258 | LEE_NAIVE_T_LYMPHOCYTE                                     | -0.93 | 0.28 | 0 | 0 | 0 | not significant |
| 6259 | NUNODA_RESPONSE_TO_DASATINIB_IMATINIB_DN                   | -0.93 | 0.28 | 0 | 0 | 0 | not significant |
| 6260 | BIOCARTA_THelper_PATHWAY                                   | -0.93 | 0.27 | 0 | 0 | 0 | not significant |
| 6261 | CHR10Q11                                                   | -0.93 | 0.27 | 0 | 0 | 0 | not significant |
| 6262 | GO_DNA_METHYLTRANSFERASE_ACTIVITY                          | -0.93 | 0.27 | 0 | 0 | 0 | not significant |
| 6263 | GO_LABYRINTHINE_LAYER_BLOOD_VESSEL_DEVELOPMENT             | -0.93 | 0.27 | 0 | 0 | 0 | not significant |
| 6264 | GO_NEGATIVE_REGULATION_OF_OXIDATIVE_STRESS_INDUCED_INTRINS | -0.93 | 0.27 | 0 | 0 | 0 | not significant |
| 6265 | GO_STRIATUM_DEVELOPMENT                                    | -0.93 | 0.27 | 0 | 0 | 0 | not significant |
| 6266 | GO_TRANSLATIONAL_READTHROUGH                               | -0.93 | 0.27 | 0 | 0 | 0 | not significant |
| 6267 | NIELSEN_LEIOMYOSARCOMA_CNN1_DN                             | -0.93 | 0.27 | 0 | 0 | 0 | not significant |
| 6268 | NIKOLSKY_BREAST_CANCER_1Q21_AMPLICON                       | -0.93 | 0.27 | 0 | 0 | 0 | not significant |
| 6269 | PYEON_CANCER_HEAD_AND_NECK_VS_CERVICAL_DN                  | -0.93 | 0.27 | 0 | 0 | 0 | not significant |
| 6270 | REACTOME_CASPASE_ACTIVATION_VIA_DEATH_RECEPTORS_IN_THE_PI  | -0.93 | 0.27 | 0 | 0 | 0 | not significant |
| 6271 | BIOCARTA_P53HYPOXIA_PATHWAY                                | -0.93 | 0.26 | 0 | 0 | 0 | not significant |
| 6272 | FIRESTEIN_CTNNB1_PATHWAY_AND_PROLIFERATION                 | -0.93 | 0.26 | 0 | 0 | 0 | not significant |
| 6273 | GO_ARTERY_DEVELOPMENT                                      | -0.93 | 0.26 | 0 | 0 | 0 | not significant |
| 6274 | GO_CAMP_DEPENDENT_PROTEIN_KINASE_REGULATOR_ACTIVITY        | -0.93 | 0.26 | 0 | 0 | 0 | not significant |
| 6275 | GO_EPITHELIAL_CELL_PROLIFERATION_INVOLVED_IN_PROSTATE_GLAN | -0.93 | 0.26 | 0 | 0 | 0 | not significant |
| 6276 | GO_ESTABLISHMENT_OR_MAINTENANCE_OF_BIPOLAR_CELL_POLARITY   | -0.93 | 0.26 | 0 | 0 | 0 | not significant |
| 6277 | GO_FOLIC_ACID_CONTAINING_COMPOUND_BIOSYNTHETIC_PROCESS     | -0.93 | 0.26 | 0 | 0 | 0 | not significant |
| 6278 | GO_FUCOSYLATION                                            | -0.93 | 0.26 | 0 | 0 | 0 | not significant |
| 6279 | GO_MICROTUBULE_ORGANIZING_CENTER_LOCALIZATION              | -0.93 | 0.26 | 0 | 0 | 0 | not significant |
| 6280 | GO_NEGATIVE_REGULATION_OF_KERATINOCYTE_PROLIFERATION       | -0.93 | 0.26 | 0 | 0 | 0 | not significant |
| 6281 | GO_NEGATIVE_REGULATION_OF_MONOOXYGENASE_ACTIVITY           | -0.93 | 0.26 | 0 | 0 | 0 | not significant |
| 6282 | GO_PHOSPHATIDYLINOSITOL_4_PHOSPHATE_BINDING                | -0.93 | 0.26 | 0 | 0 | 0 | not significant |
| 6283 | GO_POSITIVE_REGULATION_OF_BONE_RESORPTION                  | -0.93 | 0.26 | 0 | 0 | 0 | not significant |
| 6284 | GO_PURINE_NUCLEOSIDE_TRIPHOSPHATE_CATABOLIC_PROCESS        | -0.93 | 0.26 | 0 | 0 | 0 | not significant |
| 6285 | GO_REGULATION_OF_CELLULAR_RESPONSE_TO_HYPOXIA              | -0.93 | 0.26 | 0 | 0 | 0 | not significant |
| 6286 | GO_REGULATION_OF_TRANSLATION_IN_RESPONSE_TO_ENDOPLASMIC    | -0.93 | 0.26 | 0 | 0 | 0 | not significant |
| 6287 | GO_SINGLE_STRANDED_DNA_DEPENDENT_ATPASE_ACTIVITY           | -0.93 | 0.26 | 0 | 0 | 0 | not significant |
| 6288 | REACTOME_DOWNREGULATION_OF_TGF_BETA_RECEPTOR_SIGNALING     | -0.93 | 0.26 | 0 | 0 | 0 | not significant |
| 6289 | REACTOME_INACTIVATION_OF_CDC42_AND_RAC1                    | -0.93 | 0.26 | 0 | 0 | 0 | not significant |
| 6290 | REACTOME_SENSING_OF_DNA_DOUBLE_STRAND_BREAKS               | -0.93 | 0.26 | 0 | 0 | 0 | not significant |
| 6291 | REACTOME_TRANSFERRIN_ENDOCYTOSIS_AND_RECYCLING             | -0.93 | 0.26 | 0 | 0 | 0 | not significant |
| 6292 | WANG_METASTASIS_OF_BREAST_CANCER_ESR1_DN                   | -0.93 | 0.26 | 0 | 0 | 0 | not significant |
| 6293 | BOWIE_RESPONSE_TO_TAMOXIFEN                                | -0.93 | 0.25 | 0 | 0 | 0 | not significant |
| 6294 | GO_GLOBAL_GENOME_NUCLEOTIDE_EXCISION_REPAIR                | -0.93 | 0.25 | 0 | 0 | 0 | not significant |
| 6295 | GO_HINDLIMB_MORPHOGENESIS                                  | -0.93 | 0.25 | 0 | 0 | 0 | not significant |
| 6296 | GO_POSITIVE_REGULATION_OF_FIBROBLAST_GROWTH_FACTOR_RECE    | -0.93 | 0.25 | 0 | 0 | 0 | not significant |
| 6297 | GO_REGULATION_OF_COENZYME_METABOLIC_PROCESS                | -0.93 | 0.25 | 0 | 0 | 0 | not significant |
| 6298 | GO_SYNAPTIC_CLEFT                                          | -0.93 | 0.25 | 0 | 0 | 0 | not significant |
| 6299 | KEGG_SNARE_INTERACTIONS_IN_VESICULAR_TRANSPORT             | -0.93 | 0.25 | 0 | 0 | 0 | not significant |
| 6300 | KOHUTEK_CCNT1_TARGETS                                      | -0.93 | 0.25 | 0 | 0 | 0 | not significant |
| 6301 | MOROSSETTI_FACIOSCAPULOHUMERAL_MUSCULAR_DISTROPHY_UP       | -0.93 | 0.25 | 0 | 0 | 0 | not significant |
| 6302 | MYLLYKANGAS_AMPLIFICATION_HOT_SPOT_23                      | -0.93 | 0.25 | 0 | 0 | 0 | not significant |
| 6303 | REACTOME_DEFECTIVE_B4GALT7_CAUSES_EDS_PROGEROID_TYPE       | -0.93 | 0.25 | 0 | 0 | 0 | not significant |
| 6304 | SATO_SILENCED_BY_METHYLATION_IN_PANCREATIC_CANCER_2        | -0.93 | 0.25 | 0 | 0 | 0 | not significant |
| 6305 | TORCHIA_TARGETS_OF_EWSR1_FLI1_FUSION_TOP20_UP              | -0.93 | 0.25 | 0 | 0 | 0 | not significant |
| 6306 | BIOCARTA_PELP1_PATHWAY                                     | -0.93 | 0.24 | 0 | 0 | 0 | not significant |
| 6307 | GO_AMYLOID_BETA_BINDING                                    | -0.93 | 0.24 | 0 | 0 | 0 | not significant |
| 6308 | GO_CLEAVAGE_FURROW                                         | -0.93 | 0.24 | 0 | 0 | 0 | not significant |
| 6309 | GO_ORGANOPHOSPHATE_ESTER_TRANSMEMBRANE_TRANSPORTER_AI      | -0.93 | 0.24 | 0 | 0 | 0 | not significant |
| 6310 | GO_OXIDOREDUCTASE_ACTIVITY_ACTING_ON_THE_ALDEHYDE_OR_OX    | -0.93 | 0.24 | 0 | 0 | 0 | not significant |

|      |                                                            |       |      |   |   |   |                 |
|------|------------------------------------------------------------|-------|------|---|---|---|-----------------|
| 6311 | GO_PHOSPHATIDYLCHOLINE_BIOSYNTHETIC_PROCESS                | -0.93 | 0.24 | 0 | 0 | 0 | not significant |
| 6312 | GO_POSITIVE_REGULATION_OF_REACTIVE_OXYGEN_SPECIES_BIOSYNT  | -0.93 | 0.24 | 0 | 0 | 0 | not significant |
| 6313 | GO_REGULATION_OF_FILOPODIUM_ASSEMBLY                       | -0.93 | 0.24 | 0 | 0 | 0 | not significant |
| 6314 | REACTOME_SIGNALING_BY_MET                                  | -0.93 | 0.24 | 0 | 0 | 0 | not significant |
| 6315 | CHR11Q12                                                   | -0.93 | 0.23 | 0 | 0 | 0 | not significant |
| 6316 | CHR5Q33                                                    | -0.93 | 0.23 | 0 | 0 | 0 | not significant |
| 6317 | GO_CALCIIUM_CHANNEL_COMPLEX                                | -0.93 | 0.23 | 0 | 0 | 0 | not significant |
| 6318 | GO_EXOPEPTIDASE_ACTIVITY                                   | -0.93 | 0.23 | 0 | 0 | 0 | not significant |
| 6319 | GO_MORPHOGENESIS_OF_A_BRANCHED_STRUCTURE                   | -0.93 | 0.23 | 0 | 0 | 0 | not significant |
| 6320 | GO_REGULATION_OF_MITOCHONDRIAL_OUTER_MEMBRANE_PERMEABIL    | -0.93 | 0.23 | 0 | 0 | 0 | not significant |
| 6321 | GO_VESICLE_CYTOSKELETAL_TRAFFICKING                        | -0.93 | 0.23 | 0 | 0 | 0 | not significant |
| 6322 | MINGUEZ_LIVER_CANCER_VASCULAR_INVASION_UP                  | -0.93 | 0.23 | 0 | 0 | 0 | not significant |
| 6323 | PASINI_SUZ12_TARGETS_UP                                    | -0.93 | 0.23 | 0 | 0 | 0 | not significant |
| 6324 | DAVICIONI_TARGETS_OF_PAX_FOXP1_FUSIONS_DN                  | -0.93 | 0.22 | 0 | 0 | 0 | not significant |
| 6325 | GO_ATPASE_BINDING                                          | -0.93 | 0.22 | 0 | 0 | 0 | not significant |
| 6326 | GO_CELL_DIVISION_SITE                                      | -0.93 | 0.22 | 0 | 0 | 0 | not significant |
| 6327 | GO_REGULATION_OF_RESPONSE_TO_ENDOPLASMIC_RETICULUM_STRE    | -0.93 | 0.22 | 0 | 0 | 0 | not significant |
| 6328 | REACTOME_BIOSYNTHESIS_OF_THE_N_GLYCAN_PRECURSOR_DOLICHIC   | -0.93 | 0.22 | 0 | 0 | 0 | not significant |
| 6329 | REACTOME_DUAL_INCISION_IN_GG_NER                           | -0.93 | 0.22 | 0 | 0 | 0 | not significant |
| 6330 | SASSON_RESPONSE_TO_FORSKOLIN_DN                            | -0.93 | 0.22 | 0 | 0 | 0 | not significant |
| 6331 | GO_CONDENSED_NUCLEAR_CHROMOSOME                            | -0.93 | 0.21 | 0 | 0 | 0 | not significant |
| 6332 | REACTOME_HATS_ACETYLATE_HISTONES                           | -0.93 | 0.21 | 0 | 0 | 0 | not significant |
| 6333 | GO_ATPASE_COMPLEX                                          | -0.93 | 0.20 | 0 | 0 | 0 | not significant |
| 6334 | GO_MYELOID_CELL_DEVELOPMENT                                | -0.93 | 0.20 | 0 | 0 | 0 | not significant |
| 6335 | GO_PEPTIDE_HORMONE_SECRETION                               | -0.93 | 0.20 | 0 | 0 | 0 | not significant |
| 6336 | NRL_DN.V1_DN                                               | -0.93 | 0.20 | 0 | 0 | 0 | not significant |
| 6337 | REACTOME_RUNX1_REGULATES_GENES_INVOLVED_IN_MEGAKARYOCY     | -0.93 | 0.20 | 0 | 0 | 0 | not significant |
| 6338 | GO_NEGATIVE_REGULATION_OF_PROTEIN_SERINE_THREONINE_KINASE  | -0.93 | 0.18 | 0 | 0 | 0 | not significant |
| 6339 | REACTOME_SLC_MEDIATED_TRANSMEMBRANE_TRANSPORT              | -0.93 | 0.18 | 0 | 0 | 0 | not significant |
| 6340 | GO_GLUTAMATERGIC_SYNAPSE                                   | -0.93 | 0.16 | 0 | 0 | 0 | not significant |
| 6341 | GO_UBIQUITIN_LIKE_PROTEIN_LIGASE_BINDING                   | -0.93 | 0.16 | 0 | 0 | 0 | not significant |
| 6342 | GO_CELL_GROWTH                                             | -0.93 | 0.15 | 0 | 0 | 0 | not significant |
| 6343 | GO_POSITIVE_REGULATION_OF_CATABOLIC_PROCESS                | -0.93 | 0.15 | 0 | 0 | 0 | not significant |
| 6344 | OISHI_CHOLANGIOMA_STEM_CELL_LIKE_UP                        | -0.93 | 0.14 | 0 | 0 | 0 | not significant |
| 6345 | GO_CELLULAR_LIPID_METABOLIC_PROCESS                        | -0.93 | 0.11 | 0 | 0 | 0 | not significant |
| 6346 | GO_MICROTUBULE_CYTOSKELETON                                | -0.93 | 0.08 | 0 | 0 | 0 | not significant |
| 6347 | GO_CELL_PROJECTION_ORGANIZATION                            | -0.93 | 0.04 | 0 | 0 | 0 | not significant |
| 6348 | MARSON_BOUND_BY_FOXP3_UNSTIMULATED                         | -0.93 | 0.03 | 0 | 0 | 0 | not significant |
| 6349 | GO_WHOLE_MEMBRANE                                          | -0.93 | 0.02 | 0 | 0 | 0 | not significant |
| 6350 | GO_AMINE_CATABOLIC_PROCESS                                 | -0.92 | 0.28 | 0 | 0 | 0 | not significant |
| 6351 | CHR3P26                                                    | -0.92 | 0.27 | 0 | 0 | 0 | not significant |
| 6352 | GO_BASE_EXCISION_REPAIR_AP_SITE_FORMATION                  | -0.92 | 0.27 | 0 | 0 | 0 | not significant |
| 6353 | GO_CLATHRIN_ADAPTOR_COMPLEX                                | -0.92 | 0.27 | 0 | 0 | 0 | not significant |
| 6354 | GO_PHOSPHATASE_ACTIVATOR_ACTIVITY                          | -0.92 | 0.27 | 0 | 0 | 0 | not significant |
| 6355 | GO_PROTEIN_ACTIVATION_CASCADE                              | -0.92 | 0.27 | 0 | 0 | 0 | not significant |
| 6356 | PID_RHOA_REG_PATHWAY                                       | -0.92 | 0.27 | 0 | 0 | 0 | not significant |
| 6357 | BIOCARTA_EIF_PATHWAY                                       | -0.92 | 0.26 | 0 | 0 | 0 | not significant |
| 6358 | CONRAD_STEM_CELL                                           | -0.92 | 0.26 | 0 | 0 | 0 | not significant |
| 6359 | GO_CELLULAR_TRIGLYCERIDE_HOMEOSTASIS                       | -0.92 | 0.26 | 0 | 0 | 0 | not significant |
| 6360 | GO_CHAPERONE_MEDIATED_PROTEIN_TRANSPORT                    | -0.92 | 0.26 | 0 | 0 | 0 | not significant |
| 6361 | GO_GOLGI_RIBBON_FORMATION                                  | -0.92 | 0.26 | 0 | 0 | 0 | not significant |
| 6362 | GO_MYOSIN_V_BINDING                                        | -0.92 | 0.26 | 0 | 0 | 0 | not significant |
| 6363 | GO_RNA_SPLICING_VIA_ENDONUCLEOLYTIC_CLEAVAGE_AND_LIGATION  | -0.92 | 0.26 | 0 | 0 | 0 | not significant |
| 6364 | GO_SUBPALLIUM_DEVELOPMENT                                  | -0.92 | 0.26 | 0 | 0 | 0 | not significant |
| 6365 | SCHLINGEMANN_SKIN_CARCINOGENESIS_TPA_UP                    | -0.92 | 0.26 | 0 | 0 | 0 | not significant |
| 6366 | YIH_RESPONSE_TO_ARSENITE_C4                                | -0.92 | 0.26 | 0 | 0 | 0 | not significant |
| 6367 | ZHENG_RESPONSE_TO_ARSENITE_DN                              | -0.92 | 0.26 | 0 | 0 | 0 | not significant |
| 6368 | BIOCARTA_REELIN_PATHWAY                                    | -0.92 | 0.25 | 0 | 0 | 0 | not significant |
| 6369 | GO_BROWN_FAT_CELL_DIFFERENTIATION                          | -0.92 | 0.25 | 0 | 0 | 0 | not significant |
| 6370 | GO_FMN_BINDING                                             | -0.92 | 0.25 | 0 | 0 | 0 | not significant |
| 6371 | GO_INSULIN_LIKE_GROWTH_FACTOR_RECEPTOR_BINDING             | -0.92 | 0.25 | 0 | 0 | 0 | not significant |
| 6372 | GO_NEGATIVE_REGULATION_OF_B_CELL_RECEPTOR_SIGNALING_PATH   | -0.92 | 0.25 | 0 | 0 | 0 | not significant |
| 6373 | GO_NEURON_FATE_COMMITMENT                                  | -0.92 | 0.25 | 0 | 0 | 0 | not significant |
| 6374 | GO_PHOSPHATIDYLINOSITOL_MONOPHOSPHATE_PHOSPHATASE_ACTIVI   | -0.92 | 0.25 | 0 | 0 | 0 | not significant |
| 6375 | GO_POLAR_MICROTUBULE                                       | -0.92 | 0.25 | 0 | 0 | 0 | not significant |
| 6376 | GO_POSITIVE_REGULATION_OF_COLLATERAL_SPROUTING             | -0.92 | 0.25 | 0 | 0 | 0 | not significant |
| 6377 | GO_POSITIVE_REGULATION_OF_DNA_DAMAGE_RESPONSE_SIGNAL_TR    | -0.92 | 0.25 | 0 | 0 | 0 | not significant |
| 6378 | GO_PROTEIN_LOCALIZATION_TO_MEMBRANE_RAFT                   | -0.92 | 0.25 | 0 | 0 | 0 | not significant |
| 6379 | GO_REGULATION_OF_POSITIVE_CHEMOTAXIS                       | -0.92 | 0.25 | 0 | 0 | 0 | not significant |
| 6380 | GO_RIBOSOME_DISASSEMBLY                                    | -0.92 | 0.25 | 0 | 0 | 0 | not significant |
| 6381 | IIZUKA_LIVER_CANCER_PROGRESSION_G1_G2_UP                   | -0.92 | 0.25 | 0 | 0 | 0 | not significant |
| 6382 | KEGG_NITROGEN_METABOLISM                                   | -0.92 | 0.25 | 0 | 0 | 0 | not significant |
| 6383 | KORKOLA_EMBRYONIC_CARCINOMA_VS_SEMINOMA_UP                 | -0.92 | 0.25 | 0 | 0 | 0 | not significant |
| 6384 | LIAN_NEUTROPHIL_GNANULE_CONSTITUENTS                       | -0.92 | 0.25 | 0 | 0 | 0 | not significant |
| 6385 | REACTOME_SIGNALING_TO_ERKS                                 | -0.92 | 0.25 | 0 | 0 | 0 | not significant |
| 6386 | REACTOME_SYNTHESIS_OF_PIP3_AT_THE_LATE_ENDOSOME_MEMBRAN    | -0.92 | 0.25 | 0 | 0 | 0 | not significant |
| 6387 | SCHRAETS_MLL_TARGETS_UP                                    | -0.92 | 0.25 | 0 | 0 | 0 | not significant |
| 6388 | BOYLAN_MULTIPLE_MYELOMA_C_UP                               | -0.92 | 0.24 | 0 | 0 | 0 | not significant |
| 6389 | GO_COPPER_ION_BINDING                                      | -0.92 | 0.24 | 0 | 0 | 0 | not significant |
| 6390 | GO_MIRNA_BINDING                                           | -0.92 | 0.24 | 0 | 0 | 0 | not significant |
| 6391 | GO_NEGATIVE_REGULATION_OF_MACROAUTOPHAGY                   | -0.92 | 0.24 | 0 | 0 | 0 | not significant |
| 6392 | GO_POSITIVE_REGULATION_OF_ANIMAL_ORGAN_MORPHOGENESIS       | -0.92 | 0.24 | 0 | 0 | 0 | not significant |
| 6393 | GO_POSITIVE_REGULATION_OF_ERAD_PATHWAY                     | -0.92 | 0.24 | 0 | 0 | 0 | not significant |
| 6394 | GO_REGULATION_OF_CELL_COMMUNICATION_BY_ELECTRICAL_COUPLI   | -0.92 | 0.24 | 0 | 0 | 0 | not significant |
| 6395 | REACTOME_EICOSANOID_LIGAND_BINDING_RECEPTORS               | -0.92 | 0.24 | 0 | 0 | 0 | not significant |
| 6396 | FRASOR_TAMOXIFEN_RESPONSE_UP                               | -0.92 | 0.23 | 0 | 0 | 0 | not significant |
| 6397 | GO_NEGATIVE_REGULATION_OF_INTRINSIC_APOPTOTIC_SIGNALING_PA | -0.92 | 0.23 | 0 | 0 | 0 | not significant |
| 6398 | GO_POSITIVE_REGULATION_OF_COLLAGEN_BIOSYNTHETIC_PROCESS    | -0.92 | 0.23 | 0 | 0 | 0 | not significant |
| 6399 | GO_REGULATION_OF_MEIOTIC_NUCLEAR_DIVISION                  | -0.92 | 0.23 | 0 | 0 | 0 | not significant |
| 6400 | SATO_SILENCED_BY_DEACETYLATION_IN_PANCREATIC_CANCER        | -0.92 | 0.23 | 0 | 0 | 0 | not significant |
| 6401 | GO_NEGATIVE_REGULATION_OF_PROTEIN_DEPHOSPHORYLATION        | -0.92 | 0.22 | 0 | 0 | 0 | not significant |
| 6402 | GO_RETROGRADE_VESICLE_MEDIATED_TRANSPORT_GOLGI_TO_ENDO     | -0.92 | 0.22 | 0 | 0 | 0 | not significant |
| 6403 | KEGG_STARCH_AND_SUCROSE_METABOLISM                         | -0.92 | 0.22 | 0 | 0 | 0 | not significant |
| 6404 | KONDO_COLON_CANCER_HCP_WITH_H3K27ME1                       | -0.92 | 0.22 | 0 | 0 | 0 | not significant |
| 6405 | REACTOME_POST_TRANSLATIONAL_MODIFICATION_SYNTHESIS_OF_GF   | -0.92 | 0.22 | 0 | 0 | 0 | not significant |
| 6406 | RIZKI_TUMOR_INVASIVENESS_2D_UP                             | -0.92 | 0.22 | 0 | 0 | 0 | not significant |
| 6407 | TURASHVILI_BREAST_DUCTAL_CARCINOMA_VS_LOBULAR_NORMAL_UP    | -0.92 | 0.22 | 0 | 0 | 0 | not significant |
| 6408 | CRX_NRL_DN.V1_UP                                           | -0.92 | 0.21 | 0 | 0 | 0 | not significant |
| 6409 | GO_SMAD_BINDING                                            | -0.92 | 0.21 | 0 | 0 | 0 | not significant |
| 6410 | REACTOME_EPH_EPHRIN_MEDIATED_REPULSION_OF_CELLS            | -0.92 | 0.21 | 0 | 0 | 0 | not significant |
| 6411 | BYSTRYKH_HEMATOPOIESIS_STEM_CELL_AND_BRAIN_QTL_CIS         | -0.92 | 0.20 | 0 | 0 | 0 | not significant |
| 6412 | GO_CELLULAR_RESPONSE_TO_HYDROGEN_PEROXIDE                  | -0.92 | 0.20 | 0 | 0 | 0 | not significant |
| 6413 | GO_NEUROTRANSMITTER_METABOLIC_PROCESS                      | -0.92 | 0.20 | 0 | 0 | 0 | not significant |
| 6414 | SASSON_RESPONSE_TO_GONADOTROPHINS_DN                       | -0.92 | 0.20 | 0 | 0 | 0 | not significant |
| 6415 | CHARADONNA_NEOPLASTIC_TRANSFORMATION_KRAS_UP               | -0.92 | 0.19 | 0 | 0 | 0 | not significant |
| 6416 | GO_NEGATIVE_REGULATION_OF_CYTOSKELETON_ORGANIZATION        | -0.92 | 0.19 | 0 | 0 | 0 | not significant |
| 6417 | SONG_TARGETS_OF_IE86_CMV_PROTEIN                           | -0.92 | 0.19 | 0 | 0 | 0 | not significant |
| 6418 | ZHANG_TARGETS_OF_EWSR1_FLI1_FUSION                         | -0.92 | 0.19 | 0 | 0 | 0 | not significant |
| 6419 | GO_CYTOSKELETON_DEPENDENT_INTRACELLULAR_TRANSPORT          | -0.92 | 0.18 | 0 | 0 | 0 | not significant |

|      |                                                            |       |      |   |   |   |                 |
|------|------------------------------------------------------------|-------|------|---|---|---|-----------------|
| 6420 | GO_CULLIN_RING_UBIQUITIN_LIGASE_COMPLEX                    | -0.92 | 0.17 | 0 | 0 | 0 | not significant |
| 6421 | GO_NUCLEAR_MATRIX                                          | -0.92 | 0.17 | 0 | 0 | 0 | not significant |
| 6422 | GO_SODIUM_ION_TRANSPORT                                    | -0.92 | 0.17 | 0 | 0 | 0 | not significant |
| 6423 | DEBIASI_APOPTOSIS_BY_REOVIRUS_INFECTION_UP                 | -0.92 | 0.13 | 0 | 0 | 0 | not significant |
| 6424 | GO_POSITIVE_REGULATION_OF_GTPASE_ACTIVITY                  | -0.92 | 0.13 | 0 | 0 | 0 | not significant |
| 6425 | GO_PROTEIN_HETERODIMERIZATION_ACTIVITY                     | -0.92 | 0.12 | 0 | 0 | 0 | not significant |
| 6426 | GO_REGULATION_OF_CELLULAR_COMPONENT_BIOGENESIS             | -0.92 | 0.07 | 0 | 0 | 0 | not significant |
| 6427 | GO_NEURON_DEVELOPMENT                                      | -0.92 | 0.06 | 0 | 0 | 0 | not significant |
| 6428 | GO_NUCLEAR_BODY                                            | -0.92 | 0.05 | 0 | 0 | 0 | not significant |
| 6429 | GO_ENDOPLASMIC_RETICULUM                                   | -0.92 | 0.03 | 0 | 0 | 0 | not significant |
| 6430 | GO_NUCLEOSIDE_DIPHOSPHATE_KINASE_ACTIVITY                  | -0.91 | 0.27 | 0 | 0 | 0 | not significant |
| 6431 | REACTOME_REGULATION_BY_C_FLIP                              | -0.91 | 0.27 | 0 | 0 | 0 | not significant |
| 6432 | GO_HAIR_FOLLICLE_MATURATION                                | -0.91 | 0.26 | 0 | 0 | 0 | not significant |
| 6433 | GO_REPLICATIVE_SENESCENCE                                  | -0.91 | 0.26 | 0 | 0 | 0 | not significant |
| 6434 | INAMURA_LUNG_CANCER_SCC_UP                                 | -0.91 | 0.26 | 0 | 0 | 0 | not significant |
| 6435 | REACTOME_A_TETRASACCHARIDE_LINKER_SEQUENCE_IS_REQUIRED_F   | -0.91 | 0.26 | 0 | 0 | 0 | not significant |
| 6436 | REACTOME_LOSS_OF_FUNCTION_OF_TGFBFR1_IN_CANCER             | -0.91 | 0.26 | 0 | 0 | 0 | not significant |
| 6437 | VALK_AML_CLUSTER_6                                         | -0.91 | 0.26 | 0 | 0 | 0 | not significant |
| 6438 | CHR11P12                                                   | -0.91 | 0.25 | 0 | 0 | 0 | not significant |
| 6439 | GO_CELLULAR_RESPONSE_TO_LEUCINE                            | -0.91 | 0.25 | 0 | 0 | 0 | not significant |
| 6440 | GO_ORGANELLE_INHERITANCE                                   | -0.91 | 0.25 | 0 | 0 | 0 | not significant |
| 6441 | GO_POSTSYNAPTIC_CYTOSOL                                    | -0.91 | 0.25 | 0 | 0 | 0 | not significant |
| 6442 | GO_REGULATION_OF_PLATELET_DERIVED_GROWTH_FACTOR_RECEPT     | -0.91 | 0.25 | 0 | 0 | 0 | not significant |
| 6443 | HESSON_TUMOR_SUPPRESSOR_CLUSTER_3P21_3                     | -0.91 | 0.25 | 0 | 0 | 0 | not significant |
| 6444 | WANG_BARRETTES_ESOPHAGUS_AND_ESOPHAGUS_CANCER_UP           | -0.91 | 0.25 | 0 | 0 | 0 | not significant |
| 6445 | WEBER_METHYLATED_IN_COLON_CANCER                           | -0.91 | 0.25 | 0 | 0 | 0 | not significant |
| 6446 | BIOCARTA_ERK_PATHWAY                                       | -0.91 | 0.24 | 0 | 0 | 0 | not significant |
| 6447 | CARDOSO_RESPONSE_TO_GAMMA_RADIATION_AND_3AB                | -0.91 | 0.24 | 0 | 0 | 0 | not significant |
| 6448 | CHESLER_BRAIN_HIGHEST_GENETIC_VARIANCE                     | -0.91 | 0.24 | 0 | 0 | 0 | not significant |
| 6449 | GO_ACTIVATION_OF_JNK_ACTIVITY                              | -0.91 | 0.24 | 0 | 0 | 0 | not significant |
| 6450 | GO_DYNACTIN_COMPLEX                                        | -0.91 | 0.24 | 0 | 0 | 0 | not significant |
| 6451 | GO_HISTONE_H3_K36_METHYLATION                              | -0.91 | 0.24 | 0 | 0 | 0 | not significant |
| 6452 | GO_LONG_CHAIN_FATTY_ACID_IMPORT_INTO_CELL                  | -0.91 | 0.24 | 0 | 0 | 0 | not significant |
| 6453 | GO_MAMMARY_GLAND_ALVEOLUS_DEVELOPMENT                      | -0.91 | 0.24 | 0 | 0 | 0 | not significant |
| 6454 | GO_MICROFILAMENT_MOTOR_ACTIVITY                            | -0.91 | 0.24 | 0 | 0 | 0 | not significant |
| 6455 | GO_MITOCHONDRIAL_DNA_METABOLIC_PROCESS                     | -0.91 | 0.24 | 0 | 0 | 0 | not significant |
| 6456 | GO_NEGATIVE_REGULATION_OF_AMINE_TRANSPORT                  | -0.91 | 0.24 | 0 | 0 | 0 | not significant |
| 6457 | GO_NEGATIVE_REGULATION_OF_PROTEIN_ACETYLTATION             | -0.91 | 0.24 | 0 | 0 | 0 | not significant |
| 6458 | GO_NEGATIVE_REGULATION_OF_SPROUTING_ANGIOGENESIS           | -0.91 | 0.24 | 0 | 0 | 0 | not significant |
| 6459 | GO_POLYADENYLATION_DEPENDENT_SNORNA_3_END_PROCESSING       | -0.91 | 0.24 | 0 | 0 | 0 | not significant |
| 6460 | GO_POSITIVE_REGULATION_OF_B_CELL_RECEPTOR_SIGNALING_PATHW  | -0.91 | 0.24 | 0 | 0 | 0 | not significant |
| 6461 | GO_POSITIVE_REGULATION_OF_CARDIAC_MUSCLE_TISSUE_DEVELOPMI  | -0.91 | 0.24 | 0 | 0 | 0 | not significant |
| 6462 | GO_POSITIVE_REGULATION_OF_EXTRINSIC_APOPTOTIC_SIGNALING_PA | -0.91 | 0.24 | 0 | 0 | 0 | not significant |
| 6463 | GO_RESPIRATORY_SYSTEM_PROCESS                              | -0.91 | 0.24 | 0 | 0 | 0 | not significant |
| 6464 | GO_SIGNAL_TRANSDUCTION_INVOLVED_IN_G2_DNA_DAMAGE_CHECKPC   | -0.91 | 0.24 | 0 | 0 | 0 | not significant |
| 6465 | GO_UDP_GLUCOSYLTRANSFERASE_ACTIVITY                        | -0.91 | 0.24 | 0 | 0 | 0 | not significant |
| 6466 | PID_EPHA_FWDPATHWAY                                        | -0.91 | 0.24 | 0 | 0 | 0 | not significant |
| 6467 | AMIT_EGF_RESPONSE_20_MCF10A                                | -0.91 | 0.23 | 0 | 0 | 0 | not significant |
| 6468 | GO_ARP2_3_COMPLEX_MEDIATED_ACTIN_NUCLEATION                | -0.91 | 0.23 | 0 | 0 | 0 | not significant |
| 6469 | GO ASPARTATE METABOLIC PROCESS                             | -0.91 | 0.23 | 0 | 0 | 0 | not significant |
| 6470 | GO_DIACYLGLYCEROL_BINDING                                  | -0.91 | 0.23 | 0 | 0 | 0 | not significant |
| 6471 | GO_NEGATIVE_REGULATION_OF_INCLUSION_BODY_ASSEMBLY          | -0.91 | 0.23 | 0 | 0 | 0 | not significant |
| 6472 | GO_NEGATIVE_REGULATION_OF_INTRACELLULAR_ESTROGEN_RECEPT    | -0.91 | 0.23 | 0 | 0 | 0 | not significant |
| 6473 | GO_NEGATIVE_REGULATION_OF_UBIQUITIN_DEPENDENT_PROTEIN_CAT  | -0.91 | 0.23 | 0 | 0 | 0 | not significant |
| 6474 | GO_PEPTIDYL_CYSSTEINE_MODIFICATION                         | -0.91 | 0.23 | 0 | 0 | 0 | not significant |
| 6475 | GO_POSITIVE_REGULATION_OF_PRODUCTION_OF_MIRNAS_INVOLVED_I  | -0.91 | 0.23 | 0 | 0 | 0 | not significant |
| 6476 | GO_REGULATION_OF_TRANSLATIONAL_INITIATION_IN_RESPONSE_TO_S | -0.91 | 0.23 | 0 | 0 | 0 | not significant |
| 6477 | CHR6Q25                                                    | -0.91 | 0.22 | 0 | 0 | 0 | not significant |
| 6478 | ELLWOOD_MYC_TARGETS_DN                                     | -0.91 | 0.22 | 0 | 0 | 0 | not significant |
| 6479 | FIGUEROA_AML_METHYLATION_CLUSTER_5_DN                      | -0.91 | 0.22 | 0 | 0 | 0 | not significant |
| 6480 | GO_MEMBRANE_PROTEIN_PROTEOLYSIS                            | -0.91 | 0.22 | 0 | 0 | 0 | not significant |
| 6481 | GO_NEGATIVE_REGULATION_OF_SODIUM_ION_TRANSPORT             | -0.91 | 0.22 | 0 | 0 | 0 | not significant |
| 6482 | GO_REGULATION_OF_ENDOPLASMIC_RETICULUM_STRESS_INDUCED_IN   | -0.91 | 0.22 | 0 | 0 | 0 | not significant |
| 6483 | GO_REGULATION_OF_GLUCCOSE_TRANSMEMBRANE_TRANSPORT          | -0.91 | 0.22 | 0 | 0 | 0 | not significant |
| 6484 | GO_REGULATION_OF_MITOTIC_SPINDLE_ASSEMBLY                  | -0.91 | 0.22 | 0 | 0 | 0 | not significant |
| 6485 | GO_SCHWANN_CELL_DEVELOPMENT                                | -0.91 | 0.22 | 0 | 0 | 0 | not significant |
| 6486 | GO_WOUND_HEALING_SPREADING_OF_EPIDERMAL_CELLS              | -0.91 | 0.22 | 0 | 0 | 0 | not significant |
| 6487 | GENTILE_UV_RESPONSE_CLUSTER_D2                             | -0.91 | 0.21 | 0 | 0 | 0 | not significant |
| 6488 | GO_MEGAKARYOCYTE_DIFFERENTIATION                           | -0.91 | 0.21 | 0 | 0 | 0 | not significant |
| 6489 | GO_RAC_GTPASE_BINDING                                      | -0.91 | 0.21 | 0 | 0 | 0 | not significant |
| 6490 | REACTOME_ION_TRANSPORT_BY_P_TYPE_ATPASES                   | -0.91 | 0.21 | 0 | 0 | 0 | not significant |
| 6491 | COATES_MACROPHAGE_M1_VS_M2_UP                              | -0.91 | 0.20 | 0 | 0 | 0 | not significant |
| 6492 | GARGALOVIC_RESPONSE_TO_OXIDIZED_PHOSPHOLIPIDS_GREY_DN      | -0.91 | 0.20 | 0 | 0 | 0 | not significant |
| 6493 | GO_CONTRACTILE_ACTIN_FILAMENT_BUNDLE_ASSEMBLY              | -0.91 | 0.20 | 0 | 0 | 0 | not significant |
| 6494 | GO_CORTICAL_ACTIN_CYTOSKELETON                             | -0.91 | 0.20 | 0 | 0 | 0 | not significant |
| 6495 | GO_G1_DNA_DAMAGE_CHECKPOINT                                | -0.91 | 0.20 | 0 | 0 | 0 | not significant |
| 6496 | GO_PROTEIN_CONTAINING_COMPLEX_SCAFFOLD_ACTIVITY            | -0.91 | 0.20 | 0 | 0 | 0 | not significant |
| 6497 | GO_REGULATION_OF_ESTABLISHMENT_OF_PROTEIN_LOCALIZATION_TC  | -0.91 | 0.20 | 0 | 0 | 0 | not significant |
| 6498 | CHR15Q15                                                   | -0.91 | 0.19 | 0 | 0 | 0 | not significant |
| 6499 | GO_EXONUCLEASE_ACTIVITY                                    | -0.91 | 0.19 | 0 | 0 | 0 | not significant |
| 6500 | GO_REACTIVE_OXYGEN_SPECIES_BIOSYNTHETIC_PROCESS            | -0.91 | 0.19 | 0 | 0 | 0 | not significant |
| 6501 | GO_REGULATION_OF_EPITHELIAL_TO_MESENCHYMAL_TRANSITION      | -0.91 | 0.19 | 0 | 0 | 0 | not significant |
| 6502 | ALCALA_APOPTOSIS                                           | -0.91 | 0.18 | 0 | 0 | 0 | not significant |
| 6503 | CHR9Q34                                                    | -0.91 | 0.18 | 0 | 0 | 0 | not significant |
| 6504 | GO_EPITHELIAL_TO_MESENCHYMAL_TRANSITION                    | -0.91 | 0.18 | 0 | 0 | 0 | not significant |
| 6505 | GO_MESENCHYME_DEVELOPMENT                                  | -0.91 | 0.17 | 0 | 0 | 0 | not significant |
| 6506 | MULLIGHAN_NPM1_MUTATED_SIGNATURE_1_DN                      | -0.91 | 0.17 | 0 | 0 | 0 | not significant |
| 6507 | NIKOLSKY_BREAST_CANCER_11Q12_Q14_AMPICON                   | -0.91 | 0.16 | 0 | 0 | 0 | not significant |
| 6508 | GO_POSITIVE_REGULATION_OF_CYTOSKELETON_ORGANIZATION        | -0.91 | 0.15 | 0 | 0 | 0 | not significant |
| 6509 | GO_REGULATION_OF_ENDOCYTOSIS                               | -0.91 | 0.15 | 0 | 0 | 0 | not significant |
| 6510 | GO_TRANSMEMBRANE_RECEPTOR_PROTEIN_SERINE_THREONINE_KINAS   | -0.91 | 0.14 | 0 | 0 | 0 | not significant |
| 6511 | GO_AXON_PART                                               | -0.91 | 0.13 | 0 | 0 | 0 | not significant |
| 6512 | GO_DENDRITE_DEVELOPMENT                                    | -0.91 | 0.12 | 0 | 0 | 0 | not significant |
| 6513 | GO_EARLY_ENDOSOME                                          | -0.91 | 0.12 | 0 | 0 | 0 | not significant |
| 6514 | GO_REGULATION_OF_ANATOMICAL_STRUCTURE_SIZE                 | -0.91 | 0.11 | 0 | 0 | 0 | not significant |
| 6515 | AGUIRRE_PANCREATIC_CANCER_COPY_NUMBER_UP                   | -0.91 | 0.10 | 0 | 0 | 0 | not significant |
| 6516 | GO_SIGNAL_TRANSDUCTION_BY_P53_CLASS_MEDIATOR               | -0.91 | 0.10 | 0 | 0 | 0 | not significant |
| 6517 | GO_NEGATIVE_REGULATION_OF_INTRACELLULAR_SIGNAL_TRANSDUCT   | -0.91 | 0.09 | 0 | 0 | 0 | not significant |
| 6518 | MIKKELSEN_NPC_ICP_WITH_H3K4ME3                             | -0.91 | 0.09 | 0 | 0 | 0 | not significant |
| 6519 | GO_ORGANELLE_ASSEMBLY                                      | -0.91 | 0.04 | 0 | 0 | 0 | not significant |
| 6520 | GO_TRANSFERASE_ACTIVITY_TRANSFERRING_PHOSPHORUS_CONTAINI   | -0.91 | 0.04 | 0 | 0 | 0 | not significant |
| 6521 | GO_NEGATIVE_REGULATION_OF_EPITHELIAL_TO_MESENCHYMAL_TRAN   | -0.90 | 0.25 | 0 | 0 | 0 | not significant |
| 6522 | GO_REGULATION_OF_NEUROTRANSMITTER_UPTAKE                   | -0.90 | 0.25 | 0 | 0 | 0 | not significant |
| 6523 | GO_VIRAL_TRANSLATION                                       | -0.90 | 0.25 | 0 | 0 | 0 | not significant |
| 6524 | REACTOME_SIGNALLING_TO_RAS                                 | -0.90 | 0.25 | 0 | 0 | 0 | not significant |
| 6525 | GO_CGMP_MEDIATED_SIGNALING                                 | -0.90 | 0.24 | 0 | 0 | 0 | not significant |
| 6526 | GO_GTP_DEPENDENT_PROTEIN_BINDING                           | -0.90 | 0.24 | 0 | 0 | 0 | not significant |
| 6527 | GO_MAINTENANCE_OF_SYNAPSE_STRUCTURE                        | -0.90 | 0.24 | 0 | 0 | 0 | not significant |
| 6528 | GO_NUCLEOSIDE_MONOPHOSPHATE_PHOSPHORYLTATION               | -0.90 | 0.24 | 0 | 0 | 0 | not significant |

|      |                                                          |       |      |   |   |   |                 |
|------|----------------------------------------------------------|-------|------|---|---|---|-----------------|
| 6529 | REACTOME_BETA_OXIDATION_OF_PRISTANOYL_COA                | -0.90 | 0.24 | 0 | 0 | 0 | not significant |
| 6530 | WOTTON_RUNX_TARGETS_DN                                   | -0.90 | 0.24 | 0 | 0 | 0 | not significant |
| 6531 | BIOCARTA_RAS_PATHWAY                                     | -0.90 | 0.23 | 0 | 0 | 0 | not significant |
| 6532 | CHR3Q24                                                  | -0.90 | 0.23 | 0 | 0 | 0 | not significant |
| 6533 | GAUSSMANN_MLL_AF4_FUSION_TARGETS_C_DN                    | -0.90 | 0.23 | 0 | 0 | 0 | not significant |
| 6534 | GO_ADIPONECTIN_ACTIVATED_SIGNALING_PATHWAY               | -0.90 | 0.23 | 0 | 0 | 0 | not significant |
| 6535 | GO_GLYCOSAMINE_CONTAINING_COMPOUND_METABOLIC_PROCESS     | -0.90 | 0.23 | 0 | 0 | 0 | not significant |
| 6536 | GO_MITOGEN_ACTIVATED_PROTEIN_KINASE_P38_BINDING          | -0.90 | 0.23 | 0 | 0 | 0 | not significant |
| 6537 | GO_NEGATIVE_REGULATION_OF_FIBROBLAST_MIGRATION           | -0.90 | 0.23 | 0 | 0 | 0 | not significant |
| 6538 | GO_OUTER_DYNEIN_ARM_ASSEMBLY                             | -0.90 | 0.23 | 0 | 0 | 0 | not significant |
| 6539 | GO_POSITIVE_REGULATION_OF_PATHWAY_RESTRICTED_SMAD_PROTE  | -0.90 | 0.23 | 0 | 0 | 0 | not significant |
| 6540 | GO_PROTEIN_SERINE_THREONINE_KINASE_INHIBITOR_ACTIVITY    | -0.90 | 0.23 | 0 | 0 | 0 | not significant |
| 6541 | GO_REGULATION_OF_LYSOSOMAL_PROTEIN_CATABOLIC_PROCESS     | -0.90 | 0.23 | 0 | 0 | 0 | not significant |
| 6542 | GO_REGULATION_OF_MONOCYTE_DIFFERENTIATION                | -0.90 | 0.23 | 0 | 0 | 0 | not significant |
| 6543 | GO_STRUCTURAL_CONSTITUENT_OF_MUSCLE                      | -0.90 | 0.23 | 0 | 0 | 0 | not significant |
| 6544 | MELLMAN_TUT1_TARGETS_UP                                  | -0.90 | 0.23 | 0 | 0 | 0 | not significant |
| 6545 | NUMATA_CSF3_SIGNALING_VIA_STAT3                          | -0.90 | 0.23 | 0 | 0 | 0 | not significant |
| 6546 | PEPPER_CHRONIC_LYMPHOCYTTIC_LEUKEMIA_DN                  | -0.90 | 0.23 | 0 | 0 | 0 | not significant |
| 6547 | AIYAR_COBRA1_TARGETS_UP                                  | -0.90 | 0.22 | 0 | 0 | 0 | not significant |
| 6548 | ANDERSEN_CHOLANGIOCARCINOMA_CLASS1                       | -0.90 | 0.22 | 0 | 0 | 0 | not significant |
| 6549 | CHR2P16                                                  | -0.90 | 0.22 | 0 | 0 | 0 | not significant |
| 6550 | GO_AMYLOID_PRECURSOR_PROTEIN_CATABOLIC_PROCESS           | -0.90 | 0.22 | 0 | 0 | 0 | not significant |
| 6551 | GO_ANOIKIS                                               | -0.90 | 0.22 | 0 | 0 | 0 | not significant |
| 6552 | GO_DYNEIN_COMPLEX_BINDING                                | -0.90 | 0.22 | 0 | 0 | 0 | not significant |
| 6553 | GO_HSP70_PROTEIN_BINDING                                 | -0.90 | 0.22 | 0 | 0 | 0 | not significant |
| 6554 | GO_INTERLEUKIN_8_SECRETION                               | -0.90 | 0.22 | 0 | 0 | 0 | not significant |
| 6555 | GO_OSTEOCLAST_DEVELOPMENT                                | -0.90 | 0.22 | 0 | 0 | 0 | not significant |
| 6556 | GO_REGULATION_OF_GLIAL_CELL_APOPTOTIC_PROCESS            | -0.90 | 0.22 | 0 | 0 | 0 | not significant |
| 6557 | GO_REGULATION_OF_KIDNEY_DEVELOPMENT                      | -0.90 | 0.22 | 0 | 0 | 0 | not significant |
| 6558 | MADAN_DPP4_TARGETS                                       | -0.90 | 0.22 | 0 | 0 | 0 | not significant |
| 6559 | PID_INTEGRIN1_PATHWAY                                    | -0.90 | 0.22 | 0 | 0 | 0 | not significant |
| 6560 | REACTOME_SYNTHESIS_OF_IP3_AND_IP4_IN_THE_CYTOSOL         | -0.90 | 0.22 | 0 | 0 | 0 | not significant |
| 6561 | GO_BASEMENT_MEMBRANE                                     | -0.90 | 0.21 | 0 | 0 | 0 | not significant |
| 6562 | GO_CALMODULIN_DEPENDENT_PROTEIN_KINASE_ACTIVITY          | -0.90 | 0.21 | 0 | 0 | 0 | not significant |
| 6563 | GO_ESTROGEN_RECEPTOR_BINDING                             | -0.90 | 0.21 | 0 | 0 | 0 | not significant |
| 6564 | GO_NEGATIVE_REGULATION_OF_REACTIVE_OXYGEN_SPECIES_METAB  | -0.90 | 0.21 | 0 | 0 | 0 | not significant |
| 6565 | GO_NUCLEAR_UBIQUITIN_LIGASE_COMPLEX                      | -0.90 | 0.21 | 0 | 0 | 0 | not significant |
| 6566 | GO_POSITIVE_REGULATION_OF_PROTEIN_TARGETING_TO_MEMBRANE  | -0.90 | 0.21 | 0 | 0 | 0 | not significant |
| 6567 | GO_POST_EMBRYONIC_ANIMAL_ORGAN_DEVELOPMENT               | -0.90 | 0.21 | 0 | 0 | 0 | not significant |
| 6568 | GO_SECRETION_BY_TISSUE                                   | -0.90 | 0.21 | 0 | 0 | 0 | not significant |
| 6569 | NUTT_GBM_VS_AO_GLIOMA_DN                                 | -0.90 | 0.21 | 0 | 0 | 0 | not significant |
| 6570 | CHR3Q29                                                  | -0.90 | 0.20 | 0 | 0 | 0 | not significant |
| 6571 | GO_EXORIBONUCLEASE_ACTIVITY                              | -0.90 | 0.20 | 0 | 0 | 0 | not significant |
| 6572 | GO_POSITIVE_REGULATION_OF_P38MAPK_CASCADE                | -0.90 | 0.20 | 0 | 0 | 0 | not significant |
| 6573 | GO_THYMOCYTE_APOPTOTIC_PROCESS                           | -0.90 | 0.20 | 0 | 0 | 0 | not significant |
| 6574 | VANTVEER_BREAST_CANCER_POOR_PROGNOSIS                    | -0.90 | 0.20 | 0 | 0 | 0 | not significant |
| 6575 | CHR22Q12                                                 | -0.90 | 0.19 | 0 | 0 | 0 | not significant |
| 6576 | GO_CELLULAR_EXTRAVASATION                                | -0.90 | 0.19 | 0 | 0 | 0 | not significant |
| 6577 | GO_RECEPTOR_INTERNALIZATION                              | -0.90 | 0.19 | 0 | 0 | 0 | not significant |
| 6578 | GO_SITE_OF_DNA_DAMAGE                                    | -0.90 | 0.19 | 0 | 0 | 0 | not significant |
| 6579 | GO_SPECIFIC_GROANULE_MEMBRANE                            | -0.90 | 0.19 | 0 | 0 | 0 | not significant |
| 6580 | KEGG_DILATED_CARDIOMYOPATHY                              | -0.90 | 0.19 | 0 | 0 | 0 | not significant |
| 6581 | KYNG_DNA_DAMAGE_BY_GAMMA_RADIATION                       | -0.90 | 0.19 | 0 | 0 | 0 | not significant |
| 6582 | PID_P53_REGULATION_PATHWAY                               | -0.90 | 0.19 | 0 | 0 | 0 | not significant |
| 6583 | GO_POSITIVE_REGULATION_OF_LEUKOCYTE_MIGRATION            | -0.90 | 0.18 | 0 | 0 | 0 | not significant |
| 6584 | GO_TISSUE_REMODELING                                     | -0.90 | 0.18 | 0 | 0 | 0 | not significant |
| 6585 | GO_VASCULAR_ENDOTHELIAL_GROWTH_FACTOR_RECEPTOR_SIGNALI   | -0.90 | 0.18 | 0 | 0 | 0 | not significant |
| 6586 | KEGG_LONG_TERM_POTENTIATION                              | -0.90 | 0.18 | 0 | 0 | 0 | not significant |
| 6587 | STEIN_ESR1_TARGETS                                       | -0.90 | 0.18 | 0 | 0 | 0 | not significant |
| 6588 | GO_CARDIAC_SEPTUM_DEVELOPMENT                            | -0.90 | 0.17 | 0 | 0 | 0 | not significant |
| 6589 | GO_PERIPHERAL_NERVOUS_SYSTEM_DEVELOPMENT                 | -0.90 | 0.17 | 0 | 0 | 0 | not significant |
| 6590 | KEGG_RENAL_CELL_CARCINOMA                                | -0.90 | 0.17 | 0 | 0 | 0 | not significant |
| 6591 | GO_CELLULAR_RESPONSE_TO_LIGHT_STIMULUS                   | -0.90 | 0.16 | 0 | 0 | 0 | not significant |
| 6592 | NOTCH_DNV1_UP                                            | -0.90 | 0.16 | 0 | 0 | 0 | not significant |
| 6593 | GO_NEGATIVE_REGULATION_OF_RESPONSE_TO_EXTERNAL_STIMULUS  | -0.90 | 0.15 | 0 | 0 | 0 | not significant |
| 6594 | FIRESTEIN_PROLIFERATION                                  | -0.90 | 0.13 | 0 | 0 | 0 | not significant |
| 6595 | GO_REGULATION_OF_SIGNAL_TRANSDUCTION_BY_P53_CLASS_MEDIAT | -0.90 | 0.13 | 0 | 0 | 0 | not significant |
| 6596 | GO_PEPTIDYL_SERINE_MODIFICATION                          | -0.90 | 0.12 | 0 | 0 | 0 | not significant |
| 6597 | GO_POSITIVE_REGULATION_OF_GROWTH                         | -0.90 | 0.12 | 0 | 0 | 0 | not significant |
| 6598 | GO_FOREBRAIN_DEVELOPMENT                                 | -0.90 | 0.10 | 0 | 0 | 0 | not significant |
| 6599 | GO_POSITIVE_REGULATION_OF_CELL_PROJECTION_ORGANIZATION   | -0.90 | 0.10 | 0 | 0 | 0 | not significant |
| 6600 | GO_RESPONSE_TO_LIGHT_STIMULUS                            | -0.90 | 0.09 | 0 | 0 | 0 | not significant |
| 6601 | TBK1_DF_DN                                               | -0.90 | 0.09 | 0 | 0 | 0 | not significant |
| 6602 | GO_ION_TRANSMEMBRANE_TRANSPORTER_ACTIVITY                | -0.90 | 0.06 | 0 | 0 | 0 | not significant |
| 6603 | GO_NEGATIVE_REGULATION_OF_PROTEIN_MODIFICATION_PROCESS   | -0.90 | 0.06 | 0 | 0 | 0 | not significant |
| 6604 | GO_I_SMAD_BINDING                                        | -0.89 | 0.24 | 0 | 0 | 0 | not significant |
| 6605 | GO_POSITIVE_REGULATION_OF_CELL_CYCLE_CHECKPOINT          | -0.89 | 0.24 | 0 | 0 | 0 | not significant |
| 6606 | GO_RESPONSE_TO_LEUCINE                                   | -0.89 | 0.24 | 0 | 0 | 0 | not significant |
| 6607 | GO_TRANSLATION_REPRESSOR_ACTIVITY_MRNA_REGULATORY_ELEME  | -0.89 | 0.24 | 0 | 0 | 0 | not significant |
| 6608 | GO_VOLUNTARY_MUSCULOSKELETAL_MOVEMENT                    | -0.89 | 0.24 | 0 | 0 | 0 | not significant |
| 6609 | YAMASHITA_METHYLATED_IN_PROSTATE_CANCER                  | -0.89 | 0.24 | 0 | 0 | 0 | not significant |
| 6610 | GO_AP_1_ADAPTOR_COMPLEX                                  | -0.89 | 0.23 | 0 | 0 | 0 | not significant |
| 6611 | GO_AXONEMAL_DYNEIN_COMPLEX_ASSEMBLY                      | -0.89 | 0.23 | 0 | 0 | 0 | not significant |
| 6612 | GO_CELLULAR_ALDEHYDE_METABOLIC_PROCESS                   | -0.89 | 0.23 | 0 | 0 | 0 | not significant |
| 6613 | GO_FLOTILLIN_COMPLEX                                     | -0.89 | 0.23 | 0 | 0 | 0 | not significant |
| 6614 | GO_LSM2_8_COMPLEX                                        | -0.89 | 0.23 | 0 | 0 | 0 | not significant |
| 6615 | GO_REGULATION_OF_GLYCOGEN_CATABOLIC_PROCESS              | -0.89 | 0.23 | 0 | 0 | 0 | not significant |
| 6616 | GO_REGULATION_OF_HISTONE_DEACETYLASE_ACTIVITY            | -0.89 | 0.23 | 0 | 0 | 0 | not significant |
| 6617 | GO_WOUND_HEALING_INVOLVED_IN_INFLAMMATORY_RESPONSE       | -0.89 | 0.23 | 0 | 0 | 0 | not significant |
| 6618 | ONDER_CDH1_TARGETS_3_DN                                  | -0.89 | 0.23 | 0 | 0 | 0 | not significant |
| 6619 | REACTOME_NOTCH4_INTRACELLULAR_DOMAIN_REGULATES_TRANSCRI  | -0.89 | 0.23 | 0 | 0 | 0 | not significant |
| 6620 | WIERENGA_PML_INTERACTOME                                 | -0.89 | 0.23 | 0 | 0 | 0 | not significant |
| 6621 | ZHAN_MULTIPLE_MYELOMA_MS_UP                              | -0.89 | 0.23 | 0 | 0 | 0 | not significant |
| 6622 | BIOCARTA_CCR3_PATHWAY                                    | -0.89 | 0.22 | 0 | 0 | 0 | not significant |
| 6623 | DAZARD_UV_RESPONSE_CLUSTER_G28                           | -0.89 | 0.22 | 0 | 0 | 0 | not significant |
| 6624 | GO_ACETYLCHOLINE_BINDING                                 | -0.89 | 0.22 | 0 | 0 | 0 | not significant |
| 6625 | GO_CHONDROCYTE_DEVELOPMENT_INVOLVED_IN_ENDOCHONDRAL_BC   | -0.89 | 0.22 | 0 | 0 | 0 | not significant |
| 6626 | GO_POLY_PYRIMIDINE_TRACT_BINDING                         | -0.89 | 0.22 | 0 | 0 | 0 | not significant |
| 6627 | GO_REGULATION_OF_POSTSYNAPTIC_MEMBRANE_ORGANIZATION      | -0.89 | 0.22 | 0 | 0 | 0 | not significant |
| 6628 | GO_REGULATION_OF_RESPIRATORY_SYSTEM_PROCESS              | -0.89 | 0.22 | 0 | 0 | 0 | not significant |
| 6629 | GO_RESPONSE_TO_IMMOBILIZATION_STRESS                     | -0.89 | 0.22 | 0 | 0 | 0 | not significant |
| 6630 | GO_VENTRAL_SPINAL_CORD_DEVELOPMENT                       | -0.89 | 0.22 | 0 | 0 | 0 | not significant |
| 6631 | IZUKA_LIVER_CANCER_PROGRESSION_G2_G3_UP                  | -0.89 | 0.22 | 0 | 0 | 0 | not significant |
| 6632 | MCCABE_HOXC6_TARGETS_CANCER_DN                           | -0.89 | 0.22 | 0 | 0 | 0 | not significant |
| 6633 | NEWMAN_ERCC6_TARGETS_UP                                  | -0.89 | 0.22 | 0 | 0 | 0 | not significant |
| 6634 | REACTOME_CRMPS_IN_SEMA3A_SIGNALING                       | -0.89 | 0.22 | 0 | 0 | 0 | not significant |
| 6635 | REACTOME_METABOLISM_OF_FOLATE_AND_PTERINES               | -0.89 | 0.22 | 0 | 0 | 0 | not significant |
| 6636 | SA_PTEN_PATHWAY                                          | -0.89 | 0.22 | 0 | 0 | 0 | not significant |
| 6637 | GO_CELLULAR_RESPONSE_TO_REACTIVE_NITROGEN_SPECIES        | -0.89 | 0.21 | 0 | 0 | 0 | not significant |

|      |                                                             |       |      |   |   |   |                 |
|------|-------------------------------------------------------------|-------|------|---|---|---|-----------------|
| 6638 | GO_NEGATIVE_REGULATION_OF_INFLAMMATORY_RESPONSE_TO_ANTK     | -0.89 | 0.21 | 0 | 0 | 0 | not significant |
| 6639 | GO_NEGATIVE_REGULATION_OF_T_CELL_DIFFERENTIATION            | -0.89 | 0.21 | 0 | 0 | 0 | not significant |
| 6640 | GO_PEPIDYL_LYSINE_DIMETHYLATION                             | -0.89 | 0.21 | 0 | 0 | 0 | not significant |
| 6641 | GO_POSITIVE_REGULATION_OF_CHOLESTEROL_EFFLUX                | -0.89 | 0.21 | 0 | 0 | 0 | not significant |
| 6642 | GO_PRIMARY_MIRNA_PROCESSING                                 | -0.89 | 0.21 | 0 | 0 | 0 | not significant |
| 6643 | GO_REGULATION_OF_GRANULOCYTE_CHEMOTAXIS                     | -0.89 | 0.21 | 0 | 0 | 0 | not significant |
| 6644 | GO_REGULATION_OF_PRODUCTION_OF_SMALL_RNA_INVOLVED_IN_GEN    | -0.89 | 0.21 | 0 | 0 | 0 | not significant |
| 6645 | GO_RESPONSE_TO_COCAINE                                      | -0.89 | 0.21 | 0 | 0 | 0 | not significant |
| 6646 | GO_STEROID_HORMONE_SECRETION                                | -0.89 | 0.21 | 0 | 0 | 0 | not significant |
| 6647 | GO_TUBULIN_COMPLEX_ASSEMBLY                                 | -0.89 | 0.21 | 0 | 0 | 0 | not significant |
| 6648 | GO_VESICLE_TRANSPORT_ALONG_ACTIN_FILAMENT                   | -0.89 | 0.21 | 0 | 0 | 0 | not significant |
| 6649 | HASLINGER_B_CELL_WITH_13Q14_DELETION                        | -0.89 | 0.21 | 0 | 0 | 0 | not significant |
| 6650 | REACTOME_PLATELET_CALCIIUM_HOMEOSTASIS                      | -0.89 | 0.21 | 0 | 0 | 0 | not significant |
| 6651 | REACTOME_RHO_GTPASES_ACTIVATION_CIT                         | -0.89 | 0.21 | 0 | 0 | 0 | not significant |
| 6652 | ULE_SPLICING_VIA_NOVA2                                      | -0.89 | 0.21 | 0 | 0 | 0 | not significant |
| 6653 | ZEMBUSU_SENSITIVITY_TO_VINBLASTINE                          | -0.89 | 0.21 | 0 | 0 | 0 | not significant |
| 6654 | GO_LIPASE_ACTIVITY                                          | -0.89 | 0.20 | 0 | 0 | 0 | not significant |
| 6655 | GO_PROTEIN_QUALITY_CONTROL_FOR_MISFOLDED_OR_INCOMPLETELET   | -0.89 | 0.20 | 0 | 0 | 0 | not significant |
| 6656 | GO_RESPIRATORY_GASEOUS_EXCHANGE                             | -0.89 | 0.20 | 0 | 0 | 0 | not significant |
| 6657 | GO_U2_SNRNP                                                 | -0.89 | 0.20 | 0 | 0 | 0 | not significant |
| 6658 | KUMAMOTO_RESPONSE_TO_NUTLIN_3A_UP                           | -0.89 | 0.20 | 0 | 0 | 0 | not significant |
| 6659 | BIOCARTA_TOLL_PATHWAY                                       | -0.89 | 0.19 | 0 | 0 | 0 | not significant |
| 6660 | GO_AMINOPEPTIDASE_ACTIVITY                                  | -0.89 | 0.19 | 0 | 0 | 0 | not significant |
| 6661 | GO_CHROMATIN_REMODELING_AT_CENTROMERE                       | -0.89 | 0.19 | 0 | 0 | 0 | not significant |
| 6662 | GO_REGULATION_OF_INTRACELLULAR_ESTROGEN_RECEPTOR_SIGNAL     | -0.89 | 0.19 | 0 | 0 | 0 | not significant |
| 6663 | AMIT_EGF_RESPONSE_120_MCF10A                                | -0.89 | 0.18 | 0 | 0 | 0 | not significant |
| 6664 | GAVIN_FOXP3_TARGETS_CLUSTER_P7                              | -0.89 | 0.18 | 0 | 0 | 0 | not significant |
| 6665 | GO_REGULATION_OF_PROTEIN_TARGETING_TO_MITOCHONDRION         | -0.89 | 0.18 | 0 | 0 | 0 | not significant |
| 6666 | GO_REGULATION_OF_SMOOTHENED_SIGNALING_PATHWAY               | -0.89 | 0.18 | 0 | 0 | 0 | not significant |
| 6667 | NELSON_RESPONSE_TO_ANDROGEN_UP                              | -0.89 | 0.18 | 0 | 0 | 0 | not significant |
| 6668 | ZHOU_TNF_SIGNALING_4HR                                      | -0.89 | 0.18 | 0 | 0 | 0 | not significant |
| 6669 | CADWELL_ATG16L1_TARGETS_DN                                  | -0.89 | 0.17 | 0 | 0 | 0 | not significant |
| 6670 | HILLION_HMG1_TARGETS                                        | -0.89 | 0.17 | 0 | 0 | 0 | not significant |
| 6671 | GO_REGULATION_OF_FAT_CELL_DIFFERENTIATION                   | -0.89 | 0.16 | 0 | 0 | 0 | not significant |
| 6672 | GO_CELLULAR_RESPONSE_TO_UV                                  | -0.89 | 0.15 | 0 | 0 | 0 | not significant |
| 6673 | GO_CLATHRIN_COATED_VESICLE_MEMBRANE                         | -0.89 | 0.15 | 0 | 0 | 0 | not significant |
| 6674 | GO_UBIQUITIN_LIKE_PROTEIN_BINDING                           | -0.89 | 0.15 | 0 | 0 | 0 | not significant |
| 6675 | GO_NEUROTRANSMITTER_TRANSPORT                               | -0.89 | 0.14 | 0 | 0 | 0 | not significant |
| 6676 | GO_REGULATION_OF_DENDRITE_DEVELOPMENT                       | -0.89 | 0.14 | 0 | 0 | 0 | not significant |
| 6677 | AGUIRRE_PANCREATIC_CANCER_COPY_NUMBER_DN                    | -0.89 | 0.11 | 0 | 0 | 0 | not significant |
| 6678 | BRUIINS_LVC_RESPONSE_VIA_TP53_GROUP_B                       | -0.89 | 0.06 | 0 | 0 | 0 | not significant |
| 6679 | GO_GTPASE_BINDING                                           | -0.89 | 0.04 | 0 | 0 | 0 | not significant |
| 6680 | GO_PROTEIN_MODIFICATION_BY_SMALL_PROTEIN_CONJUGATION        | -0.89 | 0.02 | 0 | 0 | 0 | not significant |
| 6681 | GO_NUCLEOLASM_PART                                          | -0.89 | 0.00 | 0 | 0 | 0 | not significant |
| 6682 | GO_RIBONUCLEOPROTEIN_COMPLEX_DISASSEMBLY                    | -0.88 | 0.24 | 0 | 0 | 0 | not significant |
| 6683 | BIOCARTA_LAIR_PATHWAY                                       | -0.88 | 0.23 | 0 | 0 | 0 | not significant |
| 6684 | GO_OXIDOREDUCTASE_ACTIVITY_ACTING_ON_A_SULFUR_GROUP_OF_I    | -0.88 | 0.23 | 0 | 0 | 0 | not significant |
| 6685 | RORIE_TARGETS_OF_EWSR1_FL11_FUSION_UP                       | -0.88 | 0.23 | 0 | 0 | 0 | not significant |
| 6686 | WU_HBX_TARGETS_1_UP                                         | -0.88 | 0.23 | 0 | 0 | 0 | not significant |
| 6687 | GO_AMPA_GLUTAMATE_RECEPTOR_CLUSTERING                       | -0.88 | 0.22 | 0 | 0 | 0 | not significant |
| 6688 | GO_COENZYME_A_METABOLIC_PROCESS                             | -0.88 | 0.22 | 0 | 0 | 0 | not significant |
| 6689 | GO_HISTONE_PRE_MRNA_3_END_PROCESSING_COMPLEX                | -0.88 | 0.22 | 0 | 0 | 0 | not significant |
| 6690 | GO_MITOGEN_ACTIVATED_PROTEIN_KINASE_KINASE_BINDING          | -0.88 | 0.22 | 0 | 0 | 0 | not significant |
| 6691 | GO_O_ACETYLTRANSFERASE_ACTIVITY                             | -0.88 | 0.22 | 0 | 0 | 0 | not significant |
| 6692 | GO_REGULATION_OF_SKELETAL_MUSCLE_FIBER_DEVELOPMENT          | -0.88 | 0.22 | 0 | 0 | 0 | not significant |
| 6693 | REACTOME_REGULATION_OF_PYRUVATE_DEHYDROGENASE_PDH_COM       | -0.88 | 0.22 | 0 | 0 | 0 | not significant |
| 6694 | BEGUM_TARGETS_OF_PAX3_FOXO1_FUSION_DN                       | -0.88 | 0.21 | 0 | 0 | 0 | not significant |
| 6695 | GO_ACETYLCHOLINE_RECEPTOR_ACTIVITY                          | -0.88 | 0.21 | 0 | 0 | 0 | not significant |
| 6696 | GO_HISTONE_H2B_UBIQUITINATION                               | -0.88 | 0.21 | 0 | 0 | 0 | not significant |
| 6697 | GO_OXIDOREDUCTASE_ACTIVITY_ACTING_ON_THE_CH_NH2_GROUP_OF    | -0.88 | 0.21 | 0 | 0 | 0 | not significant |
| 6698 | GO_PERICARDIUM_DEVELOPMENT                                  | -0.88 | 0.21 | 0 | 0 | 0 | not significant |
| 6699 | GO_POSITIVE_REGULATION_OF_CELL_MIGRATION_BY_VASCULAR_ENDO   | -0.88 | 0.21 | 0 | 0 | 0 | not significant |
| 6700 | GO_REGULATION_OF_NEUTROPHIL_MIGRATION                       | -0.88 | 0.21 | 0 | 0 | 0 | not significant |
| 6701 | GO_TRICARBOXYLIC_ACID_METABOLIC_PROCESS                     | -0.88 | 0.21 | 0 | 0 | 0 | not significant |
| 6702 | PID_HES_HEY_PATHWAY                                         | -0.88 | 0.21 | 0 | 0 | 0 | not significant |
| 6703 | GO_ARGININE_CATABOLIC_PROCESS                               | -0.88 | 0.20 | 0 | 0 | 0 | not significant |
| 6704 | GO_CHAPERONE_MEDIATED_AUTOPHAGY                             | -0.88 | 0.20 | 0 | 0 | 0 | not significant |
| 6705 | GO_NUCLEOTIDE_SUGAR_METABOLIC_PROCESS                       | -0.88 | 0.20 | 0 | 0 | 0 | not significant |
| 6706 | GO_POSITIVE_REGULATION_OF_PHOSPHOPROTEIN_PHOSPHATASE_ACT    | -0.88 | 0.20 | 0 | 0 | 0 | not significant |
| 6707 | GO_POSITIVE_REGULATION_OF_SYNAPSE_ASSEMBLY                  | -0.88 | 0.20 | 0 | 0 | 0 | not significant |
| 6708 | REACTOME_INTERLEUKIN_37_SIGNALING                           | -0.88 | 0.20 | 0 | 0 | 0 | not significant |
| 6709 | REACTOME_INTERLEUKIN_RECEPTOR_SHC_SIGNALING                 | -0.88 | 0.20 | 0 | 0 | 0 | not significant |
| 6710 | SCHWAB_TARGETS_OF_BMYB_POLYMORPHIC_VARIANTS_UP              | -0.88 | 0.20 | 0 | 0 | 0 | not significant |
| 6711 | STEINER_ERYTHROCYTE_MEMBRANE_GENES                          | -0.88 | 0.20 | 0 | 0 | 0 | not significant |
| 6712 | TSENG_ADIPOGENIC_POTENTIAL_UP                               | -0.88 | 0.20 | 0 | 0 | 0 | not significant |
| 6713 | TURASHVILI_BREAST_LOBULAR_CARCINOMA_VS_DUCTAL_NORMAL_DN     | -0.88 | 0.20 | 0 | 0 | 0 | not significant |
| 6714 | ZHAN_VARIABLE_EARLY_DIFFERENTIATION_GENES_UP                | -0.88 | 0.20 | 0 | 0 | 0 | not significant |
| 6715 | GO_POSITIVE_REGULATION_OF_PROTEIN_EXPORT_FROM_NUCLEUS       | -0.88 | 0.19 | 0 | 0 | 0 | not significant |
| 6716 | GO_REGULATION_OF_PHOSPHOLIPID_METABOLIC_PROCESS             | -0.88 | 0.19 | 0 | 0 | 0 | not significant |
| 6717 | GO_SKELETAL_MUSCLE_ADAPTATION                               | -0.88 | 0.19 | 0 | 0 | 0 | not significant |
| 6718 | JIANG_TIP30_TARGETS_UP                                      | -0.88 | 0.19 | 0 | 0 | 0 | not significant |
| 6719 | MARTIN_NFKB_TARGETS_UP                                      | -0.88 | 0.19 | 0 | 0 | 0 | not significant |
| 6720 | BURTON_ADIPOGENESIS_7                                       | -0.88 | 0.18 | 0 | 0 | 0 | not significant |
| 6721 | GO_ENDOCRINE_PROCESS                                        | -0.88 | 0.18 | 0 | 0 | 0 | not significant |
| 6722 | GO_MONONUCLEAR_CELL_DIFFERENTIATION                         | -0.88 | 0.18 | 0 | 0 | 0 | not significant |
| 6723 | GO_NEGATIVE_REGULATION_OF_DNA_BINDING                       | -0.88 | 0.18 | 0 | 0 | 0 | not significant |
| 6724 | GO_POLYOL_CATABOLIC_PROCESS                                 | -0.88 | 0.18 | 0 | 0 | 0 | not significant |
| 6725 | GO_PROTEIN_INSERTION_INTO_MEMBRANE                          | -0.88 | 0.18 | 0 | 0 | 0 | not significant |
| 6726 | GO_SAGA_TYPE_COMPLEX                                        | -0.88 | 0.18 | 0 | 0 | 0 | not significant |
| 6727 | JIANG_AGING_HYPOTHALAMUS_DN                                 | -0.88 | 0.18 | 0 | 0 | 0 | not significant |
| 6728 | KAAB_FAILED_HEART_VENTRICLE_DN                              | -0.88 | 0.18 | 0 | 0 | 0 | not significant |
| 6729 | PID_IGF1_PATHWAY                                            | -0.88 | 0.18 | 0 | 0 | 0 | not significant |
| 6730 | REACTOME_PLASMA_LIPOPROTEIN_ASSEMBLY_REMODELING_AND_CLE     | -0.88 | 0.18 | 0 | 0 | 0 | not significant |
| 6731 | BIOCARTA_EIF4_PATHWAY                                       | -0.88 | 0.17 | 0 | 0 | 0 | not significant |
| 6732 | ZHAN_MULTIPLE_MYELOMA_CD1_VS_CD2_DN                         | -0.88 | 0.17 | 0 | 0 | 0 | not significant |
| 6733 | GO_DNA_SYNTHESIS_INVOLVED_IN_DNA_REPAIR                     | -0.88 | 0.16 | 0 | 0 | 0 | not significant |
| 6734 | GO_REGULATION_OF_PROTEIN_IMPORT                             | -0.88 | 0.15 | 0 | 0 | 0 | not significant |
| 6735 | BOUDOUKHA_BOUND_BY_IGF2BP2                                  | -0.88 | 0.14 | 0 | 0 | 0 | not significant |
| 6736 | GO_DEVELOPMENTAL_CELL_GROWTH                                | -0.88 | 0.12 | 0 | 0 | 0 | not significant |
| 6737 | GO_ACETYLTRANSFERASE_ACTIVITY                               | -0.88 | 0.10 | 0 | 0 | 0 | not significant |
| 6738 | ZHOU_INFLAMMATORY_RESPONSE_LVE_DN                           | -0.88 | 0.06 | 0 | 0 | 0 | not significant |
| 6739 | GO_CENTROSOME                                               | -0.88 | 0.03 | 0 | 0 | 0 | not significant |
| 6740 | GO_REGULATION_OF_MIRNA_METABOLIC_PROCESS                    | -0.87 | 0.23 | 0 | 0 | 0 | not significant |
| 6741 | GO_CYSSTEINE_TYPE_ENDOPEPTIDASE_INHIBITOR_ACTIVITY_INVOLVED | -0.87 | 0.22 | 0 | 0 | 0 | not significant |
| 6742 | GO_POSITIVE_REGULATION_OF_HEART_RATE                        | -0.87 | 0.22 | 0 | 0 | 0 | not significant |
| 6743 | GO_REGULATION_OF_RENAL_SYSTEM_PROCESS                       | -0.87 | 0.22 | 0 | 0 | 0 | not significant |
| 6744 | GO_RESPONSE_TO_MERCURY_ION                                  | -0.87 | 0.22 | 0 | 0 | 0 | not significant |
| 6745 | GO_UBIQUITIN_LIKE_MODIFIER_ACTIVATING_ENZYME_ACTIVITY       | -0.87 | 0.22 | 0 | 0 | 0 | not significant |
| 6746 | OUELLET_OVARIAN_CANCER_INVASIVE_VS_LMP_DN                   | -0.87 | 0.22 | 0 | 0 | 0 | not significant |

|      |                                                                   |       |      |   |   |   |                 |
|------|-------------------------------------------------------------------|-------|------|---|---|---|-----------------|
| 6747 | BIOCARTA_SODD_PATHWAY                                             | -0.87 | 0.21 | 0 | 0 | 0 | not significant |
| 6748 | GO_ACETYL_COA_BIOSYNTHETIC_PROCESS_FROM_PYRUVATE                  | -0.87 | 0.21 | 0 | 0 | 0 | not significant |
| 6749 | GO_LIPOPROTEIN_LOCALIZATION                                       | -0.87 | 0.21 | 0 | 0 | 0 | not significant |
| 6750 | GO_NEGATIVE_REGULATION_OF_CARDIAC_MUSCLE_CELL_DIFFERENTIATION     | -0.87 | 0.21 | 0 | 0 | 0 | not significant |
| 6751 | GO_POSITIVE_REGULATION_OF_INTERLEUKIN_6_SECRETION                 | -0.87 | 0.21 | 0 | 0 | 0 | not significant |
| 6752 | GO_PROTEIN_LOCALIZATION_TO_CELL_CORTEX                            | -0.87 | 0.21 | 0 | 0 | 0 | not significant |
| 6753 | GO_REGULATION_OF_PRESYNAPTIC_CYTOSOLIC_CALCIUM_ION_CONCENTRATION  | -0.87 | 0.21 | 0 | 0 | 0 | not significant |
| 6754 | GO_REGULATION_OF_T_CELL_CIRCLE_FORMATION                          | -0.87 | 0.21 | 0 | 0 | 0 | not significant |
| 6755 | GO_SUCKLING_BEHAVIOR                                              | -0.87 | 0.21 | 0 | 0 | 0 | not significant |
| 6756 | GO_SULFUR_AMINO_ACID_METABOLIC_PROCESS                            | -0.87 | 0.21 | 0 | 0 | 0 | not significant |
| 6757 | GO_U6_SNRNP                                                       | -0.87 | 0.21 | 0 | 0 | 0 | not significant |
| 6758 | VALK_AML_CLUSTER_1                                                | -0.87 | 0.21 | 0 | 0 | 0 | not significant |
| 6759 | YANAGIHARA_ESX1_TARGETS                                           | -0.87 | 0.21 | 0 | 0 | 0 | not significant |
| 6760 | GO_DEOXYRIBOSE_PHOSPHATE_CATABOLIC_PROCESS                        | -0.87 | 0.20 | 0 | 0 | 0 | not significant |
| 6761 | GO_DOPAMINERGIC_NEURON_DIFFERENTIATION                            | -0.87 | 0.20 | 0 | 0 | 0 | not significant |
| 6762 | GO_HEPATOCYTE_APOPTOTIC_PROCESS                                   | -0.87 | 0.20 | 0 | 0 | 0 | not significant |
| 6763 | GO_MYOBlast_PROLIFERATION                                         | -0.87 | 0.20 | 0 | 0 | 0 | not significant |
| 6764 | GO_PLUS_END_DIRECTED_ORGANELLE_TRANSPORT_ALONG_MICROTUBULE        | -0.87 | 0.20 | 0 | 0 | 0 | not significant |
| 6765 | GO_REGULATION_OF_ACTION_POTENTIAL                                 | -0.87 | 0.20 | 0 | 0 | 0 | not significant |
| 6766 | GO_THIOESTERASE_BINDING                                           | -0.87 | 0.20 | 0 | 0 | 0 | not significant |
| 6767 | GO_U1_SNRNA_BINDING                                               | -0.87 | 0.20 | 0 | 0 | 0 | not significant |
| 6768 | HOLLEMAN_PREDNISOLONE_RESISTANCE_ALL_UP                           | -0.87 | 0.20 | 0 | 0 | 0 | not significant |
| 6769 | INAMURA_LUNG_CANCER_SCC_SUBTYPES_UP                               | -0.87 | 0.20 | 0 | 0 | 0 | not significant |
| 6770 | BIOCARTA_NKCELLS_PATHWAY                                          | -0.87 | 0.19 | 0 | 0 | 0 | not significant |
| 6771 | BURTON_ADIPOGENESIS_1                                             | -0.87 | 0.19 | 0 | 0 | 0 | not significant |
| 6772 | GO_LIPOPROTEIN_CATABOLIC_PROCESS                                  | -0.87 | 0.19 | 0 | 0 | 0 | not significant |
| 6773 | GO_POSITIVE_REGULATION_OF_STRIATED_MUSCLE_CELL_DIFFERENTIATION    | -0.87 | 0.19 | 0 | 0 | 0 | not significant |
| 6774 | GO_REGULATION_OF_ANIMAL_ORGAN_FORMATION                           | -0.87 | 0.19 | 0 | 0 | 0 | not significant |
| 6775 | GO_REGULATION_OF_NEUROBLAST_PROLIFERATION                         | -0.87 | 0.19 | 0 | 0 | 0 | not significant |
| 6776 | REACTOME_GLYCOGEN_STORAGE_DISEASES                                | -0.87 | 0.19 | 0 | 0 | 0 | not significant |
| 6777 | REACTOME_ROLE_OF_PHOSPHOLIPIDS_IN_PHAGOCYTOSIS                    | -0.87 | 0.19 | 0 | 0 | 0 | not significant |
| 6778 | WANG_RESPONSE_TO_BEXAROTENE_DN                                    | -0.87 | 0.19 | 0 | 0 | 0 | not significant |
| 6779 | WENG_POR_TARGETS_GLOBAL_UP                                        | -0.87 | 0.19 | 0 | 0 | 0 | not significant |
| 6780 | YAP1_DN                                                           | -0.87 | 0.19 | 0 | 0 | 0 | not significant |
| 6781 | GO_POSITIVE_REGULATION_OF_MYELOID_LEUKOCYTE_MEDIATED_IMMUNITY     | -0.87 | 0.18 | 0 | 0 | 0 | not significant |
| 6782 | LIU_LIVER_CANCER                                                  | -0.87 | 0.18 | 0 | 0 | 0 | not significant |
| 6783 | PARENT_MTOR_SIGNALING_DN                                          | -0.87 | 0.18 | 0 | 0 | 0 | not significant |
| 6784 | PARK_HSC_AND_MULTIPOTENT_PROGENITORS                              | -0.87 | 0.18 | 0 | 0 | 0 | not significant |
| 6785 | PETROVA_PROX1_TARGETS_UP                                          | -0.87 | 0.18 | 0 | 0 | 0 | not significant |
| 6786 | REACTOME_PIWI_INTERACTING_RNA_PIRNA_BIOGENESIS                    | -0.87 | 0.18 | 0 | 0 | 0 | not significant |
| 6787 | CHR8Q21                                                           | -0.87 | 0.17 | 0 | 0 | 0 | not significant |
| 6788 | GO_CELLULAR_METABOLIC_COMPOUND_SALVAGE                            | -0.87 | 0.17 | 0 | 0 | 0 | not significant |
| 6789 | GO_MRNA_5_UTR_BINDING                                             | -0.87 | 0.17 | 0 | 0 | 0 | not significant |
| 6790 | PID_ER_NONGENOMIC_PATHWAY                                         | -0.87 | 0.17 | 0 | 0 | 0 | not significant |
| 6791 | GUO_HEX_TARGETS_UP                                                | -0.87 | 0.16 | 0 | 0 | 0 | not significant |
| 6792 | LEE_TARGETS_OF_PTCH1_AND_SUFU_UP                                  | -0.87 | 0.16 | 0 | 0 | 0 | not significant |
| 6793 | GO_APICAL_JUNCTION_ASSEMBLY                                       | -0.87 | 0.15 | 0 | 0 | 0 | not significant |
| 6794 | GO_POSITIVE_REGULATION_OF_ENDOCYTOSIS                             | -0.87 | 0.15 | 0 | 0 | 0 | not significant |
| 6795 | GO_REGULATION_OF_ANTIGEN_RECEPTOR_MEDIATED_SIGNALING_PATHWAY      | -0.87 | 0.15 | 0 | 0 | 0 | not significant |
| 6796 | GO_REGULATION_OF_CELL_JUNCTION_ASSEMBLY                           | -0.87 | 0.15 | 0 | 0 | 0 | not significant |
| 6797 | REACTOME_AMYLOID_FIBER_FORMATION                                  | -0.87 | 0.15 | 0 | 0 | 0 | not significant |
| 6798 | ZHAN_MULTIPLE_MYELOMA_CD1_AND_CD2_DN                              | -0.87 | 0.15 | 0 | 0 | 0 | not significant |
| 6799 | GO_CORTICAL_CYTOSKELETON                                          | -0.87 | 0.14 | 0 | 0 | 0 | not significant |
| 6800 | GO_RECYCLING_ENDOSOME_MEMBRANE                                    | -0.87 | 0.14 | 0 | 0 | 0 | not significant |
| 6801 | GO_SPLICEOSOMAL_COMPLEX_ASSEMBLY                                  | -0.87 | 0.14 | 0 | 0 | 0 | not significant |
| 6802 | GO_SYNAPTIC_VESICLE_EXOCYTOSIS                                    | -0.87 | 0.14 | 0 | 0 | 0 | not significant |
| 6803 | PRC1_BMI1_UP_V1_DN                                                | -0.87 | 0.14 | 0 | 0 | 0 | not significant |
| 6804 | REACTOME_TOLL_LIKE_RECEPTOR_TLR1:TLR2_CASCADE                     | -0.87 | 0.14 | 0 | 0 | 0 | not significant |
| 6805 | GO_ENSHEATHMENT_OF_NEURONS                                        | -0.87 | 0.13 | 0 | 0 | 0 | not significant |
| 6806 | GO_POSITIVE_REGULATION_OF_NEURON_DEATH                            | -0.87 | 0.13 | 0 | 0 | 0 | not significant |
| 6807 | GO_EARLY_ENDOSOME_MEMBRANE                                        | -0.87 | 0.12 | 0 | 0 | 0 | not significant |
| 6808 | GO_CALCIUM_ION_REGULATED_EXOCYTOSIS                               | -0.87 | 0.11 | 0 | 0 | 0 | not significant |
| 6809 | REACTOME_CLATHRIN_MEDIATED_ENDOCYTOSIS                            | -0.87 | 0.11 | 0 | 0 | 0 | not significant |
| 6810 | GO_REGULATION_OF_PROTEIN_CATABOLIC_PROCESS_IN_THE_VACUOLAR_SYSTEM | -0.86 | 0.22 | 0 | 0 | 0 | not significant |
| 6811 | RAMJAUAN_APOPTOSIS_BY_TGFB1_VIA_MAPK1_DN                          | -0.86 | 0.22 | 0 | 0 | 0 | not significant |
| 6812 | DACOSTA_LOW_DOSE_UV_RESPONSE_VIA_ERCC3_XPCS_UP                    | -0.86 | 0.21 | 0 | 0 | 0 | not significant |
| 6813 | KOINUMA_COLON_CANCER_MSI_DN                                       | -0.86 | 0.21 | 0 | 0 | 0 | not significant |
| 6814 | MCMURRAY_TP53_HRAS_COOPERATION_RESPONSE_UP                        | -0.86 | 0.21 | 0 | 0 | 0 | not significant |
| 6815 | BIOCARTA_VIP_PATHWAY                                              | -0.86 | 0.20 | 0 | 0 | 0 | not significant |
| 6816 | CHR9P21                                                           | -0.86 | 0.20 | 0 | 0 | 0 | not significant |
| 6817 | DASU_IL6_SIGNALING_SCAR_DN                                        | -0.86 | 0.20 | 0 | 0 | 0 | not significant |
| 6818 | GO_CELLULAR_RESPONSE_TO_IRON_ION                                  | -0.86 | 0.20 | 0 | 0 | 0 | not significant |
| 6819 | GO_CYTOPLASMIC_SEQUESTERING_OF_NF_KAPPAB                          | -0.86 | 0.20 | 0 | 0 | 0 | not significant |
| 6820 | GO_POSITIVE_REGULATION_BY_HOST_OF_VIRAL_TRANSCRIPTION             | -0.86 | 0.20 | 0 | 0 | 0 | not significant |
| 6821 | GO_POSITIVE_REGULATION_OF_ADHERENS_JUNCTION_ORGANIZATION          | -0.86 | 0.20 | 0 | 0 | 0 | not significant |
| 6822 | GO_POSITIVE_REGULATION_OF_AMINE_TRANSPORT                         | -0.86 | 0.20 | 0 | 0 | 0 | not significant |
| 6823 | GO_PURINERGIC_RECEPTOR_SIGNALING_PATHWAY                          | -0.86 | 0.20 | 0 | 0 | 0 | not significant |
| 6824 | STEGMEIER_PREMITOTIC_CELL_CYCLE_REGULATORS                        | -0.86 | 0.20 | 0 | 0 | 0 | not significant |
| 6825 | GO_ATPASE_ACTIVATOR_ACTIVITY                                      | -0.86 | 0.19 | 0 | 0 | 0 | not significant |
| 6826 | GO_CD95_DEATH_INDUCING_SIGNALING_COMPLEX                          | -0.86 | 0.19 | 0 | 0 | 0 | not significant |
| 6827 | GO_ENDOPLASMIC_RETICULUM_SUBCOMPARTMENT                           | -0.86 | 0.19 | 0 | 0 | 0 | not significant |
| 6828 | GO_FEMALE_PRONUCLEUS                                              | -0.86 | 0.19 | 0 | 0 | 0 | not significant |
| 6829 | GO_NEGATIVE_REGULATION_OF_HISTONE_ACETYLATION                     | -0.86 | 0.19 | 0 | 0 | 0 | not significant |
| 6830 | GO_NEUROTRANSMITTER_UPTAKE                                        | -0.86 | 0.19 | 0 | 0 | 0 | not significant |
| 6831 | GO_NUCLEAR_TRANSCRIPTIONAL_REPRESSOR_COMPLEX                      | -0.86 | 0.19 | 0 | 0 | 0 | not significant |
| 6832 | GO_PROTEIN_LOCALIZATION_TO_MICROTUBULE                            | -0.86 | 0.19 | 0 | 0 | 0 | not significant |
| 6833 | GO_RESPONSE_TO_HYDROPEROXIDE                                      | -0.86 | 0.19 | 0 | 0 | 0 | not significant |
| 6834 | MARKS_ACETYLATED_NON_HISTONE_PROTEINS                             | -0.86 | 0.19 | 0 | 0 | 0 | not significant |
| 6835 | ROYLANCE_BREAST_CANCER_16Q_COPY_NUMBER_DN                         | -0.86 | 0.19 | 0 | 0 | 0 | not significant |
| 6836 | GO_EPIDERMAL_GROWTH_FACTOR_RECEPTOR_BINDING                       | -0.86 | 0.18 | 0 | 0 | 0 | not significant |
| 6837 | GO_EPSILON_DNA_POLYMERASE_COMPLEX                                 | -0.86 | 0.18 | 0 | 0 | 0 | not significant |
| 6838 | GO_FERRIC_IRON_BINDING                                            | -0.86 | 0.18 | 0 | 0 | 0 | not significant |
| 6839 | GO_G_QUADRUPLEX_DNA_UNWINDING                                     | -0.86 | 0.18 | 0 | 0 | 0 | not significant |
| 6840 | GO_MITOTIC_SPINDLE_MIDZONE                                        | -0.86 | 0.18 | 0 | 0 | 0 | not significant |
| 6841 | GO_OLIGOSACCHARYLTRANSFERASE_COMPLEX                              | -0.86 | 0.18 | 0 | 0 | 0 | not significant |
| 6842 | GO_PHOSPHATIDYLINOSITOL_3_KINASE_REGULATOR_ACTIVITY               | -0.86 | 0.18 | 0 | 0 | 0 | not significant |
| 6843 | GO_REGULATION_OF_HISTONE_H3_K36_METHYLATION                       | -0.86 | 0.18 | 0 | 0 | 0 | not significant |
| 6844 | GO_REGULATION_OF_NEURON_MIGRATION                                 | -0.86 | 0.18 | 0 | 0 | 0 | not significant |
| 6845 | GO_REGULATION_OF_RHODOPsin_MEDIATED_SIGNALING_PATHWAY             | -0.86 | 0.18 | 0 | 0 | 0 | not significant |
| 6846 | MIKKELSEN_NPC_LCP_WITH_H3K4ME3                                    | -0.86 | 0.18 | 0 | 0 | 0 | not significant |
| 6847 | SHI_SPARC_TARGETS_UP                                              | -0.86 | 0.18 | 0 | 0 | 0 | not significant |
| 6848 | CHR16Q23                                                          | -0.86 | 0.17 | 0 | 0 | 0 | not significant |
| 6849 | CHR1Q31                                                           | -0.86 | 0.17 | 0 | 0 | 0 | not significant |
| 6850 | CHR5Q11                                                           | -0.86 | 0.17 | 0 | 0 | 0 | not significant |
| 6851 | GO_ENDOPLASMIC_RETICULUM_CALCIUM_ION_HOMEOSTASIS                  | -0.86 | 0.17 | 0 | 0 | 0 | not significant |
| 6852 | GO_IRES_DEPENDENT_VIRAL_TRANSLATIONAL_INITIATION                  | -0.86 | 0.17 | 0 | 0 | 0 | not significant |
| 6853 | GO_LABYRINTHINE_LAYER_DEVELOPMENT                                 | -0.86 | 0.17 | 0 | 0 | 0 | not significant |
| 6854 | GO_PRE_MRNA_BINDING                                               | -0.86 | 0.17 | 0 | 0 | 0 | not significant |
| 6855 | KEGG_REGULATION_OF_AUTOPHAGY                                      | -0.86 | 0.17 | 0 | 0 | 0 | not significant |



|      |                                                            |       |      |   |   |   |                 |
|------|------------------------------------------------------------|-------|------|---|---|---|-----------------|
| 6856 | MATZUK_CENTRAL_FOR_FEMALE_FERTILITY                        | -0.86 | 0.17 | 0 | 0 | 0 | not significant |
| 6857 | QI_HYPOXIA_TARGETS_OF_HIF1A_AND_FOXA2                      | -0.86 | 0.17 | 0 | 0 | 0 | not significant |
| 6858 | BIOCARTA_P38MAPK_PATHWAY                                   | -0.86 | 0.16 | 0 | 0 | 0 | not significant |
| 6859 | CHR2Q24                                                    | -0.86 | 0.16 | 0 | 0 | 0 | not significant |
| 6860 | GARGALOVIC_RESPONSE_TO_OXIDIZED_PHOSPHOLIPIDS_GREEN_DN     | -0.86 | 0.16 | 0 | 0 | 0 | not significant |
| 6861 | GO_KINETOCHORE_ORGANIZATION                                | -0.86 | 0.16 | 0 | 0 | 0 | not significant |
| 6862 | GO_POSITIVE_REGULATION_OF_RESPONSE_TO_BIOTIC_STIMULUS      | -0.86 | 0.16 | 0 | 0 | 0 | not significant |
| 6863 | LEE_LIVER_CANCER_ACOX1_UP                                  | -0.86 | 0.16 | 0 | 0 | 0 | not significant |
| 6864 | GO_PROTEIN_EXIT_FROM_ENDOPLASMIC_RETICULUM                 | -0.86 | 0.15 | 0 | 0 | 0 | not significant |
| 6865 | AMIT_SERUM_RESPONSE_120_MCF10A                             | -0.86 | 0.14 | 0 | 0 | 0 | not significant |
| 6866 | GO_REGULATION_OF_CENTROSOME_CYCLE                          | -0.86 | 0.14 | 0 | 0 | 0 | not significant |
| 6867 | GO_REGULATION_OF_RESPONSE_TO_DRUG                          | -0.86 | 0.14 | 0 | 0 | 0 | not significant |
| 6868 | MILI_PSEUDOPODIA                                           | -0.86 | 0.14 | 0 | 0 | 0 | not significant |
| 6869 | PID_FAK_PATHWAY                                            | -0.86 | 0.14 | 0 | 0 | 0 | not significant |
| 6870 | REACTOME_FOXO_MEDIATED_TRANSCRIPTION                       | -0.86 | 0.14 | 0 | 0 | 0 | not significant |
| 6871 | LIU_COMMON_CANCER_GENES                                    | -0.86 | 0.13 | 0 | 0 | 0 | not significant |
| 6872 | REACTOME_STIMULI_SENSING_CHANNELS                          | -0.86 | 0.13 | 0 | 0 | 0 | not significant |
| 6873 | GO_POSITIVE_REGULATION_OF_ORGANELLE_ASSEMBLY               | -0.86 | 0.12 | 0 | 0 | 0 | not significant |
| 6874 | REACTOME_MYD88_CASCADE_INITIATED_ON_PLASMA_MEMBRANE        | -0.86 | 0.11 | 0 | 0 | 0 | not significant |
| 6875 | GO_TUBE_FORMATION                                          | -0.86 | 0.10 | 0 | 0 | 0 | not significant |
| 6876 | MCBRYAN_PUBERTAL_TGFB1_TARGETS_UP                          | -0.86 | 0.10 | 0 | 0 | 0 | not significant |
| 6877 | GO_HORMONE_MEDIATED_SIGNALING_PATHWAY                      | -0.86 | 0.09 | 0 | 0 | 0 | not significant |
| 6878 | KAYO_AGING_MUSCLE_DN                                       | -0.86 | 0.09 | 0 | 0 | 0 | not significant |
| 6879 | MCBRYAN_PUBERTAL_BREAST_6_7WK_UP                           | -0.86 | 0.09 | 0 | 0 | 0 | not significant |
| 6880 | GO_NUCLEASE_ACTIVITY                                       | -0.86 | 0.08 | 0 | 0 | 0 | not significant |
| 6881 | GO_GLYCEROLIPID_BIOSYNTHETIC_PROCESS                       | -0.86 | 0.07 | 0 | 0 | 0 | not significant |
| 6882 | GO_NUCLEAR_CHROMATIN                                       | -0.86 | 0.04 | 0 | 0 | 0 | not significant |
| 6883 | GO_REGULATION_OF_MAPK_CASCADE                              | -0.86 | 0.04 | 0 | 0 | 0 | not significant |
| 6884 | GO_INTRAMOLECULAR_TRANSFERASE_ACTIVITY_PHOSPHOTRANSFERA    | -0.85 | 0.22 | 0 | 0 | 0 | not significant |
| 6885 | GO_IRON_ION_TRANSMEMBRANE_TRANSPORTER_ACTIVITY             | -0.85 | 0.20 | 0 | 0 | 0 | not significant |
| 6886 | GO_NEGATIVE_REGULATION_OF_CALCIIUM_IION_TRANSPORT_INT0_CYT | -0.85 | 0.20 | 0 | 0 | 0 | not significant |
| 6887 | GO_POSITIVE_REGULATION_OF_MACROPHAGE_CHEMOTAXIS            | -0.85 | 0.20 | 0 | 0 | 0 | not significant |
| 6888 | GO_REGULATION_OF_NEURONINFLAMMATORY_RESPONSE               | -0.85 | 0.20 | 0 | 0 | 0 | not significant |
| 6889 | REACTOME_NOREPINEPHRINE_NEUROTRANSMITTER_RELEASE_CYCLE     | -0.85 | 0.20 | 0 | 0 | 0 | not significant |
| 6890 | REACTOME_SYNTHESIS_OF_PPS_AT_THE_GOLGI_MEMBRANE            | -0.85 | 0.20 | 0 | 0 | 0 | not significant |
| 6891 | REACTOME_TRISTETRAPROLIN_TTP_ZFP36_BINDS_AND_DESTABILIZES  | -0.85 | 0.20 | 0 | 0 | 0 | not significant |
| 6892 | GO_3_HYDROXYACYL_COA_DEHYDROGENASE_ACTIVITY                | -0.85 | 0.19 | 0 | 0 | 0 | not significant |
| 6893 | GO_MALE_MATING_BEHAVIOR                                    | -0.85 | 0.19 | 0 | 0 | 0 | not significant |
| 6894 | GO_METANEPHRIC_NEPHRON_EPITHELIUM_DEVELOPMENT              | -0.85 | 0.19 | 0 | 0 | 0 | not significant |
| 6895 | GO_MUTLALPHA_COMPLEX_BINDING                               | -0.85 | 0.19 | 0 | 0 | 0 | not significant |
| 6896 | GO_NEGATIVE_REGULATION_OF_ANDROGEN_RECEPTOR_SIGNALING_P    | -0.85 | 0.19 | 0 | 0 | 0 | not significant |
| 6897 | GO_NEGATIVE_REGULATION_OF_CYTOSOLIC_CALCIIUM_IION_CONCENTR | -0.85 | 0.19 | 0 | 0 | 0 | not significant |
| 6898 | GO_PROTEIN_MEMBRANE_ANCHOR                                 | -0.85 | 0.19 | 0 | 0 | 0 | not significant |
| 6899 | GO_RAGULATOR_COMPLEX                                       | -0.85 | 0.19 | 0 | 0 | 0 | not significant |
| 6900 | MURAKAMI_UV_RESPONSE_1HR_DN                                | -0.85 | 0.19 | 0 | 0 | 0 | not significant |
| 6901 | REACTOME_HEME_BIOSYNTHESIS                                 | -0.85 | 0.19 | 0 | 0 | 0 | not significant |
| 6902 | GO_BETA_CATENIN_TCF_COMPLEX                                | -0.85 | 0.18 | 0 | 0 | 0 | not significant |
| 6903 | GO_CATALYTIC_STEP_1_SPLICEOSOME                            | -0.85 | 0.18 | 0 | 0 | 0 | not significant |
| 6904 | GO_DEATH_INDUCING_SIGNALING_COMPLEX                        | -0.85 | 0.18 | 0 | 0 | 0 | not significant |
| 6905 | GO_NEGATIVE_REGULATION_OF_ANOKIS                           | -0.85 | 0.18 | 0 | 0 | 0 | not significant |
| 6906 | GO_NEGATIVE_REGULATION_OF_CARDIOCYTE_DIFFERENTIATION       | -0.85 | 0.18 | 0 | 0 | 0 | not significant |
| 6907 | GO_NEGATIVE_REGULATION_OF_T_CELL_MEDIATED_IMMUNITY         | -0.85 | 0.18 | 0 | 0 | 0 | not significant |
| 6908 | GO_REGULATION_OF_THYMOCYTE_APOPTOTIC_PROCESS               | -0.85 | 0.18 | 0 | 0 | 0 | not significant |
| 6909 | REACTOME_ACTIVATION_OF_MATRIX_METALLOPROTEINASES           | -0.85 | 0.18 | 0 | 0 | 0 | not significant |
| 6910 | REACTOME_DEFECTS_IN_BIOTIN_BTIN_METABOLISM                 | -0.85 | 0.18 | 0 | 0 | 0 | not significant |
| 6911 | REACTOME_HS_GAG_BIOSYNTHESIS                               | -0.85 | 0.18 | 0 | 0 | 0 | not significant |
| 6912 | REACTOME_RAF_INDEPENDENT_MAPK1_3_ACTIVATION                | -0.85 | 0.18 | 0 | 0 | 0 | not significant |
| 6913 | SA_B_CELL_RECEPTOR_COMPLEXES                               | -0.85 | 0.18 | 0 | 0 | 0 | not significant |
| 6914 | YIH_RESPONSE_TO_ARSENITE_C2                                | -0.85 | 0.18 | 0 | 0 | 0 | not significant |
| 6915 | CUL_TCF21_TARGETS_DN                                       | -0.85 | 0.17 | 0 | 0 | 0 | not significant |
| 6916 | GO_FEAR_RESPONSE                                           | -0.85 | 0.17 | 0 | 0 | 0 | not significant |
| 6917 | GO_NEGATIVE_REGULATION_OF_JNK_CASCADE                      | -0.85 | 0.17 | 0 | 0 | 0 | not significant |
| 6918 | GO_NEURON_PROJECTION_EXTENSION_INVOLVED_IN_NEURON_PROJEC   | -0.85 | 0.17 | 0 | 0 | 0 | not significant |
| 6919 | GO_OOCYTE_MATURATION                                       | -0.85 | 0.17 | 0 | 0 | 0 | not significant |
| 6920 | GO_PROTEIN_PHOSPHATASE_TYPE_1_COMPLEX                      | -0.85 | 0.17 | 0 | 0 | 0 | not significant |
| 6921 | GO_TRANSFERRIN_TRANSPORT                                   | -0.85 | 0.17 | 0 | 0 | 0 | not significant |
| 6922 | GO_TUMOR_NECROSIS_FACTOR_RECEPTOR_BINDING                  | -0.85 | 0.17 | 0 | 0 | 0 | not significant |
| 6923 | REACTOME_AKT_PHOSPHORYLATES_TARGETS_IN_THE_NUCLEUS         | -0.85 | 0.17 | 0 | 0 | 0 | not significant |
| 6924 | GO_MODIFICATION_OF_SYNAPTIC_STRUCTURE                      | -0.85 | 0.16 | 0 | 0 | 0 | not significant |
| 6925 | GO_POSITIVE_REGULATION_OF_MITOCHONDRIAL_MEMBRANE_POTENTI   | -0.85 | 0.16 | 0 | 0 | 0 | not significant |
| 6926 | LIANG_HEMATOPOIESIS_STEM_CELL_NUMBER_SMALL_VS_HUGE_DN      | -0.85 | 0.16 | 0 | 0 | 0 | not significant |
| 6927 | PID_MYC_PATHWAY                                            | -0.85 | 0.16 | 0 | 0 | 0 | not significant |
| 6928 | REACTOME_ELEVATION_OF_CYTOSOLIC_CA2PLUS_LEVELS             | -0.85 | 0.16 | 0 | 0 | 0 | not significant |
| 6929 | GO_ATP_METABOLIC_PROCESS                                   | -0.85 | 0.15 | 0 | 0 | 0 | not significant |
| 6930 | GO_ZINC_IION_TRANSMEMBRANE_TRANSPORT                       | -0.85 | 0.15 | 0 | 0 | 0 | not significant |
| 6931 | LEE_TARGETS_OF_PTCH1_AND_SUFU_DN                           | -0.85 | 0.15 | 0 | 0 | 0 | not significant |
| 6932 | REACTOME_TRANSLESION_SYNTHESIS_BY_Y_FAMILY_DNA_POLYMERAS   | -0.85 | 0.15 | 0 | 0 | 0 | not significant |
| 6933 | GENTILE_UV_RESPONSE_CLUSTER_D8                             | -0.85 | 0.14 | 0 | 0 | 0 | not significant |
| 6934 | GO_MATERNAL_PROCESS_INVOLVED_IN_FEMALE_PREGNANCY           | -0.85 | 0.14 | 0 | 0 | 0 | not significant |
| 6935 | GO_MONOSACCHARIDE_CATABOLIC_PROCESS                        | -0.85 | 0.14 | 0 | 0 | 0 | not significant |
| 6936 | GO_MYOBLAST_DIFFERENTIATION                                | -0.85 | 0.14 | 0 | 0 | 0 | not significant |
| 6937 | GO_SMOOTH_MUSCLE_CELL_MIGRATION                            | -0.85 | 0.14 | 0 | 0 | 0 | not significant |
| 6938 | KENNY_CTNNB1_TARGETS_DN                                    | -0.85 | 0.14 | 0 | 0 | 0 | not significant |
| 6939 | MAHAJAN_RESPONSE_TO_IL1A_DN                                | -0.85 | 0.14 | 0 | 0 | 0 | not significant |
| 6940 | GO_BLASTOCYST_FORMATION                                    | -0.85 | 0.13 | 0 | 0 | 0 | not significant |
| 6941 | GO_REGULATION_OF_TORC1_SIGNALING                           | -0.85 | 0.13 | 0 | 0 | 0 | not significant |
| 6942 | GO_NEGATIVE_REGULATION_OF_IION_TRANSMEMBRANE_TRANSPORT     | -0.85 | 0.12 | 0 | 0 | 0 | not significant |
| 6943 | GO_REGULATION_OF_ACTIN_FILAMENT_BUNDLE_ASSEMBLY            | -0.85 | 0.12 | 0 | 0 | 0 | not significant |
| 6944 | GO_SWI_SNF_SUPERFAMILY_TYPE_COMPLEX                        | -0.85 | 0.12 | 0 | 0 | 0 | not significant |
| 6945 | GO_NEUTRAL_LIPID_METABOLIC_PROCESS                         | -0.85 | 0.11 | 0 | 0 | 0 | not significant |
| 6946 | GO_P53_BINDING                                             | -0.85 | 0.11 | 0 | 0 | 0 | not significant |
| 6947 | GO_CEREBRAL_CORTEX_DEVELOPMENT                             | -0.85 | 0.10 | 0 | 0 | 0 | not significant |
| 6948 | PID_HDAC_CLASSII_PATHWAY                                   | -0.85 | 0.10 | 0 | 0 | 0 | not significant |
| 6949 | GO_REGULATION_OF_EXTRINSIC_APOPTOTIC_SIGNALING_PATHWAY     | -0.85 | 0.08 | 0 | 0 | 0 | not significant |
| 6950 | GO_MICROTUBULE_BASED_MOVEMENT                              | -0.85 | 0.05 | 0 | 0 | 0 | not significant |
| 6951 | LINSLEY_MIR16_TARGETS                                      | -0.85 | 0.04 | 0 | 0 | 0 | not significant |
| 6952 | PWJANA_BRCA2_PCC_NETWORK                                   | -0.85 | 0.02 | 0 | 0 | 0 | not significant |
| 6953 | GO_REGULATION_OF_GTPASE_ACTIVITY                           | -0.85 | 0.01 | 0 | 0 | 0 | not significant |
| 6954 | GO_CELLULAR_RESPONSE_TO_DNA_DAMAGE_STIMULUS                | -0.85 | 0.00 | 0 | 0 | 0 | not significant |
| 6955 | GO_CHROMATIN                                               | -0.85 | 0.00 | 0 | 0 | 0 | not significant |
| 6956 | NADERI_BREAST_CANCER_PROGNOSIS_DN                          | -0.84 | 0.20 | 0 | 0 | 0 | not significant |
| 6957 | GO_DISTAL_TUBULE_DEVELOPMENT                               | -0.84 | 0.19 | 0 | 0 | 0 | not significant |
| 6958 | GO_ENDORIBONUCLEASE_ACTIVITY_PRODUCING_3_PHOSPHOMONOEST    | -0.84 | 0.19 | 0 | 0 | 0 | not significant |
| 6959 | GO_ER_OVERLOAD_RESPONSE                                    | -0.84 | 0.19 | 0 | 0 | 0 | not significant |
| 6960 | GO_GALACTOSE_METABOLIC_PROCESS                             | -0.84 | 0.19 | 0 | 0 | 0 | not significant |
| 6961 | GO_MACROPINOCYTOSIS                                        | -0.84 | 0.19 | 0 | 0 | 0 | not significant |
| 6962 | GO_NEGATIVE_REGULATION_OF_PRI_MIRNA_TRANSCRIPTION_BY_RNA   | -0.84 | 0.19 | 0 | 0 | 0 | not significant |
| 6963 | REACTOME_METHIONINE_SALVAGE_PATHWAY                        | -0.84 | 0.19 | 0 | 0 | 0 | not significant |
| 6964 | REACTOME_SYNTHESIS_OF_GDP_MANNOSE                          | -0.84 | 0.19 | 0 | 0 | 0 | not significant |

|      |                                                            |       |      |   |   |   |                 |
|------|------------------------------------------------------------|-------|------|---|---|---|-----------------|
| 6965 | REACTOME_SYNTHESIS_OF_PIPS_AT_THE_ER_MEMBRANE              | -0.84 | 0.19 | 0 | 0 | 0 | not significant |
| 6966 | BIOCARTA_PKC_PATHWAY                                       | -0.84 | 0.18 | 0 | 0 | 0 | not significant |
| 6967 | BRUNEAU_SEPTATION_VENTRICULAR                              | -0.84 | 0.18 | 0 | 0 | 0 | not significant |
| 6968 | GO_EXTRACELLULAR_MATRIX_ASSEMBLY                           | -0.84 | 0.18 | 0 | 0 | 0 | not significant |
| 6969 | GO_MAINTENANCE_OF_PROTEIN_LOCALIZATION_IN_ENDOPLASMIC_RET  | -0.84 | 0.18 | 0 | 0 | 0 | not significant |
| 6970 | GO_MICROTUBULE_SEVERING                                    | -0.84 | 0.18 | 0 | 0 | 0 | not significant |
| 6971 | GO_PHOSPHATIDYLGLYCEROL_BIOSYNTHETIC_PROCESS               | -0.84 | 0.18 | 0 | 0 | 0 | not significant |
| 6972 | GO_POSITIVE_REGULATION_OF_AMINO_ACID_TRANSPORT             | -0.84 | 0.18 | 0 | 0 | 0 | not significant |
| 6973 | GO_POSITIVE_REGULATION_OF_INTRACELLULAR_STEROID_HORMONE    | -0.84 | 0.18 | 0 | 0 | 0 | not significant |
| 6974 | PID_SYNDECAN_4_PATHWAY                                     | -0.84 | 0.18 | 0 | 0 | 0 | not significant |
| 6975 | REACTOME_SUMO_IS_CONJUGATED_TO_E1_UBA2:SAE1                | -0.84 | 0.18 | 0 | 0 | 0 | not significant |
| 6976 | GO_ACTIVATION_OF_MAPKKK_ACTIVITY                           | -0.84 | 0.17 | 0 | 0 | 0 | not significant |
| 6977 | GO_CILIARY_BASE                                            | -0.84 | 0.17 | 0 | 0 | 0 | not significant |
| 6978 | GO_FAT_SOLUBLE_VITAMIN_BIOSYNTHETIC_PROCESS                | -0.84 | 0.17 | 0 | 0 | 0 | not significant |
| 6979 | GO_MIDBODY_ABSCISSION                                      | -0.84 | 0.17 | 0 | 0 | 0 | not significant |
| 6980 | GO_N_TERMINAL_PROTEIN_AMINO_ACID_ACETYLATION               | -0.84 | 0.17 | 0 | 0 | 0 | not significant |
| 6981 | GO_TRANSLOCON_COMPLEX                                      | -0.84 | 0.17 | 0 | 0 | 0 | not significant |
| 6982 | HOFMANN_MYELODYSPLASTIC_SYNDROM_RISK_DN                    | -0.84 | 0.17 | 0 | 0 | 0 | not significant |
| 6983 | KIM_MYCL1_AMPLIFICATION_TARGETS_DN                         | -0.84 | 0.17 | 0 | 0 | 0 | not significant |
| 6984 | PID_NETRIN_PATHWAY                                         | -0.84 | 0.17 | 0 | 0 | 0 | not significant |
| 6985 | WIKMAN_ASBESTOS_LUNG_CANCER_DN                             | -0.84 | 0.17 | 0 | 0 | 0 | not significant |
| 6986 | GO_3_UTR_MEDIATED_MRNA_STABILIZATION                       | -0.84 | 0.16 | 0 | 0 | 0 | not significant |
| 6987 | GO_FOREBRAIN_GENERATION_OF_NEURONS                         | -0.84 | 0.16 | 0 | 0 | 0 | not significant |
| 6988 | GO_PHOSPHATIDYLINOSITOL_3_5_BISPHOSPHATE_BINDING           | -0.84 | 0.16 | 0 | 0 | 0 | not significant |
| 6989 | GO_SERINE_TYPE_ENDOPEPTIDASE_INHIBITOR_ACTIVITY            | -0.84 | 0.16 | 0 | 0 | 0 | not significant |
| 6990 | REACTOME_SIGNALING_BY_EGFRVIII_IN_CANCER                   | -0.84 | 0.16 | 0 | 0 | 0 | not significant |
| 6991 | GO_ATP_HYDROLYSIS_COUPLED_TRANSMEMBRANE_TRANSPORT          | -0.84 | 0.15 | 0 | 0 | 0 | not significant |
| 6992 | KEGG_MISMATCH_REPAIR                                       | -0.84 | 0.15 | 0 | 0 | 0 | not significant |
| 6993 | OZEN_MIR125B1_TARGETS                                      | -0.84 | 0.15 | 0 | 0 | 0 | not significant |
| 6994 | REACTOME_BBSOME_MEDIATED_CARGO_TARGETING_TO_CILIUM         | -0.84 | 0.15 | 0 | 0 | 0 | not significant |
| 6995 | CHR15Q24                                                   | -0.84 | 0.14 | 0 | 0 | 0 | not significant |
| 6996 | GO_CYCLIN_BINDING                                          | -0.84 | 0.14 | 0 | 0 | 0 | not significant |
| 6997 | GO_NEGATIVE_REGULATION_OF_CELL_MATRIX_ADHESION             | -0.84 | 0.14 | 0 | 0 | 0 | not significant |
| 6998 | LIANG_HEMATOPOIESIS_STEM_CELL_NUMBER_LARGE_VS_TINY_DN      | -0.84 | 0.14 | 0 | 0 | 0 | not significant |
| 6999 | WIEDERSCHAIN_TARGETS_OF_BMI1_AND_PCGF2                     | -0.84 | 0.14 | 0 | 0 | 0 | not significant |
| 7000 | BOYLAN_MULTIPLE_MYELOMA_C_CLUSTER_UP                       | -0.84 | 0.13 | 0 | 0 | 0 | not significant |
| 7001 | GO_INTERCELLULAR_BRIDGE                                    | -0.84 | 0.13 | 0 | 0 | 0 | not significant |
| 7002 | NIKOLSKY_BREAST_CANCER_20Q11_AMPLICON                      | -0.84 | 0.13 | 0 | 0 | 0 | not significant |
| 7003 | WOO_LIVER_CANCER_RECURRENCE_DN                             | -0.84 | 0.13 | 0 | 0 | 0 | not significant |
| 7004 | DUTTA_APOPTOSIS_VIA_NFKB                                   | -0.84 | 0.12 | 0 | 0 | 0 | not significant |
| 7005 | GO_MANGANESE_ION_BINDING                                   | -0.84 | 0.12 | 0 | 0 | 0 | not significant |
| 7006 | GO_REGULATION_OF_BMP_SIGNALING_PATHWAY                     | -0.84 | 0.12 | 0 | 0 | 0 | not significant |
| 7007 | NABA_ECM_REGULATORS                                        | -0.84 | 0.12 | 0 | 0 | 0 | not significant |
| 7008 | GO_GLAND_MORPHOGENESIS                                     | -0.84 | 0.11 | 0 | 0 | 0 | not significant |
| 7009 | GO_METENCEPHALON_DEVELOPMENT                               | -0.84 | 0.11 | 0 | 0 | 0 | not significant |
| 7010 | LE_EGR2_TARGETS_DN                                         | -0.84 | 0.11 | 0 | 0 | 0 | not significant |
| 7011 | SIG_PIP3_SIGNALING_IN_CARDIAC_MYOCYTES                     | -0.84 | 0.11 | 0 | 0 | 0 | not significant |
| 7012 | GO_HISTONE_DEACETYLASE_COMPLEX                             | -0.84 | 0.10 | 0 | 0 | 0 | not significant |
| 7013 | GO_METALLOPEPTIDASE_ACTIVITY                               | -0.84 | 0.10 | 0 | 0 | 0 | not significant |
| 7014 | GO_OXIDOREDUCTASE_ACTIVITY_ACTING_ON_PAISED_DONORS_WITH_I  | -0.84 | 0.10 | 0 | 0 | 0 | not significant |
| 7015 | GO_REGULATION_OF_DNA_BINDING                               | -0.84 | 0.08 | 0 | 0 | 0 | not significant |
| 7016 | REACTOME_G_ALPHA_Q_SIGNALING_EVENTS                        | -0.84 | 0.08 | 0 | 0 | 0 | not significant |
| 7017 | GO_CHROMATIN_ASSEMBLY                                      | -0.84 | 0.07 | 0 | 0 | 0 | not significant |
| 7018 | WAKABAYASHI_ADIPOGENESIS_PPARG_RXRA_BOUND_WITH_H4K20ME1_   | -0.84 | 0.07 | 0 | 0 | 0 | not significant |
| 7019 | REACTOME_HOMOLOG_DIRECTED_REPAIR                           | -0.84 | 0.06 | 0 | 0 | 0 | not significant |
| 7020 | GO_INTRACELLULAR_RECEPTOR_SIGNALING_PATHWAY                | -0.84 | 0.03 | 0 | 0 | 0 | not significant |
| 7021 | GO_DNA_REPAIR                                              | -0.84 | 0.01 | 0 | 0 | 0 | not significant |
| 7022 | WAKABAYASHI_ADIPOGENESIS_PPARG_BOUND_8D                    | -0.84 | 0.01 | 0 | 0 | 0 | not significant |
| 7023 | GO_PROTEIN_MODIFICATION_BY_SMALL_PROTEIN_CONJUGATION_OR_F  | -0.84 | 0.00 | 0 | 0 | 0 | not significant |
| 7024 | GO_CELLULAR_RESPONSE_TO_NITROSATIVE_STRESS                 | -0.83 | 0.19 | 0 | 0 | 0 | not significant |
| 7025 | GO_GATOR1_COMPLEX                                          | -0.83 | 0.19 | 0 | 0 | 0 | not significant |
| 7026 | GO_CELL_TRAILING_EDGE                                      | -0.83 | 0.18 | 0 | 0 | 0 | not significant |
| 7027 | GO_CELLULAR_RESPONSE_TO_ACIDIC_PH                          | -0.83 | 0.18 | 0 | 0 | 0 | not significant |
| 7028 | GO_REGULATION_OF_AMINO_ACID_TRANSMEMBRANE_TRANSPORT        | -0.83 | 0.18 | 0 | 0 | 0 | not significant |
| 7029 | GO_TRAIL_ACTIVATED_APOPTOTIC_SIGNALING_PATHWAY             | -0.83 | 0.18 | 0 | 0 | 0 | not significant |
| 7030 | PEDERSEN_METASTASIS_BY_ERBB2_ISOFORM_5                     | -0.83 | 0.18 | 0 | 0 | 0 | not significant |
| 7031 | REACTOME_TP53_REGULATES_TRANSCRIPTION_OF_DEATH_RECEPTOF    | -0.83 | 0.18 | 0 | 0 | 0 | not significant |
| 7032 | STEGMEIER_PRE-MITOTIC_CELL_CYCLE_REGULATORS                | -0.83 | 0.18 | 0 | 0 | 0 | not significant |
| 7033 | BIOCARTA_MAL_PATHWAY                                       | -0.83 | 0.17 | 0 | 0 | 0 | not significant |
| 7034 | DAZARD_UV_RESPONSE_CLUSTER_G5                              | -0.83 | 0.17 | 0 | 0 | 0 | not significant |
| 7035 | GO_EGO_COMPLEX                                             | -0.83 | 0.17 | 0 | 0 | 0 | not significant |
| 7036 | GO_NEGATIVE_REGULATION_OF_EPIDERMIS_DEVELOPMENT            | -0.83 | 0.17 | 0 | 0 | 0 | not significant |
| 7037 | GO_PPTIDYL_LYSINE_MONOMETHYLATION                          | -0.83 | 0.17 | 0 | 0 | 0 | not significant |
| 7038 | GO_PHOSPHATIDYLINOSITOL_3_KINASE_COMPLEX_CLASS_I           | -0.83 | 0.17 | 0 | 0 | 0 | not significant |
| 7039 | GO_POSITIVE_REGULATION_OF_LIPOPOLYSACCHARIDE_MEDIATED_SIGI | -0.83 | 0.17 | 0 | 0 | 0 | not significant |
| 7040 | GO_POSITIVE_REGULATION_OF_MEIOTIC_CELL_CYCLE               | -0.83 | 0.17 | 0 | 0 | 0 | not significant |
| 7041 | GO_POSITIVE_REGULATION_OF_STEM_CELL_DIFFERENTIATION        | -0.83 | 0.17 | 0 | 0 | 0 | not significant |
| 7042 | GO_REGULATION_OF_DEACETYLASE_ACTIVITY                      | -0.83 | 0.17 | 0 | 0 | 0 | not significant |
| 7043 | GO_REGULATION_OF_PROTEIN_KINASE_C_SIGNALING                | -0.83 | 0.17 | 0 | 0 | 0 | not significant |
| 7044 | GO_SEQUENCE_SPECIFIC_SINGLE_STRANDED_DNA_BINDING           | -0.83 | 0.17 | 0 | 0 | 0 | not significant |
| 7045 | PAPASPYRIDONOS_UNSTABLE_ATEROSCLEROTIC_PLAQUE_DN           | -0.83 | 0.17 | 0 | 0 | 0 | not significant |
| 7046 | REACTOME_ENDOSOMAL_VACUOLAR_PATHWAY                        | -0.83 | 0.17 | 0 | 0 | 0 | not significant |
| 7047 | REACTOME_HYALURONAN_UPTAKE_AND_DEGRADATION                 | -0.83 | 0.17 | 0 | 0 | 0 | not significant |
| 7048 | REACTOME_TP53_REGULATES_TRANSCRIPTION_OF_GENES_INVOLVED    | -0.83 | 0.17 | 0 | 0 | 0 | not significant |
| 7049 | CHR12Q15                                                   | -0.83 | 0.16 | 0 | 0 | 0 | not significant |
| 7050 | GO_ENDOPLASMIC_RETICULUM_EXIT_SITE                         | -0.83 | 0.16 | 0 | 0 | 0 | not significant |
| 7051 | GO_PTERIDINE_CONTAINING_COMPOUND_METABOLIC_PROCESS         | -0.83 | 0.16 | 0 | 0 | 0 | not significant |
| 7052 | GO_RAC_GUANYL_NUCLEOTIDE_EXCHANGE_FACTOR_ACTIVITY          | -0.83 | 0.16 | 0 | 0 | 0 | not significant |
| 7053 | GO_REGULATION_OF_CHOLESTEROL_EFFLUX                        | -0.83 | 0.16 | 0 | 0 | 0 | not significant |
| 7054 | GO_RESOLUTION_OF_MEIOTIC_RECOMBINATION_INTERMEDIATES       | -0.83 | 0.16 | 0 | 0 | 0 | not significant |
| 7055 | GO_RRNA_CATABOLIC_PROCESS                                  | -0.83 | 0.16 | 0 | 0 | 0 | not significant |
| 7056 | GO_VERY_LOW_DENSITY_LIPOPROTEIN_PARTICLE_ASSEMBLY          | -0.83 | 0.16 | 0 | 0 | 0 | not significant |
| 7057 | NAGY_TFTC_COMPONENTS_HUMAN                                 | -0.83 | 0.16 | 0 | 0 | 0 | not significant |
| 7058 | REACTOME_CYTOCHROME_C_MEDIATED_APOPTOTIC_RESPONSE          | -0.83 | 0.16 | 0 | 0 | 0 | not significant |
| 7059 | REACTOME_PROLONGED_ERK_ACTIVATION_EVENTS                   | -0.83 | 0.16 | 0 | 0 | 0 | not significant |
| 7060 | REACTOME_SEROTONIN_NEUROTRANSMITTER_RELEASE_CYCLE          | -0.83 | 0.16 | 0 | 0 | 0 | not significant |
| 7061 | FOURNIER_ACINAR_DEVELOPMENT_EARLY_UP                       | -0.83 | 0.15 | 0 | 0 | 0 | not significant |
| 7062 | GO_POSITIVE_REGULATION_OF_PROTEIN_AUTOPHOSPHORYLATION      | -0.83 | 0.15 | 0 | 0 | 0 | not significant |
| 7063 | GO_POSITIVE_REGULATION_OF_SMOOTHENED_SIGNALING_PATHWAY     | -0.83 | 0.15 | 0 | 0 | 0 | not significant |
| 7064 | GO_PURINE_NUCLEOSIDE_MONOPHOSPHATE_METABOLIC_PROCESS       | -0.83 | 0.15 | 0 | 0 | 0 | not significant |
| 7065 | GO_REGULATION_OF_EXTRACELLULAR_MATRIX_DISASSEMBLY          | -0.83 | 0.15 | 0 | 0 | 0 | not significant |
| 7066 | GO_REGULATION_OF_MYOBLAST_DIFFERENTIATION                  | -0.83 | 0.15 | 0 | 0 | 0 | not significant |
| 7067 | GO_REGULATION_OF_NEURONAL_SYNAPTIC_PLASTICITY              | -0.83 | 0.15 | 0 | 0 | 0 | not significant |
| 7068 | PLASARI_TGFB1_SIGNALING_VIA_NFIC_10HR_DN                   | -0.83 | 0.15 | 0 | 0 | 0 | not significant |
| 7069 | SIMBULAN_UV_RESPONSE_NORMAL_DN                             | -0.83 | 0.15 | 0 | 0 | 0 | not significant |
| 7070 | BIOCARTA_HSP27_PATHWAY                                     | -0.83 | 0.14 | 0 | 0 | 0 | not significant |
| 7071 | GO_HISTONE_H2A_ACETYLATION                                 | -0.83 | 0.14 | 0 | 0 | 0 | not significant |
| 7072 | GO_PRODUCTION_OF_SMALL_RNA_INVOLVED_IN_GENE_SILENCING_BY   | -0.83 | 0.14 | 0 | 0 | 0 | not significant |
| 7073 | CHR4Q31                                                    | -0.83 | 0.13 | 0 | 0 | 0 | not significant |

|      |                                                             |       |      |   |   |   |                 |
|------|-------------------------------------------------------------|-------|------|---|---|---|-----------------|
| 7074 | GO MODULATION OF TRANSCRIPTION IN OTHER ORGANISM INVOLVEI   | -0.83 | 0.13 | 0 | 0 | 0 | not significant |
| 7075 | GO_NEGATIVE_REGULATION_OF_RESPONSE_TO_CYTOKINE_STIMULUS     | -0.83 | 0.13 | 0 | 0 | 0 | not significant |
| 7076 | GO_OVULATION_CYCLE_PROCESS                                  | -0.83 | 0.13 | 0 | 0 | 0 | not significant |
| 7077 | GO_POSITIVE_REGULATION_OF_ANION_TRANSPORT                   | -0.83 | 0.13 | 0 | 0 | 0 | not significant |
| 7078 | GO_REGULATION_OF_HISTONE_H4_ACETYLATION                     | -0.83 | 0.13 | 0 | 0 | 0 | not significant |
| 7079 | PID_FOXO_PATHWAY                                            | -0.83 | 0.13 | 0 | 0 | 0 | not significant |
| 7080 | GO_PHOSPHATIDYLINOSITOL_4_5_BISPHOSPHATE_BINDING            | -0.83 | 0.12 | 0 | 0 | 0 | not significant |
| 7081 | GO_POSITIVE_REGULATION_OF_MEMBRANE_PERMEABILITY             | -0.83 | 0.12 | 0 | 0 | 0 | not significant |
| 7082 | GO_TETHERING_COMPLEX                                        | -0.83 | 0.12 | 0 | 0 | 0 | not significant |
| 7083 | PID_ERBB2_ERBB3_PATHWAY                                     | -0.83 | 0.12 | 0 | 0 | 0 | not significant |
| 7084 | GO_INTRACELLULAR_ESTROGEN_RECEPTOR_SIGNALING_PATHWAY        | -0.83 | 0.11 | 0 | 0 | 0 | not significant |
| 7085 | WENG_POR_TARGETS_LIVER_UP                                   | -0.83 | 0.11 | 0 | 0 | 0 | not significant |
| 7086 | GO_CILIARY_TRANSITION_ZONE                                  | -0.83 | 0.10 | 0 | 0 | 0 | not significant |
| 7087 | GO_EXONUCLEASE_ACTIVITY_ACTIVE_WITH_EITHER_RIBO_OR_DEOXYR   | -0.83 | 0.10 | 0 | 0 | 0 | not significant |
| 7088 | HALLMARK_ANDROGEN_RESPONSE                                  | -0.83 | 0.10 | 0 | 0 | 0 | not significant |
| 7089 | HOEBEKE_LYMPHOID_STEM_CELL_UP                               | -0.83 | 0.10 | 0 | 0 | 0 | not significant |
| 7090 | DACOSTA_UV_RESPONSE_VIA_ERCC3_XPCS_DN                       | -0.83 | 0.09 | 0 | 0 | 0 | not significant |
| 7091 | GO_MACROMOLECULE_DEACYLATION                                | -0.83 | 0.09 | 0 | 0 | 0 | not significant |
| 7092 | GO_POSITIVE_REGULATION_OF_CELL_CYCLE_PHASE_TRANSITION       | -0.83 | 0.09 | 0 | 0 | 0 | not significant |
| 7093 | IKEDA_MIR30_TARGETS_UP                                      | -0.83 | 0.08 | 0 | 0 | 0 | not significant |
| 7094 | REACTOME_SIGNALING_BY_TGF_BETA_RECEPTOR_COMPLEX             | -0.83 | 0.08 | 0 | 0 | 0 | not significant |
| 7095 | GO_TRANSITION_METAL_ION_TRANSPORT                           | -0.83 | 0.07 | 0 | 0 | 0 | not significant |
| 7096 | GO_UBIQUITIN_LIKE_PROTEIN_SPECIFIC_PROTEASE_ACTIVITY        | -0.83 | 0.07 | 0 | 0 | 0 | not significant |
| 7097 | GO_CHROMATIN_ASSEMBLY_OR_DISASSEMBLY                        | -0.83 | 0.06 | 0 | 0 | 0 | not significant |
| 7098 | GO_REGULATION_OF_UBIQUITIN_DEPENDENT_PROTEIN_CATABOLIC_PR   | -0.83 | 0.06 | 0 | 0 | 0 | not significant |
| 7099 | BENPORATH_OCT4_TARGETS                                      | -0.83 | 0.04 | 0 | 0 | 0 | not significant |
| 7100 | CHR12Q24                                                    | -0.83 | 0.03 | 0 | 0 | 0 | not significant |
| 7101 | GO_ALDEHYDE_CATABOLIC_PROCESS                               | -0.82 | 0.18 | 0 | 0 | 0 | not significant |
| 7102 | GO_PARASPECKLES                                             | -0.82 | 0.18 | 0 | 0 | 0 | not significant |
| 7103 | GO_PROGRAMMED_CELL_DEATH_IN_RESPONSE_TO_REACTIVE_OXYGE      | -0.82 | 0.18 | 0 | 0 | 0 | not significant |
| 7104 | CHR16Q11                                                    | -0.82 | 0.17 | 0 | 0 | 0 | not significant |
| 7105 | GO_MEMBRANOUS_SEPTUM_MORPHOGENESIS                          | -0.82 | 0.17 | 0 | 0 | 0 | not significant |
| 7106 | GO_NEGATIVE_REGULATION_OF_VASCULAR_ENDOTHELIAL_GROWTH_F     | -0.82 | 0.17 | 0 | 0 | 0 | not significant |
| 7107 | GO_SPERM_CAPACITATION                                       | -0.82 | 0.17 | 0 | 0 | 0 | not significant |
| 7108 | HINATA_NFKB_TARGETS_KERATINOCYTE_DN                         | -0.82 | 0.17 | 0 | 0 | 0 | not significant |
| 7109 | GO_ACTIVATION_OF_CYSSTEINE_TYPE_ENDOPEPTIDASE_ACTIVITY      | -0.82 | 0.16 | 0 | 0 | 0 | not significant |
| 7110 | GO_HYALURONAN_CATABOLIC_PROCESS                             | -0.82 | 0.16 | 0 | 0 | 0 | not significant |
| 7111 | GO_INNER_CELL_MASS_CELL_PROLIFERATION                       | -0.82 | 0.16 | 0 | 0 | 0 | not significant |
| 7112 | GO_MEMBRANE_REPOLARIZATION_DURING_ACTION_POTENTIAL          | -0.82 | 0.16 | 0 | 0 | 0 | not significant |
| 7113 | GO_MITOTIC_CELL_CYCLE_ARREST                                | -0.82 | 0.16 | 0 | 0 | 0 | not significant |
| 7114 | GO_NEGATIVE_REGULATION_OF_INTRINSIC_APOPTOTIC_SIGNALING_PA  | -0.82 | 0.16 | 0 | 0 | 0 | not significant |
| 7115 | GO_PARTURITION                                              | -0.82 | 0.16 | 0 | 0 | 0 | not significant |
| 7116 | GO_PHOSPHORYLASE_ACTIVITY                                   | -0.82 | 0.16 | 0 | 0 | 0 | not significant |
| 7117 | GO_REGULATION_OF_AMINO_ACID_IMPORT_ACROSS_PLASMA_MEMBRA     | -0.82 | 0.16 | 0 | 0 | 0 | not significant |
| 7118 | GO_REGULATION_OF_RETINOIC_ACID_RECEPTOR_SIGNALING_PATHWA    | -0.82 | 0.16 | 0 | 0 | 0 | not significant |
| 7119 | GO_RESPONSE_TO_FOLLICLE_STIMULATING_HORMONE                 | -0.82 | 0.16 | 0 | 0 | 0 | not significant |
| 7120 | GO_TRANSCRIPTION_INITIATION_FROM_RNA_POLYMERASE_III_PROMOTI | -0.82 | 0.16 | 0 | 0 | 0 | not significant |
| 7121 | GO_TYPE_I_INTERFERON_SECRETION                              | -0.82 | 0.16 | 0 | 0 | 0 | not significant |
| 7122 | GO_WALKING_BEHAVIOR                                         | -0.82 | 0.16 | 0 | 0 | 0 | not significant |
| 7123 | LI_CYTIDINE_ANALOGS_CYCOTOXICITY                            | -0.82 | 0.16 | 0 | 0 | 0 | not significant |
| 7124 | LUND_SILENCED_BY_METHYLATION                                | -0.82 | 0.16 | 0 | 0 | 0 | not significant |
| 7125 | REACTOME_BETA_OXIDATION_OF_DECANOYL_COA_TO_OCTANOYL_CC      | -0.82 | 0.16 | 0 | 0 | 0 | not significant |
| 7126 | SA_FAS_SIGNALING                                            | -0.82 | 0.16 | 0 | 0 | 0 | not significant |
| 7127 | BIOCARTA_SPPA_PATHWAY                                       | -0.82 | 0.15 | 0 | 0 | 0 | not significant |
| 7128 | GO_ANDROGEN_METABOLIC_PROCESS                               | -0.82 | 0.15 | 0 | 0 | 0 | not significant |
| 7129 | GO_APOLIPOPROTEIN_BINDING                                   | -0.82 | 0.15 | 0 | 0 | 0 | not significant |
| 7130 | GO_CELLULAR_RESPONSE_TO_FOLLICLE_STIMULATING_HORMONE_STI    | -0.82 | 0.15 | 0 | 0 | 0 | not significant |
| 7131 | GO_CELLULAR_RESPONSE_TO_LIPOPROTEIN_PARTICLE_STIMULUS       | -0.82 | 0.15 | 0 | 0 | 0 | not significant |
| 7132 | GO_LATERAL_VENTRICLE_DEVELOPMENT                            | -0.82 | 0.15 | 0 | 0 | 0 | not significant |
| 7133 | GO_PHOSPHATIDYLINOSITOL_3_5_BISPHOSPHATE_3_PHOSPHATASE_AC   | -0.82 | 0.15 | 0 | 0 | 0 | not significant |
| 7134 | GO_POSTSYNAPTIC_ENDOCYTIC_ZONE                              | -0.82 | 0.15 | 0 | 0 | 0 | not significant |
| 7135 | REACTOME_SYNTHESIS_OF_PA                                    | -0.82 | 0.15 | 0 | 0 | 0 | not significant |
| 7136 | RICKMAN_HEAD_AND_NECK_CANCER_B                              | -0.82 | 0.15 | 0 | 0 | 0 | not significant |
| 7137 | BIOCARTA_HSWI_SNF_PATHWAY                                   | -0.82 | 0.14 | 0 | 0 | 0 | not significant |
| 7138 | CHARAFE_BREAST_CANCER_BASAL_VS_MESENCHYMAL_DN               | -0.82 | 0.14 | 0 | 0 | 0 | not significant |
| 7139 | GO_BILE_ACID_METABOLIC_PROCESS                              | -0.82 | 0.14 | 0 | 0 | 0 | not significant |
| 7140 | GO_CORTICOSTEROID_RECEPTOR_SIGNALING_PATHWAY                | -0.82 | 0.14 | 0 | 0 | 0 | not significant |
| 7141 | GO_ERROR_FREE_TRANSLESION_SYNTHESIS                         | -0.82 | 0.14 | 0 | 0 | 0 | not significant |
| 7142 | GO_HEXOSE_CATABOLIC_PROCESS                                 | -0.82 | 0.14 | 0 | 0 | 0 | not significant |
| 7143 | GO_ISOCITRATE_METABOLIC_PROCESS                             | -0.82 | 0.14 | 0 | 0 | 0 | not significant |
| 7144 | GO_PURINE_NUCLEOTIDE_TRANSPORT                              | -0.82 | 0.14 | 0 | 0 | 0 | not significant |
| 7145 | GO_REGULATION_OF_PROTEIN_TARGETING_TO_MEMBRANE              | -0.82 | 0.14 | 0 | 0 | 0 | not significant |
| 7146 | HOLLEMAN_PREDNISOLONE_RESISTANCE_B_ALL_UP                   | -0.82 | 0.14 | 0 | 0 | 0 | not significant |
| 7147 | MURAKAMI_UV_RESPONSE_6HR_UP                                 | -0.82 | 0.14 | 0 | 0 | 0 | not significant |
| 7148 | PARK_HSC_MARKERS                                            | -0.82 | 0.14 | 0 | 0 | 0 | not significant |
| 7149 | REACTOME_GAMMA_CARBOXYLATION_HYPUSINE_FORMATION_AND_AR'     | -0.82 | 0.14 | 0 | 0 | 0 | not significant |
| 7150 | CHR12P11                                                    | -0.82 | 0.13 | 0 | 0 | 0 | not significant |
| 7151 | GO_AXONAL_TRANSPORT                                         | -0.82 | 0.13 | 0 | 0 | 0 | not significant |
| 7152 | GO_REGULATION_OF_MYELOID_LEUKOCYTE_MEDIATED_IMMUNITY        | -0.82 | 0.13 | 0 | 0 | 0 | not significant |
| 7153 | HOLLERN_MICROACINAR_BREAST_TUMOR_UP                         | -0.82 | 0.13 | 0 | 0 | 0 | not significant |
| 7154 | PID_AVB3_OPN_PATHWAY                                        | -0.82 | 0.13 | 0 | 0 | 0 | not significant |
| 7155 | GO_INTRA_GOLGI_VESICLE_MEDIATED_TRANSPORT                   | -0.82 | 0.12 | 0 | 0 | 0 | not significant |
| 7156 | GO_REGULATION_OF_LIPID_KINASE_ACTIVITY                      | -0.82 | 0.12 | 0 | 0 | 0 | not significant |
| 7157 | GO_RNA_PHOSPHODIESTER_BOND_HYDROLYSIS_EXONUCLEOLYTIC        | -0.82 | 0.12 | 0 | 0 | 0 | not significant |
| 7158 | YAO_TEMPORAL_RESPONSE_TO_PROGESTERONE_CLUSTER_9             | -0.82 | 0.11 | 0 | 0 | 0 | not significant |
| 7159 | CHR16P12                                                    | -0.82 | 0.10 | 0 | 0 | 0 | not significant |
| 7160 | GO_H4_HISTONE_ACETYLTRANSFERASE_COMPLEX                     | -0.82 | 0.10 | 0 | 0 | 0 | not significant |
| 7161 | GO_L_ALPHA_AMINO_ACID_TRANSMEMBRANE_TRANSPORT               | -0.82 | 0.10 | 0 | 0 | 0 | not significant |
| 7162 | GO_LIPID_STORAGE                                            | -0.82 | 0.10 | 0 | 0 | 0 | not significant |
| 7163 | GO_NUCLEAR_REPLICATION_FORK                                 | -0.82 | 0.10 | 0 | 0 | 0 | not significant |
| 7164 | GO_PHOSPHATASE_REGULATOR_ACTIVITY                           | -0.82 | 0.10 | 0 | 0 | 0 | not significant |
| 7165 | SWEET_KRAS_TARGETS_UP                                       | -0.82 | 0.10 | 0 | 0 | 0 | not significant |
| 7166 | CHRXQ28                                                     | -0.82 | 0.09 | 0 | 0 | 0 | not significant |
| 7167 | GO_NEGATIVE_REGULATION_OF_EXTRINSIC_APOPTOTIC_SIGNALING_PA  | -0.82 | 0.09 | 0 | 0 | 0 | not significant |
| 7168 | GO_NEGATIVE_REGULATION_OF_NF_KAPPAB_TRANSCRIPTION_FACTOF    | -0.82 | 0.09 | 0 | 0 | 0 | not significant |
| 7169 | RELA_DN.V1_UP                                               | -0.82 | 0.08 | 0 | 0 | 0 | not significant |
| 7170 | BROWNE_HCMV_INFECTION_12HR_DN                               | -0.82 | 0.07 | 0 | 0 | 0 | not significant |
| 7171 | GO_REGULATION_OF_MUSCLE_ORGAN_DEVELOPMENT                   | -0.82 | 0.07 | 0 | 0 | 0 | not significant |
| 7172 | PDGF_ERK_DN.V1_UP                                           | -0.82 | 0.06 | 0 | 0 | 0 | not significant |
| 7173 | RAY_TUMORIGENESIS_BY_ERBB2_CDC25A_DN                        | -0.82 | 0.03 | 0 | 0 | 0 | not significant |
| 7174 | DAVICIONI_MOLECULAR_ARM5_VS_ERMS_UP                         | -0.82 | 0.02 | 0 | 0 | 0 | not significant |
| 7175 | GO_TRANSFERASE_COMPLEX                                      | -0.82 | 0.00 | 0 | 0 | 0 | not significant |
| 7176 | GO_PROTEIN_PHOSPHATASE_2B_BINDING                           | -0.81 | 0.18 | 0 | 0 | 0 | not significant |
| 7177 | GO_CELLULAR_RESPONSE_TO_ESTROGEN_STIMULUS                   | -0.81 | 0.17 | 0 | 0 | 0 | not significant |
| 7178 | REACTOME_GALACTOSE_CATABOLISM                               | -0.81 | 0.17 | 0 | 0 | 0 | not significant |
| 7179 | BOYALUT_LIVER_CANCER_SUBCLASS_G56_DN                        | -0.81 | 0.16 | 0 | 0 | 0 | not significant |
| 7180 | GO_ACTIN_POLYMERIZATION_DEPENDENT_CELL_MOTILITY             | -0.81 | 0.16 | 0 | 0 | 0 | not significant |
| 7181 | GO_CONNECTIVE_TISSUE_REPLACEMENT                            | -0.81 | 0.16 | 0 | 0 | 0 | not significant |
| 7182 | GO_FILOPODIUM_TIP                                           | -0.81 | 0.16 | 0 | 0 | 0 | not significant |

|      |                                                            |       |      |   |   |   |                 |
|------|------------------------------------------------------------|-------|------|---|---|---|-----------------|
| 7183 | GO_VESICLE_FUSION_WITH_GOLGI_APPARATUS                     | -0.81 | 0.16 | 0 | 0 | 0 | not significant |
| 7184 | YEMELYANOV_GR_TARGETS_DN                                   | -0.81 | 0.16 | 0 | 0 | 0 | not significant |
| 7185 | BONOME_OVARIAN_CANCER_POOR_SURVIVAL_DN                     | -0.81 | 0.15 | 0 | 0 | 0 | not significant |
| 7186 | GHANDHI_BYSTANDER_IRRADIATION_DN                           | -0.81 | 0.15 | 0 | 0 | 0 | not significant |
| 7187 | GO_CARBOXY_TERMINAL_DOMAIN_PROTEIN_KINASE_COMPLEX          | -0.81 | 0.15 | 0 | 0 | 0 | not significant |
| 7188 | GO_CELLULAR_RESPONSE_TO_NITRIC_OXIDE                       | -0.81 | 0.15 | 0 | 0 | 0 | not significant |
| 7189 | GO_INTESTINAL_EPITHELIAL_CELL_DIFFERENTIATION              | -0.81 | 0.15 | 0 | 0 | 0 | not significant |
| 7190 | GO_NADP_METABOLIC_PROCESS                                  | -0.81 | 0.15 | 0 | 0 | 0 | not significant |
| 7191 | GO_PIGMENT_GRANULE_MATURATION                              | -0.81 | 0.15 | 0 | 0 | 0 | not significant |
| 7192 | GO_PURINE_NUCLEOTIDE_TRANSMEMBRANE_TRANSPORTER_ACTIVITY    | -0.81 | 0.15 | 0 | 0 | 0 | not significant |
| 7193 | REACTOME_GLYCOGEN_BREAKDOWN_GLYCOGENOLYSIS                 | -0.81 | 0.15 | 0 | 0 | 0 | not significant |
| 7194 | REACTOME_MISCELLANEOUS_SUBSTRATES                          | -0.81 | 0.15 | 0 | 0 | 0 | not significant |
| 7195 | VERNOCHET_ADIPOGENESIS                                     | -0.81 | 0.15 | 0 | 0 | 0 | not significant |
| 7196 | BIOCARTA_EPH44_PATHWAY                                     | -0.81 | 0.14 | 0 | 0 | 0 | not significant |
| 7197 | CHANG_POUSF1_TARGETS_UP                                    | -0.81 | 0.14 | 0 | 0 | 0 | not significant |
| 7198 | CHR5Q23                                                    | -0.81 | 0.14 | 0 | 0 | 0 | not significant |
| 7199 | GO_GUANYL_NUCLEOTIDE_EXCHANGE_FACTOR_COMPLEX               | -0.81 | 0.14 | 0 | 0 | 0 | not significant |
| 7200 | PID_SMAD2_3PATHWAY                                         | -0.81 | 0.14 | 0 | 0 | 0 | not significant |
| 7201 | REACTOME_NEF_AND_SIGNAL_TRANSDUCTION                       | -0.81 | 0.14 | 0 | 0 | 0 | not significant |
| 7202 | XU_AKT1_TARGETS_48HR                                       | -0.81 | 0.14 | 0 | 0 | 0 | not significant |
| 7203 | GO_AU_RICH_ELEMENT_BINDING                                 | -0.81 | 0.13 | 0 | 0 | 0 | not significant |
| 7204 | GO_CARBOXY_TERMINAL_DOMAIN_PROTEIN_KINASE_COMPLEX          | -0.81 | 0.13 | 0 | 0 | 0 | not significant |
| 7205 | GO_POSITIVE_REGULATION_OF_LAMELLIPODIUM_ASSEMBLY           | -0.81 | 0.13 | 0 | 0 | 0 | not significant |
| 7206 | GO_POSITIVE_REGULATION_OF_REGULATED_SECRETORY_PATHWAY      | -0.81 | 0.13 | 0 | 0 | 0 | not significant |
| 7207 | GUENTHER_GROWTH_SPHERICAL_VS_ADHERENT_DN                   | -0.81 | 0.13 | 0 | 0 | 0 | not significant |
| 7208 | REACTOME_TRANSLESION_SYNTHESIS_BY_POLH                     | -0.81 | 0.13 | 0 | 0 | 0 | not significant |
| 7209 | GO_EXIT_FROM_MITOSIS                                       | -0.81 | 0.12 | 0 | 0 | 0 | not significant |
| 7210 | REACTOME_LYSOSOME_VESICLE_BIOGENESIS                       | -0.81 | 0.12 | 0 | 0 | 0 | not significant |
| 7211 | BREDEMEYER_RAG_SIGNALING_NOT_VIA_ATM_DN                    | -0.81 | 0.10 | 0 | 0 | 0 | not significant |
| 7212 | GO_BONE_REMODELING                                         | -0.81 | 0.10 | 0 | 0 | 0 | not significant |
| 7213 | GO_CELLULAR_PIGMENTATION                                   | -0.81 | 0.10 | 0 | 0 | 0 | not significant |
| 7214 | GO_NEGATIVE_REGULATION_OF_DEVELOPMENTAL_GROWTH             | -0.81 | 0.10 | 0 | 0 | 0 | not significant |
| 7215 | GO_OXIDOREDUCTASE_ACTIVITY_ACTING_ON_THE_CH_CH_GROUP_OF    | -0.81 | 0.10 | 0 | 0 | 0 | not significant |
| 7216 | GO_PYRIMIDINE_CONTAINING_COMPOUND_BIOSYNTHETIC_PROCESS     | -0.81 | 0.10 | 0 | 0 | 0 | not significant |
| 7217 | MAHAJAN_RESPONSE_TO_IL1A_UP                                | -0.81 | 0.10 | 0 | 0 | 0 | not significant |
| 7218 | REACTOME_PKMTS_METHYLATE_HISTONE_LYSINES                   | -0.81 | 0.10 | 0 | 0 | 0 | not significant |
| 7219 | KEGG_GLYCEROPHOSPHOLIPID_METABOLISM                        | -0.81 | 0.09 | 0 | 0 | 0 | not significant |
| 7220 | REACTOME_TRANSPORT_OF_BILE_SALTS_AND_ORGANIC_ACIDS_META    | -0.81 | 0.09 | 0 | 0 | 0 | not significant |
| 7221 | GO_DEVELOPMENT_OF_PRIMARY_FEMALE_SEXUAL_CHARACTERISTICS    | -0.81 | 0.08 | 0 | 0 | 0 | not significant |
| 7222 | KEGG_AXON_GUIDANCE                                         | -0.81 | 0.07 | 0 | 0 | 0 | not significant |
| 7223 | REACTOME_ION_CHANNEL_TRANSPORT                             | -0.81 | 0.05 | 0 | 0 | 0 | not significant |
| 7224 | GO_CALMODULIN_BINDING                                      | -0.81 | 0.04 | 0 | 0 | 0 | not significant |
| 7225 | GO_RESPONSE_TO_ENDOPLASMIC_RETICULUM_STRESS                | -0.81 | 0.02 | 0 | 0 | 0 | not significant |
| 7226 | GO_STRESS_ACTIVATED_PROTEIN_KINASE_SIGNALING_CASCADE       | -0.81 | 0.02 | 0 | 0 | 0 | not significant |
| 7227 | GO_NUCLEAR_MEMBRANE                                        | -0.81 | 0.01 | 0 | 0 | 0 | not significant |
| 7228 | GO_PHOSPHOLIPID_BIOSYNTHETIC_PROCESS                       | -0.81 | 0.01 | 0 | 0 | 0 | not significant |
| 7229 | GO_ENDOMEMBRANE_SYSTEM_ORGANIZATION                        | -0.81 | 0.00 | 0 | 0 | 0 | not significant |
| 7230 | GO_PEPTIDYL_AMINO_ACID_MODIFICATION                        | -0.81 | 0.00 | 0 | 0 | 0 | not significant |
| 7231 | GO_GDP_METABOLIC_PROCESS                                   | -0.80 | 0.17 | 0 | 0 | 0 | not significant |
| 7232 | GO_POSITIVE_REGULATION_OF_DNA_CATABOLIC_PROCESS            | -0.80 | 0.17 | 0 | 0 | 0 | not significant |
| 7233 | GO_SUPERCOILED_DNA_BINDING                                 | -0.80 | 0.17 | 0 | 0 | 0 | not significant |
| 7234 | GO_HISTONE_THREONINE_PHOSPHORYLATION                       | -0.80 | 0.16 | 0 | 0 | 0 | not significant |
| 7235 | GO_N_ACETYLGALUCOSAMINE_METABOLIC_PROCESS                  | -0.80 | 0.16 | 0 | 0 | 0 | not significant |
| 7236 | GO_NEGATIVE_REGULATION_OF_ASTROCYTE_DIFFERENTIATION        | -0.80 | 0.16 | 0 | 0 | 0 | not significant |
| 7237 | GO_CELL_AGGREGATION                                        | -0.80 | 0.15 | 0 | 0 | 0 | not significant |
| 7238 | GO_CELLULAR_RESPONSE_TO_LEPTIN_STIMULUS                    | -0.80 | 0.15 | 0 | 0 | 0 | not significant |
| 7239 | GO_ESTABLISHMENT_OF_VIRAL_LATENCY                          | -0.80 | 0.15 | 0 | 0 | 0 | not significant |
| 7240 | GO_LONG_CHAIN_FATTY_ACID_BIOSYNTHETIC_PROCESS              | -0.80 | 0.15 | 0 | 0 | 0 | not significant |
| 7241 | GO_MORPHOGENESIS_OF_AN_ENDOTHELIUM                         | -0.80 | 0.15 | 0 | 0 | 0 | not significant |
| 7242 | GO_PIGMENT_ACCUMULATION                                    | -0.80 | 0.15 | 0 | 0 | 0 | not significant |
| 7243 | GO_REGULATION_OF_LYSOSOMAL_LUMEN_PH                        | -0.80 | 0.15 | 0 | 0 | 0 | not significant |
| 7244 | GO_TRAPP_COMPLEX                                           | -0.80 | 0.15 | 0 | 0 | 0 | not significant |
| 7245 | MUNSHI_MULTIPLE_MYELOMA_DN                                 | -0.80 | 0.15 | 0 | 0 | 0 | not significant |
| 7246 | REACTOME_E2F_ENABLED_INHIBITION_OF_PRE_REPLICATION_COMPLEX | -0.80 | 0.15 | 0 | 0 | 0 | not significant |
| 7247 | REACTOME_SYNTHESIS_OF_DIPHTHAMIDE_EEF2                     | -0.80 | 0.15 | 0 | 0 | 0 | not significant |
| 7248 | GO_CELLULAR_RESPONSE_TO_INCREASED_OXYGEN_LEVELS            | -0.80 | 0.14 | 0 | 0 | 0 | not significant |
| 7249 | GO_HISTONE_THREONINE_KINASE_ACTIVITY                       | -0.80 | 0.14 | 0 | 0 | 0 | not significant |
| 7250 | GO_METALLOAMINOPEPTIDASE_ACTIVITY                          | -0.80 | 0.14 | 0 | 0 | 0 | not significant |
| 7251 | GO_PYRUVATE_DEHYDROGENASE_COMPLEX                          | -0.80 | 0.14 | 0 | 0 | 0 | not significant |
| 7252 | MIKKELSEN_ES_HCP_WITH_H3_UNMETHYLATED                      | -0.80 | 0.14 | 0 | 0 | 0 | not significant |
| 7253 | REACTOME_RHO_GTPASES_ACTIVATE_PAKS                         | -0.80 | 0.14 | 0 | 0 | 0 | not significant |
| 7254 | GO_DNA_DAMAGE_RESPONSE_SIGNAL_TRANSDUCTION_RESULTING_IN    | -0.80 | 0.13 | 0 | 0 | 0 | not significant |
| 7255 | GO_POSITIVE_REGULATION_OF_VASCULAR_SMOOTH_MUSCLE_CELL_PI   | -0.80 | 0.13 | 0 | 0 | 0 | not significant |
| 7256 | GO_SIN3_TYPE_COMPLEX                                       | -0.80 | 0.13 | 0 | 0 | 0 | not significant |
| 7257 | GO_STABILIZATION_OF_MEMBRANE_POTENTIAL                     | -0.80 | 0.13 | 0 | 0 | 0 | not significant |
| 7258 | HOEGERKORP_CD44_TARGETS_DIRECT_DN                          | -0.80 | 0.13 | 0 | 0 | 0 | not significant |
| 7259 | KORKOLA_CORRELATED_WITH_POU5F1                             | -0.80 | 0.13 | 0 | 0 | 0 | not significant |
| 7260 | BIOCARTA_CARM_ER_PATHWAY                                   | -0.80 | 0.12 | 0 | 0 | 0 | not significant |
| 7261 | GO_PHOSPHATASE_INHIBITOR_ACTIVITY                          | -0.80 | 0.12 | 0 | 0 | 0 | not significant |
| 7262 | GO_REGULATION_OF_CARDIOCYTE_DIFFERENTIATION                | -0.80 | 0.12 | 0 | 0 | 0 | not significant |
| 7263 | GO_REGULATION_OF_PROTEIN_SUMOYLATION                       | -0.80 | 0.12 | 0 | 0 | 0 | not significant |
| 7264 | REACTOME_GLYCOGEN_METABOLISM                               | -0.80 | 0.12 | 0 | 0 | 0 | not significant |
| 7265 | REACTOME_METALLOPROTEASE_DUBS                              | -0.80 | 0.12 | 0 | 0 | 0 | not significant |
| 7266 | GO_MACROPHAGE_MIGRATION                                    | -0.80 | 0.11 | 0 | 0 | 0 | not significant |
| 7267 | GO_NEGATIVE_REGULATION_OF_NOTCH_SIGNALING_PATHWAY          | -0.80 | 0.11 | 0 | 0 | 0 | not significant |
| 7268 | GO_REGULATION_OF_CARDIAC_MUSCLE_CELL_DIFFERENTIATION       | -0.80 | 0.11 | 0 | 0 | 0 | not significant |
| 7269 | GO_CARDIAC_SEPTUM_MORPHOGENESIS                            | -0.80 | 0.10 | 0 | 0 | 0 | not significant |
| 7270 | GO_CRANIAL_SKELETAL_SYSTEM_DEVELOPMENT                     | -0.80 | 0.10 | 0 | 0 | 0 | not significant |
| 7271 | GO_INTRACILIARY_TRANSPORT_INVOLVED_IN_CILIUM_ASSEMBLY      | -0.80 | 0.10 | 0 | 0 | 0 | not significant |
| 7272 | GOLUB_ALL_VS_AML_UP                                        | -0.80 | 0.10 | 0 | 0 | 0 | not significant |
| 7273 | GO_PLASMA_MEMBRANE_RAFT                                    | -0.80 | 0.09 | 0 | 0 | 0 | not significant |
| 7274 | GO_SIGNALING_ADAPTOR_ACTIVITY                              | -0.80 | 0.09 | 0 | 0 | 0 | not significant |
| 7275 | PID_S1P_S1P3_PATHWAY                                       | -0.80 | 0.09 | 0 | 0 | 0 | not significant |
| 7276 | REACTOME_IRON_UPTAKE_AND_TRANSPORT                         | -0.80 | 0.09 | 0 | 0 | 0 | not significant |
| 7277 | HOSHIDA_LIVER_CANCER_LATE_RECURRENCE_DN                    | -0.80 | 0.08 | 0 | 0 | 0 | not significant |
| 7278 | KYNG_DNA_DAMAGE_BY_4NQO_OR_UV                              | -0.80 | 0.08 | 0 | 0 | 0 | not significant |
| 7279 | GO_INCLUSION_BODY                                          | -0.80 | 0.07 | 0 | 0 | 0 | not significant |
| 7280 | GO_NUCLEOSIDE_TRIPHOSPHATE_METABOLIC_PROCESS               | -0.80 | 0.07 | 0 | 0 | 0 | not significant |
| 7281 | GO_REGULATION_OF_INTRACELLULAR_STEROID_HORMONE_RECEPTOR    | -0.80 | 0.07 | 0 | 0 | 0 | not significant |
| 7282 | GO_TETRAPYRROLE_BINDING                                    | -0.80 | 0.07 | 0 | 0 | 0 | not significant |
| 7283 | CHEN_HOXA5_TARGETS_9HR_UP                                  | -0.80 | 0.02 | 0 | 0 | 0 | not significant |
| 7284 | GO_REGULATION_OF_MACROAUTOPHAGY                            | -0.80 | 0.02 | 0 | 0 | 0 | not significant |
| 7285 | PASQUALUCCI_LYMPHOMA_BY_GC_STAGE_UP                        | -0.80 | 0.02 | 0 | 0 | 0 | not significant |
| 7286 | GO_NUCLEAR_SPECK                                           | -0.80 | 0.01 | 0 | 0 | 0 | not significant |
| 7287 | GO_TRANSCRIPTION_FACTOR_COMPLEX                            | -0.80 | 0.01 | 0 | 0 | 0 | not significant |
| 7288 | GO_ENDOSOMAL_PART                                          | -0.80 | 0.00 | 0 | 0 | 0 | not significant |
| 7289 | GO_G_PROTEIN_COUPLED_RECEPTOR_SIGNALING_PATHWAY_INVOLVEI   | -0.79 | 0.16 | 0 | 0 | 0 | not significant |
| 7290 | GO_NEGATIVE_REGULATION_OF_HORMONE_METABOLIC_PROCESS        | -0.79 | 0.16 | 0 | 0 | 0 | not significant |
| 7291 | GO_AMINO_ACID_BETAINE_METABOLIC_PROCESS                    | -0.79 | 0.15 | 0 | 0 | 0 | not significant |

|      |                                                             |       |      |   |   |   |                 |
|------|-------------------------------------------------------------|-------|------|---|---|---|-----------------|
| 7292 | GO_ATP_TRANSPORT                                            | -0.79 | 0.15 | 0 | 0 | 0 | not significant |
| 7293 | GO_GLYOXALATE_METABOLIC_PROCESS                             | -0.79 | 0.15 | 0 | 0 | 0 | not significant |
| 7294 | GO_MEIOTIC_CHROMOSOME_SEPARATION                            | -0.79 | 0.15 | 0 | 0 | 0 | not significant |
| 7295 | REACTOME_ADVANCED_GLYCOSYLATION_ENDPRODUCT_RECEPTOR_S       | -0.79 | 0.15 | 0 | 0 | 0 | not significant |
| 7296 | BIOCARTA_IRES_PATHWAY                                       | -0.79 | 0.14 | 0 | 0 | 0 | not significant |
| 7297 | BIOCARTA_SUMO_PATHWAY                                       | -0.79 | 0.14 | 0 | 0 | 0 | not significant |
| 7298 | GO_CELLULAR_HYPEROSMOTIC_RESPONSE                           | -0.79 | 0.14 | 0 | 0 | 0 | not significant |
| 7299 | GO_EMBRYONIC_NEUROCRANIUM_MORPHOGENESIS                     | -0.79 | 0.14 | 0 | 0 | 0 | not significant |
| 7300 | GO_ENDOPLASMIC_RETICULUM_PALMITOYLTRANSFERASE_COMPLEX       | -0.79 | 0.14 | 0 | 0 | 0 | not significant |
| 7301 | GO_MRNA_METHYLTRANSFERASE_ACTIVITY                          | -0.79 | 0.14 | 0 | 0 | 0 | not significant |
| 7302 | GO_MYOSIN_II_BINDING                                        | -0.79 | 0.14 | 0 | 0 | 0 | not significant |
| 7303 | GO_NEGATIVE_REGULATION_OF_CELL_MIGRATION_INVOLVED_IN_SPRO   | -0.79 | 0.14 | 0 | 0 | 0 | not significant |
| 7304 | GO_NEGATIVE_REGULATION_OF_ENDOTHELIAL_CELL_PROLIFERATION    | -0.79 | 0.14 | 0 | 0 | 0 | not significant |
| 7305 | GO_NUCLEOSIDE_DIPHOSPHATASE_ACTIVITY                        | -0.79 | 0.14 | 0 | 0 | 0 | not significant |
| 7306 | GO_PHOSPHATIDYLCHOLINE_ACYL_CHAIN_REMODELING                | -0.79 | 0.14 | 0 | 0 | 0 | not significant |
| 7307 | GO_SYNAPTIC_VESICLE_MATURATION                              | -0.79 | 0.14 | 0 | 0 | 0 | not significant |
| 7308 | NIKOLSKY_BREAST_CANCER_17P11_AMPLICON                       | -0.79 | 0.14 | 0 | 0 | 0 | not significant |
| 7309 | BIOCARTA_IGF1R_PATHWAY                                      | -0.79 | 0.13 | 0 | 0 | 0 | not significant |
| 7310 | GO_CARBOHYDRATE_CATION_SYMPORTER_ACTIVITY                   | -0.79 | 0.13 | 0 | 0 | 0 | not significant |
| 7311 | GO_CELLULAR_RESPONSE_TO_COLD                                | -0.79 | 0.13 | 0 | 0 | 0 | not significant |
| 7312 | GO_HYDROLASE_ACTIVITY_ACTING_ON_ETHER_BONDS                 | -0.79 | 0.13 | 0 | 0 | 0 | not significant |
| 7313 | GO_MRNA_3_UTR_AU_RICH_REGION_BINDING                        | -0.79 | 0.13 | 0 | 0 | 0 | not significant |
| 7314 | GO_NEGATIVE_REGULATION_OF_OXIDATIVE_STRESS_INDUCED_NEUROI   | -0.79 | 0.13 | 0 | 0 | 0 | not significant |
| 7315 | GO_PEPTIDE_HORMONE_RECEPTOR_BINDING                         | -0.79 | 0.13 | 0 | 0 | 0 | not significant |
| 7316 | GO_REGULATION_OF_RNA_POLYMERASE_II_REGULATORY_REGION_SEI    | -0.79 | 0.13 | 0 | 0 | 0 | not significant |
| 7317 | GO_REPLICATIVE_CELL_AGING                                   | -0.79 | 0.13 | 0 | 0 | 0 | not significant |
| 7318 | KEGG_CIRCADIAN_RHYTHM_MAMMAL                                | -0.79 | 0.13 | 0 | 0 | 0 | not significant |
| 7319 | REACTOME_RUNX3_REGULATES_P14_ARF                            | -0.79 | 0.13 | 0 | 0 | 0 | not significant |
| 7320 | REACTOME_UNWINDING_OF_DNA                                   | -0.79 | 0.13 | 0 | 0 | 0 | not significant |
| 7321 | WIKMAN_ASBESTOS_LUNG_CANCER_UP                              | -0.79 | 0.13 | 0 | 0 | 0 | not significant |
| 7322 | BIOCARTA_PTEN_PATHWAY                                       | -0.79 | 0.12 | 0 | 0 | 0 | not significant |
| 7323 | GO_VESICLE_FUSION_TO_PLASMA_MEMBRANE                        | -0.79 | 0.12 | 0 | 0 | 0 | not significant |
| 7324 | GO_MYOSIN_COMPLEX                                           | -0.79 | 0.11 | 0 | 0 | 0 | not significant |
| 7325 | GO_TRANS_GOLGI_NETWORK_TRANSPORT_VESICLE                    | -0.79 | 0.11 | 0 | 0 | 0 | not significant |
| 7326 | KEGG_HOMOLOGOUS_RECOMBINATION                               | -0.79 | 0.11 | 0 | 0 | 0 | not significant |
| 7327 | BROWNE_HCMV_INFECTION_30MIN_UP                              | -0.79 | 0.10 | 0 | 0 | 0 | not significant |
| 7328 | GO_REGULATION_OF_EXTRINSIC_APOPTOTIC_SIGNALING_PATHWAY_VU   | -0.79 | 0.10 | 0 | 0 | 0 | not significant |
| 7329 | GO_THYMUS_DEVELOPMENT                                       | -0.79 | 0.10 | 0 | 0 | 0 | not significant |
| 7330 | HASLINGER_B CLL_WITH_CHROMOSOME_12_TRISOMY                  | -0.79 | 0.10 | 0 | 0 | 0 | not significant |
| 7331 | SILIGAN_BOUND_BY_EWS_FLT1_FUSION                            | -0.79 | 0.10 | 0 | 0 | 0 | not significant |
| 7332 | GO_3_5_EXONUCLEASE_ACTIVITY                                 | -0.79 | 0.09 | 0 | 0 | 0 | not significant |
| 7333 | GO_PHOSPHOLIPID_CATABOLIC_PROCESS                           | -0.79 | 0.09 | 0 | 0 | 0 | not significant |
| 7334 | GO_POSITIVE_REGULATION_OF_RECEPTOR_MEDIATED_ENDOCYTOSIS     | -0.79 | 0.09 | 0 | 0 | 0 | not significant |
| 7335 | GO_RNA_POLYMERASE_CORE_ENZYME_BINDING                       | -0.79 | 0.09 | 0 | 0 | 0 | not significant |
| 7336 | GO_SIGNAL_TRANSDUCTION_IN_ABSENCE_OF_LIGAND                 | -0.79 | 0.09 | 0 | 0 | 0 | not significant |
| 7337 | STONER_ESOPHAGEAL_CARCINOGENESIS_UP                         | -0.79 | 0.09 | 0 | 0 | 0 | not significant |
| 7338 | GO_REGULATION_OF_NEURAL_PRECURSOR_CELL_PROLIFERATION        | -0.79 | 0.08 | 0 | 0 | 0 | not significant |
| 7339 | GO_XENOBIOTIC_METABOLIC_PROCESS                             | -0.79 | 0.08 | 0 | 0 | 0 | not significant |
| 7340 | GO_DETECTION_OF ABIOTIC STIMULUS                            | -0.79 | 0.07 | 0 | 0 | 0 | not significant |
| 7341 | GO REGULATION OF G PROTEIN COUPLED RECEPTOR SIGNALING P.    | -0.79 | 0.06 | 0 | 0 | 0 | not significant |
| 7342 | GO STEM_CELL_PROLIFERATION                                  | -0.79 | 0.06 | 0 | 0 | 0 | not significant |
| 7343 | KEGG_COLORECTAL_CANCER                                      | -0.79 | 0.06 | 0 | 0 | 0 | not significant |
| 7344 | GO_NEGATIVE_REGULATION_OF_DEPHOSPHORYLATION                 | -0.79 | 0.05 | 0 | 0 | 0 | not significant |
| 7345 | GO_NON_MOTILE_CILIUM                                        | -0.79 | 0.05 | 0 | 0 | 0 | not significant |
| 7346 | GO REGULATION OF MICROTUBULE POLYMERIZATION OR DEPOLYME     | -0.79 | 0.05 | 0 | 0 | 0 | not significant |
| 7347 | GO_JNK_CASCADE                                              | -0.79 | 0.02 | 0 | 0 | 0 | not significant |
| 7348 | KAUFFMANN_DNA_REPAIR_GENES                                  | -0.79 | 0.01 | 0 | 0 | 0 | not significant |
| 7349 | GO_THO_COMPLEX                                              | -0.78 | 0.15 | 0 | 0 | 0 | not significant |
| 7350 | REACTOME_RSK_ACTIVATION                                     | -0.78 | 0.15 | 0 | 0 | 0 | not significant |
| 7351 | GO_ATP_TRANSMEMBRANE_TRANSPORTER_ACTIVITY                   | -0.78 | 0.14 | 0 | 0 | 0 | not significant |
| 7352 | GO_DNA_REPLICATION_FACTOR_C_COMPLEX                         | -0.78 | 0.14 | 0 | 0 | 0 | not significant |
| 7353 | GO_NEGATIVE_REGULATION_OF_EXCITATORY_POSTSYNAPTIC_POTEN     | -0.78 | 0.14 | 0 | 0 | 0 | not significant |
| 7354 | GO_PRE_MRNA_INTRONIC_BINDING                                | -0.78 | 0.14 | 0 | 0 | 0 | not significant |
| 7355 | REACTOME_RUNX3_REGULATES_CDKN1A_TRANSCRIPTION               | -0.78 | 0.14 | 0 | 0 | 0 | not significant |
| 7356 | EHRlich_ICF_SYNDROM_UP                                      | -0.78 | 0.13 | 0 | 0 | 0 | not significant |
| 7357 | GO_CELLULAR_RESPONSE_TO_INSULIN_LIKE_GROWTH_FACTOR_STIML    | -0.78 | 0.13 | 0 | 0 | 0 | not significant |
| 7358 | GO_CYTOPLASMIC_UBIQUITIN_LIGASE_COMPLEX                     | -0.78 | 0.13 | 0 | 0 | 0 | not significant |
| 7359 | GO_HOST_INTRACELLULAR_ORGANELLE                             | -0.78 | 0.13 | 0 | 0 | 0 | not significant |
| 7360 | GO_NEGATIVE_REGULATION_OF_CHOLESTEROL_BIOSYNTHETIC_PROCI    | -0.78 | 0.13 | 0 | 0 | 0 | not significant |
| 7361 | GO POSITIVE REGULATION OF TYPE I INTERFERON MEDIATED SIGN   | -0.78 | 0.13 | 0 | 0 | 0 | not significant |
| 7362 | GO_PROTEIN_LOCALIZATION_TO_ENDOPLASMIC_RETICULUM_EXT_SITE   | -0.78 | 0.13 | 0 | 0 | 0 | not significant |
| 7363 | GO_REGULATION_OF_BICELLULAR_TIGHT_JUNCTION_ASSEMBLY         | -0.78 | 0.13 | 0 | 0 | 0 | not significant |
| 7364 | GO_REGULATION_OF_MALE_GONAD_DEVELOPMENT                     | -0.78 | 0.13 | 0 | 0 | 0 | not significant |
| 7365 | GO SPERMATID NUCLEUS DIFFERENTIATION                        | -0.78 | 0.13 | 0 | 0 | 0 | not significant |
| 7366 | BIOCARTA_RAB_PATHWAY                                        | -0.78 | 0.12 | 0 | 0 | 0 | not significant |
| 7367 | FRASOR_RESPONSE_TO_SERM_OR_FULVESTRANT_UP                   | -0.78 | 0.12 | 0 | 0 | 0 | not significant |
| 7368 | GO ASPARTATE TRANSMEMBRANE TRANSPORT                        | -0.78 | 0.12 | 0 | 0 | 0 | not significant |
| 7369 | GO_MAMMARY_GLAND_EPITHELIAL_CELL_PROLIFERATION              | -0.78 | 0.12 | 0 | 0 | 0 | not significant |
| 7370 | GO MINUS END DIRECTED ORGANELLE TRANSPORT ALONG MICROTI     | -0.78 | 0.12 | 0 | 0 | 0 | not significant |
| 7371 | GO_MITOCHONDRIAL_DEPOLARIZATION                             | -0.78 | 0.12 | 0 | 0 | 0 | not significant |
| 7372 | GO POSITIVE REGULATION OF INSULIN SECRETION INVOLVED IN CEL | -0.78 | 0.12 | 0 | 0 | 0 | not significant |
| 7373 | GO_UBIQUITIN_PROTEIN_TRANSFERASE_REGULATOR_ACTIVITY         | -0.78 | 0.12 | 0 | 0 | 0 | not significant |
| 7374 | KEGG_METABOLISM_OF_XENOBIOTICS_BY_CYTOCHROME_P450           | -0.78 | 0.12 | 0 | 0 | 0 | not significant |
| 7375 | NEBEN_AML_WITH_FLT3_OR_NRAS_DN                              | -0.78 | 0.12 | 0 | 0 | 0 | not significant |
| 7376 | PETRETTO_LEFT_VENTRICLE_MASS_QTL_CIS_DN                     | -0.78 | 0.12 | 0 | 0 | 0 | not significant |
| 7377 | PID_EPHA2_FWD_PATHWAY                                       | -0.78 | 0.12 | 0 | 0 | 0 | not significant |
| 7378 | RAY_TARGETS_OF_P210_BCR_ABL_FUSION_DN                       | -0.78 | 0.12 | 0 | 0 | 0 | not significant |
| 7379 | WAGNER_APO2_SENSITIVITY                                     | -0.78 | 0.12 | 0 | 0 | 0 | not significant |
| 7380 | BIOCARTA_AKT_PATHWAY                                        | -0.78 | 0.11 | 0 | 0 | 0 | not significant |
| 7381 | BOGNI_TREATMENT_RELATED_MYELOID_LEUKEMIA_UP                 | -0.78 | 0.11 | 0 | 0 | 0 | not significant |
| 7382 | GO_RACEMASE_AND_EPIMERASE_ACTIVITY                          | -0.78 | 0.11 | 0 | 0 | 0 | not significant |
| 7383 | GO_VASODILATION                                             | -0.78 | 0.11 | 0 | 0 | 0 | not significant |
| 7384 | NIKOLSKY_BREAST_CANCER_6P24_P22_AMPLICON                    | -0.78 | 0.11 | 0 | 0 | 0 | not significant |
| 7385 | PEDERSEN_METASTASIS_BY_ERBB2_ISOFORM_3                      | -0.78 | 0.11 | 0 | 0 | 0 | not significant |
| 7386 | WELCH_GATA1_TARGETS                                         | -0.78 | 0.11 | 0 | 0 | 0 | not significant |
| 7387 | GO_NEGATIVE_REGULATION_OF_LIPID_LOCALIZATION                | -0.78 | 0.10 | 0 | 0 | 0 | not significant |
| 7388 | GO_SMOOTH_ENDOPLASMIC_RETICULUM                             | -0.78 | 0.10 | 0 | 0 | 0 | not significant |
| 7389 | REACTOME_ATF4_ACTIVATES_GENES_IN_RESPONSE_TO_ENDOPLASMI     | -0.78 | 0.10 | 0 | 0 | 0 | not significant |
| 7390 | REACTOME_CONSTITUTIVE_SIGNALING_BY_AKT1_E17K_IN_CANCER      | -0.78 | 0.10 | 0 | 0 | 0 | not significant |
| 7391 | GO_NEGATIVE_REGULATION_OF_ORGANELLE_ASSEMBLY                | -0.78 | 0.09 | 0 | 0 | 0 | not significant |
| 7392 | GO_RESPONSE_TO_EPIDERMAL_GROWTH_FACTOR                      | -0.78 | 0.09 | 0 | 0 | 0 | not significant |
| 7393 | GO_SCHWANN_CELL_DIFFERENTIATION                             | -0.78 | 0.09 | 0 | 0 | 0 | not significant |
| 7394 | XU_HGF_SIGNALING_NOT_VIA_AKT1_48HR_UP                       | -0.78 | 0.09 | 0 | 0 | 0 | not significant |
| 7395 | GO_ACTIVE_ION_TRANSMEMBRANE_TRANSPORTER_ACTIVITY            | -0.78 | 0.08 | 0 | 0 | 0 | not significant |
| 7396 | GO_TORC1_SIGNALING                                          | -0.78 | 0.08 | 0 | 0 | 0 | not significant |
| 7397 | PID_IL2_PI3K_PATHWAY                                        | -0.78 | 0.08 | 0 | 0 | 0 | not significant |
| 7398 | PID_SHF2_PATHWAY                                            | -0.78 | 0.08 | 0 | 0 | 0 | not significant |
| 7399 | CHR18Q21                                                    | -0.78 | 0.07 | 0 | 0 | 0 | not significant |
| 7400 | GO_INTRACILIARY_TRANSPORT                                   | -0.78 | 0.07 | 0 | 0 | 0 | not significant |

|      |                                                             |       |      |   |   |   |                 |
|------|-------------------------------------------------------------|-------|------|---|---|---|-----------------|
| 7401 | GO_NEGATIVE_REGULATION_OF_INTRACELLULAR_TRANSPORT           | -0.78 | 0.07 | 0 | 0 | 0 | not significant |
| 7402 | GO_SNARE_COMPLEX                                            | -0.78 | 0.07 | 0 | 0 | 0 | not significant |
| 7403 | NADLER_HYPERGLYCEMIA_AT_OBESITY                             | -0.78 | 0.07 | 0 | 0 | 0 | not significant |
| 7404 | REACTOME_NOTCH1_INTRACELLULAR_DOMAIN_REGULATES_TRANSCRI     | -0.78 | 0.07 | 0 | 0 | 0 | not significant |
| 7405 | TCGA_GLIOMASTOMA_COPY_NUMBER_UP                             | -0.78 | 0.07 | 0 | 0 | 0 | not significant |
| 7406 | GO_IRON_ION_BINDING                                         | -0.78 | 0.06 | 0 | 0 | 0 | not significant |
| 7407 | CHRX22                                                      | -0.78 | 0.05 | 0 | 0 | 0 | not significant |
| 7408 | GO_PROTEIN_N_LINKED_GLYCOSYLATION                           | -0.78 | 0.05 | 0 | 0 | 0 | not significant |
| 7409 | GO_NEGATIVE_REGULATION_OF_CELLULAR_AMIDE_METABOLIC_PROCE    | -0.78 | 0.04 | 0 | 0 | 0 | not significant |
| 7410 | REACTOME_MACROAUTOPHAGY                                     | -0.78 | 0.04 | 0 | 0 | 0 | not significant |
| 7411 | DARWICHE_PAPILLOMA_RISK_HIGH_DN                             | -0.78 | 0.02 | 0 | 0 | 0 | not significant |
| 7412 | GO_TRANSCRIPTION_FACTOR_TFIIC_COMPLEX                       | -0.77 | 0.15 | 0 | 0 | 0 | not significant |
| 7413 | CHR19Q12                                                    | -0.77 | 0.14 | 0 | 0 | 0 | not significant |
| 7414 | GO_NEUROTRANSMITTER_GATED_ION_CHANNEL_CLUSTERING            | -0.77 | 0.14 | 0 | 0 | 0 | not significant |
| 7415 | GO_RESPIRATORY_BURST_INVOLVED_IN_DEFENSE_RESPONSE           | -0.77 | 0.14 | 0 | 0 | 0 | not significant |
| 7416 | GO_SPINDLE_ELONGATION                                       | -0.77 | 0.14 | 0 | 0 | 0 | not significant |
| 7417 | REACTOME_SIGNAL_REGULATORY_PROTEIN_FAMILY_INTERACTIONS      | -0.77 | 0.14 | 0 | 0 | 0 | not significant |
| 7418 | GO_KIDNEY_MESENCHYME_DEVELOPMENT                            | -0.77 | 0.13 | 0 | 0 | 0 | not significant |
| 7419 | GO_MUCOSAL_ASSOCIATED_LYMPHOID_TISSUE_DEVELOPMENT           | -0.77 | 0.13 | 0 | 0 | 0 | not significant |
| 7420 | GO_POLYAMINE_TRANSPORT                                      | -0.77 | 0.13 | 0 | 0 | 0 | not significant |
| 7421 | LU_TUMOR_ENDOTHELIAL_MARKERS_UP                             | -0.77 | 0.13 | 0 | 0 | 0 | not significant |
| 7422 | PID_VEGF_VEGFR_PATHWAY                                      | -0.77 | 0.13 | 0 | 0 | 0 | not significant |
| 7423 | REACTOME_SIGNALING_BY_TGF_BETA_RECEPTOR_COMPLEX_IN_CANC     | -0.77 | 0.13 | 0 | 0 | 0 | not significant |
| 7424 | REACTOME_SUMO_IS_TRANSFERRED_FROM_E1_TO_E2_UBE2_UBC9        | -0.77 | 0.13 | 0 | 0 | 0 | not significant |
| 7425 | BIOCARTA_D4GDI_PATHWAY                                      | -0.77 | 0.12 | 0 | 0 | 0 | not significant |
| 7426 | CAFFAREL_RESPONSE_TO_THC_8HR_5_DN                           | -0.77 | 0.12 | 0 | 0 | 0 | not significant |
| 7427 | GALE_APL_WITH_FLT3_MUTATED_DN                               | -0.77 | 0.12 | 0 | 0 | 0 | not significant |
| 7428 | GO_DNA_REPLICATION_PREINITIATION_COMPLEX                    | -0.77 | 0.12 | 0 | 0 | 0 | not significant |
| 7429 | GO_REGULATION_OF_STEROID_HORMONE_BIOSYNTHETIC_PROCESS       | -0.77 | 0.12 | 0 | 0 | 0 | not significant |
| 7430 | REACTOME_GLYCEROPHOSPHOLIPID_CATABOLISM                     | -0.77 | 0.12 | 0 | 0 | 0 | not significant |
| 7431 | WESTON_VEGFA_TARGETS_12HR                                   | -0.77 | 0.12 | 0 | 0 | 0 | not significant |
| 7432 | GO_C_ACYLTRANSFERASE_ACTIVITY                               | -0.77 | 0.11 | 0 | 0 | 0 | not significant |
| 7433 | GO_MAMMARY_GLAND_DUCT_MORPHOGENESIS                         | -0.77 | 0.11 | 0 | 0 | 0 | not significant |
| 7434 | GO_MISMATCHED_DNA_BINDING                                   | -0.77 | 0.11 | 0 | 0 | 0 | not significant |
| 7435 | REACTOME_RETROGRADE_NEUROTROPHIN_SIGNALLING                 | -0.77 | 0.11 | 0 | 0 | 0 | not significant |
| 7436 | REACTOME_SODIUM_PROTON_EXCHANGERS                           | -0.77 | 0.11 | 0 | 0 | 0 | not significant |
| 7437 | ZEMBUTSU_SENSITIVITY_TO_CYCLOPHOSPHAMIDE                    | -0.77 | 0.11 | 0 | 0 | 0 | not significant |
| 7438 | GO_CELLULAR_BIOGENIC_AMINE_METABOLIC_PROCESS                | -0.77 | 0.10 | 0 | 0 | 0 | not significant |
| 7439 | GO_FERROUS_IRON_BINDING                                     | -0.77 | 0.10 | 0 | 0 | 0 | not significant |
| 7440 | GO_MEMBRANE_PROTEIN_ECTODOMAIN_PROTEOLYSIS                  | -0.77 | 0.10 | 0 | 0 | 0 | not significant |
| 7441 | GO_MISFOLDED_PROTEIN_BINDING                                | -0.77 | 0.10 | 0 | 0 | 0 | not significant |
| 7442 | GO_NEGATIVE_REGULATION_OF_PROTEIN_TYROSINE_KINASE_ACTIVITY  | -0.77 | 0.10 | 0 | 0 | 0 | not significant |
| 7443 | GO_NEGATIVE_REGULATION_OF_SIGNAL_TRANSDUCTION_BY_P53_CLA    | -0.77 | 0.10 | 0 | 0 | 0 | not significant |
| 7444 | GO_PEROXISOME_PROLIFERATOR_ACTIVATED_RECEPTOR_SIGNALING     | -0.77 | 0.10 | 0 | 0 | 0 | not significant |
| 7445 | GO_TRANSCRIPTIONALLY_ACTIVE_CHROMATIN                       | -0.77 | 0.10 | 0 | 0 | 0 | not significant |
| 7446 | BIOCARTA_AGR_PATHWAY                                        | -0.77 | 0.09 | 0 | 0 | 0 | not significant |
| 7447 | DEMAGALHAES_AGING_UP                                        | -0.77 | 0.09 | 0 | 0 | 0 | not significant |
| 7448 | GO_DENDRITE_EXTENSION                                       | -0.77 | 0.09 | 0 | 0 | 0 | not significant |
| 7449 | GO_GLYCOSYL_COMPOUND_CATABOLIC_PROCESS                      | -0.77 | 0.09 | 0 | 0 | 0 | not significant |
| 7450 | GO_NEGATIVE_REGULATION_OF_STRIATED_MUSCLE_CELL_DIFFERENT    | -0.77 | 0.09 | 0 | 0 | 0 | not significant |
| 7451 | GU_PDEF_TARGETS_UP                                          | -0.77 | 0.09 | 0 | 0 | 0 | not significant |
| 7452 | REACTOME_DISEASES_OF_CARBOHYDRATE_METABOLISM                | -0.77 | 0.09 | 0 | 0 | 0 | not significant |
| 7453 | BIOCARTA_INSULIN_PATHWAY                                    | -0.77 | 0.08 | 0 | 0 | 0 | not significant |
| 7454 | CHR6P25                                                     | -0.77 | 0.08 | 0 | 0 | 0 | not significant |
| 7455 | GO_DETECTION_OF_VISIBLE_LIGHT                               | -0.77 | 0.08 | 0 | 0 | 0 | not significant |
| 7456 | LU_THYROID_CANCER_CLUSTER_1                                 | -0.77 | 0.07 | 0 | 0 | 0 | not significant |
| 7457 | PID_LYSOPHOSPHOLIPID_PATHWAY                                | -0.77 | 0.06 | 0 | 0 | 0 | not significant |
| 7458 | WAKASUGI_HAVE_ZNF143_BINDING_SITES                          | -0.77 | 0.06 | 0 | 0 | 0 | not significant |
| 7459 | GO_RETROGRADE_TRANSPORT_ENDOSOME_TO_GOLGI                   | -0.77 | 0.05 | 0 | 0 | 0 | not significant |
| 7460 | GO_HISTONE_DEACETYLATION                                    | -0.77 | 0.04 | 0 | 0 | 0 | not significant |
| 7461 | GO_REGULATION_OF_PEPTIDYL_SERINE_PHOSPHORYLATION            | -0.77 | 0.04 | 0 | 0 | 0 | not significant |
| 7462 | GO_RNA_POLYMERASE_II_SPECIFIC_DNA_BINDING_TRANSCRIPTION_FAC | -0.77 | 0.01 | 0 | 0 | 0 | not significant |
| 7463 | NOUZOVA_TRETINOIN_AND_H4_ACETYLATION                        | -0.77 | 0.01 | 0 | 0 | 0 | not significant |
| 7464 | SHEN_SMARCA2_TARGETS_UP                                     | -0.77 | 0.00 | 0 | 0 | 0 | not significant |
| 7465 | CHESLER_BRAIN_QTL_TRANS                                     | -0.76 | 0.13 | 0 | 0 | 0 | not significant |
| 7466 | GO_METANEPHRIC_MESENCHYME_DEVELOPMENT                       | -0.76 | 0.13 | 0 | 0 | 0 | not significant |
| 7467 | GO_NEGATIVE_REGULATION_OF_PRODUCTION_OF_MIRNAS_INVOLVED     | -0.76 | 0.13 | 0 | 0 | 0 | not significant |
| 7468 | GO_POSITIVE_REGULATION_OF_NON_MOTILE_CILIUM_ASSEMBLY        | -0.76 | 0.13 | 0 | 0 | 0 | not significant |
| 7469 | GO_REGULATION_OF_GTP_BINDING                                | -0.76 | 0.13 | 0 | 0 | 0 | not significant |
| 7470 | GO_REGULATION_OF_LIPOPROTEIN_LIPASE_ACTIVITY                | -0.76 | 0.13 | 0 | 0 | 0 | not significant |
| 7471 | GO_UTP_BIOSYNTHETIC_PROCESS                                 | -0.76 | 0.13 | 0 | 0 | 0 | not significant |
| 7472 | LIM_MAMMARY_LUMINAL_PROGENITOR_DN                           | -0.76 | 0.13 | 0 | 0 | 0 | not significant |
| 7473 | REACTOME_PHOSPHATE_BOND_HYDROLYSIS_BY_NUDT_PROTEINS         | -0.76 | 0.13 | 0 | 0 | 0 | not significant |
| 7474 | BALLIF_DEVELOPMENTAL_DISABILITY_P16_P12_DELETION            | -0.76 | 0.12 | 0 | 0 | 0 | not significant |
| 7475 | GO_GABA_RECEPTOR_BINDING                                    | -0.76 | 0.12 | 0 | 0 | 0 | not significant |
| 7476 | GO_LYS48_SPECIFIC_DEUBIQUITINASE_ACTIVITY                   | -0.76 | 0.12 | 0 | 0 | 0 | not significant |
| 7477 | GO_OLIGOPEPTIDE_TRANSPORT                                   | -0.76 | 0.12 | 0 | 0 | 0 | not significant |
| 7478 | GO_PHOSPHATIDYLINOSITOL_BISPHOSPHATE_KINASE_ACTIVITY        | -0.76 | 0.12 | 0 | 0 | 0 | not significant |
| 7479 | GO_POSITIVE_REGULATION_OF_PROTEIN_DEUBIQUITINATION          | -0.76 | 0.12 | 0 | 0 | 0 | not significant |
| 7480 | GO_REGULATION_OF_HYDROGEN_PEROXIDE_METABOLIC_PROCESS        | -0.76 | 0.12 | 0 | 0 | 0 | not significant |
| 7481 | GO_SINGLE_STRANDED_DNA_ENDODEOXYRIBONUCLEASE_ACTIVITY       | -0.76 | 0.12 | 0 | 0 | 0 | not significant |
| 7482 | GO_TRANSLATION_ACTIVATOR_ACTIVITY                           | -0.76 | 0.12 | 0 | 0 | 0 | not significant |
| 7483 | REACTOME_VEGF_LIGAND_RECEPTOR_INTERACTIONS                  | -0.76 | 0.12 | 0 | 0 | 0 | not significant |
| 7484 | SEMBA_FHIT_TARGETS_DN                                       | -0.76 | 0.12 | 0 | 0 | 0 | not significant |
| 7485 | ZHAN_EARLY_DIFFERENTIATION_GENES_UP                         | -0.76 | 0.12 | 0 | 0 | 0 | not significant |
| 7486 | BIOCARTA_LEPTIN_PATHWAY                                     | -0.76 | 0.11 | 0 | 0 | 0 | not significant |
| 7487 | DORN_ADENOVIRUS_INFECTION_48HR_UP                           | -0.76 | 0.11 | 0 | 0 | 0 | not significant |
| 7488 | GEISS_RESPONSE_TO_DSRNA_DN                                  | -0.76 | 0.11 | 0 | 0 | 0 | not significant |
| 7489 | GO_DENDRITIC_CELL_CYTOKINE_PRODUCTION                       | -0.76 | 0.11 | 0 | 0 | 0 | not significant |
| 7490 | GO_ER_MEMBRANE_PROTEIN_COMPLEX                              | -0.76 | 0.11 | 0 | 0 | 0 | not significant |
| 7491 | GO_LIGASE_ACTIVITY_FORMING_CARBON_CARBON_BONDS              | -0.76 | 0.11 | 0 | 0 | 0 | not significant |
| 7492 | GO_PALMITOYLTRANSFERASE_COMPLEX                             | -0.76 | 0.11 | 0 | 0 | 0 | not significant |
| 7493 | GO_POSITIVE_REGULATION_OF_HEART_CONTRACTION                 | -0.76 | 0.11 | 0 | 0 | 0 | not significant |
| 7494 | GO_POSITIVE_REGULATION_OF_HISTONE_PHOSPHORYLATION           | -0.76 | 0.11 | 0 | 0 | 0 | not significant |
| 7495 | GO_PURINERGIC_RECEPTOR_ACTIVITY                             | -0.76 | 0.11 | 0 | 0 | 0 | not significant |
| 7496 | GO_REGULATION_OF_CELL_CELL_ADHESION_MEDIATED_BY_CADHERIN    | -0.76 | 0.11 | 0 | 0 | 0 | not significant |
| 7497 | GO_RESPONSE_TO_LEPTIN                                       | -0.76 | 0.11 | 0 | 0 | 0 | not significant |
| 7498 | ZHOU_CELL_CYCLE_GENES_IN_IR_RESPONSE_2HR                    | -0.76 | 0.11 | 0 | 0 | 0 | not significant |
| 7499 | GO_GTP_METABOLIC_PROCESS                                    | -0.76 | 0.10 | 0 | 0 | 0 | not significant |
| 7500 | GO_NEUROPEPTIDE_SIGNALING_PATHWAY                           | -0.76 | 0.10 | 0 | 0 | 0 | not significant |
| 7501 | GO_PLACENTA_BLOOD_VESSEL_DEVELOPMENT                        | -0.76 | 0.10 | 0 | 0 | 0 | not significant |
| 7502 | REACTOME_MECP2_REGULATES_NEURONAL_RECEPTORS_AND_CHANN       | -0.76 | 0.10 | 0 | 0 | 0 | not significant |
| 7503 | GO_LEUKOCYTE_ADHESION_TO_VASCULAR_ENDOTHELIAL_CELL          | -0.76 | 0.09 | 0 | 0 | 0 | not significant |
| 7504 | REACTOME_PRE_NOTCH_PROCESSING_IN_GOLGI                      | -0.76 | 0.09 | 0 | 0 | 0 | not significant |
| 7505 | WANG_BARRETTS_ESOPHAGUS_DN                                  | -0.76 | 0.09 | 0 | 0 | 0 | not significant |
| 7506 | GO_NEUROBLAST_PROLIFERATION                                 | -0.76 | 0.08 | 0 | 0 | 0 | not significant |
| 7507 | GO_POSITIVE_REGULATION_OF_GLUCOSE_TRANSMEMBRANE_TRANSPC     | -0.76 | 0.08 | 0 | 0 | 0 | not significant |
| 7508 | GO_REGULATION_OF_ORGANIC_ACID_TRANSPORT                     | -0.76 | 0.08 | 0 | 0 | 0 | not significant |
| 7509 | REACTOME_CARGO_CONCENTRATION_IN_THE_ER                      | -0.76 | 0.08 | 0 | 0 | 0 | not significant |

|      |                                                            |       |      |   |   |   |                 |
|------|------------------------------------------------------------|-------|------|---|---|---|-----------------|
| 7510 | REACTOME_PEROXISOMAL_LIPID_METABOLISM                      | -0.76 | 0.08 | 0 | 0 | 0 | not significant |
| 7511 | BURTON_ADIPOGENESIS_12                                     | -0.76 | 0.07 | 0 | 0 | 0 | not significant |
| 7512 | GO_LAMELLIPODIUM_ASSEMBLY                                  | -0.76 | 0.07 | 0 | 0 | 0 | not significant |
| 7513 | GO_REGULATION_OF_VASCULAR_SMOOTH_MUSCLE_CELL_PROLIFERA'    | -0.76 | 0.07 | 0 | 0 | 0 | not significant |
| 7514 | HAHTOLA_MYCOSIS_FUNGOIDES_CD4_UP                           | -0.76 | 0.07 | 0 | 0 | 0 | not significant |
| 7515 | BIOCARTA_NFAT_PATHWAY                                      | -0.76 | 0.06 | 0 | 0 | 0 | not significant |
| 7516 | GO_REGULATION_OF_PROTEIN_TYROSINE_KINASE_ACTIVITY          | -0.76 | 0.06 | 0 | 0 | 0 | not significant |
| 7517 | CHR3Q13                                                    | -0.76 | 0.05 | 0 | 0 | 0 | not significant |
| 7518 | GO_REGULATION_OF_SYNAPSE_ASSEMBLY                          | -0.76 | 0.05 | 0 | 0 | 0 | not significant |
| 7519 | REACTOME_MEIOTIC_SYNAPSIS                                  | -0.76 | 0.05 | 0 | 0 | 0 | not significant |
| 7520 | GO_NEURAL_TUBE_FORMATION                                   | -0.76 | 0.04 | 0 | 0 | 0 | not significant |
| 7521 | GO_POSITIVE_REGULATION_OF_PROTEIN_BINDING                  | -0.76 | 0.04 | 0 | 0 | 0 | not significant |
| 7522 | YEGNASUBRAMANIAN_PROSTATE_CANCER                           | -0.76 | 0.04 | 0 | 0 | 0 | not significant |
| 7523 | GO_NUCLEAR_RECEPTOR_BINDING                                | -0.76 | 0.03 | 0 | 0 | 0 | not significant |
| 7524 | GO_GOLGI_ASSOCIATED_VESICLE                                | -0.76 | 0.02 | 0 | 0 | 0 | not significant |
| 7525 | GO_PROTEIN_KINASE_B_SIGNALING                              | -0.76 | 0.02 | 0 | 0 | 0 | not significant |
| 7526 | GO_SYNAPTIC_VESICLE_CYCLE                                  | -0.76 | 0.02 | 0 | 0 | 0 | not significant |
| 7527 | GO_HORMONE_RECEPTOR_BINDING                                | -0.76 | 0.01 | 0 | 0 | 0 | not significant |
| 7528 | CHR20Q12                                                   | -0.75 | 0.13 | 0 | 0 | 0 | not significant |
| 7529 | GO_SUSCEPTIBILITY_TO_NATURAL_KILLER_CELL_MEDIATED_CYTOTOXI | -0.75 | 0.12 | 0 | 0 | 0 | not significant |
| 7530 | BAUS_TFF2_TARGETS_DN                                       | -0.75 | 0.11 | 0 | 0 | 0 | not significant |
| 7531 | GO_BIOTIN_METABOLIC_PROCESS                                | -0.75 | 0.11 | 0 | 0 | 0 | not significant |
| 7532 | GO_DEOXYRIBOSE_PHOSPHATE_BIOSYNTHETIC_PROCESS              | -0.75 | 0.11 | 0 | 0 | 0 | not significant |
| 7533 | GO_LOW_DENSITY_LIPOPROTEIN_PARTICLE_RECEPTOR_ACTIVITY      | -0.75 | 0.11 | 0 | 0 | 0 | not significant |
| 7534 | GO_NEGATIVE_REGULATION_OF_MACROPHAGE_MIGRATION             | -0.75 | 0.11 | 0 | 0 | 0 | not significant |
| 7535 | GO_POSITIVE_REGULATION_OF_TRANSCRIPTION_BY_RNA_POLYMERASI  | -0.75 | 0.11 | 0 | 0 | 0 | not significant |
| 7536 | GO_POSTSYNAPTIC_NEUROTRANSMITTER_RECEPTOR_ACTIVITY         | -0.75 | 0.11 | 0 | 0 | 0 | not significant |
| 7537 | GO_REGULATION_OF_AEROBIC_RESPIRATION                       | -0.75 | 0.11 | 0 | 0 | 0 | not significant |
| 7538 | GO_REGULATION_OF_ATP_BIOSYNTHETIC_PROCESS                  | -0.75 | 0.11 | 0 | 0 | 0 | not significant |
| 7539 | GO_REGULATION_OF_HEART_RATE_BY_CHEMICAL_SIGNAL             | -0.75 | 0.11 | 0 | 0 | 0 | not significant |
| 7540 | GO_TRANSCYTOSIS                                            | -0.75 | 0.11 | 0 | 0 | 0 | not significant |
| 7541 | MIKKELSEN_IPS_ICP_WITH_H3K27ME3                            | -0.75 | 0.11 | 0 | 0 | 0 | not significant |
| 7542 | ZHENG_FOXP3_TARGETS_IN_T_LYMPHOCYTE_UP                     | -0.75 | 0.11 | 0 | 0 | 0 | not significant |
| 7543 | GO_COMMON_PARTNER_SMAD_PROTEIN_PHOSPHORYLATION             | -0.75 | 0.10 | 0 | 0 | 0 | not significant |
| 7544 | GO_GLYCOGEN_GRANULE                                        | -0.75 | 0.10 | 0 | 0 | 0 | not significant |
| 7545 | HAHTOLA_MYCOSIS_FUNGOIDES_UP                               | -0.75 | 0.10 | 0 | 0 | 0 | not significant |
| 7546 | SPIELMAN_LYMPHOBLAST_EUROPEAN_VS_ASIAN_2FC_UP              | -0.75 | 0.10 | 0 | 0 | 0 | not significant |
| 7547 | BIOCARTA_HCMV_PATHWAY                                      | -0.75 | 0.09 | 0 | 0 | 0 | not significant |
| 7548 | GO_CEREBRAL_CORTEX_CELL_MIGRATION                          | -0.75 | 0.09 | 0 | 0 | 0 | not significant |
| 7549 | REACTOME_BIOTIN_TRANSPORT_AND_METABOLISM                   | -0.75 | 0.09 | 0 | 0 | 0 | not significant |
| 7550 | GO_EXODEOXYRIBONUCLEASE_ACTIVITY                           | -0.75 | 0.08 | 0 | 0 | 0 | not significant |
| 7551 | GO_MITOCHONDRIAL_FUSION                                    | -0.75 | 0.08 | 0 | 0 | 0 | not significant |
| 7552 | GO_NEGATIVE_REGULATION_OF_BLOOD_PRESSURE                   | -0.75 | 0.08 | 0 | 0 | 0 | not significant |
| 7553 | GO_ENDODERM_FORMATION                                      | -0.75 | 0.07 | 0 | 0 | 0 | not significant |
| 7554 | GO_GLYCOSYL_COMPOUND_BIOSYNTHETIC_PROCESS                  | -0.75 | 0.07 | 0 | 0 | 0 | not significant |
| 7555 | REACTOME_CASPASE_ACTIVATION_VIA_EXTRINSIC_APOPTOTIC_SIGNAL | -0.75 | 0.07 | 0 | 0 | 0 | not significant |
| 7556 | REACTOME_EGFR_DOWNREGULATION                               | -0.75 | 0.07 | 0 | 0 | 0 | not significant |
| 7557 | CHANGOLKAR_H2AFY_TARGETS_UP                                | -0.75 | 0.06 | 0 | 0 | 0 | not significant |
| 7558 | SUBTIL_PROGESTIN_TARGETS                                   | -0.75 | 0.06 | 0 | 0 | 0 | not significant |
| 7559 | BOYALULT_LIVER_CANCER_SUBCLASS_G12_UP                      | -0.75 | 0.05 | 0 | 0 | 0 | not significant |
| 7560 | GO_SCF_UBIQUITIN_LIGASE_COMPLEX                            | -0.75 | 0.05 | 0 | 0 | 0 | not significant |
| 7561 | KEGG_VEGF_SIGNALING_PATHWAY                                | -0.75 | 0.05 | 0 | 0 | 0 | not significant |
| 7562 | PID_P13KCI_PATHWAY                                         | -0.75 | 0.05 | 0 | 0 | 0 | not significant |
| 7563 | RIZKI_TUMOR_INVASIVENESS_2D_DN                             | -0.75 | 0.05 | 0 | 0 | 0 | not significant |
| 7564 | GO_REGULATION_OF_EMBRYONIC_DEVELOPMENT                     | -0.75 | 0.04 | 0 | 0 | 0 | not significant |
| 7565 | GO_NEURAL_PRECURSOR_CELL_PROLIFERATION                     | -0.75 | 0.03 | 0 | 0 | 0 | not significant |
| 7566 | BROWNIE_HCMV_INFECTION_18HR_UP                             | -0.75 | 0.01 | 0 | 0 | 0 | not significant |
| 7567 | GO_DNA_BINDING_TRANSCRIPTION_FACTOR_BINDING                | -0.75 | 0.00 | 0 | 0 | 0 | not significant |
| 7568 | GO_MACROAUTOPHAGY                                          | -0.75 | 0.00 | 0 | 0 | 0 | not significant |
| 7569 | GO_REGULATION_OF_AUTOPHAGY                                 | -0.75 | 0.00 | 0 | 0 | 0 | not significant |
| 7570 | GO_COPPER_ION_TRANSMEMBRANE_TRANSPORT                      | -0.74 | 0.13 | 0 | 0 | 0 | not significant |
| 7571 | DONATO_CELL_CYCLE_TRETINOLIN                               | -0.74 | 0.12 | 0 | 0 | 0 | not significant |
| 7572 | GO_IKAPPAB_KINASE_COMPLEX                                  | -0.74 | 0.12 | 0 | 0 | 0 | not significant |
| 7573 | GO_PERIPHERAL_NERVOUS_SYSTEM_NEURON_DIFFERENTIATION        | -0.74 | 0.12 | 0 | 0 | 0 | not significant |
| 7574 | GO_POSITIVE_REGULATION_OF_PROTEIN_EXIT_FROM_ENDOPLASMIC_F  | -0.74 | 0.12 | 0 | 0 | 0 | not significant |
| 7575 | GO_RNA_POLYMERASE_II_CTD_HEPTAPEPTIDE_REPEAT_PHOSPHATASE   | -0.74 | 0.12 | 0 | 0 | 0 | not significant |
| 7576 | GO_AROMATIC_AMINO_ACID_TRANSMEMBRANE_TRANSPORTER_ACTIVI    | -0.74 | 0.11 | 0 | 0 | 0 | not significant |
| 7577 | GO_FATTY_ACYL_COA_METABOLIC_PROCESS                        | -0.74 | 0.11 | 0 | 0 | 0 | not significant |
| 7578 | GO_GLYCOPROTEIN_CATABOLIC_PROCESS                          | -0.74 | 0.11 | 0 | 0 | 0 | not significant |
| 7579 | GO_GUANYLYLTRANSFERASE_ACTIVITY                            | -0.74 | 0.11 | 0 | 0 | 0 | not significant |
| 7580 | GO_INTERLEUKIN_35_MEDIATED_SIGNALING_PATHWAY               | -0.74 | 0.11 | 0 | 0 | 0 | not significant |
| 7581 | GO_INTERMEDIATE_FILAMENT_BINDING                           | -0.74 | 0.11 | 0 | 0 | 0 | not significant |
| 7582 | GO_MONOVALENT_CATION_PROTON_ANTIPORTER_ACTIVITY            | -0.74 | 0.11 | 0 | 0 | 0 | not significant |
| 7583 | GO_NEPHRIC_DUCT_MORPHOGENESIS                              | -0.74 | 0.11 | 0 | 0 | 0 | not significant |
| 7584 | GO_RNA_POLYMERASE_III_TRANSCRIPTION_FACTOR_COMPLEX         | -0.74 | 0.11 | 0 | 0 | 0 | not significant |
| 7585 | GO_TELOMERASE_HOLOENZYME_COMPLEX_ASSEMBLY                  | -0.74 | 0.11 | 0 | 0 | 0 | not significant |
| 7586 | REACTOME_DCC_MEDIATED_ATTRACTIVE_SIGNALING                 | -0.74 | 0.11 | 0 | 0 | 0 | not significant |
| 7587 | REACTOME_NONCANONICAL_ACTIVATION_OF_NOTCH3                 | -0.74 | 0.11 | 0 | 0 | 0 | not significant |
| 7588 | BIOCARTA_SPRY_PATHWAY                                      | -0.74 | 0.10 | 0 | 0 | 0 | not significant |
| 7589 | GO_ACETYL_COA_C_ACYLTRANSFERASE_ACTIVITY                   | -0.74 | 0.10 | 0 | 0 | 0 | not significant |
| 7590 | GO_AORTIC_VALVE_DEVELOPMENT                                | -0.74 | 0.10 | 0 | 0 | 0 | not significant |
| 7591 | GO_POSITIVE_REGULATION_OF_ATP_BIOSYNTHETIC_PROCESS         | -0.74 | 0.10 | 0 | 0 | 0 | not significant |
| 7592 | GO_POSITIVE_REGULATION_OF_TELOMERE_CAPPING                 | -0.74 | 0.10 | 0 | 0 | 0 | not significant |
| 7593 | HOLLERN_MICROACINAR_BREAST_TUMOR_DN                        | -0.74 | 0.10 | 0 | 0 | 0 | not significant |
| 7594 | NIKOLSKY_BREAST_CANCER_10Q22_AMPlicON                      | -0.74 | 0.10 | 0 | 0 | 0 | not significant |
| 7595 | PEPPER_CHRONIC_LYMPHOCTIC_LEUKEMIA_UP                      | -0.74 | 0.10 | 0 | 0 | 0 | not significant |
| 7596 | REACTOME_JOSEPHIN_DOMAIN_DUBS                              | -0.74 | 0.10 | 0 | 0 | 0 | not significant |
| 7597 | GO_UMP_BIOSYNTHETIC_PROCESS                                | -0.74 | 0.09 | 0 | 0 | 0 | not significant |
| 7598 | MAGRANGEAS_MULTIPLE_MYELOMA_IGLL_VS_IGLK_DN                | -0.74 | 0.09 | 0 | 0 | 0 | not significant |
| 7599 | REACTOME_PROCESSING_AND_ACTIVATION_OF_SUMO                 | -0.74 | 0.09 | 0 | 0 | 0 | not significant |
| 7600 | CHR17P12                                                   | -0.74 | 0.08 | 0 | 0 | 0 | not significant |
| 7601 | GO_CHOLESTEROL_EFFLUX                                      | -0.74 | 0.08 | 0 | 0 | 0 | not significant |
| 7602 | GO_Glutamate_Metabolic_Process                             | -0.74 | 0.08 | 0 | 0 | 0 | not significant |
| 7603 | GO_INTRACILIARY_TRANSPORT_PARTICLE_B                       | -0.74 | 0.08 | 0 | 0 | 0 | not significant |
| 7604 | GO_NUCLEOTIDE_EXCISION_REPAIR_DNA_DUPLEX_UNWINDING         | -0.74 | 0.08 | 0 | 0 | 0 | not significant |
| 7605 | GO_POSITIVE_REGULATION_OF_SMOOTH_MUSCLE_CELL_MIGRATION     | -0.74 | 0.08 | 0 | 0 | 0 | not significant |
| 7606 | GO_PYRIMIDINE_NUCLEOTIDE_CATABOLIC_PROCESS                 | -0.74 | 0.08 | 0 | 0 | 0 | not significant |
| 7607 | GO_SPERM_EGG_RECOGNITION                                   | -0.74 | 0.08 | 0 | 0 | 0 | not significant |
| 7608 | REACTOME_DEFECTS_IN_VITAMIN_AND_COFACTOR_METABOLISM        | -0.74 | 0.08 | 0 | 0 | 0 | not significant |
| 7609 | GO_POSITIVE_REGULATION_OF_TOR_SIGNALING                    | -0.74 | 0.07 | 0 | 0 | 0 | not significant |
| 7610 | KAAB_FAILED_HEART_ATRIUM_UP                                | -0.74 | 0.07 | 0 | 0 | 0 | not significant |
| 7611 | PID_RAC1_REG_PATHWAY                                       | -0.74 | 0.07 | 0 | 0 | 0 | not significant |
| 7612 | ENGELMANN_CANCER_PROGENITORS_DN                            | -0.74 | 0.06 | 0 | 0 | 0 | not significant |
| 7613 | GO_AMMONIUM_ION_BINDING                                    | -0.74 | 0.06 | 0 | 0 | 0 | not significant |
| 7614 | GO_PERICENTRIOLAR_MATERIAL                                 | -0.74 | 0.06 | 0 | 0 | 0 | not significant |
| 7615 | CHR1P31                                                    | -0.74 | 0.05 | 0 | 0 | 0 | not significant |
| 7616 | CHR2P11                                                    | -0.74 | 0.05 | 0 | 0 | 0 | not significant |
| 7617 | J1_RESPONSE_TO_FSH_DN                                      | -0.74 | 0.05 | 0 | 0 | 0 | not significant |
| 7618 | KEGG_DNA_REPLICATION                                       | -0.74 | 0.05 | 0 | 0 | 0 | not significant |

|      |                                                            |       |      |   |   |   |                 |
|------|------------------------------------------------------------|-------|------|---|---|---|-----------------|
| 7619 | PID_INSULIN_PATHWAY                                        | -0.74 | 0.05 | 0 | 0 | 0 | not significant |
| 7620 | RASHI_RESPONSE_TO_IONIZING_RADIATION_4                     | -0.74 | 0.05 | 0 | 0 | 0 | not significant |
| 7621 | GO_HETEROCHROMATIN                                         | -0.74 | 0.03 | 0 | 0 | 0 | not significant |
| 7622 | GO_POSITIVE_REGULATION_OF_PLASMA_MEMBRANE_BOUNDED_CELL     | -0.74 | 0.03 | 0 | 0 | 0 | not significant |
| 7623 | KEGG_MAPK_SIGNALING_PATHWAY                                | -0.74 | 0.00 | 0 | 0 | 0 | not significant |
| 7624 | GO_PONS_DEVELOPMENT                                        | -0.73 | 0.12 | 0 | 0 | 0 | not significant |
| 7625 | GO_NEGATIVE_REGULATION_OF_CALCIUM_ION_DEPENDENT_EXOCYTO    | -0.73 | 0.11 | 0 | 0 | 0 | not significant |
| 7626 | GO_REGULATION_OF_RESPONSE_TO_TUMOR_CELL                    | -0.73 | 0.11 | 0 | 0 | 0 | not significant |
| 7627 | MINGUEZ_LIVER_CANCER_VASCULAR_INVASION_DN                  | -0.73 | 0.11 | 0 | 0 | 0 | not significant |
| 7628 | AMIT_EGF_RESPONSE_20_HELA                                  | -0.73 | 0.10 | 0 | 0 | 0 | not significant |
| 7629 | GO_AT_DNA_BINDING                                          | -0.73 | 0.10 | 0 | 0 | 0 | not significant |
| 7630 | GO_CELLULAR_RESPONSE_TO_ATP                                | -0.73 | 0.10 | 0 | 0 | 0 | not significant |
| 7631 | GO_DIPHOSPHOTRANSFERASE_ACTIVITY                           | -0.73 | 0.10 | 0 | 0 | 0 | not significant |
| 7632 | REACTOME_RECEPTOR_MEDIATED_MITOPHAGY                       | -0.73 | 0.10 | 0 | 0 | 0 | not significant |
| 7633 | GO_5S_RRNA_BINDING                                         | -0.73 | 0.09 | 0 | 0 | 0 | not significant |
| 7634 | GO_LEUKOCYTE_AGGREGATION                                   | -0.73 | 0.09 | 0 | 0 | 0 | not significant |
| 7635 | GO_PHOSPHATIDYLINOSITOL_3_PHOSPHATE_BIOSYNTHETIC_PROCESS   | -0.73 | 0.09 | 0 | 0 | 0 | not significant |
| 7636 | GO_POSITIVE_REGULATION_OF_CARDIAC_MUSCLE_CELL_DIFFERENTIA  | -0.73 | 0.09 | 0 | 0 | 0 | not significant |
| 7637 | GO_PROTEIN_PROCESSING_INVOLVED_IN_PROTEIN_TARGETING_TO_MI  | -0.73 | 0.09 | 0 | 0 | 0 | not significant |
| 7638 | GO_PYRIMIDINE_RIBONUCLEOTIDE_BIOSYNTHETIC_PROCESS          | -0.73 | 0.09 | 0 | 0 | 0 | not significant |
| 7639 | BIOCARTA_RANKL_PATHWAY                                     | -0.73 | 0.08 | 0 | 0 | 0 | not significant |
| 7640 | GO_WW_DOMAIN_BINDING                                       | -0.73 | 0.08 | 0 | 0 | 0 | not significant |
| 7641 | KEGG_ONE_CARBON_POOL_BY_FOLATE                             | -0.73 | 0.08 | 0 | 0 | 0 | not significant |
| 7642 | REACTOME_TICAM1_DEPENDENT_ACTIVATION_OF_IRF3_IRF7          | -0.73 | 0.08 | 0 | 0 | 0 | not significant |
| 7643 | WATANABE_COLON_CANCER_MSI_VS_MSS_DN                        | -0.73 | 0.08 | 0 | 0 | 0 | not significant |
| 7644 | GO_BHLH_TRANSCRIPTION_FACTOR_BINDING                       | -0.73 | 0.07 | 0 | 0 | 0 | not significant |
| 7645 | GO_SODIUM_ION_HOMEOSTASIS                                  | -0.73 | 0.07 | 0 | 0 | 0 | not significant |
| 7646 | GO_VIRAL_LATENCY                                           | -0.73 | 0.07 | 0 | 0 | 0 | not significant |
| 7647 | LEE_AGING_MUSCLE_DN                                        | -0.73 | 0.07 | 0 | 0 | 0 | not significant |
| 7648 | CHESLER_BRAIN_HIGHEST_EXPRESSION                           | -0.73 | 0.06 | 0 | 0 | 0 | not significant |
| 7649 | GO_MICROTUBULE_PLUS_END                                    | -0.73 | 0.06 | 0 | 0 | 0 | not significant |
| 7650 | GO_REGULATION_OF_ANDROGEN_RECEPTOR_SIGNALING_PATHWAY       | -0.73 | 0.06 | 0 | 0 | 0 | not significant |
| 7651 | GO_LYSOSOME_LOCALIZATION                                   | -0.73 | 0.04 | 0 | 0 | 0 | not significant |
| 7652 | GO_MICROTUBULE_ORGANIZING_CENTER_ORGANIZATION              | -0.73 | 0.02 | 0 | 0 | 0 | not significant |
| 7653 | GO_NEURON_MIGRATION                                        | -0.73 | 0.02 | 0 | 0 | 0 | not significant |
| 7654 | GO_POST_GOLGI_VESICLE_MEDIATED_TRANSPORT                   | -0.73 | 0.02 | 0 | 0 | 0 | not significant |
| 7655 | GO_UBIQUITIN_BINDING                                       | -0.73 | 0.02 | 0 | 0 | 0 | not significant |
| 7656 | REACTOME_SIGNALING_BY_NTRKS                                | -0.73 | 0.02 | 0 | 0 | 0 | not significant |
| 7657 | GO_REGULATION_OF_MUSCLE_CELL_DIFFERENTIATION               | -0.73 | 0.01 | 0 | 0 | 0 | not significant |
| 7658 | GO_PEPTIDYL_LYSINE_MODIFICATION                            | -0.73 | 0.00 | 0 | 0 | 0 | not significant |
| 7659 | GO_REGULATION_OF_ORGANELLE_ASSEMBLY                        | -0.73 | 0.00 | 0 | 0 | 0 | not significant |
| 7660 | GO_PEPTIDYL_LYSINE_HYDROXYLATION                           | -0.72 | 0.11 | 0 | 0 | 0 | not significant |
| 7661 | DING_LUNG_CANCER_MUTATED_FREQUENTLY                        | -0.72 | 0.10 | 0 | 0 | 0 | not significant |
| 7662 | GO_DEOXYRIBONUCLEOSIDE_TRIPHOSPHATE_BIOSYNTHETIC_PROCESS   | -0.72 | 0.10 | 0 | 0 | 0 | not significant |
| 7663 | GO_HISTONE_METHYLTRANSFERASE_ACTIVITY_H3_K36_SPECIFIC_     | -0.72 | 0.10 | 0 | 0 | 0 | not significant |
| 7664 | GO_POSITIVE_REGULATION_OF_PINOCYTOSIS                      | -0.72 | 0.10 | 0 | 0 | 0 | not significant |
| 7665 | GO_PROTON_TRANSPORTING_V_TYPE_ATPASE_V1_DOMAIN             | -0.72 | 0.10 | 0 | 0 | 0 | not significant |
| 7666 | GO_REGULATION_OF_NEUTROPHIL_DEGRANULATION                  | -0.72 | 0.10 | 0 | 0 | 0 | not significant |
| 7667 | GO_REGULATION_OF_PROTEIN_K63_LINKED_UBIQUITINATION         | -0.72 | 0.10 | 0 | 0 | 0 | not significant |
| 7668 | MYLLYKANGAS_AMPLIFICATION_HOT_SPOT_16                      | -0.72 | 0.10 | 0 | 0 | 0 | not significant |
| 7669 | REACTOME_INTERLEUKIN_35_SIGNALLING                         | -0.72 | 0.10 | 0 | 0 | 0 | not significant |
| 7670 | CHR7P11                                                    | -0.72 | 0.09 | 0 | 0 | 0 | not significant |
| 7671 | GO_CALYX_OF_HELD                                           | -0.72 | 0.09 | 0 | 0 | 0 | not significant |
| 7672 | GO_CILIARY_ROOTLET                                         | -0.72 | 0.09 | 0 | 0 | 0 | not significant |
| 7673 | GO_POLYPEPTIDE_N_ACETYLGALACTOSAMINYLTRANSFERASE_ACTIVIT   | -0.72 | 0.09 | 0 | 0 | 0 | not significant |
| 7674 | GO_PROTEIN_LIPID_COMPLEX_BINDING                           | -0.72 | 0.09 | 0 | 0 | 0 | not significant |
| 7675 | RAFFEL_VEGFA_TARGETS_UP                                    | -0.72 | 0.09 | 0 | 0 | 0 | not significant |
| 7676 | SCHMAHL_PDGF_SIGNALING                                     | -0.72 | 0.09 | 0 | 0 | 0 | not significant |
| 7677 | GO_BLOC_1_COMPLEX                                          | -0.72 | 0.08 | 0 | 0 | 0 | not significant |
| 7678 | GO_HYDROGEN_PEROXIDE_METABOLIC_PROCESS                     | -0.72 | 0.08 | 0 | 0 | 0 | not significant |
| 7679 | GO_REGULATION_OF_NUCLEOTIDE_BIOSYNTHETIC_PROCESS           | -0.72 | 0.08 | 0 | 0 | 0 | not significant |
| 7680 | GO_REGULATION_OF_PROGRAMMED_NECROTIC_CELL_DEATH            | -0.72 | 0.08 | 0 | 0 | 0 | not significant |
| 7681 | REACTOME_SIGNALING_BY_LIGAND_RESPONSIVE_EGFR_VARIANTS_IN_C | -0.72 | 0.08 | 0 | 0 | 0 | not significant |
| 7682 | GO_DNA_POLYMERASE_COMPLEX                                  | -0.72 | 0.07 | 0 | 0 | 0 | not significant |
| 7683 | GO_DNA_REPLICATION_FACTOR_A_COMPLEX                        | -0.72 | 0.07 | 0 | 0 | 0 | not significant |
| 7684 | GO_LATE_ENDOSOME_TO_VACUOLE_TRANSPORT                      | -0.72 | 0.07 | 0 | 0 | 0 | not significant |
| 7685 | GO_MRNA_METHYLATION                                        | -0.72 | 0.07 | 0 | 0 | 0 | not significant |
| 7686 | GO_NEGATIVE_REGULATION_OF_TRANSLATIONAL_INITIATION         | -0.72 | 0.07 | 0 | 0 | 0 | not significant |
| 7687 | GO_REGULATION_OF_PROTEIN_HOMODIMERIZATION_ACTIVITY         | -0.72 | 0.07 | 0 | 0 | 0 | not significant |
| 7688 | REACTOME_SIGNALING_BY_EGFR_IN_CANCER                       | -0.72 | 0.07 | 0 | 0 | 0 | not significant |
| 7689 | REACTOME_TERMINATION_OF_TRANSLESION_DNA_SYNTHESIS          | -0.72 | 0.05 | 0 | 0 | 0 | not significant |
| 7690 | GO_CLATHRIN_COATED_ENDOCYTIC_VESICLE                       | -0.72 | 0.04 | 0 | 0 | 0 | not significant |
| 7691 | GO_METALLOENDOPEPTIDASE_ACTIVITY                           | -0.72 | 0.04 | 0 | 0 | 0 | not significant |
| 7692 | GO_P38MAPK_CASCADE                                         | -0.72 | 0.04 | 0 | 0 | 0 | not significant |
| 7693 | PID_FAS_PATHWAY                                            | -0.72 | 0.04 | 0 | 0 | 0 | not significant |
| 7694 | BYSTROEM_CORRELATED_WITH_IL5_DN                            | -0.72 | 0.03 | 0 | 0 | 0 | not significant |
| 7695 | GO_PHOSPHATIDYLINOSITOL_PHOSPHORYLATION                    | -0.72 | 0.03 | 0 | 0 | 0 | not significant |
| 7696 | GO_ACTIVATION_OF_GTPASE_ACTIVITY                           | -0.72 | 0.02 | 0 | 0 | 0 | not significant |
| 7697 | GO_N_ACETYLTRANSFERASE_ACTIVITY                            | -0.72 | 0.02 | 0 | 0 | 0 | not significant |
| 7698 | GO_PROTEIN_ACETYLTRANSFERASE_COMPLEX                       | -0.72 | 0.02 | 0 | 0 | 0 | not significant |
| 7699 | RB_P130_DN.V1_DN                                           | -0.72 | 0.02 | 0 | 0 | 0 | not significant |
| 7700 | KESHELAVA_MULTIPLE_DRUG_RESISTANCE                         | -0.72 | 0.01 | 0 | 0 | 0 | not significant |
| 7701 | SHAFFER_IRF4_TARGETS_IN_PLASMA_CELL_VS_MATURE_B_LYMPHOCY   | -0.72 | 0.01 | 0 | 0 | 0 | not significant |
| 7702 | GO_NEGATIVE_REGULATION_OF_GLUCOSE_IMPORT                   | -0.71 | 0.10 | 0 | 0 | 0 | not significant |
| 7703 | GO_PENTOSE_PHOSPHATE_SHUNT_NON_OXIDATIVE_BRANCH            | -0.71 | 0.10 | 0 | 0 | 0 | not significant |
| 7704 | GO_REGULATION_OF_ENDOSOME_SIZE                             | -0.71 | 0.10 | 0 | 0 | 0 | not significant |
| 7705 | CHR13Q21                                                   | -0.71 | 0.09 | 0 | 0 | 0 | not significant |
| 7706 | DORN_ADENOVIRUS_INFECTION_24HR_UP                          | -0.71 | 0.09 | 0 | 0 | 0 | not significant |
| 7707 | GO_4_HYDROXYPROLINE_METABOLIC_PROCESS                      | -0.71 | 0.09 | 0 | 0 | 0 | not significant |
| 7708 | GO_BONE_MARROW_DEVELOPMENT                                 | -0.71 | 0.09 | 0 | 0 | 0 | not significant |
| 7709 | GO_CELLULAR_RESPONSE_TO_PROSTAGLANDIN_E_STIMULUS           | -0.71 | 0.09 | 0 | 0 | 0 | not significant |
| 7710 | GO_LOW_DENSITY_LIPOPROTEIN_PARTICLE_RECEPTOR_BIOSYNTHETIC  | -0.71 | 0.09 | 0 | 0 | 0 | not significant |
| 7711 | GO_NEGATIVE_REGULATION_OF_MITOCHONDRIAL_FUSION             | -0.71 | 0.09 | 0 | 0 | 0 | not significant |
| 7712 | GO_NEGATIVE_REGULATION_OF_RESPONSE_TO_EXTRACELLULAR_STIM   | -0.71 | 0.09 | 0 | 0 | 0 | not significant |
| 7713 | GO_PENTOSE_CATABOLIC_PROCESS                               | -0.71 | 0.09 | 0 | 0 | 0 | not significant |
| 7714 | GO_PICLN_SM_PROTEIN_COMPLEX                                | -0.71 | 0.09 | 0 | 0 | 0 | not significant |
| 7715 | BIOCARTA_CTBP1_PATHWAY                                     | -0.71 | 0.08 | 0 | 0 | 0 | not significant |
| 7716 | BIOCARTA_PLCE_PATHWAY                                      | -0.71 | 0.08 | 0 | 0 | 0 | not significant |
| 7717 | GO_CELLULAR_RESPONSE_TO_PROSTAGLANDIN_STIMULUS             | -0.71 | 0.08 | 0 | 0 | 0 | not significant |
| 7718 | OXFORD_RALA_AND_RALB_TARGETS_UP                            | -0.71 | 0.08 | 0 | 0 | 0 | not significant |
| 7719 | PID_BETA_CATENIN_DEG_PATHWAY                               | -0.71 | 0.08 | 0 | 0 | 0 | not significant |
| 7720 | TAKADA_GASTRIC_CANCER_COPY_NUMBER_DN                       | -0.71 | 0.08 | 0 | 0 | 0 | not significant |
| 7721 | CHR3Q12                                                    | -0.71 | 0.07 | 0 | 0 | 0 | not significant |
| 7722 | FLOTHO_PEDIATRIC_ALL_THERAPY_RESPONSE_DN                   | -0.71 | 0.07 | 0 | 0 | 0 | not significant |
| 7723 | GARGALOVIC_RESPONSE_TO_OXIDIZED_PHOSPHOLIPIDS_MAGENTA_DN   | -0.71 | 0.07 | 0 | 0 | 0 | not significant |
| 7724 | GO_C21_STEROID_HORMONE_BIOSYNTHETIC_PROCESS                | -0.71 | 0.07 | 0 | 0 | 0 | not significant |
| 7725 | GO_DOPAMINE_RECEPTOR_BINDING                               | -0.71 | 0.07 | 0 | 0 | 0 | not significant |
| 7726 | GO_EXOCYST                                                 | -0.71 | 0.07 | 0 | 0 | 0 | not significant |
| 7727 | GO_NEGATIVE_REGULATION_OF_NEUROLOGICAL_SYSTEM_PROCESS      | -0.71 | 0.07 | 0 | 0 | 0 | not significant |



|      |                                                            |       |      |   |   |   |                 |
|------|------------------------------------------------------------|-------|------|---|---|---|-----------------|
| 7728 | GO_POLYSACCHARIDE_CATABOLIC_PROCESS                        | -0.71 | 0.07 | 0 | 0 | 0 | not significant |
| 7729 | GO_POSITIVE_REGULATION_OF_CARDIOCYTE_DIFFERENTIATION       | -0.71 | 0.07 | 0 | 0 | 0 | not significant |
| 7730 | GO_TELOMERE_MAINTENANCE_VIA_RECOMBINATION                  | -0.71 | 0.07 | 0 | 0 | 0 | not significant |
| 7731 | JEPSEN_SMRT_TARGETS                                        | -0.71 | 0.07 | 0 | 0 | 0 | not significant |
| 7732 | MUELLER_METHYLATED_IN_GLIOMASTOMA                          | -0.71 | 0.07 | 0 | 0 | 0 | not significant |
| 7733 | GO_AMYLOID_BETA_METABOLIC_PROCESS                          | -0.71 | 0.06 | 0 | 0 | 0 | not significant |
| 7734 | GO_REGULATION_OF_PRESYNAPSE_ORGANIZATION                   | -0.71 | 0.06 | 0 | 0 | 0 | not significant |
| 7735 | GO_ZINC_ION_TRANSPORT                                      | -0.71 | 0.06 | 0 | 0 | 0 | not significant |
| 7736 | ZHENG_IL22_SIGNALING_UP                                    | -0.71 | 0.06 | 0 | 0 | 0 | not significant |
| 7737 | BREDEMEYER_RAG_SIGNALING_VIA_ATM_NOT_VIA_NFKB_DN           | -0.71 | 0.05 | 0 | 0 | 0 | not significant |
| 7738 | GO_DNA_CATABOLIC_PROCESS_ENDONUCLEOLYTIC                   | -0.71 | 0.05 | 0 | 0 | 0 | not significant |
| 7739 | GO_MITOCHONDRION_LOCALIZATION                              | -0.71 | 0.05 | 0 | 0 | 0 | not significant |
| 7740 | GO_RETROMER_COMPLEX                                        | -0.71 | 0.05 | 0 | 0 | 0 | not significant |
| 7741 | CHR14Q22                                                   | -0.71 | 0.04 | 0 | 0 | 0 | not significant |
| 7742 | BCAT_BILD_ET_AL_UP                                         | -0.71 | 0.03 | 0 | 0 | 0 | not significant |
| 7743 | HEDENFALK_BREAST_CANCER_HEREDITARY_VS_SPORADIC             | -0.71 | 0.03 | 0 | 0 | 0 | not significant |
| 7744 | CHR2P23                                                    | -0.71 | 0.02 | 0 | 0 | 0 | not significant |
| 7745 | GO_POSITIVE_REGULATION_OF_PEPTIDYL_SERINE_PHOSPHORYLATION  | -0.71 | 0.02 | 0 | 0 | 0 | not significant |
| 7746 | GO_RNA_POLYMERASE_BINDING                                  | -0.71 | 0.02 | 0 | 0 | 0 | not significant |
| 7747 | GO_SYNAPTIC_VESICLE_LOCALIZATION                           | -0.71 | 0.01 | 0 | 0 | 0 | not significant |
| 7748 | REACTOME_REGULATION_OF_TP53_ACTIVITY_THROUGH_PHOSPHORYL    | -0.71 | 0.01 | 0 | 0 | 0 | not significant |
| 7749 | GO_DNA_REPLICATION                                         | -0.71 | 0.00 | 0 | 0 | 0 | not significant |
| 7750 | GO_LATE_ENDOSOME                                           | -0.71 | 0.00 | 0 | 0 | 0 | not significant |
| 7751 | REACTOME_CHROMATIN_ORGANIZATION                            | -0.71 | 0.00 | 0 | 0 | 0 | not significant |
| 7752 | GO_COPPER_ION_TRANSMEMBRANE_TRANSPORTER_ACTIVITY           | -0.70 | 0.09 | 0 | 0 | 0 | not significant |
| 7753 | GO_DNA_RECOMBINASE_MEDIATOR_COMPLEX                        | -0.70 | 0.09 | 0 | 0 | 0 | not significant |
| 7754 | GO_POSITIVE_REGULATION_OF_TOLL_LIKE_RECEPTOR_2_SIGNALING_F | -0.70 | 0.09 | 0 | 0 | 0 | not significant |
| 7755 | GO_STRESS_GRANULE_DISASSEMBLY                              | -0.70 | 0.09 | 0 | 0 | 0 | not significant |
| 7756 | GO_BETA_CATENIN_DESTRUCTION_COMPLEX_ASSEMBLY               | -0.70 | 0.08 | 0 | 0 | 0 | not significant |
| 7757 | GO_CELLULAR_RESPONSE_TO_TESTOSTERONE_STIMULUS              | -0.70 | 0.08 | 0 | 0 | 0 | not significant |
| 7758 | GO_LENS_MORPHOGENESIS_IN_CAMERA_TYPE_EYE                   | -0.70 | 0.08 | 0 | 0 | 0 | not significant |
| 7759 | GO_POSITIVE_REGULATION_OF_LYASE_ACTIVITY                   | -0.70 | 0.08 | 0 | 0 | 0 | not significant |
| 7760 | GO_POSITIVE_REGULATION_OF_ORGANIC_ACID_TRANSPORT           | -0.70 | 0.08 | 0 | 0 | 0 | not significant |
| 7761 | GO_PROTEIN_LOCALIZATION_TO_NON_MOTILE_CILIUM               | -0.70 | 0.08 | 0 | 0 | 0 | not significant |
| 7762 | GOERING_BLOOD_HDL_CHOLESTEROL_QTL_CIS                      | -0.70 | 0.08 | 0 | 0 | 0 | not significant |
| 7763 | REACTOME_DISEASES_OF_MISMATCH_REPAIR_MMR                   | -0.70 | 0.08 | 0 | 0 | 0 | not significant |
| 7764 | CHEOK_RESPONSE_TO_MERCAPTOPURINE_AND_LD_MTX_UP             | -0.70 | 0.07 | 0 | 0 | 0 | not significant |
| 7765 | FARMER_BREAST_CANCER_CLUSTER_6                             | -0.70 | 0.07 | 0 | 0 | 0 | not significant |
| 7766 | GO_CDP_CHOLINE_PATHWAY                                     | -0.70 | 0.07 | 0 | 0 | 0 | not significant |
| 7767 | GO_EPHRIN_RECEPTOR_BINDING                                 | -0.70 | 0.07 | 0 | 0 | 0 | not significant |
| 7768 | GO_FUCOSE_METABOLIC_PROCESS                                | -0.70 | 0.07 | 0 | 0 | 0 | not significant |
| 7769 | GO_INVADOPODIUM                                            | -0.70 | 0.07 | 0 | 0 | 0 | not significant |
| 7770 | GO_PHARYNGEAL_ARCH_ARTERY_MORPHOGENESIS                    | -0.70 | 0.07 | 0 | 0 | 0 | not significant |
| 7771 | GO_SODIUM_ION_IMPORT_ACROSS_PLASMA_MEMBRANE                | -0.70 | 0.07 | 0 | 0 | 0 | not significant |
| 7772 | GO_BLASTOCYST_GROWTH                                       | -0.70 | 0.06 | 0 | 0 | 0 | not significant |
| 7773 | GO_NEGATIVE_REGULATION_OF_HISTONE_H3_K9_METHYLATION        | -0.70 | 0.06 | 0 | 0 | 0 | not significant |
| 7774 | GO_NEUROTROPHIN_RECEPTOR_BINDING                           | -0.70 | 0.06 | 0 | 0 | 0 | not significant |
| 7775 | GO_REGULATION_OF_DNA_DAMAGE_CHECKPOINT                     | -0.70 | 0.06 | 0 | 0 | 0 | not significant |
| 7776 | PID_HNF3A_PATHWAY                                          | -0.70 | 0.06 | 0 | 0 | 0 | not significant |
| 7777 | BIOCARTA_CASPASE_PATHWAY                                   | -0.70 | 0.05 | 0 | 0 | 0 | not significant |
| 7778 | GO_REGULATION_OF_MYOTUBE_DIFFERENTIATION                   | -0.70 | 0.05 | 0 | 0 | 0 | not significant |
| 7779 | ISSAeva_MLL2_TARGETS                                       | -0.70 | 0.05 | 0 | 0 | 0 | not significant |
| 7780 | PID_NEPHRIN_NEPHI_PATHWAY                                  | -0.70 | 0.05 | 0 | 0 | 0 | not significant |
| 7781 | GO_EMBRYO_IMPLANTATION                                     | -0.70 | 0.04 | 0 | 0 | 0 | not significant |
| 7782 | REACTOME_TRAF6_MEDIATED_NF_KB_ACTIVATION                   | -0.70 | 0.04 | 0 | 0 | 0 | not significant |
| 7783 | GO_MEDIATOR_COMPLEX                                        | -0.70 | 0.03 | 0 | 0 | 0 | not significant |
| 7784 | GO_NEGATIVE_REGULATION_OF_PEPTIDYL_TYROSINE_PHOSPHORYLAT   | -0.70 | 0.03 | 0 | 0 | 0 | not significant |
| 7785 | GO_REGULATION_OF_MITOCHONDRIAL_MEMBRANE_PERMEABILITY_INV   | -0.70 | 0.03 | 0 | 0 | 0 | not significant |
| 7786 | REACTOME_ACTIVATION_OF_ATR_IN_RESPONSE_TO_REPLICATION_STF  | -0.70 | 0.03 | 0 | 0 | 0 | not significant |
| 7787 | SIG_BCR_SIGNALING_PATHWAY                                  | -0.70 | 0.03 | 0 | 0 | 0 | not significant |
| 7788 | GO_DENDRITIC_SPINE_DEVELOPMENT                             | -0.70 | 0.02 | 0 | 0 | 0 | not significant |
| 7789 | GO_IRON_ION_HOMEOSTASIS                                    | -0.70 | 0.02 | 0 | 0 | 0 | not significant |
| 7790 | GO_HIGH_DENSITY_LIPOPROTEIN_PARTICLE_CLEARANCE             | -0.69 | 0.09 | 0 | 0 | 0 | not significant |
| 7791 | GO_NEUROTROPHIN_TRK_RECEPTOR_BINDING                       | -0.69 | 0.09 | 0 | 0 | 0 | not significant |
| 7792 | REACTOME_TIGHT_JUNCTION_INTERACTIONS                       | -0.69 | 0.09 | 0 | 0 | 0 | not significant |
| 7793 | GO_CDC73_PAF1_COMPLEX                                      | -0.69 | 0.08 | 0 | 0 | 0 | not significant |
| 7794 | GO_ENDONUCLEOLYTIC_CLEAVAGE_IN ITS1 TO SEPARATE SSU RRNA   | -0.69 | 0.08 | 0 | 0 | 0 | not significant |
| 7795 | GO_HISTONE_H3_K9_DIMETHYLATION                             | -0.69 | 0.08 | 0 | 0 | 0 | not significant |
| 7796 | GO_REGULATION_OF_ODONTOGENESIS                             | -0.69 | 0.08 | 0 | 0 | 0 | not significant |
| 7797 | GO_TOLL_LIKE_RECEPTOR_2_SIGNALING_PATHWAY                  | -0.69 | 0.08 | 0 | 0 | 0 | not significant |
| 7798 | GO_XYLULOSE_5_PHOSPHATE_BIOSYNTHETIC_PROCESS               | -0.69 | 0.08 | 0 | 0 | 0 | not significant |
| 7799 | MIKKELSEN_PLURIPOTENT_STATE_UP                             | -0.69 | 0.08 | 0 | 0 | 0 | not significant |
| 7800 | REACTOME_REGULATION_OF_PTEN_LOCALIZATION                   | -0.69 | 0.08 | 0 | 0 | 0 | not significant |
| 7801 | GO_NEGATIVE_REGULATION_OF_JUN_KINASE_ACTIVITY              | -0.69 | 0.07 | 0 | 0 | 0 | not significant |
| 7802 | GO_OLIGOSACCHARYL_TRANSFERASE_ACTIVITY                     | -0.69 | 0.07 | 0 | 0 | 0 | not significant |
| 7803 | GO_REGULATION_OF_SMAD_PROTEIN_SIGNAL_TRANSDUCTION          | -0.69 | 0.07 | 0 | 0 | 0 | not significant |
| 7804 | GO_SEQUESTERING_OF_TRIGLYCERIDE                            | -0.69 | 0.07 | 0 | 0 | 0 | not significant |
| 7805 | GO_SOMATIC_DIVERSIFICATION_OF_T_CELL_RECEPTOR_GENES        | -0.69 | 0.07 | 0 | 0 | 0 | not significant |
| 7806 | WU_ALZHEIMER_DISEASE_DN                                    | -0.69 | 0.07 | 0 | 0 | 0 | not significant |
| 7807 | CHR18Q22                                                   | -0.69 | 0.06 | 0 | 0 | 0 | not significant |
| 7808 | GO_PIGMENT_GRANULE_LOCALIZATION                            | -0.69 | 0.06 | 0 | 0 | 0 | not significant |
| 7809 | GO_PLATELET_DENSE_GRANULE                                  | -0.69 | 0.06 | 0 | 0 | 0 | not significant |
| 7810 | GO_REGULATION_OF_AUTOPHAGOSOME_MATURATION                  | -0.69 | 0.06 | 0 | 0 | 0 | not significant |
| 7811 | LU_TUMOR_VASCULATURE_UP                                    | -0.69 | 0.06 | 0 | 0 | 0 | not significant |
| 7812 | REACTOME_TGF_BETA_RECEPTOR_SIGNALING_IN_EMT_EPITHELIAL_TC  | -0.69 | 0.06 | 0 | 0 | 0 | not significant |
| 7813 | GO_CARBOXYPEPTIDASE_ACTIVITY                               | -0.69 | 0.05 | 0 | 0 | 0 | not significant |
| 7814 | GO_POSITIVE_REGULATION_OF_NEUROBLAST_PROLIFERATION         | -0.69 | 0.05 | 0 | 0 | 0 | not significant |
| 7815 | CHR20P12                                                   | -0.69 | 0.04 | 0 | 0 | 0 | not significant |
| 7816 | GO_NUCLEAR_HETEROCHROMATIN                                 | -0.69 | 0.04 | 0 | 0 | 0 | not significant |
| 7817 | GO_REGULATION_OF_FATTY_ACID_METABOLIC_PROCESS              | -0.69 | 0.04 | 0 | 0 | 0 | not significant |
| 7818 | GO_AP_TYPE_MEMBRANE_COAT_ADAPTOR_COMPLEX                   | -0.69 | 0.03 | 0 | 0 | 0 | not significant |
| 7819 | GO_MITOCHONDRIAL_OUTER_MEMBRANE_PERMEABILIZATION           | -0.69 | 0.03 | 0 | 0 | 0 | not significant |
| 7820 | GO_POSITIVE_REGULATION_OF_NUCLEOCYTOPLASMIC_TRANSPORT      | -0.69 | 0.02 | 0 | 0 | 0 | not significant |
| 7821 | GO_REGULATION_OF_HISTONE_MODIFICATION                      | -0.69 | 0.01 | 0 | 0 | 0 | not significant |
| 7822 | GO_REGULATION_OF_POSTSYNAPSE_ORGANIZATION                  | -0.69 | 0.01 | 0 | 0 | 0 | not significant |
| 7823 | GO_INTRACELLULAR_STEROID_HORMONE_RECEPTOR_SIGNALING_PATI   | -0.69 | 0.00 | 0 | 0 | 0 | not significant |
| 7824 | GO_NEGATIVE_REGULATION_OF_NEURON_DEATH                     | -0.69 | 0.00 | 0 | 0 | 0 | not significant |
| 7825 | GO_NUCLEAR_HORMONE_RECEPTOR_BINDING                        | -0.69 | 0.00 | 0 | 0 | 0 | not significant |
| 7826 | GO_RAB_GTPASE_BINDING                                      | -0.69 | 0.00 | 0 | 0 | 0 | not significant |
| 7827 | REACTOME_REGULATION_OF_TP53_ACTIVITY                       | -0.69 | 0.00 | 0 | 0 | 0 | not significant |
| 7828 | ITO_PTTG1_TARGETS_UP                                       | -0.68 | 0.09 | 0 | 0 | 0 | not significant |
| 7829 | REACTOME_FORMATION_OF_XYLULOSE_5_PHOSPHATE                 | -0.68 | 0.08 | 0 | 0 | 0 | not significant |
| 7830 | CHR8P22                                                    | -0.68 | 0.07 | 0 | 0 | 0 | not significant |
| 7831 | GO_ATG1_ULK1_KINASE_COMPLEX                                | -0.68 | 0.07 | 0 | 0 | 0 | not significant |
| 7832 | GO_ER_ASSOCIATED_MISFOLEDDED_PROTEIN_CATABOLIC_PROCESS     | -0.68 | 0.07 | 0 | 0 | 0 | not significant |
| 7833 | GO_ESCRT_COMPLEX_DISASSEMBLY                               | -0.68 | 0.07 | 0 | 0 | 0 | not significant |
| 7834 | GO_MITOCHONDRIAL_DNA_REPAIR                                | -0.68 | 0.07 | 0 | 0 | 0 | not significant |
| 7835 | GO_NEUROTRANSMITTER_CATABOLIC_PROCESS                      | -0.68 | 0.07 | 0 | 0 | 0 | not significant |
| 7836 | GO_NODE_OF_RANVIER                                         | -0.68 | 0.07 | 0 | 0 | 0 | not significant |

|      |                                                            |       |      |   |   |   |                 |
|------|------------------------------------------------------------|-------|------|---|---|---|-----------------|
| 7837 | GO_PHAGOLYSOSOME_ASSEMBLY                                  | -0.68 | 0.07 | 0 | 0 | 0 | not significant |
| 7838 | GO_PROLINE_RICH_REGION_BINDING                             | -0.68 | 0.07 | 0 | 0 | 0 | not significant |
| 7839 | GO_RESPONSE_TO_MACROPHAGE_COLONY_STIMULATING_FACTOR        | -0.68 | 0.07 | 0 | 0 | 0 | not significant |
| 7840 | GO_TRNA_TRANSCRIPTION                                      | -0.68 | 0.07 | 0 | 0 | 0 | not significant |
| 7841 | TERAMOTO_OPN_TARGETS_CLUSTER_4                             | -0.68 | 0.07 | 0 | 0 | 0 | not significant |
| 7842 | CHR18Q23                                                   | -0.68 | 0.06 | 0 | 0 | 0 | not significant |
| 7843 | GO_RNA_POLYMERASE_I_REGULATORY_REGION_DNA_BINDING          | -0.68 | 0.06 | 0 | 0 | 0 | not significant |
| 7844 | GO_VASCULAR_SMOOTH_MUSCLE_CELL_DIFFERENTIATION             | -0.68 | 0.06 | 0 | 0 | 0 | not significant |
| 7845 | HEIDENBLAD_AMPLIFIED_IN_SOFT_TISSUE_CANCER                 | -0.68 | 0.06 | 0 | 0 | 0 | not significant |
| 7846 | BENPORATH_ES_2                                             | -0.68 | 0.05 | 0 | 0 | 0 | not significant |
| 7847 | GO_MYOTUBE_CELL_DEVELOPMENT                                | -0.68 | 0.05 | 0 | 0 | 0 | not significant |
| 7848 | GO_PHOTOTRANSDUCTION_VISIBLE_LIGHT                         | -0.68 | 0.05 | 0 | 0 | 0 | not significant |
| 7849 | GO_PROTEIN_NEDDYLATION                                     | -0.68 | 0.05 | 0 | 0 | 0 | not significant |
| 7850 | HOEGERKORP_CD44_TARGETS_DIRECT_UP                          | -0.68 | 0.05 | 0 | 0 | 0 | not significant |
| 7851 | WOOD_EBV_EBNA1_TARGETS_DN                                  | -0.68 | 0.05 | 0 | 0 | 0 | not significant |
| 7852 | BIOCARTA_ALK_PATHWAY                                       | -0.68 | 0.04 | 0 | 0 | 0 | not significant |
| 7853 | BIOCARTA_IL1R_PATHWAY                                      | -0.68 | 0.04 | 0 | 0 | 0 | not significant |
| 7854 | CHANGOLKAR_H2AFY_TARGETS_DN                                | -0.68 | 0.04 | 0 | 0 | 0 | not significant |
| 7855 | GO_NEGATIVE_REGULATION_OF_EXTRINSIC_APOPTOTIC_SIGNALING_PF | -0.68 | 0.04 | 0 | 0 | 0 | not significant |
| 7856 | GO_NUCLEAR_TRANSCRIBED_MRNA_POLY_A_TAIL_SHORTENING         | -0.68 | 0.04 | 0 | 0 | 0 | not significant |
| 7857 | HASLINGER_B_CLL_WITH_11Q23_DELETION                        | -0.68 | 0.04 | 0 | 0 | 0 | not significant |
| 7858 | GO_AMYLOID_PRECURSOR_PROTEIN_METABOLIC_PROCESS             | -0.68 | 0.03 | 0 | 0 | 0 | not significant |
| 7859 | GO_MISMATCH_REPAIR                                         | -0.68 | 0.03 | 0 | 0 | 0 | not significant |
| 7860 | GO_WATER_HOMEOSTASIS                                       | -0.68 | 0.03 | 0 | 0 | 0 | not significant |
| 7861 | KEGG_INOSITOL_PHOSPHATE_METABOLISM                         | -0.68 | 0.03 | 0 | 0 | 0 | not significant |
| 7862 | REACTOME_DNA_DAMAGE_BYPASS                                 | -0.68 | 0.02 | 0 | 0 | 0 | not significant |
| 7863 | GO_FILOPODIUM                                              | -0.68 | 0.01 | 0 | 0 | 0 | not significant |
| 7864 | GO_PROTEIN_METHYLATION                                     | -0.68 | 0.00 | 0 | 0 | 0 | not significant |
| 7865 | GO_VESICLE_MEDIATED_TRANSPORT_IN_SYNAPSE                   | -0.68 | 0.00 | 0 | 0 | 0 | not significant |
| 7866 | REACTOME_MEIOSIS                                           | -0.68 | 0.00 | 0 | 0 | 0 | not significant |
| 7867 | REACTOME_VITAMIN_C_ASCORBATE_METABOLISM                    | -0.67 | 0.09 | 0 | 0 | 0 | not significant |
| 7868 | GO_REGULATION_OF_HISTONE_H2B_UBIQUITINATION                | -0.67 | 0.08 | 0 | 0 | 0 | not significant |
| 7869 | GO_SATELLITE_DNA_BINDING                                   | -0.67 | 0.08 | 0 | 0 | 0 | not significant |
| 7870 | FUJIMURA_PARK2_HEPATOCYTE_PROLIFERATION_DN                 | -0.67 | 0.07 | 0 | 0 | 0 | not significant |
| 7871 | GO_DEOXYRIBONUCLEOSIDE_TRIPHOSPHATE_CATABOLIC_PROCESS      | -0.67 | 0.07 | 0 | 0 | 0 | not significant |
| 7872 | GO_NEGATIVE_REGULATION_OF_KIDNEY_DEVELOPMENT               | -0.67 | 0.07 | 0 | 0 | 0 | not significant |
| 7873 | GO_POSITIVE_REGULATION_OF_INTRACELLULAR_ESTROGEN_RECEPTC   | -0.67 | 0.07 | 0 | 0 | 0 | not significant |
| 7874 | GO_PROTEIN_DESUMOYLATION                                   | -0.67 | 0.07 | 0 | 0 | 0 | not significant |
| 7875 | GO_REGULATION_OF_BROWN_FAT_CELL_DIFFERENTIATION            | -0.67 | 0.07 | 0 | 0 | 0 | not significant |
| 7876 | GO_REGULATION_OF_GLUCCONEOGENESIS_BY_REGULATION_OF_TRAN    | -0.67 | 0.07 | 0 | 0 | 0 | not significant |
| 7877 | GO_SNRNA_TRANSCRIPTION_BY_RNA_POLYMERASE_III               | -0.67 | 0.07 | 0 | 0 | 0 | not significant |
| 7878 | REACTOME_SODIUM_CALCIIUM_EXCHANGERS                        | -0.67 | 0.07 | 0 | 0 | 0 | not significant |
| 7879 | GO_POSITIVE_REGULATION_OF_ACTIN_CYTOSKELETON_REORGANIZAT   | -0.67 | 0.06 | 0 | 0 | 0 | not significant |
| 7880 | GO_S_ADENOSYLMETHIONINE_METABOLIC_PROCESS                  | -0.67 | 0.06 | 0 | 0 | 0 | not significant |
| 7881 | GO_STAGA_COMPLEX                                           | -0.67 | 0.06 | 0 | 0 | 0 | not significant |
| 7882 | REACTOME_MAPK3_ERK1_ACTIVATION                             | -0.67 | 0.06 | 0 | 0 | 0 | not significant |
| 7883 | REACTOME_WNT5A_DEPENDENT_INTERNALIZATION_OF_FZD2_FZD5_AN   | -0.67 | 0.06 | 0 | 0 | 0 | not significant |
| 7884 | WOTTON_RUNX_TARGETS_UP                                     | -0.67 | 0.06 | 0 | 0 | 0 | not significant |
| 7885 | FRIDMAN_IMMORTALIZATION_DN                                 | -0.67 | 0.05 | 0 | 0 | 0 | not significant |
| 7886 | GO_3_UTR_MEDIATED_MRNA_DESTABILIZATION                     | -0.67 | 0.05 | 0 | 0 | 0 | not significant |
| 7887 | GO_LYSINE_ACETYLATED_HISTONE_BINDING                       | -0.67 | 0.05 | 0 | 0 | 0 | not significant |
| 7888 | GO_NUCLEAR_EUCHROMATIN                                     | -0.67 | 0.05 | 0 | 0 | 0 | not significant |
| 7889 | GO_REGULATION_OF_NUCLEAR_TRANSCRIBED_MRNA_CATABOLIC_PRC    | -0.67 | 0.05 | 0 | 0 | 0 | not significant |
| 7890 | OUYANG_PROSTATE_CANCER_PROGRESSION_UP                      | -0.67 | 0.05 | 0 | 0 | 0 | not significant |
| 7891 | WALLACE_JAK2_TARGETS_UP                                    | -0.67 | 0.05 | 0 | 0 | 0 | not significant |
| 7892 | CHR10Q41                                                   | -0.67 | 0.04 | 0 | 0 | 0 | not significant |
| 7893 | GO_LONG_TERM_MEMORY                                        | -0.67 | 0.04 | 0 | 0 | 0 | not significant |
| 7894 | STEIN_ESRRA_TARGETS_RESPONSIVE_TO_ESTROGEN_UP              | -0.67 | 0.04 | 0 | 0 | 0 | not significant |
| 7895 | GO_AXON_REGENERATION                                       | -0.67 | 0.03 | 0 | 0 | 0 | not significant |
| 7896 | GO_DNA_REPLICATION_ORIGIN_BINDING                          | -0.67 | 0.03 | 0 | 0 | 0 | not significant |
| 7897 | REACTOME_RESOLUTION_OF_AP_SITES_VIA_THE_MULTIPLE_NUCLEOTI  | -0.67 | 0.03 | 0 | 0 | 0 | not significant |
| 7898 | GO_MICROTUBULE_POLYMERIZATION_OR_DEPOLYMERIZATION          | -0.67 | 0.01 | 0 | 0 | 0 | not significant |
| 7899 | TURASHVILI_BREAST_NORMAL_DUCTAL_VS_LOBULAR_UP              | -0.67 | 0.01 | 0 | 0 | 0 | not significant |
| 7900 | GO_CYTOSOLIC_TRANSPORT                                     | -0.67 | 0.00 | 0 | 0 | 0 | not significant |
| 7901 | GO_METHYLTRANSFERASE_COMPLEX                               | -0.67 | 0.00 | 0 | 0 | 0 | not significant |
| 7902 | GO_REGULATION_OF_PROTEIN_MONOUBIQUITINATION                | -0.66 | 0.08 | 0 | 0 | 0 | not significant |
| 7903 | GO_INDOLE_CONTAINING_COMPOUND_METABOLIC_PROCESS            | -0.66 | 0.07 | 0 | 0 | 0 | not significant |
| 7904 | GO_SKELETAL_MYOFIBRIL_ASSEMBLY                             | -0.66 | 0.07 | 0 | 0 | 0 | not significant |
| 7905 | GO_MAINTENANCE_OF_DNA_METHYLATION                          | -0.66 | 0.06 | 0 | 0 | 0 | not significant |
| 7906 | GO_PHOSPHORYLATED_CARBOHYDRATE_DEPHOSPHORYLATION           | -0.66 | 0.06 | 0 | 0 | 0 | not significant |
| 7907 | GO_REGULATION_OF_TRANSLATION_AT_SYNAPSE_MODULATING_SYNAP   | -0.66 | 0.06 | 0 | 0 | 0 | not significant |
| 7908 | GO_SECRETORY_GNANULE_LOCALIZATION                          | -0.66 | 0.06 | 0 | 0 | 0 | not significant |
| 7909 | GO_CELLULAR_RESPONSE_TO_PH                                 | -0.66 | 0.05 | 0 | 0 | 0 | not significant |
| 7910 | GO_CHROMATIN_SILENCING_AT_TELOMERE                         | -0.66 | 0.05 | 0 | 0 | 0 | not significant |
| 7911 | GO_GOLGI_DISASSEMBLY                                       | -0.66 | 0.05 | 0 | 0 | 0 | not significant |
| 7912 | GO_NEGATIVE_REGULATION_OF_STEROID_METABOLIC_PROCESS        | -0.66 | 0.05 | 0 | 0 | 0 | not significant |
| 7913 | GO_POSITIVE_REGULATION_OF_HISTONE_H3_K4_METHYLATION        | -0.66 | 0.05 | 0 | 0 | 0 | not significant |
| 7914 | GO_PROTEIN_KINASE_B_BINDING                                | -0.66 | 0.05 | 0 | 0 | 0 | not significant |
| 7915 | GO_PYRIMIDINE_RIBONUCLEOSIDE_TRIPHOSPHATE_BIOSYNTHETIC_PRO | -0.66 | 0.05 | 0 | 0 | 0 | not significant |
| 7916 | HUMMERICH_BENIGN_SKIN_TUMOR_UP                             | -0.66 | 0.05 | 0 | 0 | 0 | not significant |
| 7917 | AMIT_SERUM_RESPONSE_40_MCF10A                              | -0.66 | 0.04 | 0 | 0 | 0 | not significant |
| 7918 | GO_GALACTOSYLTRANSFERASE_ACTIVITY                          | -0.66 | 0.04 | 0 | 0 | 0 | not significant |
| 7919 | GO_PHOSPHATIDYLINOSITOL_DEPHOSPHORYLATION                  | -0.66 | 0.04 | 0 | 0 | 0 | not significant |
| 7920 | GO_POSITIVE_REGULATION_OF_POSTTRANSCRIPTIONAL_GENE_SILENC  | -0.66 | 0.04 | 0 | 0 | 0 | not significant |
| 7921 | GO_PROTEIN_HYDROXYLATION                                   | -0.66 | 0.04 | 0 | 0 | 0 | not significant |
| 7922 | GO_SMOOTH_MUSCLE_CELL_APOPTOTIC_PROCESS                    | -0.66 | 0.04 | 0 | 0 | 0 | not significant |
| 7923 | PID_IL1_PATHWAY                                            | -0.66 | 0.04 | 0 | 0 | 0 | not significant |
| 7924 | REACTOME_PCNA_DEPENDENT_LONG_PATCH_BASE_EXCISION_REPAIR    | -0.66 | 0.04 | 0 | 0 | 0 | not significant |
| 7925 | REACTOME_TICAM1_RIP1_MEDIATED_IKK_COMPLEX_RECRUITMENT      | -0.66 | 0.04 | 0 | 0 | 0 | not significant |
| 7926 | REACTOME_TRAF6_MEDIATED_IRF7_ACTIVATION                    | -0.66 | 0.04 | 0 | 0 | 0 | not significant |
| 7927 | KEGG_ALDOSTERONE_REGULATED_SODIUM_REABSORPTION             | -0.66 | 0.03 | 0 | 0 | 0 | not significant |
| 7928 | REACTOME_ENERGY_DEPENDENT_REGULATION_OF_MTOR_BY_LKB1_A     | -0.66 | 0.03 | 0 | 0 | 0 | not significant |
| 7929 | SIMBULAN_UV_RESPONSE_IMMORTALIZED_DN                       | -0.66 | 0.03 | 0 | 0 | 0 | not significant |
| 7930 | ZEMBUTSU_SENSITIVITY_TO_METHOTREXATE                       | -0.66 | 0.03 | 0 | 0 | 0 | not significant |
| 7931 | GO_TRANSCRIPTION_ELONGATION_FACTOR_COMPLEX                 | -0.66 | 0.02 | 0 | 0 | 0 | not significant |
| 7932 | PID_ATM_PATHWAY                                            | -0.66 | 0.02 | 0 | 0 | 0 | not significant |
| 7933 | GO_REGULATION_OF_MAINTENANCE_OF_SISTER_CHROMATID_COHESIC   | -0.65 | 0.08 | 0 | 0 | 0 | not significant |
| 7934 | GO_INSULIN_BINDING                                         | -0.65 | 0.06 | 0 | 0 | 0 | not significant |
| 7935 | GO_METHIONINE_BIOSYNTHETIC_PROCESS                         | -0.65 | 0.06 | 0 | 0 | 0 | not significant |
| 7936 | GO_NEGATIVE_REGULATION_OF_HISTONE_H3_K4_METHYLATION        | -0.65 | 0.06 | 0 | 0 | 0 | not significant |
| 7937 | GO_NEGATIVE_REGULATION_OF_MICROTUBULE_POLYMERIZATION       | -0.65 | 0.06 | 0 | 0 | 0 | not significant |
| 7938 | GO_REGULATION_OF_PHOSPHATIDYLINOSITOL_DEPHOSPHORYLATION    | -0.65 | 0.06 | 0 | 0 | 0 | not significant |
| 7939 | GO_SPHINGOMYELIN_BIOSYNTHETIC_PROCESS                      | -0.65 | 0.06 | 0 | 0 | 0 | not significant |
| 7940 | REACTOME_FRS2_MEDIATED_ACTIVATION                          | -0.65 | 0.06 | 0 | 0 | 0 | not significant |
| 7941 | GO_INTERLEUKIN_6_BIOSYNTHETIC_PROCESS                      | -0.65 | 0.05 | 0 | 0 | 0 | not significant |
| 7942 | GO_LATE_ENDOSOME_TO_VACUOLE_TRANSPORT_VIA_MULTIVESICULAR   | -0.65 | 0.05 | 0 | 0 | 0 | not significant |
| 7943 | GO_MONOUBIQUITINATED_PROTEIN_DEUBIQUITINATION              | -0.65 | 0.05 | 0 | 0 | 0 | not significant |
| 7944 | GO_POSITIVE_REGULATION_OF_STRIATED_MUSCLE_CONTRACTION      | -0.65 | 0.05 | 0 | 0 | 0 | not significant |
| 7945 | GO_CHROMATIN_DISASSEMBLY                                   | -0.65 | 0.04 | 0 | 0 | 0 | not significant |

|      |                                                            |       |      |   |   |   |                 |
|------|------------------------------------------------------------|-------|------|---|---|---|-----------------|
| 7946 | GO_CLATHRIN_COAT_ASSEMBLY                                  | -0.65 | 0.04 | 0 | 0 | 0 | not significant |
| 7947 | GO_DEOXYRIBONUCLEOTIDE_BIOSYNTHETIC_PROCESS                | -0.65 | 0.04 | 0 | 0 | 0 | not significant |
| 7948 | GO_ESCRT_III_COMPLEX                                       | -0.65 | 0.04 | 0 | 0 | 0 | not significant |
| 7949 | GO_FILOPODIUM_MEMBRANE                                     | -0.65 | 0.04 | 0 | 0 | 0 | not significant |
| 7950 | GO_MICROTUBULE_PLUS_END_BINDING                            | -0.65 | 0.03 | 0 | 0 | 0 | not significant |
| 7951 | GO_RESPONSE_TO_CATECHOLAMINE                               | -0.65 | 0.03 | 0 | 0 | 0 | not significant |
| 7952 | GO_SOLUTE_PROTON_ANTIPORTER_ACTIVITY                       | -0.65 | 0.03 | 0 | 0 | 0 | not significant |
| 7953 | NUNODA_RESPONSE_TO_DASATINIB_IMATINIB_UP                   | -0.65 | 0.03 | 0 | 0 | 0 | not significant |
| 7954 | PID_AMB2_NEUTROPHILS_PATHWAY                               | -0.65 | 0.03 | 0 | 0 | 0 | not significant |
| 7955 | TAVOR_CEBPA_TARGETS_DN                                     | -0.65 | 0.03 | 0 | 0 | 0 | not significant |
| 7956 | GO_MITOCHONDRIAL_FISSION                                   | -0.65 | 0.02 | 0 | 0 | 0 | not significant |
| 7957 | GO_NF_KAPPAB_BINDING                                       | -0.65 | 0.02 | 0 | 0 | 0 | not significant |
| 7958 | PID_REELIN_PATHWAY                                         | -0.65 | 0.02 | 0 | 0 | 0 | not significant |
| 7959 | GAZDA_DIAMOND_BLACKFAN_ANEMIA_PROGENITOR_DN                | -0.65 | 0.01 | 0 | 0 | 0 | not significant |
| 7960 | GO_ORGANELLE_TRANSPORT_ALONG_MICROTUBULE                   | -0.65 | 0.01 | 0 | 0 | 0 | not significant |
| 7961 | GO_PIGMENTATION                                            | -0.65 | 0.01 | 0 | 0 | 0 | not significant |
| 7962 | DAZARD_RESPONSE_TO_UV_NHEK_DN                              | -0.65 | 0.00 | 0 | 0 | 0 | not significant |
| 7963 | REACTOME_PHOSPHOLIPID_METABOLISM                           | -0.65 | 0.00 | 0 | 0 | 0 | not significant |
| 7964 | GO_NEGATIVE_REGULATION_OF_INTERLEUKIN_12_PRODUCTION        | -0.64 | 0.06 | 0 | 0 | 0 | not significant |
| 7965 | GO_PHOSPHATE_ION_TRANSMEMBRANE_TRANSPORTER_ACTIVITY        | -0.64 | 0.06 | 0 | 0 | 0 | not significant |
| 7966 | GO_REGULATION_OF_RIBONUCLEOPROTEIN_COMPLEX_LOCALIZATION    | -0.64 | 0.06 | 0 | 0 | 0 | not significant |
| 7967 | GO_ENDOPLASMIC_RETICULUM_LOCALIZATION                      | -0.64 | 0.05 | 0 | 0 | 0 | not significant |
| 7968 | GO_NEGATIVE_REGULATION_OF_SMOOTH_MUSCLE_CONTRACTION        | -0.64 | 0.05 | 0 | 0 | 0 | not significant |
| 7969 | GO_NEGATIVE_REGULATION_OF_TYROSINE_PHOSPHORYLATION_OF_S1   | -0.64 | 0.05 | 0 | 0 | 0 | not significant |
| 7970 | GO_POSITIVE_REGULATION_OF_RESPONSE_TO_REACTIVE_OXYGEN_SF   | -0.64 | 0.05 | 0 | 0 | 0 | not significant |
| 7971 | GO_ZINC_ION_IMPORT_ACROSS_PLASMA_MEMBRANE                  | -0.64 | 0.05 | 0 | 0 | 0 | not significant |
| 7972 | GO_ZYMOGEN_GRANULE                                         | -0.64 | 0.05 | 0 | 0 | 0 | not significant |
| 7973 | HUMMERICH_MALIGNANT_SKIN_TUMOR_DN                          | -0.64 | 0.05 | 0 | 0 | 0 | not significant |
| 7974 | REACTOME_FORMATION_OF_FIBRIN_CLOT_CLOTTING_CASCADE         | -0.64 | 0.05 | 0 | 0 | 0 | not significant |
| 7975 | FIGUEROA_AML_METHYLATION_CLUSTER_6_DN                      | -0.64 | 0.04 | 0 | 0 | 0 | not significant |
| 7976 | GO_CELLULAR_RESPONSE_TO_VITAMIN_D                          | -0.64 | 0.04 | 0 | 0 | 0 | not significant |
| 7977 | GO_EPITHELIAL_CELL_MORPHOGENESIS                           | -0.64 | 0.04 | 0 | 0 | 0 | not significant |
| 7978 | GO_G_RICH_STRAND_TELOMERIC_DNA_BINDING                     | -0.64 | 0.04 | 0 | 0 | 0 | not significant |
| 7979 | GO_NEGATIVE_REGULATION_OF_CIRCADIAN_RHYTHM                 | -0.64 | 0.04 | 0 | 0 | 0 | not significant |
| 7980 | GO_POSITIVE_REGULATION_OF_EPIDERMAL_CELL_DIFFERENTIATION   | -0.64 | 0.04 | 0 | 0 | 0 | not significant |
| 7981 | GO_SRP_DEPENDENT_COTRANSLATIONAL_PROTEIN_TARGETING_TO_M    | -0.64 | 0.04 | 0 | 0 | 0 | not significant |
| 7982 | GO_VITAMIN_D_RECEPTOR_BINDING                              | -0.64 | 0.04 | 0 | 0 | 0 | not significant |
| 7983 | GO_ACTIN_CORTICAL_PATCH                                    | -0.64 | 0.03 | 0 | 0 | 0 | not significant |
| 7984 | GO_RESPONSE_TO_MISFOLDED_PROTEIN                           | -0.64 | 0.03 | 0 | 0 | 0 | not significant |
| 7985 | REACTOME_AKT_PHOSPHORYLATES_TARGETS_IN_THE_CYTOSOL         | -0.64 | 0.03 | 0 | 0 | 0 | not significant |
| 7986 | CHR14Q23                                                   | -0.64 | 0.02 | 0 | 0 | 0 | not significant |
| 7987 | GO_PHOSPHATIDIC_ACID_BIOSYNTHETIC_PROCESS                  | -0.64 | 0.02 | 0 | 0 | 0 | not significant |
| 7988 | GARGALOVIC_RESPONSE_TO_OXIDIZED_PHOSPHOLIPIDS_BLACK_UP     | -0.64 | 0.01 | 0 | 0 | 0 | not significant |
| 7989 | REACTOME_TRANSCRIPTIONAL_REGULATION_BY_MECP2               | -0.64 | 0.01 | 0 | 0 | 0 | not significant |
| 7990 | GO_REPLICATION_FORK                                        | -0.64 | 0.00 | 0 | 0 | 0 | not significant |
| 7991 | GO_DEATH_INDUCING_SIGNALING_COMPLEX_ASSEMBLY               | -0.63 | 0.06 | 0 | 0 | 0 | not significant |
| 7992 | GO_NEGATIVE_REGULATION_OF_MYELINATION                      | -0.63 | 0.06 | 0 | 0 | 0 | not significant |
| 7993 | GO_POSITIVE_REGULATION_OF_DEOXYRIBONUCLEASE_ACTIVITY       | -0.63 | 0.06 | 0 | 0 | 0 | not significant |
| 7994 | REACTOME_PREGNENOLONE_BIOSYNTHESIS                         | -0.63 | 0.06 | 0 | 0 | 0 | not significant |
| 7995 | DER_IFN_GAMMA_RESPONSE_DN                                  | -0.63 | 0.05 | 0 | 0 | 0 | not significant |
| 7996 | GO_LYSOSOMAL_PROTEIN_CATABOLIC_PROCESS                     | -0.63 | 0.05 | 0 | 0 | 0 | not significant |
| 7997 | GO_POSITIVE_REGULATION_OF_SYNAPTIC_VESICLE_RECYCLING       | -0.63 | 0.05 | 0 | 0 | 0 | not significant |
| 7998 | GO_REGULATION_OF_NON_MOTILE_CILIUM_ASSEMBLY                | -0.63 | 0.05 | 0 | 0 | 0 | not significant |
| 7999 | GO_RNA_POLYMERASE_III_TYPE_3_PROMOTER_DNA_BINDING          | -0.63 | 0.05 | 0 | 0 | 0 | not significant |
| 8000 | PID_P38_GAMMA_DELTA_PATHWAY                                | -0.63 | 0.05 | 0 | 0 | 0 | not significant |
| 8001 | SCHAEFFER_PROSTATE_DEVELOPMENT_AND_CANCER_BOX1_DN          | -0.63 | 0.05 | 0 | 0 | 0 | not significant |
| 8002 | BIOCARTA_BARR_MAPK_PATHWAY                                 | -0.63 | 0.04 | 0 | 0 | 0 | not significant |
| 8003 | GO_ENDOSOME_TO_LYSOSOME_TRANSPORT_VIA_MULTIVESICULAR_BC    | -0.63 | 0.04 | 0 | 0 | 0 | not significant |
| 8004 | GO_MEIOTIC_CHROMOSOME_CONDENSATION                         | -0.63 | 0.04 | 0 | 0 | 0 | not significant |
| 8005 | GO_POSITIVE_REGULATION_OF_NUCLEASE_ACTIVITY                | -0.63 | 0.04 | 0 | 0 | 0 | not significant |
| 8006 | PUJANA_BREAST_CANCER_WITH_BRCA1_MUTATED_DN                 | -0.63 | 0.04 | 0 | 0 | 0 | not significant |
| 8007 | REACTOME_ROLE_OF_ABL_IN_ROBO_SLIT_SIGNALING                | -0.63 | 0.04 | 0 | 0 | 0 | not significant |
| 8008 | ZHENG_IL22_SIGNALING_DN                                    | -0.63 | 0.04 | 0 | 0 | 0 | not significant |
| 8009 | FLECHNER_BIOPSY_KIDNEY_TRANSPLANT_OK_VS_DONOR_DN           | -0.63 | 0.03 | 0 | 0 | 0 | not significant |
| 8010 | GO_CELLULAR_PROTEIN_CONTAINING_COMPLEX_LOCALIZATION        | -0.63 | 0.03 | 0 | 0 | 0 | not significant |
| 8011 | GO_NUCLEAR_INCLUSION_BODY                                  | -0.63 | 0.03 | 0 | 0 | 0 | not significant |
| 8012 | GO_TETRAHYDROFOLATE_METABOLIC_PROCESS                      | -0.63 | 0.03 | 0 | 0 | 0 | not significant |
| 8013 | HU_ANGIOGENESIS_UP                                         | -0.63 | 0.03 | 0 | 0 | 0 | not significant |
| 8014 | ROVERSI_GLIOMA_LOH_REGIONS                                 | -0.63 | 0.03 | 0 | 0 | 0 | not significant |
| 8015 | GO_MICROTUBULE_END                                         | -0.63 | 0.02 | 0 | 0 | 0 | not significant |
| 8016 | GO_PROTEIN_DNA_COMPLEX_DISASSEMBLY                         | -0.63 | 0.02 | 0 | 0 | 0 | not significant |
| 8017 | GO_RAB_GUANYL_NUCLEOTIDE_EXCHANGE_FACTOR_ACTIVITY          | -0.63 | 0.02 | 0 | 0 | 0 | not significant |
| 8018 | REACTOME_ACTIVATION_OF_BH3_ONLY_PROTEINS                   | -0.63 | 0.02 | 0 | 0 | 0 | not significant |
| 8019 | GO_NEGATIVE_REGULATION_OF_MUSCLE_CELL_DIFFERENTIATION      | -0.63 | 0.01 | 0 | 0 | 0 | not significant |
| 8020 | KEGG_GLIOMA                                                | -0.63 | 0.01 | 0 | 0 | 0 | not significant |
| 8021 | GO_NEGATIVE_REGULATION_OF_NEURON_APOPTOTIC_PROCESS         | -0.63 | 0.00 | 0 | 0 | 0 | not significant |
| 8022 | GO_POSITIVE_REGULATION_OF_AUTOPHAGY                        | -0.63 | 0.00 | 0 | 0 | 0 | not significant |
| 8023 | GO_ANGIOGENESIS_INVOLVED_IN_WOUND_HEALING                  | -0.62 | 0.05 | 0 | 0 | 0 | not significant |
| 8024 | GO_AUTOPHAGY_OF_PEROXISOME                                 | -0.62 | 0.05 | 0 | 0 | 0 | not significant |
| 8025 | GO_GLYCOPROTEIN_COMPLEX                                    | -0.62 | 0.05 | 0 | 0 | 0 | not significant |
| 8026 | GO_NUCLEOSIDE_TRIPHOSPHATE_CATABOLIC_PROCESS               | -0.62 | 0.05 | 0 | 0 | 0 | not significant |
| 8027 | GO_TETRAHYDROFOLATE_INTERCONVERSION                        | -0.62 | 0.05 | 0 | 0 | 0 | not significant |
| 8028 | REACTOME_DOWNREGULATION_OF_ERBB4_SIGNALING                 | -0.62 | 0.05 | 0 | 0 | 0 | not significant |
| 8029 | GO_CONTRACTILE_RING                                        | -0.62 | 0.04 | 0 | 0 | 0 | not significant |
| 8030 | GO_POLYOL_TRANSPORT                                        | -0.62 | 0.04 | 0 | 0 | 0 | not significant |
| 8031 | GO_REGULATION_OF_DENDRITIC_SPINE_MAINTENANCE               | -0.62 | 0.04 | 0 | 0 | 0 | not significant |
| 8032 | GO_SMC5_SMC6_COMPLEX                                       | -0.62 | 0.04 | 0 | 0 | 0 | not significant |
| 8033 | GO_SYNAPTIC_VESICLE_ENDOSOMAL_PROCESSING                   | -0.62 | 0.04 | 0 | 0 | 0 | not significant |
| 8034 | BIOCARTA_ERK5_PATHWAY                                      | -0.62 | 0.03 | 0 | 0 | 0 | not significant |
| 8035 | DING_LUNG_CANCER_MUTATED_SIGNIFICANTLY                     | -0.62 | 0.03 | 0 | 0 | 0 | not significant |
| 8036 | GO_POSITIVE_REGULATION_OF_CELL_ADHESION_MEDIATED_BY_INTEGI | -0.62 | 0.03 | 0 | 0 | 0 | not significant |
| 8037 | GO_RDNA_BINDING                                            | -0.62 | 0.03 | 0 | 0 | 0 | not significant |
| 8038 | GO_TRANSCRIPTION_EXPORT_COMPLEX                            | -0.62 | 0.03 | 0 | 0 | 0 | not significant |
| 8039 | BIOCARTA_CTCF_PATHWAY                                      | -0.62 | 0.02 | 0 | 0 | 0 | not significant |
| 8040 | GO_NEGATIVE_REGULATION_OF_FIBROBLAST_PROLIFERATION         | -0.62 | 0.02 | 0 | 0 | 0 | not significant |
| 8041 | CHR10Q26                                                   | -0.62 | 0.01 | 0 | 0 | 0 | not significant |
| 8042 | GO_MUSCLE_CELL_APOPTOTIC_PROCESS                           | -0.62 | 0.01 | 0 | 0 | 0 | not significant |
| 8043 | GO_OVARIAN_FOLLICLE_DEVELOPMENT                            | -0.62 | 0.01 | 0 | 0 | 0 | not significant |
| 8044 | REACTOME_APOPTOTIC_EXECUTION_PHASE                         | -0.62 | 0.01 | 0 | 0 | 0 | not significant |
| 8045 | GO_DOLICHYL_PHOSPHATE_MANNANOSE_PROTEIN_MANNOSYLTRANSFER   | -0.61 | 0.05 | 0 | 0 | 0 | not significant |
| 8046 | GO_L_ASCORBIC_ACID_METABOLIC_PROCESS                       | -0.61 | 0.05 | 0 | 0 | 0 | not significant |
| 8047 | REACTOME_TRAIL_SIGNALING                                   | -0.61 | 0.05 | 0 | 0 | 0 | not significant |
| 8048 | GO_LATE_ENDOSOME_TO_LYSOSOME_TRANSPORT                     | -0.61 | 0.04 | 0 | 0 | 0 | not significant |
| 8049 | GO_NEGATIVE_REGULATION_OF_DNA_DAMAGE_RESPONSE_SIGNAL_TR    | -0.61 | 0.04 | 0 | 0 | 0 | not significant |
| 8050 | GO_NUCLEAR_MEMBRANE_ORGANIZATION                           | -0.61 | 0.04 | 0 | 0 | 0 | not significant |
| 8051 | CHRXQ23                                                    | -0.61 | 0.03 | 0 | 0 | 0 | not significant |
| 8052 | GO_LATERAL_ELEMENT                                         | -0.61 | 0.03 | 0 | 0 | 0 | not significant |
| 8053 | GO_NUCLEOSOME_POSITIONING                                  | -0.61 | 0.03 | 0 | 0 | 0 | not significant |
| 8054 | KEGG_ETHER_LIPID_METABOLISM                                | -0.61 | 0.03 | 0 | 0 | 0 | not significant |

|      |                                                             |       |      |   |   |   |                 |
|------|-------------------------------------------------------------|-------|------|---|---|---|-----------------|
| 8055 | REACTOME ACTIVATION OF IRF3 IRF7 MEDIATED BY TBK1 IKK EPSIL | -0.61 | 0.03 | 0 | 0 | 0 | not significant |
| 8056 | TURJANSKI_MAPK7_TARGETS                                     | -0.61 | 0.03 | 0 | 0 | 0 | not significant |
| 8057 | WENDT_COHESIN_TARGETS_UP                                    | -0.61 | 0.02 | 0 | 0 | 0 | not significant |
| 8058 | GO_CUL4_RING_E3_UBIQUITIN_LIGASE_COMPLEX                    | -0.61 | 0.01 | 0 | 0 | 0 | not significant |
| 8059 | GO_NEGATIVE_REGULATION_OF_DNA_REPLICATION                   | -0.61 | 0.01 | 0 | 0 | 0 | not significant |
| 8060 | GO_THYROID_HORMONE_RECEPTOR_BINDING                         | -0.61 | 0.01 | 0 | 0 | 0 | not significant |
| 8061 | REACTOME TAK1 ACTIVATES NFKB BY PHOSPHORYLATION AND ACT     | -0.61 | 0.01 | 0 | 0 | 0 | not significant |
| 8062 | BIOCARTA_MAPK_PATHWAY                                       | -0.61 | 0.00 | 0 | 0 | 0 | not significant |
| 8063 | GO_ACTIN_FILAMENT_SEVERING                                  | -0.60 | 0.05 | 0 | 0 | 0 | not significant |
| 8064 | GO_GROWTH_HORMONE_SECRETION                                 | -0.60 | 0.04 | 0 | 0 | 0 | not significant |
| 8065 | GO_MANGANESE_ION_TRANSPORT                                  | -0.60 | 0.04 | 0 | 0 | 0 | not significant |
| 8066 | GO_POSITIVE_REGULATION_OF_PROTEIN_LOCALIZATION_TO_EARLY_EI  | -0.60 | 0.04 | 0 | 0 | 0 | not significant |
| 8067 | GO_POTASSIUM_ION_ANTIPORTER_ACTIVITY                        | -0.60 | 0.04 | 0 | 0 | 0 | not significant |
| 8068 | GO_1_PHOSPHATIDYLINOSITOL_4_PHOSPHATE_3_KINASE_ACTIVITY     | -0.60 | 0.03 | 0 | 0 | 0 | not significant |
| 8069 | GO_CEREBRAL_CORTEX_NEURON_DIFFERENTIATION                   | -0.60 | 0.03 | 0 | 0 | 0 | not significant |
| 8070 | GO_CONDENSIN_COMPLEX                                        | -0.60 | 0.03 | 0 | 0 | 0 | not significant |
| 8071 | GO_INTRINSIC_COMPONENT_OF_PEROXISOMAL_MEMBRANE              | -0.60 | 0.03 | 0 | 0 | 0 | not significant |
| 8072 | GO_MALE_GERM_CELL_NUCLEUS                                   | -0.60 | 0.03 | 0 | 0 | 0 | not significant |
| 8073 | GO_NUCLEAR_LAMINA                                           | -0.60 | 0.03 | 0 | 0 | 0 | not significant |
| 8074 | GO_RAL_GTPASE_BINDING                                       | -0.60 | 0.03 | 0 | 0 | 0 | not significant |
| 8075 | GO_REGULATION_OF_PLASMA_MEMBRANE_ORGANIZATION               | -0.60 | 0.03 | 0 | 0 | 0 | not significant |
| 8076 | GO_RESPONSE_TO_CELL_CYCLE_CHECKPOINT_SIGNALING              | -0.60 | 0.03 | 0 | 0 | 0 | not significant |
| 8077 | REACTOME GLYCOGEN SYNTHESIS                                 | -0.60 | 0.03 | 0 | 0 | 0 | not significant |
| 8078 | ZEMBUSU SENSITIVITY TO FLUOROURACIL                         | -0.60 | 0.03 | 0 | 0 | 0 | not significant |
| 8079 | GARGALOVIC_RESPONSE_TO_OXIDIZED_PHOSPHOLIPIDS_SALMON_DN     | -0.60 | 0.02 | 0 | 0 | 0 | not significant |
| 8080 | GO_CATECHOLAMINE_METABOLIC_PROCESS                          | -0.60 | 0.02 | 0 | 0 | 0 | not significant |
| 8081 | GO_MAINTENANCE_OF_CELL_POLARITY                             | -0.60 | 0.02 | 0 | 0 | 0 | not significant |
| 8082 | GO_NEURON_PROJECTION_REGENERATION                           | -0.60 | 0.02 | 0 | 0 | 0 | not significant |
| 8083 | GO_PERICENTRIC_HETEROCHROMATIN                              | -0.60 | 0.02 | 0 | 0 | 0 | not significant |
| 8084 | GO_VIRAL_BUDDING_VIA_HOST_ESCRT_COMPLEX                     | -0.60 | 0.02 | 0 | 0 | 0 | not significant |
| 8085 | REACTOME IKK_COMPLEX_RECRUITMENT_MEDIATED_BY_RIP1           | -0.60 | 0.02 | 0 | 0 | 0 | not significant |
| 8086 | BIOCARTA_BAD_PATHWAY                                        | -0.60 | 0.01 | 0 | 0 | 0 | not significant |
| 8087 | BIOCARTA_CREB_PATHWAY                                       | -0.60 | 0.01 | 0 | 0 | 0 | not significant |
| 8088 | GO_PHOSPHOLIPID_DEPHOSPHORYLATION                           | -0.60 | 0.01 | 0 | 0 | 0 | not significant |
| 8089 | GO_REGULATION_OF_CENTROSOME_DUPLICATION                     | -0.60 | 0.01 | 0 | 0 | 0 | not significant |
| 8090 | GO_CHROMATIN_REMODELING                                     | -0.60 | 0.00 | 0 | 0 | 0 | not significant |
| 8091 | REACTOME_RAB_GEF5_EXCHANGE_GTP_FOR_GDP_ON_RABS              | -0.60 | 0.00 | 0 | 0 | 0 | not significant |
| 8092 | GO_NEGATIVE_REGULATION_OF_DNA_ENDOREPLICATION               | -0.59 | 0.05 | 0 | 0 | 0 | not significant |
| 8093 | BIOCARTA_VITCB_PATHWAY                                      | -0.59 | 0.03 | 0 | 0 | 0 | not significant |
| 8094 | GO_MACROMOLECULE_DEPALMITOYLATION                           | -0.59 | 0.03 | 0 | 0 | 0 | not significant |
| 8095 | GO_NEGATIVE_REGULATION_OF_VOLTAGE_GATED_CALCIUM_CHANNEL     | -0.59 | 0.03 | 0 | 0 | 0 | not significant |
| 8096 | J1_METASTASIS_REPRESSED_BY_STK11                            | -0.59 | 0.03 | 0 | 0 | 0 | not significant |
| 8097 | GO_MITOTIC_RECOMBINATION                                    | -0.59 | 0.02 | 0 | 0 | 0 | not significant |
| 8098 | GO_PHOSPHOTRANSFERASE_ACTIVITY_FOR_OTHER_SUBSTITUTED_PH     | -0.59 | 0.02 | 0 | 0 | 0 | not significant |
| 8099 | GO_THYROID_GLAND_DEVELOPMENT                                | -0.59 | 0.02 | 0 | 0 | 0 | not significant |
| 8100 | REACTOME_MISMATCH_REPAIR                                    | -0.59 | 0.02 | 0 | 0 | 0 | not significant |
| 8101 | GO_SELECTIVE_AUTOPHAGY                                      | -0.59 | 0.01 | 0 | 0 | 0 | not significant |
| 8102 | DAZARD_UV_RESPONSE_CLUSTER_G6                               | -0.59 | 0.00 | 0 | 0 | 0 | not significant |
| 8103 | GO_GLYCOLIPID_TRANSPORT                                     | -0.58 | 0.04 | 0 | 0 | 0 | not significant |
| 8104 | HEIDENBLAD_AMPLIFIED_IN_BONE_CANCER                         | -0.58 | 0.04 | 0 | 0 | 0 | not significant |
| 8105 | GO_LYSOSOMAL_LUMEN_ACIDIFICATION                            | -0.58 | 0.03 | 0 | 0 | 0 | not significant |
| 8106 | GO_PLATELET_DENSE_GRANULE_ORGANIZATION                      | -0.58 | 0.03 | 0 | 0 | 0 | not significant |
| 8107 | GO_POSITIVE_REGULATION_OF_NEUROTRANSMITTER_SECRETION        | -0.58 | 0.03 | 0 | 0 | 0 | not significant |
| 8108 | GO_POSITIVE_REGULATION_OF_PHAGOCYTOSIS_ENGULFMENT           | -0.58 | 0.03 | 0 | 0 | 0 | not significant |
| 8109 | GO_PRIMARY_AMINO_COMPOUND_METABOLIC_PROCESS                 | -0.58 | 0.03 | 0 | 0 | 0 | not significant |
| 8110 | GO_PROTEIN_LOCALIZATION_TO_EARLY_ENDOSOME                   | -0.58 | 0.03 | 0 | 0 | 0 | not significant |
| 8111 | GO_REGULATION_OF_MRNA_EXPORT_FROM_NUCLEUS                   | -0.58 | 0.03 | 0 | 0 | 0 | not significant |
| 8112 | GO_RETINAL_GANGLION_CELL_AXON_GUIDANCE                      | -0.58 | 0.03 | 0 | 0 | 0 | not significant |
| 8113 | GO_RNA_POLYMERASE_III_REGULATORY_REGION_DNA_BINDING         | -0.58 | 0.03 | 0 | 0 | 0 | not significant |
| 8114 | SINGH_KRAS_DEPENDENCY_SIGNATURE_                            | -0.58 | 0.03 | 0 | 0 | 0 | not significant |
| 8115 | BIOCARTA_MYOSIN_PATHWAY                                     | -0.58 | 0.02 | 0 | 0 | 0 | not significant |
| 8116 | CHR13Q22                                                    | -0.58 | 0.02 | 0 | 0 | 0 | not significant |
| 8117 | GO_ESTABLISHMENT_OF_ENDOTHELIAL_INTESTINAL_BARRIER          | -0.58 | 0.02 | 0 | 0 | 0 | not significant |
| 8118 | GO_INTERLEUKIN_12_BIOSYNTHETIC_PROCESS                      | -0.58 | 0.02 | 0 | 0 | 0 | not significant |
| 8119 | GO_PALMITOYL_PROTEIN_HYDROLASE_ACTIVITY                     | -0.58 | 0.02 | 0 | 0 | 0 | not significant |
| 8120 | GO_POSITIVE_REGULATION_OF_CELLULAR_RESPONSE_TO_INSULIN_ST   | -0.58 | 0.02 | 0 | 0 | 0 | not significant |
| 8121 | GO_POSITIVE_REGULATION_OF_EARLY_ENDOSOME_TO_LATE_ENDOSC     | -0.58 | 0.02 | 0 | 0 | 0 | not significant |
| 8122 | GO_POSITIVE_REGULATION_OF_NEUROTRANSMITTER_TRANSPORT        | -0.58 | 0.02 | 0 | 0 | 0 | not significant |
| 8123 | GO_PREFOLDIN_COMPLEX                                        | -0.58 | 0.02 | 0 | 0 | 0 | not significant |
| 8124 | GO_PRODUCTION_OF_SIRNA_INVOLVED_IN_RNA_INTERFERENCE         | -0.58 | 0.02 | 0 | 0 | 0 | not significant |
| 8125 | NIKOLSKY_BREAST_CANCER_12Q24_AMPLICON                       | -0.58 | 0.02 | 0 | 0 | 0 | not significant |
| 8126 | REACTOME_SUMO_IS_PROTEOLYTICALLY_PROCESSED                  | -0.58 | 0.02 | 0 | 0 | 0 | not significant |
| 8127 | BIOCARTA_CXCR4_PATHWAY                                      | -0.58 | 0.01 | 0 | 0 | 0 | not significant |
| 8128 | BIOCARTA_GSK3_PATHWAY                                       | -0.58 | 0.01 | 0 | 0 | 0 | not significant |
| 8129 | ZHANG_ADIPOGENESIS_BY_BMP7                                  | -0.58 | 0.01 | 0 | 0 | 0 | not significant |
| 8130 | ZHONG_RESPONSE_TO_AZACITIDINE_AND_TSA_DN                    | -0.58 | 0.00 | 0 | 0 | 0 | not significant |
| 8131 | GO_CARDIOLIPIN_BINDING                                      | -0.57 | 0.03 | 0 | 0 | 0 | not significant |
| 8132 | GO_CUL4B_RING_E3_UBIQUITIN_LIGASE_COMPLEX                   | -0.57 | 0.03 | 0 | 0 | 0 | not significant |
| 8133 | GO{EIF2ALPHA_PHOSPHORYLATION_IN_RESPONSE_TO_ENDOPLASMIC     | -0.57 | 0.03 | 0 | 0 | 0 | not significant |
| 8134 | GO_ORGANIC_ACID_SODIUM_SYMPORTER_ACTIVITY                   | -0.57 | 0.03 | 0 | 0 | 0 | not significant |
| 8135 | GO_S_ADENOSYLMETHIONNE_CYCLE                                | -0.57 | 0.03 | 0 | 0 | 0 | not significant |
| 8136 | CHR8Q11                                                     | -0.57 | 0.02 | 0 | 0 | 0 | not significant |
| 8137 | GO_ACTIN_FILAMENT_BASED_TRANSPORT                           | -0.57 | 0.02 | 0 | 0 | 0 | not significant |
| 8138 | GO_C4_DICARBOXYLATE_TRANSMEMBRANE_TRANSPORTER_ACTIVITY      | -0.57 | 0.02 | 0 | 0 | 0 | not significant |
| 8139 | GO_DNA_STRAND_ELONGATION_INVOLVED_IN_DNA_REPLICATION        | -0.57 | 0.02 | 0 | 0 | 0 | not significant |
| 8140 | GO_NEGATIVE_REGULATION_OF_CYSTEINE_TYPE_ENDOPEPTIDASE_AC    | -0.57 | 0.02 | 0 | 0 | 0 | not significant |
| 8141 | GO_REGULATION_OF_SYNCYTIUM_FORMATION_BY_PLASMA_MEMBRANE     | -0.57 | 0.02 | 0 | 0 | 0 | not significant |
| 8142 | IZUKA_LIVER_CANCER_PROGRESSION_L1_G1_DN                     | -0.57 | 0.02 | 0 | 0 | 0 | not significant |
| 8143 | SHIRAIISHI_PLZF_TARGETS_DN                                  | -0.57 | 0.02 | 0 | 0 | 0 | not significant |
| 8144 | GO_DYNEIN_COMPLEX                                           | -0.57 | 0.01 | 0 | 0 | 0 | not significant |
| 8145 | GO_ERROR_PRONE_TRANSLESION_SYNTHESIS                        | -0.57 | 0.01 | 0 | 0 | 0 | not significant |
| 8146 | GO_PROTEIN_PHOSPHORYLATED_AMINO_ACID_BINDING                | -0.57 | 0.01 | 0 | 0 | 0 | not significant |
| 8147 | GO_REGULATION_OF_MRNA_POLYADENYLATION                       | -0.57 | 0.01 | 0 | 0 | 0 | not significant |
| 8148 | HEDENFALK_BREAST_CANCER_BRACX_DN                            | -0.57 | 0.01 | 0 | 0 | 0 | not significant |
| 8149 | KYNG_WERNER_SYNDROM_UP                                      | -0.57 | 0.01 | 0 | 0 | 0 | not significant |
| 8150 | PID_INTEGRIN_A4B1_PATHWAY                                   | -0.57 | 0.01 | 0 | 0 | 0 | not significant |
| 8151 | GO_ANDROGEN_RECEPTOR_SIGNALING_PATHWAY                      | -0.57 | 0.00 | 0 | 0 | 0 | not significant |
| 8152 | GO_TRANSCRIPTIONAL_REPRESSOR_COMPLEX                        | -0.57 | 0.00 | 0 | 0 | 0 | not significant |
| 8153 | GO_ESTROGEN_METABOLIC_PROCESS                               | -0.56 | 0.03 | 0 | 0 | 0 | not significant |
| 8154 | GO_SPLICEOSOMAL_CONFORMATIONAL_CHANGES_TO_GENERATE_CA1      | -0.56 | 0.03 | 0 | 0 | 0 | not significant |
| 8155 | GO_TRANSCRIPTION_FACTOR_AP_1_COMPLEX                        | -0.56 | 0.03 | 0 | 0 | 0 | not significant |
| 8156 | REACTOME_MET_ACTIVATES_RAP1_AND_RAC1                        | -0.56 | 0.03 | 0 | 0 | 0 | not significant |
| 8157 | CHR11P14                                                    | -0.56 | 0.02 | 0 | 0 | 0 | not significant |
| 8158 | CHR4Q34                                                     | -0.56 | 0.02 | 0 | 0 | 0 | not significant |
| 8159 | GO_ASTRAL_MICROTUBULE_ORGANIZATION                          | -0.56 | 0.02 | 0 | 0 | 0 | not significant |
| 8160 | GO_REGULATION_OF_HETEROTYPIC_CELL_CELL_ADHESION             | -0.56 | 0.02 | 0 | 0 | 0 | not significant |
| 8161 | GO_VERY_LONG_CHAIN_FATTY_ACID_METABOLIC_PROCESS             | -0.56 | 0.02 | 0 | 0 | 0 | not significant |
| 8162 | INAMURA_LUNG_CANCER_SCC_SUBTYPES_DN                         | -0.56 | 0.02 | 0 | 0 | 0 | not significant |
| 8163 | LIU_CMYB_TARGETS_DN                                         | -0.56 | 0.02 | 0 | 0 | 0 | not significant |

|      |                                                             |       |      |   |   |   |                 |
|------|-------------------------------------------------------------|-------|------|---|---|---|-----------------|
| 8164 | REACTOME_PHASE_2_PLATEAU_PHASE                              | -0.56 | 0.02 | 0 | 0 | 0 | not significant |
| 8165 | BIOCARTA_CERAMIDE_PATHWAY                                   | -0.56 | 0.01 | 0 | 0 | 0 | not significant |
| 8166 | GO_REGULATION_OF_MYOBLAST_FUSION                            | -0.56 | 0.01 | 0 | 0 | 0 | not significant |
| 8167 | GO_TELOMERE_MAINTENANCE_VIA_SEMI_CONSERVATIVE_REPLICATION   | -0.56 | 0.01 | 0 | 0 | 0 | not significant |
| 8168 | MOREIRA_RESPONSE_TO_TSA_DN                                  | -0.56 | 0.01 | 0 | 0 | 0 | not significant |
| 8169 | REACTOME_THE_NLRP3_INFLAMMASOME                             | -0.56 | 0.01 | 0 | 0 | 0 | not significant |
| 8170 | GO_DNA_INSERTION_OR_DELETION_BINDING                        | -0.55 | 0.03 | 0 | 0 | 0 | not significant |
| 8171 | GO_NEGATIVE_REGULATION_OF_HEART_RATE                        | -0.55 | 0.02 | 0 | 0 | 0 | not significant |
| 8172 | GO_NEGATIVE_REGULATION_OF_VIRAL_ENTRY_INTO_HOST_CELL        | -0.55 | 0.02 | 0 | 0 | 0 | not significant |
| 8173 | GO_POSITIVE_REGULATION_OF_TOLL_LIKE_RECEPTOR_3_SIGNALING_F  | -0.55 | 0.02 | 0 | 0 | 0 | not significant |
| 8174 | GO_REGULATION_OF_MYOSIN_LIGHT_CHAIN_PHOSPHATASE_ACTIVITY    | -0.55 | 0.02 | 0 | 0 | 0 | not significant |
| 8175 | GO_SEQUESTERING_OF_METAL_ION                                | -0.55 | 0.02 | 0 | 0 | 0 | not significant |
| 8176 | GO_SKELETAL_MUSCLE_ACETYLCHOLINE_GATED_CHANNEL_CLUSTERING   | -0.55 | 0.02 | 0 | 0 | 0 | not significant |
| 8177 | PID_THROMBIN_PAR4_PATHWAY                                   | -0.55 | 0.02 | 0 | 0 | 0 | not significant |
| 8178 | REACTOME_DEGRADATION_OF_CYSTEINE_AND_HOMOCYSTEINE           | -0.55 | 0.02 | 0 | 0 | 0 | not significant |
| 8179 | REACTOME_ZINC_TRANSPORTERS                                  | -0.55 | 0.02 | 0 | 0 | 0 | not significant |
| 8180 | GO_NEGATIVE_REGULATION_OF_VIRAL_TRANSCRIPTION               | -0.55 | 0.01 | 0 | 0 | 0 | not significant |
| 8181 | GO_VASCULAR_SMOOTH_MUSCLE_CONTRACTION                       | -0.55 | 0.01 | 0 | 0 | 0 | not significant |
| 8182 | REACTOME_SYNTHESIS_OF_PC                                    | -0.55 | 0.01 | 0 | 0 | 0 | not significant |
| 8183 | REACTOME_TELOMERE_C_STRAND_LAGGING_STRAND_SYNTHESIS         | -0.55 | 0.01 | 0 | 0 | 0 | not significant |
| 8184 | REACTOME_UPTAKE_AND_ACTIONS_OF_BACTERIAL_TOXINS             | -0.55 | 0.01 | 0 | 0 | 0 | not significant |
| 8185 | DACOSTA_UV_RESPONSE_VIA_ERCC3_TTD_DN                        | -0.55 | 0.01 | 0 | 0 | 0 | not significant |
| 8186 | KEGG_ENDOMETRIAL_CANCER                                     | -0.55 | 0.00 | 0 | 0 | 0 | not significant |
| 8187 | GO_MONOCYTE_CHEMOTACTIC_PROTEIN_1_PRODUCTION                | -0.54 | 0.03 | 0 | 0 | 0 | not significant |
| 8188 | GO_REGULATION_OF_XENOPHAGY                                  | -0.54 | 0.03 | 0 | 0 | 0 | not significant |
| 8189 | GO_COPI_COATED_VESICLE_BUDDING                              | -0.54 | 0.02 | 0 | 0 | 0 | not significant |
| 8190 | GO_COPI_VESICLE_COAT                                        | -0.54 | 0.02 | 0 | 0 | 0 | not significant |
| 8191 | GO_GAMMA_AMINOBTYRIC_ACID_SECRETION                         | -0.54 | 0.02 | 0 | 0 | 0 | not significant |
| 8192 | GO_MEIOTIC_COHESIN_COMPLEX                                  | -0.54 | 0.02 | 0 | 0 | 0 | not significant |
| 8193 | GO_OXIDOREDUCTASE_ACTIVITY_ACTING_ON_THE_ALDEHYDE_OR_OX     | -0.54 | 0.02 | 0 | 0 | 0 | not significant |
| 8194 | GO_PURINE_NUCLEOSIDE_CATABOLIC_PROCESS                      | -0.54 | 0.02 | 0 | 0 | 0 | not significant |
| 8195 | GO_REGULATION_OF_NEUROTRANSMITTER_RECEPTOR_LOCALIZATION     | -0.54 | 0.02 | 0 | 0 | 0 | not significant |
| 8196 | SUZUKI_AMPLIFIED_IN_ORAL_CANCER                             | -0.54 | 0.02 | 0 | 0 | 0 | not significant |
| 8197 | GO_ENDOPLASMIC_RETICULUM_TUBULAR_NETWORK                    | -0.54 | 0.01 | 0 | 0 | 0 | not significant |
| 8198 | GO_INTRACELLULAR_DISTRIBUTION_OF_MITOCHONDRIA               | -0.54 | 0.01 | 0 | 0 | 0 | not significant |
| 8199 | GO_NEGATIVE_REGULATION_OF_FATTY_ACID_BIOSYNTHETIC_PROCES    | -0.54 | 0.01 | 0 | 0 | 0 | not significant |
| 8200 | GO_PYRIMIDINE_NUCLEOSIDE_MONOPHOSPHATE_BIOSYNTHETIC_PROCI   | -0.54 | 0.01 | 0 | 0 | 0 | not significant |
| 8201 | GO_REGULATION_OF_TRANSLATIONAL_INITIATION_BY_EIF2_ALPHA_PHC | -0.54 | 0.01 | 0 | 0 | 0 | not significant |
| 8202 | MATZUK_SPERMATOGONIA                                        | -0.54 | 0.01 | 0 | 0 | 0 | not significant |
| 8203 | REACTOME_TRANSLATION_SYNTHESIS_BY_POLK                      | -0.54 | 0.01 | 0 | 0 | 0 | not significant |
| 8204 | GO_BLOC_COMPLEX                                             | -0.54 | 0.00 | 0 | 0 | 0 | not significant |
| 8205 | GO_REGULATION_OF_DNA_TEMPLATED_TRANSCRIPTION_ELONGATION     | -0.54 | 0.00 | 0 | 0 | 0 | not significant |
| 8206 | BIOCARTA_BARRESTIN_PATHWAY                                  | -0.53 | 0.02 | 0 | 0 | 0 | not significant |
| 8207 | GO_GAMMA_AMINOBTYRIC_ACID_TRANSPORT                         | -0.53 | 0.02 | 0 | 0 | 0 | not significant |
| 8208 | GO_HISTONE_H3_K27_TRIMETHYLATION                            | -0.53 | 0.02 | 0 | 0 | 0 | not significant |
| 8209 | GO_MSL_COMPLEX                                              | -0.53 | 0.02 | 0 | 0 | 0 | not significant |
| 8210 | GO_NEGATIVE_REGULATION_OF_PROTEIN_K63_LINKED_UBIQUITINATION | -0.53 | 0.02 | 0 | 0 | 0 | not significant |
| 8211 | GO_SHELTERIN_COMPLEX                                        | -0.53 | 0.02 | 0 | 0 | 0 | not significant |
| 8212 | GO_SPANNING_COMPONENT_OF_MEMBRANE                           | -0.53 | 0.02 | 0 | 0 | 0 | not significant |
| 8213 | GO_SUMO_SPECIFIC_PROTEASE_ACTIVITY                          | -0.53 | 0.02 | 0 | 0 | 0 | not significant |
| 8214 | RUAN_RESPONSE_TO_TROGLITAZONE_DN                            | -0.53 | 0.02 | 0 | 0 | 0 | not significant |
| 8215 | BENPORATH_ES_CORE_NINE                                      | -0.53 | 0.01 | 0 | 0 | 0 | not significant |
| 8216 | GO_DEOXYRIBONUCLEOTIDE_BINDING                              | -0.53 | 0.01 | 0 | 0 | 0 | not significant |
| 8217 | GO_ESTABLISHMENT_OF_PIGMENT_Granule_LOCALIZATION            | -0.53 | 0.01 | 0 | 0 | 0 | not significant |
| 8218 | GO_LEWY_BODY                                                | -0.53 | 0.01 | 0 | 0 | 0 | not significant |
| 8219 | GO_POSITIVE_REGULATION_OF_AUTOPHAGOSOME_ASSEMBLY            | -0.53 | 0.01 | 0 | 0 | 0 | not significant |
| 8220 | GO_POSITIVE_REGULATION_OF_CENTROSOME_CYCLE                  | -0.53 | 0.01 | 0 | 0 | 0 | not significant |
| 8221 | GO_POSITIVE_REGULATION_OF_MYELINATION                       | -0.53 | 0.01 | 0 | 0 | 0 | not significant |
| 8222 | GO_VASCULAR_ASSOCIATED_SMOOTH_MUSCLE_CELL_MIGRATION         | -0.53 | 0.01 | 0 | 0 | 0 | not significant |
| 8223 | GO_CELLULAR_RESPONSE_TO_VITAMIN                             | -0.53 | 0.00 | 0 | 0 | 0 | not significant |
| 8224 | GO_POSITIVE_REGULATION_OF_CELL_CYCLE_G2_M_PHASE_TRANSITIO   | -0.53 | 0.00 | 0 | 0 | 0 | not significant |
| 8225 | GO_TRANSITION_METAL_ION_TRANSMEMBRANE_TRANSPORTER_ACTIVI    | -0.53 | 0.00 | 0 | 0 | 0 | not significant |
| 8226 | GO_RESPONSE_TO_LIGHT_INTENSITY                              | -0.52 | 0.02 | 0 | 0 | 0 | not significant |
| 8227 | REACTOME_MITOCHONDRIAL_FATTY_ACID_BETA_OXIDATION_OF_UNSA    | -0.52 | 0.02 | 0 | 0 | 0 | not significant |
| 8228 | CHR4Q35                                                     | -0.52 | 0.01 | 0 | 0 | 0 | not significant |
| 8229 | GAUSSMANN_MLL_AF4_FUSION_TARGETS_G_DN                       | -0.52 | 0.01 | 0 | 0 | 0 | not significant |
| 8230 | GO_ACTIVATION_OF_NF_KAPPAB_INDUCING_KINASE_ACTIVITY         | -0.52 | 0.01 | 0 | 0 | 0 | not significant |
| 8231 | GO_ZINC_ION_TRANSMEMBRANE_TRANSPORTER_ACTIVITY              | -0.52 | 0.01 | 0 | 0 | 0 | not significant |
| 8232 | REACTOME_REGULATION_OF_IFNG_SIGNALING                       | -0.52 | 0.01 | 0 | 0 | 0 | not significant |
| 8233 | GO_2_OXOGLUTARATE_DEPENDENT_DIOXYGENASE_ACTIVITY            | -0.52 | 0.00 | 0 | 0 | 0 | not significant |
| 8234 | CHR4P13                                                     | -0.51 | 0.02 | 0 | 0 | 0 | not significant |
| 8235 | GO_TRANSCRIPTION_FACTOR_TFIIB_COMPLEX                       | -0.51 | 0.02 | 0 | 0 | 0 | not significant |
| 8236 | BIOCARTA_BCELLSURVIVAL_PATHWAY                              | -0.51 | 0.01 | 0 | 0 | 0 | not significant |
| 8237 | GO_CARDIAC_MYOFIBRIL_ASSEMBLY                               | -0.51 | 0.01 | 0 | 0 | 0 | not significant |
| 8238 | GO_COMMON_MYELOID_PROGENITOR_CELL_PROLIFERATION             | -0.51 | 0.01 | 0 | 0 | 0 | not significant |
| 8239 | GO_NEGATIVE_REGULATION_OF_PLATELET_DERIVED_GROWTH_FACTC     | -0.51 | 0.01 | 0 | 0 | 0 | not significant |
| 8240 | GO_REGULATION_OF_HEXOKINASE_ACTIVITY                        | -0.51 | 0.01 | 0 | 0 | 0 | not significant |
| 8241 | GO_RESPONSE_TO_LEAD_ION                                     | -0.51 | 0.01 | 0 | 0 | 0 | not significant |
| 8242 | GO_TYPE_B_PANCREATIC_CELL_PROLIFERATION                     | -0.51 | 0.01 | 0 | 0 | 0 | not significant |
| 8243 | TAKEDA_TARGETS_OF_NUP98_HOXA9_FUSION_3D_DN                  | -0.51 | 0.01 | 0 | 0 | 0 | not significant |
| 8244 | CHR5P13                                                     | -0.51 | 0.00 | 0 | 0 | 0 | not significant |
| 8245 | GENTILE_RESPONSE_CLUSTER_D3                                 | -0.51 | 0.00 | 0 | 0 | 0 | not significant |
| 8246 | GO_FOLIC_ACID_BINDING                                       | -0.51 | 0.00 | 0 | 0 | 0 | not significant |
| 8247 | GO_NEGATIVE_REGULATION_OF_PROTEIN_KINASE_B_SIGNALING        | -0.51 | 0.00 | 0 | 0 | 0 | not significant |
| 8248 | PID_TRAIL_PATHWAY                                           | -0.51 | 0.00 | 0 | 0 | 0 | not significant |
| 8249 | REACTOME_RECOGNITION_OF_DNA_DAMAGE_BY_PCNA_CONTAINING_R     | -0.51 | 0.00 | 0 | 0 | 0 | not significant |
| 8250 | GO_1_ACYLGLYCEROPHOSPHOCHOLINE_O_ACYLTRANSFERASE_ACTIVI     | -0.50 | 0.02 | 0 | 0 | 0 | not significant |
| 8251 | BIOCARTA_CK1_PATHWAY                                        | -0.50 | 0.01 | 0 | 0 | 0 | not significant |
| 8252 | BIOCARTA_RNAPOL3_PATHWAY                                    | -0.50 | 0.01 | 0 | 0 | 0 | not significant |
| 8253 | GO_CD4_RECEPTOR_BINDING                                     | -0.50 | 0.01 | 0 | 0 | 0 | not significant |
| 8254 | GO_MRE11_COMPLEX                                            | -0.50 | 0.01 | 0 | 0 | 0 | not significant |
| 8255 | GO_NEURON_INTRINSIC_APOPTOTIC_SIGNALING_PATHWAY_IN_RESPON   | -0.50 | 0.01 | 0 | 0 | 0 | not significant |
| 8256 | GO_PEPIDYL_PROLINE_4_DIOXYGENASE_ACTIVITY                   | -0.50 | 0.01 | 0 | 0 | 0 | not significant |
| 8257 | GO_PEPIDYL_PROLINE_HYDROXYLATION_TO_4_HYDROXY_L_PROLINE     | -0.50 | 0.01 | 0 | 0 | 0 | not significant |
| 8258 | GO_POSITIVE_REGULATION_OF_PROTEIN_HOMODIMERIZATION_ACTIVIT  | -0.50 | 0.01 | 0 | 0 | 0 | not significant |
| 8259 | GO_REGULATION_OF_NEURON_PROJECTION_REGENERATION             | -0.50 | 0.01 | 0 | 0 | 0 | not significant |
| 8260 | GO_SUMO_POLYMER_BINDING                                     | -0.50 | 0.01 | 0 | 0 | 0 | not significant |
| 8261 | NAGY_STAGA_COMPONENTS_HUMAN                                 | -0.50 | 0.01 | 0 | 0 | 0 | not significant |
| 8262 | WEBER_METHYLATED_HCP_IN_SPERM_UP                            | -0.50 | 0.01 | 0 | 0 | 0 | not significant |
| 8263 | FINETTI_BREAST_CANCERS_KINOME_GRAY                          | -0.50 | 0.00 | 0 | 0 | 0 | not significant |
| 8264 | GO_ENDODERMAL_CELL_FATE_COMMITMENT                          | -0.50 | 0.00 | 0 | 0 | 0 | not significant |
| 8265 | GO_POLY_A_PLUS_MRNA_EXPORT_FROM_NUCLEUS                     | -0.50 | 0.00 | 0 | 0 | 0 | not significant |
| 8266 | GO_UV_DAMAGE_EXCISION_REPAIR                                | -0.50 | 0.00 | 0 | 0 | 0 | not significant |
| 8267 | CHR14Q31                                                    | -0.49 | 0.01 | 0 | 0 | 0 | not significant |
| 8268 | GO_NEGATIVE_REGULATION_OF_CELL_SIZE                         | -0.49 | 0.01 | 0 | 0 | 0 | not significant |
| 8269 | GO_NEUROPEPTIDE_RECEPTOR_ACTIVITY                           | -0.49 | 0.01 | 0 | 0 | 0 | not significant |
| 8270 | GO_PANTOTHENATE_METABOLIC_PROCESS                           | -0.49 | 0.01 | 0 | 0 | 0 | not significant |
| 8271 | SCHAEFFER_PROSTATE_DEVELOPMENT_AND_CANCER_BOX4_UP           | -0.49 | 0.01 | 0 | 0 | 0 | not significant |
| 8272 | GO_ENDOSOME_TRANSPORT_VIA_MULTIVESICULAR_BODY_SORTING_P     | -0.49 | 0.00 | 0 | 0 | 0 | not significant |

|      |                                                             |       |      |   |   |   |                 |
|------|-------------------------------------------------------------|-------|------|---|---|---|-----------------|
| 8273 | GO_PHOSPHATIDYLINOSITOL_PHOSPHATE_KINASE_ACTIVITY           | -0.49 | 0.00 | 0 | 0 | 0 | not significant |
| 8274 | REACTOME_CLASS_I_PEROXISOMAL_MEMBRANE_PROTEIN_IMPORT        | -0.49 | 0.00 | 0 | 0 | 0 | not significant |
| 8275 | GO_RESPONSE_TO_DEFENSES_OF_OTHER_ORGANISM_INVOLVED_IN_S     | -0.48 | 0.01 | 0 | 0 | 0 | not significant |
| 8276 | BIOCARTA_PLG_PATHWAY                                        | -0.48 | 0.00 | 0 | 0 | 0 | not significant |
| 8277 | BOQUEST_STEM_CELL_CULTURED_VS_FRESH_DN                      | -0.48 | 0.00 | 0 | 0 | 0 | not significant |
| 8278 | GARGALOVIC_RESPONSE_TO_OXIDIZED_PHOSPHOLIPIDS_RED_DN        | -0.48 | 0.00 | 0 | 0 | 0 | not significant |
| 8279 | GO_DNA_STRAND_ELONGATION                                    | -0.48 | 0.00 | 0 | 0 | 0 | not significant |
| 8280 | GO_PROTEIN_LOCALIZATION_TO_CILIARY_MEMBRANE                 | -0.48 | 0.00 | 0 | 0 | 0 | not significant |
| 8281 | GO_REGULATION_OF_RESPONSE_TO_FOOD                           | -0.48 | 0.00 | 0 | 0 | 0 | not significant |
| 8282 | GO_SEX_CHROMOSOME                                           | -0.48 | 0.00 | 0 | 0 | 0 | not significant |
| 8283 | GO_INTRACILIARY_TRANSPORT_PARTICLE                          | -0.47 | 0.01 | 0 | 0 | 0 | not significant |
| 8284 | GO_MITOCHONDRIAL_TRICARBOXYLIC_ACID_CYCLE_ENZYME_COMPLEX    | -0.47 | 0.01 | 0 | 0 | 0 | not significant |
| 8285 | REACTOME_RUNX2_REGULATES_GENES_INVOLVED_IN_CELL_MIGRATIO    | -0.47 | 0.01 | 0 | 0 | 0 | not significant |
| 8286 | GO_GENITALIA_MORPHOGENESIS                                  | -0.47 | 0.00 | 0 | 0 | 0 | not significant |
| 8287 | GO_MULTI_ORGANISM_BEHAVIOR                                  | -0.47 | 0.00 | 0 | 0 | 0 | not significant |
| 8288 | GO_PEPIDYL_PROLINE_DIOXYGENASE_ACTIVITY                     | -0.47 | 0.00 | 0 | 0 | 0 | not significant |
| 8289 | GO_PHOSPHATIDYLINOSITOL_3_KINASE_ACTIVITY                   | -0.47 | 0.00 | 0 | 0 | 0 | not significant |
| 8290 | GO_POSITIVE_REGULATION_OF_HISTONE_H4_ACETYLATION            | -0.47 | 0.00 | 0 | 0 | 0 | not significant |
| 8291 | REACTOME_INFLAMMASOMES                                      | -0.47 | 0.00 | 0 | 0 | 0 | not significant |
| 8292 | GO_3_5_DNA_HELICASE_ACTIVITY                                | -0.46 | 0.00 | 0 | 0 | 0 | not significant |
| 8293 | GO_REGULATION_OF_CENTRIOLE_REPLICATION                      | -0.46 | 0.00 | 0 | 0 | 0 | not significant |
| 8294 | GO_REGULATION_OF_MDA_5_SIGNALING_PATHWAY                    | -0.46 | 0.00 | 0 | 0 | 0 | not significant |
| 8295 | GO_CHROMATIN_SILENCING_COMPLEX                              | -0.44 | 0.00 | 0 | 0 | 0 | not significant |
| 8296 | GO_REGULATION_OF_B_CELL_RECEPTOR_SIGNALING_PATHWAY          | -0.44 | 0.00 | 0 | 0 | 0 | not significant |
| 8297 | GO_REGULATION_OF_NEURON_MATURATION                          | -0.44 | 0.00 | 0 | 0 | 0 | not significant |
| 8298 | PID_ERB_GENOMIC_PATHWAY                                     | -0.44 | 0.00 | 0 | 0 | 0 | not significant |
| 8299 | REACTOME_TBC_RABGAPS                                        | -0.44 | 0.00 | 0 | 0 | 0 | not significant |
| 8300 | GO_POSITIVE_REGULATION_OF KERATINOCYTE_DIFFERENTIATION      | -0.43 | 0.00 | 0 | 0 | 0 | not significant |
| 8301 | GO_REGULATION_OF_APPETITE                                   | -0.43 | 0.00 | 0 | 0 | 0 | not significant |
| 8302 | GO_GABA_ERGIC_SYNAPSE                                       | -0.42 | 0.00 | 0 | 0 | 0 | not significant |
| 8303 | GO_LYSOPHOSPHOLIPASE_ACTIVITY                               | -0.42 | 0.00 | 0 | 0 | 0 | not significant |
| 8304 | GO_NEGATIVE_REGULATION_OF_PROTEIN_POLYUBIQUITINATION        | -0.42 | 0.00 | 0 | 0 | 0 | not significant |
| 8305 | GO_MCM_COMPLEX                                              | -0.41 | 0.00 | 0 | 0 | 0 | not significant |
| 8306 | GO_NEGATIVE_REGULATION_OF_MYOSIN_LIGHT_CHAIN_PHOSPHATASE    | -0.41 | 0.00 | 0 | 0 | 0 | not significant |
| 8307 | REACTOME_ESTABLISHMENT_OF_SISTER_CHROMATID_COHESION         | -0.41 | 0.00 | 0 | 0 | 0 | not significant |
| 8308 | REACTOME_PROCESSIVE_SYNTHESIS_ON_THE_C_STRAND_OF_THE_TE     | -0.41 | 0.00 | 0 | 0 | 0 | not significant |
| 8309 | GO_PROTEIN_HEXAMERIZATION                                   | -0.40 | 0.00 | 0 | 0 | 0 | not significant |
| 8310 | GO_TUBULAR_ENDOSOME                                         | -0.40 | 0.00 | 0 | 0 | 0 | not significant |
| 8311 | GO_METHIONINE_METABOLIC_PROCESS                             | -0.39 | 0.00 | 0 | 0 | 0 | not significant |
| 8312 | GO_NUCLEAR_OUTER_MEMBRANE                                   | -0.39 | 0.00 | 0 | 0 | 0 | not significant |
| 8313 | REACTOME_DNA_STRAND_ELONGATION                              | -0.36 | 0.00 | 0 | 0 | 0 | not significant |
| 8314 | GO_PROTEIN_LOCALIZATION_TO_CELL_JUNCTION                    | -0.35 | 0.00 | 0 | 0 | 0 | not significant |
| 8315 | GO_MAINTENANCE_OF_SISTER_CHROMATID_COHESION                 | 0.34  | 0.00 | 0 | 0 | 0 | not significant |
| 8316 | GO_MISMATCH_REPAIR_COMPLEX_BINDING                          | 0.38  | 0.00 | 0 | 0 | 0 | not significant |
| 8317 | GO_CARD_DOMAIN_BINDING                                      | 0.39  | 0.00 | 0 | 0 | 0 | not significant |
| 8318 | GO_HISTONE_METHYLTRANSFERASE_ACTIVITY_H3_K27_SPECIFIC_      | 0.40  | 0.00 | 0 | 0 | 0 | not significant |
| 8319 | GO_MITOTIC_CHROMOSOME_CONDENSATION                          | 0.40  | 0.00 | 0 | 0 | 0 | not significant |
| 8320 | GO_NEGATIVE_REGULATION_OF_MUSCLE_ADAPTATION                 | 0.41  | 0.00 | 0 | 0 | 0 | not significant |
| 8321 | GO_POSITIVE_REGULATION_OF_AUTOPHAGY_OF_MITOCHONDRION        | 0.41  | 0.00 | 0 | 0 | 0 | not significant |
| 8322 | GO_REGULATION_OF_MITOCHONDRIAL_FUSION                       | 0.41  | 0.00 | 0 | 0 | 0 | not significant |
| 8323 | GO_MESSENGER_RIBONUCLEOPROTEIN_COMPLEX                      | 0.42  | 0.00 | 0 | 0 | 0 | not significant |
| 8324 | GO_MUTSALPHA_COMPLEX_BINDING                                | 0.42  | 0.00 | 0 | 0 | 0 | not significant |
| 8325 | GO_NEGATIVE_REGULATION_OF_HISTONE_H3_K9_TRIMETHYLATION      | 0.42  | 0.00 | 0 | 0 | 0 | not significant |
| 8326 | GO_OLIGOSACCHARIDE_BIOSYNTHETIC_PROCESS                     | 0.42  | 0.00 | 0 | 0 | 0 | not significant |
| 8327 | GO_PYRIMIDINE_NUCLEOTIDE_SALVAGE                            | 0.42  | 0.00 | 0 | 0 | 0 | not significant |
| 8328 | GO_REGULATION_OF_CILIUM_BEAT_FREQUENCY_INVOLVED_IN_CILIARY  | 0.42  | 0.00 | 0 | 0 | 0 | not significant |
| 8329 | GO_REGULATION_OF_PROTEIN_LOCALIZATION_TO_CILIUM             | 0.42  | 0.00 | 0 | 0 | 0 | not significant |
| 8330 | GO_SULFATE_TRANSPORT                                        | 0.42  | 0.00 | 0 | 0 | 0 | not significant |
| 8331 | GO_BRCA1_A_COMPLEX                                          | 0.43  | 0.00 | 0 | 0 | 0 | not significant |
| 8332 | GO_PHOTORECEPTOR_DISC_MEMBRANE                              | 0.43  | 0.00 | 0 | 0 | 0 | not significant |
| 8333 | GO_REGULATION_OF_MITOTIC_RECOMBINATION                      | 0.43  | 0.00 | 0 | 0 | 0 | not significant |
| 8334 | REACTOME_APOPTIC_CLEAVAGE_OF_CELLULAR_PROTEINS              | 0.43  | 0.00 | 0 | 0 | 0 | not significant |
| 8335 | GO_INTRASPECIES_INTERACTION_BETWEEN_ORGANISMS               | 0.44  | 0.00 | 0 | 0 | 0 | not significant |
| 8336 | GO_NEGATIVE_REGULATION_OF_HISTONE_METHYLATION               | 0.44  | 0.00 | 0 | 0 | 0 | not significant |
| 8337 | ONGUSAHA_BRCA1_TARGETS_DN                                   | 0.44  | 0.00 | 0 | 0 | 0 | not significant |
| 8338 | BILD_CTNB1_ONCOGENIC_SIGNATURE                              | 0.45  | 0.00 | 0 | 0 | 0 | not significant |
| 8339 | GO_ACYL_COA_DEHYDROGENASE_ACTIVITY                          | 0.45  | 0.00 | 0 | 0 | 0 | not significant |
| 8340 | GO_ATP_DEPENDENT_MICROTUBULE_MOTOR_ACTIVITY_MINUS_END_DII   | 0.45  | 0.00 | 0 | 0 | 0 | not significant |
| 8341 | GO_CELL_CELL_ADHESION_INVOLVED_IN_GASTRULATION              | 0.45  | 0.00 | 0 | 0 | 0 | not significant |
| 8342 | GO_CHOLINE_TRANSPORT                                        | 0.45  | 0.00 | 0 | 0 | 0 | not significant |
| 8343 | GO_INSULIN_RESPONSIVE_COMPARTMENT                           | 0.45  | 0.00 | 0 | 0 | 0 | not significant |
| 8344 | GO_NEGATIVE_REGULATION_OF_HISTONE_MODIFICATION              | 0.45  | 0.00 | 0 | 0 | 0 | not significant |
| 8345 | GO_REPLICATION_FORK_PROCESSING                              | 0.45  | 0.00 | 0 | 0 | 0 | not significant |
| 8346 | GO_3_PHOSPHOADENOSINE_5_PHOSPHOSULFATE_METABOLIC_PROCEI     | 0.46  | 0.01 | 0 | 0 | 0 | not significant |
| 8347 | GO_OXIDOREDUCTASE_ACTIVITY_ACTING_ON_SINGLE_DONORS_WITH_I   | 0.46  | 0.01 | 0 | 0 | 0 | not significant |
| 8348 | GO_HETEROCHROMATIN_ORGANIZATION                             | 0.46  | 0.00 | 0 | 0 | 0 | not significant |
| 8349 | GO_REGULATION_OF_INTERLEUKIN_2_SECRETION                    | 0.46  | 0.00 | 0 | 0 | 0 | not significant |
| 8350 | GO_REGULATION_OF_WATER_LOSS_VIA_SKIN                        | 0.46  | 0.00 | 0 | 0 | 0 | not significant |
| 8351 | GO_REPLISOME                                                | 0.46  | 0.00 | 0 | 0 | 0 | not significant |
| 8352 | GO_SYNTAXIN_1_BINDING                                       | 0.46  | 0.00 | 0 | 0 | 0 | not significant |
| 8353 | GO_UDP_N_ACETYLGLUCOSAMINE_METABOLIC_PROCESS                | 0.46  | 0.00 | 0 | 0 | 0 | not significant |
| 8354 | REACTOME_ATTACHMENT_OF_GPI_ANCHOR_TO_UPAR                   | 0.46  | 0.00 | 0 | 0 | 0 | not significant |
| 8355 | REACTOME_PECAM1_INTERACTIONS                                | 0.46  | 0.00 | 0 | 0 | 0 | not significant |
| 8356 | GO_AUDITORY_RECEPTOR_CELL_MORPHOGENESIS                     | 0.47  | 0.01 | 0 | 0 | 0 | not significant |
| 8357 | GO_CENTROMERIC_DNA_BINDING                                  | 0.47  | 0.01 | 0 | 0 | 0 | not significant |
| 8358 | GO_CIRCADIAN_SLEEP_WAKE_CYCLE                               | 0.47  | 0.01 | 0 | 0 | 0 | not significant |
| 8359 | GO_PLATELET_ALPHA_GRANULE_MEMBRANE                          | 0.47  | 0.01 | 0 | 0 | 0 | not significant |
| 8360 | GO_POSITIVE_REGULATION_OF_GLUKOKINASE_ACTIVITY              | 0.47  | 0.00 | 0 | 0 | 0 | not significant |
| 8361 | GO_POSITIVE_REGULATION_OF_HEXOKINASE_ACTIVITY               | 0.47  | 0.00 | 0 | 0 | 0 | not significant |
| 8362 | GO_SULFATE_TRANSMEMBRANE_TRANSPORTER_ACTIVITY               | 0.47  | 0.00 | 0 | 0 | 0 | not significant |
| 8363 | GO_SYMMETRIC_SYNAPSE                                        | 0.47  | 0.00 | 0 | 0 | 0 | not significant |
| 8364 | ELLWOOD_MYC_TARGETS_UP                                      | 0.48  | 0.01 | 0 | 0 | 0 | not significant |
| 8365 | GO_ASYMMETRIC_STEM_CELL_DIVISION                            | 0.48  | 0.01 | 0 | 0 | 0 | not significant |
| 8366 | GO_CARDIOLIPIN_METABOLIC_PROCESS                            | 0.48  | 0.01 | 0 | 0 | 0 | not significant |
| 8367 | GO_HISTONE_METHYLTRANSFERASE_ACTIVITY_H3_K4_SPECIFIC_       | 0.48  | 0.01 | 0 | 0 | 0 | not significant |
| 8368 | GO_CELL_CELL_JUNCTION_MAINTENANCE                           | 0.48  | 0.00 | 0 | 0 | 0 | not significant |
| 8369 | GO_NEGATIVE_REGULATION_OF_VIRAL_RELEASE_FROM_HOST_CELL      | 0.48  | 0.00 | 0 | 0 | 0 | not significant |
| 8370 | GO_REGULATION_OF_HISTONE_H3_K9_TRIMETHYLATION               | 0.48  | 0.00 | 0 | 0 | 0 | not significant |
| 8371 | GO_REGULATION_OF_PROTEIN_POLYUBIQUITINATION                 | 0.48  | 0.00 | 0 | 0 | 0 | not significant |
| 8372 | GO_CUL4A_RING_E3_UBIQUITIN_LIGASE_COMPLEX                   | 0.49  | 0.01 | 0 | 0 | 0 | not significant |
| 8373 | GO_FUCOSYLTRANSFERASE_ACTIVITY                              | 0.49  | 0.01 | 0 | 0 | 0 | not significant |
| 8374 | GO_MIRNA_METABOLIC_PROCESS                                  | 0.49  | 0.01 | 0 | 0 | 0 | not significant |
| 8375 | GO_POSITIVE_REGULATION_OF_EXTRACELLULAR_MATRIX_ORGANIZATI   | 0.49  | 0.01 | 0 | 0 | 0 | not significant |
| 8376 | GO_PROTEIN_O_LINKED_MANNOSYLATION                           | 0.49  | 0.01 | 0 | 0 | 0 | not significant |
| 8377 | GO_FLEMMING_BODY                                            | 0.49  | 0.00 | 0 | 0 | 0 | not significant |
| 8378 | GO_HEPARAN_SULFATE_PROTEOGLYCAN_METABOLIC_PROCESS           | 0.49  | 0.00 | 0 | 0 | 0 | not significant |
| 8379 | GO_NEGATIVE_REGULATION_OF_MRNA_3_END_PROCESSING             | 0.49  | 0.00 | 0 | 0 | 0 | not significant |
| 8380 | REACTOME_GAP_FILLING_DNA_REPAIR_SYNTHESIS_AND_LIGATION_IN_C | 0.49  | 0.00 | 0 | 0 | 0 | not significant |
| 8381 | REACTOME_LAGGING_STRAND_SYNTHESIS                           | 0.49  | 0.00 | 0 | 0 | 0 | not significant |

|      |                                                           |      |      |   |   |   |                 |
|------|-----------------------------------------------------------|------|------|---|---|---|-----------------|
| 8382 | BIOCARTA_SAM68_PATHWAY                                    | 0.50 | 0.01 | 0 | 0 | 0 | not significant |
| 8383 | GO_BETA_2_ADRENERGIC_RECEPTOR_BINDING                     | 0.50 | 0.01 | 0 | 0 | 0 | not significant |
| 8384 | GO_CAVEOLIN_MEDIATED_ENDOCYTOSIS                          | 0.50 | 0.01 | 0 | 0 | 0 | not significant |
| 8385 | GO_NEURON_FATE_SPECIFICATION                              | 0.50 | 0.01 | 0 | 0 | 0 | not significant |
| 8386 | GO_PERINUCLEAR_ENDOPLASMIC_RETICULUM                      | 0.50 | 0.01 | 0 | 0 | 0 | not significant |
| 8387 | GO_PROTEIN_LOCALIZATION_TO_ENDOSOME                       | 0.50 | 0.01 | 0 | 0 | 0 | not significant |
| 8388 | GO_TELOMERIC_LOOP_DISASSEMBLY                             | 0.50 | 0.01 | 0 | 0 | 0 | not significant |
| 8389 | GO_XENOPHAGY                                              | 0.50 | 0.01 | 0 | 0 | 0 | not significant |
| 8390 | REACTOME_BETA_OXIDATION_OF_OCTANOYL_COA_TO_HEXANOYL_CO    | 0.50 | 0.01 | 0 | 0 | 0 | not significant |
| 8391 | REACTOME_COHESIN_LOADING_ONTO_CHROMATIN                   | 0.50 | 0.01 | 0 | 0 | 0 | not significant |
| 8392 | REACTOME_VITAMIN_D_CALCIFEROL_METABOLISM                  | 0.50 | 0.01 | 0 | 0 | 0 | not significant |
| 8393 | CHR13Q34                                                  | 0.50 | 0.00 | 0 | 0 | 0 | not significant |
| 8394 | GO_R_SMAD_BINDING                                         | 0.50 | 0.00 | 0 | 0 | 0 | not significant |
| 8395 | GO_AMINO_ACID_SALVAGE                                     | 0.51 | 0.02 | 0 | 0 | 0 | not significant |
| 8396 | GO_ATP_DEPENDENT_3_5_DNA_HELICASE_ACTIVITY                | 0.51 | 0.01 | 0 | 0 | 0 | not significant |
| 8397 | GO_AUDITORY_RECEPTOR_CELL_STEREOCILUM_ORGANIZATION        | 0.51 | 0.01 | 0 | 0 | 0 | not significant |
| 8398 | GO_L_METHIONINE_SALVAGE_FROM_METHYLTHIOADENOSINE          | 0.51 | 0.01 | 0 | 0 | 0 | not significant |
| 8399 | GO_POSITIVE_REGULATION_OF_AUTOPHAGOSOME_MATURATION        | 0.51 | 0.01 | 0 | 0 | 0 | not significant |
| 8400 | GO_PURINE_DEOXYRIBONUCLEOTIDE_CATABOLIC_PROCESS           | 0.51 | 0.01 | 0 | 0 | 0 | not significant |
| 8401 | GO_REGULATION_OF_FERTILIZATION                            | 0.51 | 0.01 | 0 | 0 | 0 | not significant |
| 8402 | GO_REGULATION_OF_HISTONE_H3_K9_METHYLATION                | 0.51 | 0.01 | 0 | 0 | 0 | not significant |
| 8403 | REACTOME_NEGATIVE_FEEDBACK_REGULATION_OF_MAPK_PATHWAY     | 0.51 | 0.01 | 0 | 0 | 0 | not significant |
| 8404 | REACTOME_PROTON_COUPLED_MONOCARBOXYLATE_TRANSPORT         | 0.51 | 0.01 | 0 | 0 | 0 | not significant |
| 8405 | GO_DNA_DAMAGE_RESPONSE_DETECTION_OF_DNA_DAMAGE            | 0.51 | 0.00 | 0 | 0 | 0 | not significant |
| 8406 | GO_HISTONE_LYSINE_N_METHYLTRANSFERASE_ACTIVITY            | 0.51 | 0.00 | 0 | 0 | 0 | not significant |
| 8407 | GO_PEROXISOMAL_MEMBRANE_TRANSPORT                         | 0.51 | 0.00 | 0 | 0 | 0 | not significant |
| 8408 | PID_ERBB1_RECEPTOR_PROXIMAL_PATHWAY                       | 0.51 | 0.00 | 0 | 0 | 0 | not significant |
| 8409 | GO_D1_DOPAMINE_RECEPTOR_BINDING                           | 0.52 | 0.02 | 0 | 0 | 0 | not significant |
| 8410 | GO_NEGATIVE_REGULATION_OF_EXTRACELLULAR_MATRIX_ORGANIZAT  | 0.52 | 0.02 | 0 | 0 | 0 | not significant |
| 8411 | GO_REGULATION_OF_CELL_CELL_ADHESION_MEDIATED_BY_INTEGRIN  | 0.52 | 0.02 | 0 | 0 | 0 | not significant |
| 8412 | CHR7Q33                                                   | 0.52 | 0.01 | 0 | 0 | 0 | not significant |
| 8413 | GO_PEPTIDYL_THREONINE_DEPHOSPHORYLATION                   | 0.52 | 0.01 | 0 | 0 | 0 | not significant |
| 8414 | GO_POSITIVE_REGULATION_OF_ERBB_SIGNALING_PATHWAY          | 0.52 | 0.01 | 0 | 0 | 0 | not significant |
| 8415 | GO_POSITIVE_REGULATION_OF_MACROPHAGE_MIGRATION            | 0.52 | 0.01 | 0 | 0 | 0 | not significant |
| 8416 | GO_RESPONSE_TO_STIMULUS_INVOLVED_IN_REGULATION_OF_MUSCLE  | 0.52 | 0.01 | 0 | 0 | 0 | not significant |
| 8417 | REACTOME_ALPHA_OXIDATION_OF_PHTANATE                      | 0.52 | 0.01 | 0 | 0 | 0 | not significant |
| 8418 | GO_PHOSPHATIDYLINOSITOL_METABOLIC_PROCESS                 | 0.52 | 0.00 | 0 | 0 | 0 | not significant |
| 8419 | LEE_CALORIE_RESTRICTION_NEOCORTEX_UP                      | 0.52 | 0.00 | 0 | 0 | 0 | not significant |
| 8420 | SCHIEDEREIT_IKK_TARGETS                                   | 0.52 | 0.00 | 0 | 0 | 0 | not significant |
| 8421 | GO_GPI_ANCHOR_TRANSAMIDASE_ACTIVITY                       | 0.53 | 0.02 | 0 | 0 | 0 | not significant |
| 8422 | GO_RNA_DNA_HYBRID_RIBONUCLEASE_ACTIVITY                   | 0.53 | 0.02 | 0 | 0 | 0 | not significant |
| 8423 | ASGHARZADEH_NEUROBLASTOMA_POOR_SURVIVAL_DN                | 0.53 | 0.01 | 0 | 0 | 0 | not significant |
| 8424 | GARGALOVIC_RESPONSE_TO_OXIDIZED_PHOSPHOLIPIDS_YELLOW_UP   | 0.53 | 0.01 | 0 | 0 | 0 | not significant |
| 8425 | GO_DYNEIN_HEAVY_CHAIN_BINDING                             | 0.53 | 0.01 | 0 | 0 | 0 | not significant |
| 8426 | GO_ENDONUCLEASE_ACTIVITY_WITH_EITHER_RIBO_OR_DEOXY        | 0.53 | 0.01 | 0 | 0 | 0 | not significant |
| 8427 | GO_NEGATIVE_REGULATION_OF_TYPE_I_INTERFERON_MEDIATED_SIGN | 0.53 | 0.01 | 0 | 0 | 0 | not significant |
| 8428 | GO_POSITIVE_REGULATION_OF_TOLERANCE_INDUCION              | 0.53 | 0.01 | 0 | 0 | 0 | not significant |
| 8429 | GO_SIN3_COMPLEX                                           | 0.53 | 0.01 | 0 | 0 | 0 | not significant |
| 8430 | GO_TRICARBOXYLIC_ACID_CYCLE_ENZYME_COMPLEX                | 0.53 | 0.01 | 0 | 0 | 0 | not significant |
| 8431 | REACTOME_LEADING_STRAND_SYNTHESIS                         | 0.53 | 0.01 | 0 | 0 | 0 | not significant |
| 8432 | REACTOME_PROCESSIVE_SYNTHESIS_ON_THE_LAGGING_STRAND       | 0.53 | 0.01 | 0 | 0 | 0 | not significant |
| 8433 | REACTOME_RETROGRADE_TRANSPORT_AT_THE_TRANS_GOLGI_NETW     | 0.53 | 0.00 | 0 | 0 | 0 | not significant |
| 8434 | GO_PRE_MRNA_3_SPLICE_SITE_BINDING                         | 0.54 | 0.03 | 0 | 0 | 0 | not significant |
| 8435 | CHR11Q25                                                  | 0.54 | 0.02 | 0 | 0 | 0 | not significant |
| 8436 | GO_COLLAGEN_METABOLIC_PROCESS                             | 0.54 | 0.02 | 0 | 0 | 0 | not significant |
| 8437 | GO_EMBRYONIC_BODY_MORPHOGENESIS                           | 0.54 | 0.02 | 0 | 0 | 0 | not significant |
| 8438 | GO_GPI_ANCHOR_TRANSAMIDASE_COMPLEX                        | 0.54 | 0.02 | 0 | 0 | 0 | not significant |
| 8439 | GO_MACROPHAGE_CYTOKINE_PRODUCTION                         | 0.54 | 0.02 | 0 | 0 | 0 | not significant |
| 8440 | GO_PEPTIDYL_LYSINE_DEACETYLATION                          | 0.54 | 0.02 | 0 | 0 | 0 | not significant |
| 8441 | GO_PROTEIN_PHOSPHATASE_1_BINDING                          | 0.54 | 0.02 | 0 | 0 | 0 | not significant |
| 8442 | GO_RNA_POLYMERASE_1_PREINITIATION_COMPLEX_ASSEMBLY        | 0.54 | 0.02 | 0 | 0 | 0 | not significant |
| 8443 | MCCABE_HOXC6_TARGETS_UP                                   | 0.54 | 0.02 | 0 | 0 | 0 | not significant |
| 8444 | GO_HISTONE_H3_K9_TRIMETHYLATION                           | 0.54 | 0.01 | 0 | 0 | 0 | not significant |
| 8445 | GO_NEGATIVE_REGULATION_OF_ALCOHOL_BIOSYNTHETIC_PROCESS    | 0.54 | 0.01 | 0 | 0 | 0 | not significant |
| 8446 | GO_REGULATION_OF_EARLY_ENDOSOME_TO_LATE_ENDOSOME_TRAN     | 0.54 | 0.01 | 0 | 0 | 0 | not significant |
| 8447 | REACTOME_BETA_OXIDATION_OF_HEXANOYL_COA_TO_BUTANOYL_CO/   | 0.54 | 0.01 | 0 | 0 | 0 | not significant |
| 8448 | REACTOME_SPRY_REGULATION_OF_FGF_SIGNALING                 | 0.54 | 0.01 | 0 | 0 | 0 | not significant |
| 8449 | CHR3Q26                                                   | 0.54 | 0.00 | 0 | 0 | 0 | not significant |
| 8450 | GO_LYSINE_N_METHYLTRANSFERASE_ACTIVITY                    | 0.54 | 0.00 | 0 | 0 | 0 | not significant |
| 8451 | NIKOLSKY_MUTATED_AND_AMPLIFIED_IN_BREAST_CANCER           | 0.54 | 0.00 | 0 | 0 | 0 | not significant |
| 8452 | GO_ELONGATOR_HOLOENZYME_COMPLEX                           | 0.55 | 0.02 | 0 | 0 | 0 | not significant |
| 8453 | GO_EMBRYONIC_RETINA_MORPHOGENESIS_IN_CAMERA_TYPE_EYE      | 0.55 | 0.02 | 0 | 0 | 0 | not significant |
| 8454 | GO_REGULATION_OF_METHYLATION_DEPENDENT_CHROMATIN_SILENCI  | 0.55 | 0.02 | 0 | 0 | 0 | not significant |
| 8455 | GO_TELOMERIC_D_LOOP_DISASSEMBLY                           | 0.55 | 0.02 | 0 | 0 | 0 | not significant |
| 8456 | BIOCARTA_DEATH_PATHWAY                                    | 0.55 | 0.01 | 0 | 0 | 0 | not significant |
| 8457 | GO_NEGATIVE_REGULATION_OF_TRANSCRIPTION_REGULATORY_REGIC  | 0.55 | 0.01 | 0 | 0 | 0 | not significant |
| 8458 | GO_POSITIVE_REGULATION_OF_NEUROLOGICAL_SYSTEM_PROCESS     | 0.55 | 0.01 | 0 | 0 | 0 | not significant |
| 8459 | GO_REGULATION_OF_HISTONE_H3_K4_METHYLATION                | 0.55 | 0.01 | 0 | 0 | 0 | not significant |
| 8460 | KRAS_50_UP_V1_DN                                          | 0.55 | 0.01 | 0 | 0 | 0 | not significant |
| 8461 | REACTOME_REGULATION_OF_MECP2_EXPRESSION_AND_ACTIVITY      | 0.55 | 0.01 | 0 | 0 | 0 | not significant |
| 8462 | GO_MORPHOGENESIS_OF_AN_EPITHELIAL_SHEET                   | 0.55 | 0.00 | 0 | 0 | 0 | not significant |
| 8463 | GO_PEPTIDE_N_ACETYLTTRANSFERASE_ACTIVITY                  | 0.55 | 0.00 | 0 | 0 | 0 | not significant |
| 8464 | REACTOME_RAB_REGULATION_OF_TRAFFICKING                    | 0.55 | 0.00 | 0 | 0 | 0 | not significant |
| 8465 | GO_CYCLOHYDROLASE_ACTIVITY                                | 0.56 | 0.03 | 0 | 0 | 0 | not significant |
| 8466 | GO_NPBAF_COMPLEX                                          | 0.56 | 0.03 | 0 | 0 | 0 | not significant |
| 8467 | GO_OXIDOREDUCTASE_ACTIVITY_ACTING_ON_THE_CH_CH_GROUP_OF   | 0.56 | 0.03 | 0 | 0 | 0 | not significant |
| 8468 | LIU_TARGETS_OF_VMVB_VS_CMYB_UP                            | 0.56 | 0.03 | 0 | 0 | 0 | not significant |
| 8469 | REACTOME_PI5P_REGULATES_TP53_ACETYLATION                  | 0.56 | 0.03 | 0 | 0 | 0 | not significant |
| 8470 | DAVIES_MULTIPLE_MYELOMA_VS_MGUS_UP                        | 0.56 | 0.02 | 0 | 0 | 0 | not significant |
| 8471 | GO_ATTACHMENT_OF_GPI_ANCHOR_TO_PROTEIN                    | 0.56 | 0.02 | 0 | 0 | 0 | not significant |
| 8472 | GO_CATION_CATION_ANTIPORTER_ACTIVITY                      | 0.56 | 0.02 | 0 | 0 | 0 | not significant |
| 8473 | GO_GTPASE_INHIBITOR_ACTIVITY                              | 0.56 | 0.02 | 0 | 0 | 0 | not significant |
| 8474 | GO_LARGE_RIBOSOMAL_SUBUNIT_RRNA_BINDING                   | 0.56 | 0.02 | 0 | 0 | 0 | not significant |
| 8475 | GO_NEGATIVE_REGULATION_OF_OXIDOREDUCTASE_ACTIVITY         | 0.56 | 0.02 | 0 | 0 | 0 | not significant |
| 8476 | GO_NEUROTRANSMITTER_RECEPTOR_LOCALIZATION_TO_POSTSYNAPT   | 0.56 | 0.02 | 0 | 0 | 0 | not significant |
| 8477 | GO_PHOSPHATIDYLGLYCEROL_BINDING                           | 0.56 | 0.02 | 0 | 0 | 0 | not significant |
| 8478 | GO_PHOSPHATIDYLINOSITOL_4_5_BISPHOSPHATE_PHOSPHATASE_ACTI | 0.56 | 0.02 | 0 | 0 | 0 | not significant |
| 8479 | GO_PHOTORECEPTOR_OUTER_SEGMENT_MEMBRANE                   | 0.56 | 0.02 | 0 | 0 | 0 | not significant |
| 8480 | GO_REGULATION_OF_EXTRACELLULAR_MATRIX_ASSEMBLY            | 0.56 | 0.02 | 0 | 0 | 0 | not significant |
| 8481 | REACTOME_CREB_PHOSPHORYLATION                             | 0.56 | 0.02 | 0 | 0 | 0 | not significant |
| 8482 | VISALA_AGING_LYMPHOCYTE_DN                                | 0.56 | 0.02 | 0 | 0 | 0 | not significant |
| 8483 | ZAIDI_OSTEOBLAST_TRANSCRIPTION_FACTORS                    | 0.56 | 0.02 | 0 | 0 | 0 | not significant |
| 8484 | GO_SOLUTE_CATION_ANTIPORTER_ACTIVITY                      | 0.56 | 0.01 | 0 | 0 | 0 | not significant |
| 8485 | TOMLINS_PROSTATE_CANCER_UP                                | 0.56 | 0.01 | 0 | 0 | 0 | not significant |
| 8486 | ODONNELL_METASTASIS_UP                                    | 0.56 | 0.00 | 0 | 0 | 0 | not significant |
| 8487 | PID_FANCONI_PATHWAY                                       | 0.56 | 0.00 | 0 | 0 | 0 | not significant |
| 8488 | GO_MYOSIN_II_COMPLEX                                      | 0.57 | 0.03 | 0 | 0 | 0 | not significant |
| 8489 | GO_POSITIVE_REGULATION_OF_COAGULATION                     | 0.57 | 0.03 | 0 | 0 | 0 | not significant |
| 8490 | NIELSEN_LIPOSARCOMA_DN                                    | 0.57 | 0.03 | 0 | 0 | 0 | not significant |

|      |                                                                           |      |      |   |   |   |                 |
|------|---------------------------------------------------------------------------|------|------|---|---|---|-----------------|
| 8491 | REACTOME_DNA_REPLICATION_INITIATION                                       | 0.57 | 0.03 | 0 | 0 | 0 | not significant |
| 8492 | BIOCARTA_PTDINS_PATHWAY                                                   | 0.57 | 0.02 | 0 | 0 | 0 | not significant |
| 8493 | GO_CYCLIN_CDK_POSITIVE_TRANSCRIPTION_ELONGATION_FACTOR_CC                 | 0.57 | 0.02 | 0 | 0 | 0 | not significant |
| 8494 | GO_DECIDUALIZATION                                                        | 0.57 | 0.02 | 0 | 0 | 0 | not significant |
| 8495 | GO_FOUR_WAY_JUNCTION_DNA_BINDING                                          | 0.57 | 0.02 | 0 | 0 | 0 | not significant |
| 8496 | GO_INTRA_S_DNA_DAMAGE_CHECKPOINT                                          | 0.57 | 0.02 | 0 | 0 | 0 | not significant |
| 8497 | GO_NEGATIVE_REGULATION_BY_HOST_OF_VIRAL_TRANSCRIPTION                     | 0.57 | 0.02 | 0 | 0 | 0 | not significant |
| 8498 | GO_NEGATIVE_REGULATION_OF_BIOMINERAL_TISSUE_DEVELOPMENT                   | 0.57 | 0.02 | 0 | 0 | 0 | not significant |
| 8499 | GO_POSITIVE_REGULATION_OF_MYOTUBE_DIFFERENTIATION                         | 0.57 | 0.02 | 0 | 0 | 0 | not significant |
| 8500 | GO_PROTEIN_CATABOLIC_PROCESS_IN_THE_VACUOLE                               | 0.57 | 0.02 | 0 | 0 | 0 | not significant |
| 8501 | GO_REPLACEMENT_OSSIFICATION                                               | 0.57 | 0.02 | 0 | 0 | 0 | not significant |
| 8502 | GO_SECONDARY_LYSOSOME                                                     | 0.57 | 0.02 | 0 | 0 | 0 | not significant |
| 8503 | WORSSCHECH_TUMOR_REJECTION_UP                                             | 0.57 | 0.02 | 0 | 0 | 0 | not significant |
| 8504 | CHR9Q32                                                                   | 0.57 | 0.01 | 0 | 0 | 0 | not significant |
| 8505 | GO_COPI_COATED_VESICLE                                                    | 0.57 | 0.01 | 0 | 0 | 0 | not significant |
| 8506 | GO_GOLGI_TO_PLASMA_MEMBRANE_TRANSPORT                                     | 0.57 | 0.01 | 0 | 0 | 0 | not significant |
| 8507 | GO_PIGMENT_GNANULE_ORGANIZATION                                           | 0.57 | 0.01 | 0 | 0 | 0 | not significant |
| 8508 | GO_ENDOPLASMIC_RETICULUM_ORGANIZATION                                     | 0.57 | 0.00 | 0 | 0 | 0 | not significant |
| 8509 | GO_APICAL_DENDRITE                                                        | 0.58 | 0.03 | 0 | 0 | 0 | not significant |
| 8510 | GO_APICAL_PROTEIN_LOCALIZATION                                            | 0.58 | 0.03 | 0 | 0 | 0 | not significant |
| 8511 | GO_BRANCHING_INVOLVED_IN_BLOOD_VESSEL_MORPHOGENESIS                       | 0.58 | 0.03 | 0 | 0 | 0 | not significant |
| 8512 | GO_EPOXIDE_HYDROLASE_ACTIVITY                                             | 0.58 | 0.03 | 0 | 0 | 0 | not significant |
| 8513 | GO_GLIAL_CELL_APOPTOTIC_PROCESS                                           | 0.58 | 0.03 | 0 | 0 | 0 | not significant |
| 8514 | GO_ISWI_TYPE_COMPLEX                                                      | 0.58 | 0.03 | 0 | 0 | 0 | not significant |
| 8515 | GO_PEROXISOME_PROLIFERATOR_ACTIVATED_RECEPTOR_BINDING                     | 0.58 | 0.03 | 0 | 0 | 0 | not significant |
| 8516 | GO_RRNA_BASE_METHYLATION                                                  | 0.58 | 0.03 | 0 | 0 | 0 | not significant |
| 8517 | GO_VESICLE_TETHERING                                                      | 0.58 | 0.03 | 0 | 0 | 0 | not significant |
| 8518 | GU_PDEF_TARGETS_DN                                                        | 0.58 | 0.03 | 0 | 0 | 0 | not significant |
| 8519 | BIOCARTA_HBX_PATHWAY                                                      | 0.58 | 0.02 | 0 | 0 | 0 | not significant |
| 8520 | CHR4Q13                                                                   | 0.58 | 0.02 | 0 | 0 | 0 | not significant |
| 8521 | GO_INOSITOL_PHOSPHATE_CATABOLIC_PROCESS                                   | 0.58 | 0.02 | 0 | 0 | 0 | not significant |
| 8522 | GO_INSULIN_RECEPTOR_SUBSTRATE_BINDING                                     | 0.58 | 0.02 | 0 | 0 | 0 | not significant |
| 8523 | GO_METHYLATION_DEPENDENT_CHROMATIN_SILENCING                              | 0.58 | 0.02 | 0 | 0 | 0 | not significant |
| 8524 | GO_POSITIVE_REGULATION_OF_MUSCLE_CELL_APOPTOTIC_PROCESS                   | 0.58 | 0.02 | 0 | 0 | 0 | not significant |
| 8525 | GO_PROTEIN_LIPID_COMPLEX_ASSEMBLY                                         | 0.58 | 0.02 | 0 | 0 | 0 | not significant |
| 8526 | GO_REGULATION_OF_FATTY_ACID_BETA_OXIDATION                                | 0.58 | 0.02 | 0 | 0 | 0 | not significant |
| 8527 | PID_IL8_CXCR1_PATHWAY                                                     | 0.58 | 0.02 | 0 | 0 | 0 | not significant |
| 8528 | CHARETTI_T_ALL_RELAPSE_PROGNOSIS                                          | 0.58 | 0.01 | 0 | 0 | 0 | not significant |
| 8529 | FLECHNER_PBL_KIDNEY_TRANSPLANT_REJECTED_VS_OK_DN                          | 0.58 | 0.01 | 0 | 0 | 0 | not significant |
| 8530 | GO_CYCLIN_DEPENDENT_PROTEIN_KINASE_ACTIVITY                               | 0.58 | 0.01 | 0 | 0 | 0 | not significant |
| 8531 | CHR1Q24                                                                   | 0.58 | 0.00 | 0 | 0 | 0 | not significant |
| 8532 | GO_NEGATIVE_REGULATION_OF_AUTOPHAGY                                       | 0.58 | 0.00 | 0 | 0 | 0 | not significant |
| 8533 | KEGG_NEUROTROPIN_SIGNALING_PATHWAY                                        | 0.58 | 0.00 | 0 | 0 | 0 | not significant |
| 8534 | KEGG_PANCREATIC_CANCER                                                    | 0.58 | 0.00 | 0 | 0 | 0 | not significant |
| 8535 | GO_NEUROTRANSMITTER_REUPTAKE                                              | 0.59 | 0.04 | 0 | 0 | 0 | not significant |
| 8536 | CHN_BREAST_CANCER_COPY_NUMBER_DN                                          | 0.59 | 0.03 | 0 | 0 | 0 | not significant |
| 8537 | CHR10P14                                                                  | 0.59 | 0.03 | 0 | 0 | 0 | not significant |
| 8538 | GO_DNA_REPLICATION_SYNTHESIS_OF_RNA_PRIMER                                | 0.59 | 0.03 | 0 | 0 | 0 | not significant |
| 8539 | GO_ORGANIC_CATION_TRANSMEMBRANE_TRANSPORTER_ACTIVITY                      | 0.59 | 0.03 | 0 | 0 | 0 | not significant |
| 8540 | GO_POSITIVE_REGULATION_OF_CREB_TRANSCRIPTION_FACTOR_ACTIVATION            | 0.59 | 0.03 | 0 | 0 | 0 | not significant |
| 8541 | GO_POSITIVE_REGULATION_OF_METHYLATION_DEPENDENT_CHROMATIN_SILENCING       | 0.59 | 0.03 | 0 | 0 | 0 | not significant |
| 8542 | GO_POSITIVE_REGULATION_OF_SMOOTH_MUSCLE_CELL_APOPTOTIC_PROCESS            | 0.59 | 0.03 | 0 | 0 | 0 | not significant |
| 8543 | GO_PYRIDINE_NUCLEOSIDE_TRIPHOSPHATE_BIOSYNTHETIC_PROCESS                  | 0.59 | 0.03 | 0 | 0 | 0 | not significant |
| 8544 | IZUKA_LIVER_CANCER_PROGRESSION_G2_G3_DN                                   | 0.59 | 0.03 | 0 | 0 | 0 | not significant |
| 8545 | GO_FORMATION_OF_EXTRACHROMOSOMAL_CIRCULAR_DNA                             | 0.59 | 0.02 | 0 | 0 | 0 | not significant |
| 8546 | GO_MISMATCH_REPAIR_COMPLEX                                                | 0.59 | 0.02 | 0 | 0 | 0 | not significant |
| 8547 | GO_PHOSPHATIDYLGLYCEROL_METABOLIC_PROCESS                                 | 0.59 | 0.02 | 0 | 0 | 0 | not significant |
| 8548 | GO_PIGMENT_CELL_DIFFERENTIATION                                           | 0.59 | 0.02 | 0 | 0 | 0 | not significant |
| 8549 | GO_POSITIVE_REGULATION_OF_BLOOD_CIRCULATION                               | 0.59 | 0.02 | 0 | 0 | 0 | not significant |
| 8550 | GO_REGULATION_OF_MAST_CELL_ACTIVATION_INVOLVED_IN_IMMUNE_RESPONSE         | 0.59 | 0.02 | 0 | 0 | 0 | not significant |
| 8551 | GROSS_HYPOXIA_VIA_ELK3_ONLY_UP                                            | 0.59 | 0.02 | 0 | 0 | 0 | not significant |
| 8552 | REACTOME_REGULATION_OF_SIGNALING_BY_CBL                                   | 0.59 | 0.02 | 0 | 0 | 0 | not significant |
| 8553 | GO_CELLULAR_IRON_ION_HOMEOSTASIS                                          | 0.59 | 0.01 | 0 | 0 | 0 | not significant |
| 8554 | GO_NUCLEOTIDE_EXCISION_REPAIR_DNA_GAP_FILLING                             | 0.59 | 0.01 | 0 | 0 | 0 | not significant |
| 8555 | GO_OOCYTE_DIFFERENTIATION                                                 | 0.59 | 0.01 | 0 | 0 | 0 | not significant |
| 8556 | GO_ENDOSOMAL_TRANSPORT                                                    | 0.59 | 0.00 | 0 | 0 | 0 | not significant |
| 8557 | GO_LIPID_PHOSPHORYLATION                                                  | 0.59 | 0.00 | 0 | 0 | 0 | not significant |
| 8558 | GO_TRANS_GOLGI_NETWORK_MEMBRANE                                           | 0.59 | 0.00 | 0 | 0 | 0 | not significant |
| 8559 | KEGG_ALPHA_LINOLENIC_ACID_METABOLISM                                      | 0.60 | 0.05 | 0 | 0 | 0 | not significant |
| 8560 | GO_ADAPTATION_OF_SIGNALING_PATHWAY                                        | 0.60 | 0.04 | 0 | 0 | 0 | not significant |
| 8561 | GO_PHOSPHATIDYLGLYCEROL_ACYL_CHAIN_REMODELING                             | 0.60 | 0.04 | 0 | 0 | 0 | not significant |
| 8562 | GO_PROTEIN_HETEROTRIMERIZATION                                            | 0.60 | 0.04 | 0 | 0 | 0 | not significant |
| 8563 | GO_REGULATION_OF_CHAPERONE_MEDIATED_AUTOPHAGY                             | 0.60 | 0.04 | 0 | 0 | 0 | not significant |
| 8564 | GO_REGULATION_OF_SEQUESTERING_OF_TRIGLYCERIDE                             | 0.60 | 0.04 | 0 | 0 | 0 | not significant |
| 8565 | REACTOME_ERYTHROPOIETIN_ACTIVATES_RAS                                     | 0.60 | 0.04 | 0 | 0 | 0 | not significant |
| 8566 | REACTOME_SIGNALING_BY_FGFR4_IN_DISEASE                                    | 0.60 | 0.04 | 0 | 0 | 0 | not significant |
| 8567 | DARWICHE_PAPILLOMA_RISK_HIGH_VS_LOW_UP                                    | 0.60 | 0.03 | 0 | 0 | 0 | not significant |
| 8568 | GO_BASEMENT_MEMBRANE_ASSEMBLY                                             | 0.60 | 0.03 | 0 | 0 | 0 | not significant |
| 8569 | GO_MRNA_3_SPLICE_SITE_RECOGNITION                                         | 0.60 | 0.03 | 0 | 0 | 0 | not significant |
| 8570 | CHR13Q32                                                                  | 0.60 | 0.02 | 0 | 0 | 0 | not significant |
| 8571 | GO_5_3_EXONUCLEASE_ACTIVITY                                               | 0.60 | 0.02 | 0 | 0 | 0 | not significant |
| 8572 | GO_CILIUM_OR_FLAGELLUM_DEPENDENT_CELL_MOTILITY                            | 0.60 | 0.02 | 0 | 0 | 0 | not significant |
| 8573 | GO_PEPTIDYL_ASPARAGINE_MODIFICATION                                       | 0.60 | 0.02 | 0 | 0 | 0 | not significant |
| 8574 | GO_POSITIVE_REGULATION_OF_BLOOD_VESSEL_DIAMETER                           | 0.60 | 0.02 | 0 | 0 | 0 | not significant |
| 8575 | GO_WNT_SIGNALING_PATHWAY_CALCIIUM_MODULATING_PATHWAY                      | 0.60 | 0.02 | 0 | 0 | 0 | not significant |
| 8576 | HOLLEMAN_ASPARAGINASE_RESISTANCE_ALL_DN                                   | 0.60 | 0.02 | 0 | 0 | 0 | not significant |
| 8577 | LIU_BREAST_CANCER                                                         | 0.60 | 0.02 | 0 | 0 | 0 | not significant |
| 8578 | GO_VESICLE_MEDIATED_TRANSPORT_BETWEEN_ENDOSOMAL_COMPARTMENTS              | 0.60 | 0.01 | 0 | 0 | 0 | not significant |
| 8579 | GINESTIER_BREAST_CANCER_20Q13_AMPLIFICATION_UP                            | 0.60 | 0.00 | 0 | 0 | 0 | not significant |
| 8580 | SIRNA EIF4GI_DN                                                           | 0.60 | 0.00 | 0 | 0 | 0 | not significant |
| 8581 | GO_RNA_POLYMERASE_II_C_TERMINAL_DOMAIN_BINDING                            | 0.61 | 0.06 | 0 | 0 | 0 | not significant |
| 8582 | GO_COENZYME_TRANSPORT                                                     | 0.61 | 0.04 | 0 | 0 | 0 | not significant |
| 8583 | GO_DORSAL_VENTRAL_AXIS_SPECIFICATION                                      | 0.61 | 0.04 | 0 | 0 | 0 | not significant |
| 8584 | GO_NEGATIVE_REGULATION_OF_VIRAL_INDUCED_CYTOPLASMIC_PATTERNS              | 0.61 | 0.04 | 0 | 0 | 0 | not significant |
| 8585 | GO_POSITIVE_REGULATION_OF_CYTOPLASMIC_TRANSLATION                         | 0.61 | 0.04 | 0 | 0 | 0 | not significant |
| 8586 | GO_REPLICATION_FORK_ARREST                                                | 0.61 | 0.04 | 0 | 0 | 0 | not significant |
| 8587 | GO_RNA_POLYMERASE_III_GENERAL_TRANSCRIPTION_INITIATION_FACTORS            | 0.61 | 0.04 | 0 | 0 | 0 | not significant |
| 8588 | GO_SYNAPTIC_VESICLE_PRIMING                                               | 0.61 | 0.04 | 0 | 0 | 0 | not significant |
| 8589 | GO_COPI_COATED_VESICLE_MEMBRANE                                           | 0.61 | 0.03 | 0 | 0 | 0 | not significant |
| 8590 | GO_NEGATIVE_REGULATION_OF_ANION_TRANSMEMBRANE_TRANSPORT                   | 0.61 | 0.03 | 0 | 0 | 0 | not significant |
| 8591 | GO_NEGATIVE_REGULATION_OF_HEART_CONTRACTION                               | 0.61 | 0.03 | 0 | 0 | 0 | not significant |
| 8592 | GO_POSITIVE_REGULATION_OF_VASCULAR_ASSOCIATED_SMOOTH_MUSCLE_CELL_MOTILITY | 0.61 | 0.03 | 0 | 0 | 0 | not significant |
| 8593 | GO_POSITIVE_REGULATION_OF_VASCULAR_ENDOTHELIAL_GROWTH_FACTOR_SIGNALING    | 0.61 | 0.03 | 0 | 0 | 0 | not significant |
| 8594 | GO_RESPONSE_TO_FOLIC_ACID                                                 | 0.61 | 0.03 | 0 | 0 | 0 | not significant |
| 8595 | GO_SWI_SNF_COMPLEX                                                        | 0.61 | 0.03 | 0 | 0 | 0 | not significant |
| 8596 | REACTOME_EPHRIN_SIGNALING                                                 | 0.61 | 0.03 | 0 | 0 | 0 | not significant |
| 8597 | SAGIV_CD24_TARGETS_UP                                                     | 0.61 | 0.03 | 0 | 0 | 0 | not significant |
| 8598 | BIOCARTA_IL6_PATHWAY                                                      | 0.61 | 0.02 | 0 | 0 | 0 | not significant |
| 8599 | CHR8Q12                                                                   | 0.61 | 0.02 | 0 | 0 | 0 | not significant |



|      |                                                            |      |      |   |   |   |                 |
|------|------------------------------------------------------------|------|------|---|---|---|-----------------|
| 8600 | GO_DNA_DOUBLE_STRAND_BREAK_PROCESSING                      | 0.61 | 0.02 | 0 | 0 | 0 | not significant |
| 8601 | KEGG_DORSO_VENTRAL_AXIS_FORMATION                          | 0.61 | 0.02 | 0 | 0 | 0 | not significant |
| 8602 | REACTOME_SIGNALING_BY_FGFR3_FUSIONS_IN_CANCER              | 0.61 | 0.02 | 0 | 0 | 0 | not significant |
| 8603 | GO_CORTICAL_CYTOSKELETON_ORGANIZATION                      | 0.61 | 0.01 | 0 | 0 | 0 | not significant |
| 8604 | GO_POSITIVE_REGULATION_OF_MACROAUTOPHAGY                   | 0.61 | 0.01 | 0 | 0 | 0 | not significant |
| 8605 | GO_PROTEIN_LOCALIZATION_TO_CILIUM                          | 0.61 | 0.01 | 0 | 0 | 0 | not significant |
| 8606 | GO_VIRION_ASSEMBLY                                         | 0.61 | 0.01 | 0 | 0 | 0 | not significant |
| 8607 | KEGG_BASE_EXCISION_REPAIR                                  | 0.61 | 0.01 | 0 | 0 | 0 | not significant |
| 8608 | PID_IFNG_PATHWAY                                           | 0.61 | 0.01 | 0 | 0 | 0 | not significant |
| 8609 | GO_AUTOPHAGOSOME_ORGANIZATION                              | 0.61 | 0.00 | 0 | 0 | 0 | not significant |
| 8610 | GO_GOLGI_ORGANIZATION                                      | 0.61 | 0.00 | 0 | 0 | 0 | not significant |
| 8611 | GO_TRANS_GOLGI_NETWORK                                     | 0.61 | 0.00 | 0 | 0 | 0 | not significant |
| 8612 | CLAUS_PGR_POSITIVE_MENINGIOMA_UP                           | 0.62 | 0.05 | 0 | 0 | 0 | not significant |
| 8613 | GO_REGULATION_OF_OSTEOCLAST_DEVELOPMENT                    | 0.62 | 0.05 | 0 | 0 | 0 | not significant |
| 8614 | GO_REGULATION_OF_SMAD_PROTEIN_COMPLEX_ASSEMBLY             | 0.62 | 0.05 | 0 | 0 | 0 | not significant |
| 8615 | REACTOME_SMAC_XIAP_REGULATED_APOPTOTIC_RESPONSE            | 0.62 | 0.05 | 0 | 0 | 0 | not significant |
| 8616 | GO_BBSOME                                                  | 0.62 | 0.04 | 0 | 0 | 0 | not significant |
| 8617 | GO_C4_DICARBOXYLATE_TRANSPORT                              | 0.62 | 0.04 | 0 | 0 | 0 | not significant |
| 8618 | GO_CD4_POSITIVE_ALPHA_BETA_T_CELL_PROLIFERATION            | 0.62 | 0.04 | 0 | 0 | 0 | not significant |
| 8619 | GO_LIPOPROTEIN_PARTICLE_RECEPTOR_ACTIVITY                  | 0.62 | 0.04 | 0 | 0 | 0 | not significant |
| 8620 | GO_MUSCLE_ALPHA_ACTININ_BINDING                            | 0.62 | 0.04 | 0 | 0 | 0 | not significant |
| 8621 | GO_REGULATION_OF_SKELETAL_MUSCLE_CELL_DIFFERENTIATION      | 0.62 | 0.04 | 0 | 0 | 0 | not significant |
| 8622 | GO_SYNAPTIC_VESICLE_DOCKING                                | 0.62 | 0.04 | 0 | 0 | 0 | not significant |
| 8623 | RAMJAUN_APOPTOSIS_BY_TGFB1_VIA_SMAD4_DN                    | 0.62 | 0.04 | 0 | 0 | 0 | not significant |
| 8624 | SYED ESTRADIOL_RESPONSE                                    | 0.62 | 0.04 | 0 | 0 | 0 | not significant |
| 8625 | CHEN_ETV5_TARGETS_TESTIS                                   | 0.62 | 0.03 | 0 | 0 | 0 | not significant |
| 8626 | GO_AMINO_SUGAR_BIOSYNTHETIC_PROCESS                        | 0.62 | 0.03 | 0 | 0 | 0 | not significant |
| 8627 | GO_DIVALENT_INORGANIC_CATION_TRANSMEMBRANE_TRANSPORTER_    | 0.62 | 0.03 | 0 | 0 | 0 | not significant |
| 8628 | GO_LYSOPHOSPHOLIPID_ACYLTRANSFERASE_ACTIVITY               | 0.62 | 0.03 | 0 | 0 | 0 | not significant |
| 8629 | GO_MLL3_4_COMPLEX                                          | 0.62 | 0.03 | 0 | 0 | 0 | not significant |
| 8630 | GO_POSITIVE_REGULATION_OF_LIPID_KINASE_ACTIVITY            | 0.62 | 0.03 | 0 | 0 | 0 | not significant |
| 8631 | GO_RESPONSE_TO_INTERFERON_ALPHA                            | 0.62 | 0.03 | 0 | 0 | 0 | not significant |
| 8632 | GO_SUMO_TRANSFERASE_ACTIVITY                               | 0.62 | 0.03 | 0 | 0 | 0 | not significant |
| 8633 | REACTOME_NUCLEOBASE_CATABOLISM                             | 0.62 | 0.03 | 0 | 0 | 0 | not significant |
| 8634 | BIOCARTA_ATM_PATHWAY                                       | 0.62 | 0.02 | 0 | 0 | 0 | not significant |
| 8635 | GAZIN_EPIGENETIC_SILENCING_BY_KRAS                         | 0.62 | 0.02 | 0 | 0 | 0 | not significant |
| 8636 | GO_DEVELOPMENTAL_PIGMENTATION                              | 0.62 | 0.02 | 0 | 0 | 0 | not significant |
| 8637 | GO_POSITIVE_REGULATION_OF_INTERLEUKIN_1_PRODUCTION         | 0.62 | 0.02 | 0 | 0 | 0 | not significant |
| 8638 | REACTOME_BUDDING_AND_MATURATION_OF_HIV_VIRION              | 0.62 | 0.02 | 0 | 0 | 0 | not significant |
| 8639 | REACTOME_SIGNALING_BY_FGFR3                                | 0.62 | 0.02 | 0 | 0 | 0 | not significant |
| 8640 | GO_PH_REDUCTION                                            | 0.62 | 0.01 | 0 | 0 | 0 | not significant |
| 8641 | GO_REGULATION_OF_PROTEIN_ACETYLTATION                      | 0.62 | 0.01 | 0 | 0 | 0 | not significant |
| 8642 | REACTOME_HDR_THROUGH_HOMOLOGOUS_RECOMBINATION_HRR          | 0.62 | 0.00 | 0 | 0 | 0 | not significant |
| 8643 | GO_DETECTION_OF_TEMPERATURE_STIMULUS                       | 0.63 | 0.05 | 0 | 0 | 0 | not significant |
| 8644 | GO_HYALURONAN_BIOSYNTHETIC_PROCESS                         | 0.63 | 0.05 | 0 | 0 | 0 | not significant |
| 8645 | GO_LRR_DOMAIN_BINDING                                      | 0.63 | 0.04 | 0 | 0 | 0 | not significant |
| 8646 | GO_POSITIVE_REGULATION_OF_CYCLASE_ACTIVITY                 | 0.63 | 0.04 | 0 | 0 | 0 | not significant |
| 8647 | GO_POSITIVE_REGULATION_OF_PROTEIN_POLYUBIQUITINATION       | 0.63 | 0.04 | 0 | 0 | 0 | not significant |
| 8648 | GO POSITIVE REGULATION OF TRANSLATION IN RESPONSE TO STRE  | 0.63 | 0.04 | 0 | 0 | 0 | not significant |
| 8649 | GO_PRE_MIRNA_PROCESSING                                    | 0.63 | 0.04 | 0 | 0 | 0 | not significant |
| 8650 | GO_REGULATION_OF_RESPONSE_TO_INTERFERON_GAMMA              | 0.63 | 0.04 | 0 | 0 | 0 | not significant |
| 8651 | GO_SENSORY_PERCEPTION_OF_TEMPERATURE_STIMULUS              | 0.63 | 0.04 | 0 | 0 | 0 | not significant |
| 8652 | GO_SIGNAL_PEPTIDE_PROCESSING                               | 0.63 | 0.04 | 0 | 0 | 0 | not significant |
| 8653 | KYNG_NORMAL_AGING_UP                                       | 0.63 | 0.04 | 0 | 0 | 0 | not significant |
| 8654 | BCAT_100_UP.V1_UP                                          | 0.63 | 0.03 | 0 | 0 | 0 | not significant |
| 8655 | CHIBA_RESPONSE_TO_TSA_DN                                   | 0.63 | 0.03 | 0 | 0 | 0 | not significant |
| 8656 | CHR9Q31                                                    | 0.63 | 0.03 | 0 | 0 | 0 | not significant |
| 8657 | GO_DNA_LIGATION                                            | 0.63 | 0.03 | 0 | 0 | 0 | not significant |
| 8658 | GO_MAGNESIUM_DEPENDENT_PROTEIN_SERINE_THREONINE_PHOSPHAT   | 0.63 | 0.03 | 0 | 0 | 0 | not significant |
| 8659 | GO_NUCLEOSIDE_SALVAGE                                      | 0.63 | 0.03 | 0 | 0 | 0 | not significant |
| 8660 | GO_PATHWAY_RESTRICTED_SMAD_PROTEIN_PHOSPHORYLTATION        | 0.63 | 0.03 | 0 | 0 | 0 | not significant |
| 8661 | GO_CUL3_RING_UBIQUITIN_LIGASE_COMPLEX                      | 0.63 | 0.02 | 0 | 0 | 0 | not significant |
| 8662 | GO_DNA_REPAIR_COMPLEX                                      | 0.63 | 0.02 | 0 | 0 | 0 | not significant |
| 8663 | GO_RNA_POLYMERASE_II_ACTIVATING_TRANSCRIPTION_FACTOR_BINDI | 0.63 | 0.02 | 0 | 0 | 0 | not significant |
| 8664 | REACTOME_RESOLUTION_OF_ABASIC_SITES_AP_SITES               | 0.63 | 0.02 | 0 | 0 | 0 | not significant |
| 8665 | GO_CILIARY_TIP                                             | 0.63 | 0.01 | 0 | 0 | 0 | not significant |
| 8666 | GO_DAMAGED_DNA_BINDING                                     | 0.63 | 0.01 | 0 | 0 | 0 | not significant |
| 8667 | GO_REGULATION_OF_PEPTIDYL_LYSINE_ACETYLTATION              | 0.63 | 0.01 | 0 | 0 | 0 | not significant |
| 8668 | CHR13Q14                                                   | 0.63 | 0.00 | 0 | 0 | 0 | not significant |
| 8669 | GO_REGULATION_OF_CHROMATIN_ORGANIZATION                    | 0.63 | 0.00 | 0 | 0 | 0 | not significant |
| 8670 | RAO_BOUND_BY_SALL4_ISOFORM_A                               | 0.63 | 0.00 | 0 | 0 | 0 | not significant |
| 8671 | GO_DETECTION_OF_TEMPERATURE_STIMULUS_INVOLVED_IN_SENSORY   | 0.64 | 0.06 | 0 | 0 | 0 | not significant |
| 8672 | GO DOUBLE STRAND BREAK REPAIR VIA SINGLE STRAND ANNEALINC  | 0.64 | 0.06 | 0 | 0 | 0 | not significant |
| 8673 | GO_FILTRATION_DIAPHRAGM                                    | 0.64 | 0.06 | 0 | 0 | 0 | not significant |
| 8674 | GO_LAGGING_STRAND_ELONGATION                               | 0.64 | 0.06 | 0 | 0 | 0 | not significant |
| 8675 | GO_MELANOSOME_MEMBRANE                                     | 0.64 | 0.06 | 0 | 0 | 0 | not significant |
| 8676 | BIOCARTA_CHREBP_PATHWAY                                    | 0.64 | 0.05 | 0 | 0 | 0 | not significant |
| 8677 | CLASPER_LYMPHATIC_VESSELS_DURING_METASTASIS_UP             | 0.64 | 0.05 | 0 | 0 | 0 | not significant |
| 8678 | GO_AXONAL_TRANSPORT_OF_MITOCHONDRION                       | 0.64 | 0.05 | 0 | 0 | 0 | not significant |
| 8679 | GO_CARDIOBLAST_DIFFERENTIATION                             | 0.64 | 0.05 | 0 | 0 | 0 | not significant |
| 8680 | GO_DENDRITE_TERMINUS                                       | 0.64 | 0.05 | 0 | 0 | 0 | not significant |
| 8681 | GO_GOLGI_MEDIAL_CISTERNA                                   | 0.64 | 0.05 | 0 | 0 | 0 | not significant |
| 8682 | GO_INTRACILIARY_RETROGRADE_TRANSPORT                       | 0.64 | 0.05 | 0 | 0 | 0 | not significant |
| 8683 | GO_MAP_KINASE_SCAFFOLD_ACTIVITY                            | 0.64 | 0.05 | 0 | 0 | 0 | not significant |
| 8684 | GO_SPHINGOMYELIN_CATABOLIC_PROCESS                         | 0.64 | 0.05 | 0 | 0 | 0 | not significant |
| 8685 | MATZUK_EARLY_ANTRAL_FOLLICLE                               | 0.64 | 0.05 | 0 | 0 | 0 | not significant |
| 8686 | NIKOLSKY_BREAST_CANCER_15Q26_AMPLICON                      | 0.64 | 0.05 | 0 | 0 | 0 | not significant |
| 8687 | REACTOME_IKBA_VARIANT_LEADS_TO_EDA_ID                      | 0.64 | 0.05 | 0 | 0 | 0 | not significant |
| 8688 | GO_CELL_CELL_ADHESION_MEDIATED_BY_INTEGRIN                 | 0.64 | 0.04 | 0 | 0 | 0 | not significant |
| 8689 | GO_OSTEOBLAST_DEVELOPMENT                                  | 0.64 | 0.04 | 0 | 0 | 0 | not significant |
| 8690 | GO_PORE_COMPLEX_ASSEMBLY                                   | 0.64 | 0.04 | 0 | 0 | 0 | not significant |
| 8691 | GO_REGULATION_OF_MICROTUBULE_MOTOR_ACTIVITY                | 0.64 | 0.04 | 0 | 0 | 0 | not significant |
| 8692 | REACTOME_SIGNALING_BY_HIPPO                                | 0.64 | 0.04 | 0 | 0 | 0 | not significant |
| 8693 | REACTOME_TRP_CHANNELS                                      | 0.64 | 0.04 | 0 | 0 | 0 | not significant |
| 8694 | BERNARD_PPAPDC1B_TARGETS_UP                                | 0.64 | 0.03 | 0 | 0 | 0 | not significant |
| 8695 | GO_CRANIOFACIAL_SUTURE_MORPHOGENESIS                       | 0.64 | 0.03 | 0 | 0 | 0 | not significant |
| 8696 | GO_NEGATIVE_REGULATION_OF_GENE_SILENCING                   | 0.64 | 0.03 | 0 | 0 | 0 | not significant |
| 8697 | GO POSITIVE REGULATION OF DNA TEMPLATED TRANSCRIPTION ELC  | 0.64 | 0.03 | 0 | 0 | 0 | not significant |
| 8698 | GO PROTEIN LOCALIZATION TO CHROMOSOME CENTROMERIC REGIC    | 0.64 | 0.03 | 0 | 0 | 0 | not significant |
| 8699 | GO_SNARE_COMPLEX_ASSEMBLY                                  | 0.64 | 0.03 | 0 | 0 | 0 | not significant |
| 8700 | REACTOME_INSERTION_OF_TAIL_ANCHORED_PROTEINS_INTO_THE_ENI  | 0.64 | 0.03 | 0 | 0 | 0 | not significant |
| 8701 | BCAT_BILD_ET_AL_DN                                         | 0.64 | 0.02 | 0 | 0 | 0 | not significant |
| 8702 | GAZDA_DIAMOND_BLACKFAN_ANEMIA_MYELOID_UP                   | 0.64 | 0.02 | 0 | 0 | 0 | not significant |
| 8703 | GO_CORE_PROMOTER_SEQUENCE_SPECIFIC_DNA_BINDING             | 0.64 | 0.02 | 0 | 0 | 0 | not significant |
| 8704 | GO_DNA_SECONDARY_STRUCTURE_BINDING                         | 0.64 | 0.02 | 0 | 0 | 0 | not significant |
| 8705 | WNT_SIGNALING                                              | 0.64 | 0.02 | 0 | 0 | 0 | not significant |
| 8706 | GO_NEGATIVE_REGULATION_OF_CHROMATIN_ORGANIZATION           | 0.64 | 0.01 | 0 | 0 | 0 | not significant |
| 8707 | GO_TUBE_CLOSURE                                            | 0.64 | 0.01 | 0 | 0 | 0 | not significant |
| 8708 | KEGG_NON_SMALL_CELL_LUNG_CANCER                            | 0.64 | 0.01 | 0 | 0 | 0 | not significant |

|      |                                                           |      |      |   |   |   |                 |
|------|-----------------------------------------------------------|------|------|---|---|---|-----------------|
| 8709 | GO_HISTONE_METHYLATION                                    | 0.64 | 0.00 | 0 | 0 | 0 | not significant |
| 8710 | GO_VACUOLE_ORGANIZATION                                   | 0.64 | 0.00 | 0 | 0 | 0 | not significant |
| 8711 | REACTOME_AUTOPHAGY                                        | 0.64 | 0.00 | 0 | 0 | 0 | not significant |
| 8712 | GO_APOPTOTIC_PROCESS_INVOLVED_IN_MORPHOGENESIS            | 0.65 | 0.06 | 0 | 0 | 0 | not significant |
| 8713 | GO_AUTOLYSOSOME                                           | 0.65 | 0.06 | 0 | 0 | 0 | not significant |
| 8714 | GO_NEGATIVE_REGULATION_OF_LONG_TERM_SYNAPTIC_POTENTIATIO  | 0.65 | 0.06 | 0 | 0 | 0 | not significant |
| 8715 | GO_POSTSYNAPTIC_MEMBRANE_ASSEMBLY                         | 0.65 | 0.06 | 0 | 0 | 0 | not significant |
| 8716 | REACTOME_ACTIVATED_NTRK2_SIGNALS_THROUGH_FRS2_AND_FRS3    | 0.65 | 0.06 | 0 | 0 | 0 | not significant |
| 8717 | REACTOME_ESTROGEN_DEPENDENT_NUCLEAR_EVENTS_DOWNSTREAM     | 0.65 | 0.06 | 0 | 0 | 0 | not significant |
| 8718 | BIOCARTA_ERAD_PATHWAY                                     | 0.65 | 0.05 | 0 | 0 | 0 | not significant |
| 8719 | DORN_ADENOVIRUS_INFECTION_32HR_UP                         | 0.65 | 0.05 | 0 | 0 | 0 | not significant |
| 8720 | FRASOR_TAMOXIFEN_RESPONSE_DN                              | 0.65 | 0.05 | 0 | 0 | 0 | not significant |
| 8721 | GO_HIGH_DENSITY_LIPOPROTEIN_PARTICLE_ASSEMBLY             | 0.65 | 0.05 | 0 | 0 | 0 | not significant |
| 8722 | GO_NEGATIVE_REGULATION_OF_AMYLOID_PRECURSOR_PROTEIN_BIO   | 0.65 | 0.05 | 0 | 0 | 0 | not significant |
| 8723 | GO_NEGATIVE_REGULATION_OF_PROTEIN_HOMOLOGOMERIZATION      | 0.65 | 0.05 | 0 | 0 | 0 | not significant |
| 8724 | GO_POSITIVE_REGULATION_OF_CELLULAR_RESPONSE_TO_DRUG       | 0.65 | 0.05 | 0 | 0 | 0 | not significant |
| 8725 | GO_POSITIVE_REGULATION_OF_FATTY_ACID_BETA_OXIDATION       | 0.65 | 0.05 | 0 | 0 | 0 | not significant |
| 8726 | GO_REGULATION_OF_PROTEIN_LOCALIZATION_TO_CHROMATIN        | 0.65 | 0.05 | 0 | 0 | 0 | not significant |
| 8727 | GO_REGULATION_OF_RESPIRATORY_BURST                        | 0.65 | 0.05 | 0 | 0 | 0 | not significant |
| 8728 | SAENZ_DETOX_PATHWAY_AND_CARCIINOGENESIS_DN                | 0.65 | 0.05 | 0 | 0 | 0 | not significant |
| 8729 | GO_CENTRIOLE_CENTRIOLE_COHESION                           | 0.65 | 0.04 | 0 | 0 | 0 | not significant |
| 8730 | GO_PHOSPHATIDIC_ACID_BINDING                              | 0.65 | 0.04 | 0 | 0 | 0 | not significant |
| 8731 | KEGG_BLADDER_CANCER                                       | 0.65 | 0.04 | 0 | 0 | 0 | not significant |
| 8732 | PID_WNT_CANONICAL_PATHWAY                                 | 0.65 | 0.04 | 0 | 0 | 0 | not significant |
| 8733 | CHR11P13                                                  | 0.65 | 0.03 | 0 | 0 | 0 | not significant |
| 8734 | DACOSTA_UV_RESPONSE_VIA_ERCC3_XPCS_UP                     | 0.65 | 0.03 | 0 | 0 | 0 | not significant |
| 8735 | GO_AUTOPHAGOSOME_MATURATION                               | 0.65 | 0.03 | 0 | 0 | 0 | not significant |
| 8736 | GO_ENDONUCLEASE_ACTIVITY_ACTIVE_WITH_EITHER_RIBO_OR_DEOXY | 0.65 | 0.03 | 0 | 0 | 0 | not significant |
| 8737 | GO_ENDOPLASMIC_RETICULUM_TO_CYTOSOL_TRANSPORT             | 0.65 | 0.03 | 0 | 0 | 0 | not significant |
| 8738 | GO_TRANSFERASE_ACTIVITY_TRANSFERRING_SULFUR_CONTAINING_GF | 0.65 | 0.03 | 0 | 0 | 0 | not significant |
| 8739 | HERNANDEZ_MITOTIC_ARREST_BY_DOCETAXEL_1_DN                | 0.65 | 0.03 | 0 | 0 | 0 | not significant |
| 8740 | KIM_TIAL1_TARGETS                                         | 0.65 | 0.03 | 0 | 0 | 0 | not significant |
| 8741 | XU_CREBBP_TARGETS_DN                                      | 0.65 | 0.03 | 0 | 0 | 0 | not significant |
| 8742 | GO_CELLULAR_RESPONSE_TO_NUTRIENT                          | 0.65 | 0.02 | 0 | 0 | 0 | not significant |
| 8743 | GO_NEGATIVE_REGULATION_OF_CELLULAR_RESPONSE_TO_TRANSFO    | 0.65 | 0.02 | 0 | 0 | 0 | not significant |
| 8744 | GO_REGULATION_OF_TRANSCRIPTION_REGULATORY_REGION_DNA_BI   | 0.65 | 0.02 | 0 | 0 | 0 | not significant |
| 8745 | GO_ROOF_OF_MOUTH_DEVELOPMENT                              | 0.65 | 0.02 | 0 | 0 | 0 | not significant |
| 8746 | REACTOME_HOMOLOGOUS_DNA_PAIRING_AND_STRAND_EXCHANGE       | 0.65 | 0.02 | 0 | 0 | 0 | not significant |
| 8747 | GO_ANDROGEN_RECEPTOR_BINDING                              | 0.65 | 0.01 | 0 | 0 | 0 | not significant |
| 8748 | GO_PHOSPHOPROTEIN_BINDING                                 | 0.65 | 0.01 | 0 | 0 | 0 | not significant |
| 8749 | TIEN_INTESTINE_PROBIOTICS_2HR_DN                          | 0.65 | 0.01 | 0 | 0 | 0 | not significant |
| 8750 | GO_CENTRIOLE_ELONGATION                                   | 0.66 | 0.07 | 0 | 0 | 0 | not significant |
| 8751 | GO_VASCULAR_ASSOCIATED_SMOOTH_MUSCLE_CELL_APOPTOTIC_PR    | 0.66 | 0.07 | 0 | 0 | 0 | not significant |
| 8752 | MYLLYKANGAS_AMPLIFICATION_HOT_SPOT_2                      | 0.66 | 0.07 | 0 | 0 | 0 | not significant |
| 8753 | BOYERINAS_ONCOFETAL_TARGETS_OF_LET7A1                     | 0.66 | 0.06 | 0 | 0 | 0 | not significant |
| 8754 | GO_COBALAMIN_BINDING                                      | 0.66 | 0.06 | 0 | 0 | 0 | not significant |
| 8755 | GO_G1_TO_G0_TRANSITION                                    | 0.66 | 0.06 | 0 | 0 | 0 | not significant |
| 8756 | GO_HEMIDESMOSOME_ASSEMBLY                                 | 0.66 | 0.06 | 0 | 0 | 0 | not significant |
| 8757 | GO_NEGATIVE_REGULATION_OF_CHEMOKINE_PRODUCTION            | 0.66 | 0.06 | 0 | 0 | 0 | not significant |
| 8758 | GO_NUCLEAR_TRANSCRIBED_MRNA_CATABOLIC_PROCESS_DEADENYL    | 0.66 | 0.06 | 0 | 0 | 0 | not significant |
| 8759 | GO_POSITIVE_REGULATION_OF_FATTY_ACID_METABOLIC_PROCESS    | 0.66 | 0.06 | 0 | 0 | 0 | not significant |
| 8760 | GO_REGULATION_OF_DEOXYRIBONUCLEASE_ACTIVITY               | 0.66 | 0.06 | 0 | 0 | 0 | not significant |
| 8761 | PLASARI_NFIC_TARGETS_BASAL_UP                             | 0.66 | 0.06 | 0 | 0 | 0 | not significant |
| 8762 | REACTOME_TYPE_I_HEMIDESMOSOME_ASSEMBLY                    | 0.66 | 0.06 | 0 | 0 | 0 | not significant |
| 8763 | GO_GLYCOSYLTRANSFERASE_ACTIVITY                           | 0.66 | 0.05 | 0 | 0 | 0 | not significant |
| 8764 | GO_RESPONSE_TO_HEPATOCYTE_GROWTH_FACTOR                   | 0.66 | 0.05 | 0 | 0 | 0 | not significant |
| 8765 | GO_EMBRYONIC_CRANIAL_SKELETON_MORPHOGENESIS               | 0.66 | 0.04 | 0 | 0 | 0 | not significant |
| 8766 | GO_INSULIN_RECEPTOR_BINDING                               | 0.66 | 0.04 | 0 | 0 | 0 | not significant |
| 8767 | GO_MICROTUBULE_ANCHORING                                  | 0.66 | 0.04 | 0 | 0 | 0 | not significant |
| 8768 | PID_PDGFRA_PATHWAY                                        | 0.66 | 0.04 | 0 | 0 | 0 | not significant |
| 8769 | SHIN_B_CELL_LYMPHOMA_CLUSTER_7                            | 0.66 | 0.04 | 0 | 0 | 0 | not significant |
| 8770 | GO_HISTONE_H3_K4_TRIMETHYLATION                           | 0.66 | 0.03 | 0 | 0 | 0 | not significant |
| 8771 | GO_PHOSPHOTYROSINE_RESIDUE_BINDING                        | 0.66 | 0.03 | 0 | 0 | 0 | not significant |
| 8772 | GO_CYTOPLASMIC_MICROTUBULE_ORGANIZATION                   | 0.66 | 0.02 | 0 | 0 | 0 | not significant |
| 8773 | GO_POSITIVE_REGULATION_OF_MRNA_CATABOLIC_PROCESS          | 0.66 | 0.02 | 0 | 0 | 0 | not significant |
| 8774 | GRADE_COLON_VS_RECTAL_CANCER_DN                           | 0.66 | 0.02 | 0 | 0 | 0 | not significant |
| 8775 | KEGG_N_GLYCAN_BIOSYNTHESIS                                | 0.66 | 0.02 | 0 | 0 | 0 | not significant |
| 8776 | KYNG_WERNER_SYNDROM_AND_NORMAL_AGING_UP                   | 0.66 | 0.02 | 0 | 0 | 0 | not significant |
| 8777 | PID_CD8_TCR_PATHWAY                                       | 0.66 | 0.02 | 0 | 0 | 0 | not significant |
| 8778 | RADMACHER_AML_PROGNOSIS                                   | 0.66 | 0.02 | 0 | 0 | 0 | not significant |
| 8779 | GO_CHROMATIN_ORGANIZATION_INVOLVED_IN_REGULATION_OF_TRAN  | 0.66 | 0.01 | 0 | 0 | 0 | not significant |
| 8780 | GO_ENERGY_RESERVE_METABOLIC_PROCESS                       | 0.66 | 0.01 | 0 | 0 | 0 | not significant |
| 8781 | GO_REGULATION_OF_DNA_REPLICATION                          | 0.66 | 0.01 | 0 | 0 | 0 | not significant |
| 8782 | GO_PROTEIN_ACETYLATION                                    | 0.66 | 0.00 | 0 | 0 | 0 | not significant |
| 8783 | GO_POSITIVE_REGULATION_OF_CELL_SIZE                       | 0.67 | 0.08 | 0 | 0 | 0 | not significant |
| 8784 | GO_DENDRITE_SELF_AVOIDANCE                                | 0.67 | 0.07 | 0 | 0 | 0 | not significant |
| 8785 | GO_MYELIN_SHEATH_ABAXONAL_REGION                          | 0.67 | 0.07 | 0 | 0 | 0 | not significant |
| 8786 | GO_NEGATIVE_REGULATION_OF_PROTEIN_AUTOPHOSPHORYLATION     | 0.67 | 0.07 | 0 | 0 | 0 | not significant |
| 8787 | GO_NUCLEOTIDE_TRANSMEMBRANE_TRANSPORT                     | 0.67 | 0.07 | 0 | 0 | 0 | not significant |
| 8788 | REACTOME_INLA_MEDIATED_ENTRY_OF_LISTERIA_MONOCYTOGENES_I  | 0.67 | 0.07 | 0 | 0 | 0 | not significant |
| 8789 | CHR5Q15                                                   | 0.67 | 0.06 | 0 | 0 | 0 | not significant |
| 8790 | GO_HISTONE_MRNA_CATABOLIC_PROCESS                         | 0.67 | 0.06 | 0 | 0 | 0 | not significant |
| 8791 | GO_NEUROTRANSMITTER_SODIUM_SYMPORTER_ACTIVITY             | 0.67 | 0.06 | 0 | 0 | 0 | not significant |
| 8792 | BIOCARTA_HDAC_PATHWAY                                     | 0.67 | 0.05 | 0 | 0 | 0 | not significant |
| 8793 | GO_DYNEIN_LIGHT_CHAIN_BINDING                             | 0.67 | 0.05 | 0 | 0 | 0 | not significant |
| 8794 | GO_INSULIN_LIKE_GROWTH_FACTOR_RECEPTOR_SIGNALING_PATHWAY  | 0.67 | 0.05 | 0 | 0 | 0 | not significant |
| 8795 | GO_NEGATIVE_REGULATION_OF_UBIQUITIN_PROTEIN_TRANSFERASE_A | 0.67 | 0.05 | 0 | 0 | 0 | not significant |
| 8796 | GO_POSITIVE_REGULATION_OF_ANTIEN_RECEPTOR_MEDIATED_SIGN   | 0.67 | 0.05 | 0 | 0 | 0 | not significant |
| 8797 | GO_REGULATION_OF_CYTOPLASMIC_TRANSPORT                    | 0.67 | 0.05 | 0 | 0 | 0 | not significant |
| 8798 | GO_REGULATION_OF_FIBROBLAST_MIGRATION                     | 0.67 | 0.05 | 0 | 0 | 0 | not significant |
| 8799 | PID_ALK1_PATHWAY                                          | 0.67 | 0.05 | 0 | 0 | 0 | not significant |
| 8800 | REACTOME_DOWNSTREAM_SIGNALING_OF_ACTIVATED_FGFR3          | 0.67 | 0.05 | 0 | 0 | 0 | not significant |
| 8801 | CHR8P12                                                   | 0.67 | 0.04 | 0 | 0 | 0 | not significant |
| 8802 | GO_AMINE_BIOSYNTHETIC_PROCESS                             | 0.67 | 0.04 | 0 | 0 | 0 | not significant |
| 8803 | GO_NEGATIVE_REGULATION_OF_GTPASE_ACTIVITY                 | 0.67 | 0.04 | 0 | 0 | 0 | not significant |
| 8804 | GO_NEGATIVE_REGULATION_OF_LIPID_BIOSYNTHETIC_PROCESS      | 0.67 | 0.04 | 0 | 0 | 0 | not significant |
| 8805 | GO_PRI_MRNA_TRANSCRIPTION_BY_RNA_POLYMERASE_II            | 0.67 | 0.04 | 0 | 0 | 0 | not significant |
| 8806 | GO_PEPTIDYL_LYSINE_TRIMETHYLATION                         | 0.67 | 0.03 | 0 | 0 | 0 | not significant |
| 8807 | REACTOME_REGULATION_OF_TP53_ACTIVITY_THROUGH_ACETYLATION  | 0.67 | 0.03 | 0 | 0 | 0 | not significant |
| 8808 | SMID_BREAST_CANCER_RELAPSE_IN_BRAIN_DN                    | 0.67 | 0.03 | 0 | 0 | 0 | not significant |
| 8809 | GO_CYTOPLASMIC_MICROTUBULE                                | 0.67 | 0.02 | 0 | 0 | 0 | not significant |
| 8810 | GO_HISTONE_H4_ACETYLATION                                 | 0.67 | 0.02 | 0 | 0 | 0 | not significant |
| 8811 | GO_LYTIC_VACUOLE_ORGANIZATION                             | 0.67 | 0.02 | 0 | 0 | 0 | not significant |
| 8812 | MCCLUNG_CREB1_TARGETS_DN                                  | 0.67 | 0.02 | 0 | 0 | 0 | not significant |
| 8813 | REACTOME_INTRINSIC_PATHWAY_FOR_APOPTOSIS                  | 0.67 | 0.02 | 0 | 0 | 0 | not significant |
| 8814 | FIGUEROA_AML_METHYLATION_CLUSTER_7_UP                     | 0.67 | 0.01 | 0 | 0 | 0 | not significant |
| 8815 | GO_NON_RECOMBINATIONAL_REPAIR                             | 0.67 | 0.01 | 0 | 0 | 0 | not significant |
| 8816 | GO_REGULATION_OF_NEUROTRANSMITTER_TRANSPORT               | 0.67 | 0.01 | 0 | 0 | 0 | not significant |
| 8817 | LIN_NPAS4_TARGETS_UP                                      | 0.67 | 0.01 | 0 | 0 | 0 | not significant |

|      |                                                          |      |      |   |   |   |                 |
|------|----------------------------------------------------------|------|------|---|---|---|-----------------|
| 8818 | REACTOME_P75_NTR_RECEPTOR_MEDIATED_SIGNALLING            | 0.67 | 0.01 | 0 | 0 | 0 | not significant |
| 8819 | GO_PEPIDYL_LYSINE_ACETYLTATION                           | 0.67 | 0.00 | 0 | 0 | 0 | not significant |
| 8820 | CHR8Q23                                                  | 0.68 | 0.08 | 0 | 0 | 0 | not significant |
| 8821 | GO_CALCIIUM_IION_IMPORT_INTO_CYTOSOL                     | 0.68 | 0.08 | 0 | 0 | 0 | not significant |
| 8822 | GO_CROSSOVER_JUNCTION_ENDODEOXYRIBONUCLEASE_ACTIVITY     | 0.68 | 0.08 | 0 | 0 | 0 | not significant |
| 8823 | GO_POSITIVE_REGULATION_OF_HETEROTYPIC_CELL_CELL_ADHESION | 0.68 | 0.08 | 0 | 0 | 0 | not significant |
| 8824 | GO_PRESYNAPTIC_CYTOSOL                                   | 0.68 | 0.08 | 0 | 0 | 0 | not significant |
| 8825 | GO_NEUTROPHIL_DIFFERENTIATION                            | 0.68 | 0.07 | 0 | 0 | 0 | not significant |
| 8826 | GO_POST_MRNA_RELEASE_SPLICEOSOMAL_COMPLEX                | 0.68 | 0.07 | 0 | 0 | 0 | not significant |
| 8827 | GO_RESPONSE_TO_DOPAMINE                                  | 0.68 | 0.07 | 0 | 0 | 0 | not significant |
| 8828 | GO_RIPOPTOSOME                                           | 0.68 | 0.07 | 0 | 0 | 0 | not significant |
| 8829 | MOOHTA_ROS                                               | 0.68 | 0.07 | 0 | 0 | 0 | not significant |
| 8830 | PID_FRA_PATHWAY                                          | 0.68 | 0.07 | 0 | 0 | 0 | not significant |
| 8831 | REACTOME_TRANSPORT_OF_NUCLEOTIDE_SUGARS                  | 0.68 | 0.07 | 0 | 0 | 0 | not significant |
| 8832 | REACTOME_TRIGLYCERIDE_BIOSYNTHESIS                       | 0.68 | 0.07 | 0 | 0 | 0 | not significant |
| 8833 | DORN_ADENOVIRUS_INFECTION_12HR_UP                        | 0.68 | 0.06 | 0 | 0 | 0 | not significant |
| 8834 | GO_CALCIIUM_DEPENDENT_CYSINE_TYPE_ENDOPEPTIDASE_ACTIVITY | 0.68 | 0.06 | 0 | 0 | 0 | not significant |
| 8835 | GO_COLLAGEN_CATABOLIC_PROCESS                            | 0.68 | 0.06 | 0 | 0 | 0 | not significant |
| 8836 | GO_DEADENYLATION_DEPENDENT_DECAPPING_OF_NUCLEAR_TRANSCF  | 0.68 | 0.06 | 0 | 0 | 0 | not significant |
| 8837 | GO_FORMATION_OF_TRANSLATION_PREINITIATION_COMPLEX        | 0.68 | 0.06 | 0 | 0 | 0 | not significant |
| 8838 | GO_MICROTUBULE_ANCHORING_AT_MICROTUBULE_ORGANIZING_CENTR | 0.68 | 0.06 | 0 | 0 | 0 | not significant |
| 8839 | GO_NEGATIVE_REGULATION_OF_MYOTUBE_DIFFERENTIATION        | 0.68 | 0.06 | 0 | 0 | 0 | not significant |
| 8840 | GO_POSITIVE_REGULATION_OF_GRANULOCYTE_CHEMOTAXIS         | 0.68 | 0.06 | 0 | 0 | 0 | not significant |
| 8841 | GO_POSITIVE_REGULATION_OF_NEUTROPHIL_MIGRATION           | 0.68 | 0.06 | 0 | 0 | 0 | not significant |
| 8842 | KAMIKUBO_MYELOID_MN1_NETWORK                             | 0.68 | 0.06 | 0 | 0 | 0 | not significant |
| 8843 | LI_CYTIDINE_ANALOG_PATHWAY                               | 0.68 | 0.06 | 0 | 0 | 0 | not significant |
| 8844 | BIOCARTA_ARF_PATHWAY                                     | 0.68 | 0.05 | 0 | 0 | 0 | not significant |
| 8845 | BIOCARTA_BARRESTIN_SRC_PATHWAY                           | 0.68 | 0.05 | 0 | 0 | 0 | not significant |
| 8846 | CHR7P14                                                  | 0.68 | 0.05 | 0 | 0 | 0 | not significant |
| 8847 | GO_MAST_CELL_MEDIATED_IMMUNITY                           | 0.68 | 0.04 | 0 | 0 | 0 | not significant |
| 8848 | GO_SH2_DOMAIN_BINDING                                    | 0.68 | 0.04 | 0 | 0 | 0 | not significant |
| 8849 | REACTOME_SIGNALING_BY_FGFR4                              | 0.68 | 0.04 | 0 | 0 | 0 | not significant |
| 8850 | SIG_PIP3_SIGNALING_IN_B_LYMPHOCYTES                      | 0.68 | 0.04 | 0 | 0 | 0 | not significant |
| 8851 | GO_MULTICELLULAR_ORGANISMAL_RESPONSE_TO_STRESS           | 0.68 | 0.03 | 0 | 0 | 0 | not significant |
| 8852 | REACTOME_INTRA_GOLGI_TRAFFIC                             | 0.68 | 0.03 | 0 | 0 | 0 | not significant |
| 8853 | GO_PML_BODY                                              | 0.68 | 0.02 | 0 | 0 | 0 | not significant |
| 8854 | GO_UBIQUITIN_DEPENDENT_ERAD_PATHWAY                      | 0.68 | 0.02 | 0 | 0 | 0 | not significant |
| 8855 | DARWICHE_PAPILLOMA_RISK_LOW_DN                           | 0.68 | 0.01 | 0 | 0 | 0 | not significant |
| 8856 | GAUSSMANN_MLL_AF4_FUSION_TARGETS_A_UP                    | 0.68 | 0.01 | 0 | 0 | 0 | not significant |
| 8857 | GO_CENTRIOLE                                             | 0.68 | 0.01 | 0 | 0 | 0 | not significant |
| 8858 | GO_PROTEIN_MONOUBIQUITINATION                            | 0.68 | 0.01 | 0 | 0 | 0 | not significant |
| 8859 | GO_STEROID_HORMONE_RECEPTOR_BINDING                      | 0.68 | 0.01 | 0 | 0 | 0 | not significant |
| 8860 | HOSHIDA_LIVER_CANCER_SUBCLASS_S2                         | 0.68 | 0.01 | 0 | 0 | 0 | not significant |
| 8861 | NIKOLSKY_BREAST_CANCER_20Q12_Q13_AMPICON                 | 0.68 | 0.01 | 0 | 0 | 0 | not significant |
| 8862 | GO_DOUBLE_STRAND_BREAK_REPAIR                            | 0.68 | 0.00 | 0 | 0 | 0 | not significant |
| 8863 | GO_MUTLALPHA_COMPLEX                                     | 0.69 | 0.09 | 0 | 0 | 0 | not significant |
| 8864 | GO_THIAMINE_PYROPHOSPHATE_BINDING                        | 0.69 | 0.09 | 0 | 0 | 0 | not significant |
| 8865 | GO_ENDOSOMAL_VESICLE_FUSION                              | 0.69 | 0.08 | 0 | 0 | 0 | not significant |
| 8866 | GO_GLYCOSYLKERAMIDE_CATABOLIC_PROCESS                    | 0.69 | 0.08 | 0 | 0 | 0 | not significant |
| 8867 | GO_HYPOTONIC_RESPONSE                                    | 0.69 | 0.08 | 0 | 0 | 0 | not significant |
| 8868 | GO_LYSINE_CATABOLIC_PROCESS                              | 0.69 | 0.08 | 0 | 0 | 0 | not significant |
| 8869 | GO_MITOTIC_SPINDLE_ASTRAL_MICROTUBULE                    | 0.69 | 0.08 | 0 | 0 | 0 | not significant |
| 8870 | GO_POSITIVE_REGULATION_OF_SYNAPTIC_VESICLE_TRANSPORT     | 0.69 | 0.08 | 0 | 0 | 0 | not significant |
| 8871 | GO_RADIAL_GLIAL_CELL_DIFFERENTIATION                     | 0.69 | 0.08 | 0 | 0 | 0 | not significant |
| 8872 | SABATES_COLORECTAL_ADENOMA_SIZE_DN                       | 0.69 | 0.08 | 0 | 0 | 0 | not significant |
| 8873 | BIOCARTA_TERC_PATHWAY                                    | 0.69 | 0.07 | 0 | 0 | 0 | not significant |
| 8874 | GO_GAMMA_SECRETASE_COMPLEX                               | 0.69 | 0.07 | 0 | 0 | 0 | not significant |
| 8875 | GO_HETEROCHROMATIN_ASSEMBLY                              | 0.69 | 0.07 | 0 | 0 | 0 | not significant |
| 8876 | GO_HYPEROSMOTIC_RESPONSE                                 | 0.69 | 0.07 | 0 | 0 | 0 | not significant |
| 8877 | GO_MICROTUBULE_ANCHORING_AT_CENTROSOME                   | 0.69 | 0.07 | 0 | 0 | 0 | not significant |
| 8878 | GO_MYOBLAST_FUSION                                       | 0.69 | 0.07 | 0 | 0 | 0 | not significant |
| 8879 | GO_NEGATIVE_REGULATION_OF_MORPHOGENESIS_OF_AN_EPITHELIUM | 0.69 | 0.07 | 0 | 0 | 0 | not significant |
| 8880 | GO_REGULATION_OF_AMYLOID_BETA_FORMATION                  | 0.69 | 0.07 | 0 | 0 | 0 | not significant |
| 8881 | GO_SYNAPTIC_MEMBRANE_ADHESION                            | 0.69 | 0.07 | 0 | 0 | 0 | not significant |
| 8882 | MEISSNER_BRAIN_HCP_WITH_H3_UNMETHYLATED                  | 0.69 | 0.07 | 0 | 0 | 0 | not significant |
| 8883 | GO_POSITIVE_REGULATION_OF_CHROMATIN_SILENCING            | 0.69 | 0.06 | 0 | 0 | 0 | not significant |
| 8884 | GO_REGULATION_OF_TELOMERE_CAPPING                        | 0.69 | 0.06 | 0 | 0 | 0 | not significant |
| 8885 | CHEOK_RESPONSE_TO_HD_MTX_DN                              | 0.69 | 0.05 | 0 | 0 | 0 | not significant |
| 8886 | GO_MAST_CELL_ACTIVATION                                  | 0.69 | 0.05 | 0 | 0 | 0 | not significant |
| 8887 | GRASEMANN_RETINOBLASTOMA_WITH_6P_AMPLIFICATION           | 0.69 | 0.05 | 0 | 0 | 0 | not significant |
| 8888 | KYNG_ENVIRONMENTAL_STRESS_RESPONSE_NOT_BY_GAMMA_IN_OLD   | 0.69 | 0.05 | 0 | 0 | 0 | not significant |
| 8889 | LUI_THYROID_CANCER_CLUSTER_2                             | 0.69 | 0.05 | 0 | 0 | 0 | not significant |
| 8890 | GO_ADENYLATE_CYCLASE_ACTIVATING_G_PROTEIN_COUPLED_RECEP  | 0.69 | 0.04 | 0 | 0 | 0 | not significant |
| 8891 | GO_DEMETHYLATION                                         | 0.69 | 0.04 | 0 | 0 | 0 | not significant |
| 8892 | KOHOUTEK_CCNT2_TARGETS                                   | 0.69 | 0.04 | 0 | 0 | 0 | not significant |
| 8893 | REACTOME_NOTCH_HLH_TRANSCRIPTION_PATHWAY                 | 0.69 | 0.04 | 0 | 0 | 0 | not significant |
| 8894 | CHEN_HOXA5_TARGETS_9HR_DN                                | 0.69 | 0.03 | 0 | 0 | 0 | not significant |
| 8895 | GO_DENDRITIC_SPINE_MORPHOGENESIS                         | 0.69 | 0.03 | 0 | 0 | 0 | not significant |
| 8896 | PID_TXA2PATHWAY                                          | 0.69 | 0.03 | 0 | 0 | 0 | not significant |
| 8897 | GO_BLASTOCYST_DEVELOPMENT                                | 0.69 | 0.02 | 0 | 0 | 0 | not significant |
| 8898 | GO_ENDOPLASMIC_RETICULUM_GOLGI_INTERMEDIATE_COMPARTMENT  | 0.69 | 0.01 | 0 | 0 | 0 | not significant |
| 8899 | GO_GUANYL_NUCLEOTIDE_EXCHANGE_FACTOR_ACTIVITY            | 0.69 | 0.01 | 0 | 0 | 0 | not significant |
| 8900 | GO_RAS_GUANYL_NUCLEOTIDE_EXCHANGE_FACTOR_ACTIVITY        | 0.69 | 0.01 | 0 | 0 | 0 | not significant |
| 8901 | CLIMENT_BREAST_CANCER_COPY_NUMBER_DN                     | 0.70 | 0.10 | 0 | 0 | 0 | not significant |
| 8902 | BIOCARTA_PLK3_PATHWAY                                    | 0.70 | 0.09 | 0 | 0 | 0 | not significant |
| 8903 | GO_CUL7_RING_UBIQUITIN_LIGASE_COMPLEX                    | 0.70 | 0.09 | 0 | 0 | 0 | not significant |
| 8904 | GO_DENDRITIC_GROWTH_CONE                                 | 0.70 | 0.09 | 0 | 0 | 0 | not significant |
| 8905 | GO_PROTEIN_GERANYLGERANYLTRANSFERASE_ACTIVITY            | 0.70 | 0.09 | 0 | 0 | 0 | not significant |
| 8906 | GO_REGULATION_OF_PLATELET_AGGREGATION                    | 0.70 | 0.09 | 0 | 0 | 0 | not significant |
| 8907 | REACTOME_LYSINE_CATABOLISM                               | 0.70 | 0.09 | 0 | 0 | 0 | not significant |
| 8908 | GO_METANEPHRIC_COLLECTING_DUCT_DEVELOPMENT               | 0.70 | 0.08 | 0 | 0 | 0 | not significant |
| 8909 | GO_NUCLEAR_ENVELOPE_LUMEN                                | 0.70 | 0.08 | 0 | 0 | 0 | not significant |
| 8910 | GO_PROTEIN_GLYCOSYLATION_IN_GOLGI                        | 0.70 | 0.08 | 0 | 0 | 0 | not significant |
| 8911 | GO_REGULATION_OF_MICROTUBULE_BINDING                     | 0.70 | 0.08 | 0 | 0 | 0 | not significant |
| 8912 | GO_RESPONSE_TO_VITAMIN_A                                 | 0.70 | 0.08 | 0 | 0 | 0 | not significant |
| 8913 | GO_RISC_LOADING_COMPLEX                                  | 0.70 | 0.08 | 0 | 0 | 0 | not significant |
| 8914 | GO_SERTOLI_CELL_DEVELOPMENT                              | 0.70 | 0.08 | 0 | 0 | 0 | not significant |
| 8915 | GO_SMALL_RNA_LOADING_ONTO_RISC                           | 0.70 | 0.08 | 0 | 0 | 0 | not significant |
| 8916 | CROONQUIST_STROMAL_STIMULATION_DN                        | 0.70 | 0.07 | 0 | 0 | 0 | not significant |
| 8917 | GO_COENZYME_TRANSMEMBRANE_TRANSPORTER_ACTIVITY           | 0.70 | 0.07 | 0 | 0 | 0 | not significant |
| 8918 | GO_EXTRINSIC_COMPONENT_OF_SYNAPTIC_MEMBRANE              | 0.70 | 0.07 | 0 | 0 | 0 | not significant |
| 8919 | GO_NEGATIVE_REGULATION_OF_ORGANIC_ACID_TRANSPORT         | 0.70 | 0.07 | 0 | 0 | 0 | not significant |
| 8920 | GO_NEGATIVE_T_CELL_SELECTION                             | 0.70 | 0.07 | 0 | 0 | 0 | not significant |
| 8921 | GO_UBIQUITIN_SPECIFIC_PROTEASE_BINDING                   | 0.70 | 0.07 | 0 | 0 | 0 | not significant |
| 8922 | REACTOME_FCGR_ACTIVATION                                 | 0.70 | 0.07 | 0 | 0 | 0 | not significant |
| 8923 | ABBUO_LIF_SIGNALING_1_DN                                 | 0.70 | 0.06 | 0 | 0 | 0 | not significant |
| 8924 | CHR3Q23                                                  | 0.70 | 0.06 | 0 | 0 | 0 | not significant |
| 8925 | CHR4P14                                                  | 0.70 | 0.06 | 0 | 0 | 0 | not significant |
| 8926 | GO_PHOSPHOLIPID_TRANSLOCATING_ATPASE_ACTIVITY            | 0.70 | 0.06 | 0 | 0 | 0 | not significant |

|      |                                                           |      |      |   |   |   |                 |
|------|-----------------------------------------------------------|------|------|---|---|---|-----------------|
| 8927 | GO_REGULATION_OF_MEMBRANE_LIPID_DISTRIBUTION              | 0.70 | 0.06 | 0 | 0 | 0 | not significant |
| 8928 | REACTOME_BETA_CATENIN_PHOSPHORYLATION_CASCADE             | 0.70 | 0.06 | 0 | 0 | 0 | not significant |
| 8929 | REACTOME_METAL_ION_SLC_TRANSPORTERS                       | 0.70 | 0.06 | 0 | 0 | 0 | not significant |
| 8930 | GO_MULTIVESICULAR_BODY_ORGANIZATION                       | 0.70 | 0.05 | 0 | 0 | 0 | not significant |
| 8931 | GO_NEGATIVE_REGULATION_OF_CHEMOTAXIS                      | 0.70 | 0.05 | 0 | 0 | 0 | not significant |
| 8932 | GO_RNA_DESTABILIZATION                                    | 0.70 | 0.05 | 0 | 0 | 0 | not significant |
| 8933 | GO_VENTRICULAR_SYSTEM_DEVELOPMENT                         | 0.70 | 0.05 | 0 | 0 | 0 | not significant |
| 8934 | MCDOWELL_ACUTE_LUNG_INJURY_UP                             | 0.70 | 0.05 | 0 | 0 | 0 | not significant |
| 8935 | REACTOME_DEADENYLATION_OF_MRNA                            | 0.70 | 0.05 | 0 | 0 | 0 | not significant |
| 8936 | REACTOME_SIGNALING_BY_NOTCH3                              | 0.70 | 0.05 | 0 | 0 | 0 | not significant |
| 8937 | WANG_TARGETS_OF_MLL_CBP_FUSION_UP                         | 0.70 | 0.05 | 0 | 0 | 0 | not significant |
| 8938 | ZHANG_INTERFERON_RESPONSE                                 | 0.70 | 0.05 | 0 | 0 | 0 | not significant |
| 8939 | GO_PROTEIN_SELF_ASSOCIATION                               | 0.70 | 0.04 | 0 | 0 | 0 | not significant |
| 8940 | PID_BARD1_PATHWAY                                         | 0.70 | 0.04 | 0 | 0 | 0 | not significant |
| 8941 | GO_REGULATION_OF_TUBE_SIZE                                | 0.70 | 0.03 | 0 | 0 | 0 | not significant |
| 8942 | GO_REGULATION_OF_CELL_PROJECTION_ASSEMBLY                 | 0.70 | 0.02 | 0 | 0 | 0 | not significant |
| 8943 | GO_SMOOTHENED_SIGNALING_PATHWAY                           | 0.70 | 0.02 | 0 | 0 | 0 | not significant |
| 8944 | GO_VESICLE_MEDIATED_TRANSPORT_TO_THE_PLASMA_MEMBRANE      | 0.70 | 0.02 | 0 | 0 | 0 | not significant |
| 8945 | CHANDRAN_METASTASIS_UP                                    | 0.70 | 0.00 | 0 | 0 | 0 | not significant |
| 8946 | GO_NEGATIVE_REGULATION_OF_MEIOTIC_NUCLEAR_DIVISION        | 0.71 | 0.10 | 0 | 0 | 0 | not significant |
| 8947 | REACTOME_ACTIVATION_OF_CASPASES_THROUGH_APOPTOSOME_MEI    | 0.71 | 0.10 | 0 | 0 | 0 | not significant |
| 8948 | BIOCARTA_IFNG_PATHWAY                                     | 0.71 | 0.09 | 0 | 0 | 0 | not significant |
| 8949 | GO_1_PHOSPHATIDYLINOSITOL_4_PHOSPHATE_5_KINASE_ACTIVITY   | 0.71 | 0.09 | 0 | 0 | 0 | not significant |
| 8950 | GO_NEGATIVE_REGULATION_OF_RIG_1_SIGNALING_PATHWAY         | 0.71 | 0.09 | 0 | 0 | 0 | not significant |
| 8951 | GO_NUCLEOBASE_METABOLIC_PROCESS                           | 0.71 | 0.09 | 0 | 0 | 0 | not significant |
| 8952 | GO_POSITIVE_REGULATION_OF_VASCULAR_ASSOCIATED_SMOOTH_MU   | 0.71 | 0.09 | 0 | 0 | 0 | not significant |
| 8953 | REACTOME_NAPLUS_CL_DEPENDENT_NEUROTRANSMITTER_TRANSPOR    | 0.71 | 0.09 | 0 | 0 | 0 | not significant |
| 8954 | BIOCARTA_TGFB_PATHWAY                                     | 0.71 | 0.08 | 0 | 0 | 0 | not significant |
| 8955 | GO_ACTININ_BINDING                                        | 0.71 | 0.08 | 0 | 0 | 0 | not significant |
| 8956 | GO_ENTEROENDOCRINE_CELL_DIFFERENTIATION                   | 0.71 | 0.08 | 0 | 0 | 0 | not significant |
| 8957 | GO_GLYCOSIDASE_ACTIVITY                                   | 0.71 | 0.08 | 0 | 0 | 0 | not significant |
| 8958 | GO_REGULATION_OF_ENDOEXOXYRIBONUCLEASE_ACTIVITY           | 0.71 | 0.08 | 0 | 0 | 0 | not significant |
| 8959 | GO_REGULATION_OF_PROTEIN_DEUBIQUITINATION                 | 0.71 | 0.08 | 0 | 0 | 0 | not significant |
| 8960 | GO_REGULATION_OF_SNARE_COMPLEX_ASSEMBLY                   | 0.71 | 0.08 | 0 | 0 | 0 | not significant |
| 8961 | GO_TYPE_I_TRANSFORMING_GROWTH_FACTOR_BETA_RECEPTOR_BIN    | 0.71 | 0.08 | 0 | 0 | 0 | not significant |
| 8962 | LEE_LIVER_CANCER_HEPATOBLAST                              | 0.71 | 0.08 | 0 | 0 | 0 | not significant |
| 8963 | REACTOME_BUTYROPHILIN_BTN_FAMILY_INTERACTIONS             | 0.71 | 0.08 | 0 | 0 | 0 | not significant |
| 8964 | REACTOME_DEFECTS_IN_COBALAMIN_B12_METABOLISM              | 0.71 | 0.08 | 0 | 0 | 0 | not significant |
| 8965 | REACTOME_ROLE_OF_LAT2_NTAL_LAB_ON_CALCIIUM_MOBILIZATION   | 0.71 | 0.08 | 0 | 0 | 0 | not significant |
| 8966 | SA_PROGRAMMED_CELL_DEATH                                  | 0.71 | 0.08 | 0 | 0 | 0 | not significant |
| 8967 | GO_ENDOPLASMIC_RETICULUM_QUALITY_CONTROL_COMPARTMENT      | 0.71 | 0.07 | 0 | 0 | 0 | not significant |
| 8968 | GO_MKS_COMPLEX                                            | 0.71 | 0.07 | 0 | 0 | 0 | not significant |
| 8969 | GO_RECEPTOR_INHIBITOR_ACTIVITY                            | 0.71 | 0.07 | 0 | 0 | 0 | not significant |
| 8970 | GO_REGULATION_OF_CARBOHYDRATE_METABOLIC_PROCESS_BY_REC    | 0.71 | 0.07 | 0 | 0 | 0 | not significant |
| 8971 | GO_RESPONSE_TO_ANTIMETABOLITE                             | 0.71 | 0.07 | 0 | 0 | 0 | not significant |
| 8972 | GO_SYNAPTIC_VESICLE_CYTOSKELETAL_TRANSPORT                | 0.71 | 0.07 | 0 | 0 | 0 | not significant |
| 8973 | GO_VIRAL_BUDDING                                          | 0.71 | 0.07 | 0 | 0 | 0 | not significant |
| 8974 | HASLINGER_B_CLL_WITH_6Q21_DELETION                        | 0.71 | 0.07 | 0 | 0 | 0 | not significant |
| 8975 | JIANG_HYPOXIA_VIA_VHL                                     | 0.71 | 0.07 | 0 | 0 | 0 | not significant |
| 8976 | MATZUK_EMBRYONIC_GERM_CELL                                | 0.71 | 0.07 | 0 | 0 | 0 | not significant |
| 8977 | REACTOME_DOWNSTREAM_SIGNALING_OF_ACTIVATED_FGFR4          | 0.71 | 0.07 | 0 | 0 | 0 | not significant |
| 8978 | REACTOME_MISCELLANEOUS_TRANSPORT_AND_BINDING_EVENTS       | 0.71 | 0.07 | 0 | 0 | 0 | not significant |
| 8979 | REACTOME_PHASE_0_RAPID_DEPOLARISATION                     | 0.71 | 0.07 | 0 | 0 | 0 | not significant |
| 8980 | REACTOME_TRANSCRIPTION_OF_E2F_TARGETS_UNDER_NEGATIVE_CO   | 0.71 | 0.07 | 0 | 0 | 0 | not significant |
| 8981 | SCHAEFFER_PROSTATE_DEVELOPMENT_AND_CANCER_BOX1_UP         | 0.71 | 0.07 | 0 | 0 | 0 | not significant |
| 8982 | BIOCARTA_ATRBRCA_PATHWAY                                  | 0.71 | 0.06 | 0 | 0 | 0 | not significant |
| 8983 | GO_CERAMIDE_METABOLIC_PROCESS                             | 0.71 | 0.06 | 0 | 0 | 0 | not significant |
| 8984 | GO_MICROTUBULE_NUCLEATION                                 | 0.71 | 0.06 | 0 | 0 | 0 | not significant |
| 8985 | GO_MYELOID_LEUKOCYTE_CYTOKINE_PRODUCTION                  | 0.71 | 0.06 | 0 | 0 | 0 | not significant |
| 8986 | GO_REGULATION_OF_EXIT_FROM_MITOSIS                        | 0.71 | 0.06 | 0 | 0 | 0 | not significant |
| 8987 | PETRETTO_HEART_MASS_QTL_CIS_UP                            | 0.71 | 0.06 | 0 | 0 | 0 | not significant |
| 8988 | REACTOME_NRAGE_SIGNALS_DEATH_THROUGH_JNK                  | 0.71 | 0.06 | 0 | 0 | 0 | not significant |
| 8989 | ZHAN_MULTIPLE_MYELOMA_CD1_DN                              | 0.71 | 0.06 | 0 | 0 | 0 | not significant |
| 8990 | GO_CAVEOLA                                                | 0.71 | 0.05 | 0 | 0 | 0 | not significant |
| 8991 | GO_ENDODERM_DEVELOPMENT                                   | 0.71 | 0.05 | 0 | 0 | 0 | not significant |
| 8992 | GO_NEGATIVE_REGULATION_OF_BLOOD_CIRCULATION               | 0.71 | 0.05 | 0 | 0 | 0 | not significant |
| 8993 | GO_REGULATION_OF_CELL_CYCLE_CHECKPOINT                    | 0.71 | 0.05 | 0 | 0 | 0 | not significant |
| 8994 | KEGG_MELANOMA                                             | 0.71 | 0.05 | 0 | 0 | 0 | not significant |
| 8995 | KYNG_RESPONSE_TO_H2O2_VIA_ERCC6_DN                        | 0.71 | 0.05 | 0 | 0 | 0 | not significant |
| 8996 | REACTOME_SIGNALING_BY_ERBB2                               | 0.71 | 0.05 | 0 | 0 | 0 | not significant |
| 8997 | GO_ATP_HYDROLYSIS_COUPLED_CATION_TRANSMEMBRANE_TRANSPOR   | 0.71 | 0.04 | 0 | 0 | 0 | not significant |
| 8998 | REACTOME_REPRODUCTION                                     | 0.71 | 0.03 | 0 | 0 | 0 | not significant |
| 8999 | GO_LATE_ENDOSOME_MEMBRANE                                 | 0.71 | 0.02 | 0 | 0 | 0 | not significant |
| 9000 | GO_NEGATIVE_REGULATION_OF_GENE_EXPRESSION_EPIGENETIC      | 0.71 | 0.02 | 0 | 0 | 0 | not significant |
| 9001 | IVANOVSKA_MIR106B_TARGETS                                 | 0.71 | 0.02 | 0 | 0 | 0 | not significant |
| 9002 | GO_NEGATIVE_REGULATION_OF_NUCLEOBASE_CONTAINING_COMPOUN   | 0.71 | 0.01 | 0 | 0 | 0 | not significant |
| 9003 | REACTOME_CELLULAR_SENESCENCE                              | 0.71 | 0.01 | 0 | 0 | 0 | not significant |
| 9004 | GO_CHROMATIN_ORGANIZATION                                 | 0.71 | 0.00 | 0 | 0 | 0 | not significant |
| 9005 | GO_MICROTUBULE_ORGANIZING_CENTER                          | 0.71 | 0.00 | 0 | 0 | 0 | not significant |
| 9006 | GO_PYRIMIDINE_DEOXYRIBONUCLEOTIDE_BIOSYNTHETIC_PROCESS    | 0.72 | 0.10 | 0 | 0 | 0 | not significant |
| 9007 | GO_Y_FORM_DNA_BINDING                                     | 0.72 | 0.10 | 0 | 0 | 0 | not significant |
| 9008 | VANDESLUIS_COMMD1_TARGETS_GROUP_4_DN                      | 0.72 | 0.10 | 0 | 0 | 0 | not significant |
| 9009 | GO_DYNACTIN_BINDING                                       | 0.72 | 0.09 | 0 | 0 | 0 | not significant |
| 9010 | GO_NEGATIVE_REGULATION_OF_CYTOKINE_PRODUCTION_INVOLVED_IN | 0.72 | 0.09 | 0 | 0 | 0 | not significant |
| 9011 | GO_PROTEIN_AUTOPROCESSING                                 | 0.72 | 0.09 | 0 | 0 | 0 | not significant |
| 9012 | GO_REGULATION_OF_METAPHASE_PLATE_CONGRESSION              | 0.72 | 0.09 | 0 | 0 | 0 | not significant |
| 9013 | GO_REGULATION_OF_VIRAL_INDUCED_CYTOPLASMIC_PATTERN_RECOC  | 0.72 | 0.09 | 0 | 0 | 0 | not significant |
| 9014 | GO_RNA_POLYMERASE_III_PREINITIATION_COMPLEX_ASSEMBLY      | 0.72 | 0.09 | 0 | 0 | 0 | not significant |
| 9015 | GO_SMAD_PROTEIN_COMPLEX_ASSEMBLY                          | 0.72 | 0.09 | 0 | 0 | 0 | not significant |
| 9016 | KONG_E2F1_TARGETS                                         | 0.72 | 0.09 | 0 | 0 | 0 | not significant |
| 9017 | MIKKELSEN_PLURIPOTENT_STATE_DN                            | 0.72 | 0.09 | 0 | 0 | 0 | not significant |
| 9018 | BIOCARTA_PITX2_PATHWAY                                    | 0.72 | 0.08 | 0 | 0 | 0 | not significant |
| 9019 | GO_ATPASE_DEPENDENT_TRANSMEMBRANE_TRANSPORT_COMPLEX       | 0.72 | 0.08 | 0 | 0 | 0 | not significant |
| 9020 | GO_LIVER_MORPHOGENESIS                                    | 0.72 | 0.08 | 0 | 0 | 0 | not significant |
| 9021 | GO_MICROVILLUS_MEMBRANE                                   | 0.72 | 0.08 | 0 | 0 | 0 | not significant |
| 9022 | GO_NEGATIVE_REGULATION_OF_ANION_TRANSPORT                 | 0.72 | 0.08 | 0 | 0 | 0 | not significant |
| 9023 | GO_REGULATION_OF_EPIDERMAL_GROWTH_FACTOR_ACTIVATED_REC    | 0.72 | 0.08 | 0 | 0 | 0 | not significant |
| 9024 | GO_REGULATION_OF_PROTEIN_LOCALIZATION_TO_CENTROSOME       | 0.72 | 0.08 | 0 | 0 | 0 | not significant |
| 9025 | GO_SEX_DETERMINATION                                      | 0.72 | 0.08 | 0 | 0 | 0 | not significant |
| 9026 | REACTOME_DOWNSTREAM_SIGNALING_OF_ACTIVATED_FGFR2          | 0.72 | 0.08 | 0 | 0 | 0 | not significant |
| 9027 | STARK_HYPPOCAMPUS_22Q11_DELETION_DN                       | 0.72 | 0.08 | 0 | 0 | 0 | not significant |
| 9028 | BIOCARTA_CHEMICAL_PATHWAY                                 | 0.72 | 0.07 | 0 | 0 | 0 | not significant |
| 9029 | BIOCARTA_NFKB_PATHWAY                                     | 0.72 | 0.07 | 0 | 0 | 0 | not significant |
| 9030 | CHR18Q12                                                  | 0.72 | 0.07 | 0 | 0 | 0 | not significant |
| 9031 | GO_ORGANIC_CATION_TRANSPORT                               | 0.72 | 0.07 | 0 | 0 | 0 | not significant |
| 9032 | GO_PYRIMIDINE_CONTAINING_COMPOUND_METABOLIC_PROCESS       | 0.72 | 0.07 | 0 | 0 | 0 | not significant |
| 9033 | GO_REGULATION_OF_FATTY_ACID_OXIDATION                     | 0.72 | 0.07 | 0 | 0 | 0 | not significant |
| 9034 | PID_A6B1_A6B4_INTEGRIN_PATHWAY                            | 0.72 | 0.07 | 0 | 0 | 0 | not significant |
| 9035 | REACTOME_TP53_REGULATES_TRANSCRIPTION_OF_ADDITIONAL_CELL  | 0.72 | 0.07 | 0 | 0 | 0 | not significant |

|      |                                                              |      |      |   |   |   |                 |
|------|--------------------------------------------------------------|------|------|---|---|---|-----------------|
| 9036 | CHRXQ22                                                      | 0.72 | 0.06 | 0 | 0 | 0 | not significant |
| 9037 | GO_S_ACYLTRANSFERASE_ACTIVITY                                | 0.72 | 0.06 | 0 | 0 | 0 | not significant |
| 9038 | REACTOME_IRAK1_RECRUITS_IKK_COMPLEX                          | 0.72 | 0.06 | 0 | 0 | 0 | not significant |
| 9039 | AMIT_EGF_RESPONSE_240_HELA                                   | 0.72 | 0.05 | 0 | 0 | 0 | not significant |
| 9040 | CHEN_NEUROBLASTOMA_COPY_NUMBER_GAINS                         | 0.72 | 0.05 | 0 | 0 | 0 | not significant |
| 9041 | GO_CENTRIOLE_ASSEMBLY                                        | 0.72 | 0.05 | 0 | 0 | 0 | not significant |
| 9042 | GO_ENDOPLASMIC_RETICULUM_GOLGI_INTERMEDIATE_COMPARTMENT      | 0.72 | 0.05 | 0 | 0 | 0 | not significant |
| 9043 | GO_NEUTROPHIL_MIGRATION                                      | 0.72 | 0.05 | 0 | 0 | 0 | not significant |
| 9044 | JAZAG_TGFB1_SIGNALING_VIA_SMAD4_DN                           | 0.72 | 0.05 | 0 | 0 | 0 | not significant |
| 9045 | PID_TRKR_PATHWAY                                             | 0.72 | 0.05 | 0 | 0 | 0 | not significant |
| 9046 | GO_ACTIVATING_TRANSCRIPTION_FACTOR_BINDING                   | 0.72 | 0.04 | 0 | 0 | 0 | not significant |
| 9047 | GO_REGULATION_OF_HISTONE_METHYLATION                         | 0.72 | 0.04 | 0 | 0 | 0 | not significant |
| 9048 | OUILLETTE_CLL_13Q14_DELETION_UP                              | 0.72 | 0.04 | 0 | 0 | 0 | not significant |
| 9049 | PID_P75_NTR_PATHWAY                                          | 0.72 | 0.04 | 0 | 0 | 0 | not significant |
| 9050 | GO_ALTERNATIVE_MRNA_SPLICING_VIA_SPLICEOSOME                 | 0.72 | 0.03 | 0 | 0 | 0 | not significant |
| 9051 | DARWICHE_SKIN_TUMOR_PROMOTER_DN                              | 0.72 | 0.02 | 0 | 0 | 0 | not significant |
| 9052 | GO_FC_RECEPTOR_MEDIATED_STIMULATORY_SIGNALING_PATHWAY        | 0.72 | 0.02 | 0 | 0 | 0 | not significant |
| 9053 | WEI_MIR34A_TARGETS                                           | 0.72 | 0.02 | 0 | 0 | 0 | not significant |
| 9054 | GABRIELY_MIR21_TARGETS                                       | 0.72 | 0.00 | 0 | 0 | 0 | not significant |
| 9055 | GO_PROCESS_UTILIZING_AUTOPHAGIC_MECHANISM                    | 0.72 | 0.00 | 0 | 0 | 0 | not significant |
| 9056 | REACTOME_IL_6_TYPE_CYTOKINE_RECEPTOR_LIGAND_INTERACTIONS     | 0.73 | 0.12 | 0 | 0 | 0 | not significant |
| 9057 | GO_NEGATIVE_REGULATION_OF_SMOOTH_MUSCLE_CELL_DIFFERENTIATION | 0.73 | 0.11 | 0 | 0 | 0 | not significant |
| 9058 | GO_RNA_POLYMERASE_III_TYPE_1_PROMOTER_DNA_BINDING            | 0.73 | 0.11 | 0 | 0 | 0 | not significant |
| 9059 | MYLLYKANGAS_AMPLIFICATION_HOT_SPOT_25                        | 0.73 | 0.11 | 0 | 0 | 0 | not significant |
| 9060 | CHR3P13                                                      | 0.73 | 0.10 | 0 | 0 | 0 | not significant |
| 9061 | GO_MAINTENANCE_OF_APICAL_BASAL_CELL_POLARITY                 | 0.73 | 0.10 | 0 | 0 | 0 | not significant |
| 9062 | GO_MUCUS_SECRETION                                           | 0.73 | 0.10 | 0 | 0 | 0 | not significant |
| 9063 | GO_NURF_COMPLEX                                              | 0.73 | 0.10 | 0 | 0 | 0 | not significant |
| 9064 | GO_REGULATION_OF_PROTEIN_LOCALIZATION_TO_ENDOSOME            | 0.73 | 0.10 | 0 | 0 | 0 | not significant |
| 9065 | GO_SIGNAL_COMPLEX_ASSEMBLY                                   | 0.73 | 0.10 | 0 | 0 | 0 | not significant |
| 9066 | HOWLIN_CITED1_TARGETS_2_UP                                   | 0.73 | 0.10 | 0 | 0 | 0 | not significant |
| 9067 | REACTOME_ACYL_CHAIN_REMODELLING_OF_PG                        | 0.73 | 0.10 | 0 | 0 | 0 | not significant |
| 9068 | GENTILE_UV_HIGH_DOSE_UP                                      | 0.73 | 0.09 | 0 | 0 | 0 | not significant |
| 9069 | GO_ATTACHMENT_OF_MITOTIC_SPINDLE_MICROTUBULES_TO_KINETOC     | 0.73 | 0.09 | 0 | 0 | 0 | not significant |
| 9070 | GO_KERATINOCYTE_PROLIFERATION                                | 0.73 | 0.09 | 0 | 0 | 0 | not significant |
| 9071 | GO_MITOCHONDRION_DISTRIBUTION                                | 0.73 | 0.09 | 0 | 0 | 0 | not significant |
| 9072 | GO_NEGATIVE_REGULATION_OF_BONE_MINERALIZATION                | 0.73 | 0.09 | 0 | 0 | 0 | not significant |
| 9073 | GO_OXIDOREDUCTASE_ACTIVITY_ACTING_ON_A_SULFUR_GROUP_OF_I     | 0.73 | 0.09 | 0 | 0 | 0 | not significant |
| 9074 | GO_OXOGUTARATE_DEHYDROGENASE_COMPLEX                         | 0.73 | 0.09 | 0 | 0 | 0 | not significant |
| 9075 | GO_PROTEIN_LOCALIZATION_TO_KINETOCHORE                       | 0.73 | 0.09 | 0 | 0 | 0 | not significant |
| 9076 | GO_UBIQUITIN_UBIQUITIN_LIGASE_ACTIVITY                       | 0.73 | 0.09 | 0 | 0 | 0 | not significant |
| 9077 | GROSS_HYPOXIA_VIA_HIF1A_ONLY                                 | 0.73 | 0.09 | 0 | 0 | 0 | not significant |
| 9078 | NIELSEN_SYNOVIAL_SARCOMA_UP                                  | 0.73 | 0.09 | 0 | 0 | 0 | not significant |
| 9079 | REACTOME_MYOCLONIC_EPILEPSY_OF_LAFORA                        | 0.73 | 0.09 | 0 | 0 | 0 | not significant |
| 9080 | TORCHIA_TARGETS_OF_EWSR1_FL11_FUSION_TOP20_DN                | 0.73 | 0.09 | 0 | 0 | 0 | not significant |
| 9081 | GO_G_PROTEIN_COUPLED_RECEPTOR_INTERNALIZATION                | 0.73 | 0.08 | 0 | 0 | 0 | not significant |
| 9082 | GO_MEMBRANE_PROTEIN_INTRACELLULAR_DOMAIN_PROTEOLYSIS         | 0.73 | 0.08 | 0 | 0 | 0 | not significant |
| 9083 | GO_NBAF_COMPLEX                                              | 0.73 | 0.08 | 0 | 0 | 0 | not significant |
| 9084 | GO_PRIMITIVE_HEMOPOIESIS                                     | 0.73 | 0.08 | 0 | 0 | 0 | not significant |
| 9085 | GO_REGULATION_OF_EXECUTION_PHASE_OF_APOPTOSIS                | 0.73 | 0.08 | 0 | 0 | 0 | not significant |
| 9086 | GO_REGULATION_OF_INTEGRIN_ACTIVATION                         | 0.73 | 0.08 | 0 | 0 | 0 | not significant |
| 9087 | SCHLINGEMANN_SKIN_CARCINOGENESIS_TPA_DN                      | 0.73 | 0.08 | 0 | 0 | 0 | not significant |
| 9088 | GO_HISTONE_H3_K9_METHYLATION                                 | 0.73 | 0.06 | 0 | 0 | 0 | not significant |
| 9089 | GO_INTERSTRAND_CROSS_LINK_REPAIR                             | 0.73 | 0.06 | 0 | 0 | 0 | not significant |
| 9090 | KEGG_NOD_LIKE_RECEPTOR_SIGNALING_PATHWAY                     | 0.73 | 0.06 | 0 | 0 | 0 | not significant |
| 9091 | GO_DNA_DEPENDENT_DNA_REPLICATION_MAINTENANCE_OF_FIDELITY     | 0.73 | 0.05 | 0 | 0 | 0 | not significant |
| 9092 | REACTOME_HDR_THROUGH_SINGLE_STRAND_ANNEALING_SSA             | 0.73 | 0.05 | 0 | 0 | 0 | not significant |
| 9093 | BROWNE_HCMV_INFECTION_8HR_UP                                 | 0.73 | 0.04 | 0 | 0 | 0 | not significant |
| 9094 | GO_MYOTUBE_DIFFERENTIATION                                   | 0.73 | 0.04 | 0 | 0 | 0 | not significant |
| 9095 | GO_REGULATION_OF_MEMBRANE_PERMEABILITY                       | 0.73 | 0.04 | 0 | 0 | 0 | not significant |
| 9096 | CHR1Q32                                                      | 0.73 | 0.03 | 0 | 0 | 0 | not significant |
| 9097 | GO_POSITIVE_REGULATION_OF_CHROMATIN_ORGANIZATION             | 0.73 | 0.03 | 0 | 0 | 0 | not significant |
| 9098 | DAZARD_RESPONSE_TO_UV_SCC_DN                                 | 0.73 | 0.02 | 0 | 0 | 0 | not significant |
| 9099 | GO_PRESYNAPSE                                                | 0.73 | 0.01 | 0 | 0 | 0 | not significant |
| 9100 | GO_COVALENT_CHROMATIN_MODIFICATION                           | 0.73 | 0.00 | 0 | 0 | 0 | not significant |
| 9101 | LASTOWSKA_NEUROBLASTOMA_COPY_NUMBER_DN                       | 0.73 | 0.00 | 0 | 0 | 0 | not significant |
| 9102 | MILI_PSEUDOPODIA_HAPTOTAXIS_DN                               | 0.73 | 0.00 | 0 | 0 | 0 | not significant |
| 9103 | GO_CDP_ALCOHOL_PHOSPHATIDYLTRANSFERASE_ACTIVITY              | 0.74 | 0.13 | 0 | 0 | 0 | not significant |
| 9104 | GO_CUL2_RING_UBIQUITIN_LIGASE_COMPLEX                        | 0.74 | 0.12 | 0 | 0 | 0 | not significant |
| 9105 | GO_INTERLEUKIN_4_MEDIATED_SIGNALING_PATHWAY                  | 0.74 | 0.11 | 0 | 0 | 0 | not significant |
| 9106 | GO_REGULATION_OF_DENDRITIC_CELL_DIFFERENTIATION              | 0.74 | 0.11 | 0 | 0 | 0 | not significant |
| 9107 | GO_T_CELL_TOLERANCE_INDUCTION                                | 0.74 | 0.11 | 0 | 0 | 0 | not significant |
| 9108 | CHANG_POUSF1_TARGETS_DN                                      | 0.74 | 0.10 | 0 | 0 | 0 | not significant |
| 9109 | GO_DNA_N_GLYCOSYLASE_ACTIVITY                                | 0.74 | 0.10 | 0 | 0 | 0 | not significant |
| 9110 | GO_LEPTIN_MEDIATED_SIGNALING_PATHWAY                         | 0.74 | 0.10 | 0 | 0 | 0 | not significant |
| 9111 | GO_MESENCHYMAL_TO_EPITHELIAL_TRANSITION_INVOLVED_IN_METANE   | 0.74 | 0.10 | 0 | 0 | 0 | not significant |
| 9112 | GO_NEGATIVE_REGULATION_OF_UBIQUITIN_PROTEIN_LIGASE_ACTIVITY  | 0.74 | 0.10 | 0 | 0 | 0 | not significant |
| 9113 | GO_PHOSPHATIDYLOSITOL_KINASE_ACTIVITY                        | 0.74 | 0.10 | 0 | 0 | 0 | not significant |
| 9114 | GO_POSITIVE_REGULATION_OF_RECEPTOR_INTERNALIZATION           | 0.74 | 0.10 | 0 | 0 | 0 | not significant |
| 9115 | PID_ALK2_PATHWAY                                             | 0.74 | 0.10 | 0 | 0 | 0 | not significant |
| 9116 | REACTOME_KSRP_KHSRP_BINDS_AND_DESTABILIZES_MRNA              | 0.74 | 0.10 | 0 | 0 | 0 | not significant |
| 9117 | REACTOME_NOTCH4_ACTIVATION_AND_TRANSMISSION_OF_SIGNAL_TO     | 0.74 | 0.10 | 0 | 0 | 0 | not significant |
| 9118 | REACTOME_RUNX3_REGULATES_WNT_SIGNALING                       | 0.74 | 0.10 | 0 | 0 | 0 | not significant |
| 9119 | REACTOME_SOS_MEDIATED_SIGNALING                              | 0.74 | 0.10 | 0 | 0 | 0 | not significant |
| 9120 | GO_DIOL_BIOSYNTHETIC_PROCESS                                 | 0.74 | 0.09 | 0 | 0 | 0 | not significant |
| 9121 | KYNG_ENVIRONMENTAL_STRESS_RESPONSE_NOT_BY_UV_IN_OLD          | 0.74 | 0.09 | 0 | 0 | 0 | not significant |
| 9122 | PIONTEK_PKD1_TARGETS_UP                                      | 0.74 | 0.09 | 0 | 0 | 0 | not significant |
| 9123 | REACTOME_FRS_MEDIATED_FGFR3_SIGNALING                        | 0.74 | 0.09 | 0 | 0 | 0 | not significant |
| 9124 | WEST_ADRENOCORITICAL_CARCINOMA_VS_ADENOMA_DN                 | 0.74 | 0.09 | 0 | 0 | 0 | not significant |
| 9125 | CHR3P24                                                      | 0.74 | 0.08 | 0 | 0 | 0 | not significant |
| 9126 | GO_AMYLOID_BETA_FORMATION                                    | 0.74 | 0.08 | 0 | 0 | 0 | not significant |
| 9127 | GO_PHENOL_CONTAINING_COMPOUND_METABOLIC_PROCESS              | 0.74 | 0.08 | 0 | 0 | 0 | not significant |
| 9128 | GO_REGULATION_OF_EXTRACELLULAR_MATRIX_ORGANIZATION           | 0.74 | 0.08 | 0 | 0 | 0 | not significant |
| 9129 | GO_REGULATION_OF_PROTEIN_EXIT_FROM_ENDOPLASMIC_RETICULUM     | 0.74 | 0.08 | 0 | 0 | 0 | not significant |
| 9130 | WONG_IFNA2_RESISTANCE_UP                                     | 0.74 | 0.08 | 0 | 0 | 0 | not significant |
| 9131 | XU_CREBBP_TARGETS_UP                                         | 0.74 | 0.08 | 0 | 0 | 0 | not significant |
| 9132 | GO_O_ACYLTRANSFERASE_ACTIVITY                                | 0.74 | 0.07 | 0 | 0 | 0 | not significant |
| 9133 | GO_PROTEIN_INSERTION_INTO_MITOCHONDRIAL_MEMBRANE_INVOLVED    | 0.74 | 0.07 | 0 | 0 | 0 | not significant |
| 9134 | HU_GENOTOXIN_ACTION_DIRECT_VS_INDIRECT_4HR                   | 0.74 | 0.07 | 0 | 0 | 0 | not significant |
| 9135 | MIZUSHIMA_AUTOPHAGOSOME_FORMATION                            | 0.74 | 0.07 | 0 | 0 | 0 | not significant |
| 9136 | REACTOME_NEGATIVE_REGULATION_OF_FGFR3_SIGNALING              | 0.74 | 0.07 | 0 | 0 | 0 | not significant |
| 9137 | SCHUETZ_BREAST_CANCER_DUCTAL_INVASIVE_DN                     | 0.74 | 0.07 | 0 | 0 | 0 | not significant |
| 9138 | SHPP_DL3CL_CURED_VS_FATAL_DN                                 | 0.74 | 0.07 | 0 | 0 | 0 | not significant |
| 9139 | GO_DNA_CATABOLIC_PROCESS                                     | 0.74 | 0.06 | 0 | 0 | 0 | not significant |
| 9140 | GO_HISTONE_UBIQUITINATION                                    | 0.74 | 0.06 | 0 | 0 | 0 | not significant |
| 9141 | GO_NEGATIVE_REGULATION_OF_MUSCLE_TISSUE_DEVELOPMENT          | 0.74 | 0.06 | 0 | 0 | 0 | not significant |
| 9142 | REACTOME_FANCONI_ANEMIA_PATHWAY                              | 0.74 | 0.06 | 0 | 0 | 0 | not significant |
| 9143 | GO_DNA_METHYLATION                                           | 0.74 | 0.05 | 0 | 0 | 0 | not significant |
| 9144 | REACTOME_CELL_DEATH_SIGNALING_VIA_NRAGE_NRF1_AND_NADE        | 0.74 | 0.05 | 0 | 0 | 0 | not significant |

|      |                                                            |      |      |   |   |   |                 |
|------|------------------------------------------------------------|------|------|---|---|---|-----------------|
| 9145 | ROPERO_HDAC2_TARGETS                                       | 0.74 | 0.05 | 0 | 0 | 0 | not significant |
| 9146 | GO_CARBOXYLIC_ESTER_HYDROLASE_ACTIVITY                     | 0.74 | 0.04 | 0 | 0 | 0 | not significant |
| 9147 | GO_MORPHOGENESIS_OF_EMBRYONIC_EPITHELIUM                   | 0.74 | 0.04 | 0 | 0 | 0 | not significant |
| 9148 | GO_SH3_DOMAIN_BINDING                                      | 0.74 | 0.04 | 0 | 0 | 0 | not significant |
| 9149 | JNK_DN.V1_UP                                               | 0.74 | 0.04 | 0 | 0 | 0 | not significant |
| 9150 | VERHAAK_GLIOMASTOMA_NEURAL                                 | 0.74 | 0.04 | 0 | 0 | 0 | not significant |
| 9151 | GO_NEGATIVE_REGULATION_OF_CELL_GROWTH                      | 0.74 | 0.03 | 0 | 0 | 0 | not significant |
| 9152 | THUM_SYSTOLIC_HEART_FAILURE_DN                             | 0.74 | 0.02 | 0 | 0 | 0 | not significant |
| 9153 | GO_UBIQUITIN_LIGASE_COMPLEX                                | 0.74 | 0.00 | 0 | 0 | 0 | not significant |
| 9154 | GO_MUCOPOLYSACCHARIDE_METABOLIC_PROCESS                    | 0.75 | 0.13 | 0 | 0 | 0 | not significant |
| 9155 | GO_MITOCHONDRIAL_ALPHA_KETOGLUTARATE_DEHYDROGENASE_COM     | 0.75 | 0.12 | 0 | 0 | 0 | not significant |
| 9156 | GO_MUSCLE_MYOSIN_COMPLEX                                   | 0.75 | 0.12 | 0 | 0 | 0 | not significant |
| 9157 | GO_NEGATIVE_REGULATION_OF_EXECUTION_PHASE_OF_APOPTOSIS     | 0.75 | 0.12 | 0 | 0 | 0 | not significant |
| 9158 | GO_PHOSPHATIDYLINOSITOL_TRANSPORTER_ACTIVITY               | 0.75 | 0.12 | 0 | 0 | 0 | not significant |
| 9159 | GO_ARF_GUANYL_NUCLEOTIDE_EXCHANGE_FACTOR_ACTIVITY          | 0.75 | 0.11 | 0 | 0 | 0 | not significant |
| 9160 | GO_GLYCEROPHOSPHOLIPID_CATABOLIC_PROCESS                   | 0.75 | 0.11 | 0 | 0 | 0 | not significant |
| 9161 | GO_IRON_ION_TRANSMEMBRANE_TRANSPORT                        | 0.75 | 0.11 | 0 | 0 | 0 | not significant |
| 9162 | GO_MDA_5_SIGNALING_PATHWAY                                 | 0.75 | 0.11 | 0 | 0 | 0 | not significant |
| 9163 | GO_POSITIVE_REGULATION_OF_STRIATED_MUSCLE_CELL_APOPTOTIC   | 0.75 | 0.11 | 0 | 0 | 0 | not significant |
| 9164 | GO_REGULATION_OF_CYTOPLASMIC_TRANSLATIONAL_INITIATION      | 0.75 | 0.11 | 0 | 0 | 0 | not significant |
| 9165 | GO_REGULATION_OF_DENDRITE_EXTENSION                        | 0.75 | 0.11 | 0 | 0 | 0 | not significant |
| 9166 | ABDELMOHSEN_ELA.VL4_TARGETS                                | 0.75 | 0.10 | 0 | 0 | 0 | not significant |
| 9167 | CHR6Q27                                                    | 0.75 | 0.10 | 0 | 0 | 0 | not significant |
| 9168 | GO_CELL_DIFFERENTIATION_INVOLVED_IN_METANEPHROS_DEVELOPME  | 0.75 | 0.10 | 0 | 0 | 0 | not significant |
| 9169 | GO_ENDODEOXYRIBONUCLEASE_ACTIVITY_PRODUCING_3_PHOSPHOMC    | 0.75 | 0.10 | 0 | 0 | 0 | not significant |
| 9170 | GO_FIBROBLAST_ACTIVATION                                   | 0.75 | 0.10 | 0 | 0 | 0 | not significant |
| 9171 | GO_NEURON_RECOGNITION                                      | 0.75 | 0.10 | 0 | 0 | 0 | not significant |
| 9172 | GO_POSITIVE_REGULATION_OF_MITOCHONDRIAL_FISSION            | 0.75 | 0.10 | 0 | 0 | 0 | not significant |
| 9173 | GO_POSITIVE_REGULATION_OF_MITOTIC_SISTER_CHROMATID_SEGREG  | 0.75 | 0.10 | 0 | 0 | 0 | not significant |
| 9174 | GO_POSITIVE_REGULATION_OF_T_CELL_RECEPTOR_SIGNALING_PATHW  | 0.75 | 0.10 | 0 | 0 | 0 | not significant |
| 9175 | GO_RAP_PROTEIN_SIGNAL_TRANSDUCTION                         | 0.75 | 0.10 | 0 | 0 | 0 | not significant |
| 9176 | GO_REGULATION_OF_FC_RECEPTOR_MEDIATED_STIMULATORY_SIGNA    | 0.75 | 0.10 | 0 | 0 | 0 | not significant |
| 9177 | GO_REGULATION_OF_TUBULIN_DEACETYLATION                     | 0.75 | 0.10 | 0 | 0 | 0 | not significant |
| 9178 | GO_RESPONSE_TO_SALT                                        | 0.75 | 0.10 | 0 | 0 | 0 | not significant |
| 9179 | GO_SODIUM_ION_BINDING                                      | 0.75 | 0.10 | 0 | 0 | 0 | not significant |
| 9180 | MIKKELSEN_IPS_LCP_WITH_H3K27ME3                            | 0.75 | 0.10 | 0 | 0 | 0 | not significant |
| 9181 | REACTOME_P38MAPK_EVENTS                                    | 0.75 | 0.10 | 0 | 0 | 0 | not significant |
| 9182 | GO_AMYLOID_BETA_CLEARANCE                                  | 0.75 | 0.09 | 0 | 0 | 0 | not significant |
| 9183 | GO_EATING_BEHAVIOR                                         | 0.75 | 0.09 | 0 | 0 | 0 | not significant |
| 9184 | GO_MULTIVESICULAR_BODY                                     | 0.75 | 0.09 | 0 | 0 | 0 | not significant |
| 9185 | LIU_SMARCA4_TARGETS                                        | 0.75 | 0.09 | 0 | 0 | 0 | not significant |
| 9186 | GO_DNA_POLYMERASE_ACTIVITY                                 | 0.75 | 0.08 | 0 | 0 | 0 | not significant |
| 9187 | GO_MYD88_INDEPENDENT_TOLL_LIKE_RECEPTOR_SIGNALING_PATHWA   | 0.75 | 0.08 | 0 | 0 | 0 | not significant |
| 9188 | GO_REGULATION_OF_MAST_CELL_ACTIVATION                      | 0.75 | 0.08 | 0 | 0 | 0 | not significant |
| 9189 | GO_VENTRICULAR_SEPTUM_MORPHOGENESIS                        | 0.75 | 0.08 | 0 | 0 | 0 | not significant |
| 9190 | SCHAEFFER_SOX9_TARGETS_IN_PROSTATE_DEVELOPMENT_DN          | 0.75 | 0.08 | 0 | 0 | 0 | not significant |
| 9191 | WAKABAYASHI_ADIPOGENESIS_PPARG_BOUND_36HR                  | 0.75 | 0.08 | 0 | 0 | 0 | not significant |
| 9192 | GO_NEGATIVE_REGULATION_OF_AXONOGENESIS                     | 0.75 | 0.07 | 0 | 0 | 0 | not significant |
| 9193 | GO_POSITIVE_REGULATION_OF_MUSCLE_CELL_DIFFERENTIATION      | 0.75 | 0.07 | 0 | 0 | 0 | not significant |
| 9194 | REACTOME_OVARIAN_TUMOR_DOMAIN_PROTEASES                    | 0.75 | 0.07 | 0 | 0 | 0 | not significant |
| 9195 | ROESSLER_LIVER_CANCER_METASTASIS_DN                        | 0.75 | 0.07 | 0 | 0 | 0 | not significant |
| 9196 | BROWNE_HCMV_INFECTION_10HR_UP                              | 0.75 | 0.05 | 0 | 0 | 0 | not significant |
| 9197 | CAMPS_COLON_CANCER_COPY_NUMBER_UP                          | 0.75 | 0.05 | 0 | 0 | 0 | not significant |
| 9198 | GO_FEMALE_GAMETE_GENERATION                                | 0.75 | 0.05 | 0 | 0 | 0 | not significant |
| 9199 | GO_NEGATIVE_REGULATION_OF_PROTEOLYSIS_INVOLVED_IN_CELLULA  | 0.75 | 0.05 | 0 | 0 | 0 | not significant |
| 9200 | GO_POSITIVE_REGULATION_OF_UBIQUITIN_DEPENDENT_PROTEIN_CATA | 0.75 | 0.05 | 0 | 0 | 0 | not significant |
| 9201 | GO_PROTEIN_LOCALIZATION_TO_CYTOSKELETON                    | 0.75 | 0.05 | 0 | 0 | 0 | not significant |
| 9202 | GO_REGULATION_OF_CALCIIUM_ION_DEPENDENT_EXOCYTOSIS         | 0.75 | 0.05 | 0 | 0 | 0 | not significant |
| 9203 | GO_CYSSTEINE_TYPE_ENDOPEPTIDASE_ACTIVITY                   | 0.75 | 0.04 | 0 | 0 | 0 | not significant |
| 9204 | GO_ERAD_PATHWAY                                            | 0.75 | 0.04 | 0 | 0 | 0 | not significant |
| 9205 | GO_NEGATIVE_REGULATION_OF_INFLAMMATORY_RESPONSE            | 0.75 | 0.04 | 0 | 0 | 0 | not significant |
| 9206 | GO_CELLULAR_RESPONSE_TO_TOPOLOGICALLY_INCORRECT_PROTEIN    | 0.75 | 0.03 | 0 | 0 | 0 | not significant |
| 9207 | CHR1P36                                                    | 0.75 | 0.01 | 0 | 0 | 0 | not significant |
| 9208 | GO_SMALL_GTPASE_BINDING                                    | 0.75 | 0.01 | 0 | 0 | 0 | not significant |
| 9209 | GO_BLOOD_VESSEL_REMODELING                                 | 0.76 | 0.13 | 0 | 0 | 0 | not significant |
| 9210 | GO_NEGATIVE_REGULATION_OF_ACTIN_NUCLEATION                 | 0.76 | 0.13 | 0 | 0 | 0 | not significant |
| 9211 | REACTOME_TRIF_MEDIATED_PROGRAMMED_CELL_DEATH               | 0.76 | 0.13 | 0 | 0 | 0 | not significant |
| 9212 | GO_NEGATIVE_REGULATION_OF_HOMOTYPIC_CELL_CELL_ADHESION     | 0.76 | 0.12 | 0 | 0 | 0 | not significant |
| 9213 | GO_PROTEIN_PRENLYTRANSFERASE_ACTIVITY                      | 0.76 | 0.12 | 0 | 0 | 0 | not significant |
| 9214 | GO_RNA_POLYMERASE_I_CORE_BINDING                           | 0.76 | 0.12 | 0 | 0 | 0 | not significant |
| 9215 | REACTOME_ACTIVATION_OF_RAC1                                | 0.76 | 0.12 | 0 | 0 | 0 | not significant |
| 9216 | BIOCARTA_EICOSANOID_PATHWAY                                | 0.76 | 0.11 | 0 | 0 | 0 | not significant |
| 9217 | GO_ANTIOTIC_BIOSYNTHETIC_PROCESS                           | 0.76 | 0.11 | 0 | 0 | 0 | not significant |
| 9218 | GO_BASAL_PLASMA_MEMBRANE                                   | 0.76 | 0.11 | 0 | 0 | 0 | not significant |
| 9219 | GO_COLLECTING_DUCT_DEVELOPMENT                             | 0.76 | 0.11 | 0 | 0 | 0 | not significant |
| 9220 | GO_DIACYLGLYCEROL_KINASE_ACTIVITY                          | 0.76 | 0.11 | 0 | 0 | 0 | not significant |
| 9221 | GO_EXCITATORY_EXTRACELLULAR_LIGAND_GATED_ION_CHANNEL_ACT   | 0.76 | 0.11 | 0 | 0 | 0 | not significant |
| 9222 | GO_KERATINOCYTE_DEVELOPMENT                                | 0.76 | 0.11 | 0 | 0 | 0 | not significant |
| 9223 | GO_POSITIVE_REGULATION_OF_FC_RECEPTOR_MEDIATED_STIMULATO   | 0.76 | 0.11 | 0 | 0 | 0 | not significant |
| 9224 | GO_POSTSYNAPTIC_NEUROTRANSMITTER_RECEPTOR_INTERNALIZATIO   | 0.76 | 0.11 | 0 | 0 | 0 | not significant |
| 9225 | GO_PROTEIN_IMPORT_INTO_PEROXISOME_MEMBRANE                 | 0.76 | 0.11 | 0 | 0 | 0 | not significant |
| 9226 | GO_REGULATION_OF_AXON_GUIDANCE                             | 0.76 | 0.11 | 0 | 0 | 0 | not significant |
| 9227 | GO_REGULATION_OF_EXOSOMAL_SECRETION                        | 0.76 | 0.11 | 0 | 0 | 0 | not significant |
| 9228 | GO_TRIGLYCERIDE_RICH_PLASMA_LIPOPROTEIN_PARTICLE           | 0.76 | 0.11 | 0 | 0 | 0 | not significant |
| 9229 | GO_UDP_GALACTOSYLTRANSFERASE_ACTIVITY                      | 0.76 | 0.11 | 0 | 0 | 0 | not significant |
| 9230 | LI_CISPLATIN_RESISTANCE_UP                                 | 0.76 | 0.11 | 0 | 0 | 0 | not significant |
| 9231 | REACTOME_ACTIVATION_OF_SMO                                 | 0.76 | 0.11 | 0 | 0 | 0 | not significant |
| 9232 | REACTOME_JNK_C_JUN_KINASES_PHOSPHORYLATION_AND_ACTIVATION  | 0.76 | 0.11 | 0 | 0 | 0 | not significant |
| 9233 | SMD_BREAST_CANCER_RELAPSE_IN_LUNG_DN                       | 0.76 | 0.11 | 0 | 0 | 0 | not significant |
| 9234 | BIOCARTA_41B_PATHWAY                                       | 0.76 | 0.10 | 0 | 0 | 0 | not significant |
| 9235 | BIOCARTA_RACCYCD_PATHWAY                                   | 0.76 | 0.10 | 0 | 0 | 0 | not significant |
| 9236 | BONOME_OVARIAN_CANCER_POOR_SURVIVAL_UP                     | 0.76 | 0.10 | 0 | 0 | 0 | not significant |
| 9237 | CHR21Q21                                                   | 0.76 | 0.10 | 0 | 0 | 0 | not significant |
| 9238 | CHR2Q23                                                    | 0.76 | 0.10 | 0 | 0 | 0 | not significant |
| 9239 | FIGUEROA_AML_METHYLATION_CLUSTER_3_DN                      | 0.76 | 0.10 | 0 | 0 | 0 | not significant |
| 9240 | GO_ACETYLGALACTOSAMINYLTRANSFERASE_ACTIVITY                | 0.76 | 0.10 | 0 | 0 | 0 | not significant |
| 9241 | GO_AORTA_DEVELOPMENT                                       | 0.76 | 0.10 | 0 | 0 | 0 | not significant |
| 9242 | GO_CATALYTIC_ACTIVITY_ACTING_ON_A_GLYCOPROTEIN             | 0.76 | 0.10 | 0 | 0 | 0 | not significant |
| 9243 | GO_MESENCHYMAL_TO_EPITHELIAL_TRANSITION                    | 0.76 | 0.10 | 0 | 0 | 0 | not significant |
| 9244 | GO_NEUROTRANSMITTER_RECEPTOR_INTERNALIZATION               | 0.76 | 0.10 | 0 | 0 | 0 | not significant |
| 9245 | GO_POSITIVE_THYMIC_T_CELL_SELECTION                        | 0.76 | 0.10 | 0 | 0 | 0 | not significant |
| 9246 | GO_REGULATION_OF_PLATELET_DERIVED_GROWTH_FACTOR_RECEPT     | 0.76 | 0.10 | 0 | 0 | 0 | not significant |
| 9247 | GO_TETRAPYRROLE_METABOLIC_PROCESS                          | 0.76 | 0.10 | 0 | 0 | 0 | not significant |
| 9248 | REACTOME_BUTYRATE_RESPONSE_FACTOR_1_BRF1_BINDS_AND_DES     | 0.76 | 0.10 | 0 | 0 | 0 | not significant |
| 9249 | CASORELLI_APL_SECONDARY_VS_DE_NOVO_UP                      | 0.76 | 0.09 | 0 | 0 | 0 | not significant |
| 9250 | CERIBELLI_GENES_INACTIVE_AND_BOUND_BY_NFY                  | 0.76 | 0.09 | 0 | 0 | 0 | not significant |
| 9251 | CHANDRANI_METASTASIS_TOP50_UP                              | 0.76 | 0.09 | 0 | 0 | 0 | not significant |
| 9252 | GO_AGGRESOME                                               | 0.76 | 0.09 | 0 | 0 | 0 | not significant |
| 9253 | GO_AXONAL_GROWTH_CONE                                      | 0.76 | 0.09 | 0 | 0 | 0 | not significant |

|      |                                                             |      |      |   |   |   |                 |
|------|-------------------------------------------------------------|------|------|---|---|---|-----------------|
| 9254 | GO_HEME_BIOSYNTHETIC_PROCESS                                | 0.76 | 0.09 | 0 | 0 | 0 | not significant |
| 9255 | GO_REGULATION_OF_TRANSCRIPTION_BY_RNA_POLYMERASE_III        | 0.76 | 0.09 | 0 | 0 | 0 | not significant |
| 9256 | REACTOME_INSULIN_PROCESSING                                 | 0.76 | 0.09 | 0 | 0 | 0 | not significant |
| 9257 | SHAFFER_IRF4_MULTIPLE_MYELOMA_PROGRAM                       | 0.76 | 0.09 | 0 | 0 | 0 | not significant |
| 9258 | WU_HBX_TARGETS_2_UP                                         | 0.76 | 0.09 | 0 | 0 | 0 | not significant |
| 9259 | GO_ENDOCYTIC_RECYCLING                                      | 0.76 | 0.08 | 0 | 0 | 0 | not significant |
| 9260 | GO_HISTONE_MONOUBIQUITINATION                               | 0.76 | 0.08 | 0 | 0 | 0 | not significant |
| 9261 | GO_NEGATIVE_REGULATION_OF_RESPONSE_TO_ENDOPLASMIC_RETIC     | 0.76 | 0.08 | 0 | 0 | 0 | not significant |
| 9262 | PID_P13K_PLK_TRK_PATHWAY                                    | 0.76 | 0.08 | 0 | 0 | 0 | not significant |
| 9263 | GO_NUCLEOSIDE_MONOPHOSPHATE_BIOSYNTHETIC_PROCESS            | 0.76 | 0.07 | 0 | 0 | 0 | not significant |
| 9264 | GO_OOGENESIS                                                | 0.76 | 0.07 | 0 | 0 | 0 | not significant |
| 9265 | JOHNSTONE_PARVB_TARGETS_1_DN                                | 0.76 | 0.07 | 0 | 0 | 0 | not significant |
| 9266 | LUI_TARGETS_OF_PAX8_PPARG_FUSION                            | 0.76 | 0.07 | 0 | 0 | 0 | not significant |
| 9267 | PID_AR_PATHWAY                                              | 0.76 | 0.07 | 0 | 0 | 0 | not significant |
| 9268 | ZHAN_MULTIPLE_MYELOMA_MF_DN                                 | 0.76 | 0.07 | 0 | 0 | 0 | not significant |
| 9269 | GO_CELL_RECOGNITION                                         | 0.76 | 0.06 | 0 | 0 | 0 | not significant |
| 9270 | GO_GLUCAN_METABOLIC_PROCESS                                 | 0.76 | 0.06 | 0 | 0 | 0 | not significant |
| 9271 | GO_REGULATION_OF_DENDRITIC_SPINE_DEVELOPMENT                | 0.76 | 0.06 | 0 | 0 | 0 | not significant |
| 9272 | KEGG_TGF_BETA_SIGNALING_PATHWAY                             | 0.76 | 0.06 | 0 | 0 | 0 | not significant |
| 9273 | KEGG_TOLL_LIKE_RECEPTOR_SIGNALING_PATHWAY                   | 0.76 | 0.06 | 0 | 0 | 0 | not significant |
| 9274 | PID_TCR_PATHWAY                                             | 0.76 | 0.06 | 0 | 0 | 0 | not significant |
| 9275 | PKCA_DN_V1_UP                                               | 0.76 | 0.06 | 0 | 0 | 0 | not significant |
| 9276 | REACTOME_G_ALPHA_12_13_SIGNALING_EVENTS                     | 0.76 | 0.06 | 0 | 0 | 0 | not significant |
| 9277 | GO_ORGANELLE_DISASSEMBLY                                    | 0.76 | 0.04 | 0 | 0 | 0 | not significant |
| 9278 | REACTOME_SIGNALING_BY_TGF_BETA_FAMILY_MEMBERS               | 0.76 | 0.04 | 0 | 0 | 0 | not significant |
| 9279 | DARWICHE_SQUAMOUS_CELL_CARCINOMA_DN                         | 0.76 | 0.03 | 0 | 0 | 0 | not significant |
| 9280 | GO_REGULATION_OF_INTRINSIC_APOPTOTIC_SIGNALING_PATHWAY      | 0.76 | 0.03 | 0 | 0 | 0 | not significant |
| 9281 | GO_RECYCLING_ENDOSOME                                       | 0.76 | 0.02 | 0 | 0 | 0 | not significant |
| 9282 | STARK_PREFRONTAL_CORTEX_22Q11_DELETION_UP                   | 0.76 | 0.02 | 0 | 0 | 0 | not significant |
| 9283 | WANG_CISPLATIN_RESPONSE_AND_XPC_DN                          | 0.76 | 0.02 | 0 | 0 | 0 | not significant |
| 9284 | GO_PEROXISOME_FISSION                                       | 0.77 | 0.14 | 0 | 0 | 0 | not significant |
| 9285 | GO_HEMATOPOIETIC_STEM_CELL_PROLIFERATION                    | 0.77 | 0.13 | 0 | 0 | 0 | not significant |
| 9286 | KYNG_ENVIRONMENTAL_STRESS_RESPONSE_NOT_BY_4NQO_IN_OLD       | 0.77 | 0.13 | 0 | 0 | 0 | not significant |
| 9287 | TONKS_TARGETS_OF_RUNX1_RUNX1T1_FUSION_ERYTHROCYTE_DN        | 0.77 | 0.13 | 0 | 0 | 0 | not significant |
| 9288 | BIOCARTA_PAR1_PATHWAY                                       | 0.77 | 0.12 | 0 | 0 | 0 | not significant |
| 9289 | GO_ACTIVATION_OF_PROTEIN_KINASE_B_ACTIVITY                  | 0.77 | 0.12 | 0 | 0 | 0 | not significant |
| 9290 | GO_DNA_BINDING_BENDING                                      | 0.77 | 0.12 | 0 | 0 | 0 | not significant |
| 9291 | GO_INOSITOL_TRISPHOSPHATE_PHOSPHATASE_ACTIVITY              | 0.77 | 0.12 | 0 | 0 | 0 | not significant |
| 9292 | GO_MODULATION_OF_EXCITATORY_POSTSYNAPTIC_POTENTIAL          | 0.77 | 0.12 | 0 | 0 | 0 | not significant |
| 9293 | GO_POSITIVE_REGULATION_OF_MICROTUBULE_BINDING               | 0.77 | 0.12 | 0 | 0 | 0 | not significant |
| 9294 | GO_POSITIVE_REGULATION_OF_OSTEOCLAST_DIFFERENTIATION        | 0.77 | 0.12 | 0 | 0 | 0 | not significant |
| 9295 | WILLIAMS_ESR2_TARGETS_DN                                    | 0.77 | 0.12 | 0 | 0 | 0 | not significant |
| 9296 | GHANDHI_DIRECT_IRRADIATION_DN                               | 0.77 | 0.11 | 0 | 0 | 0 | not significant |
| 9297 | GO_CYTOPLASMIC_MRNA_PROCESSING_BODY_ASSEMBLY                | 0.77 | 0.11 | 0 | 0 | 0 | not significant |
| 9298 | GO_MITOGEN_ACTIVATED_PROTEIN_KINASE_BINDING                 | 0.77 | 0.11 | 0 | 0 | 0 | not significant |
| 9299 | GO_REGULATION_OF_ACUTE_INFLAMMATORY_RESPONSE_TO_ANTIGEN     | 0.77 | 0.11 | 0 | 0 | 0 | not significant |
| 9300 | GO_REGULATION_OF_MITOCHONDRIAL_FISSION                      | 0.77 | 0.11 | 0 | 0 | 0 | not significant |
| 9301 | GO_RESPONSE_TO_FUNGICIDE                                    | 0.77 | 0.11 | 0 | 0 | 0 | not significant |
| 9302 | GO_RNAI_EFFECTOR_COMPLEX                                    | 0.77 | 0.11 | 0 | 0 | 0 | not significant |
| 9303 | KEGG_DRUG_METABOLISM_CYTOCHROME_P450                        | 0.77 | 0.11 | 0 | 0 | 0 | not significant |
| 9304 | OLSSON_E2F3_TARGETS_UP                                      | 0.77 | 0.11 | 0 | 0 | 0 | not significant |
| 9305 | REACTOME_DOWNREGULATION_OF_ERBB2_SIGNALING                  | 0.77 | 0.11 | 0 | 0 | 0 | not significant |
| 9306 | EBAUER_TARGETS_OF_PAX3_FOXO1_FUSION_DN                      | 0.77 | 0.10 | 0 | 0 | 0 | not significant |
| 9307 | GO_CENTRIOLAR_SUBDISTAL_APPENDAGE                           | 0.77 | 0.10 | 0 | 0 | 0 | not significant |
| 9308 | GO_CYTOPLASMIC_TRANSLATIONAL_INITIATION                     | 0.77 | 0.10 | 0 | 0 | 0 | not significant |
| 9309 | GO_MULTIVESICULAR_BODY_SORTING_PATHWAY                      | 0.77 | 0.10 | 0 | 0 | 0 | not significant |
| 9310 | GO_NEGATIVE_REGULATION_OF_MYELOID_LEUKOCYTE_DIFFERENTIATION | 0.77 | 0.10 | 0 | 0 | 0 | not significant |
| 9311 | GO_TOLL_LIKE_RECEPTOR_3_SIGNALING_PATHWAY                   | 0.77 | 0.10 | 0 | 0 | 0 | not significant |
| 9312 | REACTOME_CYTOCHROME_P450_ARRANGED_BY_SUBSTRATE_TYPE         | 0.77 | 0.10 | 0 | 0 | 0 | not significant |
| 9313 | BEGUM_TARGETS_OF_PAX3_FOXO1_FUSION_UP                       | 0.77 | 0.09 | 0 | 0 | 0 | not significant |
| 9314 | CHR8P11                                                     | 0.77 | 0.09 | 0 | 0 | 0 | not significant |
| 9315 | GO_FIBROBLAST_MIGRATION                                     | 0.77 | 0.09 | 0 | 0 | 0 | not significant |
| 9316 | GO_ION_ANTIPORTER_ACTIVITY                                  | 0.77 | 0.09 | 0 | 0 | 0 | not significant |
| 9317 | GO_NUCLEOSIDE_MONOPHOSPHATE_METABOLIC_PROCESS               | 0.77 | 0.09 | 0 | 0 | 0 | not significant |
| 9318 | GO_REGULATION_OF_ERAD_PATHWAY                               | 0.77 | 0.09 | 0 | 0 | 0 | not significant |
| 9319 | KEGG_NOTCH_SIGNALING_PATHWAY                                | 0.77 | 0.09 | 0 | 0 | 0 | not significant |
| 9320 | CHANDRAN_METASTASIS_TOP50_DN                                | 0.77 | 0.08 | 0 | 0 | 0 | not significant |
| 9321 | CHEBOTAEV_GR_TARGETS_UP                                     | 0.77 | 0.08 | 0 | 0 | 0 | not significant |
| 9322 | GO_ACTIVATION_OF_MAPKK_ACTIVITY                             | 0.77 | 0.08 | 0 | 0 | 0 | not significant |
| 9323 | GO_IRON_ION_TRANSPORT                                       | 0.77 | 0.08 | 0 | 0 | 0 | not significant |
| 9324 | GO_NEUROMUSCULAR_JUNCTION                                   | 0.77 | 0.08 | 0 | 0 | 0 | not significant |
| 9325 | GO_PROMOTER_SPECIFIC_CHROMATIN_BINDING                      | 0.77 | 0.08 | 0 | 0 | 0 | not significant |
| 9326 | LUI_THYROID_CANCER_PAX8_PPARG_DN                            | 0.77 | 0.08 | 0 | 0 | 0 | not significant |
| 9327 | PID_ERA_GENOMIC_PATHWAY                                     | 0.77 | 0.08 | 0 | 0 | 0 | not significant |
| 9328 | REACTOME_REGULATION_OF_TP53_EXPRESSION_AND_DEGRADATION      | 0.77 | 0.08 | 0 | 0 | 0 | not significant |
| 9329 | REACTOME_SIGNALING_BY_NOTCH1_IN_CANCER                      | 0.77 | 0.08 | 0 | 0 | 0 | not significant |
| 9330 | CHR1Q23                                                     | 0.77 | 0.07 | 0 | 0 | 0 | not significant |
| 9331 | GO_INTEGRIN_MEDIATED_SIGNALING_PATHWAY                      | 0.77 | 0.07 | 0 | 0 | 0 | not significant |
| 9332 | GO_NEGATIVE_REGULATION_OF_MYELOID_CELL_DIFFERENTIATION      | 0.77 | 0.07 | 0 | 0 | 0 | not significant |
| 9333 | KEGG_VIBRIO_CHOLERAE_INFECTION                              | 0.77 | 0.07 | 0 | 0 | 0 | not significant |
| 9334 | AMIT_EGF_RESPONSE_120_HELA                                  | 0.77 | 0.06 | 0 | 0 | 0 | not significant |
| 9335 | CROMER_METASTASIS_UP                                        | 0.77 | 0.06 | 0 | 0 | 0 | not significant |
| 9336 | ZHAN_MULTIPLE_MYELOMA_CD1_AND_CD2_UP                        | 0.77 | 0.06 | 0 | 0 | 0 | not significant |
| 9337 | GO_POSITIVE_REGULATION_OF_CELL_GROWTH                       | 0.77 | 0.05 | 0 | 0 | 0 | not significant |
| 9338 | REACTOME_DEATH_RECEPTOR_SIGNALING                           | 0.77 | 0.04 | 0 | 0 | 0 | not significant |
| 9339 | GO_CELL_CYCLE_CHECKPOINT                                    | 0.77 | 0.03 | 0 | 0 | 0 | not significant |
| 9340 | GO_CYSSTEINE_TYPE_PEPTIDASE_ACTIVITY                        | 0.77 | 0.03 | 0 | 0 | 0 | not significant |
| 9341 | GO_CILIUM                                                   | 0.77 | 0.01 | 0 | 0 | 0 | not significant |
| 9342 | GO_COMMISSURAL_NEURON_AXON_GUIDANCE                         | 0.78 | 0.14 | 0 | 0 | 0 | not significant |
| 9343 | GO_NEGATIVE_REGULATION_OF_SMOOTHENED_SIGNALING_PATHWAY      | 0.78 | 0.14 | 0 | 0 | 0 | not significant |
| 9344 | GO_PHOSPHATIDYLINOSITOL_3_KINASE_COMPLEX_CLASS_III          | 0.78 | 0.14 | 0 | 0 | 0 | not significant |
| 9345 | EHLERS_ANEUPLOIDY_DN                                        | 0.78 | 0.13 | 0 | 0 | 0 | not significant |
| 9346 | GO_NEGATIVE_REGULATION_OF_LIPID_TRANSPORT                   | 0.78 | 0.13 | 0 | 0 | 0 | not significant |
| 9347 | GO_PEPTIDYL_PROLINE_HYDROXYLATION                           | 0.78 | 0.13 | 0 | 0 | 0 | not significant |
| 9348 | GO_VIRAL_TRANSLATIONAL_TERMINATION_REINITIATION             | 0.78 | 0.13 | 0 | 0 | 0 | not significant |
| 9349 | REACTOME_SIGNALING_BY_NTRK2_TRKB                            | 0.78 | 0.13 | 0 | 0 | 0 | not significant |
| 9350 | GO_DENDRITE_MEMBRANE                                        | 0.78 | 0.12 | 0 | 0 | 0 | not significant |
| 9351 | GO_DIHYDROLIPOYL_DEHYDROGENASE_COMPLEX                      | 0.78 | 0.12 | 0 | 0 | 0 | not significant |
| 9352 | GO_INSULIN LIKE_GROWTH_FACTOR_BINDING                       | 0.78 | 0.12 | 0 | 0 | 0 | not significant |
| 9353 | GO_POSITIVE_REGULATION_OF_TORC1_SIGNALING                   | 0.78 | 0.12 | 0 | 0 | 0 | not significant |
| 9354 | GO_REGULATION_OF_INTRINSIC_APOPTOTIC_SIGNALING_PATHWAY_IN   | 0.78 | 0.12 | 0 | 0 | 0 | not significant |
| 9355 | GO_RETINAL_METABOLIC_PROCESS                                | 0.78 | 0.12 | 0 | 0 | 0 | not significant |
| 9356 | REACTOME_PLATELET_ADHESION_TO_EXPOSED_COLLAGEN              | 0.78 | 0.12 | 0 | 0 | 0 | not significant |
| 9357 | REACTOME_TP53_REGULATES_TRANSCRIPTION_OF_SEVERAL_ADDITIO    | 0.78 | 0.12 | 0 | 0 | 0 | not significant |
| 9358 | REACTOME_TRAF3_DEPENDENT_IRF_ACTIVATION_PATHWAY             | 0.78 | 0.12 | 0 | 0 | 0 | not significant |
| 9359 | SMID_BREAST_CANCER_RELAPSE_IN_BRAIN_UP                      | 0.78 | 0.12 | 0 | 0 | 0 | not significant |
| 9360 | SPIRA_SMOKERS_LUNG_CANCER_DN                                | 0.78 | 0.12 | 0 | 0 | 0 | not significant |
| 9361 | GO_HISTONE_H4_K16_ACETYLATION                               | 0.78 | 0.11 | 0 | 0 | 0 | not significant |
| 9362 | GO_NEGATIVE_REGULATION_OF_INSULIN_SECRETION_INVOLVED_IN_CE  | 0.78 | 0.11 | 0 | 0 | 0 | not significant |

|      |                                                           |      |      |   |   |   |                 |
|------|-----------------------------------------------------------|------|------|---|---|---|-----------------|
| 9363 | GO_PHOTORECEPTOR_CELL_DIFFERENTIATION                     | 0.78 | 0.11 | 0 | 0 | 0 | not significant |
| 9364 | GO_REGULATION_OF_CARDIAC_MUSCLE_TISSUE_DEVELOPMENT        | 0.78 | 0.11 | 0 | 0 | 0 | not significant |
| 9365 | PID_GLYCAN_1PATHWAY                                       | 0.78 | 0.11 | 0 | 0 | 0 | not significant |
| 9366 | BROWNE_HCMV_INFECTION_8HR_DN                              | 0.78 | 0.10 | 0 | 0 | 0 | not significant |
| 9367 | BURTON_ADIPOGENESIS_PEAK_AT_0HR                           | 0.78 | 0.10 | 0 | 0 | 0 | not significant |
| 9368 | GO_CELLULAR_CARBOHYDRATE_CATABOLIC_PROCESS                | 0.78 | 0.10 | 0 | 0 | 0 | not significant |
| 9369 | GO_DETECTION_OF_STIMULUS_INVOLVED_IN_SENSORIAL_PERCEPTION | 0.78 | 0.10 | 0 | 0 | 0 | not significant |
| 9370 | GO_HISTONE_ACETYLTRANSFERASE_BINDING                      | 0.78 | 0.10 | 0 | 0 | 0 | not significant |
| 9371 | GO_PALMITOYLTRANSFERASE_ACTIVITY                          | 0.78 | 0.10 | 0 | 0 | 0 | not significant |
| 9372 | GO_POSITIVE_REGULATION_OF_PROTEIN_IMPORT                  | 0.78 | 0.10 | 0 | 0 | 0 | not significant |
| 9373 | GO_PROTEIN_DEACETYLASE_ACTIVITY                           | 0.78 | 0.10 | 0 | 0 | 0 | not significant |
| 9374 | GO_REGULATION_OF_TOLL_LIKE_RECEPTOR_SIGNALING_PATHWAY     | 0.78 | 0.10 | 0 | 0 | 0 | not significant |
| 9375 | REACTOME_ENDOSOMAL_SORTING_COMPLEX_REQUIRED_FOR_TRANS     | 0.78 | 0.10 | 0 | 0 | 0 | not significant |
| 9376 | GO_RECEPTOR_CLUSTERING                                    | 0.78 | 0.09 | 0 | 0 | 0 | not significant |
| 9377 | GO_SCAFFOLD_PROTEIN_BINDING                               | 0.78 | 0.09 | 0 | 0 | 0 | not significant |
| 9378 | PID_NOTCH_PATHWAY                                         | 0.78 | 0.09 | 0 | 0 | 0 | not significant |
| 9379 | LEIN_CHOROID_PLEXUS_MARKERS                               | 0.78 | 0.08 | 0 | 0 | 0 | not significant |
| 9380 | POMEROY_MEDULLOBLASTOMA_PROGNOSIS_DN                      | 0.78 | 0.08 | 0 | 0 | 0 | not significant |
| 9381 | REACTOME_SYNTHESIS_OF_SUBSTRATES_IN_N_GLYCAN_BIOSYNTHE    | 0.78 | 0.08 | 0 | 0 | 0 | not significant |
| 9382 | DCA_UP.V1_UP                                              | 0.78 | 0.06 | 0 | 0 | 0 | not significant |
| 9383 | GO_HYDROLASE_ACTIVITY_ACTING_ON_CARBON_NITROGEN_BUT_NOT   | 0.78 | 0.06 | 0 | 0 | 0 | not significant |
| 9384 | GO_LIPID_TRANSPORTER_ACTIVITY                             | 0.78 | 0.06 | 0 | 0 | 0 | not significant |
| 9385 | FIGUEROA_AML_METHYLATION_CLUSTER_3_UP                     | 0.78 | 0.05 | 0 | 0 | 0 | not significant |
| 9386 | GO_PLATELET_ACTIVATION                                    | 0.78 | 0.05 | 0 | 0 | 0 | not significant |
| 9387 | REACTOME_OXIDATIVE_STRESS_INDUCED_SENESCENCE              | 0.78 | 0.05 | 0 | 0 | 0 | not significant |
| 9388 | BAKKER_FOXO3_TARGETS_DN                                   | 0.78 | 0.04 | 0 | 0 | 0 | not significant |
| 9389 | GO_PLASMA_MEMBRANE_BOUNDED_CELL_PROJECTION_CYTOPLASM      | 0.78 | 0.04 | 0 | 0 | 0 | not significant |
| 9390 | GO_REGULATION_OF_RNA_SPLICING                             | 0.78 | 0.04 | 0 | 0 | 0 | not significant |
| 9391 | GO_MICROTUBULE_BINDING                                    | 0.78 | 0.03 | 0 | 0 | 0 | not significant |
| 9392 | GO_MICROTUBULE_ORGANIZING_CENTER_PART                     | 0.78 | 0.03 | 0 | 0 | 0 | not significant |
| 9393 | GO_REGULATION_OF_MITOCHONDRION_ORGANIZATION               | 0.78 | 0.03 | 0 | 0 | 0 | not significant |
| 9394 | HALLMARK_HEME_METABOLISM                                  | 0.78 | 0.03 | 0 | 0 | 0 | not significant |
| 9395 | DURCHDEWALD_SKIN_CARCINOGENESIS_DN                        | 0.78 | 0.02 | 0 | 0 | 0 | not significant |
| 9396 | GO_INTRINSIC_COMPONENT_OF_ORGANELLE_MEMBRANE              | 0.78 | 0.02 | 0 | 0 | 0 | not significant |
| 9397 | GO_TRANSITION_METAL_ION_BINDING                           | 0.78 | 0.00 | 0 | 0 | 0 | not significant |
| 9398 | CHRXQ11                                                   | 0.79 | 0.15 | 0 | 0 | 0 | not significant |
| 9399 | GO_AP_1_ADAPTOR_COMPLEX_BINDING                           | 0.79 | 0.15 | 0 | 0 | 0 | not significant |
| 9400 | GO_NEGATIVE_REGULATION_OF_T_CELL_MEDIATED_CYTOTOXICITY    | 0.79 | 0.15 | 0 | 0 | 0 | not significant |
| 9401 | GO_NUCLEAR_PERICENTRIC_HETEROCHROMATIN                    | 0.79 | 0.15 | 0 | 0 | 0 | not significant |
| 9402 | REACTOME_PI3K_AKT_ACTIVATION                              | 0.79 | 0.15 | 0 | 0 | 0 | not significant |
| 9403 | BANDRES_RESPONSE_TO_CARMUSTIN_WITHOUT_MGMT_24HR_DN        | 0.79 | 0.14 | 0 | 0 | 0 | not significant |
| 9404 | GO_ENDOPLASMIC_RETICULUM_TUBULAR_NETWORK_ORGANIZATION     | 0.79 | 0.14 | 0 | 0 | 0 | not significant |
| 9405 | GO_EUKARYOTIC_TRANSLATION_INITIATION_FACTOR_4F_COMPLEX    | 0.79 | 0.14 | 0 | 0 | 0 | not significant |
| 9406 | GO_FATTY_ACID_ALPHA_OXIDATION                             | 0.79 | 0.14 | 0 | 0 | 0 | not significant |
| 9407 | GO_NEGATIVE_REGULATION_OF_BEHAVIOR                        | 0.79 | 0.14 | 0 | 0 | 0 | not significant |
| 9408 | GO_POSITIVE_REGULATION_OF_CHROMOSOME_SEPARATION           | 0.79 | 0.14 | 0 | 0 | 0 | not significant |
| 9409 | GO_REGULATION_OF_MESONEPHROS_DEVELOPMENT                  | 0.79 | 0.14 | 0 | 0 | 0 | not significant |
| 9410 | GO_REGULATION_OF_SYNAPTIC_VESICLE_FUSION_TO_PRESYNAPTIC_A | 0.79 | 0.14 | 0 | 0 | 0 | not significant |
| 9411 | HINATA_NFKB_IMMUNO_INF                                    | 0.79 | 0.14 | 0 | 0 | 0 | not significant |
| 9412 | ZHENG_FOXP3_TARGETS_IN_THYMUS_DN                          | 0.79 | 0.14 | 0 | 0 | 0 | not significant |
| 9413 | CHRXQ24                                                   | 0.79 | 0.13 | 0 | 0 | 0 | not significant |
| 9414 | GO_CELL_FATE_DETERMINATION                                | 0.79 | 0.13 | 0 | 0 | 0 | not significant |
| 9415 | GO_LEUKOCYTE_TETHERING_OR_ROLLING                         | 0.79 | 0.13 | 0 | 0 | 0 | not significant |
| 9416 | GO_LYMPH_NODE_DEVELOPMENT                                 | 0.79 | 0.13 | 0 | 0 | 0 | not significant |
| 9417 | GO_MANNOSYL_OLIGOSACCHARIDE_1_2_ALPHA_MANNOSIDASE_ACTIVI  | 0.79 | 0.13 | 0 | 0 | 0 | not significant |
| 9418 | GO_POSITIVE_REGULATION_OF_EMBRYONIC_DEVELOPMENT           | 0.79 | 0.13 | 0 | 0 | 0 | not significant |
| 9419 | GO_POSITIVE_REGULATION_OF_ISOTYPE_SWITCHING               | 0.79 | 0.13 | 0 | 0 | 0 | not significant |
| 9420 | GO_PROTEIN_MATURATION_BY_IRON_SULFUR_CLUSTER_TRANSFER     | 0.79 | 0.13 | 0 | 0 | 0 | not significant |
| 9421 | GO_REGULATION_OF_KERATINOCYTE_PROLIFERATION               | 0.79 | 0.13 | 0 | 0 | 0 | not significant |
| 9422 | MANTOVANI_NFKB_TARGETS_UP                                 | 0.79 | 0.13 | 0 | 0 | 0 | not significant |
| 9423 | REACTOME_CD28_DEPENDENT_VAV1_PATHWAY                      | 0.79 | 0.13 | 0 | 0 | 0 | not significant |
| 9424 | REACTOME_MAP3K3_TPL2_DEPENDENT_MAPK1_3_ACTIVATION         | 0.79 | 0.13 | 0 | 0 | 0 | not significant |
| 9425 | GO_DOSAGE_COMPENSATION                                    | 0.79 | 0.12 | 0 | 0 | 0 | not significant |
| 9426 | GO_HYDROLASE_ACTIVITY_HYDROLYZING_N_GLYCOSYL_COMPOUNDS    | 0.79 | 0.12 | 0 | 0 | 0 | not significant |
| 9427 | GO_MAGNESIUM_ION_TRANSPORT                                | 0.79 | 0.12 | 0 | 0 | 0 | not significant |
| 9428 | GO_NEGATIVE_REGULATION_OF_OSTEOLAST_DIFFERENTIATION       | 0.79 | 0.12 | 0 | 0 | 0 | not significant |
| 9429 | GO_POSTSYNAPTIC_MEMBRANE_ORGANIZATION                     | 0.79 | 0.12 | 0 | 0 | 0 | not significant |
| 9430 | GO_REPRODUCTIVE_BEHAVIOR                                  | 0.79 | 0.12 | 0 | 0 | 0 | not significant |
| 9431 | GO_STRESS_GANGLION_ASSEMBLY                               | 0.79 | 0.12 | 0 | 0 | 0 | not significant |
| 9432 | LEE_AGING_MUSCLE_UP                                       | 0.79 | 0.12 | 0 | 0 | 0 | not significant |
| 9433 | REACTOME_E2F_MEDIATED_REGULATION_OF_DNA_REPLICATION       | 0.79 | 0.12 | 0 | 0 | 0 | not significant |
| 9434 | REACTOME_MAPK1_ERK2_ACTIVATION                            | 0.79 | 0.12 | 0 | 0 | 0 | not significant |
| 9435 | REACTOME_SIGNALING_BY_NOTCH2                              | 0.79 | 0.12 | 0 | 0 | 0 | not significant |
| 9436 | VALK_AML_CLUSTER_7                                        | 0.79 | 0.12 | 0 | 0 | 0 | not significant |
| 9437 | GO_PLATELET_DERIVED_GROWTH_FACTOR_RECEPTOR_SIGNALING_P/   | 0.79 | 0.11 | 0 | 0 | 0 | not significant |
| 9438 | REACTOME_SIGNALING_BY_FGFR1                               | 0.79 | 0.11 | 0 | 0 | 0 | not significant |
| 9439 | DELASERNA_MYOD_TARGETS_DN                                 | 0.79 | 0.10 | 0 | 0 | 0 | not significant |
| 9440 | FIGUEROA_AML_METHYLATION_CLUSTER_1_DN                     | 0.79 | 0.10 | 0 | 0 | 0 | not significant |
| 9441 | GO_CERAMIDE_BIOSYNTHETIC_PROCESS                          | 0.79 | 0.10 | 0 | 0 | 0 | not significant |
| 9442 | GO_EMBRYONIC_PLACENTA_DEVELOPMENT                         | 0.79 | 0.10 | 0 | 0 | 0 | not significant |
| 9443 | GO_REGULATION_OF_SYSTEMIC_ARTERIAL_BLOOD_PRESSURE         | 0.79 | 0.10 | 0 | 0 | 0 | not significant |
| 9444 | NIKOLSKY_BREAST_CANCER_8P12_P11_AMPLICON                  | 0.79 | 0.10 | 0 | 0 | 0 | not significant |
| 9445 | STAMBOLSKY_TARGETS_OF_MUTATED_TP53_DN                     | 0.79 | 0.10 | 0 | 0 | 0 | not significant |
| 9446 | CHRXQ26                                                   | 0.79 | 0.09 | 0 | 0 | 0 | not significant |
| 9447 | GO_NEGATIVE_REGULATION_OF_SMALL_GTPASE_MEDIATED_SIGNAL_T  | 0.79 | 0.09 | 0 | 0 | 0 | not significant |
| 9448 | KEGG_LONG_TERM_DEPRESSION                                 | 0.79 | 0.09 | 0 | 0 | 0 | not significant |
| 9449 | LIN_MELANOMA_COPY_NUMBER_UP                               | 0.79 | 0.09 | 0 | 0 | 0 | not significant |
| 9450 | CHEN_LIVER_METABOLISM_QTL_CIS                             | 0.79 | 0.08 | 0 | 0 | 0 | not significant |
| 9451 | GO_CELLULAR_MONOVALENT_INORGANIC_CATION_HOMEOSTASIS       | 0.79 | 0.08 | 0 | 0 | 0 | not significant |
| 9452 | GO_NEURON_PROJECTION_ORGANIZATION                         | 0.79 | 0.08 | 0 | 0 | 0 | not significant |
| 9453 | GOLDRATH_IMMUNE_MEMORY                                    | 0.79 | 0.08 | 0 | 0 | 0 | not significant |
| 9454 | REACTOME_TRANSPORT_OF_INORGANIC_CATIONS_ANIONS_AND_AMIN   | 0.79 | 0.08 | 0 | 0 | 0 | not significant |
| 9455 | PID_CXCR4_PATHWAY                                         | 0.79 | 0.07 | 0 | 0 | 0 | not significant |
| 9456 | GO_N_ACYLTRANSFERASE_ACTIVITY                             | 0.79 | 0.06 | 0 | 0 | 0 | not significant |
| 9457 | GO_SEX_DIFFERENTIATION                                    | 0.79 | 0.05 | 0 | 0 | 0 | not significant |
| 9458 | GO_TRANSFERASE_ACTIVITY_TRANSFERRING_ACYL_GROUPS          | 0.79 | 0.04 | 0 | 0 | 0 | not significant |
| 9459 | IVANOVA_HEMATOPOIESIS_MATURE_CELL                         | 0.79 | 0.03 | 0 | 0 | 0 | not significant |
| 9460 | DOUGLAS_BMI1_TARGETS_DN                                   | 0.79 | 0.02 | 0 | 0 | 0 | not significant |
| 9461 | GO_ENDOSOME                                               | 0.79 | 0.00 | 0 | 0 | 0 | not significant |
| 9462 | GO_ACTOMYOSIN_CONTRACTILE_RING_ORGANIZATION               | 0.80 | 0.16 | 0 | 0 | 0 | not significant |
| 9463 | GO_POSITIVE_REGULATION_OF_ARP2_3_COMPLEX_MEDIATED_ACTIN_N | 0.80 | 0.16 | 0 | 0 | 0 | not significant |
| 9464 | GO_REGULATION_OF_CHOLESTEROL_METABOLIC_PROCESS            | 0.80 | 0.15 | 0 | 0 | 0 | not significant |
| 9465 | GO_REGULATION_OF_VASCULAR_SMOOTH_MUSCLE_CELL_DIFFERENTI   | 0.80 | 0.15 | 0 | 0 | 0 | not significant |
| 9466 | BIOCARTA_PDZS_PATHWAY                                     | 0.80 | 0.14 | 0 | 0 | 0 | not significant |
| 9467 | BIOCARTA_PGC1A_PATHWAY                                    | 0.80 | 0.14 | 0 | 0 | 0 | not significant |
| 9468 | CHR3Q25                                                   | 0.80 | 0.14 | 0 | 0 | 0 | not significant |
| 9469 | FONTAINE_THYROID_TUMOR_UNCERTAIN_MALIGNANCY_DN            | 0.80 | 0.14 | 0 | 0 | 0 | not significant |
| 9470 | GO_ACTIVIN_BINDING                                        | 0.80 | 0.14 | 0 | 0 | 0 | not significant |
| 9471 | GO_COBALAMIN_METABOLIC_PROCESS                            | 0.80 | 0.14 | 0 | 0 | 0 | not significant |



|      |                                                             |      |      |   |   |   |                 |
|------|-------------------------------------------------------------|------|------|---|---|---|-----------------|
| 9472 | GO_ENDOTHELIAL_CELL_CHEMOTAXIS                              | 0.80 | 0.14 | 0 | 0 | 0 | not significant |
| 9473 | GO_EPIBOLY                                                  | 0.80 | 0.14 | 0 | 0 | 0 | not significant |
| 9474 | GO_EUKARYOTIC_TRANSLATION_INITIATION_FACTOR_3_COMPLEX{EIF3} | 0.80 | 0.14 | 0 | 0 | 0 | not significant |
| 9475 | GO_HIPPOCAMPAL_MOSSY_FIBER_TO_CA3_SYNAPSE                   | 0.80 | 0.14 | 0 | 0 | 0 | not significant |
| 9476 | GO_LYS63_SPECIFIC_DEUBIQUITINASE_ACTIVITY                   | 0.80 | 0.14 | 0 | 0 | 0 | not significant |
| 9477 | GO_NEGATIVE_REGULATION_OF_STEM_CELL_DIFFERENTIATION         | 0.80 | 0.14 | 0 | 0 | 0 | not significant |
| 9478 | GO_POSITIVE_REGULATION_OF_ACUTE_INFLAMMATORY_RESPONSE_TO    | 0.80 | 0.14 | 0 | 0 | 0 | not significant |
| 9479 | GO_RESPONSE_TO_DIETARY_EXCESS                               | 0.80 | 0.14 | 0 | 0 | 0 | not significant |
| 9480 | GO_STORE_OPERATED_CALCIIUM_CHANNEL_ACTIVITY                 | 0.80 | 0.14 | 0 | 0 | 0 | not significant |
| 9481 | GO_UVER_TATI_TARGETS_DN                                     | 0.80 | 0.14 | 0 | 0 | 0 | not significant |
| 9482 | REACTOME_DOPAMINE_NEUROTRANSMITTER_RELEASE_CYCLE            | 0.80 | 0.14 | 0 | 0 | 0 | not significant |
| 9483 | REACTOME_TRANSCRIPTION_OF_E2F_TARGETS_UNDER_NEGATIVE_CO     | 0.80 | 0.14 | 0 | 0 | 0 | not significant |
| 9484 | SASSON_FSH_RESPONSE                                         | 0.80 | 0.14 | 0 | 0 | 0 | not significant |
| 9485 | SCIAN_INVERSED_TARGETS_OF_TP53_AND_TP73_UP                  | 0.80 | 0.14 | 0 | 0 | 0 | not significant |
| 9486 | AMUNDSON_DNA_DAMAGE_RESPONSE_TP53                           | 0.80 | 0.13 | 0 | 0 | 0 | not significant |
| 9487 | GO_HISTONE_H3_DEACETYLATION                                 | 0.80 | 0.13 | 0 | 0 | 0 | not significant |
| 9488 | GO_PHENOL_CONTAINING_COMPOUND_BIOSYNTHETIC_PROCESS          | 0.80 | 0.13 | 0 | 0 | 0 | not significant |
| 9489 | GO_PHOSPHATIDYLINOSITOL_3_4_5_TRISPHOSPHATE_BINDING         | 0.80 | 0.13 | 0 | 0 | 0 | not significant |
| 9490 | HOFFMANN_PRE_BI_TO_LARGE_PRE_BI_LYMPHOCYTE_UP               | 0.80 | 0.13 | 0 | 0 | 0 | not significant |
| 9491 | REACTOME_ACYL_CHAIN_REMODELLING_OF_PC                       | 0.80 | 0.13 | 0 | 0 | 0 | not significant |
| 9492 | BAUS_TFF2_TARGETS_UP                                        | 0.80 | 0.12 | 0 | 0 | 0 | not significant |
| 9493 | CHR14Q21                                                    | 0.80 | 0.12 | 0 | 0 | 0 | not significant |
| 9494 | GO_PROTON_EXPORTING_ATPASE_ACTIVITY                         | 0.80 | 0.12 | 0 | 0 | 0 | not significant |
| 9495 | GO_RIBONUCLEOTIDE_CATABOLIC_PROCESS                         | 0.80 | 0.12 | 0 | 0 | 0 | not significant |
| 9496 | SIG_IL4RECEPTOR_IN_B_LPHOCYTES                              | 0.80 | 0.12 | 0 | 0 | 0 | not significant |
| 9497 | PHONG_TNF_TARGETS_UP                                        | 0.80 | 0.11 | 0 | 0 | 0 | not significant |
| 9498 | REACTOME_MICROAUTOPHAGY                                     | 0.80 | 0.11 | 0 | 0 | 0 | not significant |
| 9499 | CHIANG_LIVER_CANCER_SUBCLASS_UNANNOTATED_UP                 | 0.80 | 0.10 | 0 | 0 | 0 | not significant |
| 9500 | GO_REGULATION_OF_AUTOPHAGY_OF_MITOCHONDRION                 | 0.80 | 0.10 | 0 | 0 | 0 | not significant |
| 9501 | KEGG_EPITHELIAL_CELL_SIGNALING_IN_HELICOBACTER_PYLORI_INFEC | 0.80 | 0.10 | 0 | 0 | 0 | not significant |
| 9502 | MARIADASON_REGULATED_BY_HISTONE_ACETYLATION_DN              | 0.80 | 0.10 | 0 | 0 | 0 | not significant |
| 9503 | MARIADASON_REGULATED_BY_HISTONE_ACETYLATION_UP              | 0.80 | 0.10 | 0 | 0 | 0 | not significant |
| 9504 | GO_REGULATION_OF_NEUROTRANSMITTER_SECRETION                 | 0.80 | 0.09 | 0 | 0 | 0 | not significant |
| 9505 | OXFORD_RALA_OR_RALB_TARGETS_UP                              | 0.80 | 0.09 | 0 | 0 | 0 | not significant |
| 9506 | GO_REGULATION_OF_MEGAKARYOCYTE_DIFFERENTIATION              | 0.80 | 0.08 | 0 | 0 | 0 | not significant |
| 9507 | GO_NEGATIVE_REGULATION_OF_PROTEIN_COMPLEX_ASSEMBLY          | 0.80 | 0.07 | 0 | 0 | 0 | not significant |
| 9508 | KRAS_DF.V1_DN                                               | 0.80 | 0.07 | 0 | 0 | 0 | not significant |
| 9509 | LINDGREN_BLADDER_CANCER_CLUSTER_1_UP                        | 0.80 | 0.06 | 0 | 0 | 0 | not significant |
| 9510 | GO_CARBOHYDRATE_BIOSYNTHETIC_PROCESS                        | 0.80 | 0.05 | 0 | 0 | 0 | not significant |
| 9511 | GO_PROTEIN_ACYLATION                                        | 0.80 | 0.05 | 0 | 0 | 0 | not significant |
| 9512 | RIZKI_TUMOR_INVASIVENESS_3D_UP                              | 0.80 | 0.05 | 0 | 0 | 0 | not significant |
| 9513 | GO_PROTEIN_SERINE_THREONINE_KINASE_ACTIVITY                 | 0.80 | 0.02 | 0 | 0 | 0 | not significant |
| 9514 | RAO_BOUND_BY_SALL4_ISOFORM_B                                | 0.80 | 0.02 | 0 | 0 | 0 | not significant |
| 9515 | GO_ECTODERMAL_PLACODE_DEVELOPMENT                           | 0.81 | 0.17 | 0 | 0 | 0 | not significant |
| 9516 | BARRIER_CANCER_RELAPSE_TUMOR_SAMPLE_DN                      | 0.81 | 0.16 | 0 | 0 | 0 | not significant |
| 9517 | GO_REGULATION_OF_STEM_CELL_DIVISION                         | 0.81 | 0.16 | 0 | 0 | 0 | not significant |
| 9518 | GO_ZYMOGEN_GRANULE_MEMBRANE                                 | 0.81 | 0.16 | 0 | 0 | 0 | not significant |
| 9519 | MYLLYKANGAS_AMPLIFICATION_HOT_SPOT_22                       | 0.81 | 0.16 | 0 | 0 | 0 | not significant |
| 9520 | NIKOLSKY_BREAST_CANCER_14Q22_AMPLICON                       | 0.81 | 0.16 | 0 | 0 | 0 | not significant |
| 9521 | REACTOME_FRS_MEDIATED_FGFR2_SIGNALING                       | 0.81 | 0.16 | 0 | 0 | 0 | not significant |
| 9522 | REACTOME_TLR3_MEDIATED_TICAM1_DEPENDENT_PROGRAMMED_CEL      | 0.81 | 0.16 | 0 | 0 | 0 | not significant |
| 9523 | GO_ALDEHYDE_DEHYDROGENASE_NAD_ACTIVITY                      | 0.81 | 0.15 | 0 | 0 | 0 | not significant |
| 9524 | GO_AORTA_MORPHOGENESIS                                      | 0.81 | 0.15 | 0 | 0 | 0 | not significant |
| 9525 | GO_ARRESTIN_FAMILY_PROTEIN_BINDING                          | 0.81 | 0.15 | 0 | 0 | 0 | not significant |
| 9526 | GO_HISTONE_DEMETHYLASE_ACTIVITY_H3_K4_SPECIFIC              | 0.81 | 0.15 | 0 | 0 | 0 | not significant |
| 9527 | GO_MAGNESIUM_ION_TRANSMEMBRANE_TRANSPORTER_ACTIVITY         | 0.81 | 0.15 | 0 | 0 | 0 | not significant |
| 9528 | GO_NEGATIVE_REGULATION_OF_MAST_CELL_ACTIVATION              | 0.81 | 0.15 | 0 | 0 | 0 | not significant |
| 9529 | GO_NEGATIVE_REGULATION_OF_MAST_CELL_ACTIVATION_INVOLVED_I   | 0.81 | 0.15 | 0 | 0 | 0 | not significant |
| 9530 | GO_NEGATIVE_REGULATION_OF_VASCULAR_SMOOTH_MUSCLE_CELL_I     | 0.81 | 0.15 | 0 | 0 | 0 | not significant |
| 9531 | GO_POSITIVE_REGULATION_OF_RELEASE_OF_SEQUESTERED_CALCIIUM   | 0.81 | 0.15 | 0 | 0 | 0 | not significant |
| 9532 | GO_PYRIMIDINE_NUCLEOSIDE_BIOSYNTHETIC_PROCESS               | 0.81 | 0.15 | 0 | 0 | 0 | not significant |
| 9533 | GO_REGULATION_OF_SMOOTHENED_SIGNALING_PATHWAY_INVOLVED      | 0.81 | 0.15 | 0 | 0 | 0 | not significant |
| 9534 | REACTOME_PHASE_4_RESTING_MEMBRANE_POTENTIAL                 | 0.81 | 0.15 | 0 | 0 | 0 | not significant |
| 9535 | WANG_RESPONSE_TO_FORSKOLIN_DN                               | 0.81 | 0.15 | 0 | 0 | 0 | not significant |
| 9536 | CHR4Q12                                                     | 0.81 | 0.14 | 0 | 0 | 0 | not significant |
| 9537 | CHR6P23                                                     | 0.81 | 0.14 | 0 | 0 | 0 | not significant |
| 9538 | FINAK_BREAST_CANCER_SDDP_SIGNATURE                          | 0.81 | 0.14 | 0 | 0 | 0 | not significant |
| 9539 | GO_1_PHOSPHATIDYLINOSITOL_4_KINASE_ACTIVITY                 | 0.81 | 0.14 | 0 | 0 | 0 | not significant |
| 9540 | GO_CELL_BODY_MEMBRANE                                       | 0.81 | 0.14 | 0 | 0 | 0 | not significant |
| 9541 | GO_INTERLEUKIN_21_MEDIATED_SIGNALING_PATHWAY                | 0.81 | 0.14 | 0 | 0 | 0 | not significant |
| 9542 | GO_NUCLEOTIDE_SUGAR_TRANSMEMBRANE_TRANSPORT                 | 0.81 | 0.14 | 0 | 0 | 0 | not significant |
| 9543 | GO_REGULATION_OF_BILE_ACID_METABOLIC_PROCESS                | 0.81 | 0.14 | 0 | 0 | 0 | not significant |
| 9544 | GO_REGULATION_OF_ENDOTHELIAL_CELL_CHEMOTAXIS                | 0.81 | 0.14 | 0 | 0 | 0 | not significant |
| 9545 | GO_SMALL_RIBOSOMAL_SUBUNIT_RRNA_BINDING                     | 0.81 | 0.14 | 0 | 0 | 0 | not significant |
| 9546 | PATTERSON_DOCETAXEL_RESISTANCE                              | 0.81 | 0.14 | 0 | 0 | 0 | not significant |
| 9547 | REACTOME_FRS_MEDIATED_FGFR4_SIGNALING                       | 0.81 | 0.14 | 0 | 0 | 0 | not significant |
| 9548 | REACTOME_NEGATIVE_REGULATION_OF_FGFR2_SIGNALING             | 0.81 | 0.14 | 0 | 0 | 0 | not significant |
| 9549 | STAMBOLSKY_RESPONSE_TO_VITAMIN_D3_DN                        | 0.81 | 0.14 | 0 | 0 | 0 | not significant |
| 9550 | BRIDEAU_IMPRINTED_GENES                                     | 0.81 | 0.13 | 0 | 0 | 0 | not significant |
| 9551 | GO_DORSAL_VENTRAL_NEURAL_TUBE_PATTERNING                    | 0.81 | 0.13 | 0 | 0 | 0 | not significant |
| 9552 | GO_ESTABLISHMENT_OF_ENDOTHELIAL_BARRIER                     | 0.81 | 0.13 | 0 | 0 | 0 | not significant |
| 9553 | GO_HEART TRABECULA_MORPHOGENESIS                            | 0.81 | 0.13 | 0 | 0 | 0 | not significant |
| 9554 | GO_POLY_A_SPECIFIC_RIBONUCLEASE_ACTIVITY                    | 0.81 | 0.13 | 0 | 0 | 0 | not significant |
| 9555 | GO_POSITIVE_REGULATION_OF_FOCAL_ADHESION_ASSEMBLY           | 0.81 | 0.13 | 0 | 0 | 0 | not significant |
| 9556 | GO_POSITIVE_REGULATION_OF_MICROTUBULE_POLYMERIZATION_OR_I   | 0.81 | 0.13 | 0 | 0 | 0 | not significant |
| 9557 | PID_CIRCADIAN_PATHWAY                                       | 0.81 | 0.13 | 0 | 0 | 0 | not significant |
| 9558 | REACTOME_MYOGENESIS                                         | 0.81 | 0.13 | 0 | 0 | 0 | not significant |
| 9559 | CORRE_MULTIPLE_MYELOMA_DN                                   | 0.81 | 0.12 | 0 | 0 | 0 | not significant |
| 9560 | ENGELMANN_CANCER_PROGENITORS_UP                             | 0.81 | 0.12 | 0 | 0 | 0 | not significant |
| 9561 | GO_COFACTOR_TRANSPORT                                       | 0.81 | 0.12 | 0 | 0 | 0 | not significant |
| 9562 | GO_ENDOTHELIAL_CELL_DEVELOPMENT                             | 0.81 | 0.12 | 0 | 0 | 0 | not significant |
| 9563 | GO_G0_TO_G1_TRANSITION                                      | 0.81 | 0.12 | 0 | 0 | 0 | not significant |
| 9564 | GO_NEGATIVE_REGULATION_OF_LIPID_METABOLIC_PROCESS           | 0.81 | 0.12 | 0 | 0 | 0 | not significant |
| 9565 | GO_NEGATIVE_REGULATION_OF_OSSIFICATION                      | 0.81 | 0.12 | 0 | 0 | 0 | not significant |
| 9566 | GO_PROTON_TRANSPORTING_TWO_SECTOR_ATPASE_COMPLEX            | 0.81 | 0.12 | 0 | 0 | 0 | not significant |
| 9567 | GO_RAC_PROTEIN_SIGNAL_TRANSDUCTION                          | 0.81 | 0.12 | 0 | 0 | 0 | not significant |
| 9568 | GO_TRANSFERASE_ACTIVITY_TRANSFERRING_PENTOSYL_GROUPS        | 0.81 | 0.12 | 0 | 0 | 0 | not significant |
| 9569 | GO_UNSATURATED_FATTY_ACID_METABOLIC_PROCESS                 | 0.81 | 0.12 | 0 | 0 | 0 | not significant |
| 9570 | LASTOWSKA_COAMPLIFIED_WITH_MYCN                             | 0.81 | 0.12 | 0 | 0 | 0 | not significant |
| 9571 | WEIGEL_OXIDATIVE_STRESS_BY_HNE_AND_TBH                      | 0.81 | 0.12 | 0 | 0 | 0 | not significant |
| 9572 | GO_CELLULAR_RESPONSE_TO_VIRUS                               | 0.81 | 0.11 | 0 | 0 | 0 | not significant |
| 9573 | GO_ESCRT_COMPLEX                                            | 0.81 | 0.11 | 0 | 0 | 0 | not significant |
| 9574 | GO_HISTONE_H3_K4_METHYLATION                                | 0.81 | 0.11 | 0 | 0 | 0 | not significant |
| 9575 | GO_ODONTOGENESIS                                            | 0.81 | 0.11 | 0 | 0 | 0 | not significant |
| 9576 | GO_REGULATION_OF_LIPID_CATABOLIC_PROCESS                    | 0.81 | 0.11 | 0 | 0 | 0 | not significant |
| 9577 | KRAS_LUNG_BREAST_UP_V1_UP                                   | 0.81 | 0.10 | 0 | 0 | 0 | not significant |
| 9578 | GO_EPIDERMAL_GROWTH_FACTOR_RECEPTOR_SIGNALING_PATHWAY       | 0.81 | 0.09 | 0 | 0 | 0 | not significant |
| 9579 | GO_NEGATIVE_REGULATION_OF_RESPONSE_TO_DNA_DAMAGE_STIMUL     | 0.81 | 0.09 | 0 | 0 | 0 | not significant |
| 9580 | GO_SPERM_PART                                               | 0.81 | 0.09 | 0 | 0 | 0 | not significant |

|      |                                                            |      |      |   |   |   |                 |
|------|------------------------------------------------------------|------|------|---|---|---|-----------------|
| 9581 | KOKKINAKIS METHIONINE DEPRIVATION_96HR_UP                  | 0.81 | 0.08 | 0 | 0 | 0 | not significant |
| 9582 | GO_RECOMBINATIONAL_REPAIR                                  | 0.81 | 0.07 | 0 | 0 | 0 | not significant |
| 9583 | FOSTER_KDM1A_TARGETS_DN                                    | 0.81 | 0.06 | 0 | 0 | 0 | not significant |
| 9584 | GO_DEVELOPMENTAL_PROCESS_INVOLVED_IN_REPRODUCTION          | 0.81 | 0.03 | 0 | 0 | 0 | not significant |
| 9585 | BRUINS_UVC_RESPONSE_VIA_TP53_GROUP_A                       | 0.81 | 0.01 | 0 | 0 | 0 | not significant |
| 9586 | GO_NUCLEOTIDE_SUGAR_TRANSMEMBRANE_TRANSPORTER_ACTIVITY     | 0.82 | 0.18 | 0 | 0 | 0 | not significant |
| 9587 | CHR4P12                                                    | 0.82 | 0.17 | 0 | 0 | 0 | not significant |
| 9588 | GO_BLOOD_VESSEL_ENDOTHELIAL_CELL_PROLIFERATION_INVOLVED_I  | 0.82 | 0.17 | 0 | 0 | 0 | not significant |
| 9589 | GO_CELLULAR_RESPONSE_TO_INTERFERON_ALPHA                   | 0.82 | 0.17 | 0 | 0 | 0 | not significant |
| 9590 | GO_ELL_EAF_COMPLEX                                         | 0.82 | 0.17 | 0 | 0 | 0 | not significant |
| 9591 | GO_INTRAMOLECULAR_OXIDOREDUCTASE_ACTIVITY_INTERCONVERTING  | 0.82 | 0.17 | 0 | 0 | 0 | not significant |
| 9592 | GO_MHC_CLASS_II_BIOSYNTHETIC_PROCESS                       | 0.82 | 0.17 | 0 | 0 | 0 | not significant |
| 9593 | GO_MOTOR_BEHAVIOR                                          | 0.82 | 0.17 | 0 | 0 | 0 | not significant |
| 9594 | GO_SPECIFICATION_OF_ANIMAL_ORGAN_IDENTITY                  | 0.82 | 0.17 | 0 | 0 | 0 | not significant |
| 9595 | KEGG_PENTOSE_AND_GLCURONATE_INTERCONVERSIONS               | 0.82 | 0.17 | 0 | 0 | 0 | not significant |
| 9596 | PID_TOLL_ENDOGENOUS_PATHWAY                                | 0.82 | 0.17 | 0 | 0 | 0 | not significant |
| 9597 | REACTOME_EICOSANOIDS                                       | 0.82 | 0.17 | 0 | 0 | 0 | not significant |
| 9598 | REACTOME_POLB_DEPENDENT_LONG_PATCH_BASE_EXCISION_REPAIR    | 0.82 | 0.17 | 0 | 0 | 0 | not significant |
| 9599 | REACTOME_SYNTHESIS_OF_PG                                   | 0.82 | 0.17 | 0 | 0 | 0 | not significant |
| 9600 | CHR13Q13                                                   | 0.82 | 0.16 | 0 | 0 | 0 | not significant |
| 9601 | GO_1_PHOSPHATIDYLINOSITOL_BINDING                          | 0.82 | 0.16 | 0 | 0 | 0 | not significant |
| 9602 | GO_DOPAMINERGIC_SYNAPSE                                    | 0.82 | 0.16 | 0 | 0 | 0 | not significant |
| 9603 | GO_INNervation                                             | 0.82 | 0.16 | 0 | 0 | 0 | not significant |
| 9604 | GO_L_ASCORBIC_ACID_BINDING                                 | 0.82 | 0.16 | 0 | 0 | 0 | not significant |
| 9605 | GO_POSITIVE_REGULATION_OF_MAST_CELL_ACTIVATION_INVOLVED_IN | 0.82 | 0.16 | 0 | 0 | 0 | not significant |
| 9606 | GO_VERY_LONG_CHAIN_FATTY_ACID_COA_LIGASE_ACTIVITY          | 0.82 | 0.16 | 0 | 0 | 0 | not significant |
| 9607 | GO_VOCALIZATION_BEHAVIOR                                   | 0.82 | 0.16 | 0 | 0 | 0 | not significant |
| 9608 | REACTOME_TRAFFICKING_OF_GLUR2_CONTAINING_AMPA_RECEPTORS    | 0.82 | 0.16 | 0 | 0 | 0 | not significant |
| 9609 | GO_CORNIFICATION                                           | 0.82 | 0.15 | 0 | 0 | 0 | not significant |
| 9610 | GO_ENERGY_COUPLED_PROTON_TRANSMEMBRANE_TRANSPORT_AGAI      | 0.82 | 0.15 | 0 | 0 | 0 | not significant |
| 9611 | GO_GLIAL_CELL_PROJECTION                                   | 0.82 | 0.15 | 0 | 0 | 0 | not significant |
| 9612 | GO_MICROTUBULE_MINUS_END_BINDING                           | 0.82 | 0.15 | 0 | 0 | 0 | not significant |
| 9613 | GO_NEGATIVE_REGULATION_OF_PLASMA_MEMBRANE_BOUNDED_CELL     | 0.82 | 0.15 | 0 | 0 | 0 | not significant |
| 9614 | GO_NEUROFILIN_BINDING                                      | 0.82 | 0.15 | 0 | 0 | 0 | not significant |
| 9615 | GO_PEPTIDYL_L_CYSINE_S_PALMITOYLATION                      | 0.82 | 0.15 | 0 | 0 | 0 | not significant |
| 9616 | GO_POSITIVE_REGULATION_OF_INTERLEUKIN_6_BIOSYNTHETIC_PROCE | 0.82 | 0.15 | 0 | 0 | 0 | not significant |
| 9617 | GO_SUBSTRATE_DEPENDENT_CELL_MIGRATION                      | 0.82 | 0.15 | 0 | 0 | 0 | not significant |
| 9618 | GO_THYMIC_T_CELL_SELECTION                                 | 0.82 | 0.15 | 0 | 0 | 0 | not significant |
| 9619 | MYLLYKANGAS_AMPLIFICATION_HOT_SPOT_12                      | 0.82 | 0.15 | 0 | 0 | 0 | not significant |
| 9620 | REACTOME_NEGATIVE_REGULATION_OF_FGFR4_SIGNALING            | 0.82 | 0.15 | 0 | 0 | 0 | not significant |
| 9621 | GO_CELLULAR_RESPONSE_TO_ARSENIC_CONTAINING_SUBSTANCE       | 0.82 | 0.14 | 0 | 0 | 0 | not significant |
| 9622 | GO_NEGATIVE_REGULATION_OF_ENDOCYTOSIS                      | 0.82 | 0.14 | 0 | 0 | 0 | not significant |
| 9623 | GO_POLY_A_BINDING                                          | 0.82 | 0.14 | 0 | 0 | 0 | not significant |
| 9624 | GO_POSITIVE_REGULATION_OF_CYTOPLASMIC_TRANSPORT            | 0.82 | 0.14 | 0 | 0 | 0 | not significant |
| 9625 | GO_PRESYNAPSE_ORGANIZATION                                 | 0.82 | 0.14 | 0 | 0 | 0 | not significant |
| 9626 | GO_REGULATION_OF_COAGULATION                               | 0.82 | 0.14 | 0 | 0 | 0 | not significant |
| 9627 | GO_REGULATION_OF_CYSINE_TYR_ENDOPEPTIDASE_ACTIVITY_INV     | 0.82 | 0.14 | 0 | 0 | 0 | not significant |
| 9628 | REACTOME_ROS_AND_RNS_PRODUCTION_IN_PHAGOCYTES              | 0.82 | 0.14 | 0 | 0 | 0 | not significant |
| 9629 | REACTOME_SPHINGOLIPID_DE_NOVO_BIOSYNTHESIS                 | 0.82 | 0.14 | 0 | 0 | 0 | not significant |
| 9630 | REACTOME_VXPX_CARGO_TARGETING_TO_CILIUM                    | 0.82 | 0.14 | 0 | 0 | 0 | not significant |
| 9631 | WEIGEL_OXIDATIVE_STRESS_BY_HNE_AND_H2O2                    | 0.82 | 0.14 | 0 | 0 | 0 | not significant |
| 9632 | ZHAN_V1_LATE_DIFFERENTIATION_GENES_UP                      | 0.82 | 0.14 | 0 | 0 | 0 | not significant |
| 9633 | GO_LIGASE_ACTIVITY_FORMING_CARBON_NITROGEN_BONDS           | 0.82 | 0.13 | 0 | 0 | 0 | not significant |
| 9634 | GO_NEGATIVE_REGULATION_OF_ERBB_SIGNALING_PATHWAY           | 0.82 | 0.13 | 0 | 0 | 0 | not significant |
| 9635 | GO_PRODUCTION_OF_MOLECULAR_MEDIATOR_INVOLVED_IN_INFLAMM    | 0.82 | 0.13 | 0 | 0 | 0 | not significant |
| 9636 | MOSERLE_IFNA_RESPONSE                                      | 0.82 | 0.13 | 0 | 0 | 0 | not significant |
| 9637 | ALK_DN.V1_DN                                               | 0.82 | 0.12 | 0 | 0 | 0 | not significant |
| 9638 | CHR17Q12                                                   | 0.82 | 0.12 | 0 | 0 | 0 | not significant |
| 9639 | GO_CIS_GOLGI_NETWORK                                       | 0.82 | 0.12 | 0 | 0 | 0 | not significant |
| 9640 | GO_INNER_EAR_MORPHOGENESIS                                 | 0.82 | 0.12 | 0 | 0 | 0 | not significant |
| 9641 | MORI_IMMATURE_B_LYMPHOCYTE_UP                              | 0.82 | 0.12 | 0 | 0 | 0 | not significant |
| 9642 | REACTOME_G1_PHASE                                          | 0.82 | 0.12 | 0 | 0 | 0 | not significant |
| 9643 | DIRMEIER_LMP1_RESPONSE_LATE_DN                             | 0.82 | 0.11 | 0 | 0 | 0 | not significant |
| 9644 | GO_PROTEASE_BINDING                                        | 0.82 | 0.11 | 0 | 0 | 0 | not significant |
| 9645 | GO_SH3_SH2_ADAPTOR_ACTIVITY                                | 0.82 | 0.11 | 0 | 0 | 0 | not significant |
| 9646 | KYNG_DNA_DAMAGE_BY_GAMMA_AND_UV_RADIATION                  | 0.82 | 0.11 | 0 | 0 | 0 | not significant |
| 9647 | MORI_SMALL_PRE_BII_LYMPHOCYTE_UP                           | 0.82 | 0.11 | 0 | 0 | 0 | not significant |
| 9648 | GO_CELL_AGING                                              | 0.82 | 0.10 | 0 | 0 | 0 | not significant |
| 9649 | GO_POSITIVE_REGULATION_OF_RESPONSE_TO_DNA_DAMAGE_STIMULI   | 0.82 | 0.10 | 0 | 0 | 0 | not significant |
| 9650 | CHR1Q21                                                    | 0.82 | 0.09 | 0 | 0 | 0 | not significant |
| 9651 | GO_ACTIN_CYTOSKELETON_REORGANIZATION                       | 0.82 | 0.09 | 0 | 0 | 0 | not significant |
| 9652 | GO_EXOCYTIC_VESICLE                                        | 0.82 | 0.09 | 0 | 0 | 0 | not significant |
| 9653 | VERHAAK_GLIOMASTOMA_CLASSICAL                              | 0.82 | 0.09 | 0 | 0 | 0 | not significant |
| 9654 | PUFFE_INVASION_INHIBITED_BY_ASCITES_DN                     | 0.82 | 0.08 | 0 | 0 | 0 | not significant |
| 9655 | GO_DNA_DEPENDENT_DNA_REPLICATION                           | 0.82 | 0.07 | 0 | 0 | 0 | not significant |
| 9656 | GO_ENDOCYTIC_VESICLE_MEMBRANE                              | 0.82 | 0.07 | 0 | 0 | 0 | not significant |
| 9657 | GO_MOLECULAR_ADAPTOR_ACTIVITY                              | 0.82 | 0.07 | 0 | 0 | 0 | not significant |
| 9658 | BLALOCK_ALZHEIMERS_DISEASE_INCIPENT_UP                     | 0.82 | 0.04 | 0 | 0 | 0 | not significant |
| 9659 | GO_CILIARY_PART                                            | 0.82 | 0.04 | 0 | 0 | 0 | not significant |
| 9660 | GO_TRANSCRIPTION_COACTIVATOR_ACTIVITY                      | 0.82 | 0.04 | 0 | 0 | 0 | not significant |
| 9661 | GO_REGULATION_OF_NEURON_DIFFERENTIATION                    | 0.82 | 0.03 | 0 | 0 | 0 | not significant |
| 9662 | GO_GOLGI_APPARATUS_PART                                    | 0.82 | 0.01 | 0 | 0 | 0 | not significant |
| 9663 | GO_POSITIVE_REGULATION_OF_RNA_BIOSYNTHETIC_PROCESS         | 0.82 | 0.01 | 0 | 0 | 0 | not significant |
| 9664 | FLORIO_HUMAN_NEOCORTEX                                     | 0.83 | 0.18 | 0 | 0 | 0 | not significant |
| 9665 | GO_MACROPHAGE_ACTIVATION_INVOLVED_IN_IMMUNE_RESPONSE       | 0.83 | 0.18 | 0 | 0 | 0 | not significant |
| 9666 | GO_PLATELET_DERIVED_GROWTH_FACTOR_RECEPTOR_BINDING         | 0.83 | 0.18 | 0 | 0 | 0 | not significant |
| 9667 | GO_POSITIVE_REGULATION_OF_MITOTIC_SISTER_CHROMATID_SEPARA  | 0.83 | 0.18 | 0 | 0 | 0 | not significant |
| 9668 | GO_POSTSYNAPTIC_MODULATION_OF_CHEMICAL_SYNAPTIC_TRANSMIS   | 0.83 | 0.18 | 0 | 0 | 0 | not significant |
| 9669 | GO_REGULATION_OF_ENDOTHELIAL_CELL_DEVELOPMENT              | 0.83 | 0.18 | 0 | 0 | 0 | not significant |
| 9670 | NIELSEN_MALIGNANT_FIBROUS_HISTIOCYTOMA_DN                  | 0.83 | 0.18 | 0 | 0 | 0 | not significant |
| 9671 | REACTOME_SMALL_INTERFERING_RNA_SIRNA_BIOGENESIS            | 0.83 | 0.18 | 0 | 0 | 0 | not significant |
| 9672 | DACOSTA_ERCC3_ALLELE_XPCS_VS_TTD_DN                        | 0.83 | 0.17 | 0 | 0 | 0 | not significant |
| 9673 | GO_PARKIN_MEDIATED_STIMULATION_OF_MITOPHAGY_IN_RESPONSE_T  | 0.83 | 0.17 | 0 | 0 | 0 | not significant |
| 9674 | GO_POSITIVE_REGULATION_OF_CELL_AGING                       | 0.83 | 0.17 | 0 | 0 | 0 | not significant |
| 9675 | GO_POSITIVE_REGULATION_OF_FC_GAMMA_RECEPTOR_SIGNALING_PA   | 0.83 | 0.17 | 0 | 0 | 0 | not significant |
| 9676 | GO_POST_EMBRYONIC_EYE_MORPHOGENESIS                        | 0.83 | 0.17 | 0 | 0 | 0 | not significant |
| 9677 | KYNG_DNA_DAMAGE_BY_4NQO                                    | 0.83 | 0.17 | 0 | 0 | 0 | not significant |
| 9678 | REACTOME_NUCLEOTIDE_LIKE_PURINERGIC_RECEPTORS              | 0.83 | 0.17 | 0 | 0 | 0 | not significant |
| 9679 | ABE_INNER_EAR                                              | 0.83 | 0.16 | 0 | 0 | 0 | not significant |
| 9680 | BIOCARTA_RECK_PATHWAY                                      | 0.83 | 0.16 | 0 | 0 | 0 | not significant |
| 9681 | KEGG_GLYCOSAMINOGLYCAN_BIOSYNTHESIS_HEPARAN_SULFATE        | 0.83 | 0.16 | 0 | 0 | 0 | not significant |
| 9682 | REACTOME_BLOOD_GROUP_SYSTEMS_BIOSYNTHESIS                  | 0.83 | 0.16 | 0 | 0 | 0 | not significant |
| 9683 | REACTOME_NF_KB_ACTIVATION_THROUGH_FADD_RIP_1_PATHWAY_ME    | 0.83 | 0.16 | 0 | 0 | 0 | not significant |
| 9684 | SHPP_DLBCL_CURED_VS_FATAL_UP                               | 0.83 | 0.16 | 0 | 0 | 0 | not significant |
| 9685 | VALK_AML_CLUSTER_8                                         | 0.83 | 0.16 | 0 | 0 | 0 | not significant |
| 9686 | GO_B_CELL_APOPTOTIC_PROCESS                                | 0.83 | 0.15 | 0 | 0 | 0 | not significant |
| 9687 | GO_CARDIAC_MUSCLE_CELL_ACTION_POTENTIAL                    | 0.83 | 0.15 | 0 | 0 | 0 | not significant |
| 9688 | GO_EMBRYONIC_SKELETAL_JOINT_DEVELOPMENT                    | 0.83 | 0.15 | 0 | 0 | 0 | not significant |
| 9689 | GO_GLYCEROLIPID_CATABOLIC_PROCESS                          | 0.83 | 0.15 | 0 | 0 | 0 | not significant |

|      |                                                            |      |      |   |   |   |                 |
|------|------------------------------------------------------------|------|------|---|---|---|-----------------|
| 9690 | GO_HOLLIDAY_JUNCTION_RESOLVASE_COMPLEX                     | 0.83 | 0.15 | 0 | 0 | 0 | not significant |
| 9691 | GO_KERATINIZATION                                          | 0.83 | 0.15 | 0 | 0 | 0 | not significant |
| 9692 | GO_MOLTING_CYCLE_PROCESS                                   | 0.83 | 0.15 | 0 | 0 | 0 | not significant |
| 9693 | GO_NEGATIVE_REGULATION_OF_SYNAPTIC_VESICLE_TRANSPORT       | 0.83 | 0.15 | 0 | 0 | 0 | not significant |
| 9694 | GO_NUCLEOTIDE_SUGAR_BIOSYNTHETIC_PROCESS                   | 0.83 | 0.15 | 0 | 0 | 0 | not significant |
| 9695 | GO_OXIDOREDUCTASE_ACTIVITY_ACTING_ON_PAIRED_DONORS_WITH_I  | 0.83 | 0.15 | 0 | 0 | 0 | not significant |
| 9696 | GO_POSITIVE_REGULATION_OF_INTERLEUKIN_2_BIOSYNTHETIC_PROCE | 0.83 | 0.15 | 0 | 0 | 0 | not significant |
| 9697 | GO_PROTEIN_HORMONE_RECEPTOR_ACTIVITY                       | 0.83 | 0.15 | 0 | 0 | 0 | not significant |
| 9698 | GO_REGULATION_OF_INTRINSIC_APOPTOTIC_SIGNALING_PATHWAY_BY  | 0.83 | 0.15 | 0 | 0 | 0 | not significant |
| 9699 | GO_REGULATION_OF_MICROTUBULE_POLYMERIZATION                | 0.83 | 0.15 | 0 | 0 | 0 | not significant |
| 9700 | GO_TRANSFERASE_ACTIVITY_TRANSFERRING_AMINO_ACYL_GROUPS     | 0.83 | 0.15 | 0 | 0 | 0 | not significant |
| 9701 | LEE_LIVER_CANCER_ACOX1_DN                                  | 0.83 | 0.15 | 0 | 0 | 0 | not significant |
| 9702 | BIOCARTA_CBL_PATHWAY                                       | 0.83 | 0.14 | 0 | 0 | 0 | not significant |
| 9703 | GO_BONE_MINERALIZATION                                     | 0.83 | 0.14 | 0 | 0 | 0 | not significant |
| 9704 | GO_ERYTHROCYTE_DEVELOPMENT                                 | 0.83 | 0.14 | 0 | 0 | 0 | not significant |
| 9705 | GO_EXTRINSIC_COMPONENT_OF_CYTOPLASMIC_SIDE_OF_PLASMA_MEI   | 0.83 | 0.14 | 0 | 0 | 0 | not significant |
| 9706 | GO_GOLGI_TO_PLASMA_MEMBRANE_PROTEIN_TRANSPORT              | 0.83 | 0.14 | 0 | 0 | 0 | not significant |
| 9707 | PID_EPHRINB_REV_PATHWAY                                    | 0.83 | 0.14 | 0 | 0 | 0 | not significant |
| 9708 | GINESTIER_BREAST_CANCER_ZNF217_AMPLIFIED_UP                | 0.83 | 0.13 | 0 | 0 | 0 | not significant |
| 9709 | GO_EMBRYONIC_SKELETAL_SYSTEM_MORPHOGENESIS                 | 0.83 | 0.12 | 0 | 0 | 0 | not significant |
| 9710 | GO_NEGATIVE_REGULATION_OF_PROTEASOMAL_PROTEIN_CATABOLIC    | 0.83 | 0.12 | 0 | 0 | 0 | not significant |
| 9711 | GO_PRESYNAPTIC_MEMBRANE                                    | 0.83 | 0.12 | 0 | 0 | 0 | not significant |
| 9712 | MCLACHLAN_DENTAL_CARIES_DN                                 | 0.83 | 0.12 | 0 | 0 | 0 | not significant |
| 9713 | WINTER_HYPOXIA_DN                                          | 0.83 | 0.12 | 0 | 0 | 0 | not significant |
| 9714 | AMBROSINI_FLAVOPIRIDOL_TREATMENT_TP53                      | 0.83 | 0.10 | 0 | 0 | 0 | not significant |
| 9715 | CHR20Q11                                                   | 0.83 | 0.10 | 0 | 0 | 0 | not significant |
| 9716 | GO_ENDONUCLEASE_ACTIVITY                                   | 0.83 | 0.09 | 0 | 0 | 0 | not significant |
| 9717 | GO_LOCALIZATION_WITHIN_MEMBRANE                            | 0.83 | 0.09 | 0 | 0 | 0 | not significant |
| 9718 | GO_PHOSPHATASE_BINDING                                     | 0.83 | 0.09 | 0 | 0 | 0 | not significant |
| 9719 | GO_PHOSPHATIDYLINOSITOL_BIOSYNTHETIC_PROCESS               | 0.83 | 0.09 | 0 | 0 | 0 | not significant |
| 9720 | GO_RESPONSE_TO_TRANSFORMING_GROWTH_FACTOR_BETA             | 0.83 | 0.09 | 0 | 0 | 0 | not significant |
| 9721 | GO_SIGNAL_RELEASE_FROM_SYNAPSE                             | 0.83 | 0.09 | 0 | 0 | 0 | not significant |
| 9722 | NING_CHRONIC_OBSTRUCTIVE_PULMONARY_DISEASE_UP              | 0.83 | 0.09 | 0 | 0 | 0 | not significant |
| 9723 | GO_POSITIVE_REGULATION_OF_I_KAPPAB_KINASE_NF_KAPPAB_SIGNAL | 0.83 | 0.07 | 0 | 0 | 0 | not significant |
| 9724 | GO_DNA_RECOMBINATION                                       | 0.83 | 0.06 | 0 | 0 | 0 | not significant |
| 9725 | GO_POSITIVE_REGULATION_OF_CELL_CYCLE_PROCESS               | 0.83 | 0.06 | 0 | 0 | 0 | not significant |
| 9726 | DEURIG_T_CELL_PROLYMPHOCTIC_LEUKEMIA_DN                    | 0.83 | 0.05 | 0 | 0 | 0 | not significant |
| 9727 | GO_POSITIVE_REGULATION_OF_MAPK_CASCADE                     | 0.83 | 0.05 | 0 | 0 | 0 | not significant |
| 9728 | GO_CELL_PROJECTION_ASSEMBLY                                | 0.83 | 0.04 | 0 | 0 | 0 | not significant |
| 9729 | GO_CELL_MORPHOGENESIS_INVOLVED_IN_DIFFERENTIATION          | 0.83 | 0.03 | 0 | 0 | 0 | not significant |
| 9730 | GO_KINASE_BINDING                                          | 0.83 | 0.02 | 0 | 0 | 0 | not significant |
| 9731 | GO_POSITIVE_REGULATION_OF_TRANSCRIPTION_BY_RNA_POLYMERASI  | 0.83 | 0.02 | 0 | 0 | 0 | not significant |
| 9732 | GO_TRANSCRIPTION_FACTOR_BINDING                            | 0.83 | 0.02 | 0 | 0 | 0 | not significant |
| 9733 | GO_CELL_PROJECTION_PART                                    | 0.83 | 0.01 | 0 | 0 | 0 | not significant |
| 9734 | GO_INTRACELLULAR_PROTEIN_TRANSPORT                         | 0.83 | 0.01 | 0 | 0 | 0 | not significant |
| 9735 | GO_RACEMASE_AND_EPIMERASE_ACTIVITY_ACTING_ON_CARBOHYDRA    | 0.84 | 0.19 | 0 | 0 | 0 | not significant |
| 9736 | GO SOMATIC DIVERSIFICATION OF IMMUNE RECEPTORS VIA SOMATK  | 0.84 | 0.19 | 0 | 0 | 0 | not significant |
| 9737 | GO_LUTEINIZATION                                           | 0.84 | 0.18 | 0 | 0 | 0 | not significant |
| 9738 | GO_LYMPH_VESSEL_MORPHOGENESIS                              | 0.84 | 0.18 | 0 | 0 | 0 | not significant |
| 9739 | GO_MHC_CLASS_I_PROTEIN_BINDING                             | 0.84 | 0.18 | 0 | 0 | 0 | not significant |
| 9740 | GO_NEGATIVE_REGULATION_OF_NEUROINFLAMMATORY_RESPONSE       | 0.84 | 0.18 | 0 | 0 | 0 | not significant |
| 9741 | HE_PTEN_TARGETS_DN                                         | 0.84 | 0.18 | 0 | 0 | 0 | not significant |
| 9742 | WANG_IMMORTALIZED_BY_HOXA9_AND_MEIS1_UP                    | 0.84 | 0.18 | 0 | 0 | 0 | not significant |
| 9743 | WENG_POR_TARGETS_LIVER_DN                                  | 0.84 | 0.18 | 0 | 0 | 0 | not significant |
| 9744 | DING_LUNG_CANCER_MUTATED_RECURRENTLY                       | 0.84 | 0.17 | 0 | 0 | 0 | not significant |
| 9745 | GO_CYTOPLASMIC_PATTERN_RECOGNITION_RECEPTOR_SIGNALING_P/   | 0.84 | 0.17 | 0 | 0 | 0 | not significant |
| 9746 | GO_EMBRYONIC_HEMOPOIESIS                                   | 0.84 | 0.17 | 0 | 0 | 0 | not significant |
| 9747 | GO_HINDBRAIN_MORPHOGENESIS                                 | 0.84 | 0.17 | 0 | 0 | 0 | not significant |
| 9748 | GO_HOPS_COMPLEX                                            | 0.84 | 0.17 | 0 | 0 | 0 | not significant |
| 9749 | GO_POSITIVE_REGULATION_OF_CELL_JUNCTION_ASSEMBLY           | 0.84 | 0.17 | 0 | 0 | 0 | not significant |
| 9750 | GO POSITIVE REGULATION OF DOUBLE STRAND BREAK REPAIR VIA   | 0.84 | 0.17 | 0 | 0 | 0 | not significant |
| 9751 | GO_POSITIVE_REGULATION_OF GRANULOCYTE_DIFFERENTIATION      | 0.84 | 0.17 | 0 | 0 | 0 | not significant |
| 9752 | GO_RIBOSOMAL_SMALL_SUBUNIT_ASSEMBLY                        | 0.84 | 0.17 | 0 | 0 | 0 | not significant |
| 9753 | GO_TITIN_BINDING                                           | 0.84 | 0.17 | 0 | 0 | 0 | not significant |
| 9754 | GO_WNT_SIGNALOSOME                                         | 0.84 | 0.17 | 0 | 0 | 0 | not significant |
| 9755 | KANG_CISPLATIN_RESISTANCE_DN                               | 0.84 | 0.17 | 0 | 0 | 0 | not significant |
| 9756 | MIKKELSEN_MCV6_ICP_WITH_H3K4ME3_AND_H3K27ME3               | 0.84 | 0.17 | 0 | 0 | 0 | not significant |
| 9757 | NABA_BASEMENT_MEMBRANES                                    | 0.84 | 0.17 | 0 | 0 | 0 | not significant |
| 9758 | REACTOME_O_LINKED_GLYCOSYLATION_OF_MUCINS                  | 0.84 | 0.17 | 0 | 0 | 0 | not significant |
| 9759 | REACTOME_TP53_REGULATES_TRANSCRIPTION_OF_CASPASE_ACTIVAT   | 0.84 | 0.17 | 0 | 0 | 0 | not significant |
| 9760 | ZHANG_RESPONSE_TO_CANTHARIDIN_UP                           | 0.84 | 0.17 | 0 | 0 | 0 | not significant |
| 9761 | CHR6Q14                                                    | 0.84 | 0.16 | 0 | 0 | 0 | not significant |
| 9762 | GO_DNA_DIRECTED_DNA_POLYMERASE_ACTIVITY                    | 0.84 | 0.16 | 0 | 0 | 0 | not significant |
| 9763 | GO_GUANOSINE_CONTAINING_COMPOUND_BIOSYNTHETIC_PROCESS      | 0.84 | 0.16 | 0 | 0 | 0 | not significant |
| 9764 | GO_MYELOID_DENDRITIC_CELL_DIFFERENTIATION                  | 0.84 | 0.16 | 0 | 0 | 0 | not significant |
| 9765 | GO POSITIVE REGULATION OF CELLULAR RESPONSE TO TRANSFOR    | 0.84 | 0.16 | 0 | 0 | 0 | not significant |
| 9766 | GO_POSITIVE_REGULATION_OF_HISTONE_METHYLATION              | 0.84 | 0.16 | 0 | 0 | 0 | not significant |
| 9767 | GO_RESPONSE_TO_SODIUM_ARSENITE                             | 0.84 | 0.16 | 0 | 0 | 0 | not significant |
| 9768 | MEISSNER_BRAIN_ICP_WITH_H3K4ME3                            | 0.84 | 0.16 | 0 | 0 | 0 | not significant |
| 9769 | MYLLYKANGAS_AMPLIFICATION_HOT_SPOT_5                       | 0.84 | 0.16 | 0 | 0 | 0 | not significant |
| 9770 | PID_TCR_RAS_PATHWAY                                        | 0.84 | 0.16 | 0 | 0 | 0 | not significant |
| 9771 | POS_HISTAMINE_RESPONSE_NETWORK                             | 0.84 | 0.16 | 0 | 0 | 0 | not significant |
| 9772 | REACTOME_EFFECTS_OF_PIP2_HYDROLYSIS                        | 0.84 | 0.16 | 0 | 0 | 0 | not significant |
| 9773 | BIOCARTA_IL2RB_PATHWAY                                     | 0.84 | 0.15 | 0 | 0 | 0 | not significant |
| 9774 | CHR17Q23                                                   | 0.84 | 0.15 | 0 | 0 | 0 | not significant |
| 9775 | DARWICHE_PAPILLOMA_PROGRESSION_RISK                        | 0.84 | 0.15 | 0 | 0 | 0 | not significant |
| 9776 | GO_LAMELLIPODIUM_MEMBRANE                                  | 0.84 | 0.15 | 0 | 0 | 0 | not significant |
| 9777 | GO_POLYOL_BIOSYNTHETIC_PROCESS                             | 0.84 | 0.15 | 0 | 0 | 0 | not significant |
| 9778 | GO_POLYUBIQUITIN_MODIFICATION_DEPENDENT_PROTEIN_BINDING    | 0.84 | 0.15 | 0 | 0 | 0 | not significant |
| 9779 | DAVICIONI_PAX_FOXO1_SIGNATURE_IN_ARMS_UP                   | 0.84 | 0.14 | 0 | 0 | 0 | not significant |
| 9780 | GO_EMBRYONIC_HEART_TUBE_DEVELOPMENT                        | 0.84 | 0.14 | 0 | 0 | 0 | not significant |
| 9781 | GO_PROTEIN_K48_LINKED_UBIQUITINATION                       | 0.84 | 0.14 | 0 | 0 | 0 | not significant |
| 9782 | GO_REGULATION_OF_T_CELL_MEDIATED_CYTOTOXICITY              | 0.84 | 0.14 | 0 | 0 | 0 | not significant |
| 9783 | HOLLERN_SQUAMOUS_BREAST_TUMOR                              | 0.84 | 0.14 | 0 | 0 | 0 | not significant |
| 9784 | PID_NFKAPPAB_CANONICAL_PATHWAY                             | 0.84 | 0.14 | 0 | 0 | 0 | not significant |
| 9785 | PRAMOONJAGO_SOX4_TARGETS_UP                                | 0.84 | 0.14 | 0 | 0 | 0 | not significant |
| 9786 | GO_REGULATION_OF_SYNAPTIC_PLASTICITY                       | 0.84 | 0.13 | 0 | 0 | 0 | not significant |
| 9787 | GO_RESPONSE_TO_ETHANOL                                     | 0.84 | 0.13 | 0 | 0 | 0 | not significant |
| 9788 | KEGG_ADHERENS_JUNCTION                                     | 0.84 | 0.13 | 0 | 0 | 0 | not significant |
| 9789 | PLASARI_TGFB1_SIGNALING_VIA_NFIC_1HR_DN                    | 0.84 | 0.13 | 0 | 0 | 0 | not significant |
| 9790 | FALVELLA_SMOKERS_WITH_LUNG_CANCER                          | 0.84 | 0.12 | 0 | 0 | 0 | not significant |
| 9791 | GO_MOTILE_CILIUM                                           | 0.84 | 0.12 | 0 | 0 | 0 | not significant |
| 9792 | GO_NUCLEAR_DNA_REPLICATION                                 | 0.84 | 0.12 | 0 | 0 | 0 | not significant |
| 9793 | GO_NEGATIVE_REGULATION_OF_LEUKOCYTE_CELL_CELL_ADHESION     | 0.84 | 0.11 | 0 | 0 | 0 | not significant |
| 9794 | GO_SECONDARY_ACTIVE_TRANSMEMBRANE_TRANSPORTER_ACTIVITY     | 0.84 | 0.11 | 0 | 0 | 0 | not significant |
| 9795 | REACTOME_CARGO_RECOGNITION_FOR_CLATHRIN_MEDIATED_ENDOC'    | 0.84 | 0.11 | 0 | 0 | 0 | not significant |
| 9796 | GO_ERBB_SIGNALING_PATHWAY                                  | 0.84 | 0.10 | 0 | 0 | 0 | not significant |
| 9797 | RB_DNV1_UP                                                 | 0.84 | 0.10 | 0 | 0 | 0 | not significant |
| 9798 | CAIRO_HEPATOBLASTOMA_UP                                    | 0.84 | 0.08 | 0 | 0 | 0 | not significant |

|      |                                                           |      |      |   |   |   |                 |
|------|-----------------------------------------------------------|------|------|---|---|---|-----------------|
| 9799 | GO_ANION_TRANSMEMBRANE_TRANSPORT                          | 0.84 | 0.08 | 0 | 0 | 0 | not significant |
| 9800 | GO_CILIUM_ORGANIZATION                                    | 0.84 | 0.07 | 0 | 0 | 0 | not significant |
| 9801 | GO_POSITIVE_REGULATION_OF_LOCOMOTION                      | 0.84 | 0.07 | 0 | 0 | 0 | not significant |
| 9802 | DACOSTA_UV_RESPONSE_VIA_ERCC3_UP                          | 0.84 | 0.06 | 0 | 0 | 0 | not significant |
| 9803 | GO_ORGANELLE_SUBCOMPARTMENT                               | 0.84 | 0.06 | 0 | 0 | 0 | not significant |
| 9804 | GO_REGULATION_OF_CELL_MORPHOGENESIS                       | 0.84 | 0.06 | 0 | 0 | 0 | not significant |
| 9805 | GO_SMALL_GTPASE_MEDIATED_SIGNAL_TRANSDUCTION              | 0.84 | 0.04 | 0 | 0 | 0 | not significant |
| 9806 | GO_SYNAPSE                                                | 0.84 | 0.02 | 0 | 0 | 0 | not significant |
| 9807 | NYTTEN_NIP1_TARGETS_DN                                    | 0.84 | 0.02 | 0 | 0 | 0 | not significant |
| 9808 | GO_NON_MEMBRANE_SPANNING_PROTEIN_TYROSINE_PHOSPHATASE_A   | 0.85 | 0.20 | 0 | 0 | 0 | not significant |
| 9809 | ZEMBTUSU_SENSITIVITY_TO_MITOMYCIN                         | 0.85 | 0.20 | 0 | 0 | 0 | not significant |
| 9810 | GO_CELLULAR_POTASSIUM_ION_HOMEOSTASIS                     | 0.85 | 0.19 | 0 | 0 | 0 | not significant |
| 9811 | GO_EXTRACELLULAR_VESICLE_BIOGENESIS                       | 0.85 | 0.19 | 0 | 0 | 0 | not significant |
| 9812 | GO_LOW_DENSITY_LIPOPROTEIN_PARTICLE                       | 0.85 | 0.19 | 0 | 0 | 0 | not significant |
| 9813 | GO_NEGATIVE_REGULATION_OF_CYTOPLASMIC_TRANSLATION         | 0.85 | 0.19 | 0 | 0 | 0 | not significant |
| 9814 | GO_NEGATIVE_REGULATION_OF_ENDOPLASMIC_RETICULUM_UNFOLDED  | 0.85 | 0.19 | 0 | 0 | 0 | not significant |
| 9815 | GO_POSITIVE_REGULATION_OF_NEURAL_PRECURSOR_CELL_PROLIFER  | 0.85 | 0.19 | 0 | 0 | 0 | not significant |
| 9816 | GO_TELOMERE_MAINTENANCE_IN_RESPONSE_TO_DNA_DAMAGE         | 0.85 | 0.19 | 0 | 0 | 0 | not significant |
| 9817 | GO_TRANSMEMBRANE_RECEPTOR_PROTEIN_PHOSPHATASE_ACTIVITY    | 0.85 | 0.19 | 0 | 0 | 0 | not significant |
| 9818 | GO_VENOUS_BLOOD_VESSEL_MORPHOGENESIS                      | 0.85 | 0.19 | 0 | 0 | 0 | not significant |
| 9819 | REACTOME_APEX1_INDEPENDENT_RESOLUTION_OF_AP_SITES_VIA_THE | 0.85 | 0.19 | 0 | 0 | 0 | not significant |
| 9820 | VANLOO_SP3_TARGETS_UP                                     | 0.85 | 0.19 | 0 | 0 | 0 | not significant |
| 9821 | BCAT_100_UP.V1_DN                                         | 0.85 | 0.18 | 0 | 0 | 0 | not significant |
| 9822 | GO_ACTIN_CORTICAL_PATCH_LOCALIZATION                      | 0.85 | 0.18 | 0 | 0 | 0 | not significant |
| 9823 | GO_DEVELOPMENT_OF_SECONDARY_SEXUAL_CHARACTERISTICS        | 0.85 | 0.18 | 0 | 0 | 0 | not significant |
| 9824 | GO_PHOSPHORUS_OXYGEN_LYASE_ACTIVITY                       | 0.85 | 0.18 | 0 | 0 | 0 | not significant |
| 9825 | GO_POSITIVE_REGULATION_OF_HEAT_GENERATION                 | 0.85 | 0.18 | 0 | 0 | 0 | not significant |
| 9826 | GO_PROTEIN_PHOSPHATASE_2A_BINDING                         | 0.85 | 0.18 | 0 | 0 | 0 | not significant |
| 9827 | GO_PYRIMIDINE_NUCLEOSIDE_METABOLIC_PROCESS                | 0.85 | 0.18 | 0 | 0 | 0 | not significant |
| 9828 | GO_REGULATION_OF_T_CELL_TOLERANCE_INDUCION                | 0.85 | 0.18 | 0 | 0 | 0 | not significant |
| 9829 | GO_UDP_N_ACETYLGALUCOSAMINE_BIOSYNTHETIC_PROCESS          | 0.85 | 0.18 | 0 | 0 | 0 | not significant |
| 9830 | HOEGERKORP_CD44_TARGETS_TEMPORAL_UP                       | 0.85 | 0.18 | 0 | 0 | 0 | not significant |
| 9831 | REACTOME_O_GLYCOSYLATION_OF_TSR_DOMAIN_CONTAINING_PROTE   | 0.85 | 0.18 | 0 | 0 | 0 | not significant |
| 9832 | BIOCARTA GRANULOCYTES_PATHWAY                             | 0.85 | 0.17 | 0 | 0 | 0 | not significant |
| 9833 | DELACROIX_RAR_TARGETS_UP                                  | 0.85 | 0.17 | 0 | 0 | 0 | not significant |
| 9834 | GO_CALCIIUM_ACTIVATED_CATION_CHANNEL_ACTIVITY             | 0.85 | 0.17 | 0 | 0 | 0 | not significant |
| 9835 | GO_CELLULAR_RESPONSE_TO_SODIUM_ARSENITE                   | 0.85 | 0.17 | 0 | 0 | 0 | not significant |
| 9836 | GO_METALLOENDOPEPTIDASE_INHIBITOR_ACTIVITY                | 0.85 | 0.17 | 0 | 0 | 0 | not significant |
| 9837 | GO_POSITIVE_REGULATION_OF_AXON_EXTENSION                  | 0.85 | 0.17 | 0 | 0 | 0 | not significant |
| 9838 | GO_POSITIVE_REGULATION_OF_ENDOTHELIAL_CELL_CHEMOTAXIS     | 0.85 | 0.17 | 0 | 0 | 0 | not significant |
| 9839 | GO_POSITIVE_REGULATION_OF_LONG_TERM_SYNAPTIC_POTENTIATION | 0.85 | 0.17 | 0 | 0 | 0 | not significant |
| 9840 | GO_POSITIVE_REGULATION_OF_PEPTIDYL_LYSINE_ACETYLATION     | 0.85 | 0.17 | 0 | 0 | 0 | not significant |
| 9841 | GO_REGULATION_OF_BILE_ACID_BIOSYNTHETIC_PROCESS           | 0.85 | 0.17 | 0 | 0 | 0 | not significant |
| 9842 | GO_RNA_SECONDARY_STRUCTURE_UNWINDING                      | 0.85 | 0.17 | 0 | 0 | 0 | not significant |
| 9843 | KEGG_O_GLYCAN_BIOSYNTHESIS                                | 0.85 | 0.17 | 0 | 0 | 0 | not significant |
| 9844 | OKAMOTO_LIVER_CANCER_MULTICENTRIC_OCCURRENCE_UP           | 0.85 | 0.17 | 0 | 0 | 0 | not significant |
| 9845 | REACTOME_ACTIVATION_OF_THE_PRE_REPLICATIVE_COMPLEX        | 0.85 | 0.17 | 0 | 0 | 0 | not significant |
| 9846 | REACTOME_ENDOGENOUS_STEROLS                               | 0.85 | 0.17 | 0 | 0 | 0 | not significant |
| 9847 | REACTOME_HYALURONAN_METABOLISM                            | 0.85 | 0.17 | 0 | 0 | 0 | not significant |
| 9848 | REACTOME_NEUROTRANSMITTER_RELEASE_CYCLE                   | 0.85 | 0.17 | 0 | 0 | 0 | not significant |
| 9849 | CHARADONNA_NEOPLASTIC_TRANSFORMATION_KRAS_CDC25_UP        | 0.85 | 0.16 | 0 | 0 | 0 | not significant |
| 9850 | GO_REGULATION_OF_DENDRITIC_SPINE_MORPHOGENESIS            | 0.85 | 0.16 | 0 | 0 | 0 | not significant |
| 9851 | MMS_MOUSE_LYMPH_HIGH_4HRS_UP                              | 0.85 | 0.16 | 0 | 0 | 0 | not significant |
| 9852 | SEKI_INFLAMMATORY_RESPONSE_LPS_UP                         | 0.85 | 0.16 | 0 | 0 | 0 | not significant |
| 9853 | CHR16Q21                                                  | 0.85 | 0.15 | 0 | 0 | 0 | not significant |
| 9854 | DUAN_PRDM5_TARGETS                                        | 0.85 | 0.15 | 0 | 0 | 0 | not significant |
| 9855 | GO_NEGATIVE_REGULATION_OF_G_PROTEIN_COUPLED_RECEPTOR_SII  | 0.85 | 0.15 | 0 | 0 | 0 | not significant |
| 9856 | GO_PROTEIN_SERINE_THREONINE_TYROSINE_KINASE_ACTIVITY      | 0.85 | 0.15 | 0 | 0 | 0 | not significant |
| 9857 | GO_SMOOTH_MUSCLE_CELL_DIFFERENTIATION                     | 0.85 | 0.15 | 0 | 0 | 0 | not significant |
| 9858 | GO_SOMITOGENESIS                                          | 0.85 | 0.15 | 0 | 0 | 0 | not significant |
| 9859 | PID_HDAC_CLASSII_PATHWAY                                  | 0.85 | 0.15 | 0 | 0 | 0 | not significant |
| 9860 | GO_INTRINSIC_COMPONENT_OF_POSTSYNAPTIC_MEMBRANE           | 0.85 | 0.14 | 0 | 0 | 0 | not significant |
| 9861 | GO_MICROTUBULE_POLYMERIZATION                             | 0.85 | 0.14 | 0 | 0 | 0 | not significant |
| 9862 | GO_POSITIVE_REGULATION_OF_DNA_REPAIR                      | 0.85 | 0.14 | 0 | 0 | 0 | not significant |
| 9863 | BERTUCCI_MEDULLARY_VS_DUCTAL_BREAST_CANCER_DN             | 0.85 | 0.13 | 0 | 0 | 0 | not significant |
| 9864 | GO_CILIARY_BASAL_BODY                                     | 0.85 | 0.13 | 0 | 0 | 0 | not significant |
| 9865 | KIM_GASTRIC_CANCER_CHEMOSENSITIVITY                       | 0.85 | 0.13 | 0 | 0 | 0 | not significant |
| 9866 | HALLMARK_UV_RESPONSE_DN                                   | 0.85 | 0.12 | 0 | 0 | 0 | not significant |
| 9867 | DCA_UP.V1_DN                                              | 0.85 | 0.11 | 0 | 0 | 0 | not significant |
| 9868 | GO_ENDOPLASMIC_RETICULUM_UNFOLDED_PROTEIN_RESPONSE        | 0.85 | 0.11 | 0 | 0 | 0 | not significant |
| 9869 | MULLIGHAN_NPM1_SIGNATURE_3_DN                             | 0.85 | 0.10 | 0 | 0 | 0 | not significant |
| 9870 | CHR17P13                                                  | 0.85 | 0.09 | 0 | 0 | 0 | not significant |
| 9871 | GO_ACTIVATION_OF_PROTEIN_KINASE_ACTIVITY                  | 0.85 | 0.09 | 0 | 0 | 0 | not significant |
| 9872 | GO_PROTEIN_AUTOPHOSPHORYLATION                            | 0.85 | 0.09 | 0 | 0 | 0 | not significant |
| 9873 | GO_POSITIVE_REGULATION_OF_NEURON_DIFFERENTIATION          | 0.85 | 0.08 | 0 | 0 | 0 | not significant |
| 9874 | GO_TUBULIN_BINDING                                        | 0.85 | 0.08 | 0 | 0 | 0 | not significant |
| 9875 | GO_KINASE_ACTIVITY                                        | 0.85 | 0.04 | 0 | 0 | 0 | not significant |
| 9876 | GO_PHARYNGEAL_SYSTEM_DEVELOPMENT                          | 0.86 | 0.20 | 0 | 0 | 0 | not significant |
| 9877 | GO_PROTEIN_KINASE_C_ACTIVITY                              | 0.86 | 0.20 | 0 | 0 | 0 | not significant |
| 9878 | GO_QUATERNARY_AMMONIUM_GROUP_BINDING                      | 0.86 | 0.20 | 0 | 0 | 0 | not significant |
| 9879 | GO_REGULATION_OF_CILIUM_BEAT_FREQUENCY                    | 0.86 | 0.20 | 0 | 0 | 0 | not significant |
| 9880 | GO_REGULATION_OF_CILIUM_MOVEMENT                          | 0.86 | 0.20 | 0 | 0 | 0 | not significant |
| 9881 | GO_RESPONSE_TO_HYDROXYUREA                                | 0.86 | 0.20 | 0 | 0 | 0 | not significant |
| 9882 | GO_SEMINIFEROUS_TUBULE_DEVELOPMENT                        | 0.86 | 0.20 | 0 | 0 | 0 | not significant |
| 9883 | NEWMAN_ERCC6_TARGETS_DN                                   | 0.86 | 0.20 | 0 | 0 | 0 | not significant |
| 9884 | RADAIEVA_RESPONSE_TO_IFN1_DN                              | 0.86 | 0.20 | 0 | 0 | 0 | not significant |
| 9885 | REACTOME_TNFR1_MEDIATED_CERAMIDE_PRODUCTION               | 0.86 | 0.20 | 0 | 0 | 0 | not significant |
| 9886 | GO_ALPHA_DNA_POLYMERASE_PRIMASE_COMPLEX                   | 0.86 | 0.19 | 0 | 0 | 0 | not significant |
| 9887 | GO_ARF_PROTEIN_SIGNAL_TRANSDUCTION                        | 0.86 | 0.19 | 0 | 0 | 0 | not significant |
| 9888 | GO_CELL_PROLIFERATION_IN_HINDBRAIN                        | 0.86 | 0.19 | 0 | 0 | 0 | not significant |
| 9889 | GO_JUN_KINASE_BINDING                                     | 0.86 | 0.19 | 0 | 0 | 0 | not significant |
| 9890 | GO_MULTIVESICULAR_BODY_MEMBRANE                           | 0.86 | 0.19 | 0 | 0 | 0 | not significant |
| 9891 | GO_NEGATIVE_REGULATION_OF_ALPHA_BETA_T_CELL_ACTIVATION    | 0.86 | 0.19 | 0 | 0 | 0 | not significant |
| 9892 | GO_NEGATIVE_REGULATION_OF_RECEPTOR_BINDING                | 0.86 | 0.19 | 0 | 0 | 0 | not significant |
| 9893 | GO_REGULATION_OF_ANION_TRANSMEMBRANE_TRANSPORT            | 0.86 | 0.19 | 0 | 0 | 0 | not significant |
| 9894 | GO_REGULATION_OF_CELLULAR_RESPONSE_TO_VASCULAR_ENDOTHE    | 0.86 | 0.19 | 0 | 0 | 0 | not significant |
| 9895 | GO_REGULATION_OF_DNA_DEMETHYLATION                        | 0.86 | 0.19 | 0 | 0 | 0 | not significant |
| 9896 | GO_REGULATION_OF_HIPPO_SIGNALING                          | 0.86 | 0.19 | 0 | 0 | 0 | not significant |
| 9897 | GO_REGULATION_OF_HISTONE_PHOSPHORYLATION                  | 0.86 | 0.19 | 0 | 0 | 0 | not significant |
| 9898 | GO_T_CELL_ACTIVATION_VIA_T_CELL_RECEPTOR_CONTACT_WITH_AN  | 0.86 | 0.19 | 0 | 0 | 0 | not significant |
| 9899 | REACTOME_COLLAGEN_DEGRADATION                             | 0.86 | 0.19 | 0 | 0 | 0 | not significant |
| 9900 | REACTOME_FCFR1_MEDIATED_CAPLUS2_MOBILIZATION              | 0.86 | 0.19 | 0 | 0 | 0 | not significant |
| 9901 | VETTER_TARGETS_OF_PRKCA_AND_ETS1_DN                       | 0.86 | 0.19 | 0 | 0 | 0 | not significant |
| 9902 | BALDWIN_PRKCI_TARGETS_UP                                  | 0.86 | 0.18 | 0 | 0 | 0 | not significant |
| 9903 | BIOCARTA_MET_PATHWAY                                      | 0.86 | 0.18 | 0 | 0 | 0 | not significant |
| 9904 | CHR3Q22                                                   | 0.86 | 0.18 | 0 | 0 | 0 | not significant |
| 9905 | GO_BRAIN_MORPHOGENESIS                                    | 0.86 | 0.18 | 0 | 0 | 0 | not significant |
| 9906 | GO_CYCLOOXYGENASE_PATHWAY                                 | 0.86 | 0.18 | 0 | 0 | 0 | not significant |
| 9907 | GO_ERBB2_SIGNALING_PATHWAY                                | 0.86 | 0.18 | 0 | 0 | 0 | not significant |

|       |                                                            |      |      |   |   |   |                 |
|-------|------------------------------------------------------------|------|------|---|---|---|-----------------|
| 9908  | GO_GOLGI_TRANS_CISTERNA                                    | 0.86 | 0.18 | 0 | 0 | 0 | not significant |
| 9909  | GO_HEXOSAMINIDASE_ACTIVITY                                 | 0.86 | 0.18 | 0 | 0 | 0 | not significant |
| 9910  | GO_MRNA_TRANSCRIPTION                                      | 0.86 | 0.18 | 0 | 0 | 0 | not significant |
| 9911  | PID_ADISS_2PATHWAY                                         | 0.86 | 0.18 | 0 | 0 | 0 | not significant |
| 9912  | REACTOME_REGULATED_PROTEOLYSIS_OF_P75NTR                   | 0.86 | 0.18 | 0 | 0 | 0 | not significant |
| 9913  | REACTOME_TRANSPORT_OF_VITAMINS_NUCLEOSIDES_AND_RELATED_I   | 0.86 | 0.18 | 0 | 0 | 0 | not significant |
| 9914  | GO_ANTIPORTER_ACTIVITY                                     | 0.86 | 0.17 | 0 | 0 | 0 | not significant |
| 9915  | GO_AXIS_SPECIFICATION                                      | 0.86 | 0.17 | 0 | 0 | 0 | not significant |
| 9916  | GO_NUCLEOSIDE_KINASE_ACTIVITY                              | 0.86 | 0.17 | 0 | 0 | 0 | not significant |
| 9917  | GO_POSITIVE_REGULATION_OF_PROTEIN_ACETYLTATION             | 0.86 | 0.17 | 0 | 0 | 0 | not significant |
| 9918  | GO_REGULATION_OF_CHROMATIN_BINDING                         | 0.86 | 0.17 | 0 | 0 | 0 | not significant |
| 9919  | REACTOME_ACTIVATED_TAK1_MEDIATES_P38_MAPK_ACTIVATION       | 0.86 | 0.17 | 0 | 0 | 0 | not significant |
| 9920  | REACTOME_REGULATION_OF_GENE_EXPRESSION_IN_BETA_CELLS       | 0.86 | 0.17 | 0 | 0 | 0 | not significant |
| 9921  | TAKEDA_TARGETS_OF_NUP98_HOXA9_FUSION_6HR_DN                | 0.86 | 0.17 | 0 | 0 | 0 | not significant |
| 9922  | CHR2Q14                                                    | 0.86 | 0.16 | 0 | 0 | 0 | not significant |
| 9923  | GO_LIPOPOLYSACCHARIDE_MEDIATED_SIGNALING_PATHWAY           | 0.86 | 0.16 | 0 | 0 | 0 | not significant |
| 9924  | GO_REGULATION_OF_PHAGOCYTOSIS                              | 0.86 | 0.16 | 0 | 0 | 0 | not significant |
| 9925  | KRAS_AMP_LUNG_UP.V1_UP                                     | 0.86 | 0.16 | 0 | 0 | 0 | not significant |
| 9926  | SHEDDEN_LUNG_CANCER_GOOD_SURVIVAL_A5                       | 0.86 | 0.16 | 0 | 0 | 0 | not significant |
| 9927  | CHIBA_RESPONSE_TO_TSA_UP                                   | 0.86 | 0.15 | 0 | 0 | 0 | not significant |
| 9928  | GAL_LEUKEMIC_STEM_CELL_UP                                  | 0.86 | 0.15 | 0 | 0 | 0 | not significant |
| 9929  | GO_PROTEIN_AUTOUBIQUITINATION                              | 0.86 | 0.15 | 0 | 0 | 0 | not significant |
| 9930  | NIELSEN_GIST                                               | 0.86 | 0.15 | 0 | 0 | 0 | not significant |
| 9931  | RAGHAVACHARI_PLATELET_SPECIFIC_GENES                       | 0.86 | 0.15 | 0 | 0 | 0 | not significant |
| 9932  | CHR14Q32                                                   | 0.86 | 0.14 | 0 | 0 | 0 | not significant |
| 9933  | COULOUARN_TEMPORAL_TGFB1_SIGNATURE_DN                      | 0.86 | 0.14 | 0 | 0 | 0 | not significant |
| 9934  | GO_REGULATION_OF_REACTIVE_OXYGEN_SPECIES_BIOSYNTHETIC_PR   | 0.86 | 0.14 | 0 | 0 | 0 | not significant |
| 9935  | GO_SERINE_THREONINE_PROTEIN_KINASE_COMPLEX                 | 0.86 | 0.14 | 0 | 0 | 0 | not significant |
| 9936  | NATSUME_RESPONSE_TO_INTERFERON_BETA_UP                     | 0.86 | 0.14 | 0 | 0 | 0 | not significant |
| 9937  | GO_CENTRAL_NERVOUS_SYSTEM_NEURON_DIFFERENTIATION           | 0.86 | 0.13 | 0 | 0 | 0 | not significant |
| 9938  | GO_REGULATION_OF_PEPTIDE_HORMONE_SECRETION                 | 0.86 | 0.13 | 0 | 0 | 0 | not significant |
| 9939  | RODWELL_AGING_KIDNEY_DN                                    | 0.86 | 0.13 | 0 | 0 | 0 | not significant |
| 9940  | GO_INTRINSIC_COMPONENT_OF_ENDOPLASMIC_RETICULUM_MEMBRANE   | 0.86 | 0.12 | 0 | 0 | 0 | not significant |
| 9941  | GO_POSITIVE_REGULATION_OF_PROTEIN_KINASE_B_SIGNALING       | 0.86 | 0.12 | 0 | 0 | 0 | not significant |
| 9942  | PRC2_EED_UP.V1_DN                                          | 0.86 | 0.12 | 0 | 0 | 0 | not significant |
| 9943  | VERHAAK_AML_WITH_NPM1_MUTATED_UP                           | 0.86 | 0.12 | 0 | 0 | 0 | not significant |
| 9944  | BRUINS_UVC_RESPONSE_VIA_TP53_GROUP_D                       | 0.86 | 0.11 | 0 | 0 | 0 | not significant |
| 9945  | GO_DEVELOPMENT_OF_PRIMARY_SEXUAL_CHARACTERISTICS           | 0.86 | 0.11 | 0 | 0 | 0 | not significant |
| 9946  | GO_REGULATION_OF_CELLULAR_RESPONSE_TO_GROWTH_FACTOR_S      | 0.86 | 0.11 | 0 | 0 | 0 | not significant |
| 9947  | KASLER_HDAC7_TARGETS_1_UP                                  | 0.86 | 0.10 | 0 | 0 | 0 | not significant |
| 9948  | GO_REGULATION_OF_INTRACELLULAR_PROTEIN_TRANSPORT           | 0.86 | 0.09 | 0 | 0 | 0 | not significant |
| 9949  | PEDERSEN_METASTASIS_BY_ERBB2_ISOFORM_7                     | 0.86 | 0.07 | 0 | 0 | 0 | not significant |
| 9950  | MIKKELSEN_ES_ICP_WITH_H3K4ME3                              | 0.86 | 0.06 | 0 | 0 | 0 | not significant |
| 9951  | GO_SOMATODENDRITIC_COMPARTMENT                             | 0.86 | 0.05 | 0 | 0 | 0 | not significant |
| 9952  | GO_C_TERMINAL_PROTEIN_LIPIDATION                           | 0.87 | 0.22 | 0 | 0 | 0 | not significant |
| 9953  | GO_CYTOKINE_SECRETION_INVOLVED_IN_IMMUNE_RESPONSE          | 0.87 | 0.22 | 0 | 0 | 0 | not significant |
| 9954  | FERRANDO_TAL1_NEIGHBORS                                    | 0.87 | 0.21 | 0 | 0 | 0 | not significant |
| 9955  | GO_CHRONIC_INFLAMMATORY_RESPONSE                           | 0.87 | 0.21 | 0 | 0 | 0 | not significant |
| 9956  | GO_HISTONE_H4_K20_METHYLATION                              | 0.87 | 0.21 | 0 | 0 | 0 | not significant |
| 9957  | GO_INHIBITORY_POSTSYNAPTIC_POTENTIAL                       | 0.87 | 0.21 | 0 | 0 | 0 | not significant |
| 9958  | GO_MATURE_B_CELL_DIFFERENTIATION                           | 0.87 | 0.21 | 0 | 0 | 0 | not significant |
| 9959  | GO_MATURE_B_CELL_DIFFERENTIATION_INVOLVED_IN_IMMUNE_RESP   | 0.87 | 0.21 | 0 | 0 | 0 | not significant |
| 9960  | GO_MICROTUBULE_SEVERING_ATPASE_ACTIVITY                    | 0.87 | 0.21 | 0 | 0 | 0 | not significant |
| 9961  | GO_NEGATIVE_REGULATION_OF_POTASSIUM_ION_TRANSMEMBRANE_T    | 0.87 | 0.21 | 0 | 0 | 0 | not significant |
| 9962  | PARK_TRETINOLIN_RESPONSE                                   | 0.87 | 0.21 | 0 | 0 | 0 | not significant |
| 9963  | GENTLES_LEUKEMIC_STEM_CELL_UP                              | 0.87 | 0.20 | 0 | 0 | 0 | not significant |
| 9964  | GO_CYCLOSPORIN_A_BINDING                                   | 0.87 | 0.20 | 0 | 0 | 0 | not significant |
| 9965  | GO_FLUID_TRANSPORT                                         | 0.87 | 0.20 | 0 | 0 | 0 | not significant |
| 9966  | GO_LYMPHOID_PROGENITOR_CELL_DIFFERENTIATION                | 0.87 | 0.20 | 0 | 0 | 0 | not significant |
| 9967  | GO_NEURAL_TUBE_PATTERNING                                  | 0.87 | 0.20 | 0 | 0 | 0 | not significant |
| 9968  | GO_PHOSPHATIDYLINOSITOL_PHOSPHATE_5_PHOSPHATASE_ACTIVITY   | 0.87 | 0.20 | 0 | 0 | 0 | not significant |
| 9969  | GO_POSITIVE_REGULATION_OF_GLIAL_CELL_PROLIFERATION         | 0.87 | 0.20 | 0 | 0 | 0 | not significant |
| 9970  | GO_PRIMARY_MIRNA_BINDING                                   | 0.87 | 0.20 | 0 | 0 | 0 | not significant |
| 9971  | GO_SCHWANN_CELL_PROLIFERATION                              | 0.87 | 0.20 | 0 | 0 | 0 | not significant |
| 9972  | GO_SMOOTHENED_SIGNALING_PATHWAY_INVOLVED_IN_DORSAL_VENT    | 0.87 | 0.20 | 0 | 0 | 0 | not significant |
| 9973  | REACTOME_BIOSYNTHESIS_OF_SPECIALIZED_PRORESOLVING_MEDIAT   | 0.87 | 0.20 | 0 | 0 | 0 | not significant |
| 9974  | REACTOME_CLASS_B_2_SECRETIN_FAMILY_RECEPTORS               | 0.87 | 0.20 | 0 | 0 | 0 | not significant |
| 9975  | REACTOME_FORMATION_OF_THE_CORNIFIED_ENVELOPE               | 0.87 | 0.20 | 0 | 0 | 0 | not significant |
| 9976  | REACTOME_SYNTHESIS_OF_PROSTAGLANDINS_PG_AND_THROMBOXAN     | 0.87 | 0.20 | 0 | 0 | 0 | not significant |
| 9977  | RIZ_ERYTHROID_DIFFERENTIATION_6HR                          | 0.87 | 0.20 | 0 | 0 | 0 | not significant |
| 9978  | YAMANAKA_GLIOMASTOMA_SURVIVAL_DN                           | 0.87 | 0.20 | 0 | 0 | 0 | not significant |
| 9979  | BANDRES_RESPONSE_TO_CARMUSTIN_MGMT_48HR_UP                 | 0.87 | 0.19 | 0 | 0 | 0 | not significant |
| 9980  | BIOCARTA_PRC2_PATHWAY                                      | 0.87 | 0.19 | 0 | 0 | 0 | not significant |
| 9981  | CHR16Q12                                                   | 0.87 | 0.19 | 0 | 0 | 0 | not significant |
| 9982  | FOURNIER_ACINAR_DEVELOPMENT_LATE_UP                        | 0.87 | 0.19 | 0 | 0 | 0 | not significant |
| 9983  | GALLUZZI_PREVENT_MITOCHONDRIAL_PERMEABILIZATION            | 0.87 | 0.19 | 0 | 0 | 0 | not significant |
| 9984  | GO_DNA_POLYMERASE_BINDING                                  | 0.87 | 0.19 | 0 | 0 | 0 | not significant |
| 9985  | GO_ENDOTHELIAL_CELL_MORPHOGENESIS                          | 0.87 | 0.19 | 0 | 0 | 0 | not significant |
| 9986  | GO_ISG15_PROTEIN_CONJUGATION                               | 0.87 | 0.19 | 0 | 0 | 0 | not significant |
| 9987  | GO_NUCLEOBASE_TRANSPORT                                    | 0.87 | 0.19 | 0 | 0 | 0 | not significant |
| 9988  | GO_POSITIVE_REGULATION_OF_MESONEPHROS_DEVELOPMENT          | 0.87 | 0.19 | 0 | 0 | 0 | not significant |
| 9989  | GO_POSITIVE_REGULATION_OF_STEM_CELL_PROLIFERATION          | 0.87 | 0.19 | 0 | 0 | 0 | not significant |
| 9990  | GO_PRR19_COMPLEX                                           | 0.87 | 0.19 | 0 | 0 | 0 | not significant |
| 9991  | GO_REGULATION_OF_ACTIVIN_RECEPTOR_SIGNALING_PATHWAY        | 0.87 | 0.19 | 0 | 0 | 0 | not significant |
| 9992  | GO_REGULATION_OF_INTRINSIC_APOPTOTIC_SIGNALING_PATHWAY_IN  | 0.87 | 0.19 | 0 | 0 | 0 | not significant |
| 9993  | REACTOME_INHIBITION_OF_REPLICATION_INITIATION_OF_DAMAGED_D | 0.87 | 0.19 | 0 | 0 | 0 | not significant |
| 9994  | REACTOME_KERATINIZATION                                    | 0.87 | 0.19 | 0 | 0 | 0 | not significant |
| 9995  | WANG_RESPONSE_TO_BEXAROTENE_UP                             | 0.87 | 0.19 | 0 | 0 | 0 | not significant |
| 9996  | FIGUEROA_AML_METHYLATION_CLUSTER_2_UP                      | 0.87 | 0.18 | 0 | 0 | 0 | not significant |
| 9997  | FRIDMAN_SENESCENCE_UP                                      | 0.87 | 0.18 | 0 | 0 | 0 | not significant |
| 9998  | GO_PHAGOSOME_ACIDIFICATION                                 | 0.87 | 0.18 | 0 | 0 | 0 | not significant |
| 9999  | GO_POSTSYNAPTIC_SPECIALIZATION_INTRACELLULAR_COMPONENT     | 0.87 | 0.18 | 0 | 0 | 0 | not significant |
| 10000 | GO_REGULATION_OF_RAC_PROTEIN_SIGNAL_TRANSDUCTION           | 0.87 | 0.18 | 0 | 0 | 0 | not significant |
| 10001 | HEIDENBLAD_AMPLICON_8Q24_DN                                | 0.87 | 0.18 | 0 | 0 | 0 | not significant |
| 10002 | NAGASHIMA_NRG1_SIGNALING_DN                                | 0.87 | 0.18 | 0 | 0 | 0 | not significant |
| 10003 | ONO_FOXP3_TARGETS_DN                                       | 0.87 | 0.18 | 0 | 0 | 0 | not significant |
| 10004 | PID_P38_MKK3_6PATHWAY                                      | 0.87 | 0.18 | 0 | 0 | 0 | not significant |
| 10005 | REACTOME_CARGO_TRAFFICKING_TO_THE_PERICILIARY_MEMBRANE     | 0.87 | 0.18 | 0 | 0 | 0 | not significant |
| 10006 | REACTOME_HDMS_DEMETHYLATE_HISTONES                         | 0.87 | 0.18 | 0 | 0 | 0 | not significant |
| 10007 | GO_CENTRIOLAR_SATELLITE                                    | 0.87 | 0.17 | 0 | 0 | 0 | not significant |
| 10008 | GO_NATURAL_KILLER_CELL_MEDIATED_IMMUNITY                   | 0.87 | 0.17 | 0 | 0 | 0 | not significant |
| 10009 | GO_POSITIVE_REGULATION_OF_PROTEIN_TYROSINE_KINASE_ACTIVITY | 0.87 | 0.17 | 0 | 0 | 0 | not significant |
| 10010 | GO_CENTROSOME_DUPLICATION                                  | 0.87 | 0.16 | 0 | 0 | 0 | not significant |
| 10011 | GO_REGULATION_OF_SYNAPTIC_VESICLE_CYCLE                    | 0.87 | 0.16 | 0 | 0 | 0 | not significant |
| 10012 | GO_RNA_POLYMERASE_II_CORE_PROMOTER_SEQUENCE_SPECIFIC_DN    | 0.87 | 0.16 | 0 | 0 | 0 | not significant |
| 10013 | LIU_PROSTATE_CANCER_UP                                     | 0.87 | 0.16 | 0 | 0 | 0 | not significant |
| 10014 | DELASERNA_MYOD_TARGETS_UP                                  | 0.87 | 0.15 | 0 | 0 | 0 | not significant |
| 10015 | GO_ANTERIOR_POSTERIOR_PATTERN_SPECIFICATION                | 0.87 | 0.15 | 0 | 0 | 0 | not significant |
| 10016 | GO_NEGATIVE_REGULATION_OF_TRANSMEMBRANE_RECEPTOR_PROTE     | 0.87 | 0.15 | 0 | 0 | 0 | not significant |

|       |                                                             |      |      |   |   |   |                 |
|-------|-------------------------------------------------------------|------|------|---|---|---|-----------------|
| 10017 | GO_OSTEOCLAST_DIFFERENTIATION                               | 0.87 | 0.15 | 0 | 0 | 0 | not significant |
| 10018 | REACTOME_CELL_SURFACE_INTERACTIONS_AT_THE_VASCULAR_WALL     | 0.87 | 0.15 | 0 | 0 | 0 | not significant |
| 10019 | GO_NEGATIVE_REGULATION_OF_CELLULAR_RESPONSE_TO_GROWTH       | 0.87 | 0.14 | 0 | 0 | 0 | not significant |
| 10020 | PID_PDGFBRB_PATHWAY                                         | 0.87 | 0.14 | 0 | 0 | 0 | not significant |
| 10021 | RAPA_EARLY_UP.V1_DN                                         | 0.87 | 0.14 | 0 | 0 | 0 | not significant |
| 10022 | REACTOME_SIGNALING_BY_NOTCH1                                | 0.87 | 0.14 | 0 | 0 | 0 | not significant |
| 10023 | GO_EPITHELIAL_CELL_DEVELOPMENT                              | 0.87 | 0.13 | 0 | 0 | 0 | not significant |
| 10024 | GO_EXTRINSIC_COMPONENT_OF_MEMBRANE                          | 0.87 | 0.12 | 0 | 0 | 0 | not significant |
| 10025 | GO_PHOSPHATIDYLINOSITOL_BINDING                             | 0.87 | 0.12 | 0 | 0 | 0 | not significant |
| 10026 | PDGF_ERK_DN.V1_DN                                           | 0.87 | 0.12 | 0 | 0 | 0 | not significant |
| 10027 | BOYLAN_MULTIPLE_MYELOMA_C_D_DN                              | 0.87 | 0.11 | 0 | 0 | 0 | not significant |
| 10028 | CHEMNITZ_RESPONSE_TO_PROSTAGLANDIN_E2_DN                    | 0.87 | 0.11 | 0 | 0 | 0 | not significant |
| 10029 | GO_HORMONE_TRANSPORT                                        | 0.87 | 0.11 | 0 | 0 | 0 | not significant |
| 10030 | GO_IN_UTERO_EMBRYONIC_DEVELOPMENT                           | 0.87 | 0.10 | 0 | 0 | 0 | not significant |
| 10031 | GO_POSITIVE_REGULATION_OF_PROTEIN_SERINE_THREONINE_KINASE   | 0.87 | 0.10 | 0 | 0 | 0 | not significant |
| 10032 | GO_UBIQUITIN_LIKE_PROTEIN_LIGASE_ACTIVITY                   | 0.87 | 0.10 | 0 | 0 | 0 | not significant |
| 10033 | RUTELLA_RESPONSE_TO_HGF_VS_CSF2RB_AND_IL4_DN                | 0.87 | 0.10 | 0 | 0 | 0 | not significant |
| 10034 | GO_POSITIVE_REGULATION_OF_CELLULAR_PROTEIN_LOCALIZATION     | 0.87 | 0.09 | 0 | 0 | 0 | not significant |
| 10035 | GO_UBIQUITIN_LIKE_PROTEIN_TRANSFERASE_ACTIVITY              | 0.87 | 0.08 | 0 | 0 | 0 | not significant |
| 10036 | GO_CHROMATIN_BINDING                                        | 0.87 | 0.07 | 0 | 0 | 0 | not significant |
| 10037 | GO_ENDOTHELIAL_CELL_ACTIVATION                              | 0.88 | 0.22 | 0 | 0 | 0 | not significant |
| 10038 | GO_LABYRINTHINE_LAYER_MORPHOGENESIS                         | 0.88 | 0.22 | 0 | 0 | 0 | not significant |
| 10039 | GO_REGULATION_OF_LIGASE_ACTIVITY                            | 0.88 | 0.22 | 0 | 0 | 0 | not significant |
| 10040 | GO_UDP_XYLOSYLTRANSFERASE_ACTIVITY                          | 0.88 | 0.22 | 0 | 0 | 0 | not significant |
| 10041 | BIOCARTA_TERT_PATHWAY                                       | 0.88 | 0.21 | 0 | 0 | 0 | not significant |
| 10042 | BREUHAIN_GROWTH_FACTOR_SIGNALING_IN_LIVER_CANCER            | 0.88 | 0.21 | 0 | 0 | 0 | not significant |
| 10043 | GO_7SK_SNRNA_BINDING                                        | 0.88 | 0.21 | 0 | 0 | 0 | not significant |
| 10044 | GO_ATPASE_ACTIVITY_COUPLED_TO_TRANSMEMBRANE_MOVEMENT_O      | 0.88 | 0.21 | 0 | 0 | 0 | not significant |
| 10045 | GO_AXON_ENSHEATHMENT_IN_CENTRAL_NERVOUS_SYSTEM              | 0.88 | 0.21 | 0 | 0 | 0 | not significant |
| 10046 | GO_EMBRYONIC_FORELIMB_MORPHOGENESIS                         | 0.88 | 0.21 | 0 | 0 | 0 | not significant |
| 10047 | GO_EXCITATORY_SYNAPSE_ASSEMBLY                              | 0.88 | 0.21 | 0 | 0 | 0 | not significant |
| 10048 | GO_NEGATIVE_REGULATION_OF_B_CELL_APOPTOTIC_PROCESS          | 0.88 | 0.21 | 0 | 0 | 0 | not significant |
| 10049 | GO_NEGATIVE_REGULATION_OF_CELL_ADHESION_MEDIATED_BY_INTEC   | 0.88 | 0.21 | 0 | 0 | 0 | not significant |
| 10050 | GO_NEGATIVE_REGULATION_OF_CHROMATIN_SILENCING               | 0.88 | 0.21 | 0 | 0 | 0 | not significant |
| 10051 | GO_POSITIVE_REGULATION_OF_PROTEIN_LOCALIZATION_TO_CENTROS   | 0.88 | 0.21 | 0 | 0 | 0 | not significant |
| 10052 | GO_PRE_B_CELL_DIFFERENTIATION                               | 0.88 | 0.21 | 0 | 0 | 0 | not significant |
| 10053 | GO_REGULATION_OF_CHROMATIN_ASSEMBLY_OR_DISASSEMBLY          | 0.88 | 0.21 | 0 | 0 | 0 | not significant |
| 10054 | GO_REGULATION_OF_SPINDLE_CHECKPOINT                         | 0.88 | 0.21 | 0 | 0 | 0 | not significant |
| 10055 | GO_SUMO_LIGASE_ACTIVITY                                     | 0.88 | 0.21 | 0 | 0 | 0 | not significant |
| 10056 | GRAHAM_CML_QUIESCENT_VS_CML_DIVIDING_UP                     | 0.88 | 0.21 | 0 | 0 | 0 | not significant |
| 10057 | GUTIERREZ_CHRONIC_LYMPHOCYTIC_LEUKEMIA_UP                   | 0.88 | 0.21 | 0 | 0 | 0 | not significant |
| 10058 | KEGG_NICOTINATE_AND_NICOTINAMIDE_METABOLISM                 | 0.88 | 0.21 | 0 | 0 | 0 | not significant |
| 10059 | MARKS_HDAC_TARGETS_UP                                       | 0.88 | 0.21 | 0 | 0 | 0 | not significant |
| 10060 | REACTOME_BH3_ONLY_PROTEINS_ASSOCIATE_WITH_AND_INACTIVATE    | 0.88 | 0.21 | 0 | 0 | 0 | not significant |
| 10061 | CHR6Q23                                                     | 0.88 | 0.20 | 0 | 0 | 0 | not significant |
| 10062 | GO_DEVELOPMENT_OF_SECONDARY_FEMALE_SEXUAL_CHARACTERIST      | 0.88 | 0.20 | 0 | 0 | 0 | not significant |
| 10063 | GO_MONOOXYGENASE_ACTIVITY                                   | 0.88 | 0.20 | 0 | 0 | 0 | not significant |
| 10064 | GO_POSITIVE_REGULATION_OF_DOUBLE_STRAND_BREAK_REPAIR        | 0.88 | 0.20 | 0 | 0 | 0 | not significant |
| 10065 | GO_POSITIVE_REGULATION_OF_T_CELL_MEDIATED_CYTOTOXICITY      | 0.88 | 0.20 | 0 | 0 | 0 | not significant |
| 10066 | GO_PROTECTION_FROM_NON_HOMOLOGOUS_END_JOINING_AT_TELOM      | 0.88 | 0.20 | 0 | 0 | 0 | not significant |
| 10067 | GO_PROTON_TRANSPORTING_ATPASE_ACTIVITY_ROTATIONAL_MECHAI    | 0.88 | 0.20 | 0 | 0 | 0 | not significant |
| 10068 | GO_REGULATION_OF_LIPOPOLYSACCHARIDE_MEDIATED_SIGNALING_P#   | 0.88 | 0.20 | 0 | 0 | 0 | not significant |
| 10069 | GO_REGULATION_OF_RESPIRATORY_GASEOUS_EXCHANGE               | 0.88 | 0.20 | 0 | 0 | 0 | not significant |
| 10070 | REACTOME_ASSOCIATION_OF_TRIC_CCT_WITH_TARGET_PROTEINS_DL    | 0.88 | 0.20 | 0 | 0 | 0 | not significant |
| 10071 | BIOCARTA_TNFR2_PATHWAY                                      | 0.88 | 0.19 | 0 | 0 | 0 | not significant |
| 10072 | GO_CLATHRIN_DEPENDENT_ENDOCYTOSIS                           | 0.88 | 0.19 | 0 | 0 | 0 | not significant |
| 10073 | GO_DIAPEDESIS                                               | 0.88 | 0.19 | 0 | 0 | 0 | not significant |
| 10074 | GO_GAMMA_CATENIN_BINDING                                    | 0.88 | 0.19 | 0 | 0 | 0 | not significant |
| 10075 | GO_PHOSPHATIDYLCHOLINE_TRANSPORTER_ACTIVITY                 | 0.88 | 0.19 | 0 | 0 | 0 | not significant |
| 10076 | GO_POSITIVE_REGULATION_OF_T_CELL_DIFFERENTIATION_IN_THYMUS  | 0.88 | 0.19 | 0 | 0 | 0 | not significant |
| 10077 | GO_PROTEIN_POLYUFIYMLATION                                  | 0.88 | 0.19 | 0 | 0 | 0 | not significant |
| 10078 | GO_REGULATION_OF_CILUM_ASSEMBLY                             | 0.88 | 0.19 | 0 | 0 | 0 | not significant |
| 10079 | GO_REGULATION_OF_RECEPTOR_INTERNALIZATION                   | 0.88 | 0.19 | 0 | 0 | 0 | not significant |
| 10080 | GO_SMOOTH_MUSCLE_CONTRACTION                                | 0.88 | 0.19 | 0 | 0 | 0 | not significant |
| 10081 | GO_XENOBIOTIC_TRANSPORT                                     | 0.88 | 0.19 | 0 | 0 | 0 | not significant |
| 10082 | KAMMINGA_SENESCENCE                                         | 0.88 | 0.19 | 0 | 0 | 0 | not significant |
| 10083 | PID_TNF_PATHWAY                                             | 0.88 | 0.19 | 0 | 0 | 0 | not significant |
| 10084 | PIONTEK_PKD1_TARGETS_DN                                     | 0.88 | 0.19 | 0 | 0 | 0 | not significant |
| 10085 | REACTOME_DEACTIVATION_OF_THE_BETA_CATENIN_TRANSCRIPTIVATING | 0.88 | 0.19 | 0 | 0 | 0 | not significant |
| 10086 | REACTOME_O_LINKED_GLYCOSYLATION                             | 0.88 | 0.19 | 0 | 0 | 0 | not significant |
| 10087 | ROVERSI_GLIOMA_COPY_NUMBER_UP                               | 0.88 | 0.19 | 0 | 0 | 0 | not significant |
| 10088 | BACOLOD_RESISTANCE_TO_ALKYLATING_AGENTS_DN                  | 0.88 | 0.18 | 0 | 0 | 0 | not significant |
| 10089 | GEORGANTAS_HSC_MARKERS                                      | 0.88 | 0.18 | 0 | 0 | 0 | not significant |
| 10090 | GO_LUMENAL_SIDE_OF_MEMBRANE                                 | 0.88 | 0.18 | 0 | 0 | 0 | not significant |
| 10091 | GO_POSITIVE_REGULATION_OF_NUCLEAR_DIVISION                  | 0.88 | 0.18 | 0 | 0 | 0 | not significant |
| 10092 | GO_PROTEIN_K48_LINKED_DEUBIQUITINATION                      | 0.88 | 0.18 | 0 | 0 | 0 | not significant |
| 10093 | GO_REGULATION_OF_LEUKOCYTE_CHEMOTAXIS                       | 0.88 | 0.18 | 0 | 0 | 0 | not significant |
| 10094 | DIRMEIER_LMP1_RESPONSE_EARLY                                | 0.88 | 0.17 | 0 | 0 | 0 | not significant |
| 10095 | GO_METALLOEXOPEPTIDASE_ACTIVITY                             | 0.88 | 0.17 | 0 | 0 | 0 | not significant |
| 10096 | KATSANOJ_ELAVL1_TARGETS_UP                                  | 0.88 | 0.17 | 0 | 0 | 0 | not significant |
| 10097 | WAMUNYOKOLI_OVARIAN_CANCER_GRADES_1_2_DN                    | 0.88 | 0.17 | 0 | 0 | 0 | not significant |
| 10098 | EIF4E_DN                                                    | 0.88 | 0.16 | 0 | 0 | 0 | not significant |
| 10099 | GO_ACTION_POTENTIAL                                         | 0.88 | 0.16 | 0 | 0 | 0 | not significant |
| 10100 | GO_ANCHORED_COMPONENT_OF_MEMBRANE                           | 0.88 | 0.16 | 0 | 0 | 0 | not significant |
| 10101 | GO_ENDOSOME_ORGANIZATION                                    | 0.88 | 0.16 | 0 | 0 | 0 | not significant |
| 10102 | LIU_VMVB_TARGETS_UP                                         | 0.88 | 0.16 | 0 | 0 | 0 | not significant |
| 10103 | MCBRYAN_PUBERTAL_BREAST_5_6WK_UP                            | 0.88 | 0.16 | 0 | 0 | 0 | not significant |
| 10104 | GO_POSITIVE_REGULATION_OF_CELL_MORPHOGENESIS_INVOLVED_IN    | 0.88 | 0.15 | 0 | 0 | 0 | not significant |
| 10105 | GO_SENSORY_PERCEPTION_OF_LIGHT_STIMULUS                     | 0.88 | 0.15 | 0 | 0 | 0 | not significant |
| 10106 | GO_TRANSFORMING_GROWTH_FACTOR_BETA_RECEPTOR_SIGNALING       | 0.88 | 0.15 | 0 | 0 | 0 | not significant |
| 10107 | MCBRYAN_PUBERTAL_BREAST_5_6WK_DN                            | 0.88 | 0.15 | 0 | 0 | 0 | not significant |
| 10108 | GO_HINDBRAIN_DEVELOPMENT                                    | 0.88 | 0.14 | 0 | 0 | 0 | not significant |
| 10109 | GO_MUSCLE_CELL_PROLIFERATION                                | 0.88 | 0.13 | 0 | 0 | 0 | not significant |
| 10110 | GO_REGULATION_OF_RESPONSE_TO_DNA_DAMAGE_STIMULUS            | 0.88 | 0.13 | 0 | 0 | 0 | not significant |
| 10111 | GO_DNA_BINDING_TRANSCRIPTION_ACTIVATOR_ACTIVITY             | 0.88 | 0.12 | 0 | 0 | 0 | not significant |
| 10112 | GO_AXON                                                     | 0.88 | 0.10 | 0 | 0 | 0 | not significant |
| 10113 | GO_CELL_PART_MORPHOGENESIS                                  | 0.88 | 0.09 | 0 | 0 | 0 | not significant |
| 10114 | GO_VESICLE_MEMBRANE                                         | 0.88 | 0.09 | 0 | 0 | 0 | not significant |
| 10115 | GO_NERVOUS_SYSTEM_PROCESS                                   | 0.88 | 0.08 | 0 | 0 | 0 | not significant |
| 10116 | MILI_PSEUDOPODIA_CHEMOTAXIS_DN                              | 0.88 | 0.08 | 0 | 0 | 0 | not significant |
| 10117 | BENPORATH_SOX2_TARGETS                                      | 0.88 | 0.07 | 0 | 0 | 0 | not significant |
| 10118 | GO_ZINC_ION_BINDING                                         | 0.88 | 0.07 | 0 | 0 | 0 | not significant |
| 10119 | KRIEG_HYPOXIA_NOT_VIA_KDM3A                                 | 0.88 | 0.07 | 0 | 0 | 0 | not significant |
| 10120 | ODONNELL_METASTASIS_DN                                      | 0.89 | 0.24 | 0 | 0 | 0 | not significant |
| 10121 | GO_CELLULAR_ANION_HOMEOSTASIS                               | 0.89 | 0.23 | 0 | 0 | 0 | not significant |
| 10122 | GO_NEGATIVE_REGULATION_OF_LYMPHOCYTE_MIGRATION              | 0.89 | 0.23 | 0 | 0 | 0 | not significant |
| 10123 | GO_REGULATION_OF_RECEPTOR_BINDING                           | 0.89 | 0.23 | 0 | 0 | 0 | not significant |
| 10124 | GO_SLEEP                                                    | 0.89 | 0.23 | 0 | 0 | 0 | not significant |
| 10125 | KEGG_GLYCOSAMINOGLYCAN_BIOSYNTHESIS_KERATAN_SULFATE         | 0.89 | 0.23 | 0 | 0 | 0 | not significant |

|       |                                                            |      |      |   |   |   |                 |
|-------|------------------------------------------------------------|------|------|---|---|---|-----------------|
| 10126 | REACTOME_TRANSCRIPTIONAL_REGULATION_OF_PLURIPOTENT_STEM    | 0.89 | 0.23 | 0 | 0 | 0 | not significant |
| 10127 | DISTECHE_ESCAPED_FROM_X_INACTIVATION                       | 0.89 | 0.22 | 0 | 0 | 0 | not significant |
| 10128 | GO_DNA_CATABOLIC_PROCESS_EXONUCLEOLYTIC                    | 0.89 | 0.22 | 0 | 0 | 0 | not significant |
| 10129 | GO_HETEROPHILIC_CELL_CELL_ADHESION_VIA_PLASMA_MEMBRANE_CI  | 0.89 | 0.22 | 0 | 0 | 0 | not significant |
| 10130 | GO_INTERLEUKIN_2_BIOSYNTHETIC_PROCESS                      | 0.89 | 0.22 | 0 | 0 | 0 | not significant |
| 10131 | GO_ORIGIN_RECOGNITION_COMPLEX                              | 0.89 | 0.22 | 0 | 0 | 0 | not significant |
| 10132 | GO_PHOSPHATIDYLINOSITOL_4_5_BISPHOSPHATE_5_PHOSPHATASE_AC  | 0.89 | 0.22 | 0 | 0 | 0 | not significant |
| 10133 | GO_POSITIVE_REGULATION_OF_CHROMATIN_BINDING                | 0.89 | 0.22 | 0 | 0 | 0 | not significant |
| 10134 | GO_POSITIVE_REGULATION_OF_HISTONE_H3_K9_ACETYLATION        | 0.89 | 0.22 | 0 | 0 | 0 | not significant |
| 10135 | GO_REGULATION_OF_ARP2_3_COMPLEX_MEDIATED_ACTIN_NUCLEATIO   | 0.89 | 0.22 | 0 | 0 | 0 | not significant |
| 10136 | GO_REGULATION_OF_AUTOPHAGY_OF_MITOCHONDRION_IN_RESPONSE    | 0.89 | 0.22 | 0 | 0 | 0 | not significant |
| 10137 | SAKAI_TUMOR_INFILTRATING_MONOCYTES_UP                      | 0.89 | 0.22 | 0 | 0 | 0 | not significant |
| 10138 | BURTON_ADIPOGENESIS_9                                      | 0.89 | 0.21 | 0 | 0 | 0 | not significant |
| 10139 | CHR8Q22                                                    | 0.89 | 0.21 | 0 | 0 | 0 | not significant |
| 10140 | GO_GLYCOSYLPHOSPHATIDYLINOSITOL_N_ACETYLGALUCOSAMINYLTRA   | 0.89 | 0.21 | 0 | 0 | 0 | not significant |
| 10141 | GO_RENAL_SYSTEM_PROCESS_INVOLVED_IN_REGULATION_OF_SYSTEI   | 0.89 | 0.21 | 0 | 0 | 0 | not significant |
| 10142 | GO_SEGMENT_SPECIFICATION                                   | 0.89 | 0.21 | 0 | 0 | 0 | not significant |
| 10143 | GO_UNCONVENTIONAL_MYOSIN_COMPLEX                           | 0.89 | 0.21 | 0 | 0 | 0 | not significant |
| 10144 | KEGG_HEDGEHOG_SIGNALING_PATHWAY                            | 0.89 | 0.21 | 0 | 0 | 0 | not significant |
| 10145 | PAL_PRMT5_TARGETS_DN                                       | 0.89 | 0.21 | 0 | 0 | 0 | not significant |
| 10146 | PARK_TRETINOLIN_RESPONSE_AND_RARA_PLZF_FUSION              | 0.89 | 0.21 | 0 | 0 | 0 | not significant |
| 10147 | REACTOME_PLASMA_LIPOPROTEIN_REMODELING                     | 0.89 | 0.21 | 0 | 0 | 0 | not significant |
| 10148 | SHIN_B_CELL_LYMPHOMA_CLUSTER_8                             | 0.89 | 0.21 | 0 | 0 | 0 | not significant |
| 10149 | ZHAN_MULTIPLE_MYELOMA_MS_DN                                | 0.89 | 0.21 | 0 | 0 | 0 | not significant |
| 10150 | BIOCARTA_DC_PATHWAY                                        | 0.89 | 0.20 | 0 | 0 | 0 | not significant |
| 10151 | FIRESTEIN_CTNB1_PATHWAY                                    | 0.89 | 0.20 | 0 | 0 | 0 | not significant |
| 10152 | GO_CARBOHYDRATE_DERIVATIVE_TRANSMEMBRANE_TRANSPORTER_A     | 0.89 | 0.20 | 0 | 0 | 0 | not significant |
| 10153 | GO_GALACTOSIDASE_ACTIVITY                                  | 0.89 | 0.20 | 0 | 0 | 0 | not significant |
| 10154 | GO_NEGATIVE_REGULATION_OF_COLD_INDUCED_THERMOGENESIS       | 0.89 | 0.20 | 0 | 0 | 0 | not significant |
| 10155 | GO_POLYSACCHARIDE_METABOLIC_PROCESS                        | 0.89 | 0.20 | 0 | 0 | 0 | not significant |
| 10156 | GO_POSITIVE_REGULATION_OF_CIRCADIAN_RHYTHM                 | 0.89 | 0.20 | 0 | 0 | 0 | not significant |
| 10157 | GO_PRESYNAPTIC_ACTIVE_ZONE                                 | 0.89 | 0.20 | 0 | 0 | 0 | not significant |
| 10158 | GO_REGULATION_OF_MEMBRANE_TUBULATION                       | 0.89 | 0.20 | 0 | 0 | 0 | not significant |
| 10159 | GO_RETINAL_ROD_CELL_DEVELOPMENT                            | 0.89 | 0.20 | 0 | 0 | 0 | not significant |
| 10160 | REACTOME_NOTCH3_ACTIVATION_AND_TRANSMISSION_OF_SIGNAL_TO   | 0.89 | 0.20 | 0 | 0 | 0 | not significant |
| 10161 | REACTOME_SUMOYLATION_OF_TRANSCRIPTION_COFACTORS            | 0.89 | 0.20 | 0 | 0 | 0 | not significant |
| 10162 | VANHARANTA_UTERINE_FIBROID_WITH_7Q_DELETION_DN             | 0.89 | 0.20 | 0 | 0 | 0 | not significant |
| 10163 | ZEMBUSU_SENSITIVITY_TO_CISPLATIN                           | 0.89 | 0.20 | 0 | 0 | 0 | not significant |
| 10164 | BILD_SRC_ONCOGENIC_SIGNATURE                               | 0.89 | 0.19 | 0 | 0 | 0 | not significant |
| 10165 | CHUNG_BLISTER_CYTOTOXICITY_DN                              | 0.89 | 0.19 | 0 | 0 | 0 | not significant |
| 10166 | GO_CILIARY_MEMBRANE                                        | 0.89 | 0.19 | 0 | 0 | 0 | not significant |
| 10167 | GO_KINASE_INHIBITOR_ACTIVITY                               | 0.89 | 0.19 | 0 | 0 | 0 | not significant |
| 10168 | GO_NUCLEOBASE_CONTAINING_COMPOUND_TRANSMEMBRANE_TRANSF     | 0.89 | 0.19 | 0 | 0 | 0 | not significant |
| 10169 | GO_O_GLYCAN_PROCESSING                                     | 0.89 | 0.19 | 0 | 0 | 0 | not significant |
| 10170 | GO_PLACENTA_DEVELOPMENT                                    | 0.89 | 0.19 | 0 | 0 | 0 | not significant |
| 10171 | HALLMARK_TGF_BETA_SIGNALING                                | 0.89 | 0.19 | 0 | 0 | 0 | not significant |
| 10172 | KEGG_HYPERTROPHIC_CARDIOMYOPATHY_HCM                       | 0.89 | 0.19 | 0 | 0 | 0 | not significant |
| 10173 | RIGGINS_TAMOXIFEN_RESISTANCE_UP                            | 0.89 | 0.19 | 0 | 0 | 0 | not significant |
| 10174 | GO_AUTOPHAGY_OF_MITOCHONDRION                              | 0.89 | 0.18 | 0 | 0 | 0 | not significant |
| 10175 | GO_REGULATION_OF_CELLULAR_RESPONSE_TO_TRANSFORMING_GRC     | 0.89 | 0.18 | 0 | 0 | 0 | not significant |
| 10176 | POOLA_INVASIVE_BREAST_CANCER_DN                            | 0.89 | 0.18 | 0 | 0 | 0 | not significant |
| 10177 | GO_ACTIVATION_OF_MAPK_ACTIVITY                             | 0.89 | 0.17 | 0 | 0 | 0 | not significant |
| 10178 | GO_ERYTHROCYTE_HOMEOSTASIS                                 | 0.89 | 0.17 | 0 | 0 | 0 | not significant |
| 10179 | GO_NEGATIVE_REGULATION_OF_CELL_CELL_ADHESION               | 0.89 | 0.17 | 0 | 0 | 0 | not significant |
| 10180 | GO_NEURON_PROJECTION_EXTENSION                             | 0.89 | 0.17 | 0 | 0 | 0 | not significant |
| 10181 | GO_NOTCH_SIGNALING_PATHWAY                                 | 0.89 | 0.17 | 0 | 0 | 0 | not significant |
| 10182 | GO_REGULATION_OF_LIPASE_ACTIVITY                           | 0.89 | 0.17 | 0 | 0 | 0 | not significant |
| 10183 | GREGORY_SYNTHETIC_LETHAL_WITH_IMATINIB                     | 0.89 | 0.16 | 0 | 0 | 0 | not significant |
| 10184 | YAGI_AML_WITH_T_9_11_TRANSLOCATION                         | 0.89 | 0.16 | 0 | 0 | 0 | not significant |
| 10185 | GO_MITOTIC_CELL_CYCLE_CHECKPOINT                           | 0.89 | 0.14 | 0 | 0 | 0 | not significant |
| 10186 | MONNER_POSTRADIATION_TUMOR_ESCAPE_DN                       | 0.89 | 0.10 | 0 | 0 | 0 | not significant |
| 10187 | GO_REGULATION_OF_NERVOUS_SYSTEM_DEVELOPMENT                | 0.89 | 0.08 | 0 | 0 | 0 | not significant |
| 10188 | MARKS_HDAC_TARGETS_DN                                      | 0.90 | 0.25 | 0 | 0 | 0 | not significant |
| 10189 | GO_FOREBRAIN_MORPHOGENESIS                                 | 0.90 | 0.24 | 0 | 0 | 0 | not significant |
| 10190 | GO_THROMBIN_ACTIVATED_RECEPTOR_SIGNALING_PATHWAY           | 0.90 | 0.24 | 0 | 0 | 0 | not significant |
| 10191 | NOJIMA_SFRP2_TARGETS_DN                                    | 0.90 | 0.24 | 0 | 0 | 0 | not significant |
| 10192 | REACTOME_NF_KB_IS_ACTIVATED_AND_SIGNALS_SURVIVAL           | 0.90 | 0.24 | 0 | 0 | 0 | not significant |
| 10193 | GO_INOSITOL_TRISPHOSPHATE_BIOSYNTHETIC_PROCESS             | 0.90 | 0.23 | 0 | 0 | 0 | not significant |
| 10194 | GO_MICROTUBULE_MINUS_END                                   | 0.90 | 0.23 | 0 | 0 | 0 | not significant |
| 10195 | GO_PEPIDYL_SERINE_DEPHOSPHORYLATION                        | 0.90 | 0.23 | 0 | 0 | 0 | not significant |
| 10196 | GO_PHAGOPHORE_ASSEMBLY_SITE_MEMBRANE                       | 0.90 | 0.23 | 0 | 0 | 0 | not significant |
| 10197 | GO_POSITIVE_REGULATION_OF_GLYCOPROTEIN_BIOSYNTHETIC_PROCI  | 0.90 | 0.23 | 0 | 0 | 0 | not significant |
| 10198 | GO_REGULATION_OF_ACTIN_FILAMENT_BASED_MOVEMENT             | 0.90 | 0.23 | 0 | 0 | 0 | not significant |
| 10199 | GO_TORC2_SIGNALING                                         | 0.90 | 0.23 | 0 | 0 | 0 | not significant |
| 10200 | GO_TRANSEPIHELIAL_TRANSPORT                                | 0.90 | 0.23 | 0 | 0 | 0 | not significant |
| 10201 | GO_VOLTAGE_GATED_ANION_CHANNEL_ACTIVITY                    | 0.90 | 0.23 | 0 | 0 | 0 | not significant |
| 10202 | HASINA_NOL7_TARGETS_UP                                     | 0.90 | 0.23 | 0 | 0 | 0 | not significant |
| 10203 | MCGOWAN_RSP6_TARGETS_UP                                    | 0.90 | 0.23 | 0 | 0 | 0 | not significant |
| 10204 | WANG_TNF_TARGETS                                           | 0.90 | 0.23 | 0 | 0 | 0 | not significant |
| 10205 | BIOCARTA_GABA_PATHWAY                                      | 0.90 | 0.22 | 0 | 0 | 0 | not significant |
| 10206 | GO_ATP_DEPENDENT_PROTEIN_BINDING                           | 0.90 | 0.22 | 0 | 0 | 0 | not significant |
| 10207 | GO_BONE_RESORPTION                                         | 0.90 | 0.22 | 0 | 0 | 0 | not significant |
| 10208 | GO_CILIUM_MOVEMENT_INVOLVED_IN_CELL_MOTILITY               | 0.90 | 0.22 | 0 | 0 | 0 | not significant |
| 10209 | GO_FRIZZLED_BINDING                                        | 0.90 | 0.22 | 0 | 0 | 0 | not significant |
| 10210 | GO_MUSCLE_ATROPHY                                          | 0.90 | 0.22 | 0 | 0 | 0 | not significant |
| 10211 | GO_NOTCH_RECEPTOR_PROCESSING_LIGAND_DEPENDENT              | 0.90 | 0.22 | 0 | 0 | 0 | not significant |
| 10212 | GO_NUCLEOTIDE_EXCISION_REPAIR_COMPLEX                      | 0.90 | 0.22 | 0 | 0 | 0 | not significant |
| 10213 | GO_RELAXATION_OF_CARDIAC_MUSCLE                            | 0.90 | 0.22 | 0 | 0 | 0 | not significant |
| 10214 | GO_RESPONSE_TO_COBALT_ION                                  | 0.90 | 0.22 | 0 | 0 | 0 | not significant |
| 10215 | GO_STEM_CELL_DIVISION                                      | 0.90 | 0.22 | 0 | 0 | 0 | not significant |
| 10216 | GO_SYNAPTIC_GROWTH_AT_NEUROMUSCULAR_JUNCTION               | 0.90 | 0.22 | 0 | 0 | 0 | not significant |
| 10217 | HALLMARK_HEDGEHOG_SIGNALING                                | 0.90 | 0.22 | 0 | 0 | 0 | not significant |
| 10218 | HUI_MAPK14_TARGETS_UP                                      | 0.90 | 0.22 | 0 | 0 | 0 | not significant |
| 10219 | WANG_METASTASIS_OF_BREAST_CANCER                           | 0.90 | 0.22 | 0 | 0 | 0 | not significant |
| 10220 | BERTUCCI_INVASIVE_CARCINOMA_DUCTAL_VS_LOBULAR_UP           | 0.90 | 0.21 | 0 | 0 | 0 | not significant |
| 10221 | GO_EXCRETION                                               | 0.90 | 0.21 | 0 | 0 | 0 | not significant |
| 10222 | GO_FORMATION_OF_PRIMARY_GERM_LAYER                         | 0.90 | 0.21 | 0 | 0 | 0 | not significant |
| 10223 | GO_IMMUNOLOGICAL_SYNAPSE                                   | 0.90 | 0.21 | 0 | 0 | 0 | not significant |
| 10224 | GO_NEGATIVE_REGULATION_OF_INTERLEUKIN_1_BETA_PRODUCTION    | 0.90 | 0.21 | 0 | 0 | 0 | not significant |
| 10225 | GO_POSITIVE_REGULATION_OF_CYSSTEINE_TYPE_ENDOPEPTIDASE_ACT | 0.90 | 0.21 | 0 | 0 | 0 | not significant |
| 10226 | GO_PURINE_NUCLEOSIDE_MONOPHOSPHATE_BIOSYNTHETIC_PROCESS    | 0.90 | 0.21 | 0 | 0 | 0 | not significant |
| 10227 | GO_REGULATION_OF_LYMPHOID_PROGENITOR_CELL_DIFFERENTIATIOI  | 0.90 | 0.21 | 0 | 0 | 0 | not significant |
| 10228 | GO_RESPONSE_TO_INTERLEUKIN_4                               | 0.90 | 0.21 | 0 | 0 | 0 | not significant |
| 10229 | LUI_THYROID_CANCER_PAX8_PPARG_UP                           | 0.90 | 0.21 | 0 | 0 | 0 | not significant |
| 10230 | REACTOME_ACTIVATION_OF_THE_TFAP2_AP_2_FAMILY_OF_TRANSCRIF  | 0.90 | 0.21 | 0 | 0 | 0 | not significant |
| 10231 | REACTOME_CELL_CELL_COMMUNICATION                           | 0.90 | 0.21 | 0 | 0 | 0 | not significant |
| 10232 | REACTOME_SHC_MEDIATED_CASCADE_FGFR1                        | 0.90 | 0.21 | 0 | 0 | 0 | not significant |
| 10233 | REACTOME_TNFR1_INDUCED_NFKAPPAB_SIGNALING_PATHWAY          | 0.90 | 0.21 | 0 | 0 | 0 | not significant |
| 10234 | SCIBETTA_KDM6B_TARGETS_UP                                  | 0.90 | 0.21 | 0 | 0 | 0 | not significant |

|       |                                                           |      |      |   |   |   |                 |
|-------|-----------------------------------------------------------|------|------|---|---|---|-----------------|
| 10235 | WESTON_VEGFA_TARGETS                                      | 0.90 | 0.21 | 0 | 0 | 0 | not significant |
| 10236 | GO_BETA_TUBULIN_BINDING                                   | 0.90 | 0.20 | 0 | 0 | 0 | not significant |
| 10237 | GO_MEIOTIC_CHROMOSOME_SEGREGATION                         | 0.90 | 0.20 | 0 | 0 | 0 | not significant |
| 10238 | GO_REGULATION_OF_MYELOID_LEUKOCYTE_DIFFERENTIATION        | 0.90 | 0.20 | 0 | 0 | 0 | not significant |
| 10239 | GO_RRNA_BINDING                                           | 0.90 | 0.20 | 0 | 0 | 0 | not significant |
| 10240 | GO_SYNAPTONEMAL_STRUCTURE                                 | 0.90 | 0.20 | 0 | 0 | 0 | not significant |
| 10241 | HENDRICKS_SMARCA4_TARGETS_UP                              | 0.90 | 0.20 | 0 | 0 | 0 | not significant |
| 10242 | REACTOME_REGULATION_OF_PTEN_GENE_TRANSCRIPTION            | 0.90 | 0.20 | 0 | 0 | 0 | not significant |
| 10243 | GO_RESPONSE_TO_ACTIVITY                                   | 0.90 | 0.19 | 0 | 0 | 0 | not significant |
| 10244 | KEGG_SMALL_CELL_LUNG_CANCER                               | 0.90 | 0.19 | 0 | 0 | 0 | not significant |
| 10245 | KEGG_WNT_SIGNALING_PATHWAY                                | 0.90 | 0.19 | 0 | 0 | 0 | not significant |
| 10246 | XU_HGF_TARGETS_REPRESSED_BY_AKT1_DN                       | 0.90 | 0.19 | 0 | 0 | 0 | not significant |
| 10247 | GO_PEPTIDYL_LYSINE_METHYLATION                            | 0.90 | 0.18 | 0 | 0 | 0 | not significant |
| 10248 | GO_REGULATION_OF_CELL_SIZE                                | 0.90 | 0.18 | 0 | 0 | 0 | not significant |
| 10249 | GO_REGULATION_OF_PH                                       | 0.90 | 0.18 | 0 | 0 | 0 | not significant |
| 10250 | SANSOM_APC_TARGETS_UP                                     | 0.90 | 0.18 | 0 | 0 | 0 | not significant |
| 10251 | GO_MAMMARY_GLAND_DEVELOPMENT                              | 0.90 | 0.17 | 0 | 0 | 0 | not significant |
| 10252 | GO_REGULATION_OF_MYELOID_CELL_DIFFERENTIATION             | 0.90 | 0.17 | 0 | 0 | 0 | not significant |
| 10253 | KYNG_DNA_DAMAGE_UP                                        | 0.90 | 0.17 | 0 | 0 | 0 | not significant |
| 10254 | PECE_MAMMARY_STEM_CELL_DN                                 | 0.90 | 0.17 | 0 | 0 | 0 | not significant |
| 10255 | BROWNE_HCMV_INFECTION_4HR_DN                              | 0.90 | 0.16 | 0 | 0 | 0 | not significant |
| 10256 | GO_DNA_INTEGRITY_CHECKPOINT                               | 0.90 | 0.16 | 0 | 0 | 0 | not significant |
| 10257 | GO_POSITIVE_REGULATION_OF_INTRACELLULAR_TRANSPORT         | 0.90 | 0.16 | 0 | 0 | 0 | not significant |
| 10258 | GO_RESPONSE_TO_UV                                         | 0.90 | 0.16 | 0 | 0 | 0 | not significant |
| 10259 | GO_POSITIVE_REGULATION_OF_NEURON_PROJECTION_DEVELOPMENT   | 0.90 | 0.15 | 0 | 0 | 0 | not significant |
| 10260 | SCHAEFFER_PROSTATE_DEVELOPMENT_48HR_UP                    | 0.90 | 0.15 | 0 | 0 | 0 | not significant |
| 10261 | GO_REGULATION_OF_PROTEIN_COMPLEX_ASSEMBLY                 | 0.90 | 0.14 | 0 | 0 | 0 | not significant |
| 10262 | GO_SENSORY_ORGAN_DEVELOPMENT                              | 0.90 | 0.14 | 0 | 0 | 0 | not significant |
| 10263 | RATTENBACHER_BOUND_BY_CELF1                               | 0.90 | 0.13 | 0 | 0 | 0 | not significant |
| 10264 | GO_DENDRITIC_TREE                                         | 0.90 | 0.12 | 0 | 0 | 0 | not significant |
| 10265 | GO_SIGNAL_RELEASE                                         | 0.90 | 0.12 | 0 | 0 | 0 | not significant |
| 10266 | GO_VACUOLAR_PART                                          | 0.90 | 0.12 | 0 | 0 | 0 | not significant |
| 10267 | PARENT_MTOR_SIGNALING_UP                                  | 0.90 | 0.11 | 0 | 0 | 0 | not significant |
| 10268 | GO_CARBOHYDRATE_DERIVATIVE_BIOSYNTHETIC_PROCESS           | 0.90 | 0.10 | 0 | 0 | 0 | not significant |
| 10269 | GO_PLASMA_MEMBRANE_REGION                                 | 0.90 | 0.10 | 0 | 0 | 0 | not significant |
| 10270 | GO_EMBRYO_DEVELOPMENT                                     | 0.90 | 0.09 | 0 | 0 | 0 | not significant |
| 10271 | GO_POSITIVE_REGULATION_OF_SIGNALING                       | 0.90 | 0.07 | 0 | 0 | 0 | not significant |
| 10272 | REACTOME_GENE_EXPRESSION_TRANSCRIPTION                    | 0.90 | 0.07 | 0 | 0 | 0 | not significant |
| 10273 | GO_ADRENERGIC_RECEPTOR_BINDING                            | 0.91 | 0.25 | 0 | 0 | 0 | not significant |
| 10274 | GO_INTERLEUKIN_17_PRODUCTION                              | 0.91 | 0.25 | 0 | 0 | 0 | not significant |
| 10275 | GO_ARMADILLO_REPEAT_DOMAIN_BINDING                        | 0.91 | 0.24 | 0 | 0 | 0 | not significant |
| 10276 | GO_ESCRT_I_COMPLEX                                        | 0.91 | 0.24 | 0 | 0 | 0 | not significant |
| 10277 | GO_EXPLORATION_BEHAVIOR                                   | 0.91 | 0.24 | 0 | 0 | 0 | not significant |
| 10278 | GO_GTP_BIOSYNTHETIC_PROCESS                               | 0.91 | 0.24 | 0 | 0 | 0 | not significant |
| 10279 | GO_HEPARIN_BIOSYNTHETIC_PROCESS                           | 0.91 | 0.24 | 0 | 0 | 0 | not significant |
| 10280 | REACTOME_COBALAMIN_CBL_VITAMIN_B12_TRANSPORT_AND_METABO   | 0.91 | 0.24 | 0 | 0 | 0 | not significant |
| 10281 | REACTOME_HS_GAG_DEGRADATION                               | 0.91 | 0.24 | 0 | 0 | 0 | not significant |
| 10282 | REACTOME_P75NTR_SIGNALS_VIA_NF_KB                         | 0.91 | 0.24 | 0 | 0 | 0 | not significant |
| 10283 | SUZUKI_CTCFL_TARGETS_UP                                   | 0.91 | 0.24 | 0 | 0 | 0 | not significant |
| 10284 | ZERBINI_RESPONSE_TO_SULINDAC_UP                           | 0.91 | 0.24 | 0 | 0 | 0 | not significant |
| 10285 | BIOCARTA_BTG2_PATHWAY                                     | 0.91 | 0.23 | 0 | 0 | 0 | not significant |
| 10286 | CHOW_RASSF1_TARGETS_DN                                    | 0.91 | 0.23 | 0 | 0 | 0 | not significant |
| 10287 | GO_14_3_3_PROTEIN_BINDING                                 | 0.91 | 0.23 | 0 | 0 | 0 | not significant |
| 10288 | GO_CORE_PROMOTER_BINDING                                  | 0.91 | 0.23 | 0 | 0 | 0 | not significant |
| 10289 | GO_NADPLUS_BINDING                                        | 0.91 | 0.23 | 0 | 0 | 0 | not significant |
| 10290 | GO_NEGATIVE_REGULATION_OF_DNA_DEPENDENT_DNA_REPLICATION   | 0.91 | 0.23 | 0 | 0 | 0 | not significant |
| 10291 | GO_NEGATIVE_REGULATION_OF_SYSTEMIC_ARTERIAL_BLOOD_PRESSU  | 0.91 | 0.23 | 0 | 0 | 0 | not significant |
| 10292 | GO_POSITIVE_REGULATION_OF_ADENYLATE_CYCLASE_ACTIVITY      | 0.91 | 0.23 | 0 | 0 | 0 | not significant |
| 10293 | GO_PRO_B_CELL_DIFFERENTIATION                             | 0.91 | 0.23 | 0 | 0 | 0 | not significant |
| 10294 | GO_PROTEIN_TRANSPORT_WITHIN_LIPID_BILAYER                 | 0.91 | 0.23 | 0 | 0 | 0 | not significant |
| 10295 | GO_RESPONSE_TO_INTERLEUKIN_6                              | 0.91 | 0.23 | 0 | 0 | 0 | not significant |
| 10296 | GO_TROPHOBLAST_GIANT_CELL_DIFFERENTIATION                 | 0.91 | 0.23 | 0 | 0 | 0 | not significant |
| 10297 | HERNANDEZ_ABERRANT_MITOSIS_BY_DOCETACEL_2NM_UP            | 0.91 | 0.23 | 0 | 0 | 0 | not significant |
| 10298 | IYENGAR_RESPONSE_TO_ADIPOCYTE_FACTORS                     | 0.91 | 0.23 | 0 | 0 | 0 | not significant |
| 10299 | KRAS_BREAST_UP_V1_UP                                      | 0.91 | 0.23 | 0 | 0 | 0 | not significant |
| 10300 | LIN_TUMOR_ESCAPE_FROM_IMMUNE_ATTACK                       | 0.91 | 0.23 | 0 | 0 | 0 | not significant |
| 10301 | MISHRA_CARCINOMA_ASSOCIATED_FIBROBLAST_DN                 | 0.91 | 0.23 | 0 | 0 | 0 | not significant |
| 10302 | REACTOME_GO_AND_EARLY_G1                                  | 0.91 | 0.23 | 0 | 0 | 0 | not significant |
| 10303 | SANCHEZ_MDM2_TARGETS                                      | 0.91 | 0.23 | 0 | 0 | 0 | not significant |
| 10304 | ZHAN_LATE_DIFFERENTIATION_GENES_DN                        | 0.91 | 0.23 | 0 | 0 | 0 | not significant |
| 10305 | BCAT_GDS748_UP                                            | 0.91 | 0.22 | 0 | 0 | 0 | not significant |
| 10306 | GO_ADHERENS_JUNCTION_ASSEMBLY                             | 0.91 | 0.22 | 0 | 0 | 0 | not significant |
| 10307 | GO_B_CELL_RECEPTOR_SIGNALING_PATHWAY                      | 0.91 | 0.22 | 0 | 0 | 0 | not significant |
| 10308 | GO_CELL_DIFFERENTIATION_INVOLVED_IN_EMBRYONIC_PLACENTA_DE | 0.91 | 0.22 | 0 | 0 | 0 | not significant |
| 10309 | GO_HEART_VALVE_FORMATION                                  | 0.91 | 0.22 | 0 | 0 | 0 | not significant |
| 10310 | GO_N_TERMINAL_PROTEIN_LIPIDATION                          | 0.91 | 0.22 | 0 | 0 | 0 | not significant |
| 10311 | GO_PROTEIN_GERANYLGERANYLATION                            | 0.91 | 0.22 | 0 | 0 | 0 | not significant |
| 10312 | GO_RESPONSE_TO_AMYLOID_BETA                               | 0.91 | 0.22 | 0 | 0 | 0 | not significant |
| 10313 | GO_SCAR_COMPLEX                                           | 0.91 | 0.22 | 0 | 0 | 0 | not significant |
| 10314 | GRANDVAUX_IRF3_TARGETS_DN                                 | 0.91 | 0.22 | 0 | 0 | 0 | not significant |
| 10315 | GUILLAUMOND_KLF10_TARGETS_UP                              | 0.91 | 0.22 | 0 | 0 | 0 | not significant |
| 10316 | REACTOME_FATTY_ACIDS_BOUND_TO_GPR40_FFAR1_REGULATE_INSU   | 0.91 | 0.22 | 0 | 0 | 0 | not significant |
| 10317 | GO_CELLULAR_RESPONSE_TO_ANTIBIOTIC                        | 0.91 | 0.21 | 0 | 0 | 0 | not significant |
| 10318 | GO_GROWTH_FACTOR_BINDING                                  | 0.91 | 0.21 | 0 | 0 | 0 | not significant |
| 10319 | GO_NAD_DEPENDENT_PROTEIN_DEACETYLASE_ACTIVITY             | 0.91 | 0.21 | 0 | 0 | 0 | not significant |
| 10320 | GO_PHOSPHATIDYLINOSITOL_BISPHOSPHATE_BINDING              | 0.91 | 0.21 | 0 | 0 | 0 | not significant |
| 10321 | PID_RB_1PATHWAY                                           | 0.91 | 0.21 | 0 | 0 | 0 | not significant |
| 10322 | REACTOME_L1CAM_INTERACTIONS                               | 0.91 | 0.21 | 0 | 0 | 0 | not significant |
| 10323 | BONCI_TARGETS_OF_MIR15A_AND_MIR16_1                       | 0.91 | 0.20 | 0 | 0 | 0 | not significant |
| 10324 | GO_MEIOTIC_CELL_CYCLE_PROCESS                             | 0.91 | 0.20 | 0 | 0 | 0 | not significant |
| 10325 | PANGAS_TUMOR_SUPPRESSION_BY_SMAD1_AND_SMAD5_UP            | 0.91 | 0.20 | 0 | 0 | 0 | not significant |
| 10326 | PID_FCR1_PATHWAY                                          | 0.91 | 0.20 | 0 | 0 | 0 | not significant |
| 10327 | TONKS_TARGETS_OF_RUNX1_RUNX1T1_FUSION GRANULOCYTE_UP      | 0.91 | 0.20 | 0 | 0 | 0 | not significant |
| 10328 | GO_CELL_CYCLE_DNA_REPLICATION                             | 0.91 | 0.19 | 0 | 0 | 0 | not significant |
| 10329 | GO_CYTOPLASMIC_SIDE_OF_MEMBRANE                           | 0.91 | 0.19 | 0 | 0 | 0 | not significant |
| 10330 | GO_RNA_POLYMERASE_II_DISTAL_ENHANCER_SEQUENCE_SPECIFIC_DN | 0.91 | 0.19 | 0 | 0 | 0 | not significant |
| 10331 | SLEBOS_HEAD_AND_NECK_CANCER_WITH_HPV_UP                   | 0.91 | 0.19 | 0 | 0 | 0 | not significant |
| 10332 | GO_ACTIVE_TRANSMEMBRANE_TRANSPORTER_ACTIVITY              | 0.91 | 0.17 | 0 | 0 | 0 | not significant |
| 10333 | GO_GERM_CELL_DEVELOPMENT                                  | 0.91 | 0.17 | 0 | 0 | 0 | not significant |
| 10334 | KARLSSON_TGFB1_TARGETS_DN                                 | 0.91 | 0.17 | 0 | 0 | 0 | not significant |
| 10335 | FULCHER_INFLAMMATORY_RESPONSE_LECTIN_VS_LPS_DN            | 0.91 | 0.15 | 0 | 0 | 0 | not significant |
| 10336 | GO_EMBRYONIC_MORPHOGENESIS                                | 0.91 | 0.15 | 0 | 0 | 0 | not significant |
| 10337 | KUMAR_TARGETS_OF_MLL_AF9_FUSION                           | 0.91 | 0.15 | 0 | 0 | 0 | not significant |
| 10338 | RODRIGUES_THYROID_CARCINOMA_ANAPLASTIC_DN                 | 0.91 | 0.14 | 0 | 0 | 0 | not significant |
| 10339 | GO_VACUOLE                                                | 0.91 | 0.13 | 0 | 0 | 0 | not significant |
| 10340 | GO_POSITIVE_REGULATION_OF_CELL_DEATH                      | 0.91 | 0.12 | 0 | 0 | 0 | not significant |
| 10341 | GO_SYNAPSE_PART                                           | 0.91 | 0.11 | 0 | 0 | 0 | not significant |
| 10342 | GO_PROTEIN_LOCALIZATION_TO_ORGANELLE                      | 0.91 | 0.10 | 0 | 0 | 0 | not significant |
| 10343 | GO_REGULATION_OF_STORE_OPERATED_CALCIIUM_CHANNEL_ACTIVITY | 0.92 | 0.27 | 0 | 0 | 0 | not significant |



|       |                                                            |      |      |   |   |   |                 |
|-------|------------------------------------------------------------|------|------|---|---|---|-----------------|
| 10344 | VANDESLUIS_COMM1_TARGETS_GROUP_3_DN                        | 0.92 | 0.27 | 0 | 0 | 0 | not significant |
| 10345 | CHR7P13                                                    | 0.92 | 0.26 | 0 | 0 | 0 | not significant |
| 10346 | GO_ANION_ANION_ANTIPORTER_ACTIVITY                         | 0.92 | 0.26 | 0 | 0 | 0 | not significant |
| 10347 | GO_NEGATIVE_REGULATION_OF_ORGAN_GROWTH                     | 0.92 | 0.26 | 0 | 0 | 0 | not significant |
| 10348 | GO_NEGATIVE_REGULATION_OF_STRESS_ACTIVATED_PROTEIN_KINASE  | 0.92 | 0.26 | 0 | 0 | 0 | not significant |
| 10349 | GO_SINGLE_STRAND_BREAK_REPAIR                              | 0.92 | 0.26 | 0 | 0 | 0 | not significant |
| 10350 | TSENG_ADIPOGENIC_POTENTIAL_DN                              | 0.92 | 0.26 | 0 | 0 | 0 | not significant |
| 10351 | ABDULRAHMAN_KIDNEY_CANCER_VHL_UP                           | 0.92 | 0.25 | 0 | 0 | 0 | not significant |
| 10352 | GO_FOREBRAIN_CELL_MIGRATION                                | 0.92 | 0.25 | 0 | 0 | 0 | not significant |
| 10353 | GO_INTRINSIC_APOPTOTIC_SIGNALING_PATHWAY_IN_RESPONSE_TO_DI | 0.92 | 0.25 | 0 | 0 | 0 | not significant |
| 10354 | GO_PHOSPHATIDYLINOSITOL_5_PHOSPHATE_BINDING                | 0.92 | 0.25 | 0 | 0 | 0 | not significant |
| 10355 | GO_POSITIVE_REGULATION_OF_SIGNAL_TRANSDUCTION_BY_P53_CLAS  | 0.92 | 0.25 | 0 | 0 | 0 | not significant |
| 10356 | GO_PROSTANOID_METABOLIC_PROCESS                            | 0.92 | 0.25 | 0 | 0 | 0 | not significant |
| 10357 | GO_REGULATION_OF_SMOOTH_MUSCLE_CELL_DIFFERENTIATION        | 0.92 | 0.25 | 0 | 0 | 0 | not significant |
| 10358 | GO_REGULATION_OF_STEM_CELL_PROLIFERATION                   | 0.92 | 0.25 | 0 | 0 | 0 | not significant |
| 10359 | GO_REPLICATION_FORK_PROTECTION                             | 0.92 | 0.25 | 0 | 0 | 0 | not significant |
| 10360 | GO_SYNAPTONEMAL_COMPLEX_ORGANIZATION                       | 0.92 | 0.25 | 0 | 0 | 0 | not significant |
| 10361 | HERNANDEZ_MITOTIC_ARREST_BY_DOCETAXEL_2_UP                 | 0.92 | 0.25 | 0 | 0 | 0 | not significant |
| 10362 | HOLLERN_PAPILLARY_BREAST_TUMOR                             | 0.92 | 0.25 | 0 | 0 | 0 | not significant |
| 10363 | MARIADASON_RESPONSE_TO_CURCUMIN_SULINDAC_7                 | 0.92 | 0.25 | 0 | 0 | 0 | not significant |
| 10364 | PLASARI_TGFB1_SIGNALING_VIA_NFIC_10HR_UP                   | 0.92 | 0.25 | 0 | 0 | 0 | not significant |
| 10365 | REACTOME_PTK6_REGULATES_RTKS_AND_THEIR_EFFECTORS_AKT1_f    | 0.92 | 0.25 | 0 | 0 | 0 | not significant |
| 10366 | REACTOME_REGULATION_OF_KIT_SIGNALING                       | 0.92 | 0.25 | 0 | 0 | 0 | not significant |
| 10367 | REACTOME_TP53_REGULATES_TRANSCRIPTION_OF_GENES_INVOLVED    | 0.92 | 0.25 | 0 | 0 | 0 | not significant |
| 10368 | VERRECCHIA_RESPONSE_TO_TGFB1_C1                            | 0.92 | 0.25 | 0 | 0 | 0 | not significant |
| 10369 | VILIMAS_NOTCH1_TARGETS_UP                                  | 0.92 | 0.25 | 0 | 0 | 0 | not significant |
| 10370 | GARGALOVIC_RESPONSE_TO_OXIDIZED_PHOSPHOLIPIDS_MAGENTA_UP   | 0.92 | 0.24 | 0 | 0 | 0 | not significant |
| 10371 | GO_CELL_SUBSTRATE_JUNCTION_ASSEMBLY                        | 0.92 | 0.24 | 0 | 0 | 0 | not significant |
| 10372 | GO_FIBRONECTIN_BINDING                                     | 0.92 | 0.24 | 0 | 0 | 0 | not significant |
| 10373 | GO_MICROVILLUS_ASSEMBLY                                    | 0.92 | 0.24 | 0 | 0 | 0 | not significant |
| 10374 | GO_NOTCH_RECEPTOR_PROCESSING                               | 0.92 | 0.24 | 0 | 0 | 0 | not significant |
| 10375 | GO_PROTEIN_KINASE_A_SIGNALING                              | 0.92 | 0.24 | 0 | 0 | 0 | not significant |
| 10376 | GO_REGULATION_OF_FEMALE_GONAD_DEVELOPMENT                  | 0.92 | 0.24 | 0 | 0 | 0 | not significant |
| 10377 | GO_REGULATION_OF_TRANSCRIPTION_INVOLVED_IN_CELL_FATE_COM   | 0.92 | 0.24 | 0 | 0 | 0 | not significant |
| 10378 | PID_INTEGRIN_CS_PATHWAY                                    | 0.92 | 0.24 | 0 | 0 | 0 | not significant |
| 10379 | REACTOME_CHAPERONE_MEDIATED_AUTOPHAGY                      | 0.92 | 0.24 | 0 | 0 | 0 | not significant |
| 10380 | REACTOME_RUNX2_REGULATES_OSTEOBLAST_DIFFERENTIATION        | 0.92 | 0.24 | 0 | 0 | 0 | not significant |
| 10381 | CHR7P22                                                    | 0.92 | 0.23 | 0 | 0 | 0 | not significant |
| 10382 | GO_ANGIOTENSIN_RECEPTOR_BINDING                            | 0.92 | 0.23 | 0 | 0 | 0 | not significant |
| 10383 | GO_BASEMENT_MEMBRANE_ORGANIZATION                          | 0.92 | 0.23 | 0 | 0 | 0 | not significant |
| 10384 | GO_BLEB                                                    | 0.92 | 0.23 | 0 | 0 | 0 | not significant |
| 10385 | GO_CELLULAR_RESPONSE_TO_X_RAY                              | 0.92 | 0.23 | 0 | 0 | 0 | not significant |
| 10386 | GO_NEGATIVE_REGULATION_OF_HIPPO_SIGNALING                  | 0.92 | 0.23 | 0 | 0 | 0 | not significant |
| 10387 | GO_POSITIVE_REGULATION_OF_AXONOGENESIS                     | 0.92 | 0.23 | 0 | 0 | 0 | not significant |
| 10388 | GO_PROTEIN_LOCALIZATION_TO_VACUOLE                         | 0.92 | 0.23 | 0 | 0 | 0 | not significant |
| 10389 | LUI_THYROID_CANCER_CLUSTER_4                               | 0.92 | 0.23 | 0 | 0 | 0 | not significant |
| 10390 | PID_P38_ALPHA_BETA_DOWNSTREAM_PATHWAY                      | 0.92 | 0.23 | 0 | 0 | 0 | not significant |
| 10391 | REACTOME_BICARBONATE_TRANSPORTERS                          | 0.92 | 0.23 | 0 | 0 | 0 | not significant |
| 10392 | GO_INTRINSIC_COMPONENT_OF_GOLGI_MEMBRANE                   | 0.92 | 0.22 | 0 | 0 | 0 | not significant |
| 10393 | GO_OMEGA_PEPTIDASE_ACTIVITY                                | 0.92 | 0.22 | 0 | 0 | 0 | not significant |
| 10394 | GO_POSITIVE_REGULATION_OF_MORPHOGENESIS_OF_AN_EPITHELIUM   | 0.92 | 0.22 | 0 | 0 | 0 | not significant |
| 10395 | GO_REGULATION_OF_EXOCYTOSIS                                | 0.92 | 0.22 | 0 | 0 | 0 | not significant |
| 10396 | GO_RESPONSE_TO_FIBROBLAST_GROWTH_FACTOR                    | 0.92 | 0.22 | 0 | 0 | 0 | not significant |
| 10397 | PID_ARF6_TRAFFICKING_PATHWAY                               | 0.92 | 0.22 | 0 | 0 | 0 | not significant |
| 10398 | YU_MYC_TARGETS_DN                                          | 0.92 | 0.22 | 0 | 0 | 0 | not significant |
| 10399 | ZHAN_MULTIPLE_MYELOMA_LB_DN                                | 0.92 | 0.22 | 0 | 0 | 0 | not significant |
| 10400 | GO_DENDRITE_MORPHOGENESIS                                  | 0.92 | 0.21 | 0 | 0 | 0 | not significant |
| 10401 | GO_DIOXYGENASE_ACTIVITY                                    | 0.92 | 0.21 | 0 | 0 | 0 | not significant |
| 10402 | GO_REGULATION_OF_RECEPTOR_MEDIATED_ENDOCYTOSIS             | 0.92 | 0.21 | 0 | 0 | 0 | not significant |
| 10403 | REACTOME_GLUTAMATE_BINDING_ACTIVATION_OF_AMPA_RECEPTORS    | 0.92 | 0.21 | 0 | 0 | 0 | not significant |
| 10404 | STEARMAN_LUNG_CANCER_EARLY_VS_LATE_UP                      | 0.92 | 0.21 | 0 | 0 | 0 | not significant |
| 10405 | GO_APICAL_PLASMA_MEMBRANE                                  | 0.92 | 0.20 | 0 | 0 | 0 | not significant |
| 10406 | GO_CELL_JUNCTION_ORGANIZATION                              | 0.92 | 0.20 | 0 | 0 | 0 | not significant |
| 10407 | GO_POSITIVE_REGULATION_OF_MITOCHONDRION_ORGANIZATION       | 0.92 | 0.20 | 0 | 0 | 0 | not significant |
| 10408 | REACTOME_DDX58_IFI1_MEDIATED_INDUCION_OF_INTERFERON_ALPH   | 0.92 | 0.20 | 0 | 0 | 0 | not significant |
| 10409 | WAMUNYOKOLI_OVARIAN_CANCER_LMP_DN                          | 0.92 | 0.20 | 0 | 0 | 0 | not significant |
| 10410 | ZHANG_BREAST_CANCER_PROGENITORS_DN                         | 0.92 | 0.20 | 0 | 0 | 0 | not significant |
| 10411 | GO_REGULATION_OF_ACTIN_FILAMENT_ORGANIZATION               | 0.92 | 0.19 | 0 | 0 | 0 | not significant |
| 10412 | KEGG_PATHWAYS_IN_CANCER                                    | 0.92 | 0.18 | 0 | 0 | 0 | not significant |
| 10413 | GO_NEGATIVE_REGULATION_OF_CELL_DIFFERENTIATION             | 0.92 | 0.17 | 0 | 0 | 0 | not significant |
| 10414 | GO_RAS_PROTEIN_SIGNAL_TRANSDUCTION                         | 0.92 | 0.17 | 0 | 0 | 0 | not significant |
| 10415 | GO_REGULATION_OF_CELL_MORPHOGENESIS_INVOLVED_IN_DIFFEREN   | 0.92 | 0.17 | 0 | 0 | 0 | not significant |
| 10416 | TORCHIA_TARGETS_OF_EWSR1_FL11_FUSION_DN                    | 0.92 | 0.17 | 0 | 0 | 0 | not significant |
| 10417 | GO_CELL_SURFACE_RECEPTOR_SIGNALING_PATHWAY_INVOLVED_IN_C   | 0.92 | 0.16 | 0 | 0 | 0 | not significant |
| 10418 | ZWANG_CLASS_1_TRANSIENTLY_INDUCED_BY_EGF                   | 0.92 | 0.16 | 0 | 0 | 0 | not significant |
| 10419 | GO_REGULATION_OF_SECRETION                                 | 0.92 | 0.14 | 0 | 0 | 0 | not significant |
| 10420 | GO_CELL_CELL_SIGNALING                                     | 0.92 | 0.12 | 0 | 0 | 0 | not significant |
| 10421 | GO_REPRODUCTION                                            | 0.92 | 0.11 | 0 | 0 | 0 | not significant |
| 10422 | GO_REGULATION_OF_CELL_DIFFERENTIATION                      | 0.92 | 0.10 | 0 | 0 | 0 | not significant |
| 10423 | FERRANDO_HOX11_NEIGHBORS                                   | 0.93 | 0.27 | 0 | 0 | 0 | not significant |
| 10424 | GO_AMYLOID_PRECURSOR_PROTEIN_BIOSYNTHETIC_PROCESS          | 0.93 | 0.27 | 0 | 0 | 0 | not significant |
| 10425 | GO_CHOLESTEROL_TRANSPORTER_ACTIVITY                        | 0.93 | 0.27 | 0 | 0 | 0 | not significant |
| 10426 | GO_POSITIVE_REGULATION_OF_CHEMOTAXIS                       | 0.93 | 0.27 | 0 | 0 | 0 | not significant |
| 10427 | GO_SPINAL_CORD_PATTERNING                                  | 0.93 | 0.27 | 0 | 0 | 0 | not significant |
| 10428 | KHETCHOUMIAN_TRIM24_TARGETS_UP                             | 0.93 | 0.27 | 0 | 0 | 0 | not significant |
| 10429 | MULLIGAN_NTF3_SIGNALING_VIA_INSR_AND_IGF1R_DN              | 0.93 | 0.27 | 0 | 0 | 0 | not significant |
| 10430 | WHITE_NEUROBLASTOMA_WITH_1P36_3_DELETION                   | 0.93 | 0.27 | 0 | 0 | 0 | not significant |
| 10431 | BAELDE_DIABETIC_NEPHROPATHY_UP                             | 0.93 | 0.26 | 0 | 0 | 0 | not significant |
| 10432 | GO_CORPUS_CALLOSUM_DEVELOPMENT                             | 0.93 | 0.26 | 0 | 0 | 0 | not significant |
| 10433 | GO_HAUS_COMPLEX                                            | 0.93 | 0.26 | 0 | 0 | 0 | not significant |
| 10434 | GO_PHOSPHODIESTERASE_I_ACTIVITY                            | 0.93 | 0.26 | 0 | 0 | 0 | not significant |
| 10435 | GO_POSITIVE_REGULATION_OF_PRI_MIRNA_TRANSCRIPTION_BY_RNA_F | 0.93 | 0.26 | 0 | 0 | 0 | not significant |
| 10436 | GO_PROTEIN_KINASE_C_ACTIVATING_G_PROTEIN_COUPLED_RECEPTO   | 0.93 | 0.26 | 0 | 0 | 0 | not significant |
| 10437 | GO_PYRIDINE_CONTAINING_COMPOUND_BIOSYNTHETIC_PROCESS       | 0.93 | 0.26 | 0 | 0 | 0 | not significant |
| 10438 | GO_SALIVARY_GLAND_DEVELOPMENT                              | 0.93 | 0.26 | 0 | 0 | 0 | not significant |
| 10439 | PID_ATF2_PATHWAY                                           | 0.93 | 0.26 | 0 | 0 | 0 | not significant |
| 10440 | REACTOME_NEGATIVE_REGULATION_OF_MET_ACTIVITY               | 0.93 | 0.26 | 0 | 0 | 0 | not significant |
| 10441 | RODRIGUES_THYROID_CARCINOMA_UP                             | 0.93 | 0.26 | 0 | 0 | 0 | not significant |
| 10442 | DAIRKEE_TERT_TARGETS_DN                                    | 0.93 | 0.25 | 0 | 0 | 0 | not significant |
| 10443 | GO_ACUTE_INFLAMMATORY_RESPONSE                             | 0.93 | 0.25 | 0 | 0 | 0 | not significant |
| 10444 | GO_CYTOKINE_PRODUCTION_INVOLVED_IN_INFLAMMATORY_RESPONSE   | 0.93 | 0.25 | 0 | 0 | 0 | not significant |
| 10445 | GO_FLAP_ENDONUCLEASE_ACTIVITY                              | 0.93 | 0.25 | 0 | 0 | 0 | not significant |
| 10446 | GO_HEPARAN_SULFATE_PROTEOGLYCAN_BIOSYNTHETIC_PROCESS_PC    | 0.93 | 0.25 | 0 | 0 | 0 | not significant |
| 10447 | GO_HOMOCYSTEINE_METABOLIC_PROCESS                          | 0.93 | 0.25 | 0 | 0 | 0 | not significant |
| 10448 | GO_NEGATIVE_REGULATION_OF_PERK_MEDIATED_UNFOLDED_PROTEIN   | 0.93 | 0.25 | 0 | 0 | 0 | not significant |
| 10449 | GO_NEUROMUSCULAR_JUNCTION_DEVELOPMENT                      | 0.93 | 0.25 | 0 | 0 | 0 | not significant |
| 10450 | GO_PEPTIDE_HORMONE_BINDING                                 | 0.93 | 0.25 | 0 | 0 | 0 | not significant |
| 10451 | GO_POSITIVE_REGULATION_OF_LIGASE_ACTIVITY                  | 0.93 | 0.25 | 0 | 0 | 0 | not significant |
| 10452 | GO_POSITIVE_REGULATION_OF_SPHINGOLIPID_BIOSYNTHETIC_PROCES | 0.93 | 0.25 | 0 | 0 | 0 | not significant |

|       |                                                            |      |      |   |   |   |                 |
|-------|------------------------------------------------------------|------|------|---|---|---|-----------------|
| 10453 | GO_RIG_I_SIGNALING_PATHWAY                                 | 0.93 | 0.25 | 0 | 0 | 0 | not significant |
| 10454 | GO_TUBULIN_DEACETYLATION                                   | 0.93 | 0.25 | 0 | 0 | 0 | not significant |
| 10455 | KORKOLA_YOLK_SAC_TUMOR                                     | 0.93 | 0.25 | 0 | 0 | 0 | not significant |
| 10456 | ONO_AML1_TARGETS_UP                                        | 0.93 | 0.25 | 0 | 0 | 0 | not significant |
| 10457 | STAMBOLSKY_RESPONSE_TO_VITAMIN_D3_UP                       | 0.93 | 0.25 | 0 | 0 | 0 | not significant |
| 10458 | YAO_TEMPORAL_RESPONSE_TO_PROGESTERONE_CLUSTER_2            | 0.93 | 0.25 | 0 | 0 | 0 | not significant |
| 10459 | BIOCARTA_CELLCYCLE_PATHWAY                                 | 0.93 | 0.24 | 0 | 0 | 0 | not significant |
| 10460 | GO_MOLTING_CYCLE                                           | 0.93 | 0.24 | 0 | 0 | 0 | not significant |
| 10461 | GO_POSITIVE_REGULATION_OF_DENDRITE_DEVELOPMENT             | 0.93 | 0.24 | 0 | 0 | 0 | not significant |
| 10462 | GO_RNA_POLYMERASE_II_TRANSCRIPTION_FACTOR_BINDING          | 0.93 | 0.24 | 0 | 0 | 0 | not significant |
| 10463 | GO_VASCULAR_ENDOTHELIAL_GROWTH_FACTOR_SIGNALING_PATHWAY    | 0.93 | 0.24 | 0 | 0 | 0 | not significant |
| 10464 | CHR10Q24                                                   | 0.93 | 0.23 | 0 | 0 | 0 | not significant |
| 10465 | GO_MIDBRAIN_DOPAMINERGIC_NEURON_DIFFERENTIATION            | 0.93 | 0.23 | 0 | 0 | 0 | not significant |
| 10466 | GO_NEGATIVE_REGULATION_OF_CELL_ACTIVATION                  | 0.93 | 0.23 | 0 | 0 | 0 | not significant |
| 10467 | GO_ORGANOPHOSPHATE_ESTER_TRANSPORT                         | 0.93 | 0.23 | 0 | 0 | 0 | not significant |
| 10468 | GO_PROTEIN_LOCALIZATION_TO_SYNAPSE                         | 0.93 | 0.23 | 0 | 0 | 0 | not significant |
| 10469 | GO_REGULATION_OF_ANION_TRANSPORT                           | 0.93 | 0.23 | 0 | 0 | 0 | not significant |
| 10470 | GO_FIBROBLAST_GROWTH_FACTOR_RECEPTOR_SIGNALING_PATHWAY     | 0.93 | 0.22 | 0 | 0 | 0 | not significant |
| 10471 | GO_GLIOGENESIS                                             | 0.93 | 0.22 | 0 | 0 | 0 | not significant |
| 10472 | GO_MODIFICATION_DEPENDENT_PROTEIN_BINDING                  | 0.93 | 0.22 | 0 | 0 | 0 | not significant |
| 10473 | GO_POSITIVE_REGULATION_OF_T_CELL_MEDIATED_IMMUNITY         | 0.93 | 0.22 | 0 | 0 | 0 | not significant |
| 10474 | HALLMARK_APOPTOSIS                                         | 0.93 | 0.22 | 0 | 0 | 0 | not significant |
| 10475 | JNK_DN.V1_DN                                               | 0.93 | 0.22 | 0 | 0 | 0 | not significant |
| 10476 | KEGG_MELANOGENESIS                                         | 0.93 | 0.22 | 0 | 0 | 0 | not significant |
| 10477 | KUMAR_AUTOPHAGY_NETWORK                                    | 0.93 | 0.22 | 0 | 0 | 0 | not significant |
| 10478 | LTE2_UP.V1_UP                                              | 0.93 | 0.22 | 0 | 0 | 0 | not significant |
| 10479 | DOANE_RESPONSE_TO_ANDROGEN_DN                              | 0.93 | 0.21 | 0 | 0 | 0 | not significant |
| 10480 | GO_AXON_DEVELOPMENT                                        | 0.93 | 0.19 | 0 | 0 | 0 | not significant |
| 10481 | GINESTIER_BREAST_CANCER_ZNF217_AMPLIFIED_DN                | 0.93 | 0.18 | 0 | 0 | 0 | not significant |
| 10482 | GO_METAL_ION_TRANSMEMBRANE_TRANSPORTER_ACTIVITY            | 0.93 | 0.18 | 0 | 0 | 0 | not significant |
| 10483 | GO_REGULATION_OF_DNA_BINDING_TRANSCRIPTION_FACTOR_ACTIVIT  | 0.93 | 0.18 | 0 | 0 | 0 | not significant |
| 10484 | CHIGAS_RB1_TARGETS_SENESCENCE                              | 0.93 | 0.17 | 0 | 0 | 0 | not significant |
| 10485 | GO_REGULATION_OF_PROTEIN_SERINE_THREONINE_KINASE_ACTIVITY  | 0.93 | 0.17 | 0 | 0 | 0 | not significant |
| 10486 | GO_TRANSMEMBRANE_RECEPTOR_PROTEIN_TYROSINE_KINASE_SIGNAL   | 0.93 | 0.17 | 0 | 0 | 0 | not significant |
| 10487 | GO_GOLGI_APPARATUS                                         | 0.93 | 0.13 | 0 | 0 | 0 | not significant |
| 10488 | GO_NEUROGENESIS                                            | 0.93 | 0.13 | 0 | 0 | 0 | not significant |
| 10489 | GO_NEURON_DIFFERENTIATION                                  | 0.93 | 0.12 | 0 | 0 | 0 | not significant |
| 10490 | GO_GAMMA_AMINOBUTYRIC_ACID_SIGNALING_PATHWAY               | 0.94 | 0.29 | 0 | 0 | 0 | not significant |
| 10491 | LI_PROSTATE_CANCER_EPIGENETIC                              | 0.94 | 0.29 | 0 | 0 | 0 | not significant |
| 10492 | ABE_VEGFA_TARGETS_30MIN                                    | 0.94 | 0.28 | 0 | 0 | 0 | not significant |
| 10493 | GO_GAMMA_TUBULIN_COMPLEX                                   | 0.94 | 0.28 | 0 | 0 | 0 | not significant |
| 10494 | GO_GLUCOCORTICOID_RECEPTOR_BINDING                         | 0.94 | 0.28 | 0 | 0 | 0 | not significant |
| 10495 | GO_MESONEPHRIC_TUBULE_MORPHOGENESIS                        | 0.94 | 0.28 | 0 | 0 | 0 | not significant |
| 10496 | GO_PROTEIN_LOCALIZATION_TO_POSTSYNAPTIC_MEMBRANE           | 0.94 | 0.28 | 0 | 0 | 0 | not significant |
| 10497 | BENNETT_SYSTEMIC_LUPUS_ERYTHEMATOSUS                       | 0.94 | 0.27 | 0 | 0 | 0 | not significant |
| 10498 | BOSCO_INTERFERON_INDUCED_ANTIVIRAL_MODULE                  | 0.94 | 0.27 | 0 | 0 | 0 | not significant |
| 10499 | GO_ADRENERGIC_RECEPTOR_SIGNALING_PATHWAY                   | 0.94 | 0.27 | 0 | 0 | 0 | not significant |
| 10500 | GO_BICARBONATE_TRANSPORT                                   | 0.94 | 0.27 | 0 | 0 | 0 | not significant |
| 10501 | GO_ESTABLISHMENT_OF_PROTEIN_LOCALIZATION_TO_PLASMA_MEMBR   | 0.94 | 0.27 | 0 | 0 | 0 | not significant |
| 10502 | GO_GLYCOLIPID_CATABOLIC_PROCESS                            | 0.94 | 0.27 | 0 | 0 | 0 | not significant |
| 10503 | GO_NEGATIVE_REGULATION_OF_INTERLEUKIN_1_PRODUCTION         | 0.94 | 0.27 | 0 | 0 | 0 | not significant |
| 10504 | GO_NEGATIVE_REGULATION_OF_SIGNALING_RECEPTOR_ACTIVITY      | 0.94 | 0.27 | 0 | 0 | 0 | not significant |
| 10505 | GO_REGULATION_OF_CHROMATIN_SILENCING                       | 0.94 | 0.27 | 0 | 0 | 0 | not significant |
| 10506 | REACTOME_RESOLUTION_OF_D_LOOP_STRUCTURES_THROUGH_SYNTI     | 0.94 | 0.27 | 0 | 0 | 0 | not significant |
| 10507 | ATM_DN.V1_UP                                               | 0.94 | 0.26 | 0 | 0 | 0 | not significant |
| 10508 | FUJII_YBK1_TARGETS_UP                                      | 0.94 | 0.26 | 0 | 0 | 0 | not significant |
| 10509 | GARGALOVIC_RESPONSE_TO_OXIDIZED_PHOSPHOLIPIDS_YELLOW_DN    | 0.94 | 0.26 | 0 | 0 | 0 | not significant |
| 10510 | GO_CELL_SURFACE_RECEPTOR_SIGNALING_PATHWAY_INVOLVED_IN_H   | 0.94 | 0.26 | 0 | 0 | 0 | not significant |
| 10511 | GO_CHEMOSENSORY_BEHAVIOR                                   | 0.94 | 0.26 | 0 | 0 | 0 | not significant |
| 10512 | GO_GROWTH_FACTOR_RECEPTOR_BINDING                          | 0.94 | 0.26 | 0 | 0 | 0 | not significant |
| 10513 | GO_HIGH_DENSITY_LIPOPROTEIN_PARTICLE                       | 0.94 | 0.26 | 0 | 0 | 0 | not significant |
| 10514 | GO_INTRACILIARY_TRANSPORT_PARTICLE_A                       | 0.94 | 0.26 | 0 | 0 | 0 | not significant |
| 10515 | GO_NEGATIVE_REGULATION_OF_FIBROBLAST_GROWTH_FACTOR_REC     | 0.94 | 0.26 | 0 | 0 | 0 | not significant |
| 10516 | GO_NEGATIVE_REGULATION_OF_MEMBRANE_PERMEABILITY            | 0.94 | 0.26 | 0 | 0 | 0 | not significant |
| 10517 | GO_POSITIVE_REGULATION_OF_CELLULAR_AMIDE_METABOLIC_PROCE   | 0.94 | 0.26 | 0 | 0 | 0 | not significant |
| 10518 | GO_POSITIVE_REGULATION_OF_FIBROBLAST_MIGRATION             | 0.94 | 0.26 | 0 | 0 | 0 | not significant |
| 10519 | GO_POSITIVE_REGULATION_OF_LIPID_CATABOLIC_PROCESS          | 0.94 | 0.26 | 0 | 0 | 0 | not significant |
| 10520 | GO_POSITIVE_REGULATION_OF_MITOPHAGY                        | 0.94 | 0.26 | 0 | 0 | 0 | not significant |
| 10521 | GO_PROTEIN_RETENTION_IN_ER_LUMEN                           | 0.94 | 0.26 | 0 | 0 | 0 | not significant |
| 10522 | GO_REGULATION_OF_HAIR_FOLLICLE_DEVELOPMENT                 | 0.94 | 0.26 | 0 | 0 | 0 | not significant |
| 10523 | GO_REGULATION_OF_PEROXISOME_PROLIFERATOR_ACTIVATED_RECE    | 0.94 | 0.26 | 0 | 0 | 0 | not significant |
| 10524 | GO_TRANSLATION_INITIATION_FACTOR_BINDING                   | 0.94 | 0.26 | 0 | 0 | 0 | not significant |
| 10525 | GO_UBIQUITIN_DEPENDENT_PROTEIN_CATABOLIC_PROCESS_VIA_THE_I | 0.94 | 0.26 | 0 | 0 | 0 | not significant |
| 10526 | INGRAM_SHH_TARGETS_UP                                      | 0.94 | 0.26 | 0 | 0 | 0 | not significant |
| 10527 | MATTIOLI_MULTIPLE_MYELOMA_WITH_14Q32_TRANSLOCATIONS        | 0.94 | 0.26 | 0 | 0 | 0 | not significant |
| 10528 | PID_PS1_PATHWAY                                            | 0.94 | 0.26 | 0 | 0 | 0 | not significant |
| 10529 | REACTOME_FERTILIZATION                                     | 0.94 | 0.26 | 0 | 0 | 0 | not significant |
| 10530 | GO_CEREBELLAR_CORTEX_FORMATION                             | 0.94 | 0.25 | 0 | 0 | 0 | not significant |
| 10531 | GO_COCHLEA_DEVELOPMENT                                     | 0.94 | 0.25 | 0 | 0 | 0 | not significant |
| 10532 | GO_NEGATIVE_CHEMOTAXIS                                     | 0.94 | 0.25 | 0 | 0 | 0 | not significant |
| 10533 | GO_POSITIVE_REGULATION_OF_LYMPHOCYTE_DIFFERENTIATION       | 0.94 | 0.25 | 0 | 0 | 0 | not significant |
| 10534 | GO_REGULATION_OF_CYTOKINE_PRODUCTION_INVOLVED_IN_IMMUNE_F  | 0.94 | 0.25 | 0 | 0 | 0 | not significant |
| 10535 | GO_RETINOL_METABOLIC_PROCESS                               | 0.94 | 0.25 | 0 | 0 | 0 | not significant |
| 10536 | GO_SPHINGOSINE_N_ACYLTRANSFERASE_ACTIVITY                  | 0.94 | 0.25 | 0 | 0 | 0 | not significant |
| 10537 | IZADPANAH_STEM_CELL_ADIPOSE_VS_BONE_UP                     | 0.94 | 0.25 | 0 | 0 | 0 | not significant |
| 10538 | LENAOUR_DENDRITIC_CELL_MATURATION_UP                       | 0.94 | 0.25 | 0 | 0 | 0 | not significant |
| 10539 | MIKKELSEN_MEF_HCP_WITH_H3_UNMETHYLATED                     | 0.94 | 0.25 | 0 | 0 | 0 | not significant |
| 10540 | REACTOME_NRF_SIGNALS_CELL_DEATH_FROM_THE_NUCLEUS           | 0.94 | 0.25 | 0 | 0 | 0 | not significant |
| 10541 | TIEN_INTESTINE_PROBIOTICS_2HR_UP                           | 0.94 | 0.25 | 0 | 0 | 0 | not significant |
| 10542 | GO_FIBROBLAST_GROWTH_FACTOR_PRODUCTION                     | 0.94 | 0.24 | 0 | 0 | 0 | not significant |
| 10543 | GO_REGULATION_OF_B_CELL_ACTIVATION                         | 0.94 | 0.24 | 0 | 0 | 0 | not significant |
| 10544 | GO_RIBOSOME                                                | 0.94 | 0.24 | 0 | 0 | 0 | not significant |
| 10545 | GOTTWEIN_TARGETS_OF_KSHV_MIR_K12_11                        | 0.94 | 0.24 | 0 | 0 | 0 | not significant |
| 10546 | PID_P53_DOWNSTREAM_PATHWAY                                 | 0.94 | 0.24 | 0 | 0 | 0 | not significant |
| 10547 | GO_CELLULAR_SENESCENCE                                     | 0.94 | 0.23 | 0 | 0 | 0 | not significant |
| 10548 | JUBAN_TARGETS_OF_SPH1_AND_FLI1_UP                          | 0.94 | 0.23 | 0 | 0 | 0 | not significant |
| 10549 | KYNG_RESPONSE_TO_H2O2                                      | 0.94 | 0.23 | 0 | 0 | 0 | not significant |
| 10550 | SCHAEFFER_PROSTATE_DEVELOPMENT_48HR_DN                     | 0.94 | 0.23 | 0 | 0 | 0 | not significant |
| 10551 | BROWNE_HCMV_INFECTION_6HR_DN                               | 0.94 | 0.22 | 0 | 0 | 0 | not significant |
| 10552 | GO_ANION_TRANSMEMBRANE_TRANSPORTER_ACTIVITY                | 0.94 | 0.22 | 0 | 0 | 0 | not significant |
| 10553 | GO_POSITIVE_REGULATION_OF_RESPONSE_TO_EXTERNAL_STIMULUS    | 0.94 | 0.22 | 0 | 0 | 0 | not significant |
| 10554 | GO_REGULATION_OF_NUCLEOTIDE_BINDING_OLIGOMERIZATION_DOMAI  | 0.94 | 0.22 | 0 | 0 | 0 | not significant |
| 10555 | SATO_SILENCED_BY_METHYLATION_IN_PANCREATIC_CANCER_1        | 0.94 | 0.22 | 0 | 0 | 0 | not significant |
| 10556 | GO_PROTEIN_KINASE_ACTIVITY                                 | 0.94 | 0.19 | 0 | 0 | 0 | not significant |
| 10557 | CREIGHTON_ENDOCRINE_THERAPY_RESISTANCE_5                   | 0.94 | 0.18 | 0 | 0 | 0 | not significant |
| 10558 | GO_REGULATION_OF_ESTABLISHMENT_OF_PROTEIN_LOCALIZATION     | 0.94 | 0.18 | 0 | 0 | 0 | not significant |
| 10559 | GO_GOLGI_MEMBRANE                                          | 0.94 | 0.17 | 0 | 0 | 0 | not significant |
| 10560 | GO_REGULATION_OF_INTRACELLULAR_SIGNAL_TRANSDUCTION         | 0.94 | 0.13 | 0 | 0 | 0 | not significant |
| 10561 | GO_SPECIFIC_GROUNULE_LUMEN                                 | 0.95 | 0.30 | 0 | 0 | 0 | not significant |

|       |                                                            |      |      |   |   |   |                 |
|-------|------------------------------------------------------------|------|------|---|---|---|-----------------|
| 10562 | BIOCARTA_ETTS_PATHWAY                                      | 0.95 | 0.29 | 0 | 0 | 0 | not significant |
| 10563 | BIOCARTA_NTHI_PATHWAY                                      | 0.95 | 0.29 | 0 | 0 | 0 | not significant |
| 10564 | CHR10Q25                                                   | 0.95 | 0.29 | 0 | 0 | 0 | not significant |
| 10565 | DANG_MYC_TARGETS_DN                                        | 0.95 | 0.29 | 0 | 0 | 0 | not significant |
| 10566 | GO_PROTEIN_COMPLEX_INVOLVED_IN_CELL_ADHESION               | 0.95 | 0.29 | 0 | 0 | 0 | not significant |
| 10567 | GO_PROTEIN_KINASE_C_SIGNALING                              | 0.95 | 0.29 | 0 | 0 | 0 | not significant |
| 10568 | PID_TCR_JNK_PATHWAY                                        | 0.95 | 0.29 | 0 | 0 | 0 | not significant |
| 10569 | CHR7Q11                                                    | 0.95 | 0.28 | 0 | 0 | 0 | not significant |
| 10570 | CHRXQ13                                                    | 0.95 | 0.28 | 0 | 0 | 0 | not significant |
| 10571 | GO_CARDIAC_MUSCLE_CELL_ACTION_POTENTIAL_INVOLVED_IN_CONF   | 0.95 | 0.28 | 0 | 0 | 0 | not significant |
| 10572 | GO_EUKARYOTIC_48S_PREINITIATION_COMPLEX                    | 0.95 | 0.28 | 0 | 0 | 0 | not significant |
| 10573 | GO_H4_HISTONE_ACETYLTRANSFERASE_ACTIVITY                   | 0.95 | 0.28 | 0 | 0 | 0 | not significant |
| 10574 | GO_LIGAND_GATED_CATION_CHANNEL_ACTIVITY                    | 0.95 | 0.28 | 0 | 0 | 0 | not significant |
| 10575 | GO_POSITIVE_REGULATION_OF_PEROXISOME_PROLIFERATOR_ACTIVAT  | 0.95 | 0.28 | 0 | 0 | 0 | not significant |
| 10576 | GO_REGULATION_OF_SYNAPTIC_TRANSMISSION_GLUTAMATERGIC       | 0.95 | 0.28 | 0 | 0 | 0 | not significant |
| 10577 | GO_SPHINGOLIPID_BIOSYNTHETIC_PROCESS                       | 0.95 | 0.28 | 0 | 0 | 0 | not significant |
| 10578 | HUANG_FOXA2_TARGETS_UP                                     | 0.95 | 0.28 | 0 | 0 | 0 | not significant |
| 10579 | KANNAN_TP53_TARGETS_DN                                     | 0.95 | 0.28 | 0 | 0 | 0 | not significant |
| 10580 | LA_MEN1_TARGETS                                            | 0.95 | 0.28 | 0 | 0 | 0 | not significant |
| 10581 | LAU_APOPTOSIS_CDKN2A_UP                                    | 0.95 | 0.28 | 0 | 0 | 0 | not significant |
| 10582 | MCCABE_HOXC6_TARGETS_DN                                    | 0.95 | 0.28 | 0 | 0 | 0 | not significant |
| 10583 | BROWNE_HCMV_INFECTION_2HR_UP                               | 0.95 | 0.27 | 0 | 0 | 0 | not significant |
| 10584 | GO_COLLATERAL_SPROUTING                                    | 0.95 | 0.27 | 0 | 0 | 0 | not significant |
| 10585 | GO_INTERLEUKIN_8_BIOSYNTHETIC_PROCESS                      | 0.95 | 0.27 | 0 | 0 | 0 | not significant |
| 10586 | GO_NEGATIVE_REGULATION_OF_SUPRAMOLECULAR_FIBER_ORGANIZA    | 0.95 | 0.27 | 0 | 0 | 0 | not significant |
| 10587 | GO_POSITIVE_REGULATION_OF_GLUONEOGENESIS                   | 0.95 | 0.27 | 0 | 0 | 0 | not significant |
| 10588 | GO_POSITIVE_REGULATION_OF_MITOTIC_NUCLEAR_DIVISION         | 0.95 | 0.27 | 0 | 0 | 0 | not significant |
| 10589 | GO_REGULATION_OF_HEPATOCYTE_PROLIFERATION                  | 0.95 | 0.27 | 0 | 0 | 0 | not significant |
| 10590 | GO_URIDYLTRANSFERASE_ACTIVITY                              | 0.95 | 0.27 | 0 | 0 | 0 | not significant |
| 10591 | GO_VOLTAGE_GATED_CALCIUM_CHANNEL_ACTIVITY                  | 0.95 | 0.27 | 0 | 0 | 0 | not significant |
| 10592 | JEON_SMAD6_TARGETS_UP                                      | 0.95 | 0.27 | 0 | 0 | 0 | not significant |
| 10593 | KOKKINAKIS_METHIONINE_DEPRIVATION_48HR_DN                  | 0.95 | 0.27 | 0 | 0 | 0 | not significant |
| 10594 | PID_TCR_CALCIUM_PATHWAY                                    | 0.95 | 0.27 | 0 | 0 | 0 | not significant |
| 10595 | TCGA_GLIOMASTOMA_COPY_NUMBER_DN                            | 0.95 | 0.27 | 0 | 0 | 0 | not significant |
| 10596 | WALLACE_PROSTATE_CANCER_RACE_DN                            | 0.95 | 0.27 | 0 | 0 | 0 | not significant |
| 10597 | ZWANG_CLASS_2_TRANSIENTLY_INDUCED_BY_EGF                   | 0.95 | 0.27 | 0 | 0 | 0 | not significant |
| 10598 | CHR11Q22                                                   | 0.95 | 0.26 | 0 | 0 | 0 | not significant |
| 10599 | CHR3Q11                                                    | 0.95 | 0.26 | 0 | 0 | 0 | not significant |
| 10600 | GO_DEOXYRIBONUCLEOSIDE_MONOPHOSPHATE_BIOSYNTHETIC_PROCE    | 0.95 | 0.26 | 0 | 0 | 0 | not significant |
| 10601 | GO_POSITIVE_REGULATION_OF_INTERLEUKIN_5_PRODUCTION         | 0.95 | 0.26 | 0 | 0 | 0 | not significant |
| 10602 | GO_POSITIVE_REGULATION_OF_SYNAPTIC_TRANSMISSION_GLUTAMATE  | 0.95 | 0.26 | 0 | 0 | 0 | not significant |
| 10603 | GO_PRESYNAPTIC_ENDOCYTOSIS                                 | 0.95 | 0.26 | 0 | 0 | 0 | not significant |
| 10604 | GO_PROTEIN_PHOSPHATASE_BINDING                             | 0.95 | 0.26 | 0 | 0 | 0 | not significant |
| 10605 | GO_REGULATION_OF_ALPHA_BETA_T_CELL_DIFFERENTIATION         | 0.95 | 0.26 | 0 | 0 | 0 | not significant |
| 10606 | GO_RESPONSE_TO_HERBICIDE                                   | 0.95 | 0.26 | 0 | 0 | 0 | not significant |
| 10607 | GO_SYNAPTIC_VESICLE_RECYCLING                              | 0.95 | 0.26 | 0 | 0 | 0 | not significant |
| 10608 | GO_UBIQUITIN_PROTEIN_TRANSFERASE_INHIBITOR_ACTIVITY        | 0.95 | 0.26 | 0 | 0 | 0 | not significant |
| 10609 | GO_VASCULAR_PROCESS_IN_CIRCULATORY_SYSTEM                  | 0.95 | 0.26 | 0 | 0 | 0 | not significant |
| 10610 | JACKSON_DNMT1_TARGETS_UP                                   | 0.95 | 0.26 | 0 | 0 | 0 | not significant |
| 10611 | LIU_NASOPHARYNGEAL_CARCINOMA                               | 0.95 | 0.26 | 0 | 0 | 0 | not significant |
| 10612 | REACTOME_ACTIVATION_OF_NOXA_AND_TRANSLOCATION_TO_MITOCHO   | 0.95 | 0.26 | 0 | 0 | 0 | not significant |
| 10613 | WANG_IMMORTALIZED_BY_HOXA9_AND_MEIS1_DN                    | 0.95 | 0.26 | 0 | 0 | 0 | not significant |
| 10614 | GO_DEVELOPMENTAL_GROWTH_INVOLVED_IN_MORPHOGENESIS          | 0.95 | 0.25 | 0 | 0 | 0 | not significant |
| 10615 | GO_NEPHRIC_DUCT_DEVELOPMENT                                | 0.95 | 0.25 | 0 | 0 | 0 | not significant |
| 10616 | GO_PHOSPHATIDYLINOSITOL_PHOSPHATE_BINDING                  | 0.95 | 0.25 | 0 | 0 | 0 | not significant |
| 10617 | GO_POSITIVE_REGULATION_OF_DNA_REPLICATION                  | 0.95 | 0.25 | 0 | 0 | 0 | not significant |
| 10618 | GO_PYROPTOSIS                                              | 0.95 | 0.25 | 0 | 0 | 0 | not significant |
| 10619 | GO_SENSORY_ORGAN_MORPHOGENESIS                             | 0.95 | 0.25 | 0 | 0 | 0 | not significant |
| 10620 | REACTOME_DISEASES_OF_IMMUNE_SYSTEM                         | 0.95 | 0.25 | 0 | 0 | 0 | not significant |
| 10621 | REACTOME_SYNTHESIS_OF_5_EICOSATETRAENOIC_ACIDS             | 0.95 | 0.25 | 0 | 0 | 0 | not significant |
| 10622 | ZHOU_INFLAMMATORY_RESPONSE_LPS_UP                          | 0.95 | 0.25 | 0 | 0 | 0 | not significant |
| 10623 | GO_CLATHRIN_LIGHT_CHAIN_BINDING                            | 0.95 | 0.24 | 0 | 0 | 0 | not significant |
| 10624 | GO_NEGATIVE_REGULATION_OF_GROWTH                           | 0.95 | 0.24 | 0 | 0 | 0 | not significant |
| 10625 | GO_SYNAPSE_ORGANIZATION                                    | 0.95 | 0.24 | 0 | 0 | 0 | not significant |
| 10626 | HOXA9_DN.V1_UP                                             | 0.95 | 0.24 | 0 | 0 | 0 | not significant |
| 10627 | GO_TRANSCRIPTION_COREGULATOR_ACTIVITY                      | 0.95 | 0.23 | 0 | 0 | 0 | not significant |
| 10628 | TBK1_DF_UP                                                 | 0.95 | 0.23 | 0 | 0 | 0 | not significant |
| 10629 | BONOME_OVARIAN_CANCER_SURVIVAL_SUBOPTIMAL_DEBULKING        | 0.95 | 0.21 | 0 | 0 | 0 | not significant |
| 10630 | GO_CENTRAL_NERVOUS_SYSTEM_DEVELOPMENT                      | 0.95 | 0.21 | 0 | 0 | 0 | not significant |
| 10631 | GO_LACTATION                                               | 0.96 | 0.32 | 0 | 0 | 0 | not significant |
| 10632 | BRACHAT_RESPONSE_TO_CAMPOTHECIN_UP                         | 0.96 | 0.31 | 0 | 0 | 0 | not significant |
| 10633 | FONTAINE_FOLLICULAR_THYROID_ADENOMA_UP                     | 0.96 | 0.31 | 0 | 0 | 0 | not significant |
| 10634 | GO_POSITIVE_REGULATION_OF_ESTABLISHMENT_OF_PROTEIN_LOCALI  | 0.96 | 0.31 | 0 | 0 | 0 | not significant |
| 10635 | GO ASPARTIC TYPE PEPTIDASE ACTIVITY                        | 0.96 | 0.30 | 0 | 0 | 0 | not significant |
| 10636 | GO_CALCIIUM_ION_IMPORT                                     | 0.96 | 0.30 | 0 | 0 | 0 | not significant |
| 10637 | GO_EARLY_PHAGOSOME                                         | 0.96 | 0.30 | 0 | 0 | 0 | not significant |
| 10638 | GO_HEPARIN_BINDING                                         | 0.96 | 0.30 | 0 | 0 | 0 | not significant |
| 10639 | GO_RESPONSE_TO_RETINOIC_ACID                               | 0.96 | 0.30 | 0 | 0 | 0 | not significant |
| 10640 | PID_PRL_SIGNALING_EVENTS_PATHWAY                           | 0.96 | 0.30 | 0 | 0 | 0 | not significant |
| 10641 | REACTOME_GLUUCURONIDATION                                  | 0.96 | 0.30 | 0 | 0 | 0 | not significant |
| 10642 | REACTOME_SYNTHESIS_OF_GLYCOSYLPHOSPHATIDYLINOSITOL_GPI     | 0.96 | 0.30 | 0 | 0 | 0 | not significant |
| 10643 | BIOCARTA_TALL1_PATHWAY                                     | 0.96 | 0.29 | 0 | 0 | 0 | not significant |
| 10644 | CHR2Q37                                                    | 0.96 | 0.29 | 0 | 0 | 0 | not significant |
| 10645 | GO_ACYLGlycerol_O_AcylTRANSFERASE_ACTIVITY                 | 0.96 | 0.29 | 0 | 0 | 0 | not significant |
| 10646 | GO_HISTONE_DEACETYLASE_ACTIVITY_H3_K14_SPECIFIC            | 0.96 | 0.29 | 0 | 0 | 0 | not significant |
| 10647 | GO_NEGATIVE_REGULATION_OF_LEUKOCYTE_MIGRATION              | 0.96 | 0.29 | 0 | 0 | 0 | not significant |
| 10648 | GO_NEGATIVE_REGULATION_OF_PROTEIN_OLIGOMERIZATION          | 0.96 | 0.29 | 0 | 0 | 0 | not significant |
| 10649 | GO_PHOSPHATIDYLINOSITOL_3_PHOSPHATE_BINDING                | 0.96 | 0.29 | 0 | 0 | 0 | not significant |
| 10650 | GO_PHOSPHOLIPASE_BINDING                                   | 0.96 | 0.29 | 0 | 0 | 0 | not significant |
| 10651 | GO_POSITIVE_REGULATION_OF_ENDOPLASMIC_RETICULUM_STRESS_IN  | 0.96 | 0.29 | 0 | 0 | 0 | not significant |
| 10652 | GO_POSITIVE_REGULATION_OF_EXECUTION_PHASE_OF_APOPTOSIS     | 0.96 | 0.29 | 0 | 0 | 0 | not significant |
| 10653 | GO_POSITIVE_REGULATION_OF_EXOCYTOSES                       | 0.96 | 0.29 | 0 | 0 | 0 | not significant |
| 10654 | GO_POSTSYNAPTIC_DENSITY_INTRACELLULAR_COMPONENT            | 0.96 | 0.29 | 0 | 0 | 0 | not significant |
| 10655 | GO_PRENylation                                             | 0.96 | 0.29 | 0 | 0 | 0 | not significant |
| 10656 | GRADE_COLON_AND_RECTAL_CANCER_DN                           | 0.96 | 0.29 | 0 | 0 | 0 | not significant |
| 10657 | HAN_JNK_SIGNALING_UP                                       | 0.96 | 0.29 | 0 | 0 | 0 | not significant |
| 10658 | TARTE_PLASMA_CELL_VS_B_LYMPHOCYTE_DN                       | 0.96 | 0.29 | 0 | 0 | 0 | not significant |
| 10659 | CHEMELLO_SOLEUS_VS_EDL_MYOFIBERS_UP                        | 0.96 | 0.28 | 0 | 0 | 0 | not significant |
| 10660 | CHR8Q13                                                    | 0.96 | 0.28 | 0 | 0 | 0 | not significant |
| 10661 | GO_CARDIAC_MUSCLE_CELL_PROLIFERATION                       | 0.96 | 0.28 | 0 | 0 | 0 | not significant |
| 10662 | GO_EMBRYONIC_AXIS_SPECIFICATION                            | 0.96 | 0.28 | 0 | 0 | 0 | not significant |
| 10663 | GO_HISTONE_H3_K9_MODIFICATION                              | 0.96 | 0.28 | 0 | 0 | 0 | not significant |
| 10664 | GO_INORGANIC_ANION_EXCHANGER_ACTIVITY                      | 0.96 | 0.28 | 0 | 0 | 0 | not significant |
| 10665 | GO_NAD_BIOSYNTHESIS_VIA_NICOTINAMIDE_RIBOSIDE_SALVAGE_PATH | 0.96 | 0.28 | 0 | 0 | 0 | not significant |
| 10666 | GO_NEGATIVE_REGULATION_OF_PROTEIN_SUMOYLATION              | 0.96 | 0.28 | 0 | 0 | 0 | not significant |
| 10667 | GO_NEGATIVE_REGULATION_OF_SODIUM_ION_TRANSMEMBRANE_TRAN    | 0.96 | 0.28 | 0 | 0 | 0 | not significant |
| 10668 | GO_POSITIVE_REGULATION_OF_HEMOPOIESIS                      | 0.96 | 0.28 | 0 | 0 | 0 | not significant |
| 10669 | GO PYRIMIDINE DEOXYRIBONUCLEOSIDE MONOPHOSPHATE BIOSYNTH   | 0.96 | 0.28 | 0 | 0 | 0 | not significant |
| 10670 | GO_REGULATION_OF_DNA_REPAIR                                | 0.96 | 0.28 | 0 | 0 | 0 | not significant |

|       |                                                            |      |      |   |   |   |                 |
|-------|------------------------------------------------------------|------|------|---|---|---|-----------------|
| 10671 | GO REGULATION OF INFLAMMATORY RESPONSE TO ANTIGENIC STIM   | 0.96 | 0.28 | 0 | 0 | 0 | not significant |
| 10672 | GO SEGMENTATION                                            | 0.96 | 0.28 | 0 | 0 | 0 | not significant |
| 10673 | GO SOMATIC DIVERSIFICATION OF IMMUNE RECEPTORS             | 0.96 | 0.28 | 0 | 0 | 0 | not significant |
| 10674 | GO SPERM MOTILITY                                          | 0.96 | 0.28 | 0 | 0 | 0 | not significant |
| 10675 | GO STEROL METABOLIC PROCESS                                | 0.96 | 0.28 | 0 | 0 | 0 | not significant |
| 10676 | GO WNT SIGNALING PATHWAY INVOLVED IN MIDBRAIN DOPAMINERGIC | 0.96 | 0.28 | 0 | 0 | 0 | not significant |
| 10677 | KIM Wt1 TARGETS UP                                         | 0.96 | 0.28 | 0 | 0 | 0 | not significant |
| 10678 | REACTOME ACETYLCHOLINE REGULATES INSULIN SECRETION         | 0.96 | 0.28 | 0 | 0 | 0 | not significant |
| 10679 | REACTOME AFLATOXIN ACTIVATION AND DETOXIFICATION           | 0.96 | 0.28 | 0 | 0 | 0 | not significant |
| 10680 | REACTOME COLLAGEN CHAIN TRIMERIZATION                      | 0.96 | 0.28 | 0 | 0 | 0 | not significant |
| 10681 | REACTOME MUCOPOLYSACCHARIDOSES                             | 0.96 | 0.28 | 0 | 0 | 0 | not significant |
| 10682 | REACTOME N GLYCAN TRIMMING IN THE ER AND CALNEXIN CALRETI  | 0.96 | 0.28 | 0 | 0 | 0 | not significant |
| 10683 | WATANABE ULCERATIVE COLITIS WITH CANCER UP                 | 0.96 | 0.28 | 0 | 0 | 0 | not significant |
| 10684 | CAMP_UP.V1_DN                                              | 0.96 | 0.27 | 0 | 0 | 0 | not significant |
| 10685 | CHR20Q13                                                   | 0.96 | 0.27 | 0 | 0 | 0 | not significant |
| 10686 | GO DNA DAMAGE RESPONSE SIGNAL TRANSDUCTION BY P53 CLASS    | 0.96 | 0.27 | 0 | 0 | 0 | not significant |
| 10687 | GO ENDOCRINE SYSTEM DEVELOPMENT                            | 0.96 | 0.27 | 0 | 0 | 0 | not significant |
| 10688 | GO GLUCURONOSYLTRANSFERASE ACTIVITY                        | 0.96 | 0.27 | 0 | 0 | 0 | not significant |
| 10689 | GO LEUCINE ZIPPER DOMAIN BINDING                           | 0.96 | 0.27 | 0 | 0 | 0 | not significant |
| 10690 | GO NEGATIVE REGULATION OF NEURON PROJECTION REGENERATION   | 0.96 | 0.27 | 0 | 0 | 0 | not significant |
| 10691 | GO REGULATION OF ICOSANOID SECRETION                       | 0.96 | 0.27 | 0 | 0 | 0 | not significant |
| 10692 | GO REGULATION OF JUN KINASE ACTIVITY                       | 0.96 | 0.27 | 0 | 0 | 0 | not significant |
| 10693 | GO REGULATION OF TOLL LIKE RECEPTOR 2 SIGNALING PATHWAY    | 0.96 | 0.27 | 0 | 0 | 0 | not significant |
| 10694 | GO SYMPATHETIC NERVOUS SYSTEM DEVELOPMENT                  | 0.96 | 0.27 | 0 | 0 | 0 | not significant |
| 10695 | HALLMARK INTERFERON ALPHA RESPONSE                         | 0.96 | 0.27 | 0 | 0 | 0 | not significant |
| 10696 | HECKER_IFNB1_TARGETS                                       | 0.96 | 0.27 | 0 | 0 | 0 | not significant |
| 10697 | KEGG ARRHYTHMOGENIC RIGHT VENTRICULAR CARDIOMYOPATHY AF    | 0.96 | 0.27 | 0 | 0 | 0 | not significant |
| 10698 | REACTOME DEX_H_BOX_HELICASES_ACTIVATE_TYPE_1_IFN_AND_INFLA | 0.96 | 0.27 | 0 | 0 | 0 | not significant |
| 10699 | REACTOME EXTRACELLULAR MATRIX ORGANIZATION                 | 0.96 | 0.27 | 0 | 0 | 0 | not significant |
| 10700 | BIOCARTA_PS1_PATHWAY                                       | 0.96 | 0.26 | 0 | 0 | 0 | not significant |
| 10701 | GO NEGATIVE REGULATION OF GLYCOGEN METABOLIC PROCESS       | 0.96 | 0.26 | 0 | 0 | 0 | not significant |
| 10702 | SCHIEDERIT_IKK_INTERACTING_PROTEINS                        | 0.96 | 0.26 | 0 | 0 | 0 | not significant |
| 10703 | GO RECEPTOR ANTAGONIST ACTIVITY                            | 0.96 | 0.25 | 0 | 0 | 0 | not significant |
| 10704 | JOHNSTONE_PARVB_TARGETS_3_UP                               | 0.96 | 0.25 | 0 | 0 | 0 | not significant |
| 10705 | MULLIGHAN_MLL_SIGNATURE_2_DN                               | 0.96 | 0.25 | 0 | 0 | 0 | not significant |
| 10706 | GO CELL CYCLE ARREST                                       | 0.96 | 0.23 | 0 | 0 | 0 | not significant |
| 10707 | ENK_UV_RESPONSE_EPIDERMIS_DN                               | 0.96 | 0.22 | 0 | 0 | 0 | not significant |
| 10708 | GO EMBRYO DEVELOPMENT ENDING IN BIRTH OR EGG HATCHING      | 0.96 | 0.22 | 0 | 0 | 0 | not significant |
| 10709 | GO CELL JUNCTION                                           | 0.96 | 0.20 | 0 | 0 | 0 | not significant |
| 10710 | GO LOCOMOTION                                              | 0.96 | 0.20 | 0 | 0 | 0 | not significant |
| 10711 | GO MRNA TRANSCRIPTION BY RNA POLYMERASE II                 | 0.97 | 0.33 | 0 | 0 | 0 | not significant |
| 10712 | BIOCARTA_EGF_PATHWAY                                       | 0.97 | 0.32 | 0 | 0 | 0 | not significant |
| 10713 | GO_3_5_RNA_HELICASE_ACTIVITY                               | 0.97 | 0.32 | 0 | 0 | 0 | not significant |
| 10714 | GO POSITIVE REGULATION OF B CELL MEDIATED IMMUNITY         | 0.97 | 0.32 | 0 | 0 | 0 | not significant |
| 10715 | RAMALHO_STEMNESS_DN                                        | 0.97 | 0.32 | 0 | 0 | 0 | not significant |
| 10716 | REACTOME REGULATION OF IFNA SIGNALING                      | 0.97 | 0.32 | 0 | 0 | 0 | not significant |
| 10717 | GO KERATAN SULFATE BIOSYNTHETIC PROCESS                    | 0.97 | 0.31 | 0 | 0 | 0 | not significant |
| 10718 | GO POSITIVE REGULATION OF DEFENSE RESPONSE TO VIRUS BY H   | 0.97 | 0.31 | 0 | 0 | 0 | not significant |
| 10719 | GO REGULATION OF PROTEIN HOMOLOGOMERIZATION                | 0.97 | 0.31 | 0 | 0 | 0 | not significant |
| 10720 | KEGG GLYCEROLIPID METABOLISM                               | 0.97 | 0.31 | 0 | 0 | 0 | not significant |
| 10721 | MARIADASON_RESPONSE_TO_BUTYRATE_SULINDAC_6                 | 0.97 | 0.31 | 0 | 0 | 0 | not significant |
| 10722 | PRC2_SUZ12_UP.V1_DN                                        | 0.97 | 0.31 | 0 | 0 | 0 | not significant |
| 10723 | YOSHIOKA_LIVER_CANCER_EARLY_RECURRENCE_UP                  | 0.97 | 0.31 | 0 | 0 | 0 | not significant |
| 10724 | BIOCARTA_WNT_PATHWAY                                       | 0.97 | 0.30 | 0 | 0 | 0 | not significant |
| 10725 | GO ASTER                                                   | 0.97 | 0.30 | 0 | 0 | 0 | not significant |
| 10726 | GO CARDIAC MUSCLE CELL CONTRACTION                         | 0.97 | 0.30 | 0 | 0 | 0 | not significant |
| 10727 | GO GLIAL CELL DIFFERENTIATION                              | 0.97 | 0.30 | 0 | 0 | 0 | not significant |
| 10728 | GO GROWTH CONE PART                                        | 0.97 | 0.30 | 0 | 0 | 0 | not significant |
| 10729 | GO NEGATIVE REGULATION OF CLILUM ASSEMBLY                  | 0.97 | 0.30 | 0 | 0 | 0 | not significant |
| 10730 | GO NEGATIVE REGULATION OF TISSUE REMODELING                | 0.97 | 0.30 | 0 | 0 | 0 | not significant |
| 10731 | GO NEUROEPITHELIAL CELL DIFFERENTIATION                    | 0.97 | 0.30 | 0 | 0 | 0 | not significant |
| 10732 | GO PROTEIN IMPORT INTO PEROXISOME MATRIX                   | 0.97 | 0.30 | 0 | 0 | 0 | not significant |
| 10733 | GO REGULATION OF IMMUNOGLOBULIN PRODUCTION                 | 0.97 | 0.30 | 0 | 0 | 0 | not significant |
| 10734 | GO TRANSLATION PREINITIATION COMPLEX                       | 0.97 | 0.30 | 0 | 0 | 0 | not significant |
| 10735 | GO TRIGLYCERIDE CATABOLIC PROCESS                          | 0.97 | 0.30 | 0 | 0 | 0 | not significant |
| 10736 | KASLER_HDAC7_TARGETS_1_DN                                  | 0.97 | 0.30 | 0 | 0 | 0 | not significant |
| 10737 | MATZUK SPERMATOCYTE                                        | 0.97 | 0.30 | 0 | 0 | 0 | not significant |
| 10738 | NABA_COLLAGENS                                             | 0.97 | 0.30 | 0 | 0 | 0 | not significant |
| 10739 | PID_LPA4_PATHWAY                                           | 0.97 | 0.30 | 0 | 0 | 0 | not significant |
| 10740 | CHR22Q11                                                   | 0.97 | 0.29 | 0 | 0 | 0 | not significant |
| 10741 | FAELT_B_CELL_WITH_VH3_21_DN                                | 0.97 | 0.29 | 0 | 0 | 0 | not significant |
| 10742 | GO_3_5_EXODEOXYRIBONUCLEASE_ACTIVITY                       | 0.97 | 0.29 | 0 | 0 | 0 | not significant |
| 10743 | GO ACTIN NUCLEATION                                        | 0.97 | 0.29 | 0 | 0 | 0 | not significant |
| 10744 | GO AROMATIC AMINO ACID TRANSPORT                           | 0.97 | 0.29 | 0 | 0 | 0 | not significant |
| 10745 | GO CARBOHYDRATE DERIVATIVE CATABOLIC PROCESS               | 0.97 | 0.29 | 0 | 0 | 0 | not significant |
| 10746 | GO DERLIN_1_RETROTRANSLOCATION_COMPLEX                     | 0.97 | 0.29 | 0 | 0 | 0 | not significant |
| 10747 | GO EQUATORIAL MICROTUBULE ORGANIZING CENTER                | 0.97 | 0.29 | 0 | 0 | 0 | not significant |
| 10748 | GO GTPASE ACTIVATING PROTEIN BINDING                       | 0.97 | 0.29 | 0 | 0 | 0 | not significant |
| 10749 | GO HISTONE_H3_K9_ACETYLATION                               | 0.97 | 0.29 | 0 | 0 | 0 | not significant |
| 10750 | GO POSITIVE REGULATION OF LEUKOCYTE MEDIATED IMMUNITY      | 0.97 | 0.29 | 0 | 0 | 0 | not significant |
| 10751 | GO REGULATION OF B CELL PROLIFERATION                      | 0.97 | 0.29 | 0 | 0 | 0 | not significant |
| 10752 | GO REGULATION OF OSTEOCLAST DIFFERENTIATION                | 0.97 | 0.29 | 0 | 0 | 0 | not significant |
| 10753 | GO SINGLE STRANDED DNA EXODEOXYRIBONUCLEASE_ACTIVITY       | 0.97 | 0.29 | 0 | 0 | 0 | not significant |
| 10754 | LINDSTEDT_DENDRITIC_CELL_MATURATION_C                      | 0.97 | 0.29 | 0 | 0 | 0 | not significant |
| 10755 | MIKKELSEN_IPS_LCP_WITH_H3K4ME3                             | 0.97 | 0.29 | 0 | 0 | 0 | not significant |
| 10756 | NRL_DN.V1_UP                                               | 0.97 | 0.29 | 0 | 0 | 0 | not significant |
| 10757 | REACTOME HDR_THROUGH_MMEJ_ALT_NHEJ                         | 0.97 | 0.29 | 0 | 0 | 0 | not significant |
| 10758 | SHEH_LIVER_CANCER_VS_TXNP_LOSS_PAM5                        | 0.97 | 0.29 | 0 | 0 | 0 | not significant |
| 10759 | FRASOR_RESPONSE_TO_ESTRADIOL_DN                            | 0.97 | 0.28 | 0 | 0 | 0 | not significant |
| 10760 | GO CARDIAC EPITHELIAL TO MESENCHYMAL TRANSITION            | 0.97 | 0.28 | 0 | 0 | 0 | not significant |
| 10761 | GO NEGATIVE REGULATION OF AUTOPHAGY OF MITOCHONDRION       | 0.97 | 0.28 | 0 | 0 | 0 | not significant |
| 10762 | GO REGULATION OF CELLULAR CARBOHYDRATE CATABOLIC PROCE     | 0.97 | 0.28 | 0 | 0 | 0 | not significant |
| 10763 | HAN_SATB1_TARGETS_DN                                       | 0.97 | 0.28 | 0 | 0 | 0 | not significant |
| 10764 | IWANAGA_CARCINOGENESIS_BY_KRAS_PTEN_DN                     | 0.97 | 0.28 | 0 | 0 | 0 | not significant |
| 10765 | KEGG_TASTE_TRANSDUCTION                                    | 0.97 | 0.28 | 0 | 0 | 0 | not significant |
| 10766 | REACTOME GLYCEROPHOSPHOLIPID BIOSYNTHESIS                  | 0.97 | 0.28 | 0 | 0 | 0 | not significant |
| 10767 | SMIRNOV_RESPONSE_TO_IR_2HR_DN                              | 0.97 | 0.28 | 0 | 0 | 0 | not significant |
| 10768 | VANTVEER_BREAST_CANCER_BRCA1_DN                            | 0.97 | 0.28 | 0 | 0 | 0 | not significant |
| 10769 | GO BETA_2_MICROGLOBULIN_BINDING                            | 0.97 | 0.27 | 0 | 0 | 0 | not significant |
| 10770 | GO TAXIS                                                   | 0.97 | 0.27 | 0 | 0 | 0 | not significant |
| 10771 | ZHENG_FOXP3_TARGETS_IN_THYMUS_UP                           | 0.97 | 0.27 | 0 | 0 | 0 | not significant |
| 10772 | GRESHOCK_CANCER_COPY_NUMBER_UP                             | 0.97 | 0.26 | 0 | 0 | 0 | not significant |
| 10773 | GO_CELL_MORPHOGENESIS_INVOLVED_IN_NEURON_DIFFERENTIATION   | 0.97 | 0.24 | 0 | 0 | 0 | not significant |
| 10774 | GO ION HOMEOSTASIS                                         | 0.97 | 0.24 | 0 | 0 | 0 | not significant |
| 10775 | GO MULTI ORGANISM REPRODUCTIVE PROCESS                     | 0.97 | 0.24 | 0 | 0 | 0 | not significant |
| 10776 | HALLMARK_WNT_BETA_CATENIN_SIGNALING                        | 0.98 | 0.34 | 0 | 0 | 0 | not significant |
| 10777 | DING_LUNG_CANCER_BY_MUTATION_RATE                          | 0.98 | 0.33 | 0 | 0 | 0 | not significant |
| 10778 | GO LIGAND GATED ION CHANNEL ACTIVITY                       | 0.98 | 0.33 | 0 | 0 | 0 | not significant |
| 10779 | PID_GMCSF_PATHWAY                                          | 0.98 | 0.33 | 0 | 0 | 0 | not significant |

|       |                                                                      |      |      |   |   |   |                 |
|-------|----------------------------------------------------------------------|------|------|---|---|---|-----------------|
| 10780 | BIOCARTA_IL4_PATHWAY                                                 | 0.98 | 0.32 | 0 | 0 | 0 | not significant |
| 10781 | GO_FIBROBLAST_APOPTOTIC_PROCESS                                      | 0.98 | 0.32 | 0 | 0 | 0 | not significant |
| 10782 | GO_INTERLEUKIN_5_PRODUCTION                                          | 0.98 | 0.32 | 0 | 0 | 0 | not significant |
| 10783 | GO_PHOSPHORIC_DIESTER_HYDROLASE_ACTIVITY                             | 0.98 | 0.32 | 0 | 0 | 0 | not significant |
| 10784 | GO_POSITIVE_REGULATION_OF_B_CELL_PROLIFERATION                       | 0.98 | 0.32 | 0 | 0 | 0 | not significant |
| 10785 | GO_POSITIVE_REGULATION_OF_DNA_RECOMBINATION                          | 0.98 | 0.32 | 0 | 0 | 0 | not significant |
| 10786 | GO_POST_EMBRYONIC_ANIMAL_MORPHOGENESIS                               | 0.98 | 0.32 | 0 | 0 | 0 | not significant |
| 10787 | GO_REGULATION_OF_GONAD_DEVELOPMENT                                   | 0.98 | 0.32 | 0 | 0 | 0 | not significant |
| 10788 | GO_XY_BODY                                                           | 0.98 | 0.32 | 0 | 0 | 0 | not significant |
| 10789 | LEE_LIVER_CANCER_CIPROFIBRATE_UP                                     | 0.98 | 0.32 | 0 | 0 | 0 | not significant |
| 10790 | BASSO_CD40_SIGNALING_UP                                              | 0.98 | 0.31 | 0 | 0 | 0 | not significant |
| 10791 | DURAND_STROMA_NS_UP                                                  | 0.98 | 0.31 | 0 | 0 | 0 | not significant |
| 10792 | GO_DETECTION_OF_MECHANICAL_STIMULUS                                  | 0.98 | 0.31 | 0 | 0 | 0 | not significant |
| 10793 | GO_NEGATIVE_REGULATION_OF_SMOOTH_MUSCLE_CELL_PROLIFERATION           | 0.98 | 0.31 | 0 | 0 | 0 | not significant |
| 10794 | GO_PHOSPHOLIPID_METABOLIC_PROCESS                                    | 0.98 | 0.31 | 0 | 0 | 0 | not significant |
| 10795 | GO_POSITIVE_REGULATION_OF_DENDRITIC_SPINE_DEVELOPMENT                | 0.98 | 0.31 | 0 | 0 | 0 | not significant |
| 10796 | GO_POSITIVE_REGULATION_OF_NATURAL_KILLER_CELL_MEDIATED_IMMUNITY      | 0.98 | 0.31 | 0 | 0 | 0 | not significant |
| 10797 | GO_PRESYNAPTIC_MEMBRANE_ORGANIZATION                                 | 0.98 | 0.31 | 0 | 0 | 0 | not significant |
| 10798 | GO_PYRIMIDINE_DIMER_REPAIR                                           | 0.98 | 0.31 | 0 | 0 | 0 | not significant |
| 10799 | GO_SYNCYTIUM_FORMATION                                               | 0.98 | 0.31 | 0 | 0 | 0 | not significant |
| 10800 | GO_TERPENOID_BIOSYNTHETIC_PROCESS                                    | 0.98 | 0.31 | 0 | 0 | 0 | not significant |
| 10801 | GO_VENTRICULAR TRABECULA_MYOCARDIUM_MORPHOGENESIS                    | 0.98 | 0.31 | 0 | 0 | 0 | not significant |
| 10802 | KONDO_EZH2_TARGETS                                                   | 0.98 | 0.31 | 0 | 0 | 0 | not significant |
| 10803 | LOPEZ_TRANSLATION_VIA_FN1_SIGNALING                                  | 0.98 | 0.31 | 0 | 0 | 0 | not significant |
| 10804 | PRC1_BMI_UP.V1_UP                                                    | 0.98 | 0.31 | 0 | 0 | 0 | not significant |
| 10805 | REACTOME_NETRIN_1_SIGNALING                                          | 0.98 | 0.31 | 0 | 0 | 0 | not significant |
| 10806 | VART_KSHV_INFECTION_ANGIOGENIC_MARKERS_DN                            | 0.98 | 0.31 | 0 | 0 | 0 | not significant |
| 10807 | WATTEL_AUTONOMOUS_THYROID_ADENOMA_DN                                 | 0.98 | 0.31 | 0 | 0 | 0 | not significant |
| 10808 | BIOCARTA_CFTR_PATHWAY                                                | 0.98 | 0.30 | 0 | 0 | 0 | not significant |
| 10809 | FAELT_B_CELL_WITH_VH_REARRANGEMENTS_UP                               | 0.98 | 0.30 | 0 | 0 | 0 | not significant |
| 10810 | GO_ACTIVATION_OF_JUN_KINASE_ACTIVITY                                 | 0.98 | 0.30 | 0 | 0 | 0 | not significant |
| 10811 | GO_CALCIIUM_ACTIVATED_POTASSIUM_CHANNEL_ACTIVITY                     | 0.98 | 0.30 | 0 | 0 | 0 | not significant |
| 10812 | GO_CALCIIUM_ION_TRANSMEMBRANE_TRANSPORTER_ACTIVITY                   | 0.98 | 0.30 | 0 | 0 | 0 | not significant |
| 10813 | GO_DETECTION_OF_STIMULUS                                             | 0.98 | 0.30 | 0 | 0 | 0 | not significant |
| 10814 | GO_EXECUTION_PHASE_OF_APOPTOSIS                                      | 0.98 | 0.30 | 0 | 0 | 0 | not significant |
| 10815 | GO_EXTRACELLULAR_MATRIX_STRUCTURAL_CONSTITUENT_CONFERRING_PROPERTIES | 0.98 | 0.30 | 0 | 0 | 0 | not significant |
| 10816 | GO_NEGATIVE_REGULATION_OF_POTASSIUM_ION_TRANSPORT                    | 0.98 | 0.30 | 0 | 0 | 0 | not significant |
| 10817 | GO_NEGATIVE_REGULATION_OF_PROTEIN_POLYMERIZATION                     | 0.98 | 0.30 | 0 | 0 | 0 | not significant |
| 10818 | GO_NEGATIVE_REGULATION_OF_VASCULAR_SMOOTH_MUSCLE_CELL_FUNCTION       | 0.98 | 0.30 | 0 | 0 | 0 | not significant |
| 10819 | GO_NODAL_SIGNALING_PATHWAY                                           | 0.98 | 0.30 | 0 | 0 | 0 | not significant |
| 10820 | GO_POSITIVE_REGULATION_OF_NEURON_APOPTOTIC_PROCESS                   | 0.98 | 0.30 | 0 | 0 | 0 | not significant |
| 10821 | GO_REGULATION_OF_DNA_DEPENDENT_DNA_REPLICATION_INITIATION            | 0.98 | 0.30 | 0 | 0 | 0 | not significant |
| 10822 | GO_REGULATION_OF_SKELETAL_MUSCLE_CONTRACTION                         | 0.98 | 0.30 | 0 | 0 | 0 | not significant |
| 10823 | GO_RETINA_LAYER_FORMATION                                            | 0.98 | 0.30 | 0 | 0 | 0 | not significant |
| 10824 | GO_SODIUM_BICARBONATE_SYMPORTER_ACTIVITY                             | 0.98 | 0.30 | 0 | 0 | 0 | not significant |
| 10825 | GO_VITAMIN_CATABOLIC_PROCESS                                         | 0.98 | 0.30 | 0 | 0 | 0 | not significant |
| 10826 | HALLMARK_APICAL_SURFACE                                              | 0.98 | 0.30 | 0 | 0 | 0 | not significant |
| 10827 | LEIN_ASTROCYTE_MARKERS                                               | 0.98 | 0.30 | 0 | 0 | 0 | not significant |
| 10828 | LINDGREN_BLADDER_CANCER_CLUSTER_2B                                   | 0.98 | 0.30 | 0 | 0 | 0 | not significant |
| 10829 | MARTIN_VIRAL_GPCR_SIGNALING_DN                                       | 0.98 | 0.30 | 0 | 0 | 0 | not significant |
| 10830 | PID_REG_GR_PATHWAY                                                   | 0.98 | 0.30 | 0 | 0 | 0 | not significant |
| 10831 | RAPA_EARLY_UP.V1_UP                                                  | 0.98 | 0.30 | 0 | 0 | 0 | not significant |
| 10832 | REACTOME_SYNTHESIS_OF_LEUKOTRIENES_LT_AND_EOXINS_EX                  | 0.98 | 0.30 | 0 | 0 | 0 | not significant |
| 10833 | REACTOME_TICAM1_TRAF6_DEPENDENT_INDUCTION_OF_TAK1_COMPLEX            | 0.98 | 0.30 | 0 | 0 | 0 | not significant |
| 10834 | ZHOU_INFLAMMATORY_RESPONSE_FIMA_DN                                   | 0.98 | 0.30 | 0 | 0 | 0 | not significant |
| 10835 | GO_CHROMAFFIN GRANULE MEMBRANE                                       | 0.98 | 0.29 | 0 | 0 | 0 | not significant |
| 10836 | GO_CORECEPTOR_ACTIVITY_INVOLVED_IN_WNT_SIGNALING_PATHWAY             | 0.98 | 0.29 | 0 | 0 | 0 | not significant |
| 10837 | GO_G_PROTEIN_COUPLED_RECEPTOR_SIGNALING_PATHWAY                      | 0.98 | 0.29 | 0 | 0 | 0 | not significant |
| 10838 | GO_NEGATIVE_REGULATION_OF_MITOPHAGY                                  | 0.98 | 0.29 | 0 | 0 | 0 | not significant |
| 10839 | KREPEL_CD99_TARGETS_DN                                               | 0.98 | 0.29 | 0 | 0 | 0 | not significant |
| 10840 | NAKAMURA_ADIPOGENESIS_LATE_DN                                        | 0.98 | 0.29 | 0 | 0 | 0 | not significant |
| 10841 | SANA_TNF_SIGNALING_DN                                                | 0.98 | 0.29 | 0 | 0 | 0 | not significant |
| 10842 | SU_THYMUS                                                            | 0.98 | 0.29 | 0 | 0 | 0 | not significant |
| 10843 | CAFFAREL_RESPONSE_TO_THC_24HR_3_UP                                   | 0.98 | 0.28 | 0 | 0 | 0 | not significant |
| 10844 | GO_HISTONE_BINDING                                                   | 0.98 | 0.28 | 0 | 0 | 0 | not significant |
| 10845 | GO_IMMUNE_SYSTEM_DEVELOPMENT                                         | 0.98 | 0.28 | 0 | 0 | 0 | not significant |
| 10846 | GO_LIPID_GLYCOSYLATION                                               | 0.98 | 0.28 | 0 | 0 | 0 | not significant |
| 10847 | GO_METAL_ION_HOMEOSTASIS                                             | 0.98 | 0.28 | 0 | 0 | 0 | not significant |
| 10848 | GO_MRNA_SPLICE_SITE_SELECTION                                        | 0.98 | 0.28 | 0 | 0 | 0 | not significant |
| 10849 | FEVR_CTNNB1_TARGETS_UP                                               | 0.98 | 0.26 | 0 | 0 | 0 | not significant |
| 10850 | CHR12Q12                                                             | 0.99 | 0.35 | 0 | 0 | 0 | not significant |
| 10851 | GO_POSTSYNAPSE_ORGANIZATION                                          | 0.99 | 0.35 | 0 | 0 | 0 | not significant |
| 10852 | GO_CELL_MATRIX_ADHESION                                              | 0.99 | 0.34 | 0 | 0 | 0 | not significant |
| 10853 | GO_NEGATIVE_REGULATION_OF_GLYCOPROTEIN_BIOSYNTHETIC_PROCESS          | 0.99 | 0.34 | 0 | 0 | 0 | not significant |
| 10854 | GO_PHOSPHOLIPID_TRANSPORTER_ACTIVITY                                 | 0.99 | 0.34 | 0 | 0 | 0 | not significant |
| 10855 | GO_REGULATION_OF_CD4_POSITIVE_ALPHA_BETA_T_CELL_ACTIVATION           | 0.99 | 0.34 | 0 | 0 | 0 | not significant |
| 10856 | GO_SPROUTING_ANGIOGENESIS                                            | 0.99 | 0.34 | 0 | 0 | 0 | not significant |
| 10857 | CHEBOTAEV_GR_TARGETS_DN                                              | 0.99 | 0.33 | 0 | 0 | 0 | not significant |
| 10858 | GO_DEOXYRIBONUCLEASE_ACTIVITY                                        | 0.99 | 0.33 | 0 | 0 | 0 | not significant |
| 10859 | GO_MAP_KINASE_KINASE_KINASE_ACTIVITY                                 | 0.99 | 0.33 | 0 | 0 | 0 | not significant |
| 10860 | GO_NON_MOTILE_CILIUM_ASSEMBLY                                        | 0.99 | 0.33 | 0 | 0 | 0 | not significant |
| 10861 | GO_POSITIVE_REGULATION_OF_NF_KAPPAB_TRANSCRIPTION_FACTOR_ACTIVITY    | 0.99 | 0.33 | 0 | 0 | 0 | not significant |
| 10862 | GO_STEROL_BINDING                                                    | 0.99 | 0.33 | 0 | 0 | 0 | not significant |
| 10863 | KANG_AR_TARGETS_DN                                                   | 0.99 | 0.33 | 0 | 0 | 0 | not significant |
| 10864 | REACTOME_RUNX2_REGULATES_BONE_DEVELOPMENT                            | 0.99 | 0.33 | 0 | 0 | 0 | not significant |
| 10865 | SENGUPTA_EBN1_ANTI_CORRELATED                                        | 0.99 | 0.33 | 0 | 0 | 0 | not significant |
| 10866 | ATF2_S_UP.V1_DN                                                      | 0.99 | 0.32 | 0 | 0 | 0 | not significant |
| 10867 | BIOCARTA_IFNA_PATHWAY                                                | 0.99 | 0.32 | 0 | 0 | 0 | not significant |
| 10868 | BIOCARTA_SKP2E2F_PATHWAY                                             | 0.99 | 0.32 | 0 | 0 | 0 | not significant |
| 10869 | CHR16Q22                                                             | 0.99 | 0.32 | 0 | 0 | 0 | not significant |
| 10870 | CHR9P13                                                              | 0.99 | 0.32 | 0 | 0 | 0 | not significant |
| 10871 | GO_ACTIN_POLYMERIZATION_OR_DEPOLYMERIZATION                          | 0.99 | 0.32 | 0 | 0 | 0 | not significant |
| 10872 | GO_NEGATIVE_REGULATION_OF_PRODUCTION_OF_MOLECULAR_MEDIA              | 0.99 | 0.32 | 0 | 0 | 0 | not significant |
| 10873 | GO_POSITIVE_REGULATION_OF_FATTY_ACID_TRANSPORT                       | 0.99 | 0.32 | 0 | 0 | 0 | not significant |
| 10874 | GO_POSTSYNAPTIC_SPECIALIZATION_ASSEMBLY                              | 0.99 | 0.32 | 0 | 0 | 0 | not significant |
| 10875 | GO_RETINA_DEVELOPMENT_IN_CAMERA_TYPE_EYE                             | 0.99 | 0.32 | 0 | 0 | 0 | not significant |
| 10876 | GO_VACUOLAR_MEMBRANE                                                 | 0.99 | 0.32 | 0 | 0 | 0 | not significant |
| 10877 | HOWLIN_CITED1_TARGETS_1_UP                                           | 0.99 | 0.32 | 0 | 0 | 0 | not significant |
| 10878 | HUMMERICH_MALIGNANT_SKIN_TUMOR_UP                                    | 0.99 | 0.32 | 0 | 0 | 0 | not significant |
| 10879 | KEGG_FC_EPSILON_RI_SIGNALING_PATHWAY                                 | 0.99 | 0.32 | 0 | 0 | 0 | not significant |
| 10880 | PARK_APL_PATHOGENESIS_DN                                             | 0.99 | 0.32 | 0 | 0 | 0 | not significant |
| 10881 | REACTOME_ER_QUALITY_CONTROL_COMPARTMENT_ERQC                         | 0.99 | 0.32 | 0 | 0 | 0 | not significant |
| 10882 | REACTOME_KERATAN_SULFATE_BIOSYNTHESIS                                | 0.99 | 0.32 | 0 | 0 | 0 | not significant |
| 10883 | TAKEDA_TARGETS_OF_NUP98_HOX9_FUSION_16D_UP                           | 0.99 | 0.32 | 0 | 0 | 0 | not significant |
| 10884 | WHITESIDE_CISPLATIN_RESISTANCE_DN                                    | 0.99 | 0.32 | 0 | 0 | 0 | not significant |
| 10885 | WONG_IFNA2_RESISTANCE_DN                                             | 0.99 | 0.32 | 0 | 0 | 0 | not significant |
| 10886 | ZHANG_TLX_TARGETS_36HR_UP                                            | 0.99 | 0.32 | 0 | 0 | 0 | not significant |
| 10887 | BIOCARTA_ACH_PATHWAY                                                 | 0.99 | 0.31 | 0 | 0 | 0 | not significant |
| 10888 | GO_ESTABLISHMENT_OF_SISTER_CHROMATID_COHESION                        | 0.99 | 0.31 | 0 | 0 | 0 | not significant |

|       |                                                           |      |      |   |   |   |                 |
|-------|-----------------------------------------------------------|------|------|---|---|---|-----------------|
| 10889 | GO_LEUKOTRIENE_METABOLIC_PROCESS                          | 0.99 | 0.31 | 0 | 0 | 0 | not significant |
| 10890 | GO_MICROTUBULE_NUCLEATION_BY_INTERPHASE_MICROTUBULE_ORG/  | 0.99 | 0.31 | 0 | 0 | 0 | not significant |
| 10891 | GO_NEGATIVE_REGULATION_OF_METALLOPEPTIDASE_ACTIVITY       | 0.99 | 0.31 | 0 | 0 | 0 | not significant |
| 10892 | GO_POSITIVE_REGULATION_OF_ACTIVATED_T_CELL_PROLIFERATION  | 0.99 | 0.31 | 0 | 0 | 0 | not significant |
| 10893 | GO_POSITIVE_REGULATION_OF_VASOCONSTRICTION                | 0.99 | 0.31 | 0 | 0 | 0 | not significant |
| 10894 | GO_PROTEIN_KINASE_COMPLEX                                 | 0.99 | 0.31 | 0 | 0 | 0 | not significant |
| 10895 | GO_REGULATION_OF_DEVELOPMENTAL_PIGMENTATION               | 0.99 | 0.31 | 0 | 0 | 0 | not significant |
| 10896 | GO_REGULATION_OF_RESPONSE_TO_EXTERNAL_STIMULUS            | 0.99 | 0.31 | 0 | 0 | 0 | not significant |
| 10897 | GO_REGULATION_OF_SPHINGOLIPID_BIOSYNTHETIC_PROCESS        | 0.99 | 0.31 | 0 | 0 | 0 | not significant |
| 10898 | GO_REGULATION_OF_TOLL_LIKE_RECEPTOR_3_SIGNALING_PATHWAY   | 0.99 | 0.31 | 0 | 0 | 0 | not significant |
| 10899 | REACTOME_CALNEXIN_CALRETICULIN_CYCLE                      | 0.99 | 0.31 | 0 | 0 | 0 | not significant |
| 10900 | REACTOME_SEMA4D_MEDIATED_INHIBITION_OF_CELL_ATTACHMENT_A/ | 0.99 | 0.31 | 0 | 0 | 0 | not significant |
| 10901 | GO_BASIC_AMINO_ACID_TRANSPORT                             | 0.99 | 0.30 | 0 | 0 | 0 | not significant |
| 10902 | GO_POSITIVE_REGULATION_OF_CENTRIOLE_REPLICATION           | 0.99 | 0.30 | 0 | 0 | 0 | not significant |
| 10903 | GO_REGULATION_OF_CELL_POPULATION_PROLIFERATION            | 0.99 | 0.30 | 0 | 0 | 0 | not significant |
| 10904 | GO_REGULATION_OF_HISTONE_H3_K9_ACETYLATION                | 0.99 | 0.30 | 0 | 0 | 0 | not significant |
| 10905 | MARIADASON_RESPONSE_TO_BUTYRATE_CURCUMIN_SULINDAC_TSA_2   | 0.99 | 0.30 | 0 | 0 | 0 | not significant |
| 10906 | MCDOWELL_ACUTE_LUNG_INJURY_DN                             | 0.99 | 0.30 | 0 | 0 | 0 | not significant |
| 10907 | REACTOME_AXON_GUIDANCE                                    | 0.99 | 0.30 | 0 | 0 | 0 | not significant |
| 10908 | REACTOME_NEUROTOXICITY_OF_CLOSTRIDIUM_TOXINS              | 0.99 | 0.30 | 0 | 0 | 0 | not significant |
| 10909 | STARK_BRAIN_22Q11_DELETION                                | 0.99 | 0.30 | 0 | 0 | 0 | not significant |
| 10910 | VEGF_A_UP.V1_UP                                           | 0.99 | 0.30 | 0 | 0 | 0 | not significant |
| 10911 | GO_PROTEIN_O_LINKED_GLYCOSYLATION                         | 0.99 | 0.29 | 0 | 0 | 0 | not significant |
| 10912 | REACTOME_ARYL_HYDROCARBON_RECEPTOR_SIGNALLING             | 0.99 | 0.29 | 0 | 0 | 0 | not significant |
| 10913 | REACTOME_CASPASE_ACTIVATION_VIA_DEPENDENCE_RECEPTORS_IN/  | 0.99 | 0.28 | 0 | 0 | 0 | not significant |
| 10914 | CRX_DN.V1_DN                                              | 1.00 | 0.36 | 0 | 0 | 0 | not significant |
| 10915 | GO_CELLULAR_MODIFIED_AMINO_ACID_METABOLIC_PROCESS         | 1.00 | 0.36 | 0 | 0 | 0 | not significant |
| 10916 | GO_REGULATION_OF_AXONEMESIS                               | 1.00 | 0.36 | 0 | 0 | 0 | not significant |
| 10917 | MIKKELSEN_NPC_HCP_WITH_H3K4ME3_AND_H3K27ME3               | 1.00 | 0.36 | 0 | 0 | 0 | not significant |
| 10918 | BIOCARTA_P27_PATHWAY                                      | 1.00 | 0.35 | 0 | 0 | 0 | not significant |
| 10919 | DOANE_BREAST_CANCER_CLASSES_DN                            | 1.00 | 0.35 | 0 | 0 | 0 | not significant |
| 10920 | GO_ANTIGEN_BINDING                                        | 1.00 | 0.35 | 0 | 0 | 0 | not significant |
| 10921 | GO_C_TERMINAL_PROTEIN_AMINO_ACID_MODIFICATION             | 1.00 | 0.35 | 0 | 0 | 0 | not significant |
| 10922 | GO_MEMBRANE_DEPOLARIZATION                                | 1.00 | 0.35 | 0 | 0 | 0 | not significant |
| 10923 | GO_NEGATIVE_REGULATION_OF_CARBOHYDRATE_METABOLIC_PROCE/   | 1.00 | 0.35 | 0 | 0 | 0 | not significant |
| 10924 | GO_SPERMATID_DIFFERENTIATION                              | 1.00 | 0.35 | 0 | 0 | 0 | not significant |
| 10925 | GO_TRANSCRIPTION_COACTIVATOR_BINDING                      | 1.00 | 0.35 | 0 | 0 | 0 | not significant |
| 10926 | HOLLEMAN_ASParAGINASE_RESISTANCE_B_ALL_DN                 | 1.00 | 0.35 | 0 | 0 | 0 | not significant |
| 10927 | OKAWA_NEUROBLASTOMA_1P36_31_DELETION                      | 1.00 | 0.35 | 0 | 0 | 0 | not significant |
| 10928 | VANTVEER_BREAST_CANCER_ESR1_UP                            | 1.00 | 0.35 | 0 | 0 | 0 | not significant |
| 10929 | YAO_TEMPORAL_RESPONSE_TO_PROGESTERONE_CLUSTER_1           | 1.00 | 0.35 | 0 | 0 | 0 | not significant |
| 10930 | ZWANG_EGF_PERSISTENTLY_DN                                 | 1.00 | 0.35 | 0 | 0 | 0 | not significant |
| 10931 | CHIANG_LIVER_CANCER_SUBCLASS_INTERFERON_DN                | 1.00 | 0.34 | 0 | 0 | 0 | not significant |
| 10932 | CHR1Q22                                                   | 1.00 | 0.34 | 0 | 0 | 0 | not significant |
| 10933 | CHR5Q14                                                   | 1.00 | 0.34 | 0 | 0 | 0 | not significant |
| 10934 | GO_CELL_CELL_ADHESION_MEDIATED_BY_CADHERIN                | 1.00 | 0.34 | 0 | 0 | 0 | not significant |
| 10935 | GO_CELLULAR_ION_HOMEOSTASIS                               | 1.00 | 0.34 | 0 | 0 | 0 | not significant |
| 10936 | GO_DENDRITIC_SHAFT                                        | 1.00 | 0.34 | 0 | 0 | 0 | not significant |
| 10937 | GO_EMBRYONIC_SKELETAL_SYSTEM_DEVELOPMENT                  | 1.00 | 0.34 | 0 | 0 | 0 | not significant |
| 10938 | GO_POSITIVE_REGULATION_OF_MUSCLE_CONTRACTION              | 1.00 | 0.34 | 0 | 0 | 0 | not significant |
| 10939 | GO_PREASSEMBLY_OF_GPI_ANCHOR_IN_ER_MEMBRANE               | 1.00 | 0.34 | 0 | 0 | 0 | not significant |
| 10940 | GO_REGULATION_OF_MAP_KINASE_ACTIVITY                      | 1.00 | 0.34 | 0 | 0 | 0 | not significant |
| 10941 | GO_REGULATION_OF_PROTEIN_COMPLEX_STABILITY                | 1.00 | 0.34 | 0 | 0 | 0 | not significant |
| 10942 | GO_REGULATION_OF_TRANSCRIPTION_FROM_RNA_POLYMERASE_II_PR  | 1.00 | 0.34 | 0 | 0 | 0 | not significant |
| 10943 | GO_RESPONSE_TO_OSMOTIC_STRESS                             | 1.00 | 0.34 | 0 | 0 | 0 | not significant |
| 10944 | GO_SIGNAL_RECOGNITION_PARTICLE                            | 1.00 | 0.34 | 0 | 0 | 0 | not significant |
| 10945 | GO_TRANSITION_METAL_ION_HOMEOSTASIS                       | 1.00 | 0.34 | 0 | 0 | 0 | not significant |
| 10946 | GO_VACUOLAR_ACIDIFICATION                                 | 1.00 | 0.34 | 0 | 0 | 0 | not significant |
| 10947 | HELLER_HDAC_TARGETS_SILENCED_BY_METHYLATION_DN            | 1.00 | 0.34 | 0 | 0 | 0 | not significant |
| 10948 | VANDESLUIS_NORMAL_EMBRYOS_DN                              | 1.00 | 0.34 | 0 | 0 | 0 | not significant |
| 10949 | WAKABAYASHI_ADIPOGENESIS_PPARG_RXRA_BOUND_36HR            | 1.00 | 0.34 | 0 | 0 | 0 | not significant |
| 10950 | YOSHIOKA_LIVER_CANCER_EARLY_RECURRENCE_DN                 | 1.00 | 0.34 | 0 | 0 | 0 | not significant |
| 10951 | AMUNDSON_RESPONSE_TO_ARSENITE                             | 1.00 | 0.33 | 0 | 0 | 0 | not significant |
| 10952 | CADWELL_ATG16L1_TARGETS_UP                                | 1.00 | 0.33 | 0 | 0 | 0 | not significant |
| 10953 | DAZARD_UV_RESPONSE_CLUSTER_G3                             | 1.00 | 0.33 | 0 | 0 | 0 | not significant |
| 10954 | GO_HORMONE_CATABOLIC_PROCESS                              | 1.00 | 0.33 | 0 | 0 | 0 | not significant |
| 10955 | GO_NEGATIVE_REGULATION_OF_CELL_AGING                      | 1.00 | 0.33 | 0 | 0 | 0 | not significant |
| 10956 | GO_OTIC_VESICLE_DEVELOPMENT                               | 1.00 | 0.33 | 0 | 0 | 0 | not significant |
| 10957 | GO_PHOSPHOLIPID_BINDING                                   | 1.00 | 0.33 | 0 | 0 | 0 | not significant |
| 10958 | GO_REGULATION_OF_BONE_REMODELING                          | 1.00 | 0.33 | 0 | 0 | 0 | not significant |
| 10959 | GO_REGULATION_OF_FC_GAMMA_RECEPTOR_SIGNALING_PATHWAY_IN   | 1.00 | 0.33 | 0 | 0 | 0 | not significant |
| 10960 | GO_RHO_PROTEIN_SIGNAL_TRANSDUCTION                        | 1.00 | 0.33 | 0 | 0 | 0 | not significant |
| 10961 | GO_VENTRICULAR_CARDIAC_MUSCLE_CELL_ACTION_POTENTIAL       | 1.00 | 0.33 | 0 | 0 | 0 | not significant |
| 10962 | LIU_CMYB_TARGETS_UP                                       | 1.00 | 0.33 | 0 | 0 | 0 | not significant |
| 10963 | PENG_GlutAMINE_DEPRIVATION_UP                             | 1.00 | 0.33 | 0 | 0 | 0 | not significant |
| 10964 | REACTOME_SIGNALING_BY_RECEPTOR_TYROSINE_KINASES           | 1.00 | 0.33 | 0 | 0 | 0 | not significant |
| 10965 | VALK_AML_CLUSTER_3                                        | 1.00 | 0.33 | 0 | 0 | 0 | not significant |
| 10966 | CAFFAREL_RESPONSE_TO_THC_8HR_5_UP                         | 1.00 | 0.32 | 0 | 0 | 0 | not significant |
| 10967 | GEORGES_TARGETS_OF_MIR192_AND_MIR215                      | 1.00 | 0.32 | 0 | 0 | 0 | not significant |
| 10968 | GO_AXON_EXTENSION                                         | 1.00 | 0.32 | 0 | 0 | 0 | not significant |
| 10969 | GO_BH_DOMAIN_BINDING                                      | 1.00 | 0.32 | 0 | 0 | 0 | not significant |
| 10970 | GO_ESC_E_Z_COMPLEX                                        | 1.00 | 0.32 | 0 | 0 | 0 | not significant |
| 10971 | GO_NEGATIVE_REGULATION_OF_FATTY_ACID_OXIDATION            | 1.00 | 0.32 | 0 | 0 | 0 | not significant |
| 10972 | GO_POSITIVE_REGULATION_OF_EXCITATORY_POSTSYNAPTIC_POTENTI | 1.00 | 0.32 | 0 | 0 | 0 | not significant |
| 10973 | GO_POSITIVE_REGULATION_OF_PROTEIN_COMPLEX_ASSEMBLY        | 1.00 | 0.32 | 0 | 0 | 0 | not significant |
| 10974 | GO_REGULATION_OF_ISOTOPE_SWITCHING                        | 1.00 | 0.32 | 0 | 0 | 0 | not significant |
| 10975 | J1_CARCINOGENESIS_BY_KRAS_AND_STK11_DN                    | 1.00 | 0.32 | 0 | 0 | 0 | not significant |
| 10976 | PEDRIOLI_MIR31_TARGETS_DN                                 | 1.00 | 0.32 | 0 | 0 | 0 | not significant |
| 10977 | REACTOME_DISPLACEMENT_OF_DNA_GLYCOSYLASE_BY_APEX1         | 1.00 | 0.32 | 0 | 0 | 0 | not significant |
| 10978 | GO_INSULIN_LIKE_GROWTH_FACTOR_I_BINDING                   | 1.00 | 0.31 | 0 | 0 | 0 | not significant |
| 10979 | GO_LIPOXYGENASE_PATHWAY                                   | 1.00 | 0.31 | 0 | 0 | 0 | not significant |
| 10980 | GO_POSITIVE_REGULATION_OF_MAST_CELL_ACTIVATION            | 1.00 | 0.31 | 0 | 0 | 0 | not significant |
| 10981 | GO_REGULATION_OF_ANTIGEN_PROCESSING_AND_PRESENTATION      | 1.00 | 0.31 | 0 | 0 | 0 | not significant |
| 10982 | GO_3_PHOSPHOADENOSINE_5_PHOSPHOSULFATE_BINDING            | 1.00 | 0.30 | 0 | 0 | 0 | not significant |
| 10983 | GO_CHROMAFFIN_GRANULE                                     | 1.00 | 0.30 | 0 | 0 | 0 | not significant |
| 10984 | KORKOLA_EMBRYONAL_CARCINOMA                               | 1.00 | 0.28 | 0 | 0 | 0 | not significant |
| 10985 | GO_ESTABLISHMENT_OF_PROTEIN_LOCALIZATION_TO_ORGANELLE     | 1.01 | 0.38 | 0 | 0 | 0 | not significant |
| 10986 | GO_MITOCHONDRIA_ASSOCIATED_ENDOPLASMIC_RETICULUM_MEMBRA   | 1.01 | 0.38 | 0 | 0 | 0 | not significant |
| 10987 | BROWNE_HCMV_INFECTION_24HR_DN                             | 1.01 | 0.37 | 0 | 0 | 0 | not significant |
| 10988 | GO_RAB_PROTEIN_SIGNAL_TRANSDUCTION                        | 1.01 | 0.37 | 0 | 0 | 0 | not significant |
| 10989 | GO_VACUOLAR_TRANSPORT                                     | 1.01 | 0.37 | 0 | 0 | 0 | not significant |
| 10990 | GRAHAM_CML_QUIESCENT_VS_NORMAL_DIVIDING_UP                | 1.01 | 0.37 | 0 | 0 | 0 | not significant |
| 10991 | HATADA_METHYLATED_IN_LUNG_CANCER_UP                       | 1.01 | 0.37 | 0 | 0 | 0 | not significant |
| 10992 | PID_IL23_PATHWAY                                          | 1.01 | 0.37 | 0 | 0 | 0 | not significant |
| 10993 | REACTOME_SMAD2_SMAD3:SMAD4_HETEROTRIMER_REGULATES_TRAN    | 1.01 | 0.37 | 0 | 0 | 0 | not significant |
| 10994 | RUTELLA_RESPONSE_TO_HGF_DN                                | 1.01 | 0.37 | 0 | 0 | 0 | not significant |
| 10995 | VALK_AML_CLUSTER_12                                       | 1.01 | 0.37 | 0 | 0 | 0 | not significant |
| 10996 | BIOCARTA_FBW7_PATHWAY                                     | 1.01 | 0.36 | 0 | 0 | 0 | not significant |
| 10997 | GO_NEGATIVE_REGULATION_OF_PROTEIN_MODIFICATION_BY_SMALL_P | 1.01 | 0.36 | 0 | 0 | 0 | not significant |

|       |                                                            |      |      |   |   |   |                 |
|-------|------------------------------------------------------------|------|------|---|---|---|-----------------|
| 10998 | GO_POSITIVE_REGULATION_OF_JUN_KINASE_ACTIVITY              | 1.01 | 0.36 | 0 | 0 | 0 | not significant |
| 10999 | GO_REGULATION_OF_CELLULAR_COMPONENT_MOVEMENT               | 1.01 | 0.36 | 0 | 0 | 0 | not significant |
| 11000 | RODRIGUES_DCC_TARGETS_DN                                   | 1.01 | 0.36 | 0 | 0 | 0 | not significant |
| 11001 | SNF5_DN.V1_DN                                              | 1.01 | 0.36 | 0 | 0 | 0 | not significant |
| 11002 | URS_ADIPOCYTE_DIFFERENTIATION_DN                           | 1.01 | 0.36 | 0 | 0 | 0 | not significant |
| 11003 | ACEVEDO_LIVER_CANCER_WITH_H3K9ME3_UP                       | 1.01 | 0.35 | 0 | 0 | 0 | not significant |
| 11004 | ESC_V6.5_UP_EARLY.V1_DN                                    | 1.01 | 0.35 | 0 | 0 | 0 | not significant |
| 11005 | GO_CELL_CELL_ADHESION_VIA_PLASMA_MEMBRANE_ADHESION_MOLEC   | 1.01 | 0.35 | 0 | 0 | 0 | not significant |
| 11006 | GO_HISTONE_H3_ACETYLATION                                  | 1.01 | 0.35 | 0 | 0 | 0 | not significant |
| 11007 | GO_HISTONE_METHYLTRANSFERASE_ACTIVITY_H3_K9_SPECIFIC_      | 1.01 | 0.35 | 0 | 0 | 0 | not significant |
| 11008 | GO_HISTONE_METHYLTRANSFERASE_COMPLEX                       | 1.01 | 0.35 | 0 | 0 | 0 | not significant |
| 11009 | GO_INTERLEUKIN_2_PRODUCTION                                | 1.01 | 0.35 | 0 | 0 | 0 | not significant |
| 11010 | GO_LIGAND_GATED_CALCIUM_CHANNEL_ACTIVITY                   | 1.01 | 0.35 | 0 | 0 | 0 | not significant |
| 11011 | GO_LYMPHANGIOGENESIS                                       | 1.01 | 0.35 | 0 | 0 | 0 | not significant |
| 11012 | GO_NEGATIVE_REGULATION_OF_LYMPHOCYTE_DIFFERENTIATION       | 1.01 | 0.35 | 0 | 0 | 0 | not significant |
| 11013 | GO_POSITIVE_REGULATION_OF_TRANSCRIPTION_REGULATORY_REGION  | 1.01 | 0.35 | 0 | 0 | 0 | not significant |
| 11014 | GO_REGULATION_OF_RETROGRADE_PROTEIN_TRANSPORT_ER_TO_C      | 1.01 | 0.35 | 0 | 0 | 0 | not significant |
| 11015 | GO_REPRESSING_TRANSCRIPTION_FACTOR_BINDING                 | 1.01 | 0.35 | 0 | 0 | 0 | not significant |
| 11016 | GO_SYMPORTER_ACTIVITY                                      | 1.01 | 0.35 | 0 | 0 | 0 | not significant |
| 11017 | GO_TYPE_B_PANCREATIC_CELL_DEVELOPMENT                      | 1.01 | 0.35 | 0 | 0 | 0 | not significant |
| 11018 | REACTOME_FOXO_MEDIATED_TRANSCRIPTION_OF_CELL_DEATH_GENE    | 1.01 | 0.35 | 0 | 0 | 0 | not significant |
| 11019 | REACTOME_SUMOYLATION_OF_DNA_METHYLATION_PROTEINS           | 1.01 | 0.35 | 0 | 0 | 0 | not significant |
| 11020 | REACTOME_VEGFR2_MEDIATED_VASCULAR_PERMEABILITY             | 1.01 | 0.35 | 0 | 0 | 0 | not significant |
| 11021 | BIOCARTA_PCAF_PATHWAY                                      | 1.01 | 0.34 | 0 | 0 | 0 | not significant |
| 11022 | GO_ACUTE_INFLAMMATORY_RESPONSE_TO_ANTIAGENIC_STIMULUS      | 1.01 | 0.34 | 0 | 0 | 0 | not significant |
| 11023 | GO_ADULT_LOCOMOTORY_BEHAVIOR                               | 1.01 | 0.34 | 0 | 0 | 0 | not significant |
| 11024 | GO_CEREBELLAR_CORTEX_MORPHOGENESIS                         | 1.01 | 0.34 | 0 | 0 | 0 | not significant |
| 11025 | GO_COHESIN_LOADING                                         | 1.01 | 0.34 | 0 | 0 | 0 | not significant |
| 11026 | GO_DIPEPTIDYL_PEPTIDASE_ACTIVITY                           | 1.01 | 0.34 | 0 | 0 | 0 | not significant |
| 11027 | GO_DNA_DAMAGE_INDUCED_PROTEIN_PHOSPHORYLATION              | 1.01 | 0.34 | 0 | 0 | 0 | not significant |
| 11028 | GO_GLYCEROPHOSPHOLIPID_METABOLIC_PROCESS                   | 1.01 | 0.34 | 0 | 0 | 0 | not significant |
| 11029 | GO_INSULIN_SECRETION_INVOLVED_IN_CELLULAR_RESPONSE_TO_GLU  | 1.01 | 0.34 | 0 | 0 | 0 | not significant |
| 11030 | GO_METANEPHRIC_NEPHRON_DEVELOPMENT                         | 1.01 | 0.34 | 0 | 0 | 0 | not significant |
| 11031 | GO_NEGATIVE_REGULATION_OF_BLOOD_VESSEL_DIAMETER            | 1.01 | 0.34 | 0 | 0 | 0 | not significant |
| 11032 | GO_POSITIVE_REGULATION_OF_DNA_BINDING_TRANSCRIPTION_FACTOR | 1.01 | 0.34 | 0 | 0 | 0 | not significant |
| 11033 | GO_RESPONSE_TO_WATER                                       | 1.01 | 0.34 | 0 | 0 | 0 | not significant |
| 11034 | GO_SYNAPTIC_VESICLE_MEMBRANE                               | 1.01 | 0.34 | 0 | 0 | 0 | not significant |
| 11035 | GO_T_HELPER_2_CELL_DIFFERENTIATION                         | 1.01 | 0.34 | 0 | 0 | 0 | not significant |
| 11036 | GO_TYPE_2_IMMUNE_RESPONSE                                  | 1.01 | 0.34 | 0 | 0 | 0 | not significant |
| 11037 | MEISSNER_NPC_ICP_WITH_H3K4ME3                              | 1.01 | 0.34 | 0 | 0 | 0 | not significant |
| 11038 | PID_IL6_7_PATHWAY                                          | 1.01 | 0.34 | 0 | 0 | 0 | not significant |
| 11039 | REACTOME_NCAM1_INTERACTIONS                                | 1.01 | 0.34 | 0 | 0 | 0 | not significant |
| 11040 | REACTOME_SIGNALING_BY_TYPE_1_INSULIN_LIKE_GROWTH_FACTOR_1  | 1.01 | 0.34 | 0 | 0 | 0 | not significant |
| 11041 | ZHENG_GLIOMASTOMA_PLASTICITY_DN                            | 1.01 | 0.34 | 0 | 0 | 0 | not significant |
| 11042 | BRACHAT_RESPONSE_TO_METHOTREXATE_UP                        | 1.01 | 0.33 | 0 | 0 | 0 | not significant |
| 11043 | GO_CYCLIC_NUCLEOTIDE_BIOSYNTHETIC_PROCESS                  | 1.01 | 0.33 | 0 | 0 | 0 | not significant |
| 11044 | GO_REGULATION_OF_MAMMARY_GLAND_EPITHELIAL_CELL_PROLIFERA   | 1.01 | 0.33 | 0 | 0 | 0 | not significant |
| 11045 | GO_WNT_ACTIVATED_RECEPTOR_ACTIVITY                         | 1.01 | 0.33 | 0 | 0 | 0 | not significant |
| 11046 | LIAN_LIPA_TARGETS_6M                                       | 1.01 | 0.33 | 0 | 0 | 0 | not significant |
| 11047 | MARTIN_NFKB_TARGETS_DN                                     | 1.01 | 0.33 | 0 | 0 | 0 | not significant |
| 11048 | NIKOLSKY_BREAST_CANCER_21Q22_AMPLICON                      | 1.01 | 0.33 | 0 | 0 | 0 | not significant |
| 11049 | PID_INTEGRIN2_PATHWAY                                      | 1.01 | 0.33 | 0 | 0 | 0 | not significant |
| 11050 | GO_CERAMIDE_1_PHOSPHATE_BINDING                            | 1.01 | 0.32 | 0 | 0 | 0 | not significant |
| 11051 | GO_PHOSPHATIDYLINOSITOL_N_ACETYLGUCOSAMINYLTRANSFERASE     | 1.01 | 0.32 | 0 | 0 | 0 | not significant |
| 11052 | GO_REGULATION_OF_INORGANIC_ANION_TRANSMEMBRANE_TRANSPOR    | 1.01 | 0.32 | 0 | 0 | 0 | not significant |
| 11053 | GO_NEGATIVE_REGULATION_OF_FATTY_ACID_METABOLIC_PROCESS     | 1.01 | 0.31 | 0 | 0 | 0 | not significant |
| 11054 | WANG_RESPONSE_TO_PACITAXEL_VIA_MAPK8_UP                    | 1.01 | 0.30 | 0 | 0 | 0 | not significant |
| 11055 | GO_GLUCCORTICOID_METABOLIC_PROCESS                         | 1.01 | 0.29 | 0 | 0 | 0 | not significant |
| 11056 | WONG_ADULT_TISSUE_STEM_MODULE                              | 1.02 | 0.41 | 0 | 0 | 0 | not significant |
| 11057 | ESC_V6.5_UP_EARLY.V1_UP                                    | 1.02 | 0.39 | 0 | 0 | 0 | not significant |
| 11058 | GO_CELL_JUNCTION_ASSEMBLY                                  | 1.02 | 0.39 | 0 | 0 | 0 | not significant |
| 11059 | GO_MEIOTIC_CELL_CYCLE                                      | 1.02 | 0.39 | 0 | 0 | 0 | not significant |
| 11060 | GO_PEPTIDE_SECRETION                                       | 1.02 | 0.39 | 0 | 0 | 0 | not significant |
| 11061 | GO_POSITIVE_REGULATION_OF_SECRETION                        | 1.02 | 0.39 | 0 | 0 | 0 | not significant |
| 11062 | GO_T_CELL_PROLIFERATION                                    | 1.02 | 0.39 | 0 | 0 | 0 | not significant |
| 11063 | CAIRO_HEPATOBLASTOMA_CLASSES_DN                            | 1.02 | 0.38 | 0 | 0 | 0 | not significant |
| 11064 | CHYLA_CBFA2T3_TARGETS_DN                                   | 1.02 | 0.38 | 0 | 0 | 0 | not significant |
| 11065 | FOSTER_TOLERANT_MACROPHAGE_DN                              | 1.02 | 0.38 | 0 | 0 | 0 | not significant |
| 11066 | GO_LEUKOCYTE_PROLIFERATION                                 | 1.02 | 0.38 | 0 | 0 | 0 | not significant |
| 11067 | GO_PHOSPHOLIPID_TRANSPORT                                  | 1.02 | 0.38 | 0 | 0 | 0 | not significant |
| 11068 | GO_RESPONSE_TO_INTERLEUKIN_15                              | 1.02 | 0.38 | 0 | 0 | 0 | not significant |
| 11069 | MITSIADES_RESPONSE_TO_APLINDIN_UP                          | 1.02 | 0.38 | 0 | 0 | 0 | not significant |
| 11070 | SMID_BREAST_CANCER_RELAPSE_IN_BONE_UP                      | 1.02 | 0.38 | 0 | 0 | 0 | not significant |
| 11071 | CHIANG_LIVER_CANCER_SUBCLASS_POLYSOMY7_UP                  | 1.02 | 0.37 | 0 | 0 | 0 | not significant |
| 11072 | CHR11Q24                                                   | 1.02 | 0.37 | 0 | 0 | 0 | not significant |
| 11073 | CHRX11                                                     | 1.02 | 0.37 | 0 | 0 | 0 | not significant |
| 11074 | GO_MITOTIC_DNA_INTEGRITY_CHECKPOINT                        | 1.02 | 0.37 | 0 | 0 | 0 | not significant |
| 11075 | GO_MOTOR_NEURON_AXON_GUIDANCE                              | 1.02 | 0.37 | 0 | 0 | 0 | not significant |
| 11076 | GO_ODONTOGENESIS_OF_DENTIN_CONTAINING_TOOTH                | 1.02 | 0.37 | 0 | 0 | 0 | not significant |
| 11077 | GO_POSITIVE_REGULATION_OF_INSULIN_SECRETION                | 1.02 | 0.37 | 0 | 0 | 0 | not significant |
| 11078 | GO_POSITIVE_REGULATION_OF_T_CELL_APOPTOTIC_PROCESS         | 1.02 | 0.37 | 0 | 0 | 0 | not significant |
| 11079 | GO_PRESYNAPTIC_MEMBRANE_ASSEMBLY                           | 1.02 | 0.37 | 0 | 0 | 0 | not significant |
| 11080 | GO_RECEPTOR_TYROSINE_KINASE_BINDING                        | 1.02 | 0.37 | 0 | 0 | 0 | not significant |
| 11081 | GO_REGULATION_OF_IMMUNE_EFFECTOR_PROCESS                   | 1.02 | 0.37 | 0 | 0 | 0 | not significant |
| 11082 | GO_REGULATION_OF_POSTSYNAPTIC_MEMBRANE_NEUROTRANSMITTE     | 1.02 | 0.37 | 0 | 0 | 0 | not significant |
| 11083 | PETROVA_ENDOTHELIUM_LYMPHATIC_VS_BLOOD_DN                  | 1.02 | 0.37 | 0 | 0 | 0 | not significant |
| 11084 | REACTOME_HEPARAN_SULFATE_HEPARIN_HS_GAG_METABOLISM         | 1.02 | 0.37 | 0 | 0 | 0 | not significant |
| 11085 | RODRIGUES_THYROID_CARCINOMA_DN                             | 1.02 | 0.37 | 0 | 0 | 0 | not significant |
| 11086 | BARIS_THYROID_CANCER_DN                                    | 1.02 | 0.36 | 0 | 0 | 0 | not significant |
| 11087 | GAUSSMANN_MLL_AF4_FUSION_TARGETS_B_UP                      | 1.02 | 0.36 | 0 | 0 | 0 | not significant |
| 11088 | GO_BLOOD_VESSEL_ENDOTHELIAL_CELL_MIGRATION                 | 1.02 | 0.36 | 0 | 0 | 0 | not significant |
| 11089 | GO_Glutamate_Receptor_Binding                              | 1.02 | 0.36 | 0 | 0 | 0 | not significant |
| 11090 | GO_NEGATIVE_REGULATION_OF_DOUBLE_STRAND_BREAK_REPAIR_VIA   | 1.02 | 0.36 | 0 | 0 | 0 | not significant |
| 11091 | GO_REGULATION_OF_CHEMOTAXIS                                | 1.02 | 0.36 | 0 | 0 | 0 | not significant |
| 11092 | KEGG_P53_SIGNALING_PATHWAY                                 | 1.02 | 0.36 | 0 | 0 | 0 | not significant |
| 11093 | MARTIN_INTERACT_WITH_HDAC                                  | 1.02 | 0.36 | 0 | 0 | 0 | not significant |
| 11094 | NIKOLSKY_BREAST_CANCER_8Q23_Q24_AMPLICON                   | 1.02 | 0.36 | 0 | 0 | 0 | not significant |
| 11095 | REACTOME_SURFACTANT_METABOLISM                             | 1.02 | 0.36 | 0 | 0 | 0 | not significant |
| 11096 | BIOCARTA_BIOPEPTIDES_PATHWAY                               | 1.02 | 0.35 | 0 | 0 | 0 | not significant |
| 11097 | GO_MIRNA_MEDIATED_INHIBITION_OF_TRANSLATION                | 1.02 | 0.35 | 0 | 0 | 0 | not significant |
| 11098 | GO_NEGATIVE_REGULATION_OF_EPIDERMAL_GROWTH_FACTOR_ACTI     | 1.02 | 0.35 | 0 | 0 | 0 | not significant |
| 11099 | GO_NEUREXIN_FAMILY_PROTEIN_BINDING                         | 1.02 | 0.35 | 0 | 0 | 0 | not significant |
| 11100 | GO_PROTEIN_LOCALIZATION_TO_LYSOSOME                        | 1.02 | 0.35 | 0 | 0 | 0 | not significant |
| 11101 | GO_SET1C_COMPASS_COMPLEX                                   | 1.02 | 0.35 | 0 | 0 | 0 | not significant |
| 11102 | PID_S1P_S1P1_PATHWAY                                       | 1.02 | 0.35 | 0 | 0 | 0 | not significant |
| 11103 | REACTOME_SYNTHESIS_OF_UDP_N_ACETYL_GLUCCOSAMINE            | 1.02 | 0.35 | 0 | 0 | 0 | not significant |
| 11104 | GO_CELLULAR_RESPONSE_TO_OSMOTIC_STRESS                     | 1.02 | 0.34 | 0 | 0 | 0 | not significant |
| 11105 | GO_HISTONE_H3_K9_DEMETHYLATION                             | 1.02 | 0.34 | 0 | 0 | 0 | not significant |
| 11106 | GO_LAMELLAR_BODY                                           | 1.02 | 0.34 | 0 | 0 | 0 | not significant |

|       |                                                            |      |      |   |   |   |                 |
|-------|------------------------------------------------------------|------|------|---|---|---|-----------------|
| 11107 | GO_NATURAL_KILLER_CELL_LECTIN_LIKE_RECEPTOR_BINDING        | 1.02 | 0.34 | 0 | 0 | 0 | not significant |
| 11108 | GO_POSITIVE_REGULATION_OF_ENDOTHELIAL_CELL_DIFFERENTIATION | 1.02 | 0.34 | 0 | 0 | 0 | not significant |
| 11109 | GO_PROTEIN_K11_LINKED_DEUBIQUITINATION                     | 1.02 | 0.34 | 0 | 0 | 0 | not significant |
| 11110 | NAKAMURA_ADIPOGENESIS_EARLY_DN                             | 1.02 | 0.34 | 0 | 0 | 0 | not significant |
| 11111 | PETRETTO_BLOOD_PRESSURE_DN                                 | 1.02 | 0.34 | 0 | 0 | 0 | not significant |
| 11112 | REACTOME_TERMINATION_OF_O_GLYCAN_BIOSYNTHESIS              | 1.02 | 0.34 | 0 | 0 | 0 | not significant |
| 11113 | GO_DNA_LIGATION_INVOLVED_IN_DNA_REPAIR                     | 1.02 | 0.33 | 0 | 0 | 0 | not significant |
| 11114 | GO_G_QUADRUPLIX_RNA_BINDING                                | 1.02 | 0.33 | 0 | 0 | 0 | not significant |
| 11115 | GO_INTERLEUKIN_12_SECRETION                                | 1.02 | 0.33 | 0 | 0 | 0 | not significant |
| 11116 | GO_OLIGOSACCHARIDE_BINDING                                 | 1.02 | 0.33 | 0 | 0 | 0 | not significant |
| 11117 | GO_REGULATION_OF_METALLOENDOPEPTIDASE_ACTIVITY             | 1.02 | 0.33 | 0 | 0 | 0 | not significant |
| 11118 | GO_RESPONSE_TO_MUSCLE_ACTIVITY                             | 1.02 | 0.33 | 0 | 0 | 0 | not significant |
| 11119 | PID_P38_ALPHA_BETA_PATHWAY                                 | 1.02 | 0.33 | 0 | 0 | 0 | not significant |
| 11120 | GO_CD4_POSITIVE_ALPHA_BETA_T_CELL_CYTOKINE_PRODUCTION      | 1.02 | 0.32 | 0 | 0 | 0 | not significant |
| 11121 | GO_NEGATIVE_REGULATION_OF_ARP2_3_COMPLEX_MEDIATED_ACTIN    | 1.02 | 0.32 | 0 | 0 | 0 | not significant |
| 11122 | GO_REGULATION_OF_SMALL_GTPASE_MEDIATED_SIGNAL_TRANSDUCT    | 1.03 | 0.43 | 0 | 0 | 0 | not significant |
| 11123 | GOZGIT_ESR1_TARGETS_DN                                     | 1.03 | 0.43 | 0 | 0 | 0 | not significant |
| 11124 | GO_LIPID_BINDING                                           | 1.03 | 0.42 | 0 | 0 | 0 | not significant |
| 11125 | BERENJENO_TRANSFORMED_BY_RHOA_DN                           | 1.03 | 0.41 | 0 | 0 | 0 | not significant |
| 11126 | CHR4P16                                                    | 1.03 | 0.41 | 0 | 0 | 0 | not significant |
| 11127 | GO_ANATOMICAL_STRUCTURE_FORMATION_INVOLVED_IN_MORPHOGEN    | 1.03 | 0.41 | 0 | 0 | 0 | not significant |
| 11128 | GO_CELLULAR_CARBOHYDRATE_METABOLIC_PROCESS                 | 1.03 | 0.41 | 0 | 0 | 0 | not significant |
| 11129 | GO_I_KAPPAB_KINASE_NF_KAPPAB_SIGNALING                     | 1.03 | 0.41 | 0 | 0 | 0 | not significant |
| 11130 | GO_MAINTENANCE_OF_LOCATION_IN_CELL                         | 1.03 | 0.41 | 0 | 0 | 0 | not significant |
| 11131 | GO_NEGATIVE_REGULATION_OF_DNA_REPAIR                       | 1.03 | 0.41 | 0 | 0 | 0 | not significant |
| 11132 | GO_NEGATIVE_REGULATION_OF_LYMPHOCYTE_ACTIVATION            | 1.03 | 0.41 | 0 | 0 | 0 | not significant |
| 11133 | KEGG_AMYOTROPHIC_LATERAL_SCLEROSIS_ALS                     | 1.03 | 0.41 | 0 | 0 | 0 | not significant |
| 11134 | AKT_UP_MTOR_DN.V1_DN                                       | 1.03 | 0.40 | 0 | 0 | 0 | not significant |
| 11135 | BIOCARTA_PPARA_PATHWAY                                     | 1.03 | 0.40 | 0 | 0 | 0 | not significant |
| 11136 | GO_NEGATIVE_REGULATION_OF_LEUKOCYTE_DIFFERENTIATION        | 1.03 | 0.40 | 0 | 0 | 0 | not significant |
| 11137 | GO_NEGATIVE_REGULATION_OF_TRANSCRIPTION_BY_RNA_POLYMERAS   | 1.03 | 0.40 | 0 | 0 | 0 | not significant |
| 11138 | GO_REGULATION_OF_RESPONSE_TO_BIOTIC_STIMULUS               | 1.03 | 0.40 | 0 | 0 | 0 | not significant |
| 11139 | GO_RHO_GUANYL_NUCLEOTIDE_EXCHANGE_FACTOR_ACTIVITY          | 1.03 | 0.40 | 0 | 0 | 0 | not significant |
| 11140 | GO_RNA_POLYMERASE_II_REPRESSING_TRANSCRIPTION_FACTOR_BIND  | 1.03 | 0.40 | 0 | 0 | 0 | not significant |
| 11141 | MULLIGHAN_MLL_SIGNATURE_1_DN                               | 1.03 | 0.40 | 0 | 0 | 0 | not significant |
| 11142 | PHONG_TNF_RESPONSE_VIA_P38_PARTIAL                         | 1.03 | 0.40 | 0 | 0 | 0 | not significant |
| 11143 | PID_WNT_NONCANONICAL_PATHWAY                               | 1.03 | 0.40 | 0 | 0 | 0 | not significant |
| 11144 | SANA_RESPONSE_TO_IFNG_UP                                   | 1.03 | 0.40 | 0 | 0 | 0 | not significant |
| 11145 | SHARMA_PILOCYTIC_ASTROCYTOMA_LOCATION_UP                   | 1.03 | 0.40 | 0 | 0 | 0 | not significant |
| 11146 | VANTVEER_BREAST_CANCER_METASTASIS_UP                       | 1.03 | 0.40 | 0 | 0 | 0 | not significant |
| 11147 | CHIARADONNA_NEOPLASTIC_TRANSFORMATION_CDC25_UP             | 1.03 | 0.39 | 0 | 0 | 0 | not significant |
| 11148 | CHR6Q15                                                    | 1.03 | 0.39 | 0 | 0 | 0 | not significant |
| 11149 | CHR7Q22                                                    | 1.03 | 0.39 | 0 | 0 | 0 | not significant |
| 11150 | GO_POSITIVE_REGULATION_OF_B_CELL_ACTIVATION                | 1.03 | 0.39 | 0 | 0 | 0 | not significant |
| 11151 | GO_POSITIVE_REGULATION_OF_MYELOID_CELL_DIFFERENTIATION     | 1.03 | 0.39 | 0 | 0 | 0 | not significant |
| 11152 | GO_PROTEIN_POLYMERIZATION                                  | 1.03 | 0.39 | 0 | 0 | 0 | not significant |
| 11153 | GO_PROTON_TRANSPORTING_V_TYPE_ATPASE_COMPLEX               | 1.03 | 0.39 | 0 | 0 | 0 | not significant |
| 11154 | GO_REGULATION_OF_RESPONSE_TO_CYTOKINE_STIMULUS             | 1.03 | 0.39 | 0 | 0 | 0 | not significant |
| 11155 | GO_SYNAPTIC_SIGNALING                                      | 1.03 | 0.39 | 0 | 0 | 0 | not significant |
| 11156 | REACTOME_DISASSEMBLY_OF_THE_DESTRUCTION_COMPLEX_AND_REC    | 1.03 | 0.39 | 0 | 0 | 0 | not significant |
| 11157 | GO_HIPPO_SIGNALING                                         | 1.03 | 0.38 | 0 | 0 | 0 | not significant |
| 11158 | GO_NUCLEOTIDE_BINDING_DOMAIN_LEUCINE_RICH_REPEAT_CONTAININ | 1.03 | 0.38 | 0 | 0 | 0 | not significant |
| 11159 | GO_REGULATION_OF_MITOPHAGY                                 | 1.03 | 0.38 | 0 | 0 | 0 | not significant |
| 11160 | REACTOME_CELL_JUNCTION_ORGANIZATION                        | 1.03 | 0.38 | 0 | 0 | 0 | not significant |
| 11161 | CHR14Q11                                                   | 1.03 | 0.37 | 0 | 0 | 0 | not significant |
| 11162 | CYCLIN_D1_UP.V1_DN                                         | 1.03 | 0.37 | 0 | 0 | 0 | not significant |
| 11163 | GO_EUKARYOTIC_TRANSLATION_INITIATION_FACTOR_3_COMPLEX      | 1.03 | 0.37 | 0 | 0 | 0 | not significant |
| 11164 | GO_KERATAN_SULFATE_CATABOLIC_PROCESS                       | 1.03 | 0.37 | 0 | 0 | 0 | not significant |
| 11165 | GO_PEPTIDYL_GLUTAMIC_ACID_MODIFICATION                     | 1.03 | 0.37 | 0 | 0 | 0 | not significant |
| 11166 | GO_RESPONSE_TO_SALT_STRESS                                 | 1.03 | 0.37 | 0 | 0 | 0 | not significant |
| 11167 | GO_SOMITE_DEVELOPMENT                                      | 1.03 | 0.37 | 0 | 0 | 0 | not significant |
| 11168 | GO_UDP_GLYCOSYLTRANSFERASE_ACTIVITY                        | 1.03 | 0.37 | 0 | 0 | 0 | not significant |
| 11169 | REACTOME_ASSEMBLY_OF_THE_HIV_VIRION                        | 1.03 | 0.37 | 0 | 0 | 0 | not significant |
| 11170 | REACTOME_ASSEMBLY_OF_THE_ORC_COMPLEX_AT_THE_ORIGIN_OF_I    | 1.03 | 0.37 | 0 | 0 | 0 | not significant |
| 11171 | REACTOME_TRANSCRIPTIONAL_ACTIVITY_OF_SMAD2_SMAD3_SMAD4_HI  | 1.03 | 0.37 | 0 | 0 | 0 | not significant |
| 11172 | WNT_UP.V1_DN                                               | 1.03 | 0.37 | 0 | 0 | 0 | not significant |
| 11173 | GO_BASIC_AMINO_ACID_TRANSMEMBRANE_TRANSPORTER_ACTIVITY     | 1.03 | 0.36 | 0 | 0 | 0 | not significant |
| 11174 | GO_NEGATIVE_REGULATION_OF_CARDIAC_MUSCLE_TISSUE_DEVELOPM   | 1.03 | 0.36 | 0 | 0 | 0 | not significant |
| 11175 | GO_NEGATIVE_REGULATION_OF_GLYCOLYTIC_PROCESS               | 1.03 | 0.36 | 0 | 0 | 0 | not significant |
| 11176 | GO_OLIGOSACCHARIDE_METABOLIC_PROCESS                       | 1.03 | 0.36 | 0 | 0 | 0 | not significant |
| 11177 | GO_PYRIDINE_CONTAINING_COMPOUND_SALVAGE                    | 1.03 | 0.36 | 0 | 0 | 0 | not significant |
| 11178 | GOERING_BLOOD_HDL_CHOLESTEROL_QTL_TRANS                    | 1.03 | 0.36 | 0 | 0 | 0 | not significant |
| 11179 | LANDEMAINE_LUNG_METASTASIS                                 | 1.03 | 0.36 | 0 | 0 | 0 | not significant |
| 11180 | NOJIMA_SFRP2_TARGETS_UP                                    | 1.03 | 0.36 | 0 | 0 | 0 | not significant |
| 11181 | REACTOME_CASPASE_MEDIATED_CLEAVAGE_OF_CYTOSKELETAL_PRC     | 1.03 | 0.36 | 0 | 0 | 0 | not significant |
| 11182 | ABE_VEGFA_TARGETS                                          | 1.03 | 0.35 | 0 | 0 | 0 | not significant |
| 11183 | GO_POSITIVE_REGULATION_OF_DOUBLE_STRAND_BREAK_REPAIR_VIA   | 1.03 | 0.35 | 0 | 0 | 0 | not significant |
| 11184 | GO_RESPONSE_TO_STEROL_DEPLETION                            | 1.03 | 0.35 | 0 | 0 | 0 | not significant |
| 11185 | IZUKA_LIVER_CANCER_PROGRESSION_L0_L1_UP                    | 1.03 | 0.35 | 0 | 0 | 0 | not significant |
| 11186 | GO_CERAMIDE_1_PHOSPHATE_TRANSPORT                          | 1.03 | 0.34 | 0 | 0 | 0 | not significant |
| 11187 | GO_CHEMOREPELLENT_ACTIVITY                                 | 1.03 | 0.34 | 0 | 0 | 0 | not significant |
| 11188 | GO_REGULATION_OF_ACYL_COA_BIOSYNTHETIC_PROCESS             | 1.03 | 0.34 | 0 | 0 | 0 | not significant |
| 11189 | GO_SULFATION                                               | 1.03 | 0.34 | 0 | 0 | 0 | not significant |
| 11190 | GO_UBIQUITIN_DEPENDENT_ENDOCYTOSIS                         | 1.03 | 0.34 | 0 | 0 | 0 | not significant |
| 11191 | MIANTOVANI_NFKB_TARGETS_DN                                 | 1.03 | 0.34 | 0 | 0 | 0 | not significant |
| 11192 | BIOCARTA_INFLAM_PATHWAY                                    | 1.03 | 0.33 | 0 | 0 | 0 | not significant |
| 11193 | GO_CONVERGENT_EXTENSION_INVOLVED_IN_GASTRULATION           | 1.03 | 0.33 | 0 | 0 | 0 | not significant |
| 11194 | REACTOME_IONOTROPIC_ACTIVITY_OF_KAINATE_RECEPTORS          | 1.03 | 0.32 | 0 | 0 | 0 | not significant |
| 11195 | GO_MULTICELLULAR_ORGANISM_REPRODUCTION                     | 1.04 | 0.48 | 0 | 0 | 0 | not significant |
| 11196 | GO_DIVALENT_INORGANIC_CATION_HOMEOSTASIS                   | 1.04 | 0.44 | 0 | 0 | 0 | not significant |
| 11197 | GO_POSITIVE_REGULATION_OF_INTRACELLULAR_SIGNAL_TRANSDUCTK  | 1.04 | 0.44 | 0 | 0 | 0 | not significant |
| 11198 | GO_REGULATION_OF_CARBOHYDRATE_METABOLIC_PROCESS            | 1.04 | 0.44 | 0 | 0 | 0 | not significant |
| 11199 | GO_SITE_OF_POLARIZED_GROWTH                                | 1.04 | 0.44 | 0 | 0 | 0 | not significant |
| 11200 | HALLMARK_COMPLEMENT                                        | 1.04 | 0.44 | 0 | 0 | 0 | not significant |
| 11201 | CHR12P13                                                   | 1.04 | 0.42 | 0 | 0 | 0 | not significant |
| 11202 | CHR17Q25                                                   | 1.04 | 0.42 | 0 | 0 | 0 | not significant |
| 11203 | FIGUEROA_AML_METHYLATION_CLUSTER_6_UP                      | 1.04 | 0.42 | 0 | 0 | 0 | not significant |
| 11204 | GHANDHI_DIRECT_IRRADIATION_UP                              | 1.04 | 0.42 | 0 | 0 | 0 | not significant |
| 11205 | GO_POSITIVE_REGULATION_OF_INTRACELLULAR_PROTEIN_TRANSPOR   | 1.04 | 0.42 | 0 | 0 | 0 | not significant |
| 11206 | GO_REGULATION_OF_DEFENSE_RESPONSE_TO_VIRUS                 | 1.04 | 0.42 | 0 | 0 | 0 | not significant |
| 11207 | MIKKELSEN_MEF_HCP_WITH_H3K27ME3                            | 1.04 | 0.42 | 0 | 0 | 0 | not significant |
| 11208 | RIGGL_EWING_SARCOMA_PROGENITOR_DN                          | 1.04 | 0.42 | 0 | 0 | 0 | not significant |
| 11209 | BIDUS_METASTASIS_DN                                        | 1.04 | 0.41 | 0 | 0 | 0 | not significant |
| 11210 | CSR_LATE_UP.V1_DN                                          | 1.04 | 0.41 | 0 | 0 | 0 | not significant |
| 11211 | GO_POSITIVE_REGULATION_OF_SIGNALING_RECEPTOR_ACTIVITY      | 1.04 | 0.41 | 0 | 0 | 0 | not significant |
| 11212 | GO_PROTEIN_K63_LINKED_DEUBIQUITINATION                     | 1.04 | 0.41 | 0 | 0 | 0 | not significant |
| 11213 | GO_REGULATION_OF_CYCLIN_DEPENDENT_PROTEIN_KINASE_ACTIVITY  | 1.04 | 0.41 | 0 | 0 | 0 | not significant |
| 11214 | GO_SENSORY_PERCEPTION_OF_PAIN                              | 1.04 | 0.41 | 0 | 0 | 0 | not significant |
| 11215 | MAGRANGEAS_MULTIPLE_MYELOMA_IGLL_VS_IGLK_UP                | 1.04 | 0.41 | 0 | 0 | 0 | not significant |



|       |                                                          |      |      |   |   |   |                 |
|-------|----------------------------------------------------------|------|------|---|---|---|-----------------|
| 11216 | RASHI_RESPONSE_TO_IONIZING_RADIATION_2                   | 1.04 | 0.41 | 0 | 0 | 0 | not significant |
| 11217 | REACTOME_ASSEMBLY_OF_COLLAGEN_FIBRILS_AND_OTHER_MULTIME  | 1.04 | 0.41 | 0 | 0 | 0 | not significant |
| 11218 | REACTOME_INSULIN_RECEPTOR_RECYCLING                      | 1.04 | 0.41 | 0 | 0 | 0 | not significant |
| 11219 | REACTOME_SIGNALING_BY_ERBB4                              | 1.04 | 0.41 | 0 | 0 | 0 | not significant |
| 11220 | FERRANDO_LYL1_NEIGHBORS                                  | 1.04 | 0.40 | 0 | 0 | 0 | not significant |
| 11221 | IKEDA_MIR30_TARGETS_DN                                   | 1.04 | 0.40 | 0 | 0 | 0 | not significant |
| 11222 | KRAS_PROSTATE_UP_V1_UP                                   | 1.04 | 0.40 | 0 | 0 | 0 | not significant |
| 11223 | MYC_UP_V1_DN                                             | 1.04 | 0.40 | 0 | 0 | 0 | not significant |
| 11224 | PID_E2F_PATHWAY                                          | 1.04 | 0.40 | 0 | 0 | 0 | not significant |
| 11225 | PID_KIT_PATHWAY                                          | 1.04 | 0.40 | 0 | 0 | 0 | not significant |
| 11226 | REACTOME_NUCLEOBASE_BIOSYNTHESIS                         | 1.04 | 0.40 | 0 | 0 | 0 | not significant |
| 11227 | YOKOE_CANCER_TESTIS_ANTIGENS                             | 1.04 | 0.40 | 0 | 0 | 0 | not significant |
| 11228 | BIOCARTA_IL2_PATHWAY                                     | 1.04 | 0.39 | 0 | 0 | 0 | not significant |
| 11229 | GO_CELLULAR_CARBOHYDRATE_BIOSYNTHETIC_PROCESS            | 1.04 | 0.39 | 0 | 0 | 0 | not significant |
| 11230 | GO_NEGATIVE_REGULATION_OF_REACTIVE_OXYGEN_SPECIES_BIOSYN | 1.04 | 0.39 | 0 | 0 | 0 | not significant |
| 11231 | GO_STEROL_TRANSPORTER_ACTIVITY                           | 1.04 | 0.39 | 0 | 0 | 0 | not significant |
| 11232 | OUELLET_CULTURED_OVARIAN_CANCER_INVASIVE_VS_LMP_DN       | 1.04 | 0.39 | 0 | 0 | 0 | not significant |
| 11233 | REACTOME_COLLAGEN_FORMATION                              | 1.04 | 0.39 | 0 | 0 | 0 | not significant |
| 11234 | VERRECCHIA_EARLY_RESPONSE_TO_TGFB1                       | 1.04 | 0.39 | 0 | 0 | 0 | not significant |
| 11235 | CHR15Q23                                                 | 1.04 | 0.38 | 0 | 0 | 0 | not significant |
| 11236 | GO_NEGATIVE_REGULATION_OF_PROTEIN_EXIT_FROM_ENDOPLASMIC  | 1.04 | 0.38 | 0 | 0 | 0 | not significant |
| 11237 | GO_POSITIVE_REGULATION_OF_ACUTE_INFLAMMATORY_RESPONSE    | 1.04 | 0.38 | 0 | 0 | 0 | not significant |
| 11238 | GO_REGULATION_OF_LONG_TERM_SYNAPTIC_POTENTIATION         | 1.04 | 0.38 | 0 | 0 | 0 | not significant |
| 11239 | GO_REGULATION_OF_PROTEIN_OLIGOMERIZATION                 | 1.04 | 0.38 | 0 | 0 | 0 | not significant |
| 11240 | HALLMARK_ANGIOGENESIS                                    | 1.04 | 0.38 | 0 | 0 | 0 | not significant |
| 11241 | PID_PTP1B_PATHWAY                                        | 1.04 | 0.38 | 0 | 0 | 0 | not significant |
| 11242 | REACTOME_PI_3K_CASCADE_FGFR3                             | 1.04 | 0.38 | 0 | 0 | 0 | not significant |
| 11243 | GO_BLEB_ASSEMBLY                                         | 1.04 | 0.37 | 0 | 0 | 0 | not significant |
| 11244 | GO_CALCIIUM_ION_TRANSMEMBRANE_TRANSPORT_VIA_HIGH_VOLTAGE | 1.04 | 0.37 | 0 | 0 | 0 | not significant |
| 11245 | GO_CYCLIC_NUCLEOTIDE_CATABOLIC_PROCESS                   | 1.04 | 0.37 | 0 | 0 | 0 | not significant |
| 11246 | GO_HISTONE_DEMETHYLASE_ACTIVITY_H3_K36_SPECIFIC_         | 1.04 | 0.37 | 0 | 0 | 0 | not significant |
| 11247 | GO_PHOSPHATIDYLETHANOLAMINE_BINDING                      | 1.04 | 0.37 | 0 | 0 | 0 | not significant |
| 11248 | GO_POSITIVE_REGULATION_OF_TISSUE_REMODELING              | 1.04 | 0.37 | 0 | 0 | 0 | not significant |
| 11249 | GO_POSTSYNAPSE_ASSEMBLY                                  | 1.04 | 0.37 | 0 | 0 | 0 | not significant |
| 11250 | GO_POSTSYNAPTIC_DENSITY_ASSEMBLY                         | 1.04 | 0.37 | 0 | 0 | 0 | not significant |
| 11251 | GO_SERINE_PHOSPHORYLATION_OF_STAT_PROTEIN                | 1.04 | 0.37 | 0 | 0 | 0 | not significant |
| 11252 | GO_SPECTRIN                                              | 1.04 | 0.37 | 0 | 0 | 0 | not significant |
| 11253 | BIOCARTA_CTLA4_PATHWAY                                   | 1.04 | 0.36 | 0 | 0 | 0 | not significant |
| 11254 | GO_G_PROTEIN_COUPLED_Glutamate_Receptor_Binding          | 1.04 | 0.36 | 0 | 0 | 0 | not significant |
| 11255 | GO_RESPONSE_TO_PROTOZOAN                                 | 1.04 | 0.36 | 0 | 0 | 0 | not significant |
| 11256 | GO_VCP_NPL4_UFD1_AAA_ATPASE_COMPLEX                      | 1.04 | 0.36 | 0 | 0 | 0 | not significant |
| 11257 | GO_VENOUS_BLOOD_VESSEL_DEVELOPMENT                       | 1.04 | 0.36 | 0 | 0 | 0 | not significant |
| 11258 | GO_CYCLASE_ACTIVITY                                      | 1.04 | 0.35 | 0 | 0 | 0 | not significant |
| 11259 | GO_HISTONE_H3_K4_DEMETHYLATION                           | 1.04 | 0.35 | 0 | 0 | 0 | not significant |
| 11260 | GO_NUCLEOTIDASE_ACTIVITY                                 | 1.04 | 0.35 | 0 | 0 | 0 | not significant |
| 11261 | MARSON_FOXP3_TARGETS_STIMULATED_DN                       | 1.04 | 0.35 | 0 | 0 | 0 | not significant |
| 11262 | REACTOME_KERATAN_SULFATE_DEGRADATION                     | 1.04 | 0.35 | 0 | 0 | 0 | not significant |
| 11263 | REACTOME_SERINE_BIOSYNTHESIS                             | 1.04 | 0.35 | 0 | 0 | 0 | not significant |
| 11264 | REACTOME_SIGNALING_BY_BMP                                | 1.04 | 0.35 | 0 | 0 | 0 | not significant |
| 11265 | GO_LIPID_KINASE_ACTIVITY                                 | 1.04 | 0.34 | 0 | 0 | 0 | not significant |
| 11266 | GO_NLRP3_INFLAMMASOME_COMPLEX                            | 1.04 | 0.34 | 0 | 0 | 0 | not significant |
| 11267 | GO_REGULATION_OF_POSTSYNAPTIC_SPECIALIZATION_ASSEMBLY    | 1.04 | 0.34 | 0 | 0 | 0 | not significant |
| 11268 | MARTENS_TRETINOIN_RESPONSE_DN                            | 1.05 | 0.53 | 0 | 0 | 0 | not significant |
| 11269 | GO_NEGATIVE_REGULATION_OF_MULTICELLULAR_ORGANISMAL_PROCI | 1.05 | 0.50 | 0 | 0 | 0 | not significant |
| 11270 | GO_TRANSCRIPTION_COREPRESSOR_ACTIVITY                    | 1.05 | 0.49 | 0 | 0 | 0 | not significant |
| 11271 | STK33_NOMO_DN                                            | 1.05 | 0.49 | 0 | 0 | 0 | not significant |
| 11272 | ZWANG_CLASS_3_TRANSIENTLY_INDUCED_BY_EGF                 | 1.05 | 0.49 | 0 | 0 | 0 | not significant |
| 11273 | TIEN_INTESTINE_PROBIOTICS_24HR_DN                        | 1.05 | 0.48 | 0 | 0 | 0 | not significant |
| 11274 | GO_NEGATIVE_REGULATION_OF_PEPTIDASE_ACTIVITY             | 1.05 | 0.47 | 0 | 0 | 0 | not significant |
| 11275 | GO_PLASMA_MEMBRANE_PROTEIN_COMPLEX                       | 1.05 | 0.47 | 0 | 0 | 0 | not significant |
| 11276 | GO_REGULATION_OF_LYMPHOCYTE_ACTIVATION                   | 1.05 | 0.46 | 0 | 0 | 0 | not significant |
| 11277 | GO_RIBOSOMAL_SUBUNIT                                     | 1.05 | 0.46 | 0 | 0 | 0 | not significant |
| 11278 | ASTON_MAJOR_DEPRESSIVE_DISORDER_DN                       | 1.05 | 0.45 | 0 | 0 | 0 | not significant |
| 11279 | GO_EPITHELIAL_CELL_PROLIFERATION                         | 1.05 | 0.45 | 0 | 0 | 0 | not significant |
| 11280 | GO_LOCOMOTORY_BEHAVIOR                                   | 1.05 | 0.45 | 0 | 0 | 0 | not significant |
| 11281 | BENPORATH_NOS_TARGETS                                    | 1.05 | 0.44 | 0 | 0 | 0 | not significant |
| 11282 | GO_REGULATION_OF_ALPHA_BETA_T_CELL_ACTIVATION            | 1.05 | 0.44 | 0 | 0 | 0 | not significant |
| 11283 | LI_WILMS_TUMOR_VS_FETAL_KIDNEY_2_UP                      | 1.05 | 0.44 | 0 | 0 | 0 | not significant |
| 11284 | TAKEDA_TARGETS_OF_NUP98_HOX9A_FUSION_8D_UP               | 1.05 | 0.44 | 0 | 0 | 0 | not significant |
| 11285 | GO_CYTOPLASMIC_TRANSLATION                               | 1.05 | 0.43 | 0 | 0 | 0 | not significant |
| 11286 | GO_EXTRINSIC_COMPONENT_OF_PLASMA_MEMBRANE                | 1.05 | 0.43 | 0 | 0 | 0 | not significant |
| 11287 | YAGI_AML_SURVIVAL                                        | 1.05 | 0.43 | 0 | 0 | 0 | not significant |
| 11288 | CHR3Q21                                                  | 1.05 | 0.42 | 0 | 0 | 0 | not significant |
| 11289 | GARGALOVIC_RESPONSE_TO_OXIDIZED_PHOSPHOLIPIDS_CYAN_UP    | 1.05 | 0.42 | 0 | 0 | 0 | not significant |
| 11290 | GO_AMMONIUM_ION_METABOLIC_PROCESS                        | 1.05 | 0.42 | 0 | 0 | 0 | not significant |
| 11291 | GO_POSITIVE_REGULATION_OF_PEPTIDE_HORMONE_SECRETION      | 1.05 | 0.42 | 0 | 0 | 0 | not significant |
| 11292 | GO_REGULATION_OF_MACROPHAGE_MIGRATION                    | 1.05 | 0.42 | 0 | 0 | 0 | not significant |
| 11293 | SHIN_B_CELL_LYMPHOMA_CLUSTER_2                           | 1.05 | 0.42 | 0 | 0 | 0 | not significant |
| 11294 | STEIN_ESRRA_TARGETS_DN                                   | 1.05 | 0.42 | 0 | 0 | 0 | not significant |
| 11295 | BIOCARTA_HER2_PATHWAY                                    | 1.05 | 0.41 | 0 | 0 | 0 | not significant |
| 11296 | GO_INTERLEUKIN_6_PRODUCTION                              | 1.05 | 0.41 | 0 | 0 | 0 | not significant |
| 11297 | GO_NEGATIVE_REGULATION_OF_ERYTHROCYTE_DIFFERENTIATION    | 1.05 | 0.41 | 0 | 0 | 0 | not significant |
| 11298 | GO_POSITIVE_REGULATION_OF_CENTROSOME_DUPLICATION         | 1.05 | 0.41 | 0 | 0 | 0 | not significant |
| 11299 | GO_POSITIVE_REGULATION_OF_HORMONE_SECRETION              | 1.05 | 0.41 | 0 | 0 | 0 | not significant |
| 11300 | GO_POSITIVE_REGULATION_OF_LYMPHOCYTE_MEDIATED_IMMUNITY   | 1.05 | 0.41 | 0 | 0 | 0 | not significant |
| 11301 | GO_REGULATION_OF_B_CELL_APOPTOTIC_PROCESS                | 1.05 | 0.41 | 0 | 0 | 0 | not significant |
| 11302 | REACTOME_G_ALPHA_S_SIGNALING_EVENTS                      | 1.05 | 0.41 | 0 | 0 | 0 | not significant |
| 11303 | URS_ADIPOCYTE_DIFFERENTIATION_UP                         | 1.05 | 0.41 | 0 | 0 | 0 | not significant |
| 11304 | BCAT_GDS748_DN                                           | 1.05 | 0.40 | 0 | 0 | 0 | not significant |
| 11305 | BIOCARTA_TFF_PATHWAY                                     | 1.05 | 0.40 | 0 | 0 | 0 | not significant |
| 11306 | GO_BRUSH_BORDER_MEMBRANE                                 | 1.05 | 0.40 | 0 | 0 | 0 | not significant |
| 11307 | GO_NEGATIVE_REGULATION_OF_ACTIN_FILAMENT_POLYMERIZATION  | 1.05 | 0.40 | 0 | 0 | 0 | not significant |
| 11308 | GO_PANCREAS_DEVELOPMENT                                  | 1.05 | 0.40 | 0 | 0 | 0 | not significant |
| 11309 | GO_REGULATION_OF_GENE_EXPRESSION_BY_GENETIC_IMPRINTING   | 1.05 | 0.40 | 0 | 0 | 0 | not significant |
| 11310 | GO_TRANSLATION_ELONGATION_FACTOR_ACTIVITY                | 1.05 | 0.40 | 0 | 0 | 0 | not significant |
| 11311 | LOPEZ_MESOTHELIOMA_SURVIVAL_UP                           | 1.05 | 0.40 | 0 | 0 | 0 | not significant |
| 11312 | SWEET_KRAS_ONCOGENIC_SIGNATURE                           | 1.05 | 0.40 | 0 | 0 | 0 | not significant |
| 11313 | WINZEN_DEGRADED_VIA_KHSRP                                | 1.05 | 0.40 | 0 | 0 | 0 | not significant |
| 11314 | CHIARETTI_ACUTE_LYMPHOBLASTIC_LEUKEMIA_ZAP70             | 1.05 | 0.39 | 0 | 0 | 0 | not significant |
| 11315 | GO_CERAMIDE_TRANSPORT                                    | 1.05 | 0.39 | 0 | 0 | 0 | not significant |
| 11316 | GO_MITOTIC_DNA_REPLICATION_CHECKPOINT                    | 1.05 | 0.39 | 0 | 0 | 0 | not significant |
| 11317 | GO_NADPLUS_KINASE_ACTIVITY                               | 1.05 | 0.39 | 0 | 0 | 0 | not significant |
| 11318 | GO_NEUTRAL_LIPID_CATABOLIC_PROCESS                       | 1.05 | 0.39 | 0 | 0 | 0 | not significant |
| 11319 | GO_POSITIVE_REGULATION_OF_PROTEIN_GLYCOSYLATION          | 1.05 | 0.39 | 0 | 0 | 0 | not significant |
| 11320 | GO_POST_EMBRYONIC_ANIMAL_ORGAN_MORPHOGENESIS             | 1.05 | 0.39 | 0 | 0 | 0 | not significant |
| 11321 | GO_REGULATION_OF_CARDIAC_MUSCLE_CELL_ACTION_POTENTIAL    | 1.05 | 0.39 | 0 | 0 | 0 | not significant |
| 11322 | MARIADASON_RESPONSE_TO_BUTYRATE_CURCUMIN_SULINDAC_TSA_8  | 1.05 | 0.39 | 0 | 0 | 0 | not significant |
| 11323 | MEISSNER_BRAIN_HCP_WITH_H3K4ME2                          | 1.05 | 0.39 | 0 | 0 | 0 | not significant |
| 11324 | REACTOME_INTEGRIN_CELL_SURFACE_INTERACTIONS              | 1.05 | 0.39 | 0 | 0 | 0 | not significant |

|       |                                                            |      |      |   |   |   |                 |
|-------|------------------------------------------------------------|------|------|---|---|---|-----------------|
| 11325 | REACTOME_RESOLUTION_OF_D_LOOP_STRUCTURES                   | 1.05 | 0.39 | 0 | 0 | 0 | not significant |
| 11326 | SA_MMP_CYTOKINE_CONNECTION                                 | 1.05 | 0.39 | 0 | 0 | 0 | not significant |
| 11327 | CLAUS_PGR_POSITIVE_MENINGIOMA_DN                           | 1.05 | 0.38 | 0 | 0 | 0 | not significant |
| 11328 | GO_CELL_JUNCTION_MAINTENANCE                               | 1.05 | 0.38 | 0 | 0 | 0 | not significant |
| 11329 | GO_CYTOPLASM_ORGANIZATION                                  | 1.05 | 0.38 | 0 | 0 | 0 | not significant |
| 11330 | GO_HISTONE_H3_K36_DEMETHYLATION                            | 1.05 | 0.38 | 0 | 0 | 0 | not significant |
| 11331 | GO_CTF18_RFC_LIKE_COMPLEX                                  | 1.05 | 0.37 | 0 | 0 | 0 | not significant |
| 11332 | GO_MEMBRANE_HYPERPOLARIZATION                              | 1.05 | 0.37 | 0 | 0 | 0 | not significant |
| 11333 | GO_NATURAL_KILLER_CELL_CYTOKINE_PRODUCTION                 | 1.05 | 0.37 | 0 | 0 | 0 | not significant |
| 11334 | HAHTOLA_MYCOSIS_FUNGOIDES_DN                               | 1.05 | 0.37 | 0 | 0 | 0 | not significant |
| 11335 | SCHAEFFER_PROSTATE_DEVELOPMENT_AND_CANCER_BOX5_UP          | 1.05 | 0.37 | 0 | 0 | 0 | not significant |
| 11336 | TERAMOTO_OPN_TARGETS_CLUSTER_5                             | 1.05 | 0.37 | 0 | 0 | 0 | not significant |
| 11337 | YANAGISAWA_LUNG_CANCER_RECURRENCE                          | 1.05 | 0.37 | 0 | 0 | 0 | not significant |
| 11338 | GO_HYPERSENSITIVITY                                        | 1.05 | 0.36 | 0 | 0 | 0 | not significant |
| 11339 | GO_REGULATION_OF_ADENYLATE_CYCLASE_ACTIVATING_G_PROTEIN    | 1.05 | 0.36 | 0 | 0 | 0 | not significant |
| 11340 | GO_AMINO_SUGAR_CATABOLIC_PROCESS                           | 1.05 | 0.35 | 0 | 0 | 0 | not significant |
| 11341 | GRAESSMANN_APOPTOSIS_BY_DOXORUBICIN_UP                     | 1.06 | 0.59 | 0 | 0 | 0 | not significant |
| 11342 | ZHANG_TLX_TARGETS_60HR_UP                                  | 1.06 | 0.51 | 0 | 0 | 0 | not significant |
| 11343 | GO_REGULATION_OF_PEPTIDE_SECRETION                         | 1.06 | 0.50 | 0 | 0 | 0 | not significant |
| 11344 | LIU_PROSTATE_CANCER_DN                                     | 1.06 | 0.50 | 0 | 0 | 0 | not significant |
| 11345 | UDAYAKUMAR_MED1_TARGETS_DN                                 | 1.06 | 0.50 | 0 | 0 | 0 | not significant |
| 11346 | CHR17Q11                                                   | 1.06 | 0.49 | 0 | 0 | 0 | not significant |
| 11347 | YAGI_AML_WITH_T_8_21_TRANSLOCATION                         | 1.06 | 0.49 | 0 | 0 | 0 | not significant |
| 11348 | GO_SKELETAL_SYSTEM_DEVELOPMENT                             | 1.06 | 0.48 | 0 | 0 | 0 | not significant |
| 11349 | PEREZ_TP63_TARGETS                                         | 1.06 | 0.48 | 0 | 0 | 0 | not significant |
| 11350 | WANG_HCP_PROSTATE_CANCER                                   | 1.06 | 0.48 | 0 | 0 | 0 | not significant |
| 11351 | XU_GH1_AUTOOCRINE_TARGETS_DN                               | 1.06 | 0.48 | 0 | 0 | 0 | not significant |
| 11352 | CTIP_DN.V1_DN                                              | 1.06 | 0.46 | 0 | 0 | 0 | not significant |
| 11353 | GO_CATION_CHANNEL_ACTIVITY                                 | 1.06 | 0.46 | 0 | 0 | 0 | not significant |
| 11354 | GO_HYDROLASE_ACTIVITY_ACTING_ON_CARBON_NITROGEN_BUT_NOT    | 1.06 | 0.46 | 0 | 0 | 0 | not significant |
| 11355 | GO_OLIGODENDROCYTE_DIFFERENTIATION                         | 1.06 | 0.46 | 0 | 0 | 0 | not significant |
| 11356 | CHIANG_LIVER_CANCER_SUBCLASS_CTNNB1_UP                     | 1.06 | 0.45 | 0 | 0 | 0 | not significant |
| 11357 | MARTIN_VIRAL_GPCR_SIGNALING_UP                             | 1.06 | 0.45 | 0 | 0 | 0 | not significant |
| 11358 | PGF_UP.V1_DN                                               | 1.06 | 0.45 | 0 | 0 | 0 | not significant |
| 11359 | VERNELL_RETINOBLASTOMA_PATHWAY_UP                          | 1.06 | 0.45 | 0 | 0 | 0 | not significant |
| 11360 | PRC2_SUZ12_UP.V1_UP                                        | 1.06 | 0.44 | 0 | 0 | 0 | not significant |
| 11361 | GO_K63_LINKED_POLYUBIQUITIN_MODIFICATION_DEPENDENT_PROTEIN | 1.06 | 0.43 | 0 | 0 | 0 | not significant |
| 11362 | GO_KIDNEY_MORPHOGENESIS                                    | 1.06 | 0.43 | 0 | 0 | 0 | not significant |
| 11363 | GO_SECONDARY_ALCOHOL_METABOLIC_PROCESS                     | 1.06 | 0.43 | 0 | 0 | 0 | not significant |
| 11364 | GO_SOMATIC_DIVERSIFICATION_OF_IMMUNE_RECEPTORS_VIA_GERMLI  | 1.06 | 0.43 | 0 | 0 | 0 | not significant |
| 11365 | GO_TIGHT_JUNCTION                                          | 1.06 | 0.43 | 0 | 0 | 0 | not significant |
| 11366 | KIM_GERMINAL_CENTER_T_HELPER_DN                            | 1.06 | 0.43 | 0 | 0 | 0 | not significant |
| 11367 | REACTOME_IMMUNOREGULATORY_INTERACTIONS_BETWEEN_A_LYMPH     | 1.06 | 0.43 | 0 | 0 | 0 | not significant |
| 11368 | REACTOME_SIGNALING_BY_FGFR_IN_DISEASE                      | 1.06 | 0.43 | 0 | 0 | 0 | not significant |
| 11369 | CAFFAREL_RESPONSE_TO_THC_UP                                | 1.06 | 0.42 | 0 | 0 | 0 | not significant |
| 11370 | CHARADONNA_NEOPLASTIC_TRANSFORMATION_KRAS_CDC25_DN         | 1.06 | 0.42 | 0 | 0 | 0 | not significant |
| 11371 | CHR15Q14                                                   | 1.06 | 0.42 | 0 | 0 | 0 | not significant |
| 11372 | GO_REGULATION_OF_ESTABLISHMENT_OR_MAINTENANCE_OF_CELL_PC   | 1.06 | 0.42 | 0 | 0 | 0 | not significant |
| 11373 | KANG_CISPLATIN_RESISTANCE_UP                               | 1.06 | 0.42 | 0 | 0 | 0 | not significant |
| 11374 | REACTOME_DOWNSTREAM_SIGNALING_OF_ACTIVATED_FGFR1           | 1.06 | 0.42 | 0 | 0 | 0 | not significant |
| 11375 | CHR15Q13                                                   | 1.06 | 0.41 | 0 | 0 | 0 | not significant |
| 11376 | CHR4Q21                                                    | 1.06 | 0.41 | 0 | 0 | 0 | not significant |
| 11377 | GO_ATRIOVENTRICULAR_VALVE_DEVELOPMENT                      | 1.06 | 0.41 | 0 | 0 | 0 | not significant |
| 11378 | GO_CELL_FATE_COMMITMENT_INVOLVED_IN_FORMATION_OF_PRIMARY   | 1.06 | 0.41 | 0 | 0 | 0 | not significant |
| 11379 | GO_CELL_PROLIFERATION_IN_FOREBRAIN                         | 1.06 | 0.41 | 0 | 0 | 0 | not significant |
| 11380 | GO_CELLULAR_RESPONSE_TO_ETHANOL                            | 1.06 | 0.41 | 0 | 0 | 0 | not significant |
| 11381 | GO_COHESIN_COMPLEX                                         | 1.06 | 0.41 | 0 | 0 | 0 | not significant |
| 11382 | GO_INTERMEDIATE_FILAMENT_BASED_PROCESS                     | 1.06 | 0.41 | 0 | 0 | 0 | not significant |
| 11383 | GO_LYMPH_VESSEL_DEVELOPMENT                                | 1.06 | 0.41 | 0 | 0 | 0 | not significant |
| 11384 | GO_NEGATIVE_REGULATION_OF_DEFENSE_RESPONSE_TO_VIRUS        | 1.06 | 0.41 | 0 | 0 | 0 | not significant |
| 11385 | GO_PROTEIN_DEMANNOSYLATION                                 | 1.06 | 0.41 | 0 | 0 | 0 | not significant |
| 11386 | GO_REGULATION_OF_SMOOTH_MUSCLE_CONTRACTION                 | 1.06 | 0.41 | 0 | 0 | 0 | not significant |
| 11387 | PID_INTEGRIN3_PATHWAY                                      | 1.06 | 0.41 | 0 | 0 | 0 | not significant |
| 11388 | GO_NEGATIVE_REGULATION_OF_OSTEOCLAST_DIFFERENTIATION       | 1.06 | 0.40 | 0 | 0 | 0 | not significant |
| 11389 | GO_SENSORY_PERCEPTION_OF_TASTE                             | 1.06 | 0.40 | 0 | 0 | 0 | not significant |
| 11390 | GO_SPINAL_CORD_MOTOR_NEURON_DIFFERENTIATION                | 1.06 | 0.40 | 0 | 0 | 0 | not significant |
| 11391 | HANSON_HRAS_SIGNALING_VIA_NFKB                             | 1.06 | 0.40 | 0 | 0 | 0 | not significant |
| 11392 | KEGG_GLYCOXILATE_AND_DICARBOXYLATE_METABOLISM              | 1.06 | 0.40 | 0 | 0 | 0 | not significant |
| 11393 | SU_PLACENTA                                                | 1.06 | 0.40 | 0 | 0 | 0 | not significant |
| 11394 | GO_ARYL_HYDROCARBON_RECEPTOR_BINDING                       | 1.06 | 0.39 | 0 | 0 | 0 | not significant |
| 11395 | GO_MEMBRANE_DEPOLARIZATION_DURING_ACTION_POTENTIAL         | 1.06 | 0.39 | 0 | 0 | 0 | not significant |
| 11396 | GO_POSTSYNAPTIC_RECYCLING_ENDOSOME                         | 1.06 | 0.39 | 0 | 0 | 0 | not significant |
| 11397 | GO_RESPONSE_TO_POTASSIUM_ION                               | 1.06 | 0.39 | 0 | 0 | 0 | not significant |
| 11398 | GO_KETONE_CATABOLIC_PROCESS                                | 1.06 | 0.38 | 0 | 0 | 0 | not significant |
| 11399 | GO_MEMBRANE_RAFT_DISTRIBUTION                              | 1.06 | 0.38 | 0 | 0 | 0 | not significant |
| 11400 | HOLLEMAN_PREDNISOLONE_RESISTANCE_B_ALL_DN                  | 1.06 | 0.38 | 0 | 0 | 0 | not significant |
| 11401 | GO_CELL_MIGRATION_INVOLVED_IN_HEART_DEVELOPMENT            | 1.06 | 0.37 | 0 | 0 | 0 | not significant |
| 11402 | GO_FAT_CELL_PROLIFERATION                                  | 1.06 | 0.37 | 0 | 0 | 0 | not significant |
| 11403 | GO_HYALURONIC_ACID_BINDING                                 | 1.06 | 0.37 | 0 | 0 | 0 | not significant |
| 11404 | GO_LOCOMOTION_INVOLVED_IN_LOCOMOTORY_BEHAVIOR              | 1.06 | 0.37 | 0 | 0 | 0 | not significant |
| 11405 | GO_NEGATIVE_REGULATION_OF_B_CELL_PROLIFERATION             | 1.06 | 0.37 | 0 | 0 | 0 | not significant |
| 11406 | GO_NEGATIVE_REGULATION_OF_INTERLEUKIN_1_SECRETION          | 1.06 | 0.37 | 0 | 0 | 0 | not significant |
| 11407 | GO_POSITIVE_REGULATION_OF_CELL_POPULATION_PROLIFERATION    | 1.07 | 0.55 | 0 | 0 | 0 | not significant |
| 11408 | BROWNE_HCMV_INFECTION_48HR_DN                              | 1.07 | 0.54 | 0 | 0 | 0 | not significant |
| 11409 | GO_REGULATION_OF_CELL_ACTIVATION                           | 1.07 | 0.53 | 0 | 0 | 0 | not significant |
| 11410 | TGFB_UP.V1_DN                                              | 1.07 | 0.51 | 0 | 0 | 0 | not significant |
| 11411 | GO_PASSIVE_TRANSMEMBRANE_TRANSPORTER_ACTIVITY              | 1.07 | 0.50 | 0 | 0 | 0 | not significant |
| 11412 | GO_TRANSFERASE_ACTIVITY_TRANSFERRING_HEXOSYL_GROUPS        | 1.07 | 0.50 | 0 | 0 | 0 | not significant |
| 11413 | GO_POSITIVE_REGULATION_OF_LEUKOCYTE_CELL_CELL_ADHESION     | 1.07 | 0.49 | 0 | 0 | 0 | not significant |
| 11414 | GO_REGULATION_OF_OSSIFICATION                              | 1.07 | 0.49 | 0 | 0 | 0 | not significant |
| 11415 | GO_REGULATION_OF_PROTEIN_POLYMERIZATION                    | 1.07 | 0.49 | 0 | 0 | 0 | not significant |
| 11416 | ESC_V6_5_UP_LATE.V1_UP                                     | 1.07 | 0.48 | 0 | 0 | 0 | not significant |
| 11417 | GO_DEACETYLASE_ACTIVITY                                    | 1.07 | 0.47 | 0 | 0 | 0 | not significant |
| 11418 | REACTOME_TRAF6_MEDIATED_INDUCION_OF_TAK1_COMPLEX_WITHIN    | 1.07 | 0.46 | 0 | 0 | 0 | not significant |
| 11419 | GO_HISTONE_H2A_MONOUBIQUITINATION                          | 1.07 | 0.45 | 0 | 0 | 0 | not significant |
| 11420 | GO_INTRINSIC_APOPTOTIC_SIGNALING_PATHWAY_BY_P53_CLASS_MEDI | 1.07 | 0.45 | 0 | 0 | 0 | not significant |
| 11421 | TAYLOR_METHYLATED_IN_ACUTE_LYMPHOBLASTIC_LEUKEMIA          | 1.07 | 0.45 | 0 | 0 | 0 | not significant |
| 11422 | BHAT_ESR1_TARGETS_NOT_VIA_AKT1_DN                          | 1.07 | 0.44 | 0 | 0 | 0 | not significant |
| 11423 | GO_ESTABLISHMENT_OF_PROTEIN_LOCALIZATION_TO_VACUOLE        | 1.07 | 0.44 | 0 | 0 | 0 | not significant |
| 11424 | GO_MAINTENANCE_OF_PROTEIN_LOCALIZATION_IN_ORGANELLE        | 1.07 | 0.44 | 0 | 0 | 0 | not significant |
| 11425 | GO_SEMAPHORIN_RECEPTOR_BINDING                             | 1.07 | 0.44 | 0 | 0 | 0 | not significant |
| 11426 | MIKKELSEN_IPS_HCP_WITH_H3_UNMETHYLATED                     | 1.07 | 0.44 | 0 | 0 | 0 | not significant |
| 11427 | REACTOME_DEGRADATION_OF_THE_EXTRACELLULAR_MATRIX           | 1.07 | 0.44 | 0 | 0 | 0 | not significant |
| 11428 | REACTOME_IRS_MEDIATED_SIGNALLING                           | 1.07 | 0.44 | 0 | 0 | 0 | not significant |
| 11429 | CHR10P12                                                   | 1.07 | 0.43 | 0 | 0 | 0 | not significant |
| 11430 | GO_POSITIVE_REGULATION_OF_CYTOKINE_PRODUCTION_INVOLVED_IN  | 1.07 | 0.43 | 0 | 0 | 0 | not significant |
| 11431 | GO_POSITIVE_REGULATION_OF_PROTEIN_POLYMERIZATION           | 1.07 | 0.43 | 0 | 0 | 0 | not significant |
| 11432 | GO_PROTEIN_TARGETING_TO_VACUOLE                            | 1.07 | 0.43 | 0 | 0 | 0 | not significant |
| 11433 | GO_REGULATION_OF_GLYCOPROTEIN_BIOSYNTHETIC_PROCESS         | 1.07 | 0.43 | 0 | 0 | 0 | not significant |

|       |                                                               |      |      |   |   |   |                 |
|-------|---------------------------------------------------------------|------|------|---|---|---|-----------------|
| 11434 | MYLLYKANGAS_AMPLIFICATION_HOT_SPOT_8                          | 1.07 | 0.43 | 0 | 0 | 0 | not significant |
| 11435 | POMEROY_MEDULLOBLASTOMA_PROGNOSIS_UP                          | 1.07 | 0.43 | 0 | 0 | 0 | not significant |
| 11436 | REACTOME_TRANSCRIPTIONAL_REGULATION_BY_THE_AP_2_TFAP2_FA      | 1.07 | 0.43 | 0 | 0 | 0 | not significant |
| 11437 | GO_CYTOPLASMIC_SEQUESTERING_OF_PROTEIN                        | 1.07 | 0.42 | 0 | 0 | 0 | not significant |
| 11438 | GO_FORMATION_OF_CYTOPLASMIC_TRANSLATION_INITIATION_COMPLE     | 1.07 | 0.42 | 0 | 0 | 0 | not significant |
| 11439 | GO_GENETIC_IMPRINTING                                         | 1.07 | 0.42 | 0 | 0 | 0 | not significant |
| 11440 | GO_HISTONE_H2A_UBIQUITINATION                                 | 1.07 | 0.42 | 0 | 0 | 0 | not significant |
| 11441 | GO_INTRINSIC_COMPONENT_OF_POSTSYNAPTIC_SPECIALIZATION_MEMB    | 1.07 | 0.42 | 0 | 0 | 0 | not significant |
| 11442 | GO_NEGATIVE_REGULATION_OF_INTERLEUKIN_6_PRODUCTION            | 1.07 | 0.42 | 0 | 0 | 0 | not significant |
| 11443 | GO_OVULATION                                                  | 1.07 | 0.42 | 0 | 0 | 0 | not significant |
| 11444 | GO_REGULATION_OF_ENDOCYTIC_RECYCLING                          | 1.07 | 0.42 | 0 | 0 | 0 | not significant |
| 11445 | LEE_METASTASIS_AND_ALTERNATIVE_SPLICING_UP                    | 1.07 | 0.42 | 0 | 0 | 0 | not significant |
| 11446 | MAEKAWA_ATF2_TARGETS                                          | 1.07 | 0.42 | 0 | 0 | 0 | not significant |
| 11447 | XU_GH1_EXOGENOUS_TARGETS_UP                                   | 1.07 | 0.42 | 0 | 0 | 0 | not significant |
| 11448 | GO_CONVERGENT_EXTENSION                                       | 1.07 | 0.41 | 0 | 0 | 0 | not significant |
| 11449 | GO_NEURONAL_ION_CHANNEL_CLUSTERING                            | 1.07 | 0.41 | 0 | 0 | 0 | not significant |
| 11450 | GO_POSITIVE_REGULATION_OF_KILLING_OF_CELLS_OF_OTHER_ORGANI    | 1.07 | 0.41 | 0 | 0 | 0 | not significant |
| 11451 | MATZUK_MEIOTIC_AND_DNA_REPAIR                                 | 1.07 | 0.41 | 0 | 0 | 0 | not significant |
| 11452 | YAO_TEMPORAL_RESPONSE_TO_PROGESTERONE_CLUSTER_3               | 1.07 | 0.41 | 0 | 0 | 0 | not significant |
| 11453 | GO_CEREBELLAR_PURKINJE_CELL_LAYER_MORPHOGENESIS               | 1.07 | 0.40 | 0 | 0 | 0 | not significant |
| 11454 | GO_INTERMEDIATE_FILAMENT_ORGANIZATION                         | 1.07 | 0.40 | 0 | 0 | 0 | not significant |
| 11455 | GO_NEGATIVE_REGULATION_OF_PATHWAY_RESTRICTED_SMAD_PROTEI      | 1.07 | 0.40 | 0 | 0 | 0 | not significant |
| 11456 | GO_STEROID_DEHYDROGENASE_ACTIVITY                             | 1.07 | 0.40 | 0 | 0 | 0 | not significant |
| 11457 | GO_STRAND_INVASION                                            | 1.07 | 0.40 | 0 | 0 | 0 | not significant |
| 11458 | GYORFFY_DOXORUBICIN_RESISTANCE                                | 1.07 | 0.40 | 0 | 0 | 0 | not significant |
| 11459 | BAKER_HEMATOPOESIS_STAT1_TARGETS                              | 1.07 | 0.39 | 0 | 0 | 0 | not significant |
| 11460 | GO_NEGATIVE_REGULATION_OF_T_CELL_DIFFERENTIATION_IN_THYMUS    | 1.07 | 0.39 | 0 | 0 | 0 | not significant |
| 11461 | GO_POSITIVE_REGULATION_OF_MAMMARY_GLAND_EPITHELIAL_CELL_F     | 1.07 | 0.39 | 0 | 0 | 0 | not significant |
| 11462 | LIU_TOPBP1_TARGETS                                            | 1.07 | 0.39 | 0 | 0 | 0 | not significant |
| 11463 | GO_ALPHA_BETA_T_CELL_RECEPTOR_COMPLEX                         | 1.07 | 0.38 | 0 | 0 | 0 | not significant |
| 11464 | REACTOME_MET_RECEPTOR_RECYCLING                               | 1.07 | 0.38 | 0 | 0 | 0 | not significant |
| 11465 | GO_QUATERNARY_AMMONIUM_GROUP_TRANSPORT                        | 1.07 | 0.37 | 0 | 0 | 0 | not significant |
| 11466 | KRIGE_RESPONSE_TO_TOSEDOSTAT_6HR_UP                           | 1.08 | 0.66 | 0 | 0 | 0 | not significant |
| 11467 | GO_POSITIVE_REGULATION_OF_ESTABLISHMENT_OF_PROTEIN_LOCALI     | 1.08 | 0.57 | 0 | 0 | 0 | not significant |
| 11468 | GO_POSITIVE_REGULATION_OF_MAP_KINASE_ACTIVITY                 | 1.08 | 0.55 | 0 | 0 | 0 | not significant |
| 11469 | MEISSNER_NPC_HCP_WITH_H3_UNMETHYLATED                         | 1.08 | 0.54 | 0 | 0 | 0 | not significant |
| 11470 | GO_SENSORY_PERCEPTION                                         | 1.08 | 0.52 | 0 | 0 | 0 | not significant |
| 11471 | GO_RECEPTOR_REGULATOR_ACTIVITY                                | 1.08 | 0.51 | 0 | 0 | 0 | not significant |
| 11472 | REACTOME_COSTIMULATION_BY_THE_CD28_FAMILY                     | 1.08 | 0.50 | 0 | 0 | 0 | not significant |
| 11473 | REACTOME_NEGATIVE_REGULATORS_OF_DDX58_IFIH1_SIGNALING         | 1.08 | 0.49 | 0 | 0 | 0 | not significant |
| 11474 | BILANGES_RAPAMYCIN_SENSITIVE_GENES                            | 1.08 | 0.48 | 0 | 0 | 0 | not significant |
| 11475 | BROCKE_APOPTOSIS_REVERSED_BY_IL6                              | 1.08 | 0.48 | 0 | 0 | 0 | not significant |
| 11476 | GO_CYTOKINE_PRODUCTION_INVOLVED_IN_IMMUNE_RESPONSE            | 1.08 | 0.48 | 0 | 0 | 0 | not significant |
| 11477 | GO_CYTOPLASMIC_PATTERN_RECOGNITION_RECEPTOR_SIGNALING_P/      | 1.08 | 0.48 | 0 | 0 | 0 | not significant |
| 11478 | GO_EAR_MORPHOGENESIS                                          | 1.08 | 0.48 | 0 | 0 | 0 | not significant |
| 11479 | GO_REGULATION_OF_DENDRITE_MORPHOGENESIS                       | 1.08 | 0.48 | 0 | 0 | 0 | not significant |
| 11480 | GO_REGULATION_OF_EXTENT_OF_CELL_GROWTH                        | 1.08 | 0.48 | 0 | 0 | 0 | not significant |
| 11481 | CHR12Q21                                                      | 1.08 | 0.47 | 0 | 0 | 0 | not significant |
| 11482 | GO_LIPOPROTEIN_METABOLIC_PROCESS                              | 1.08 | 0.47 | 0 | 0 | 0 | not significant |
| 11483 | GO_NEGATIVE_REGULATION_OF_I_KAPPA_B_KINASE_NF_KAPPA_B_SIGNALI | 1.08 | 0.47 | 0 | 0 | 0 | not significant |
| 11484 | GO_NEGATIVE_REGULATION_OF_EPITHELIAL_CELL_DIFFERENTIATION     | 1.08 | 0.46 | 0 | 0 | 0 | not significant |
| 11485 | GO_REGULATION_OF_GLUCCONEOGENESIS                             | 1.08 | 0.46 | 0 | 0 | 0 | not significant |
| 11486 | GO_ACETYLGUCOSAMINYLTRANSFERASE_ACTIVITY                      | 1.08 | 0.45 | 0 | 0 | 0 | not significant |
| 11487 | GO_AMINE_TRANSPORT                                            | 1.08 | 0.45 | 0 | 0 | 0 | not significant |
| 11488 | GO_CYTOPLASMIC_SEQUESTERING_OF_TRANSCRIPTION_FACTOR           | 1.08 | 0.45 | 0 | 0 | 0 | not significant |
| 11489 | GO_G_PROTEIN_ALPHA_SUBUNIT_BINDING                            | 1.08 | 0.45 | 0 | 0 | 0 | not significant |
| 11490 | GO_PROTEIN_ADP_RIBOSYLATION                                   | 1.08 | 0.45 | 0 | 0 | 0 | not significant |
| 11491 | GO_REGULATION_OF_OLIGODENDROCYTE_DIFFERENTIATION              | 1.08 | 0.45 | 0 | 0 | 0 | not significant |
| 11492 | KEGG_GLYCOSYLPHOSPHATIDYLINOSITOL_GPI_ANCHOR_BIOSYNTHESIS     | 1.08 | 0.45 | 0 | 0 | 0 | not significant |
| 11493 | KEGG_PRIMARY_IMMUNODEFICIENCY                                 | 1.08 | 0.45 | 0 | 0 | 0 | not significant |
| 11494 | GO_ENDOCARDIAL_CUSHION_DEVELOPMENT                            | 1.08 | 0.44 | 0 | 0 | 0 | not significant |
| 11495 | GO_POSITIVE_REGULATION_OF_CALCIIUM_ION_DEPENDENT_EXOCYTOS     | 1.08 | 0.44 | 0 | 0 | 0 | not significant |
| 11496 | GO_STEROID_DEHYDROGENASE_ACTIVITY_ACTING_ON_THE_CH_OH_GI      | 1.08 | 0.44 | 0 | 0 | 0 | not significant |
| 11497 | GO_STRIATED_MUSCLE_CELL_PROLIFERATION                         | 1.08 | 0.44 | 0 | 0 | 0 | not significant |
| 11498 | GO_TRANSFORMING_GROWTH_FACTOR_BETA_BINDING                    | 1.08 | 0.44 | 0 | 0 | 0 | not significant |
| 11499 | REACTOME_KERATAN_SULFATE_KERATIN_METABOLISM                   | 1.08 | 0.44 | 0 | 0 | 0 | not significant |
| 11500 | REACTOME_SEMA4D_IN_SEMAPHORIN_SIGNALING                       | 1.08 | 0.44 | 0 | 0 | 0 | not significant |
| 11501 | GO_NEGATIVE_REGULATION_OF_IMMUNOGLOBULIN_PRODUCTION           | 1.08 | 0.43 | 0 | 0 | 0 | not significant |
| 11502 | GO_NEGATIVE_REGULATION_OF_INTERLEUKIN_1_BETA_SECRETION        | 1.08 | 0.43 | 0 | 0 | 0 | not significant |
| 11503 | CHEOK_RESPONSE_TO_MERCAPTOPURINE_AND_LD_MTX_DN                | 1.08 | 0.42 | 0 | 0 | 0 | not significant |
| 11504 | GO_FAT_SOLUBLE_VITAMIN_METABOLIC_PROCESS                      | 1.08 | 0.42 | 0 | 0 | 0 | not significant |
| 11505 | GO_NEGATIVE_REGULATION_OF_MEIOTIC_CELL_CYCLE                  | 1.08 | 0.42 | 0 | 0 | 0 | not significant |
| 11506 | GO_SREBP_SIGNALING_PATHWAY                                    | 1.08 | 0.42 | 0 | 0 | 0 | not significant |
| 11507 | REACTOME_COLLAGEN_BIOSYNTHESIS_AND_MODIFYING_ENZYMES          | 1.08 | 0.42 | 0 | 0 | 0 | not significant |
| 11508 | GO_CHROMATIN_MEDIATED_MAINTENANCE_OF_TRANSCRIPTION            | 1.08 | 0.41 | 0 | 0 | 0 | not significant |
| 11509 | GO_DOUBLE_STRAND_BREAK_REPAIR_VIA_BREAK_INDUCED_REPLICATI     | 1.08 | 0.41 | 0 | 0 | 0 | not significant |
| 11510 | GO_NEGATIVE_REGULATION_OF_NITRIC_OXIDE_BIOSYNTHETIC_PROCE     | 1.08 | 0.41 | 0 | 0 | 0 | not significant |
| 11511 | GO_NEGATIVE_REGULATION_OF_RECEPTOR_INTERNALIZATION            | 1.08 | 0.41 | 0 | 0 | 0 | not significant |
| 11512 | GO_POSITIVE_REGULATION_OF_CYTOKINE_SECRETION_INVOLVED_IN_I    | 1.08 | 0.41 | 0 | 0 | 0 | not significant |
| 11513 | GO_STRIATED_MUSCLE_ATROPHY                                    | 1.08 | 0.41 | 0 | 0 | 0 | not significant |
| 11514 | REACTOME_ACTIVATION_OF_PUMA_AND_TRANSLOCATION_TO_MITOCH       | 1.08 | 0.41 | 0 | 0 | 0 | not significant |
| 11515 | GO_AUTOPHAGY_OF_NUCLEUS                                       | 1.08 | 0.40 | 0 | 0 | 0 | not significant |
| 11516 | GO_MELANOSOME_ASSEMBLY                                        | 1.08 | 0.40 | 0 | 0 | 0 | not significant |
| 11517 | GO_VITAMIN_D_METABOLIC_PROCESS                                | 1.08 | 0.40 | 0 | 0 | 0 | not significant |
| 11518 | GO_LOCOMOTORY_EXPLORATION_BEHAVIOR                            | 1.08 | 0.39 | 0 | 0 | 0 | not significant |
| 11519 | GO_PLATELET_DENSE_GRANULE_LUMEN                               | 1.08 | 0.39 | 0 | 0 | 0 | not significant |
| 11520 | GO_REELIN_MEDIATED_SIGNALING_PATHWAY                          | 1.08 | 0.39 | 0 | 0 | 0 | not significant |
| 11521 | GO_X_CHROMOSOME                                               | 1.08 | 0.39 | 0 | 0 | 0 | not significant |
| 11522 | GO_INTERLEUKIN_13_SECRETION                                   | 1.08 | 0.38 | 0 | 0 | 0 | not significant |
| 11523 | GO_REGULATION_OF_TRIGLYCERIDE_METABOLIC_PROCESS               | 1.08 | 0.38 | 0 | 0 | 0 | not significant |
| 11524 | GO_NEGATIVE_REGULATION_OF_BIOSYNTHETIC_PROCESS                | 1.09 | 0.74 | 0 | 0 | 0 | not significant |
| 11525 | LIAO_METASTASIS                                               | 1.09 | 0.62 | 0 | 0 | 0 | not significant |
| 11526 | BENPORATH_EED_TARGETS                                         | 1.09 | 0.60 | 0 | 0 | 0 | not significant |
| 11527 | GO_CELLULAR_PROCESS_INVOLVED_IN_REPRODUCTION_IN_MULTICELL     | 1.09 | 0.59 | 0 | 0 | 0 | not significant |
| 11528 | HIRSCH_CELLULAR_TRANSFORMATION_SIGNATURE_UP                   | 1.09 | 0.57 | 0 | 0 | 0 | not significant |
| 11529 | GO_GLYCOSYLATION                                              | 1.09 | 0.56 | 0 | 0 | 0 | not significant |
| 11530 | GO_MONOVALENT_INORGANIC_CATION_HOMEOSTASIS                    | 1.09 | 0.54 | 0 | 0 | 0 | not significant |
| 11531 | GO_NEGATIVE_REGULATION_OF_DNA_METABOLIC_PROCESS               | 1.09 | 0.54 | 0 | 0 | 0 | not significant |
| 11532 | SENESE_HDAC1_AND_HDAC2_TARGETS_DN                             | 1.09 | 0.54 | 0 | 0 | 0 | not significant |
| 11533 | GO_NEGATIVE_REGULATION_OF_IMMUNE_RESPONSE                     | 1.09 | 0.53 | 0 | 0 | 0 | not significant |
| 11534 | GO_NEURON_PROJECTION_GUIDANCE                                 | 1.09 | 0.53 | 0 | 0 | 0 | not significant |
| 11535 | GO_RESPONSE_TO_CALCIIUM_ION                                   | 1.09 | 0.53 | 0 | 0 | 0 | not significant |
| 11536 | CHR2Q11                                                       | 1.09 | 0.51 | 0 | 0 | 0 | not significant |
| 11537 | GO_CELL_CELL_JUNCTION_ORGANIZATION                            | 1.09 | 0.51 | 0 | 0 | 0 | not significant |
| 11538 | GO_POSITIVE_REGULATION_OF_SYNAPTIC_TRANSMISSION               | 1.09 | 0.51 | 0 | 0 | 0 | not significant |
| 11539 | MISSIAGLIA_REGULATED_BY_METHYLATION_UP                        | 1.09 | 0.51 | 0 | 0 | 0 | not significant |
| 11540 | SERVITJA_LIVER_HNF1A_TARGETS_DN                               | 1.09 | 0.51 | 0 | 0 | 0 | not significant |
| 11541 | BOQUEST_STEM_CELL_UP                                          | 1.09 | 0.49 | 0 | 0 | 0 | not significant |
| 11542 | GO_IMMUNOGLOBULIN_PRODUCTION_INVOLVED_IN_IMMUNOGLOBULIN_I     | 1.09 | 0.49 | 0 | 0 | 0 | not significant |

|       |                                                                 |      |      |   |   |   |                 |
|-------|-----------------------------------------------------------------|------|------|---|---|---|-----------------|
| 11543 | GO_MAMMARY_GLAND_EPITHELIUM_DEVELOPMENT                         | 1.09 | 0.49 | 0 | 0 | 0 | not significant |
| 11544 | GO_PDZ_DOMAIN_BINDING                                           | 1.09 | 0.49 | 0 | 0 | 0 | not significant |
| 11545 | GO_POSITIVE_REGULATION_OF_OSSIFICATION                          | 1.09 | 0.49 | 0 | 0 | 0 | not significant |
| 11546 | GO_POSITIVE_REGULATION_OF_OSTEOBLAST_DIFFERENTIATION            | 1.09 | 0.49 | 0 | 0 | 0 | not significant |
| 11547 | GO_SNARE_BINDING                                                | 1.09 | 0.49 | 0 | 0 | 0 | not significant |
| 11548 | GO_STEROID_BINDING                                              | 1.09 | 0.49 | 0 | 0 | 0 | not significant |
| 11549 | GO_T_CELL_DIFFERENTIATION_IN_THYMUS                             | 1.09 | 0.49 | 0 | 0 | 0 | not significant |
| 11550 | INGRAM_SHH_TARGETS_DN                                           | 1.09 | 0.49 | 0 | 0 | 0 | not significant |
| 11551 | CLASPER_LYMPHATIC_VESSELS_DURING_METASTASIS_DN                  | 1.09 | 0.48 | 0 | 0 | 0 | not significant |
| 11552 | GO_INOSITOL_PHOSPHATE_BIOSYNTHETIC_PROCESS                      | 1.09 | 0.48 | 0 | 0 | 0 | not significant |
| 11553 | GO_POSITIVE_REGULATION_OF_INTRINSIC_APOPTOTIC_SIGNALING_PATHWAY | 1.09 | 0.48 | 0 | 0 | 0 | not significant |
| 11554 | GO_TRANSCRIPTION_COFACTOR_BINDING                               | 1.09 | 0.48 | 0 | 0 | 0 | not significant |
| 11555 | MANTOVANI_VIRAL_GPCR_SIGNALING_UP                               | 1.09 | 0.48 | 0 | 0 | 0 | not significant |
| 11556 | OLSSON_EZF3_TARGETS_DN                                          | 1.09 | 0.48 | 0 | 0 | 0 | not significant |
| 11557 | GO_COLLAGEN_TRIMER                                              | 1.09 | 0.47 | 0 | 0 | 0 | not significant |
| 11558 | GO_ENDOSOME_TO_LYSOSOME_TRANSPORT                               | 1.09 | 0.47 | 0 | 0 | 0 | not significant |
| 11559 | GO_ENERGY_HOMEOSTASIS                                           | 1.09 | 0.47 | 0 | 0 | 0 | not significant |
| 11560 | WILENSKY_RESPONSE_TO_DARAPLADIB                                 | 1.09 | 0.47 | 0 | 0 | 0 | not significant |
| 11561 | CHR4P15                                                         | 1.09 | 0.46 | 0 | 0 | 0 | not significant |
| 11562 | GO_RESPONSE_TO_ATP                                              | 1.09 | 0.46 | 0 | 0 | 0 | not significant |
| 11563 | CHR5Q21                                                         | 1.09 | 0.45 | 0 | 0 | 0 | not significant |
| 11564 | GO_CERAMIDE_CATABOLIC_PROCESS                                   | 1.09 | 0.45 | 0 | 0 | 0 | not significant |
| 11565 | GO_NEGATIVE_REGULATION_OF_CARDIAC_MUSCLE_TISSUE_GROWTH          | 1.09 | 0.45 | 0 | 0 | 0 | not significant |
| 11566 | GO_POSITIVE_REGULATION_OF_DENDRITIC_SPINE_MORPHOGENESIS         | 1.09 | 0.45 | 0 | 0 | 0 | not significant |
| 11567 | GO_TAU_PROTEIN_KINASE_ACTIVITY                                  | 1.09 | 0.45 | 0 | 0 | 0 | not significant |
| 11568 | WANG_METHYLATED_IN_BREAST_CANCER                                | 1.09 | 0.45 | 0 | 0 | 0 | not significant |
| 11569 | BRACHAT_RESPONSE_TO_CISPLATIN                                   | 1.09 | 0.44 | 0 | 0 | 0 | not significant |
| 11570 | GO_REGULATION_OF_PROTEIN_GLYCOSYLATION                          | 1.09 | 0.44 | 0 | 0 | 0 | not significant |
| 11571 | SIMBULAN_PARP1_TARGETS_UP                                       | 1.09 | 0.44 | 0 | 0 | 0 | not significant |
| 11572 | BIOCARTA_AKAPCENTROSOME_PATHWAY                                 | 1.09 | 0.43 | 0 | 0 | 0 | not significant |
| 11573 | GO_CELLULAR_RESPONSE_TO_MURAMYL_DIPEPTIDE                       | 1.09 | 0.43 | 0 | 0 | 0 | not significant |
| 11574 | GO_PLATELET_DERIVED_GROWTH_FACTOR_RECEPTOR_BETA_SIGNAL          | 1.09 | 0.43 | 0 | 0 | 0 | not significant |
| 11575 | GO_REGULATION_OF_CALCIUM_ION_IMPORT                             | 1.09 | 0.43 | 0 | 0 | 0 | not significant |
| 11576 | BIOCARTA_IL10_PATHWAY                                           | 1.09 | 0.42 | 0 | 0 | 0 | not significant |
| 11577 | GO_ACTIN_FILAMENT_REORGANIZATION                                | 1.09 | 0.42 | 0 | 0 | 0 | not significant |
| 11578 | GO_CERAMIDE_TRANSPORTER_ACTIVITY                                | 1.09 | 0.42 | 0 | 0 | 0 | not significant |
| 11579 | GO_EUCHROMATIN                                                  | 1.09 | 0.42 | 0 | 0 | 0 | not significant |
| 11580 | GO_RNA_POLYMERASE_II_INTRONIC_TRANSCRIPTION_REGULATORY_REGION   | 1.09 | 0.42 | 0 | 0 | 0 | not significant |
| 11581 | WEBER_METHYLATED_HCP_IN_FIBROBLAST_DN                           | 1.09 | 0.42 | 0 | 0 | 0 | not significant |
| 11582 | GO_NEUROBLAST_DIVISION                                          | 1.09 | 0.41 | 0 | 0 | 0 | not significant |
| 11583 | GO_MITRAL_VALVE_DEVELOPMENT                                     | 1.09 | 0.40 | 0 | 0 | 0 | not significant |
| 11584 | GO_THALAMUS_DEVELOPMENT                                         | 1.09 | 0.40 | 0 | 0 | 0 | not significant |
| 11585 | BIOCARTA_NOTCH_PATHWAY                                          | 1.09 | 0.39 | 0 | 0 | 0 | not significant |
| 11586 | BLALOCK_ALZHEIMERS_DISEASE_UP                                   | 1.10 | 0.93 | 0 | 0 | 0 | not significant |
| 11587 | REACTOME_GENERIC_TRANSCRIPTION_PATHWAY                          | 1.10 | 0.81 | 0 | 0 | 0 | not significant |
| 11588 | GRAESSMANN_RESPONSE_TO_MC_AND_DOXORUBICIN_UP                    | 1.10 | 0.68 | 0 | 0 | 0 | not significant |
| 11589 | LIM_MAMMARY_STEM_CELL_DN                                        | 1.10 | 0.64 | 0 | 0 | 0 | not significant |
| 11590 | GAZDA_DIAMOND_BLACKFAN_ANEMIA_ERYTHROID_DN                      | 1.10 | 0.63 | 0 | 0 | 0 | not significant |
| 11591 | GO_NEGATIVE_REGULATION_OF_IMMUNE_SYSTEM_PROCESS                 | 1.10 | 0.62 | 0 | 0 | 0 | not significant |
| 11592 | CREIGHTON_ENDOCRINE_THERAPY_RESISTANCE_2                        | 1.10 | 0.60 | 0 | 0 | 0 | not significant |
| 11593 | HADDAD_B_LYMPHOCYTE_PROGENITOR                                  | 1.10 | 0.60 | 0 | 0 | 0 | not significant |
| 11594 | SMID_BREAST_CANCER_BASAL_DN                                     | 1.10 | 0.60 | 0 | 0 | 0 | not significant |
| 11595 | MCCABE_BOUND_BY_HOXC6                                           | 1.10 | 0.58 | 0 | 0 | 0 | not significant |
| 11596 | CHR17Q21                                                        | 1.10 | 0.57 | 0 | 0 | 0 | not significant |
| 11597 | PLASARI_TGFB1_TARGETS_10HR_DN                                   | 1.10 | 0.57 | 0 | 0 | 0 | not significant |
| 11598 | SHEDDEN_LUNG_CANCER_GOOD_SURVIVAL_A12                           | 1.10 | 0.57 | 0 | 0 | 0 | not significant |
| 11599 | GO_ENDOPLASMIC_RETICULUM_LUMEN                                  | 1.10 | 0.56 | 0 | 0 | 0 | not significant |
| 11600 | HUANG_GATA2_TARGETS_UP                                          | 1.10 | 0.55 | 0 | 0 | 0 | not significant |
| 11601 | GO_G_PROTEIN_COUPLED_RECEPTOR_BINDING                           | 1.10 | 0.54 | 0 | 0 | 0 | not significant |
| 11602 | GO_MALE_SEX_DIFFERENTIATION                                     | 1.10 | 0.53 | 0 | 0 | 0 | not significant |
| 11603 | ZHANG_TLX_TARGETS_UP                                            | 1.10 | 0.53 | 0 | 0 | 0 | not significant |
| 11604 | GO_HOMOPHILIC_CELL_ADHESION_VIA_PLASMA_MEMBRANE_ADHESION        | 1.10 | 0.52 | 0 | 0 | 0 | not significant |
| 11605 | GO_SINGLE_FERTILIZATION                                         | 1.10 | 0.52 | 0 | 0 | 0 | not significant |
| 11606 | GENTILE_UV_RESPONSE_CLUSTER_D6                                  | 1.10 | 0.51 | 0 | 0 | 0 | not significant |
| 11607 | GO_GLYCOGEN_BIOSYNTHETIC_PROCESS                                | 1.10 | 0.51 | 0 | 0 | 0 | not significant |
| 11608 | GO_RECEPTOR_LOCALIZATION_TO_SYNAPSE                             | 1.10 | 0.51 | 0 | 0 | 0 | not significant |
| 11609 | GO_REGULATION_OF_OSTEOBLAST_DIFFERENTIATION                     | 1.10 | 0.51 | 0 | 0 | 0 | not significant |
| 11610 | GO_REGULATION_OF_PHOSPHOLIPASE_ACTIVITY                         | 1.10 | 0.51 | 0 | 0 | 0 | not significant |
| 11611 | CHR18P11                                                        | 1.10 | 0.50 | 0 | 0 | 0 | not significant |
| 11612 | KRAS.LUNG.BREAST_UP.V1_DN                                       | 1.10 | 0.50 | 0 | 0 | 0 | not significant |
| 11613 | CHR20P11                                                        | 1.10 | 0.49 | 0 | 0 | 0 | not significant |
| 11614 | GO_POLYSACCHARIDE_BIOSYNTHETIC_PROCESS                          | 1.10 | 0.49 | 0 | 0 | 0 | not significant |
| 11615 | REACTOME_SIGNAL_TRANSDUCTION_BY_L1                              | 1.10 | 0.49 | 0 | 0 | 0 | not significant |
| 11616 | CHR10Q4                                                         | 1.10 | 0.48 | 0 | 0 | 0 | not significant |
| 11617 | GO_UBIQUITIN_CONJUGATING_ENZYME_BINDING                         | 1.10 | 0.48 | 0 | 0 | 0 | not significant |
| 11618 | KEGG_BASAL_CELL_CARCINOMA                                       | 1.10 | 0.48 | 0 | 0 | 0 | not significant |
| 11619 | REACTOME_ASSEMBLY_AND_CELL_SURFACE_PRESENTATION_OF_NMD          | 1.10 | 0.48 | 0 | 0 | 0 | not significant |
| 11620 | CHR9P24                                                         | 1.10 | 0.47 | 0 | 0 | 0 | not significant |
| 11621 | GO_ENDOPLASMIC_RETICULUM_MANNANOSE_TRIMMING                     | 1.10 | 0.47 | 0 | 0 | 0 | not significant |
| 11622 | GO_INTERLEUKIN_6_SECRETION                                      | 1.10 | 0.47 | 0 | 0 | 0 | not significant |
| 11623 | GO_MACROPHAGE_CHEMOTAXIS                                        | 1.10 | 0.47 | 0 | 0 | 0 | not significant |
| 11624 | GO_SYNAPTIC_TRANSMISSION_GlutAMATERGIC                          | 1.10 | 0.47 | 0 | 0 | 0 | not significant |
| 11625 | GO_TUMOR_NECROSIS_FACTOR_BIOSYNTHETIC_PROCESS                   | 1.10 | 0.47 | 0 | 0 | 0 | not significant |
| 11626 | KYNG_RESPONSE_TO_H2O2_VIA_ERCC6                                 | 1.10 | 0.47 | 0 | 0 | 0 | not significant |
| 11627 | LIN_SILENCED_BY_TUMOR_MICROENVIRONMENT                          | 1.10 | 0.47 | 0 | 0 | 0 | not significant |
| 11628 | REACTOME_LISTERIA_MONOCYTOGENESIS_ENTRY_INTO_HOST_CELLS         | 1.10 | 0.47 | 0 | 0 | 0 | not significant |
| 11629 | GO_HEPATOCYTE_GROWTH_FACTOR_RECEPTOR_SIGNALING_PATHWAY          | 1.10 | 0.46 | 0 | 0 | 0 | not significant |
| 11630 | GO_NEGATIVE_REGULATION_OF_B_CELL_ACTIVATION                     | 1.10 | 0.46 | 0 | 0 | 0 | not significant |
| 11631 | GO_POSITIVE_REGULATION_OF_PROTEIN_OLIGOMERIZATION               | 1.10 | 0.46 | 0 | 0 | 0 | not significant |
| 11632 | GO_REGULATION_OF_CD4_POSITIVE_ALPHA_BETA_T_CELL_DIFFERENTIATION | 1.10 | 0.46 | 0 | 0 | 0 | not significant |
| 11633 | GO_STEROID_CATABOLIC_PROCESS                                    | 1.10 | 0.46 | 0 | 0 | 0 | not significant |
| 11634 | REACTOME_LAMININ_INTERACTIONS                                   | 1.10 | 0.46 | 0 | 0 | 0 | not significant |
| 11635 | GO_CHORION_DEVELOPMENT                                          | 1.10 | 0.45 | 0 | 0 | 0 | not significant |
| 11636 | GO_LONG_TERM_SYNAPTIC_DEPRESSION                                | 1.10 | 0.45 | 0 | 0 | 0 | not significant |
| 11637 | GO_NATURAL_KILLER_CELL_ACTIVATION_INVOLVED_IN_IMMUNE_RESPONSE   | 1.10 | 0.45 | 0 | 0 | 0 | not significant |
| 11638 | GO_PHOSPHATE_ION_TRANSMEMBRANE_TRANSPORT                        | 1.10 | 0.45 | 0 | 0 | 0 | not significant |
| 11639 | REACTOME_DOWNREGULATION_OF_ERBB2_ERBB3_SIGNALING                | 1.10 | 0.45 | 0 | 0 | 0 | not significant |
| 11640 | REACTOME_SHC1_EVENTS_IN_ERBB2_SIGNALING                         | 1.10 | 0.45 | 0 | 0 | 0 | not significant |
| 11641 | GO_MANNANOSE_BINDING                                            | 1.10 | 0.44 | 0 | 0 | 0 | not significant |
| 11642 | GO_NEGATIVE_REGULATION_OF_CALCINEURIN_MEDIATED_SIGNALING        | 1.10 | 0.44 | 0 | 0 | 0 | not significant |
| 11643 | GO_OXIDIZED_BASE_LESION_DNA_N_GLYCOSYLASE_ACTIVITY              | 1.10 | 0.44 | 0 | 0 | 0 | not significant |
| 11644 | GO_POSITIVE_REGULATION_OF_INFLAMMATORY_RESPONSE_TO_ANTIGEN      | 1.10 | 0.44 | 0 | 0 | 0 | not significant |
| 11645 | RUNNE_GENDER_EFFECT_UP                                          | 1.10 | 0.44 | 0 | 0 | 0 | not significant |
| 11646 | GO_CALCIUM_CATION_ANTIPORTER_ACTIVITY                           | 1.10 | 0.43 | 0 | 0 | 0 | not significant |
| 11647 | GO_EXTRAEMBRYONIC_MEMBRANE_DEVELOPMENT                          | 1.10 | 0.43 | 0 | 0 | 0 | not significant |
| 11648 | GO_MARGINAL_ZONE_B_CELL_DIFFERENTIATION                         | 1.10 | 0.43 | 0 | 0 | 0 | not significant |
| 11649 | GO_REGULATION_OF_KILLING_OF_CELLS_OF_OTHER_ORGANISM             | 1.10 | 0.43 | 0 | 0 | 0 | not significant |
| 11650 | GO_REGULATION_OF_POSTSYNAPTIC_NEUROTRANSMITTER_RECEPTOR_BINDING | 1.10 | 0.42 | 0 | 0 | 0 | not significant |
| 11651 | GO_ADP_RIBOSYLATION_FACTOR_BINDING                              | 1.10 | 0.41 | 0 | 0 | 0 | not significant |

|       |                                                           |      |      |   |   |   |                 |
|-------|-----------------------------------------------------------|------|------|---|---|---|-----------------|
| 11652 | GO_CYTOSKELETAL_ANCHORING_AT_PLASMA_MEMBRANE              | 1.10 | 0.41 | 0 | 0 | 0 | not significant |
| 11653 | GO_HISTONE_H3_K27_DEMETHYLATION                           | 1.10 | 0.40 | 0 | 0 | 0 | not significant |
| 11654 | GO_REGULATION_OF_BLOOD_VESSEL_REMODELING                  | 1.10 | 0.40 | 0 | 0 | 0 | not significant |
| 11655 | GO_PROTEIN_LOCALIZATION_TO_MEMBRANE                       | 1.11 | 0.74 | 0 | 0 | 0 | not significant |
| 11656 | GO_LYMPHOCYTE_ACTIVATION                                  | 1.11 | 0.72 | 0 | 0 | 0 | not significant |
| 11657 | CHR22Q13                                                  | 1.11 | 0.63 | 0 | 0 | 0 | not significant |
| 11658 | GO_REGULATION_OF_PEPTIDYL_TYROSINE_PHOSPHORYLATION        | 1.11 | 0.61 | 0 | 0 | 0 | not significant |
| 11659 | KEGG_CALCIIUM_SIGNALING_PATHWAY                           | 1.11 | 0.60 | 0 | 0 | 0 | not significant |
| 11660 | CHR8Q24                                                   | 1.11 | 0.59 | 0 | 0 | 0 | not significant |
| 11661 | CHR11Q13                                                  | 1.11 | 0.57 | 0 | 0 | 0 | not significant |
| 11662 | GO_NEGATIVE_REGULATION_OF_DEFENSE_RESPONSE                | 1.11 | 0.56 | 0 | 0 | 0 | not significant |
| 11663 | RB_P107_DNV1_UP                                           | 1.11 | 0.56 | 0 | 0 | 0 | not significant |
| 11664 | GO_REGULATION_OF_LEUKOCYTE_MEDIATED_IMMUNITY              | 1.11 | 0.55 | 0 | 0 | 0 | not significant |
| 11665 | GO_POSITIVE_REGULATION_OF_CYTOKINE_SECRETION              | 1.11 | 0.54 | 0 | 0 | 0 | not significant |
| 11666 | REACTOME_NEGATIVE_REGULATION_OF_THE_PI3K_AKT_NETWORK      | 1.11 | 0.54 | 0 | 0 | 0 | not significant |
| 11667 | BOHN_PRIMARY_IMMUNODEFICIENCY_SYNDROM_UP                  | 1.11 | 0.53 | 0 | 0 | 0 | not significant |
| 11668 | PID_AP1_PATHWAY                                           | 1.11 | 0.53 | 0 | 0 | 0 | not significant |
| 11669 | PID_ECADHERIN_NASCENT_AJ_PATHWAY                          | 1.11 | 0.53 | 0 | 0 | 0 | not significant |
| 11670 | REACTOME_TRANSCRIPTIONAL_REGULATION_BY_E2F6               | 1.11 | 0.53 | 0 | 0 | 0 | not significant |
| 11671 | GO_BASE_EXCISION_REPAIR                                   | 1.11 | 0.52 | 0 | 0 | 0 | not significant |
| 11672 | GO_MITOGEN_ACTIVATED_PROTEIN_KINASE_BINDING               | 1.11 | 0.52 | 0 | 0 | 0 | not significant |
| 11673 | GO_REGULATION_OF_POLYSACCHARIDE_METABOLIC_PROCESS         | 1.11 | 0.52 | 0 | 0 | 0 | not significant |
| 11674 | KONDO_PROSTATE_CANCER_WITH_H3K27ME3                       | 1.11 | 0.52 | 0 | 0 | 0 | not significant |
| 11675 | WANG_BARRETTES_ESOPHAGUS_UP                               | 1.11 | 0.52 | 0 | 0 | 0 | not significant |
| 11676 | GO_DETOXIFICATION                                         | 1.11 | 0.51 | 0 | 0 | 0 | not significant |
| 11677 | GO_NEGATIVE_REGULATION_OF_GLUONEOGENESIS                  | 1.11 | 0.51 | 0 | 0 | 0 | not significant |
| 11678 | GO_NEGATIVE_REGULATION_OF_SMALL_MOLECULE_METABOLIC_PROC   | 1.11 | 0.51 | 0 | 0 | 0 | not significant |
| 11679 | GO_POSITIVE_REGULATION_OF_CILIIUM_ASSEMBLY                | 1.11 | 0.51 | 0 | 0 | 0 | not significant |
| 11680 | VANHARANTA_UTERINE_FIBROID_DN                             | 1.11 | 0.51 | 0 | 0 | 0 | not significant |
| 11681 | CHR11Q21                                                  | 1.11 | 0.50 | 0 | 0 | 0 | not significant |
| 11682 | GO_DNA_REPLICATION_INITIATION                             | 1.11 | 0.50 | 0 | 0 | 0 | not significant |
| 11683 | GO_PROTEIN_PALMITOYLATION                                 | 1.11 | 0.50 | 0 | 0 | 0 | not significant |
| 11684 | PID_BMP_PATHWAY                                           | 1.11 | 0.50 | 0 | 0 | 0 | not significant |
| 11685 | GO_GTP_RHO_BINDING                                        | 1.11 | 0.49 | 0 | 0 | 0 | not significant |
| 11686 | REACTOME_INLB_MEDIATED_ENTRY_OF_LISTERIA_MONOCYTOGENES_I  | 1.11 | 0.49 | 0 | 0 | 0 | not significant |
| 11687 | GO_APOPTOTIC_PROCESS_INVOLVED_IN_DEVELOPMENT              | 1.11 | 0.48 | 0 | 0 | 0 | not significant |
| 11688 | GO_POSITIVE_REGULATION_OF_ALPHA_BETA_T_CELL_PROLIFERATION | 1.11 | 0.48 | 0 | 0 | 0 | not significant |
| 11689 | GO_PROTEIN_POLY_ADP_RIBOSYLATION                          | 1.11 | 0.48 | 0 | 0 | 0 | not significant |
| 11690 | GO_METALLOCARBOXYPEPTIDASE_ACTIVITY                       | 1.11 | 0.47 | 0 | 0 | 0 | not significant |
| 11691 | GO_PHOSPHATIDYLCHOLINE_METABOLIC_PROCESS                  | 1.11 | 0.47 | 0 | 0 | 0 | not significant |
| 11692 | GUENTHER_GROWTH_SPHERICAL_VS_ADHERENT_UP                  | 1.11 | 0.47 | 0 | 0 | 0 | not significant |
| 11693 | REACTOME_SIGNAL_ATTENUATION                               | 1.11 | 0.47 | 0 | 0 | 0 | not significant |
| 11694 | CHR13Q33                                                  | 1.11 | 0.46 | 0 | 0 | 0 | not significant |
| 11695 | GO_EMBRYONIC_PLACENTA_MORPHOGENESIS                       | 1.11 | 0.46 | 0 | 0 | 0 | not significant |
| 11696 | GO_EXPORT_ACROSS_PLASMA_MEMBRANE                          | 1.11 | 0.46 | 0 | 0 | 0 | not significant |
| 11697 | GO_NEGATIVE_REGULATION_OF_PLATELET_ACTIVATION             | 1.11 | 0.46 | 0 | 0 | 0 | not significant |
| 11698 | GO_PROTEIN_LOCALIZATION_TO_BASOLATERAL_PLASMA_MEMBRANE    | 1.11 | 0.46 | 0 | 0 | 0 | not significant |
| 11699 | GO_CEREBELLAR_PURKINJE_CELL_LAYER_FORMATION               | 1.11 | 0.44 | 0 | 0 | 0 | not significant |
| 11700 | GO_RNA_STRAND_ANNEALING_ACTIVITY                          | 1.11 | 0.44 | 0 | 0 | 0 | not significant |
| 11701 | GO_T_CELL_RECEPTOR_BINDING                                | 1.11 | 0.44 | 0 | 0 | 0 | not significant |
| 11702 | GO_TRANSFORMING_GROWTH_FACTOR_BETA_ACTIVATION             | 1.11 | 0.44 | 0 | 0 | 0 | not significant |
| 11703 | ONGUSAHA_BRCA1_TARGETS_UP                                 | 1.11 | 0.44 | 0 | 0 | 0 | not significant |
| 11704 | GO_DENSE_CORE_GRANULE                                     | 1.11 | 0.43 | 0 | 0 | 0 | not significant |
| 11705 | GO_HISTONE_DEMETHYLASE_ACTIVITY_H3_K27_SPECIFIC           | 1.11 | 0.43 | 0 | 0 | 0 | not significant |
| 11706 | GO_NEGATIVE_REGULATION_OF_ACTIVIN_RECEPTOR_SIGNALING_PATH | 1.11 | 0.43 | 0 | 0 | 0 | not significant |
| 11707 | REACTOME_CDC6_ASSOCIATION_WITH_THE_ORC_ORIGIN_COMPLEX     | 1.11 | 0.43 | 0 | 0 | 0 | not significant |
| 11708 | GO_CELLULAR_RESPONSE_TO_POTASSIUM_ION                     | 1.11 | 0.39 | 0 | 0 | 0 | not significant |
| 11709 | GO_REGULATION_OF_TRANS_SYNAPTIC_SIGNALING                 | 1.12 | 0.72 | 0 | 0 | 0 | not significant |
| 11710 | GO_PROXIMAL_PROMOTER_SEQUENCE_SPECIFIC_DNA_BINDING        | 1.12 | 0.69 | 0 | 0 | 0 | not significant |
| 11711 | GO_REGULATION_OF_LEUKOCYTE_DIFFERENTIATION                | 1.12 | 0.69 | 0 | 0 | 0 | not significant |
| 11712 | CHARAFE_BREAST_CANCER_LUMINAL_VS_BASAL_UP                 | 1.12 | 0.68 | 0 | 0 | 0 | not significant |
| 11713 | STK33_NOMO_UP                                             | 1.12 | 0.68 | 0 | 0 | 0 | not significant |
| 11714 | GO_REGULATION_OF_T_CELL_ACTIVATION                        | 1.12 | 0.66 | 0 | 0 | 0 | not significant |
| 11715 | LEE_DIFFERENTIATING_T_LYMPHOCYTE                          | 1.12 | 0.63 | 0 | 0 | 0 | not significant |
| 11716 | PODAR_RESPONSE_TO_ADAPHOSTIN_UP                           | 1.12 | 0.60 | 0 | 0 | 0 | not significant |
| 11717 | GO_B_CELL_ACTIVATION_INVOLVED_IN_IMMUNE_RESPONSE          | 1.12 | 0.58 | 0 | 0 | 0 | not significant |
| 11718 | GO_G_PROTEIN_COUPLED_RECEPTOR_ACTIVITY                    | 1.12 | 0.58 | 0 | 0 | 0 | not significant |
| 11719 | GO_POSITIVE_REGULATION_OF_ACTIN_FILAMENT_POLYMERIZATION   | 1.12 | 0.58 | 0 | 0 | 0 | not significant |
| 11720 | HALLMARK_KRAS_SIGNALING_DN                                | 1.12 | 0.58 | 0 | 0 | 0 | not significant |
| 11721 | GO_REGULATION_OF_DNA_DEPENDENT_DNA_REPLICATION            | 1.12 | 0.57 | 0 | 0 | 0 | not significant |
| 11722 | GO_CELLULAR_RESPONSE_TO_ALCOHOL                           | 1.12 | 0.56 | 0 | 0 | 0 | not significant |
| 11723 | RADAEVA_RESPONSE_TO_IFNA1_UP                              | 1.12 | 0.56 | 0 | 0 | 0 | not significant |
| 11724 | GO_LYMPHOCYTE_HOMEOSTASIS                                 | 1.12 | 0.55 | 0 | 0 | 0 | not significant |
| 11725 | GO_POSITIVE_REGULATION_OF_CELL_KILLING                    | 1.12 | 0.55 | 0 | 0 | 0 | not significant |
| 11726 | GO_REGULATION_OF_POSTSYNAPTIC_MEMBRANE_POTENTIAL          | 1.12 | 0.55 | 0 | 0 | 0 | not significant |
| 11727 | GO_MEMBRANE_INVAGINATION                                  | 1.12 | 0.54 | 0 | 0 | 0 | not significant |
| 11728 | GO_NEGATIVE_REGULATION_OF_T_CELL_PROLIFERATION            | 1.12 | 0.54 | 0 | 0 | 0 | not significant |
| 11729 | RELA_DNV1_DN                                              | 1.12 | 0.54 | 0 | 0 | 0 | not significant |
| 11730 | GO_REGULATION_OF_CELL_AGING                               | 1.12 | 0.53 | 0 | 0 | 0 | not significant |
| 11731 | REACTOME_RUNX1_INTERACTS_WITH_CO_FACTORS_WHOSE_PRECISE    | 1.12 | 0.53 | 0 | 0 | 0 | not significant |
| 11732 | GO_CELLULAR_RESPONSE_TO_RETINOIC_ACID                     | 1.12 | 0.52 | 0 | 0 | 0 | not significant |
| 11733 | GO_GOLGI_TO_ENDOSOME_TRANSPORT                            | 1.12 | 0.52 | 0 | 0 | 0 | not significant |
| 11734 | GO_SOMATIC_RECOMBINATION_OF_IMMUNOGLOBULIN_GENE_SEGMENT   | 1.12 | 0.52 | 0 | 0 | 0 | not significant |
| 11735 | KIM_ALL_DISORDERS_OLIGODENDROCYTE_NUMBER_CORR_DN          | 1.12 | 0.52 | 0 | 0 | 0 | not significant |
| 11736 | REACTOME_REGULATION_OF_INSULIN_LIKE_GROWTH_FACTOR_IGF_TR  | 1.12 | 0.52 | 0 | 0 | 0 | not significant |
| 11737 | GO_NADPLUS_ADP_RIBOSYLTRANSFERASE_ACTIVITY                | 1.12 | 0.51 | 0 | 0 | 0 | not significant |
| 11738 | GO_POSITIVE_REGULATION_OF_PROTEIN_TARGETING_TO_MITOCHOND  | 1.12 | 0.51 | 0 | 0 | 0 | not significant |
| 11739 | GO_AXONAL_FASCICULATION                                   | 1.12 | 0.50 | 0 | 0 | 0 | not significant |
| 11740 | GO_ORGANELLE_MEMBRANE_CONTACT_SITE                        | 1.12 | 0.50 | 0 | 0 | 0 | not significant |
| 11741 | GO_POSITIVE_REGULATION_OF_EPITHELIAL_CELL_DIFFERENTIATION | 1.12 | 0.50 | 0 | 0 | 0 | not significant |
| 11742 | GO_PROTEIN_MANNOSYLATION                                  | 1.12 | 0.50 | 0 | 0 | 0 | not significant |
| 11743 | GO_PROTEIN_TRANSPORT_WITHIN_PLASMA_MEMBRANE               | 1.12 | 0.50 | 0 | 0 | 0 | not significant |
| 11744 | GO_REGULATION_OF_T_CELL_DIFFERENTIATION_IN_THYMUS         | 1.12 | 0.50 | 0 | 0 | 0 | not significant |
| 11745 | MEISSNER_ES_ICP_WITH_H3K4ME3                              | 1.12 | 0.50 | 0 | 0 | 0 | not significant |
| 11746 | BIOCARTA_P53_PATHWAY                                      | 1.12 | 0.49 | 0 | 0 | 0 | not significant |
| 11747 | GO_CYCLIC_NUCLEOTIDE_BINDING                              | 1.12 | 0.49 | 0 | 0 | 0 | not significant |
| 11748 | KEGG_GLYCOSAMINOGLYCAN_DEGRADATION                        | 1.12 | 0.49 | 0 | 0 | 0 | not significant |
| 11749 | GAUSSMANN_MLL_AF4_FUSION_TARGETS_D_UP                     | 1.12 | 0.48 | 0 | 0 | 0 | not significant |
| 11750 | GO_DICARBOXYLIC_ACID_CATABOLIC_PROCESS                    | 1.12 | 0.48 | 0 | 0 | 0 | not significant |
| 11751 | GO_METANEPHROS_MORPHOGENESIS                              | 1.12 | 0.48 | 0 | 0 | 0 | not significant |
| 11752 | GO_TRANSPPOSITION                                         | 1.12 | 0.48 | 0 | 0 | 0 | not significant |
| 11753 | GO_WHITE_FAT_CELL_DIFFERENTIATION                         | 1.12 | 0.48 | 0 | 0 | 0 | not significant |
| 11754 | MATHEW_FANCONI_ANEMIA_GENES                               | 1.12 | 0.48 | 0 | 0 | 0 | not significant |
| 11755 | REACTOME_SUMOYLATION_OF_TRANSCRIPTION_FACTORS             | 1.12 | 0.48 | 0 | 0 | 0 | not significant |
| 11756 | TONKS_TARGETS_OF_RUNX1_RUNX1T1_FUSION GRANULOCYTE_DN      | 1.12 | 0.48 | 0 | 0 | 0 | not significant |
| 11757 | YANG_BREAST_CANCER_ESR1_DN                                | 1.12 | 0.48 | 0 | 0 | 0 | not significant |
| 11758 | GO_PROTEIN_POLYGLUTAMYLATION                              | 1.12 | 0.47 | 0 | 0 | 0 | not significant |
| 11759 | GO_REGULATION_OF_DNA_LIGATION                             | 1.12 | 0.47 | 0 | 0 | 0 | not significant |
| 11760 | GO_AMMONIUM_TRANSMEMBRANE_TRANSPORTER_ACTIVITY            | 1.12 | 0.46 | 0 | 0 | 0 | not significant |

|       |                                                              |      |      |   |   |   |                 |
|-------|--------------------------------------------------------------|------|------|---|---|---|-----------------|
| 11761 | GO ANTIGEN PROCESSING AND PRESENTATION OF LIPID ANTIGEN V    | 1.12 | 0.46 | 0 | 0 | 0 | not significant |
| 11762 | GO_MEMBRANE_RAFT_LOCALIZATION                                | 1.12 | 0.46 | 0 | 0 | 0 | not significant |
| 11763 | GO_MICROFIBRIL                                               | 1.12 | 0.46 | 0 | 0 | 0 | not significant |
| 11764 | GO_SPONGIOTROPHOBLAST_LAYER_DEVELOPMENT                      | 1.12 | 0.46 | 0 | 0 | 0 | not significant |
| 11765 | GO_NEGATIVE_REGULATION_OF_ACTIVATED_T_CELL_PROLIFERATION     | 1.12 | 0.45 | 0 | 0 | 0 | not significant |
| 11766 | MYLLYKANGAS_AMPLIFICATION_HOT_SPOT_9                         | 1.12 | 0.45 | 0 | 0 | 0 | not significant |
| 11767 | REACTOME_CLECTA_INFLAMMASOME_PATHWAY                         | 1.12 | 0.44 | 0 | 0 | 0 | not significant |
| 11768 | CUL_TCF21_TARGETS_2_DN                                       | 1.13 | 0.86 | 0 | 0 | 0 | not significant |
| 11769 | GO_SEXUAL_REPRODUCTION                                       | 1.13 | 0.85 | 0 | 0 | 0 | not significant |
| 11770 | GO_GAMETE_GENERATION                                         | 1.13 | 0.79 | 0 | 0 | 0 | not significant |
| 11771 | ZHENG_BOUND_BY_FOXP3                                         | 1.13 | 0.78 | 0 | 0 | 0 | not significant |
| 11772 | HELLER_HDAC_TARGETS_UP                                       | 1.13 | 0.76 | 0 | 0 | 0 | not significant |
| 11773 | STK33_UP                                                     | 1.13 | 0.70 | 0 | 0 | 0 | not significant |
| 11774 | GO_PLASMA_MEMBRANE_RECEPTOR_COMPLEX                          | 1.13 | 0.65 | 0 | 0 | 0 | not significant |
| 11775 | GO_DEVELOPMENTAL_MATURATION                                  | 1.13 | 0.64 | 0 | 0 | 0 | not significant |
| 11776 | LIU_SOX4_TARGETS_UP                                          | 1.13 | 0.64 | 0 | 0 | 0 | not significant |
| 11777 | GO_ACTIN_FILAMENT_POLYMERIZATION                             | 1.13 | 0.63 | 0 | 0 | 0 | not significant |
| 11778 | GO_NEGATIVE_REGULATION_OF_HEMOPOIESIS                        | 1.13 | 0.62 | 0 | 0 | 0 | not significant |
| 11779 | CHEN_LVAD_SUPPORT_OF_FAILING_HEART_UP                        | 1.13 | 0.59 | 0 | 0 | 0 | not significant |
| 11780 | GO_CELL_MATURATION                                           | 1.13 | 0.59 | 0 | 0 | 0 | not significant |
| 11781 | FIGUEROA_AML_METHYLATION_CLUSTER_4_UP                        | 1.13 | 0.58 | 0 | 0 | 0 | not significant |
| 11782 | REACTOME_GLYCOSAMINOGLYCAN_METABOLISM                        | 1.13 | 0.58 | 0 | 0 | 0 | not significant |
| 11783 | GO_PROTEIN_LOCALIZATION_TO_MICROTUBULE_ORGANIZING_CENTER     | 1.13 | 0.56 | 0 | 0 | 0 | not significant |
| 11784 | KEGG_ACUTE_MYELOID_LEUKEMIA                                  | 1.13 | 0.56 | 0 | 0 | 0 | not significant |
| 11785 | BIOCARTA_PDFG_PATHWAY                                        | 1.13 | 0.55 | 0 | 0 | 0 | not significant |
| 11786 | GO_MESONEPHROS_DEVELOPMENT                                   | 1.13 | 0.55 | 0 | 0 | 0 | not significant |
| 11787 | GO_NEURON_MATURATION                                         | 1.13 | 0.54 | 0 | 0 | 0 | not significant |
| 11788 | RAMASWAMY_METASTASIS_DN                                      | 1.13 | 0.54 | 0 | 0 | 0 | not significant |
| 11789 | REACTOME_SIGNALING_BY_NON_RECEPTOR_TYROSINE_KINASES          | 1.13 | 0.54 | 0 | 0 | 0 | not significant |
| 11790 | DARWICHE_PAPILLOMA_RISK_HIGH_VS_LOW_DN                       | 1.13 | 0.53 | 0 | 0 | 0 | not significant |
| 11791 | GO_COLLAGEN_BINDING                                          | 1.13 | 0.53 | 0 | 0 | 0 | not significant |
| 11792 | GO_RESPONSE_TO_ELECTRICAL_STIMULUS                           | 1.13 | 0.53 | 0 | 0 | 0 | not significant |
| 11793 | GO_RETROGRADE_TRANSPORT_ENDOSOME_TO_PLASMA_MEMBRANE          | 1.13 | 0.53 | 0 | 0 | 0 | not significant |
| 11794 | KYNG_NORMAL_AGING_DN                                         | 1.13 | 0.53 | 0 | 0 | 0 | not significant |
| 11795 | REACTOME_INSULIN_RECEPTOR_SIGNALING_CASCADE                  | 1.13 | 0.53 | 0 | 0 | 0 | not significant |
| 11796 | GO_COFACTOR_TRANSMEMBRANE_TRANSPORTER_ACTIVITY               | 1.13 | 0.52 | 0 | 0 | 0 | not significant |
| 11797 | GO_ERYTHROCYTE_MATURATION                                    | 1.13 | 0.52 | 0 | 0 | 0 | not significant |
| 11798 | GO_HISTONE_DEUBIQUITINATION                                  | 1.13 | 0.52 | 0 | 0 | 0 | not significant |
| 11799 | GO TRABECULA MORPHOGENESIS                                   | 1.13 | 0.52 | 0 | 0 | 0 | not significant |
| 11800 | UZONYI_RESPONSE_TO_LEUKOTRIENE_AND_THROMBIN                  | 1.13 | 0.52 | 0 | 0 | 0 | not significant |
| 11801 | BOYLAN_MULTIPLE_MYELOMA_D_CLUSTER_UP                         | 1.13 | 0.51 | 0 | 0 | 0 | not significant |
| 11802 | CHR6Q24                                                      | 1.13 | 0.51 | 0 | 0 | 0 | not significant |
| 11803 | GO_NEGATIVE_REGULATION_OF_NEUROTRANSMITTER_TRANSPORT         | 1.13 | 0.51 | 0 | 0 | 0 | not significant |
| 11804 | GO_PROTEIN_LIPID_COMPLEX                                     | 1.13 | 0.51 | 0 | 0 | 0 | not significant |
| 11805 | GO_ACROSOME_REACTION                                         | 1.13 | 0.50 | 0 | 0 | 0 | not significant |
| 11806 | GO_CD40_RECEPTOR_COMPLEX                                     | 1.13 | 0.50 | 0 | 0 | 0 | not significant |
| 11807 | GO_DYNEIN_LIGHT_INTERMEDIATE_CHAIN_BINDING                   | 1.13 | 0.50 | 0 | 0 | 0 | not significant |
| 11808 | GO_MONOVALENT_INORGANIC_ANION_HOMEOSTASIS                    | 1.13 | 0.50 | 0 | 0 | 0 | not significant |
| 11809 | PID_LYMPH_ANGIOGENESIS_PATHWAY                               | 1.13 | 0.50 | 0 | 0 | 0 | not significant |
| 11810 | REACTOME_NEGATIVE_REGULATION_OF_FGFR1_SIGNALING              | 1.13 | 0.50 | 0 | 0 | 0 | not significant |
| 11811 | BIOCARTA_STAT3_PATHWAY                                       | 1.13 | 0.49 | 0 | 0 | 0 | not significant |
| 11812 | COURTOIS_SENESCENCE_TRIGGERS                                 | 1.13 | 0.49 | 0 | 0 | 0 | not significant |
| 11813 | NIELSEN_GIST_AND_SYNOVIAL_SARCOMA_UP                         | 1.13 | 0.49 | 0 | 0 | 0 | not significant |
| 11814 | GO_NEGATIVE_REGULATION_OF_TELOMERE_CAPPING                   | 1.13 | 0.48 | 0 | 0 | 0 | not significant |
| 11815 | GO_SKELETAL_MUSCLE_CELL_PROLIFERATION                        | 1.13 | 0.48 | 0 | 0 | 0 | not significant |
| 11816 | GO_REGULATION_OF_PROTEIN_ADP_RIBOSYLATION                    | 1.13 | 0.47 | 0 | 0 | 0 | not significant |
| 11817 | BIOCARTA_ASBCCELL_PATHWAY                                    | 1.13 | 0.46 | 0 | 0 | 0 | not significant |
| 11818 | GO_DETECTION_OF_BIOTIC_STIMULUS                              | 1.13 | 0.46 | 0 | 0 | 0 | not significant |
| 11819 | GO_NEGATIVE_REGULATION_OF_BONE_REMODELING                    | 1.13 | 0.46 | 0 | 0 | 0 | not significant |
| 11820 | REACTOME_GRB2_EVENTS_IN_ERBB2_SIGNALING                      | 1.13 | 0.46 | 0 | 0 | 0 | not significant |
| 11821 | GO_MIRNA_EDITING_COMPLEX                                     | 1.13 | 0.45 | 0 | 0 | 0 | not significant |
| 11822 | PALOMERO_GSI_SENSITIVITY_UP                                  | 1.13 | 0.45 | 0 | 0 | 0 | not significant |
| 11823 | SUZUKI_RESPONSE_TO_TSA_AND_DECITABINE_1A                     | 1.13 | 0.45 | 0 | 0 | 0 | not significant |
| 11824 | BUYTAERT_PHOTODYNAMIC_THERAPY_STRESS_UP                      | 1.14 | 1.01 | 0 | 0 | 0 | not significant |
| 11825 | GINESTIER_BREAST_CANCER_20Q13_AMPLIFICATION_DN               | 1.14 | 0.72 | 0 | 0 | 0 | not significant |
| 11826 | MIYAGAWA_TARGETS_OF_EWSR1_ETS_FUSIONS_UP                     | 1.14 | 0.69 | 0 | 0 | 0 | not significant |
| 11827 | PICCALUGA_ANGIOIMMUNOBLASTIC_LYMPHOMA_DN                     | 1.14 | 0.67 | 0 | 0 | 0 | not significant |
| 11828 | CHR16P11                                                     | 1.14 | 0.66 | 0 | 0 | 0 | not significant |
| 11829 | LAHO_COLORECTAL_CANCER_SERRATED_DN                           | 1.14 | 0.65 | 0 | 0 | 0 | not significant |
| 11830 | GO_NEGATIVE_REGULATION_OF_IMMUNE_EFFECTOR_PROCESS            | 1.14 | 0.64 | 0 | 0 | 0 | not significant |
| 11831 | RAO_BOUND_BY_SALL4                                           | 1.14 | 0.64 | 0 | 0 | 0 | not significant |
| 11832 | HALLMARK_IL6_JAK_STAT3_SIGNALING                             | 1.14 | 0.63 | 0 | 0 | 0 | not significant |
| 11833 | FIGUEROA_AML_METHYLATION_CLUSTER_1_UP                        | 1.14 | 0.62 | 0 | 0 | 0 | not significant |
| 11834 | HOLLERN_EMT_BREAST_TUMOR_DN                                  | 1.14 | 0.61 | 0 | 0 | 0 | not significant |
| 11835 | GO_CHEMICAL_SYNAPTIC_TRANSMISSION_POSTSYNAPTIC               | 1.14 | 0.60 | 0 | 0 | 0 | not significant |
| 11836 | REACTOME_TNF_SIGNALING                                       | 1.14 | 0.60 | 0 | 0 | 0 | not significant |
| 11837 | BREDEMEYER_RAG_SIGNALING_VIA_ATM_NOT_VIA_NFKB_UP             | 1.14 | 0.59 | 0 | 0 | 0 | not significant |
| 11838 | GO_NEGATIVE_REGULATION_OF_SMOOTH_MUSCLE_CELL_PROLIFERATION   | 1.14 | 0.59 | 0 | 0 | 0 | not significant |
| 11839 | GO_REGULATION_OF_ACTIN_NUCLEATION                            | 1.14 | 0.58 | 0 | 0 | 0 | not significant |
| 11840 | REACTOME_CD28_CO_STIMULATION                                 | 1.14 | 0.58 | 0 | 0 | 0 | not significant |
| 11841 | GO_CLATHRIN_BINDING                                          | 1.14 | 0.57 | 0 | 0 | 0 | not significant |
| 11842 | GO_DEMETHYLASE_ACTIVITY                                      | 1.14 | 0.57 | 0 | 0 | 0 | not significant |
| 11843 | GO_REGULATION_OF_ERYTHROCYTE_DIFFERENTIATION                 | 1.14 | 0.57 | 0 | 0 | 0 | not significant |
| 11844 | SHETH_LIVER_CANCER_VS_TXNIP_LOSS_PAM6                        | 1.14 | 0.57 | 0 | 0 | 0 | not significant |
| 11845 | GO_G2_DNA_DAMAGE_CHECKPOINT                                  | 1.14 | 0.56 | 0 | 0 | 0 | not significant |
| 11846 | GO_GAMMA_TUBULIN_BINDING                                     | 1.14 | 0.56 | 0 | 0 | 0 | not significant |
| 11847 | GO_B_CELL_HOMEOSTASIS                                        | 1.14 | 0.55 | 0 | 0 | 0 | not significant |
| 11848 | GO_POSITIVE_REGULATION_OF_DENDRITE_MORPHOGENESIS             | 1.14 | 0.55 | 0 | 0 | 0 | not significant |
| 11849 | GO_REGULATION_OF_BIOMINERAL_TISSUE_DEVELOPMENT               | 1.14 | 0.55 | 0 | 0 | 0 | not significant |
| 11850 | GO_UBIQUITIN_LIKE_PROTEIN_CONJUGATING_ENZYME_BINDING         | 1.14 | 0.55 | 0 | 0 | 0 | not significant |
| 11851 | GO_FILAMENTOUS_ACTIN                                         | 1.14 | 0.53 | 0 | 0 | 0 | not significant |
| 11852 | GO_METANEPHRIC_NEPHRON_MORPHOGENESIS                         | 1.14 | 0.53 | 0 | 0 | 0 | not significant |
| 11853 | GO_POSITIVE_REGULATION_OF_SMOOTH_MUSCLE_CELL_DIFFERENTIATION | 1.14 | 0.53 | 0 | 0 | 0 | not significant |
| 11854 | GO_REGULATION_OF_TRANSPOSITION                               | 1.14 | 0.53 | 0 | 0 | 0 | not significant |
| 11855 | RIZ_ERYTHROID_DIFFERENTIATION_12HR                           | 1.14 | 0.53 | 0 | 0 | 0 | not significant |
| 11856 | GO_NEGATIVE_REGULATION_OF_RHO_PROTEIN_SIGNAL_TRANSDUCTION    | 1.14 | 0.52 | 0 | 0 | 0 | not significant |
| 11857 | GO_AUTOPHAGOSOME_MEMBRANE                                    | 1.14 | 0.51 | 0 | 0 | 0 | not significant |
| 11858 | GO_CATECHOLAMINE_BIOSYNTHETIC_PROCESS                        | 1.14 | 0.51 | 0 | 0 | 0 | not significant |
| 11859 | GO_INFLAMMASOME_COMPLEX                                      | 1.14 | 0.51 | 0 | 0 | 0 | not significant |
| 11860 | GO_MELANOCYTE_DIFFERENTIATION                                | 1.14 | 0.51 | 0 | 0 | 0 | not significant |
| 11861 | GO_POSITIVE_REGULATION_OF_LYMPHOCYTE_APOPTOTIC_PROCESS       | 1.14 | 0.51 | 0 | 0 | 0 | not significant |
| 11862 | MARIADASON_RESPONSE_TO_BUTYRATE_SULINDAC_4                   | 1.14 | 0.51 | 0 | 0 | 0 | not significant |
| 11863 | REACTOME_INTERLEUKIN_6_FAMILY_SIGNALING                      | 1.14 | 0.51 | 0 | 0 | 0 | not significant |
| 11864 | REACTOME_PURINE_RIBONUCLEOSIDE_MONOPHOSPHATE_BIOSYNTHESIS    | 1.14 | 0.51 | 0 | 0 | 0 | not significant |
| 11865 | BACOLOD_RESISTANCE_TO_ALKYLATING_AGENTS_UP                   | 1.14 | 0.50 | 0 | 0 | 0 | not significant |
| 11866 | GO_PARAXIAL_MESODERM_MORPHOGENESIS                           | 1.14 | 0.50 | 0 | 0 | 0 | not significant |
| 11867 | GO_POSITIVE_REGULATION_OF_INTERLEUKIN_1_SECRETION            | 1.14 | 0.50 | 0 | 0 | 0 | not significant |
| 11868 | GO_REGULATION_OF_AMYLOID_BETA_CLEARANCE                      | 1.14 | 0.50 | 0 | 0 | 0 | not significant |
| 11869 | GO_REGULATION_OF_TOLERANCE_INDUCTION                         | 1.14 | 0.50 | 0 | 0 | 0 | not significant |

|       |                                                           |      |      |   |   |   |                 |
|-------|-----------------------------------------------------------|------|------|---|---|---|-----------------|
| 11870 | REACTOME_NITRIC_OXIDE_STIMULATES_GUANYLATE_CYCLASE        | 1.14 | 0.50 | 0 | 0 | 0 | not significant |
| 11871 | UROSEVIC_RESPONSE_TO_IMQUIMOD                             | 1.14 | 0.50 | 0 | 0 | 0 | not significant |
| 11872 | GO_CELLULAR_RESPONSE_TO_SALT_STRESS                       | 1.14 | 0.49 | 0 | 0 | 0 | not significant |
| 11873 | GO_CORPUS_CALLOSUM_MORPHOGENESIS                          | 1.14 | 0.49 | 0 | 0 | 0 | not significant |
| 11874 | GO_DNA_CLAMP_LOADER_ACTIVITY                              | 1.14 | 0.49 | 0 | 0 | 0 | not significant |
| 11875 | REACTOME_IRAK2_MEDIATED_ACTIVATION_OF_TAK1_COMPLEX        | 1.14 | 0.49 | 0 | 0 | 0 | not significant |
| 11876 | GO_BETA_GALACTOSIDASE_ACTIVITY                            | 1.14 | 0.48 | 0 | 0 | 0 | not significant |
| 11877 | GO_MANNANOSE_METABOLIC_PROCESS                            | 1.14 | 0.48 | 0 | 0 | 0 | not significant |
| 11878 | GO_POLE_PLASM                                             | 1.14 | 0.48 | 0 | 0 | 0 | not significant |
| 11879 | GO_DNA_ENDOREPLICATION                                    | 1.14 | 0.47 | 0 | 0 | 0 | not significant |
| 11880 | REACTOME_PI_3K_CASCADE:FGFR2                              | 1.14 | 0.46 | 0 | 0 | 0 | not significant |
| 11881 | GO_SEQUENCE_SPECIFIC_DNA_BINDING                          | 1.15 | 0.99 | 0 | 0 | 0 | not significant |
| 11882 | GO_INTRINSIC_COMPONENT_OF_PLASMA_MEMBRANE                 | 1.15 | 0.97 | 0 | 0 | 0 | not significant |
| 11883 | RICKMAN_METASTASIS_UP                                     | 1.15 | 0.87 | 0 | 0 | 0 | not significant |
| 11884 | GO_T_CELL_ACTIVATION                                      | 1.15 | 0.80 | 0 | 0 | 0 | not significant |
| 11885 | GO_RECEPTOR_COMPLEX                                       | 1.15 | 0.77 | 0 | 0 | 0 | not significant |
| 11886 | ACEVEDO_LIVER_TUMOR_VS_NORMAL_ADJACENT_TISSUE_DN          | 1.15 | 0.76 | 0 | 0 | 0 | not significant |
| 11887 | STK33_SKM_UP                                              | 1.15 | 0.74 | 0 | 0 | 0 | not significant |
| 11888 | COLDREN_GEFITINIB_RESISTANCE_DN                           | 1.15 | 0.71 | 0 | 0 | 0 | not significant |
| 11889 | IVANOVA_HEMATOPOIESIS_STEM_CELL_LONG_TERM                 | 1.15 | 0.71 | 0 | 0 | 0 | not significant |
| 11890 | BROWNE_HCMV_INFECTION_18HR_DN                             | 1.15 | 0.69 | 0 | 0 | 0 | not significant |
| 11891 | GO_MEMBRANE_LIPID_BIOSYNTHETIC_PROCESS                    | 1.15 | 0.69 | 0 | 0 | 0 | not significant |
| 11892 | AKT_UP.V1_DN                                              | 1.15 | 0.66 | 0 | 0 | 0 | not significant |
| 11893 | GO_CELLULAR_TRANSITION_METAL_ION_HOMEOSTASIS              | 1.15 | 0.65 | 0 | 0 | 0 | not significant |
| 11894 | GO_REGULATION_OF_NIK_NF_KAPPAB_SIGNALING                  | 1.15 | 0.64 | 0 | 0 | 0 | not significant |
| 11895 | BRUINS_UVC_RESPONSE_MIDDLE                                | 1.15 | 0.63 | 0 | 0 | 0 | not significant |
| 11896 | GO_LYSOSOMAL_TRANSPORT                                    | 1.15 | 0.63 | 0 | 0 | 0 | not significant |
| 11897 | REACTOME_RAB_GERANYLGERANYLATION                          | 1.15 | 0.61 | 0 | 0 | 0 | not significant |
| 11898 | CHR13Q12                                                  | 1.15 | 0.60 | 0 | 0 | 0 | not significant |
| 11899 | GO_SOLUTE_CATION_SYMPORTER_ACTIVITY                       | 1.15 | 0.60 | 0 | 0 | 0 | not significant |
| 11900 | GO_SYNTAXIN_BINDING                                       | 1.15 | 0.60 | 0 | 0 | 0 | not significant |
| 11901 | GO_REGULATION_OF_GLUCOSE_METABOLIC_PROCESS                | 1.15 | 0.58 | 0 | 0 | 0 | not significant |
| 11902 | SENESE_HDAC2_TARGETS_DN                                   | 1.15 | 0.58 | 0 | 0 | 0 | not significant |
| 11903 | CHR2P21                                                   | 1.15 | 0.57 | 0 | 0 | 0 | not significant |
| 11904 | GO_MANNOSYLATION                                          | 1.15 | 0.57 | 0 | 0 | 0 | not significant |
| 11905 | GO_CYCLIN_DEPENDENT_PROTEIN_SERINE_THREONINE_KINASE_REGUL | 1.15 | 0.56 | 0 | 0 | 0 | not significant |
| 11906 | GO_PROTEIN_ADP_RIBOSYLASE_ACTIVITY                        | 1.15 | 0.56 | 0 | 0 | 0 | not significant |
| 11907 | LIAN_LIPA_TARGETS_3M                                      | 1.15 | 0.56 | 0 | 0 | 0 | not significant |
| 11908 | BIOCARTA_EPO_PATHWAY                                      | 1.15 | 0.55 | 0 | 0 | 0 | not significant |
| 11909 | GO_REGULATION_OF_MORPHOGENESIS_OF_A_BRANCHING_STRUCTURE   | 1.15 | 0.55 | 0 | 0 | 0 | not significant |
| 11910 | GO_SOLUTE_SODIUM_SYMPORTER_ACTIVITY                       | 1.15 | 0.55 | 0 | 0 | 0 | not significant |
| 11911 | LOPES_METHYLATED_IN_COLON_CANCER_DN                       | 1.15 | 0.55 | 0 | 0 | 0 | not significant |
| 11912 | REACTOME_DOWNREGULATION_OF_SMAD2_3:SMAD4_TRANSCRIPTION    | 1.15 | 0.55 | 0 | 0 | 0 | not significant |
| 11913 | GO_INTERLEUKIN_6_MEDIATED_SIGNALING_PATHWAY               | 1.15 | 0.54 | 0 | 0 | 0 | not significant |
| 11914 | GO_NEGATIVE_REGULATION_OF_ERAD_PATHWAY                    | 1.15 | 0.54 | 0 | 0 | 0 | not significant |
| 11915 | GO_REGULATION_OF_MACROPHAGE_CHEMOTAXIS                    | 1.15 | 0.54 | 0 | 0 | 0 | not significant |
| 11916 | GARGALOVIC_RESPONSE_TO_OXIDIZED_PHOSPHOLIPIDS_PINK_DN     | 1.15 | 0.53 | 0 | 0 | 0 | not significant |
| 11917 | GO_GAMMA_TUBULIN_LARGE_COMPLEX                            | 1.15 | 0.53 | 0 | 0 | 0 | not significant |
| 11918 | GO_INOSITOL_1_4_5_TRISPHOSPHATE_BINDING                   | 1.15 | 0.53 | 0 | 0 | 0 | not significant |
| 11919 | GO_NEGATIVE_REGULATION_OF_BLOOD_VESSEL_ENDOTHELIAL_CELL   | 1.15 | 0.53 | 0 | 0 | 0 | not significant |
| 11920 | GO_OPSONIN_BINDING                                        | 1.15 | 0.53 | 0 | 0 | 0 | not significant |
| 11921 | GO_NEGATIVE_REGULATION_OF_CYTOKINE_PRODUCTION_INVOLVED_IN | 1.15 | 0.51 | 0 | 0 | 0 | not significant |
| 11922 | GO_REGULATION_OF_ISOTYPE_SWITCHING_TO_IGE_ISOTYPES        | 1.15 | 0.51 | 0 | 0 | 0 | not significant |
| 11923 | GO_RETINA_VASCULATURE_DEVELOPMENT_IN_CAMERA_TYPE_EYE      | 1.15 | 0.51 | 0 | 0 | 0 | not significant |
| 11924 | GO_GLYCOSIDE_CATABOLIC_PROCESS                            | 1.15 | 0.50 | 0 | 0 | 0 | not significant |
| 11925 | REACTOME_LIPOPHAGY                                        | 1.15 | 0.50 | 0 | 0 | 0 | not significant |
| 11926 | REACTOME_PI_3K_CASCADE:FGFR4                              | 1.15 | 0.50 | 0 | 0 | 0 | not significant |
| 11927 | GO_DEAD_H_BOX_RNA_HELICASE_BINDING                        | 1.15 | 0.49 | 0 | 0 | 0 | not significant |
| 11928 | GO_REGULATION_OF_GASTRIC_ACID_SECRETION                   | 1.15 | 0.49 | 0 | 0 | 0 | not significant |
| 11929 | GO_UBIQUITIN_LIGASE_INHIBITOR_ACTIVITY                    | 1.15 | 0.49 | 0 | 0 | 0 | not significant |
| 11930 | TCGA_GLOBLASTOMA_MUTATED                                  | 1.15 | 0.49 | 0 | 0 | 0 | not significant |
| 11931 | GO_DOUBLE_STRANDED_DNA_BINDING                            | 1.16 | 1.05 | 0 | 0 | 0 | not significant |
| 11932 | BASAKI_YBX1_TARGETS_DN                                    | 1.16 | 0.84 | 0 | 0 | 0 | not significant |
| 11933 | GO_SECRETORY_GRANULE_MEMBRANE                             | 1.16 | 0.77 | 0 | 0 | 0 | not significant |
| 11934 | GO_STRUCTURAL_CONSTITUENT_OF_RIBOSOME                     | 1.16 | 0.75 | 0 | 0 | 0 | not significant |
| 11935 | GO_POSITIVE_REGULATION_OF_PEPTIDE_SECRETION               | 1.16 | 0.74 | 0 | 0 | 0 | not significant |
| 11936 | GO_REGIONALIZATION                                        | 1.16 | 0.74 | 0 | 0 | 0 | not significant |
| 11937 | HALLMARK_TNFA_SIGNALING_VIA_NFKB                          | 1.16 | 0.71 | 0 | 0 | 0 | not significant |
| 11938 | MATZUK_SPERMATOZOA                                        | 1.16 | 0.70 | 0 | 0 | 0 | not significant |
| 11939 | GO_INTERMEDIATE_FILAMENT_CYTOSKELETON                     | 1.16 | 0.67 | 0 | 0 | 0 | not significant |
| 11940 | MCBRYAN_PUBERTAL_BREAST_3_4WK_UP                          | 1.16 | 0.67 | 0 | 0 | 0 | not significant |
| 11941 | REACTOME_NUCLEOTIDE_BINDING_DOMAIN_LEUCINE_RICH_REPEAT_CC | 1.16 | 0.66 | 0 | 0 | 0 | not significant |
| 11942 | CHR17P11                                                  | 1.16 | 0.65 | 0 | 0 | 0 | not significant |
| 11943 | WNT_UP.V1_UP                                              | 1.16 | 0.65 | 0 | 0 | 0 | not significant |
| 11944 | GARGALOVIC_RESPONSE_TO_OXIDIZED_PHOSPHOLIPIDS_TURQUOISE_L | 1.16 | 0.64 | 0 | 0 | 0 | not significant |
| 11945 | GO_ADHERENS_JUNCTION_ORGANIZATION                         | 1.16 | 0.64 | 0 | 0 | 0 | not significant |
| 11946 | CHR3P22                                                   | 1.16 | 0.63 | 0 | 0 | 0 | not significant |
| 11947 | GO_EMBRYONIC_PATTERN_SPECIFICATION                        | 1.16 | 0.61 | 0 | 0 | 0 | not significant |
| 11948 | GO_MESODERM_DEVELOPMENT                                   | 1.16 | 0.61 | 0 | 0 | 0 | not significant |
| 11949 | GO_NEGATIVE_REGULATION_OF_RESPONSE_TO_BIOTIC_STIMULUS     | 1.16 | 0.61 | 0 | 0 | 0 | not significant |
| 11950 | GO_PHOSPHATIDYLINOSITOL_3_4_BISPHOSPHATE_BINDING          | 1.16 | 0.61 | 0 | 0 | 0 | not significant |
| 11951 | SAMOLS_TARGETS_OF_KHSV_MIRNAS_DN                          | 1.16 | 0.61 | 0 | 0 | 0 | not significant |
| 11952 | GO_ACROSOMAL_VESICLE                                      | 1.16 | 0.60 | 0 | 0 | 0 | not significant |
| 11953 | GO_INTRINSIC_COMPONENT_OF_SYNAPTIC_MEMBRANE               | 1.16 | 0.60 | 0 | 0 | 0 | not significant |
| 11954 | CHR1P21                                                   | 1.16 | 0.59 | 0 | 0 | 0 | not significant |
| 11955 | GO_FICOLIN_1_RICH_GRANULE_MEMBRANE                        | 1.16 | 0.59 | 0 | 0 | 0 | not significant |
| 11956 | GO_REGULATION_OF_DOUBLE_STRAND_BREAK_REPAIR_VIA_NONHOMC   | 1.16 | 0.59 | 0 | 0 | 0 | not significant |
| 11957 | GO_NEGATIVE_REGULATION_OF_AXON_EXTENSION                  | 1.16 | 0.58 | 0 | 0 | 0 | not significant |
| 11958 | GO_POSITIVE_REGULATION_OF_BIOMINERAL_TISSUE_DEVELOPMENT   | 1.16 | 0.58 | 0 | 0 | 0 | not significant |
| 11959 | GO_REGULATION_OF_NATURAL_KILLER_CELL_MEDIATED_IMMUNITY    | 1.16 | 0.58 | 0 | 0 | 0 | not significant |
| 11960 | GO_RESPONSE_TO_INTERLEUKIN_7                              | 1.16 | 0.58 | 0 | 0 | 0 | not significant |
| 11961 | NIKOLSKY_BREAST_CANCER_7P22_AMPLICON                      | 1.16 | 0.57 | 0 | 0 | 0 | not significant |
| 11962 | GO_POSITIVE_REGULATION_OF_GLUCOSE_METABOLIC_PROCESS       | 1.16 | 0.56 | 0 | 0 | 0 | not significant |
| 11963 | GO_RESPONSE_TO_MITOCHONDRIAL_DEPOLARISATION               | 1.16 | 0.56 | 0 | 0 | 0 | not significant |
| 11964 | REACTOME_CYTOSOLIC_IRON_SULFUR_CLUSTER_ASSEMBLY           | 1.16 | 0.56 | 0 | 0 | 0 | not significant |
| 11965 | GO_ENTRY_OF_BACTERIUM_INTO_HOST_CELL                      | 1.16 | 0.53 | 0 | 0 | 0 | not significant |
| 11966 | GO_PEPTIDYL_SERINE_AUTOPHOSPHORYLATION                    | 1.16 | 0.53 | 0 | 0 | 0 | not significant |
| 11967 | GO_REGULATION_OF_EXCITATORY_SYNAPSE_ASSEMBLY              | 1.16 | 0.53 | 0 | 0 | 0 | not significant |
| 11968 | KEGG_GLYCOSPHINGOLIPID_BIOSYNTHESIS_LACTO_AND_NEOLACTO_SI | 1.16 | 0.53 | 0 | 0 | 0 | not significant |
| 11969 | GARGALOVIC_RESPONSE_TO_OXIDIZED_PHOSPHOLIPIDS_LIGHTGREEN  | 1.16 | 0.52 | 0 | 0 | 0 | not significant |
| 11970 | GO_SENSORY_PERCEPTION_OF_BITTER_TASTE                     | 1.16 | 0.52 | 0 | 0 | 0 | not significant |
| 11971 | GO_VOLTAGE_GATED_SODIUM_CHANNEL_ACTIVITY                  | 1.16 | 0.52 | 0 | 0 | 0 | not significant |
| 11972 | IRITANI_MAD1_TARGETS_UP                                   | 1.16 | 0.52 | 0 | 0 | 0 | not significant |
| 11973 | KEGG_NON_HOMOLOGOUS_END_JOINING                           | 1.16 | 0.52 | 0 | 0 | 0 | not significant |
| 11974 | REACTOME_PYRIMIDINE_CATABOLISM                            | 1.16 | 0.52 | 0 | 0 | 0 | not significant |
| 11975 | GO_MRNA_3_END_PROCESSING_BY_STEM_LOOP_BINDING_AND_CLEAV   | 1.16 | 0.51 | 0 | 0 | 0 | not significant |
| 11976 | GO_REGULATION_OF_PROTEIN_KINASE_A_SIGNALING               | 1.16 | 0.51 | 0 | 0 | 0 | not significant |
| 11977 | GO_REGULATION_OF_TYPE_B_PANCREATIC_CELL_DEVELOPMENT       | 1.16 | 0.51 | 0 | 0 | 0 | not significant |
| 11978 | HOLLEMAN_DAUNORUBICIN_ALL_DN                              | 1.16 | 0.51 | 0 | 0 | 0 | not significant |

|       |                                                             |      |      |   |   |   |                 |
|-------|-------------------------------------------------------------|------|------|---|---|---|-----------------|
| 11979 | GO_LIGASE_ACTIVITY_FORMING_PHOSPHORIC_ESTER_BONDS           | 1.16 | 0.50 | 0 | 0 | 0 | not significant |
| 11980 | COULOUARN_TEMPORAL_TGFB1_SIGNATURE_UP                       | 1.17 | 0.73 | 0 | 0 | 0 | not significant |
| 11981 | KEGG_JAK_STAT_SIGNALING_PATHWAY                             | 1.17 | 0.73 | 0 | 0 | 0 | not significant |
| 11982 | GO_CELLULAR_RESPONSE_TO_INORGANIC_SUBSTANCE                 | 1.17 | 0.71 | 0 | 0 | 0 | not significant |
| 11983 | GO_GASTRULATION                                             | 1.17 | 0.71 | 0 | 0 | 0 | not significant |
| 11984 | LI_INDUCED_T_TO_NATURAL_KILLER_DN                           | 1.17 | 0.71 | 0 | 0 | 0 | not significant |
| 11985 | GO_ADULT_BEHAVIOR                                           | 1.17 | 0.69 | 0 | 0 | 0 | not significant |
| 11986 | GO_REGULATION_OF_DOUBLE_STRAND_BREAK_REPAIR                 | 1.17 | 0.67 | 0 | 0 | 0 | not significant |
| 11987 | GO_AMINOGLYCAN_CATABOLIC_PROCESS                            | 1.17 | 0.64 | 0 | 0 | 0 | not significant |
| 11988 | GO_NON_MEMBRANE_SPANNING_PROTEIN_TYROSINE_KINASE_ACTIVITY   | 1.17 | 0.64 | 0 | 0 | 0 | not significant |
| 11989 | GO_POST_EMBRYONIC_DEVELOPMENT                               | 1.17 | 0.63 | 0 | 0 | 0 | not significant |
| 11990 | YAO_TEMPORAL_RESPONSE_TO_PROGESTERONE_CLUSTER_6             | 1.17 | 0.63 | 0 | 0 | 0 | not significant |
| 11991 | GO_POSITIVE_REGULATION_OF_RECEPTOR_SIGNALING_PATHWAY_VIA    | 1.17 | 0.62 | 0 | 0 | 0 | not significant |
| 11992 | MATZUK_SPERMATID_DIFFERENTIATION                            | 1.17 | 0.61 | 0 | 0 | 0 | not significant |
| 11993 | ABDUD_LIF_SIGNALING_1_UP                                    | 1.17 | 0.59 | 0 | 0 | 0 | not significant |
| 11994 | CHR6P12                                                     | 1.17 | 0.59 | 0 | 0 | 0 | not significant |
| 11995 | GO_ADIPOSE_TISSUE_DEVELOPMENT                               | 1.17 | 0.59 | 0 | 0 | 0 | not significant |
| 11996 | GYORFFY_MITOXANTHONE_RESISTANCE                             | 1.17 | 0.59 | 0 | 0 | 0 | not significant |
| 11997 | VANHARANTA_UTERINE_FIBROID_UP                               | 1.17 | 0.59 | 0 | 0 | 0 | not significant |
| 11998 | CHR4Q22                                                     | 1.17 | 0.58 | 0 | 0 | 0 | not significant |
| 11999 | GO_REGULATION_OF_FATTY_ACID_TRANSPORT                       | 1.17 | 0.58 | 0 | 0 | 0 | not significant |
| 12000 | RICKMAN_HEAD_AND_NECK_CANCER_F                              | 1.17 | 0.58 | 0 | 0 | 0 | not significant |
| 12001 | GO_CELLULAR_RESPONSE_TO_STEROL                              | 1.17 | 0.56 | 0 | 0 | 0 | not significant |
| 12002 | GO_NEGATIVE_REGULATION_OF_CYCLIN_DEPENDENT_PROTEIN_KINASE   | 1.17 | 0.56 | 0 | 0 | 0 | not significant |
| 12003 | GO_PROTEIN_AUTO_ADP_RIBOSYLATION                            | 1.17 | 0.56 | 0 | 0 | 0 | not significant |
| 12004 | STEARMAN_TUMOR_FIELD_EFFECT_UP                              | 1.17 | 0.56 | 0 | 0 | 0 | not significant |
| 12005 | GO_INOSITOL_TRISPHOSPHATE_KINASE_ACTIVITY                   | 1.17 | 0.55 | 0 | 0 | 0 | not significant |
| 12006 | GO_NEGATIVE_REGULATION_OF_AMYLOID_PRECURSOR_PROTEIN_CAT.    | 1.17 | 0.55 | 0 | 0 | 0 | not significant |
| 12007 | SCHURINGA_STAT5A_TARGETS_DN                                 | 1.17 | 0.55 | 0 | 0 | 0 | not significant |
| 12008 | BANDRES_RESPONSE_TO_CARMUSTIN_MGMT_24HR_UP                  | 1.17 | 0.54 | 0 | 0 | 0 | not significant |
| 12009 | GO_POSITIVE_REGULATION_OF_HISTONE_H3_K27_METHYLATION        | 1.17 | 0.54 | 0 | 0 | 0 | not significant |
| 12010 | KYNG_WERNER_SYNDROM_DN                                      | 1.17 | 0.54 | 0 | 0 | 0 | not significant |
| 12011 | MAHADEVAN_IMATINIB_RESISTANCE_DN                            | 1.17 | 0.54 | 0 | 0 | 0 | not significant |
| 12012 | NIKOLSKY_BREAST_CANCER_22Q13_AMPLICON                       | 1.17 | 0.54 | 0 | 0 | 0 | not significant |
| 12013 | GO_NK_T_CELL_ACTIVATION                                     | 1.17 | 0.53 | 0 | 0 | 0 | not significant |
| 12014 | GO_PROTEIN_TYROSINE_KINASE_ACTIVATOR_ACTIVITY               | 1.17 | 0.53 | 0 | 0 | 0 | not significant |
| 12015 | BIOCARTA_NEUTROPHIL_PATHWAY                                 | 1.17 | 0.52 | 0 | 0 | 0 | not significant |
| 12016 | GO_MAINTENANCE_OF_POSTSYNAPTIC_SPECIALIZATION_STRUCTURE     | 1.17 | 0.52 | 0 | 0 | 0 | not significant |
| 12017 | GO_REGULATION_OF_ANION_CHANNEL_ACTIVITY                     | 1.17 | 0.51 | 0 | 0 | 0 | not significant |
| 12018 | GO_HMG_BOX_DOMAIN_BINDING                                   | 1.17 | 0.50 | 0 | 0 | 0 | not significant |
| 12019 | GO_REGULATION_OF_EPITHELIAL_CELL_DIFFERENTIATION_INVOLVED_I | 1.17 | 0.50 | 0 | 0 | 0 | not significant |
| 12020 | REACTOME_ACYL_CHAIN_REMODELING_OF_CL                        | 1.17 | 0.50 | 0 | 0 | 0 | not significant |
| 12021 | HEDVAT_ELF4_TARGETS_UP                                      | 1.17 | 0.48 | 0 | 0 | 0 | not significant |
| 12022 | GO_NEGATIVE_REGULATION_OF_RNA_BIOSYNTHETIC_PROCESS          | 1.18 | 1.40 | 0 | 0 | 0 | not significant |
| 12023 | RODRIGUES_THYROID_CARCINOMA_POORLY_DIFFERENTIATED_DN        | 1.18 | 1.19 | 0 | 0 | 0 | not significant |
| 12024 | GO_MOLECULAR_TRANSDUCER_ACTIVITY                            | 1.18 | 1.03 | 0 | 0 | 0 | not significant |
| 12025 | GO_GLYCOPROTEIN_BIOSYNTHETIC_PROCESS                        | 1.18 | 0.94 | 0 | 0 | 0 | not significant |
| 12026 | LINDGREN_BLADDER_CANCER_CLUSTER_3_DN                        | 1.18 | 0.83 | 0 | 0 | 0 | not significant |
| 12027 | ZHANG_RESPONSE_TO_IKK_INHIBITOR_AND_TNF_UP                  | 1.18 | 0.82 | 0 | 0 | 0 | not significant |
| 12028 | WANG_SMARCE1_TARGETS_UP                                     | 1.18 | 0.76 | 0 | 0 | 0 | not significant |
| 12029 | PRC2_EED_UP.V1_UP                                           | 1.18 | 0.74 | 0 | 0 | 0 | not significant |
| 12030 | GO_REGULATION_OF_LYMPHOCYTE_MEDIATED_IMMUNITY               | 1.18 | 0.72 | 0 | 0 | 0 | not significant |
| 12031 | GO_NEURON_SPINE                                             | 1.18 | 0.71 | 0 | 0 | 0 | not significant |
| 12032 | NABA_CORE_MATRISOME                                         | 1.18 | 0.70 | 0 | 0 | 0 | not significant |
| 12033 | GO_SODIUM_ION_TRANSMEMBRANE_TRANSPORTER_ACTIVITY            | 1.18 | 0.69 | 0 | 0 | 0 | not significant |
| 12034 | KEGG_T_CELL_RECEPTOR_SIGNALING_PATHWAY                      | 1.18 | 0.69 | 0 | 0 | 0 | not significant |
| 12035 | BORCZUK_MALIGNANT_MESOTHELIOMA_DN                           | 1.18 | 0.68 | 0 | 0 | 0 | not significant |
| 12036 | GO_NEURON_PROJECTION_TERMINUS                               | 1.18 | 0.68 | 0 | 0 | 0 | not significant |
| 12037 | CHR2Q33                                                     | 1.18 | 0.64 | 0 | 0 | 0 | not significant |
| 12038 | GO_PRESYNAPTIC_ACTIVE_ZONE_MEMBRANE                         | 1.18 | 0.63 | 0 | 0 | 0 | not significant |
| 12039 | GO_ADENYLATE_CYCLASE_INHIBITING_G_PROTEIN_COUPLED_RECEPTC   | 1.18 | 0.62 | 0 | 0 | 0 | not significant |
| 12040 | REACTOME_CD209_DC_SIGN_SIGNALING                            | 1.18 | 0.61 | 0 | 0 | 0 | not significant |
| 12041 | TAKEDA_TARGETS_OF_NUP98_HOXA9_FUSION_6HR_UP                 | 1.18 | 0.61 | 0 | 0 | 0 | not significant |
| 12042 | GO_REGULATION_OF_ENDOCRINE_PROCESS                          | 1.18 | 0.60 | 0 | 0 | 0 | not significant |
| 12043 | GO_REGULATION_OF_NON_CANONICAL_WNT_SIGNALING_PATHWAY        | 1.18 | 0.59 | 0 | 0 | 0 | not significant |
| 12044 | LEIN_LOCALIZED_TO_DISTAL_AND_PROXIMAL_DENDRITES             | 1.18 | 0.59 | 0 | 0 | 0 | not significant |
| 12045 | GO_BICARBONATE_TRANSMEMBRANE_TRANSPORTER_ACTIVITY           | 1.18 | 0.58 | 0 | 0 | 0 | not significant |
| 12046 | GO_INTERLEUKIN_27_MEDIATED_SIGNALING_PATHWAY                | 1.18 | 0.58 | 0 | 0 | 0 | not significant |
| 12047 | GO_NEGATIVE_REGULATION_OF_RECEPTOR_SIGNALING_PATHWAY_VIA    | 1.18 | 0.58 | 0 | 0 | 0 | not significant |
| 12048 | REACTOME_P75NTR_RECRUITS_SIGNALLING_COMPLEXES               | 1.18 | 0.58 | 0 | 0 | 0 | not significant |
| 12049 | GO_AMP_BIOSYNTHETIC_PROCESS                                 | 1.18 | 0.57 | 0 | 0 | 0 | not significant |
| 12050 | GO_MAP_KINASE_ACTIVITY                                      | 1.18 | 0.57 | 0 | 0 | 0 | not significant |
| 12051 | MALIK_REPRESSED_BY_ESTROGEN                                 | 1.18 | 0.57 | 0 | 0 | 0 | not significant |
| 12052 | CAIRO_PML_TARGETS_BOUND_BY_MYC_DN                           | 1.18 | 0.56 | 0 | 0 | 0 | not significant |
| 12053 | GO_EPITHELIAL_CELL_CELL_ADHESION                            | 1.18 | 0.56 | 0 | 0 | 0 | not significant |
| 12054 | GO_REGULATION_OF_MESODERM_DEVELOPMENT                       | 1.18 | 0.56 | 0 | 0 | 0 | not significant |
| 12055 | GO_REGULATION_OF_STEM_CELL_POPULATION_MAINTENANCE           | 1.18 | 0.56 | 0 | 0 | 0 | not significant |
| 12056 | GO_STRUCTURAL_CONSTITUENT_OF_SYNAPSE                        | 1.18 | 0.56 | 0 | 0 | 0 | not significant |
| 12057 | REACTOME_TNFR1_INDUCED_PROAPOPTOTIC_SIGNALING               | 1.18 | 0.56 | 0 | 0 | 0 | not significant |
| 12058 | GO_RESPONSE_TO_CAMPTOTHECIN                                 | 1.18 | 0.54 | 0 | 0 | 0 | not significant |
| 12059 | REACTOME_REACTIONS_SPECIFIC_TO_THE_COMPLEX_N_GLYCAN_SYN     | 1.18 | 0.54 | 0 | 0 | 0 | not significant |
| 12060 | GO_MIRNA_LOADING_ONTO_RISC_INVOLVED_IN_GENE_SILENCING_BY_I  | 1.18 | 0.53 | 0 | 0 | 0 | not significant |
| 12061 | SHIN_B_CELL_LYMPHOMA_CLUSTER_1                              | 1.18 | 0.53 | 0 | 0 | 0 | not significant |
| 12062 | GO_SEQUENCE_SPECIFIC_DOUBLE_STRANDED_DNA_BINDING            | 1.19 | 1.20 | 0 | 0 | 0 | not significant |
| 12063 | BENPORATH_PRC2_TARGETS                                      | 1.19 | 0.91 | 0 | 0 | 0 | not significant |
| 12064 | GO_SYNAPTIC_MEMBRANE                                        | 1.19 | 0.91 | 0 | 0 | 0 | not significant |
| 12065 | KOYAMA_SEMA3B_TARGETS_UP                                    | 1.19 | 0.87 | 0 | 0 | 0 | not significant |
| 12066 | LEE_RECENT_THYMIC_EMIGRANT                                  | 1.19 | 0.85 | 0 | 0 | 0 | not significant |
| 12067 | ROME_INSULIN_TARGETS_IN_MUSCLE_DN                           | 1.19 | 0.83 | 0 | 0 | 0 | not significant |
| 12068 | GO_REGULATION_OF_LYMPHOCYTE_DIFFERENTIATION                 | 1.19 | 0.82 | 0 | 0 | 0 | not significant |
| 12069 | GO_REGULATION_OF_RAS_PROTEIN_SIGNAL_TRANSDUCTION            | 1.19 | 0.82 | 0 | 0 | 0 | not significant |
| 12070 | PEDRIOLI_MIR31_TARGETS_UP                                   | 1.19 | 0.78 | 0 | 0 | 0 | not significant |
| 12071 | GO_CYCLIC_NUCLEOTIDE_MEDIATED_SIGNALING                     | 1.19 | 0.76 | 0 | 0 | 0 | not significant |
| 12072 | KIM_MYCN_AMPLIFICATION_TARGETS_DN                           | 1.19 | 0.76 | 0 | 0 | 0 | not significant |
| 12073 | GO_MAINTENANCE_OF_PROTEIN_LOCATION                          | 1.19 | 0.75 | 0 | 0 | 0 | not significant |
| 12074 | BRCA1_DN.V1_DN                                              | 1.19 | 0.73 | 0 | 0 | 0 | not significant |
| 12075 | GO_EPITHELIAL_CELL_APOPTOTIC_PROCESS                        | 1.19 | 0.71 | 0 | 0 | 0 | not significant |
| 12076 | GO_HOMOLOGOUS_RECOMBINATION                                 | 1.19 | 0.70 | 0 | 0 | 0 | not significant |
| 12077 | KEGG_ERBB_SIGNALING_PATHWAY                                 | 1.19 | 0.70 | 0 | 0 | 0 | not significant |
| 12078 | REACTOME_SIGNALING_BY_INSULIN_RECEPTOR                      | 1.19 | 0.70 | 0 | 0 | 0 | not significant |
| 12079 | BIOCARTA_ARAP_PATHWAY                                       | 1.19 | 0.67 | 0 | 0 | 0 | not significant |
| 12080 | CHR10P11                                                    | 1.19 | 0.67 | 0 | 0 | 0 | not significant |
| 12081 | GO_MESODERM_MORPHOGENESIS                                   | 1.19 | 0.67 | 0 | 0 | 0 | not significant |
| 12082 | GO_ROUGH_ENDOPLASMIC_RETICULUM_MEMBRANE                     | 1.19 | 0.66 | 0 | 0 | 0 | not significant |
| 12083 | REACTOME_REGULATION_OF_TNFR1_SIGNALING                      | 1.19 | 0.66 | 0 | 0 | 0 | not significant |
| 12084 | MORI_PLASMA_CELL_DN                                         | 1.19 | 0.64 | 0 | 0 | 0 | not significant |
| 12085 | BIOCARTA_TOB1_PATHWAY                                       | 1.19 | 0.62 | 0 | 0 | 0 | not significant |
| 12086 | GO_POSITIVE_REGULATION_OF_ACTIN_NUCLEATION                  | 1.19 | 0.61 | 0 | 0 | 0 | not significant |
| 12087 | GO_REGULATION_OF_MEMBRANE_INVAGINATION                      | 1.19 | 0.60 | 0 | 0 | 0 | not significant |



|       |                                                            |      |      |   |   |   |                 |
|-------|------------------------------------------------------------|------|------|---|---|---|-----------------|
| 12088 | GO_REGULATION_OF_RECEPTOR_LOCALIZATION_TO_SYNAPSE          | 1.19 | 0.60 | 0 | 0 | 0 | not significant |
| 12089 | HANN_RESISTANCE_TO_BCL2_INHIBITOR_UP                       | 1.19 | 0.60 | 0 | 0 | 0 | not significant |
| 12090 | GO_DENTATE_GYRUS_DEVELOPMENT                               | 1.19 | 0.59 | 0 | 0 | 0 | not significant |
| 12091 | GO_REGULATION_OF_MODIFICATION_OF_SYNAPTIC_STRUCTURE        | 1.19 | 0.59 | 0 | 0 | 0 | not significant |
| 12092 | KEGG_ALLOGRAFT_REJECTION                                   | 1.19 | 0.59 | 0 | 0 | 0 | not significant |
| 12093 | REACTOME_SIGNALING_BY_ACTVIN                               | 1.19 | 0.59 | 0 | 0 | 0 | not significant |
| 12094 | GO_NEGATIVE_REGULATION_OF_INTERFERON_BETA_PRODUCTION       | 1.19 | 0.58 | 0 | 0 | 0 | not significant |
| 12095 | GO_POSITIVE_REGULATION_OF_CYTOPLASMIC_MRNA_PROCESSING_BC   | 1.19 | 0.57 | 0 | 0 | 0 | not significant |
| 12096 | GO_POSITIVE_REGULATION_OF_TUMOR_NECROSIS_FACTOR_MEDIATED   | 1.19 | 0.57 | 0 | 0 | 0 | not significant |
| 12097 | GO_WATER_TRANSPORT                                         | 1.19 | 0.57 | 0 | 0 | 0 | not significant |
| 12098 | ABBDU_LIF_SIGNALING_2_UP                                   | 1.19 | 0.56 | 0 | 0 | 0 | not significant |
| 12099 | GO_NEGATIVE_REGULATION_OF_LEUKOCYTE_CHEMOTAXIS             | 1.19 | 0.56 | 0 | 0 | 0 | not significant |
| 12100 | ZHENG_FOXP3_TARGETS_DN                                     | 1.19 | 0.56 | 0 | 0 | 0 | not significant |
| 12101 | GO_DETECTION_OF_VIRUS                                      | 1.19 | 0.55 | 0 | 0 | 0 | not significant |
| 12102 | GO_POSITIVE_REGULATION_OF_ACTVIN_RECEPTOR_SIGNALING_PATHW  | 1.19 | 0.55 | 0 | 0 | 0 | not significant |
| 12103 | GO_POSITIVE_REGULATION_OF_NUCLEAR_CELL_CYCLE_DNA_REPLICA   | 1.19 | 0.55 | 0 | 0 | 0 | not significant |
| 12104 | GO_REGULATION_OF_CYTOPLASMIC_MRNA_PROCESSING_BODY_ASSEI    | 1.19 | 0.55 | 0 | 0 | 0 | not significant |
| 12105 | BIOCARTA_DICER_PATHWAY                                     | 1.19 | 0.54 | 0 | 0 | 0 | not significant |
| 12106 | GO_NEGATIVE_REGULATION_OF_CYTOKINESIS                      | 1.19 | 0.54 | 0 | 0 | 0 | not significant |
| 12107 | REACTOME_ERYTHROPOIETIN_ACTIVATES_PHOSPHOLIPASE_C_GAMMA    | 1.19 | 0.54 | 0 | 0 | 0 | not significant |
| 12108 | GO_POSITIVE_REGULATION_OF_PROTEIN_HOMOOLIGOMERIZATION      | 1.19 | 0.53 | 0 | 0 | 0 | not significant |
| 12109 | GO_THYROID_HORMONE_METABOLIC_PROCESS                       | 1.19 | 0.53 | 0 | 0 | 0 | not significant |
| 12110 | GO_CYTOKINE_PRODUCTION                                     | 1.20 | 1.20 | 0 | 0 | 0 | not significant |
| 12111 | GO_PROTEIN_TARGETING                                       | 1.20 | 1.16 | 0 | 0 | 0 | not significant |
| 12112 | GO_POSTSYNAPSE                                             | 1.20 | 1.04 | 0 | 0 | 0 | not significant |
| 12113 | CHANDRAN_METASTASIS_DN                                     | 1.20 | 0.92 | 0 | 0 | 0 | not significant |
| 12114 | GO_GLYCEROLIPID_METABOLIC_PROCESS                          | 1.20 | 0.91 | 0 | 0 | 0 | not significant |
| 12115 | PASQUALUCCI_LYMPHOMA_BY_GC_STAGE_DN                        | 1.20 | 0.87 | 0 | 0 | 0 | not significant |
| 12116 | GO_RHO_GTPASE_BINDING                                      | 1.20 | 0.86 | 0 | 0 | 0 | not significant |
| 12117 | GO_GATED_CHANNEL_ACTIVITY                                  | 1.20 | 0.85 | 0 | 0 | 0 | not significant |
| 12118 | PEREZ_TP53_AND_TP63_TARGETS                                | 1.20 | 0.82 | 0 | 0 | 0 | not significant |
| 12119 | GO_REGULATION_OF_ADAPTIVE_IMMUNE_RESPONSE                  | 1.20 | 0.81 | 0 | 0 | 0 | not significant |
| 12120 | GO_DEFENSE_RESPONSE_TO_BACTERIUM                           | 1.20 | 0.80 | 0 | 0 | 0 | not significant |
| 12121 | MIKKELSEN_MCV6_HCP_WITH_H3K27ME3                           | 1.20 | 0.80 | 0 | 0 | 0 | not significant |
| 12122 | BENPORATH_ES_CORE_NINE_CORRELATED                          | 1.20 | 0.79 | 0 | 0 | 0 | not significant |
| 12123 | CHR16Q24                                                   | 1.20 | 0.79 | 0 | 0 | 0 | not significant |
| 12124 | GO_INTRINSIC_APOPTOTIC_SIGNALING_PATHWAY_IN_RESPONSE_TO_DI | 1.20 | 0.79 | 0 | 0 | 0 | not significant |
| 12125 | IVANOVA_HEMATOPOIESIS_STEM_CELL                            | 1.20 | 0.77 | 0 | 0 | 0 | not significant |
| 12126 | REACTOME_PI3K_AKT_SIGNALING_IN_CANCER                      | 1.20 | 0.76 | 0 | 0 | 0 | not significant |
| 12127 | GO_GLYCOSAMINOGLYCAN_BINDING                               | 1.20 | 0.75 | 0 | 0 | 0 | not significant |
| 12128 | GO_MAINTENANCE_OF_PROTEIN_LOCATION_IN_CELL                 | 1.20 | 0.72 | 0 | 0 | 0 | not significant |
| 12129 | GO_PROTEIN_KINASE_C_BINDING                                | 1.20 | 0.72 | 0 | 0 | 0 | not significant |
| 12130 | YAGI_AML_RELAPSE_PROGNOSIS                                 | 1.20 | 0.69 | 0 | 0 | 0 | not significant |
| 12131 | ZHAN_MULTIPLE_MYELOMA_PR_DN                                | 1.20 | 0.66 | 0 | 0 | 0 | not significant |
| 12132 | GO_ACTIVATED_T_CELL_PROLIFERATION                          | 1.20 | 0.64 | 0 | 0 | 0 | not significant |
| 12133 | GO GRANULOCYTE DIFFERENTIATION                             | 1.20 | 0.64 | 0 | 0 | 0 | not significant |
| 12134 | GO_REGULATION_OF_ACUTE_INFLAMMATORY_RESPONSE               | 1.20 | 0.64 | 0 | 0 | 0 | not significant |
| 12135 | GO_POSITIVE_REGULATION_OF_ERYTHROCYTE_DIFFERENTIATION      | 1.20 | 0.63 | 0 | 0 | 0 | not significant |
| 12136 | KEGG_AUTOIMMUNE_THYROID_DISEASE                            | 1.20 | 0.63 | 0 | 0 | 0 | not significant |
| 12137 | PID_SYNDACAN_3_PATHWAY                                     | 1.20 | 0.61 | 0 | 0 | 0 | not significant |
| 12138 | XU_RESPONSE_TO_TRETINOIN_UP                                | 1.20 | 0.61 | 0 | 0 | 0 | not significant |
| 12139 | GO_REGULATION_OF_MYD88_INDEPENDENT_TOLL_LIKE_RECEPTOR_S    | 1.20 | 0.60 | 0 | 0 | 0 | not significant |
| 12140 | GO_TRIGLYCERIDE_METABOLIC_PROCESS                          | 1.20 | 0.60 | 0 | 0 | 0 | not significant |
| 12141 | HOLLERN_SOLID_NODULAR_BREAST_TUMOR_DN                      | 1.20 | 0.60 | 0 | 0 | 0 | not significant |
| 12142 | COWLING_MYCN_TARGETS                                       | 1.20 | 0.59 | 0 | 0 | 0 | not significant |
| 12143 | GO_PYRIMIDINE_NUCLEOBASE_METABOLIC_PROCESS                 | 1.20 | 0.59 | 0 | 0 | 0 | not significant |
| 12144 | GO_REGULATION_OF_POSTSYNAPTIC_DENSITY_ORGANIZATION         | 1.20 | 0.59 | 0 | 0 | 0 | not significant |
| 12145 | REACTOME_WNT_MEDIATED_ACTIVATION_OF_DVL                    | 1.20 | 0.59 | 0 | 0 | 0 | not significant |
| 12146 | RORIE_TARGETS_OF_EWSR1_FL11_FUSION_DN                      | 1.20 | 0.59 | 0 | 0 | 0 | not significant |
| 12147 | BOYALTI_LIVER_CANCER_SUBCLASS_G56_UP                       | 1.20 | 0.58 | 0 | 0 | 0 | not significant |
| 12148 | GO_DNA_INTEGRATION                                         | 1.20 | 0.58 | 0 | 0 | 0 | not significant |
| 12149 | GO_HISTONE_DEMETHYLASE_ACTIVITY_H3_K9_SPECIFIC_            | 1.20 | 0.58 | 0 | 0 | 0 | not significant |
| 12150 | GO_MALE_SEX_DETERMINATION                                  | 1.20 | 0.58 | 0 | 0 | 0 | not significant |
| 12151 | GO_POSITIVE_REGULATION_OF_DNA_LIGATION                     | 1.20 | 0.58 | 0 | 0 | 0 | not significant |
| 12152 | GO_CHANGES_TO_DNA_METHYLATION_INVOLVED_IN_EMBRYO_DEVELO    | 1.20 | 0.57 | 0 | 0 | 0 | not significant |
| 12153 | GO_SPHINGOLIPID_TRANSPORTER_ACTIVITY                       | 1.20 | 0.57 | 0 | 0 | 0 | not significant |
| 12154 | GO_HIGH_VOLTAGE_GATED_CALCIIUM_CHANNEL_ACTIVITY            | 1.20 | 0.56 | 0 | 0 | 0 | not significant |
| 12155 | GO_VOLTAGE_GATED_SODIUM_CHANNEL_COMPLEX                    | 1.20 | 0.56 | 0 | 0 | 0 | not significant |
| 12156 | GO_BONE TRABECULA MORPHOGENESIS                            | 1.20 | 0.53 | 0 | 0 | 0 | not significant |
| 12157 | DUTERTRE ESTRADIOL_RESPONSE_24HR_DN                        | 1.21 | 1.26 | 0 | 0 | 0 | not significant |
| 12158 | WANG_LMO4_TARGETS_UP                                       | 1.21 | 1.08 | 0 | 0 | 0 | not significant |
| 12159 | GO_MALE_GAMETE_GENERATION                                  | 1.21 | 1.06 | 0 | 0 | 0 | not significant |
| 12160 | REACTOME_SIGNALING_BY_ROBO_RECEPTORS                       | 1.21 | 1.01 | 0 | 0 | 0 | not significant |
| 12161 | GO_NEURAL_TUBE_DEVELOPMENT                                 | 1.21 | 0.90 | 0 | 0 | 0 | not significant |
| 12162 | MCBRYAN_PUBERTAL_BREAST_4_5WK_UP                           | 1.21 | 0.90 | 0 | 0 | 0 | not significant |
| 12163 | DELYS_THYROID_CANCER_DN                                    | 1.21 | 0.88 | 0 | 0 | 0 | not significant |
| 12164 | SHEDDEN_LUNG_CANCER_GOOD_SURVIVAL_A4                       | 1.21 | 0.87 | 0 | 0 | 0 | not significant |
| 12165 | KRAS.600_UP.V1_UP                                          | 1.21 | 0.82 | 0 | 0 | 0 | not significant |
| 12166 | GO_APICAL_JUNCTION_COMPLEX                                 | 1.21 | 0.81 | 0 | 0 | 0 | not significant |
| 12167 | GO_TUMOR_NECROSIS_FACTOR_SUPERFAMILY_CYTOKINE_PRODUCTIC    | 1.21 | 0.79 | 0 | 0 | 0 | not significant |
| 12168 | NIKOLSKY_BREAST_CANCER_16Q24_AMPLICON                      | 1.21 | 0.76 | 0 | 0 | 0 | not significant |
| 12169 | YAUCH_HEDGEHOG_SIGNALING_PARACRINE_UP                      | 1.21 | 0.76 | 0 | 0 | 0 | not significant |
| 12170 | GO_REGULATION_OF_TUMOR_NECROSIS_FACTOR_MEDIATED_SIGNALIN   | 1.21 | 0.75 | 0 | 0 | 0 | not significant |
| 12171 | GO_PROTEOGLYCAN_METABOLIC_PROCESS                          | 1.21 | 0.73 | 0 | 0 | 0 | not significant |
| 12172 | KEGG_CELL_ADHESION_MOLECULES_CAMS                          | 1.21 | 0.73 | 0 | 0 | 0 | not significant |
| 12173 | GO_CELLULAR_RESPONSE_TO_CALCIIUM_ION                       | 1.21 | 0.72 | 0 | 0 | 0 | not significant |
| 12174 | MARSON_FOXP3_TARGETS_DN                                    | 1.21 | 0.72 | 0 | 0 | 0 | not significant |
| 12175 | BOYLAN_MULTIPLE_MYELOMA_D_CLUSTER_DN                       | 1.21 | 0.70 | 0 | 0 | 0 | not significant |
| 12176 | GO_ANTI-MICROBIAL_HUMORAL_RESPONSE                         | 1.21 | 0.70 | 0 | 0 | 0 | not significant |
| 12177 | FONTAINE_PAPILLARY_THYROID_CARCINOMA_DN                    | 1.21 | 0.69 | 0 | 0 | 0 | not significant |
| 12178 | GO_GPI_ANCHOR_BIOSYNTHETIC_PROCESS                         | 1.21 | 0.68 | 0 | 0 | 0 | not significant |
| 12179 | GO_IONOTROPIC GLUTAMATE RECEPTOR_BINDING                   | 1.21 | 0.68 | 0 | 0 | 0 | not significant |
| 12180 | GO_STORE_OPERATED_CALCIIUM_ENTRY                           | 1.21 | 0.68 | 0 | 0 | 0 | not significant |
| 12181 | DAIRKEE_CANCER_PRONE_RESPONSE_E2                           | 1.21 | 0.67 | 0 | 0 | 0 | not significant |
| 12182 | STREICHER_LSM1_TARGETS_UP                                  | 1.21 | 0.66 | 0 | 0 | 0 | not significant |
| 12183 | GO_T_CELL_SELECTION                                        | 1.21 | 0.65 | 0 | 0 | 0 | not significant |
| 12184 | GARGALOVIC_RESPONSE_TO_OXIDIZED_PHOSPHOLIPIDS_LIGHTYELLOW  | 1.21 | 0.64 | 0 | 0 | 0 | not significant |
| 12185 | GO_REGULATION_OF_DEFENSE_RESPONSE_TO_BACTERIUM             | 1.21 | 0.64 | 0 | 0 | 0 | not significant |
| 12186 | LE_NEURONAL_DIFFERENTIATION_UP                             | 1.21 | 0.64 | 0 | 0 | 0 | not significant |
| 12187 | VALK_AML_CLUSTER_10                                        | 1.21 | 0.64 | 0 | 0 | 0 | not significant |
| 12188 | GO_POSITIVE_REGULATION_OF_TUMOR_NECROSIS_FACTOR_SECRETIC   | 1.21 | 0.63 | 0 | 0 | 0 | not significant |
| 12189 | GO_REGULATION_OF_SYNAPTIC_VESICLE_ENDOCYTOSIS              | 1.21 | 0.63 | 0 | 0 | 0 | not significant |
| 12190 | MARSHALL_VIRAL_INFECTION_RESPONSE_DN                       | 1.21 | 0.63 | 0 | 0 | 0 | not significant |
| 12191 | REACTOME_NOTCH2_ACTIVATION_AND_TRANSMISSION_OF_SIGNAL_TO   | 1.21 | 0.63 | 0 | 0 | 0 | not significant |
| 12192 | GO_FANCONI_ANAEMIA_NUCLEAR_COMPLEX                         | 1.21 | 0.62 | 0 | 0 | 0 | not significant |
| 12193 | GO_IMMATURE_B_CELL_DIFFERENTIATION                         | 1.21 | 0.62 | 0 | 0 | 0 | not significant |
| 12194 | GO_NUCLEOTIDE_RECEPTOR_ACTIVITY                            | 1.21 | 0.62 | 0 | 0 | 0 | not significant |
| 12195 | GO_NEGATIVE_REGULATION_OF_ANIMAL_ORGAN_MORPHOGENESIS       | 1.21 | 0.61 | 0 | 0 | 0 | not significant |
| 12196 | GO_VOLTAGE_GATED_CHLORIDE_CHANNEL_ACTIVITY                 | 1.21 | 0.61 | 0 | 0 | 0 | not significant |

|       |                                                           |      |      |   |   |   |                 |
|-------|-----------------------------------------------------------|------|------|---|---|---|-----------------|
| 12197 | PID_HEDGEHOG_2PATHWAY                                     | 1.21 | 0.61 | 0 | 0 | 0 | not significant |
| 12198 | REACTOME_PYRIMIDINE_SALVAGE                               | 1.21 | 0.61 | 0 | 0 | 0 | not significant |
| 12199 | SEKI_INFLAMMATORY_RESPONSE_LPS_DN                         | 1.21 | 0.60 | 0 | 0 | 0 | not significant |
| 12200 | MATZUK_POST-IMPLANTATION_AND_POST-PARTUM                  | 1.21 | 0.59 | 0 | 0 | 0 | not significant |
| 12201 | PID_WNT_SIGNALING_PATHWAY                                 | 1.21 | 0.59 | 0 | 0 | 0 | not significant |
| 12202 | GO_CALCMIUM_IION_REGULATED_EXOCYTOSIS_OF_NEUROTRANSMITTER | 1.21 | 0.58 | 0 | 0 | 0 | not significant |
| 12203 | GO_INTERLEUKIN_10_SECRETION                               | 1.21 | 0.58 | 0 | 0 | 0 | not significant |
| 12204 | GO_ORGAN_INDUCTION                                        | 1.21 | 0.58 | 0 | 0 | 0 | not significant |
| 12205 | WANG_NEOPLASTIC_TRANSFORMATION_BY_CCND1_MYC               | 1.21 | 0.58 | 0 | 0 | 0 | not significant |
| 12206 | REACTOME_INTERLEUKIN_27_SIGNALING                         | 1.21 | 0.57 | 0 | 0 | 0 | not significant |
| 12207 | SHI_SPARC_TARGETS_DN                                      | 1.21 | 0.57 | 0 | 0 | 0 | not significant |
| 12208 | GO_SPECTRIN_ASSOCIATED_CYTOSKELETON                       | 1.21 | 0.56 | 0 | 0 | 0 | not significant |
| 12209 | MARSHALL_VIRAL_INFECTION_RESPONSE_UP                      | 1.21 | 0.56 | 0 | 0 | 0 | not significant |
| 12210 | MYLLYKANGAS_AMPLIFICATION_HOT_SPOT_7                      | 1.21 | 0.56 | 0 | 0 | 0 | not significant |
| 12211 | GO_SEQUESTERING_OF_EXTRACELLULAR_LIGAND_FROM_RECEPTOR     | 1.21 | 0.54 | 0 | 0 | 0 | not significant |
| 12212 | GO_REGULATORY_REGION_NUCLEIC_ACID_BINDING                 | 1.22 | 1.38 | 0 | 0 | 0 | not significant |
| 12213 | GO_TRANSMEMBRANE_SIGNALING_RECEPTOR_ACTIVITY              | 1.22 | 1.21 | 0 | 0 | 0 | not significant |
| 12214 | CHARAFE_BREAST_CANCER_LUMINAL_VS_MESENCHYMAL_UP           | 1.22 | 1.12 | 0 | 0 | 0 | not significant |
| 12215 | WANG_CLIM2_TARGETS_UP                                     | 1.22 | 1.07 | 0 | 0 | 0 | not significant |
| 12216 | LINDGREN_BLADDER_CANCER_CLUSTER_2A_DN                     | 1.22 | 0.98 | 0 | 0 | 0 | not significant |
| 12217 | GO_DISTAL_AXON                                            | 1.22 | 0.97 | 0 | 0 | 0 | not significant |
| 12218 | PID_SMAD2_3NUCLEAR_PATHWAY                                | 1.22 | 0.88 | 0 | 0 | 0 | not significant |
| 12219 | BOYALUT_LIVER_CANCER_SUBCLASS_G1_UP                       | 1.22 | 0.86 | 0 | 0 | 0 | not significant |
| 12220 | GO_REGULATION_OF_DNA_RECOMBINATION                        | 1.22 | 0.86 | 0 | 0 | 0 | not significant |
| 12221 | GO_CYTOKINE_ACTIVITY                                      | 1.22 | 0.81 | 0 | 0 | 0 | not significant |
| 12222 | CRX_NRL_DN.V1_DN                                          | 1.22 | 0.80 | 0 | 0 | 0 | not significant |
| 12223 | GO_PHAGOSOME_MATURATION                                   | 1.22 | 0.77 | 0 | 0 | 0 | not significant |
| 12224 | GO_CELLULAR_COMPONENT_MAINTENANCE                         | 1.22 | 0.73 | 0 | 0 | 0 | not significant |
| 12225 | GO_NATURAL_KILLER_CELL_ACTIVATION                         | 1.22 | 0.73 | 0 | 0 | 0 | not significant |
| 12226 | LINDSTEDT_DENDRITIC_CELL_MATURATION_B                     | 1.22 | 0.72 | 0 | 0 | 0 | not significant |
| 12227 | BIOCARTA_GLEEVEC_PATHWAY                                  | 1.22 | 0.71 | 0 | 0 | 0 | not significant |
| 12228 | GO_INTERLEUKIN_8_PRODUCTION                               | 1.22 | 0.70 | 0 | 0 | 0 | not significant |
| 12229 | REACTOME_NICOTINATE_METABOLISM                            | 1.22 | 0.70 | 0 | 0 | 0 | not significant |
| 12230 | MURATA_VIRULENCE_OF_H_PILORI                              | 1.22 | 0.68 | 0 | 0 | 0 | not significant |
| 12231 | GO_ENDOCRINE_HORMONE_SECRETION                            | 1.22 | 0.67 | 0 | 0 | 0 | not significant |
| 12232 | BANDRES_RESPONSE_TO_CARMUSTIN_WITHOUT_MGMT_24HR_UP        | 1.22 | 0.65 | 0 | 0 | 0 | not significant |
| 12233 | CHR7P12                                                   | 1.22 | 0.65 | 0 | 0 | 0 | not significant |
| 12234 | GO_EPITHELIAL_CILIUM_MOVEMENT                             | 1.22 | 0.65 | 0 | 0 | 0 | not significant |
| 12235 | GO_CLATHRIN_SCULPTED_GAMMA_AMINOBUTYRIC_ACID_TRANSPORT_1  | 1.22 | 0.64 | 0 | 0 | 0 | not significant |
| 12236 | GO_MANNOSYL_OLIGOSACCHARIDE_MANNOSIDASE_ACTIVITY          | 1.22 | 0.64 | 0 | 0 | 0 | not significant |
| 12237 | GO_GLYCOSPHINGOLIPID_BIOSYNTHETIC_PROCESS                 | 1.22 | 0.63 | 0 | 0 | 0 | not significant |
| 12238 | GO_NEGATIVE_REGULATION_OF_GLIAL_CELL_DIFFERENTIATION      | 1.22 | 0.63 | 0 | 0 | 0 | not significant |
| 12239 | GO_NUCLEAR_MEMBRANE_PART                                  | 1.22 | 0.63 | 0 | 0 | 0 | not significant |
| 12240 | GO_DETECTION_OF_EXTERNAL_BIOTIC_STIMULUS                  | 1.22 | 0.62 | 0 | 0 | 0 | not significant |
| 12241 | GO_GASTRIC_ACID_SECRETION                                 | 1.22 | 0.62 | 0 | 0 | 0 | not significant |
| 12242 | GO_IRON_COORDINATION_ENTITY_TRANSPORT                     | 1.22 | 0.62 | 0 | 0 | 0 | not significant |
| 12243 | GO_NEGATIVE_REGULATION_OF_OLIGODENDROCYTE_DIFFERENTIATION | 1.22 | 0.62 | 0 | 0 | 0 | not significant |
| 12244 | BIOCARTA_CIRCADIAN_PATHWAY                                | 1.22 | 0.61 | 0 | 0 | 0 | not significant |
| 12245 | GO_INTERMEMBRANE_LIPID_TRANSFER                           | 1.22 | 0.61 | 0 | 0 | 0 | not significant |
| 12246 | GO_MAMMARY_GLAND_EPITHELIAL_CELL_DIFFERENTIATION          | 1.22 | 0.61 | 0 | 0 | 0 | not significant |
| 12247 | GO_NEURAL_PLATE_REGIONALIZATION                           | 1.22 | 0.61 | 0 | 0 | 0 | not significant |
| 12248 | GRANDVAUX_IFN_RESPONSE_NOT_VIA_IRF3                       | 1.22 | 0.61 | 0 | 0 | 0 | not significant |
| 12249 | MATZUK_PREOVULATORY_FOLLICLE                              | 1.22 | 0.61 | 0 | 0 | 0 | not significant |
| 12250 | TURJANSKI_MAPK1_AND_MAPK2_TARGETS                         | 1.22 | 0.61 | 0 | 0 | 0 | not significant |
| 12251 | GO_BERGMANN_GLIAL_CELL_DIFFERENTIATION                    | 1.22 | 0.60 | 0 | 0 | 0 | not significant |
| 12252 | GO_PROTEIN_UFMYLATION                                     | 1.22 | 0.60 | 0 | 0 | 0 | not significant |
| 12253 | REACTOME_THE_ACTIVATION_OF_ARYLSULFATASES                 | 1.22 | 0.59 | 0 | 0 | 0 | not significant |
| 12254 | ZIRN_TRETINON_RESPONSE_WT1_DN                             | 1.22 | 0.59 | 0 | 0 | 0 | not significant |
| 12255 | GO_PHOTORECEPTOR_CELL_OUTER_SEGMENT_ORGANIZATION          | 1.22 | 0.56 | 0 | 0 | 0 | not significant |
| 12256 | ZWANG_TRANSIENTLY_UP_BY_1ST_EGF_PULSE_ONLY                | 1.23 | 2.01 | 0 | 0 | 0 | not significant |
| 12257 | GO_TRANSFERASE_ACTIVITY_TRANSFERRING_GLYCOSYL_GROUPS      | 1.23 | 1.04 | 0 | 0 | 0 | not significant |
| 12258 | GO_REGULATION_OF_SIGNALING_RECEPTOR_ACTIVITY              | 1.23 | 1.01 | 0 | 0 | 0 | not significant |
| 12259 | GO_APPENDAGE_DEVELOPMENT                                  | 1.23 | 0.89 | 0 | 0 | 0 | not significant |
| 12260 | GO_ENDOTHELIAL_CELL_PROLIFERATION                         | 1.23 | 0.84 | 0 | 0 | 0 | not significant |
| 12261 | PEDERSEN_TARGETS_OF_611CTF_ISOFORM_OF_ERBB2               | 1.23 | 0.81 | 0 | 0 | 0 | not significant |
| 12262 | GO_AMINOGLYCAN_BIOSYNTHETIC_PROCESS                       | 1.23 | 0.80 | 0 | 0 | 0 | not significant |
| 12263 | KEGG_CHRONIC_MYELOID_LEUKEMIA                             | 1.23 | 0.80 | 0 | 0 | 0 | not significant |
| 12264 | GO_POSITIVE_REGULATION_OF_INTERFERON_GAMMA_PRODUCTION     | 1.23 | 0.78 | 0 | 0 | 0 | not significant |
| 12265 | GO_VOLTAGE_GATED_CATION_CHANNEL_ACTIVITY                  | 1.23 | 0.75 | 0 | 0 | 0 | not significant |
| 12266 | WINNEPENNINGCKX_MELANOMA_METASTASIS_DN                    | 1.23 | 0.75 | 0 | 0 | 0 | not significant |
| 12267 | GO_POSITIVE_REGULATION_OF_BONE_MINERALIZATION             | 1.23 | 0.72 | 0 | 0 | 0 | not significant |
| 12268 | REACTOME_SIALIC_ACID_METABOLISM                           | 1.23 | 0.72 | 0 | 0 | 0 | not significant |
| 12269 | BIOCARTA_TPO_PATHWAY                                      | 1.23 | 0.70 | 0 | 0 | 0 | not significant |
| 12270 | GO_LEFT_RIGHT_PATTERN_FORMATION                           | 1.23 | 0.70 | 0 | 0 | 0 | not significant |
| 12271 | LIEN_BREAST_CARCINOMA_METAPLASTIC_VS_DUCTAL_DN            | 1.23 | 0.70 | 0 | 0 | 0 | not significant |
| 12272 | PID_IL2_STAT5_PATHWAY                                     | 1.23 | 0.70 | 0 | 0 | 0 | not significant |
| 12273 | BERTUCCI_INVASIVE_CARCINOMA_DUCTAL_VS_LOBULAR_DN          | 1.23 | 0.69 | 0 | 0 | 0 | not significant |
| 12274 | GO_CAMP_RESPONSE_ELEMENT_BINDING                          | 1.23 | 0.69 | 0 | 0 | 0 | not significant |
| 12275 | HOLLEMAN_VINCRIStINE_RESISTANCE_ALL_UP                    | 1.23 | 0.69 | 0 | 0 | 0 | not significant |
| 12276 | GO_TRANSCRIPTION_COREPRESSOR_BINDING                      | 1.23 | 0.68 | 0 | 0 | 0 | not significant |
| 12277 | HATADA_METHYLATED_IN_LUNG_CANCER_DN                       | 1.23 | 0.68 | 0 | 0 | 0 | not significant |
| 12278 | REACTOME_RHO_GTPASES_ACTIVATE_RHOTEKIN_AND_RHOPHILINS     | 1.23 | 0.67 | 0 | 0 | 0 | not significant |
| 12279 | WESTON_VEGFA_TARGETS_6HR                                  | 1.23 | 0.67 | 0 | 0 | 0 | not significant |
| 12280 | GO_REGULATION_OF_Glutamate_RECEPTOR_SIGNALING_PATHWAY     | 1.23 | 0.66 | 0 | 0 | 0 | not significant |
| 12281 | GO_SMAD_PROTEIN_COMPLEX                                   | 1.23 | 0.66 | 0 | 0 | 0 | not significant |
| 12282 | GO_ACROSOMAL_MEMBRANE                                     | 1.23 | 0.65 | 0 | 0 | 0 | not significant |
| 12283 | BIOCARTA_SHH_PATHWAY                                      | 1.23 | 0.64 | 0 | 0 | 0 | not significant |
| 12284 | GO_ARP2_3_COMPLEX_BINDING                                 | 1.23 | 0.64 | 0 | 0 | 0 | not significant |
| 12285 | GO_MALE_MEIOSIS_1                                         | 1.23 | 0.64 | 0 | 0 | 0 | not significant |
| 12286 | GO_CYCLIC_NUCLEOTIDE_PHOSPHODIESTERASE_ACTIVITY           | 1.23 | 0.63 | 0 | 0 | 0 | not significant |
| 12287 | GO_CELLULAR_RESPONSE_TO_CHOLESTEROL                       | 1.23 | 0.62 | 0 | 0 | 0 | not significant |
| 12288 | GO_FOUR_WAY_JUNCTION_HELICASE_ACTIVITY                    | 1.23 | 0.61 | 0 | 0 | 0 | not significant |
| 12289 | REACTOME_FRS_MEDIATED_FGFR1_SIGNALING                     | 1.23 | 0.61 | 0 | 0 | 0 | not significant |
| 12290 | REACTOME_TFAP2_2_FAMILY_REGULATES_TRANSCRIPTION_OF_GF     | 1.23 | 0.61 | 0 | 0 | 0 | not significant |
| 12291 | GO_ESTABLISHMENT_OF_PROTEIN_LOCALIZATION_TO_POSTSYNAPTIC_ | 1.23 | 0.59 | 0 | 0 | 0 | not significant |
| 12292 | GARY_CD5_TARGETS_UP                                       | 1.24 | 1.49 | 0 | 0 | 0 | not significant |
| 12293 | GO_LEUKOCYTE_DIFFERENTIATION                              | 1.24 | 1.33 | 0 | 0 | 0 | not significant |
| 12294 | PENG_RAPAMYCIN_RESPONSE_UP                                | 1.24 | 1.00 | 0 | 0 | 0 | not significant |
| 12295 | GAVIN_FOXP3_TARGETS_CLUSTER_P4                            | 1.24 | 0.84 | 0 | 0 | 0 | not significant |
| 12296 | GO_REGULATION_OF_BONE_MINERALIZATION                      | 1.24 | 0.79 | 0 | 0 | 0 | not significant |
| 12297 | HOLLEMAN_VINCRIStINE_RESISTANCE_B_ALL_UP                  | 1.24 | 0.79 | 0 | 0 | 0 | not significant |
| 12298 | GO_DETERMINATION_OF_HEART_LEFT_RIGHT_ASYMMETRY            | 1.24 | 0.78 | 0 | 0 | 0 | not significant |
| 12299 | VECCHI_GASTRIC_CANCER_ADVANCED_VS_EARLY_UP                | 1.24 | 0.78 | 0 | 0 | 0 | not significant |
| 12300 | GO_MEMBRANE_LIPID_CATABOLIC_PROCESS                       | 1.24 | 0.75 | 0 | 0 | 0 | not significant |
| 12301 | BIOCARTA_G1_PATHWAY                                       | 1.24 | 0.74 | 0 | 0 | 0 | not significant |
| 12302 | GO_INFLAMMATORY_RESPONSE_TO_ANTIAGENIC_STIMULUS           | 1.24 | 0.74 | 0 | 0 | 0 | not significant |
| 12303 | YANG_BREAST_CANCER_ESR1_LASER_UP                          | 1.24 | 0.73 | 0 | 0 | 0 | not significant |
| 12304 | GO_MAINTENANCE_OF_PROTEIN_LOCATION_IN_NUCLEUS             | 1.24 | 0.72 | 0 | 0 | 0 | not significant |
| 12305 | GO_NAD_BIOSYNTHETIC_PROCESS                               | 1.24 | 0.71 | 0 | 0 | 0 | not significant |

|       |                                                                   |      |      |   |   |   |                 |
|-------|-------------------------------------------------------------------|------|------|---|---|---|-----------------|
| 12306 | MIKKELSEN_ES_ICP_WITH_H3K4ME3_AND_H3K27ME3                        | 1.24 | 0.70 | 0 | 0 | 0 | not significant |
| 12307 | GO_HEPARAN_SULFATE_SULFOTRANSFERASE_ACTIVITY                      | 1.24 | 0.69 | 0 | 0 | 0 | not significant |
| 12308 | REACTOME_ERYTHROPOIETIN_ACTIVATES_PHOSPHOINOSITIDE_3_KINASE       | 1.24 | 0.69 | 0 | 0 | 0 | not significant |
| 12309 | GO_MITOTIC_DNA_REPLICATION                                        | 1.24 | 0.67 | 0 | 0 | 0 | not significant |
| 12310 | GO_PHOSPHORYLASE_KINASE_COMPLEX                                   | 1.24 | 0.67 | 0 | 0 | 0 | not significant |
| 12311 | GO_REGULATION_OF_DNA_DIRECTED_DNA_POLYMERASE_ACTIVITY             | 1.24 | 0.67 | 0 | 0 | 0 | not significant |
| 12312 | VALK_AML_CLUSTER_2                                                | 1.24 | 0.67 | 0 | 0 | 0 | not significant |
| 12313 | CHR4Q26                                                           | 1.24 | 0.66 | 0 | 0 | 0 | not significant |
| 12314 | BAKER_HEMATOPOESIS_STAT5_TARGETS                                  | 1.24 | 0.65 | 0 | 0 | 0 | not significant |
| 12315 | GO_INTRINSIC_COMPONENT_OF_POSTSYNAPTIC_DENSITY_MEMBRANE           | 1.24 | 0.65 | 0 | 0 | 0 | not significant |
| 12316 | GO_MESODERMAL_CELL_DIFFERENTIATION                                | 1.24 | 0.65 | 0 | 0 | 0 | not significant |
| 12317 | GO_TRANSMEMBRANE_RECEPTOR_PROTEIN_SERINE_THREONINE_KINASE         | 1.24 | 0.65 | 0 | 0 | 0 | not significant |
| 12318 | GO_RESPONSE_TO_CISPLATIN                                          | 1.24 | 0.64 | 0 | 0 | 0 | not significant |
| 12319 | GO_ATP_BINDING_CASSETTE_ABC_TRANSPORTER_COMPLEX                   | 1.24 | 0.63 | 0 | 0 | 0 | not significant |
| 12320 | GO_VESICLE_UNCOATING                                              | 1.24 | 0.63 | 0 | 0 | 0 | not significant |
| 12321 | GO_REGULATION_OF_CARDIAC_EPITHELIAL_TO_MESENCHYMAL_TRANSITION     | 1.24 | 0.62 | 0 | 0 | 0 | not significant |
| 12322 | OSWALD_HEMATOPOIETIC_STEM_CELL_IN_COLLAGEN_GEL_DN                 | 1.25 | 1.17 | 0 | 0 | 0 | not significant |
| 12323 | GO_LYMPHOCYTE_MEDIATED_IMMUNITY                                   | 1.25 | 1.10 | 0 | 0 | 0 | not significant |
| 12324 | SENESE_HDAC1_TARGETS_DN                                           | 1.25 | 1.08 | 0 | 0 | 0 | not significant |
| 12325 | REACTOME_REGULATION_OF_EXPRESSION_OF_SLITS_AND_ROBO3              | 1.25 | 1.00 | 0 | 0 | 0 | not significant |
| 12326 | GO_FERTILIZATION                                                  | 1.25 | 0.89 | 0 | 0 | 0 | not significant |
| 12327 | GO_AUTOPHAGOSOME                                                  | 1.25 | 0.87 | 0 | 0 | 0 | not significant |
| 12328 | GO_CYTOKINE_METABOLIC_PROCESS                                     | 1.25 | 0.86 | 0 | 0 | 0 | not significant |
| 12329 | KRAS.PROSTATE_UP.V1_DN                                            | 1.25 | 0.86 | 0 | 0 | 0 | not significant |
| 12330 | GO_INTERFERON_GAMMA_PRODUCTION                                    | 1.25 | 0.84 | 0 | 0 | 0 | not significant |
| 12331 | JL_RESPONSE_TO_FSH_UP                                             | 1.25 | 0.83 | 0 | 0 | 0 | not significant |
| 12332 | REACTOME_INTERLEUKIN_3_INTERLEUKIN_5_AND_GM-CSF_SIGNALING         | 1.25 | 0.81 | 0 | 0 | 0 | not significant |
| 12333 | KRAS.300_UP.V1_DN                                                 | 1.25 | 0.80 | 0 | 0 | 0 | not significant |
| 12334 | BOGNI_TREATMENT_RELATED_MYELOID_LEUKEMIA_DN                       | 1.25 | 0.76 | 0 | 0 | 0 | not significant |
| 12335 | GO_PROTEIN_TARGETING_TO_LYSOSOME                                  | 1.25 | 0.76 | 0 | 0 | 0 | not significant |
| 12336 | GO_HEME_TRANSPORTER_ACTIVITY                                      | 1.25 | 0.74 | 0 | 0 | 0 | not significant |
| 12337 | GO_INTEGRAL_COMPONENT_OF_SYNAPTIC_VESICLE_MEMBRANE                | 1.25 | 0.74 | 0 | 0 | 0 | not significant |
| 12338 | GO_NEGATIVE_REGULATION_OF_BMP_SIGNALING_PATHWAY                   | 1.25 | 0.74 | 0 | 0 | 0 | not significant |
| 12339 | GO_RESPONSE_TO_ZINC_ION                                           | 1.25 | 0.74 | 0 | 0 | 0 | not significant |
| 12340 | RIZ_ERYTHROID_DIFFERENTIATION_HBZ                                 | 1.25 | 0.74 | 0 | 0 | 0 | not significant |
| 12341 | REACTOME_DSCAM_INTERACTIONS                                       | 1.25 | 0.72 | 0 | 0 | 0 | not significant |
| 12342 | REACTOME_REGULATION_OF_RUNX1_EXPRESSION_AND_ACTIVITY              | 1.25 | 0.71 | 0 | 0 | 0 | not significant |
| 12343 | BARRIER_COLON_CANCER_RECURRENCE_DN                                | 1.25 | 0.70 | 0 | 0 | 0 | not significant |
| 12344 | GO_SULFOTRANSFERASE_ACTIVITY                                      | 1.25 | 0.70 | 0 | 0 | 0 | not significant |
| 12345 | GO_BETA_CATENIN_DESTRUCTION_COMPLEX_DISASSEMBLY                   | 1.25 | 0.69 | 0 | 0 | 0 | not significant |
| 12346 | REACTOME_ACTIVATION_OF_THE_AP_1_FAMILY_OF_TRANSCRIPTION_FACTORS   | 1.25 | 0.69 | 0 | 0 | 0 | not significant |
| 12347 | GO_CYCLIN_DEPENDENT_PROTEIN_SERINE_THREONINE_KINASE_INHIBITOR     | 1.25 | 0.68 | 0 | 0 | 0 | not significant |
| 12348 | GO_CYSSTEINE_TYPE_ENDOPEPTIDASE_ACTIVITY_INVOLVED_IN_APOPTOSIS    | 1.25 | 0.68 | 0 | 0 | 0 | not significant |
| 12349 | GO_NEGATIVE_REGULATION_OF_PHAGOCYTOSIS                            | 1.25 | 0.68 | 0 | 0 | 0 | not significant |
| 12350 | GO_POSITIVE_REGULATION_OF_GRANULOCYTE_MACROPHAGE_COLONY_FORMATION | 1.25 | 0.68 | 0 | 0 | 0 | not significant |
| 12351 | GO_POSITIVE_REGULATION_OF_HISTONE_H3_K9_METHYLATION               | 1.25 | 0.68 | 0 | 0 | 0 | not significant |
| 12352 | GO_POSITIVE_REGULATION_OF_SMOOTH_MUSCLE_CONTRACTION               | 1.25 | 0.68 | 0 | 0 | 0 | not significant |
| 12353 | GO_REGULATION_OF_CD8_POSITIVE_ALPHA_BETA_T_CELL_DIFFERENTIATION   | 1.25 | 0.68 | 0 | 0 | 0 | not significant |
| 12354 | GO_CERAMIDE_BINDING                                               | 1.25 | 0.67 | 0 | 0 | 0 | not significant |
| 12355 | GO_NEGATIVE_REGULATION_OF_RECEPTOR_MEDIATED_ENDOCYTOSIS           | 1.25 | 0.67 | 0 | 0 | 0 | not significant |
| 12356 | REACTOME_FOXO_MEDIATED_TRANSCRIPTION_OF_CELL_CYCLE_GENE           | 1.25 | 0.67 | 0 | 0 | 0 | not significant |
| 12357 | GO_NEGATIVE_REGULATION_OF_ALPHA_BETA_T_CELL_PROLIFERATION         | 1.25 | 0.66 | 0 | 0 | 0 | not significant |
| 12358 | GO_RESPONSE_TO_MURAMYLDIPEPTIDE                                   | 1.25 | 0.66 | 0 | 0 | 0 | not significant |
| 12359 | MATZUK_POSTIMPLANTATION_AND_POSTPARTUM                            | 1.25 | 0.66 | 0 | 0 | 0 | not significant |
| 12360 | SCHOEN_MFKB_SIGNALING                                             | 1.25 | 0.66 | 0 | 0 | 0 | not significant |
| 12361 | GO_REGULATION_OF_HAIR_CYCLE                                       | 1.25 | 0.65 | 0 | 0 | 0 | not significant |
| 12362 | GO_PLASMA_MEMBRANE_PHOSPHOLIPID_SCRAMBLING                        | 1.25 | 0.64 | 0 | 0 | 0 | not significant |
| 12363 | LIEN_BREAST_CARCINOMA_METAPLASTIC                                 | 1.25 | 0.64 | 0 | 0 | 0 | not significant |
| 12364 | REACTOME_INTERLEUKIN_6_SIGNALING                                  | 1.25 | 0.64 | 0 | 0 | 0 | not significant |
| 12365 | GO_POSITIVE_REGULATION_OF_INTEGRIN_ACTIVATION                     | 1.25 | 0.63 | 0 | 0 | 0 | not significant |
| 12366 | GO_POLYNUCLEOTIDE_DEPHOSPHORYLATION                               | 1.25 | 0.62 | 0 | 0 | 0 | not significant |
| 12367 | GO_PARENTAL_BEHAVIOR                                              | 1.25 | 0.60 | 0 | 0 | 0 | not significant |
| 12368 | GO_PEPTIDYL_TYROSINE_MODIFICATION                                 | 1.26 | 1.15 | 0 | 0 | 0 | not significant |
| 12369 | GO_B_CELL_ACTIVATION                                              | 1.26 | 1.09 | 0 | 0 | 0 | not significant |
| 12370 | SCHLOSSER_SERUM_RESPONSE_UP                                       | 1.26 | 1.01 | 0 | 0 | 0 | not significant |
| 12371 | GAUSSMANN_MLL_AF4_FUSION_TARGETS_C_UP                             | 1.26 | 0.99 | 0 | 0 | 0 | not significant |
| 12372 | GO_LIPOPROTEIN_BIOSYNTHETIC_PROCESS                               | 1.26 | 0.95 | 0 | 0 | 0 | not significant |
| 12373 | RUIZ_TNC_TARGETS_UP                                               | 1.26 | 0.95 | 0 | 0 | 0 | not significant |
| 12374 | KEGG_PROSTATE_CANCER                                              | 1.26 | 0.93 | 0 | 0 | 0 | not significant |
| 12375 | BOYLAN_MULTIPLE_MYELOMA_C_DN                                      | 1.26 | 0.90 | 0 | 0 | 0 | not significant |
| 12376 | VART_KSHV_INFECTION_ANGIOGENIC_MARKERS_UP                         | 1.26 | 0.89 | 0 | 0 | 0 | not significant |
| 12377 | GO_VOLTAGE_GATED_ION_CHANNEL_ACTIVITY                             | 1.26 | 0.87 | 0 | 0 | 0 | not significant |
| 12378 | GO_B_CELL_PROLIFERATION                                           | 1.26 | 0.86 | 0 | 0 | 0 | not significant |
| 12379 | BILANGES_RAPAMYCIN_SENSITIVE_VIA_TSC1_AND_TSC2                    | 1.26 | 0.85 | 0 | 0 | 0 | not significant |
| 12380 | DELPUCH_FOXO3_TARGETS_UP                                          | 1.26 | 0.85 | 0 | 0 | 0 | not significant |
| 12381 | FURUKAWA_DUSP6_TARGETS_PC135_UP                                   | 1.26 | 0.83 | 0 | 0 | 0 | not significant |
| 12382 | TURASHVILI_BREAST_LOBULAR_CARCINOMA_VS_LOBULAR_NORMAL_DN          | 1.26 | 0.81 | 0 | 0 | 0 | not significant |
| 12383 | LIM_MAMMARY_LUMINAL_PROGENITOR_UP                                 | 1.26 | 0.77 | 0 | 0 | 0 | not significant |
| 12384 | BECKER_TAMOXIFEN_RESISTANCE_DN                                    | 1.26 | 0.76 | 0 | 0 | 0 | not significant |
| 12385 | GO_PITUITARY_GLAND_DEVELOPMENT                                    | 1.26 | 0.76 | 0 | 0 | 0 | not significant |
| 12386 | GO_REGULATION_OF_PROTEIN_LOCALIZATION_TO_SYNAPSE                  | 1.26 | 0.75 | 0 | 0 | 0 | not significant |
| 12387 | GO_REGULATION_OF_CLATHRIN_DEPENDENT_ENDOCYTOSIS                   | 1.26 | 0.74 | 0 | 0 | 0 | not significant |
| 12388 | APPEL_IMATINIB_RESPONSE                                           | 1.26 | 0.73 | 0 | 0 | 0 | not significant |
| 12389 | KEGG_ARACHIDONIC_ACID_METABOLISM                                  | 1.26 | 0.73 | 0 | 0 | 0 | not significant |
| 12390 | BIOCARTA_GH_PATHWAY                                               | 1.26 | 0.72 | 0 | 0 | 0 | not significant |
| 12391 | GO_FIBROBLAST_GROWTH_FACTOR_BINDING                               | 1.26 | 0.72 | 0 | 0 | 0 | not significant |
| 12392 | GO_REGULATION_OF_GLYCOGEN_METABOLIC_PROCESS                       | 1.26 | 0.72 | 0 | 0 | 0 | not significant |
| 12393 | GARGALOVIC_RESPONSE_TO_OXIDIZED_PHOSPHOLIPIDS_TAN_DN              | 1.26 | 0.71 | 0 | 0 | 0 | not significant |
| 12394 | GO_CYTOLYSIS                                                      | 1.26 | 0.71 | 0 | 0 | 0 | not significant |
| 12395 | SA_REG_CASCADE_OF_CYCLIN_EXPRESSION                               | 1.26 | 0.71 | 0 | 0 | 0 | not significant |
| 12396 | TOMLINS_METASTASIS_DN                                             | 1.26 | 0.71 | 0 | 0 | 0 | not significant |
| 12397 | GO_NEGATIVE_REGULATION_OF_LIPOPOLYSACCHARIDE_MEDIATED_SIGNALING   | 1.26 | 0.70 | 0 | 0 | 0 | not significant |
| 12398 | WU_ALZHEIMER_DISEASE_UP                                           | 1.26 | 0.70 | 0 | 0 | 0 | not significant |
| 12399 | AMUNDSON_GAMMA_RADIATION_RESISTANCE                               | 1.26 | 0.69 | 0 | 0 | 0 | not significant |
| 12400 | GO_CD8_POSITIVE_ALPHA_BETA_T_CELL_DIFFERENTIATION                 | 1.26 | 0.69 | 0 | 0 | 0 | not significant |
| 12401 | GO_REGULATION_OF_STORE_OPERATED_CALCIIUM_ENTRY                    | 1.26 | 0.69 | 0 | 0 | 0 | not significant |
| 12402 | GO_SINGLE_STRANDED_DNA_3_5_EXONUCLEOTIDYLTRANSFERASE_ACTIVITY     | 1.26 | 0.69 | 0 | 0 | 0 | not significant |
| 12403 | GO_NEGATIVE_REGULATION_OF_OSTEOBLAST_PROLIFERATION                | 1.26 | 0.68 | 0 | 0 | 0 | not significant |
| 12404 | REACTOME_INTERLEUKIN_23_SIGNALING                                 | 1.26 | 0.68 | 0 | 0 | 0 | not significant |
| 12405 | CHR4P11                                                           | 1.26 | 0.67 | 0 | 0 | 0 | not significant |
| 12406 | GO_EPITHELIAL_TO_MESENCHYMAL_TRANSITION_INVOLVED_IN_ENDOCYTOSIS   | 1.26 | 0.67 | 0 | 0 | 0 | not significant |
| 12407 | GO_PROTEIN_CARBOXYL_O_METHYLTRANSFERASE_ACTIVITY                  | 1.26 | 0.67 | 0 | 0 | 0 | not significant |
| 12408 | GO_BUBBLE_DNA_BINDING                                             | 1.26 | 0.66 | 0 | 0 | 0 | not significant |
| 12409 | GO_NUCLEAR_MEMBRANE_PROTEIN_COMPLEX                               | 1.26 | 0.66 | 0 | 0 | 0 | not significant |
| 12410 | GO_ACYLGlycerol_LIPASE_ACTIVITY                                   | 1.26 | 0.65 | 0 | 0 | 0 | not significant |
| 12411 | ZHONG_RESPONSE_TO_AZACITIDINE_AND_TSA_UP                          | 1.27 | 1.10 | 0 | 0 | 0 | not significant |
| 12412 | GO_REGULATION_OF_T_CELL_DIFFERENTIATION                           | 1.27 | 1.00 | 0 | 0 | 0 | not significant |
| 12413 | PTEN_DNV2_DN                                                      | 1.27 | 1.00 | 0 | 0 | 0 | not significant |
| 12414 | GO_CELL_CELL_JUNCTION_ASSEMBLY                                    | 1.27 | 0.93 | 0 | 0 | 0 | not significant |

|       |                                                                          |      |      |   |   |   |                 |
|-------|--------------------------------------------------------------------------|------|------|---|---|---|-----------------|
| 12415 | GO_GLYCOLIPID_BIOSYNTHETIC_PROCESS                                       | 1.27 | 0.91 | 0 | 0 | 0 | not significant |
| 12416 | GO_T_CELL_ACTIVATION_INVOLVED_IN_IMMUNE_RESPONSE                         | 1.27 | 0.90 | 0 | 0 | 0 | not significant |
| 12417 | GO_REGULATION_OF_TISSUE_REMODELING                                       | 1.27 | 0.89 | 0 | 0 | 0 | not significant |
| 12418 | CHR15Q26                                                                 | 1.27 | 0.88 | 0 | 0 | 0 | not significant |
| 12419 | DORSAM_HOXA9_TARGETS_DN                                                  | 1.27 | 0.86 | 0 | 0 | 0 | not significant |
| 12420 | EHLERS_ANEUPLOIDY_UP                                                     | 1.27 | 0.85 | 0 | 0 | 0 | not significant |
| 12421 | GO_HOMOLOGOUS_CHROMOSOME_SEGREGATION                                     | 1.27 | 0.85 | 0 | 0 | 0 | not significant |
| 12422 | KEGG_LEISHMANIA_INFECTION                                                | 1.27 | 0.83 | 0 | 0 | 0 | not significant |
| 12423 | NICK_RESPONSE_TO_PROC_TREATMENT_DN                                       | 1.27 | 0.83 | 0 | 0 | 0 | not significant |
| 12424 | PID_NFAT_TFPATHWAY                                                       | 1.27 | 0.83 | 0 | 0 | 0 | not significant |
| 12425 | GO_MANNOSYLTRANSFERASE_ACTIVITY                                          | 1.27 | 0.82 | 0 | 0 | 0 | not significant |
| 12426 | GO_NEGATIVE_REGULATION_OF_DNA_RECOMBINATION                              | 1.27 | 0.82 | 0 | 0 | 0 | not significant |
| 12427 | DAUER_STAT3_TARGETS_UP                                                   | 1.27 | 0.81 | 0 | 0 | 0 | not significant |
| 12428 | LUI_THYROID_CANCER_CLUSTER_3                                             | 1.27 | 0.79 | 0 | 0 | 0 | not significant |
| 12429 | ZHAN_MULTIPLE_MYELOMA_CD2_UP                                             | 1.27 | 0.79 | 0 | 0 | 0 | not significant |
| 12430 | GO_BCL_2_FAMILY_PROTEIN_COMPLEX                                          | 1.27 | 0.78 | 0 | 0 | 0 | not significant |
| 12431 | GO_PHOSPHORYLASE_KINASE_ACTIVITY                                         | 1.27 | 0.78 | 0 | 0 | 0 | not significant |
| 12432 | SNIDERS_AMPLIFIED_IN_HEAD_AND_NECK_TUMORS                                | 1.27 | 0.78 | 0 | 0 | 0 | not significant |
| 12433 | BOYLAN_MULTIPLE_MYELOMA_C_CLUSTER_DN                                     | 1.27 | 0.77 | 0 | 0 | 0 | not significant |
| 12434 | BIOCARTA_CYTOKINE_PATHWAY                                                | 1.27 | 0.76 | 0 | 0 | 0 | not significant |
| 12435 | GILMORE_CORE_NFKB_PATHWAY                                                | 1.27 | 0.75 | 0 | 0 | 0 | not significant |
| 12436 | GO_PROTEIN_DEGLYCOSYLATION                                               | 1.27 | 0.75 | 0 | 0 | 0 | not significant |
| 12437 | PID_IL3_PATHWAY                                                          | 1.27 | 0.75 | 0 | 0 | 0 | not significant |
| 12438 | BIOCARTA_MONOCYTE_PATHWAY                                                | 1.27 | 0.74 | 0 | 0 | 0 | not significant |
| 12439 | GO_POSITIVE_REGULATION_OF_REGULATORY_T_CELL_DIFFERENTIATION              | 1.27 | 0.73 | 0 | 0 | 0 | not significant |
| 12440 | GO_REGULATION_OF_OVARIAN_FOLLICLE_DEVELOPMENT                            | 1.27 | 0.73 | 0 | 0 | 0 | not significant |
| 12441 | REACTOME_INTERLEUKIN_2_SIGNALING                                         | 1.27 | 0.73 | 0 | 0 | 0 | not significant |
| 12442 | SEMBA_FHIT_TARGETS_UP                                                    | 1.27 | 0.73 | 0 | 0 | 0 | not significant |
| 12443 | VERRECCHIA_RESPONSE_TO_TGFB1_C2                                          | 1.27 | 0.73 | 0 | 0 | 0 | not significant |
| 12444 | BIOCARTA_LYM_PATHWAY                                                     | 1.27 | 0.72 | 0 | 0 | 0 | not significant |
| 12445 | REACTOME_PRESYNAPTIC_DEPOLARIZATION_AND_CALCIIUM_CHANNEL                 | 1.27 | 0.72 | 0 | 0 | 0 | not significant |
| 12446 | SASAKI_TARGETS_OF_TP73_AND_TP63                                          | 1.27 | 0.72 | 0 | 0 | 0 | not significant |
| 12447 | GO ASPARTIC ENDOPEPTIDASE ACTIVITY INTRAMEMBRANE CLEAVING                | 1.27 | 0.71 | 0 | 0 | 0 | not significant |
| 12448 | GO_TRIGLYCERIDE_LIPASE_ACTIVITY                                          | 1.27 | 0.71 | 0 | 0 | 0 | not significant |
| 12449 | GO_INTERLEUKIN_23_MEDIATED_SIGNALING_PATHWAY                             | 1.27 | 0.70 | 0 | 0 | 0 | not significant |
| 12450 | GO_INTRINSIC_COMPONENT_OF_VACUOLAR_MEMBRANE                              | 1.27 | 0.69 | 0 | 0 | 0 | not significant |
| 12451 | GO_NEGATIVE_REGULATION_OF_NEUROTRANSMITTER_SECRETION                     | 1.27 | 0.67 | 0 | 0 | 0 | not significant |
| 12452 | GO_ADAPTIVE_IMMUNE_RESPONSE                                              | 1.28 | 1.33 | 0 | 0 | 0 | not significant |
| 12453 | GAUSSMANN_MLL_AF4_FUSION_TARGETS_F_UP                                    | 1.28 | 1.07 | 0 | 0 | 0 | not significant |
| 12454 | GO_POSITIVE_REGULATION_OF_PEPTIDYL_TYROSINE_PHOSPHORYLATION              | 1.28 | 0.92 | 0 | 0 | 0 | not significant |
| 12455 | BILANGES_SERUM_SENSITIVE_GENES                                           | 1.28 | 0.90 | 0 | 0 | 0 | not significant |
| 12456 | GO_POSITIVE_REGULATION_OF_SMALL_GTPASE_MEDIATED_SIGNALING                | 1.28 | 0.89 | 0 | 0 | 0 | not significant |
| 12457 | GO_REGULATION_OF_CELL_KILLING                                            | 1.28 | 0.89 | 0 | 0 | 0 | not significant |
| 12458 | GO_PHAGOPHORE_ASSEMBLY_SITE                                              | 1.28 | 0.88 | 0 | 0 | 0 | not significant |
| 12459 | REACTOME_NCAM_SIGNALING_FOR_NEURITE_OUT_GROWTH                           | 1.28 | 0.88 | 0 | 0 | 0 | not significant |
| 12460 | GO_REGULATION_OF_DEFENSE_RESPONSE_TO_VIRUS_BY_HOST                       | 1.28 | 0.80 | 0 | 0 | 0 | not significant |
| 12461 | GO_PROTON_TRANSPORTING_V_TYPE_ATPASE_V0_DOMAIN                           | 1.28 | 0.78 | 0 | 0 | 0 | not significant |
| 12462 | HOLLEMAN_DAUNORUBICIN_B_ALL_DN                                           | 1.28 | 0.78 | 0 | 0 | 0 | not significant |
| 12463 | GO_SODIUM_CHANNEL_COMPLEX                                                | 1.28 | 0.77 | 0 | 0 | 0 | not significant |
| 12464 | GO_HISTONE_H3_K27_METHYLATION                                            | 1.28 | 0.76 | 0 | 0 | 0 | not significant |
| 12465 | TIAN_TNF_SIGNALING_VIA_NFKB                                              | 1.28 | 0.76 | 0 | 0 | 0 | not significant |
| 12466 | GO_HYPOTHALAMUS_DEVELOPMENT                                              | 1.28 | 0.75 | 0 | 0 | 0 | not significant |
| 12467 | GO_NEGATIVE_REGULATION_OF_CELL_KILLING                                   | 1.28 | 0.75 | 0 | 0 | 0 | not significant |
| 12468 | GO_REGULATION_OF_INOSITOL_PHOSPHATE_BIOSYNTHETIC_PROCESS                 | 1.28 | 0.75 | 0 | 0 | 0 | not significant |
| 12469 | CHR2Q34                                                                  | 1.28 | 0.74 | 0 | 0 | 0 | not significant |
| 12470 | GO_PHOSPHATE_ION_BINDING                                                 | 1.28 | 0.74 | 0 | 0 | 0 | not significant |
| 12471 | GO_SPHINGOID_BIOSYNTHETIC_PROCESS                                        | 1.28 | 0.74 | 0 | 0 | 0 | not significant |
| 12472 | GO GRANULOCYTE MACROPHAGE COLONY STIMULATING FACTOR PATHWAY              | 1.28 | 0.73 | 0 | 0 | 0 | not significant |
| 12473 | GO_NEGATIVE_REGULATION_OF_LIPID_CATABOLIC_PROCESS                        | 1.28 | 0.73 | 0 | 0 | 0 | not significant |
| 12474 | GO_NEGATIVE_REGULATION_OF_NATURAL_KILLER_CELL_MEDIATED_IMMUNITY          | 1.28 | 0.73 | 0 | 0 | 0 | not significant |
| 12475 | GO_SODIUM_CHANNEL_ACTIVITY                                               | 1.28 | 0.73 | 0 | 0 | 0 | not significant |
| 12476 | GO_SENSORIAL_PERCEPTION_OF_SMELL                                         | 1.28 | 0.72 | 0 | 0 | 0 | not significant |
| 12477 | REACTOME_ASSEMBLY_OF_ACTIVE_LPL_AND_LIPC_LIPASE_COMPLEXES                | 1.28 | 0.72 | 0 | 0 | 0 | not significant |
| 12478 | CONRAD_GERMLINE_STEM_CELL                                                | 1.28 | 0.71 | 0 | 0 | 0 | not significant |
| 12479 | YAO_HOXA10_TARGETS_VIA_PROGESTERONE_DN                                   | 1.28 | 0.71 | 0 | 0 | 0 | not significant |
| 12480 | CASTELLANO_HRAS_AND_NRAS_TARGETS_DN                                      | 1.28 | 0.69 | 0 | 0 | 0 | not significant |
| 12481 | GO_POTASSIUM_ION_LEAK_CHANNEL_ACTIVITY                                   | 1.28 | 0.69 | 0 | 0 | 0 | not significant |
| 12482 | THILLAINADESAN_ZNF217_TARGETS_DN                                         | 1.28 | 0.68 | 0 | 0 | 0 | not significant |
| 12483 | GO_CELL_FATE_COMMITMENT                                                  | 1.29 | 1.11 | 0 | 0 | 0 | not significant |
| 12484 | KRAS.600.LUNG.BREAST.UP.V1.UP                                            | 1.29 | 1.07 | 0 | 0 | 0 | not significant |
| 12485 | RICKMAN_TUMOR_DIFFERENTIATED_WELL_VS_MODERATELY_UP                       | 1.29 | 1.07 | 0 | 0 | 0 | not significant |
| 12486 | KRAS.600.LUNG.BREAST.UP.V1.DN                                            | 1.29 | 1.04 | 0 | 0 | 0 | not significant |
| 12487 | GO_ENDOTHELIUM_DEVELOPMENT                                               | 1.29 | 1.01 | 0 | 0 | 0 | not significant |
| 12488 | KIM_MYC_AMPLIFICATION_TARGETS_DN                                         | 1.29 | 0.96 | 0 | 0 | 0 | not significant |
| 12489 | CHR7Q21                                                                  | 1.29 | 0.95 | 0 | 0 | 0 | not significant |
| 12490 | GO_AMINOGLYCAN_METABOLIC_PROCESS                                         | 1.29 | 0.95 | 0 | 0 | 0 | not significant |
| 12491 | AMIT_SERUM_RESPONSE_60_MCF10A                                            | 1.29 | 0.94 | 0 | 0 | 0 | not significant |
| 12492 | GO_POLYSOME                                                              | 1.29 | 0.94 | 0 | 0 | 0 | not significant |
| 12493 | JECHLINGER_EPITHELIAL_TO_MESENCHYMAL_TRANSITION_UP                       | 1.29 | 0.91 | 0 | 0 | 0 | not significant |
| 12494 | GO_REGULATION_OF_RECEPTOR_SIGNALING_PATHWAY_VIA_STAT                     | 1.29 | 0.90 | 0 | 0 | 0 | not significant |
| 12495 | REACTOME_CD28_DEPENDENT_PI3K_AKT_SIGNALING                               | 1.29 | 0.88 | 0 | 0 | 0 | not significant |
| 12496 | CAHOY_NEURONAL                                                           | 1.29 | 0.85 | 0 | 0 | 0 | not significant |
| 12497 | GO_MESENCHYMAL_CELL_PROLIFERATION                                        | 1.29 | 0.85 | 0 | 0 | 0 | not significant |
| 12498 | GO_POSITIVE_REGULATION_OF_INTERLEUKIN_8_PRODUCTION                       | 1.29 | 0.85 | 0 | 0 | 0 | not significant |
| 12499 | HOFFMANN_IMMATURE_TO_MATURE_B_LYMPHOCYTE_UP                              | 1.29 | 0.84 | 0 | 0 | 0 | not significant |
| 12500 | GO_MITOPHAGY                                                             | 1.29 | 0.83 | 0 | 0 | 0 | not significant |
| 12501 | CHR9P22                                                                  | 1.29 | 0.81 | 0 | 0 | 0 | not significant |
| 12502 | GO_LENS_FIBER_CELL_DIFFERENTIATION                                       | 1.29 | 0.81 | 0 | 0 | 0 | not significant |
| 12503 | GO_MICROTUBULE_NUCLEATION_BY_MICROTUBULE_ORGANIZING_CENTER               | 1.29 | 0.81 | 0 | 0 | 0 | not significant |
| 12504 | ISHIKAWA_STING_SIGNALING                                                 | 1.29 | 0.81 | 0 | 0 | 0 | not significant |
| 12505 | GO_NEGATIVE_REGULATION_OF_NIK_NF_KAPPA_B_SIGNALING                       | 1.29 | 0.80 | 0 | 0 | 0 | not significant |
| 12506 | GO_RECEPTOR_SIGNALING_COMPLEX_SCAFFOLD_ACTIVITY                          | 1.29 | 0.80 | 0 | 0 | 0 | not significant |
| 12507 | HOLLEMAN_ASPARAGINASE_RESISTANCE_ALL_UP                                  | 1.29 | 0.80 | 0 | 0 | 0 | not significant |
| 12508 | RASHI_NFKB1_TARGETS                                                      | 1.29 | 0.79 | 0 | 0 | 0 | not significant |
| 12509 | GO_NATURAL_KILLER_CELL_DIFFERENTIATION                                   | 1.29 | 0.78 | 0 | 0 | 0 | not significant |
| 12510 | GO_NUCLEOTIDE_BINDING_OLIGOMERIZATION_DOMAIN_CONTAINING_2_FAMILY_MEMBERS | 1.29 | 0.78 | 0 | 0 | 0 | not significant |
| 12511 | GO_SOMATIC_STEM_CELL_DIVISION                                            | 1.29 | 0.78 | 0 | 0 | 0 | not significant |
| 12512 | GO_WNT_PROTEIN_BINDING                                                   | 1.29 | 0.78 | 0 | 0 | 0 | not significant |
| 12513 | GO_PROTEIN_BINDING_BRIDGING_INVOLVED_IN_SUBSTRATE_RECOGNITION            | 1.29 | 0.77 | 0 | 0 | 0 | not significant |
| 12514 | GO_VOLTAGE_GATED_CALCIIUM_CHANNEL_COMPLEX                                | 1.29 | 0.77 | 0 | 0 | 0 | not significant |
| 12515 | ZIRN_TRETINOIN_RESPONSE_WT1_UP                                           | 1.29 | 0.77 | 0 | 0 | 0 | not significant |
| 12516 | GARGALOVIC_RESPONSE_TO_OXIDIZED_PHOSPHOLIPIDS_LIGHTYELLOW                | 1.29 | 0.76 | 0 | 0 | 0 | not significant |
| 12517 | GO_BASIC_AMINO_ACID_TRANSMEMBRANE_TRANSPORT                              | 1.29 | 0.76 | 0 | 0 | 0 | not significant |
| 12518 | GO_INHIBITORY_SYNAPSE                                                    | 1.29 | 0.76 | 0 | 0 | 0 | not significant |
| 12519 | GO_NEGATIVE_REGULATION_OF_ACTIN_FILAMENT_BUNDLE_ASSEMBLY                 | 1.29 | 0.75 | 0 | 0 | 0 | not significant |
| 12520 | BIOCARTA_TCYTOTOXIC_PATHWAY                                              | 1.29 | 0.74 | 0 | 0 | 0 | not significant |
| 12521 | GO_ALPHA_CATENIN_BINDING                                                 | 1.29 | 0.74 | 0 | 0 | 0 | not significant |
| 12522 | GO_DIACYLGLYCEROL_METABOLIC_PROCESS                                      | 1.29 | 0.74 | 0 | 0 | 0 | not significant |
| 12523 | GO_HISTONE_H3_K14_ACETYLATION                                            | 1.29 | 0.74 | 0 | 0 | 0 | not significant |

|       |                                                           |      |      |   |   |   |                 |
|-------|-----------------------------------------------------------|------|------|---|---|---|-----------------|
| 12524 | GO_REGULATION_OF_HEAT_GENERATION                          | 1.29 | 0.74 | 0 | 0 | 0 | not significant |
| 12525 | REACTOME_INTERACTION_BETWEEN_L1_AND_ANKYRINS              | 1.29 | 0.74 | 0 | 0 | 0 | not significant |
| 12526 | GO_GAP_JUNCTION                                           | 1.29 | 0.73 | 0 | 0 | 0 | not significant |
| 12527 | CHR5P12                                                   | 1.29 | 0.72 | 0 | 0 | 0 | not significant |
| 12528 | KIM_ALL_DISORDERS_DURATION_CORR_UP                        | 1.29 | 0.72 | 0 | 0 | 0 | not significant |
| 12529 | REACTOME_NEGATIVE_REGULATION_OF_ACTIVITY_OF_TFAP2_AP_2_F4 | 1.29 | 0.72 | 0 | 0 | 0 | not significant |
| 12530 | LEI_HOXC8_TARGETS_UP                                      | 1.29 | 0.70 | 0 | 0 | 0 | not significant |
| 12531 | BENPORATH_ES_WITH_H3K27ME3                                | 1.30 | 1.53 | 0 | 0 | 0 | not significant |
| 12532 | GO_ADAPTIVE_IMMUNE_RESPONSE_BASED_ON_SOMATIC_RECOMBINAT   | 1.30 | 1.23 | 0 | 0 | 0 | not significant |
| 12533 | KEGG_LYSOSOME                                             | 1.30 | 1.15 | 0 | 0 | 0 | not significant |
| 12534 | MTOR_UP_V1_DN                                             | 1.30 | 1.15 | 0 | 0 | 0 | not significant |
| 12535 | NABA_SECRETED_FACTORS                                     | 1.30 | 1.09 | 0 | 0 | 0 | not significant |
| 12536 | GO_LYMPHOCYTE_ACTIVATION_INVOLVED_IN_IMMUNE_RESPONSE      | 1.30 | 1.08 | 0 | 0 | 0 | not significant |
| 12537 | GO_B_CELL_DIFFERENTIATION                                 | 1.30 | 1.04 | 0 | 0 | 0 | not significant |
| 12538 | SARRIO_EPITHELIAL_MESENCHYMAL_TRANSITION_DN               | 1.30 | 1.03 | 0 | 0 | 0 | not significant |
| 12539 | DACOSTA_UV_RESPONSE_VIA_ERCC3_COMMON_UP                   | 1.30 | 1.01 | 0 | 0 | 0 | not significant |
| 12540 | KIM_GERMINAL_CENTER_T_HELPER_UP                           | 1.30 | 0.98 | 0 | 0 | 0 | not significant |
| 12541 | GO_LENS_DEVELOPMENT_IN_CAMERA_TYPE_EYE                    | 1.30 | 0.94 | 0 | 0 | 0 | not significant |
| 12542 | ZHAN_MULTIPLE_MYELOMA_HP_UP                               | 1.30 | 0.93 | 0 | 0 | 0 | not significant |
| 12543 | GO_ENDODEOXYRIBONUCLEASE_ACTIVITY                         | 1.30 | 0.90 | 0 | 0 | 0 | not significant |
| 12544 | SUNG_METASTASIS_STROMA_DN                                 | 1.30 | 0.90 | 0 | 0 | 0 | not significant |
| 12545 | GO_TRANSMEMBRANE_RECEPTOR_PROTEIN_KINASE_ACTIVITY         | 1.30 | 0.88 | 0 | 0 | 0 | not significant |
| 12546 | CHR7Q34                                                   | 1.30 | 0.86 | 0 | 0 | 0 | not significant |
| 12547 | CHR10Q21                                                  | 1.30 | 0.85 | 0 | 0 | 0 | not significant |
| 12548 | CHR6Q22                                                   | 1.30 | 0.85 | 0 | 0 | 0 | not significant |
| 12549 | GO_INTRINSIC_COMPONENT_OF_PRESYNAPTIC_MEMBRANE            | 1.30 | 0.83 | 0 | 0 | 0 | not significant |
| 12550 | HEIDENBLAD_AMPLICON_12P11_12_DN                           | 1.30 | 0.83 | 0 | 0 | 0 | not significant |
| 12551 | PID_DNA_PK_PATHWAY                                        | 1.30 | 0.83 | 0 | 0 | 0 | not significant |
| 12552 | GO_GLUTAMINE_METABOLIC_PROCESS                            | 1.30 | 0.82 | 0 | 0 | 0 | not significant |
| 12553 | GO_NEGATIVE_REGULATION_OF_INTERFERON_GAMMA_PRODUCTION     | 1.30 | 0.81 | 0 | 0 | 0 | not significant |
| 12554 | REACTOME_TRANSPORT_OF_NUCLEOSIDES_AND_FREE_PURINE_AND_F   | 1.30 | 0.81 | 0 | 0 | 0 | not significant |
| 12555 | GO_ENDOCARDIAL_CUSHION_MORPHOGENESIS                      | 1.30 | 0.80 | 0 | 0 | 0 | not significant |
| 12556 | GO_INTERMEMBRANE_LIPID_TRANSFER_ACTIVITY                  | 1.30 | 0.79 | 0 | 0 | 0 | not significant |
| 12557 | GO_SECONDARY_PALATE_DEVELOPMENT                           | 1.30 | 0.78 | 0 | 0 | 0 | not significant |
| 12558 | GO_CARDIAC_RIGHT_VENTRICLE_MORPHOGENESIS                  | 1.30 | 0.76 | 0 | 0 | 0 | not significant |
| 12559 | GO_N_ACETYLNURAMINATE_CATABOLIC_PROCESS                   | 1.30 | 0.76 | 0 | 0 | 0 | not significant |
| 12560 | GO_TELOMERE_LOCALIZATION                                  | 1.30 | 0.76 | 0 | 0 | 0 | not significant |
| 12561 | GO_POSITIVE_REGULATION_OF_AMYLOID_BETA_CLEARANCE          | 1.30 | 0.75 | 0 | 0 | 0 | not significant |
| 12562 | KOBAYASHI_EGFR_SIGNALING_6HR_UP                           | 1.30 | 0.75 | 0 | 0 | 0 | not significant |
| 12563 | REACTOME_SIGNALING_BY_NODAL                               | 1.30 | 0.75 | 0 | 0 | 0 | not significant |
| 12564 | CHRXQ25                                                   | 1.30 | 0.74 | 0 | 0 | 0 | not significant |
| 12565 | GO_RESPONSE_TO_INTERLEUKIN_2                              | 1.30 | 0.70 | 0 | 0 | 0 | not significant |
| 12566 | ONKEN_UVEAL_MELANOMA_DN                                   | 1.31 | 1.96 | 0 | 0 | 0 | not significant |
| 12567 | GO_T_CELL_DIFFERENTIATION                                 | 1.31 | 1.43 | 0 | 0 | 0 | not significant |
| 12568 | CASORELLI_ACUTE_PROMYELOCYTIC_LEUKEMIA_UP                 | 1.31 | 1.20 | 0 | 0 | 0 | not significant |
| 12569 | GO_MEIOSIS_I_CELL_CYCLE_PROCESS                           | 1.31 | 1.12 | 0 | 0 | 0 | not significant |
| 12570 | GO_HUMORAL_IMMUNE_RESPONSE                                | 1.31 | 1.11 | 0 | 0 | 0 | not significant |
| 12571 | GO_ROUGH_ENDOPLASMIC_RETICULUM                            | 1.31 | 1.04 | 0 | 0 | 0 | not significant |
| 12572 | CROONQUIST_STROMAL_STIMULATION_UP                         | 1.31 | 0.97 | 0 | 0 | 0 | not significant |
| 12573 | GO_POSITIVE_REGULATION_OF_CARBHYDRATE_METABOLIC_PROCES    | 1.31 | 0.95 | 0 | 0 | 0 | not significant |
| 12574 | KRAS.LUNG.UP.V1.UP                                        | 1.31 | 0.95 | 0 | 0 | 0 | not significant |
| 12575 | LIM_MAMMARY_LUMINAL_MATURE_DN                             | 1.31 | 0.95 | 0 | 0 | 0 | not significant |
| 12576 | GO_MODIFIED_AMINO_ACID_BINDING                            | 1.31 | 0.93 | 0 | 0 | 0 | not significant |
| 12577 | CHR15Q11                                                  | 1.31 | 0.91 | 0 | 0 | 0 | not significant |
| 12578 | REACTOME_PROLACTIN_RECEPTOR_SIGNALING                     | 1.31 | 0.91 | 0 | 0 | 0 | not significant |
| 12579 | GO_TRANSMEMBRANE_RECEPTOR_PROTEIN_TYROSINE_KINASE_ACTIVI  | 1.31 | 0.90 | 0 | 0 | 0 | not significant |
| 12580 | PID_TCTP_PATHWAY                                          | 1.31 | 0.90 | 0 | 0 | 0 | not significant |
| 12581 | GO_POSITIVE_REGULATION_OF_LIPASE_ACTIVITY                 | 1.31 | 0.88 | 0 | 0 | 0 | not significant |
| 12582 | GO_PROTEIN_DEMETHYLATION                                  | 1.31 | 0.88 | 0 | 0 | 0 | not significant |
| 12583 | MCBRYAN_PUBERTAL_TGFB1_TARGETS_DN                         | 1.31 | 0.88 | 0 | 0 | 0 | not significant |
| 12584 | REACTOME_ARACHIDONIC_ACID_METABOLISM                      | 1.31 | 0.87 | 0 | 0 | 0 | not significant |
| 12585 | ZHENG_FOXP3_TARGETS_UP                                    | 1.31 | 0.87 | 0 | 0 | 0 | not significant |
| 12586 | GO_ALPHA_BETA_T_CELL_PROLIFERATION                        | 1.31 | 0.86 | 0 | 0 | 0 | not significant |
| 12587 | GO_ARACHIDONIC_ACID_METABOLIC_PROCESS                     | 1.31 | 0.86 | 0 | 0 | 0 | not significant |
| 12588 | GO_DETERMINATION_OF_DORSAL_VENTRAL_ASYMMETRY              | 1.31 | 0.86 | 0 | 0 | 0 | not significant |
| 12589 | HOQUE_METHYLATED_IN_CANCER                                | 1.31 | 0.86 | 0 | 0 | 0 | not significant |
| 12590 | REACTOME_REGULATION_OF_TP53_ACTIVITY_THROUGH_METHYLATION  | 1.31 | 0.86 | 0 | 0 | 0 | not significant |
| 12591 | BIOCARTA_LYMPHOCYTE_PATHWAY                               | 1.31 | 0.85 | 0 | 0 | 0 | not significant |
| 12592 | GO_CELL_FATE_SPECIFICATION                                | 1.31 | 0.85 | 0 | 0 | 0 | not significant |
| 12593 | GAUSSMANN_MLL_AF4_FUSION_TARGETS_D_DN                     | 1.31 | 0.82 | 0 | 0 | 0 | not significant |
| 12594 | GO_NEGATIVE_REGULATION_OF_AXON_GUIDANCE                   | 1.31 | 0.82 | 0 | 0 | 0 | not significant |
| 12595 | GO_REGULATION_OF_HISTONE_H3_K27_METHYLATION               | 1.31 | 0.82 | 0 | 0 | 0 | not significant |
| 12596 | GO_ARGININE_TRANSPORT                                     | 1.31 | 0.80 | 0 | 0 | 0 | not significant |
| 12597 | GO_POSITIVE_REGULATION_OF_FIBROBLAST_APOPTOTIC_PROCESS    | 1.31 | 0.80 | 0 | 0 | 0 | not significant |
| 12598 | GO_ANTIANTIBIOTIC_TRANSPORT                               | 1.31 | 0.78 | 0 | 0 | 0 | not significant |
| 12599 | GO_ENDOSOME_TO_PLASMA_MEMBRANE_PROTEIN_TRANSPORT          | 1.31 | 0.78 | 0 | 0 | 0 | not significant |
| 12600 | GO_NARROW_PORE_CHANNEL_ACTIVITY                           | 1.31 | 0.77 | 0 | 0 | 0 | not significant |
| 12601 | GO_PROTON_TRANSPORTING_TWO_SECTOR_ATPASE_COMPLEX_PROT     | 1.31 | 0.77 | 0 | 0 | 0 | not significant |
| 12602 | GO_ANCHORED_COMPONENT_OF_SYNAPTIC_VESICLE_MEMBRANE        | 1.31 | 0.76 | 0 | 0 | 0 | not significant |
| 12603 | GO_INTRONIC_TRANSCRIPTION_REGULATORY_REGION_DNA_BINDING   | 1.31 | 0.76 | 0 | 0 | 0 | not significant |
| 12604 | GO_SEQUESTERING_OF_ACTIN_MONOMERS                         | 1.31 | 0.76 | 0 | 0 | 0 | not significant |
| 12605 | GO_POST_ANAL_TAIL_MORPHOGENESIS                           | 1.31 | 0.75 | 0 | 0 | 0 | not significant |
| 12606 | REACTOME_GABA_SYNTHESIS_RELEASE_REUPTAKE_AND_DEGRADATIC   | 1.31 | 0.73 | 0 | 0 | 0 | not significant |
| 12607 | GO_DIPEPTIDASE_ACTIVITY                                   | 1.31 | 0.72 | 0 | 0 | 0 | not significant |
| 12608 | CHR19P13                                                  | 1.32 | 1.94 | 0 | 0 | 0 | not significant |
| 12609 | DURAND_STROMA_S_UP                                        | 1.32 | 1.36 | 0 | 0 | 0 | not significant |
| 12610 | GO_POSTSYNAPTIC_MEMBRANE                                  | 1.32 | 1.27 | 0 | 0 | 0 | not significant |
| 12611 | ZWANG_EGF_INTERVAL_DN                                     | 1.32 | 1.27 | 0 | 0 | 0 | not significant |
| 12612 | TAKEDA_TARGETS_OF_NUP98_HOXA9_FUSION_3D_UP                | 1.32 | 1.18 | 0 | 0 | 0 | not significant |
| 12613 | AFFAR_YY1_TARGETS_UP                                      | 1.32 | 1.14 | 0 | 0 | 0 | not significant |
| 12614 | GO_CILIARY_PLASM                                          | 1.32 | 1.11 | 0 | 0 | 0 | not significant |
| 12615 | GO_SYNAPSE_ASSEMBLY                                       | 1.32 | 1.06 | 0 | 0 | 0 | not significant |
| 12616 | GO_APPENDAGE_MORPHOGENESIS                                | 1.32 | 1.05 | 0 | 0 | 0 | not significant |
| 12617 | GO_GLYCOPROTEIN_METABOLIC_PROCESS                         | 1.32 | 1.04 | 0 | 0 | 0 | not significant |
| 12618 | GO_DORSAL_VENTRAL_PATTERN_FORMATION                       | 1.32 | 1.02 | 0 | 0 | 0 | not significant |
| 12619 | REACTOME_NOD1_2_SIGNALING_PATHWAY                         | 1.32 | 1.00 | 0 | 0 | 0 | not significant |
| 12620 | GO_AMMONIUM_TRANSPORT                                     | 1.32 | 0.97 | 0 | 0 | 0 | not significant |
| 12621 | LIU_TARGETS_OF_VMVB_VS_CMYB_DN                            | 1.32 | 0.96 | 0 | 0 | 0 | not significant |
| 12622 | DORSAM_HOXA9_TARGETS_UP                                   | 1.32 | 0.93 | 0 | 0 | 0 | not significant |
| 12623 | GO_RESPONSE_TO_SORBITOL                                   | 1.32 | 0.93 | 0 | 0 | 0 | not significant |
| 12624 | KUUSELO_PANCREATIC_CANCER_19Q13_AMPLIFICATION             | 1.32 | 0.92 | 0 | 0 | 0 | not significant |
| 12625 | GO_HISTONE_DEMETHYLASE_ACTIVITY                           | 1.32 | 0.89 | 0 | 0 | 0 | not significant |
| 12626 | GO_REGULATION_OF_SYNAPTIC_VESICLE_RECYCLING               | 1.32 | 0.89 | 0 | 0 | 0 | not significant |
| 12627 | GO_CARDIAC_ATRIUM_DEVELOPMENT                             | 1.32 | 0.87 | 0 | 0 | 0 | not significant |
| 12628 | OHM_METHYLATED_IN_ADULT_CANCERS                           | 1.32 | 0.86 | 0 | 0 | 0 | not significant |
| 12629 | PID_IL5_PATHWAY                                           | 1.32 | 0.86 | 0 | 0 | 0 | not significant |
| 12630 | GO_CELL_VOLUME_HOMEOSTASIS                                | 1.32 | 0.85 | 0 | 0 | 0 | not significant |
| 12631 | MUELLER_COMMON_TARGETS_OF_AML_FUSIONS_UP                  | 1.32 | 0.85 | 0 | 0 | 0 | not significant |
| 12632 | TUOMISTO_TUMOR_SUPPRESSION_BY_COL13A1_UP                  | 1.32 | 0.85 | 0 | 0 | 0 | not significant |

|       |                                                               |      |      |   |   |   |                 |
|-------|---------------------------------------------------------------|------|------|---|---|---|-----------------|
| 12633 | GO_COMPLEMENT_ACTIVATION_ALTERNATIVE_PATHWAY                  | 1.32 | 0.83 | 0 | 0 | 0 | not significant |
| 12634 | GO_NEGATIVE_REGULATION_OF_CELLULAR_SENESCENCE                 | 1.32 | 0.83 | 0 | 0 | 0 | not significant |
| 12635 | GO_POSITIVE_REGULATION_OF_NATURAL_KILLER_CELL_DIFFERENTIATION | 1.32 | 0.82 | 0 | 0 | 0 | not significant |
| 12636 | REACTOME_SEMA4D_INDUCED_CELL_MIGRATION_AND_GROWTH_CONE        | 1.32 | 0.82 | 0 | 0 | 0 | not significant |
| 12637 | GO_INTERLEUKIN_13_PRODUCTION                                  | 1.32 | 0.81 | 0 | 0 | 0 | not significant |
| 12638 | GO_MESODERMAL_CELL_FATE_COMMITMENT                            | 1.32 | 0.81 | 0 | 0 | 0 | not significant |
| 12639 | MATZUK_MALE_REPRODUCTION_SERTOLI                              | 1.32 | 0.81 | 0 | 0 | 0 | not significant |
| 12640 | GO_POSITIVE_REGULATION_OF_CD8_POSITIVE_ALPHA_BETA_T_CELL_     | 1.32 | 0.79 | 0 | 0 | 0 | not significant |
| 12641 | GO_LYMPHOCYTE_DIFFERENTIATION                                 | 1.33 | 1.56 | 0 | 0 | 0 | not significant |
| 12642 | ODONNELL_TFRC_TARGETS_UP                                      | 1.33 | 1.49 | 0 | 0 | 0 | not significant |
| 12643 | GO_PATTERN_SPECIFICATION_PROCESS                              | 1.33 | 1.44 | 0 | 0 | 0 | not significant |
| 12644 | GO_ENHANCER_BINDING                                           | 1.33 | 1.30 | 0 | 0 | 0 | not significant |
| 12645 | GO_REGULATION_OF_RHO_PROTEIN_SIGNAL_TRANSDUCTION              | 1.33 | 1.13 | 0 | 0 | 0 | not significant |
| 12646 | GO_CD4_POSITIVE_ALPHA_BETA_T_CELL_ACTIVATION                  | 1.33 | 1.11 | 0 | 0 | 0 | not significant |
| 12647 | KRAS_AMP_LUNG_UP.V1_DN                                        | 1.33 | 1.05 | 0 | 0 | 0 | not significant |
| 12648 | WATTEL_AUTONOMOUS_THYROID_ADENOMA_UP                          | 1.33 | 1.03 | 0 | 0 | 0 | not significant |
| 12649 | REACTOME_SIGNALING_BY_PDGF                                    | 1.33 | 1.01 | 0 | 0 | 0 | not significant |
| 12650 | GO_TYROSINE_PHOSPHORYLATION_OF_STAT_PROTEIN                   | 1.33 | 1.00 | 0 | 0 | 0 | not significant |
| 12651 | BEIER_GLIOMA_STEM_CELL_DN                                     | 1.33 | 0.99 | 0 | 0 | 0 | not significant |
| 12652 | BURTON_ADIPOGENESIS_11                                        | 1.33 | 0.95 | 0 | 0 | 0 | not significant |
| 12653 | GO_MEIOTIC_TELOMERE_CLUSTERING                                | 1.33 | 0.94 | 0 | 0 | 0 | not significant |
| 12654 | GO_REGULATION_OF_HUMORAL_IMMUNE_RESPONSE                      | 1.33 | 0.94 | 0 | 0 | 0 | not significant |
| 12655 | SAKAI_CHRONIC_HEPATITIS_VS_LIVER_CANCER_DN                    | 1.33 | 0.90 | 0 | 0 | 0 | not significant |
| 12656 | GO_NEGATIVE_REGULATION_OF_NATURAL_KILLER_CELL_ACTIVATION      | 1.33 | 0.88 | 0 | 0 | 0 | not significant |
| 12657 | GOBERT_CORE_OLIGODENDROCYTE_DIFFERENTIATION                   | 1.33 | 0.88 | 0 | 0 | 0 | not significant |
| 12658 | GO_LEFT_RIGHT_AXIS_SPECIFICATION                              | 1.33 | 0.87 | 0 | 0 | 0 | not significant |
| 12659 | BUCKANOVICH_T_LYMPHOCYTE_HOMING_ON_TUMOR_UP                   | 1.33 | 0.85 | 0 | 0 | 0 | not significant |
| 12660 | GO_NEURAL_PLATE_MORPHOGENESIS                                 | 1.33 | 0.84 | 0 | 0 | 0 | not significant |
| 12661 | CLIMENT_BREAST_CANCER_COPY_NUMBER_UP                          | 1.33 | 0.82 | 0 | 0 | 0 | not significant |
| 12662 | GO_BRANCHING_INVOLVED_IN_SALIVARY_GLAND_MORPHOGENESIS         | 1.33 | 0.82 | 0 | 0 | 0 | not significant |
| 12663 | IGLESIAS_E2F_TARGETS_DN                                       | 1.33 | 0.79 | 0 | 0 | 0 | not significant |
| 12664 | REACTOME_ACYL_CHAIN_REMODELING_OF_PS                          | 1.33 | 0.79 | 0 | 0 | 0 | not significant |
| 12665 | GO_NEURON_TO_NEURON_SYNAPSE                                   | 1.34 | 1.56 | 0 | 0 | 0 | not significant |
| 12666 | TORCHIA_TARGETS_OF_EWSR1_FLI1_FUSION_UP                       | 1.34 | 1.45 | 0 | 0 | 0 | not significant |
| 12667 | GO_LYSOSOMAL_LUMEN                                            | 1.34 | 1.22 | 0 | 0 | 0 | not significant |
| 12668 | GO_SMALL_RIBOSOMAL_SUBUNIT                                    | 1.34 | 1.14 | 0 | 0 | 0 | not significant |
| 12669 | KANG_IMMORTALIZED_BY_TERT_DN                                  | 1.34 | 1.14 | 0 | 0 | 0 | not significant |
| 12670 | LEF1_UP.V1_DN                                                 | 1.34 | 1.13 | 0 | 0 | 0 | not significant |
| 12671 | GO_MICROTUBULE_BUNDLE_FORMATION                               | 1.34 | 1.06 | 0 | 0 | 0 | not significant |
| 12672 | HOFFMANN_LARGE_TO_SMALL_PRE_BII_LYMPHOCYTE_DN                 | 1.34 | 1.06 | 0 | 0 | 0 | not significant |
| 12673 | GO_CHLORIDE_TRANSPORT                                         | 1.34 | 1.04 | 0 | 0 | 0 | not significant |
| 12674 | GO_MALE_MEIOTIC_NUCLEAR_DIVISION                              | 1.34 | 0.97 | 0 | 0 | 0 | not significant |
| 12675 | NIKOLSKY_BREAST_CANCER_7Q21_Q22_AMPLICON                      | 1.34 | 0.97 | 0 | 0 | 0 | not significant |
| 12676 | GO_BASAL_PART_OF_CELL                                         | 1.34 | 0.96 | 0 | 0 | 0 | not significant |
| 12677 | GO_NEGATIVE_REGULATION_OF_FAT_CELL_DIFFERENTIATION            | 1.34 | 0.95 | 0 | 0 | 0 | not significant |
| 12678 | RODRIGUES_NTN1_AND_DCC_TARGETS                                | 1.34 | 0.94 | 0 | 0 | 0 | not significant |
| 12679 | GO_SYNAPTIC_TRANSMISSION_GABAERGIC                            | 1.34 | 0.93 | 0 | 0 | 0 | not significant |
| 12680 | ZELSTRA_CD44_TARGETS_UP                                       | 1.34 | 0.92 | 0 | 0 | 0 | not significant |
| 12681 | HEDENFALK_BREAST_CANCER_BRACX_UP                              | 1.34 | 0.91 | 0 | 0 | 0 | not significant |
| 12682 | GO_DEATH_RECEPTOR_ACTIVITY                                    | 1.34 | 0.90 | 0 | 0 | 0 | not significant |
| 12683 | GO_IMMUNOLOGICAL_MEMORY_FORMATION_PROCESS                     | 1.34 | 0.90 | 0 | 0 | 0 | not significant |
| 12684 | GO_CELLULAR_RESPONSE_TO_GROWTH_HORMONE_STIMULUS               | 1.34 | 0.89 | 0 | 0 | 0 | not significant |
| 12685 | GO_ARGININE_TRANSMEMBRANE_TRANSPORT                           | 1.34 | 0.88 | 0 | 0 | 0 | not significant |
| 12686 | BUSA_SAM68_TARGETS_UP                                         | 1.34 | 0.86 | 0 | 0 | 0 | not significant |
| 12687 | GO_PHOSPHATIDYL SERINE_ACYL_CHAIN_REMODELING                  | 1.34 | 0.86 | 0 | 0 | 0 | not significant |
| 12688 | STAEGE_EWING_FAMILY_TUMOR                                     | 1.34 | 0.86 | 0 | 0 | 0 | not significant |
| 12689 | VERRECCHIA_DELAYED_RESPONSE_TO_TGFB1                          | 1.34 | 0.86 | 0 | 0 | 0 | not significant |
| 12690 | GO_PARAXIAL_MESODERM_DEVELOPMENT                              | 1.34 | 0.85 | 0 | 0 | 0 | not significant |
| 12691 | DAZARD_UV_RESPONSE_CLUSTER_G24                                | 1.34 | 0.84 | 0 | 0 | 0 | not significant |
| 12692 | GO_PURINERGIC_NUCLEOTIDE_RECEPTOR_SIGNALING_PATHWAY           | 1.34 | 0.84 | 0 | 0 | 0 | not significant |
| 12693 | GO_NEGATIVE_REGULATION_OF_CELL_CYCLE_CHECKPOINT               | 1.34 | 0.83 | 0 | 0 | 0 | not significant |
| 12694 | GO_POSITIVE_REGULATION_OF_INTERLEUKIN_13_PRODUCTION           | 1.34 | 0.83 | 0 | 0 | 0 | not significant |
| 12695 | PID_INTEGRIN5_PATHWAY                                         | 1.34 | 0.83 | 0 | 0 | 0 | not significant |
| 12696 | VERHAAK_AML_WITH_NPM1_MUTATED_DN                              | 1.35 | 1.54 | 0 | 0 | 0 | not significant |
| 12697 | GO_CYTOSOLIC_PART                                             | 1.35 | 1.52 | 0 | 0 | 0 | not significant |
| 12698 | ZWANG_DOWN_BY_2ND_EGF_PULSE                                   | 1.35 | 1.46 | 0 | 0 | 0 | not significant |
| 12699 | GO_ALPHA_BETA_T_CELL_ACTIVATION                               | 1.35 | 1.35 | 0 | 0 | 0 | not significant |
| 12700 | CHC4_RB1_TARGETS_LOW_SERUM                                    | 1.35 | 1.29 | 0 | 0 | 0 | not significant |
| 12701 | PID_IL2_1PATHWAY                                              | 1.35 | 1.13 | 0 | 0 | 0 | not significant |
| 12702 | TONKS_TARGETS_OF_RUNX1_RUNX1T1_FUSION_SUSTAINED_IN_ERYTH      | 1.35 | 1.07 | 0 | 0 | 0 | not significant |
| 12703 | GO_NEGATIVE_REGULATION_OF_SYNAPTIC_TRANSMISSION               | 1.35 | 1.03 | 0 | 0 | 0 | not significant |
| 12704 | GO_CELL_DIFFERENTIATION_IN_SPINAL_CORD                        | 1.35 | 0.99 | 0 | 0 | 0 | not significant |
| 12705 | GO_POSITIVE_T_CELL_SELECTION                                  | 1.35 | 0.99 | 0 | 0 | 0 | not significant |
| 12706 | RICKMAN_HEAD_AND_NECK_CANCER_A                                | 1.35 | 0.98 | 0 | 0 | 0 | not significant |
| 12707 | GO_SENSORY_PERCEPTION_OF_CHEMICAL_STIMULUS                    | 1.35 | 0.95 | 0 | 0 | 0 | not significant |
| 12708 | KAUFFMANN_MELANOMA_RELAPSE_DN                                 | 1.35 | 0.92 | 0 | 0 | 0 | not significant |
| 12709 | GO_FOREBRAIN_NEUROBLAST_DIVISION                              | 1.35 | 0.90 | 0 | 0 | 0 | not significant |
| 12710 | GO_HEME_TRANSPORT                                             | 1.35 | 0.89 | 0 | 0 | 0 | not significant |
| 12711 | REACTOME_P2Y_RECEPTORS                                        | 1.35 | 0.88 | 0 | 0 | 0 | not significant |
| 12712 | GO_COMPLEMENT_BINDING                                         | 1.35 | 0.87 | 0 | 0 | 0 | not significant |
| 12713 | BIOCARTA_IL3_PATHWAY                                          | 1.35 | 0.86 | 0 | 0 | 0 | not significant |
| 12714 | GO_HEAT_GENERATION                                            | 1.35 | 0.86 | 0 | 0 | 0 | not significant |
| 12715 | GO_POSITIVE_REGULATION_OF_RIG_1_SIGNALING_PATHWAY             | 1.35 | 0.86 | 0 | 0 | 0 | not significant |
| 12716 | GO_LENS_FIBER_CELL_DEVELOPMENT                                | 1.35 | 0.85 | 0 | 0 | 0 | not significant |
| 12717 | GO_PROFILIN_BINDING                                           | 1.35 | 0.85 | 0 | 0 | 0 | not significant |
| 12718 | REACTOME_CATION_COUPLED_CHLORIDE_COTRANSPORTERS               | 1.35 | 0.85 | 0 | 0 | 0 | not significant |
| 12719 | GO_CYSTEINE_TYPE_ENDOPEPTIDASE_ACTIVITY_INVOLVED_IN_APOPTC    | 1.35 | 0.84 | 0 | 0 | 0 | not significant |
| 12720 | GO_HISTONE_H4_K12_ACETYLATION                                 | 1.35 | 0.84 | 0 | 0 | 0 | not significant |
| 12721 | GO_POSITIVE_REGULATION_OF_PROTEIN_LOCALIZATION_TO_SYNAPSE     | 1.35 | 0.84 | 0 | 0 | 0 | not significant |
| 12722 | REACTOME_OLFACTORY_SIGNALING_PATHWAY                          | 1.35 | 0.84 | 0 | 0 | 0 | not significant |
| 12723 | GO_ARGININE_TRANSMEMBRANE_TRANSPORTER_ACTIVITY                | 1.35 | 0.82 | 0 | 0 | 0 | not significant |
| 12724 | WEST_ADRENOCORICAL_TUMOR_DN                                   | 1.36 | 1.99 | 0 | 0 | 0 | not significant |
| 12725 | GO_MEMBRANE_LIPID_METABOLIC_PROCESS                           | 1.36 | 1.48 | 0 | 0 | 0 | not significant |
| 12726 | VECCHI_GASTRIC_CANCER_EARLY_DN                                | 1.36 | 1.43 | 0 | 0 | 0 | not significant |
| 12727 | REACTOME_SPHINGOLIPID_METABOLISM                              | 1.36 | 1.38 | 0 | 0 | 0 | not significant |
| 12728 | GO_GOLGI_STACK                                                | 1.36 | 1.34 | 0 | 0 | 0 | not significant |
| 12729 | RODWELL_AGING_KIDNEY_NO_BLOOD_UP                              | 1.36 | 1.30 | 0 | 0 | 0 | not significant |
| 12730 | ALTEMEIER_RESPONSE_TO_LPS_WITH_MECHANICAL_VENTILATION         | 1.36 | 1.20 | 0 | 0 | 0 | not significant |
| 12731 | ATM_DN.V1_DN                                                  | 1.36 | 1.13 | 0 | 0 | 0 | not significant |
| 12732 | GO_NEGATIVE_REGULATION_OF_INNATE_IMMUNE_RESPONSE              | 1.36 | 1.10 | 0 | 0 | 0 | not significant |
| 12733 | GO_POSTSYNAPTIC_SPECIALIZATION_MEMBRANE                       | 1.36 | 1.04 | 0 | 0 | 0 | not significant |
| 12734 | GO_REGULATION_OF_VASOCONSTRICTION                             | 1.36 | 0.99 | 0 | 0 | 0 | not significant |
| 12735 | REACTOME_G1_S_SPECIFIC_TRANSCRIPTION                          | 1.36 | 0.97 | 0 | 0 | 0 | not significant |
| 12736 | IWANAGA_E2F1_TARGETS_INDUCED_BY_SERUM                         | 1.36 | 0.96 | 0 | 0 | 0 | not significant |
| 12737 | GO_CELLULAR_RESPONSE_TO_OXIDISED_LOW_DENSITY_LIPOPROTEIN      | 1.36 | 0.95 | 0 | 0 | 0 | not significant |
| 12738 | TOMLINS_PROSTATE_CANCER_DN                                    | 1.36 | 0.94 | 0 | 0 | 0 | not significant |
| 12739 | GO_SPERM_AXONEME_ASSEMBLY                                     | 1.36 | 0.93 | 0 | 0 | 0 | not significant |
| 12740 | GALI_TP53_TARGETS_APOPTOTIC_UP                                | 1.36 | 0.92 | 0 | 0 | 0 | not significant |
| 12741 | GO_CALCIIUM_DEPENDENT_CELL_CELL_ADHESION_VIA_PLASMA_MEMBF     | 1.36 | 0.92 | 0 | 0 | 0 | not significant |

|       |                                                                          |      |      |   |   |   |                 |
|-------|--------------------------------------------------------------------------|------|------|---|---|---|-----------------|
| 12742 | GO_FOREGUT_MORPHOGENESIS                                                 | 1.36 | 0.91 | 0 | 0 | 0 | not significant |
| 12743 | GO_URETER_DEVELOPMENT                                                    | 1.36 | 0.91 | 0 | 0 | 0 | not significant |
| 12744 | GO_SIGNAL_RECOGNITION_PARTICLE_RECEPTOR_COMPLEX                          | 1.36 | 0.90 | 0 | 0 | 0 | not significant |
| 12745 | REACTOME_RUNX3_REGULATES_BCL2L11_BIM_TRANSCRIPTION                       | 1.36 | 0.89 | 0 | 0 | 0 | not significant |
| 12746 | GO_PROXIMAL_DISTAL_PATTERN_FORMATION                                     | 1.36 | 0.88 | 0 | 0 | 0 | not significant |
| 12747 | REACTOME_WNT_LIGAND_BIOGENESIS_AND_TRAFFICKING                           | 1.36 | 0.88 | 0 | 0 | 0 | not significant |
| 12748 | BIOCARTA_GATA3_PATHWAY                                                   | 1.36 | 0.86 | 0 | 0 | 0 | not significant |
| 12749 | BIOCARTA_BARD1_PATHWAY                                                   | 1.36 | 0.85 | 0 | 0 | 0 | not significant |
| 12750 | GO_NEGATIVE_REGULATION_OF_P38MAPK_CASCADE                                | 1.36 | 0.84 | 0 | 0 | 0 | not significant |
| 12751 | GO_PRESYNAPTIC_MODULATION_OF_CHEMICAL_SYNAPTIC_TRANSMISSION              | 1.36 | 0.83 | 0 | 0 | 0 | not significant |
| 12752 | GO_AUTOPHAGIC_CELL_DEATH                                                 | 1.36 | 0.82 | 0 | 0 | 0 | not significant |
| 12753 | JAAITINEN_HEMATOPOIETIC_STEM_CELL_UP                                     | 1.37 | 1.65 | 0 | 0 | 0 | not significant |
| 12754 | PYEON_CANCER_HEAD_AND_NECK_VS_CERVICAL_UP                                | 1.37 | 1.65 | 0 | 0 | 0 | not significant |
| 12755 | NAKAMURA_ADIPOGENESIS_EARLY_UP                                           | 1.37 | 1.16 | 0 | 0 | 0 | not significant |
| 12756 | TONKS_TARGETS_OF_RUNX1_RUNX1T1_FUSION_MONOCYTE_DN                        | 1.37 | 1.15 | 0 | 0 | 0 | not significant |
| 12757 | CTP_DNV1_UP                                                              | 1.37 | 1.10 | 0 | 0 | 0 | not significant |
| 12758 | GO_POSITIVE_REGULATION_OF_CELLULAR_CARBOHYDRATE_METABOLISM               | 1.37 | 1.06 | 0 | 0 | 0 | not significant |
| 12759 | GO_NEGATIVE_REGULATION_OF_EPITHELIAL_CELL_APOPTOTIC_PROCESS              | 1.37 | 1.03 | 0 | 0 | 0 | not significant |
| 12760 | REACTOME_ACTIVATION_OF_PPARGCIA_PGC_1ALPHA_BY_PHOSPHORYLATION            | 1.37 | 1.03 | 0 | 0 | 0 | not significant |
| 12761 | GO_PHOSPHATE_ION_TRANSPORT                                               | 1.37 | 1.02 | 0 | 0 | 0 | not significant |
| 12762 | GO_EXTRACELLULAR_REGULATION_OF_SIGNAL_TRANSDUCTION                       | 1.37 | 1.00 | 0 | 0 | 0 | not significant |
| 12763 | GO_LAMIN_BINDING                                                         | 1.37 | 0.99 | 0 | 0 | 0 | not significant |
| 12764 | GO_POTASSIUM_ION_HOMEOSTASIS                                             | 1.37 | 0.97 | 0 | 0 | 0 | not significant |
| 12765 | GO_REGULATION_OF_SYNAPTIC_VESICLE_CLUSTERING                             | 1.37 | 0.96 | 0 | 0 | 0 | not significant |
| 12766 | GO_ENDODEOXYRIBONUCLEASE_ACTIVITY_PRODUCING_5_PHOSPHOMONOPHOSPHATE       | 1.37 | 0.95 | 0 | 0 | 0 | not significant |
| 12767 | GO_FORELIMB_MORPHOGENESIS                                                | 1.37 | 0.95 | 0 | 0 | 0 | not significant |
| 12768 | GO_CELLULAR_RESPONSE_TO_ELECTRICAL_STIMULUS                              | 1.37 | 0.94 | 0 | 0 | 0 | not significant |
| 12769 | GO_TRANSFORMING_GROWTH_FACTOR_BETA_RECEPTOR_CYTOPLASMIC_SIGNALING        | 1.37 | 0.93 | 0 | 0 | 0 | not significant |
| 12770 | KIM_GLS2_TARGETS_DN                                                      | 1.37 | 0.93 | 0 | 0 | 0 | not significant |
| 12771 | GO_ALPHA_BETA_T_CELL_LINEAGE_COMMITMENT                                  | 1.37 | 0.91 | 0 | 0 | 0 | not significant |
| 12772 | MEISSNER_NPC_ICP_WITH_H3_UNMETHYLATED                                    | 1.37 | 0.91 | 0 | 0 | 0 | not significant |
| 12773 | SPIELMAN_LYMPHOBLAST_EUROPEAN_VS_ASIAN_2FC_DN                            | 1.37 | 0.89 | 0 | 0 | 0 | not significant |
| 12774 | SHN_B_CELL_LYMPHOMA_CLUSTER_5                                            | 1.37 | 0.88 | 0 | 0 | 0 | not significant |
| 12775 | GOBERT_OLIGODENDROCYTE_DIFFERENTIATION_DN                                | 1.38 | 2.91 | 0 | 0 | 0 | not significant |
| 12776 | BENPORATH_SUZ12_TARGETS                                                  | 1.38 | 2.04 | 0 | 0 | 0 | not significant |
| 12777 | CHR5Q35                                                                  | 1.38 | 1.34 | 0 | 0 | 0 | not significant |
| 12778 | GO_REGULATION_OF_CARBOHYDRATE_BIOSYNTHETIC_PROCESS                       | 1.38 | 1.29 | 0 | 0 | 0 | not significant |
| 12779 | BOYLAN_MULTIPLE_MYELOMA_PCA3_UP                                          | 1.38 | 1.28 | 0 | 0 | 0 | not significant |
| 12780 | LEIN_CEREBELLUM_MARKERS                                                  | 1.38 | 1.15 | 0 | 0 | 0 | not significant |
| 12781 | REACTOME_CONSTITUTIVE_SIGNALING_BY_ABERRANT_PI3K_IN_CANCELS              | 1.38 | 1.13 | 0 | 0 | 0 | not significant |
| 12782 | GO_POTASSIUM_CHLORIDE_SYMPORTER_ACTIVITY                                 | 1.38 | 1.11 | 0 | 0 | 0 | not significant |
| 12783 | GO_PROTEOGLYCAN_BIOSYNTHETIC_PROCESS                                     | 1.38 | 1.06 | 0 | 0 | 0 | not significant |
| 12784 | GO_CELL_DIFFERENTIATION_IN_HINDRAIN                                      | 1.38 | 1.00 | 0 | 0 | 0 | not significant |
| 12785 | GO_POSITIVE_REGULATION_OF_T_HELPER_17_CELL_DIFFERENTIATION               | 1.38 | 0.99 | 0 | 0 | 0 | not significant |
| 12786 | GO_GLYCOLIPID_BINDING                                                    | 1.38 | 0.98 | 0 | 0 | 0 | not significant |
| 12787 | GO_RENAL_VESICLE_DEVELOPMENT                                             | 1.38 | 0.98 | 0 | 0 | 0 | not significant |
| 12788 | CHR2P24                                                                  | 1.38 | 0.97 | 0 | 0 | 0 | not significant |
| 12789 | GO_DNA_REPLICATION_CHECKPOINT                                            | 1.38 | 0.97 | 0 | 0 | 0 | not significant |
| 12790 | GO_OLIGOSACCHARIDE_CATABOLIC_PROCESS                                     | 1.38 | 0.96 | 0 | 0 | 0 | not significant |
| 12791 | GO_POSITIVE_REGULATION_OF_EPITHELIAL_CELL_APOPTOTIC_PROCESS              | 1.38 | 0.96 | 0 | 0 | 0 | not significant |
| 12792 | FOURNIER_ACINAR_DEVELOPMENT_EARLY_DN                                     | 1.38 | 0.95 | 0 | 0 | 0 | not significant |
| 12793 | GO_NEUROTRANSMITTER_RECEPTOR_ACTIVITY                                    | 1.38 | 0.94 | 0 | 0 | 0 | not significant |
| 12794 | REACTOME_SIGNALING_BY_ERYTHROPOIETIN                                     | 1.38 | 0.94 | 0 | 0 | 0 | not significant |
| 12795 | GO_NEURAL_PLATE_PATTERN_SPECIFICATION                                    | 1.38 | 0.93 | 0 | 0 | 0 | not significant |
| 12796 | GO_PHOSPHATIDYLETHANOLAMINE_ACYL_CHAIN_REMODELING                        | 1.38 | 0.92 | 0 | 0 | 0 | not significant |
| 12797 | REACTOME_ACYL_CHAIN_REMODELING_OF_PEPTIDES                               | 1.38 | 0.92 | 0 | 0 | 0 | not significant |
| 12798 | HOFMANN_MYELODYSPLASTIC_SYNDROME_HIGH_RISK_UP                            | 1.38 | 0.91 | 0 | 0 | 0 | not significant |
| 12799 | KEGG_GLYCOSPHINGOLIPID_BIOSYNTHESIS_GANGLIOSERIES                        | 1.38 | 0.83 | 0 | 0 | 0 | not significant |
| 12800 | IVANOVA_HEMATOPOIESIS_STEM_CELL_AND_PROGENITOR                           | 1.39 | 2.30 | 0 | 0 | 0 | not significant |
| 12801 | GO_DNA_BINDING_TRANSCRIPTION_REPRESSOR_ACTIVITY_RNA_POLYMERASE           | 1.39 | 1.73 | 0 | 0 | 0 | not significant |
| 12802 | YAUCH_HEDGEHOG_SIGNALING_PARACRINE_DN                                    | 1.39 | 1.41 | 0 | 0 | 0 | not significant |
| 12803 | DIAZ_CHRONIC_MEYLOGENOUS_LEUKEMIA_DN                                     | 1.39 | 1.33 | 0 | 0 | 0 | not significant |
| 12804 | MORI_PRE_B_LYMPHOCTE_DN                                                  | 1.39 | 1.33 | 0 | 0 | 0 | not significant |
| 12805 | GO_METHYLATED_HISTONE_BINDING                                            | 1.39 | 1.22 | 0 | 0 | 0 | not significant |
| 12806 | IL21_UP.V1_DN                                                            | 1.39 | 1.22 | 0 | 0 | 0 | not significant |
| 12807 | GO_REGULATION_OF_NEURON_PROJECTION_ARBORIZATION                          | 1.39 | 1.20 | 0 | 0 | 0 | not significant |
| 12808 | GO_CHROMOSOME_ORGANIZATION_INVOLVED_IN_MEIOTIC_CELL_CYCLE                | 1.39 | 1.18 | 0 | 0 | 0 | not significant |
| 12809 | GO_HETEROZYOTIC_CELL_CELL_ADHESION                                       | 1.39 | 1.18 | 0 | 0 | 0 | not significant |
| 12810 | REACTOME_SIGNALING_BY_SCF_KIT                                            | 1.39 | 1.12 | 0 | 0 | 0 | not significant |
| 12811 | GO_NUCLEAR_MIGRATION                                                     | 1.39 | 1.08 | 0 | 0 | 0 | not significant |
| 12812 | GO_GOLGI_CIS_CISTERNA                                                    | 1.39 | 1.07 | 0 | 0 | 0 | not significant |
| 12813 | GO_METANEPHRIC_RENAL_VESICLE_MORPHOGENESIS                               | 1.39 | 1.06 | 0 | 0 | 0 | not significant |
| 12814 | GO_CYTOPLASMIC_SIDE_OF_ENDOPLASMIC_RETICULUM_MEMBRANE                    | 1.39 | 1.05 | 0 | 0 | 0 | not significant |
| 12815 | GO_TRANSMITTER_GATED_CHANNEL_ACTIVITY                                    | 1.39 | 1.05 | 0 | 0 | 0 | not significant |
| 12816 | BIOCARTA_NOS1_PATHWAY                                                    | 1.39 | 1.04 | 0 | 0 | 0 | not significant |
| 12817 | GO_NEGATIVE_REGULATION_OF_ADAPTIVE_IMMUNE_RESPONSE                       | 1.39 | 1.04 | 0 | 0 | 0 | not significant |
| 12818 | CHO_NR4A1_TARGETS                                                        | 1.39 | 1.03 | 0 | 0 | 0 | not significant |
| 12819 | GO_T_HELPER_17_CELL_LINEAGE_COMMITMENT                                   | 1.39 | 1.01 | 0 | 0 | 0 | not significant |
| 12820 | GO_LIPID_ANTIEN_BINDING                                                  | 1.39 | 1.00 | 0 | 0 | 0 | not significant |
| 12821 | REACTOME_PL3K_CASCADE_FGFR1                                              | 1.39 | 0.99 | 0 | 0 | 0 | not significant |
| 12822 | VALK_AML_WITH_EV11                                                       | 1.39 | 0.99 | 0 | 0 | 0 | not significant |
| 12823 | BIOCARTA_CD40_PATHWAY                                                    | 1.39 | 0.98 | 0 | 0 | 0 | not significant |
| 12824 | GO_NEURON_PROJECTION_ARBORIZATION                                        | 1.39 | 0.97 | 0 | 0 | 0 | not significant |
| 12825 | REACTOME_INTERLEUKIN_20_FAMILY_SIGNALING                                 | 1.39 | 0.97 | 0 | 0 | 0 | not significant |
| 12826 | MEISSNER_NPC_HCP_WITH_H3K27ME3                                           | 1.39 | 0.96 | 0 | 0 | 0 | not significant |
| 12827 | PID_IL27_PATHWAY                                                         | 1.39 | 0.96 | 0 | 0 | 0 | not significant |
| 12828 | VERRECCHIA_RESPONSE_TO_TGFB1_C5                                          | 1.39 | 0.96 | 0 | 0 | 0 | not significant |
| 12829 | GO_ANTIEN_PROCESSING_AND_PRESENTATION_ENDOGENOUS_LIPID                   | 1.39 | 0.95 | 0 | 0 | 0 | not significant |
| 12830 | GARGALOVIC_RESPONSE_TO_OXIDIZED_PHOSPHOLIPIDS_GREY_UP                    | 1.39 | 0.93 | 0 | 0 | 0 | not significant |
| 12831 | GO_HISTONE_H2A_K119_MONOUBIQUITINATION                                   | 1.39 | 0.92 | 0 | 0 | 0 | not significant |
| 12832 | GO_PROTEIN_TYROSINE_KINASE_ACTIVITY                                      | 1.39 | 1.68 | 0 | 0 | 0 | not significant |
| 12833 | GO_ALPHA_BETA_T_CELL_DIFFERENTIATION                                     | 1.40 | 1.39 | 0 | 0 | 0 | not significant |
| 12834 | GO_RECEPTOR_SIGNALING_PATHWAY_VIA_STAT                                   | 1.40 | 1.39 | 0 | 0 | 0 | not significant |
| 12835 | BARRIER_CANCER_RELAPSE_NORMAL_SAMPLE_DN                                  | 1.40 | 1.20 | 0 | 0 | 0 | not significant |
| 12836 | KEGG_NEUROACTIVE_LIGAND_RECEPTOR_INTERACTION                             | 1.40 | 1.20 | 0 | 0 | 0 | not significant |
| 12837 | GO_NEGATIVE_REGULATION_OF_LEUKOCYTE_MEDIATED_IMMUNITY                    | 1.40 | 1.18 | 0 | 0 | 0 | not significant |
| 12838 | GO_ENDOCARDIAL_CUSHION_FORMATION                                         | 1.40 | 1.14 | 0 | 0 | 0 | not significant |
| 12839 | GO_REGULATION_OF_DOUBLE_STRAND_BREAK_REPAIR_VIA_HOMOLOGOUS_RECOMBINATION | 1.40 | 1.14 | 0 | 0 | 0 | not significant |
| 12840 | POMEROY_MEDULLOBLASTOMA_DESMOPLASIC_VS_CLASSIC_DN                        | 1.40 | 1.14 | 0 | 0 | 0 | not significant |
| 12841 | GO_PROTEIN_RETENTION_IN_GOLGI_APPARATUS                                  | 1.40 | 1.12 | 0 | 0 | 0 | not significant |
| 12842 | GO_CLATHRIN_SCULPTED_VESICLE                                             | 1.40 | 1.10 | 0 | 0 | 0 | not significant |
| 12843 | GO_SYNAPTIC_VESICLE_CLUSTERING                                           | 1.40 | 1.10 | 0 | 0 | 0 | not significant |
| 12844 | VISALA_RESPONSE_TO_HEAT_SHOCK_AND_AGING_UP                               | 1.40 | 1.09 | 0 | 0 | 0 | not significant |
| 12845 | GO_DIENCEPHALON_DEVELOPMENT                                              | 1.40 | 1.08 | 0 | 0 | 0 | not significant |
| 12846 | MEDINA_SMARCA4_TARGETS                                                   | 1.40 | 1.08 | 0 | 0 | 0 | not significant |
| 12847 | GO_REGULATION_OF_CD40_SIGNALING_PATHWAY                                  | 1.40 | 1.07 | 0 | 0 | 0 | not significant |
| 12848 | GO_T_CELL_LINEAGE_COMMITMENT                                             | 1.40 | 1.07 | 0 | 0 | 0 | not significant |
| 12849 | REACTOME_CELL_CELL_JUNCTION_ORGANIZATION                                 | 1.40 | 1.07 | 0 | 0 | 0 | not significant |
| 12850 | GO_ALPHA_TUBULIN_BINDING                                                 | 1.40 | 1.06 | 0 | 0 | 0 | not significant |

|       |                                                             |      |      |   |   |   |                 |
|-------|-------------------------------------------------------------|------|------|---|---|---|-----------------|
| 12851 | GO_TOOTH_MINERALIZATION                                     | 1.40 | 1.04 | 0 | 0 | 0 | not significant |
| 12852 | REACTOME_TNF_RECEPTOR_SUPERFAMILY_TNFSF_MEMBERS_MEDIAT      | 1.40 | 1.04 | 0 | 0 | 0 | not significant |
| 12853 | GO_NEPHRON_TUBULE_FORMATION                                 | 1.40 | 1.03 | 0 | 0 | 0 | not significant |
| 12854 | GO_CO_SMAD_BINDING                                          | 1.40 | 1.02 | 0 | 0 | 0 | not significant |
| 12855 | MARIADASON_RESPONSE_TO_BUTYRATE_CURCUMIN_SULINDAC_TSA_1     | 1.40 | 1.02 | 0 | 0 | 0 | not significant |
| 12856 | GO_EPIDERMIS_MORPHOGENESIS                                  | 1.40 | 1.01 | 0 | 0 | 0 | not significant |
| 12857 | GO_PROTEIN_LOCALIZATION_TO_PHAGOPHORE_ASSEMBLY_SITE         | 1.40 | 1.01 | 0 | 0 | 0 | not significant |
| 12858 | GO_INTEGRAL_COMPONENT_OF_CYTOPLASMIC_SIDE_OF_ENDOPLASMI     | 1.40 | 1.00 | 0 | 0 | 0 | not significant |
| 12859 | GARGALOVIC_RESPONSE_TO_OXIDIZED_PHOSPHOLIPIDS_PURPLE_DN     | 1.40 | 0.99 | 0 | 0 | 0 | not significant |
| 12860 | CASORELLI_APL_SECONDARY_VS_DE_NOVO_DN                       | 1.40 | 0.98 | 0 | 0 | 0 | not significant |
| 12861 | CHR1P33                                                     | 1.40 | 0.96 | 0 | 0 | 0 | not significant |
| 12862 | GO_PHOSPHOLIPASE_A2_ACTIVITY_CONSUMING_1_2_DIPALMITOYLPHO:  | 1.40 | 0.95 | 0 | 0 | 0 | not significant |
| 12863 | GO_DNA_STRAND_RENATURATION                                  | 1.40 | 0.94 | 0 | 0 | 0 | not significant |
| 12864 | GO_PYRIMIDINE_NUCLEOTIDE_METABOLIC_PROCESS                  | 1.40 | 0.93 | 0 | 0 | 0 | not significant |
| 12865 | GO_AUDITORY_RECEPTOR_CELL_DEVELOPMENT                       | 1.40 | 0.89 | 0 | 0 | 0 | not significant |
| 12866 | PEREZ_TP53_TARGETS                                          | 1.41 | 2.90 | 0 | 0 | 0 | not significant |
| 12867 | GO_VASCULOGENESIS                                           | 1.41 | 1.43 | 0 | 0 | 0 | not significant |
| 12868 | IWANAGA_CARCIINOGENESIS_BY_KRAS_DN                          | 1.41 | 1.40 | 0 | 0 | 0 | not significant |
| 12869 | GO_NUCLEAR_INNER_MEMBRANE                                   | 1.41 | 1.25 | 0 | 0 | 0 | not significant |
| 12870 | CHR15Q21                                                    | 1.41 | 1.20 | 0 | 0 | 0 | not significant |
| 12871 | BANDRES_RESPONSE_TO_CARMUSTIN_WITHOUT_MGMT_48HR_UP          | 1.41 | 1.17 | 0 | 0 | 0 | not significant |
| 12872 | GO_ICOSANOID_METABOLIC_PROCESS                              | 1.41 | 1.17 | 0 | 0 | 0 | not significant |
| 12873 | GO_REGULATION_OF_EPITHELIAL_CELL_APOPTOTIC_PROCESS          | 1.41 | 1.14 | 0 | 0 | 0 | not significant |
| 12874 | REACTOME_ADHERENS_JUNCTIONS_INTERACTIONS                    | 1.41 | 1.12 | 0 | 0 | 0 | not significant |
| 12875 | REACTOME_INTERLEUKIN_2_FAMILY_SIGNALING                     | 1.41 | 1.10 | 0 | 0 | 0 | not significant |
| 12876 | REACTOME_ONCOGENE_INDUCED_SENESCENCE                        | 1.41 | 1.10 | 0 | 0 | 0 | not significant |
| 12877 | GO_HISTONE_ACETYLTRANSFERASE_ACTIVITY_H4_K5_SPECIFIC_       | 1.41 | 1.09 | 0 | 0 | 0 | not significant |
| 12878 | GO_TRANSMISSION_OF_NERVE_IMPULSE                            | 1.41 | 1.09 | 0 | 0 | 0 | not significant |
| 12879 | ABRAHAM_ALPC_VS_MULTIPLE_MYELOMA_UP                         | 1.41 | 1.08 | 0 | 0 | 0 | not significant |
| 12880 | GO_EMBRYONIC_BRAIN_DEVELOPMENT                              | 1.41 | 1.05 | 0 | 0 | 0 | not significant |
| 12881 | REACTOME_SIGNALING_BY_NOTCH1_HD_DOMAIN_MUTANTS_IN_CANCEF    | 1.41 | 1.05 | 0 | 0 | 0 | not significant |
| 12882 | GO_POSITIVE_REGULATION_OF_INTRINSIC_APOPTOTIC_SIGNALING PAT | 1.41 | 1.04 | 0 | 0 | 0 | not significant |
| 12883 | GO_REGULATION_OF_SYNAPTIC_TRANSMISSION_GABAERGIC            | 1.41 | 1.04 | 0 | 0 | 0 | not significant |
| 12884 | GO_ENGLUFMENT_OF_APOPTOTIC_CELL                             | 1.41 | 1.03 | 0 | 0 | 0 | not significant |
| 12885 | GO_REGULATION_OF_METALLOPEPTIDASE_ACTIVITY                  | 1.41 | 1.02 | 0 | 0 | 0 | not significant |
| 12886 | BERENJENO_TRANSFORMED_BY_RHOA_FOREVER_UP                    | 1.41 | 1.01 | 0 | 0 | 0 | not significant |
| 12887 | GO_AMELOGENESIS                                             | 1.41 | 1.01 | 0 | 0 | 0 | not significant |
| 12888 | BIOCARTA_RACC_PATHWAY                                       | 1.41 | 1.00 | 0 | 0 | 0 | not significant |
| 12889 | GO_ACID_AMINO_ACID_LIGASE_ACTIVITY                          | 1.41 | 0.99 | 0 | 0 | 0 | not significant |
| 12890 | GO_ATRIAL_SEPTUM_MORPHOGENESIS                              | 1.41 | 0.97 | 0 | 0 | 0 | not significant |
| 12891 | GO_REGULATION_OF_CD8_POSITIVE_ALPHA_BETA_T_CELL_ACTIVATIO   | 1.41 | 0.96 | 0 | 0 | 0 | not significant |
| 12892 | BIOCARTA_AKAP13_PATHWAY                                     | 1.41 | 0.94 | 0 | 0 | 0 | not significant |
| 12893 | DODD_NASOPHARYNGEAL_CARCIOMA_UP                             | 1.42 | 4.00 | 0 | 0 | 0 | not significant |
| 12894 | TARTE_PLASMA_CELL_VS_PLASMABLAST_UP                         | 1.42 | 2.08 | 0 | 0 | 0 | not significant |
| 12895 | GO_ANATOMICAL_STRUCTURE_MATURATION                          | 1.42 | 1.59 | 0 | 0 | 0 | not significant |
| 12896 | KUNINGER_IGF1_VS_PDGF_TARGETS_UP                            | 1.42 | 1.36 | 0 | 0 | 0 | not significant |
| 12897 | GO_LIPOSACCHARIDE_METABOLIC_PROCESS                         | 1.42 | 1.33 | 0 | 0 | 0 | not significant |
| 12898 | GO_AZUROPHIL_GNANULE_MEMBRANE                               | 1.42 | 1.30 | 0 | 0 | 0 | not significant |
| 12899 | GO_PEPTIDYL_TYROSINE_AUTOPHOSPHORYLATION                    | 1.42 | 1.24 | 0 | 0 | 0 | not significant |
| 12900 | MOREAUX_B_LYMPHOCYTE_MATURATION_BY_TACI_UP                  | 1.42 | 1.24 | 0 | 0 | 0 | not significant |
| 12901 | GO_REGULATION_OF_TRANSCRIPTION_INVOLVED_IN_G1_S_TRANSITION  | 1.42 | 1.21 | 0 | 0 | 0 | not significant |
| 12902 | GO_ACYLGLYCEROL_METABOLIC_PROCESS                           | 1.42 | 1.17 | 0 | 0 | 0 | not significant |
| 12903 | GO_SCHAFFER_COLLATERAL_CA1_SYNAPSE                          | 1.42 | 1.17 | 0 | 0 | 0 | not significant |
| 12904 | GO_ORGANISM_EMERGENCE_FROM_PROTECTIVE_STRUCTURE             | 1.42 | 1.14 | 0 | 0 | 0 | not significant |
| 12905 | GO_MONOCYTE_ACTIVATION                                      | 1.42 | 1.10 | 0 | 0 | 0 | not significant |
| 12906 | GO_REGULATION_OF_CYTOLYSIS                                  | 1.42 | 1.09 | 0 | 0 | 0 | not significant |
| 12907 | KEGG_GLYCOSAMINOGLYCAN_BIOSYNTHESIS_CHONDROITIN_SULFATE     | 1.42 | 1.09 | 0 | 0 | 0 | not significant |
| 12908 | GO_GPI_ANCHOR_BINDING                                       | 1.42 | 1.08 | 0 | 0 | 0 | not significant |
| 12909 | GO_NEGATIVE_REGULATION_OF_ENDOTHELIAL_CELL_APOPTOTIC_PRC    | 1.42 | 1.05 | 0 | 0 | 0 | not significant |
| 12910 | GO_MODULATION_OF_PROGRAMMED_CELL_DEATH_IN_OTHER_ORGANI      | 1.42 | 1.00 | 0 | 0 | 0 | not significant |
| 12911 | GO_RESPONSE_TO_PAIN                                         | 1.42 | 0.96 | 0 | 0 | 0 | not significant |
| 12912 | NAKAMURA_TUMOR_ZONE_PERIPHERAL_VS_CENTRAL_DN                | 1.43 | 2.88 | 0 | 0 | 0 | not significant |
| 12913 | RICKMAN_TUMOR_DIFFERENTIATED_WELL_VS_POORLY_UP              | 1.43 | 2.10 | 0 | 0 | 0 | not significant |
| 12914 | VERHAAK_GLIOMASTOMA_PRONEUR                                 | 1.43 | 1.66 | 0 | 0 | 0 | not significant |
| 12915 | GO_CATION_CHANNEL_COMPLEX                                   | 1.43 | 1.55 | 0 | 0 | 0 | not significant |
| 12916 | BOYLAN_MULTIPLE_MYELOMA_D_DN                                | 1.43 | 1.42 | 0 | 0 | 0 | not significant |
| 12917 | KOBAYASHI_EGFR_SIGNALING_24HR_UP                            | 1.43 | 1.39 | 0 | 0 | 0 | not significant |
| 12918 | SABATES_COLORECTAL_ADENOMA_DN                               | 1.43 | 1.37 | 0 | 0 | 0 | not significant |
| 12919 | GO_REGULATION_OF_NEUROLOGICAL_SYSTEM_PROCESS                | 1.43 | 1.33 | 0 | 0 | 0 | not significant |
| 12920 | GO_T_CELL_DIFFERENTIATION_INVOLVED_IN_IMMUNE_RESPONSE       | 1.43 | 1.33 | 0 | 0 | 0 | not significant |
| 12921 | GO_CD8_POSITIVE_ALPHA_BETA_T_CELL_ACTIVATION                | 1.43 | 1.20 | 0 | 0 | 0 | not significant |
| 12922 | REACTOME_INTERLEUKIN_15_SIGNALING                           | 1.43 | 1.20 | 0 | 0 | 0 | not significant |
| 12923 | GO_MESENCHYME_MORPHOGENESIS                                 | 1.43 | 1.17 | 0 | 0 | 0 | not significant |
| 12924 | GO_REGULATION_OF_NUCLEAR_CELL_CYCLE_DNA_REPLICATION         | 1.43 | 1.17 | 0 | 0 | 0 | not significant |
| 12925 | GO_DELAYED_RECTIFIER_POTASSIUM_CHANNEL_ACTIVITY             | 1.43 | 1.15 | 0 | 0 | 0 | not significant |
| 12926 | GO_POSTSYNAPTIC_SPECIALIZATION_ORGANIZATION                 | 1.43 | 1.11 | 0 | 0 | 0 | not significant |
| 12927 | GO_NITRIC_OXIDE_MEDIATED_SIGNAL_TRANSDUCTION                | 1.43 | 1.10 | 0 | 0 | 0 | not significant |
| 12928 | GO_VACUOLAR_PROTON_TRANSPORTING_V_TYPE_ATPASE_COMPLEX       | 1.43 | 1.10 | 0 | 0 | 0 | not significant |
| 12929 | REACTOME_ACTIVATED_NOTCH1_TRANSMITS_SIGNAL_TO_THE_NUCLEI    | 1.43 | 1.10 | 0 | 0 | 0 | not significant |
| 12930 | GO_CD4_POSITIVE_ALPHA_BETA_T_CELL_LINEAGE_COMMITMENT        | 1.43 | 1.09 | 0 | 0 | 0 | not significant |
| 12931 | GO_VOLUME_SENSITIVE_ANION_CHANNEL_ACTIVITY                  | 1.43 | 1.09 | 0 | 0 | 0 | not significant |
| 12932 | GO_CD40_SIGNALING_PATHWAY                                   | 1.43 | 1.08 | 0 | 0 | 0 | not significant |
| 12933 | GO_REGULATION_OF_SENSORY_PERCEPTION                         | 1.43 | 1.08 | 0 | 0 | 0 | not significant |
| 12934 | GO_LIPEPTIDE_BINDING                                        | 1.43 | 1.07 | 0 | 0 | 0 | not significant |
| 12935 | DAVICIONI_PAX_FOXO1_SIGNATURE_IN_ARMS_DN                    | 1.43 | 1.04 | 0 | 0 | 0 | not significant |
| 12936 | GO_PHOSPHATIDYLSERINE_BINDING                               | 1.43 | 1.04 | 0 | 0 | 0 | not significant |
| 12937 | GO_ISOTYPE_SWITCHING_TO_IGG_ISOTYPES                        | 1.43 | 1.02 | 0 | 0 | 0 | not significant |
| 12938 | THEODOROU_MAMMARY_TUMORIGENESIS                             | 1.43 | 1.00 | 0 | 0 | 0 | not significant |
| 12939 | GO_TRANSPORTER_COMPLEX                                      | 1.44 | 1.84 | 0 | 0 | 0 | not significant |
| 12940 | MIKKELSEN_NPC_HCP_WITH_H3K27ME3                             | 1.44 | 1.52 | 0 | 0 | 0 | not significant |
| 12941 | SIG_CD40PATHWAYMAP                                          | 1.44 | 1.39 | 0 | 0 | 0 | not significant |
| 12942 | MEISSNER_NPC_HCP_WITH_H3K4ME2_AND_H3K27ME3                  | 1.44 | 1.38 | 0 | 0 | 0 | not significant |
| 12943 | GO_POSITIVE_REGULATION_OF_RESPONSE_TO_CYTOKINE_STIMULUS     | 1.44 | 1.31 | 0 | 0 | 0 | not significant |
| 12944 | REACTOME_PROTEIN_PROTEIN_INTERACTIONS_AT_SYNAPSES           | 1.44 | 1.31 | 0 | 0 | 0 | not significant |
| 12945 | GO_REGULATION_OF_ENDOTHELIAL_CELL_DIFFERENTIATION           | 1.44 | 1.30 | 0 | 0 | 0 | not significant |
| 12946 | PID_EPO_PATHWAY                                             | 1.44 | 1.29 | 0 | 0 | 0 | not significant |
| 12947 | GHANDHI_BYSTANDER_IRRADIATION_UP                            | 1.44 | 1.24 | 0 | 0 | 0 | not significant |
| 12948 | REACTOME_POST_TRANSCRIPTIONAL_SILENCING_BY_SMALL_RNAS       | 1.44 | 1.17 | 0 | 0 | 0 | not significant |
| 12949 | GO_CATECHOLAMINE_SECRETION                                  | 1.44 | 1.16 | 0 | 0 | 0 | not significant |
| 12950 | GO_DERMATAN_SULFATE_PROTEOGLYCAN_BIOSYNTHETIC_PROCESS       | 1.44 | 1.16 | 0 | 0 | 0 | not significant |
| 12951 | GO_GLYCOSPHINGOLIPID_BINDING                                | 1.44 | 1.15 | 0 | 0 | 0 | not significant |
| 12952 | GO_EXOCRINE_SYSTEM_DEVELOPMENT                              | 1.44 | 1.14 | 0 | 0 | 0 | not significant |
| 12953 | GO_POSITIVE_REGULATION_OF_INTERLEUKIN_4_PRODUCTION          | 1.44 | 1.14 | 0 | 0 | 0 | not significant |
| 12954 | GO_CYTOPLASMIC_SIDE_OF_ROUGH_ENDOPLASMIC_RETICULUM MEME     | 1.44 | 1.13 | 0 | 0 | 0 | not significant |
| 12955 | MOTAMED_RESPONSE_TO_ANDROGEN_DN                             | 1.44 | 1.13 | 0 | 0 | 0 | not significant |
| 12956 | BIOCARTA_TH1TH2_PATHWAY                                     | 1.44 | 1.12 | 0 | 0 | 0 | not significant |
| 12957 | SCHWAB_TARGETS_OF_BMYB_POLYMORPHIC_VARIANTS_DN              | 1.44 | 1.10 | 0 | 0 | 0 | not significant |
| 12958 | GO_ATP_GATED_ION_CHANNEL_ACTIVITY                           | 1.44 | 1.09 | 0 | 0 | 0 | not significant |
| 12959 | GO_NEURONAL_ACTION_POTENTIAL                                | 1.44 | 1.09 | 0 | 0 | 0 | not significant |



|       |                                                            |      |      |   |   |   |                 |
|-------|------------------------------------------------------------|------|------|---|---|---|-----------------|
| 12960 | REACTOME_N_GLYCAN_ANTENNAE_ELONGATION                      | 1.44 | 1.09 | 0 | 0 | 0 | not significant |
| 12961 | WORSCHER_TUMOR_EVASION_AND_TOLEROGENICITY_UP               | 1.44 | 1.09 | 0 | 0 | 0 | not significant |
| 12962 | TONKS_TARGETS_OF_RUNX1_AND_XI1_FUSION_SUSTAINED_IN_MONOC   | 1.44 | 1.08 | 0 | 0 | 0 | not significant |
| 12963 | HORIUCHI_WTAP_TARGETS_UP                                   | 1.45 | 1.97 | 0 | 0 | 0 | not significant |
| 12964 | ESC_J1_UP_EARLY.V1_UP                                      | 1.45 | 1.75 | 0 | 0 | 0 | not significant |
| 12965 | CHR7Q36                                                    | 1.45 | 1.59 | 0 | 0 | 0 | not significant |
| 12966 | GO_REGULATION_OF_EPITHELIAL_CELL_DIFFERENTIATION           | 1.45 | 1.48 | 0 | 0 | 0 | not significant |
| 12967 | TIEN_INTESTINE_PROBIOTICS_6HR_UP                           | 1.45 | 1.38 | 0 | 0 | 0 | not significant |
| 12968 | GO_ECTODERM_DEVELOPMENT                                    | 1.45 | 1.29 | 0 | 0 | 0 | not significant |
| 12969 | REACTOME_N_GLYCAN_ANTENNAE_ELONGATION_IN_THE_MEDIAL_TRAN   | 1.45 | 1.27 | 0 | 0 | 0 | not significant |
| 12970 | JAZAERI_BREAST_CANCER_BRCA1_VS_BRCA2_DN                    | 1.45 | 1.26 | 0 | 0 | 0 | not significant |
| 12971 | GO_INTRINSIC_COMPONENT_OF_SYNAPTIC_VESICLE_MEMBRANE        | 1.45 | 1.24 | 0 | 0 | 0 | not significant |
| 12972 | REACTOME_CHONDROITIN_SULFATE_DERMATAN_SULFATE_METABOLIS    | 1.45 | 1.22 | 0 | 0 | 0 | not significant |
| 12973 | DELACROIX_RAR_TARGETS_DN                                   | 1.45 | 1.17 | 0 | 0 | 0 | not significant |
| 12974 | GO_INHIBITORY_SYNAPSE_ASSEMBLY                             | 1.45 | 1.16 | 0 | 0 | 0 | not significant |
| 12975 | REACTOME_PI3K_EVENTS_IN_ERBB2_SIGNALING                    | 1.45 | 1.14 | 0 | 0 | 0 | not significant |
| 12976 | GO_CYTOSKELETAL_ANCHORING_AT_NUCLEAR_MEMBRANE              | 1.45 | 1.13 | 0 | 0 | 0 | not significant |
| 12977 | GO_REGULATION_OF_VASCULAR_PERMEABILITY                     | 1.45 | 1.13 | 0 | 0 | 0 | not significant |
| 12978 | PASTURAL_RIZ1_TARGETS_UP                                   | 1.45 | 1.12 | 0 | 0 | 0 | not significant |
| 12979 | GO_RESPONSE_TO_UV_C                                        | 1.45 | 1.11 | 0 | 0 | 0 | not significant |
| 12980 | OSADA_ASCL1_TARGETS_DN                                     | 1.45 | 1.11 | 0 | 0 | 0 | not significant |
| 12981 | GO_REGULATION_OF_AMPA_RECEPTOR_ACTIVITY                    | 1.45 | 1.10 | 0 | 0 | 0 | not significant |
| 12982 | TIAN_BHLHA15_TARGETS                                       | 1.45 | 1.10 | 0 | 0 | 0 | not significant |
| 12983 | GO_PIRNA_METABOLIC_PROCESS                                 | 1.45 | 1.08 | 0 | 0 | 0 | not significant |
| 12984 | KOBAYASHI_RESPONSE_TO_ROMIDEPSIN                           | 1.45 | 1.06 | 0 | 0 | 0 | not significant |
| 12985 | GO_OXIDIZED_DNA_BINDING                                    | 1.45 | 1.00 | 0 | 0 | 0 | not significant |
| 12986 | KRIGE_RESPONSE_TO_TOSEDOSTAT_24HR_UP                       | 1.46 | 4.00 | 0 | 0 | 0 | not significant |
| 12987 | GO_HYDROLASE_ACTIVITY_ACTING_ON_GLYCOSYL_BONDS             | 1.46 | 1.61 | 0 | 0 | 0 | not significant |
| 12988 | GO_NEGATIVE_REGULATION_OF_TYPE_I_INTERFERON_PRODUCTION     | 1.46 | 1.46 | 0 | 0 | 0 | not significant |
| 12989 | GO_RESPONSE_TO_CADMIIUM_ION                                | 1.46 | 1.43 | 0 | 0 | 0 | not significant |
| 12990 | KLEIN_TARGETS_OF_BCR_ABL1_FUSION                           | 1.46 | 1.38 | 0 | 0 | 0 | not significant |
| 12991 | GO_ANNEALING_HELICASE_ACTIVITY                             | 1.46 | 1.37 | 0 | 0 | 0 | not significant |
| 12992 | GO_PCG_PROTEIN_COMPLEX                                     | 1.46 | 1.30 | 0 | 0 | 0 | not significant |
| 12993 | PID_ERBB4_PATHWAY                                          | 1.46 | 1.28 | 0 | 0 | 0 | not significant |
| 12994 | GO_INTERLEUKIN_4_PRODUCTION                                | 1.46 | 1.27 | 0 | 0 | 0 | not significant |
| 12995 | GO_NEGATIVE_REGULATION_OF_CYTOKINE_BIOSYNTHETIC_PROCESS    | 1.46 | 1.26 | 0 | 0 | 0 | not significant |
| 12996 | SAGIV_CD24_TARGETS_DN                                      | 1.46 | 1.25 | 0 | 0 | 0 | not significant |
| 12997 | GO_POSITIVE_REGULATION_OF_T_HELPER_17_TYPE_IMMUNE_RESPON   | 1.46 | 1.23 | 0 | 0 | 0 | not significant |
| 12998 | GAVIN_PDE3B_TARGETS                                        | 1.46 | 1.22 | 0 | 0 | 0 | not significant |
| 12999 | GO_INTERLEUKIN_7_MEDIATED_SIGNALING_PATHWAY                | 1.46 | 1.22 | 0 | 0 | 0 | not significant |
| 13000 | GO_POSITIVE_REGULATION_OF_GLYCOGEN_METABOLIC_PROCESS       | 1.46 | 1.22 | 0 | 0 | 0 | not significant |
| 13001 | MAHADEVAN_RESPONSE_TO_MP470_DN                             | 1.46 | 1.21 | 0 | 0 | 0 | not significant |
| 13002 | GO_CD4_POSITIVE_OR_CD8_POSITIVE_ALPHA_BETA_T_CELL_LINEAGE_ | 1.46 | 1.18 | 0 | 0 | 0 | not significant |
| 13003 | GO_CELLULAR_RESPONSE_TO_SALT                               | 1.46 | 1.17 | 0 | 0 | 0 | not significant |
| 13004 | KEGG_GLYCOSPHINGOLIPID_BIOSYNTHESIS_GLOBO_SERIES           | 1.46 | 1.17 | 0 | 0 | 0 | not significant |
| 13005 | GO_REGULATION_OF_FIBROBLAST_GROWTH_FACTOR_RECEPTOR_SIC     | 1.46 | 1.16 | 0 | 0 | 0 | not significant |
| 13006 | TRAYNOR_RETT_SYNDROM_UP                                    | 1.46 | 1.16 | 0 | 0 | 0 | not significant |
| 13007 | REACTOME_NICOTINAMIDE_SALVAGING                            | 1.46 | 1.15 | 0 | 0 | 0 | not significant |
| 13008 | GO_COCHLEA_MORPHOGENESIS                                   | 1.46 | 1.13 | 0 | 0 | 0 | not significant |
| 13009 | NABA_PROTEOGLYCANS                                         | 1.46 | 1.13 | 0 | 0 | 0 | not significant |
| 13010 | GO_DEVELOPMENTAL_INDUCION                                  | 1.46 | 1.12 | 0 | 0 | 0 | not significant |
| 13011 | GO_NUCLEAR_TRANSCRIBED_MRNA_CATABOLIC_PROCESS              | 1.47 | 2.25 | 0 | 0 | 0 | not significant |
| 13012 | REACTOME_INFLUENZA_INFECTION                               | 1.47 | 1.99 | 0 | 0 | 0 | not significant |
| 13013 | GO_REGULATION_OF_CELLULAR_CARBOHYDRATE_METABOLIC_PROCE     | 1.47 | 1.71 | 0 | 0 | 0 | not significant |
| 13014 | BHAT_ESR1_TARGETS_VIA_AKT1_DN                              | 1.47 | 1.58 | 0 | 0 | 0 | not significant |
| 13015 | FLOTHO_PEDIATRIC_ALL_THERAPY_RESPONSE_UP                   | 1.47 | 1.41 | 0 | 0 | 0 | not significant |
| 13016 | GO_ENAMEL_MINERALIZATION                                   | 1.47 | 1.39 | 0 | 0 | 0 | not significant |
| 13017 | BRCA1_DN.V1_UP                                             | 1.47 | 1.34 | 0 | 0 | 0 | not significant |
| 13018 | GO_CHLORIDE_CHANNEL_COMPLEX                                | 1.47 | 1.33 | 0 | 0 | 0 | not significant |
| 13019 | PID_FGF_PATHWAY                                            | 1.47 | 1.31 | 0 | 0 | 0 | not significant |
| 13020 | GO_REGULATION_OF_NATURAL_KILLER_CELL_DIFFERENTIATION       | 1.47 | 1.30 | 0 | 0 | 0 | not significant |
| 13021 | PID_S1P_META_PATHWAY                                       | 1.47 | 1.29 | 0 | 0 | 0 | not significant |
| 13022 | GO_REGULATION_OF_HEART_RATE_BY_CARDIAC_CONDUCTION          | 1.47 | 1.25 | 0 | 0 | 0 | not significant |
| 13023 | POS_RESPONSE_TO_HISTAMINE_DN                               | 1.47 | 1.25 | 0 | 0 | 0 | not significant |
| 13024 | REACTOME_DOWNSTREAM_SIGNAL_TRANSDUCTION                    | 1.47 | 1.25 | 0 | 0 | 0 | not significant |
| 13025 | GO_POSITIVE_REGULATION_OF_METALLOPEPTIDASE_ACTIVITY        | 1.47 | 1.24 | 0 | 0 | 0 | not significant |
| 13026 | GO_POSITIVE_REGULATION_OF_TRANSFORMING_GROWTH_FACTOR_BI    | 1.47 | 1.22 | 0 | 0 | 0 | not significant |
| 13027 | WONG_ENDMETRIUM_CANCER_DN                                  | 1.47 | 1.20 | 0 | 0 | 0 | not significant |
| 13028 | GO_H3_HISTONE_ACETYLTTRANSFERASE_COMPLEX                   | 1.47 | 1.18 | 0 | 0 | 0 | not significant |
| 13029 | GO_SUBSTRATE_DEPENDENT_CELL_MIGRATION_CELL_EXTENSION       | 1.47 | 1.16 | 0 | 0 | 0 | not significant |
| 13030 | AIGNER_ZEB1_TARGETS                                        | 1.47 | 1.15 | 0 | 0 | 0 | not significant |
| 13031 | GO_POSITIVE_REGULATION_OF_DNA_DEPENDENT_DNA_REPLICATION    | 1.47 | 1.09 | 0 | 0 | 0 | not significant |
| 13032 | GO_INOSITOL_LIPID_MEDIATED_SIGNALING                       | 1.48 | 1.87 | 0 | 0 | 0 | not significant |
| 13033 | KEGG_HEMATOPOIETIC_CELL_LINEAGE                            | 1.48 | 1.48 | 0 | 0 | 0 | not significant |
| 13034 | GO_REGULATION_OF_B_CELL_MEDIATED_IMMUNITY                  | 1.48 | 1.41 | 0 | 0 | 0 | not significant |
| 13035 | NOUZOVA_METHYLATED_IN_APL                                  | 1.48 | 1.39 | 0 | 0 | 0 | not significant |
| 13036 | GO_NSL_COMPLEX                                             | 1.48 | 1.35 | 0 | 0 | 0 | not significant |
| 13037 | GO_REGULATION_OF_HUMORAL_IMMUNE_RESPONSE_MEDIATED_BY_CI    | 1.48 | 1.32 | 0 | 0 | 0 | not significant |
| 13038 | MA_PITUITARY_FETAL_VS_ADULT_UP                             | 1.48 | 1.29 | 0 | 0 | 0 | not significant |
| 13039 | VALK_AML_CLUSTER_4                                         | 1.48 | 1.27 | 0 | 0 | 0 | not significant |
| 13040 | GO_REGULATION_OF_MICROTUBULE_BASED_MOVEMENT                | 1.48 | 1.25 | 0 | 0 | 0 | not significant |
| 13041 | KEGG_OTHER_GLYCAN_DEGRADATION                              | 1.48 | 1.23 | 0 | 0 | 0 | not significant |
| 13042 | CHR6Q13                                                    | 1.48 | 1.22 | 0 | 0 | 0 | not significant |
| 13043 | REACTOME_INTERLEUKIN_21_SIGNALING                          | 1.48 | 1.21 | 0 | 0 | 0 | not significant |
| 13044 | GO_CAMP_BINDING                                            | 1.48 | 1.14 | 0 | 0 | 0 | not significant |
| 13045 | CHANG_CORE_SERUM_RESPONSE_DN                               | 1.49 | 2.15 | 0 | 0 | 0 | not significant |
| 13046 | GO_POSITIVE_REGULATION_OF_EPITHELIAL_CELL_PROLIFERATION    | 1.49 | 1.86 | 0 | 0 | 0 | not significant |
| 13047 | GO_PHOSPHATIDYLINOSITOL_3_KINASE_SIGNALING                 | 1.49 | 1.64 | 0 | 0 | 0 | not significant |
| 13048 | TAKEDA_TARGETS_OF_NUP98_HOX9A9_FUSION_16D_DN               | 1.49 | 1.58 | 0 | 0 | 0 | not significant |
| 13049 | PID_IL4_2PATHWAY                                           | 1.49 | 1.49 | 0 | 0 | 0 | not significant |
| 13050 | CHR5Q22                                                    | 1.49 | 1.45 | 0 | 0 | 0 | not significant |
| 13051 | GO_LONG_TERM_SYNAPTIC_POTENTIATION                         | 1.49 | 1.43 | 0 | 0 | 0 | not significant |
| 13052 | SOTIRIOU_BREAST_CANCER_GRADE_1_VS_3_DN                     | 1.49 | 1.42 | 0 | 0 | 0 | not significant |
| 13053 | GO_REGULATION_OF_INTERLEUKIN_4_PRODUCTION                  | 1.49 | 1.39 | 0 | 0 | 0 | not significant |
| 13054 | REACTOME_GROWTH_HORMONE_RECEPTOR_SIGNALING                 | 1.49 | 1.36 | 0 | 0 | 0 | not significant |
| 13055 | REACTOME_SIGNALING_BY_CYTOSOLIC_FGFR1_FUSION_MUTANTS       | 1.49 | 1.28 | 0 | 0 | 0 | not significant |
| 13056 | GO_POSITIVE_REGULATION_OF_RHO_PROTEIN_SIGNAL_TRANSDUCTION  | 1.49 | 1.27 | 0 | 0 | 0 | not significant |
| 13057 | GO_REGULATION_OF_MESENCHYMAL_CELL_PROLIFERATION            | 1.49 | 1.26 | 0 | 0 | 0 | not significant |
| 13058 | IZUKA_LIVER_CANCER_EARLY_RECURRENCE                        | 1.49 | 1.25 | 0 | 0 | 0 | not significant |
| 13059 | KEGG_SPHINGOLIPID_METABOLISM                               | 1.49 | 1.25 | 0 | 0 | 0 | not significant |
| 13060 | GO_POSITIVE_REGULATION_OF_NATURAL_KILLER_CELL_ACTIVATION   | 1.49 | 1.23 | 0 | 0 | 0 | not significant |
| 13061 | LU_TUMOR_ANGIOGENESIS_UP                                   | 1.49 | 1.22 | 0 | 0 | 0 | not significant |
| 13062 | GO_COBALAMIN_TRANSPORT                                     | 1.49 | 1.21 | 0 | 0 | 0 | not significant |
| 13063 | GO_ANION_CATION_SYMPORTER_ACTIVITY                         | 1.49 | 1.20 | 0 | 0 | 0 | not significant |
| 13064 | GO_DENDRITIC_SPINE_MAINTENANCE                             | 1.49 | 1.20 | 0 | 0 | 0 | not significant |
| 13065 | GO_ESTABLISHMENT_OF_PROTEIN_LOCALIZATION_TO_MEMBRANE       | 1.50 | 2.85 | 0 | 0 | 0 | Enhanced        |
| 13066 | KRAS.600_UP.V1_DN                                          | 1.50 | 2.04 | 0 | 0 | 0 | Enhanced        |
| 13067 | REACTOME_INTERLEUKIN_7_SIGNALING                           | 1.50 | 1.39 | 0 | 0 | 0 | Enhanced        |
| 13068 | REACTOME_CREB3_FACTORS_ACTIVATE_GENES                      | 1.50 | 1.36 | 0 | 0 | 0 | Enhanced        |

|       |                                                            |      |      |   |   |   |          |
|-------|------------------------------------------------------------|------|------|---|---|---|----------|
| 13069 | GO_TOLERANCE_INDUCTION                                     | 1.50 | 1.34 | 0 | 0 | 0 | Enhanced |
| 13070 | SCHRAMM_INHBA_TARGETS_DN                                   | 1.50 | 1.28 | 0 | 0 | 0 | Enhanced |
| 13071 | HOLLEMAN_VINCISTINE_RESISTANCE_B_ALL_DN                    | 1.50 | 1.21 | 0 | 0 | 0 | Enhanced |
| 13072 | REACTOME_NUCLEAR_SIGNALING_BY_ERBB4                        | 1.50 | 1.20 | 0 | 0 | 0 | Enhanced |
| 13073 | GO_GOLGI_CISTERNA                                          | 1.51 | 1.84 | 0 | 0 | 0 | Enhanced |
| 13074 | P53_DN_V2_UP                                               | 1.51 | 1.80 | 0 | 0 | 0 | Enhanced |
| 13075 | GO_POSITIVE_REGULATION_OF_ENDOTHELIAL_CELL_PROLIFERATION   | 1.51 | 1.77 | 0 | 0 | 0 | Enhanced |
| 13076 | GO_SPINAL_CORD_DEVELOPMENT                                 | 1.51 | 1.68 | 0 | 0 | 0 | Enhanced |
| 13077 | GO_LYMPHOCYTE_COSTIMULATION                                | 1.51 | 1.60 | 0 | 0 | 0 | Enhanced |
| 13078 | GO_REGULATION_OF_PLATELET_ACTIVATION                       | 1.51 | 1.50 | 0 | 0 | 0 | Enhanced |
| 13079 | GO_PROTEIN_C_LINKED_GLYCOSYLATION                          | 1.51 | 1.48 | 0 | 0 | 0 | Enhanced |
| 13080 | GO_DOPAMINE_SECRETION                                      | 1.51 | 1.38 | 0 | 0 | 0 | Enhanced |
| 13081 | GO_POSTSYNAPTIC_ENDOSOME                                   | 1.51 | 1.36 | 0 | 0 | 0 | Enhanced |
| 13082 | YAGUE_PRETUMOR_DRUG_RESISTANCE_DN                          | 1.51 | 1.36 | 0 | 0 | 0 | Enhanced |
| 13083 | GO_LATERAL_MESODERM_DEVELOPMENT                            | 1.51 | 1.30 | 0 | 0 | 0 | Enhanced |
| 13084 | GO_ESTROGEN_BIOSYNTHETIC_PROCESS                           | 1.51 | 1.27 | 0 | 0 | 0 | Enhanced |
| 13085 | GO_CATION_CHLORIDE_SYMPORTER_ACTIVITY                      | 1.51 | 1.26 | 0 | 0 | 0 | Enhanced |
| 13086 | GO_NEGATIVE_REGULATION_OF_INTERLEUKIN_10_PRODUCTION        | 1.51 | 1.21 | 0 | 0 | 0 | Enhanced |
| 13087 | GO_NEGATIVE_REGULATION_OF_CYTOKINE_PRODUCTION              | 1.52 | 2.55 | 0 | 0 | 0 | Enhanced |
| 13088 | CHR16P13                                                   | 1.52 | 2.38 | 0 | 0 | 0 | Enhanced |
| 13089 | MARTORIATI_MDM4_TARGETS_NEUROEPITHELIUM_DN                 | 1.52 | 2.10 | 0 | 0 | 0 | Enhanced |
| 13090 | PDGF_UP_V1_DN                                              | 1.52 | 1.83 | 0 | 0 | 0 | Enhanced |
| 13091 | GO_REGULATION_OF_POSTSYNAPTIC_NEUROTRANSMITTER_RECEPTOR    | 1.52 | 1.47 | 0 | 0 | 0 | Enhanced |
| 13092 | LOPES_METHYLATED_IN_COLON_CANCER_UP                        | 1.52 | 1.44 | 0 | 0 | 0 | Enhanced |
| 13093 | MEISSNER_BRAIN_HCP_WITH_H3K4ME2_AND_H3K27ME3               | 1.52 | 1.42 | 0 | 0 | 0 | Enhanced |
| 13094 | BIOCARTA_BLYMPHOCYTE_PATHWAY                               | 1.52 | 1.40 | 0 | 0 | 0 | Enhanced |
| 13095 | GO_REGULATION_OF_NEUROTRANSMITTER_RECEPTOR_ACTIVITY        | 1.52 | 1.39 | 0 | 0 | 0 | Enhanced |
| 13096 | GO_MITOTIC_G2_DNA_DAMAGE_CHECKPOINT                        | 1.52 | 1.33 | 0 | 0 | 0 | Enhanced |
| 13097 | GO_CHLORIDE_ION_HOMEOSTASIS                                | 1.52 | 1.28 | 0 | 0 | 0 | Enhanced |
| 13098 | REACTOME_REGULATION_OF_PTEIN_MRNA_TRANSLATION              | 1.52 | 1.28 | 0 | 0 | 0 | Enhanced |
| 13099 | REACTOME_CREB1_PHOSPHORYLATION_THROUGH_NMDA_RECEPTOR       | 1.52 | 1.27 | 0 | 0 | 0 | Enhanced |
| 13100 | CHRYQ11                                                    | 1.52 | 1.26 | 0 | 0 | 0 | Enhanced |
| 13101 | GERHOLD_RESPONSE_TO_TZD_DN                                 | 1.52 | 1.26 | 0 | 0 | 0 | Enhanced |
| 13102 | NIELSEN_LEIOMYOSARCOMA_DN                                  | 1.52 | 1.26 | 0 | 0 | 0 | Enhanced |
| 13103 | FERRANDO_T_ALL_WITH_MLL_ENL_FUSION_UP                      | 1.53 | 2.11 | 0 | 0 | 0 | Enhanced |
| 13104 | FERREIRA_EWINGS_SARCOMA_UNSTABLE_VS_STABLE_DN              | 1.53 | 1.95 | 0 | 0 | 0 | Enhanced |
| 13105 | PECE_MAMMARY_STEM_CELL_UP                                  | 1.53 | 1.89 | 0 | 0 | 0 | Enhanced |
| 13106 | BAKKER_FOXP3_TARGETS_UP                                    | 1.53 | 1.86 | 0 | 0 | 0 | Enhanced |
| 13107 | CHR3Q27                                                    | 1.53 | 1.64 | 0 | 0 | 0 | Enhanced |
| 13108 | GO_ACTIVATION_OF_JANUS_KINASE_ACTIVITY                     | 1.53 | 1.61 | 0 | 0 | 0 | Enhanced |
| 13109 | GO_NEGATIVE_REGULATION_OF_INTERLEUKIN_6_SECRETION          | 1.53 | 1.60 | 0 | 0 | 0 | Enhanced |
| 13110 | LE_SKI_TARGETS_UP                                          | 1.53 | 1.55 | 0 | 0 | 0 | Enhanced |
| 13111 | ANDERSEN_LIVER_CANCER_KRT19_UP                             | 1.53 | 1.54 | 0 | 0 | 0 | Enhanced |
| 13112 | PHESSIE_TARGETS_OF_APC_AND_MBD2_UP                         | 1.53 | 1.53 | 0 | 0 | 0 | Enhanced |
| 13113 | GO_MITOTIC_G2_M_TRANSITION_CHECKPOINT                      | 1.53 | 1.52 | 0 | 0 | 0 | Enhanced |
| 13114 | GO_IMMUNOLOGICAL_MEMORY_PROCESS                            | 1.53 | 1.51 | 0 | 0 | 0 | Enhanced |
| 13115 | DORSEY_GAB2_TARGETS                                        | 1.53 | 1.44 | 0 | 0 | 0 | Enhanced |
| 13116 | GO_NUCLEUS_LOCALIZATION                                    | 1.53 | 1.41 | 0 | 0 | 0 | Enhanced |
| 13117 | GO_REGULATION_OF_T_HELPER_17_TYPE_IMMUNE_RESPONSE          | 1.53 | 1.40 | 0 | 0 | 0 | Enhanced |
| 13118 | REACTOME_GLYCOSPHINGOLIPID_METABOLISM                      | 1.53 | 1.40 | 0 | 0 | 0 | Enhanced |
| 13119 | GO_POSITIVE_REGULATION_OF_INTERLEUKIN_8_SECRETION          | 1.53 | 1.36 | 0 | 0 | 0 | Enhanced |
| 13120 | LEE_DOUBLE_POLAR_THYMOCYTE                                 | 1.53 | 1.36 | 0 | 0 | 0 | Enhanced |
| 13121 | GO_ESTABLISHMENT_OF_PLANAR_POLARITY_INVOLVED_IN_NEURAL_TU  | 1.53 | 1.34 | 0 | 0 | 0 | Enhanced |
| 13122 | BIOCARTA_MCM_PATHWAY                                       | 1.53 | 1.32 | 0 | 0 | 0 | Enhanced |
| 13123 | FISCHER_G1_S_CELL_CYCLE                                    | 1.54 | 2.83 | 0 | 0 | 0 | Enhanced |
| 13124 | GO_REGULATION_OF_PHOSPHATIDYLINOSITOL_3_KINASE_SIGNALING   | 1.54 | 1.96 | 0 | 0 | 0 | Enhanced |
| 13125 | GO_ANION_CHANNEL_ACTIVITY                                  | 1.54 | 1.82 | 0 | 0 | 0 | Enhanced |
| 13126 | GO_CAMP_CATABOLIC_PROCESS                                  | 1.54 | 1.73 | 0 | 0 | 0 | Enhanced |
| 13127 | GO_ENDOTHELIAL_CELL_APOPTOTIC_PROCESS                      | 1.54 | 1.57 | 0 | 0 | 0 | Enhanced |
| 13128 | GO ESTRADIOL_17_BETA_DEHYDROGENASE_ACTIVITY                | 1.54 | 1.49 | 0 | 0 | 0 | Enhanced |
| 13129 | GO_CHONDROITIN_SULFATE_PROTEOGLYCAN_BIOSYNTHETIC_PROCES    | 1.54 | 1.48 | 0 | 0 | 0 | Enhanced |
| 13130 | GO_POSITIVE_REGULATION_OF_INTERLEUKIN_17_PRODUCTION        | 1.54 | 1.42 | 0 | 0 | 0 | Enhanced |
| 13131 | HUMMEL_BURKITT'S_LYMPHOMA_DN                               | 1.54 | 1.41 | 0 | 0 | 0 | Enhanced |
| 13132 | REACTOME_RAS_ACTIVATION_UPON_CA2PLUS_INFLUX_THROUGH_NMDA   | 1.54 | 1.41 | 0 | 0 | 0 | Enhanced |
| 13133 | GO_MIDDLE_EAR_MORPHOGENESIS                                | 1.54 | 1.40 | 0 | 0 | 0 | Enhanced |
| 13134 | REACTOME_COMPETING_ENDOGENOUS_RNAS_CERNAS_REGULATE_PT      | 1.54 | 1.39 | 0 | 0 | 0 | Enhanced |
| 13135 | GO_DEFINITIVE_HEMOPOIESIS                                  | 1.54 | 1.38 | 0 | 0 | 0 | Enhanced |
| 13136 | GO_INTERFERON_GAMMA_SECRETION                              | 1.54 | 1.32 | 0 | 0 | 0 | Enhanced |
| 13137 | GO_VIRAL_GENE_EXPRESSION                                   | 1.55 | 4.00 | 0 | 0 | 0 | Enhanced |
| 13138 | WHITFIELD_CELL_CYCLE_G1_S                                  | 1.55 | 2.52 | 0 | 0 | 0 | Enhanced |
| 13139 | GO_INORGANIC_ANION_TRANSPORT                               | 1.55 | 1.96 | 0 | 0 | 0 | Enhanced |
| 13140 | BAE_BRCA1_TARGETS_DN                                       | 1.55 | 1.64 | 0 | 0 | 0 | Enhanced |
| 13141 | GO_EXTRACELLULAR_LIGAND_GATED_ION_CHANNEL_ACTIVITY         | 1.55 | 1.63 | 0 | 0 | 0 | Enhanced |
| 13142 | GO_SIGNAL_TRANSDUCTION_INVOLVED_IN_REGULATION_OF_GENE_EXF  | 1.55 | 1.61 | 0 | 0 | 0 | Enhanced |
| 13143 | GO_PHOSPHOLIPASE_C_ACTIVATING_G_PROTEIN_COUPLED_RECEPTOR   | 1.55 | 1.58 | 0 | 0 | 0 | Enhanced |
| 13144 | GO_SIALYLTRANSFERASE_ACTIVITY                              | 1.55 | 1.55 | 0 | 0 | 0 | Enhanced |
| 13145 | PID_ECADHERIN_KERATINOCYTE_PATHWAY                         | 1.55 | 1.55 | 0 | 0 | 0 | Enhanced |
| 13146 | GO_NATURAL_KILLER_CELL_PROLIFERATION                       | 1.55 | 1.53 | 0 | 0 | 0 | Enhanced |
| 13147 | GO_PHOSPHOLIPASE_A2_ACTIVITY                               | 1.55 | 1.52 | 0 | 0 | 0 | Enhanced |
| 13148 | LEE_LIVER_CANCER_CIPROFIBRATE_DN                           | 1.55 | 1.50 | 0 | 0 | 0 | Enhanced |
| 13149 | GO_CHONDROITIN_SULFATE_PROTEOGLYCAN_METABOLIC_PROCESS      | 1.55 | 1.49 | 0 | 0 | 0 | Enhanced |
| 13150 | GO_DNA_METHYLATION_INVOLVED_IN_GAMETE_GENERATION           | 1.55 | 1.44 | 0 | 0 | 0 | Enhanced |
| 13151 | GO_MANNOSIDASE_ACTIVITY                                    | 1.55 | 1.39 | 0 | 0 | 0 | Enhanced |
| 13152 | GO_OSTEOBLAST_PROLIFERATION                                | 1.55 | 1.35 | 0 | 0 | 0 | Enhanced |
| 13153 | LEE_BMP2_TARGETS_UP                                        | 1.56 | 4.00 | 0 | 0 | 0 | Enhanced |
| 13154 | ZWANG_TRANSIENTLY_UP_BY_2ND_EGF_PULSE_ONLY                 | 1.56 | 4.00 | 0 | 0 | 0 | Enhanced |
| 13155 | WOO_LIVER_CANCER_RECURRENCE_UP                             | 1.56 | 2.02 | 0 | 0 | 0 | Enhanced |
| 13156 | GO_SPHINGOLIPID_METABOLIC_PROCESS                          | 1.56 | 1.84 | 0 | 0 | 0 | Enhanced |
| 13157 | GO_POSITIVE_REGULATION_OF_NATURAL_KILLER_CELL_PROLIFERATIC | 1.56 | 1.69 | 0 | 0 | 0 | Enhanced |
| 13158 | CHR7Q31                                                    | 1.56 | 1.65 | 0 | 0 | 0 | Enhanced |
| 13159 | GO_GOLGI_CISTERNA_MEMBRANE                                 | 1.56 | 1.63 | 0 | 0 | 0 | Enhanced |
| 13160 | REACTOME_UNBLOCKING_OF_NMDA_RECEPTORS_Glutamate_BINDING    | 1.56 | 1.63 | 0 | 0 | 0 | Enhanced |
| 13161 | GO_GAMMA_DELTA_T_CELL_DIFFERENTIATION                      | 1.56 | 1.57 | 0 | 0 | 0 | Enhanced |
| 13162 | GO_NEGATIVE_REGULATION_OF_INTERLEUKIN_2_PRODUCTION         | 1.56 | 1.54 | 0 | 0 | 0 | Enhanced |
| 13163 | GO_INTERLEUKIN_10_PRODUCTION                               | 1.56 | 1.53 | 0 | 0 | 0 | Enhanced |
| 13164 | GO_POSITIVE_REGULATION_OF_TYROSINE_PHOSPHORYLATION_OF_ST   | 1.56 | 1.51 | 0 | 0 | 0 | Enhanced |
| 13165 | GO_T_HELPER_17_TYPE_IMMUNE_RESPONSE                        | 1.56 | 1.51 | 0 | 0 | 0 | Enhanced |
| 13166 | GO_CHONDROITIN_SULFATE_BIOSYNTHETIC_PROCESS                | 1.56 | 1.50 | 0 | 0 | 0 | Enhanced |
| 13167 | GO_TUMOR_NECROSIS_FACTOR_SECRETION                         | 1.56 | 1.50 | 0 | 0 | 0 | Enhanced |
| 13168 | GO_POSITIVE_REGULATION_OF_ISOTYPE_SWITCHING_TO_IGG_ISOTYPE | 1.56 | 1.49 | 0 | 0 | 0 | Enhanced |
| 13169 | CROONQUIST_IL6_DEPRIVATION_UP                              | 1.56 | 1.45 | 0 | 0 | 0 | Enhanced |
| 13170 | REACTOME_METABOLISM_OF_STEROID_HORMONES                    | 1.56 | 1.45 | 0 | 0 | 0 | Enhanced |
| 13171 | BIOCARTA_AMAN_PATHWAY                                      | 1.56 | 1.44 | 0 | 0 | 0 | Enhanced |
| 13172 | GO_ATRIAL_SEPTUM_DEVELOPMENT                               | 1.56 | 1.41 | 0 | 0 | 0 | Enhanced |
| 13173 | GO_REGULATION_OF_EPITHELIAL_TUBE_FORMATION                 | 1.56 | 1.40 | 0 | 0 | 0 | Enhanced |
| 13174 | GO_TRANSFORMING_GROWTH_FACTOR_BETA_PRODUCTION              | 1.56 | 1.39 | 0 | 0 | 0 | Enhanced |
| 13175 | REACTOME_SIGNALING_BY_FGFR1_IN_DISEASE                     | 1.56 | 1.38 | 0 | 0 | 0 | Enhanced |
| 13176 | GO_DESMOSOME                                               | 1.56 | 1.35 | 0 | 0 | 0 | Enhanced |
| 13177 | CHR19Q13                                                   | 1.57 | 4.00 | 0 | 0 | 0 | Enhanced |

|       |                                                                     |      |      |   |   |   |          |
|-------|---------------------------------------------------------------------|------|------|---|---|---|----------|
| 13178 | TAKEDA_TARGETS_OF_NUP98_HOXA9_FUSION_10D_UP                         | 1.57 | 2.14 | 0 | 0 | 0 | Enhanced |
| 13179 | MOLENAAR_TARGETS_OF_CCND1_AND_CDK4_UP                               | 1.57 | 1.89 | 0 | 0 | 0 | Enhanced |
| 13180 | GO_INORGANIC_ANION_TRANSMEMBRANE_TRANSPORT                          | 1.57 | 1.87 | 0 | 0 | 0 | Enhanced |
| 13181 | KANG_AR_TARGETS_UP                                                  | 1.57 | 1.72 | 0 | 0 | 0 | Enhanced |
| 13182 | GO_REGULATION_OF_CAMP_MEDIATED_SIGNALING                            | 1.57 | 1.66 | 0 | 0 | 0 | Enhanced |
| 13183 | GO_HISTONE_H4_K5_ACETYLATION                                        | 1.57 | 1.59 | 0 | 0 | 0 | Enhanced |
| 13184 | GO_NEURAL_PLATE_DEVELOPMENT                                         | 1.57 | 1.50 | 0 | 0 | 0 | Enhanced |
| 13185 | GO_TERMINAL_BOUTON                                                  | 1.57 | 1.47 | 0 | 0 | 0 | Enhanced |
| 13186 | IZUKA_LIVER_CANCER_PROGRESSION_L1_G1_UP                             | 1.57 | 1.47 | 0 | 0 | 0 | Enhanced |
| 13187 | REACTOME_STAT5_ACTIVATION                                           | 1.57 | 1.44 | 0 | 0 | 0 | Enhanced |
| 13188 | ZHENG_RESPONSE_TO_ARSENITE_UP                                       | 1.57 | 1.44 | 0 | 0 | 0 | Enhanced |
| 13189 | GO_BONE_MATURATION                                                  | 1.57 | 1.43 | 0 | 0 | 0 | Enhanced |
| 13190 | GO_TRANSLATIONAL_INITIATION                                         | 1.58 | 2.83 | 0 | 0 | 0 | Enhanced |
| 13191 | WU_CELL_MIGRATION                                                   | 1.58 | 2.78 | 0 | 0 | 0 | Enhanced |
| 13192 | GO_POSITIVE_REGULATION_OF_INTERFERON_GAMMA_SECRETION                | 1.58 | 1.95 | 0 | 0 | 0 | Enhanced |
| 13193 | PYEON_HP_V_POSITIVE_TUMORS_UP                                       | 1.58 | 1.82 | 0 | 0 | 0 | Enhanced |
| 13194 | GO_ESTABLISHMENT_OF_PLANAR_POLARITY_OF_EMBRYONIC_EPITHELIUM         | 1.58 | 1.64 | 0 | 0 | 0 | Enhanced |
| 13195 | GO_EXCITATORY_SYNAPSE                                               | 1.58 | 1.59 | 0 | 0 | 0 | Enhanced |
| 13196 | GO_EXTRACELLULAR_MATRIX_STRUCTURAL_CONSTITUENT_CONFERRING_EFFECT    | 1.58 | 1.58 | 0 | 0 | 0 | Enhanced |
| 13197 | KEGG_COMPLEMENT_AND_COAGULATION_CASCADES                            | 1.58 | 1.58 | 0 | 0 | 0 | Enhanced |
| 13198 | PID_NFKAPPAB_ATYPICAL_PATHWAY                                       | 1.58 | 1.58 | 0 | 0 | 0 | Enhanced |
| 13199 | GO_NEGATIVE_REGULATION_OF_CARDIAC_MUSCLE_CELL_PROLIFERATION         | 1.58 | 1.56 | 0 | 0 | 0 | Enhanced |
| 13200 | BIOCARTA_IL7_PATHWAY                                                | 1.58 | 1.53 | 0 | 0 | 0 | Enhanced |
| 13201 | GO_SIALYLATION                                                      | 1.58 | 1.51 | 0 | 0 | 0 | Enhanced |
| 13202 | RIZ_ERYTHROID_DIFFERENTIATION_HEMGN                                 | 1.58 | 1.46 | 0 | 0 | 0 | Enhanced |
| 13203 | GO_POSITIVE_REGULATION_OF_ENDOTHELIAL_CELL_APOPTOTIC_PROCESS        | 1.58 | 1.39 | 0 | 0 | 0 | Enhanced |
| 13204 | REACTOME_ERYTHROPOIETIN_ACTIVATES_STAT5                             | 1.59 | 2.12 | 0 | 0 | 0 | Enhanced |
| 13205 | JAK2_DN.V1_DN                                                       | 1.59 | 2.06 | 0 | 0 | 0 | Enhanced |
| 13206 | TERAMOTO_OPN_TARGETS_CLUSTER_3                                      | 1.59 | 1.95 | 0 | 0 | 0 | Enhanced |
| 13207 | REACTOME_NEGATIVE_REGULATION_OF_NMDA_RECEPTOR_MEDIATED_TRANSMISSION | 1.59 | 1.67 | 0 | 0 | 0 | Enhanced |
| 13208 | MCCABE_HOXC6_TARGETS_CANCER_UP                                      | 1.59 | 1.64 | 0 | 0 | 0 | Enhanced |
| 13209 | BIOCARTA_EDG1_PATHWAY                                               | 1.59 | 1.62 | 0 | 0 | 0 | Enhanced |
| 13210 | SABATES_COLORECTAL_ADENOMA_SIZE_UP                                  | 1.59 | 1.61 | 0 | 0 | 0 | Enhanced |
| 13211 | NIKOLSKY_BREAST_CANCER_19Q13.1_AMPLICON                             | 1.59 | 1.58 | 0 | 0 | 0 | Enhanced |
| 13212 | GO_INTRINSIC_COMPONENT_OF_PRESYNAPTIC_ACTIVE_ZONE_MEMBRANE          | 1.59 | 1.56 | 0 | 0 | 0 | Enhanced |
| 13213 | GAUSSMANN_MLL_AF4_FUSION_TARGETS_E_DN                               | 1.59 | 1.52 | 0 | 0 | 0 | Enhanced |
| 13214 | JISON_SICKLE_CELL_DISEASE_DN                                        | 1.60 | 4.00 | 0 | 0 | 0 | Enhanced |
| 13215 | ODONNELL_TARGETS_OF_MYC_AND_TFRC_UP                                 | 1.60 | 2.10 | 0 | 0 | 0 | Enhanced |
| 13216 | KRAS_BREAST_UP.V1_DN                                                | 1.60 | 1.96 | 0 | 0 | 0 | Enhanced |
| 13217 | GO_POTASSIUM_ION_EXPORT_ACROSS_PLASMA_MEMBRANE                      | 1.60 | 1.88 | 0 | 0 | 0 | Enhanced |
| 13218 | PID_NCADHERIN_PATHWAY                                               | 1.60 | 1.70 | 0 | 0 | 0 | Enhanced |
| 13219 | GO_GLUTAMATE_RECEPTOR_SIGNALING_PATHWAY                             | 1.60 | 1.69 | 0 | 0 | 0 | Enhanced |
| 13220 | GO_GASTRULATION_WITH_MOUTH_FORMING_SECOND_STAGE                     | 1.60 | 1.64 | 0 | 0 | 0 | Enhanced |
| 13221 | GO_REGULATORY_T_CELL_DIFFERENTIATION                                | 1.60 | 1.64 | 0 | 0 | 0 | Enhanced |
| 13222 | RAMJAUN_APOPTOSIS_BY_TGFB1_VIA_SMAD4_UP                             | 1.60 | 1.55 | 0 | 0 | 0 | Enhanced |
| 13223 | BHATI_G2M_ARREST_BY_2METHOXYESTRADIOL_DN                            | 1.61 | 2.33 | 0 | 0 | 0 | Enhanced |
| 13224 | GARCIA_TARGETS_OF_FL11_AND_DAX1_UP                                  | 1.61 | 2.07 | 0 | 0 | 0 | Enhanced |
| 13225 | MIKKELSEN_IPS_ICP_WITH_H3K4ME3_AND_H327ME3                          | 1.61 | 1.87 | 0 | 0 | 0 | Enhanced |
| 13226 | GO_POSITIVE_REGULATION_OF_INTERLEUKIN_10_PRODUCTION                 | 1.61 | 1.86 | 0 | 0 | 0 | Enhanced |
| 13227 | REACTOME_FGFR1_MUTANT_RECEPTOR_ACTIVATION                           | 1.61 | 1.79 | 0 | 0 | 0 | Enhanced |
| 13228 | GO_INTEGRAL_COMPONENT_OF_PRESYNAPTIC_ACTIVE_ZONE_MEMBRANE           | 1.61 | 1.78 | 0 | 0 | 0 | Enhanced |
| 13229 | WEBER_METHYLATED_HCP_IN_SPERM_DN                                    | 1.61 | 1.75 | 0 | 0 | 0 | Enhanced |
| 13230 | REACTOME_CHONDROITIN_SULFATE_BIOSYNTHESIS                           | 1.61 | 1.66 | 0 | 0 | 0 | Enhanced |
| 13231 | GO_DOPAMINE_TRANSPORT                                               | 1.61 | 1.59 | 0 | 0 | 0 | Enhanced |
| 13232 | MIKKELSEN_MEF_ICP_WITH_H3K27ME3                                     | 1.62 | 2.30 | 0 | 0 | 0 | Enhanced |
| 13233 | GO_INORGANIC_ANION_TRANSMEMBRANE_TRANSPORTER_ACTIVITY               | 1.62 | 2.13 | 0 | 0 | 0 | Enhanced |
| 13234 | GO_INTRACELLULAR_CALCIIUM_ACTIVATED_CHLORIDE_CHANNEL_ACTIVATION     | 1.62 | 1.95 | 0 | 0 | 0 | Enhanced |
| 13235 | KEGG_ASTHMA                                                         | 1.62 | 1.85 | 0 | 0 | 0 | Enhanced |
| 13236 | GO_REGULATION_OF_NATURAL_KILLER_CELL_ACTIVATION                     | 1.62 | 1.80 | 0 | 0 | 0 | Enhanced |
| 13237 | GO_NEGATIVE_REGULATION_OF_LYMPHOCYTE_MEDIATED_IMMUNITY              | 1.62 | 1.72 | 0 | 0 | 0 | Enhanced |
| 13238 | REACTOME_LONG_TERM_POTENTIATION                                     | 1.62 | 1.49 | 0 | 0 | 0 | Enhanced |
| 13239 | GO_ACTIVATION_OF_PHOSPHOLIPASE_C_ACTIVITY                           | 1.63 | 1.98 | 0 | 0 | 0 | Enhanced |
| 13240 | MONTERO_THYROID_CANCER_POOR_SURVIVAL_DN                             | 1.63 | 1.88 | 0 | 0 | 0 | Enhanced |
| 13241 | REACTOME_SIGNALING_BY_LEPTIN                                        | 1.63 | 1.74 | 0 | 0 | 0 | Enhanced |
| 13242 | GO_3_5_CYCLIC_AMP_PHOSPHODIESTERASE_ACTIVITY                        | 1.63 | 1.72 | 0 | 0 | 0 | Enhanced |
| 13243 | RIZ_ERYTHROID_DIFFERENTIATION_APOBEC2                               | 1.63 | 1.71 | 0 | 0 | 0 | Enhanced |
| 13244 | GO_POSITIVE_REGULATION_OF_MESENCHYMAL_CELL_PROLIFERATION            | 1.63 | 1.70 | 0 | 0 | 0 | Enhanced |
| 13245 | GO_AMPA_GLUTAMATE_RECEPTOR_COMPLEX                                  | 1.63 | 1.47 | 0 | 0 | 0 | Enhanced |
| 13246 | YAO_TEMPORAL_RESPONSE_TO_PROGESTERONE_CLUSTER_0                     | 1.64 | 2.31 | 0 | 0 | 0 | Enhanced |
| 13247 | CHIARETTI_T_ALL_REFRACTORY_TO_THERAPY                               | 1.64 | 1.99 | 0 | 0 | 0 | Enhanced |
| 13248 | HALMOS_CEBPA_TARGETS_UP                                             | 1.64 | 1.99 | 0 | 0 | 0 | Enhanced |
| 13249 | GO_SPHINGOLIPID_BINDING                                             | 1.64 | 1.75 | 0 | 0 | 0 | Enhanced |
| 13250 | NIELSEN_GIST_VS_SYNOVIAL_SARCOMA_UP                                 | 1.64 | 1.75 | 0 | 0 | 0 | Enhanced |
| 13251 | GO_IONOTROPIC_GLUTAMATE_RECEPTOR_SIGNALING_PATHWAY                  | 1.64 | 1.69 | 0 | 0 | 0 | Enhanced |
| 13252 | GO_COMPLEMENT_ACTIVATION                                            | 1.64 | 1.68 | 0 | 0 | 0 | Enhanced |
| 13253 | CHR16Q13                                                            | 1.64 | 1.65 | 0 | 0 | 0 | Enhanced |
| 13254 | GO_N_GLYCAN_PROCESSING                                              | 1.64 | 1.60 | 0 | 0 | 0 | Enhanced |
| 13255 | GO_HYDROLASE_ACTIVITY_HYDROLYZING_O_GLYCOSYL_COMPOUNDS              | 1.65 | 2.49 | 0 | 0 | 0 | Enhanced |
| 13256 | IL15_UP.V1_DN                                                       | 1.65 | 2.49 | 0 | 0 | 0 | Enhanced |
| 13257 | GO_POSITIVE_REGULATION_OF_PHOSPHATIDYLINOSITOL_3_KINASE_SIC         | 1.65 | 2.48 | 0 | 0 | 0 | Enhanced |
| 13258 | GO_REGULATION_OF_INTERFERON_GAMMA_SECRETION                         | 1.65 | 2.27 | 0 | 0 | 0 | Enhanced |
| 13259 | WILLIAMS_ESR1_TARGETS_DN                                            | 1.65 | 2.11 | 0 | 0 | 0 | Enhanced |
| 13260 | GO_CHLORIDE_CHANNEL_ACTIVITY                                        | 1.65 | 1.97 | 0 | 0 | 0 | Enhanced |
| 13261 | REACTOME_CS_DS_DEGRADATION                                          | 1.65 | 1.96 | 0 | 0 | 0 | Enhanced |
| 13262 | GO_CHLORIDE_TRANSMEMBRANE_TRANSPORT                                 | 1.65 | 1.82 | 0 | 0 | 0 | Enhanced |
| 13263 | GO_MONOAMINE_TRANSPORT                                              | 1.65 | 1.81 | 0 | 0 | 0 | Enhanced |
| 13264 | BIOCARTA_IL22BP_PATHWAY                                             | 1.65 | 1.75 | 0 | 0 | 0 | Enhanced |
| 13265 | GO_POSTSYNAPTIC_DENSITY_MEMBRANE                                    | 1.65 | 1.73 | 0 | 0 | 0 | Enhanced |
| 13266 | GO_POSITIVE_REGULATION_OF_PHOSPHOLIPASE_ACTIVITY                    | 1.66 | 1.90 | 0 | 0 | 0 | Enhanced |
| 13267 | GO_REGULATION_OF_CELL_FATE_COMMITMENT                               | 1.66 | 1.65 | 0 | 0 | 0 | Enhanced |
| 13268 | TONKS_TARGETS_OF_RUNX1_RUNX11_FUSION_HSC_UP                         | 1.67 | 2.81 | 0 | 0 | 0 | Enhanced |
| 13269 | GO_APICOLATERAL_PLASMA_MEMBRANE                                     | 1.67 | 2.42 | 0 | 0 | 0 | Enhanced |
| 13270 | GO_RESPONSE_TO_COPPER_ION                                           | 1.67 | 2.17 | 0 | 0 | 0 | Enhanced |
| 13271 | GAUSSMANN_MLL_AF4_FUSION_TARGETS_G_UP                               | 1.68 | 4.00 | 0 | 0 | 0 | Enhanced |
| 13272 | HOELZEL_NF1_TARGETS_DN                                              | 1.68 | 2.48 | 0 | 0 | 0 | Enhanced |
| 13273 | GO_EMBRYONIC_DIGIT_MORPHOGENESIS                                    | 1.68 | 2.17 | 0 | 0 | 0 | Enhanced |
| 13274 | GO_REGULATION_OF_GERMINAL_CENTER_FORMATION                          | 1.68 | 2.13 | 0 | 0 | 0 | Enhanced |
| 13275 | STEGEER_ADIPOGENESIS_DN                                             | 1.68 | 2.12 | 0 | 0 | 0 | Enhanced |
| 13276 | GO_FAT_PAD_DEVELOPMENT                                              | 1.68 | 1.95 | 0 | 0 | 0 | Enhanced |
| 13277 | MATTHEWS_AP1_TARGETS                                                | 1.68 | 1.89 | 0 | 0 | 0 | Enhanced |
| 13278 | WANG_RESPONSE_TO_GSK3_INHIBITOR_SB216763_UP                         | 1.69 | 4.00 | 0 | 0 | 0 | Enhanced |
| 13279 | GO_CHONDROITIN_SULFATE_CATABOLIC_PROCESS                            | 1.69 | 2.24 | 0 | 0 | 0 | Enhanced |
| 13280 | GO_SPLEEN_DEVELOPMENT                                               | 1.69 | 2.17 | 0 | 0 | 0 | Enhanced |
| 13281 | GO_RESPONSE_TO_INTERLEUKIN_9                                        | 1.69 | 2.13 | 0 | 0 | 0 | Enhanced |
| 13282 | GO_STRESS_RESPONSE_TO_METAL_ION                                     | 1.69 | 2.13 | 0 | 0 | 0 | Enhanced |
| 13283 | GO_GAMMA_DELTA_T_CELL_ACTIVATION                                    | 1.69 | 1.96 | 0 | 0 | 0 | Enhanced |
| 13284 | GO_CILIUM_MOVEMENT                                                  | 1.69 | 1.92 | 0 | 0 | 0 | Enhanced |
| 13285 | REACTOME_COMPLEMENT_CASCADE                                         | 1.69 | 1.90 | 0 | 0 | 0 | Enhanced |
| 13286 | REACTOME_INTERLEUKIN_9_SIGNALING                                    | 1.70 | 2.43 | 0 | 0 | 0 | Enhanced |

|       |                                                            |      |      |   |   |   |          |
|-------|------------------------------------------------------------|------|------|---|---|---|----------|
| 13287 | GO_DORSAL_SPINAL_CORD_DEVELOPMENT                          | 1.70 | 2.42 | 0 | 0 | 0 | Enhanced |
| 13288 | GO_CELLULAR_RESPONSE_TO_CADMIUM_ION                        | 1.70 | 2.29 | 0 | 0 | 0 | Enhanced |
| 13289 | GO_POSITIVE_REGULATION_OF_VASCULAR_ENDOTHELIAL_CELL_PROLI  | 1.70 | 2.25 | 0 | 0 | 0 | Enhanced |
| 13290 | GO_CATENIN_COMPLEX                                         | 1.70 | 2.13 | 0 | 0 | 0 | Enhanced |
| 13291 | GO_VASCULAR_ENDOTHELIAL_CELL_PROLIFERATION                 | 1.70 | 2.04 | 0 | 0 | 0 | Enhanced |
| 13292 | WHITFIELD_CELL_CYCLE_S                                     | 1.71 | 4.00 | 0 | 0 | 0 | Enhanced |
| 13293 | NIKOLSKY_BREAST_CANCER_16P13_AMPICON                       | 1.71 | 2.79 | 0 | 0 | 0 | Enhanced |
| 13294 | GO_STARTLE_RESPONSE                                        | 1.71 | 2.26 | 0 | 0 | 0 | Enhanced |
| 13295 | GO_NEGATIVE_REGULATION_OF_B_CELL_MEDIATED_IMMUNITY         | 1.71 | 2.14 | 0 | 0 | 0 | Enhanced |
| 13296 | LEIN_OLIGODENDROCYTE_MARKERS                               | 1.71 | 2.08 | 0 | 0 | 0 | Enhanced |
| 13297 | REACTOME_SYNAPTIC_ADHESION_LIKE_MOLECULES                  | 1.71 | 1.97 | 0 | 0 | 0 | Enhanced |
| 13298 | GO_GROWTH_HORMONE_RECEPTOR_SIGNALING_PATHWAY_VIA_JAK_S     | 1.72 | 2.73 | 0 | 0 | 0 | Enhanced |
| 13299 | GO_POLYSOMAL_RIBOSOME                                      | 1.72 | 2.28 | 0 | 0 | 0 | Enhanced |
| 13300 | CHR18Q11                                                   | 1.72 | 2.16 | 0 | 0 | 0 | Enhanced |
| 13301 | BILD_E2F3_ONCOGENIC_SIGNATURE                              | 1.73 | 4.00 | 0 | 0 | 0 | Enhanced |
| 13302 | OSMAN_BLADDER_CANCER_DN                                    | 1.73 | 4.00 | 0 | 0 | 0 | Enhanced |
| 13303 | GO_NEGATIVE_REGULATION_OF_CAMP_MEDIATED_SIGNALING          | 1.73 | 2.26 | 0 | 0 | 0 | Enhanced |
| 13304 | TONKS_TARGETS_OF_RUNX1_RUNX1T1_FUSION_SUSTAINED_IN_GRANULI | 1.73 | 2.13 | 0 | 0 | 0 | Enhanced |
| 13305 | ZHENG_FOXP3_TARGETS_IN_T_LYMPHOCYTE_DN                     | 1.74 | 4.00 | 0 | 0 | 0 | Enhanced |
| 13306 | GO_POSITIVE_REGULATION_OF_CYTOSOLIC_CALCIIUM_ION_CONCENTR  | 1.74 | 2.74 | 0 | 0 | 0 | Enhanced |
| 13307 | SHIPP_DLBCL_VS_FOLLICULAR_LYMPHOMA_DN                      | 1.74 | 2.74 | 0 | 0 | 0 | Enhanced |
| 13308 | GO_ZINC_ION_HOMEOSTASIS                                    | 1.74 | 2.44 | 0 | 0 | 0 | Enhanced |
| 13309 | REACTOME_METALLOTHIONEINS_BIND_METALS                      | 1.74 | 2.25 | 0 | 0 | 0 | Enhanced |
| 13310 | GO_AXONEME_PART                                            | 1.74 | 1.96 | 0 | 0 | 0 | Enhanced |
| 13311 | SENGUPTA_NASOPHARYNGEAL_CARCIOMA_DN                        | 1.76 | 4.00 | 0 | 0 | 0 | Enhanced |
| 13312 | YAMASHITA_LIVER_CANCER_WITH_EPCAM_UP                       | 1.76 | 2.76 | 0 | 0 | 0 | Enhanced |
| 13313 | PID_CD40_PATHWAY                                           | 1.76 | 2.75 | 0 | 0 | 0 | Enhanced |
| 13314 | WATANABE_COLON_CANCER_MSJ_VS_MSS_UP                        | 1.76 | 2.27 | 0 | 0 | 0 | Enhanced |
| 13315 | GO_DNA_BINDING_TRANSCRIPTION_FACTOR_ACTIVITY               | 1.77 | 4.00 | 0 | 0 | 0 | Enhanced |
| 13316 | IL2_UP.V1_DN                                               | 1.77 | 4.00 | 0 | 0 | 0 | Enhanced |
| 13317 | REACTOME_SELENOAMINO_ACID_METABOLISM                       | 1.77 | 4.00 | 0 | 0 | 0 | Enhanced |
| 13318 | GO_PRC1_COMPLEX                                            | 1.77 | 2.27 | 0 | 0 | 0 | Enhanced |
| 13319 | GO_REGULATION_OF_PHOSPHOLIPASE_C_ACTIVITY                  | 1.77 | 2.00 | 0 | 0 | 0 | Enhanced |
| 13320 | GO_CYTOSOLIC_LARGE_RIBOSOMAL_SUBUNIT                       | 1.78 | 4.00 | 0 | 0 | 0 | Enhanced |
| 13321 | KINSEY_TARGETS_OF_EWSR1_FLII_FUSION_DN                     | 1.78 | 4.00 | 0 | 0 | 0 | Enhanced |
| 13322 | GO_SPHINGOLIPID_MEDIATED_SIGNALING_PATHWAY                 | 1.79 | 4.00 | 0 | 0 | 0 | Enhanced |
| 13323 | IVANOVA_HEMATOPOIESIS_STEM_CELL_SHORT_TERM                 | 1.79 | 4.00 | 0 | 0 | 0 | Enhanced |
| 13324 | REACTOME_RESPONSE_TO_METAL_IONS                            | 1.79 | 4.00 | 0 | 0 | 0 | Enhanced |
| 13325 | TENEDINI_MEGAKARYOCYTE_MARKERS                             | 1.79 | 4.00 | 0 | 0 | 0 | Enhanced |
| 13326 | GO_B_CELL_MEDIATED_IMMUNITY                                | 1.79 | 2.78 | 0 | 0 | 0 | Enhanced |
| 13327 | GO_SPHINGOSINE_1_PHOSPHATE_RECEPTOR_SIGNALING_PATHWAY      | 1.79 | 2.73 | 0 | 0 | 0 | Enhanced |
| 13328 | HOLLEMAN_VINCISTINE_RESISTANCE_ALL_DN                      | 1.79 | 2.43 | 0 | 0 | 0 | Enhanced |
| 13329 | GO_PHOSPHATIDYLSERINE_METABOLIC_PROCESS                    | 1.79 | 2.42 | 0 | 0 | 0 | Enhanced |
| 13330 | GO_CHLORIDE_TRANSMEMBRANE_TRANSPORTER_ACTIVITY             | 1.80 | 4.00 | 0 | 0 | 0 | Enhanced |
| 13331 | REACTOME_ACTIVATION_OF_THE_MRNA_UPON_BINDING_OF_THE_CAP_   | 1.80 | 4.00 | 0 | 0 | 0 | Enhanced |
| 13332 | YAN_ESCAPE_FROM_APOIKIS                                    | 1.80 | 2.73 | 0 | 0 | 0 | Enhanced |
| 13333 | GO_SYNAPSIS                                                | 1.80 | 2.17 | 0 | 0 | 0 | Enhanced |
| 13334 | GO_ANIMAL_ORGAN_MATURATION                                 | 1.81 | 4.00 | 0 | 0 | 0 | Enhanced |
| 13335 | GO_SPHINGOSINE_1_PHOSPHATE_RECEPTOR_ACTIVITY               | 1.82 | 4.00 | 0 | 0 | 0 | Enhanced |
| 13336 | GO_SPECIFICATION_OF_SYMMETRY                               | 1.82 | 2.79 | 0 | 0 | 0 | Enhanced |
| 13337 | REACTOME_LYSOSPHINGOLIPID_AND_LPA_RECEPTORS                | 1.83 | 4.00 | 0 | 0 | 0 | Enhanced |
| 13338 | GO_GERMINAL_CENTER_FORMATION                               | 1.83 | 2.71 | 0 | 0 | 0 | Enhanced |
| 13339 | DUTERTRE_ESTRADIOL_RESPONSE_6HR_DN                         | 1.84 | 4.00 | 0 | 0 | 0 | Enhanced |
| 13340 | E2F3_UP.V1_UP                                              | 1.85 | 4.00 | 0 | 0 | 0 | Enhanced |
| 13341 | KEGG_INTESTINAL_IMMUNE_NETWORK_FOR_IgA_PRODUCTION          | 1.85 | 2.75 | 0 | 0 | 0 | Enhanced |
| 13342 | REACTOME_NEUREXINS_AND_NEUROLIGINS                         | 1.86 | 4.00 | 0 | 0 | 0 | Enhanced |
| 13343 | GO_CELLULAR_RESPONSE_TO_COPPER_ION                         | 1.86 | 2.73 | 0 | 0 | 0 | Enhanced |
| 13344 | GO_PROTEIN_TARGETING_TO_MEMBRANE                           | 1.87 | 4.00 | 0 | 0 | 0 | Enhanced |
| 13345 | REACTOME_NONSENSE_MEDIATED_DECAY_NMD                       | 1.87 | 4.00 | 0 | 0 | 0 | Enhanced |
| 13346 | CSR_EARLY_UP.V1_DN                                         | 1.88 | 4.00 | 0 | 0 | 0 | Enhanced |
| 13347 | MARZEC_IL2_SIGNALING_DN                                    | 1.88 | 2.73 | 0 | 0 | 0 | Enhanced |
| 13348 | GO_NUCLEAR_TRANSCRIBED_MRNA_CATABOLIC_PROCESS_NONSENSE     | 1.89 | 4.00 | 0 | 0 | 0 | Enhanced |
| 13349 | MEISSNER_BRAIN_HCP_WITH_H3K27ME3                           | 1.89 | 4.00 | 0 | 0 | 0 | Enhanced |
| 13350 | NAKAJIMA_MAST_CELL                                         | 1.89 | 2.75 | 0 | 0 | 0 | Enhanced |
| 13351 | SARTIPY_NORMAL_AT_INSULIN_RESISTANCE_DN                    | 1.89 | 2.44 | 0 | 0 | 0 | Enhanced |
| 13352 | GO_CELLULAR_RESPONSE_TO_ZINC_ION                           | 1.92 | 4.00 | 0 | 0 | 0 | Enhanced |
| 13353 | HOLLEMAN_AS PARAGINASE_RESISTANCE_B_ALL_UP                 | 1.92 | 4.00 | 0 | 0 | 0 | Enhanced |
| 13354 | REACTOME_EUKARYOTIC_TRANSLATION_INITIATION                 | 1.92 | 4.00 | 0 | 0 | 0 | Enhanced |
| 13355 | BILANGES_SERUM_RESPONSE_TRANSLATION                        | 1.95 | 4.00 | 0 | 0 | 0 | Enhanced |
| 13356 | GO_AXONEME_ASSEMBLY                                        | 1.95 | 4.00 | 0 | 0 | 0 | Enhanced |
| 13357 | CHNG_MULTIPLE_MYELOMA_HYPERPLOID_UP                        | 1.96 | 4.00 | 0 | 0 | 0 | Enhanced |
| 13358 | GO_PROTEIN_LOCALIZATION_TO_ENDOPLASMIC_RETICULUM           | 1.97 | 4.00 | 0 | 0 | 0 | Enhanced |
| 13359 | GO_HUMORAL_IMMUNE_RESPONSE_MEDIATED_BY_CIRCULATING_IMMUN   | 1.99 | 4.00 | 0 | 0 | 0 | Enhanced |
| 13360 | GO_NEGATIVE_REGULATION_OF_TUMOR_NECROSIS_FACTOR_SUPERF     | 1.99 | 4.00 | 0 | 0 | 0 | Enhanced |
| 13361 | GO_NEUROTRANSMITTER_RECEPTOR_COMPLEX                       | 1.99 | 4.00 | 0 | 0 | 0 | Enhanced |
| 13362 | GO_CYTOSOLIC_SMALL_RIBOSOMAL_SUBUNIT                       | 2.04 | 4.00 | 0 | 0 | 0 | Enhanced |
| 13363 | GO_ESTABLISHMENT_OF_PROTEIN_LOCALIZATION_TO_ENDOPLASMIC_F  | 2.04 | 4.00 | 0 | 0 | 0 | Enhanced |
| 13364 | GO_BIOACTIVE_LIPID_RECEPTOR_ACTIVITY                       | 2.05 | 4.00 | 0 | 0 | 0 | Enhanced |
| 13365 | GO_CYTOSOLIC_RIBOSOME                                      | 2.06 | 4.00 | 0 | 0 | 0 | Enhanced |
| 13366 | NAKAYAMA_FRA2_TARGETS                                      | 2.06 | 4.00 | 0 | 0 | 0 | Enhanced |
| 13367 | CHR19P12                                                   | 2.14 | 4.00 | 0 | 0 | 0 | Enhanced |
| 13368 | REACTOME_SRP_DEPENDENT_COTRANSLATIONAL_PROTEIN_TARGETIN    | 2.14 | 4.00 | 0 | 0 | 0 | Enhanced |
| 13369 | REACTOME_NONSENSE_MEDIATED_DECAY_NMD_INDEPENDENT_OF_THI    | 2.15 | 4.00 | 0 | 0 | 0 | Enhanced |
| 13370 | KEGG_RIBOSOME                                              | 2.27 | 4.00 | 0 | 0 | 0 | Enhanced |
| 13371 | MTOR_UP.N4.V1_DN                                           | 2.30 | 4.00 | 0 | 0 | 0 | Enhanced |
| 13372 | BILANGES_SERUM_AND_RAPAMYCIN_SENSITIVE_GENES               | 2.31 | 4.00 | 0 | 0 | 0 | Enhanced |
| 13373 | GO_COTRANSLATIONAL_PROTEIN_TARGETING_TO_MEMBRANE           | 2.34 | 4.00 | 0 | 0 | 0 | Enhanced |

**Supplementary Table 7B.** Gene set enrichment for the transcriptional changes induced by RZ-2994 at Day 1 on KOPTK1 cells. MSigDB v7.0 collection, significance  $-\log_{10}(P\text{-value}+0.0001)>1$ . Effect of RZ-2994 on pathway based on Normalized Enrichment Score (NES): NES < -1.5 Repressed, NES > 1.5 Enhanced.

| #  | Gene set                                                         | Normalized Enrichment Score (NES) at Day 1 | $-\log_{10}(P\text{-value}+0.0001)$ at Day 1 | Amino Acid gene set signatures (1=yes, 0=no) | MYC gene set signatures (1=yes, 0=no) | Cell Cycle gene set signatures (1=yes, 0=no) | RZ-2994 vs. DMSO transcriptional effect on pathway at Day 1 |
|----|------------------------------------------------------------------|--------------------------------------------|----------------------------------------------|----------------------------------------------|---------------------------------------|----------------------------------------------|-------------------------------------------------------------|
| 1  | GO_PRERIBOSOME                                                   | -2.59                                      | 4                                            | 0                                            | 0                                     | 0                                            | Repressed                                                   |
| 2  | FISCHER_G2_M_CELL_CYCLE                                          | -2.57                                      | 4                                            | 0                                            | 0                                     | 1                                            | Repressed                                                   |
| 3  | GARY_CD5_TARGETS_DN                                              | -2.50                                      | 4                                            | 0                                            | 0                                     | 0                                            | Repressed                                                   |
| 4  | REACTOME_RRNA_MODIFICATION_IN_THE_NUCLEUS_AND_CYTOSOL            | -2.47                                      | 4                                            | 0                                            | 0                                     | 0                                            | Repressed                                                   |
| 5  | NAKAYAMA_SOFT_TISSUE_TUMORS_PCA2_UP                              | -2.46                                      | 4                                            | 0                                            | 0                                     | 0                                            | Repressed                                                   |
| 6  | GO_RIBOSOME_BIOGENESIS                                           | -2.45                                      | 4                                            | 0                                            | 0                                     | 0                                            | Repressed                                                   |
| 7  | WHITFIELD_CELL_CYCLE_G2_M                                        | -2.45                                      | 4                                            | 0                                            | 0                                     | 0                                            | Repressed                                                   |
| 8  | PENG_GlutAMINE_DEPRIVATION_DN                                    | -2.44                                      | 4                                            | 1                                            | 0                                     | 0                                            | Repressed                                                   |
| 9  | TANG_SENESCENCE_TP53_TARGETS_DN                                  | -2.43                                      | 4                                            | 0                                            | 0                                     | 0                                            | Repressed                                                   |
| 10 | YAO_TEMPORAL_RESPONSE_TO_PROGESTERONE_CLUSTER_11                 | -2.43                                      | 4                                            | 0                                            | 0                                     | 0                                            | Repressed                                                   |
| 11 | PENG_LEUCINE_DEPRIVATION_DN                                      | -2.41                                      | 4                                            | 1                                            | 0                                     | 0                                            | Repressed                                                   |
| 12 | AMUNDSON_GAMMA_RADIATION_RESPONSE                                | -2.40                                      | 4                                            | 0                                            | 0                                     | 0                                            | Repressed                                                   |
| 13 | REACTOME_APC_C_CDHI_MEDIATED_DEGRADATION_OF_CDC20_AND_OTHER_APC  | -2.40                                      | 4                                            | 0                                            | 0                                     | 0                                            | Repressed                                                   |
| 14 | REACTOME_REGULATION_OF_MITOTIC_CELL_CYCLE                        | -2.40                                      | 4                                            | 0                                            | 0                                     | 0                                            | Repressed                                                   |
| 15 | ELVIDGE_HYPOXIA_DN                                               | -2.38                                      | 4                                            | 0                                            | 0                                     | 0                                            | Repressed                                                   |
| 16 | GO_RRNA_METABOLIC_PROCESS                                        | -2.38                                      | 4                                            | 0                                            | 0                                     | 0                                            | Repressed                                                   |
| 17 | HALLMARK_MYC_TARGETS_V2                                          | -2.38                                      | 4                                            | 0                                            | 1                                     | 0                                            | Repressed                                                   |
| 18 | GO_ANAPHASE_PROMOTING_COMPLEX_DEPENDENT_CATABOLIC_PROCESS        | -2.37                                      | 4                                            | 0                                            | 0                                     | 0                                            | Repressed                                                   |
| 19 | HALLMARK_MYC_TARGETS_V1                                          | -2.37                                      | 4                                            | 0                                            | 1                                     | 0                                            | Repressed                                                   |
| 20 | REACTOME_ACTIVATION_OF_APC_C_AND_APC_C_CDC20_MEDIATED_DEGRADATIC | -2.37                                      | 4                                            | 0                                            | 0                                     | 0                                            | Repressed                                                   |
| 21 | SCHLOSSER_MYC_TARGETS_AND_SERUM_RESPONSE_DN                      | -2.35                                      | 4                                            | 0                                            | 0                                     | 0                                            | Repressed                                                   |
| 22 | GO_NCRNA_METABOLIC_PROCESS                                       | -2.34                                      | 4                                            | 0                                            | 0                                     | 0                                            | Repressed                                                   |
| 23 | KARLSSON_TGFB1_TARGETS_UP                                        | -2.34                                      | 4                                            | 0                                            | 0                                     | 0                                            | Repressed                                                   |
| 24 | REACTOME_MITOTIC_METAPHASE_AND_ANAPHASE                          | -2.33                                      | 4                                            | 0                                            | 0                                     | 0                                            | Repressed                                                   |
| 25 | GO_NCRNA_PROCESSING                                              | -2.31                                      | 4                                            | 0                                            | 0                                     | 0                                            | Repressed                                                   |
| 26 | GO_SMALL_SUBUNIT_PROCESSOME                                      | -2.31                                      | 4                                            | 0                                            | 0                                     | 0                                            | Repressed                                                   |
| 27 | ODONNELL_TFRC_TARGETS_DN                                         | -2.31                                      | 4                                            | 0                                            | 0                                     | 0                                            | Repressed                                                   |
| 28 | MENSEN_MYC_TARGETS                                               | -2.30                                      | 4                                            | 0                                            | 1                                     | 0                                            | Repressed                                                   |
| 29 | MALONEY_RESPONSE_TO_17AAG_DN                                     | -2.29                                      | 4                                            | 0                                            | 0                                     | 0                                            | Repressed                                                   |
| 30 | REACTOME_THE_ROLE_OF_GTSE1_IN_G2_M_PROGRESSION_AFTER_G2_CHECKPO  | -2.29                                      | 4                                            | 0                                            | 0                                     | 0                                            | Repressed                                                   |
| 31 | SOTIRIOU_BREAST_CANCER_GRADE_1_VS_3_UP                           | -2.29                                      | 4                                            | 0                                            | 0                                     | 0                                            | Repressed                                                   |
| 32 | GO_RIBONUCLEOPROTEIN_COMPLEX_BIOGENESIS                          | -2.27                                      | 4                                            | 0                                            | 0                                     | 0                                            | Repressed                                                   |
| 33 | GO_RNA_LOCALIZATION                                              | -2.26                                      | 4                                            | 0                                            | 0                                     | 0                                            | Repressed                                                   |
| 34 | REICHERT_MITOSIS_LINQ_TARGETS                                    | -2.26                                      | 4                                            | 0                                            | 0                                     | 0                                            | Repressed                                                   |
| 35 | RHODES_UNDIFFERENTIATED_CANCER                                   | -2.26                                      | 4                                            | 0                                            | 0                                     | 0                                            | Repressed                                                   |
| 36 | KRIGE_RESPONSE_TO_TOSEDOSTAT_24HR_DN                             | -2.24                                      | 4                                            | 0                                            | 0                                     | 0                                            | Repressed                                                   |
| 37 | CSR_EARLY_UP.V1_UP                                               | -2.23                                      | 4                                            | 0                                            | 0                                     | 0                                            | Repressed                                                   |
| 38 | REACTOME_RESOLUTION_OF_SISTER_CHROMATID_COHESION                 | -2.23                                      | 4                                            | 0                                            | 0                                     | 0                                            | Repressed                                                   |
| 39 | FLORIO_NEOCORTEX_BASAL_RADIAL_GLIA_DN                            | -2.22                                      | 4                                            | 0                                            | 0                                     | 0                                            | Repressed                                                   |
| 40 | REACTOME_MITOTIC_SPINDLE_CHECKPOINT                              | -2.22                                      | 4                                            | 0                                            | 0                                     | 0                                            | Repressed                                                   |
| 41 | KRIGE_RESPONSE_TO_TOSEDOSTAT_6HR_DN                              | -2.21                                      | 4                                            | 0                                            | 0                                     | 0                                            | Repressed                                                   |
| 42 | PENG_RAPAMYCIN_RESPONSE_DN                                       | -2.21                                      | 4                                            | 0                                            | 0                                     | 0                                            | Repressed                                                   |
| 43 | GO_MATURATION_OF_SSU_RRNA                                        | -2.19                                      | 4                                            | 0                                            | 0                                     | 0                                            | Repressed                                                   |
| 44 | LEE_BMP2_TARGETS_DN                                              | -2.19                                      | 4                                            | 0                                            | 0                                     | 0                                            | Repressed                                                   |
| 45 | PID_AURORA_B_PATHWAY                                             | -2.19                                      | 4                                            | 0                                            | 0                                     | 0                                            | Repressed                                                   |
| 46 | REACTOME_METABOLISM_OF_RNA                                       | -2.19                                      | 4                                            | 0                                            | 0                                     | 0                                            | Repressed                                                   |
| 47 | GO_PROTEASOME_ACCESSORY_COMPLEX                                  | -2.18                                      | 4                                            | 0                                            | 0                                     | 0                                            | Repressed                                                   |
| 48 | ROSTY_CERVICAL_CANCER_PROLIFERATION_CLUSTER                      | -2.18                                      | 4                                            | 0                                            | 0                                     | 0                                            | Repressed                                                   |
| 49 | GO_90S_PRERIBOSOME                                               | -2.17                                      | 4                                            | 0                                            | 0                                     | 0                                            | Repressed                                                   |
| 50 | MANALO_HYPOXIA_DN                                                | -2.17                                      | 4                                            | 0                                            | 0                                     | 0                                            | Repressed                                                   |
| 51 | REACTOME_FBXL7_DOWN_REGULATES_AURKA_DURING_MITOTIC_ENTRY_AND_IN  | -2.17                                      | 4                                            | 0                                            | 0                                     | 0                                            | Repressed                                                   |
| 52 | FARMER_BREAST_CANCER_CLUSTER_2                                   | -2.16                                      | 4                                            | 0                                            | 0                                     | 0                                            | Repressed                                                   |
| 53 | GO_PRERIBOSOME_LARGE_SUBUNIT_PRECURSOR                           | -2.16                                      | 4                                            | 0                                            | 0                                     | 0                                            | Repressed                                                   |
| 54 | GO_MITOTIC_SPINDLE_ORGANIZATION                                  | -2.15                                      | 4                                            | 0                                            | 0                                     | 0                                            | Repressed                                                   |
| 55 | GO_RIBOSOMAL_SMALL_SUBUNIT_BIOGENESIS                            | -2.15                                      | 4                                            | 0                                            | 0                                     | 0                                            | Repressed                                                   |
| 56 | GO_SPINDLE_MIDZONE                                               | -2.15                                      | 4                                            | 0                                            | 0                                     | 0                                            | Repressed                                                   |
| 57 | REACTOME_DEGRADATION_OF_GLI1_BY_THE_PROTEASOME                   | -2.14                                      | 4                                            | 0                                            | 0                                     | 0                                            | Repressed                                                   |
| 58 | SCHLOSSER_MYC_TARGETS_REPRESSED_BY_SERUM                         | -2.14                                      | 4                                            | 0                                            | 0                                     | 0                                            | Repressed                                                   |
| 59 | WEI_MYCN_TARGETS_WITH_E_BOX                                      | -2.14                                      | 4                                            | 0                                            | 0                                     | 0                                            | Repressed                                                   |
| 60 | BOYALTY_LIVER_CANCER_SUBCLASS_G3_UP                              | -2.13                                      | 4                                            | 0                                            | 0                                     | 0                                            | Repressed                                                   |
| 61 | CAIRO_HEPATOBLASTOMA_CLASSES_UP                                  | -2.13                                      | 4                                            | 0                                            | 0                                     | 0                                            | Repressed                                                   |
| 62 | ELVIDGE_HIF1A_TARGETS_UP                                         | -2.13                                      | 4                                            | 0                                            | 0                                     | 0                                            | Repressed                                                   |
| 63 | GO_MATURATION_OF_SSU_RRNA_FROM_TRICISTRONIC_RRNA_TRANSCRIPT_SSU  | -2.13                                      | 4                                            | 0                                            | 0                                     | 0                                            | Repressed                                                   |
| 64 | ODONNELL_TARGETS_OF_MYC_AND_TFRC_DN                              | -2.13                                      | 4                                            | 0                                            | 0                                     | 0                                            | Repressed                                                   |
| 65 | WHITFIELD_CELL_CYCLE_M_G1                                        | -2.13                                      | 4                                            | 0                                            | 0                                     | 0                                            | Repressed                                                   |
| 66 | GO_RIBOSOMAL_LARGE_SUBUNIT_BIOGENESIS                            | -2.12                                      | 4                                            | 0                                            | 0                                     | 0                                            | Repressed                                                   |
| 67 | BIDUS_METASTASIS_UP                                              | -2.11                                      | 4                                            | 0                                            | 0                                     | 0                                            | Repressed                                                   |
| 68 | REACTOME_DEGRADATION_OF_BETA_CATENIN_BY_THE_DESTRUCTION_COMPLE   | -2.11                                      | 4                                            | 0                                            | 0                                     | 0                                            | Repressed                                                   |
| 69 | BURTON_ADIPOGENESIS_PEAK_AT_24HR                                 | -2.10                                      | 4                                            | 0                                            | 0                                     | 0                                            | Repressed                                                   |
| 70 | GO_SPINDLE_MICROTUBULE                                           | -2.10                                      | 4                                            | 0                                            | 0                                     | 0                                            | Repressed                                                   |
| 71 | PUJANA_CHEK2_PCC_NETWORK                                         | -2.10                                      | 4                                            | 0                                            | 0                                     | 0                                            | Repressed                                                   |
| 72 | REACTOME_REGULATION_OF_RUNX2_EXPRESSION_AND_ACTIVITY             | -2.10                                      | 4                                            | 0                                            | 0                                     | 0                                            | Repressed                                                   |
| 73 | REACTOME_RRNA_PROCESSING                                         | -2.10                                      | 4                                            | 0                                            | 0                                     | 0                                            | Repressed                                                   |
| 74 | GO_ESTABLISHMENT_OF_RNA_LOCALIZATION                             | -2.09                                      | 4                                            | 0                                            | 0                                     | 0                                            | Repressed                                                   |
| 75 | GO_MICROTUBULE_CYTOSKELETON_ORGANIZATION_INVOLVED_IN_MITOSIS     | -2.09                                      | 4                                            | 0                                            | 0                                     | 0                                            | Repressed                                                   |
| 76 | REACTOME_VIF_MEDIATED_DEGRADATION_OF_APOBEC3G                    | -2.09                                      | 4                                            | 0                                            | 0                                     | 0                                            | Repressed                                                   |
| 77 | CHANG_CYCLING_GENES                                              | -2.08                                      | 4                                            | 0                                            | 0                                     | 0                                            | Repressed                                                   |
| 78 | MOHANKUMAR_HOXA1_TARGETS_UP                                      | -2.08                                      | 4                                            | 0                                            | 0                                     | 0                                            | Repressed                                                   |
| 79 | REACTOME_CELLULAR_RESPONSE_TO_HYPOXIA                            | -2.08                                      | 4                                            | 0                                            | 0                                     | 0                                            | Repressed                                                   |
| 80 | REACTOME_RRNA_PROCESSING_IN_THE_NUCLEUS_AND_CYTOSOL              | -2.08                                      | 4                                            | 0                                            | 0                                     | 0                                            | Repressed                                                   |
| 81 | WONG_EMBRYONIC_STEM_CELL_CORE                                    | -2.08                                      | 4                                            | 0                                            | 0                                     | 0                                            | Repressed                                                   |
| 82 | GO_RNA_BINDING                                                   | -2.07                                      | 4                                            | 0                                            | 0                                     | 0                                            | Repressed                                                   |
| 83 | RHODES_CANCER_META_SIGNATURE                                     | -2.07                                      | 4                                            | 0                                            | 0                                     | 0                                            | Repressed                                                   |
| 84 | GO_ENDOPEPTIDASE_COMPLEX                                         | -2.06                                      | 4                                            | 0                                            | 0                                     | 0                                            | Repressed                                                   |
| 85 | GO_RNA_METABOLIC_PROCESS                                         | -2.06                                      | 4                                            | 0                                            | 0                                     | 0                                            | Repressed                                                   |
| 86 | SCIAN_CELL_CYCLE_TARGETS_OF_TP53_AND_TP73_DN                     | -2.06                                      | 4                                            | 0                                            | 0                                     | 0                                            | Repressed                                                   |
| 87 | SHEDDEN_LUNG_CANCER_POOR_SURVIVAL_A6                             | -2.06                                      | 4                                            | 0                                            | 0                                     | 0                                            | Repressed                                                   |
| 88 | VEGF_A_UP.V1_DN                                                  | -2.06                                      | 4                                            | 0                                            | 0                                     | 0                                            | Repressed                                                   |
| 89 | WONG_PROTEASOME_GENE_MODULE                                      | -2.06                                      | 4                                            | 0                                            | 0                                     | 0                                            | Repressed                                                   |
| 90 | CROONQUIST_IL6_DEPRIVATION_DN                                    | -2.05                                      | 4                                            | 0                                            | 0                                     | 0                                            | Repressed                                                   |
| 91 | CROONQUIST_NRAS_SIGNALING_DN                                     | -2.05                                      | 4                                            | 0                                            | 0                                     | 0                                            | Repressed                                                   |
| 92 | KANG_DOXORUBICIN_RESISTANCE_UP                                   | -2.05                                      | 4                                            | 0                                            | 0                                     | 0                                            | Repressed                                                   |
| 93 | KEGG_OOCYTE_MEIOSIS                                              | -2.05                                      | 4                                            | 0                                            | 0                                     | 0                                            | Repressed                                                   |
| 94 | REACTOME_CROSS_PRESENTATION_OF_SOLUBLE_EXOGENOUS_ANTIGENS_ENDO   | -2.05                                      | 4                                            | 0                                            | 0                                     | 0                                            | Repressed                                                   |
| 95 | REACTOME_NEGATIVE_REGULATION_OF_NOTCH4_SIGNALING                 | -2.05                                      | 4                                            | 0                                            | 0                                     | 0                                            | Repressed                                                   |
| 96 | ZHOU_CELL_CYCLE_GENES_IN_IR_RESPONSE_24HR                        | -2.05                                      | 4                                            | 0                                            | 0                                     | 0                                            | Repressed                                                   |
| 97 | GO_MATURATION_OF_LSU_RRNA                                        | -2.04                                      | 4                                            | 0                                            | 0                                     | 0                                            | Repressed                                                   |

|     |                                                                   |       |      |   |   |   |           |
|-----|-------------------------------------------------------------------|-------|------|---|---|---|-----------|
| 98  | HALLMARK_G2M_CHECKPOINT                                           | -2.04 | 4    | 0 | 0 | 0 | Repressed |
| 99  | HOFFMANN_LARGE_TO_SMALL_PRE_BII_LYMPHOCYTE_UP                     | -2.04 | 4    | 0 | 0 | 0 | Repressed |
| 100 | LY_AGING_MIDDLE_DN                                                | -2.04 | 4    | 0 | 0 | 0 | Repressed |
| 101 | LY_AGING_OLD_DN                                                   | -2.04 | 4    | 0 | 0 | 0 | Repressed |
| 102 | REACTOME_PROCESSING_OF_CAPPED_INTRON_CONTAINING_PRE_MRNA          | -2.04 | 4    | 0 | 0 | 0 | Repressed |
| 103 | REACTOME_REGULATION_OF_APOPTOSIS                                  | -2.04 | 4    | 0 | 0 | 0 | Repressed |
| 104 | YU_MYC_TARGETS_UP                                                 | -2.04 | 4    | 0 | 0 | 0 | Repressed |
| 105 | BASAKI_YBX1_TARGETS_UP                                            | -2.03 | 4    | 0 | 0 | 0 | Repressed |
| 106 | GO_MOLECULAR_CARRIER_ACTIVITY                                     | -2.03 | 4    | 0 | 0 | 0 | Repressed |
| 107 | GO_SMALL_NUCLEOLAR_RIBONUCLEOPROTEIN_COMPLEX                      | -2.03 | 4    | 0 | 0 | 0 | Repressed |
| 108 | MOHANKUMAR_TLX1_TARGETS_UP                                        | -2.03 | 4    | 0 | 0 | 0 | Repressed |
| 109 | PID_MYC_ACTIV_PATHWAY                                             | -2.03 | 4    | 0 | 1 | 0 | Repressed |
| 110 | GO_CATALYTIC_ACTIVITY_ACTING_ON_A_TRNA                            | -2.02 | 4    | 0 | 0 | 0 | Repressed |
| 111 | GO_NUCLEAR_EXPORT                                                 | -2.02 | 4    | 0 | 0 | 0 | Repressed |
| 112 | GO_NUCLEAR_PORE                                                   | -2.02 | 4    | 0 | 0 | 0 | Repressed |
| 113 | MONNIER_POSTRADIATION_TUMOR_ESCAPE_UP                             | -2.02 | 4    | 0 | 0 | 0 | Repressed |
| 114 | NAKAMURA_TUMOR_ZONE_PERIPHERAL_VS_CENTRAL_UP                      | -2.02 | 4    | 0 | 0 | 0 | Repressed |
| 115 | VECCHI_GASTRIC_CANCER_EARLY_UP                                    | -2.02 | 4    | 0 | 0 | 0 | Repressed |
| 116 | GO_NLS_BEARING_PROTEIN_IMPORT_INTO_NUCLEUS                        | -2.01 | 4    | 0 | 0 | 0 | Repressed |
| 117 | GO_PROTEASOME_REGULATORY_PARTICLE_BASE_SUBCOMPLEX                 | -2.01 | 4    | 0 | 0 | 0 | Repressed |
| 118 | GO_TRNA_METABOLIC_PROCESS                                         | -2.01 | 4    | 1 | 0 | 0 | Repressed |
| 119 | GRAHAM_CML_DIVIDING_VS_NORMAL QUIESCENT_UP                        | -2.01 | 4    | 0 | 0 | 0 | Repressed |
| 120 | MORI_LARGE_PRE_BII_LYMPHOCYTE_UP                                  | -2.01 | 4    | 0 | 0 | 0 | Repressed |
| 121 | PID_AURORA_A_PATHWAY                                              | -2.01 | 4    | 0 | 0 | 0 | Repressed |
| 122 | REACTOME_HSP90_CHAPERONE_CYCLE_FOR_STEROID_HORMONE_RECEPTORS      | -2.01 | 4    | 0 | 0 | 0 | Repressed |
| 123 | GO_POSITIVE_REGULATION_OF_TELOMERASE_RNA_LOCALIZATION_TO_CAJAL_BC | -2.00 | 4    | 0 | 0 | 0 | Repressed |
| 124 | GO_RNA_EXPORT_FROM_NUCLEUS                                        | -2.00 | 4    | 0 | 0 | 0 | Repressed |
| 125 | REACTOME_AUF1_HNRNP_D0_BINDS_AND_DESTABILIZES_MRNA                | -2.00 | 4    | 0 | 0 | 0 | Repressed |
| 126 | SU_TESTIS                                                         | -2.00 | 4    | 0 | 0 | 0 | Repressed |
| 127 | ZHAN_MULTIPLE_MYELOMA_PR_UP                                       | -2.00 | 4    | 0 | 0 | 0 | Repressed |
| 128 | GO_NUCLEAR_TRANSPORT                                              | -1.99 | 4    | 0 | 0 | 0 | Repressed |
| 129 | GO_NUCLEOCYTOPLASMIC_CARRIER_ACTIVITY                             | -1.99 | 4    | 0 | 0 | 0 | Repressed |
| 130 | GO_PEPTIDASE_COMPLEX                                              | -1.99 | 4    | 0 | 0 | 0 | Repressed |
| 131 | KEGG_PROTEASOME                                                   | -1.98 | 4    | 0 | 0 | 0 | Repressed |
| 132 | KIM_MYC_AMPLIFICATION_TARGETS_UP                                  | -1.98 | 4    | 0 | 0 | 0 | Repressed |
| 133 | REACTOME_DOWNSTREAM_SIGNALING_EVENTS_OF_B_CELL_RECEPTOR_BCR       | -1.98 | 4    | 0 | 0 | 0 | Repressed |
| 134 | REACTOME_GLYCOLYSIS                                               | -1.98 | 4    | 0 | 0 | 0 | Repressed |
| 135 | REACTOME_RHO_GTPASES_ACTIVATE_FORMINS                             | -1.98 | 4    | 0 | 0 | 0 | Repressed |
| 136 | REACTOME_SIGNALING_BY_THE_B_CELL_RECEPTOR_BCR                     | -1.98 | 4    | 0 | 0 | 0 | Repressed |
| 137 | REACTOME_TRNA_AMINOACYLATION                                      | -1.98 | 4    | 0 | 0 | 0 | Repressed |
| 138 | RODRIGUES_THYROID_CARCINOMA_ANAPLASTIC_UP                         | -1.98 | 4    | 0 | 0 | 0 | Repressed |
| 139 | SCHLOSSER_MYC_TARGETS_AND_SERUM_RESPONSE_UP                       | -1.98 | 4    | 0 | 0 | 0 | Repressed |
| 140 | GO_AMINO_ACID_ACTIVATION                                          | -1.97 | 4    | 0 | 0 | 0 | Repressed |
| 141 | GO_NUCLEOLAR_PART                                                 | -1.97 | 4    | 0 | 0 | 0 | Repressed |
| 142 | GO_TELOMERASE_RNA_LOCALIZATION                                    | -1.97 | 4    | 0 | 0 | 0 | Repressed |
| 143 | HORIUCHI_WTAP_TARGETS_DN                                          | -1.97 | 4    | 0 | 0 | 0 | Repressed |
| 144 | REACTOME_ACTIVATION_OF_NF_KAPPAB_IN_B_CELLS                       | -1.97 | 4    | 0 | 0 | 0 | Repressed |
| 145 | REACTOME_M_PHASE                                                  | -1.97 | 4    | 0 | 0 | 0 | Repressed |
| 146 | REACTOME_REGULATION_OF_RAS_BY_GAPS                                | -1.97 | 4    | 0 | 0 | 0 | Repressed |
| 147 | SCHUHMACHER_MYC_TARGETS_UP                                        | -1.97 | 4    | 0 | 0 | 0 | Repressed |
| 148 | SHEPARD_CRUSH_AND_BURN_MUTANT_DN                                  | -1.97 | 4    | 0 | 0 | 0 | Repressed |
| 149 | ANDERSEN_CHOLANGIOCARCINOMA_CLASS2                                | -1.96 | 4    | 0 | 0 | 0 | Repressed |
| 150 | BURTON_ADIPOGENESIS_4                                             | -1.96 | 4    | 0 | 0 | 0 | Repressed |
| 151 | FOURNIER_ACINAR_DEVELOPMENT_LATE_2                                | -1.96 | 4    | 0 | 0 | 0 | Repressed |
| 152 | REACTOME_APC_CDC20_MEDIATED_DEGRADATION_OF_NEK2A                  | -1.96 | 4    | 0 | 0 | 0 | Repressed |
| 153 | REACTOME_DEGRADATION_OF_AXIN                                      | -1.96 | 4    | 0 | 0 | 0 | Repressed |
| 154 | REACTOME_HEDGEHOG_ON_STATE                                        | -1.96 | 4    | 0 | 0 | 0 | Repressed |
| 155 | REACTOME_MRNA_SPLICING                                            | -1.96 | 4    | 0 | 0 | 0 | Repressed |
| 156 | DODD_NASOPHARYNGEAL_CARCINOMA_DN                                  | -1.95 | 4    | 0 | 0 | 0 | Repressed |
| 157 | ELVIDGE_HIF1A_AND_HIF2A_TARGETS_UP                                | -1.95 | 4    | 0 | 0 | 0 | Repressed |
| 158 | GO_LIGASE_ACTIVITY_FORMING_CARBON_OXYGEN_BONDS                    | -1.95 | 4    | 0 | 0 | 0 | Repressed |
| 159 | GO_MATURATION_OF_LSU_RRNA_FROM_TRICISTRONIC_RRNA_TRANSCRIPT_SSU   | -1.95 | 4    | 0 | 0 | 0 | Repressed |
| 160 | KONG_E2F3_TARGETS                                                 | -1.95 | 4    | 0 | 0 | 0 | Repressed |
| 161 | REACTOME_DEGRADATION_OF_DVL                                       | -1.95 | 4    | 0 | 0 | 0 | Repressed |
| 162 | REACTOME_HIV_INFECTION                                            | -1.95 | 4    | 0 | 0 | 0 | Repressed |
| 163 | REACTOME_HOST_INTERACTIONS_OF_HIV_FACTORS                         | -1.95 | 4    | 0 | 0 | 0 | Repressed |
| 164 | REACTOME_REGULATION_OF_PTEN_STABILITY_AND_ACTIVITY                | -1.95 | 4    | 0 | 0 | 0 | Repressed |
| 165 | BIOCARTA_RANMS_PATHWAY                                            | -1.95 | 2.68 | 0 | 0 | 0 | Repressed |
| 166 | GO_REGULATION_OF_PROTEIN_LOCALIZATION_TO_CHROMOSOME_TELOMERIC_R   | -1.95 | 2.34 | 0 | 0 | 0 | Repressed |
| 167 | GO_CATALYTIC_ACTIVITY_ACTING_ON_RNA                               | -1.94 | 4    | 0 | 0 | 0 | Repressed |
| 168 | GO_SPINDLE_ORGANIZATION                                           | -1.94 | 4    | 0 | 0 | 0 | Repressed |
| 169 | WILLIAMS_ESR1_TARGETS_UP                                          | -1.94 | 4    | 0 | 0 | 0 | Repressed |
| 170 | WINNENINCKX_MELANOMA_METASTASIS_UP                                | -1.94 | 4    | 0 | 0 | 0 | Repressed |
| 171 | GAVIN_FOXP3_TARGETS_CLUSTER_P6                                    | -1.93 | 4    | 0 | 0 | 0 | Repressed |
| 172 | GO_OTHER_ORGANISM                                                 | -1.93 | 4    | 0 | 0 | 0 | Repressed |
| 173 | GO_PROTEIN_IMPORT_INTO_MITOCHONDRIAL_MATRIX                       | -1.93 | 4    | 0 | 0 | 0 | Repressed |
| 174 | GO_SPINDLE                                                        | -1.93 | 4    | 0 | 0 | 0 | Repressed |
| 175 | GO_SPINDLE_POLE                                                   | -1.93 | 4    | 0 | 0 | 0 | Repressed |
| 176 | REACTOME_HEDGEHOG_OFF_STATE                                       | -1.93 | 4    | 0 | 0 | 0 | Repressed |
| 177 | REACTOME_METABOLISM_OF_NON_CODING_RNA                             | -1.93 | 4    | 0 | 0 | 0 | Repressed |
| 178 | REACTOME_REGULATION_OF_RUNX3_EXPRESSION_AND_ACTIVITY              | -1.93 | 4    | 0 | 0 | 0 | Repressed |
| 179 | REACTOME_PHOSPHORYLATION_OF_THE_APC_C                             | -1.93 | 2.62 | 0 | 0 | 0 | Repressed |
| 180 | CHIANG_LIVER_CANCER_SUBCLASS_PROLIFERATION_UP                     | -1.92 | 4    | 0 | 0 | 0 | Repressed |
| 181 | GO_MRNA_TRANSPORT                                                 | -1.92 | 4    | 0 | 0 | 0 | Repressed |
| 182 | GO_RAN_GTPASE_BINDING                                             | -1.92 | 4    | 0 | 0 | 0 | Repressed |
| 183 | GO_REGULATION_OF_CHROMOSOME_SEGREGATION                           | -1.92 | 4    | 0 | 0 | 0 | Repressed |
| 184 | GO_RNA_SPLICING_VIA_TRANSESTERIFICATION_REACTIONS                 | -1.92 | 4    | 0 | 0 | 0 | Repressed |
| 185 | PUFFE_INVASION_INHIBITED_BY_ASCITES_UP                            | -1.92 | 4    | 0 | 0 | 0 | Repressed |
| 186 | REACTOME_NUCLEAR_PORE_COMPLEX_NPC_DISASSEMBLY                     | -1.92 | 4    | 0 | 0 | 0 | Repressed |
| 187 | REACTOME_UCH_PROTEINASES                                          | -1.92 | 4    | 0 | 0 | 0 | Repressed |
| 188 | REACTOME_VIRAL_MESSENGER_RNA_SYNTHESIS                            | -1.92 | 4    | 0 | 0 | 0 | Repressed |
| 189 | GO_PRERIBOSOME_SMALL_SUBUNIT_PRECURSOR                            | -1.92 | 2.64 | 0 | 0 | 0 | Repressed |
| 190 | REACTOME_APC_C_CDC20_MEDIATED_DEGRADATION_OF_CYCLIN_B             | -1.92 | 2.59 | 0 | 0 | 0 | Repressed |
| 191 | REACTOME_INTERACTIONS_OF_REV_WITH_HOST_CELLULAR_PROTEINS          | -1.92 | 2.56 | 0 | 0 | 0 | Repressed |
| 192 | BERENIENO_TRANSFORMED_BY_RHOA_UP                                  | -1.91 | 4    | 0 | 0 | 0 | Repressed |
| 193 | FERREIRA_EWINGS_SARCOMA_UNSTABLE_VS_STABLE_UP                     | -1.91 | 4    | 0 | 0 | 0 | Repressed |
| 194 | FURUKAWA_DUSP6_TARGETS_PCI35_DN                                   | -1.91 | 4    | 0 | 0 | 0 | Repressed |
| 195 | GO_DOUBLE_STRANDED_RNA_BINDING                                    | -1.91 | 4    | 0 | 0 | 0 | Repressed |
| 196 | GO_REGULATION_OF_CHROMOSOME_SEPARATION                            | -1.91 | 4    | 0 | 0 | 0 | Repressed |
| 197 | GO_REGULATION_OF_TRANSLATIONAL_ELONGATION                         | -1.91 | 4    | 0 | 0 | 0 | Repressed |
| 198 | REACTOME_MAPK6_MAPK4_SIGNALING                                    | -1.91 | 4    | 0 | 0 | 0 | Repressed |
| 199 | REACTOME_STABILIZATION_OF_P53                                     | -1.91 | 4    | 0 | 0 | 0 | Repressed |
| 200 | REACTOME_SUMOYLATION_OF_DNA_REPLICATION_PROTEINS                  | -1.91 | 4    | 0 | 0 | 0 | Repressed |
| 201 | GO_RIBONUCLEOPROTEIN_COMPLEX_BINDING                              | -1.90 | 4    | 0 | 0 | 0 | Repressed |
| 202 | GO_SCF_DEPENDENT_PROTEASOMAL_UBIQUITIN_DEPENDENT_PROTEIN_CATABOL  | -1.90 | 4    | 0 | 0 | 0 | Repressed |
| 203 | LEE_EARLY_T_LYMPHOCYTE_UP                                         | -1.90 | 4    | 0 | 0 | 0 | Repressed |
| 204 | TARTE_PLASMA_CELL_VS_PLASMABLAST_DN                               | -1.90 | 4    | 0 | 0 | 0 | Repressed |
| 205 | TIEN_INTESTINE_PROBIOTICS_24HR_UP                                 | -1.90 | 4    | 0 | 0 | 0 | Repressed |
| 206 | REACTOME_MITOTIC_TELOPHASE_CYTOKINESIS                            | -1.90 | 2.64 | 0 | 0 | 0 | Repressed |

|     |                                                                    |       |      |   |   |   |           |
|-----|--------------------------------------------------------------------|-------|------|---|---|---|-----------|
| 207 | BHAT_ESR1_TARGETS_NOT_VIA_AKT1_UP                                  | -1.89 | 4    | 0 | 0 | 0 | Repressed |
| 208 | CHAUHAN_RESPONSE_TO_METHOXYESTRADIOL_UP                            | -1.89 | 4    | 0 | 0 | 0 | Repressed |
| 209 | GO_CHROMOSOME_CENTROMERIC_REGION                                   | -1.89 | 4    | 0 | 0 | 0 | Repressed |
| 210 | KINSEY_TARGETS_OF_EWSR1_FLJ1_FUSION_UP                             | -1.89 | 4    | 0 | 0 | 0 | Repressed |
| 211 | REACTOME_RNA_POLYMERASE_II_TRANSCRIPTION_PRE_INITIATION_AND_PROMOT | -1.89 | 4    | 0 | 0 | 0 | Repressed |
| 212 | REACTOME_TRNA_PROCESSING                                           | -1.89 | 4    | 0 | 0 | 0 | Repressed |
| 213 | GO_TRNA_TRANSPORT                                                  | -1.89 | 2.56 | 0 | 0 | 0 | Repressed |
| 214 | GO_HEMATOPOIETIC_STEM_CELL_DIFFERENTIATION                         | -1.88 | 4    | 0 | 0 | 0 | Repressed |
| 215 | GO_MITOTIC_SPINDLE_ASSEMBLY                                        | -1.88 | 4    | 0 | 0 | 0 | Repressed |
| 216 | GO_NCRNA_TRANSCRIPTION                                             | -1.88 | 4    | 0 | 0 | 0 | Repressed |
| 217 | MARTINEZ_RESPONSE_TO TRABECTEDIN_DN                                | -1.88 | 4    | 0 | 0 | 0 | Repressed |
| 218 | REACTOME_PCP_CE_PATHWAY                                            | -1.88 | 4    | 0 | 0 | 0 | Repressed |
| 219 | GO_PROTEIN_K11_LINKED_UBIQUITINATION                               | -1.88 | 2.59 | 0 | 0 | 0 | Repressed |
| 220 | GO_TRNA_MODIFICATION                                               | -1.88 | 2.51 | 0 | 0 | 0 | Repressed |
| 221 | GENTILE_UV_RESPONSE_CLUSTER_D4                                     | -1.87 | 4    | 0 | 0 | 0 | Repressed |
| 222 | GENTILE_UV_RESPONSE_CLUSTER_D5                                     | -1.87 | 4    | 0 | 0 | 0 | Repressed |
| 223 | GO_CONDENSED_CHROMOSOME_OUTER_KINETOCHORE                          | -1.87 | 4    | 0 | 0 | 0 | Repressed |
| 224 | GO_NUCLEOBASE_CONTAINING_COMPOUND_TRANSPORT                        | -1.87 | 4    | 0 | 0 | 0 | Repressed |
| 225 | GO_REGULATION_OF_SISTER_CHROMATID_SEGREGATION                      | -1.87 | 4    | 0 | 0 | 0 | Repressed |
| 226 | GREENBAUM_E2A_TARGETS_UP                                           | -1.87 | 4    | 0 | 0 | 0 | Repressed |
| 227 | REACTOME_CDK_MEDIATED_PHOSPHORYLATION_AND_REMOVAL_OF_CDC6          | -1.87 | 4    | 0 | 0 | 0 | Repressed |
| 228 | REACTOME_FCER1_MEDIATED_NF_KB_ACTIVATION                           | -1.87 | 4    | 0 | 0 | 0 | Repressed |
| 229 | REACTOME_RNA_POLYMERASE_II_PRE_TRANSCRIPTION_EVENTS                | -1.87 | 4    | 0 | 0 | 0 | Repressed |
| 230 | REACTOME_CYTOSOLIC_TRNA_AMINOACYLATION                             | -1.87 | 2.6  | 0 | 0 | 0 | Repressed |
| 231 | GO_MITOCHONDRIAL_RNA_METABOLIC_PROCESS                             | -1.86 | 4    | 0 | 0 | 0 | Repressed |
| 232 | GO_MITOTIC_NUCLEAR_ENVELOPE_DISASSEMBLY                            | -1.86 | 4    | 0 | 0 | 0 | Repressed |
| 233 | GO_MITOTIC_SISTER_CHROMATID_SEGREGATION                            | -1.86 | 4    | 0 | 0 | 0 | Repressed |
| 234 | GO_MITOTIC_SPINDLE                                                 | -1.86 | 4    | 0 | 0 | 0 | Repressed |
| 235 | GRADE_METASTASIS_DN                                                | -1.86 | 4    | 0 | 0 | 0 | Repressed |
| 236 | KOBAYASHI_EGFR_SIGNALING_24HR_DN                                   | -1.86 | 4    | 0 | 0 | 0 | Repressed |
| 237 | REACTOME_RNA_POLYMERASE_II_TRANSCRIBES_SNRNA_GENES                 | -1.86 | 4    | 0 | 0 | 0 | Repressed |
| 238 | SHEPARD_BMYB_TARGETS                                               | -1.86 | 4    | 0 | 0 | 0 | Repressed |
| 239 | CROMER_METASTASIS_DN                                               | -1.86 | 2.54 | 0 | 0 | 0 | Repressed |
| 240 | DASU_IL6_SIGNALING_SCAR_UP                                         | -1.85 | 4    | 0 | 0 | 0 | Repressed |
| 241 | GO_PROTEIN_IMPORT                                                  | -1.85 | 4    | 0 | 0 | 0 | Repressed |
| 242 | GO_SISTER_CHROMATID_SEGREGATION                                    | -1.85 | 4    | 0 | 0 | 0 | Repressed |
| 243 | KEGG_SPLICEOSOME                                                   | -1.85 | 4    | 0 | 0 | 0 | Repressed |
| 244 | MUELLER_PLURINET                                                   | -1.85 | 4    | 0 | 0 | 0 | Repressed |
| 245 | REACTOME_DOWNSTREAM_TCR_SIGNALING                                  | -1.85 | 4    | 0 | 0 | 0 | Repressed |
| 246 | REACTOME_NUCLEAR_IMPORT_OF_REV_PROTEIN                             | -1.85 | 4    | 0 | 0 | 0 | Repressed |
| 247 | REACTOME_TRANSCRIPTIONAL_REGULATION_BY_RUNX2                       | -1.85 | 4    | 0 | 0 | 0 | Repressed |
| 248 | RICKMAN_TUMOR_DIFFERENTIATED_WELL_VS_MODERATELY_DN                 | -1.85 | 4    | 0 | 0 | 0 | Repressed |
| 249 | GO_CHAPERONE_COMPLEX                                               | -1.85 | 2.63 | 0 | 0 | 0 | Repressed |
| 250 | BURTON_ADIPOGENESIS_3                                              | -1.85 | 2.5  | 0 | 0 | 0 | Repressed |
| 251 | DAIRKEE_CANCER_PRONE_RESPONSE_BPA                                  | -1.84 | 4    | 0 | 0 | 0 | Repressed |
| 252 | GO_REGULATION_OF_CELLULAR_RESPONSE_TO_HEAT                         | -1.84 | 4    | 0 | 0 | 0 | Repressed |
| 253 | GO_SPLICEOSOMAL_SNRNP_ASSEMBLY                                     | -1.84 | 4    | 0 | 0 | 0 | Repressed |
| 254 | GO_TRANSLATIONAL_TERMINATION                                       | -1.84 | 4    | 0 | 0 | 0 | Repressed |
| 255 | PID_PLK1_PATHWAY                                                   | -1.84 | 4    | 0 | 0 | 0 | Repressed |
| 256 | REACTOME_ASYMMETRIC_LOCALIZATION_OF_PCP_PROTEINS                   | -1.84 | 4    | 0 | 0 | 0 | Repressed |
| 257 | REACTOME_CONVERSION_FROM_APC_C.CDC20_TO_APC_C.CDH1_IN_LATE_ANAPH   | -1.84 | 4    | 0 | 0 | 0 | Repressed |
| 258 | REACTOME_MRNA_SPLICING_MINOR_PATHWAY                               | -1.84 | 4    | 0 | 0 | 0 | Repressed |
| 259 | LEE_INTRATHYMIC_T_PROGENITOR                                       | -1.84 | 2.65 | 0 | 0 | 0 | Repressed |
| 260 | NIKOLSKY_BREAST_CANCER_14Q22_AMPLICON                              | -1.84 | 2.65 | 0 | 0 | 0 | Repressed |
| 261 | BOSCO_EPITHELIAL_DIFFERENTIATION_MODULE                            | -1.84 | 2.64 | 0 | 0 | 0 | Repressed |
| 262 | GO_REGULATION_OF_RIBOSOME_BIOGENESIS                               | -1.84 | 2.62 | 0 | 0 | 0 | Repressed |
| 263 | GO_TRANSLATION_INITIATION_FACTOR_ACTIVITY                          | -1.84 | 2.56 | 0 | 0 | 0 | Repressed |
| 264 | PID_ILK_PATHWAY                                                    | -1.84 | 2.56 | 0 | 0 | 0 | Repressed |
| 265 | ELVIDGE_HYPOXIA_BY_DMOG_DN                                         | -1.83 | 4    | 0 | 0 | 0 | Repressed |
| 266 | GO_METAPHASE_ANAPHASE_TRANSITION_OF_CELL_CYCLE                     | -1.83 | 4    | 0 | 0 | 1 | Repressed |
| 267 | JUBAN_TARGETS_OF_SPH1_AND_FLH1_DN                                  | -1.83 | 4    | 0 | 0 | 0 | Repressed |
| 268 | KEGG_AMINOACYL_TRNA_BIOSYNTHESIS                                   | -1.83 | 4    | 1 | 0 | 0 | Repressed |
| 269 | KUMAMOTO_RESPONSE_TO_NUTLIN_3A_DN                                  | -1.83 | 4    | 0 | 0 | 0 | Repressed |
| 270 | PUJANA_BRCA1_PCC_NETWORK                                           | -1.83 | 4    | 0 | 0 | 0 | Repressed |
| 271 | REACTOME_CELL_CYCLE_CHECKPOINTS                                    | -1.83 | 4    | 0 | 0 | 0 | Repressed |
| 272 | REACTOME_COOPERATION_OF_PDCL_PHLP1_AND_TRIC_CCT_IN_G_PROTEIN_BET   | -1.83 | 4    | 0 | 0 | 0 | Repressed |
| 273 | REACTOME_SIGNALING_BY_HEDGEHOG                                     | -1.83 | 4    | 0 | 0 | 0 | Repressed |
| 274 | REACTOME_TRANSCRIPTION_OF_THE_HIV_GENOME                           | -1.83 | 4    | 0 | 0 | 0 | Repressed |
| 275 | REACTOME_TRANSPORT_OF_THE_SLBP_DEPENDANT_MATURE_MRNA               | -1.83 | 4    | 0 | 0 | 0 | Repressed |
| 276 | SESTO_RESPONSE_TO_UV_C0                                            | -1.83 | 4    | 0 | 0 | 0 | Repressed |
| 277 | GO_PROTEIN_LOCALIZATION_TO_NUCLEOPLASM                             | -1.83 | 2.66 | 0 | 0 | 0 | Repressed |
| 278 | LOPEZ_MESOTELIOMA_SURVIVAL_TIME_UP                                 | -1.83 | 2.66 | 0 | 0 | 0 | Repressed |
| 279 | GO_POSITIVE_REGULATION_OF_PPTIDYL_THREONINE_PHOSPHORYLATION        | -1.83 | 2.62 | 0 | 0 | 0 | Repressed |
| 280 | REACTOME_TRANSCRIPTIONAL_ACTIVATION_OF_MITOCHONDRIAL_BIOGENESIS    | -1.83 | 2.52 | 0 | 0 | 0 | Repressed |
| 281 | GO_NUCLEOLUS                                                       | -1.82 | 4    | 0 | 0 | 0 | Repressed |
| 282 | GO_RIBONUCLEOPROTEIN_COMPLEX                                       | -1.82 | 4    | 0 | 0 | 0 | Repressed |
| 283 | REACTOME_HOST_INTERACTIONS_WITH_INFLUENZA_FACTORS                  | -1.82 | 4    | 0 | 0 | 0 | Repressed |
| 284 | REACTOME_RUNX1_REGULATES_TRANSCRIPTION_OF_GENES_INVOLVED_IN_DIFFE  | -1.82 | 4    | 0 | 0 | 0 | Repressed |
| 285 | WHITEFORD_PEDIATRIC_CANCER_MARKERS                                 | -1.82 | 4    | 0 | 0 | 0 | Repressed |
| 286 | WHITFIELD_CELL_CYCLE_LITERATURE                                    | -1.82 | 4    | 0 | 0 | 0 | Repressed |
| 287 | FINETTI_BREAST_CANCER_KINOME_RED                                   | -1.82 | 2.63 | 0 | 0 | 0 | Repressed |
| 288 | GO_RNA_CAP_BINDING                                                 | -1.82 | 2.6  | 0 | 0 | 0 | Repressed |
| 289 | KEGG_RNA_POLYMERASE                                                | -1.82 | 2.6  | 0 | 0 | 0 | Repressed |
| 290 | REACTOME_TRANSPORT_OF_MATURE_MRNAS_DERIVED_FROM_INTRONLESS_TR      | -1.82 | 2.58 | 0 | 0 | 0 | Repressed |
| 291 | GO_NCRNA_EXPORT_FROM_NUCLEUS                                       | -1.82 | 2.56 | 0 | 0 | 0 | Repressed |
| 292 | GO_TBP_CLASS_PROTEIN_BINDING                                       | -1.82 | 2.32 | 0 | 0 | 0 | Repressed |
| 293 | BENPORATH_PROLIFERATION                                            | -1.81 | 4    | 0 | 0 | 0 | Repressed |
| 294 | BIOCARTA_EGFR_SMRT_PATHWAY                                         | -1.81 | 4    | 0 | 0 | 0 | Repressed |
| 295 | BLALOCK_ALZHEIMERS_DISEASE_INCIPENT_DN                             | -1.81 | 4    | 0 | 0 | 0 | Repressed |
| 296 | DANG_MYC_TARGETS_UP                                                | -1.81 | 4    | 0 | 1 | 0 | Repressed |
| 297 | GO_MITOCHONDRIAL_RNA_PROCESSING                                    | -1.81 | 4    | 0 | 0 | 0 | Repressed |
| 298 | GO_NUCLEOTIDYLTRANSFERASE_ACTIVITY                                 | -1.81 | 4    | 0 | 0 | 0 | Repressed |
| 299 | GO_REGULATION_OF_MRNA_CATABOLIC_PROCESS                            | -1.81 | 4    | 0 | 0 | 0 | Repressed |
| 300 | GO_RNA_POLYMERASE_ACTIVITY                                         | -1.81 | 4    | 0 | 0 | 0 | Repressed |
| 301 | GO_SIGNAL_SEQUENCE_BINDING                                         | -1.81 | 4    | 0 | 0 | 0 | Repressed |
| 302 | GO_SISTER_CHROMATID_COHESION                                       | -1.81 | 4    | 0 | 0 | 0 | Repressed |
| 303 | LE_EGR2_TARGETS_UP                                                 | -1.81 | 4    | 0 | 0 | 0 | Repressed |
| 304 | MILI_PSEUDOPODIA_HAPTOTAXIS_UP                                     | -1.81 | 4    | 0 | 0 | 0 | Repressed |
| 305 | ONDER_CDH1_TARGETS_1_DN                                            | -1.81 | 4    | 0 | 0 | 0 | Repressed |
| 306 | REACTOME_DECTIN_1_MEDIATED_NONCANONICAL_NF_KB_SIGNALING            | -1.81 | 4    | 0 | 0 | 0 | Repressed |
| 307 | REACTOME_MHC_CLASS_II_ANTIGEN_PRESENTATION                         | -1.81 | 4    | 0 | 0 | 0 | Repressed |
| 308 | VISALA_RESPONSE_TO_HEAT_SHOCK_AND_AGING_DN                         | -1.81 | 4    | 0 | 0 | 0 | Repressed |
| 309 | ZHANG_TLX_TARGETS_36HR_DN                                          | -1.81 | 4    | 0 | 0 | 0 | Repressed |
| 310 | GO_SNORNA_BINDING                                                  | -1.81 | 2.61 | 0 | 0 | 0 | Repressed |
| 311 | GO_CATALYTIC_STEP_2_SPLICEOSOME                                    | -1.80 | 4    | 0 | 0 | 0 | Repressed |
| 312 | GO_CHROMOSOME_SEPARATION                                           | -1.80 | 4    | 0 | 0 | 0 | Repressed |
| 313 | GO_CYTOSOLIC_PROTEASOME_COMPLEX                                    | -1.80 | 4    | 0 | 0 | 0 | Repressed |
| 314 | GO_REGULATION_OF_CELLULAR_AMINO_ACID_METABOLIC_PROCESS             | -1.80 | 4    | 0 | 0 | 0 | Repressed |
| 315 | GO_REGULATION_OF_MEIOTIC_NUCLEAR_DIVISION                          | -1.80 | 4    | 0 | 0 | 0 | Repressed |

|     |                                                                    |       |      |   |   |   |           |
|-----|--------------------------------------------------------------------|-------|------|---|---|---|-----------|
| 316 | GO_TRNA_PROCESSING                                                 | -1.80 | 4    | 0 | 0 | 0 | Repressed |
| 317 | HALLMARK_MITOTIC_SPINDLE                                           | -1.80 | 4    | 0 | 0 | 0 | Repressed |
| 318 | REACTOME_INHIBITION_OF_THE_PROTEOLYTIC_ACTIVITY_OF_APC_C_REQUIRED  | -1.80 | 4    | 0 | 0 | 0 | Repressed |
| 319 | GO_REGULATION_OF_ATTACHMENT_OF_SPINDLE_MICROTUBULES_TO_KINETOCH    | -1.80 | 2.63 | 0 | 0 | 0 | Repressed |
| 320 | KARAKAS_TGFB1_SIGNALING                                            | -1.80 | 2.63 | 0 | 0 | 0 | Repressed |
| 321 | GO_REGULATION_OF_DNA_METHYLATION                                   | -1.80 | 1.8  | 0 | 0 | 0 | Repressed |
| 322 | GO_DNA_TEMPLATED_TRANSCRIPTION_TERMINATION                         | -1.79 | 4    | 0 | 0 | 0 | Repressed |
| 323 | GO_KINETOCHORE                                                     | -1.79 | 4    | 0 | 0 | 0 | Repressed |
| 324 | GO_POSITIVE_REGULATION_OF_UBIQUITIN_PROTEIN_LIGASE_ACTIVITY        | -1.79 | 4    | 0 | 0 | 0 | Repressed |
| 325 | GO_PRE_SNRNP_COMPLEX                                               | -1.79 | 4    | 0 | 0 | 0 | Repressed |
| 326 | GO_REGULATION_OF_CYTOKINESIS                                       | -1.79 | 4    | 0 | 0 | 0 | Repressed |
| 327 | GO_RIBONUCLEOPROTEIN_COMPLEX_SUBUNIT_ORGANIZATION                  | -1.79 | 4    | 0 | 0 | 0 | Repressed |
| 328 | GO_RIBOSOME_ASSEMBLY                                               | -1.79 | 4    | 0 | 0 | 0 | Repressed |
| 329 | GO_RNA_MODIFICATION                                                | -1.79 | 4    | 0 | 0 | 0 | Repressed |
| 330 | GO_SUBSTANTIA_NIGRA_DEVELOPMENT                                    | -1.79 | 4    | 0 | 0 | 0 | Repressed |
| 331 | GO_TRANSCRIPTION_BY_RNA_POLYMERASE_I                               | -1.79 | 4    | 0 | 0 | 0 | Repressed |
| 332 | GO_NUCLEAR_LOCALIZATION_SEQUENCE_BINDING                           | -1.79 | 2.62 | 0 | 0 | 0 | Repressed |
| 333 | GO_TELOMERASE_HOLOENZYME_COMPLEX                                   | -1.79 | 2.62 | 0 | 0 | 0 | Repressed |
| 334 | GO_POSITIVE_REGULATION_OF_CYTOKINESIS                              | -1.79 | 2.61 | 0 | 0 | 0 | Repressed |
| 335 | GO_MEMBRANE_DISASSEMBLY                                            | -1.79 | 2.31 | 0 | 0 | 0 | Repressed |
| 336 | CHEMNITZ_RESPONSE_TO_PROSTAGLANDIN_E2_UP                           | -1.78 | 4    | 0 | 0 | 0 | Repressed |
| 337 | GO_IMPORT_INTO_NUCLEUS                                             | -1.78 | 4    | 0 | 0 | 0 | Repressed |
| 338 | GO_MORPHOGENESIS_OF_A_POLARIZED_EPITHELIUM                         | -1.78 | 4    | 0 | 0 | 0 | Repressed |
| 339 | GO_MRNA_METABOLIC_PROCESS                                          | -1.78 | 4    | 0 | 0 | 0 | Repressed |
| 340 | GO_MULTI_ORGANISM_LOCALIZATION                                     | -1.78 | 4    | 0 | 0 | 0 | Repressed |
| 341 | GRAHAM_CML_QUIESCENT_VS_NORMAL_QUIESCENT_UP                        | -1.78 | 4    | 0 | 0 | 0 | Repressed |
| 342 | LEE_METASTASIS_AND_ALTERNATIVE_SPLICING_DN                         | -1.78 | 4    | 0 | 0 | 0 | Repressed |
| 343 | REACTOME_BMAL1:CLOCK_NPAS2_ACTIVATES_CIRCADIAN_GENE_EXPRESSION     | -1.78 | 4    | 0 | 0 | 0 | Repressed |
| 344 | REACTOME_CONDENSATION_OF_PROPHASE_CHROMOSOMES                      | -1.78 | 4    | 0 | 0 | 0 | Repressed |
| 345 | REACTOME_NUCLEAR_ENVELOPE_BREAKDOWN                                | -1.78 | 4    | 0 | 0 | 0 | Repressed |
| 346 | GO_RNA_5_END_PROCESSING                                            | -1.78 | 2.62 | 0 | 0 | 0 | Repressed |
| 347 | REACTOME_METABOLISM_OF_POLYAMINES                                  | -1.78 | 2.54 | 0 | 0 | 0 | Repressed |
| 348 | REACTOME_HEDGEHOG_LIGAND_BIOGENESIS                                | -1.78 | 2.23 | 0 | 0 | 0 | Repressed |
| 349 | GO_CELL_DIVISION                                                   | -1.77 | 4    | 0 | 0 | 0 | Repressed |
| 350 | GO_POSITIVE_REGULATION_OF_ESTABLISHMENT_OF_PROTEIN_LOCALIZATION_TC | -1.77 | 4    | 0 | 0 | 0 | Repressed |
| 351 | GO_REGULATION_OF_CELLULAR_AMINE_METABOLIC_PROCESS                  | -1.77 | 4    | 0 | 0 | 0 | Repressed |
| 352 | GO_RNA_POLYMERASE_COMPLEX                                          | -1.77 | 4    | 0 | 0 | 0 | Repressed |
| 353 | REACTOME_ACTIVATION_OF_NIMA_KINASES_NEK9_NEK6_NEK7                 | -1.77 | 4    | 0 | 0 | 0 | Repressed |
| 354 | REACTOME_CIRCADIAN_CLOCK                                           | -1.77 | 4    | 0 | 0 | 0 | Repressed |
| 355 | REACTOME_MITOTIC_PROMETAPHASE                                      | -1.77 | 4    | 0 | 0 | 0 | Repressed |
| 356 | GO_CENTROSOME_SEPARATION                                           | -1.77 | 2.64 | 0 | 0 | 0 | Repressed |
| 357 | FOURNIER_ACINAR_DEVELOPMENT_LATE_DN                                | -1.77 | 2.62 | 0 | 0 | 0 | Repressed |
| 358 | DEN_INTERACT_WITH_LCA5                                             | -1.77 | 2.61 | 0 | 0 | 0 | Repressed |
| 359 | EGUCHI_CELL_CYCLE_RB1_TARGETS                                      | -1.77 | 2.59 | 0 | 0 | 1 | Repressed |
| 360 | GO_TRNA_METHYLTRANSFERASE_ACTIVITY                                 | -1.77 | 2.59 | 0 | 0 | 0 | Repressed |
| 361 | KEGG_BASAL_TRANSCRIPTION_FACTORS                                   | -1.77 | 2.57 | 0 | 0 | 0 | Repressed |
| 362 | SHIPP_DLBCL_VS_FOLLICULAR_LYMPHOMA_UP                              | -1.77 | 2.57 | 0 | 0 | 0 | Repressed |
| 363 | REACTOME_KINESINS                                                  | -1.77 | 2.56 | 0 | 0 | 0 | Repressed |
| 364 | GO_SIRNA_BINDING                                                   | -1.77 | 2.34 | 0 | 0 | 0 | Repressed |
| 365 | SIMBLAN_PARP1_TARGETS_DN                                           | -1.77 | 2.34 | 0 | 0 | 0 | Repressed |
| 366 | REACTOME_FORMATION_OF_TUBULIN_FOLDING_INTERMEDIATES_BY_CCT_TRIC    | -1.77 | 2.33 | 0 | 0 | 0 | Repressed |
| 367 | REACTOME_SYNTHESIS_OF_ACTIVE_UBIQUITIN:ROLES_OF_E1_AND_E2_ENZYMES  | -1.77 | 2.16 | 0 | 0 | 0 | Repressed |
| 368 | BHAT_ESR1_TARGETS_VIA_AKT1_UP                                      | -1.76 | 4    | 0 | 0 | 0 | Repressed |
| 369 | GO_INNATE_IMMUNE_RESPONSE_ACTIVATING_CELL_SURFACE_RECEPTOR_SIGNA   | -1.76 | 4    | 0 | 0 | 0 | Repressed |
| 370 | GO_REGULATION_OF_RNA_METABOLIC_PROCESS                             | -1.76 | 4    | 0 | 0 | 0 | Repressed |
| 371 | GO_REGULATION_OF_STEM_CELL_DIFFERENTIATION                         | -1.76 | 4    | 0 | 0 | 0 | Repressed |
| 372 | GO_SNRNA_TRANSCRIPTION                                             | -1.76 | 4    | 0 | 0 | 0 | Repressed |
| 373 | REACTOME_HIV_LIFE_CYCLE                                            | -1.76 | 4    | 0 | 0 | 0 | Repressed |
| 374 | REACTOME_PHOSPHORYLATION_OF_EMI1                                   | -1.76 | 2.67 | 0 | 0 | 0 | Repressed |
| 375 | COLLIS_PRKDC_REGULATORS                                            | -1.76 | 2.6  | 0 | 0 | 0 | Repressed |
| 376 | GO_GENERAL_TRANSCRIPTION_INITIATION_FACTOR_BINDING                 | -1.76 | 2.59 | 0 | 0 | 0 | Repressed |
| 377 | REACTOME_EXPORT_OF_VIRAL_RIBONUCLEOPROTEINS_FROM_NUCLEUS           | -1.76 | 2.57 | 0 | 0 | 0 | Repressed |
| 378 | SPIRA_SMOKERS_LUNG_CANCER_DN                                       | -1.76 | 2.34 | 0 | 0 | 0 | Repressed |
| 379 | DACOSTA_UV_RESPONSE_VIA_ERCC3_COMMON_DN                            | -1.75 | 4    | 0 | 0 | 0 | Repressed |
| 380 | DACOSTA_UV_RESPONSE_VIA_ERCC3_DN                                   | -1.75 | 4    | 0 | 0 | 0 | Repressed |
| 381 | GO_CONDENSED_CHROMOSOME_CENTROMERIC_REGION                         | -1.75 | 4    | 0 | 0 | 0 | Repressed |
| 382 | GO_DNA_TEMPLATED_TRANSCRIPTION_INITIATION                          | -1.75 | 4    | 0 | 0 | 0 | Repressed |
| 383 | GO_MRNA_EXPORT_FROM_NUCLEUS                                        | -1.75 | 4    | 0 | 0 | 0 | Repressed |
| 384 | GO_SPINDLE_ASSEMBLY                                                | -1.75 | 4    | 0 | 0 | 0 | Repressed |
| 385 | HALLMARK_E2F_TARGETS                                               | -1.75 | 4    | 0 | 0 | 0 | Repressed |
| 386 | MARCHINI TRABECTEDIN_RESISTANCE_DN                                 | -1.75 | 4    | 0 | 0 | 0 | Repressed |
| 387 | REACTOME_GOLGI_CISTERNAE_PERICENTRIOLAR_STACK_REORGANIZATION       | -1.75 | 4    | 0 | 0 | 0 | Repressed |
| 388 | REACTOME_REGULATION_OF_MRNA_STABILITY_BY_PROTEINS_THAT_BIND_AU_RI  | -1.75 | 4    | 0 | 0 | 0 | Repressed |
| 389 | REACTOME_TRNA_PROCESSING_IN_THE_NUCLEUS                            | -1.75 | 4    | 0 | 0 | 0 | Repressed |
| 390 | VANHARANTA_UTERINE_FIBROID_WITH_7Q_DELETION_UP                     | -1.75 | 4    | 0 | 0 | 0 | Repressed |
| 391 | FUNG_IL2_SIGNALING_1                                               | -1.75 | 2.64 | 0 | 0 | 0 | Repressed |
| 392 | GO_NEGATIVE_REGULATION_OF_MRNA_SPLICING_VIA_SPLICEOSOME            | -1.75 | 2.63 | 0 | 0 | 0 | Repressed |
| 393 | GO_CONDENSED_NUCLEAR_CHROMOSOME_CENTROMERIC_REGION                 | -1.75 | 2.62 | 0 | 0 | 0 | Repressed |
| 394 | ZEMBUTSU_SENSITIVITY_TO_NIMUSTINE                                  | -1.75 | 2.62 | 0 | 0 | 0 | Repressed |
| 395 | REACTOME_TRANSCRIPTIONAL_REGULATION_BY_SMALL_RNAS                  | -1.75 | 2.51 | 0 | 0 | 0 | Repressed |
| 396 | GO_TIM23_MITOCHONDRIAL_IMPORT_INNER_MEMBRANE_TRANSLOCASE_COMPLE    | -1.75 | 2.34 | 0 | 0 | 0 | Repressed |
| 397 | FU_INTERACT_WITH_ALKBH8                                            | -1.75 | 2.18 | 0 | 0 | 0 | Repressed |
| 398 | XU_HGF_SIGNALING_NOT_VIA_AKT1_48HR_DN                              | -1.75 | 2.04 | 0 | 0 | 0 | Repressed |
| 399 | GO_BOX_H_ACA_RNP_COMPLEX                                           | -1.74 | 4    | 0 | 0 | 0 | Repressed |
| 400 | GO_PROTEIN_PHOSPHORYLATED_AMINO_ACID_BINDING                       | -1.74 | 4    | 0 | 0 | 0 | Repressed |
| 401 | GO_REGULATION_OF_PEPIDYL_THREONINE_PHOSPHORYLATION                 | -1.74 | 4    | 0 | 0 | 0 | Repressed |
| 402 | GO_REGULATION_OF_TRANSCRIPTION_FROM_RNA_POLYMERASE_II_PROMOTER     | -1.74 | 4    | 0 | 0 | 0 | Repressed |
| 403 | GO_STRUCTURAL_CONSTITUENT_OF_NUCLEAR_PORE                          | -1.74 | 4    | 0 | 0 | 0 | Repressed |
| 404 | REACTOME_SUMOYLATION_OF_UBIQUITINYLATION_PROTEINS                  | -1.74 | 4    | 0 | 0 | 0 | Repressed |
| 405 | REACTOME_TRANSCRIPTIONAL_REGULATION_BY_RUNX3                       | -1.74 | 4    | 0 | 0 | 0 | Repressed |
| 406 | REACTOME_PHOSPHORYLATION_SITE_MUTANTS_OF_CTNNB1_ARE_NOT_TARGETI    | -1.74 | 2.63 | 0 | 0 | 0 | Repressed |
| 407 | REACTOME_DEFECTIVE_TPR_MAY_CONFER_SUSCEPTIBILITY_TOWARDS_THYROI    | -1.74 | 2.57 | 0 | 0 | 0 | Repressed |
| 408 | GO_REGULATION_OF_HEMATOPOIETIC_PROGENITOR_CELL_DIFFERENTIATION     | -1.74 | 2.54 | 0 | 0 | 0 | Repressed |
| 409 | GO_REGULATION_OF_ESTABLISHMENT_OF_PLANAR_POLARITY                  | -1.74 | 2.47 | 0 | 0 | 0 | Repressed |
| 410 | GO_CHAPERONIN_CONTAINING_T_COMPLEX                                 | -1.74 | 2.2  | 0 | 0 | 0 | Repressed |
| 411 | GO_TRNA_METHYLATION                                                | -1.74 | 2.1  | 0 | 0 | 0 | Repressed |
| 412 | EPPERT_PROGENITOR                                                  | -1.73 | 4    | 0 | 0 | 0 | Repressed |
| 413 | GO_ALTERNATIVE_MRNA_SPLICING_VIA_SPLICEOSOME                       | -1.73 | 4    | 0 | 0 | 0 | Repressed |
| 414 | GO_RESPONSE_TO_HEAT                                                | -1.73 | 4    | 0 | 0 | 0 | Repressed |
| 415 | GO_TRANSPORT_OF_VIRUS                                              | -1.73 | 4    | 0 | 0 | 0 | Repressed |
| 416 | GO_UNFOLDED_PROTEIN_BINDING                                        | -1.73 | 4    | 0 | 0 | 0 | Repressed |
| 417 | REACTOME_MITOTIC_G2_M_PHASES                                       | -1.73 | 4    | 0 | 0 | 0 | Repressed |
| 418 | RODRIGUES_THYROID_CARCINOMA_POORLY_DIFFERENTIATED_UP               | -1.73 | 4    | 0 | 0 | 0 | Repressed |
| 419 | GO_POSITIVE_REGULATION_OF_RIBOSOME_BIOGENESIS                      | -1.73 | 2.66 | 0 | 0 | 0 | Repressed |
| 420 | MONTERO_THYROID_CANCER_POOR_SURVIVAL_UP                            | -1.73 | 2.66 | 0 | 0 | 0 | Repressed |
| 421 | GO_MICROTUBULE_PLUS_END                                            | -1.73 | 2.6  | 0 | 0 | 0 | Repressed |
| 422 | GO_MICROTUBULE_MOTOR_ACTIVITY                                      | -1.73 | 2.51 | 0 | 0 | 0 | Repressed |
| 423 | GO_PROTEIN_LOCALIZATION_TO_CYTOPLASMIC_STRESS_GRANULE              | -1.73 | 2.35 | 0 | 0 | 0 | Repressed |
| 424 | GO_RNA_CAPPING                                                     | -1.73 | 2.31 | 0 | 0 | 0 | Repressed |



|     |                                                                   |       |      |   |   |   |           |
|-----|-------------------------------------------------------------------|-------|------|---|---|---|-----------|
| 425 | GO_KINESIN_COMPLEX                                                | -1.73 | 2.25 | 0 | 0 | 0 | Repressed |
| 426 | GO_SPINDLE_LOCALIZATION                                           | -1.73 | 2.25 | 0 | 0 | 0 | Repressed |
| 427 | GO_ATP_DEPENDENT_MICROTUBULE_MOTOR_ACTIVITY                       | -1.73 | 2.12 | 0 | 0 | 0 | Repressed |
| 428 | GO_NEURAL_NUCLEUS_DEVELOPMENT                                     | -1.73 | 1.98 | 0 | 0 | 0 | Repressed |
| 429 | REACTOME_HSF1_DEPENDENT_TRANSACTIVATION                           | -1.73 | 1.96 | 0 | 0 | 0 | Repressed |
| 430 | BILD_MYC_ONCOGENIC_SIGNATURE                                      | -1.72 | 4    | 0 | 1 | 0 | Repressed |
| 431 | BOYALULT_LIVER_CANCER_SUBCLASS_G123_UP                            | -1.72 | 4    | 0 | 0 | 0 | Repressed |
| 432 | CONCANNON_APOPTOSIS_BY_EPOXOMICIN_DN                              | -1.72 | 4    | 0 | 0 | 0 | Repressed |
| 433 | FISCHER_DREAM_TARGETS                                             | -1.72 | 4    | 0 | 0 | 0 | Repressed |
| 434 | GO_BOX_C_D_SNORNP_ASSEMBLY                                        | -1.72 | 4    | 0 | 0 | 0 | Repressed |
| 435 | GO_BOX_H_ACA_SNORNA_BINDING                                       | -1.72 | 4    | 0 | 0 | 0 | Repressed |
| 436 | GO_NUCLEAR_PERIPHERY                                              | -1.72 | 4    | 0 | 0 | 0 | Repressed |
| 437 | GO_REGULATION_OF_PROTEIN_DEPHOSPHORYLATION                        | -1.72 | 4    | 0 | 0 | 0 | Repressed |
| 438 | GO_REGULATION_OF_UBIQUITIN_PROTEIN_LIGASE_ACTIVITY                | -1.72 | 4    | 0 | 0 | 0 | Repressed |
| 439 | INAMURA_LUNG_CANCER_SCC_UP                                        | -1.72 | 4    | 0 | 0 | 0 | Repressed |
| 440 | PETROVA_ENDOTHELIIUM_LYMPHATIC_VS_BLOOD_UP                        | -1.72 | 4    | 0 | 0 | 0 | Repressed |
| 441 | REACTOME_ANTIVIRAL_MECHANISM_BY_IFN_STIMULATED_GENES              | -1.72 | 4    | 0 | 0 | 0 | Repressed |
| 442 | REACTOME_FOLDING_OF_ACTIN_BY_CCT_TRIC                             | -1.72 | 4    | 0 | 0 | 0 | Repressed |
| 443 | REACTOME_REGULATION_OF_HSF1_MEDIATED_HEAT_SHOCK_RESPONSE          | -1.72 | 4    | 0 | 0 | 0 | Repressed |
| 444 | WINTER_HYPOXIA_UP                                                 | -1.72 | 4    | 0 | 0 | 0 | Repressed |
| 445 | GO_SMALL_NUCLEOLAR_RIBONUCLEOPROTEIN_COMPLEX_ASSEMBLY             | -1.72 | 2.66 | 0 | 0 | 0 | Repressed |
| 446 | FUNG_IL2_TARGETS_WITH_STATS_BINDING_SITES                         | -1.72 | 2.65 | 0 | 0 | 0 | Repressed |
| 447 | GO_NEURON_PROJECTION_CYTOPLASM                                    | -1.72 | 2.53 | 0 | 0 | 0 | Repressed |
| 448 | HU_GENOTOXIC_DAMAGE_4HR                                           | -1.72 | 2.3  | 0 | 0 | 0 | Repressed |
| 449 | GO_REGULATION_OF_ESTABLISHMENT_OF_PROTEIN_LOCALIZATION_TO_CHROMC  | -1.72 | 2.02 | 0 | 0 | 0 | Repressed |
| 450 | REACTOME_ATTENUATION_PHASE                                        | -1.72 | 2    | 0 | 0 | 0 | Repressed |
| 451 | LIANG_SILENCED_BY_METHYLATION_UP                                  | -1.72 | 1.87 | 0 | 0 | 0 | Repressed |
| 452 | GO_CELLULAR_RESPONSE_TO_HEAT                                      | -1.71 | 4    | 0 | 0 | 0 | Repressed |
| 453 | GO_MITOTIC_NUCLEAR_DIVISION                                       | -1.71 | 4    | 0 | 0 | 0 | Repressed |
| 454 | GO_REGULATION_OF_MRNA_PROCESSING                                  | -1.71 | 4    | 0 | 0 | 0 | Repressed |
| 455 | GO_REGULATION_OF_TRANSLATIONAL_TERMINATION                        | -1.71 | 4    | 0 | 0 | 0 | Repressed |
| 456 | REACTOME_BETA_CATENIN_INDEPENDENT_WNT_SIGNALING                   | -1.71 | 4    | 0 | 0 | 0 | Repressed |
| 457 | REACTOME_CELLULAR_RESPONSE_TO_HEAT_STRESS                         | -1.71 | 4    | 0 | 0 | 0 | Repressed |
| 458 | TOYOTA_TARGETS_OF_MIR34B_AND_MIR34C                               | -1.71 | 4    | 0 | 0 | 0 | Repressed |
| 459 | WHITFIELD_CELL_CYCLE_G2                                           | -1.71 | 4    | 0 | 0 | 0 | Repressed |
| 460 | XU_RESPONSE_TO_TRETINOIN_AND_NSC682994_DN                         | -1.71 | 4    | 0 | 0 | 0 | Repressed |
| 461 | GO_HISTONE_SERINE_PHOSPHORYLATION                                 | -1.71 | 2.67 | 0 | 0 | 0 | Repressed |
| 462 | GO_RIBOSOMAL_PROTEIN_IMPORT_INTO_NUCLEUS                          | -1.71 | 2.65 | 0 | 0 | 0 | Repressed |
| 463 | CHR17Q22                                                          | -1.71 | 2.59 | 0 | 0 | 0 | Repressed |
| 464 | KENNY_CTNNB1_TARGETS_UP                                           | -1.71 | 2.57 | 0 | 0 | 0 | Repressed |
| 465 | KEGG_PROGESTERONE_MEDIATED_OOCYTE_MATURATION                      | -1.71 | 2.55 | 0 | 0 | 0 | Repressed |
| 466 | REACTOME_DEFECTIVE_CFTR_CAUSES_CYSTIC_FIBROSIS                    | -1.71 | 2.53 | 0 | 0 | 0 | Repressed |
| 467 | REACTOME_FGFR2_ALTERNATIVE_SPLICING                               | -1.71 | 2.34 | 0 | 0 | 0 | Repressed |
| 468 | REACTOME_RORA_ACTIVATES_GENE_EXPRESSION                           | -1.71 | 2.34 | 0 | 0 | 0 | Repressed |
| 469 | GO_RNA_HELICASE_ACTIVITY                                          | -1.71 | 2.26 | 0 | 0 | 0 | Repressed |
| 470 | REACTOME_MRNA_CAPPING                                             | -1.71 | 2.26 | 0 | 0 | 0 | Repressed |
| 471 | REACTOME_COOPERATION_OF_PREFOLDIN_AND_TRIC_CCT_IN_ACTIN_AND_TUBU  | -1.71 | 1.94 | 0 | 0 | 0 | Repressed |
| 472 | BHATTACHARYA_EMBRYONIC_STEM_CELL                                  | -1.70 | 4    | 0 | 0 | 0 | Repressed |
| 473 | CHR1P34                                                           | -1.70 | 4    | 0 | 0 | 0 | Repressed |
| 474 | GO_POSITIVE_REGULATION_OF_CANONICAL_WNT_SIGNALING_PATHWAY         | -1.70 | 4    | 0 | 0 | 0 | Repressed |
| 475 | GO_RNA_SPLICING                                                   | -1.70 | 4    | 0 | 0 | 0 | Repressed |
| 476 | GRADE_COLON_AND_RECTAL_CANCER_UP                                  | -1.70 | 4    | 0 | 0 | 0 | Repressed |
| 477 | LI_WILMS_TUMOR_VS_FETAL_KIDNEY_1_DN                               | -1.70 | 4    | 0 | 0 | 0 | Repressed |
| 478 | BIOCARTA_RARRXR_PATHWAY                                           | -1.70 | 2.65 | 0 | 0 | 0 | Repressed |
| 479 | CHENG_RESPONSE_TO_NICKEL_ACETATE                                  | -1.70 | 2.56 | 0 | 0 | 0 | Repressed |
| 480 | REACTOME_MITOCHONDRIAL_PROTEIN_IMPORT                             | -1.70 | 2.53 | 0 | 0 | 0 | Repressed |
| 481 | GO_POSITIVE_REGULATION_OF_MRNA_METABOLIC_PROCESS                  | -1.70 | 2.5  | 0 | 0 | 0 | Repressed |
| 482 | GO_VENTRICULAR_CARDIAC_MUSCLE_CELL_DIFFERENTIATION                | -1.70 | 2.33 | 0 | 0 | 0 | Repressed |
| 483 | REACTOME_PREFOLDIN_MEDIATED_TRANSFER_OF_SUBSTRATE_TO_CCT_TRIC     | -1.70 | 2.3  | 0 | 0 | 0 | Repressed |
| 484 | GO_NUCLEAR_EXPORT_SIGNAL_RECEPTOR_ACTIVITY                        | -1.70 | 2.2  | 0 | 0 | 0 | Repressed |
| 485 | REACTOME_TRANSPORT_OF_MATURE_TRANSCRIPT_TO_CYTOPLASM              | -1.70 | 2.2  | 0 | 0 | 0 | Repressed |
| 486 | LE_NEURONAL_DIFFERENTIATION_DN                                    | -1.70 | 2.14 | 0 | 0 | 0 | Repressed |
| 487 | WAESCH_ANAPHASE_PROMOTING_COMPLEX                                 | -1.70 | 2.06 | 0 | 0 | 0 | Repressed |
| 488 | GO_PROTEIN_PHOSPHATASE_TYPE_2A_COMPLEX                            | -1.70 | 2.05 | 0 | 0 | 0 | Repressed |
| 489 | CHR5Q32                                                           | -1.70 | 2.04 | 0 | 0 | 0 | Repressed |
| 490 | BIOCARTA_EIF2_PATHWAY                                             | -1.69 | 4    | 0 | 0 | 0 | Repressed |
| 491 | GO_BOX_H_ACA_SNORNP_COMPLEX                                       | -1.69 | 4    | 0 | 0 | 0 | Repressed |
| 492 | GO_CHROMOSOME_LOCALIZATION                                        | -1.69 | 4    | 0 | 0 | 0 | Repressed |
| 493 | GO_CHROMOSOME_PASSENGER_COMPLEX                                   | -1.69 | 4    | 0 | 0 | 0 | Repressed |
| 494 | GO_NEGATIVE_REGULATION_OF_CELL_CYCLE_G2_M_PHASE_TRANSITION        | -1.69 | 4    | 0 | 0 | 0 | Repressed |
| 495 | GO_NEGATIVE_REGULATION_OF_NUCLEAR_DIVISION                        | -1.69 | 4    | 0 | 0 | 0 | Repressed |
| 496 | GO_PROTEIN_LOCALIZATION_TO_CHROMOSOME                             | -1.69 | 4    | 0 | 0 | 0 | Repressed |
| 497 | GO_REGULATION_OF_MORPHOGENESIS_OF_AN_EPITHELIUM                   | -1.69 | 4    | 0 | 0 | 0 | Repressed |
| 498 | MITSADES_RESPONSE_TO_APLIDIN_DN                                   | -1.69 | 4    | 0 | 0 | 0 | Repressed |
| 499 | REACTOME_TRNA_MODIFICATION_IN_THE_NUCLEUS_AND_CYTOSOL             | -1.69 | 4    | 0 | 0 | 0 | Repressed |
| 500 | SESTO_RESPONSE_TO_UV_C5                                           | -1.69 | 4    | 0 | 0 | 0 | Repressed |
| 501 | GO_SAGA_COMPLEX                                                   | -1.69 | 2.63 | 0 | 0 | 0 | Repressed |
| 502 | REACTOME_CYCLIN_A_B1_B2_ASSOCIATED_EVENTS_DURING_G2_M_TRANSITION  | -1.69 | 2.6  | 0 | 0 | 0 | Repressed |
| 503 | GO_TOXIN_TRANSPORT                                                | -1.69 | 2.58 | 0 | 0 | 0 | Repressed |
| 504 | JIANG_HYPOXIA_CANCER                                              | -1.69 | 2.57 | 0 | 0 | 0 | Repressed |
| 505 | REACTOME_RNA_POLYMERASE_II_TRANSCRIPTION_ELONGATION               | -1.69 | 2.53 | 0 | 0 | 0 | Repressed |
| 506 | GO_CHROMOSOME_MOVEMENT_TOWARDS_SPINDLE_POLE                       | -1.69 | 2.37 | 0 | 0 | 0 | Repressed |
| 507 | GO_REGULATION_OF_WOUND_HEALING_SPREADING_OF_EPIDERMAL_CELLS       | -1.69 | 2.37 | 0 | 0 | 0 | Repressed |
| 508 | GO_ATP_DEPENDENT_MICROTUBULE_MOTOR_ACTIVITY_PLUS_END_DIRECTED     | -1.69 | 2.32 | 0 | 0 | 0 | Repressed |
| 509 | GO_UBIQUITIN_LIKE_PROTEIN_CONJUGATING_ENZYME_ACTIVITY             | -1.69 | 2.28 | 0 | 0 | 0 | Repressed |
| 510 | GO_NUCLEAR_IMPORT_SIGNAL_RECEPTOR_ACTIVITY                        | -1.69 | 2.19 | 0 | 0 | 0 | Repressed |
| 511 | GO_DE_NOVO_PROTEIN_FOLDING                                        | -1.69 | 2.13 | 0 | 0 | 0 | Repressed |
| 512 | GO_EXON_EXON_JUNCTION_COMPLEX                                     | -1.69 | 2.04 | 0 | 0 | 0 | Repressed |
| 513 | GO_RRNA_CONTAINING_RIBONUCLEOPROTEIN_COMPLEX_EXPORT_FROM_NUCLEL   | -1.69 | 1.92 | 0 | 0 | 0 | Repressed |
| 514 | GO_AXON_HILLOCK                                                   | -1.68 | 4    | 0 | 0 | 0 | Repressed |
| 515 | GO_CHROMOSOME_SEGREGATION                                         | -1.68 | 4    | 0 | 0 | 0 | Repressed |
| 516 | GO_ENDONUCLEOLYTIC_CLEAVAGE_IN_5_ETS_OF_TRICISTRONIC_RRNA_TRANSCI | -1.68 | 4    | 0 | 0 | 0 | Repressed |
| 517 | GO_KINETOCHORE_BINDING                                            | -1.68 | 4    | 0 | 0 | 0 | Repressed |
| 518 | GO_NUCLEAR_ENVELOPE_ORGANIZATION                                  | -1.68 | 4    | 0 | 0 | 0 | Repressed |
| 519 | GO_NUCLEOLUS_ORGANIZATION                                         | -1.68 | 4    | 0 | 0 | 0 | Repressed |
| 520 | GO_PROTEIN_DEPHOSPHORYLATION                                      | -1.68 | 4    | 0 | 0 | 0 | Repressed |
| 521 | KIM_WT1_TARGETS_8HR_UP                                            | -1.68 | 4    | 0 | 0 | 0 | Repressed |
| 522 | REACTOME_GENE_SILENCING_BY_RNA                                    | -1.68 | 4    | 0 | 0 | 0 | Repressed |
| 523 | REACTOME_ORGANIC_CATION_TRANSPORT                                 | -1.68 | 4    | 0 | 0 | 0 | Repressed |
| 524 | REACTOME_RHO_GTPASE_EFFECTORS                                     | -1.68 | 4    | 0 | 0 | 0 | Repressed |
| 525 | REACTOME_TCF_DEPENDENT_SIGNALING_IN_RESPONSE_TO_WNT               | -1.68 | 4    | 0 | 0 | 0 | Repressed |
| 526 | GO_AXO_DENDRITIC_TRANSPORT                                        | -1.68 | 2.56 | 0 | 0 | 0 | Repressed |
| 527 | GO_TRANSCRIPTION_INITIATION_FROM_RNA_POLYMERASE_II_PROMOTER       | -1.68 | 2.4  | 0 | 0 | 0 | Repressed |
| 528 | GO_UBIQUITIN_RECYCLING                                            | -1.68 | 2.37 | 0 | 0 | 0 | Repressed |
| 529 | GO_REGULATION_OF_CARDIAC_CONDUCTION                               | -1.68 | 2.29 | 0 | 0 | 0 | Repressed |
| 530 | GO_ENDONUCLEOLYTIC_CLEAVAGE_INVOLVED_IN_RRNA_PROCESSING           | -1.68 | 2.18 | 0 | 0 | 0 | Repressed |
| 531 | GO_NEGATIVE_REGULATION_OF_MRNA_PROCESSING                         | -1.68 | 2.12 | 0 | 0 | 0 | Repressed |
| 532 | REACTOME_REGULATION_OF_GLYCOLYSIS_BY_FRUCTOSE_2_6_BISPHOSPHATE_I  | -1.68 | 1.87 | 0 | 0 | 0 | Repressed |
| 533 | BORCZUK_MALIGNANT_MESOTHELIOMA_UP                                 | -1.67 | 4    | 0 | 0 | 0 | Repressed |

|     |                                                                   |       |      |   |   |   |           |
|-----|-------------------------------------------------------------------|-------|------|---|---|---|-----------|
| 534 | DAZARD_RESPONSE_TO_UV_NHEK_DN                                     | -1.67 | 4    | 0 | 0 | 0 | Repressed |
| 535 | GO_NUCLEAR_CHROMOSOME_SEGREGATION                                 | -1.67 | 4    | 0 | 0 | 0 | Repressed |
| 536 | GO_RNA_METHYLTRANSFERASE_ACTIVITY                                 | -1.67 | 4    | 0 | 0 | 0 | Repressed |
| 537 | GROSS_HYPOXIA_VIA_ELK3_UP                                         | -1.67 | 4    | 0 | 0 | 0 | Repressed |
| 538 | TONKS_TARGETS_OF_RUNX1_RUNX1T1_FUSION_MONOCYTE_UP                 | -1.67 | 4    | 0 | 0 | 0 | Repressed |
| 539 | REACTOME_SIGNALING_BY_FGFR                                        | -1.67 | 2.54 | 0 | 0 | 0 | Repressed |
| 540 | MOLENAAR_TARGETS_OF_CCND1_AND_CDK4_DN                             | -1.67 | 2.25 | 0 | 0 | 0 | Repressed |
| 541 | GO_RIBOSOMAL_SMALL_SUBUNIT_BINDING                                | -1.67 | 2.05 | 0 | 0 | 0 | Repressed |
| 542 | GO_3_5_RNA_HELICASE_ACTIVITY                                      | -1.67 | 2.01 | 0 | 0 | 0 | Repressed |
| 543 | GO_TRNA_THREONYLCARBAMOYLADENOSINE_METABOLIC_PROCESS              | -1.67 | 1.94 | 1 | 0 | 0 | Repressed |
| 544 | GO_FEMALE_MEIOTIC_NUCLEAR_DIVISION                                | -1.67 | 1.93 | 0 | 0 | 0 | Repressed |
| 545 | BIOCARTA_VDR_PATHWAY                                              | -1.67 | 1.85 | 0 | 0 | 0 | Repressed |
| 546 | KORKOLA_TERATOMA                                                  | -1.67 | 1.84 | 0 | 0 | 0 | Repressed |
| 547 | JAEGER_METASTASIS_UP                                              | -1.67 | 1.8  | 0 | 0 | 0 | Repressed |
| 548 | REACTOME_IMPORT_OF_PALMITOYL_COA_INTO_THE_MITOCHONDRIAL_MATRIX    | -1.67 | 1.7  | 0 | 0 | 0 | Repressed |
| 549 | BOYALT_LIVER_CANCER_SUBCLASS_G23_UP                               | -1.66 | 4    | 0 | 0 | 0 | Repressed |
| 550 | BROWNE_HCMV_INFECTION_20HR_UP                                     | -1.66 | 4    | 0 | 0 | 0 | Repressed |
| 551 | GO_MICROTUBULE_ASSOCIATED_COMPLEX                                 | -1.66 | 4    | 0 | 0 | 0 | Repressed |
| 552 | GO_MITOCHONDRIAL_GENE_EXPRESSION                                  | -1.66 | 4    | 0 | 0 | 0 | Repressed |
| 553 | GO_MRNA_BINDING                                                   | -1.66 | 4    | 0 | 0 | 0 | Repressed |
| 554 | GO_PROTEIN_TRANSPORTER_ACTIVITY                                   | -1.66 | 4    | 0 | 0 | 0 | Repressed |
| 555 | GO_REGULATION_OF_POSTTRANSCRIPTIONAL_GENE_SILENCING               | -1.66 | 4    | 0 | 0 | 0 | Repressed |
| 556 | GO_RNA_3_END_PROCESSING                                           | -1.66 | 4    | 0 | 0 | 0 | Repressed |
| 557 | REACTOME_FORMATION_OF_TC_NER_PRE_INCISION_COMPLEX                 | -1.66 | 4    | 0 | 0 | 0 | Repressed |
| 558 | REACTOME_NEDDYLATION                                              | -1.66 | 4    | 0 | 0 | 0 | Repressed |
| 559 | GO_DNA_TOPOISOMERASE_ACTIVITY                                     | -1.66 | 2.67 | 0 | 0 | 0 | Repressed |
| 560 | LIU_CDX2_TARGETS_UP                                               | -1.66 | 2.63 | 0 | 0 | 0 | Repressed |
| 561 | GO_EPITHELIAL_STRUCTURE_MAINTENANCE                               | -1.66 | 2.6  | 0 | 0 | 0 | Repressed |
| 562 | YANG_BREAST_CANCER_ESR1_LASER_DN                                  | -1.66 | 2.56 | 0 | 0 | 0 | Repressed |
| 563 | GO_DENDRITIC_TRANSPORT                                            | -1.66 | 2.39 | 0 | 0 | 0 | Repressed |
| 564 | WU_APOPTOSIS_BY_CDKN1A_VIA_TP53                                   | -1.66 | 2.25 | 0 | 0 | 0 | Repressed |
| 565 | GO_REGULATION_OF_NUCLEOCYTOPLASMIC_TRANSPORT                      | -1.66 | 2.24 | 0 | 0 | 0 | Repressed |
| 566 | GO_POSITIVE_REGULATION_OF_TYPE_I_INTERFERON_PRODUCTION            | -1.66 | 2.23 | 0 | 0 | 0 | Repressed |
| 567 | GO_NEGATIVE_REGULATION_OF_CARTILAGE_DEVELOPMENT                   | -1.66 | 2.19 | 0 | 0 | 0 | Repressed |
| 568 | GO_CHROMOCENTER                                                   | -1.66 | 2.17 | 0 | 0 | 0 | Repressed |
| 569 | BILANGES_SERUM_SENSITIVE_VIA_TSC2                                 | -1.66 | 2.15 | 0 | 0 | 0 | Repressed |
| 570 | GO_ATTACHMENT_OF_SPINDLE_MICROTUBULES_TO_KINETOCHORE              | -1.66 | 2.11 | 0 | 0 | 0 | Repressed |
| 571 | REACTOME_SIGNALING_BY_FGFR2                                       | -1.66 | 2.09 | 0 | 0 | 0 | Repressed |
| 572 | REACTOME_CONDENSATION_OF_PROMETAPHASE_CHROMOSOMES                 | -1.66 | 2.05 | 0 | 0 | 0 | Repressed |
| 573 | REACTOME_SIGNALING_BY_FGFR2_IIA_TM                                | -1.66 | 1.94 | 0 | 0 | 0 | Repressed |
| 574 | GO_WOUND_HEALING_SPREADING_OF_EPIDERMAL_CELLS                     | -1.66 | 1.93 | 0 | 0 | 0 | Repressed |
| 575 | CHANDRAN_METASTASIS_TOP50_UP                                      | -1.66 | 1.9  | 0 | 0 | 0 | Repressed |
| 576 | REACTOME_PLATELET_SENSITIZATION_BY_LDL                            | -1.66 | 1.86 | 0 | 0 | 0 | Repressed |
| 577 | GO_DYNEIN_INTERMEDIATE_CHAIN_BINDING                              | -1.66 | 1.85 | 0 | 0 | 0 | Repressed |
| 578 | REACTOME_FGFR2_MUTANT_RECEPTOR_ACTIVATION                         | -1.66 | 1.85 | 0 | 0 | 0 | Repressed |
| 579 | SMID_BREAST_CANCER_LUMINAL_A_DN                                   | -1.66 | 1.66 | 0 | 0 | 0 | Repressed |
| 580 | BASSO_B_LYMPHOCYTE_NETWORK                                        | -1.65 | 4    | 0 | 0 | 0 | Repressed |
| 581 | DING_LUNG_CANCER_EXPRESSION_BY_COPY_NUMBER                        | -1.65 | 4    | 0 | 0 | 0 | Repressed |
| 582 | GO_AXON_CYTOPLASM                                                 | -1.65 | 4    | 0 | 0 | 0 | Repressed |
| 583 | GOBERT_OLIGODENDROCYTE_DIFFERENTIATION_UP                         | -1.65 | 4    | 0 | 0 | 0 | Repressed |
| 584 | JOHNSTONE_PARVB_TARGETS_3_DN                                      | -1.65 | 4    | 0 | 0 | 0 | Repressed |
| 585 | MARTORIATI_MDM4_TARGETS_FETAL_LIVER_DN                            | -1.65 | 4    | 0 | 0 | 0 | Repressed |
| 586 | YORDY_RECIPROCAL_REGULATION_BY_ETS1_AND_SP100_DN                  | -1.65 | 2.57 | 0 | 0 | 0 | Repressed |
| 587 | GO_ANAPHASE_PROMOTING_COMPLEX_BINDING                             | -1.65 | 2.38 | 0 | 0 | 0 | Repressed |
| 588 | GO_PROTEASOME_ACTIVATING_ATPASE_ACTIVITY                          | -1.65 | 2.22 | 0 | 0 | 0 | Repressed |
| 589 | GO_MAINTENANCE_OF_GASTROINTESTINAL_EPITHELIUM                     | -1.65 | 2.07 | 0 | 0 | 0 | Repressed |
| 590 | GO_CONDENSED_NUCLEAR_CHROMOSOME_KINETOCHORE                       | -1.65 | 1.97 | 0 | 0 | 0 | Repressed |
| 591 | GO_CELLULAR_RESPONSE_TO_MANGANESE_ION                             | -1.65 | 1.92 | 0 | 0 | 0 | Repressed |
| 592 | GO_NEURON_FATE_COMMITMENT                                         | -1.65 | 1.78 | 0 | 0 | 0 | Repressed |
| 593 | GO_CELL_CYCLE_G2_M_PHASE_TRANSITION                               | -1.64 | 4    | 0 | 0 | 1 | Repressed |
| 594 | GO_DNA_TEMPLATED_TRANSCRIPTION_ELONGATION                         | -1.64 | 4    | 0 | 0 | 0 | Repressed |
| 595 | GO_PHOSPHOPROTEIN_BINDING                                         | -1.64 | 4    | 0 | 0 | 0 | Repressed |
| 596 | GO_REGULATION_OF_CELL_DIVISION                                    | -1.64 | 4    | 0 | 0 | 0 | Repressed |
| 597 | LASTOWSKA_NEUROBLASTOMA_COPY_NUMBER_UP                            | -1.64 | 4    | 0 | 0 | 0 | Repressed |
| 598 | REACTOME_CELL_CYCLE_MITOTIC                                       | -1.64 | 4    | 0 | 0 | 0 | Repressed |
| 599 | REACTOME_MITOTIC_PROPHASE                                         | -1.64 | 4    | 0 | 0 | 0 | Repressed |
| 600 | REACTOME_ORGANIC_CATION_ANION_ZWITTERION_TRANSPORT                | -1.64 | 4    | 0 | 0 | 0 | Repressed |
| 601 | REACTOME_GOLGI_TO_ER_RETROGRADE_TRANSPORT                         | -1.64 | 2.44 | 0 | 0 | 0 | Repressed |
| 602 | GO_BOX_H_ACA_TELOMERASE_RNP_COMPLEX                               | -1.64 | 2.36 | 0 | 0 | 0 | Repressed |
| 603 | GO_RRNA_TRANSCRIPTION                                             | -1.64 | 2.31 | 0 | 0 | 0 | Repressed |
| 604 | GO_MITOCHONDRIAL_TRNA_PROCESSING                                  | -1.64 | 2.16 | 0 | 0 | 0 | Repressed |
| 605 | GO_MRNA_PSEUDOURIDINE_SYNTHESIS                                   | -1.64 | 2.08 | 0 | 0 | 0 | Repressed |
| 606 | GO_NEGATIVE_REGULATION_OF_MEMBRANE_PROTEIN_ECTODOMAIN_PROTEOLYTI  | -1.64 | 2.05 | 0 | 0 | 0 | Repressed |
| 607 | HO_LIVER_CANCER_VASCULAR_INVASION                                 | -1.64 | 1.99 | 0 | 0 | 0 | Repressed |
| 608 | GO_SPLICEOSOMAL_TRISNRNP_COMPLEX_ASSEMBLY                         | -1.64 | 1.96 | 0 | 0 | 0 | Repressed |
| 609 | WANG_METASTASIS_OF_BREAST_CANCER_ESR1_UP                          | -1.64 | 1.85 | 0 | 0 | 0 | Repressed |
| 610 | GO_MRNA_5_UTR_BINDING                                             | -1.64 | 1.83 | 0 | 0 | 0 | Repressed |
| 611 | GO_PROTEIN_LOCALIZATION_TO_CHROMOSOME_TELOMERIC_REGION            | -1.64 | 1.83 | 0 | 0 | 0 | Repressed |
| 612 | GO_ANAPHASE_PROMOTING_COMPLEX                                     | -1.64 | 1.8  | 0 | 0 | 0 | Repressed |
| 613 | GO_U6_SNRNA_BINDING                                               | -1.64 | 1.78 | 0 | 0 | 0 | Repressed |
| 614 | GO_POSITIVE_REGULATION_OF_DNA_TEMPLATED_TRANSCRIPTION_INITIATION  | -1.64 | 1.73 | 0 | 0 | 0 | Repressed |
| 615 | ABRAMSON_INTERACT_WITH_AIRE                                       | -1.63 | 4    | 0 | 0 | 0 | Repressed |
| 616 | GO_NUCLEUS_ORGANIZATION                                           | -1.63 | 4    | 0 | 0 | 0 | Repressed |
| 617 | GO_POSITIVE_REGULATION_OF_WNT_SIGNALING_PATHWAY                   | -1.63 | 4    | 0 | 0 | 0 | Repressed |
| 618 | GO_PROTEIN_CONTAINING_COMPLEX_LOCALIZATION                        | -1.63 | 4    | 0 | 0 | 0 | Repressed |
| 619 | REACTOME_MITOCHONDRIAL_BIOGENESIS                                 | -1.63 | 4    | 0 | 0 | 0 | Repressed |
| 620 | REACTOME_SIGNALING_BY_NOTCH4                                      | -1.63 | 4    | 0 | 0 | 0 | Repressed |
| 621 | GO_ENDOCYTTIC_VESICLE_LUMEN                                       | -1.63 | 2.67 | 0 | 0 | 0 | Repressed |
| 622 | GO_REGULATION_OF_PROTEIN_EXPORT_FROM_NUCLEUS                      | -1.63 | 2.6  | 0 | 0 | 0 | Repressed |
| 623 | DAIRKEE_CANCER_PRONE_RESPONSE_BPA_E2                              | -1.63 | 2.46 | 0 | 0 | 0 | Repressed |
| 624 | GO_POSITIVE_REGULATION_OF_TRANSCRIPTION_BY_RNA_POLYMERASE_I       | -1.63 | 2.32 | 0 | 0 | 0 | Repressed |
| 625 | GO_NEGATIVE_REGULATION_OF_CHROMOSOME_SEGREGATION                  | -1.63 | 2.25 | 0 | 0 | 0 | Repressed |
| 626 | GO_REGULATION_OF_MRNA_SPLICING_VIA_SPLICEOSOME                    | -1.63 | 2.22 | 0 | 0 | 0 | Repressed |
| 627 | REACTOME_ABC_TRANSPORTER_DISORDERS                                | -1.63 | 2.22 | 0 | 0 | 0 | Repressed |
| 628 | ZHAN_VARIABLE_EARLY_DIFFERENTIATION_GENES_DN                      | -1.63 | 2.16 | 0 | 0 | 0 | Repressed |
| 629 | REACTOME_SIGNALING_BY_FGFR2_IN_DISEASE                            | -1.63 | 2.13 | 0 | 0 | 0 | Repressed |
| 630 | NAKAMURA_CANCER_MICROENVIRONMENT_DN                               | -1.63 | 2.07 | 0 | 0 | 0 | Repressed |
| 631 | GO_ADENYLATE_CYCLASE_BINDING                                      | -1.63 | 1.96 | 0 | 0 | 0 | Repressed |
| 632 | GO_AMINOACYL_TRNA_SYNTHETASE_MULTENZYME_COMPLEX                   | -1.63 | 1.93 | 0 | 0 | 0 | Repressed |
| 633 | OHASHI_AURKA_TARGETS                                              | -1.63 | 1.9  | 0 | 0 | 0 | Repressed |
| 634 | HOFFMANN_SMALL_PRE_BIL_TO_IMMATURE_B_LYMPHOCYTE_DN                | -1.63 | 1.84 | 0 | 0 | 0 | Repressed |
| 635 | REACTOME_ABORTIVE_ELONGATION_OF_HIV_1_TRANSCRIPT_IN_THE_ABSENCE_C | -1.63 | 1.84 | 0 | 0 | 0 | Repressed |
| 636 | REACTOME_PIWI_INTERACTING_RNA_PIRNA_BIOGENESIS                    | -1.63 | 1.84 | 0 | 0 | 0 | Repressed |
| 637 | GO_RNA_7_METHYLGUANOSINE_CAP_BINDING                              | -1.63 | 1.82 | 0 | 0 | 0 | Repressed |
| 638 | GO_DICARBOXYLIC_ACID_BIOSYNTHETIC_PROCESS                         | -1.63 | 1.72 | 0 | 0 | 0 | Repressed |
| 639 | GO_MATURATION_OF_5_8S_RRNA_FROM_TRICISTRONIC_RRNA_TRANSCRIPT_SSU  | -1.63 | 1.71 | 0 | 0 | 0 | Repressed |
| 640 | GO_EMBRYO_IMPLANTATION                                            | -1.63 | 1.69 | 0 | 0 | 0 | Repressed |
| 641 | NAGY_TFTC_COMPONENTS_HUMAN                                        | -1.63 | 1.63 | 0 | 0 | 0 | Repressed |
| 642 | GO_MITOTIC_SPINDLE_MIDZONE                                        | -1.63 | 1.59 | 0 | 0 | 0 | Repressed |

|     |                                                                   |       |      |   |   |   |           |
|-----|-------------------------------------------------------------------|-------|------|---|---|---|-----------|
| 643 | BLUM_RESPONSE_TO_SALIRASIB_DN                                     | -1.62 | 4    | 0 | 0 | 0 | Repressed |
| 644 | CASORELLI_ACUTE_PROMYELOCYTIC_LEUKEMIA_DN                         | -1.62 | 4    | 0 | 0 | 0 | Repressed |
| 645 | LI_DCP2_BOUND_MRNA                                                | -1.62 | 4    | 0 | 0 | 0 | Repressed |
| 646 | REACTOME_ACTIVATION_OF_HOX_GENES_DURING_DIFFERENTIATION           | -1.62 | 4    | 0 | 0 | 0 | Repressed |
| 647 | REACTOME_COPI_DEPENDENT_GOLGI_TO_ER_RETROGRADE_TRAFFIC            | -1.62 | 4    | 0 | 0 | 0 | Repressed |
| 648 | REACTOME_INFECTIOUS_DISEASE                                       | -1.62 | 4    | 0 | 0 | 0 | Repressed |
| 649 | REACTOME_TCR_SIGNALING                                            | -1.62 | 4    | 0 | 0 | 0 | Repressed |
| 650 | REACTOME_FORMATION_OF_THE_EARLY_ELONGATION_COMPLEX                | -1.62 | 2.6  | 0 | 0 | 0 | Repressed |
| 651 | HU_GENOTOXIN_ACTION_DIRECT_VS_INDIRECT_24HR                       | -1.62 | 2.59 | 0 | 0 | 0 | Repressed |
| 652 | LIJ_COMMON_CANCER_GENES                                           | -1.62 | 2.55 | 0 | 0 | 0 | Repressed |
| 653 | REACTOME_SUMOYLATION_OF_RNA_BINDING_PROTEINS                      | -1.62 | 2.24 | 0 | 0 | 0 | Repressed |
| 654 | GO_ESTABLISHMENT_OF_MITOTIC_SPINDLE_LOCALIZATION                  | -1.62 | 2.01 | 0 | 0 | 0 | Repressed |
| 655 | GO_MITOCHONDRIAL_RNA_MODIFICATION                                 | -1.62 | 1.89 | 0 | 0 | 0 | Repressed |
| 656 | REACTOME_SUMOYLATION_OF_SUMOYLATION_PROTEINS                      | -1.62 | 1.87 | 0 | 0 | 0 | Repressed |
| 657 | GO_RNA_POLYMERASE_III_COMPLEX                                     | -1.62 | 1.85 | 0 | 0 | 0 | Repressed |
| 658 | YUAN_ZNF143_PARTNERS                                              | -1.62 | 1.83 | 0 | 0 | 0 | Repressed |
| 659 | GO_REGULATION_OF_MYELINATION                                      | -1.62 | 1.81 | 0 | 0 | 0 | Repressed |
| 660 | MULLIGAN_NTF3_SIGNALING_VIA_INSR_AND_IGF1R_UP                     | -1.62 | 1.8  | 0 | 0 | 0 | Repressed |
| 661 | GO_REGULATION_OF_CELL_MATURATION                                  | -1.62 | 1.59 | 0 | 0 | 0 | Repressed |
| 662 | BENPORATH_CYCLING_GENES                                           | -1.61 | 4    | 0 | 0 | 0 | Repressed |
| 663 | CHANG_CORE_SERUM_RESPONSE_UP                                      | -1.61 | 4    | 0 | 0 | 0 | Repressed |
| 664 | GO_CONDENSED_CHROMOSOME                                           | -1.61 | 4    | 0 | 0 | 0 | Repressed |
| 665 | GO_FIBRILLAR_CENTER                                               | -1.61 | 4    | 0 | 0 | 0 | Repressed |
| 666 | GO_MICROTUBULE                                                    | -1.61 | 4    | 0 | 0 | 0 | Repressed |
| 667 | GO_PLASMA_MEMBRANE_BOUNDED_CELL_PROJECTION_CYTOPLASM              | -1.61 | 4    | 0 | 0 | 0 | Repressed |
| 668 | GO_U4_SNRNA_BINDING                                               | -1.61 | 4    | 0 | 0 | 0 | Repressed |
| 669 | KIM_WT1_TARGETS_12HR_DN                                           | -1.61 | 4    | 0 | 0 | 0 | Repressed |
| 670 | LU_AGING_BRAIN_DN                                                 | -1.61 | 4    | 0 | 0 | 0 | Repressed |
| 671 | MYC_UP.V1_UP                                                      | -1.61 | 4    | 0 | 1 | 0 | Repressed |
| 672 | REACTOME_GLUCOSE_METABOLISM                                       | -1.61 | 4    | 0 | 0 | 0 | Repressed |
| 673 | YAO_TEMPORAL_RESPONSE_TO_PROGESTERONE_CLUSTER_7                   | -1.61 | 2.55 | 0 | 0 | 0 | Repressed |
| 674 | SERVITJA_LIVER_HNF1A_TARGETS_UP                                   | -1.61 | 2.51 | 0 | 0 | 0 | Repressed |
| 675 | GO_NEGATIVE_REGULATION_OF_MEIOTIC_NUCLEAR_DIVISION                | -1.61 | 2.37 | 0 | 0 | 0 | Repressed |
| 676 | BHATI_G2M_ARREST_BY_2METHOXYESTRADIOL_UP                          | -1.61 | 2.21 | 0 | 0 | 0 | Repressed |
| 677 | GAJATE_RESPONSE_TO TRABECTEDIN_DN                                 | -1.61 | 2.13 | 0 | 0 | 0 | Repressed |
| 678 | REACTOME_NOTCH3_INTRACELLULAR_DOMAIN_REGULATES_TRANSCRIPTION      | -1.61 | 2.04 | 0 | 0 | 0 | Repressed |
| 679 | REACTOME_DISEASES_ASSOCIATED_WITH_O_GLYCOSYLATION_OF_PROTEINS     | -1.61 | 2    | 0 | 0 | 0 | Repressed |
| 680 | GO_TFIID_CLASS_TRANSCRIPTION_FACTOR_COMPLEX_BINDING               | -1.61 | 1.98 | 0 | 0 | 0 | Repressed |
| 681 | KOMMAGANI_TP63_GAMMA_TARGETS                                      | -1.61 | 1.9  | 0 | 0 | 0 | Repressed |
| 682 | GO_PROTEIN_LOCALIZATION_TO_NUCLEOLUS                              | -1.61 | 1.88 | 0 | 0 | 0 | Repressed |
| 683 | GO_RIBOSOMAL_LARGE_SUBUNIT_ASSEMBLY                               | -1.61 | 1.83 | 0 | 0 | 0 | Repressed |
| 684 | OHASHI_AURKB_TARGETS                                              | -1.61 | 1.82 | 0 | 0 | 0 | Repressed |
| 685 | GO_REGULATION_OF_NUCLEOBASE_CONTAINING_COMPOUND_TRANSPORT         | -1.61 | 1.75 | 0 | 0 | 0 | Repressed |
| 686 | CHR1Q43                                                           | -1.61 | 1.71 | 0 | 0 | 0 | Repressed |
| 687 | GO_POSITIVE_REGULATION_OF_BEHAVIOR                                | -1.61 | 1.7  | 0 | 0 | 0 | Repressed |
| 688 | BIOCARTA_NPC_PATHWAY                                              | -1.61 | 1.68 | 0 | 0 | 0 | Repressed |
| 689 | GO_CLATHRIN_COAT_ASSEMBLY                                         | -1.61 | 1.67 | 0 | 0 | 0 | Repressed |
| 690 | GO_SPINDLE_ELONGATION                                             | -1.61 | 1.62 | 0 | 0 | 0 | Repressed |
| 691 | BENPORATH_ES_1                                                    | -1.60 | 4    | 0 | 0 | 0 | Repressed |
| 692 | GO_CARDIAC_MUSCLE_CELL_DIFFERENTIATION                            | -1.60 | 4    | 0 | 0 | 0 | Repressed |
| 693 | GO_POSTTRANSCRIPTIONAL_REGULATION_OF_GENE_EXPRESSION              | -1.60 | 4    | 0 | 0 | 0 | Repressed |
| 694 | GO_REGULATION_OF_REPRODUCTIVE_PROCESS                             | -1.60 | 4    | 0 | 0 | 0 | Repressed |
| 695 | PAL_PMT5_TARGETS_UP                                               | -1.60 | 4    | 0 | 0 | 0 | Repressed |
| 696 | REACTOME_ANTIGEN_PROCESSING_UBIQUITINATION_PROTEASOME_DEGRADATION | -1.60 | 4    | 0 | 0 | 0 | Repressed |
| 697 | REACTOME_SIGNALING_BY_WNT                                         | -1.60 | 4    | 0 | 0 | 0 | Repressed |
| 698 | GO_BOX_C_D_SNRNP_COMPLEX                                          | -1.60 | 2.67 | 0 | 0 | 0 | Repressed |
| 699 | ITO_PTTG1_TARGETS_DN                                              | -1.60 | 2.36 | 0 | 0 | 0 | Repressed |
| 700 | REACTOME_MAPK_FAMILY_SIGNALING_CASCADES                           | -1.60 | 2.32 | 0 | 0 | 0 | Repressed |
| 701 | CROSBY_E2F4_TARGETS                                               | -1.60 | 2.19 | 0 | 0 | 0 | Repressed |
| 702 | BYSTROEM_CORRELATED_WITH_IL5_DN                                   | -1.60 | 2.08 | 0 | 0 | 0 | Repressed |
| 703 | GO_EXTRINSIC_COMPONENT_OF_POSTSYNAPTIC_MEMBRANE                   | -1.60 | 2.06 | 0 | 0 | 0 | Repressed |
| 704 | GO_MEIOTIC_CELL_CYCLE_CHECKPOINT                                  | -1.60 | 2.06 | 0 | 0 | 1 | Repressed |
| 705 | BIOCARTA_AKAP95_PATHWAY                                           | -1.60 | 1.96 | 0 | 0 | 0 | Repressed |
| 706 | GO_RNA_POLYMERASE_I_ACTIVITY                                      | -1.60 | 1.89 | 0 | 0 | 0 | Repressed |
| 707 | GO_MATURATION_OF_5_8S_RRNA                                        | -1.60 | 1.82 | 0 | 0 | 0 | Repressed |
| 708 | PID_RANBP2_PATHWAY                                                | -1.60 | 1.78 | 0 | 0 | 0 | Repressed |
| 709 | GO_PROTEIN_SERINE_THREONINE_KINASE_ACTIVATOR_ACTIVITY             | -1.60 | 1.77 | 0 | 0 | 0 | Repressed |
| 710 | BERENJENO_TRANSFORMED_BY_RHOA_REVERSIBLY_DN                       | -1.60 | 1.71 | 0 | 0 | 0 | Repressed |
| 711 | GO_ANTERIOR_POSTERIOR_AXIS_SPECIFICATION                          | -1.60 | 1.7  | 0 | 0 | 0 | Repressed |
| 712 | PID_RETINOIC_ACID_PATHWAY                                         | -1.60 | 1.66 | 0 | 0 | 0 | Repressed |
| 713 | GO_CHROMOSOMAL_REGION                                             | -1.59 | 4    | 0 | 0 | 0 | Repressed |
| 817 | GO_MITOTIC_CELL_CYCLE                                             | -1.55 | 4    | 0 | 0 | 1 | Repressed |
| 818 | GO_REGULATION_OF_CELL_CYCLE_G2_M_PHASE_TRANSITION                 | -1.55 | 4    | 0 | 0 | 1 | Repressed |
| 716 | RAMALHO_STEMNESS_UP                                               | -1.59 | 4    | 0 | 0 | 0 | Repressed |
| 717 | SENESE_HDAC1_TARGETS_UP                                           | -1.59 | 4    | 0 | 0 | 0 | Repressed |
| 718 | GO_TELOMERE_MAINTENANCE_VIA_TELOMERE_LENGTHENING                  | -1.59 | 2.49 | 0 | 0 | 0 | Repressed |
| 719 | BERNARD_PPAPDC1B_TARGETS_DN                                       | -1.59 | 2.06 | 0 | 0 | 0 | Repressed |
| 720 | GO_T_CELL_EXTRAVASATION                                           | -1.59 | 2.06 | 0 | 0 | 0 | Repressed |
| 721 | MOREAUX_B_LYMPHOCYTE_MATURATION_BY_TACI_DN                        | -1.59 | 2.03 | 0 | 0 | 0 | Repressed |
| 722 | GO_POSITIVE_REGULATION_OF_CELL_DIVISION                           | -1.59 | 1.96 | 0 | 0 | 0 | Repressed |
| 723 | GO_REGULATION_OF_PHOSPHOPROTEIN_PHOSPHATASE_ACTIVITY              | -1.59 | 1.91 | 0 | 0 | 0 | Repressed |
| 724 | GO_MICROTUBULE_PLUS_END_BINDING                                   | -1.59 | 1.86 | 0 | 0 | 0 | Repressed |
| 725 | REACTOME_REGULATION_OF_SIGNALING_BY_CBL                           | -1.59 | 1.79 | 0 | 0 | 0 | Repressed |
| 726 | GO_MITOTIC_SISTER_CHROMATID_COHESION                              | -1.59 | 1.74 | 0 | 0 | 0 | Repressed |
| 727 | GO_REGULATION_OF_MRNA_3_END_PROCESSING                            | -1.59 | 1.7  | 0 | 0 | 0 | Repressed |
| 728 | GO_POSITIVE_REGULATION_OF_UBIQUITIN_PROTEIN_TRANSFERASE_ACTIVITY  | -1.59 | 1.68 | 0 | 0 | 0 | Repressed |
| 729 | GO_CDP_DIACYLGLYCEROL_BIOSYNTHETIC_PROCESS                        | -1.59 | 1.66 | 0 | 0 | 0 | Repressed |
| 730 | GO_RIBONUCLEOSIDE_MONOPHOSPHATE_BIOSYNTHETIC_PROCESS              | -1.59 | 1.64 | 0 | 0 | 0 | Repressed |
| 731 | PID_TCR_JNK_PATHWAY                                               | -1.59 | 1.6  | 0 | 0 | 0 | Repressed |
| 732 | GO_POSITIVE_REGULATION_OF_MRNA_3_END_PROCESSING                   | -1.59 | 1.59 | 0 | 0 | 0 | Repressed |
| 733 | GO_PEPTIDYL_SERINE_MODIFICATION                                   | -1.58 | 4    | 0 | 0 | 0 | Repressed |
| 734 | LEE_LIVER_CANCER_SURVIVAL_DN                                      | -1.58 | 4    | 0 | 0 | 0 | Repressed |
| 735 | REACTOME_CELLULAR_RESPONSES_TO_STRESS                             | -1.58 | 4    | 0 | 0 | 0 | Repressed |
| 736 | WANG_TUMOR_INVASIVENESS_UP                                        | -1.58 | 4    | 0 | 0 | 0 | Repressed |
| 737 | REACTOME_DISORDERS_OF_TRANSMEMBRANE_TRANSPORTERS                  | -1.58 | 2.46 | 0 | 0 | 0 | Repressed |
| 738 | THUM_SYSTOLIC_HEART_FAILURE_DN                                    | -1.58 | 2.39 | 0 | 0 | 0 | Repressed |
| 741 | ACOSTA_PROLIFERATION_INDEPENDENT_MYC_TARGETS_UP                   | -1.58 | 2.21 | 0 | 1 | 0 | Repressed |
| 740 | GO_POSITIVE_REGULATION_OF_NUCLEOCYTOPLASMIC_TRANSPORT             | -1.58 | 2.27 | 0 | 0 | 0 | Repressed |
| 739 | ALFANO_MYC_TARGETS                                                | -1.58 | 2.35 | 0 | 0 | 0 | Repressed |
| 742 | KEGG_LONG_TERM_POTENTIATION                                       | -1.58 | 2.09 | 0 | 0 | 0 | Repressed |
| 743 | GO_PROTEIN_SERINE_THREONINE_PHOSPHATASE_COMPLEX                   | -1.58 | 2    | 0 | 0 | 0 | Repressed |
| 744 | GENTILE_UV_LOW_DOSE_DN                                            | -1.58 | 1.97 | 0 | 0 | 0 | Repressed |
| 745 | GO_NEGATIVE_REGULATION_OF_RNA_METABOLIC_PROCESS                   | -1.58 | 1.97 | 0 | 0 | 0 | Repressed |
| 746 | REACTOME_RAF_ACTIVATION                                           | -1.58 | 1.91 | 0 | 0 | 0 | Repressed |
| 747 | GO_REGULATION_OF_TRANSCRIPTION_BY_RNA_POLYMERASE_I                | -1.58 | 1.89 | 0 | 0 | 0 | Repressed |
| 748 | GO_POSITIVE_REGULATION_OF_MRNA_PROCESSING                         | -1.58 | 1.87 | 0 | 0 | 0 | Repressed |
| 749 | GO_NEGATIVE_REGULATION_OF_PATHWAY_RESTRICTED_SMAD_PROTEIN_PHOSP   | -1.58 | 1.85 | 0 | 0 | 0 | Repressed |
| 750 | GO_NEGATIVE_REGULATION_OF_CALCIIUM_MEDIATED_SIGNALING             | -1.58 | 1.7  | 0 | 0 | 0 | Repressed |
| 751 | GO_SPLICEOSOMAL_TRI_SNRNP_COMPLEX                                 | -1.58 | 1.7  | 0 | 0 | 0 | Repressed |

|     |                                                                         |       |      |   |   |   |                 |
|-----|-------------------------------------------------------------------------|-------|------|---|---|---|-----------------|
| 996 | GO_CELL_CYCLE_PHASE_TRANSITION                                          | -1.50 | 4    | 0 | 0 | 1 | Repressed       |
| 753 | GO_RIBOSOME_BINDING                                                     | -1.58 | 1.69 | 0 | 0 | 0 | Repressed       |
| 754 | GO_EMBRYONIC_CLEAVAGE                                                   | -1.58 | 1.63 | 0 | 0 | 0 | Repressed       |
| 755 | GO_POSITIVE_REGULATION_OF_TELOMERASE_ACTIVITY                           | -1.58 | 1.55 | 0 | 0 | 0 | Repressed       |
| 756 | GO_POSITIVE_REGULATION_OF_TRANSCRIPTION_OF_NOTCH_RECEPTOR_TARGET        | -1.58 | 1.53 | 0 | 0 | 0 | Repressed       |
| 757 | GO_SYNAPSE_MATURATION                                                   | -1.58 | 1.53 | 0 | 0 | 0 | Repressed       |
| 758 | BIOCARTA_LIS1_PATHWAY                                                   | -1.58 | 1.47 | 0 | 0 | 0 | Repressed       |
| 759 | GO_ALPHA_ACTININ_BINDING                                                | -1.58 | 1.47 | 0 | 0 | 0 | Repressed       |
| 760 | GO_CELLULAR_RESPONSE_TO_ARSENIC_CONTAINING_SUBSTANCE                    | -1.58 | 1.45 | 0 | 0 | 0 | Repressed       |
| 761 | CSR_LATE_UP_V1_UP                                                       | -1.57 | 4    | 0 | 0 | 0 | Repressed       |
| 762 | GO_PURINE_NTP_DEPENDENT_HELICASE_ACTIVITY                               | -1.57 | 4    | 0 | 0 | 0 | Repressed       |
| 763 | GO_REGULATION_OF_CHROMOSOME_ORGANIZATION                                | -1.57 | 4    | 0 | 0 | 0 | Repressed       |
| 764 | GO_ANTIGEN_PROCESSING_AND_PRESENTATION_OF_PEPTIDE_OR_POLYSACCHARIDE     | -1.57 | 2.24 | 0 | 0 | 0 | Repressed       |
| 765 | GO_RNA_DEPENDENT_DNA_BIOSYNTHETIC_PROCESS                               | -1.57 | 2.24 | 0 | 0 | 0 | Repressed       |
| 766 | GO_REGULATION_OF_MICROTUBULE_MOTOR_ACTIVITY                             | -1.57 | 2.08 | 0 | 0 | 0 | Repressed       |
| 767 | GO_METAPHASE_PLATE_CONGRESSION                                          | -1.57 | 2.05 | 0 | 0 | 0 | Repressed       |
| 768 | BIOCARTA_PPARG_PATHWAY                                                  | -1.57 | 1.9  | 0 | 0 | 0 | Repressed       |
| 769 | REACTOME_ACTIVATION_OF_RAC1_DOWNSTREAM_OF_NMDARS                        | -1.57 | 1.89 | 0 | 0 | 0 | Repressed       |
| 770 | JIANG_AGING_CEREBRAL_CORTEX_DN                                          | -1.57 | 1.81 | 0 | 0 | 0 | Repressed       |
| 771 | GO_NONHOMOLOGOUS_END_JOINING_COMPLEX                                    | -1.57 | 1.75 | 0 | 0 | 0 | Repressed       |
| 772 | WANG_TARGETS_OF_MLL_CBP_FUSION_DN                                       | -1.57 | 1.75 | 0 | 0 | 0 | Repressed       |
| 773 | REACTOME_POLO_LIKE_KINASE_MEDIATED_EVENTS                               | -1.57 | 1.68 | 0 | 0 | 0 | Repressed       |
| 774 | GO_RNA_CAP_BINDING_COMPLEX                                              | -1.57 | 1.62 | 0 | 0 | 0 | Repressed       |
| 775 | GO_DNA_HELICASE_COMPLEX                                                 | -1.57 | 1.61 | 0 | 0 | 0 | Repressed       |
| 776 | REACTOME_RECYCLING_PATHWAY_OF_L1                                        | -1.57 | 1.58 | 0 | 0 | 0 | Repressed       |
| 777 | GO_RESPONSE_TO_MORPHINE                                                 | -1.57 | 1.51 | 0 | 0 | 0 | Repressed       |
| 778 | GO_TRNA_5_END_PROCESSING                                                | -1.57 | 1.45 | 0 | 0 | 0 | Repressed       |
| 779 | GO_IMP_BIOSYNTHETIC_PROCESS                                             | -1.57 | 1.44 | 0 | 0 | 0 | Repressed       |
| 780 | MANN_RESPONSE_TO_AMIFOSTINE_DN                                          | -1.57 | 1.35 | 0 | 0 | 0 | Repressed       |
| 714 | GO_REGULATION_OF_CELL_CYCLE_PHASE_TRANSITION                            | -1.49 | 4    | 0 | 0 | 0 | not significant |
| 782 | DUTERTRE_ESTRADIOL_RESPONSE_6HR_UP                                      | -1.56 | 4    | 0 | 0 | 0 | Repressed       |
| 783 | GO_CADHERIN_BINDING                                                     | -1.56 | 4    | 0 | 0 | 0 | Repressed       |
| 715 | GO_REGULATION_OF_CELL_CYCLE_PROCESS                                     | -1.49 | 4    | 0 | 0 | 0 | not significant |
| 785 | GO_ORGANELLE_FISSION                                                    | -1.56 | 4    | 0 | 0 | 0 | Repressed       |
| 786 | GO_STEM_CELL_DIFFERENTIATION                                            | -1.56 | 4    | 0 | 0 | 0 | Repressed       |
| 787 | MARKEY_RB1_ACUTE_LOF_UP                                                 | -1.56 | 4    | 0 | 0 | 0 | Repressed       |
| 788 | MOREAUX_MULTIPLE_MYELOMA_BY_TACI_DN                                     | -1.56 | 4    | 0 | 0 | 0 | Repressed       |
| 789 | REACTOME_CELL_CYCLE                                                     | -1.56 | 4    | 0 | 0 | 0 | Repressed       |
| 790 | ZHANG_BREAST_CANCER_PROGENITORS_UP                                      | -1.56 | 4    | 0 | 0 | 0 | Repressed       |
| 791 | GO_PEPTIDYL_THREONINE_MODIFICATION                                      | -1.56 | 2.5  | 0 | 0 | 0 | Repressed       |
| 792 | GO_TRANSLATION_REGULATOR_ACTIVITY_NUCLEIC_ACID_BINDING                  | -1.56 | 2.48 | 0 | 0 | 0 | Repressed       |
| 793 | GO_TRANSCRIPTION_ELONGATION_FROM_RNA_POLYMERASE_II_PROMOTER             | -1.56 | 2.46 | 0 | 0 | 0 | Repressed       |
| 794 | MCBRYAN_PUBERTAL_BREAST_6_7WK_DN                                        | -1.56 | 2.06 | 0 | 0 | 0 | Repressed       |
| 795 | MORI_IMMATURE_B_LYMPHOCYTE_DN                                           | -1.56 | 2.01 | 0 | 0 | 0 | Repressed       |
| 796 | NADERI_BREAST_CANCER_PROGNOSIS_UP                                       | -1.56 | 1.99 | 0 | 0 | 0 | Repressed       |
| 797 | GO_AXONAL_TRANSPORT                                                     | -1.56 | 1.87 | 0 | 0 | 0 | Repressed       |
| 798 | GO_MAINTENANCE_OF_CENTROSOME_LOCATION                                   | -1.56 | 1.84 | 0 | 0 | 0 | Repressed       |
| 799 | GO_REGULATION_OF_SPINDLE_ORGANIZATION                                   | -1.56 | 1.81 | 0 | 0 | 0 | Repressed       |
| 800 | GO_POSITIVE_REGULATION_OF_INTERFERON_BETA_PRODUCTION                    | -1.56 | 1.75 | 0 | 0 | 0 | Repressed       |
| 801 | GO_PHOSPHOTYROSINE_RESIDUE_BINDING                                      | -1.56 | 1.74 | 0 | 0 | 0 | Repressed       |
| 802 | GO_PROTEIN_LOCALIZATION_TO_NUCLEAR_ENVELOPE                             | -1.56 | 1.72 | 0 | 0 | 0 | Repressed       |
| 803 | REACTOME_ROLE_OF_ABL_IN_ROBO_SLIT_SIGNALING                             | -1.56 | 1.72 | 0 | 0 | 0 | Repressed       |
| 804 | GO_AP_2_ADAPTOR_COMPLEX_BINDING                                         | -1.56 | 1.71 | 0 | 0 | 0 | Repressed       |
| 805 | GO_EXTRINSIC_COMPONENT_OF_SYNAPTIC_MEMBRANE                             | -1.56 | 1.67 | 0 | 0 | 0 | Repressed       |
| 806 | GO_NEGATIVE_REGULATION_OF_PRI_MIRNA_TRANSCRIPTION_BY_RNA_POLYMERASE     | -1.56 | 1.66 | 0 | 0 | 0 | Repressed       |
| 807 | GO_POSITIVE_REGULATION_OF_CHEMOKINE_C_X_C_MOTIF_LIGAND_2_PRODUCTION     | -1.56 | 1.66 | 0 | 0 | 0 | Repressed       |
| 808 | SUH_COEXPRESSED_WITH_ID1_AND_ID2_UP                                     | -1.56 | 1.62 | 0 | 0 | 0 | Repressed       |
| 809 | GO_CYTOSOLIC_DYNEIN_COMPLEX                                             | -1.56 | 1.6  | 0 | 0 | 0 | Repressed       |
| 810 | REACTOME_RECYCLING_OF EIF2:GDP                                          | -1.56 | 1.58 | 0 | 0 | 0 | Repressed       |
| 811 | GO_PSEUDOURIDINE_SYNTHESIS                                              | -1.56 | 1.54 | 0 | 0 | 0 | Repressed       |
| 812 | CAFFAREL_RESPONSE_TO_THC_24HR_3_DN                                      | -1.56 | 1.39 | 0 | 0 | 0 | Repressed       |
| 813 | CHR2Q36                                                                 | -1.56 | 1.38 | 0 | 0 | 0 | Repressed       |
| 814 | GO_SEROTOLI_CELL_DIFFERENTIATION                                        | -1.56 | 1.27 | 0 | 0 | 0 | Repressed       |
| 993 | COLLER_MYC_TARGETS_UP                                                   | -1.41 | 1.14 | 0 | 0 | 0 | Repressed       |
| 816 | GO_MICROTUBULE_CYTOSKELETON_ORGANIZATION                                | -1.55 | 4    | 0 | 0 | 0 | Repressed       |
| 781 | GO_REGULATION_OF_MEIOTIC_CELL_CYCLE                                     | -1.37 | 1.05 | 0 | 0 | 0 | not significant |
| 784 | GO_CELL_CYCLE_PROCESS                                                   | -1.36 | 4    | 0 | 0 | 0 | not significant |
| 819 | GO_REGULATION_OF_NUCLEAR_DIVISION                                       | -1.55 | 4    | 0 | 0 | 0 | Repressed       |
| 820 | OUELLET_OVARIAN_CANCER_INVASIVE_VS_LMP_UP                               | -1.55 | 4    | 0 | 0 | 0 | Repressed       |
| 821 | REACTOME_MITOCHONDRIAL_TRANSLATION                                      | -1.55 | 4    | 0 | 0 | 0 | Repressed       |
| 822 | REACTOME_TRANSCRIPTIONAL_REGULATION_BY_RUNX1                            | -1.55 | 4    | 0 | 0 | 0 | Repressed       |
| 823 | RICKMAN_TUMOR_DIFFERENTIATED_WELL_VS_POORLY_DN                          | -1.55 | 4    | 0 | 0 | 0 | Repressed       |
| 824 | REACTOME_SWITCHING_OF_ORIGINS_TO_A_POST_REPLICATIVE_STATE               | -1.55 | 2.21 | 0 | 0 | 0 | Repressed       |
| 825 | VANTVEER_BREAST_CANCER_METASTASIS_DN                                    | -1.55 | 2.19 | 0 | 0 | 0 | Repressed       |
| 826 | GO_NUCLEAR_RECEPTOR_TRANSCRIPTION_COACTIVATOR_ACTIVITY                  | -1.55 | 1.86 | 0 | 0 | 0 | Repressed       |
| 827 | GO_REGULATION_OF_DNA_DUPLEX_UNWINDING                                   | -1.55 | 1.8  | 0 | 0 | 0 | Repressed       |
| 828 | GO_MEIOTIC_CELL_CYCLE_PROCESS                                           | -1.35 | 1.76 | 0 | 0 | 0 | not significant |
| 829 | GO_MITOTIC_SPINDLE_MIDZONE_ASSEMBLY                                     | -1.55 | 1.63 | 0 | 0 | 0 | Repressed       |
| 830 | GARGALOVIC_RESPONSE_TO_OXIDIZED_PHOSPHOLIPIDS_TURQUOISE_DN              | -1.55 | 1.6  | 0 | 0 | 0 | Repressed       |
| 831 | GO_POSITIVE_REGULATION_OF_APOPTOSIS                                     | -1.55 | 1.6  | 0 | 0 | 0 | Repressed       |
| 832 | GO_IRRES_DEPENDENT_VIRAL_TRANSLATIONAL_INITIATION                       | -1.55 | 1.58 | 0 | 0 | 0 | Repressed       |
| 833 | BIOCARTA_EFP_PATHWAY                                                    | -1.55 | 1.57 | 0 | 0 | 0 | Repressed       |
| 834 | GO_NEGATIVE_REGULATION_OF_RNA_SPLICING                                  | -1.55 | 1.54 | 0 | 0 | 0 | Repressed       |
| 835 | GO_NITRIC_OXIDE_SYNTHASE_BIOSYNTHETIC_PROCESS                           | -1.55 | 1.51 | 0 | 0 | 0 | Repressed       |
| 836 | SCHLOSSER_MYC_AND_SERUM_RESPONSE_SYNERGY                                | -1.55 | 1.5  | 0 | 0 | 0 | Repressed       |
| 837 | KEGG_DORSO_VENTRAL_AXIS_FORMATIO                                        | -1.55 | 1.49 | 0 | 0 | 0 | Repressed       |
| 838 | GO_PSEUDOPODIUM                                                         | -1.55 | 1.45 | 0 | 0 | 0 | Repressed       |
| 839 | GO_RESPONSE_TO_MANGANESE_ION                                            | -1.55 | 1.43 | 0 | 0 | 0 | Repressed       |
| 840 | CHEOK_RESPONSE_TO_MERCAPTOPYRINE_UP                                     | -1.55 | 1.4  | 0 | 0 | 0 | Repressed       |
| 841 | GO_CENTROMERIC_SISTER_CHROMATID_COHESION                                | -1.55 | 1.36 | 0 | 0 | 0 | Repressed       |
| 842 | GO_NEGATIVE_REGULATION_OF_CHROMOSOME_ORGANIZATION                       | -1.54 | 4    | 0 | 0 | 0 | Repressed       |
| 843 | GO_REGULATION_OF_CELL_CYCLE                                             | -1.34 | 4    | 0 | 0 | 0 | not significant |
| 844 | REACTOME_INTERLEUKIN_1_SIGNALING                                        | -1.54 | 4    | 0 | 0 | 0 | Repressed       |
| 845 | REACTOME_NEUROTRANSMITTER_RECEPTORS_AND_POSTSYNAPTIC_SIGNALING          | -1.54 | 4    | 0 | 0 | 0 | Repressed       |
| 846 | KEGG_PURINE_METABOLISM                                                  | -1.50 | 2.45 | 1 | 0 | 0 | Repressed       |
| 847 | GO_BASAL_TRANSCRIPTION_MACHINERY_BINDING                                | -1.54 | 2.24 | 0 | 0 | 0 | Repressed       |
| 848 | GO_SNORNA_LOCALIZATION                                                  | -1.54 | 2.2  | 0 | 0 | 0 | Repressed       |
| 849 | GO_REGULATION_OF_TELOMERE_MAINTENANCE                                   | -1.54 | 1.94 | 0 | 0 | 0 | Repressed       |
| 850 | GO_TRNA_BINDING                                                         | -1.54 | 1.94 | 0 | 0 | 0 | Repressed       |
| 851 | GO_TERMINATION_OF_RNA_POLYMERASE_II_TRANSCRIPTION                       | -1.54 | 1.88 | 0 | 0 | 0 | Repressed       |
| 852 | GO_SNRNA_MODIFICATION                                                   | -1.54 | 1.85 | 0 | 0 | 0 | Repressed       |
| 853 | GO_ENDORIBONUCLEASE_ACTIVITY_PRODUCING_5_PHOSPHOMONOESTERS              | -1.54 | 1.83 | 0 | 0 | 0 | Repressed       |
| 854 | REACTOME_MOLYBDENUM_COFACTOR_BIOSYNTHESIS                               | -1.54 | 1.83 | 0 | 0 | 0 | Repressed       |
| 855 | GO_ADENYLATE_CYCLASE_ACTIVATOR_ACTIVITY                                 | -1.54 | 1.82 | 0 | 0 | 0 | Repressed       |
| 856 | PID_RAS_PATHWAY                                                         | -1.54 | 1.77 | 0 | 0 | 0 | Repressed       |
| 857 | REACTOME_RNA_POLYMERASE_III_TRANSCRIPTION                               | -1.54 | 1.77 | 0 | 0 | 0 | Repressed       |
| 858 | GO_REGULATION_OF_MITOCHONDRIAL_ATP_SYNTHESIS_COUPLED_ELECTRON_TRANSPORT | -1.54 | 1.71 | 0 | 0 | 0 | Repressed       |
| 859 | GO_CORNIFIED_ENVELOPE                                                   | -1.54 | 1.66 | 0 | 0 | 0 | Repressed       |
| 860 | GO_TERMINATION_OF_RNA_POLYMERASE_I_TRANSCRIPTION                        | -1.54 | 1.62 | 0 | 0 | 0 | Repressed       |

|     |                                                                     |       |      |   |   |   |                 |
|-----|---------------------------------------------------------------------|-------|------|---|---|---|-----------------|
| 861 | CHR9Q33                                                             | -1.54 | 1.61 | 0 | 0 | 0 | Repressed       |
| 862 | REACTOME_Glutamate_and_Glutamine_Metabolism                         | -1.54 | 1.61 | 0 | 0 | 0 | Repressed       |
| 863 | REACTOME_Triglyceride_Catabolism                                    | -1.54 | 1.6  | 0 | 0 | 0 | Repressed       |
| 864 | GO_RNA_Polymerase_III_Activity                                      | -1.54 | 1.59 | 0 | 0 | 0 | Repressed       |
| 865 | GO_Pathway_Restricted_Smad_Protein_Phosphorylation                  | -1.54 | 1.58 | 0 | 0 | 0 | Repressed       |
| 866 | GO_Nucleoside_Diphosphate_Kinase_Activity                           | -1.54 | 1.53 | 0 | 0 | 0 | Repressed       |
| 867 | GO_RNA_Stem_Loop_Binding                                            | -1.54 | 1.52 | 0 | 0 | 0 | Repressed       |
| 868 | GO_Cell_Cortex_Region                                               | -1.54 | 1.49 | 0 | 0 | 0 | Repressed       |
| 869 | GO_Regulation_of_Oocyte_Maturation                                  | -1.54 | 1.48 | 0 | 0 | 0 | Repressed       |
| 870 | GO_Regulation_of_Synapse_Maturation                                 | -1.54 | 1.48 | 0 | 0 | 0 | Repressed       |
| 871 | GO_Ribonuclease_P_Complex                                           | -1.54 | 1.48 | 0 | 0 | 0 | Repressed       |
| 872 | MOOHA_Glycolysis                                                    | -1.54 | 1.44 | 0 | 0 | 0 | Repressed       |
| 873 | NIKOLSKY_Breast_Cancer_10Q22_Amplicon                               | -1.54 | 1.44 | 0 | 0 | 0 | Repressed       |
| 874 | TOMIDA_Metastasis_Up                                                | -1.54 | 1.42 | 0 | 0 | 0 | Repressed       |
| 875 | VALK_AML_Cluster_16                                                 | -1.54 | 1.39 | 0 | 0 | 0 | Repressed       |
| 876 | NAKAMURA_Cancer_Microenvironment_Up                                 | -1.54 | 1.38 | 0 | 0 | 0 | Repressed       |
| 877 | LIANG_Silenced_By_Methylation_Dn                                    | -1.54 | 1.37 | 0 | 0 | 0 | Repressed       |
| 878 | NIELSEN_Malignant_Fibrous_Histiocytoma_Up                           | -1.54 | 1.37 | 0 | 0 | 0 | Repressed       |
| 879 | GLINSKY_Cancer_Death_Up                                             | -1.54 | 1.35 | 0 | 0 | 0 | Repressed       |
| 880 | GO_Positive_Regulation_of_Nucleobase-Containing_Compound_Transp     | -1.54 | 1.35 | 0 | 0 | 0 | Repressed       |
| 881 | GEORGES_Cell_Cycle_Mir192_Targets                                   | -1.34 | 1.12 | 0 | 0 | 0 | not significant |
| 882 | GO_Hematopoietic_Progenitor_Cell_Differentiation                    | -1.53 | 4    | 0 | 0 | 0 | Repressed       |
| 883 | GO_Spliceosomal_Complex                                             | -1.53 | 4    | 0 | 0 | 0 | Repressed       |
| 884 | REACTOME_Signaling_By_Rho_GTPases                                   | -1.53 | 4    | 0 | 0 | 0 | Repressed       |
| 885 | RPS14_DN.V1_DN                                                      | -1.53 | 4    | 0 | 0 | 0 | Repressed       |
| 886 | DAZARD_UV_Response_Cluster_G6                                       | -1.53 | 2.43 | 0 | 0 | 0 | Repressed       |
| 887 | GO_Translation_Regulator_Activity                                   | -1.53 | 2.43 | 0 | 0 | 0 | Repressed       |
| 888 | GO_Regulation_of_DePhosphorylation                                  | -1.53 | 2.41 | 0 | 0 | 0 | Repressed       |
| 889 | SCIBETTA_KDMSB_Targets_Dn                                           | -1.53 | 2.22 | 0 | 0 | 0 | Repressed       |
| 890 | GO_Translation_Factor_Activity_RNA_Binding                          | -1.53 | 2.19 | 0 | 0 | 0 | Repressed       |
| 891 | GO_Phosphatase_Regulator_Activity                                   | -1.53 | 2.05 | 0 | 0 | 0 | Repressed       |
| 892 | GO_RNA_Polymerase_II_Holoenzyme                                     | -1.53 | 2.03 | 0 | 0 | 0 | Repressed       |
| 893 | GO_Precatalytic_Spliceosome                                         | -1.53 | 1.96 | 0 | 0 | 0 | Repressed       |
| 894 | REACTOME_Platelet_Homeostasis                                       | -1.53 | 1.88 | 0 | 0 | 0 | Repressed       |
| 895 | GO_Regulation_of_Telomerase_Activity                                | -1.53 | 1.87 | 0 | 0 | 0 | Repressed       |
| 896 | REACTOME_ORC1_Removal_From_Chromatin                                | -1.53 | 1.84 | 0 | 0 | 0 | Repressed       |
| 897 | REACTOME_Recycling_of_Bile_Acids_and_Salts                          | -1.53 | 1.77 | 0 | 0 | 0 | Repressed       |
| 898 | REACTOME_SCF_Skp2_Mediated_Degradation_of_P27_P21                   | -1.53 | 1.76 | 0 | 0 | 0 | Repressed       |
| 899 | GO_Midbrain_Development                                             | -1.53 | 1.72 | 0 | 0 | 0 | Repressed       |
| 900 | MEINHOLD_Ovarian_Cancer_Low_Grade_Dn                                | -1.53 | 1.58 | 0 | 0 | 0 | Repressed       |
| 901 | GO_U2_Type_Catalytic_Step_2_Spliceosome                             | -1.53 | 1.54 | 0 | 0 | 0 | Repressed       |
| 902 | SARTIPY_Blunted_By_Insulin_Resistance_Up                            | -1.53 | 1.52 | 0 | 0 | 0 | Repressed       |
| 903 | SCHAEFFER_Prostate_Development_12HR_Dn                              | -1.53 | 1.5  | 0 | 0 | 0 | Repressed       |
| 904 | GO_Histone_Phosphorylation                                          | -1.53 | 1.48 | 0 | 0 | 0 | Repressed       |
| 905 | GO_Microtubule_End                                                  | -1.53 | 1.48 | 0 | 0 | 0 | Repressed       |
| 906 | GO_Pronucleus                                                       | -1.53 | 1.48 | 0 | 0 | 0 | Repressed       |
| 907 | JEON_Smad6_Targets_Dn                                               | -1.53 | 1.47 | 0 | 0 | 0 | Repressed       |
| 908 | SARTIPY_Normal_At_Insulin_Resistance_Up                             | -1.53 | 1.44 | 0 | 0 | 0 | Repressed       |
| 909 | GO_Anatomical_Structure_Arrangement                                 | -1.53 | 1.42 | 0 | 0 | 0 | Repressed       |
| 910 | GO_Spindle_Pole_Centrosome                                          | -1.53 | 1.4  | 0 | 0 | 0 | Repressed       |
| 911 | GO_Bile_Acid_and_Bile_Salt_Transport                                | -1.53 | 1.36 | 0 | 0 | 0 | Repressed       |
| 912 | GO_Clathrin_Coat_of_Coated_Pit                                      | -1.53 | 1.34 | 0 | 0 | 0 | Repressed       |
| 913 | GO_mRNA_Modification                                                | -1.53 | 1.31 | 0 | 0 | 0 | Repressed       |
| 914 | HAMAL_Apoptosis_Via_Trail_Up                                        | -1.52 | 4    | 0 | 0 | 0 | Repressed       |
| 915 | MARSON_Bound_By_E2F4_Unstimulated                                   | -1.52 | 4    | 0 | 0 | 0 | Repressed       |
| 916 | ROME_Insulin_Targets_In_Muscle_Up                                   | -1.52 | 4    | 0 | 0 | 0 | Repressed       |
| 917 | REACTOME_RNA_Polymerase_II_Transcription_Termination                | -1.52 | 2.53 | 0 | 0 | 0 | Repressed       |
| 918 | REACTOME_Negative_Epigenetic_Regulation_of_RRNA_Expression          | -1.52 | 2.49 | 0 | 0 | 0 | Repressed       |
| 919 | RUIZ_TNC_Targets_Dn                                                 | -1.52 | 2.48 | 0 | 0 | 0 | Repressed       |
| 920 | GRABARCZYK_BCL11B_Targets_Up                                        | -1.52 | 2.23 | 0 | 0 | 0 | Repressed       |
| 921 | GO_Mitochondrial_Translational_Termination                          | -1.52 | 2.2  | 0 | 0 | 0 | Repressed       |
| 922 | GO_RNA_Methylation                                                  | -1.52 | 2.18 | 0 | 0 | 0 | Repressed       |
| 923 | REACTOME_Sumoylation_of_Chromatin_Organization_Proteins             | -1.52 | 1.81 | 0 | 0 | 0 | Repressed       |
| 924 | GO_Zona_Pellucida_Receptor_Complex                                  | -1.52 | 1.79 | 0 | 0 | 0 | Repressed       |
| 925 | REACTOME_CA_Dependent_Events                                        | -1.52 | 1.69 | 0 | 0 | 0 | Repressed       |
| 926 | GO_Protein_Localization_to_Chromatin                                | -1.52 | 1.67 | 0 | 0 | 0 | Repressed       |
| 927 | GO_Condensed_Nuclear_Chromosome                                     | -1.52 | 1.65 | 0 | 0 | 0 | Repressed       |
| 928 | AMIT_Serum_Response_240_MCF10A                                      | -1.52 | 1.6  | 0 | 0 | 0 | Repressed       |
| 929 | GO_Regulation_of_Chemokine_C_X_C_Motif_Ligand_2_Production          | -1.52 | 1.6  | 0 | 0 | 0 | Repressed       |
| 930 | GO_PTW_PP1_Phosphatase_Complex                                      | -1.52 | 1.55 | 0 | 0 | 0 | Repressed       |
| 931 | GO_NCRNA_3_End_Processing                                           | -1.52 | 1.54 | 0 | 0 | 0 | Repressed       |
| 932 | GO_Positive_Regulation_of_Oxidative_Stress_Induced_Intrinsic_Apopt  | -1.52 | 1.53 | 0 | 0 | 0 | Repressed       |
| 933 | GO_Potassium_Ion_Binding                                            | -1.52 | 1.51 | 0 | 0 | 0 | Repressed       |
| 934 | GO_PWP2P_Containing_Subcomplex_of_90S_Pribosome                     | -1.52 | 1.47 | 0 | 0 | 0 | Repressed       |
| 935 | REACTOME_CHK1_CHK2_CDS1_Mediated_Inactivation_of_Cyclin_B:CDK1_CO   | -1.52 | 1.46 | 0 | 0 | 0 | Repressed       |
| 936 | REACTOME_RNA_Polymerase_III_Transcription_Initiation_From_Type_1_PR | -1.52 | 1.45 | 0 | 0 | 0 | Repressed       |
| 937 | GO_Cleavage_Involved_In_RRNA_Processing                             | -1.52 | 1.44 | 0 | 0 | 0 | Repressed       |
| 938 | GO_Aggregphagy                                                      | -1.52 | 1.4  | 0 | 0 | 0 | Repressed       |
| 939 | GO_Chaperone_Cofactor_Dependent_Protein_Refolding                   | -1.52 | 1.4  | 0 | 0 | 0 | Repressed       |
| 940 | BIOCARTA_Prion_Pathway                                              | -1.52 | 1.39 | 0 | 0 | 0 | Repressed       |
| 941 | GO_Actinin_Binding                                                  | -1.52 | 1.38 | 0 | 0 | 0 | Repressed       |
| 951 | GO_Cell_Cycle                                                       | -1.31 | 4    | 0 | 0 | 0 | not significant |
| 943 | REACTOME_HJR_Elav1_Binds_and_Stabilizes_mRNA                        | -1.52 | 1.37 | 0 | 0 | 0 | Repressed       |
| 944 | GO_Trachea_Development                                              | -1.52 | 1.32 | 0 | 0 | 0 | Repressed       |
| 945 | REACTOME_Prolonged_Erk_Activation_Events                            | -1.52 | 1.32 | 0 | 0 | 0 | Repressed       |
| 946 | WANG_Adiogenic_Genes_Repressed_By_Sirt1                             | -1.52 | 1.29 | 0 | 0 | 0 | Repressed       |
| 947 | REACTOME_RNA_Polymerase_III_Chain_Elongation                        | -1.52 | 1.27 | 0 | 0 | 0 | Repressed       |
| 948 | GO_Retrograde_Axonal_Transport                                      | -1.52 | 1.25 | 0 | 0 | 0 | Repressed       |
| 815 | DANG_Regulated_By_Myc_Up                                            | -1.36 | 1.24 | 0 | 0 | 0 | Repressed       |
| 950 | DIAZ_Chronic_Meiyogenous_Leukemia_Up                                | -1.51 | 4    | 0 | 0 | 0 | Repressed       |
| 752 | GO_Positive_Regulation_of_Cell_Cycle                                | -1.28 | 1.69 | 0 | 0 | 0 | not significant |
| 952 | GO_Mitochondrial_Protein_Complex                                    | -1.51 | 4    | 0 | 0 | 0 | Repressed       |
| 953 | GO_Organelle_Ribosome                                               | -1.51 | 4    | 0 | 0 | 0 | Repressed       |
| 954 | GO_Proteasomal_Protein_Catabolic_Process                            | -1.51 | 4    | 0 | 0 | 0 | Repressed       |
| 955 | ZHANG_TLX_Targets_60HR_Dn                                           | -1.51 | 4    | 0 | 0 | 0 | Repressed       |
| 956 | GROSS_Hypoxia_Via_Elk3_and_Hif1a_Dn                                 | -1.51 | 2.5  | 0 | 0 | 0 | Repressed       |
| 957 | GO_ATP_Dependent_Chromatin_Remodeling                               | -1.51 | 2.23 | 0 | 0 | 0 | Repressed       |
| 958 | GO_Regulation_of_Circadian_Rhythm                                   | -1.51 | 2.22 | 0 | 0 | 0 | Repressed       |
| 959 | BROWNE_HCMV_Infection_30Min_Dn                                      | -1.51 | 2.16 | 0 | 0 | 0 | Repressed       |
| 960 | PID_P73Pathway                                                      | -1.51 | 2.03 | 0 | 0 | 0 | Repressed       |
| 961 | GO_Motor_Activity                                                   | -1.51 | 2.02 | 0 | 0 | 0 | Repressed       |
| 962 | BURTON_Adiogenesis_2                                                | -1.51 | 1.92 | 0 | 0 | 0 | Repressed       |
| 963 | PID_CDC42_Pathway                                                   | -1.51 | 1.92 | 0 | 0 | 0 | Repressed       |
| 964 | GO_Negative_Regulation_of_Metaphase_Anaphase_Transition_of_Cell     | -1.51 | 1.85 | 0 | 0 | 0 | Repressed       |
| 965 | GO_Positive_Regulation_of_Microtubule_Binding                       | -1.51 | 1.74 | 0 | 0 | 0 | Repressed       |
| 966 | GO_Endopeptidase_Activator_Activity                                 | -1.51 | 1.73 | 0 | 0 | 0 | Repressed       |
| 967 | GO_Regulation_of_Telomere_Maintenance_Via_Telomere_Lengthening      | -1.51 | 1.73 | 0 | 0 | 0 | Repressed       |
| 968 | ISHIDA_E2F_Targets                                                  | -1.51 | 1.67 | 0 | 0 | 0 | Repressed       |
| 969 | GO_RRNA_Binding                                                     | -1.51 | 1.65 | 0 | 0 | 0 | Repressed       |

|      |                                                                     |       |      |   |   |   |                 |
|------|---------------------------------------------------------------------|-------|------|---|---|---|-----------------|
| 970  | REACTOME_ACTIVATION_OF_NMDA_RECEPTORS_AND_POSTSYNAPTIC_EVENTS       | -1.51 | 1.63 | 0 | 0 | 0 | Repressed       |
| 971  | MCCLUNG_COCAINE_REWARD_5D                                           | -1.51 | 1.6  | 0 | 0 | 0 | Repressed       |
| 972  | GO_SNRNA_BINDING                                                    | -1.51 | 1.59 | 0 | 0 | 0 | Repressed       |
| 973  | GO_MEIOTIC_SPINDLE                                                  | -1.51 | 1.57 | 0 | 0 | 0 | Repressed       |
| 974  | REACTOME_RNA_POLYMERASE_III_TRANSCRIPTION_INITIATION_FROM_TYPE_3_PR | -1.51 | 1.57 | 0 | 0 | 0 | Repressed       |
| 975  | REACTOME_FORMATION_OF_HIV_ELONGATION_COMPLEX_IN_THE_ABSENCE_OF_I    | -1.51 | 1.55 | 0 | 0 | 0 | Repressed       |
| 976  | GO_ATP_DEPENDENT_5_3_DNA_HELICASE_ACTIVITY                          | -1.51 | 1.52 | 0 | 0 | 0 | Repressed       |
| 977  | GO_IMPORTIN_ALPHA_FAMILY_PROTEIN_BINDING                            | -1.51 | 1.49 | 0 | 0 | 0 | Repressed       |
| 978  | GO_ISOPRENOLID_BINDING                                              | -1.51 | 1.48 | 0 | 0 | 0 | Repressed       |
| 979  | GO_DE_NOVO_IMP_BIOSYNTHETIC_PROCESS                                 | -1.51 | 1.47 | 0 | 0 | 0 | Repressed       |
| 980  | GO_MODULATION_BY_SYMBIONT_OF_HOST_CELLULAR_PROCESS                  | -1.51 | 1.47 | 0 | 0 | 0 | Repressed       |
| 981  | GO_REGULATION_OF_TRANSCRIPTION_BY_RNA_POLYMERASE_III                | -1.51 | 1.42 | 0 | 0 | 0 | Repressed       |
| 982  | REACTOME_PROCESSING_OF_INTRONLESS_PRE_MRNAS                         | -1.51 | 1.41 | 0 | 0 | 0 | Repressed       |
| 983  | KEGG_CYSSTEINE_AND_METHIONINE_METABOLISM                            | -1.48 | 1.39 | 1 | 0 | 0 | Repressed       |
| 984  | GO_CRD_MEDIATED_MRNA_STABILITY_COMPLEX                              | -1.51 | 1.38 | 0 | 0 | 0 | Repressed       |
| 985  | WIEMANN_TELOMERE_SHORTENING_AND_CHRONIC_LIVER_DAMAGE_UP             | -1.51 | 1.33 | 0 | 0 | 0 | Repressed       |
| 986  | GO_REGULATION_OF_MICROTUBULE_BINDING                                | -1.51 | 1.32 | 0 | 0 | 0 | Repressed       |
| 987  | L1_WILMS_TUMOR_ANAPLASTIC_UP                                        | -1.51 | 1.31 | 0 | 0 | 0 | Repressed       |
| 988  | BIOCARTA_CARM1_PATHWAY                                              | -1.51 | 1.3  | 0 | 0 | 0 | Repressed       |
| 989  | HOUSTIS_ROS                                                         | -1.51 | 1.3  | 0 | 0 | 0 | Repressed       |
| 990  | CAFFAREL_RESPONSE_TO_THC_8HR_3_DN                                   | -1.51 | 1.29 | 0 | 0 | 0 | Repressed       |
| 991  | GO_KERATINOCYTE_MIGRATION                                           | -1.51 | 1.29 | 0 | 0 | 0 | Repressed       |
| 992  | GO_VIRAL_TRANSLATION                                                | -1.51 | 1.25 | 0 | 0 | 0 | Repressed       |
| 949  | BENPORATH_MYC_MAX_TARGETS                                           | -1.31 | 4    | 0 | 0 | 0 | Repressed       |
| 994  | GO_TRNA_CYTOSINE_METHYLTRANSFERASE_ACTIVITY                         | -1.41 | 1.06 | 1 | 0 | 0 | Repressed       |
| 995  | GO_ANTIGEN_PROCESSING_AND_PRESENTATION_OF_PEPTIDE_ANTIGEN           | -1.50 | 4    | 0 | 0 | 0 | Repressed       |
| 942  | GO_POSITIVE_REGULATION_OF_CELL_CYCLE_PROCESS                        | -1.22 | 1.38 | 0 | 0 | 0 | not significant |
| 997  | GO_CELLULAR_RESPONSE_TO_OXYGEN_LEVELS                               | -1.50 | 4    | 0 | 0 | 0 | Repressed       |
| 998  | GO_MICROTUBULE_BINDING                                              | -1.50 | 4    | 0 | 0 | 0 | Repressed       |
| 999  | GO_REGULATION_OF_NUCLEOBASE_CONTAINING_COMPOUND_METABOLIC_PROCI     | -1.50 | 4    | 0 | 0 | 0 | Repressed       |
| 1000 | GO_TUBULIN_BINDING                                                  | -1.50 | 4    | 0 | 0 | 0 | Repressed       |
| 1001 | REACTOME_INTRA_GOLGI_AND_RETROGRADE_GOLGI_TO_ER_TRAFFIC             | -1.50 | 2.36 | 0 | 0 | 0 | Repressed       |
| 1002 | GO_ORGANELLAR_LARGE_RIBOSOMAL_SUBUNIT                               | -1.50 | 1.94 | 0 | 0 | 0 | Repressed       |
| 1003 | SANA_RESPONSE_TO_IFNG_DN                                            | -1.50 | 1.9  | 0 | 0 | 0 | Repressed       |
| 1004 | GO_HIPPOCAMPUS_DEVELOPMENT                                          | -1.50 | 1.77 | 0 | 0 | 0 | Repressed       |
| 1005 | GO_U2_TYPE_SPLICEOSOMAL_COMPLEX                                     | -1.50 | 1.7  | 0 | 0 | 0 | Repressed       |
| 1006 | GO_POSITIVE_REGULATION_OF_DEPHOSPHORYLATION                         | -1.50 | 1.69 | 0 | 0 | 0 | Repressed       |
| 1007 | GO_REGULATION_OF_OOGENESIS                                          | -1.50 | 1.65 | 0 | 0 | 0 | Repressed       |
| 1008 | GO_CAJAL_BODY                                                       | -1.50 | 1.63 | 0 | 0 | 0 | Repressed       |
| 1009 | GO_NUCLEAR_UBIQUITIN_LIGASE_COMPLEX                                 | -1.50 | 1.62 | 0 | 0 | 0 | Repressed       |
| 1010 | GO_SCARNA_LOCALIZATION_TO_CAJAL_BODY                                | -1.50 | 1.61 | 0 | 0 | 0 | Repressed       |
| 1011 | GO_VESICLE_CYTOSKELETAL_TRAFFICKING                                 | -1.50 | 1.61 | 0 | 0 | 0 | Repressed       |
| 1012 | REACTOME_PRE_NOTCH_PROCESSING_IN_THE_ENDOPLASMIC_RETICULUM          | -1.50 | 1.59 | 0 | 0 | 0 | Repressed       |
| 1013 | GO_MITOTIC_METAPHASE_PLATE_CONGRESSION                              | -1.50 | 1.57 | 0 | 0 | 0 | Repressed       |
| 1014 | CHIN_BREAST_CANCER_COPY_NUMBER_UP                                   | -1.50 | 1.53 | 0 | 0 | 0 | Repressed       |
| 1015 | REACTOME_TELOMERE_EXTENSION_BY_TELOMERASE                           | -1.50 | 1.52 | 0 | 0 | 0 | Repressed       |
| 1016 | GO_CELL_CELL_RECOGNITION                                            | -1.50 | 1.51 | 0 | 0 | 0 | Repressed       |
| 1017 | BIOCARTA_G2_PATHWAY                                                 | -1.50 | 1.47 | 0 | 0 | 0 | Repressed       |
| 1018 | GO_REGULATION_OF_PHOSPHATIDYLINOSITOL_DEPHOSPHORYLATION             | -1.50 | 1.44 | 0 | 0 | 0 | Repressed       |
| 1019 | REACTOME_INTERACTIONS_OF_VPR_WITH_HOST_CELLULAR_PROTEINS            | -1.50 | 1.44 | 0 | 0 | 0 | Repressed       |
| 1020 | BIOCARTA_EIF_PATHWAY                                                | -1.50 | 1.42 | 0 | 0 | 0 | Repressed       |
| 1021 | GO_MODIFICATION_BY_SYMBIONT_OF_HOST_MORPHOLOGY_OR_PHYSIOLOGY        | -1.50 | 1.42 | 0 | 0 | 0 | Repressed       |
| 1022 | GO_PEBOW_COMPLEX                                                    | -1.50 | 1.37 | 0 | 0 | 0 | Repressed       |
| 1023 | GO_NITRIC_OXIDE_SYNTHASE_REGULATOR_ACTIVITY                         | -1.50 | 1.34 | 0 | 0 | 0 | Repressed       |
| 1024 | GO_NEURAL_CRESCENT_FORMATION                                        | -1.50 | 1.3  | 0 | 0 | 0 | Repressed       |
| 1025 | GO_C2H2_ZINC_FINGER_DOMAIN_BINDING                                  | -1.50 | 1.29 | 0 | 0 | 0 | Repressed       |
| 1026 | GO_METHYLOSOME                                                      | -1.50 | 1.29 | 0 | 0 | 0 | Repressed       |
| 1027 | NAM_FXYD5_TARGETS_DN                                                | -1.50 | 1.26 | 0 | 0 | 0 | Repressed       |
| 1028 | MA_PITUITARY_FETAL_VS_ADULT_DN                                      | -1.50 | 1.25 | 0 | 0 | 0 | Repressed       |
| 1029 | GO_TRNA_CYTOSINE_5_METHYLTRANSFERASE_ACTIVITY                       | -1.39 | 1.06 | 1 | 0 | 0 | Repressed       |
| 1030 | KEGG_VALINE_LEUCINE_AND_ISOLEUCINE_BIOSYNTHESIS                     | -1.40 | 1.02 | 1 | 0 | 0 | Repressed       |
| 1031 | GO_MICROTUBULE_BASED_PROCESS                                        | -1.49 | 4    | 0 | 0 | 0 | not significant |
| 1032 | GO_POSITIVE_REGULATION_OF_PROTEIN_MODIFICATION_BY_SMALL_PROTEIN_CC  | -1.49 | 4    | 0 | 0 | 0 | not significant |
| 1033 | GO_REGULATION_OF_MICROTUBULE_BASED_PROCESS                          | -1.49 | 4    | 0 | 0 | 0 | not significant |
| 1034 | GO_REGULATION_OF_PROTEASOMAL_PROTEIN_CATABOLIC_PROCESS              | -1.49 | 4    | 0 | 0 | 0 | not significant |
| 1035 | REACTOME_CELLULAR_RESPONSES_TO_EXTERNAL_STIMULI                     | -1.49 | 4    | 0 | 0 | 0 | not significant |
| 1036 | SCHLOSSER_SERUM_RESPONSE_AUGMENTED_BY_MYC                           | -1.49 | 2.48 | 0 | 0 | 0 | not significant |
| 1037 | GO_MRNA_3_END_PROCESSING                                            | -1.49 | 2.18 | 0 | 0 | 0 | not significant |
| 1038 | REACTOME_REGULATION_OF_PLK1_ACTIVITY_AT_G2_M_TRANSITION             | -1.49 | 1.88 | 0 | 0 | 0 | not significant |
| 1039 | REACTOME_PROTEIN_FOLDING                                            | -1.49 | 1.82 | 0 | 0 | 0 | not significant |
| 1040 | KAMMINGA_EZH2_TARGETS                                               | -1.49 | 1.74 | 0 | 0 | 0 | not significant |
| 1041 | REACTOME_OPIOID_SIGNALLING                                          | -1.49 | 1.69 | 0 | 0 | 0 | not significant |
| 1042 | GO_PROTEIN_SERINE_THREONINE_TYROSINE_KINASE_ACTIVITY                | -1.49 | 1.66 | 0 | 0 | 0 | not significant |
| 1043 | GO_RESPONSE_TO_ARSENIC_CONTAINING_SUBSTANCE                         | -1.49 | 1.56 | 0 | 0 | 0 | not significant |
| 1044 | BIOCARTA_SARS_PATHWAY                                               | -1.49 | 1.54 | 0 | 0 | 0 | not significant |
| 1045 | GO_TRANSCRIPTION_INITIATION_FROM_RNA_POLYMERASE_I_PROMOTER          | -1.49 | 1.51 | 0 | 0 | 0 | not significant |
| 1046 | GO_PROTEIN_KINASE_A_BINDING                                         | -1.49 | 1.5  | 0 | 0 | 0 | not significant |
| 1047 | GO_OXIDATIVE_RNA_DEMETHYLATION                                      | -1.49 | 1.44 | 0 | 0 | 0 | not significant |
| 1048 | GO_EUKARYOTIC_TRANSLATION_INITIATION_FACTOR_2B_COMPLEX              | -1.49 | 1.42 | 0 | 0 | 0 | not significant |
| 1049 | GO_REGULATION_OF_TRANSLATION_AT_SYNAPSE_MODULATING_SYNAPTIC_TRAN    | -1.49 | 1.4  | 0 | 0 | 0 | not significant |
| 1050 | BURTON_ADIPOGENESIS_12                                              | -1.49 | 1.38 | 0 | 0 | 0 | not significant |
| 1051 | GO_VENTRICULAR_CARDIAC_MUSCLE_TISSUE_DEVELOPMENT                    | -1.49 | 1.35 | 0 | 0 | 0 | not significant |
| 1052 | GO_OUTER_MITOCHONDRIAL_MEMBRANE_ORGANIZATION                        | -1.49 | 1.33 | 0 | 0 | 0 | not significant |
| 1053 | REACTOME_BETA_CATENIN_PHOSPHORYLATION_CASCADE                       | -1.49 | 1.33 | 0 | 0 | 0 | not significant |
| 1054 | TURASHVILI_BREAST_DUCTAL_CARCINOMA_VS_DUCTAL_NORMAL_UP              | -1.49 | 1.33 | 0 | 0 | 0 | not significant |
| 1055 | REACTOME_CRISTAE_FORMATION                                          | -1.49 | 1.32 | 0 | 0 | 0 | not significant |
| 1056 | GO_REGULATION_OF_SISTER_CHROMATID_COHESION                          | -1.49 | 1.3  | 0 | 0 | 0 | not significant |
| 1057 | GO_FEMALE_MEIOSIS_I                                                 | -1.49 | 1.28 | 0 | 0 | 0 | not significant |
| 1058 | YH_RESPONSE_TO_ARSENITE_C4                                          | -1.49 | 1.27 | 0 | 0 | 0 | not significant |
| 1059 | GO_HISTONE_KINASE_ACTIVITY                                          | -1.49 | 1.25 | 0 | 0 | 0 | not significant |
| 1060 | GO_OXIDATIVE_RNA_DEMETHYLASE_ACTIVITY                               | -1.49 | 1.25 | 0 | 0 | 0 | not significant |
| 1061 | GO_NEGATIVE_REGULATION_OF_RELEASE_OF_CYTOCHROME_C_FROM_MITOCHC      | -1.49 | 1.24 | 0 | 0 | 0 | not significant |
| 1062 | GO_POSITIVE_REGULATION_OF_OXIDATIVE_PHOSPHORYLATION                 | -1.49 | 1.24 | 0 | 0 | 0 | not significant |
| 1063 | GO TRABECULA FORMATION                                              | -1.49 | 1.22 | 0 | 0 | 0 | not significant |
| 1064 | NAGY_STAGA_COMPONENTS_HUMAN                                         | -1.49 | 1.22 | 0 | 0 | 0 | not significant |
| 1065 | REACTOME_BINDING_AND_UPTAKE_OF_LIGANDS_BY_SCAVENGER_RECEPTORS       | -1.49 | 1.22 | 0 | 0 | 0 | not significant |
| 1066 | REACTOME_FRS_MEDIATED_FGFR1_SIGNALING                               | -1.49 | 1.21 | 0 | 0 | 0 | not significant |
| 1067 | REACTOME_NUCLEOBASE_BIOSYNTHESIS                                    | -1.49 | 1.17 | 0 | 0 | 0 | not significant |
| 1068 | GO_MRNA_CLEAVAGE_FACTOR_COMPLEX                                     | -1.49 | 1.15 | 0 | 0 | 0 | not significant |
| 1069 | GENTILE_UV_HIGH_DOSE_DN                                             | -1.48 | 4    | 0 | 0 | 0 | not significant |
| 1070 | GO_CELLULAR_PROTEIN_COMPLEX_DISASSEMBLY                             | -1.48 | 4    | 0 | 0 | 0 | not significant |
| 1071 | GO_CELLULAR_PROTEIN_CONTAINING_COMPLEX_ASSEMBLY                     | -1.48 | 4    | 0 | 0 | 0 | not significant |
| 1072 | GO_REGULATION_OF_MITOTIC_CELL_CYCLE                                 | -1.48 | 4    | 0 | 0 | 0 | not significant |
| 1073 | KEGG_CELL_CYCLE                                                     | -1.48 | 2.47 | 0 | 0 | 0 | not significant |
| 1074 | BROWNE_HCMV_INFECTION_14HR_UP                                       | -1.48 | 2.42 | 0 | 0 | 0 | not significant |
| 1075 | GO_CYTOKINESIS                                                      | -1.48 | 2.12 | 0 | 0 | 0 | not significant |
| 1076 | SASAKI_ADULT_T_CELL_LEUKEMIA                                        | -1.48 | 2.12 | 0 | 0 | 0 | not significant |
| 1077 | DACOSTA_UV_RESPONSE_VIA_ERCC3_XPCS_DN                               | -1.48 | 2.04 | 0 | 0 | 0 | not significant |
| 1078 | GO_REGULATION_OF_PROTEASOMAL_UBIQUITIN_DEPENDENT_PROTEIN_CATABOL    | -1.48 | 1.97 | 0 | 0 | 0 | not significant |

|      |                                                                     |       |      |   |   |   |                 |
|------|---------------------------------------------------------------------|-------|------|---|---|---|-----------------|
| 1079 | REACTOME_POSITIVE_EPIGENETIC_REGULATION_OF_RRNA_EXPRESSION          | -1.48 | 1.89 | 0 | 0 | 0 | not significant |
| 1080 | REACTOME_G1_S_DNA_DAMAGE_CHECKPOINTS                                | -1.48 | 1.86 | 0 | 0 | 0 | not significant |
| 1081 | YAO_TEMPORAL_RESPONSE_TO_PROGESTERONE_CLUSTER_10                    | -1.48 | 1.81 | 0 | 0 | 0 | not significant |
| 1082 | GO_PERICHROMATIN_FIBRILS                                            | -1.48 | 1.68 | 0 | 0 | 0 | not significant |
| 1083 | GO_MATURE_RIBOSOME_ASSEMBLY                                         | -1.48 | 1.64 | 0 | 0 | 0 | not significant |
| 1084 | GO_TRANSCRIPTION_BY_RNA_POLYMERASE_III                              | -1.48 | 1.63 | 0 | 0 | 0 | not significant |
| 1085 | REACTOME_MITOCHONDRIAL_TRNA_AMINOACYLATION                          | -1.48 | 1.49 | 0 | 0 | 0 | not significant |
| 1086 | REACTOME_ION_HOMEOSTASIS                                            | -1.48 | 1.48 | 0 | 0 | 0 | not significant |
| 1087 | GO_REGULATION_OF_TRANSLATIONAL_FIDELITY                             | -1.48 | 1.46 | 0 | 0 | 0 | not significant |
| 1088 | GO_REGULATORY_RNA_BINDING                                           | -1.48 | 1.43 | 0 | 0 | 0 | not significant |
| 1089 | GO_PURINE_NUCLEOSIDE_MONOPHOSPHATE_BIOSYNTHETIC_PROCESS             | -1.48 | 1.41 | 0 | 0 | 0 | not significant |
| 1090 | GO_ESTABLISHMENT_OF_PROTEIN_LOCALIZATION_TO_CHROMOSOME              | -1.48 | 1.39 | 0 | 0 | 0 | not significant |
| 1091 | GO_MLL1_2_COMPLEX                                                   | -1.48 | 1.38 | 0 | 0 | 0 | not significant |
| 1092 | GO_MITOTIC_SPINDLE_POLE                                             | -1.48 | 1.37 | 0 | 0 | 0 | not significant |
| 1093 | GO_TELOMERASE_RNA_BINDING                                           | -1.48 | 1.36 | 0 | 0 | 0 | not significant |
| 1094 | MIKKELSEN_PLURIPOTENT_STATE_UP                                      | -1.48 | 1.36 | 0 | 0 | 0 | not significant |
| 1095 | GO_ESTABLISHMENT_OF_PROTEIN_LOCALIZATION_TO_TELOMERE                | -1.48 | 1.33 | 0 | 0 | 0 | not significant |
| 1096 | GO_PORIN_ACTIVITY                                                   | -1.48 | 1.32 | 0 | 0 | 0 | not significant |
| 1097 | GO_PROTEIN_DESUMOYLATION                                            | -1.48 | 1.3  | 0 | 0 | 0 | not significant |
| 1098 | REACTOME_RHO_GTPASES_ACTIVATE_PAKS                                  | -1.48 | 1.28 | 0 | 0 | 0 | not significant |
| 1099 | GO_TRANSCRIPTION_ELONGATION_FROM_RNA_POLYMERASE_I_PROMOTER          | -1.48 | 1.27 | 0 | 0 | 0 | not significant |
| 1100 | GO_NEGATIVE_REGULATION_OF_SIGNAL_TRANSDUCTION_BY_P53_CLASS_MEDIAT   | -1.48 | 1.26 | 0 | 0 | 0 | not significant |
| 1101 | GO_PROTEIN_LOCALIZATION_TO_CELL_CORTEX                              | -1.48 | 1.26 | 0 | 0 | 0 | not significant |
| 1102 | GO_U6_SNRNP                                                         | -1.48 | 1.26 | 0 | 0 | 0 | not significant |
| 1103 | LOPEZ_MESOTHELIOMA_SURVIVAL_OVERALL_DN                              | -1.48 | 1.24 | 0 | 0 | 0 | not significant |
| 1104 | GO_CELLULAR_RESPONSE_TO ESTRADIOL_STIMULUS                          | -1.48 | 1.23 | 0 | 0 | 0 | not significant |
| 1105 | GO_SNRNA_TRANSCRIPTION_BY_RNA_POLYMERASE_III                        | -1.48 | 1.2  | 0 | 0 | 0 | not significant |
| 1106 | CAIRO_HEPATOBLASTOMA_POOR_SURVIVAL                                  | -1.48 | 1.16 | 0 | 0 | 0 | not significant |
| 1107 | GO_UBIQUITIN_PROTEIN_TRANSFERASE_ACTIVATOR_ACTIVITY                 | -1.48 | 1.16 | 0 | 0 | 0 | not significant |
| 1108 | GO_CRISTAE_FORMATION                                                | -1.48 | 1.14 | 0 | 0 | 0 | not significant |
| 1109 | REACTOME_SUMOYLATION                                                | -1.47 | 2.35 | 0 | 0 | 0 | not significant |
| 1110 | GO_SINGLE_STRANDED_RNA_BINDING                                      | -1.47 | 2.21 | 0 | 0 | 0 | not significant |
| 1111 | GO_RETROGRADE_VESICLE_MEDIATED_TRANSPORT_GOLGI_TO_ENDOPLASMIC_F     | -1.47 | 2.19 | 0 | 0 | 0 | not significant |
| 1112 | REACTOME_PROGRAMMED_CELL_DEATH                                      | -1.47 | 2.11 | 0 | 0 | 0 | not significant |
| 1113 | NIKOLSKY_BREAST_CANCER_17Q11_Q21_AMPLICON                           | -1.47 | 1.73 | 0 | 0 | 0 | not significant |
| 1114 | GO_SM_LIKE_PROTEIN_FAMILY_COMPLEX                                   | -1.47 | 1.6  | 0 | 0 | 0 | not significant |
| 1115 | GO_REGULATION_OF_UBIQUITIN_PROTEIN_TRANSFERASE_ACTIVITY             | -1.47 | 1.53 | 0 | 0 | 0 | not significant |
| 1116 | GO_PROTEIN_TRANSMEMBRANE_IMPORT_INTO_INTRACELLULAR_ORGANELLE        | -1.47 | 1.51 | 0 | 0 | 0 | not significant |
| 1117 | CHR15Q22                                                            | -1.47 | 1.49 | 0 | 0 | 0 | not significant |
| 1118 | LEE_AGING_NEOCORTEX_DN                                              | -1.47 | 1.44 | 0 | 0 | 0 | not significant |
| 1119 | REACTOME_PROCESSING_OF_CAPPED_INTRONLESS_PRE_MRNA                   | -1.47 | 1.44 | 0 | 0 | 0 | not significant |
| 1120 | GO_RESPONSE_TO_ETHER                                                | -1.47 | 1.42 | 0 | 0 | 0 | not significant |
| 1121 | FARDIN_HYPOXIA_11                                                   | -1.47 | 1.41 | 0 | 0 | 0 | not significant |
| 1122 | GO_POSITIVE_REGULATION_OF_CELL_MATURATION                           | -1.47 | 1.38 | 0 | 0 | 0 | not significant |
| 1123 | GO_ATP_METABOLIC_PROCESS                                            | -1.47 | 1.37 | 0 | 0 | 0 | not significant |
| 1124 | GO_OXIDATIVE_DEMETHYLATION                                          | -1.47 | 1.36 | 0 | 0 | 0 | not significant |
| 1125 | REACTOME_SCAVENGING_BY_CLASS_F_RECEPTORS                            | -1.47 | 1.35 | 0 | 0 | 0 | not significant |
| 1126 | CHR3Q22                                                             | -1.47 | 1.34 | 0 | 0 | 0 | not significant |
| 1127 | GO_ESTABLISHMENT_OF_SPINDLE_ORIENTATION                             | -1.47 | 1.34 | 0 | 0 | 0 | not significant |
| 1128 | NAGY_PCAF_COMPONENTS_HUMAN                                          | -1.47 | 1.33 | 0 | 0 | 0 | not significant |
| 1129 | GO_PROTEIN_DNA_COMPLEX_DISASSEMBLY                                  | -1.47 | 1.32 | 0 | 0 | 0 | not significant |
| 1130 | GO_WD40_REPEAT_DOMAIN_BINDING                                       | -1.47 | 1.32 | 0 | 0 | 0 | not significant |
| 1131 | GO_EPITHELIAL_CELL_DIFFERENTIATION_INVOLVED_IN_PROSTATE_GLAND_DEVEL | -1.47 | 1.3  | 0 | 0 | 0 | not significant |
| 1132 | GO_HISTONE_SERINE_KINASE_ACTIVITY                                   | -1.47 | 1.29 | 0 | 0 | 0 | not significant |
| 1133 | GO_POSITIVE_REGULATION_OF_TRANSCRIPTION_ELONGATION_FROM_RNA_POLY    | -1.47 | 1.29 | 0 | 0 | 0 | not significant |
| 1134 | REACTOME_SYNTHESIS_OF_BILE_ACIDS_AND_BILE_SALTS_VIA_7ALPHA_HYDROXY  | -1.47 | 1.28 | 0 | 0 | 0 | not significant |
| 1135 | GO_RNA_POLYMERASE_II_PREINITIATION_COMPLEX_ASSEMBLY                 | -1.47 | 1.27 | 0 | 0 | 0 | not significant |
| 1136 | GO_TRNA_5_LEADER_REMOVAL                                            | -1.47 | 1.27 | 0 | 0 | 0 | not significant |
| 1137 | GO_HISTONE_ARGININE_N_METHYLTRANSFERASE_ACTIVITY                    | -1.47 | 1.26 | 0 | 0 | 0 | not significant |
| 1138 | GO_MHC_CLASS_II_PROTEIN_COMPLEX_BINDING                             | -1.47 | 1.26 | 0 | 0 | 0 | not significant |
| 1139 | REACTOME_LOSS_OF_MECP2_BINDING_ABILITY_TO_THE_NCOR_SMRT_COMPLEX     | -1.47 | 1.23 | 0 | 0 | 0 | not significant |
| 1140 | REACTOME_RETROGRADE_NEUROTROPHIN_SIGNALING                          | -1.47 | 1.23 | 0 | 0 | 0 | not significant |
| 1141 | GO_EYELID_DEVELOPMENT_IN_CAMERA_TYPE_EYE                            | -1.47 | 1.21 | 0 | 0 | 0 | not significant |
| 1142 | GO_Glutamate_Catabolic_Process                                      | -1.47 | 1.2  | 0 | 0 | 0 | not significant |
| 1143 | REACTOME_APOPTOSIS_INDUCED_DNA_FRAGMENTATION                        | -1.47 | 1.2  | 0 | 0 | 0 | not significant |
| 1144 | GO_OLFACTORY_LOBE_DEVELOPMENT                                       | -1.47 | 1.18 | 0 | 0 | 0 | not significant |
| 1145 | GO_PROTEASOME_ASSEMBLY                                              | -1.47 | 1.17 | 0 | 0 | 0 | not significant |
| 1146 | GO_REGULATION_OF_RNA_SPLICING                                       | -1.46 | 2.42 | 0 | 0 | 0 | not significant |
| 1147 | GO_NUCLEAR_MATRIX                                                   | -1.46 | 1.86 | 0 | 0 | 0 | not significant |
| 1148 | GO_MITOCHONDRIAL_TRANSLATION                                        | -1.46 | 1.84 | 0 | 0 | 0 | not significant |
| 1149 | GRAHAM_NORMAL_QUIESCENT_VS_NORMAL_DIVIDING_DN                       | -1.46 | 1.78 | 0 | 0 | 0 | not significant |
| 1150 | GO_CHAPERONE_MEDIATED_PROTEIN_FOLDING                               | -1.46 | 1.69 | 0 | 0 | 0 | not significant |
| 1151 | KEGG_RENAL_CELL_CARCINOMA                                           | -1.46 | 1.62 | 0 | 0 | 0 | not significant |
| 1152 | REACTOME_COPI_INDEPENDENT_GOLGI_TO_ER_RETROGRADE_TRAFFIC            | -1.46 | 1.53 | 0 | 0 | 0 | not significant |
| 1153 | REACTOME_SYNTHESIS_OF_BILE_ACIDS_AND_BILE_SALTS_VIA_27_HYDROXYCHOL  | -1.46 | 1.5  | 0 | 0 | 0 | not significant |
| 1154 | REACTOME_RNA_POLYMERASE_III_TRANSCRIPTION_TERMINATION               | -1.46 | 1.44 | 0 | 0 | 0 | not significant |
| 1155 | GO_ENDONUCLEASE_COMPLEX                                             | -1.46 | 1.41 | 0 | 0 | 0 | not significant |
| 1156 | RAHMAN_TP53_TARGETS_PHOSPHORYLATED                                  | -1.46 | 1.34 | 0 | 0 | 0 | not significant |
| 1157 | GO_NEGATIVE_REGULATION_OF_MYELOID_LEUKOCYTE_DIFFERENTIATION         | -1.46 | 1.33 | 0 | 0 | 0 | not significant |
| 1158 | REACTOME_SIGNALING_BY_WNT_IN_CANCER                                 | -1.46 | 1.33 | 0 | 0 | 0 | not significant |
| 1159 | WEST_ADRENOCORITICAL_CARCINOMA_VS_ADENOMA_UP                        | -1.46 | 1.33 | 0 | 0 | 0 | not significant |
| 1160 | GO_SMN_SM_PROTEIN_COMPLEX                                           | -1.46 | 1.32 | 0 | 0 | 0 | not significant |
| 1161 | GO_CELL_DIFFERENTIATION_INVOLVED_IN_KIDNEY_DEVELOPMENT              | -1.46 | 1.3  | 0 | 0 | 0 | not significant |
| 1162 | GO_SNORNA_3_END_PROCESSING                                          | -1.46 | 1.3  | 0 | 0 | 0 | not significant |
| 1163 | KEGG_THYROID_CANCER                                                 | -1.46 | 1.3  | 0 | 0 | 0 | not significant |
| 1164 | REACTOME_MICRORNA_MIRNA_BIOGENESIS                                  | -1.46 | 1.28 | 0 | 0 | 0 | not significant |
| 1165 | GO_REGULATION_OF_DNA_TEMPLATED_TRANSCRIPTION_INITIATION             | -1.46 | 1.27 | 0 | 0 | 0 | not significant |
| 1166 | REACTOME_SIGNALING_BY_RETINOIC_ACID                                 | -1.46 | 1.27 | 0 | 0 | 0 | not significant |
| 1167 | GO_MODULATION_BY_HOST_OF_VIRAL_PROCESS                              | -1.46 | 1.26 | 0 | 0 | 0 | not significant |
| 1168 | GO_POSITIVE_REGULATION_OF_CAMP_MEDIATED_SIGNALING                   | -1.46 | 1.26 | 0 | 0 | 0 | not significant |
| 1169 | GO_INTRAMOLECULAR_TRANSFERASE_ACTIVITY                              | -1.46 | 1.25 | 0 | 0 | 0 | not significant |
| 1170 | GO_POSITIVE_REGULATION_OF_NITRIC_OXIDE_SYNTHASE_BIOSYNTHETIC_PROCE  | -1.46 | 1.25 | 0 | 0 | 0 | not significant |
| 1171 | BIOCARTA_NDKDYNAMIN_PATHWAY                                         | -1.46 | 1.24 | 0 | 0 | 0 | not significant |
| 1172 | GO_RRNA_PSEUDOURIDINE_SYNTHESIS                                     | -1.46 | 1.24 | 0 | 0 | 0 | not significant |
| 1173 | GO_ADENYLATE_KINASE_ACTIVITY                                        | -1.46 | 1.23 | 0 | 0 | 0 | not significant |
| 1174 | GO_RAL_GTPASE_BINDING                                               | -1.46 | 1.22 | 0 | 0 | 0 | not significant |
| 1175 | GO_POSITIVE_REGULATION_OF_ASTROCYTE_DIFFERENTIATION                 | -1.46 | 1.18 | 0 | 0 | 0 | not significant |
| 1176 | GO_DNA_TOPOLOGICAL_CHANGE                                           | -1.46 | 1.16 | 0 | 0 | 0 | not significant |
| 1177 | REACTOME_TIE2_SIGNALING                                             | -1.46 | 1.16 | 0 | 0 | 0 | not significant |
| 1178 | GO_REGULATION_OF_INCLUSION_BODY_ASSEMBLY                            | -1.46 | 1.15 | 0 | 0 | 0 | not significant |
| 1179 | GO_POSITIVE_REGULATION_OF_TRANSCRIPTION_INITIATION_FROM_RNA_POLYMEI | -1.46 | 1.13 | 0 | 0 | 0 | not significant |
| 1180 | GO_QUINONE_BIOSYNTHETIC_PROCESS                                     | -1.46 | 1.13 | 0 | 0 | 0 | not significant |
| 1181 | GO_ENDONUCLEOLYTIC_CLEAVAGE_IN_ITS1_TO_SEPARATE_SSU_RRNA_FROM_5     | -1.46 | 1.11 | 0 | 0 | 0 | not significant |
| 1182 | GO_TRANSCRIPTION_FACTOR_TFTC_COMPLEX                                | -1.46 | 1.06 | 0 | 0 | 0 | not significant |
| 1183 | FEVR_CTNNB1_TARGETS_DN                                              | -1.45 | 4    | 0 | 0 | 0 | not significant |
| 1184 | GO_RNA_CATABOLIC_PROCESS                                            | -1.45 | 4    | 0 | 0 | 0 | not significant |
| 1185 | KEGG_UBIQUITIN_MEDIATED_PROTEOLYSIS                                 | -1.45 | 4    | 0 | 0 | 0 | not significant |
| 1186 | REACTOME_CLASS_I_MHC_MEDIATED_ANTIGEN_PROCESSING_PRESENTATION       | -1.45 | 4    | 0 | 0 | 0 | not significant |
| 1187 | REACTOME_UB_SPECIFIC_PROCESSING_PROTEASES                           | -1.45 | 4    | 0 | 0 | 0 | not significant |

|      |                                                                     |       |      |   |   |   |                 |
|------|---------------------------------------------------------------------|-------|------|---|---|---|-----------------|
| 1188 | SANSOM_APC_TARGETS_REQUIRE_MYC                                      | -1.45 | 4    | 0 | 0 | 0 | not significant |
| 1189 | WANG_LMO4_TARGETS_DN                                                | -1.45 | 4    | 0 | 0 | 0 | not significant |
| 1190 | WELCSH_BRCA1_TARGETS_DN                                             | -1.45 | 2.46 | 0 | 0 | 0 | not significant |
| 1191 | REACTOME_ABC_FAMILY_PROTEINS_MEDIATED_TRANSPORT                     | -1.45 | 2    | 0 | 0 | 0 | not significant |
| 1192 | GO_HELICASE_ACTIVITY                                                | -1.45 | 1.84 | 0 | 0 | 0 | not significant |
| 1193 | SESTO_RESPONSE_TO_UV_C1                                             | -1.45 | 1.54 | 0 | 0 | 0 | not significant |
| 1194 | GO_NEGATIVE_REGULATION_OF GRANULOCYTE DIFFERENTIATION               | -1.45 | 1.43 | 0 | 0 | 0 | not significant |
| 1195 | GO_KINASE_ACTIVATOR_ACTIVITY                                        | -1.45 | 1.42 | 0 | 0 | 0 | not significant |
| 1196 | GO_RESPONSE_TO_MAGNESIUM_ION                                        | -1.45 | 1.4  | 0 | 0 | 0 | not significant |
| 1197 | GO_NUCLEOSIDE_TRIPHOSPHATE_BIOSYNTHETIC_PROCESS                     | -1.45 | 1.33 | 0 | 0 | 0 | not significant |
| 1198 | GO_ADENYLYLTRANSFERASE_ACTIVITY                                     | -1.45 | 1.32 | 0 | 0 | 0 | not significant |
| 1199 | GO_OXIDATIVE_DNA_DEMETHYLATION                                      | -1.45 | 1.31 | 0 | 0 | 0 | not significant |
| 1200 | GO_POSITIVE_REGULATION_OF_CELLULAR_RESPIRATION                      | -1.45 | 1.31 | 0 | 0 | 0 | not significant |
| 1201 | GLI1_UP_V1_UP                                                       | -1.45 | 1.24 | 0 | 0 | 0 | not significant |
| 1202 | GO_BHLH_TRANSCRIPTION_FACTOR_BINDING                                | -1.45 | 1.24 | 0 | 0 | 0 | not significant |
| 1203 | GO_MOLYBDOPTERIN_COFACTOR_BIOSYNTHETIC_PROCESS                      | -1.45 | 1.24 | 0 | 0 | 0 | not significant |
| 1204 | ZHAN_MULTIPLE_MYELOMA_LB_UP                                         | -1.45 | 1.24 | 0 | 0 | 0 | not significant |
| 1205 | GO_SAGA_TYPE_COMPLEX                                                | -1.45 | 1.21 | 0 | 0 | 0 | not significant |
| 1206 | MYLLYKANGAS_AMPLIFICATION_HOT_SPOT_8                                | -1.45 | 1.2  | 0 | 0 | 0 | not significant |
| 1207 | GO_GLYCOLYTIC_PROCESS_THROUGH_FRUCTOSE_6_PHOSPHATE                  | -1.45 | 1.19 | 0 | 0 | 0 | not significant |
| 1208 | GO_NEGATIVE_REGULATION_OF_METANEPHROS_DEVELOPMENT                   | -1.45 | 1.19 | 0 | 0 | 0 | not significant |
| 1209 | GO_METHYL_CPG_BINDING                                               | -1.45 | 1.18 | 0 | 0 | 0 | not significant |
| 1210 | GO_SNORNA_PROCESSING                                                | -1.45 | 1.18 | 0 | 0 | 0 | not significant |
| 1211 | GO_POSITIVE_REGULATION_OF_PROTEIN_EXPORT_FROM_NUCLEUS               | -1.45 | 1.14 | 0 | 0 | 0 | not significant |
| 1212 | CHEN_LUNG_CANCER_SURVIVAL                                           | -1.45 | 1.13 | 0 | 0 | 0 | not significant |
| 1213 | LU_TUMOR_ENDOTHELIAL_MARKERS_UP                                     | -1.45 | 1.13 | 0 | 0 | 0 | not significant |
| 1214 | GO_REGULATION_OF_CELL_COMMUNICATION_BY_ELECTRICAL_COUPLING_INVOLV   | -1.45 | 1.12 | 0 | 0 | 0 | not significant |
| 1215 | GO_MULTIMERIC_RIBONUCLEASE_P_COMPLEX                                | -1.45 | 1.11 | 0 | 0 | 0 | not significant |
| 1216 | LU_TUMOR_VASCULATURE_UP                                             | -1.45 | 1.09 | 0 | 0 | 0 | not significant |
| 1217 | CHUANG_OXIDATIVE_STRESS_RESPONSE_DN                                 | -1.45 | 1.08 | 0 | 0 | 0 | not significant |
| 1218 | GO_REGULATION_OF KERATINOCYTE MIGRATION                             | -1.45 | 1.07 | 0 | 0 | 0 | not significant |
| 1219 | GO_NEGATIVE_REGULATION_OF_CELL_CYCLE_PROCESS                        | -1.44 | 4    | 0 | 0 | 0 | not significant |
| 1220 | GO_PROTEIN_MODIFICATION_BY_SMALL_PROTEIN_REMOVAL                    | -1.44 | 4    | 0 | 0 | 0 | not significant |
| 1221 | OISHI_CHOLANGIOMA_STEM_CELL_LIKE_UP                                 | -1.44 | 4    | 0 | 0 | 0 | not significant |
| 1222 | GO_PALLIUM_DEVELOPMENT                                              | -1.44 | 2.43 | 0 | 0 | 0 | not significant |
| 1223 | GO_NON_CANONICAL_WNT_SIGNALING_PATHWAY                              | -1.44 | 2.02 | 0 | 0 | 0 | not significant |
| 1224 | RASHI_RESPONSE_TO_IONIZING_RADIATION_5                              | -1.44 | 2    | 0 | 0 | 0 | not significant |
| 1225 | REACTOME_TNFR2_NON_CANONICAL_NF_KB_PATHWAY                          | -1.44 | 2    | 0 | 0 | 0 | not significant |
| 1226 | MARZEC_IL2_SIGNALING_UP                                             | -1.44 | 1.89 | 0 | 0 | 0 | not significant |
| 1227 | REACTOME_CLEC7A_DECTIN_1_SIGNALING                                  | -1.44 | 1.86 | 0 | 0 | 0 | not significant |
| 1228 | REACTOME_HDACS_DEACETYLATE_HISTONES                                 | -1.44 | 1.82 | 0 | 0 | 0 | not significant |
| 1229 | GROSS_HYPOXIA_VIA_HIF1A_UP                                          | -1.44 | 1.67 | 0 | 0 | 0 | not significant |
| 1230 | REACTOME_CYCLIN_A:CDK2_ASSOCIATED_EVENTS_AT_S_PHASE_ENTRY           | -1.44 | 1.55 | 0 | 0 | 0 | not significant |
| 1231 | GO_TAU_PROTEIN_BINDING                                              | -1.44 | 1.44 | 0 | 0 | 0 | not significant |
| 1232 | LEE_CALORIE_RESTRICTION_NEOCORTEX_DN                                | -1.44 | 1.39 | 0 | 0 | 0 | not significant |
| 1233 | GO_PROTEIN_O_LINKED_GLYCOSYLATION_VIA_SERINE                        | -1.44 | 1.33 | 0 | 0 | 0 | not significant |
| 1234 | GO_REGULATION_OF RNA POLYMERASE II TRANSCRIPTIONAL PREINITIATION CC | -1.44 | 1.27 | 0 | 0 | 0 | not significant |
| 1235 | GO_PSEUDOURIDINE_SYNTHASE_ACTIVITY                                  | -1.44 | 1.23 | 0 | 0 | 0 | not significant |
| 1236 | SUZUKI_RESPONSE_TO_TSA_AND_DECITABINE_1B                            | -1.44 | 1.22 | 0 | 0 | 0 | not significant |
| 1237 | GO_MHC_PROTEIN_COMPLEX_BINDING                                      | -1.44 | 1.2  | 0 | 0 | 0 | not significant |
| 1238 | GO_MODULATION_BY_HOST_OF_VIRAL_GENOME_REPLICATION                   | -1.44 | 1.2  | 0 | 0 | 0 | not significant |
| 1239 | GO_NEURON_NEURON_SYNAPTIC_TRANSMISSION                              | -1.44 | 1.2  | 0 | 0 | 0 | not significant |
| 1240 | GO_PROTEIN_INSERTION INTO MITOCHONDRIAL OUTER MEMBRANE              | -1.44 | 1.17 | 0 | 0 | 0 | not significant |
| 1241 | GARGALOVIC_RESPONSE_TO_OXIDIZED_PHOSPHOLIPIDS_GREEN_DN              | -1.44 | 1.16 | 0 | 0 | 0 | not significant |
| 1242 | GO_MYELIN_SHEATH_ADAXONAL_REGION                                    | -1.44 | 1.12 | 0 | 0 | 0 | not significant |
| 1243 | STONER_ESOPHAGEAL_CARCINOGENESIS_DN                                 | -1.44 | 1.12 | 0 | 0 | 0 | not significant |
| 1244 | GO_VENTRICULAR_CARDIAC_MUSCLE_CELL_DEVELOPMENT                      | -1.44 | 1.11 | 0 | 0 | 0 | not significant |
| 1245 | REACTOME_FRS_MEDIATED_FGFR2_SIGNALING                               | -1.44 | 1.11 | 0 | 0 | 0 | not significant |
| 1246 | GO_5_3_DNA_HELICASE_ACTIVITY                                        | -1.44 | 1.1  | 0 | 0 | 0 | not significant |
| 1247 | GO_MACROMOLECULE_TRANSMEMBRANE_TRANSPORTER_ACTIVITY                 | -1.44 | 1.1  | 0 | 0 | 0 | not significant |
| 1248 | GO_SEQUENCE_SPECIFIC_MRNA_BINDING                                   | -1.44 | 1.1  | 0 | 0 | 0 | not significant |
| 1249 | GO_REGULATION_OF_CELL_COMMUNICATION_BY_ELECTRICAL_COUPLING          | -1.44 | 1.09 | 0 | 0 | 0 | not significant |
| 1250 | REACTOME_FRS_MEDIATED_FGFR4_SIGNALING                               | -1.44 | 1.09 | 0 | 0 | 0 | not significant |
| 1251 | RAMPON_ENRICHED_LEARNING_ENVIRONMENT_EARLY_UP                       | -1.44 | 1.08 | 0 | 0 | 0 | not significant |
| 1252 | MATZUK_IMPLANTATION_AND_UTERINE                                     | -1.44 | 1.04 | 0 | 0 | 0 | not significant |
| 1253 | BLALOCK_ALZHEIMERS_DISEASE_DN                                       | -1.43 | 4    | 0 | 0 | 0 | not significant |
| 1254 | GO_PROTEIN_FOLDING                                                  | -1.43 | 4    | 0 | 0 | 0 | not significant |
| 1255 | REACTOME_C_TYPE_LECTIN_RECEPTORS_CLRS                               | -1.43 | 2.15 | 0 | 0 | 0 | not significant |
| 1256 | GO_INTERLEUKIN_1_MEDIATED_SIGNALING_PATHWAY                         | -1.43 | 2.01 | 0 | 0 | 0 | not significant |
| 1257 | GO_ESTABLISHMENT_OR_MAINTENANCE_OF_CELL_POLARITY                    | -1.43 | 1.92 | 0 | 0 | 0 | not significant |
| 1258 | GO_INNER_MITOCHONDRIAL_MEMBRANE_PROTEIN_COMPLEX                     | -1.43 | 1.87 | 0 | 0 | 0 | not significant |
| 1259 | GO_AMINE_METABOLIC_PROCESS                                          | -1.43 | 1.79 | 0 | 0 | 0 | not significant |
| 1260 | GO_LIMBIC_SYSTEM_DEVELOPMENT                                        | -1.43 | 1.7  | 0 | 0 | 0 | not significant |
| 1261 | MORI_PRE_BI_LYMPHOCYTE_UP                                           | -1.43 | 1.68 | 0 | 0 | 0 | not significant |
| 1262 | SARRIO_EPITHELIAL_MESENCHYMAL_TRANSITION_UP                         | -1.43 | 1.67 | 0 | 0 | 0 | not significant |
| 1263 | SMITH_LIVER_CANCER                                                  | -1.43 | 1.38 | 0 | 0 | 0 | not significant |
| 1264 | GO_CENTROMERE_COMPLEX_ASSEMBLY                                      | -1.43 | 1.36 | 0 | 0 | 0 | not significant |
| 1265 | REACTOME_RNA_POLYMERASE_I_TRANSCRIPTION_INITIATION                  | -1.43 | 1.36 | 0 | 0 | 0 | not significant |
| 1266 | REACTOME_INTRAFLAGELLAR_TRANSPORT                                   | -1.43 | 1.33 | 0 | 0 | 0 | not significant |
| 1267 | PID_HEDGEHOG_GLI_PATHWAY                                            | -1.43 | 1.28 | 0 | 0 | 0 | not significant |
| 1268 | GROSS_HYPOXIA_VIA_ELK3_ONLY_DN                                      | -1.43 | 1.25 | 0 | 0 | 0 | not significant |
| 1269 | GO_MEIOTIC_SPINDLE_ORGANIZATION                                     | -1.43 | 1.2  | 0 | 0 | 0 | not significant |
| 1270 | REACTOME_ACTIVATION_OF_AMPK_DOWNSTREAM_OF_NMDARS                    | -1.43 | 1.18 | 0 | 0 | 0 | not significant |
| 1271 | GO_LATERAL_VENTRICLE_DEVELOPMENT                                    | -1.43 | 1.15 | 0 | 0 | 0 | not significant |
| 1272 | GO_REGULATION_OF HOMOTYPIC_CELL_CELL_ADHESION                       | -1.43 | 1.15 | 0 | 0 | 0 | not significant |
| 1273 | GO_CATALYTIC_STEP_1_SPLICEOSOME                                     | -1.43 | 1.14 | 0 | 0 | 0 | not significant |
| 1274 | GO_NEGATIVE_REGULATION_OF_ESTABLISHMENT_OF PROTEIN LOCALIZATION TI  | -1.43 | 1.14 | 0 | 0 | 0 | not significant |
| 1275 | GO_PLASMINOGEN_ACTIVATION                                           | -1.43 | 1.14 | 0 | 0 | 0 | not significant |
| 1276 | GO_CYCLIN_DEPENDENT_PROTEIN_SERINE_THREONINE_KINASE_ACTIVATOR_ACTI  | -1.43 | 1.13 | 0 | 0 | 0 | not significant |
| 1277 | PID_IGF1_PATHWAY                                                    | -1.43 | 1.13 | 0 | 0 | 0 | not significant |
| 1278 | DORN_ADENOVIRUS_INFECTION_24HR_UP                                   | -1.43 | 1.12 | 0 | 0 | 0 | not significant |
| 1279 | FIRESTEIN_CTNB1_PATHWAY                                             | -1.43 | 1.12 | 0 | 0 | 0 | not significant |
| 1280 | GO_ARP2_3_PROTEIN_COMPLEX                                           | -1.43 | 1.1  | 0 | 0 | 0 | not significant |
| 1281 | GO_POSITIVE_REGULATION_OF_RYANODINE_SENSITIVE_CALCIIUM_RELEASE_CHAN | -1.43 | 1.09 | 0 | 0 | 0 | not significant |
| 1282 | VANDESLUIS_COMMD1_TARGETS_GROUP_2_UP                                | -1.43 | 1.09 | 0 | 0 | 0 | not significant |
| 1283 | GO_HISTONE_PRE_MRNA_3_END_PROCESSING_COMPLEX                        | -1.43 | 1.07 | 0 | 0 | 0 | not significant |
| 1284 | GO_CDC42_PROTEIN_SIGNAL_TRANSDUCTION                                | -1.43 | 1.06 | 0 | 0 | 0 | not significant |
| 1285 | GO_PROTEASOME_REGULATORY_PARTICLE_LID_SUBCOMPLEX                    | -1.43 | 1.06 | 0 | 0 | 0 | not significant |
| 1286 | GO_RNA_POLYMERASE_II_GENERAL_TRANSCRIPTION_INITIATION_FACTOR BINDIN | -1.43 | 1.06 | 0 | 0 | 0 | not significant |
| 1287 | BIOCARTA_TEL_PATHWAY                                                | -1.43 | 1.04 | 0 | 0 | 0 | not significant |
| 1288 | GO_CULLIN_FAMILY_PROTEIN_BINDING                                    | -1.43 | 1.04 | 0 | 0 | 0 | not significant |
| 1289 | REACTOME_FRS_MEDIATED_FGFR3_SIGNALING                               | -1.43 | 1.03 | 0 | 0 | 0 | not significant |
| 1290 | CHANDRAN_METASTASIS_UP                                              | -1.42 | 4    | 0 | 0 | 0 | not significant |
| 1291 | GO_CATALYTIC_COMPLEX                                                | -1.42 | 4    | 0 | 0 | 0 | not significant |
| 1292 | GO_NEGATIVE_REGULATION_OF_MITOTIC_CELL_CYCLE                        | -1.42 | 4    | 0 | 0 | 0 | not significant |
| 1293 | GO_POLYMERIC_CYTOSKELETAL_FIBER                                     | -1.42 | 4    | 0 | 0 | 0 | not significant |
| 1294 | REACTOME_GENE_EXPRESSION_TRANSCRIPTION                              | -1.42 | 4    | 0 | 0 | 0 | not significant |
| 1295 | VILLANUEVA_LIVER_CANCER_KRT19_UP                                    | -1.42 | 2.37 | 0 | 0 | 0 | not significant |
| 1296 | GO_GENE_SILENCING_BY_RNA                                            | -1.42 | 2.17 | 0 | 0 | 0 | not significant |



|      |                                                                    |       |      |   |   |   |                 |
|------|--------------------------------------------------------------------|-------|------|---|---|---|-----------------|
| 1297 | GO_PROTEIN_LOCALIZATION_TO_NUCLEUS                                 | -1.42 | 2.03 | 0 | 0 | 0 | not significant |
| 1298 | REACTOME_COPI_MEDIATED_ANTEROGRADE_TRANSPORT                       | -1.42 | 1.87 | 0 | 0 | 0 | not significant |
| 1299 | GO_GLYCOLYTIC_PROCESS                                              | -1.42 | 1.68 | 0 | 0 | 0 | not significant |
| 1300 | KEGG_GAP_JUNCTION                                                  | -1.42 | 1.53 | 0 | 0 | 0 | not significant |
| 1301 | GO_INTERACTION_WITH_SYMBIONT                                       | -1.42 | 1.49 | 0 | 0 | 0 | not significant |
| 1302 | GO_ANTIGEN_PROCESSING_AND_PRESENTATION_OF_EXOGENOUS_PEPTIDE_ANTI   | -1.42 | 1.47 | 0 | 0 | 0 | not significant |
| 1303 | GO_RESPONSE_TO_ANESTHETIC                                          | -1.42 | 1.42 | 0 | 0 | 0 | not significant |
| 1304 | REACTOME_REGULATION_OF_ACTIN_DYNAMICS_FOR_PHAGOCYTTIC_CUP_FORMA1   | -1.42 | 1.4  | 0 | 0 | 0 | not significant |
| 1305 | BROWNE_HCMV_INFECTION_10HR_DN                                      | -1.42 | 1.33 | 0 | 0 | 0 | not significant |
| 1306 | KORKOLA_SEMINOMA_UP                                                | -1.42 | 1.33 | 0 | 0 | 0 | not significant |
| 1307 | GO_BLASTOCYST_FORMATION                                            | -1.42 | 1.23 | 0 | 0 | 0 | not significant |
| 1308 | GO_DISORDERED_DOMAIN_SPECIFIC_BINDING                              | -1.42 | 1.22 | 0 | 0 | 0 | not significant |
| 1309 | GO_U12_TYPE_SPLICEOSOMAL_COMPLEX                                   | -1.42 | 1.2  | 0 | 0 | 0 | not significant |
| 1310 | SHIN_B_CELL_LYMPHOMA_CLUSTER_7                                     | -1.42 | 1.2  | 0 | 0 | 0 | not significant |
| 1311 | CHEEK_RESPONSE_TO_MERCAPTOPURINE_AND_HD_MTX_UP                     | -1.42 | 1.18 | 0 | 0 | 0 | not significant |
| 1312 | YH_RESPONSE_TO_ARSENITE_C1                                         | -1.42 | 1.18 | 0 | 0 | 0 | not significant |
| 1313 | GO_MICOS_COMPLEX                                                   | -1.42 | 1.16 | 0 | 0 | 0 | not significant |
| 1314 | GO_REGULATION_OF_SMAD_PROTEIN_COMPLEX_ASSEMBLY                     | -1.42 | 1.14 | 0 | 0 | 0 | not significant |
| 1315 | GO_RIBOSOMAL_SMALL_SUBUNIT_EXPORT_FROM_NUCLEUS                     | -1.42 | 1.14 | 0 | 0 | 0 | not significant |
| 1316 | CHR17P12                                                           | -1.42 | 1.13 | 0 | 0 | 0 | not significant |
| 1317 | GO_2_IRON_2_SULFUR_CLUSTER_BINDING                                 | -1.42 | 1.13 | 0 | 0 | 0 | not significant |
| 1318 | GO_HISTONE_H4_R3_METHYLATION                                       | -1.42 | 1.13 | 0 | 0 | 0 | not significant |
| 1319 | GO_POSITIVE_REGULATION_OF_TRANSCRIPTION_BY_RNA_POLYMERASE_III      | -1.42 | 1.12 | 0 | 0 | 0 | not significant |
| 1320 | GO_MALE_MATING_BEHAVIOR                                            | -1.42 | 1.11 | 0 | 0 | 0 | not significant |
| 1321 | GO_MITOCHONDRION_DISTRIBUTION                                      | -1.42 | 1.11 | 0 | 0 | 0 | not significant |
| 1322 | GO_SPINDLE_MIDZONE_ASSEMBLY                                        | -1.42 | 1.11 | 0 | 0 | 0 | not significant |
| 1323 | GO_ENTRAINMENT_OF_CIRCADIAN_CLOCK_BY_PHOTOPERIOD                   | -1.42 | 1.1  | 0 | 0 | 0 | not significant |
| 1324 | BIOCARTA_PTC1_PATHWAY                                              | -1.42 | 1.09 | 0 | 0 | 0 | not significant |
| 1325 | GO_NEGATIVE_REGULATION_OF_EPITHELIAL_TO_MESENCHYMAL_TRANSITION     | -1.42 | 1.09 | 0 | 0 | 0 | not significant |
| 1326 | GO_ENDOCYTTIC_ADAPTOR_ACTIVITY                                     | -1.42 | 1.08 | 0 | 0 | 0 | not significant |
| 1327 | GO_RESPONSE_TO_VITAMIN_A                                           | -1.42 | 1.07 | 0 | 0 | 0 | not significant |
| 1328 | FARMER_BREAST_CANCER_CLUSTER_5                                     | -1.42 | 1.06 | 0 | 0 | 0 | not significant |
| 1329 | REACTOME_ACTIVATED_NTRK2_SIGNALS_THROUGH_FRS2_AND_FRS3             | -1.42 | 1.06 | 0 | 0 | 0 | not significant |
| 1330 | REACTOME_REGULATION_OF_PYRUVATE_DEHYDROGENASE_PDH_COMPLEX          | -1.42 | 1.06 | 0 | 0 | 0 | not significant |
| 1331 | CERIBELLI_PROMOTERS_INACTIVE_AND_BOUND_BY_NFY                      | -1.42 | 1.05 | 0 | 0 | 0 | not significant |
| 1332 | GO_OUTFLOW_TRACT_SEPTUM_MORPHOGENESIS                              | -1.42 | 1.04 | 0 | 0 | 0 | not significant |
| 1333 | GO_SARCOPLASMIC_RETICULUM_CALCIIUM_ION_TRANSPORT                   | -1.42 | 1.03 | 0 | 0 | 0 | not significant |
| 1334 | REACTOME_IL_6_TYPE_CYTOKINE_RECEPTOR_LIGAND_INTERACTIONS           | -1.42 | 1.03 | 0 | 0 | 0 | not significant |
| 1335 | REACTOME_PURINE_RIBONUCLEOSIDE_MONOPHOSPHATE_BIOSYNTHESIS          | -1.42 | 1.03 | 0 | 0 | 0 | not significant |
| 1336 | GO_RIBOSOMAL_LARGE_SUBUNIT_EXPORT_FROM_NUCLEUS                     | -1.42 | 1.01 | 0 | 0 | 0 | not significant |
| 1337 | REACTOME_MASTL_FACILITATES_MITOTIC_PROGRESSION                     | -1.42 | 0.99 | 0 | 0 | 0 | not significant |
| 1338 | GO_ADENYL_NUCLEOTIDE_BINDING                                       | -1.41 | 4    | 0 | 0 | 0 | not significant |
| 1339 | GO_DRUG_BINDING                                                    | -1.41 | 4    | 0 | 0 | 0 | not significant |
| 1340 | GO_NEGATIVE_REGULATION_OF_CELL_CYCLE_PHASE_TRANSITION              | -1.41 | 4    | 0 | 0 | 0 | not significant |
| 1341 | GO_REGULATION_OF_PROTEIN_STABILITY                                 | -1.41 | 4    | 0 | 0 | 0 | not significant |
| 1342 | GO_SUPRAMOLECULAR_COMPLEX                                          | -1.41 | 4    | 0 | 0 | 0 | not significant |
| 1343 | JOHNSTONE_PARVB_TARGETS_2_DN                                       | -1.41 | 4    | 0 | 0 | 0 | not significant |
| 1344 | GO_TRANSFERASE_COMPLEX_TRANSFERRING_PHOSPHORUS_CONTAINING_GROU     | -1.41 | 2.04 | 0 | 0 | 0 | not significant |
| 1345 | WATANABE_RECTAL_CANCER_RADIOOTHERAPY_RESPONSIVE_DN                 | -1.41 | 1.93 | 0 | 0 | 0 | not significant |
| 1346 | DITTMER_PTHLH_TARGETS_UP                                           | -1.41 | 1.85 | 0 | 0 | 0 | not significant |
| 1347 | EIF4E_UP                                                           | -1.41 | 1.75 | 0 | 0 | 0 | not significant |
| 1348 | BROWNE_HCMV_INFECTION_12HR_UP                                      | -1.41 | 1.72 | 0 | 0 | 0 | not significant |
| 1349 | REACTOME_ANTIGEN_PROCESSING_CROSS_PRESENTATION                     | -1.41 | 1.67 | 0 | 0 | 0 | not significant |
| 1350 | GCNP_SHH_UP_EARLY_V1_UP                                            | -1.41 | 1.61 | 0 | 0 | 0 | not significant |
| 1351 | REACTOME_INTEGRATION_OF_ENERGY_METABOLISM                          | -1.41 | 1.55 | 0 | 0 | 0 | not significant |
| 1352 | REACTOME_RNA_POLYMERASE_I_PROMOTER_ESCAPE                          | -1.41 | 1.55 | 0 | 0 | 0 | not significant |
| 1353 | GO_POSITIVE_REGULATION_OF_PROTEIN_LOCALIZATION_TO_NUCLEUS          | -1.41 | 1.47 | 0 | 0 | 0 | not significant |
| 1354 | CHNG_MULTIPLE_MYELOMA_HYPERPLOID_DN                                | -1.41 | 1.3  | 0 | 0 | 0 | not significant |
| 1355 | CHR5Q33                                                            | -1.41 | 1.28 | 0 | 0 | 0 | not significant |
| 1356 | GO_ENTRAINMENT_OF_CIRCADIAN_CLOCK                                  | -1.41 | 1.27 | 0 | 0 | 0 | not significant |
| 1357 | GO_CARTILAGE_DEVELOPMENT_INVOLVED_IN_ENDOCHONDRAL_BONE_MORPHOG     | -1.41 | 1.21 | 0 | 0 | 0 | not significant |
| 1358 | BIOCARTA_SALMONELLA_PATHWAY                                        | -1.41 | 1.2  | 0 | 0 | 0 | not significant |
| 1359 | REACTOME_DAG_AND_IP3_SIGNALING                                     | -1.41 | 1.2  | 0 | 0 | 0 | not significant |
| 1360 | XU_HGF_TARGETS_INDUCED_BY_AKT1_48HR_DN                             | -1.41 | 1.2  | 0 | 0 | 0 | not significant |
| 1361 | HWANG_PROSTATE_CANCER_MARKERS                                      | -1.41 | 1.15 | 0 | 0 | 0 | not significant |
| 1362 | BIOCARTA_SRCRPT_PATHWAY                                            | -1.41 | 1.14 | 0 | 0 | 0 | not significant |
| 1363 | GO_ESTABLISHMENT_OF_PROTEIN_LOCALIZATION_TO_MITOCHONDRIAL_MEMBRAI  | -1.41 | 1.14 | 0 | 0 | 0 | not significant |
| 1364 | GO_RESPONSE_TO_COPPER_ION                                          | -1.41 | 1.13 | 0 | 0 | 0 | not significant |
| 1365 | REACTOME_ERKS_ARE_INACTVATED                                       | -1.41 | 1.12 | 0 | 0 | 0 | not significant |
| 1366 | GO_IRON_SULFUR_CLUSTER_ASSEMBLY                                    | -1.41 | 1.11 | 0 | 0 | 0 | not significant |
| 1367 | GO_PROTEASOME_BINDING                                              | -1.41 | 1.11 | 0 | 0 | 0 | not significant |
| 1368 | GO_SMN_COMPLEX                                                     | -1.41 | 1.09 | 0 | 0 | 0 | not significant |
| 1369 | YORDY_RECIPROCAL_REGULATION_BY_ETS1_AND_SP100_UP                   | -1.41 | 1.08 | 0 | 0 | 0 | not significant |
| 1370 | GO_BINDING_OF_SPERM_TO_ZONA_PELLUCIDA                              | -1.41 | 1.07 | 0 | 0 | 0 | not significant |
| 1371 | BIOCARTA_RAN_PATHWAY                                               | -1.41 | 1.06 | 0 | 0 | 0 | not significant |
| 1372 | GO_HEART TRABECULA FORMATION                                       | -1.41 | 1.06 | 0 | 0 | 0 | not significant |
| 1373 | GO_SUCCINATE_METABOLIC_PROCESS                                     | -1.41 | 1.05 | 0 | 0 | 0 | not significant |
| 1374 | GO_ADENYL_NUCLEOTIDE_EXCHANGE_FACTOR_ACTIVITY                      | -1.41 | 1.02 | 0 | 0 | 0 | not significant |
| 1375 | GO_POSITIVE_REGULATION_OF_AMYLOID_PRECURSOR_PROTEIN_CATABOLIC_PR   | -1.41 | 1.01 | 0 | 0 | 0 | not significant |
| 1376 | GAVIN_IL2_RESPONSIVE_FOXP3_TARGETS_UP                              | -1.41 | 0.96 | 0 | 0 | 0 | not significant |
| 1377 | PUJANA_ATM_PCC_NETWORK                                             | -1.40 | 4    | 0 | 0 | 0 | not significant |
| 1378 | REACTOME_ADAPTIVE_IMMUNE_SYSTEM                                    | -1.40 | 4    | 0 | 0 | 0 | not significant |
| 1379 | HALLMARK_MTORC1_SIGNALING                                          | -1.40 | 2.36 | 0 | 0 | 0 | not significant |
| 1380 | GO_NUCLEOSOME_ORGANIZATION                                         | -1.40 | 1.93 | 0 | 0 | 0 | not significant |
| 1381 | GO_MICROTUBULE_BASED_MOVEMENT                                      | -1.40 | 1.92 | 0 | 0 | 0 | not significant |
| 1382 | MISSIAGLIA_REGULATED_BY_METHYLATION_DN                             | -1.40 | 1.87 | 0 | 0 | 0 | not significant |
| 1383 | CROONQUIST_NRAS_VS_STROMAL_STIMULATION_DN                          | -1.40 | 1.83 | 0 | 0 | 0 | not significant |
| 1384 | SMIRNOV_RESPONSE_TO_IR_6HR_DN                                      | -1.40 | 1.61 | 0 | 0 | 0 | not significant |
| 1385 | GO_REGULATION_OF_VIRAL_TRANSCRIPTION                               | -1.40 | 1.51 | 0 | 0 | 0 | not significant |
| 1386 | SAKAI_CHRONIC_HEPATITIS_VS_LIVER_CANCER_UP                         | -1.40 | 1.46 | 0 | 0 | 0 | not significant |
| 1387 | TURASHVILI_BREAST_DUCTAL_CARCINOMA_VS_LOBULAR_NORMAL_UP            | -1.40 | 1.41 | 0 | 0 | 0 | not significant |
| 1388 | GO_POSITIVE_REGULATION_OF_PROTEIN_LOCALIZATION_TO_CELL_PERIPHERY   | -1.40 | 1.4  | 0 | 0 | 0 | not significant |
| 1389 | GO_CHROMOSOME_CONDENSATION                                         | -1.40 | 1.3  | 0 | 0 | 0 | not significant |
| 1390 | REACTOME_SIGNALING_BY_NOTCH3                                       | -1.40 | 1.23 | 0 | 0 | 0 | not significant |
| 1391 | ZHU_CMV_8_HR_DN                                                    | -1.40 | 1.21 | 0 | 0 | 0 | not significant |
| 1392 | REACTOME_GOLGI_ASSOCIATED_VESICLE_BIOGENESIS                       | -1.40 | 1.2  | 0 | 0 | 0 | not significant |
| 1393 | GO_SPERM_EGG_RECOGNITION                                           | -1.40 | 1.17 | 0 | 0 | 0 | not significant |
| 1394 | GO_PROSTATE_GLAND_DEVELOPMENT                                      | -1.40 | 1.16 | 0 | 0 | 0 | not significant |
| 1395 | GO_REGULATION_OF_EPITHELIAL_TO_MESENCHYMAL_TRANSITION              | -1.40 | 1.15 | 0 | 0 | 0 | not significant |
| 1396 | GO_REGULATION_OF_RYANODINE_SENSITIVE_CALCIIUM_RELEASE_CHANNEL_ACTI | -1.40 | 1.11 | 0 | 0 | 0 | not significant |
| 1397 | GO_POLYNUCLEOTIDE_ADENYLTRANSFERASE_ACTIVITY                       | -1.40 | 1.09 | 0 | 0 | 0 | not significant |
| 1398 | BIOCARTA_AT1R_PATHWAY                                              | -1.40 | 1.07 | 0 | 0 | 0 | not significant |
| 1399 | GO_NEGATIVE_REGULATION_OF_NEURON_PROJECTION_REGENERATION           | -1.40 | 1.07 | 0 | 0 | 0 | not significant |
| 1400 | REACTOME_G_PROTEIN_MEDIATED_EVENTS                                 | -1.40 | 1.07 | 0 | 0 | 0 | not significant |
| 1401 | GO_DENSE_CORE_GRANULE_TRANSPORT                                    | -1.40 | 1.06 | 0 | 0 | 0 | not significant |
| 1402 | GO_RNA_POLYMERASE_II_CTD_HEPTAPEPTIDE_REPEAT_KINASE_ACTIVITY       | -1.40 | 1.06 | 0 | 0 | 0 | not significant |
| 1403 | GO_COMPACT_MYELIN                                                  | -1.40 | 1.04 | 0 | 0 | 0 | not significant |
| 1404 | GO_KIDNEY_MESENCHYME_DEVELOPMENT                                   | -1.40 | 1.04 | 0 | 0 | 0 | not significant |
| 1405 | GO_MITOCHONDRIAL_RNA_3_END_PROCESSING                              | -1.40 | 1.04 | 0 | 0 | 0 | not significant |

|      |                                                                    |       |      |   |   |   |                 |
|------|--------------------------------------------------------------------|-------|------|---|---|---|-----------------|
| 1406 | MINGUEZ_LIVER_CANCER_VASCULAR_INVASION_UP                          | -1.40 | 1.01 | 0 | 0 | 0 | not significant |
| 1407 | GO_PRE_MIRNA_BINDING                                               | -1.40 | 1    | 0 | 0 | 0 | not significant |
| 1408 | GO_GLUCCOSE_BINDING                                                | -1.40 | 0.99 | 0 | 0 | 0 | not significant |
| 1409 | GO_HEART TRABECULA MORPHOGENESIS                                   | -1.40 | 0.99 | 0 | 0 | 0 | not significant |
| 1410 | GO_NEGATIVE_REGULATION_OF_ANDROGEN_RECEPTOR_SIGNALING_PATHWAY      | -1.40 | 0.99 | 0 | 0 | 0 | not significant |
| 1411 | GO_CYCLOSPORIN_A_BINDING                                           | -1.40 | 0.97 | 0 | 0 | 0 | not significant |
| 1412 | GO_NEGATIVE_REGULATION_OF_ORGANELLE_ORGANIZATION                   | -1.39 | 4    | 0 | 0 | 0 | not significant |
| 1413 | GO_REGULATION_OF_SIGNAL_TRANSDUCTION_BY_P53_CLASS_MEDIATOR         | -1.39 | 2.42 | 0 | 0 | 0 | not significant |
| 1414 | REACTOME_TRANSLATION                                               | -1.39 | 2.31 | 0 | 0 | 0 | not significant |
| 1415 | GO_REGULATION_OF_ANIMAL_ORGAN_MORPHOGENESIS                        | -1.39 | 2.08 | 0 | 0 | 0 | not significant |
| 1416 | GCNP_SHH_UP_LATE.V1_UP                                             | -1.39 | 1.91 | 0 | 0 | 0 | not significant |
| 1417 | GO_REGULATION_OF_TRANSLATIONAL_INITIATION                          | -1.39 | 1.75 | 0 | 0 | 0 | not significant |
| 1418 | REACTOME_RNA_POLYMERASE_I_TRANSCRIPTION                            | -1.39 | 1.71 | 0 | 0 | 0 | not significant |
| 1419 | GO_REGULATION_OF_GENE_SILENCING                                    | -1.39 | 1.69 | 0 | 0 | 0 | not significant |
| 1420 | HALLMARK_PI3K_AKT_MTOR_SIGNALING                                   | -1.39 | 1.64 | 0 | 0 | 0 | not significant |
| 1421 | GO_REGULATION_OF_PROTEIN_LOCALIZATION_TO_NUCLEUS                   | -1.39 | 1.63 | 0 | 0 | 0 | not significant |
| 1422 | REACTOME_ER_TO_GOLGI_ANTEROGRADE_TRANSPORT                         | -1.39 | 1.62 | 0 | 0 | 0 | not significant |
| 1423 | GO_POSITIVE_REGULATION_OF_VIRAL_PROCESS                            | -1.39 | 1.59 | 0 | 0 | 0 | not significant |
| 1424 | IKEDA_MIR30_TARGETS_UP                                             | -1.39 | 1.56 | 0 | 0 | 0 | not significant |
| 1425 | GO_MODIFICATION_OF_MORPHOLOGY_OR_PHYSIOLOGY_OF_OTHER_ORGANISM      | -1.39 | 1.3  | 0 | 0 | 0 | not significant |
| 1426 | BRUINS_LVC_RESPONSE_VIA_TP53_GROUP_C                               | -1.39 | 1.27 | 0 | 0 | 0 | not significant |
| 1427 | CHR14Q22                                                           | -1.39 | 1.25 | 0 | 0 | 0 | not significant |
| 1428 | SWEET_KRAS_TARGETS_DN                                              | -1.39 | 1.23 | 0 | 0 | 0 | not significant |
| 1429 | GO_REGULATION_OF_PROTEIN_LOCALIZATION_TO_CELL_CORTEX               | -1.39 | 1.19 | 0 | 0 | 0 | not significant |
| 1430 | VANTVEER_BREAST_CANCER_BRCA1_UP                                    | -1.39 | 1.18 | 0 | 0 | 0 | not significant |
| 1431 | BIOCARTA_PYK2_PATHWAY                                              | -1.39 | 1.16 | 0 | 0 | 0 | not significant |
| 1432 | GUTIERREZ_MULTIPLE_MYELOMA_UP                                      | -1.39 | 1.16 | 0 | 0 | 0 | not significant |
| 1433 | REACTOME_HIV_ELONGATION_ARREST_AND_RECOVERY                        | -1.39 | 1.16 | 0 | 0 | 0 | not significant |
| 1434 | REACTOME_METABOLIC_DISORDERS_OF_BIOLOGICAL_OXIDATION_ENZYMES       | -1.39 | 1.16 | 0 | 0 | 0 | not significant |
| 1435 | REACTOME_VEGFR2_MEDIATED_VASCULAR_PERMEABILITY                     | -1.39 | 1.15 | 0 | 0 | 0 | not significant |
| 1436 | GO_GLANDULAR_EPITHELIAL_CELL_DIFFERENTIATION                       | -1.39 | 1.14 | 0 | 0 | 0 | not significant |
| 1437 | CHR2P22                                                            | -1.39 | 1.13 | 0 | 0 | 0 | not significant |
| 1438 | KEGG_FRUCTOSE_AND_MANNOSE_METABOLISM                               | -1.39 | 1.11 | 0 | 0 | 0 | not significant |
| 1439 | KEGG_TYPE_II_DIABETES_MELLITUS                                     | -1.39 | 1.11 | 0 | 0 | 0 | not significant |
| 1440 | REACTOME_HSF1_ACTIVATION                                           | -1.39 | 1.1  | 0 | 0 | 0 | not significant |
| 1441 | GO_AZOLE_TRANSPORT                                                 | -1.39 | 1.08 | 0 | 0 | 0 | not significant |
| 1442 | GO_NEGATIVE_REGULATION_OF_INTRINSIC_APOPTOTIC_SIGNALING_PATHWAY_BY | -1.39 | 1.06 | 0 | 0 | 0 | not significant |
| 1443 | GO_POSITIVE_REGULATION_OF_AMYLOID_BETA_FORMATION                   | -1.39 | 1.06 | 0 | 0 | 0 | not significant |
| 1444 | GO_ELL_EAF_COMPLEX                                                 | -1.39 | 1.04 | 0 | 0 | 0 | not significant |
| 1445 | REACTOME_CTAA4_INHIBITORY_SIGNALING                                | -1.39 | 1.04 | 0 | 0 | 0 | not significant |
| 1446 | GO_REGULATION_OF_CARDIAC_MUSCLE_CONTRACTION_BY_CALCIUM_ION_SIGNA   | -1.39 | 1.03 | 0 | 0 | 0 | not significant |
| 1447 | BIOCARTA_IGF1MTOR_PATHWAY                                          | -1.39 | 1.02 | 0 | 0 | 0 | not significant |
| 1448 | FARDIN_HYPOXIA_9                                                   | -1.39 | 1.02 | 0 | 0 | 0 | not significant |
| 1449 | GO_MAINTENANCE_OF_APICAL_BASAL_CELL_POLARITY                       | -1.39 | 1.02 | 0 | 0 | 0 | not significant |
| 1450 | REACTOME_MET_ACTIVATES_RAP1_AND_RAC1                               | -1.39 | 1.01 | 0 | 0 | 0 | not significant |
| 1451 | GO_LRR_DOMAIN_BINDING                                              | -1.39 | 1    | 0 | 0 | 0 | not significant |
| 1452 | KANG_CISPLATIN_RESISTANCE_DN                                       | -1.39 | 1    | 0 | 0 | 0 | not significant |
| 1453 | REACTOME_THROMBOXANE_SIGNALLING_THROUGH_TP_RECEPTOR                | -1.39 | 1    | 0 | 0 | 0 | not significant |
| 1454 | GO_PHOTOPERIODISM                                                  | -1.39 | 0.99 | 0 | 0 | 0 | not significant |
| 1455 | GO_TRNA_3_END_PROCESSING                                           | -1.39 | 0.99 | 0 | 0 | 0 | not significant |
| 1456 | KEGG_PHENYLALANINE_METABOLISM                                      | -1.39 | 0.99 | 0 | 0 | 0 | not significant |
| 1457 | GO_REGULATION_OF_MEMBRANE_PROTEIN_ECTODOMAIN_PROTEOLYSIS           | -1.39 | 0.98 | 0 | 0 | 0 | not significant |
| 1458 | GO_UBIQUITIN_PROTEIN_TRANSFERASE_REGULATOR_ACTIVITY                | -1.39 | 0.98 | 0 | 0 | 0 | not significant |
| 1459 | REACTOME_ARMS_MEDIATED_ACTIVATION                                  | -1.39 | 0.98 | 0 | 0 | 0 | not significant |
| 1460 | GO_DE_NOVO_PYRIMIDINE_NUCLEOBASE_BIOSYNTHETIC_PROCESS              | -1.39 | 0.97 | 0 | 0 | 0 | not significant |
| 1461 | OLSSON_E2F3_TARGETS_UP                                             | -1.39 | 0.97 | 0 | 0 | 0 | not significant |
| 1462 | GO_RNA_POLYMERASE_I_COMPLEX                                        | -1.39 | 0.93 | 0 | 0 | 0 | not significant |
| 1463 | GO_DNA_PACKAGING                                                   | -1.38 | 4    | 0 | 0 | 0 | not significant |
| 1464 | GO_NUCLEOPLASM_PART                                                | -1.38 | 4    | 0 | 0 | 0 | not significant |
| 1465 | GO_RIBONUCLEOTIDE_BINDING                                          | -1.38 | 4    | 0 | 0 | 0 | not significant |
| 1466 | LINDGREN_BLADDER_CANCER_CLUSTER_3_UP                               | -1.38 | 4    | 0 | 0 | 0 | not significant |
| 1467 | WANG_SMARCE1_TARGETS_DN                                            | -1.38 | 2.25 | 0 | 0 | 0 | not significant |
| 1468 | REACTOME_FC_EPSILON_RECEPTOR_FCER1_SIGNALING                       | -1.38 | 2.15 | 0 | 0 | 0 | not significant |
| 1469 | REACTOME_DEUBIQUITINATION                                          | -1.38 | 2.01 | 0 | 0 | 0 | not significant |
| 1470 | GO_ESTABLISHMENT_OF_CELL_POLARITY                                  | -1.38 | 1.61 | 0 | 0 | 0 | not significant |
| 1471 | TAKAO_RESPONSE_TO_UVB_RADIATION_DN                                 | -1.38 | 1.6  | 0 | 0 | 0 | not significant |
| 1472 | GO_DNA_REPLICATION_INDEPENDENT_NUCLEOSOME_ORGANIZATION             | -1.38 | 1.35 | 0 | 0 | 0 | not significant |
| 1473 | PID_FOXO_PATHWAY                                                   | -1.38 | 1.31 | 0 | 0 | 0 | not significant |
| 1474 | GO_CELLULAR_SENESCENCE                                             | -1.38 | 1.3  | 0 | 0 | 0 | not significant |
| 1475 | REACTOME_TRANSLOCATION_OF_SLC2A4_Glut4_TO_THE_PLASMA_MEMBRANE      | -1.38 | 1.3  | 0 | 0 | 0 | not significant |
| 1476 | KYNG_RESPONSE_TO_H2O2_VIA_ERCC6_UP                                 | -1.38 | 1.12 | 0 | 0 | 0 | not significant |
| 1477 | GO_REGULATION_OF_ACTION_POTENTIAL                                  | -1.38 | 1.09 | 0 | 0 | 0 | not significant |
| 1478 | CHR2Q32                                                            | -1.38 | 1.08 | 0 | 0 | 0 | not significant |
| 1479 | GO_ALDITOL_CATABOLIC_PROCESS                                       | -1.38 | 1.08 | 0 | 0 | 0 | not significant |
| 1480 | REACTOME_GLUCCAGON LIKE PEPTIDE 1_GLP1_REGULATES_INSULIN_SECRETION | -1.38 | 1.07 | 0 | 0 | 0 | not significant |
| 1481 | GO_SNRNA_PROCESSING                                                | -1.38 | 1.05 | 0 | 0 | 0 | not significant |
| 1482 | REACTOME_PINK_PARKIN_MEDIATED_MITOPHAGY                            | -1.38 | 1.05 | 0 | 0 | 0 | not significant |
| 1483 | FUKUSHIMA_TNFSF11_TARGETS                                          | -1.38 | 1.04 | 0 | 0 | 0 | not significant |
| 1484 | GO_POSITIVE_REGULATION_OF_PATHWAY_RESTRICTED_SMAD_PROTEIN_PHOSPH   | -1.38 | 1.03 | 0 | 0 | 0 | not significant |
| 1485 | REACTOME_SHC_RELATED_EVENTS_TRIGGERED_BY_IGF1R                     | -1.38 | 1.03 | 0 | 0 | 0 | not significant |
| 1486 | BIOCARTA_NUCLEARRS_PATHWAY                                         | -1.38 | 1.02 | 0 | 0 | 0 | not significant |
| 1487 | GO_DNA_TOPOISOMERASE_BINDING                                       | -1.38 | 1.02 | 0 | 0 | 0 | not significant |
| 1488 | HESSE_TARGETS_OF_APC_AND_MBD2_DN                                   | -1.38 | 1    | 0 | 0 | 0 | not significant |
| 1489 | GO_CALCIIUM_ION_EXPORT                                             | -1.38 | 0.99 | 0 | 0 | 0 | not significant |
| 1490 | STEIN_ESTROGEN_RESPONSE_NOT_VIA_ESRRA                              | -1.38 | 0.99 | 0 | 0 | 0 | not significant |
| 1491 | GO_ASYMMETRIC_CELL_DIVISION                                        | -1.38 | 0.98 | 0 | 0 | 0 | not significant |
| 1492 | GO_MAINTENANCE_OF_ORGANELLE_LOCATION                               | -1.38 | 0.97 | 0 | 0 | 0 | not significant |
| 1493 | LOPEZ_MESOTHELIOMA_SURVIVAL_DN                                     | -1.38 | 0.97 | 0 | 0 | 0 | not significant |
| 1494 | REACTOME_FRS2_MEDIATED_ACTIVATION                                  | -1.38 | 0.97 | 0 | 0 | 0 | not significant |
| 1495 | TERAO_AOX4_TARGETS_SKIN_DN                                         | -1.38 | 0.97 | 0 | 0 | 0 | not significant |
| 1496 | GO_RESPONSE_TO_SALT                                                | -1.38 | 0.96 | 0 | 0 | 0 | not significant |
| 1497 | REACTOME_G_BETA_GAMMA_SIGNALING_THROUGH_CDC42                      | -1.38 | 0.96 | 0 | 0 | 0 | not significant |
| 1498 | GALLUZZI_PREVENT_MITOCHONDIAL_PERMEABILIZATION                     | -1.38 | 0.95 | 0 | 0 | 0 | not significant |
| 1499 | REACTOME_RECEPTOR_TYPE_TYROSINE_PROTEIN_PHOSPHATASES               | -1.38 | 0.94 | 0 | 0 | 0 | not significant |
| 1500 | REACTOME_TRNA_MODIFICATION_IN_THE_MITOCHONDRION                    | -1.38 | 0.93 | 0 | 0 | 0 | not significant |
| 1501 | GO_EPITHELIAL_CELL_FATE_COMMITMENT                                 | -1.38 | 0.91 | 0 | 0 | 0 | not significant |
| 1502 | GO_DEPYRIMIDINATION                                                | -1.38 | 0.9  | 0 | 0 | 0 | not significant |
| 1503 | GO_PROTEIN_POLYUBIQUITINATION                                      | -1.37 | 4    | 0 | 0 | 0 | not significant |
| 1504 | SPIELMAN_LYMPHOBLAST_EUROPEAN_VS_ASIAN_DN                          | -1.37 | 4    | 0 | 0 | 0 | not significant |
| 1505 | BROWNE_HCMV_INFECTION_16HR_UP                                      | -1.37 | 2.4  | 0 | 0 | 0 | not significant |
| 1506 | REACTOME_SIGNALING_BY_NUCLEAR_RECEPTORS                            | -1.37 | 2.39 | 0 | 0 | 0 | not significant |
| 1507 | WEST_ADRENOCORITICAL_TUMOR_UP                                      | -1.37 | 2.24 | 0 | 0 | 0 | not significant |
| 1508 | REACTOME_EPIGENETIC_REGULATION_OF_GENE_EXPRESSION                  | -1.37 | 2.15 | 0 | 0 | 0 | not significant |
| 1509 | GO_PHOSPHOPROTEIN_PHOSPHATASE_ACTIVITY                             | -1.37 | 1.59 | 0 | 0 | 0 | not significant |
| 1510 | PLUANA_BRCA_CENTERED_NETWORK                                       | -1.37 | 1.43 | 0 | 0 | 0 | not significant |
| 1511 | RAMASWAMY_METASTASIS_UP                                            | -1.37 | 1.3  | 0 | 0 | 0 | not significant |
| 1512 | GO_TRANSCRIPTION_ELONGATION_FACTOR_COMPLEX                         | -1.37 | 1.25 | 0 | 0 | 0 | not significant |
| 1513 | REACTOME_INTERCONVERSION_OF_NUCLEOTIDE_DI_AND_TRIPHOSPHATES        | -1.37 | 1.24 | 0 | 0 | 0 | not significant |
| 1514 | GO_HSP90_PROTEIN_BINDING                                           | -1.37 | 1.21 | 0 | 0 | 0 | not significant |

|      |                                                                    |       |      |   |   |   |                 |
|------|--------------------------------------------------------------------|-------|------|---|---|---|-----------------|
| 1515 | GO_POSITIVE_REGULATION_OF_TELOMERE_MAINTENANCE                     | -1.37 | 1.21 | 0 | 0 | 0 | not significant |
| 1516 | REACTOME_G_ALPHA_Z_SIGNALING_EVENTS                                | -1.37 | 1.13 | 0 | 0 | 0 | not significant |
| 1517 | REACTOME_NEGATIVE_REGULATION_OF_MAPK_PATHWAY                       | -1.37 | 1.1  | 0 | 0 | 0 | not significant |
| 1518 | GO_CLATHRIN_COAT_OF_ENDOCYTTIC_VESICLE                             | -1.37 | 1.03 | 0 | 0 | 0 | not significant |
| 1519 | GO_DENDRITE_CYTOPLASM                                              | -1.37 | 1.03 | 0 | 0 | 0 | not significant |
| 1520 | GO_NUCLEAR_NUCLEOSOME                                              | -1.37 | 1.03 | 0 | 0 | 0 | not significant |
| 1521 | GO_NUCLEAR_STRESS_GRANULE                                          | -1.37 | 1.03 | 0 | 0 | 0 | not significant |
| 1522 | NKOLSKY_BREAST_CANCER_19Q13.1_AMPLICON                             | -1.37 | 1.01 | 0 | 0 | 0 | not significant |
| 1523 | REACTOME_POST_CHAPERONIN_TUBULIN_FOLDING_PATHWAY                   | -1.37 | 1    | 0 | 0 | 0 | not significant |
| 1524 | GO_VITAMIN_D_RECEPTOR_SIGNALING_PATHWAY                            | -1.37 | 0.99 | 0 | 0 | 0 | not significant |
| 1525 | LIU_IL13_MEMORY_MODEL_UP                                           | -1.37 | 0.98 | 0 | 0 | 0 | not significant |
| 1526 | ONGUSAHA_BRCA1_TARGETS_DN                                          | -1.37 | 0.98 | 0 | 0 | 0 | not significant |
| 1527 | CAFFAREL_RESPONSE_TO_THC_8HR_5_DN                                  | -1.37 | 0.97 | 0 | 0 | 0 | not significant |
| 1528 | GO_BONE_GROWTH                                                     | -1.37 | 0.97 | 0 | 0 | 0 | not significant |
| 1529 | GO_INTEGRATOR_COMPLEX                                              | -1.37 | 0.97 | 0 | 0 | 0 | not significant |
| 1530 | GO_MAP_KINASE_KINASE_ACTIVITY                                      | -1.37 | 0.97 | 0 | 0 | 0 | not significant |
| 1531 | GO_RESPONSE_TO_NITRIC_OXIDE                                        | -1.37 | 0.97 | 0 | 0 | 0 | not significant |
| 1532 | TAKEDA_TARGETS_OF_NUP98_HOXA9_FUSION_3D_DN                         | -1.37 | 0.97 | 0 | 0 | 0 | not significant |
| 1533 | GO_7S_RNA_BINDING                                                  | -1.37 | 0.96 | 0 | 0 | 0 | not significant |
| 1534 | GO_RNA_DIRECTED_DNA_POLYMERASE_ACTIVITY                            | -1.37 | 0.96 | 0 | 0 | 0 | not significant |
| 1535 | CONRAD_STEM_CELL                                                   | -1.37 | 0.95 | 0 | 0 | 0 | not significant |
| 1536 | GO_NEGATIVE_REGULATION_OF_INCLUSION_BODY_ASSEMBLY                  | -1.37 | 0.95 | 0 | 0 | 0 | not significant |
| 1537 | GO_RNA_POLYMERASE_II_ACTIVITY                                      | -1.37 | 0.94 | 0 | 0 | 0 | not significant |
| 1538 | NIELSEN_LEIOMYOSARCOMA_CNN1_UP                                     | -1.37 | 0.94 | 0 | 0 | 0 | not significant |
| 1539 | SEIDEN_MET_SIGNALING                                               | -1.37 | 0.94 | 0 | 0 | 0 | not significant |
| 1540 | CHR3P13                                                            | -1.37 | 0.93 | 0 | 0 | 0 | not significant |
| 1541 | GO_POSITIVE_REGULATION_OF_ATTACHMENT_OF_SPINDLE_MICROTUBULES_TO    | -1.37 | 0.92 | 0 | 0 | 0 | not significant |
| 1542 | GO_REGULATION_OF_T_HELPER_2_CELL_DIFFERENTIATION                   | -1.37 | 0.91 | 0 | 0 | 0 | not significant |
| 1543 | GO_POLY_G_BINDING                                                  | -1.37 | 0.87 | 0 | 0 | 0 | not significant |
| 1544 | GO_KINETOCHORE_ASSEMBLY                                            | -1.37 | 0.86 | 0 | 0 | 0 | not significant |
| 1545 | ENK_UV_RESPONSE_KERATINOCYTE_DN                                    | -1.36 | 4    | 0 | 0 | 0 | not significant |
| 1546 | GO_CHROMOSOME                                                      | -1.36 | 4    | 0 | 0 | 0 | not significant |
| 1547 | GO_DEPHOSPHORYLATION                                               | -1.36 | 4    | 0 | 0 | 0 | not significant |
| 1548 | GO_ESTABLISHMENT_OF_ORGANELLE_LOCALIZATION                         | -1.36 | 4    | 0 | 0 | 0 | not significant |
| 1549 | GO_GENERATION_OF_PRECURSOR_METABOLITES_AND_ENERGY                  | -1.36 | 4    | 0 | 0 | 0 | not significant |
| 1550 | GO_MODIFICATION_DEPENDENT_MACROMOLECULE_CATABOLIC_PROCESS          | -1.36 | 4    | 0 | 0 | 0 | not significant |
| 1551 | GO_NUCLEAR_BODY                                                    | -1.36 | 4    | 0 | 0 | 0 | not significant |
| 1552 | REACTOME_ORGANELLE_BIOGENESIS_AND_MAINTENANCE                      | -1.36 | 4    | 0 | 0 | 0 | not significant |
| 1553 | REACTOME_SIGNALING_BY_NOTCH                                        | -1.36 | 2.37 | 0 | 0 | 0 | not significant |
| 1554 | REACTOME_OTHER_INTERLEUKIN_SIGNALING                               | -1.36 | 2.32 | 0 | 0 | 0 | not significant |
| 1555 | GO_PROTEIN_CONTAINING_COMPLEX_DISASSEMBLY                          | -1.36 | 1.93 | 0 | 0 | 0 | not significant |
| 1556 | REACTOME_G2_M_CHECKPOINTS                                          | -1.36 | 1.74 | 0 | 0 | 0 | not significant |
| 1557 | PURBEY_TARGETS_OF_CTB1_AND_SATB1_DN                                | -1.36 | 1.65 | 0 | 0 | 0 | not significant |
| 1558 | GO_N_ACETYLTRANSFERASE_ACTIVITY                                    | -1.36 | 1.51 | 0 | 0 | 0 | not significant |
| 1559 | REACTOME_AURKA_ACTIVATION_BY_TPX2                                  | -1.36 | 1.48 | 0 | 0 | 0 | not significant |
| 1560 | SENESE_HDAC2_TARGETS_UP                                            | -1.36 | 1.47 | 0 | 0 | 0 | not significant |
| 1561 | GO_LAMELLIPODIUM_ORGANIZATION                                      | -1.36 | 1.42 | 0 | 0 | 0 | not significant |
| 1562 | GO_MITOCHONDRIAL_TRANSMEMBRANE_TRANSPORT                           | -1.36 | 1.38 | 0 | 0 | 0 | not significant |
| 1563 | GO_P53_BINDING                                                     | -1.36 | 1.31 | 0 | 0 | 0 | not significant |
| 1564 | GO_NEGATIVE_REGULATION_OF_RNA_CATABOLIC_PROCESS                    | -1.36 | 1.3  | 0 | 0 | 0 | not significant |
| 1565 | ZHAN_MULTIPLE_MYELOMA_CD2_DN                                       | -1.36 | 1.27 | 0 | 0 | 0 | not significant |
| 1566 | REACTOME_TRANSCRIPTIONAL_REGULATION_BY_MECP2                       | -1.36 | 1.26 | 0 | 0 | 0 | not significant |
| 1567 | REACTOME_RNA_POLYMERASE_I_TRANSCRIPTION_TERMINATION                | -1.36 | 1.15 | 0 | 0 | 0 | not significant |
| 1568 | PID_P13K1_AKT_PATHWAY                                              | -1.36 | 1.13 | 0 | 0 | 0 | not significant |
| 1569 | GO_POSITIVE_REGULATION_OF_PROTEIN_COMPLEX_DISASSEMBLY              | -1.36 | 1.03 | 0 | 0 | 0 | not significant |
| 1570 | GO_HETEROTRIMERIC_G_PROTEIN_COMPLEX                                | -1.36 | 1.02 | 0 | 0 | 0 | not significant |
| 1571 | GO_CENTRAL_NERVOUS_SYSTEM_NEURON_AXONOGENESIS                      | -1.36 | 1.01 | 0 | 0 | 0 | not significant |
| 1572 | REACTOME_ACTIVATION_OF_RAS_IN_B_CELLS                              | -1.36 | 1    | 0 | 0 | 0 | not significant |
| 1573 | GO_EUKARYOTIC_TRANSLATION_INITIATION_FACTOR_3_COMPLEX_EIF3M        | -1.36 | 0.99 | 0 | 0 | 0 | not significant |
| 1574 | GO_TROPHECTODERMAL_CELL_DIFFERENTIATION                            | -1.36 | 0.99 | 0 | 0 | 0 | not significant |
| 1575 | CAIRO_PML_TARGETS_BOUND_BY_MYC_UP                                  | -1.36 | 0.98 | 0 | 0 | 0 | not significant |
| 1576 | GO_SCHMIDT_LANTERMAN_INCISURE                                      | -1.36 | 0.98 | 0 | 0 | 0 | not significant |
| 1577 | REACTOME_EGFR_TRANSACTIVATION_BY_GASTRIN                           | -1.36 | 0.96 | 0 | 0 | 0 | not significant |
| 1578 | GO_RNA_POLYMERASE_II_CORE_COMPLEX                                  | -1.36 | 0.95 | 0 | 0 | 0 | not significant |
| 1579 | LEE_METASTASIS_AND_RNA_PROCESSING_UP                               | -1.36 | 0.94 | 0 | 0 | 0 | not significant |
| 1580 | REACTOME_PP2A_MEDIATED_DEPHOSPHORYLATION_OF_KEY_METABOLIC_FACTO    | -1.36 | 0.94 | 0 | 0 | 0 | not significant |
| 1581 | ZERBINI_RESPONSE_TO_SULINDAC_DN                                    | -1.36 | 0.94 | 0 | 0 | 0 | not significant |
| 1582 | HONRADO_BREAST_CANCER_BRCA1_VS_BRCA2                               | -1.36 | 0.93 | 0 | 0 | 0 | not significant |
| 1583 | GO_MINUS_END_DIRECTED_ORGANELLE_TRANSPORT_ALONG_MICROTUBULE        | -1.36 | 0.92 | 0 | 0 | 0 | not significant |
| 1584 | GO_PYRIMIDINE_NUCLEOBASE_BIOSYNTHETIC_PROCESS                      | -1.36 | 0.92 | 0 | 0 | 0 | not significant |
| 1585 | PYEON_CANCER_HEAD_AND_NECK_VS_CERVICAL_DN                          | -1.36 | 0.92 | 0 | 0 | 0 | not significant |
| 1586 | GO_BETA_CATENIN_DESTRUCTION_COMPLEX_ASSEMBLY                       | -1.36 | 0.91 | 0 | 0 | 0 | not significant |
| 1587 | GO_RESPONSE_TO_INSECTICIDE                                         | -1.36 | 0.9  | 0 | 0 | 0 | not significant |
| 1588 | REACTOME_JOSEPHIN_DOMAIN_DUBS                                      | -1.36 | 0.9  | 0 | 0 | 0 | not significant |
| 1589 | GO_REGULATION_OF_HIPPO_SIGNALING                                   | -1.36 | 0.87 | 0 | 0 | 0 | not significant |
| 1590 | GO_POSITIVE_REGULATION_OF_RNA_POLYMERASE_II_TRANSCRIPTIONAL_PREINT | -1.36 | 0.84 | 0 | 0 | 0 | not significant |
| 1591 | REACTOME_METHYLATION                                               | -1.36 | 0.81 | 0 | 0 | 0 | not significant |
| 1592 | GO_PROTEIN_CONTAINING_COMPLEX_ASSEMBLY                             | -1.35 | 4    | 0 | 0 | 0 | not significant |
| 1593 | GO_ANTIGEN_PROCESSING_AND_PRESENTATION                             | -1.35 | 1.88 | 0 | 0 | 0 | not significant |
| 1594 | GO_POSITIVE_REGULATION_OF_NUCLEOBASE_CONTAINING_COMPOUND_METABO    | -1.35 | 1.75 | 0 | 0 | 0 | not significant |
| 1595 | GO_REGULATION_OF_UBIQUITIN_DEPENDENT_PROTEIN_CATABOLIC_PROCESS     | -1.35 | 1.68 | 0 | 0 | 0 | not significant |
| 1596 | GO_PROTEIN_STABILIZATION                                           | -1.35 | 1.66 | 0 | 0 | 0 | not significant |
| 1597 | YANG_BCL3_TARGETS_UP                                               | -1.35 | 1.65 | 0 | 0 | 0 | not significant |
| 1598 | ZHENG_GLIOMASTOMA_PLASTICITY_UP                                    | -1.35 | 1.61 | 0 | 0 | 0 | not significant |
| 1599 | GO_RESPIRATORY_ELECTRON_TRANSPORT_CHAIN                            | -1.35 | 1.57 | 0 | 0 | 0 | not significant |
| 1600 | GO_ANTERIOR_POSTERIOR_PATTERN_SPECIFICATION                        | -1.35 | 1.46 | 0 | 0 | 0 | not significant |
| 1601 | CHR22Q12                                                           | -1.35 | 1.41 | 0 | 0 | 0 | not significant |
| 1602 | GO_FC_EPSILON_RECEPTOR_SIGNALING_PATHWAY                           | -1.35 | 1.4  | 0 | 0 | 0 | not significant |
| 1603 | MORI_MATURE_B_LYMPHOCYTE_DN                                        | -1.35 | 1.33 | 0 | 0 | 0 | not significant |
| 1604 | REACTOME_ASSEMBLY_OF_THE_PRE_REPLICATIVE_COMPLEX                   | -1.35 | 1.29 | 0 | 0 | 0 | not significant |
| 1605 | GAZDA_DIAMOND_BLACKFAN_ANEMIA_MYELOID_DN                           | -1.35 | 1.28 | 0 | 0 | 0 | not significant |
| 1606 | GO_PEPTIDE_N_ACETYLTRANSFERASE_ACTIVITY                            | -1.35 | 1.24 | 0 | 0 | 0 | not significant |
| 1607 | GO_REGULATION_OF_CARBOHYDRATE_CATABOLIC_PROCESS                    | -1.35 | 1.24 | 0 | 0 | 0 | not significant |
| 1608 | GO_TRANSCRIPTION_FACTOR_TFIID_COMPLEX                              | -1.35 | 1.13 | 0 | 0 | 0 | not significant |
| 1609 | THILLAINADESAN_ZNF217_TARGETS_UP                                   | -1.35 | 1.08 | 0 | 0 | 0 | not significant |
| 1610 | OLSSON_E2F3_TARGETS_DN                                             | -1.35 | 1.07 | 0 | 0 | 0 | not significant |
| 1611 | GO_POSITIVE_REGULATION_OF_CHROMOSOME_SEGREGATION                   | -1.35 | 1.06 | 0 | 0 | 0 | not significant |
| 1612 | REACTOME_PYRUVATE_METABOLISM                                       | -1.35 | 1.06 | 0 | 0 | 0 | not significant |
| 1613 | CHR10Q21                                                           | -1.35 | 1.05 | 0 | 0 | 0 | not significant |
| 1614 | GO_NUCLEAR_TRANSCRIPTIONAL_REPRESSOR_COMPLEX                       | -1.35 | 1.05 | 0 | 0 | 0 | not significant |
| 1615 | GRADE_COLON_VS_RECTAL_CANCER_DN                                    | -1.35 | 1.02 | 0 | 0 | 0 | not significant |
| 1616 | GO_POSITIVE_REGULATION_OF_DNA_TEMPLATED_TRANSCRIPTION_ELONGATION   | -1.35 | 1    | 0 | 0 | 0 | not significant |
| 1617 | GO_ANNULATE_LAMELLAE                                               | -1.35 | 0.97 | 0 | 0 | 0 | not significant |
| 1618 | GO_REGULATION_OF_ANOKIS                                            | -1.35 | 0.97 | 0 | 0 | 0 | not significant |
| 1619 | GO_POSITIVE_REGULATION_OF_GLIAL_CELL_DIFFERENTIATION               | -1.35 | 0.96 | 0 | 0 | 0 | not significant |
| 1620 | PETRETTO_HEART_MASS_QTL_CIS_UP                                     | -1.35 | 0.96 | 0 | 0 | 0 | not significant |
| 1621 | GO_PROTEIN_FOLDING_IN_ENDOPLASMIC_RETICULUM                        | -1.35 | 0.95 | 0 | 0 | 0 | not significant |
| 1622 | BIOCARTA_MPR_PATHWAY                                               | -1.35 | 0.93 | 0 | 0 | 0 | not significant |
| 1623 | GO_GEMINI_OF_COILED_BODIES                                         | -1.35 | 0.93 | 0 | 0 | 0 | not significant |

|      |                                                                     |       |      |   |   |   |                 |
|------|---------------------------------------------------------------------|-------|------|---|---|---|-----------------|
| 1624 | GO_MICROTUBULE_ORGANIZING_CENTER_LOCALIZATION                       | -1.35 | 0.93 | 0 | 0 | 0 | not significant |
| 1625 | GO_NUCLEOBASE_BIOSYNTHETIC_PROCESS                                  | -1.35 | 0.93 | 0 | 0 | 0 | not significant |
| 1626 | MARSON_FOXP3_TARGETS_STIMULATED_DN                                  | -1.35 | 0.91 | 0 | 0 | 0 | not significant |
| 1627 | REACTOME_REGULATION_OF_FOXP3_TRANSCRIPTIONAL_ACTIVITY_BY_ACETYLATED | -1.35 | 0.91 | 0 | 0 | 0 | not significant |
| 1628 | GO_PROTEIN_ARGININE_N_METHYLTRANSFERASE_ACTIVITY                    | -1.35 | 0.89 | 0 | 0 | 0 | not significant |
| 1629 | GO_SYNAPTIC_VESICLE_BUDDING                                         | -1.35 | 0.89 | 0 | 0 | 0 | not significant |
| 1630 | GO_TRNA_WOBBLE_URIDINE_MODIFICATION                                 | -1.35 | 0.89 | 0 | 0 | 0 | not significant |
| 1631 | VALK_AML_CLUSTER_6                                                  | -1.35 | 0.89 | 0 | 0 | 0 | not significant |
| 1632 | GO_CALCIIUM_DEPENDENT_PROTEIN_KINASE_ACTIVITY                       | -1.35 | 0.87 | 0 | 0 | 0 | not significant |
| 1633 | GO_DEPHOSPHORYLATION_OF_RNA_POLYMERASE_II_C_TERMINAL_DOMAIN         | -1.35 | 0.87 | 0 | 0 | 0 | not significant |
| 1634 | GARGALOVIC_RESPONSE_TO_OXIDIZED_PHOSPHOLIPIDS_SALMON_DN             | -1.35 | 0.85 | 0 | 0 | 0 | not significant |
| 1635 | REACTOME_TRANSPORT_OF_CONNEXONS_TO_THE_PLASMA_MEMBRANE              | -1.35 | 0.84 | 0 | 0 | 0 | not significant |
| 1636 | GO_NLRP3_INFLAMMASOME_COMPLEX_ASSEMBLY                              | -1.35 | 0.83 | 0 | 0 | 0 | not significant |
| 1637 | GO_MORPHOGENESIS_OF_AN_EPITHELIUM                                   | -1.34 | 4    | 0 | 0 | 0 | not significant |
| 1638 | GO_DNA_CONFORMATION_CHANGE                                          | -1.34 | 2.33 | 0 | 0 | 0 | not significant |
| 1639 | GOLDRATH_ANTIGEN_RESPONSE                                           | -1.34 | 2.26 | 0 | 0 | 0 | not significant |
| 1640 | GO_ATPASE_ACTIVITY                                                  | -1.34 | 2.24 | 0 | 0 | 0 | not significant |
| 1641 | REACTOME_PTEN_REGULATION                                            | -1.34 | 1.67 | 0 | 0 | 0 | not significant |
| 1642 | GO_REGULATION_OF_PHOSPHATASE_ACTIVITY                               | -1.34 | 1.6  | 0 | 0 | 0 | not significant |
| 1643 | IVANAGA_CARCIINOGENESIS_BY_KRAS_PTEN_UP                             | -1.34 | 1.41 | 0 | 0 | 0 | not significant |
| 1644 | GO_ANTIGEN_PROCESSING_AND_PRESENTATION_OF_PEPTIDE_ANTIGEN_VIA_MHC   | -1.34 | 1.33 | 0 | 0 | 0 | not significant |
| 1645 | GO_HISTONE_EXCHANGE                                                 | -1.34 | 1.23 | 0 | 0 | 0 | not significant |
| 1646 | GO_CARDIOCYTE_DIFFERENTIATION                                       | -1.34 | 1.22 | 0 | 0 | 0 | not significant |
| 1647 | MIDORIKAWA_AMPLIFIED_IN_LIVER_CANCER                                | -1.34 | 1.15 | 0 | 0 | 0 | not significant |
| 1648 | HALLMARK_SPERMATOGENESIS                                            | -1.34 | 1.12 | 0 | 0 | 0 | not significant |
| 1649 | APRELKOVA_BRCA1_TARGETS                                             | -1.34 | 1.1  | 0 | 0 | 0 | not significant |
| 1650 | GO_TORC2_SIGNALING                                                  | -1.34 | 1.06 | 0 | 0 | 0 | not significant |
| 1651 | TONG_INTERACT_WITH_PTTG1                                            | -1.34 | 1.02 | 0 | 0 | 0 | not significant |
| 1652 | CHR5P15                                                             | -1.34 | 1    | 0 | 0 | 0 | not significant |
| 1653 | GO_MOVEMENT_IN_ENVIRONMENT_OF_OTHER_ORGANISM_INVOLVED_IN_SYMBIOT    | -1.34 | 1    | 0 | 0 | 0 | not significant |
| 1654 | GO TRABECULA MORPHOGENESIS                                          | -1.34 | 0.97 | 0 | 0 | 0 | not significant |
| 1655 | GO_GLOMERULUS_DEVELOPMENT                                           | -1.34 | 0.96 | 0 | 0 | 0 | not significant |
| 1656 | GO_NEGATIVE_REGULATION_OF_CELL_AGING                                | -1.34 | 0.95 | 0 | 0 | 0 | not significant |
| 1657 | GO_REGULATION_OF_MALE_GONAD_DEVELOPMENT                             | -1.34 | 0.95 | 0 | 0 | 0 | not significant |
| 1658 | REACTOME_SIGNALING_BY_EGFR_IN_CANCER                                | -1.34 | 0.95 | 0 | 0 | 0 | not significant |
| 1659 | GO_REGULATION_OF_SPINDLE_ASSEMBLY                                   | -1.34 | 0.94 | 0 | 0 | 0 | not significant |
| 1660 | GO_PORE_COMPLEX                                                     | -1.34 | 0.93 | 0 | 0 | 0 | not significant |
| 1661 | GO_POSITIVE_REGULATION_OF_BONE_RESORPTION                           | -1.34 | 0.93 | 0 | 0 | 0 | not significant |
| 1662 | GO_SUMO_BINDING                                                     | -1.34 | 0.93 | 0 | 0 | 0 | not significant |
| 1663 | GO_LEUCINE_CATABOLIC_PROCESS                                        | -1.34 | 0.92 | 0 | 0 | 0 | not significant |
| 1664 | REACTOME_ADP_SIGNALING_THROUGH_P2Y_PURINOCEPTOR_12                  | -1.34 | 0.91 | 0 | 0 | 0 | not significant |
| 1665 | GO_VITAMIN_TRANSPORT                                                | -1.34 | 0.9  | 0 | 0 | 0 | not significant |
| 1666 | GRAHAM_CML_QUIESCENT_VS_CML_DIVIDING_UP                             | -1.34 | 0.87 | 0 | 0 | 0 | not significant |
| 1667 | GO_AMP_METABOLIC_PROCESS                                            | -1.34 | 0.86 | 0 | 0 | 0 | not significant |
| 1668 | GO_RESPONSE_TO_OXYGEN_GLUCOSE_DEPRIVATION                           | -1.34 | 0.86 | 0 | 0 | 0 | not significant |
| 1669 | BIOCARTA_AGPCR_PATHWAY                                              | -1.34 | 0.85 | 0 | 0 | 0 | not significant |
| 1670 | GO_NEGATIVE_REGULATION_OF_HOMOTYPIC_CELL_CELL_ADHESION              | -1.34 | 0.85 | 0 | 0 | 0 | not significant |
| 1671 | GO_DENDRITE_TERMINUS                                                | -1.34 | 0.84 | 0 | 0 | 0 | not significant |
| 1672 | GO_STAGA_COMPLEX                                                    | -1.34 | 0.84 | 0 | 0 | 0 | not significant |
| 1673 | GO_TRANSLATION_TERMINATION_FACTOR_ACTIVITY                          | -1.34 | 0.82 | 0 | 0 | 0 | not significant |
| 1674 | GO_REGULATION_OF_INTRACELLULAR_LIPID_TRANSPORT                      | -1.34 | 0.81 | 0 | 0 | 0 | not significant |
| 1675 | GO_CELLULAR_COMPONENT_DISASSEMBLY                                   | -1.33 | 4    | 0 | 0 | 0 | not significant |
| 1676 | GO_PROTEIN_SERINE_THREONINE_KINASE_ACTIVITY                         | -1.33 | 4    | 0 | 0 | 0 | not significant |
| 1677 | GO_POSITIVE_REGULATION_OF_MULTIORGANISM_PROCESS                     | -1.33 | 1.75 | 0 | 0 | 0 | not significant |
| 1678 | ERBB2_UP_V1_DN                                                      | -1.33 | 1.71 | 0 | 0 | 0 | not significant |
| 1679 | AFFAR_YY1_TARGETS_DN                                                | -1.33 | 1.61 | 0 | 0 | 0 | not significant |
| 1680 | GO_NEGATIVE_REGULATION_OF_NEURON_DIFFERENTIATION                    | -1.33 | 1.58 | 0 | 0 | 0 | not significant |
| 1681 | REACTOME_INTERLEUKIN_1_FAMILY_SIGNALING                             | -1.33 | 1.38 | 0 | 0 | 0 | not significant |
| 1682 | GO_FEMALE_GAMETE_GENERATION                                         | -1.33 | 1.36 | 0 | 0 | 0 | not significant |
| 1683 | DE_YY1_TARGETS_DN                                                   | -1.33 | 1.34 | 0 | 0 | 0 | not significant |
| 1684 | KEGG_GLYCOLYSIS_GLUconeogenesis                                     | -1.33 | 1.11 | 0 | 0 | 0 | not significant |
| 1685 | GO_RNA_STABILIZATION                                                | -1.33 | 1.06 | 0 | 0 | 0 | not significant |
| 1686 | GO_RNA_POLYMERASE_CORE_ENZYME_BINDING                               | -1.33 | 1.04 | 0 | 0 | 0 | not significant |
| 1687 | BOHN_PRIMARY_IMMUNODEFICIENCY_SYNDROM_UP                            | -1.33 | 1.01 | 0 | 0 | 0 | not significant |
| 1688 | GO_ACTIVATION_OF_MAPKK_ACTIVITY                                     | -1.33 | 1.01 | 0 | 0 | 0 | not significant |
| 1689 | REACTOME_SIGNALING_BY_MODERATE_KINASE_ACTIVITY_BRAF_MUTANTS         | -1.33 | 1    | 0 | 0 | 0 | not significant |
| 1690 | IZUKA_LIVER_CANCER_PROGRESSION_G1_G2_DN                             | -1.33 | 0.97 | 0 | 0 | 0 | not significant |
| 1691 | VARELA_ZMPSTE24_TARGETS_UP                                          | -1.33 | 0.97 | 0 | 0 | 0 | not significant |
| 1692 | GO_TELOMERASE_ACTIVITY                                              | -1.33 | 0.96 | 0 | 0 | 0 | not significant |
| 1693 | BARIS_THYROID_CANCER_UP                                             | -1.33 | 0.95 | 0 | 0 | 0 | not significant |
| 1694 | GO_REGULATION_OF_RESPIRATORY_GASEOUS_EXCHANGE_BY_NEUROLOGICAL_      | -1.33 | 0.95 | 0 | 0 | 0 | not significant |
| 1695 | GO_MODULATION_OF_TRANSCRIPTION_IN_OTHER_ORGANISM_INVOLVED_IN_SYME   | -1.33 | 0.94 | 0 | 0 | 0 | not significant |
| 1696 | GO_POTASSIUM_CHANNEL_REGULATOR_ACTIVITY                             | -1.33 | 0.94 | 0 | 0 | 0 | not significant |
| 1697 | GO_TRNA_WOBBLE_BASE_MODIFICATION                                    | -1.33 | 0.94 | 0 | 0 | 0 | not significant |
| 1698 | GO_NUCLEOSIDE_DIPHOSPHATE_METABOLIC_PROCESS                         | -1.33 | 0.93 | 0 | 0 | 0 | not significant |
| 1699 | GO_POSITIVE_REGULATION_OF_HEART_GROWTH                              | -1.33 | 0.93 | 0 | 0 | 0 | not significant |
| 1700 | KIM_MYCL1_AMPLIFICATION_TARGETS_DN                                  | -1.33 | 0.91 | 0 | 0 | 0 | not significant |
| 1701 | GO_HOST_CELL_PART                                                   | -1.33 | 0.88 | 0 | 0 | 0 | not significant |
| 1702 | GO_PEPTIDYL_ARGININE_N_METHYLATION                                  | -1.33 | 0.87 | 0 | 0 | 0 | not significant |
| 1703 | GO_TRANSCRIPTIONALLY_ACTIVE_CHROMATIN                               | -1.33 | 0.87 | 0 | 0 | 0 | not significant |
| 1704 | GO_CHROMATIN_SILENCING_COMPLEX                                      | -1.33 | 0.86 | 0 | 0 | 0 | not significant |
| 1705 | GO_LARGE_RIBOSOMAL_SUBUNIT_RRNA_BINDING                             | -1.33 | 0.86 | 0 | 0 | 0 | not significant |
| 1706 | GO_NEUROBLAST_DIVISION                                              | -1.33 | 0.86 | 0 | 0 | 0 | not significant |
| 1707 | GO_REGULATION_OF_PLASMINOGEN_ACTIVATION                             | -1.33 | 0.86 | 0 | 0 | 0 | not significant |
| 1708 | GO_RNA_INTERFERENCE                                                 | -1.33 | 0.86 | 0 | 0 | 0 | not significant |
| 1709 | REACTOME_MAP3K8_TPL2_DEPENDENT_MAPK1_3_ACTIVATION                   | -1.33 | 0.86 | 0 | 0 | 0 | not significant |
| 1710 | REACTOME_RUNX1_REGULATES_ESTROGEN_RECEPTOR_MEDIATED_TRANSCRIPT      | -1.33 | 0.86 | 0 | 0 | 0 | not significant |
| 1711 | GO_ESTABLISHMENT_OR_MAINTENANCE_OF_CYTOSKELETON_POLARITY            | -1.33 | 0.85 | 0 | 0 | 0 | not significant |
| 1712 | GO_CEREBELLAR_PURKINJE_CELL_LAYER_DEVELOPMENT                       | -1.33 | 0.84 | 0 | 0 | 0 | not significant |
| 1713 | GO_NEGATIVE_REGULATION_OF_EXCITATORY_POSTSYNAPTIC_POTENTIAL         | -1.33 | 0.84 | 0 | 0 | 0 | not significant |
| 1714 | GO_SIGNAL_RECOGNITION_PARTICLE_ENDOPLASMIC_RETICULUM_TARGETING      | -1.33 | 0.84 | 0 | 0 | 0 | not significant |
| 1715 | REACTOME_SIGNALING_BY_LIGAND_RESPONSIVE_EGFR_VARIANTS_IN_CANCER     | -1.33 | 0.84 | 0 | 0 | 0 | not significant |
| 1716 | GO_GERM_CELL_NUCLEUS                                                | -1.33 | 0.83 | 0 | 0 | 0 | not significant |
| 1717 | GO_POSITIVE_REGULATION_OF_CIRCADIAN_RHYTHM                          | -1.33 | 0.83 | 0 | 0 | 0 | not significant |
| 1718 | REACTOME_GAP_JUNCTION_ASSEMBLY                                      | -1.33 | 0.82 | 0 | 0 | 0 | not significant |
| 1719 | GO_DOUBLE_STRANDED_TELOMERIC_DNA_BINDING                            | -1.33 | 0.81 | 0 | 0 | 0 | not significant |
| 1720 | GO_NERVE_GROWTH_FACTOR_SIGNALING_PATHWAY                            | -1.33 | 0.8  | 0 | 0 | 0 | not significant |
| 1721 | REACTOME_SHC_MEDIATED_CASCADE_FGFR1                                 | -1.33 | 0.79 | 0 | 0 | 0 | not significant |
| 1722 | CHR13Q22                                                            | -1.33 | 0.78 | 0 | 0 | 0 | not significant |
| 1723 | REACTOME_REGULATION_OF_CYTOSKELETAL_REMODELING_AND_CELL_SPREAD      | -1.33 | 0.77 | 0 | 0 | 0 | not significant |
| 1724 | GO_MORPHOGENESIS_OF_AN_EPITHELIAL_FOLD                              | -1.33 | 0.75 | 0 | 0 | 0 | not significant |
| 1725 | REACTOME_MET_ACTIVATES_RAS_SIGNALING                                | -1.33 | 0.75 | 0 | 0 | 0 | not significant |
| 1726 | GO_CELL_ADHESION_MOLECULE_BINDING                                   | -1.32 | 4    | 0 | 0 | 0 | not significant |
| 1727 | GO_MICROTUBULE_CYTOSKELETON                                         | -1.32 | 4    | 0 | 0 | 0 | not significant |
| 1728 | GO_ORGANIC_CYCLIC_COMPOUND_CATABOLIC_PROCESS                        | -1.32 | 4    | 0 | 0 | 0 | not significant |
| 1729 | LINSLEY_MIR16_TARGETS                                               | -1.32 | 2.09 | 0 | 0 | 0 | not significant |
| 1730 | REACTOME_SIGNALING_BY_ROBO_RECEPTORS                                | -1.32 | 1.98 | 0 | 0 | 0 | not significant |
| 1731 | GO_GOLGI_VESICLE_TRANSPORT                                          | -1.32 | 1.92 | 0 | 0 | 0 | not significant |
| 1732 | GO_CELLULAR_AMINO_ACID_METABOLIC_PROCESS                            | -1.32 | 1.89 | 0 | 0 | 0 | not significant |

|      |                                                                   |       |      |   |   |   |                 |
|------|-------------------------------------------------------------------|-------|------|---|---|---|-----------------|
| 1733 | GO_PROTEIN_DNA_COMPLEX_SUBUNIT_ORGANIZATION                       | -1.32 | 1.85 | 0 | 0 | 0 | not significant |
| 1734 | MARTORIATI_MDM4_TARGETS_NEUROEPITHELIUM_UP                        | -1.32 | 1.74 | 0 | 0 | 0 | not significant |
| 1735 | PUIANA_BREAST_CANCER_LIT_INT_NETWORK                              | -1.32 | 1.4  | 0 | 0 | 0 | not significant |
| 1736 | GO_NEGATIVE_REGULATION_OF_WNT_SIGNALING_PATHWAY                   | -1.32 | 1.36 | 0 | 0 | 0 | not significant |
| 1737 | GO_REGULATION_OF_PROTEIN_LOCALIZATION_TO_CELL_PERIPHERY           | -1.32 | 1.36 | 0 | 0 | 0 | not significant |
| 1738 | DARWICHE_PAPILLOMA_RISK_LOW_UP                                    | -1.32 | 1.3  | 0 | 0 | 0 | not significant |
| 1739 | GO_CEREBRAL_CORTEX_DEVELOPMENT                                    | -1.32 | 1.22 | 0 | 0 | 0 | not significant |
| 1740 | GO_PEPTIDYL_TYROSINE_DEPHOSPHORYLATION                            | -1.32 | 1.21 | 0 | 0 | 0 | not significant |
| 1741 | BILD_CTNNB1_ONCOGENIC_SIGNATURE                                   | -1.32 | 1.2  | 0 | 0 | 0 | not significant |
| 1742 | GO_TRANSCRIPTIONAL_REPRESSOR_COMPLEX                              | -1.32 | 1.18 | 0 | 0 | 0 | not significant |
| 1743 | PEART_HDAC_PROLIFERATION_CLUSTER_DN                               | -1.32 | 1.16 | 0 | 0 | 0 | not significant |
| 1744 | DAIRKEE_TERT_TARGETS_DN                                           | -1.32 | 1.14 | 0 | 0 | 0 | not significant |
| 1745 | AMIT_SERUM_RESPONSE_120_MCF10A                                    | -1.32 | 1.12 | 0 | 0 | 0 | not significant |
| 1746 | CHR5Q13                                                           | -1.32 | 1.07 | 0 | 0 | 0 | not significant |
| 1747 | GO_MULTI_ORGANISM_BEHAVIOR                                        | -1.32 | 1.02 | 0 | 0 | 0 | not significant |
| 1748 | REACTOME_NEGATIVE_REGULATION_OF_FGFR4_SIGNALING                   | -1.32 | 0.94 | 0 | 0 | 0 | not significant |
| 1749 | CHR16Q21                                                          | -1.32 | 0.93 | 0 | 0 | 0 | not significant |
| 1750 | REACTOME_NEGATIVE_REGULATION_OF_FGFR1_SIGNALING                   | -1.32 | 0.93 | 0 | 0 | 0 | not significant |
| 1751 | CHR6P24                                                           | -1.32 | 0.92 | 0 | 0 | 0 | not significant |
| 1752 | GO_RIBONUCLEOPROTEIN_COMPLEX_DISASSEMBLY                          | -1.32 | 0.91 | 0 | 0 | 0 | not significant |
| 1753 | REACTOME_GAP_JUNCTION_TRAFFICKING_AND_REGULATION                  | -1.32 | 0.91 | 0 | 0 | 0 | not significant |
| 1754 | GO_POSITIVE_REGULATION_OF_RNA_SPLICING                            | -1.32 | 0.9  | 0 | 0 | 0 | not significant |
| 1755 | GO_GROWTH_PLATE_CARTILAGE_DEVELOPMENT                             | -1.32 | 0.89 | 0 | 0 | 0 | not significant |
| 1756 | GO_MRNA_TRANSCRIPTION                                             | -1.32 | 0.88 | 0 | 0 | 0 | not significant |
| 1757 | REACTOME_RHO_GTPASES_ACTIVATE_IQGAPS                              | -1.32 | 0.88 | 0 | 0 | 0 | not significant |
| 1758 | GO_ESTABLISHMENT_OF_PROTEIN_LOCALIZATION_TO_CHROMATIN             | -1.32 | 0.87 | 0 | 0 | 0 | not significant |
| 1759 | GO_MODULATION_OF_EXCITATORY_POSTSYNAPTIC_POTENTIAL                | -1.32 | 0.87 | 0 | 0 | 0 | not significant |
| 1760 | GO_POSITIVE_REGULATION_OF_DENDRITIC_CELL_CYTOKINE_PRODUCTION      | -1.32 | 0.86 | 0 | 0 | 0 | not significant |
| 1761 | GO_CATALYTIC_ACTIVITY_ACTING_ON_A_RRNA                            | -1.32 | 0.85 | 0 | 0 | 0 | not significant |
| 1762 | GO_POSITIVE_REGULATION_OF_MYELOID_LEUKOCYTE_CYTOKINE_PRODUCTION_I | -1.32 | 0.85 | 0 | 0 | 0 | not significant |
| 1763 | GO_PROTEIN_K6_LINKED_UBIQUITINATION                               | -1.32 | 0.85 | 0 | 0 | 0 | not significant |
| 1764 | REACTOME_NEGATIVE_REGULATION_OF_FGFR2_SIGNALING                   | -1.32 | 0.85 | 0 | 0 | 0 | not significant |
| 1765 | GO_AT_DNA_BINDING                                                 | -1.32 | 0.84 | 0 | 0 | 0 | not significant |
| 1766 | SEMENZA_HIF1_TARGETS                                              | -1.32 | 0.84 | 0 | 0 | 0 | not significant |
| 1767 | GO_MITOCHONDRIAL_TRNA_METHYLATION                                 | -1.32 | 0.82 | 0 | 0 | 0 | not significant |
| 1768 | GO_G_PROTEIN_COUPLED_Glutamate_RECEPTOR_BINDING                   | -1.32 | 0.81 | 0 | 0 | 0 | not significant |
| 1769 | SEMBA_FHIT_TARGETS_DN                                             | -1.32 | 0.81 | 0 | 0 | 0 | not significant |
| 1770 | GO_REGULATION_OF_MITOTIC_CENTROSOME_SEPARATION                    | -1.32 | 0.8  | 0 | 0 | 0 | not significant |
| 1771 | GO_EUKARYOTIC_TRANSLATION_INITIATION_FACTOR_4F_COMPLEX            | -1.32 | 0.78 | 0 | 0 | 0 | not significant |
| 1772 | REACTOME_SHC1_EVENTS_IN_ERBB4_SIGNALING                           | -1.32 | 0.78 | 0 | 0 | 0 | not significant |
| 1773 | GO_MUSCLE_ATROPHY                                                 | -1.32 | 0.76 | 0 | 0 | 0 | not significant |
| 1774 | GO_NUCLEOLAR_RIBONUCLEASE_P_COMPLEX                               | -1.32 | 0.76 | 0 | 0 | 0 | not significant |
| 1775 | GO_POSITIVE_REGULATION_OF_B_CELL_RECEPTOR_SIGNALING_PATHWAY       | -1.32 | 0.74 | 0 | 0 | 0 | not significant |
| 1776 | GO_PROTEIN_CONTAINING_COMPLEX_BINDING                             | -1.31 | 4    | 0 | 0 | 0 | not significant |
| 1777 | GO_PROTEIN_DOMAIN_SPECIFIC_BINDING                                | -1.31 | 4    | 0 | 0 | 0 | not significant |
| 1778 | GO_TRANSFERASE_ACTIVITY_TRANSFERRING_PHOSPHORUS_CONTAINING_GROUF  | -1.31 | 4    | 0 | 0 | 0 | not significant |
| 1779 | GO_PROTEIN_AUTOPHOSPHORYLATION                                    | -1.31 | 1.68 | 0 | 0 | 0 | not significant |
| 1780 | GO_REGULATION_OF_DNA_TEMPLATED_TRANSCRIPTION_IN_RESPONSE_TO_STRE  | -1.31 | 1.59 | 0 | 0 | 0 | not significant |
| 1781 | GO_CYTOSKELETON_DEPENDENT_CYTOKINESIS                             | -1.31 | 1.3  | 0 | 0 | 0 | not significant |
| 1782 | ACEVEDO_LIVER_CANCER_WITH_H3K9ME3_DN                              | -1.31 | 1.26 | 0 | 0 | 0 | not significant |
| 1783 | GO_ION_CHANNEL_BINDING                                            | -1.31 | 1.2  | 0 | 0 | 0 | not significant |
| 1784 | GO_PROTEIN_SUMOYLATION                                            | -1.31 | 1.17 | 0 | 0 | 0 | not significant |
| 1785 | REACTOME_RMTS_METHYLATE_HISTONE_ARGININES                         | -1.31 | 1.1  | 0 | 0 | 0 | not significant |
| 1786 | GO_TRANSCRIPTION_PREINITIATION_COMPLEX_ASSEMBLY                   | -1.31 | 1.02 | 0 | 0 | 0 | not significant |
| 1787 | GUTIERREZ_CHRONIC_LYMPHOCTIC_LEUKEMIA_DN                          | -1.31 | 1    | 0 | 0 | 0 | not significant |
| 1788 | PID_FOXM1_PATHWAY                                                 | -1.31 | 0.99 | 0 | 0 | 0 | not significant |
| 1789 | GO_TELOMERIC_DNA_BINDING                                          | -1.31 | 0.98 | 0 | 0 | 0 | not significant |
| 1790 | REACTOME_MITOPHAGY                                                | -1.31 | 0.98 | 0 | 0 | 0 | not significant |
| 1791 | REACTOME_SIGNALING_BY_FGFR4                                       | -1.31 | 0.98 | 0 | 0 | 0 | not significant |
| 1792 | GO_2_OXOGLUTARATE_DEPENDENT_DIOXYGENASE_ACTIVITY                  | -1.31 | 0.97 | 0 | 0 | 0 | not significant |
| 1793 | GO_AMIDE_TRANSMEMBRANE_TRANSPORTER_ACTIVITY                       | -1.31 | 0.96 | 0 | 0 | 0 | not significant |
| 1794 | KEGG_OLFACTORY_TRANSDUCTION                                       | -1.31 | 0.91 | 0 | 0 | 0 | not significant |
| 1795 | GO_PROTEIN_REFOOLDING                                             | -1.31 | 0.9  | 0 | 0 | 0 | not significant |
| 1796 | REACTOME_INTERLEUKIN_6_FAMILY_SIGNALING                           | -1.31 | 0.9  | 0 | 0 | 0 | not significant |
| 1797 | GO_RIBONUCLEASE_P_ACTIVITY                                        | -1.31 | 0.85 | 0 | 0 | 0 | not significant |
| 1798 | BIOCARTA_RNA_PATHWAY                                              | -1.31 | 0.81 | 0 | 0 | 0 | not significant |
| 1799 | GO_HISTONE_METHYLTRANSFERASE_BINDING                              | -1.31 | 0.81 | 0 | 0 | 0 | not significant |
| 1800 | BIOCARTA_NOS1_PATHWAY                                             | -1.31 | 0.8  | 0 | 0 | 0 | not significant |
| 1801 | GO_ATP_DEPENDENT_PEPTIDASE_ACTIVITY                               | -1.31 | 0.8  | 0 | 0 | 0 | not significant |
| 1802 | GO_REGULATION_OF_MRNA_POLYADENYLATION                             | -1.31 | 0.8  | 0 | 0 | 0 | not significant |
| 1803 | GO_TYPE_I_INTERFERON_SECRETION                                    | -1.31 | 0.8  | 0 | 0 | 0 | not significant |
| 1804 | GO_ENDOPLASMIC_RETICULUM_EXIT_SITE                                | -1.31 | 0.79 | 0 | 0 | 0 | not significant |
| 1805 | GO_RIBOSOMAL_LARGE_SUBUNIT_BINDING                                | -1.31 | 0.79 | 0 | 0 | 0 | not significant |
| 1806 | WANG_IMMORTALIZED_BY_HOXA9_AND_MEIS1_UP                           | -1.31 | 0.78 | 0 | 0 | 0 | not significant |
| 1807 | GO_FEMALE_PONUCLEUS                                               | -1.31 | 0.77 | 0 | 0 | 0 | not significant |
| 1808 | GO_ALKALI_METAL_ION_BINDING                                       | -1.31 | 0.75 | 0 | 0 | 0 | not significant |
| 1809 | GO_RIBONUCLEASE_MRP_COMPLEX                                       | -1.31 | 0.75 | 0 | 0 | 0 | not significant |
| 1810 | GO_STAT_FAMILY_PROTEIN_BINDING                                    | -1.31 | 0.73 | 0 | 0 | 0 | not significant |
| 1811 | GO_CHROMOSOME_ORGANIZATION                                        | -1.30 | 4    | 0 | 0 | 0 | not significant |
| 1812 | GO_HYDROLASE_ACTIVITY_ACTING_ON_ACID_ANHYDRIDES                   | -1.30 | 4    | 0 | 0 | 0 | not significant |
| 1813 | GO_NEGATIVE_REGULATION_OF_CELLULAR_COMPONENT_ORGANIZATION         | -1.30 | 4    | 0 | 0 | 0 | not significant |
| 1814 | GO_REGULATION_OF_CELLULAR_PROTEIN_CATABOLIC_PROCESS               | -1.30 | 1.56 | 0 | 0 | 0 | not significant |
| 1815 | TGFB_UP.V1_UP                                                     | -1.30 | 1.3  | 0 | 0 | 0 | not significant |
| 1816 | GO_HEAT_SHOCK_PROTEIN_BINDING                                     | -1.30 | 1.28 | 0 | 0 | 0 | not significant |
| 1817 | GO_PROTEIN_TARGETING_TO_MITOCHONDRION                             | -1.30 | 1.2  | 0 | 0 | 0 | not significant |
| 1818 | CHR14Q32                                                          | -1.30 | 1.16 | 0 | 0 | 0 | not significant |
| 1819 | FAELT_B_CLL_WITH_VH3_21_UP                                        | -1.30 | 1.11 | 0 | 0 | 0 | not significant |
| 1820 | GO_INTRACELLULAR_PROTEIN_TRANSMEMBRANE_TRANSPORT                  | -1.30 | 1.02 | 0 | 0 | 0 | not significant |
| 1821 | GO_RNA_POLYADENYLATION                                            | -1.30 | 1    | 0 | 0 | 0 | not significant |
| 1822 | KORKOLA_EMBRYONAL_CARCINOMA_UP                                    | -1.30 | 0.98 | 0 | 0 | 0 | not significant |
| 1823 | REACTOME_SIGNALING_BY_FGFR3                                       | -1.30 | 0.94 | 0 | 0 | 0 | not significant |
| 1824 | REACTOME_SIGNALING_BY_FGFR1                                       | -1.30 | 0.93 | 0 | 0 | 0 | not significant |
| 1825 | STARK_HYPPOCAMPUS_22Q11_DELETION_UP                               | -1.30 | 0.93 | 0 | 0 | 0 | not significant |
| 1826 | REACTOME_GENE_AND_PROTEIN_EXPRESSION_BY_JAK_STAT_SIGNALING_AFTER  | -1.30 | 0.91 | 0 | 0 | 0 | not significant |
| 1827 | KEGG_HEDGEHOG_SIGNALING_PATHWAY                                   | -1.30 | 0.9  | 0 | 0 | 0 | not significant |
| 1828 | AMIT_EGF_RESPONSE_120_MCF10A                                      | -1.30 | 0.88 | 0 | 0 | 0 | not significant |
| 1829 | GO_DYNEIN_COMPLEX_BINDING                                         | -1.30 | 0.87 | 0 | 0 | 0 | not significant |
| 1830 | CHR1Q41                                                           | -1.30 | 0.85 | 0 | 0 | 0 | not significant |
| 1831 | KIM_HYPOXIA                                                       | -1.30 | 0.85 | 0 | 0 | 0 | not significant |
| 1832 | GO_NEGATIVE_REGULATION_OF_CALCINEURIN_MEDIATED_SIGNALING          | -1.30 | 0.83 | 0 | 0 | 0 | not significant |
| 1833 | GO_ENUCLEATE_ERYTHROCYTE_DIFFERENTIATION                          | -1.30 | 0.82 | 0 | 0 | 0 | not significant |
| 1834 | GO_METANEPHRIC_EPITHELIUM_DEVELOPMENT                             | -1.30 | 0.82 | 0 | 0 | 0 | not significant |
| 1835 | GO_SODIUM_CHANNEL_REGULATOR_ACTIVITY                              | -1.30 | 0.82 | 0 | 0 | 0 | not significant |
| 1836 | GO_FEMALE_MEIOSIS_CHROMOSOME_SEGREGATION                          | -1.30 | 0.8  | 0 | 0 | 0 | not significant |
| 1837 | GO_RESPONSE_TO_IRON_III_ION                                       | -1.30 | 0.8  | 0 | 0 | 0 | not significant |
| 1838 | GO_CARDIOLIPIN_METABOLIC_PROCESS                                  | -1.30 | 0.79 | 0 | 0 | 0 | not significant |
| 1839 | REACTOME_ASSEMBLY_AND_CELL_SURFACE_PRESENTATION_OF_NMDA_RECEPT    | -1.30 | 0.79 | 0 | 0 | 0 | not significant |
| 1840 | SUZUKI_RESPONSE_TO_TSA                                            | -1.30 | 0.79 | 0 | 0 | 0 | not significant |
| 1841 | GO_DYNACTIN_BINDING                                               | -1.30 | 0.78 | 0 | 0 | 0 | not significant |

|      |                                                                    |       |      |   |   |   |                 |
|------|--------------------------------------------------------------------|-------|------|---|---|---|-----------------|
| 1842 | GO_NUCLEAR_PORE_CENTRAL_TRANSPORT_CHANNEL                          | -1.30 | 0.78 | 0 | 0 | 0 | not significant |
| 1843 | YAMANAKA_GLIOMASTOMA_SURVIVAL_UP                                   | -1.30 | 0.78 | 0 | 0 | 0 | not significant |
| 1844 | GO_CHEMOKINE_C_X_C_MOTIF_LIGAND_2_PRODUCTION                       | -1.30 | 0.77 | 0 | 0 | 0 | not significant |
| 1845 | GO_PERICARDIUM_DEVELOPMENT                                         | -1.30 | 0.77 | 0 | 0 | 0 | not significant |
| 1846 | GO_NADH_METABOLIC_PROCESS                                          | -1.30 | 0.76 | 0 | 0 | 0 | not significant |
| 1847 | REACTOME_PROSTACYCLIN_SIGNALING_THROUGH_PROSTACYCLIN_RECEPTOR      | -1.30 | 0.75 | 0 | 0 | 0 | not significant |
| 1848 | GO_DENDRITIC_GROWTH_CONE                                           | -1.30 | 0.74 | 0 | 0 | 0 | not significant |
| 1849 | GO_HOST_INTRACELLULAR_PART                                         | -1.30 | 0.73 | 0 | 0 | 0 | not significant |
| 1850 | GO_MIRNA_CATABOLIC_PROCESS                                         | -1.30 | 0.72 | 0 | 0 | 0 | not significant |
| 1851 | REACTOME_BINDING_OF_TCF_LEF_CTNNB1_TO_TARGET_GENE_PROMOTERS        | -1.30 | 0.72 | 0 | 0 | 0 | not significant |
| 1852 | FARMER_BREAST_CANCER_BASAL_VS_LUMINAL                              | -1.29 | 1.83 | 0 | 0 | 0 | not significant |
| 1853 | REACTOME_REGULATION_OF_EXPRESSION_OF_SLITS_AND_ROBOS               | -1.29 | 1.74 | 0 | 0 | 0 | not significant |
| 1854 | REACTOME_ESR_MEDIATED_SIGNALING                                    | -1.29 | 1.61 | 0 | 0 | 0 | not significant |
| 1855 | ALCALAY_AML_BY_NPM1_LOCALIZATION_DN                                | -1.29 | 1.53 | 0 | 0 | 0 | not significant |
| 1856 | GO_MITOCHONDRIAL_MEMBRANE_PART                                     | -1.29 | 1.45 | 0 | 0 | 0 | not significant |
| 1857 | SMITH_TERT_TARGETS_UP                                              | -1.29 | 1.32 | 0 | 0 | 0 | not significant |
| 1858 | LI_AMPLIFIED_IN_LUNG_CANCER                                        | -1.29 | 1.26 | 0 | 0 | 0 | not significant |
| 1859 | CHIARADONNA_NEOPLASTIC_TRANSFORMATION_CDC25_UP                     | -1.29 | 1.17 | 0 | 0 | 0 | not significant |
| 1860 | FERRANDO_T_ALL_WITH_MLL_ENL_FUSION_DN                              | -1.29 | 1.17 | 0 | 0 | 0 | not significant |
| 1861 | NIKOLSKY_MUTATED_AND_AMPLIFIED_IN_BREAST_CANCER                    | -1.29 | 1.02 | 0 | 0 | 0 | not significant |
| 1862 | PJAJANA_BREAST_CANCER_WITH_BRCA1_MUTATED_UP                        | -1.29 | 1.02 | 0 | 0 | 0 | not significant |
| 1863 | CHR3Q29                                                            | -1.29 | 0.99 | 0 | 0 | 0 | not significant |
| 1864 | GAZDA_DIAMOND_BLACKFAN_ANEMIA_ERYTHROID_UP                         | -1.29 | 0.95 | 0 | 0 | 0 | not significant |
| 1865 | CHR1P31                                                            | -1.29 | 0.94 | 0 | 0 | 0 | not significant |
| 1866 | JIANG_AGING_HYPOTHALAMUS_DN                                        | -1.29 | 0.94 | 0 | 0 | 0 | not significant |
| 1867 | GO_REGULATION_OF_LAMELLIPODIUM_ORGANIZATION                        | -1.29 | 0.9  | 0 | 0 | 0 | not significant |
| 1868 | GO_POSITIVE_REGULATION_OF_PROTEIN_DEPHOSPHORYLATION                | -1.29 | 0.87 | 0 | 0 | 0 | not significant |
| 1869 | REACTOME_PERVASIVE_DEVELOPMENTAL_DISORDERS                         | -1.29 | 0.86 | 0 | 0 | 0 | not significant |
| 1870 | GO_GlutAMINE_FAMILY_AMINO_ACID_CATABOLIC_PROCESS                   | -1.29 | 0.84 | 0 | 0 | 0 | not significant |
| 1871 | GO_NEGATIVE_REGULATION_OF_CELLULAR_RESPONSE_TO_INSULIN_STIMULUS    | -1.29 | 0.84 | 0 | 0 | 0 | not significant |
| 1872 | GO_RRNA_MODIFICATION                                               | -1.29 | 0.83 | 0 | 0 | 0 | not significant |
| 1873 | GO_POSITIVE_REGULATION_OF_PROTEIN_LOCALIZATION_TO_CENTROSOME       | -1.29 | 0.83 | 0 | 0 | 0 | not significant |
| 1874 | GO_REGULATION_OF_TYPE_I_INTERFERON_MEDIATED_SIGNALING_PATHWAY      | -1.29 | 0.81 | 0 | 0 | 0 | not significant |
| 1875 | GO_NEGATIVE_REGULATION_OF_TYROSINE_PHOSPHORYLATION_OF_STAT_PROT    | -1.29 | 0.8  | 0 | 0 | 0 | not significant |
| 1876 | GO_PROTEIN_KINASE_A_REGULATORY_SUBUNIT_BINDING                     | -1.29 | 0.8  | 0 | 0 | 0 | not significant |
| 1877 | REACTOME_CREB1_PHOSPHORYLATION_THROUGH_THE_ACTIVATION_OF_ADENYL    | -1.29 | 0.78 | 0 | 0 | 0 | not significant |
| 1878 | GO_DNA_APURINIC_OR_APYRIMIDINIC_SITE_ENDONUCLEASE_ACTIVITY         | -1.29 | 0.77 | 0 | 0 | 0 | not significant |
| 1879 | IVANOV_MUTATED_IN_COLON_CANCER                                     | -1.29 | 0.77 | 0 | 0 | 0 | not significant |
| 1880 | GO_CLASS_I_DNA_APURINIC_OR_APYRIMIDINIC_SITE_ENDONUCLEASE_ACTIVITY | -1.29 | 0.75 | 0 | 0 | 0 | not significant |
| 1881 | GO_NEGATIVE_REGULATION_OF_NITRIC_OXIDE_BIOSYNTHETIC_PROCESS        | -1.29 | 0.74 | 0 | 0 | 0 | not significant |
| 1882 | GO_NEGATIVE_REGULATION_OF_CELL_ADHESION_MEDIATED_BY_INTEGRIN       | -1.29 | 0.72 | 0 | 0 | 0 | not significant |
| 1883 | REACTOME_WAX_AND_PLASMALOGEN_BIOSYNTHESIS                          | -1.29 | 0.72 | 0 | 0 | 0 | not significant |
| 1884 | SCHWAB_TARGETS_OF_BMYB_POLYMORPHIC_VARIANTS_UP                     | -1.29 | 0.72 | 0 | 0 | 0 | not significant |
| 1885 | GO_RESPONSE_TO_INACTIVITY                                          | -1.29 | 0.71 | 0 | 0 | 0 | not significant |
| 1886 | SUZUKI_CTCFL_TARGETS_UP                                            | -1.29 | 0.71 | 0 | 0 | 0 | not significant |
| 1887 | GO_REGULATION_OF_VITAMIN_D_RECEPTOR_SIGNALING_PATHWAY              | -1.29 | 0.68 | 0 | 0 | 0 | not significant |
| 1888 | GO_CELLULAR_MACROMOLECULE_CATABOLIC_PROCESS                        | -1.28 | 4    | 0 | 0 | 0 | not significant |
| 1889 | IVANOVA_HEMATOPOIESIS_EARLY_PROGENITOR                             | -1.28 | 1.85 | 0 | 0 | 0 | not significant |
| 1890 | HALLMARK_GLYCOLYSIS                                                | -1.28 | 1.67 | 0 | 0 | 0 | not significant |
| 1891 | GO_CANONICAL_WNT_SIGNALING_PATHWAY                                 | -1.28 | 1.57 | 0 | 0 | 0 | not significant |
| 1892 | PJAJANA_XPRSS_INT_NETWORK                                          | -1.28 | 1.4  | 0 | 0 | 0 | not significant |
| 1893 | BOYLAN_MULTIPLE_MYELOMA_C_D_UP                                     | -1.28 | 1.35 | 0 | 0 | 0 | not significant |
| 1894 | REACTOME_REGULATION_OF_TP53_ACTIVITY_THROUGH_PHOSPHORYLATION       | -1.28 | 1.2  | 0 | 0 | 0 | not significant |
| 1895 | GO_REGULATION_OF_SYNAPTIC_PLASTICITY                               | -1.28 | 1.18 | 0 | 0 | 0 | not significant |
| 1896 | GO_PROTEIN_TRANSMEMBRANE_TRANSPORT                                 | -1.28 | 1.08 | 0 | 0 | 0 | not significant |
| 1897 | GO_MUSCLE_CELL_APOPTOTIC_PROCESS                                   | -1.28 | 0.99 | 0 | 0 | 0 | not significant |
| 1898 | GO_ADP_BINDING                                                     | -1.28 | 0.98 | 0 | 0 | 0 | not significant |
| 1899 | GO_ANIMAL_ORGAN_REGENERATION                                       | -1.28 | 0.95 | 0 | 0 | 0 | not significant |
| 1900 | DORN_ADENOVIRUS_INFECTION_12HR_DN                                  | -1.28 | 0.93 | 0 | 0 | 0 | not significant |
| 1901 | GO_POSITIVE_REGULATION_OF_VIRAL_TRANSCRIPTION                      | -1.28 | 0.92 | 0 | 0 | 0 | not significant |
| 1902 | GO_NEGATIVE_REGULATION_OF_REPRODUCTIVE_PROCESS                     | -1.28 | 0.89 | 0 | 0 | 0 | not significant |
| 1903 | DELPUECH_FOXO3_TARGETS_DN                                          | -1.28 | 0.88 | 0 | 0 | 0 | not significant |
| 1904 | YOKOE_CANCER_TESTIS_ANTIGENS                                       | -1.28 | 0.87 | 0 | 0 | 0 | not significant |
| 1905 | PID_EPHB_FWD_PATHWAY                                               | -1.28 | 0.85 | 0 | 0 | 0 | not significant |
| 1906 | REACTOME_NEGATIVE_REGULATION_OF_FGFR3_SIGNALING                    | -1.28 | 0.85 | 0 | 0 | 0 | not significant |
| 1907 | GO_MRNA_CLEAVAGE                                                   | -1.28 | 0.84 | 0 | 0 | 0 | not significant |
| 1908 | GO_PROTEIN_PEPTIDYL_PROLYL_ISOMERIZATION                           | -1.28 | 0.84 | 0 | 0 | 0 | not significant |
| 1909 | GO_ATP_BIOSYNTHETIC_PROCESS                                        | -1.28 | 0.83 | 0 | 0 | 0 | not significant |
| 1910 | WEST_ADRENOCORTICAL_TUMOR_MARKERS_UP                               | -1.28 | 0.83 | 0 | 0 | 0 | not significant |
| 1911 | YAO_TEMPORAL_RESPONSE_TO_PROGESTERONE_CLUSTER_8                    | -1.28 | 0.83 | 0 | 0 | 0 | not significant |
| 1912 | GO_A_BAND                                                          | -1.28 | 0.82 | 0 | 0 | 0 | not significant |
| 1913 | REACTOME_ANTIGEN_ACTIVATES_B_CELL_RECEPTOR_BCR_LEADING_TO_GENER    | -1.28 | 0.82 | 0 | 0 | 0 | not significant |
| 1914 | GO_CELL_COMMUNICATION_BY_ELECTRICAL_COUPLING_INVOLVED_IN_CARDIAC_C | -1.28 | 0.81 | 0 | 0 | 0 | not significant |
| 1915 | GO_EUCHROMATIN                                                     | -1.28 | 0.81 | 0 | 0 | 0 | not significant |
| 1916 | GO_REGULATION_OF_LAMELLIPODIUM_ASSEMBLY                            | -1.28 | 0.81 | 0 | 0 | 0 | not significant |
| 1917 | BIOCARTA_WNT_PATHWAY                                               | -1.28 | 0.8  | 0 | 0 | 0 | not significant |
| 1918 | GO_NEGATIVE_REGULATION_OF_NEUROLOGICAL_SYSTEM_PROCESS              | -1.28 | 0.79 | 0 | 0 | 0 | not significant |
| 1919 | REACTOME_SIGNALING_BY_FGFR3_FUSIONS_IN_CANCER                      | -1.28 | 0.78 | 0 | 0 | 0 | not significant |
| 1920 | COLIN_PILOCYTIC_ASTROCYTOMA_VS_GLIOMASTOMA_DN                      | -1.28 | 0.77 | 0 | 0 | 0 | not significant |
| 1921 | GO_COPPER_ION_HOMEOSTASIS                                          | -1.28 | 0.76 | 0 | 0 | 0 | not significant |
| 1922 | GO_E_BOX_BINDING                                                   | -1.28 | 0.76 | 0 | 0 | 0 | not significant |
| 1923 | GO_PHOSPHORYLATION_OF_RNA_POLYMERASE_II_C_TERMINAL_DOMAIN          | -1.28 | 0.76 | 0 | 0 | 0 | not significant |
| 1924 | GO_BEHAVIORAL_RESPONSE_TO_COCAINE                                  | -1.28 | 0.75 | 0 | 0 | 0 | not significant |
| 1925 | GO_POSITIVE_REGULATION_OF_SMOOTH_MUSCLE_CELL_APOPTOTIC_PROCESS     | -1.28 | 0.75 | 0 | 0 | 0 | not significant |
| 1926 | REACTOME_ATF6_ATF6_ALPHA_ACTIVATES_CHAPERONES                      | -1.28 | 0.75 | 0 | 0 | 0 | not significant |
| 1927 | REACTOME_NOTCH3_ACTIVATION_AND_TRANSMISSION_OF_SIGNAL_TO_THE_NUCI  | -1.28 | 0.75 | 0 | 0 | 0 | not significant |
| 1928 | REACTOME_TRAF3_DEPENDENT_IRF_ACTIVATION_PATHWAY                    | -1.28 | 0.75 | 0 | 0 | 0 | not significant |
| 1929 | GO_POSITIVE_REGULATION_OF_T_HELPER_2_CELL_DIFFERENTIATION          | -1.28 | 0.74 | 0 | 0 | 0 | not significant |
| 1930 | GO_ARRESTIN_FAMILY_PROTEIN_BINDING                                 | -1.28 | 0.73 | 0 | 0 | 0 | not significant |
| 1931 | GO_CARDIOLIPIN_ACYL_CHAIN_REMODELING                               | -1.28 | 0.73 | 0 | 0 | 0 | not significant |
| 1932 | GO_PROTEIN_COFACTOR_LINKAGE                                        | -1.28 | 0.73 | 0 | 0 | 0 | not significant |
| 1933 | REACTOME_G2_M_DNA_REPLICATION_CHECKPOINT                           | -1.28 | 0.73 | 0 | 0 | 0 | not significant |
| 1934 | REACTOME_SHC_MEDIATED_CASCADE_FGFR4                                | -1.28 | 0.73 | 0 | 0 | 0 | not significant |
| 1935 | GO_MULTI_ORGANISM_CELLULAR_LOCALIZATION                            | -1.28 | 0.72 | 0 | 0 | 0 | not significant |
| 1936 | GO_NEGATIVE_REGULATION_OF_HIPPO_SIGNALING                          | -1.28 | 0.7  | 0 | 0 | 0 | not significant |
| 1937 | GO_INSULIN_RECEPTOR_SUBSTRATE_BINDING                              | -1.28 | 0.69 | 0 | 0 | 0 | not significant |
| 1938 | GO_NEGATIVE_REGULATION_OF_NUCLEASE_ACTIVITY                        | -1.28 | 0.69 | 0 | 0 | 0 | not significant |
| 1939 | GO_RESPONSE_TO_MUSCLE_INACTIVITY                                   | -1.28 | 0.69 | 0 | 0 | 0 | not significant |
| 1940 | GO_REGULATION_OF_DNA_TOPOISOMERASE_ATP_HYDROLYZING_ACTIVITY        | -1.28 | 0.68 | 0 | 0 | 0 | not significant |
| 1941 | GO_HISTONE_METHYLTRANSFERASE_ACTIVITY_H3_K36_SPECIFIC_             | -1.28 | 0.67 | 0 | 0 | 0 | not significant |
| 1942 | GO_N_TERMINAL_PROTEIN_ACETYLTRANSFERASE_COMPLEX                    | -1.28 | 0.67 | 0 | 0 | 0 | not significant |
| 1943 | GO_REGULATION_OF_PLATELET_AGGREGATION                              | -1.28 | 0.67 | 0 | 0 | 0 | not significant |
| 1944 | BIOCARTA_CACAM_PATHWAY                                             | -1.28 | 0.65 | 0 | 0 | 0 | not significant |
| 1945 | GO_ESTABLISHMENT_OF_PROTEIN_LOCALIZATION_TO_ORGANELLE              | -1.27 | 4    | 0 | 0 | 0 | not significant |
| 1946 | GO_TISSUE_MORPHOGENESIS                                            | -1.27 | 4    | 0 | 0 | 0 | not significant |
| 1947 | KIM_WT1_TARGETS_DN                                                 | -1.27 | 2.16 | 0 | 0 | 0 | not significant |
| 1948 | FLECHNER_BIOPSY_KIDNEY_TRANSPLANT_OK_VS_DONOR_UP                   | -1.27 | 2.13 | 0 | 0 | 0 | not significant |
| 1949 | GO_PEPTIDE_BIOSYNTHETIC_PROCESS                                    | -1.27 | 1.94 | 0 | 0 | 0 | not significant |
| 1950 | DUTERTRE ESTRADIOL_RESPONSE_24HR_UP                                | -1.27 | 1.87 | 0 | 0 | 0 | not significant |

|      |                                                                   |       |      |   |   |   |                 |
|------|-------------------------------------------------------------------|-------|------|---|---|---|-----------------|
| 1951 | GO_ORGANELLE_LOCALIZATION                                         | -1.27 | 1.7  | 0 | 0 | 0 | not significant |
| 1952 | GO_NEGATIVE_REGULATION_OF_CELLULAR_CATABOLIC_PROCESS              | -1.27 | 1.57 | 0 | 0 | 0 | not significant |
| 1953 | GO_ELECTRON_TRANSPORT_CHAIN                                       | -1.27 | 1.21 | 0 | 0 | 0 | not significant |
| 1954 | DAZARD_RESPONSE_TO_UV_SCC_DN                                      | -1.27 | 1.11 | 0 | 0 | 0 | not significant |
| 1955 | BROWN_MYELOID_CELL_DEVELOPMENT_DN                                 | -1.27 | 1.07 | 0 | 0 | 0 | not significant |
| 1956 | GO_PROTEIN_TYROSINE_PHOSPHATASE_ACTIVITY                          | -1.27 | 1.06 | 0 | 0 | 0 | not significant |
| 1957 | GO_CHROMATIN_DNA_BINDING                                          | -1.27 | 1.05 | 0 | 0 | 0 | not significant |
| 1958 | GO_REGULATION_OF_DNA_BIOSYNTHETIC_PROCESS                         | -1.27 | 1.05 | 0 | 0 | 0 | not significant |
| 1959 | REACTOME_DNA_DOUBLE_STRAND_BREAK_RESPONSE                         | -1.27 | 1.04 | 0 | 0 | 0 | not significant |
| 1960 | REACTOME_PROTEIN_UBIQUITINATION                                   | -1.27 | 1.02 | 0 | 0 | 0 | not significant |
| 1961 | DACOSTA_UV_RESPONSE_VIA_ERCC3_TTD_DN                              | -1.27 | 1.01 | 0 | 0 | 0 | not significant |
| 1962 | GO_CARBOXYL_OXYGEN_LYASE_ACTIVITY                                 | -1.27 | 0.95 | 0 | 0 | 0 | not significant |
| 1963 | DAVICIONI_TARGETS_OF_PAX_FOXP1_FUSIONS_DN                         | -1.27 | 0.94 | 0 | 0 | 0 | not significant |
| 1964 | FRASOR_RESPONSE_TO_SERM_OR_FULVESTRANT_DN                         | -1.27 | 0.94 | 0 | 0 | 0 | not significant |
| 1965 | GO_POSITIVE_REGULATION_OF_VIRAL_GENOME_REPLICATION                | -1.27 | 0.93 | 0 | 0 | 0 | not significant |
| 1966 | GO_POSITIVE_REGULATION_OF_ATPASE_ACTIVITY                         | -1.27 | 0.92 | 0 | 0 | 0 | not significant |
| 1967 | REACTOME_REGULATION_OF_INSULIN_SECRETION                          | -1.27 | 0.87 | 0 | 0 | 0 | not significant |
| 1968 | BIOCARTA_ERK_PATHWAY                                              | -1.27 | 0.85 | 0 | 0 | 0 | not significant |
| 1969 | BIOCARTA_IGF1R_PATHWAY                                            | -1.27 | 0.85 | 0 | 0 | 0 | not significant |
| 1970 | GO_RESPONSE_TO_CATECHOLAMINE                                      | -1.27 | 0.84 | 0 | 0 | 0 | not significant |
| 1971 | GO_NEGATIVE_REGULATION_OF_TELOMERE_MAINTENANCE_VIA_TELOMERE_LENC  | -1.27 | 0.81 | 0 | 0 | 0 | not significant |
| 1972 | MACLACHLAN_BRCA1_TARGETS_UP                                       | -1.27 | 0.81 | 0 | 0 | 0 | not significant |
| 1973 | CHR11P13                                                          | -1.27 | 0.79 | 0 | 0 | 0 | not significant |
| 1974 | REACTOME_TRIGLYCERIDE_METABOLISM                                  | -1.27 | 0.79 | 0 | 0 | 0 | not significant |
| 1975 | STEIN_ESRRA_TARGETS_RESPONSIVE_TO_ESTROGEN_UP                     | -1.27 | 0.79 | 0 | 0 | 0 | not significant |
| 1976 | SILIGAN_BOUND_BY_EWS_FLT1_FUSION                                  | -1.27 | 0.78 | 0 | 0 | 0 | not significant |
| 1977 | GO_AXONAL_GROWTH_CONE                                             | -1.27 | 0.77 | 0 | 0 | 0 | not significant |
| 1978 | GO_TRANSCRIPTION_INITIATION_FROM_RNA_POLYMERASE_III_PROMOTER      | -1.27 | 0.75 | 0 | 0 | 0 | not significant |
| 1979 | HERNANDEZ_ABERRANT_MITOSIS_BY_DOCETACEL_4NM_DN                    | -1.27 | 0.75 | 0 | 0 | 0 | not significant |
| 1980 | GO_1_PHOSPHATIDYLINOSITOL_3_KINASE_REGULATOR_ACTIVITY             | -1.27 | 0.74 | 0 | 0 | 0 | not significant |
| 1981 | GO_POSITIVE_REGULATION_OF_PROTEIN_MONOUBIQUITINATION              | -1.27 | 0.74 | 0 | 0 | 0 | not significant |
| 1982 | FINETTI_BREAST_CANCERS_KINOME_GRAY                                | -1.27 | 0.73 | 0 | 0 | 0 | not significant |
| 1983 | GO_EMBRYONIC_HINDLIMB_MORPHOGENESIS                               | -1.27 | 0.73 | 0 | 0 | 0 | not significant |
| 1984 | GO_RESPONSE_TO_IRON_ION                                           | -1.27 | 0.73 | 0 | 0 | 0 | not significant |
| 1985 | GO_RESPONSE_TO_PROSTAGLANDIN_E                                    | -1.27 | 0.73 | 0 | 0 | 0 | not significant |
| 1986 | MACLACHLAN_BRCA1_TARGETS_DN                                       | -1.27 | 0.73 | 0 | 0 | 0 | not significant |
| 1987 | GO_SMOOTH_MUSCLE_CELL_APOPTOTIC_PROCESS                           | -1.27 | 0.72 | 0 | 0 | 0 | not significant |
| 1988 | GO_MITOCHONDRIAL_OUTER_MEMBRANE_TRANSLOCASE_COMPLEX               | -1.27 | 0.71 | 0 | 0 | 0 | not significant |
| 1989 | GO_REGULATION_OF_GLIAL_CELL_APOPTOTIC_PROCESS                     | -1.27 | 0.7  | 0 | 0 | 0 | not significant |
| 1990 | YAO_TEMPORAL_RESPONSE_TO_PROGESTERONE_CLUSTER_4                   | -1.27 | 0.7  | 0 | 0 | 0 | not significant |
| 1991 | GO_CELLULAR_RESPONSE_TO_INSULIN LIKE_GROWTH_FACTOR_STIMULUS       | -1.27 | 0.69 | 0 | 0 | 0 | not significant |
| 1992 | GO_STRESS_RESPONSE_TO_METAL_ION                                   | -1.27 | 0.69 | 0 | 0 | 0 | not significant |
| 1993 | REACTOME_ACTIVATED_NTRK3_SIGNALS_THROUGH_RAS                      | -1.27 | 0.69 | 0 | 0 | 0 | not significant |
| 1994 | REACTOME_SHC1_EVENTS_IN_EGFR_SIGNALING                            | -1.27 | 0.68 | 0 | 0 | 0 | not significant |
| 1995 | GO_REGULATION_OF_CYTOSKELETON_ORGANIZATION                        | -1.27 | 2.18 | 0 | 0 | 0 | not significant |
| 1996 | GO_REGULATION_OF_DNA_METABOLIC_PROCESS                            | -1.26 | 1.73 | 0 | 0 | 0 | not significant |
| 1997 | GO_CYTOPLASMIC_REGION                                             | -1.26 | 1.57 | 0 | 0 | 0 | not significant |
| 1998 | GO_TRANSLATIONAL_INITIATION                                       | -1.26 | 1.33 | 0 | 0 | 0 | not significant |
| 1999 | GO_TRANSLATIONAL_ELONGATION                                       | -1.26 | 1.26 | 0 | 0 | 0 | not significant |
| 2000 | REACTOME_FACTORS_INVOLVED_IN_MEGAKARYOCYTE_DEVELOPMENT_AND_PLA    | -1.26 | 1.23 | 0 | 0 | 0 | not significant |
| 2001 | GO_HISTONE_DEACETYLASE_BINDING                                    | -1.26 | 1.21 | 0 | 0 | 0 | not significant |
| 2002 | YAMAZAKI_TCEB3_TARGETS_DN                                         | -1.26 | 1.21 | 0 | 0 | 0 | not significant |
| 2003 | GO_MESENCHYMAL_CELL_DIFFERENTIATION                               | -1.26 | 1.17 | 0 | 0 | 0 | not significant |
| 2004 | MILI_PSEUDOPODIA_CHEMOTAXIS_UP                                    | -1.26 | 1.15 | 0 | 0 | 0 | not significant |
| 2005 | CAIRO_LIVER_DEVELOPMENT_UP                                        | -1.26 | 1.14 | 0 | 0 | 0 | not significant |
| 2006 | LABBE_WNT3A_TARGETS_UP                                            | -1.26 | 1.11 | 0 | 0 | 0 | not significant |
| 2007 | CHR1Q42                                                           | -1.26 | 1.08 | 0 | 0 | 0 | not significant |
| 2008 | GO_CARDIAC_MUSCLE_TISSUE_DEVELOPMENT                              | -1.26 | 1.07 | 0 | 0 | 0 | not significant |
| 2009 | REACTOME_SIGNALING_BY_TGF_BETA_RECEPTOR_COMPLEX                   | -1.26 | 1    | 0 | 0 | 0 | not significant |
| 2010 | REACTOME_TRANSCRIPTIONAL_ACTIVITY_OF_SMAD2_SMAD3_SMAD4_HETEROTRIM | -1.26 | 0.99 | 0 | 0 | 0 | not significant |
| 2011 | PID_P53_REGULATION_PATHWAY                                        | -1.26 | 0.96 | 0 | 0 | 0 | not significant |
| 2012 | GO_INTRINSIC_COMPONENT_OF_MITOCHONDRIAL_MEMBRANE                  | -1.26 | 0.95 | 0 | 0 | 0 | not significant |
| 2013 | GO_LAMELLIPODIUM_ASSEMBLY                                         | -1.26 | 0.91 | 0 | 0 | 0 | not significant |
| 2014 | DUAN_PRDM5_TARGETS                                                | -1.26 | 0.9  | 0 | 0 | 0 | not significant |
| 2015 | GO_MEDIATOR_COMPLEX                                               | -1.26 | 0.89 | 0 | 0 | 0 | not significant |
| 2016 | GO_ATPASE_REGULATOR_ACTIVITY                                      | -1.26 | 0.87 | 0 | 0 | 0 | not significant |
| 2017 | PID_TRKR_PATHWAY                                                  | -1.26 | 0.86 | 0 | 0 | 0 | not significant |
| 2018 | GO_POSITIVE_REGULATION_OF_REPRODUCTIVE_PROCESS                    | -1.26 | 0.84 | 0 | 0 | 0 | not significant |
| 2019 | GO_RIBONUCLEOSIDE_TRIPHOSPHATE_BIOSYNTHETIC_PROCESS               | -1.26 | 0.84 | 0 | 0 | 0 | not significant |
| 2020 | GO_NEGATIVE_REGULATION_OF_MITOCHONDRION_ORGANIZATION              | -1.26 | 0.82 | 0 | 0 | 0 | not significant |
| 2021 | CORDENONSI_YAP_CONSERVED_SIGNATURE                                | -1.26 | 0.81 | 0 | 0 | 0 | not significant |
| 2022 | REACTOME_DARPP_32_EVENTS                                          | -1.26 | 0.81 | 0 | 0 | 0 | not significant |
| 2023 | GO_PROTEIN_DESTABILIZATION                                        | -1.26 | 0.8  | 0 | 0 | 0 | not significant |
| 2024 | REACTOME_AQUAPORIN_MEDIATED_TRANSPORT                             | -1.26 | 0.8  | 0 | 0 | 0 | not significant |
| 2025 | REACTOME_TP53_REGULATES_TRANSCRIPTION_OF_GENES_INVOLVED_IN_G2_CE  | -1.26 | 0.8  | 0 | 0 | 0 | not significant |
| 2026 | SCHLINGEMANN_SKIN_CARCINOGENESIS_TPA_UP                           | -1.26 | 0.79 | 0 | 0 | 0 | not significant |
| 2027 | GO_NUCLEOBASE_CONTAINING_SMALL_MOLECULE_INTERCONVERSION           | -1.26 | 0.78 | 0 | 0 | 0 | not significant |
| 2028 | GO_CELLULAR_RESPONSE_TO_COPPER_ION                                | -1.26 | 0.77 | 0 | 0 | 0 | not significant |
| 2029 | GO_CHAPERONE_MEDIATED_PROTEIN_COMPLEX_ASSEMBLY                    | -1.26 | 0.75 | 0 | 0 | 0 | not significant |
| 2030 | GO_COPII_VESICLE_COAT                                             | -1.26 | 0.75 | 0 | 0 | 0 | not significant |
| 2031 | LI_CYTIDINE_ANALOGS_CYCOTOXICITY                                  | -1.26 | 0.75 | 0 | 0 | 0 | not significant |
| 2032 | STAMBOLSKY_RESPONSE_TO_VITAMIN_D3_DN                              | -1.26 | 0.75 | 0 | 0 | 0 | not significant |
| 2033 | BIOCARTA_DNAFRAGMENT_PATHWAY                                      | -1.26 | 0.73 | 0 | 0 | 0 | not significant |
| 2034 | REACTOME_NEURODEGENERATIVE_DISEASES                               | -1.26 | 0.73 | 0 | 0 | 0 | not significant |
| 2035 | GO_ER_OVERLOAD_RESPONSE                                           | -1.26 | 0.72 | 0 | 0 | 0 | not significant |
| 2036 | GO_SIN3_TYPE_COMPLEX                                              | -1.26 | 0.72 | 0 | 0 | 0 | not significant |
| 2037 | REACTOME_INWARDLY_RECTIFYING_KPLUS_CHANNELS                       | -1.26 | 0.72 | 0 | 0 | 0 | not significant |
| 2038 | GO_PEPTIDYL_ARGININE_MODIFICATION                                 | -1.26 | 0.71 | 0 | 0 | 0 | not significant |
| 2039 | GO_LEWY_BODY                                                      | -1.26 | 0.7  | 0 | 0 | 0 | not significant |
| 2040 | GO_NUCLEAR_PORE_OUTER_RING                                        | -1.26 | 0.7  | 0 | 0 | 0 | not significant |
| 2041 | GO_GLUCOSE_6_PHOSPHATE_METABOLIC_PROCESS                          | -1.26 | 0.69 | 0 | 0 | 0 | not significant |
| 2042 | GO_REGULATION_OF_GOLGI_TO_PLASMA_MEMBRANE_PROTEIN_TRANSPORT       | -1.26 | 0.69 | 0 | 0 | 0 | not significant |
| 2043 | REACTOME_ATF6_ATF6_ALPHA_ACTIVATES_CHAPERONE_GENES                | -1.26 | 0.69 | 0 | 0 | 0 | not significant |
| 2044 | GO_ACROSOME_ASSEMBLY                                              | -1.26 | 0.68 | 0 | 0 | 0 | not significant |
| 2045 | GO_ACTIVATION_INDUCED_CELL_DEATH_OF_T_CELLS                       | -1.26 | 0.68 | 0 | 0 | 0 | not significant |
| 2046 | GO_CELLULAR_RESPONSE_TO_IRON_ION                                  | -1.26 | 0.67 | 0 | 0 | 0 | not significant |
| 2047 | GO_MRNA_TRANSCRIPTION_BY_RNA_POLYMERASE_II                        | -1.26 | 0.67 | 0 | 0 | 0 | not significant |
| 2048 | GO_REGULATION_OF_TRIGLYCERIDE_METABOLIC_PROCESS                   | -1.26 | 0.67 | 0 | 0 | 0 | not significant |
| 2049 | GO_TROPHOBLAST_CELL_MIGRATION                                     | -1.26 | 0.67 | 0 | 0 | 0 | not significant |
| 2050 | REACTOME_PI_3K_CASCADE_FGFR1                                      | -1.26 | 0.66 | 0 | 0 | 0 | not significant |
| 2051 | GO_POLYADENYLATION_DEPENDENT_SNORNA_3_END_PROCESSING              | -1.26 | 0.64 | 0 | 0 | 0 | not significant |
| 2052 | GO_CELLULAR_PROTEIN_CATABOLIC_PROCESS                             | -1.25 | 4    | 0 | 0 | 0 | not significant |
| 2053 | GO_ENZYME_REGULATOR_ACTIVITY                                      | -1.25 | 4    | 0 | 0 | 0 | not significant |
| 2054 | GO_REGULATION_OF_ORGANELLE_ORGANIZATION                           | -1.25 | 4    | 0 | 0 | 0 | not significant |
| 2055 | LINDGREN_BLADDER_CANCER_CLUSTER_1_DN                              | -1.25 | 2.24 | 0 | 0 | 0 | not significant |
| 2056 | KIM_ALL_DISORDERS_CALB1_CORR_UP                                   | -1.25 | 2.06 | 0 | 0 | 0 | not significant |
| 2057 | CREIGHTON_ENDOCRINE_THERAPY_RESISTANCE_1                          | -1.25 | 1.7  | 0 | 0 | 0 | not significant |
| 2058 | GO_MITOCHONDRIAL_MATRIX                                           | -1.25 | 1.64 | 0 | 0 | 0 | not significant |
| 2059 | GO_REGULATION_OF_CELLULAR_AMIDE_METABOLIC_PROCESS                 | -1.25 | 1.56 | 0 | 0 | 0 | not significant |

|      |                                                                    |       |      |   |   |   |                 |
|------|--------------------------------------------------------------------|-------|------|---|---|---|-----------------|
| 2060 | SHEPARD_CRUSH_AND_BURN_MUTANT_UP                                   | -1.25 | 1.46 | 0 | 0 | 0 | not significant |
| 2061 | GO_GTPASE_ACTIVITY                                                 | -1.25 | 1.45 | 0 | 0 | 0 | not significant |
| 2062 | GO_REGULATION_OF_PROTEIN_MODIFICATION_BY_SMALL_PROTEIN_CONJUGATIO  | -1.25 | 1.39 | 0 | 0 | 0 | not significant |
| 2063 | BROWNE_HCMV_INFECTION_18HR_UP                                      | -1.25 | 1.35 | 0 | 0 | 0 | not significant |
| 2064 | GO_PROTEIN_LOCALIZATION_TO_MITOCHONDRION                           | -1.25 | 1.27 | 0 | 0 | 0 | not significant |
| 2065 | REACTOME_TRANSPORT_TO_THE_GOLGI_AND_SUBSEQUENT_MODIFICATION        | -1.25 | 1.21 | 0 | 0 | 0 | not significant |
| 2066 | YAO_TEMPORAL_RESPONSE_TO_PROGESTERONE_CLUSTER_14                   | -1.25 | 1.2  | 0 | 0 | 0 | not significant |
| 2067 | GO_REGULATION_OF_GENERATION_OF_PRECURSOR_METABOLITES_AND_ENERG     | -1.25 | 1.18 | 0 | 0 | 0 | not significant |
| 2068 | GO_OXIDATIVE_PHOSPHORYLATION                                       | -1.25 | 1.17 | 0 | 0 | 0 | not significant |
| 2069 | COLDREN_GEFITIMB_RESISTANCE_UP                                     | -1.25 | 1.02 | 0 | 0 | 0 | not significant |
| 2070 | GO_MODIFICATION_OF_MORPHOLOGY_OR_PHYSIOLOGY_OF_OTHER_ORGANISM      | -1.25 | 1    | 0 | 0 | 0 | not significant |
| 2071 | JL_RESPONSE_TO_FSH_DN                                              | -1.25 | 0.92 | 0 | 0 | 0 | not significant |
| 2072 | KEGG_GLIOMA                                                        | -1.25 | 0.92 | 0 | 0 | 0 | not significant |
| 2073 | KEGG_TIGHT_JUNCTION                                                | -1.25 | 0.92 | 0 | 0 | 0 | not significant |
| 2074 | CERVERA_SDHB_TARGETS_2                                             | -1.25 | 0.91 | 0 | 0 | 0 | not significant |
| 2075 | GO_MUSCLE_ORGAN_MORPHOGENESIS                                      | -1.25 | 0.89 | 0 | 0 | 0 | not significant |
| 2076 | AMIT_EGF_RESPONSE_480_MCF10A                                       | -1.25 | 0.88 | 0 | 0 | 0 | not significant |
| 2077 | AUNG_GASTRIC_CANCER                                                | -1.25 | 0.88 | 0 | 0 | 0 | not significant |
| 2078 | REACTOME_ASSOCIATION_OF_TRIC_CCT_WITH_TARGET_PROTEINS_DURING_BIO   | -1.25 | 0.85 | 0 | 0 | 0 | not significant |
| 2079 | CAMPS_COLON_CANCER_COPY_NUMBER_DN                                  | -1.25 | 0.84 | 0 | 0 | 0 | not significant |
| 2080 | GO_TRANSLATION_INITIATION_FACTOR_BINDING                           | -1.25 | 0.84 | 0 | 0 | 0 | not significant |
| 2081 | GO_CENTRAL_NERVOUS_SYSTEM_NEURON_DEVELOPMENT                       | -1.25 | 0.83 | 0 | 0 | 0 | not significant |
| 2082 | GO_FACE_DEVELOPMENT                                                | -1.25 | 0.81 | 0 | 0 | 0 | not significant |
| 2083 | GROSS_HIF1A_TARGETS_DN                                             | -1.25 | 0.81 | 0 | 0 | 0 | not significant |
| 2084 | WIERENGA_PML_INTERACTOME                                           | -1.25 | 0.81 | 0 | 0 | 0 | not significant |
| 2085 | GO_REGULATION_OF_CELL_AGING                                        | -1.25 | 0.8  | 0 | 0 | 0 | not significant |
| 2086 | CHR2Q21                                                            | -1.25 | 0.78 | 0 | 0 | 0 | not significant |
| 2087 | PID_NEPHRIN_NEPH1_PATHWAY                                          | -1.25 | 0.78 | 0 | 0 | 0 | not significant |
| 2088 | GO_ORGANELLAR_SMALL_RIBOSOMAL_SUBUNIT                              | -1.25 | 0.77 | 0 | 0 | 0 | not significant |
| 2089 | PID_THROMBIN_PAR1_PATHWAY                                          | -1.25 | 0.77 | 0 | 0 | 0 | not significant |
| 2090 | KAPOSI_LIVER_CANCER_MET_UP                                         | -1.25 | 0.76 | 0 | 0 | 0 | not significant |
| 2091 | GO_NUCLEAR_EUCHROMATIN                                             | -1.25 | 0.74 | 0 | 0 | 0 | not significant |
| 2092 | GO_POSITIVE_REGULATION_OF_ORGAN_GROWTH                             | -1.25 | 0.74 | 0 | 0 | 0 | not significant |
| 2093 | PID_ADISS_2PATHWAY                                                 | -1.25 | 0.74 | 0 | 0 | 0 | not significant |
| 2094 | GO_GLUTATHIONE_DISULFIDE_OXIDOREDUCTASE_ACTIVITY                   | -1.25 | 0.72 | 0 | 0 | 0 | not significant |
| 2095 | GO_NEGATIVE_REGULATION_OF_TELOMERE_MAINTENANCE_VIA_TELOMERASE      | -1.25 | 0.72 | 0 | 0 | 0 | not significant |
| 2096 | REACTOME_FORMATION_OF_SENESCENCE_ASSOCIATED_HETEROCHROMATIN_FC     | -1.25 | 0.72 | 0 | 0 | 0 | not significant |
| 2097 | GO_POSITIVE_REGULATION_OF_EPIDERMAL_CELL_DIFFERENTIATION           | -1.25 | 0.7  | 0 | 0 | 0 | not significant |
| 2098 | GO_POSITIVE_REGULATION_OF_MRNA_SPLICING_VIA_SPLICEOSOME            | -1.25 | 0.7  | 0 | 0 | 0 | not significant |
| 2099 | GO_RESPONSE_TO_COCAINE                                             | -1.25 | 0.7  | 0 | 0 | 0 | not significant |
| 2100 | GO_U4_SNRNP                                                        | -1.25 | 0.7  | 0 | 0 | 0 | not significant |
| 2101 | GO_REGULATION_OF_ISOMERASE_ACTIVITY                                | -1.25 | 0.69 | 0 | 0 | 0 | not significant |
| 2102 | REACTOME_TRAFFICKING_OF_GLR2_CONTAINING_AMPA_RECEPTORS             | -1.25 | 0.69 | 0 | 0 | 0 | not significant |
| 2103 | LOPEZ_MESOTHELIOMA_SURVIVAL_WORST_VS_BEST_UP                       | -1.25 | 0.68 | 0 | 0 | 0 | not significant |
| 2104 | REACTOME_G_PROTEIN_GATED_POTASSIUM_CHANNELS                        | -1.25 | 0.68 | 0 | 0 | 0 | not significant |
| 2105 | REACTOME_SYNTHESIS_OF_PIP3_AT_THE_LATE_ENDOSOME_MEMBRANE           | -1.25 | 0.68 | 0 | 0 | 0 | not significant |
| 2106 | CHR2Q13                                                            | -1.25 | 0.67 | 0 | 0 | 0 | not significant |
| 2107 | GO_U7_SNRNP                                                        | -1.25 | 0.67 | 0 | 0 | 0 | not significant |
| 2108 | REACTOME_DNA_DAMAGE_REVERSAL                                       | -1.25 | 0.67 | 0 | 0 | 0 | not significant |
| 2109 | GO_5S_RRNA_BINDING                                                 | -1.25 | 0.66 | 0 | 0 | 0 | not significant |
| 2110 | GO_FOREBRAIN_NEUROBLAST_DIVISION                                   | -1.25 | 0.66 | 0 | 0 | 0 | not significant |
| 2111 | GO_INTERLEUKIN_18_PRODUCTION                                       | -1.25 | 0.66 | 0 | 0 | 0 | not significant |
| 2112 | IVANOVA_HEMATOPOIESIS_STEM_CELL_SHORT_TERM                         | -1.25 | 0.66 | 0 | 0 | 0 | not significant |
| 2113 | GO_OXIDOREDUCTASE_ACTIVITY_ACTING_ON_A_SULFUR_GROUP_OF_DONORS_N    | -1.25 | 0.65 | 0 | 0 | 0 | not significant |
| 2114 | REACTOME_PL_3K_CASCADE_FGFR4                                       | -1.25 | 0.65 | 0 | 0 | 0 | not significant |
| 2115 | REACTOME_SYNTHESIS_OF_PYROPHOSPHATES_IN_THE_CYTOSOL                | -1.25 | 0.64 | 0 | 0 | 0 | not significant |
| 2116 | GO_CHEMOKINE_C_C_MOTIF_LIGAND_2_SECRETION                          | -1.25 | 0.63 | 0 | 0 | 0 | not significant |
| 2117 | GO_GLYCEROL_ETHER_BIOSYNTHETIC_PROCESS                             | -1.25 | 0.62 | 0 | 0 | 0 | not significant |
| 2118 | GO_P_P_BOND_HYDROLYSIS_DRIVEN_PROTEIN_TRANSMEMBRANE_TRANPORTEF     | -1.25 | 0.61 | 0 | 0 | 0 | not significant |
| 2119 | GO_PROTEIN_MODIFICATION_BY_SMALL_PROTEIN_CONJUGATION               | -1.24 | 4    | 0 | 0 | 0 | not significant |
| 2120 | GO_PROTEIN_MODIFICATION_BY_SMALL_PROTEIN_CONJUGATION_OR_REMOVAL    | -1.24 | 4    | 0 | 0 | 0 | not significant |
| 2121 | GO_NUCLEAR_SPECK                                                   | -1.24 | 2.22 | 0 | 0 | 0 | not significant |
| 2122 | GO_REGULATION_OF_CELLULAR_CATABOLIC_PROCESS                        | -1.24 | 2    | 0 | 0 | 0 | not significant |
| 2123 | GO_POSITIVE_REGULATION_OF_TRANSFERASE_ACTIVITY                     | -1.24 | 1.8  | 0 | 0 | 0 | not significant |
| 2124 | GO_REGULATION_OF_PROTEIN_CATABOLIC_PROCESS                         | -1.24 | 1.57 | 0 | 0 | 0 | not significant |
| 2125 | GAL_LEUKEMIC_STEM_CELL_DN                                          | -1.24 | 1.34 | 0 | 0 | 0 | not significant |
| 2126 | GO_TELENCEPHALON_DEVELOPMENT                                       | -1.24 | 1.25 | 0 | 0 | 0 | not significant |
| 2127 | REACTOME_INFLUENZA_INFECTION                                       | -1.24 | 1.24 | 0 | 0 | 0 | not significant |
| 2128 | GO_CULLIN_RING_UBIQUITIN_LIGASE_COMPLEX                            | -1.24 | 1.14 | 0 | 0 | 0 | not significant |
| 2129 | KEGG_INSULIN_SIGNALING_PATHWAY                                     | -1.24 | 1.12 | 0 | 0 | 0 | not significant |
| 2130 | HIRSCH_CELLULAR_TRANSFORMATION_SIGNATURE_DN                        | -1.24 | 1.01 | 0 | 0 | 0 | not significant |
| 2131 | LINDGREN_BLADDER_CANCER_WITH_LOH_IN_CHR9Q                          | -1.24 | 1    | 0 | 0 | 0 | not significant |
| 2132 | KEGG_VASCULAR_SMOOTH_MUSCLE_CONTRACTION                            | -1.24 | 0.98 | 0 | 0 | 0 | not significant |
| 2133 | KOKKINAKIS_METHIONINE_DEPRIVATION_96HR_DN                          | -1.24 | 0.95 | 0 | 0 | 0 | not significant |
| 2134 | GO_PLATELET_DERIVED_GROWTH_FACTOR_RECEPTOR_SIGNALING_PATHWAY       | -1.24 | 0.88 | 0 | 0 | 0 | not significant |
| 2135 | GO_MITOTIC_CYTOKINESIS                                             | -1.24 | 0.87 | 0 | 0 | 0 | not significant |
| 2136 | GO_AXIS_SPECIFICATION                                              | -1.24 | 0.86 | 0 | 0 | 0 | not significant |
| 2137 | ZHANG_RESPONSE_TO_CANTHARIDIN_DN                                   | -1.24 | 0.85 | 0 | 0 | 0 | not significant |
| 2138 | GO_ENDONUCLEASE_ACTIVITY_ACTIVE_WITH_EITHER_RIBO_OR_DEOXYRIBONUCLI | -1.24 | 0.84 | 0 | 0 | 0 | not significant |
| 2139 | REACTOME_CYTOSOLIC_SENSORS_OF_PATHOGEN_ASSOCIATED_DNA              | -1.24 | 0.84 | 0 | 0 | 0 | not significant |
| 2140 | GO_POSITIVE_REGULATION_OF_TELOMERE_MAINTENANCE_VIA_TELOMERE LENG   | -1.24 | 0.82 | 0 | 0 | 0 | not significant |
| 2141 | GO_PYRIMIDINE_NUCLEOTIDE_BIOSYNTHETIC_PROCESS                      | -1.24 | 0.8  | 0 | 0 | 0 | not significant |
| 2142 | TOMLINS_PROSTATE_CANCER_DN                                         | -1.24 | 0.8  | 0 | 0 | 0 | not significant |
| 2143 | GO_NEGATIVE_REGULATION_OF_PROTEIN_LOCALIZATION_TO_CELL_PERIPHERY   | -1.24 | 0.78 | 0 | 0 | 0 | not significant |
| 2144 | AMIT_SERUM_RESPONSE_480_MCF10A                                     | -1.24 | 0.76 | 0 | 0 | 0 | not significant |
| 2145 | REACTOME_VASOPRESSIN_REGULATES_RENAL_WATER_HOMEOSTASIS_VIA_AQUIF   | -1.24 | 0.76 | 0 | 0 | 0 | not significant |
| 2146 | GO_RIBOSOMAL_SMALL_SUBUNIT_ASSEMBLY                                | -1.24 | 0.75 | 0 | 0 | 0 | not significant |
| 2147 | JAZAG_TGFB1_SIGNALING_DN                                           | -1.24 | 0.75 | 0 | 0 | 0 | not significant |
| 2148 | REACTOME_SUMOYLATION_OF_INTRACELLULAR_RECEPTORS                    | -1.24 | 0.73 | 0 | 0 | 0 | not significant |
| 2149 | GO_POLARIZED_EPITHELIAL_CELL_DIFFERENTIATION                       | -1.24 | 0.72 | 0 | 0 | 0 | not significant |
| 2150 | HOFMANN_MYELODYSPLASTIC_SYNDROM_LOW_RISK_DN                        | -1.24 | 0.72 | 0 | 0 | 0 | not significant |
| 2151 | GO_HINDLIMB_MORPHOGENESIS                                          | -1.24 | 0.71 | 0 | 0 | 0 | not significant |
| 2152 | GO_METANEPHROS_MORPHOGENESIS                                       | -1.24 | 0.71 | 0 | 0 | 0 | not significant |
| 2153 | AMIT_SERUM_RESPONSE_20_MCF10A                                      | -1.24 | 0.69 | 0 | 0 | 0 | not significant |
| 2154 | GO_MITOCHONDRION_MORPHOGENESIS                                     | -1.24 | 0.69 | 0 | 0 | 0 | not significant |
| 2155 | GO_REGULATION_OF_PSEUDOPODIUM_ASSEMBLY                             | -1.24 | 0.69 | 0 | 0 | 0 | not significant |
| 2156 | GO_REPRODUCTIVE_BEHAVIOR                                           | -1.24 | 0.69 | 0 | 0 | 0 | not significant |
| 2157 | GO_RESPONSE_TO_PROSTAGLANDIN                                       | -1.24 | 0.69 | 0 | 0 | 0 | not significant |
| 2158 | KYNG_ENVIRONMENTAL_STRESS_RESPONSE_DN                              | -1.24 | 0.69 | 0 | 0 | 0 | not significant |
| 2159 | REACTOME_ESTROGEN_STIMULATED_SIGNALING_THROUGH_PRKCS               | -1.24 | 0.69 | 0 | 0 | 0 | not significant |
| 2160 | REACTOME_G_PROTEIN_ACTIVATION                                      | -1.24 | 0.69 | 0 | 0 | 0 | not significant |
| 2161 | GO_PROTEIN_KINASE_B_BINDING                                        | -1.24 | 0.68 | 0 | 0 | 0 | not significant |
| 2162 | GO_AMINOACYL_TRNA_EDITING_ACTIVITY                                 | -1.24 | 0.67 | 0 | 0 | 0 | not significant |
| 2163 | GO_PEPTIDE_HORMONE_RECEPTOR_BINDING                                | -1.24 | 0.67 | 0 | 0 | 0 | not significant |
| 2164 | GO_MITOCHONDRIAL_ELECTRON_TRANSPORT_UBIQUINOL_TO_CYTOCHROME_C      | -1.24 | 0.66 | 0 | 0 | 0 | not significant |
| 2165 | GO_REGULATION_OF_PLASMA_MEMBRANE_ORGANIZATION                      | -1.24 | 0.66 | 0 | 0 | 0 | not significant |
| 2166 | GO_FASCIA_ADHERENS                                                 | -1.24 | 0.65 | 0 | 0 | 0 | not significant |
| 2167 | GO_LOW_DENSITY_LIPOPROTEIN_PARTICLE_RECEPTOR_BINDING               | -1.24 | 0.65 | 0 | 0 | 0 | not significant |
| 2168 | GO_MITOCHONDRIAL_RNA_CATABOLIC_PROCESS                             | -1.24 | 0.65 | 0 | 0 | 0 | not significant |



|      |                                                                    |       |      |   |   |   |                 |
|------|--------------------------------------------------------------------|-------|------|---|---|---|-----------------|
| 2169 | GO_NEGATIVE_REGULATION_OF_DENDRITIC_SPINE_DEVELOPMENT              | -1.24 | 0.65 | 0 | 0 | 0 | not significant |
| 2170 | REACTOME_LRRF1_INTERACTING_PROTEIN_1_LRRFIP1_ACTIVATES_TYPE_1_IFN  | -1.24 | 0.65 | 0 | 0 | 0 | not significant |
| 2171 | REACTOME_RHO_GTPASES_ACTIVATE_KTN1                                 | -1.24 | 0.65 | 0 | 0 | 0 | not significant |
| 2172 | REACTOME_SHC_MEDIATED_CASCADE:FGFR2                                | -1.24 | 0.65 | 0 | 0 | 0 | not significant |
| 2173 | REACTOME_SLPB_DEPENDENT_PROCESSING_OF_REPLICATION_DEPENDENT_HIST   | -1.24 | 0.65 | 0 | 0 | 0 | not significant |
| 2174 | GO_BENZENE_CONTAINING_COMPOUND_METABOLIC_PROCESS                   | -1.24 | 0.64 | 0 | 0 | 0 | not significant |
| 2175 | GO_SERINE_PHOSPHORYLATION_OF_STAT_PROTEIN                          | -1.24 | 0.64 | 0 | 0 | 0 | not significant |
| 2176 | GO_NEGATIVE_REGULATION_OF_PLATELET_ACTIVATION                      | -1.24 | 0.63 | 0 | 0 | 0 | not significant |
| 2177 | GO_NUCLEAR_PORE_NUCLEAR_BASKET                                     | -1.24 | 0.63 | 0 | 0 | 0 | not significant |
| 2178 | GO_POSITIVE_REGULATION_OF_MITOCHONDRIAL_MEMBRANE_POTENTIAL         | -1.24 | 0.63 | 0 | 0 | 0 | not significant |
| 2179 | REACTOME_SHC_MEDIATED_CASCADE:FGFR3                                | -1.24 | 0.62 | 0 | 0 | 0 | not significant |
| 2180 | SCHMAHL_PDGF_SIGNALING                                             | -1.24 | 0.62 | 0 | 0 | 0 | not significant |
| 2181 | GO_CELLULAR_RESPONSE_TO_NICOTINE                                   | -1.24 | 0.6  | 0 | 0 | 0 | not significant |
| 2182 | GO_POSITIVE_REGULATION_OF_FIBROBLAST_GROWTH_FACTOR_RECEPTOR_SIG    | -1.24 | 0.6  | 0 | 0 | 0 | not significant |
| 2183 | GO_CLATHRIN_LIGHT_CHAIN_BINDING                                    | -1.24 | 0.58 | 0 | 0 | 0 | not significant |
| 2184 | GO_CYTOSKELETAL_PROTEIN_BINDING                                    | -1.23 | 4    | 0 | 0 | 0 | not significant |
| 2185 | GRAESSMANN_RESPONSE_TO_MC_AND_DOXORUBICIN_DN                       | -1.23 | 1.86 | 0 | 0 | 0 | not significant |
| 2186 | GO_REGULATION_OF_CATABOLIC_PROCESS                                 | -1.23 | 1.8  | 0 | 0 | 0 | not significant |
| 2187 | GO_REGULATION_OF_WNT_SIGNALING_PATHWAY                             | -1.23 | 1.52 | 0 | 0 | 0 | not significant |
| 2188 | GO_CELLULAR_KETONE_METABOLIC_PROCESS                               | -1.23 | 1.39 | 0 | 0 | 0 | not significant |
| 2189 | SHETH_LIVER_CANCER_VS_TXNIP_LOSS_PAM1                              | -1.23 | 1.31 | 0 | 0 | 0 | not significant |
| 2190 | MCBRYAN_PUBERTAL_BREAST_6_7WK_UP                                   | -1.23 | 1.19 | 0 | 0 | 0 | not significant |
| 2191 | GO_MESENCHYME_DEVELOPMENT                                          | -1.23 | 1.14 | 0 | 0 | 0 | not significant |
| 2192 | GO_OSTEOBLAST_DIFFERENTIATION                                      | -1.23 | 1.08 | 0 | 0 | 0 | not significant |
| 2193 | GO_MICROTUBULE_POLYMERIZATION_OR_DEPOLYMERIZATION                  | -1.23 | 0.99 | 0 | 0 | 0 | not significant |
| 2194 | GO_EPITHELIAL_TO_MESENCHYMAL_TRANSITION                            | -1.23 | 0.94 | 0 | 0 | 0 | not significant |
| 2195 | GO_NEGATIVE_REGULATION_OF_LEUKOCYTE_DIFFERENTIATION                | -1.23 | 0.9  | 0 | 0 | 0 | not significant |
| 2196 | BROWNE_HCMV_INFECTION_4HR_UP                                       | -1.23 | 0.88 | 0 | 0 | 0 | not significant |
| 2197 | GO_CARDIAC_CONDUCTION                                              | -1.23 | 0.88 | 0 | 0 | 0 | not significant |
| 2198 | GO_POSITIVE_REGULATION_OF_SMOOTH_MUSCLE_CELL_PROLIFERATION         | -1.23 | 0.85 | 0 | 0 | 0 | not significant |
| 2199 | NAKAMURA_METASTASIS                                                | -1.23 | 0.84 | 0 | 0 | 0 | not significant |
| 2200 | HJ_ANGIOGENESIS_DN                                                 | -1.23 | 0.81 | 0 | 0 | 0 | not significant |
| 2201 | SIG_INSULIN_RECEPTOR_PATHWAY_IN_CARDIAC_MYOCYTES                   | -1.23 | 0.81 | 0 | 0 | 0 | not significant |
| 2202 | GO_ARTERY_MORPHOGENESIS                                            | -1.23 | 0.79 | 0 | 0 | 0 | not significant |
| 2203 | ZHAN_MULTIPLE_MYELOMA_SUBGROUPS                                    | -1.23 | 0.78 | 0 | 0 | 0 | not significant |
| 2204 | GO_INTRINSIC_COMPONENT_OF_MITOCHONDRIAL_INNER_MEMBRANE             | -1.23 | 0.77 | 0 | 0 | 0 | not significant |
| 2205 | GO_CILIARY_BASE                                                    | -1.23 | 0.74 | 0 | 0 | 0 | not significant |
| 2206 | GO_COP9_SIGNALOSOME                                                | -1.23 | 0.74 | 0 | 0 | 0 | not significant |
| 2207 | REACTOME_MITOCHONDRIAL_CALCIIUM_ION_TRANSPORT                      | -1.23 | 0.73 | 0 | 0 | 0 | not significant |
| 2208 | GO_MONOCARBOXYLIC_ACID_BINDING                                     | -1.23 | 0.72 | 0 | 0 | 0 | not significant |
| 2209 | BIOCARTA_GCR_PATHWAY                                               | -1.23 | 0.7  | 0 | 0 | 0 | not significant |
| 2210 | GO_INTRINSIC_COMPONENT_OF_MITOCHONDRIAL_OUTER_MEMBRANE             | -1.23 | 0.7  | 0 | 0 | 0 | not significant |
| 2211 | GO_MAINTENANCE_OF_CELL_POLARITY                                    | -1.23 | 0.7  | 0 | 0 | 0 | not significant |
| 2212 | GO_MEMBRANE_FISSION                                                | -1.23 | 0.69 | 0 | 0 | 0 | not significant |
| 2213 | GO_REGULATION_OF_OLIGODENDROCYTE_DIFFERENTIATION                   | -1.23 | 0.69 | 0 | 0 | 0 | not significant |
| 2214 | ROVERSI_GLIOMA_LOH_REGIONS                                         | -1.23 | 0.69 | 0 | 0 | 0 | not significant |
| 2215 | HALLMARK_NOTCH_SIGNALING                                           | -1.23 | 0.68 | 0 | 0 | 0 | not significant |
| 2216 | GO_AMINOACYL_TRNA_METABOLISM_INVOLVED_IN_TRANSLATIONAL_FIDELITY    | -1.23 | 0.67 | 0 | 0 | 0 | not significant |
| 2217 | GO_METANEPHRIC_NEPHRON_MORPHOGENESIS                               | -1.23 | 0.67 | 0 | 0 | 0 | not significant |
| 2218 | GO_PLUS_END_DIRECTED_ORGANELLE_TRANSPORT_ALONG_MICROTUBULE         | -1.23 | 0.67 | 0 | 0 | 0 | not significant |
| 2219 | GO_RETINOIC_ACID_RECEPTOR_BINDING                                  | -1.23 | 0.67 | 0 | 0 | 0 | not significant |
| 2220 | GO_NEGATIVE_REGULATION_OF_PEPTIDYL_THREONINE_PHOSPHORYLATION       | -1.23 | 0.66 | 0 | 0 | 0 | not significant |
| 2221 | GO_MITOCHONDRIAL_RIBOSOME_ASSEMBLY                                 | -1.23 | 0.65 | 0 | 0 | 0 | not significant |
| 2222 | GO_SULFUR_AMINO_ACID_METABOLIC_PROCESS                             | -1.23 | 0.65 | 0 | 0 | 0 | not significant |
| 2223 | GO_TRNA_SPECIFIC_RIBONUCLEASE_ACTIVITY                             | -1.23 | 0.65 | 0 | 0 | 0 | not significant |
| 2224 | MASRI_RESISTANCE_TO_TAMOXIFEN_AND_AROMATASE_INHIBITORS_UP          | -1.23 | 0.65 | 0 | 0 | 0 | not significant |
| 2225 | REACTOME_GLYCOGEN_BREAKDOWN_GLYCOGENOLYSIS                         | -1.23 | 0.65 | 0 | 0 | 0 | not significant |
| 2226 | BRUNEAU_SEPTATION_VENTRICULAR                                      | -1.23 | 0.64 | 0 | 0 | 0 | not significant |
| 2227 | EHRlich_ICF_SYNDROM_UP                                             | -1.23 | 0.64 | 0 | 0 | 0 | not significant |
| 2228 | GO_ASTER                                                           | -1.23 | 0.64 | 0 | 0 | 0 | not significant |
| 2229 | GO_CYTOPLASM_ORGANIZATION                                          | -1.23 | 0.64 | 0 | 0 | 0 | not significant |
| 2230 | GO_POSITIVE_REGULATION_OF_MYELINATION                              | -1.23 | 0.64 | 0 | 0 | 0 | not significant |
| 2231 | GO_5_3_EXODEOXYRIBONUCLEASE_ACTIVITY                               | -1.23 | 0.63 | 0 | 0 | 0 | not significant |
| 2232 | GO_ENOYL_COA_HYDRATASE_ACTIVITY                                    | -1.23 | 0.63 | 0 | 0 | 0 | not significant |
| 2233 | GO_TPR_DOMAIN_BINDING                                              | -1.23 | 0.63 | 0 | 0 | 0 | not significant |
| 2234 | LUND_SILENCED_BY_METHYLATION                                       | -1.23 | 0.63 | 0 | 0 | 0 | not significant |
| 2235 | REACTOME_CREB1_PHOSPHORYLATION_THROUGH_THE_ACTIVATION_OF_CAMKII    | -1.23 | 0.63 | 0 | 0 | 0 | not significant |
| 2236 | GO_ACTOMYOSIN_CONTRACTILE_RING_ORGANIZATION                        | -1.23 | 0.62 | 0 | 0 | 0 | not significant |
| 2237 | GO_POSITIVE_REGULATION_OF_HISTONE_UBIQUITINATION                   | -1.23 | 0.62 | 0 | 0 | 0 | not significant |
| 2238 | REACTOME_ACTIVATED_NTRK2_SIGNALS_THROUGH_RAS                       | -1.23 | 0.61 | 0 | 0 | 0 | not significant |
| 2239 | REACTOME_CAMK_IV_MEDIATED_PHOSPHORYLATION_OF_CREB                  | -1.23 | 0.61 | 0 | 0 | 0 | not significant |
| 2240 | GALI_TP53_TARGETS_APOPTIC_DN                                       | -1.23 | 0.6  | 0 | 0 | 0 | not significant |
| 2241 | GO_RNA_POLYMERASE_III_TYPE_3_PROMOTER_DNA_BINDING                  | -1.23 | 0.6  | 0 | 0 | 0 | not significant |
| 2242 | KEGG_LIMONENE_AND_PINENE_DEGRADATION                               | -1.23 | 0.6  | 0 | 0 | 0 | not significant |
| 2243 | REACTOME_INACTIVATION_OF_CDC42_AND_RAC1                            | -1.23 | 0.59 | 0 | 0 | 0 | not significant |
| 2244 | GO_PHOSPHATIDYLINOSITOL_3_KINASE_REGULATORY_SUBUNIT_BINDING        | -1.23 | 0.58 | 0 | 0 | 0 | not significant |
| 2245 | GO_PROTEIN_LOCALIZATION_TO_ORGANELLE                               | -1.22 | 4    | 0 | 0 | 0 | not significant |
| 2246 | GO_CENTROSOME                                                      | -1.22 | 1.82 | 0 | 0 | 0 | not significant |
| 2247 | SCHAEFFER_PROSTATE_DEVELOPMENT_6HR_DN                              | -1.22 | 1.66 | 0 | 0 | 0 | not significant |
| 2248 | MOOTHA_PGC                                                         | -1.22 | 1.57 | 0 | 0 | 0 | not significant |
| 2249 | SENGUPTA_NASOPHARYNGEAL_CARCINOMA_WITH_LMP1_UP                     | -1.22 | 1.39 | 0 | 0 | 0 | not significant |
| 2250 | KEGG_HUNTINGTONS_DISEASE                                           | -1.22 | 1.16 | 0 | 0 | 0 | not significant |
| 2251 | GO_S_ADENOSYLMETHIONINE_DEPENDENT_METHYLTRANSFERASE_ACTIVITY       | -1.22 | 1.1  | 0 | 0 | 0 | not significant |
| 2252 | GO_FC_RECEPTOR_SIGNALING_PATHWAY                                   | -1.22 | 1.03 | 0 | 0 | 0 | not significant |
| 2253 | GO_MAGNESIUM_ION_BINDING                                           | -1.22 | 1.02 | 0 | 0 | 0 | not significant |
| 2254 | GO_ORGAN_GROWTH                                                    | -1.22 | 0.96 | 0 | 0 | 0 | not significant |
| 2255 | GO_REGENERATION                                                    | -1.22 | 0.95 | 0 | 0 | 0 | not significant |
| 2256 | GO_RNA_PHOSPHODIESTER_BOND_HYDROLYSIS_ENDONUCLEOLYTIC              | -1.22 | 0.91 | 0 | 0 | 0 | not significant |
| 2257 | DURCHDEWALD_SKIN_CARCINOGENESIS_UP                                 | -1.22 | 0.89 | 0 | 0 | 0 | not significant |
| 2258 | JAIN_NFKB_SIGNALING                                                | -1.22 | 0.84 | 0 | 0 | 0 | not significant |
| 2259 | REACTOME_COSTIMULATION_BY_THE_CD28_FAMILY                          | -1.22 | 0.84 | 0 | 0 | 0 | not significant |
| 2260 | REACTOME_SIGNALING_BY_RAS_MUTANTS                                  | -1.22 | 0.84 | 0 | 0 | 0 | not significant |
| 2261 | WANG_PROSTATE_CANCER_ANDROGEN_INDEPENDENT                          | -1.22 | 0.82 | 0 | 0 | 0 | not significant |
| 2262 | MODY_HIPPOCAMPUS_PRENATAL                                          | -1.22 | 0.81 | 0 | 0 | 0 | not significant |
| 2263 | REACTOME_PYRUVATE_METABOLISM_AND_CITRIC_ACID_TCA_CYCLE             | -1.22 | 0.79 | 0 | 0 | 0 | not significant |
| 2264 | GO_NEGATIVE_REGULATION_OF_UBIQUITIN_DEPENDENT_PROTEIN_CATABOLIC_PF | -1.22 | 0.78 | 0 | 0 | 0 | not significant |
| 2265 | CHR5Q23                                                            | -1.22 | 0.76 | 0 | 0 | 0 | not significant |
| 2266 | APPIERTO_RESPONSE_TO_FENRETINIDE_UP                                | -1.22 | 0.75 | 0 | 0 | 0 | not significant |
| 2267 | GO_RESPIRATORY_CHAIN_COMPLEX_IV_ASSEMBLY                           | -1.22 | 0.74 | 0 | 0 | 0 | not significant |
| 2268 | REACTOME_SPRY_REGULATION_OF_FGF_SIGNALING                          | -1.22 | 0.72 | 0 | 0 | 0 | not significant |
| 2269 | GO_POLY_PURINE_TRACT_BINDING                                       | -1.22 | 0.71 | 0 | 0 | 0 | not significant |
| 2270 | HOQUE_METHYLATED_IN_CANCER                                         | -1.22 | 0.7  | 0 | 0 | 0 | not significant |
| 2271 | STAMBOLSKY_TARGETS_OF_MUTATED_TP53_UP                              | -1.22 | 0.69 | 0 | 0 | 0 | not significant |
| 2272 | BIOCARTA_LONGEVITY_PATHWAY                                         | -1.22 | 0.68 | 0 | 0 | 0 | not significant |
| 2273 | GO_LIPOPROTEIN_PARTICLE_RECEPTOR_BINDING                           | -1.22 | 0.68 | 0 | 0 | 0 | not significant |
| 2274 | GO_REGULATION_OF_OXIDATIVE_PHOSPHORYLATION                         | -1.22 | 0.67 | 0 | 0 | 0 | not significant |
| 2275 | ABRAHAM_ALPC_VS_MULTIPLE_MYELOMA_DN                                | -1.22 | 0.66 | 0 | 0 | 0 | not significant |
| 2276 | GO_CHANNEL_INHIBITOR_ACTIVITY                                      | -1.22 | 0.66 | 0 | 0 | 0 | not significant |
| 2277 | GO_CYTOSKELETAL_ADAPTOR_ACTIVITY                                   | -1.22 | 0.66 | 0 | 0 | 0 | not significant |

|      |                                                                    |       |      |   |   |   |                 |
|------|--------------------------------------------------------------------|-------|------|---|---|---|-----------------|
| 2278 | GO_PROTEIN_DENEDDYLATION                                           | -1.22 | 0.66 | 0 | 0 | 0 | not significant |
| 2279 | GO_VENTRICULAR TRABECULA_MYOCARDIUM_MORPHOGENESIS                  | -1.22 | 0.66 | 0 | 0 | 0 | not significant |
| 2280 | REACTOME_DEFECTS_IN_BIOTIN_BTN_METABOLISM                          | -1.22 | 0.66 | 0 | 0 | 0 | not significant |
| 2281 | GO_CELLULAR_RESPONSE_TO_NITRIC_OXIDE                               | -1.22 | 0.65 | 0 | 0 | 0 | not significant |
| 2282 | WU_HBX_TARGETS_1_DN                                                | -1.22 | 0.65 | 0 | 0 | 0 | not significant |
| 2283 | REACTOME_GLYCAGON_SIGNALING_IN_METABOLIC_REGULATION                | -1.22 | 0.64 | 0 | 0 | 0 | not significant |
| 2284 | GO_GERM_CELL_PROLIFERATION                                         | -1.22 | 0.63 | 0 | 0 | 0 | not significant |
| 2285 | GO_LIGASE_ACTIVITY_FORMING_CARBON_CARBON_BONDS                     | -1.22 | 0.63 | 0 | 0 | 0 | not significant |
| 2286 | GO_NUCLEOLAR_LARGE_RRNA_TRANSCRIPTION_BY_RNA_POLYMERASE_I          | -1.22 | 0.63 | 0 | 0 | 0 | not significant |
| 2287 | GO_POSITIVE_REGULATION_OF_SMAD_PROTEIN_SIGNAL_TRANSDUCTION         | -1.22 | 0.63 | 0 | 0 | 0 | not significant |
| 2288 | GO_CADHERIN_BINDING_INVOLVED_IN_CELL_CELL_ADHESION                 | -1.22 | 0.62 | 0 | 0 | 0 | not significant |
| 2289 | GO_KINETOCHORE_MICROTUBULE                                         | -1.22 | 0.62 | 0 | 0 | 0 | not significant |
| 2290 | GO_MITOCHONDRIAL_DNA_REPLICATION                                   | -1.22 | 0.62 | 0 | 0 | 0 | not significant |
| 2291 | GO_PEPTIDYL_ARGININE_METHYLATION                                   | -1.22 | 0.62 | 0 | 0 | 0 | not significant |
| 2292 | GO_POSTSYNAPTIC_SIGNAL_TRANSDUCTION                                | -1.22 | 0.62 | 0 | 0 | 0 | not significant |
| 2293 | REACTOME_RESPONSE_TO_METAL_IONS                                    | -1.22 | 0.62 | 0 | 0 | 0 | not significant |
| 2294 | GO_INOSITOL_TRISPHOSPHATE_KINASE_ACTIVITY                          | -1.22 | 0.61 | 0 | 0 | 0 | not significant |
| 2295 | WAGNER_APO2_SENSITIVITY                                            | -1.22 | 0.61 | 0 | 0 | 0 | not significant |
| 2296 | GO_PRIMARY_AMINO_COMPOUND_METABOLIC_PROCESS                        | -1.22 | 0.6  | 0 | 0 | 0 | not significant |
| 2297 | GO_MECHANOSENSORY_BEHAVIOR                                         | -1.22 | 0.59 | 0 | 0 | 0 | not significant |
| 2298 | GO_NEGATIVE_REGULATION_OF_EXECUTION_PHASE_OF_APOPTOSIS             | -1.22 | 0.59 | 0 | 0 | 0 | not significant |
| 2299 | GO_CORE_MEDIATOR_COMPLEX                                           | -1.22 | 0.58 | 0 | 0 | 0 | not significant |
| 2300 | VICENT_METASTASIS_UP                                               | -1.22 | 0.58 | 0 | 0 | 0 | not significant |
| 2301 | GO_PHOSPHATIDYLINOSITOL_3_5_BISPHOSPHATE_3_PHOSPHATASE_ACTIVITY    | -1.22 | 0.57 | 0 | 0 | 0 | not significant |
| 2302 | GO_LIPID_KINASE_ACTIVITY                                           | -1.22 | 0.55 | 0 | 0 | 0 | not significant |
| 2303 | GO_MITOCHONDRIAL_PART                                              | -1.21 | 4    | 0 | 0 | 0 | not significant |
| 2304 | GO_REGULATION_OF_CELLULAR_COMPONENT_BIOGENESIS                     | -1.21 | 4    | 0 | 0 | 0 | not significant |
| 2305 | PILON_KLF1_TARGETS_DN                                              | -1.21 | 4    | 0 | 0 | 0 | not significant |
| 2306 | REACTOME_VESICLE_MEDIATED_TRANSPORT                                | -1.21 | 2.04 | 0 | 0 | 0 | not significant |
| 2307 | GO_RESPONSE_TO_OXYGEN_LEVELS                                       | -1.21 | 1.53 | 0 | 0 | 0 | not significant |
| 2308 | MOOHA_HUMAN_MITODB_6_2002                                          | -1.21 | 1.53 | 0 | 0 | 0 | not significant |
| 2309 | GO_RESPONSE_TO_TEMPERATURE_STIMULUS                                | -1.21 | 1.38 | 0 | 0 | 0 | not significant |
| 2310 | CREIGHTON_ENDOCRINE_THERAPY_RESISTANCE_4                           | -1.21 | 1.26 | 0 | 0 | 0 | not significant |
| 2311 | GO_CELLULAR_RESPIRATION                                            | -1.21 | 1.22 | 0 | 0 | 0 | not significant |
| 2312 | PGF_UP_V1_UP                                                       | -1.21 | 1.18 | 0 | 0 | 0 | not significant |
| 2313 | GO_CHROMATIN_ASSEMBLY_OR_DISASSEMBLY                               | -1.21 | 1.17 | 0 | 0 | 0 | not significant |
| 2314 | GO_ENDOPLASMIC_RETICULUM_TO_GOLGI_VESICLE_MEDIATED_TRANSPORT       | -1.21 | 1.06 | 0 | 0 | 0 | not significant |
| 2315 | GO_RNA_PHOSPHODIESTER_BOND_HYDROLYSIS                              | -1.21 | 1.04 | 0 | 0 | 0 | not significant |
| 2316 | XU_GHI_AUTOCRINE_TARGETS_DN                                        | -1.21 | 0.96 | 0 | 0 | 0 | not significant |
| 2317 | RIGGI_EWING_SARCOMA_PROGENITOR_DN                                  | -1.21 | 0.95 | 0 | 0 | 0 | not significant |
| 2318 | DOANE_RESPONSE_TO_ANDROGEN_UP                                      | -1.21 | 0.94 | 0 | 0 | 0 | not significant |
| 2319 | GO_REGULATION_OF_CELLULAR_KETONE_METABOLIC_PROCESS                 | -1.21 | 0.92 | 0 | 0 | 0 | not significant |
| 2320 | KEGG_WNT_SIGNALING_PATHWAY                                         | -1.21 | 0.91 | 0 | 0 | 0 | not significant |
| 2321 | REACTOME_SIGNALING_BY_NTRK1_TRKA                                   | -1.21 | 0.9  | 0 | 0 | 0 | not significant |
| 2322 | GO_NUCLEOSOMAL_DNA_BINDING                                         | -1.21 | 0.89 | 0 | 0 | 0 | not significant |
| 2323 | GO_POLYSOME                                                        | -1.21 | 0.89 | 0 | 0 | 0 | not significant |
| 2324 | GO_CIRCADIAN_REGULATION_OF_GENE_EXPRESSION                         | -1.21 | 0.82 | 0 | 0 | 0 | not significant |
| 2325 | GO_ORGANELLE_TRANSPORT_ALONG_MICROTUBULE                           | -1.21 | 0.82 | 0 | 0 | 0 | not significant |
| 2326 | GO_RESPONSE_TO_NERVE_GROWTH_FACTOR                                 | -1.21 | 0.82 | 0 | 0 | 0 | not significant |
| 2327 | GALE_APL_WITH_FLT3_MUTATED_UP                                      | -1.21 | 0.81 | 0 | 0 | 0 | not significant |
| 2328 | GO_REGULATION_OF_GLIAL_CELL_DIFFERENTIATION                        | -1.21 | 0.79 | 0 | 0 | 0 | not significant |
| 2329 | GO_REGULATION_OF_HEART_RATE                                        | -1.21 | 0.76 | 0 | 0 | 0 | not significant |
| 2330 | GO_NUCLEOID                                                        | -1.21 | 0.75 | 0 | 0 | 0 | not significant |
| 2331 | GO_ARTERY_DEVELOPMENT                                              | -1.21 | 0.74 | 0 | 0 | 0 | not significant |
| 2332 | GO_CARDIAC_MUSCLE_TISSUE_MORPHOGENESIS                             | -1.21 | 0.74 | 0 | 0 | 0 | not significant |
| 2333 | CAFFAREL_RESPONSE_TO_THC_24HR_5_UP                                 | -1.21 | 0.73 | 0 | 0 | 0 | not significant |
| 2334 | REACTOME_DOWNREGULATION_OF_SMAD2_3_SMAD4_TRANSCRIPTIONAL_ACTIVIT   | -1.21 | 0.73 | 0 | 0 | 0 | not significant |
| 2335 | AMIT_EGF_RESPONSE_60_HELA                                          | -1.21 | 0.72 | 0 | 0 | 0 | not significant |
| 2336 | CHR9Q22                                                            | -1.21 | 0.72 | 0 | 0 | 0 | not significant |
| 2337 | GO_MRNA_CIS_SPLICING_VIA_SPLICEOSOME                               | -1.21 | 0.72 | 0 | 0 | 0 | not significant |
| 2338 | CHUANG_OXIDATIVE_STRESS_RESPONSE_UP                                | -1.21 | 0.69 | 0 | 0 | 0 | not significant |
| 2339 | GO_MATING                                                          | -1.21 | 0.68 | 0 | 0 | 0 | not significant |
| 2340 | GO_DOPAMINE_RECEPTOR_SIGNALING_PATHWAY                             | -1.21 | 0.66 | 0 | 0 | 0 | not significant |
| 2341 | GO_POSITIVE_REGULATION_OF_VIRAL_RELEASE_FROM_HOST_CELL             | -1.21 | 0.64 | 0 | 0 | 0 | not significant |
| 2342 | GO_POSITIVE_REGULATION_OF_LAMELLIPODIUM_ORGANIZATION               | -1.21 | 0.63 | 0 | 0 | 0 | not significant |
| 2343 | REACTOME_TRAF6_MEDIATED_IRF7_ACTIVATION                            | -1.21 | 0.63 | 0 | 0 | 0 | not significant |
| 2344 | GO_MITOCHONDRIAL_TRANSCRIPTION                                     | -1.21 | 0.62 | 0 | 0 | 0 | not significant |
| 2345 | GO_PEROXISOME_PROLIFERATOR_ACTIVATED_RECEPTOR_SIGNALING_PATHWAY    | -1.21 | 0.62 | 0 | 0 | 0 | not significant |
| 2346 | GO_POSITIVE_REGULATION_BY_HOST_OF_VIRAL_PROCESS                    | -1.21 | 0.62 | 0 | 0 | 0 | not significant |
| 2347 | GO_RNA_STRAND_ANNEALING_ACTIVITY                                   | -1.21 | 0.62 | 0 | 0 | 0 | not significant |
| 2348 | GO_SKELETAL_MUSCLE_ADAPTATION                                      | -1.21 | 0.61 | 0 | 0 | 0 | not significant |
| 2349 | GO_N6_METHYLADENOSINE_CONTAINING_RNA_BINDING                       | -1.21 | 0.6  | 0 | 0 | 0 | not significant |
| 2350 | REACTOME_RUNX1_REGULATES_TRANSCRIPTION_OF_GENES_INVOLVED_IN_DIFFE  | -1.21 | 0.58 | 0 | 0 | 0 | not significant |
| 2351 | GO_S_SHAPED_BODY_MORPHOGENESIS                                     | -1.21 | 0.57 | 0 | 0 | 0 | not significant |
| 2352 | GO_SENSORY_PERCEPTION_OF_TEMPERATURE_STIMULUS                      | -1.21 | 0.56 | 0 | 0 | 0 | not significant |
| 2353 | GO_CYTOSKELETAL_PART                                               | -1.20 | 4    | 0 | 0 | 0 | not significant |
| 2354 | GO_CYTOSKELETON_ORGANIZATION                                       | -1.20 | 4    | 0 | 0 | 0 | not significant |
| 2355 | GO_POSITIVE_REGULATION_OF_CELLULAR_COMPONENT_ORGANIZATION          | -1.20 | 4    | 0 | 0 | 0 | not significant |
| 2356 | LASTOWSKA_NEUROBLASTOMA_COPY_NUMBER_DN                             | -1.20 | 4    | 0 | 0 | 0 | not significant |
| 2357 | REACTOME_POST_TRANSLATIONAL_PROTEIN_MODIFICATION                   | -1.20 | 4    | 0 | 0 | 0 | not significant |
| 2358 | GO_PROTEIN_KINASE_ACTIVITY                                         | -1.20 | 1.6  | 0 | 0 | 0 | not significant |
| 2359 | MOOHA_MITOCHONDRIA                                                 | -1.20 | 1.55 | 0 | 0 | 0 | not significant |
| 2360 | COLINA_TARGETS_OF_4EBP1_AND_4EBP2                                  | -1.20 | 1.39 | 0 | 0 | 0 | not significant |
| 2361 | GO_ATPASE_ACTIVITY_COUPLED                                         | -1.20 | 1.27 | 0 | 0 | 0 | not significant |
| 2362 | REACTOME_INTRACELLULAR_SIGNALING_BY_SECOND_MESSENGERS              | -1.20 | 1.26 | 0 | 0 | 0 | not significant |
| 2363 | GO_RIBOSOME                                                        | -1.20 | 1.16 | 0 | 0 | 0 | not significant |
| 2364 | GO_NEGATIVE_REGULATION_OF_CATABOLIC_PROCESS                        | -1.20 | 1.15 | 0 | 0 | 0 | not significant |
| 2365 | REACTOME_REGULATION_OF_TP53_ACTIVITY                               | -1.20 | 1.1  | 0 | 0 | 0 | not significant |
| 2366 | KYNG_WERNER_SYNDROM_AND_NORMAL_AGING_DN                            | -1.20 | 1.06 | 0 | 0 | 0 | not significant |
| 2367 | PRG2_EZH2_UP_V1_DN                                                 | -1.20 | 1    | 0 | 0 | 0 | not significant |
| 2368 | GO_POSITIVE_REGULATION_OF_PROTEOLYSIS_INVOLVED_IN_CELLULAR_PROTEIN | -1.20 | 0.93 | 0 | 0 | 0 | not significant |
| 2369 | ZHONG_SECRETOME_OF_LUNG_CANCER_AND_FIBROBLAST                      | -1.20 | 0.83 | 0 | 0 | 0 | not significant |
| 2370 | GO_I_BAND                                                          | -1.20 | 0.82 | 0 | 0 | 0 | not significant |
| 2371 | GO_PYRIMIDINE_CONTAINING_COMPOUND_BIOSYNTHETIC_PROCESS             | -1.20 | 0.81 | 0 | 0 | 0 | not significant |
| 2372 | REACTOME_FCGAMMA_RECEPTOR_FCGR_DEPENDENT_PHAGOCYTOSIS              | -1.20 | 0.8  | 0 | 0 | 0 | not significant |
| 2373 | REACTOME_SLC_TRANSPORTER_DISORDERS                                 | -1.20 | 0.8  | 0 | 0 | 0 | not significant |
| 2374 | GO_POSITIVE_REGULATION_OF_PEPTIDYL_SERINE_PHOSPHORYLATION          | -1.20 | 0.75 | 0 | 0 | 0 | not significant |
| 2375 | GO_SARCOPLASM                                                      | -1.20 | 0.75 | 0 | 0 | 0 | not significant |
| 2376 | GO_MULTICELLULAR_ORGANISMAL_MOVEMENT                               | -1.20 | 0.71 | 0 | 0 | 0 | not significant |
| 2377 | KIM_LIVER_CANCER_POOR_SURVIVAL_UP                                  | -1.20 | 0.7  | 0 | 0 | 0 | not significant |
| 2378 | PID_HIF1A_PATHWAY                                                  | -1.20 | 0.7  | 0 | 0 | 0 | not significant |
| 2379 | WILCOX_RESPONSE_TO_PROGESTERONE_DN                                 | -1.20 | 0.7  | 0 | 0 | 0 | not significant |
| 2380 | CHR11Q14                                                           | -1.20 | 0.69 | 0 | 0 | 0 | not significant |
| 2381 | GO_PHOSPHATASE_INHIBITOR_ACTIVITY                                  | -1.20 | 0.69 | 0 | 0 | 0 | not significant |
| 2382 | REACTOME_GPIV_MEDIATED_ACTIVATION_CASCADE                          | -1.20 | 0.69 | 0 | 0 | 0 | not significant |
| 2383 | GO_CHROMATIN_DISASSEMBLY                                           | -1.20 | 0.68 | 0 | 0 | 0 | not significant |
| 2384 | PID_NCADHERIN_PATHWAY                                              | -1.20 | 0.68 | 0 | 0 | 0 | not significant |
| 2385 | GO_CELL_COMMUNICATION_INVOLVED_IN_CARDIAC_CONDUCTION               | -1.20 | 0.67 | 0 | 0 | 0 | not significant |
| 2386 | GO_INCLUSION_BODY_ASSEMBLY                                         | -1.20 | 0.67 | 0 | 0 | 0 | not significant |

|      |                                                                    |       |      |   |   |   |                 |
|------|--------------------------------------------------------------------|-------|------|---|---|---|-----------------|
| 2387 | GO_NUCLEOTIDE_PHOSPHORYLATION                                      | -1.20 | 0.66 | 0 | 0 | 0 | not significant |
| 2388 | GO_REGULATION_OF_SUBSTRATE_ADHESION_DEPENDENT_CELL_SPREADING       | -1.20 | 0.66 | 0 | 0 | 0 | not significant |
| 2389 | PARENT_MTOR_SIGNALING_DN                                           | -1.20 | 0.66 | 0 | 0 | 0 | not significant |
| 2390 | ANASTASSIOU_MULTICANCER_INVASIVENESS_SIGNATURE                     | -1.20 | 0.65 | 0 | 0 | 0 | not significant |
| 2391 | GO_REGULATION_OF_CARDIAC_MUSCLE_CONTRACTION_BY_REGULATION_OF_TH    | -1.20 | 0.65 | 0 | 0 | 0 | not significant |
| 2392 | GO_PROTEIN_LOCALIZATION_TO_CHROMOSOME_CENTROMERIC_REGION           | -1.20 | 0.64 | 0 | 0 | 0 | not significant |
| 2393 | GO_REGULATION_OF_CELLULAR_RESPIRATION                              | -1.20 | 0.64 | 0 | 0 | 0 | not significant |
| 2394 | REACTOME_DOWNSTREAM_SIGNALING_OF_ACTIVATED_FGFR4                   | -1.20 | 0.64 | 0 | 0 | 0 | not significant |
| 2395 | GO_POSITIVE_REGULATION_OF_TRANSCRIPTION_OF_NUCLEOLAR_LARGE_RRNA    | -1.20 | 0.63 | 0 | 0 | 0 | not significant |
| 2396 | REACTOME_DOWNSTREAM_SIGNALING_OF_ACTIVATED_FGFR3                   | -1.20 | 0.63 | 0 | 0 | 0 | not significant |
| 2397 | ZHAN_V1_LATE_DIFFERENTIATION_GENES_DN                              | -1.20 | 0.63 | 0 | 0 | 0 | not significant |
| 2398 | GO_MATERNAL_PLACENTA_DEVELOPMENT                                   | -1.20 | 0.62 | 0 | 0 | 0 | not significant |
| 2399 | GO_POSITIVE_REGULATION_BY_HOST_OF_VIRAL_TRANSCRIPTION              | -1.20 | 0.62 | 0 | 0 | 0 | not significant |
| 2400 | GO_SUCKLING_BEHAVIOR                                               | -1.20 | 0.61 | 0 | 0 | 0 | not significant |
| 2401 | PETRETTO_HEART_MASS_QTL_CIS_DN                                     | -1.20 | 0.61 | 0 | 0 | 0 | not significant |
| 2402 | GO_AXO_DENDRITIC_PROTEIN_TRANSPORT                                 | -1.20 | 0.6  | 0 | 0 | 0 | not significant |
| 2403 | HOEGERKORP_CD44_TARGETS_DIRECT_UP                                  | -1.20 | 0.6  | 0 | 0 | 0 | not significant |
| 2404 | REACTOME_DOWNSTREAM_SIGNALING_OF_ACTIVATED_FGFR1                   | -1.20 | 0.6  | 0 | 0 | 0 | not significant |
| 2405 | REACTOME_DOWNSTREAM_SIGNALING_OF_ACTIVATED_FGFR2                   | -1.20 | 0.6  | 0 | 0 | 0 | not significant |
| 2406 | GO_ACTIN_DEPENDENT_ATPASE_ACTIVITY                                 | -1.20 | 0.59 | 0 | 0 | 0 | not significant |
| 2407 | GO_HISTONE_H3_K36_METHYLATION                                      | -1.20 | 0.59 | 0 | 0 | 0 | not significant |
| 2408 | GO_NEGATIVE_REGULATION_OF_DNA_DAMAGE_RESPONSE_SIGNAL_TRANSDUCTI    | -1.20 | 0.59 | 0 | 0 | 0 | not significant |
| 2409 | GO_SUMO_SPECIFIC_PROTEASE_ACTIVITY                                 | -1.20 | 0.59 | 0 | 0 | 0 | not significant |
| 2410 | REACTOME_PI_3K_CASCADE_FGFR3                                       | -1.20 | 0.59 | 0 | 0 | 0 | not significant |
| 2411 | GO_MEIOSIS_II_CELL_CYCLE_PROCESS                                   | -1.20 | 0.58 | 0 | 0 | 0 | not significant |
| 2412 | GO_MYOSIN_II_COMPLEX                                               | -1.20 | 0.58 | 0 | 0 | 0 | not significant |
| 2413 | GO_PURINE_NUCLEOBASE_BIOSYNTHETIC_PROCESS                          | -1.20 | 0.58 | 0 | 0 | 0 | not significant |
| 2414 | REACTOME_GLUCAGON_TYPE_LIGAND_RECEPTORS                            | -1.20 | 0.58 | 0 | 0 | 0 | not significant |
| 2415 | REACTOME_SURFACTANT_METABOLISM                                     | -1.20 | 0.58 | 0 | 0 | 0 | not significant |
| 2416 | GO_AXONAL_TRANSPORT_OF_MITOCHONDRION                               | -1.20 | 0.57 | 0 | 0 | 0 | not significant |
| 2417 | GO_POSITIVE_REGULATION_OF_NEURON_MIGRATION                         | -1.20 | 0.57 | 0 | 0 | 0 | not significant |
| 2418 | GO_RESPONSE_TO_TUMOR_CELL                                          | -1.20 | 0.57 | 0 | 0 | 0 | not significant |
| 2419 | WU_ALZHEIMER_DISEASE_UP                                            | -1.20 | 0.57 | 0 | 0 | 0 | not significant |
| 2420 | REACTOME_UBIQUINOL_BIOSYNTHESIS                                    | -1.20 | 0.56 | 0 | 0 | 0 | not significant |
| 2421 | GO_7SK_SNRNA_BINDING                                               | -1.20 | 0.55 | 0 | 0 | 0 | not significant |
| 2422 | GO_MALE_GENITALIA_DEVELOPMENT                                      | -1.20 | 0.55 | 0 | 0 | 0 | not significant |
| 2423 | GO_MOTOR_NEURON_APOPTOTIC_PROCESS                                  | -1.20 | 0.54 | 0 | 0 | 0 | not significant |
| 2424 | REACTOME_PI_3K_CASCADE_FGFR2                                       | -1.20 | 0.54 | 0 | 0 | 0 | not significant |
| 2425 | GO_HOST_INTRACELLULAR_ORGANELLE                                    | -1.20 | 0.53 | 0 | 0 | 0 | not significant |
| 2426 | GO_INTRACELLULAR_PROTEIN_TRANSPORT                                 | -1.19 | 4    | 0 | 0 | 0 | not significant |
| 2427 | GO_MACROMOLECULE_CATABOLIC_PROCESS                                 | -1.19 | 4    | 0 | 0 | 0 | not significant |
| 2428 | GO_ORGANELLE_ASSEMBLY                                              | -1.19 | 4    | 0 | 0 | 0 | not significant |
| 2429 | GO_TRANSFERASE_COMPLEX                                             | -1.19 | 1.89 | 0 | 0 | 0 | not significant |
| 2430 | GO_MITOCHONDRIAL_ENVELOPE                                          | -1.19 | 1.54 | 0 | 0 | 0 | not significant |
| 2431 | GO_NEGATIVE_REGULATION_OF_CELL_CYCLE                               | -1.19 | 1.48 | 0 | 0 | 0 | not significant |
| 2432 | GO_POSITIVE_REGULATION_OF_PROTEOLYSIS                              | -1.19 | 1.32 | 0 | 0 | 0 | not significant |
| 2433 | YOSHIMURA_MAPK8_TARGETS_DN                                         | -1.19 | 1.17 | 0 | 0 | 0 | not significant |
| 2434 | GO_CYTOSKELETON_DEPENDENT_INTRACELLULAR_TRANSPORT                  | -1.19 | 1.12 | 0 | 0 | 0 | not significant |
| 2435 | WANG_TUMOR_INVASIVENESS_DN                                         | -1.19 | 1.11 | 0 | 0 | 0 | not significant |
| 2436 | WONG_MITOCHONDRIA_GENE_MODULE                                      | -1.19 | 1.04 | 0 | 0 | 0 | not significant |
| 2437 | REACTOME_PLATELET_ACTIVATION_SIGNALING_AND_AGGREGATION             | -1.19 | 0.96 | 0 | 0 | 0 | not significant |
| 2438 | REACTOME_PROTEIN_LOCALIZATION                                      | -1.19 | 0.95 | 0 | 0 | 0 | not significant |
| 2439 | BURTON_ADIPOGENESIS_5                                              | -1.19 | 0.92 | 0 | 0 | 0 | not significant |
| 2440 | REACTOME_SIGNALING_BY_NTRKS                                        | -1.19 | 0.89 | 0 | 0 | 0 | not significant |
| 2441 | GO_HETEROCHROMATIN                                                 | -1.19 | 0.86 | 0 | 0 | 0 | not significant |
| 2442 | GO_CYTOPLASMIC_STRESS_GRANULE                                      | -1.19 | 0.85 | 0 | 0 | 0 | not significant |
| 2443 | GO_DNA_GEOMETRIC_CHANGE                                            | -1.19 | 0.79 | 0 | 0 | 0 | not significant |
| 2444 | FIGUEROA_AML_METHYLATION_CLUSTER_1_UP                              | -1.19 | 0.78 | 0 | 0 | 0 | not significant |
| 2445 | RODRIGUES_THYROID_CARCINOMA_DN                                     | -1.19 | 0.78 | 0 | 0 | 0 | not significant |
| 2446 | GO_POSITIVE_REGULATION_OF_GENE_EXPRESSION_EPIGENETIC               | -1.19 | 0.77 | 0 | 0 | 0 | not significant |
| 2447 | GO_CYTOCHROME_COMPLEX_ASSEMBLY                                     | -1.19 | 0.73 | 0 | 0 | 0 | not significant |
| 2448 | REACTOME_RHO_GTPASES_ACTIVATE_WASPS_AND_WAVES                      | -1.19 | 0.73 | 0 | 0 | 0 | not significant |
| 2449 | PID_LKB1_PATHWAY                                                   | -1.19 | 0.71 | 0 | 0 | 0 | not significant |
| 2450 | GO_GROWTH_FACTOR_ACTIVITY                                          | -1.19 | 0.7  | 0 | 0 | 0 | not significant |
| 2451 | GO_NEURAL_CREST_CELL_DIFFERENTIATION                               | -1.19 | 0.7  | 0 | 0 | 0 | not significant |
| 2452 | HASLINGER_B_CLL_WITH_17P13_DELETION                                | -1.19 | 0.69 | 0 | 0 | 0 | not significant |
| 2453 | MOREIRA_RESPONSE_TO_TSA_UP                                         | -1.19 | 0.69 | 0 | 0 | 0 | not significant |
| 2454 | GO_THYMUS_DEVELOPMENT                                              | -1.19 | 0.66 | 0 | 0 | 0 | not significant |
| 2455 | GO_REGULATION_OF_CALCINEURIN_MEDIATED_SIGNALING                    | -1.19 | 0.65 | 0 | 0 | 0 | not significant |
| 2456 | GO_T_TUBULE                                                        | -1.19 | 0.65 | 0 | 0 | 0 | not significant |
| 2457 | REACTOME_SMAD2_SMAD3_SMAD4_HETEROTRIMER_REGULATES_TRANSCRIPTION    | -1.19 | 0.65 | 0 | 0 | 0 | not significant |
| 2458 | TIEN_INTESTINE_PROBIOTICS_2HR_UP                                   | -1.19 | 0.65 | 0 | 0 | 0 | not significant |
| 2459 | GO_OOCYTE_DIFFERENTIATION                                          | -1.19 | 0.63 | 0 | 0 | 0 | not significant |
| 2460 | REACTOME_METABOLISM_OF_COFACTORS                                   | -1.19 | 0.63 | 0 | 0 | 0 | not significant |
| 2461 | GO_REGULATION_OF_ASTROCYTE_DIFFERENTIATION                         | -1.19 | 0.61 | 0 | 0 | 0 | not significant |
| 2462 | GO_RELEASE_OF_SEQUESTERED_CALCMIUM_ION_INTO_CYTOSOL_BY_ENDOPLASM   | -1.19 | 0.61 | 0 | 0 | 0 | not significant |
| 2463 | GO_CELLULAR_RESPONSE_TO_VITAMIN                                    | -1.19 | 0.6  | 0 | 0 | 0 | not significant |
| 2464 | GO_NEGATIVE_REGULATION_OF_CENTROSOME_CYCLE                         | -1.19 | 0.6  | 0 | 0 | 0 | not significant |
| 2465 | GO_POSITIVE_REGULATION_OF_KERATINOCYTE_DIFFERENTIATION             | -1.19 | 0.6  | 0 | 0 | 0 | not significant |
| 2466 | REACTOME_Glutamate_BINDING_ACTIVATION_OF_AMPA_RECEPTORS_AND_SYN    | -1.19 | 0.6  | 0 | 0 | 0 | not significant |
| 2467 | DISTECHE_ESCAPED_FROM_X_INACTIVATION                               | -1.19 | 0.59 | 0 | 0 | 0 | not significant |
| 2468 | GO_FRUCTOSE_METABOLIC_PROCESS                                      | -1.19 | 0.58 | 0 | 0 | 0 | not significant |
| 2469 | GO_GENITALIA_DEVELOPMENT                                           | -1.19 | 0.58 | 0 | 0 | 0 | not significant |
| 2470 | GO_PSEUDOPODIUM_ORGANIZATION                                       | -1.19 | 0.58 | 0 | 0 | 0 | not significant |
| 2471 | MYLLYKANGAS_AMPLIFICATION_HOT_SPOT_17                              | -1.19 | 0.58 | 0 | 0 | 0 | not significant |
| 2472 | RICKMAN_TUMOR_DIFFERENTIATED_MODERATELY_VS_POORLY_DN               | -1.19 | 0.58 | 0 | 0 | 0 | not significant |
| 2473 | GO_EXPLORATION_BEHAVIOR                                            | -1.19 | 0.57 | 0 | 0 | 0 | not significant |
| 2474 | GO_MYOSIN_FILAMENT                                                 | -1.19 | 0.57 | 0 | 0 | 0 | not significant |
| 2475 | GO_NEGATIVE_REGULATION_OF_GLUCOSE_TRANSMEMBRANE_TRANSPORT          | -1.19 | 0.57 | 0 | 0 | 0 | not significant |
| 2476 | GO_PEPTIDYL_ARGININE_METHYLATION_TO_ASYMMETRICAL_DIMETHYL_ARGININE | -1.19 | 0.57 | 0 | 0 | 0 | not significant |
| 2477 | GO_POSITIVE_REGULATION_OF_LONG_TERM_SYNAPTIC_POTENTIATION          | -1.19 | 0.57 | 0 | 0 | 0 | not significant |
| 2478 | GO_REGULATION_OF_LONG_TERM_NEURONAL_SYNAPTIC_PLASTICITY            | -1.19 | 0.57 | 0 | 0 | 0 | not significant |
| 2479 | GO_TRNA_GUANINE_METHYLTRANSFERASE_ACTIVITY                         | -1.19 | 0.57 | 0 | 0 | 0 | not significant |
| 2480 | REACTOME_TRNA_PROCESSING_IN_THE_MITOCHONDRION                      | -1.19 | 0.56 | 0 | 0 | 0 | not significant |
| 2481 | GO_ALDEHYDE_DEHYDROGENASE_NAD_ACTIVITY                             | -1.19 | 0.55 | 0 | 0 | 0 | not significant |
| 2482 | GO_TRANSCRIPTION_FACTOR_TFIIB_COMPLEX                              | -1.19 | 0.55 | 0 | 0 | 0 | not significant |
| 2483 | GO_WASH_COMPLEX                                                    | -1.19 | 0.55 | 0 | 0 | 0 | not significant |
| 2484 | REACTOME_REGULATION_OF_PTEN_LOCALIZATION                           | -1.19 | 0.55 | 0 | 0 | 0 | not significant |
| 2485 | GO_CALCMIUM_CHANNEL_INHIBITOR_ACTIVITY                             | -1.19 | 0.54 | 0 | 0 | 0 | not significant |
| 2486 | REACTOME_SUMO_IS_PROTEOLYTICALLY_PROCESSED                         | -1.19 | 0.54 | 0 | 0 | 0 | not significant |
| 2487 | GO_GROWTH_HORMONE_SECRETION                                        | -1.19 | 0.53 | 0 | 0 | 0 | not significant |
| 2488 | GO_NEGATIVE_REGULATION_OF_CHONDROCYTE_DIFFERENTIATION              | -1.19 | 0.53 | 0 | 0 | 0 | not significant |
| 2489 | GO_OPSONIN_BINDING                                                 | -1.19 | 0.53 | 0 | 0 | 0 | not significant |
| 2490 | GO_STRESS_GRANULE_DISASSEMBLY                                      | -1.19 | 0.52 | 0 | 0 | 0 | not significant |
| 2491 | GO_HYALURONIC_ACID_BINDING                                         | -1.19 | 0.51 | 0 | 0 | 0 | not significant |
| 2492 | GO_RESPONSE_TO_ISOLATION_STRESS                                    | -1.19 | 0.51 | 0 | 0 | 0 | not significant |
| 2493 | GO_PROTEIN_PHOSPHORYLATION                                         | -1.18 | 4    | 0 | 0 | 0 | not significant |
| 2494 | REACTOME_GENERIC_TRANSCRIPTION_PATHWAY                             | -1.18 | 4    | 0 | 0 | 0 | not significant |
| 2495 | REACTOME_DISEASES_OF_SIGNAL_TRANSDUCTION                           | -1.18 | 1.65 | 0 | 0 | 0 | not significant |

|      |                                                                     |       |      |   |   |   |                 |
|------|---------------------------------------------------------------------|-------|------|---|---|---|-----------------|
| 2496 | GO_REGULATION_OF_NERVOUS_SYSTEM_DEVELOPMENT                         | -1.18 | 1.45 | 0 | 0 | 0 | not significant |
| 2497 | STEIN_ESRRA_TARGETS_UP                                              | -1.18 | 1.42 | 0 | 0 | 0 | not significant |
| 2498 | GO_CELL_CYCLE_CHECKPOINT                                            | -1.18 | 1.05 | 0 | 0 | 0 | not significant |
| 2499 | GO_FICOLIN_1_RICH_GRANULE                                           | -1.18 | 0.97 | 0 | 0 | 0 | not significant |
| 2500 | GO_MIDBODY                                                          | -1.18 | 0.94 | 0 | 0 | 0 | not significant |
| 2501 | GARCIA_TARGETS_OF_FL11_AND_DAX1_DN                                  | -1.18 | 0.9  | 0 | 0 | 0 | not significant |
| 2502 | GO_MITOTIC_CELL_CYCLE_CHECKPOINT                                    | -1.18 | 0.89 | 0 | 0 | 0 | not significant |
| 2503 | REACTOME_TRANSMISSION_ACROSS_CHEMICAL_SYNAPSES                      | -1.18 | 0.89 | 0 | 0 | 0 | not significant |
| 2504 | GOLDRATH_HOMEOSTATIC_PROLIFERATION                                  | -1.18 | 0.88 | 0 | 0 | 0 | not significant |
| 2505 | FIRESTEIN_PROLIFERATION                                             | -1.18 | 0.84 | 0 | 0 | 0 | not significant |
| 2506 | GO_ACETYLTRANSFERASE_ACTIVITY                                       | -1.18 | 0.84 | 0 | 0 | 0 | not significant |
| 2507 | P53_DNV2_DN                                                         | -1.18 | 0.81 | 0 | 0 | 0 | not significant |
| 2508 | GO_REGULATION_OF_PEPTIDYL_SERINE_PHOSPHORYLATION                    | -1.18 | 0.79 | 0 | 0 | 0 | not significant |
| 2509 | TSENG_IRS1_TARGETS_UP                                               | -1.18 | 0.78 | 0 | 0 | 0 | not significant |
| 2510 | BERTUCCI_MEDULLARY_VS_DUCTAL_BREAST_CANCER_DN                       | -1.18 | 0.77 | 0 | 0 | 0 | not significant |
| 2511 | GO_REGULATION_OF_PROTEIN_COMPLEX_DISASSEMBLY                        | -1.18 | 0.77 | 0 | 0 | 0 | not significant |
| 2512 | GO_ENDOPEPTIDASE_REGULATOR_ACTIVITY                                 | -1.18 | 0.76 | 0 | 0 | 0 | not significant |
| 2513 | SESTO_RESPONSE_TO_UV_C2                                             | -1.18 | 0.74 | 0 | 0 | 0 | not significant |
| 2514 | KEGG_PATHOGENIC_ESCHERICHIA_COLI_INFECTION                          | -1.18 | 0.72 | 0 | 0 | 0 | not significant |
| 2515 | GO_ATP_DEPENDENT_DNA_HELICASE_ACTIVITY                              | -1.18 | 0.7  | 0 | 0 | 0 | not significant |
| 2516 | BROWNE_HCMV_INFECTION_6HR_UP                                        | -1.18 | 0.69 | 0 | 0 | 0 | not significant |
| 2517 | CHOI_ATL_STAGE_PREDICTOR                                            | -1.18 | 0.68 | 0 | 0 | 0 | not significant |
| 2518 | PID_ECADHERIN_NASCENT_AJ_PATHWAY                                    | -1.18 | 0.67 | 0 | 0 | 0 | not significant |
| 2519 | BROWNE_HCMV_INFECTION_8HR_DN                                        | -1.18 | 0.66 | 0 | 0 | 0 | not significant |
| 2520 | GO_NEGATIVE_REGULATION_OF_INTRINSIC_APOPTOTIC_SIGNALING_PATHWAY_IN  | -1.18 | 0.66 | 0 | 0 | 0 | not significant |
| 2521 | GENTILE_UV_RESPONSE_CLUSTER_D6                                      | -1.18 | 0.65 | 0 | 0 | 0 | not significant |
| 2522 | WIEDERSCHAIN_TARGETS_OF_BM1_AND_PCGF2                               | -1.18 | 0.65 | 0 | 0 | 0 | not significant |
| 2523 | CHANGOLKAR_H2AFY_TARGETS_DN                                         | -1.18 | 0.64 | 0 | 0 | 0 | not significant |
| 2524 | ANASTASSIOU_CANCER_MESENCHYMAL_TRANSITION_SIGNATURE                 | -1.18 | 0.62 | 0 | 0 | 0 | not significant |
| 2525 | GO_INTRASPECIES_INTERACTION_BETWEEN_ORGANISMS                       | -1.18 | 0.62 | 0 | 0 | 0 | not significant |
| 2526 | GO_TRANSFORMING_GROWTH_FACTOR_BETA_RECEPTOR_BINDING                 | -1.18 | 0.62 | 0 | 0 | 0 | not significant |
| 2527 | GO_NEGATIVE_REGULATION_OF_CATION_CHANNEL_ACTIVITY                   | -1.18 | 0.61 | 0 | 0 | 0 | not significant |
| 2528 | GO_RETINOIC_ACID_RECEPTOR_SIGNALING_PATHWAY                         | -1.18 | 0.61 | 0 | 0 | 0 | not significant |
| 2529 | REACTOME_SIGNALING_BY_EGFRVIII_IN_CANCER                            | -1.18 | 0.6  | 0 | 0 | 0 | not significant |
| 2530 | GO_OXIDOREDUCTASE_ACTIVITY_ACTING_ON_THE_CH_NH2_GROUP_OF_DONORS     | -1.18 | 0.59 | 0 | 0 | 0 | not significant |
| 2531 | GO_REGULATION_OF_CARDIAC_MUSCLE_CELL_ACTION_POTENTIAL               | -1.18 | 0.59 | 0 | 0 | 0 | not significant |
| 2532 | GO_RESPIRATORY_CHAIN_COMPLEX_III                                    | -1.18 | 0.59 | 0 | 0 | 0 | not significant |
| 2533 | GO_GOLGI_TRANSPORT_COMPLEX                                          | -1.18 | 0.58 | 0 | 0 | 0 | not significant |
| 2534 | MATTIOLI_MULTIPLE_MYELOMA_SUBGROUPS                                 | -1.18 | 0.58 | 0 | 0 | 0 | not significant |
| 2535 | SA_G2_AND_M_PHASES                                                  | -1.18 | 0.57 | 0 | 0 | 0 | not significant |
| 2536 | GO_CELLULAR_RESPONSE_TO_EPINEPHRINE_STIMULUS                        | -1.18 | 0.56 | 0 | 0 | 0 | not significant |
| 2537 | GO_N_TERMINAL_PEPTIDYL_METHIONINE_ACETYLATION                       | -1.18 | 0.56 | 0 | 0 | 0 | not significant |
| 2538 | GO_NITRIC_OXIDE_SYNTHASE_BINDING                                    | -1.18 | 0.56 | 0 | 0 | 0 | not significant |
| 2539 | GO_POSITIVE_REGULATION_OF_MEMBRANE_POTENTIAL                        | -1.18 | 0.55 | 0 | 0 | 0 | not significant |
| 2540 | GO_NEGATIVE_REGULATION_OF_SKELETAL_MUSCLE_TISSUE_DEVELOPMENT        | -1.18 | 0.55 | 0 | 0 | 0 | not significant |
| 2541 | GO_NUCLEOSIDE_DIPHOSPHATE_BIOSYNTHETIC_PROCESS                      | -1.18 | 0.55 | 0 | 0 | 0 | not significant |
| 2542 | GO_POSITIVE_REGULATION_OF_SODIUM_ION_TRANSMEMBRANE_TRANSPORTER_1    | -1.18 | 0.55 | 0 | 0 | 0 | not significant |
| 2543 | GO_SPONGIOTROPHOBLAST_LAYER_DEVELOPMENT                             | -1.18 | 0.55 | 0 | 0 | 0 | not significant |
| 2544 | MOROSSETTI_FACIOSCAPULOHUMERAL_MUSCULAR_DISTROPHY_UP                | -1.18 | 0.55 | 0 | 0 | 0 | not significant |
| 2545 | GO_NEGATIVE_REGULATION_OF_SMOOTHENED_SIGNALING_PATHWAY_INVOLVED     | -1.18 | 0.54 | 0 | 0 | 0 | not significant |
| 2546 | GO_POSITIVE_REGULATION_OF_HISTONE_PHOSPHORYLATION                   | -1.18 | 0.54 | 0 | 0 | 0 | not significant |
| 2547 | GO_REGULATION_BY_VIRUS_OF_VIRAL_PROTEIN_LEVELS_IN_HOST_CELL         | -1.18 | 0.54 | 0 | 0 | 0 | not significant |
| 2548 | REACTOME_PTK6_REGULATES_RHO_GTPASES_RAS_GTPASE_AND_MAP_KINASES      | -1.18 | 0.54 | 0 | 0 | 0 | not significant |
| 2549 | SUZUKI_AMPLIFIED_IN_ORAL_CANCER                                     | -1.18 | 0.54 | 0 | 0 | 0 | not significant |
| 2550 | GO_SCHWANN_CELL_PROLIFERATION                                       | -1.18 | 0.53 | 0 | 0 | 0 | not significant |
| 2551 | BIOCARTA_P35ALZHEIMERS_PATHWAY                                      | -1.18 | 0.52 | 0 | 0 | 0 | not significant |
| 2552 | GO_AMIDE_BIOSYNTHETIC_PROCESS                                       | -1.17 | 4    | 0 | 0 | 0 | not significant |
| 2553 | GO_INTRACELLULAR_TRANSPORT                                          | -1.17 | 4    | 0 | 0 | 0 | not significant |
| 2554 | SENESE_HDAC3_TARGETS_UP                                             | -1.17 | 1.52 | 0 | 0 | 0 | not significant |
| 2555 | GO_NUCLEAR_CHROMOSOME                                               | -1.17 | 1.49 | 0 | 0 | 0 | not significant |
| 2556 | GO_CHROMATIN                                                        | -1.17 | 1.4  | 0 | 0 | 0 | not significant |
| 2557 | SMID_BREAST_CANCER_BASAL_UP                                         | -1.17 | 1.28 | 0 | 0 | 0 | not significant |
| 2558 | DEBIASI_APOPTOSIS_BY_REOVIRUS_INFECTION_UP                          | -1.17 | 1.18 | 0 | 0 | 0 | not significant |
| 2559 | PURBEY_TARGETS_OF_CTBP1_NOT_SATB1_UP                                | -1.17 | 1.12 | 0 | 0 | 0 | not significant |
| 2560 | GO_DNA_BIOSYNTHETIC_PROCESS                                         | -1.17 | 1.04 | 0 | 0 | 0 | not significant |
| 2561 | FUJII_YBX1_TARGETS_DN                                               | -1.17 | 1.01 | 0 | 0 | 0 | not significant |
| 2562 | SANSOM_APC_MYC_TARGETS                                              | -1.17 | 1    | 0 | 0 | 0 | not significant |
| 2563 | SENESE_HDAC1_AND_HDAC2_TARGETS_UP                                   | -1.17 | 0.95 | 0 | 0 | 0 | not significant |
| 2564 | GO_CIRCADIAN_RHYTHM                                                 | -1.17 | 0.91 | 0 | 0 | 0 | not significant |
| 2565 | KAAB_FAILED_HEART_ATRIUM_DN                                         | -1.17 | 0.91 | 0 | 0 | 0 | not significant |
| 2566 | GO_MICROTUBULE_ORGANIZING_CENTER_ORGANIZATION                       | -1.17 | 0.9  | 0 | 0 | 0 | not significant |
| 2567 | GO_POSITIVE_REGULATION_OF_CHROMOSOME_ORGANIZATION                   | -1.17 | 0.89 | 0 | 0 | 0 | not significant |
| 2568 | GO_TELOMERE_ORGANIZATION                                            | -1.17 | 0.89 | 0 | 0 | 0 | not significant |
| 2569 | PENG_GLUCOSE_DEPRIVATION_DN                                         | -1.17 | 0.89 | 0 | 0 | 0 | not significant |
| 2570 | FIGUEROA_AML_METHYLATION_CLUSTER_3_UP                               | -1.17 | 0.84 | 0 | 0 | 0 | not significant |
| 2571 | GO_RNA_POLYMERASE_II_DISTAL_ENHANCER_SEQUENCE_SPECIFIC_DNA_BINDING  | -1.17 | 0.84 | 0 | 0 | 0 | not significant |
| 2572 | SHEN_SMARCA2_TARGETS_DN                                             | -1.17 | 0.83 | 0 | 0 | 0 | not significant |
| 2573 | KAYO_AGING_MUSCLE_DN                                                | -1.17 | 0.76 | 0 | 0 | 0 | not significant |
| 2574 | GO_REGULATION_OF_MUSCLE_CONTRACTION                                 | -1.17 | 0.75 | 0 | 0 | 0 | not significant |
| 2575 | REACTOME_NONHOMOLOGOUS_END_JOINING_NHEJ                             | -1.17 | 0.73 | 0 | 0 | 0 | not significant |
| 2576 | GO_CELLULAR_RESPONSE_TO_UV                                          | -1.17 | 0.72 | 0 | 0 | 0 | not significant |
| 2577 | PID_TAP63_PATHWAY                                                   | -1.17 | 0.71 | 0 | 0 | 0 | not significant |
| 2578 | ZAMORA_NOS2_TARGETS_DN                                              | -1.17 | 0.71 | 0 | 0 | 0 | not significant |
| 2579 | REN_BOUND_BY_E2F                                                    | -1.17 | 0.7  | 0 | 0 | 0 | not significant |
| 2580 | JAZAERI_BREAST_CANCER_BRCA1_VS_BRCA2_UP                             | -1.17 | 0.68 | 0 | 0 | 0 | not significant |
| 2581 | GO_POSITIVE_REGULATION_OF_FIBROBLAST_PROLIFERATION                  | -1.17 | 0.67 | 0 | 0 | 0 | not significant |
| 2582 | JAERVINEN_AMPLIFIED_IN_LARYNGEAL_CANCER                             | -1.17 | 0.66 | 0 | 0 | 0 | not significant |
| 2583 | PID_ECADHERIN_STABILIZATION_PATHWAY                                 | -1.17 | 0.66 | 0 | 0 | 0 | not significant |
| 2584 | GO_NEUROTROPHIN_SIGNALING_PATHWAY                                   | -1.17 | 0.65 | 0 | 0 | 0 | not significant |
| 2585 | GO_REGULATION_OF_INTRINSIC_APOPTOTIC_SIGNALING_PATHWAY_BY_P53_CLAS  | -1.17 | 0.65 | 0 | 0 | 0 | not significant |
| 2586 | GO_REGULATION_OF_STRIATED_MUSCLE_CONTRACTION                        | -1.17 | 0.65 | 0 | 0 | 0 | not significant |
| 2587 | GO_VESICLE_COAT                                                     | -1.17 | 0.65 | 0 | 0 | 0 | not significant |
| 2588 | PID_WNT_CANONICAL_PATHWAY                                           | -1.17 | 0.65 | 0 | 0 | 0 | not significant |
| 2589 | GO_INNER_MITOCHONDRIAL_MEMBRANE_ORGANIZATION                        | -1.17 | 0.64 | 0 | 0 | 0 | not significant |
| 2590 | GO_POSITIVE_REGULATION_OF_POSTTRANSCRIPTIONAL_GENE_SILENCING        | -1.17 | 0.63 | 0 | 0 | 0 | not significant |
| 2591 | GO_PROTEASOMAL_UBIQUITIN_INDEPENDENT_PROTEIN_CATABOLIC_PROCESS      | -1.17 | 0.63 | 0 | 0 | 0 | not significant |
| 2592 | CHESSLER_BRAIN_HIGHEST_GENETIC_VARIANCE                             | -1.17 | 0.62 | 0 | 0 | 0 | not significant |
| 2593 | GO_POSITIVE_REGULATION_OF_MUSCLE_CELL_APOPTOTIC_PROCESS             | -1.17 | 0.62 | 0 | 0 | 0 | not significant |
| 2594 | SIMBULAN_UV_RESPONSE_NORMAL_DN                                      | -1.17 | 0.61 | 0 | 0 | 0 | not significant |
| 2595 | GO_GLIAL_CELL_APOPTOTIC_PROCESS                                     | -1.17 | 0.59 | 0 | 0 | 0 | not significant |
| 2596 | GO_REGULATION_OF GRANULOCYTE_CHEMOTAXIS                             | -1.17 | 0.59 | 0 | 0 | 0 | not significant |
| 2597 | GRATIAS_RETINOBLASTOMA_16Q24                                        | -1.17 | 0.59 | 0 | 0 | 0 | not significant |
| 2598 | BIOCARTA_PML_PATHWAY                                                | -1.17 | 0.58 | 0 | 0 | 0 | not significant |
| 2599 | GO_EMBRYONIC_CAMERA_TYPE_EYE_DEVELOPMENT                            | -1.17 | 0.58 | 0 | 0 | 0 | not significant |
| 2600 | GO_REGULATION_OF_TRANSCRIPTION_INITIATION_FROM_RNA_POLYMERASE_II_PF | -1.17 | 0.58 | 0 | 0 | 0 | not significant |
| 2601 | WU_HBX_TARGETS_2_DN                                                 | -1.17 | 0.58 | 0 | 0 | 0 | not significant |
| 2602 | GO_CELLULAR_RESPONSE_TO_REACTIVE_NITROGEN_SPECIES                   | -1.17 | 0.57 | 0 | 0 | 0 | not significant |
| 2603 | GO_PLATELET_MORPHOGENESIS                                           | -1.17 | 0.57 | 0 | 0 | 0 | not significant |
| 2604 | GO_REGULATION_OF_SMOOTHENED_SIGNALING_PATHWAY_INVOLVED_IN_DORSAL    | -1.17 | 0.57 | 0 | 0 | 0 | not significant |

|      |                                                                    |       |      |   |   |   |                 |
|------|--------------------------------------------------------------------|-------|------|---|---|---|-----------------|
| 2605 | GO_SIGNAL_TRANSDUCTION_INVOLVED_IN_G2_DNA_DAMAGE_CHECKPOINT        | -1.17 | 0.57 | 0 | 0 | 0 | not significant |
| 2606 | GO_VITAMIN_D_RECEPTOR_BINDING                                      | -1.17 | 0.57 | 0 | 0 | 0 | not significant |
| 2607 | LY_AGING_PREMATURITY_DN                                            | -1.17 | 0.57 | 0 | 0 | 0 | not significant |
| 2608 | GO_LACTATE_METABOLIC_PROCESS                                       | -1.17 | 0.55 | 0 | 0 | 0 | not significant |
| 2609 | GO_NEGATIVE_REGULATION_OF_CIRCADIAN_RHYTHM                         | -1.17 | 0.55 | 0 | 0 | 0 | not significant |
| 2610 | GO_RESPONSE_TO_DOPAMINE                                            | -1.17 | 0.55 | 0 | 0 | 0 | not significant |
| 2611 | REACTOME_ACTIVATION_OF_BAD_AND_TRANSLLOCATION_TO_MITOCHONDRIA      | -1.17 | 0.55 | 0 | 0 | 0 | not significant |
| 2612 | GO_INSULIN LIKE_GROWTH_FACTOR_RECEPTOR_BINDING                     | -1.17 | 0.54 | 0 | 0 | 0 | not significant |
| 2613 | GO_OXIDOREDUCTASE_ACTIVITY_ACTING_ON_THE_CH_CH_GROUP_OF_DONORS     | -1.17 | 0.54 | 0 | 0 | 0 | not significant |
| 2614 | KEGG_ASCORBATE_AND_ALDARATE_METABOLISM                             | -1.17 | 0.54 | 0 | 0 | 0 | not significant |
| 2615 | GO_NEGATIVE_REGULATION_OF_RYANODINE_SENSITIVE_CALCIIUM_RELEASE_CHA | -1.17 | 0.53 | 0 | 0 | 0 | not significant |
| 2616 | GO_RNA_POLYMERASE_III_TRANSCRIPTION_FACTOR_COMPLEX                 | -1.17 | 0.53 | 0 | 0 | 0 | not significant |
| 2617 | GO_POSTTRANSLATIONAL_PROTEIN_TARGETING_TO_ENDOPLASMIC_RETICULUM    | -1.17 | 0.52 | 0 | 0 | 0 | not significant |
| 2618 | BIOCARTA_BARRESTIN_PATHWAY                                         | -1.17 | 0.51 | 0 | 0 | 0 | not significant |
| 2619 | GO_AMP_BIOSYNTHETIC_PROCESS                                        | -1.17 | 0.51 | 0 | 0 | 0 | not significant |
| 2620 | GO_TORC1_COMPLEX                                                   | -1.17 | 0.51 | 0 | 0 | 0 | not significant |
| 2621 | GO_MODULATION_OF_SIGNAL_TRANSDUCTION_IN_OTHER_ORGANISM             | -1.17 | 0.5  | 0 | 0 | 0 | not significant |
| 2622 | PALOMERO_GSI_SENSITIVITY_UP                                        | -1.17 | 0.49 | 0 | 0 | 0 | not significant |
| 2623 | GO_PROTEIN_CATABOLIC_PROCESS                                       | -1.16 | 1.82 | 0 | 0 | 0 | not significant |
| 2624 | DANG_BOUND_BY_MYC                                                  | -1.16 | 1.72 | 0 | 0 | 0 | not significant |
| 2625 | GO_MITOCHONDRION_ORGANIZATION                                      | -1.16 | 1.58 | 0 | 0 | 0 | not significant |
| 2626 | FLECHNER_BIOPSY_KIDNEY_TRANSPLANT_REJECTED_VS_OK_DN                | -1.16 | 1.44 | 0 | 0 | 0 | not significant |
| 2627 | SHEN_SMARCA2_TARGETS_UP                                            | -1.16 | 1.43 | 0 | 0 | 0 | not significant |
| 2628 | GO_ACTIVATION_OF_INNATE_IMMUNE_RESPONSE                            | -1.16 | 1.03 | 0 | 0 | 0 | not significant |
| 2629 | SENGUPTA_NASOPHARYNGEAL_CARCINOMA_UP                               | -1.16 | 1.01 | 0 | 0 | 0 | not significant |
| 2630 | GO_INTERACTION_WITH_HOST                                           | -1.16 | 0.93 | 0 | 0 | 0 | not significant |
| 2631 | GO_MAINTENANCE_OF_CELL_NUMBER                                      | -1.16 | 0.91 | 0 | 0 | 0 | not significant |
| 2632 | REACTOME_ESTROGEN_DEPENDENT_GENE_EXPRESSION                        | -1.16 | 0.88 | 0 | 0 | 0 | not significant |
| 2633 | GO_NEGATIVE_REGULATION_OF_NERVOUS_SYSTEM_DEVELOPMENT               | -1.16 | 0.85 | 0 | 0 | 0 | not significant |
| 2634 | GO_VESICLE_TARGETING_TO_FROM_OR_WITHIN_GOLGI                       | -1.16 | 0.79 | 0 | 0 | 0 | not significant |
| 2635 | GO_POSITIVE_REGULATION_OF_MITOTIC_CELL_CYCLE                       | -1.16 | 0.77 | 0 | 0 | 0 | not significant |
| 2636 | KEGG_NEUROTROPHIN_SIGNALING_PATHWAY                                | -1.16 | 0.76 | 0 | 0 | 0 | not significant |
| 2637 | GO_REGULATION_OF_CENTROSOME_CYCLE                                  | -1.16 | 0.72 | 0 | 0 | 0 | not significant |
| 2638 | RB_P130_DN_V1_UP                                                   | -1.16 | 0.72 | 0 | 0 | 0 | not significant |
| 2639 | GO_NUCLEOSIDE_TRIPHOSPHATE_METABOLIC_PROCESS                       | -1.16 | 0.69 | 0 | 0 | 0 | not significant |
| 2640 | GO_MEIOTIC_CHROMOSOME_SEGREGATION                                  | -1.16 | 0.68 | 0 | 0 | 0 | not significant |
| 2641 | GO_MATERNAL_PROCESS_INVOLVED_IN_FEMALE_PREGNANCY                   | -1.16 | 0.67 | 0 | 0 | 0 | not significant |
| 2642 | BIOCARTA_NFAT_PATHWAY                                              | -1.16 | 0.64 | 0 | 0 | 0 | not significant |
| 2643 | GO_POSITIVE_REGULATION_OF_TYROSINE_PHOSPHORYLATION_OF_STAT_PROTE   | -1.16 | 0.64 | 0 | 0 | 0 | not significant |
| 2644 | REACTOME_DNA_DAMAGE_RECOGNITION_IN_GG_NER                          | -1.16 | 0.64 | 0 | 0 | 0 | not significant |
| 2645 | BIOCARTA_MTOR_PATHWAY                                              | -1.16 | 0.63 | 0 | 0 | 0 | not significant |
| 2646 | GO_ESTROGEN_RECEPTOR_BINDING                                       | -1.16 | 0.63 | 0 | 0 | 0 | not significant |
| 2647 | GO_CIS_TRANS_ISOMERASE_ACTIVITY                                    | -1.16 | 0.62 | 0 | 0 | 0 | not significant |
| 2648 | SCHAEFFER_PROSTATE_DEVELOPMENT_AND_CANCER_BOX4_DN                  | -1.16 | 0.62 | 0 | 0 | 0 | not significant |
| 2649 | REACTOME_GASTRIN_CREB_SIGNALING_PATHWAY_VIA_PKC_AND_MAPK           | -1.16 | 0.6  | 0 | 0 | 0 | not significant |
| 2650 | BIOCARTA_STATHMIN_PATHWAY                                          | -1.16 | 0.59 | 0 | 0 | 0 | not significant |
| 2651 | GO_NEGATIVE_REGULATION_OF_CELL_MATRIX_ADHESION                     | -1.16 | 0.59 | 0 | 0 | 0 | not significant |
| 2652 | GO_NUCLEAR_PORE_ORGANIZATION                                       | -1.16 | 0.58 | 0 | 0 | 0 | not significant |
| 2653 | GO_POSITIVE_REGULATION_OF_TRANSLATIONAL_INITIATION                 | -1.16 | 0.58 | 0 | 0 | 0 | not significant |
| 2654 | GO_CALMODULIN_DEPENDENT_PROTEIN_KINASE_ACTIVITY                    | -1.16 | 0.57 | 0 | 0 | 0 | not significant |
| 2655 | GO_DENDRITE_EXTENSION                                              | -1.16 | 0.57 | 0 | 0 | 0 | not significant |
| 2656 | GO_PURINE_NUCLEOSIDE_MONOPHOSPHATE_METABOLIC_PROCESS               | -1.16 | 0.57 | 0 | 0 | 0 | not significant |
| 2657 | PETROVA_PROX1_TARGETS_UP                                           | -1.16 | 0.57 | 0 | 0 | 0 | not significant |
| 2658 | GO_TRANSLATION_PREINITIATION_COMPLEX                               | -1.16 | 0.56 | 0 | 0 | 0 | not significant |
| 2659 | GO_ENDOLYSOSOME_MEMBRANE                                           | -1.16 | 0.55 | 0 | 0 | 0 | not significant |
| 2660 | GO_MAMMARY_GLAND_DUCT_MORPHOGENESIS                                | -1.16 | 0.55 | 0 | 0 | 0 | not significant |
| 2661 | REACTOME_ESTABLISHMENT_OF_SISTER_CHROMATID_COHESION                | -1.16 | 0.55 | 0 | 0 | 0 | not significant |
| 2662 | GO_DETECTION_OF_TEMPERATURE_STIMULUS                               | -1.16 | 0.54 | 0 | 0 | 0 | not significant |
| 2663 | GO_REGULATION_OF_ATP_BIOSYNTHETIC_PROCESS                          | -1.16 | 0.54 | 0 | 0 | 0 | not significant |
| 2664 | BACOLOD_RESISTANCE_TO_ALKYLATING_AGENTS_UP                         | -1.16 | 0.53 | 0 | 0 | 0 | not significant |
| 2665 | GO_HISTONE_H2B_UBIQUITINATION                                      | -1.16 | 0.53 | 0 | 0 | 0 | not significant |
| 2666 | GO_VITAMIN_TRANSMEMBRANE_TRANSPORT                                 | -1.16 | 0.53 | 0 | 0 | 0 | not significant |
| 2667 | REACTOME_COHESIN_LOADING_ONTO_CHROMATIN                            | -1.16 | 0.53 | 0 | 0 | 0 | not significant |
| 2668 | ZEMBUTSU_SENSITIVITY_TO_DOXORUBICIN                                | -1.16 | 0.53 | 0 | 0 | 0 | not significant |
| 2669 | BIOCARTA_RNAPOL3_PATHWAY                                           | -1.16 | 0.52 | 0 | 0 | 0 | not significant |
| 2670 | GO_MATING_BEHAVIOR                                                 | -1.16 | 0.52 | 0 | 0 | 0 | not significant |
| 2671 | BIOCARTA_CCR3_PATHWAY                                              | -1.16 | 0.51 | 0 | 0 | 0 | not significant |
| 2672 | GO_F_ACTIN_CAPPING_PROTEIN_COMPLEX                                 | -1.16 | 0.51 | 0 | 0 | 0 | not significant |
| 2673 | GO_MITOCHONDRIAL_RESPIRATORY_CHAIN_COMPLEX_III_ASSEMBLY            | -1.16 | 0.5  | 0 | 0 | 0 | not significant |
| 2674 | GO_NEGATIVE_REGULATION_OF_AUTOPHAGOSOME_ASSEMBLY                   | -1.16 | 0.5  | 0 | 0 | 0 | not significant |
| 2675 | GO_NEGATIVE_REGULATION_OF_MYELINATION                              | -1.16 | 0.5  | 0 | 0 | 0 | not significant |
| 2676 | GO_NOSE_DEVELOPMENT                                                | -1.16 | 0.5  | 0 | 0 | 0 | not significant |
| 2677 | GO_POSITIVE_REGULATION_OF_MACROPHAGE_CHEMOTAXIS                    | -1.16 | 0.5  | 0 | 0 | 0 | not significant |
| 2678 | GO_INTRACELLULAR_DISTRIBUTION_OF_MITOCHONDRIA                      | -1.16 | 0.49 | 0 | 0 | 0 | not significant |
| 2679 | GO_STEREOCILUM_TIP                                                 | -1.16 | 0.49 | 0 | 0 | 0 | not significant |
| 2680 | GO_POSTTRANSLATIONAL_PROTEIN_TARGETING_TO_MEMBRANE_TRANSLCATION    | -1.16 | 0.48 | 0 | 0 | 0 | not significant |
| 2681 | BENPORATH_NANOG_TARGETS                                            | -1.15 | 4    | 0 | 0 | 0 | not significant |
| 2682 | GO_POSITIVE_REGULATION_OF_GENE_EXPRESSION                          | -1.15 | 4    | 0 | 0 | 0 | not significant |
| 2683 | GO_POSITIVE_REGULATION_OF_PROTEIN_METABOLIC_PROCESS                | -1.15 | 4    | 0 | 0 | 0 | not significant |
| 2684 | GRYDER_PAX3FOXO1_ENHANCERS_IN_TADS                                 | -1.15 | 1.83 | 0 | 0 | 0 | not significant |
| 2685 | GO_NEGATIVE_REGULATION_OF_TRANSCRIPTION_BY_RNA_POLYMERASE_II       | -1.15 | 1.67 | 0 | 0 | 0 | not significant |
| 2686 | GO_KINASE_ACTIVITY                                                 | -1.15 | 1.49 | 0 | 0 | 0 | not significant |
| 2687 | GO_GUANYL_NUCLEOTIDE_BINDING                                       | -1.15 | 1.12 | 0 | 0 | 0 | not significant |
| 2688 | GO_UBIQUITIN LIKE_PROTEIN_LIGASE_BINDING                           | -1.15 | 1.06 | 0 | 0 | 0 | not significant |
| 2689 | HALLMARK_OXIDATIVE_PHOSPHORYLATION                                 | -1.15 | 1.04 | 0 | 0 | 0 | not significant |
| 2690 | GO_POSITIVE_REGULATION_OF_NERVOUS_SYSTEM_DEVELOPMENT               | -1.15 | 1.03 | 0 | 0 | 0 | not significant |
| 2691 | GO_FOREBRAIN_DEVELOPMENT                                           | -1.15 | 0.96 | 0 | 0 | 0 | not significant |
| 2692 | TBK1_DF_DN                                                         | -1.15 | 0.95 | 0 | 0 | 0 | not significant |
| 2693 | GO_RHYTHMIC_PROCESS                                                | -1.15 | 0.91 | 0 | 0 | 0 | not significant |
| 2694 | KUMAR_PATHOGEN_LOAD_BY_MACROPHAGES                                 | -1.15 | 0.91 | 0 | 0 | 0 | not significant |
| 2695 | GO_PHOSPHATASE_ACTIVITY                                            | -1.15 | 0.89 | 0 | 0 | 0 | not significant |
| 2696 | GO_TRANSFERASE_ACTIVITY_TRANSFERRING_ONE_CARBON_GROUPS             | -1.15 | 0.89 | 0 | 0 | 0 | not significant |
| 2697 | GO_PROTEIN_TETRAMERIZATION                                         | -1.15 | 0.86 | 0 | 0 | 0 | not significant |
| 2698 | GO_POSITIVE_REGULATION_OF_CELLULAR_PROTEIN_CATABOLIC_PROCESS       | -1.15 | 0.82 | 0 | 0 | 0 | not significant |
| 2699 | GO_ATP_SYNTHESIS_COUPLED_ELECTRON_TRANSPORT                        | -1.15 | 0.74 | 0 | 0 | 0 | not significant |
| 2700 | GO_CELL_AGING                                                      | -1.15 | 0.73 | 0 | 0 | 0 | not significant |
| 2701 | GO_METAL_CLUSTER_BINDING                                           | -1.15 | 0.73 | 0 | 0 | 0 | not significant |
| 2702 | QUINTENS_EMBRYONIC_BRAIN_RESPONSE_TO_IR                            | -1.15 | 0.71 | 0 | 0 | 0 | not significant |
| 2703 | GO_HEART_GROWTH                                                    | -1.15 | 0.7  | 0 | 0 | 0 | not significant |
| 2704 | SAKAI_TUMOR_INFILTRATING_MONOCYTES_DN                              | -1.15 | 0.7  | 0 | 0 | 0 | not significant |
| 2705 | GO_SIGNAL_TRANSDUCTION_INVOLVED_IN_CELL_CYCLE_CHECKPOINT           | -1.15 | 0.69 | 0 | 0 | 0 | not significant |
| 2706 | CHR16P12                                                           | -1.15 | 0.67 | 0 | 0 | 0 | not significant |
| 2707 | REACTOME_TRANSCRIPTIONAL_REGULATION_OF_WHITE_ADIPOCYTE_DIFFERENTI  | -1.15 | 0.67 | 0 | 0 | 0 | not significant |
| 2708 | REACTOME_REGULATION_OF_MECP2_EXPRESSION_AND_ACTIVITY               | -1.15 | 0.63 | 0 | 0 | 0 | not significant |
| 2709 | GO_NEGATIVE_REGULATION_OF_CELL_SUBSTRATE_ADHESION                  | -1.15 | 0.62 | 0 | 0 | 0 | not significant |
| 2710 | REACTOME_GLYCOGEN_METABOLISM                                       | -1.15 | 0.62 | 0 | 0 | 0 | not significant |
| 2711 | GO_PHOSPHATIDYLINOSITOL_3_KINASE_COMPLEX                           | -1.15 | 0.6  | 0 | 0 | 0 | not significant |
| 2712 | GO_INTRA_GOLGI_VESICLE_MEDIATED_TRANSPORT                          | -1.15 | 0.59 | 0 | 0 | 0 | not significant |
| 2713 | BIOCARTA_INTEGRIN_PATHWAY                                          | -1.15 | 0.58 | 0 | 0 | 0 | not significant |

|      |                                                                    |       |      |   |   |   |                 |
|------|--------------------------------------------------------------------|-------|------|---|---|---|-----------------|
| 2714 | GO_SNRNA_3_END_PROCESSING                                          | -1.15 | 0.58 | 0 | 0 | 0 | not significant |
| 2715 | REACTOME_DISASSEMBLY_OF_THE_DESTRUCTION_COMPLEX_AND_RECRUITMENT    | -1.15 | 0.58 | 0 | 0 | 0 | not significant |
| 2716 | GO_POSITIVE_REGULATION_OF_LAMELLIPODIUM_ASSEMBLY                   | -1.15 | 0.57 | 0 | 0 | 0 | not significant |
| 2717 | GO_ACTIVATION_OF_ADENYLATE_CYCLASE_ACTIVITY                        | -1.15 | 0.55 | 0 | 0 | 0 | not significant |
| 2718 | GO_POSITIVE_REGULATION_OF_CYTOKINE_PRODUCTION_INVOLVED_IN_INFLAMMA | -1.15 | 0.54 | 0 | 0 | 0 | not significant |
| 2719 | GU_PDEF_TARGETS_DN                                                 | -1.15 | 0.54 | 0 | 0 | 0 | not significant |
| 2720 | MORI_EMU_MYC_LYMPHOMA_BY_ONSET_TIME_DN                             | -1.15 | 0.54 | 0 | 0 | 0 | not significant |
| 2721 | REACTOME_MITOCHONDRIAL_IRON_SULFUR_CLUSTER_BIOGENESIS              | -1.15 | 0.54 | 0 | 0 | 0 | not significant |
| 2722 | GO_CLATHRIN_COATED_ENDOCYTTIC_VESICLE_MEMBRANE                     | -1.15 | 0.53 | 0 | 0 | 0 | not significant |
| 2723 | GO_HAIR_FOLLICLE_MATURATION                                        | -1.15 | 0.53 | 0 | 0 | 0 | not significant |
| 2724 | GO_RENAL_SYSTEM_VASCULATURE_DEVELOPMENT                            | -1.15 | 0.53 | 0 | 0 | 0 | not significant |
| 2725 | REACTOME_E2F_ENABLED_INHIBITION_OF_PRE_REPLICATION_COMPLEX_FORMAT  | -1.15 | 0.53 | 0 | 0 | 0 | not significant |
| 2726 | GO_DETECTION_OF_TEMPERATURE_STIMULUS_INVOLVED_IN_SENSORY_PERCEPT   | -1.15 | 0.52 | 0 | 0 | 0 | not significant |
| 2727 | GO_LEUCINE_ZIPPER_DOMAIN_BINDING                                   | -1.15 | 0.52 | 0 | 0 | 0 | not significant |
| 2728 | GO_NEGATIVE_REGULATION_OF_MRNA_3_END_PROCESSING                    | -1.15 | 0.52 | 0 | 0 | 0 | not significant |
| 2729 | GO_RNA_POLYMERASE_I_CORE_BINDING                                   | -1.15 | 0.52 | 0 | 0 | 0 | not significant |
| 2730 | GO_EMBRYONIC_BODY_MORPHOGENESIS                                    | -1.15 | 0.51 | 0 | 0 | 0 | not significant |
| 2731 | GO_PEPTIDE_ALPHA_N_ACETYLTTRANSFERASE_ACTIVITY                     | -1.15 | 0.51 | 0 | 0 | 0 | not significant |
| 2732 | SCHAEFFER_PROSTATE_DEVELOPMENT_AND_CANCER_BOX4_UP                  | -1.15 | 0.51 | 0 | 0 | 0 | not significant |
| 2733 | GO_MONOUBIQUITINATED_PROTEIN_DEUBIQUITINATION                      | -1.15 | 0.5  | 0 | 0 | 0 | not significant |
| 2734 | GO_OUTER_MITOCHONDRIAL_MEMBRANE_PROTEIN_COMPLEX                    | -1.15 | 0.5  | 0 | 0 | 0 | not significant |
| 2735 | BIOCARTA_RAB_PATHWAY                                               | -1.15 | 0.49 | 0 | 0 | 0 | not significant |
| 2736 | GO_MRNA_5_SPLICE_SITE_RECOGNITION                                  | -1.15 | 0.49 | 0 | 0 | 0 | not significant |
| 2737 | GO_POSITIVE_REGULATION_OF_CARDIAC_MUSCLE_CELL_PROLIFERATION        | -1.15 | 0.49 | 0 | 0 | 0 | not significant |
| 2738 | GO_PROSTATE_GLAND_MORPHOGENESIS                                    | -1.15 | 0.49 | 0 | 0 | 0 | not significant |
| 2739 | GO_REGULATION_OF_MIRNA_METABOLIC_PROCESS                           | -1.15 | 0.49 | 0 | 0 | 0 | not significant |
| 2740 | GO_TRNA_SPLICING_LIGASE_COMPLEX                                    | -1.15 | 0.49 | 0 | 0 | 0 | not significant |
| 2741 | LANDEMAINE_LUNG_METASTASIS                                         | -1.15 | 0.49 | 0 | 0 | 0 | not significant |
| 2742 | GO_CARBOHYDRATE_PHOSPHATASE_ACTIVITY                               | -1.15 | 0.48 | 0 | 0 | 0 | not significant |
| 2743 | GO_CELLULAR_RESPONSE_TO_BRAIN_DERIVED_NEUROTROPHIC_FACTOR_STIMULI  | -1.15 | 0.48 | 0 | 0 | 0 | not significant |
| 2744 | GO_LIPASE_ACTIVATOR_ACTIVITY                                       | -1.15 | 0.48 | 0 | 0 | 0 | not significant |
| 2745 | GO_PHOSPHOLIPASE_ACTIVATOR_ACTIVITY                                | -1.15 | 0.48 | 0 | 0 | 0 | not significant |
| 2746 | GO_REGULATION_OF_CALCIIUM_TRANSPORTING_ATPASE_ACTIVITY             | -1.15 | 0.48 | 0 | 0 | 0 | not significant |
| 2747 | REACTOME_CASPASE_ACTIVATION_VIA_DEPENDENCE_RECEPTORS_IN_THE_ABSE   | -1.15 | 0.48 | 0 | 0 | 0 | not significant |
| 2748 | GO_BASEMENT_MEMBRANE_ASSEMBLY                                      | -1.15 | 0.45 | 0 | 0 | 0 | not significant |
| 2749 | GO_MITOCHONDRION                                                   | -1.14 | 4    | 0 | 0 | 0 | not significant |
| 2750 | REACTOME_DISEASE                                                   | -1.14 | 1.76 | 0 | 0 | 0 | not significant |
| 2751 | GO_POSITIVE_REGULATION_OF_PHOSPHORUS_METABOLIC_PROCESS             | -1.14 | 1.73 | 0 | 0 | 0 | not significant |
| 2752 | GO_POSITIVE_REGULATION_OF_CATALYTIC_ACTIVITY                       | -1.14 | 1.7  | 0 | 0 | 0 | not significant |
| 2753 | GO_REGULATION_OF_PROTEOLYSIS                                       | -1.14 | 1.26 | 0 | 0 | 0 | not significant |
| 2754 | GO_REGULATION_OF_CELL_DEVELOPMENT                                  | -1.14 | 1.18 | 0 | 0 | 0 | not significant |
| 2755 | CHARAFE_BREAST_CANCER_LUMINAL_VS_MESENCHYMAL_DN                    | -1.14 | 1.05 | 0 | 0 | 0 | not significant |
| 2756 | GO_POST_TRANSLATIONAL_PROTEIN_MODIFICATION                         | -1.14 | 0.91 | 0 | 0 | 0 | not significant |
| 2757 | REACTOME_MITOTIC_G1_S_G2_PHASES                                    | -1.14 | 0.83 | 0 | 0 | 0 | not significant |
| 2758 | GO_NUCLEAR_TRANSCRIPTION_FACTOR_COMPLEX                            | -1.14 | 0.82 | 0 | 0 | 0 | not significant |
| 2759 | GO_NEGATIVE_REGULATION_OF_NUCLEOBASE_CONTAINING_COMPOUND_METABO    | -1.14 | 0.79 | 0 | 0 | 0 | not significant |
| 2760 | REACTOME_DNA_REPLICATION_PRE_INITIATION                            | -1.14 | 0.75 | 0 | 0 | 0 | not significant |
| 2761 | GO_MEIOTIC_CELL_CYCLE                                              | -1.14 | 0.74 | 0 | 0 | 0 | not significant |
| 2762 | CHR1P35                                                            | -1.14 | 0.68 | 0 | 0 | 0 | not significant |
| 2763 | GO_POSITIVE_REGULATION_OF_UBIQUITIN_DEPENDENT_PROTEIN_CATABOLIC_PR | -1.14 | 0.68 | 0 | 0 | 0 | not significant |
| 2764 | GO_REGULATION_OF_PROTEIN_LOCALIZATION_TO_PLASMA_MEMBRANE           | -1.14 | 0.68 | 0 | 0 | 0 | not significant |
| 2765 | GO_RESPONSE_TO_ALKALOID                                            | -1.14 | 0.68 | 0 | 0 | 0 | not significant |
| 2766 | REACTOME_PL_METABOLISM                                             | -1.14 | 0.68 | 0 | 0 | 0 | not significant |
| 2767 | SESTO_RESPONSE_TO_UV_C7                                            | -1.14 | 0.68 | 0 | 0 | 0 | not significant |
| 2768 | ZHAN_V2_LATE_DIFFERENTIATION_GENES                                 | -1.14 | 0.67 | 0 | 0 | 0 | not significant |
| 2769 | FONTAINE_FOLLICULAR_THYROID_ADENOMA_DN                             | -1.14 | 0.64 | 0 | 0 | 0 | not significant |
| 2770 | GO_PROTEIN_TRANSPORT_ALONG_MICROTUBULE                             | -1.14 | 0.64 | 0 | 0 | 0 | not significant |
| 2771 | GO_RESPONSE_TO_AMMONIUM_ION                                        | -1.14 | 0.63 | 0 | 0 | 0 | not significant |
| 2772 | BIOCARTA_TNFR1_PATHWAY                                             | -1.14 | 0.6  | 0 | 0 | 0 | not significant |
| 2773 | GO_NUCLEOSIDE_MONOPHOSPHATE_BIOSYNTHETIC_PROCESS                   | -1.14 | 0.6  | 0 | 0 | 0 | not significant |
| 2774 | GO_POSITIVE_REGULATION_OF_VIRAL_LIFE_CYCLE                         | -1.14 | 0.6  | 0 | 0 | 0 | not significant |
| 2775 | GO_ASTROCYTE_DIFFERENTIATION                                       | -1.14 | 0.59 | 0 | 0 | 0 | not significant |
| 2776 | LIN_MELANOMA_COPY_NUMBER_DN                                        | -1.14 | 0.59 | 0 | 0 | 0 | not significant |
| 2777 | GO_CEREBELLAR_CORTEX_DEVELOPMENT                                   | -1.14 | 0.58 | 0 | 0 | 0 | not significant |
| 2778 | GO_DYNEIN_COMPLEX                                                  | -1.14 | 0.58 | 0 | 0 | 0 | not significant |
| 2779 | GO_ENDOCHONDRAL_BONE_MORPHOGENESIS                                 | -1.14 | 0.58 | 0 | 0 | 0 | not significant |
| 2780 | SNUDERS_AMPLIFIED_IN_HEAD_AND_NECK_TUMORS                          | -1.14 | 0.57 | 0 | 0 | 0 | not significant |
| 2781 | GO_EPITHELIAL_CELL_DIFFERENTIATION_INVOLVED_IN_KIDNEY_DEVELOPMENT  | -1.14 | 0.56 | 0 | 0 | 0 | not significant |
| 2782 | WHITEHURST_PACLITAXEL_SENSITIVITY                                  | -1.14 | 0.56 | 0 | 0 | 0 | not significant |
| 2783 | YH_RESPONSE_TO_ARSENITE_C3                                         | -1.14 | 0.56 | 0 | 0 | 0 | not significant |
| 2784 | GO_MITOCHONDRIAL_CALCIIUM_ION_TRANSMEMBRANE_TRANSPORT              | -1.14 | 0.55 | 0 | 0 | 0 | not significant |
| 2785 | GO_NURD_COMPLEX                                                    | -1.14 | 0.55 | 0 | 0 | 0 | not significant |
| 2786 | GO_PHOSPHATIDYLINOSITOL_3_KINASE_REGULATOR_ACTIVITY                | -1.14 | 0.55 | 0 | 0 | 0 | not significant |
| 2787 | GO_CELLULAR_RESPONSE_TO_PROSTAGLANDIN_STIMULUS                     | -1.14 | 0.54 | 0 | 0 | 0 | not significant |
| 2788 | PID_SYNDECAN_4_PATHWAY                                             | -1.14 | 0.54 | 0 | 0 | 0 | not significant |
| 2789 | REACTOME_VEGFR2_MEDIATED_CELL_PROLIFERATION                        | -1.14 | 0.54 | 0 | 0 | 0 | not significant |
| 2790 | GO_REGULATION_OF_PLATELET_ACTIVATION                               | -1.14 | 0.53 | 0 | 0 | 0 | not significant |
| 2791 | KEGG_BETA_ALANINE_METABOLISM                                       | -1.14 | 0.53 | 0 | 0 | 0 | not significant |
| 2792 | CHR14Q31                                                           | -1.14 | 0.52 | 0 | 0 | 0 | not significant |
| 2793 | GO_GROWTH_CONE_PART                                                | -1.14 | 0.52 | 0 | 0 | 0 | not significant |
| 2794 | GO_NUCLEAR_CYCLIN_DEPENDENT_PROTEIN_KINASE_HOLOENZYME_COMPLEX      | -1.14 | 0.52 | 0 | 0 | 0 | not significant |
| 2795 | CHANG_POU5F1_TARGETS_DN                                            | -1.14 | 0.51 | 0 | 0 | 0 | not significant |
| 2796 | GO_CLATHRIN_COMPLEX                                                | -1.14 | 0.51 | 0 | 0 | 0 | not significant |
| 2797 | GO_EPITHELIAL_CELL_CELL_ADHESION                                   | -1.14 | 0.51 | 0 | 0 | 0 | not significant |
| 2798 | GO_NEUROTRANSMITTER_CATABOLIC_PROCESS                              | -1.14 | 0.51 | 0 | 0 | 0 | not significant |
| 2799 | PARK_HSC_VS_MULTIPOTENT_PROGENITORS_DN                             | -1.14 | 0.51 | 0 | 0 | 0 | not significant |
| 2800 | RAMPON_ENRICHED_LEARNING_ENVIRONMENT_EARLY_DN                      | -1.14 | 0.51 | 0 | 0 | 0 | not significant |
| 2801 | REACTOME_SEMA3A_PAK_DEPENDENT_AXON_REPULSION                       | -1.14 | 0.51 | 0 | 0 | 0 | not significant |
| 2802 | BIOCARTA_HIF_PATHWAY                                               | -1.14 | 0.5  | 0 | 0 | 0 | not significant |
| 2803 | REACTOME_MECP2_REGULATES_NEURONAL_RECEPTORS_AND_CHANNELS           | -1.14 | 0.5  | 0 | 0 | 0 | not significant |
| 2804 | SCHURINGA_STATS4_TARGETS_UP                                        | -1.14 | 0.5  | 0 | 0 | 0 | not significant |
| 2805 | GO_FOREBRAIN_NEURON_DEVELOPMENT                                    | -1.14 | 0.49 | 0 | 0 | 0 | not significant |
| 2806 | GO_LAMELLIPODIUM_MORPHOGENESIS                                     | -1.14 | 0.49 | 0 | 0 | 0 | not significant |
| 2807 | GO_POSITIVE_REGULATION_OF_ATP_BIOSYNTHETIC_PROCESS                 | -1.14 | 0.49 | 0 | 0 | 0 | not significant |
| 2808 | GO_RETINOID_X_RECEPTOR_BINDING                                     | -1.14 | 0.49 | 0 | 0 | 0 | not significant |
| 2809 | GO_CYTIDYLTRANSFERASE_ACTIVITY                                     | -1.14 | 0.48 | 0 | 0 | 0 | not significant |
| 2810 | GO_ECTODERMAL_PLACODE_DEVELOPMENT                                  | -1.14 | 0.48 | 0 | 0 | 0 | not significant |
| 2811 | GO_CENTRIOLAR_SUBDISTAL_APPENDAGE                                  | -1.14 | 0.47 | 0 | 0 | 0 | not significant |
| 2812 | GO_POSTSYNAPTIC_MODULATION_OF_CHEMICAL_SYNAPTIC_TRANSMISSION       | -1.14 | 0.47 | 0 | 0 | 0 | not significant |
| 2813 | GO_BLASTODERM_SEGMENTATION                                         | -1.14 | 0.45 | 0 | 0 | 0 | not significant |
| 2814 | GO_SATELLITE_DNA_BINDING                                           | -1.14 | 0.44 | 0 | 0 | 0 | not significant |
| 2815 | GO_REGULATION_OF_PHOSPHORUS_METABOLIC_PROCESS                      | -1.13 | 1.55 | 0 | 0 | 0 | not significant |
| 2816 | DOUGLAS_BM1_TARGETS_UP                                             | -1.13 | 1.12 | 0 | 0 | 0 | not significant |
| 2817 | GABRIELY_MIR21_TARGETS                                             | -1.13 | 1.11 | 0 | 0 | 0 | not significant |
| 2818 | GO_REGULATION_OF_GENE_EXPRESSION_EPIGENETIC                        | -1.13 | 1.05 | 0 | 0 | 0 | not significant |
| 2819 | GO_REGULATION_OF_NEURON_DIFFERENTIATION                            | -1.13 | 1.03 | 0 | 0 | 0 | not significant |
| 2820 | VANTVEER_BREAST_CANCER_ESR1_DN                                     | -1.13 | 0.86 | 0 | 0 | 0 | not significant |
| 2821 | REACTOME_S_PHASE                                                   | -1.13 | 0.81 | 0 | 0 | 0 | not significant |
| 2822 | SHEPARD_BMYB_MORPHOLINO_DN                                         | -1.13 | 0.77 | 0 | 0 | 0 | not significant |

|      |                                                                   |       |      |   |   |   |                 |
|------|-------------------------------------------------------------------|-------|------|---|---|---|-----------------|
| 2823 | DARWICHE_SQUAMOUS_CELL_CARCINOMA_UP                               | -1.13 | 0.76 | 0 | 0 | 0 | not significant |
| 2824 | HALLMARK_UNFOLDED_PROTEIN_RESPONSE                                | -1.13 | 0.76 | 0 | 0 | 0 | not significant |
| 2825 | HOSHIDA_LIVER_CANCER_SUBCLASS_S2                                  | -1.13 | 0.72 | 0 | 0 | 0 | not significant |
| 2826 | GO_ISOMERASE_ACTIVITY                                             | -1.13 | 0.71 | 0 | 0 | 0 | not significant |
| 2827 | GO_REGULATION_OF_RECEPTOR_MEDIATED_ENDOCYTOSIS                    | -1.13 | 0.67 | 0 | 0 | 0 | not significant |
| 2828 | BYSTRYKH_HEMATOPOIESIS_STEM_CELL_AND_BRAIN_QTL_TRANS              | -1.13 | 0.66 | 0 | 0 | 0 | not significant |
| 2829 | GO_COPII_COATED_VESICLE_BUDDING                                   | -1.13 | 0.66 | 0 | 0 | 0 | not significant |
| 2830 | NABA_SECRETED_FACTORS                                             | -1.13 | 0.66 | 0 | 0 | 0 | not significant |
| 2831 | WANG_ESOPHAGUS_CANCER_VS_NORMAL_DN                                | -1.13 | 0.65 | 0 | 0 | 0 | not significant |
| 2832 | PID_ATR_PATHWAY                                                   | -1.13 | 0.64 | 0 | 0 | 0 | not significant |
| 2833 | WNT_SIGNALING                                                     | -1.13 | 0.64 | 0 | 0 | 0 | not significant |
| 2834 | PID_ERBB1_INTERNALIZATION_PATHWAY                                 | -1.13 | 0.63 | 0 | 0 | 0 | not significant |
| 2835 | SHEDDEN_LUNG_CANCER_GOOD_SURVIVAL_A5                              | -1.13 | 0.63 | 0 | 0 | 0 | not significant |
| 2836 | GO_MESODERM_DEVELOPMENT                                           | -1.13 | 0.62 | 0 | 0 | 0 | not significant |
| 2837 | GO_REGULATION_OF_PROTEIN_IMPORT                                   | -1.13 | 0.62 | 0 | 0 | 0 | not significant |
| 2838 | GO_RECEPTOR_INTERNALIZATION                                       | -1.13 | 0.61 | 0 | 0 | 0 | not significant |
| 2839 | GO_RNA_POLYMERASE_BINDING                                         | -1.13 | 0.61 | 0 | 0 | 0 | not significant |
| 2840 | GO_MYELIN_SHEATH                                                  | -1.13 | 0.6  | 0 | 0 | 0 | not significant |
| 2841 | PID_SHP2_PATHWAY                                                  | -1.13 | 0.59 | 0 | 0 | 0 | not significant |
| 2842 | GO_MIRNA_BINDING                                                  | -1.13 | 0.58 | 0 | 0 | 0 | not significant |
| 2843 | BIOCARTA_MEF2D_PATHWAY                                            | -1.13 | 0.55 | 0 | 0 | 0 | not significant |
| 2844 | GO_OXIDOREDUCTASE_ACTIVITY_ACTING_ON_THE_ALDEHYDE_OR_OXO_GROUP_   | -1.13 | 0.55 | 0 | 0 | 0 | not significant |
| 2845 | HOFMANN_MYELODYSPLASTIC_SYNDROM_LOW_RISK_UP                       | -1.13 | 0.54 | 0 | 0 | 0 | not significant |
| 2846 | GO_NEGATIVE_REGULATION_OF_SMOOTHENED_SIGNALING_PATHWAY            | -1.13 | 0.53 | 0 | 0 | 0 | not significant |
| 2847 | GO_PRE_MRNA_BINDING                                               | -1.13 | 0.53 | 0 | 0 | 0 | not significant |
| 2848 | PID_CDC42_REG_PATHWAY                                             | -1.13 | 0.53 | 0 | 0 | 0 | not significant |
| 2849 | GO_POSITIVE_REGULATION_OF_PHOSPHATASE_ACTIVITY                    | -1.13 | 0.52 | 0 | 0 | 0 | not significant |
| 2850 | MARCINIAK_ER_STRESS_RESPONSE_VIA_CHOP                             | -1.13 | 0.52 | 0 | 0 | 0 | not significant |
| 2851 | GO_NEURONAL_STEM_CELL_POPULATION_MAINTENANCE                      | -1.13 | 0.51 | 0 | 0 | 0 | not significant |
| 2852 | GO_REGULATION_OF_DIGESTIVE_SYSTEM_PROCESS                         | -1.13 | 0.51 | 0 | 0 | 0 | not significant |
| 2853 | GO_REGULATION_OF_RIBONUCLEASE_ACTIVITY                            | -1.13 | 0.51 | 0 | 0 | 0 | not significant |
| 2854 | GO_GOLGI_LOCALIZATION                                             | -1.13 | 0.49 | 0 | 0 | 0 | not significant |
| 2855 | MAINA_VHL_TARGETS_DN                                              | -1.13 | 0.49 | 0 | 0 | 0 | not significant |
| 2856 | KEGG_NON_HOMOLOGOUS_END_JOINING                                   | -1.13 | 0.48 | 0 | 0 | 0 | not significant |
| 2857 | CHRXG11                                                           | -1.13 | 0.47 | 0 | 0 | 0 | not significant |
| 2858 | GO_AXONEMAL_DYNEIN_COMPLEX_ASSEMBLY                               | -1.13 | 0.47 | 0 | 0 | 0 | not significant |
| 2859 | GO_PURINE_NUCLEOSIDE_DIPHOSPHATE_BIOSYNTHETIC_PROCESS             | -1.13 | 0.47 | 0 | 0 | 0 | not significant |
| 2860 | GO_REGULATION_OF_HISTONE_UBIQUITINATION                           | -1.13 | 0.47 | 0 | 0 | 0 | not significant |
| 2861 | HAHTOLA_MYCOSIS_FUNGOIDES_UP                                      | -1.13 | 0.47 | 0 | 0 | 0 | not significant |
| 2862 | GO_ALDEHYDE_BIOSYNTHETIC_PROCESS                                  | -1.13 | 0.46 | 0 | 0 | 0 | not significant |
| 2863 | GO_INTRAMOLECULAR_TRANSFERASE_ACTIVITY_PHOSPHOTRANSFERASES        | -1.13 | 0.46 | 0 | 0 | 0 | not significant |
| 2864 | GO_POSITIVE_REGULATION_OF_GONAD_DEVELOPMENT                       | -1.13 | 0.46 | 0 | 0 | 0 | not significant |
| 2865 | GO_REGULATION_OF_LOW_DENSITY_LIPOPROTEIN_PARTICLE_CLEARANCE       | -1.13 | 0.46 | 0 | 0 | 0 | not significant |
| 2866 | REACTOME_MET_RECEPTOR_RECYCLING                                   | -1.13 | 0.46 | 0 | 0 | 0 | not significant |
| 2867 | GO_REGULATION_OF_HIGH_VOLTAGE_GATED_CALCIUM_CHANNEL_ACTIVITY      | -1.13 | 0.45 | 0 | 0 | 0 | not significant |
| 2868 | GO_RIBOSOMAL_PROTEIN_S6_KINASE_ACTIVITY                           | -1.13 | 0.45 | 0 | 0 | 0 | not significant |
| 2869 | GO_TRANSLATION_ACTIVATOR_ACTIVITY                                 | -1.13 | 0.45 | 0 | 0 | 0 | not significant |
| 2870 | GO_TRNA_PSEUDOURIDINE_SYNTHESIS                                   | -1.13 | 0.45 | 0 | 0 | 0 | not significant |
| 2871 | GO_REGULATION_OF_PROTEIN_LOCALIZATION_TO_CHROMATIN                | -1.13 | 0.44 | 0 | 0 | 0 | not significant |
| 2872 | MATZUK_EMBRYONIC_GERM_CELL                                        | -1.13 | 0.44 | 0 | 0 | 0 | not significant |
| 2873 | GO_REGULATION_OF_T_CIRCLE_FORMATION                               | -1.13 | 0.43 | 0 | 0 | 0 | not significant |
| 2874 | REACTOME_RUNX1_REGULATES_TRANSCRIPTION_OF_GENES_INVOLVED_IN_DIFFE | -1.13 | 0.43 | 0 | 0 | 0 | not significant |
| 2875 | GO_POSITIVE_REGULATION_OF_PROTEIN_MODIFICATION_PROCESS            | -1.12 | 1.85 | 0 | 0 | 0 | not significant |
| 2876 | GO_MOLECULAR_FUNCTION_REGULATOR                                   | -1.12 | 1.73 | 0 | 0 | 0 | not significant |
| 2877 | GO_REGULATION_OF_TRANSFERASE_ACTIVITY                             | -1.12 | 1.44 | 0 | 0 | 0 | not significant |
| 2878 | REACTOME_SIGNALING_BY_INTERLEUKINS                                | -1.12 | 1.03 | 0 | 0 | 0 | not significant |
| 2879 | GO_NEGATIVE_REGULATION_OF_PHOSPHORYLATION                         | -1.12 | 0.98 | 0 | 0 | 0 | not significant |
| 2880 | GO_ENZYME_ACTIVATOR_ACTIVITY                                      | -1.12 | 0.95 | 0 | 0 | 0 | not significant |
| 2881 | GO_POSITIVE_REGULATION_OF_CELLULAR_COMPONENT_BIOGENESIS           | -1.12 | 0.9  | 0 | 0 | 0 | not significant |
| 2882 | GO_CYTOSOLIC_PART                                                 | -1.12 | 0.89 | 0 | 0 | 0 | not significant |
| 2883 | FARMER_BREAST_CANCER_APOCRINE_VS_BASAL                            | -1.12 | 0.78 | 0 | 0 | 0 | not significant |
| 2884 | GO_POSITIVE_REGULATION_OF_GROWTH                                  | -1.12 | 0.75 | 0 | 0 | 0 | not significant |
| 2885 | GO_T_CELL_RECEPTOR_SIGNALING_PATHWAY                              | -1.12 | 0.74 | 0 | 0 | 0 | not significant |
| 2886 | ESC_J1_UP_LATE.V1_DN                                              | -1.12 | 0.71 | 0 | 0 | 0 | not significant |
| 2887 | GARGALOVIC_RESPONSE_TO_OXIDIZED_PHOSPHOLIPIDS_BLUE_UP             | -1.12 | 0.69 | 0 | 0 | 0 | not significant |
| 2888 | GO_NUCLEOSOME_BINDING                                             | -1.12 | 0.68 | 0 | 0 | 0 | not significant |
| 2889 | GO_MUSCLE_CELL_PROLIFERATION                                      | -1.12 | 0.67 | 0 | 0 | 0 | not significant |
| 2890 | GO_UBIQUITIN_LIKE_PROTEIN_SPECIFIC_PROTEASE_ACTIVITY              | -1.12 | 0.67 | 0 | 0 | 0 | not significant |
| 2891 | GO_STRIATED_MUSCLE_CONTRACTION                                    | -1.12 | 0.64 | 0 | 0 | 0 | not significant |
| 2892 | GO_CELLULAR_RESPONSE_TO_LIGHT_STIMULUS                            | -1.12 | 0.61 | 0 | 0 | 0 | not significant |
| 2893 | GO_REGULATION_OF_MICROTUBULE_POLYMERIZATION_OR_DEPOLYMERIZATION   | -1.12 | 0.6  | 0 | 0 | 0 | not significant |
| 2894 | PID_AR_PATHWAY                                                    | -1.12 | 0.6  | 0 | 0 | 0 | not significant |
| 2895 | GO_METENCEPHALON_DEVELOPMENT                                      | -1.12 | 0.59 | 0 | 0 | 0 | not significant |
| 2896 | GO_OOGENESIS                                                      | -1.12 | 0.59 | 0 | 0 | 0 | not significant |
| 2897 | GO_REGULATION_OF_ADHERENS_JUNCTION_ORGANIZATION                   | -1.12 | 0.59 | 0 | 0 | 0 | not significant |
| 2898 | GO_REGULATION_OF_CELLULAR_RESPONSE_TO_TRANSFORMING_GROWTH_FAC     | -1.12 | 0.59 | 0 | 0 | 0 | not significant |
| 2899 | GO_ORGANIC_HYDROXY_COMPOUND_CATABOLIC_PROCESS                     | -1.12 | 0.58 | 0 | 0 | 0 | not significant |
| 2900 | POMEROY_MEDULLOBLASTOMA_DESMOPLASIC_VS_CLASSIC_UP                 | -1.12 | 0.57 | 0 | 0 | 0 | not significant |
| 2901 | GO_ADULT_LOCOMOTORY_BEHAVIOR                                      | -1.12 | 0.56 | 0 | 0 | 0 | not significant |
| 2902 | GO_MICROTUBULE_BUNDLE_FORMATION                                   | -1.12 | 0.56 | 0 | 0 | 0 | not significant |
| 2903 | GO_RESPONSE_TO_ESTROGEN                                           | -1.12 | 0.56 | 0 | 0 | 0 | not significant |
| 2904 | CHR19P12                                                          | -1.12 | 0.55 | 0 | 0 | 0 | not significant |
| 2905 | GO_KINESIN_BINDING                                                | -1.12 | 0.55 | 0 | 0 | 0 | not significant |
| 2906 | GO_POSITIVE_REGULATION_OF_SUBSTRATE_ADHESION_DEPENDENT_CELL_SPRE  | -1.12 | 0.55 | 0 | 0 | 0 | not significant |
| 2907 | BEIER_GLIOMA_STEM_CELL_UP                                         | -1.12 | 0.54 | 0 | 0 | 0 | not significant |
| 2908 | GO_ALCOHOL_CATABOLIC_PROCESS                                      | -1.12 | 0.53 | 0 | 0 | 0 | not significant |
| 2909 | GO_LIVER_REGENERATION                                             | -1.12 | 0.53 | 0 | 0 | 0 | not significant |
| 2910 | GO_POSITIVE_REGULATION_OF_RECEPTOR_MEDIATED_ENDOCYTOSIS           | -1.12 | 0.53 | 0 | 0 | 0 | not significant |
| 2911 | GO_STEM_CELL_DIVISION                                             | -1.12 | 0.53 | 0 | 0 | 0 | not significant |
| 2912 | WU_HBX_TARGETS_3_UP                                               | -1.12 | 0.53 | 0 | 0 | 0 | not significant |
| 2913 | BIOCARTA_CREB_PATHWAY                                             | -1.12 | 0.52 | 0 | 0 | 0 | not significant |
| 2914 | CHR2P15                                                           | -1.12 | 0.52 | 0 | 0 | 0 | not significant |
| 2915 | GO_CYTOKINETIC_PROCESS                                            | -1.12 | 0.52 | 0 | 0 | 0 | not significant |
| 2916 | GO_DNA_BINDING_BENDING                                            | -1.12 | 0.51 | 0 | 0 | 0 | not significant |
| 2917 | GO_SYNAPTONEMAL_COMPLEX_ORGANIZATION                              | -1.12 | 0.51 | 0 | 0 | 0 | not significant |
| 2918 | GO_PYRIMIDINE_RIBONUCLEOTIDE_BIOSYNTHETIC_PROCESS                 | -1.12 | 0.5  | 0 | 0 | 0 | not significant |
| 2919 | GO_TAU_PROTEIN_KINASE_ACTIVITY                                    | -1.12 | 0.5  | 0 | 0 | 0 | not significant |
| 2920 | WILLERT_WNT_SIGNALING                                             | -1.12 | 0.5  | 0 | 0 | 0 | not significant |
| 2921 | WHITE_NEUROBLASTOMA_WITH_1P36.3_DELETION                          | -1.12 | 0.49 | 0 | 0 | 0 | not significant |
| 2922 | BIOCARTA_GSK3_PATHWAY                                             | -1.12 | 0.48 | 0 | 0 | 0 | not significant |
| 2923 | BOYERINAS_ONCOFETAL_TARGETS_OF_LET7A1                             | -1.12 | 0.48 | 0 | 0 | 0 | not significant |
| 2924 | GO_TRNA_TRANSCRIPTION                                             | -1.12 | 0.48 | 0 | 0 | 0 | not significant |
| 2925 | BIOCARTA_IRES_PATHWAY                                             | -1.12 | 0.47 | 0 | 0 | 0 | not significant |
| 2926 | CHR5Q34                                                           | -1.12 | 0.47 | 0 | 0 | 0 | not significant |
| 2927 | GO_CAMP_DEPENDENT_PROTEIN_KINASE_COMPLEX                          | -1.12 | 0.47 | 0 | 0 | 0 | not significant |
| 2928 | GO_CELLULAR_RESPONSE_TO_PROSTAGLANDIN_E_STIMULUS                  | -1.12 | 0.47 | 0 | 0 | 0 | not significant |
| 2929 | GO_EXOCYST                                                        | -1.12 | 0.47 | 0 | 0 | 0 | not significant |
| 2930 | GO_NEGATIVE_REGULATION_BY_HOST_OF_VIRAL_TRANSCRIPTION             | -1.12 | 0.47 | 0 | 0 | 0 | not significant |
| 2931 | GO_NEGATIVE_REGULATION_OF_CALCIUM_ION_DEPENDENT_EXOCYTOSIS        | -1.12 | 0.46 | 0 | 0 | 0 | not significant |

|      |                                                                        |       |      |   |   |   |                 |
|------|------------------------------------------------------------------------|-------|------|---|---|---|-----------------|
| 2932 | GO_S100_PROTEIN_BINDING                                                | -1.12 | 0.46 | 0 | 0 | 0 | not significant |
| 2933 | REACTOME_NONCANONICAL_ACTIVATION_OF_NOTCH3                             | -1.12 | 0.46 | 0 | 0 | 0 | not significant |
| 2934 | GO_EMBRYONIC_VISCEROCRANIUM_MORPHOGENESIS                              | -1.12 | 0.45 | 0 | 0 | 0 | not significant |
| 2935 | GO_LONG_CHAIN_FATTY_ACID_TRANSPORTER_ACTIVITY                          | -1.12 | 0.45 | 0 | 0 | 0 | not significant |
| 2936 | GO_MRE11_COMPLEX                                                       | -1.12 | 0.45 | 0 | 0 | 0 | not significant |
| 2937 | GO_NEGATIVE_REGULATION_OF_MEGAKARYOCYTE_DIFFERENTIATION                | -1.12 | 0.45 | 0 | 0 | 0 | not significant |
| 2938 | WU_APOPTOSIS_BY_CDKN1A_NOT_VIA_TP53                                    | -1.12 | 0.45 | 0 | 0 | 0 | not significant |
| 2939 | GO_CDP_CHOLINE_PATHWAY                                                 | -1.12 | 0.44 | 0 | 0 | 0 | not significant |
| 2940 | GO_GAS_HOMEOSTASIS                                                     | -1.12 | 0.44 | 0 | 0 | 0 | not significant |
| 2941 | GO_REGULATION_OF_HISTONE_H3_K36_METHYLATION                            | -1.12 | 0.44 | 0 | 0 | 0 | not significant |
| 2942 | REACTOME_OAS_ANTIVIRAL_RESPONSE                                        | -1.12 | 0.44 | 0 | 0 | 0 | not significant |
| 2943 | GO_TETRAHYDROFOLATE_BIOSYNTHETIC_PROCESS                               | -1.12 | 0.43 | 0 | 0 | 0 | not significant |
| 2944 | REACTOME_RUNX3_REGULATES_P14_ARF                                       | -1.12 | 0.43 | 0 | 0 | 0 | not significant |
| 2945 | GO_POSITIVE_REGULATION_OF_MOLECULAR_FUNCTION                           | -1.11 | 4    | 0 | 0 | 0 | not significant |
| 2946 | NUYTEN_EZH2_TARGETS_DN                                                 | -1.11 | 1.73 | 0 | 0 | 0 | not significant |
| 2947 | GO_PEPTIDYL_AMINO_ACID_MODIFICATION                                    | -1.11 | 1.57 | 0 | 0 | 0 | not significant |
| 2948 | GO_ENVELOPE                                                            | -1.11 | 1.32 | 0 | 0 | 0 | not significant |
| 2949 | PJWANA_BRCA2_PCC_NETWORK                                               | -1.11 | 1.19 | 0 | 0 | 0 | not significant |
| 2950 | STARK_PREFRONTAL_CORTEX_22Q11_DELETION_DN                              | -1.11 | 1.01 | 0 | 0 | 0 | not significant |
| 2951 | GO_POSITIVE_REGULATION_OF_KINASE_ACTIVITY                              | -1.11 | 0.85 | 0 | 0 | 0 | not significant |
| 2952 | REACTOME_SIGNALING_BY_RECEPTOR_TYROSINE_KINASES                        | -1.11 | 0.84 | 0 | 0 | 0 | not significant |
| 2953 | KAAB_HEART_ATRIUM_VS_VENTRICLE_DN                                      | -1.11 | 0.82 | 0 | 0 | 0 | not significant |
| 2954 | GO_ENERGY_DERIVATION_BY_OXIDATION_OF_ORGANIC_COMPOUNDS                 | -1.11 | 0.79 | 0 | 0 | 0 | not significant |
| 2955 | GO_PROTEIN_POLYMERIZATION                                              | -1.11 | 0.79 | 0 | 0 | 0 | not significant |
| 2956 | LEI_MYB_TARGETS                                                        | -1.11 | 0.78 | 0 | 0 | 0 | not significant |
| 2957 | GO_PROTEIN_LOCALIZATION_TO_CELL_PERIPHERY                              | -1.11 | 0.76 | 0 | 0 | 0 | not significant |
| 2958 | GO_VIRAL_GENE_EXPRESSION                                               | -1.11 | 0.76 | 0 | 0 | 0 | not significant |
| 2959 | GO_RNA_POLYMERASE_II_TRANSCRIPTION_FACTOR_COMPLEX                      | -1.11 | 0.73 | 0 | 0 | 0 | not significant |
| 2960 | CYCLIN_D1_KE_V1_UP                                                     | -1.11 | 0.68 | 0 | 0 | 0 | not significant |
| 2961 | GO_VESICLE_TARGETING                                                   | -1.11 | 0.67 | 0 | 0 | 0 | not significant |
| 2962 | GO_UROGENITAL_SYSTEM_DEVELOPMENT                                       | -1.11 | 0.66 | 0 | 0 | 0 | not significant |
| 2963 | MCBRYAN_PUBERTAL_BREAST_4_5WK_DN                                       | -1.11 | 0.65 | 0 | 0 | 0 | not significant |
| 2964 | DARWICHE_PAPILLOMA_RISK_HIGH_UP                                        | -1.11 | 0.64 | 0 | 0 | 0 | not significant |
| 2965 | GO_VESICLE_BUDDING_FROM_MEMBRANE                                       | -1.11 | 0.63 | 0 | 0 | 0 | not significant |
| 2966 | GO_ENSHEATHMENT_OF_NEURONS                                             | -1.11 | 0.6  | 0 | 0 | 0 | not significant |
| 2967 | GO_HISTONE_METHYLTRANSFERASE_ACTIVITY                                  | -1.11 | 0.59 | 0 | 0 | 0 | not significant |
| 2968 | GO_PROTEIN_LOCALIZATION_TO_CYTOSKELETON                                | -1.11 | 0.59 | 0 | 0 | 0 | not significant |
| 2969 | REACTOME_TGF_BETA_RECEPTOR_SIGNALING_ACTIVATES_SMADS                   | -1.11 | 0.59 | 0 | 0 | 0 | not significant |
| 2970 | GO_GDP_BINDING                                                         | -1.11 | 0.57 | 0 | 0 | 0 | not significant |
| 2971 | GO_MICROTUBULE_POLYMERIZATION                                          | -1.11 | 0.57 | 0 | 0 | 0 | not significant |
| 2972 | GO_POSITIVE_REGULATION_OF_TRANSMEMBRANE_RECEPTOR_PROTEIN_SERINE        | -1.11 | 0.57 | 0 | 0 | 0 | not significant |
| 2973 | TCGA_GLIOMASTOMA_COPY_NUMBER_UP                                        | -1.11 | 0.57 | 0 | 0 | 0 | not significant |
| 2974 | LIAO_HAVE_SOX4_BINDING_SITES                                           | -1.11 | 0.56 | 0 | 0 | 0 | not significant |
| 2975 | PARK_HSC_AND_MULTIPOTENT_PROGENITORS                                   | -1.11 | 0.56 | 0 | 0 | 0 | not significant |
| 2976 | REACTOME_COPII_MEDIATED_VESICLE_TRANSPORT                              | -1.11 | 0.55 | 0 | 0 | 0 | not significant |
| 2977 | CHIARETTI_T_ALL_REFRACTORY_TO_THERAPY                                  | -1.11 | 0.54 | 0 | 0 | 0 | not significant |
| 2978 | GO_MYD88_DEPENDENT_TOLL_LIKE_RECEPTOR_SIGNALING_PATHWAY                | -1.11 | 0.53 | 0 | 0 | 0 | not significant |
| 2979 | GO_POSITIVE_REGULATION_OF_PROTEIN_IMPORT                               | -1.11 | 0.53 | 0 | 0 | 0 | not significant |
| 2980 | PID_ALPHA_SYNUCLEIN_PATHWAY                                            | -1.11 | 0.53 | 0 | 0 | 0 | not significant |
| 2981 | GO_CYSTEINE_TYPE_ENDOPEPTIDASE_INHIBITOR_ACTIVITY                      | -1.11 | 0.52 | 0 | 0 | 0 | not significant |
| 2982 | GO_NEGATIVE_REGULATION_OF_NOTCH_SIGNALING_PATHWAY                      | -1.11 | 0.52 | 0 | 0 | 0 | not significant |
| 2983 | GO_PEPTIDE_TRANSMEMBRANE_TRANSPORTER_ACTIVITY                          | -1.11 | 0.52 | 0 | 0 | 0 | not significant |
| 2984 | REACTOME_DOWNREGULATION_OF_TGF_BETA_RECEPTOR_SIGNALING                 | -1.11 | 0.52 | 0 | 0 | 0 | not significant |
| 2985 | BIOCARTA_VEGF_PATHWAY                                                  | -1.11 | 0.51 | 0 | 0 | 0 | not significant |
| 2986 | GO_POSITIVE_REGULATION_OF_INTERFERON_ALPHA_PRODUCTION                  | -1.11 | 0.51 | 0 | 0 | 0 | not significant |
| 2987 | GO_POSITIVE_REGULATION_OF_TISSUE_REMODELING                            | -1.11 | 0.51 | 0 | 0 | 0 | not significant |
| 2988 | PID_DELTA_NP63_PATHWAY                                                 | -1.11 | 0.51 | 0 | 0 | 0 | not significant |
| 2989 | GO_MRNA_METHYLATION                                                    | -1.11 | 0.5  | 0 | 0 | 0 | not significant |
| 2990 | GO_POSITIVE_REGULATION_OF_EPIDERMIS_DEVELOPMENT                        | -1.11 | 0.5  | 0 | 0 | 0 | not significant |
| 2991 | GO_OOCYTE_MATURATION                                                   | -1.11 | 0.49 | 0 | 0 | 0 | not significant |
| 2992 | GO_REGULATION_OF_INTRINSIC_APOPTOTIC_SIGNALING_PATHWAY_IN_RESPONSE     | -1.11 | 0.49 | 0 | 0 | 0 | not significant |
| 2993 | GO_ANTIBIOTIC_CATABOLIC_PROCESS                                        | -1.11 | 0.48 | 0 | 0 | 0 | not significant |
| 2994 | GO_NEGATIVE_REGULATION_OF_COAGULATION                                  | -1.11 | 0.48 | 0 | 0 | 0 | not significant |
| 2995 | GO_NEGATIVE_REGULATION_OF_PEPTIDYL_SERINE_PHOSPHORYLATION              | -1.11 | 0.48 | 0 | 0 | 0 | not significant |
| 2996 | GO_BRANCHING_INVOLVED_IN_MAMMARY_GLAND_DUCT_MORPHOGENESIS              | -1.11 | 0.47 | 0 | 0 | 0 | not significant |
| 2997 | GO_DNA_INTEGRATION                                                     | -1.11 | 0.47 | 0 | 0 | 0 | not significant |
| 2998 | GO_GLUCAN_CATABOLIC_PROCESS                                            | -1.11 | 0.47 | 0 | 0 | 0 | not significant |
| 2999 | GO_POSITIVE_REGULATION_OF_NUCLEOTIDE_BIOSYNTHETIC_PROCESS              | -1.11 | 0.47 | 0 | 0 | 0 | not significant |
| 3000 | REACTOME_CHREBP_ACTIVATES_METABOLIC_GENE_EXPRESSION                    | -1.11 | 0.46 | 0 | 0 | 0 | not significant |
| 3001 | GO_LONG_CHAIN_FATTY_ACID_COA_LIGASE_ACTIVITY                           | -1.11 | 0.45 | 0 | 0 | 0 | not significant |
| 3002 | IRITANI_MAD1_TARGETS_UP                                                | -1.11 | 0.45 | 0 | 0 | 0 | not significant |
| 3003 | REACTOME_WNT5A_DEPENDENT_INTERNALIZATION_OF_FZD2_FZD5_AND_ROR2         | -1.11 | 0.45 | 0 | 0 | 0 | not significant |
| 3004 | GO_MOTILE_CILIUM_ASSEMBLY                                              | -1.11 | 0.44 | 0 | 0 | 0 | not significant |
| 3005 | GO_POSITIVE_REGULATION_OF_TYPE_I_INTERFERON_MEDIATED_SIGNALING_PATHWAY | -1.11 | 0.44 | 0 | 0 | 0 | not significant |
| 3006 | GO_RESPONSE_TO_EPINEPHRINE                                             | -1.11 | 0.44 | 0 | 0 | 0 | not significant |
| 3007 | KEGG_CIRCADIAN_RHYTHM_MAMMAL                                           | -1.11 | 0.44 | 0 | 0 | 0 | not significant |
| 3008 | ZEILSTRA_CD44_TARGETS_DN                                               | -1.11 | 0.44 | 0 | 0 | 0 | not significant |
| 3009 | GO_NSL_COMPLEX                                                         | -1.11 | 0.43 | 0 | 0 | 0 | not significant |
| 3010 | GO_OXIDIZED_BASE_LESION_DNA_N_GLYCOSYLASE_ACTIVITY                     | -1.11 | 0.41 | 0 | 0 | 0 | not significant |
| 3011 | GO_CELLULAR_MACROMOLECULE_LOCALIZATION                                 | -1.10 | 4    | 0 | 0 | 0 | not significant |
| 3012 | GO_MICROTUBULE_ORGANIZING_CENTER                                       | -1.10 | 1.11 | 0 | 0 | 0 | not significant |
| 3013 | REACTOME_TRANSCRIPTIONAL_REGULATION_BY_TP53                            | -1.10 | 0.92 | 0 | 0 | 0 | not significant |
| 3014 | GO_PROTEIN_HETERODIMERIZATION_ACTIVITY                                 | -1.10 | 0.83 | 0 | 0 | 0 | not significant |
| 3015 | REACTOME_CHROMATIN_ORGANIZATION                                        | -1.10 | 0.75 | 0 | 0 | 0 | not significant |
| 3016 | GO_CENTRIOLE                                                           | -1.10 | 0.65 | 0 | 0 | 0 | not significant |
| 3017 | GO_NEGATIVE_REGULATION_OF_INTRINSIC_APOPTOTIC_SIGNALING_PATHWAY        | -1.10 | 0.64 | 0 | 0 | 0 | not significant |
| 3018 | GO_LARGE_RIBOSOMAL_SUBUNIT                                             | -1.10 | 0.62 | 0 | 0 | 0 | not significant |
| 3019 | GO_NEGATIVE_REGULATION_OF_PROTEIN_BINDING                              | -1.10 | 0.62 | 0 | 0 | 0 | not significant |
| 3020 | MCBRYAN_PUBERTAL_BREAST_5_6WK_DN                                       | -1.10 | 0.62 | 0 | 0 | 0 | not significant |
| 3021 | GO_CELLULAR_COMPONENT_ASSEMBLY_INVOLVED_IN_MORPHOGENESIS               | -1.10 | 0.61 | 0 | 0 | 0 | not significant |
| 3022 | GO_MUSCLE_CELL_DEVELOPMENT                                             | -1.10 | 0.61 | 0 | 0 | 0 | not significant |
| 3023 | GO_NEGATIVE_REGULATION_OF_MYELOID_CELL_DIFFERENTIATION                 | -1.10 | 0.59 | 0 | 0 | 0 | not significant |
| 3024 | BRUECKNER_TARGETS_OF_MIRLET7A3_DN                                      | -1.10 | 0.58 | 0 | 0 | 0 | not significant |
| 3025 | GO_REGULATION_OF_DNA_TEMPLATED_TRANSCRIPTION_ELONGATION                | -1.10 | 0.58 | 0 | 0 | 0 | not significant |
| 3026 | IVANOVA_HEMATOPOIESIS_INTERMEDIATE_PROGENITOR                          | -1.10 | 0.57 | 0 | 0 | 0 | not significant |
| 3027 | GO_NEPHRON_DEVELOPMENT                                                 | -1.10 | 0.56 | 0 | 0 | 0 | not significant |
| 3028 | MULLIGHAN_NPM1_MUTATED_SIGNATURE_2_DN                                  | -1.10 | 0.56 | 0 | 0 | 0 | not significant |
| 3029 | GO_MEIOSIS_I_CELL_CYCLE_PROCESS                                        | -1.10 | 0.53 | 0 | 0 | 0 | not significant |
| 3030 | GO_POSITIVE_REGULATION_OF_DNA_BIOSYNTHETIC_PROCESS                     | -1.10 | 0.53 | 0 | 0 | 0 | not significant |
| 3031 | GOTZMANN_EPITHELIAL_TO_MESENCHYMAL_TRANSITION_UP                       | -1.10 | 0.52 | 0 | 0 | 0 | not significant |
| 3032 | MARIADASON_REGULATED_BY_HISTONE_ACETYLATION_DN                         | -1.10 | 0.52 | 0 | 0 | 0 | not significant |
| 3033 | MILL_PSEUDOPODIA                                                       | -1.10 | 0.52 | 0 | 0 | 0 | not significant |
| 3034 | REACTOME_SIGNALING_BY_TYPE_1_INSULIN_LIKE_GROWTH_FACTOR_1_RECEPTOR     | -1.10 | 0.52 | 0 | 0 | 0 | not significant |
| 3035 | GUO_HEX_TARGETS_DN                                                     | -1.10 | 0.51 | 0 | 0 | 0 | not significant |
| 3036 | HOELZEL_NF1_TARGETS_UP                                                 | -1.10 | 0.51 | 0 | 0 | 0 | not significant |
| 3037 | SIMBLAN_UV_RESPONSE_IMMORTALIZED_DN                                    | -1.10 | 0.51 | 0 | 0 | 0 | not significant |
| 3038 | GO_INO80_TYPE_COMPLEX                                                  | -1.10 | 0.5  | 0 | 0 | 0 | not significant |
| 3039 | KEGG_MELANOMA                                                          | -1.10 | 0.5  | 0 | 0 | 0 | not significant |
| 3040 | REACTOME_CD28_DEPENDENT_P13K_AKT_SIGNALING                             | -1.10 | 0.5  | 0 | 0 | 0 | not significant |



|      |                                                                    |       |      |   |   |   |                 |
|------|--------------------------------------------------------------------|-------|------|---|---|---|-----------------|
| 3041 | AZARE_STAT3_TARGETS                                                | -1.10 | 0.48 | 0 | 0 | 0 | not significant |
| 3042 | GO_INOSITOL_PHOSPHATE_MEDIATED_SIGNALING                           | -1.10 | 0.48 | 0 | 0 | 0 | not significant |
| 3043 | YAMASHITA_LIVER_CANCER_STEM_CELL_UP                                | -1.10 | 0.48 | 0 | 0 | 0 | not significant |
| 3044 | GO_PHOSPHATIDYLINOSITOL_MONOPHOSPHATE_PHOSPHATASE_ACTIVITY         | -1.10 | 0.47 | 0 | 0 | 0 | not significant |
| 3045 | GO_POSITIVE_REGULATION_OF_MITOCHONDRIAL_TRANSLATION                | -1.10 | 0.47 | 0 | 0 | 0 | not significant |
| 3046 | PID_SMAD2_3PATHWAY                                                 | -1.10 | 0.47 | 0 | 0 | 0 | not significant |
| 3047 | REACTOME_DEPOLYMERISATION_OF_THE_NUCLEAR_LAMINA                    | -1.10 | 0.47 | 0 | 0 | 0 | not significant |
| 3048 | KORKOLA_YOLK_SAC_TUMOR_UP                                          | -1.10 | 0.46 | 0 | 0 | 0 | not significant |
| 3049 | GO_ACTIN_BINDING                                                   | -1.10 | 0.45 | 0 | 0 | 0 | not significant |
| 3050 | GO_CYTOSKELETAL_ANCHORING_AT_PLASMA_MEMBRANE                       | -1.10 | 0.45 | 0 | 0 | 0 | not significant |
| 3051 | GO_STARTLE_RESPONSE                                                | -1.10 | 0.44 | 0 | 0 | 0 | not significant |
| 3052 | PEPPER_CHRONIC_LYMPHOCYTIC_LEUKEMIA_DN                             | -1.10 | 0.44 | 0 | 0 | 0 | not significant |
| 3053 | REACTOME_PROTEIN_METHYLATION                                       | -1.10 | 0.44 | 0 | 0 | 0 | not significant |
| 3054 | GO_CELLULAR_HYPEROSMOTIC_RESPONSE                                  | -1.10 | 0.43 | 0 | 0 | 0 | not significant |
| 3055 | GO_INTERLEUKIN_5_PRODUCTION                                        | -1.10 | 0.43 | 0 | 0 | 0 | not significant |
| 3056 | GO_PHOSPHOSERINE_RESIDUE_BINDING                                   | -1.10 | 0.43 | 0 | 0 | 0 | not significant |
| 3057 | GO_SECRETORY_GRANULE_LOCALIZATION                                  | -1.10 | 0.43 | 0 | 0 | 0 | not significant |
| 3058 | GO_UMP_BIOSYNTHETIC_PROCESS                                        | -1.10 | 0.43 | 0 | 0 | 0 | not significant |
| 3059 | GO_XYLULOSE_5_PHOSPHATE_BIOSYNTHETIC_PROCESS                       | -1.10 | 0.43 | 0 | 0 | 0 | not significant |
| 3060 | GO_ACTIN_CROSSLINK_FORMATION                                       | -1.10 | 0.42 | 0 | 0 | 0 | not significant |
| 3061 | GO_POSITIVE_REGULATION_OF_PROTEIN_HOMODIMERIZATION_ACTIVITY        | -1.10 | 0.42 | 0 | 0 | 0 | not significant |
| 3062 | GO_RESPONSE_TO_STIMULUS_INVOLVED_IN_REGULATION_OF_MUSCLE_ADAPTAT   | -1.10 | 0.42 | 0 | 0 | 0 | not significant |
| 3063 | GO_SPERM_CHROMATIN_CONDENSATION                                    | -1.10 | 0.42 | 0 | 0 | 0 | not significant |
| 3064 | GO_TRANSCRIPTION_FACTOR_TFIH_CORE_COMPLEX                          | -1.10 | 0.42 | 0 | 0 | 0 | not significant |
| 3065 | GO_TRANSCRIPTIONAL_PREINITIATION_COMPLEX                           | -1.10 | 0.42 | 0 | 0 | 0 | not significant |
| 3066 | REACTOME_FORMATION_OF_XYLULOSE_5_PHOSPHATE                         | -1.10 | 0.42 | 0 | 0 | 0 | not significant |
| 3067 | THUM_MIR21_TARGETS_HEART_DISEASE_DN                                | -1.10 | 0.42 | 0 | 0 | 0 | not significant |
| 3068 | GO_REGULATION_OF_GLYCOGEN_CATABOLIC_PROCESS                        | -1.10 | 0.41 | 0 | 0 | 0 | not significant |
| 3069 | GO_REGULATION_OF_LIPOPROTEIN_PARTICLE_CLEARANCE                    | -1.10 | 0.41 | 0 | 0 | 0 | not significant |
| 3070 | GO_REGULATION_OF_MESODERM_DEVELOPMENT                              | -1.10 | 0.41 | 0 | 0 | 0 | not significant |
| 3071 | GO_UBIQUINONE_BINDING                                              | -1.10 | 0.41 | 0 | 0 | 0 | not significant |
| 3072 | PETRETTO_BLOOD_PRESSURE_UP                                         | -1.10 | 0.41 | 0 | 0 | 0 | not significant |
| 3073 | GO_REGULATION_OF_CARBOHYDRATE_METABOLIC_PROCESS_BY_REGULATION_I    | -1.10 | 0.4  | 0 | 0 | 0 | not significant |
| 3074 | TONKS_TARGETS_OF_RUNK1_RUNK1T1_FUSION_SUSTAINED_IN_MONOCYTE_DN     | -1.10 | 0.4  | 0 | 0 | 0 | not significant |
| 3075 | GO_CERAMIDE_1_PHOSPHATE_BINDING                                    | -1.10 | 0.39 | 0 | 0 | 0 | not significant |
| 3076 | GO_COVALENT_CHROMATIN_MODIFICATION                                 | -1.09 | 1.01 | 0 | 0 | 0 | not significant |
| 3077 | OSMAN_BLADDER_CANCER_UP                                            | -1.09 | 0.89 | 0 | 0 | 0 | not significant |
| 3078 | ZWANG_CLASS_1_TRANSIENTLY_INDUCED_BY_EGF                           | -1.09 | 0.79 | 0 | 0 | 0 | not significant |
| 3079 | GO_UBIQUITIN_LIGASE_COMPLEX                                        | -1.09 | 0.75 | 0 | 0 | 0 | not significant |
| 3080 | RAY_TUMORIGENESIS_BY_ERBB2_CDC25A_DN                               | -1.09 | 0.71 | 0 | 0 | 0 | not significant |
| 3081 | REACTOME_NEURONAL_SYSTEM                                           | -1.09 | 0.69 | 0 | 0 | 0 | not significant |
| 3082 | GO_REGULATION_OF_PROTEIN_BINDING                                   | -1.09 | 0.66 | 0 | 0 | 0 | not significant |
| 3083 | GO_RIBONUCLEOPROTEIN_GRANULE                                       | -1.09 | 0.66 | 0 | 0 | 0 | not significant |
| 3084 | GO_CHROMATIN_ASSEMBLY                                              | -1.09 | 0.63 | 0 | 0 | 0 | not significant |
| 3085 | GO_PROTEIN_C_TERMINUS_BINDING                                      | -1.09 | 0.63 | 0 | 0 | 0 | not significant |
| 3086 | GO_STRIATED_MUSCLE_CELL_DIFFERENTIATION                            | -1.09 | 0.63 | 0 | 0 | 0 | not significant |
| 3087 | CHR11P15                                                           | -1.09 | 0.62 | 0 | 0 | 0 | not significant |
| 3088 | GO_PEPTIDE_BINDING                                                 | -1.09 | 0.59 | 0 | 0 | 0 | not significant |
| 3089 | HALLMARK_PROTEIN_SECRETION                                         | -1.09 | 0.59 | 0 | 0 | 0 | not significant |
| 3090 | REACTOME_RECRUITMENT_OF_NUMA_TO_MITOTIC_CENTROSOMES                | -1.09 | 0.59 | 0 | 0 | 0 | not significant |
| 3091 | GO_RIBOSE_PHOSPHATE_BIOSYNTHETIC_PROCESS                           | -1.09 | 0.58 | 0 | 0 | 0 | not significant |
| 3092 | GO_CHANNEL_REGULATOR_ACTIVITY                                      | -1.09 | 0.56 | 0 | 0 | 0 | not significant |
| 3093 | GO_CHROMATIN_REMODELING_AT_CENTROMERE                              | -1.09 | 0.55 | 0 | 0 | 0 | not significant |
| 3094 | GO_FIBROBLAST_GROWTH_FACTOR_RECEPTOR_SIGNALING_PATHWAY             | -1.09 | 0.55 | 0 | 0 | 0 | not significant |
| 3095 | HALLMARK_REACTIVE_OXYGEN_SPECIES_PATHWAY                           | -1.09 | 0.55 | 0 | 0 | 0 | not significant |
| 3096 | REACTOME_SIGNALING_BY_TGF_BETA_FAMILY_MEMBERS                      | -1.09 | 0.55 | 0 | 0 | 0 | not significant |
| 3097 | GO_CYCLIN_DEPENDENT_PROTEIN_KINASE_HOLOENZYME_COMPLEX              | -1.09 | 0.53 | 0 | 0 | 0 | not significant |
| 3098 | YAGI_AML_WITH_T_9_11_TRANSLOCATION                                 | -1.09 | 0.53 | 0 | 0 | 0 | not significant |
| 3099 | GO_STEM_CELL_PROLIFERATION                                         | -1.09 | 0.52 | 0 | 0 | 0 | not significant |
| 3100 | GO_TISSUE_REGENERATION                                             | -1.09 | 0.52 | 0 | 0 | 0 | not significant |
| 3101 | GO_TIGHT_JUNCTION_ORGANIZATION                                     | -1.09 | 0.51 | 0 | 0 | 0 | not significant |
| 3102 | NADLER_HYPERGLYCEMIA_AT_OBESITY                                    | -1.09 | 0.51 | 0 | 0 | 0 | not significant |
| 3103 | PID_RET_PATHWAY                                                    | -1.09 | 0.51 | 0 | 0 | 0 | not significant |
| 3104 | GO_POSITIVE_REGULATION_OF_CYCLIN_DEPENDENT_PROTEIN_KINASE_ACTIVITY | -1.09 | 0.5  | 0 | 0 | 0 | not significant |
| 3105 | GO_REGULATION_OF_GASTRULATION                                      | -1.09 | 0.5  | 0 | 0 | 0 | not significant |
| 3106 | GO_REGULATION_OF_TRANSCRIPTION_ELONGATION_FROM_RNA_POLYMERASE_II   | -1.09 | 0.5  | 0 | 0 | 0 | not significant |
| 3107 | GO_NEUROBLAST_PROLIFERATION                                        | -1.09 | 0.49 | 0 | 0 | 0 | not significant |
| 3108 | HALMOS_CEBPA_TARGETS_DN                                            | -1.09 | 0.49 | 0 | 0 | 0 | not significant |
| 3109 | SIG_REGULATION_OF_THE_ACTIN_CYTOSKELETON_BY_RHO_GTPASES            | -1.09 | 0.49 | 0 | 0 | 0 | not significant |
| 3110 | KIM_TIAL1_TARGETS                                                  | -1.09 | 0.48 | 0 | 0 | 0 | not significant |
| 3111 | GARGALOVIC_RESPONSE_TO_OXIDIZED_PHOSPHOLIPIDS_YELLOW_DN            | -1.09 | 0.47 | 0 | 0 | 0 | not significant |
| 3112 | KEGG_DRUG_METABOLISM_OTHER_ENZYMES                                 | -1.09 | 0.47 | 0 | 0 | 0 | not significant |
| 3113 | BIOCARTA_CK1_PATHWAY                                               | -1.09 | 0.46 | 0 | 0 | 0 | not significant |
| 3114 | BIOCARTA_PITX2_PATHWAY                                             | -1.09 | 0.46 | 0 | 0 | 0 | not significant |
| 3115 | CHR12P12                                                           | -1.09 | 0.46 | 0 | 0 | 0 | not significant |
| 3116 | GO_CELLULAR_RESPONSE_TO_VITAMIN_D                                  | -1.09 | 0.46 | 0 | 0 | 0 | not significant |
| 3117 | GO_NEGATIVE_REGULATION_OF_VIRAL_TRANSCRIPTION                      | -1.09 | 0.46 | 0 | 0 | 0 | not significant |
| 3118 | GO_REGULATION_OF_MITOTIC_SPINDLE_ASSEMBLY                          | -1.09 | 0.46 | 0 | 0 | 0 | not significant |
| 3119 | GO_TRANSLATION_REPRESSOR_ACTIVITY_MRNA_REGULATORY_ELEMENT_BINDIN   | -1.09 | 0.46 | 0 | 0 | 0 | not significant |
| 3120 | LIU_BREAST_CANCER                                                  | -1.09 | 0.46 | 0 | 0 | 0 | not significant |
| 3121 | REACTOME_BIOTIN_TRANSPORT_AND_METABOLISM                           | -1.09 | 0.45 | 0 | 0 | 0 | not significant |
| 3122 | GO_METANEPHRIC_MESENCHYME_DEVELOPMENT                              | -1.09 | 0.44 | 0 | 0 | 0 | not significant |
| 3123 | REACTOME_SYNTHESIS_OF_PE                                           | -1.09 | 0.44 | 0 | 0 | 0 | not significant |
| 3124 | GO_DECIDUALIZATION                                                 | -1.09 | 0.43 | 0 | 0 | 0 | not significant |
| 3125 | GO_MESENCHYMAL_TO_EPITHELIAL_TRANSITION                            | -1.09 | 0.43 | 0 | 0 | 0 | not significant |
| 3126 | GO_POSITIVE_REGULATION_OF_G_PROTEIN_COUPLED_RECEPTOR_SIGNALING_P/  | -1.09 | 0.43 | 0 | 0 | 0 | not significant |
| 3127 | GO_POSITIVE_REGULATION_OF_INTERLEUKIN_5_PRODUCTION                 | -1.09 | 0.43 | 0 | 0 | 0 | not significant |
| 3128 | REACTOME_PKA_MEDIATED_PHOSPHORYLATION_OF_CREB                      | -1.09 | 0.43 | 0 | 0 | 0 | not significant |
| 3129 | GO_WIDE_PORE_CHANNEL_ACTIVITY                                      | -1.09 | 0.42 | 0 | 0 | 0 | not significant |
| 3130 | REACTOME_RUNK3_REGULATES_WNT_SIGNALING                             | -1.09 | 0.42 | 0 | 0 | 0 | not significant |
| 3131 | BIOCARTA_TERC_PATHWAY                                              | -1.09 | 0.41 | 0 | 0 | 0 | not significant |
| 3132 | KRISHNAN_FURIN_TARGETS_DN                                          | -1.09 | 0.41 | 0 | 0 | 0 | not significant |
| 3133 | RAFFEL_VEGFA_TARGETS_UP                                            | -1.09 | 0.41 | 0 | 0 | 0 | not significant |
| 3134 | GO_METANEPHRIC_RENAL_VESICLE_MORPHOGENESIS                         | -1.09 | 0.4  | 0 | 0 | 0 | not significant |
| 3135 | GO_NEURON_FATE_SPECIFICATION                                       | -1.09 | 0.4  | 0 | 0 | 0 | not significant |
| 3136 | GO_PARENTAL_BEHAVIOR                                               | -1.09 | 0.4  | 0 | 0 | 0 | not significant |
| 3137 | MUNSHI_MULTIPLE_MYELOMA_DN                                         | -1.09 | 0.4  | 0 | 0 | 0 | not significant |
| 3138 | GO_CARDIOBLAST_DIFFERENTIATION                                     | -1.09 | 0.37 | 0 | 0 | 0 | not significant |
| 3139 | GO_PROTEOLYSIS                                                     | -1.08 | 1.23 | 0 | 0 | 0 | not significant |
| 3140 | GEORGES_TARGETS_OF_MIR192_AND_MIR215                               | -1.08 | 1    | 0 | 0 | 0 | not significant |
| 3141 | GO_REGULATION_OF_PROTEIN_MODIFICATION_PROCESS                      | -1.08 | 0.92 | 0 | 0 | 0 | not significant |
| 3142 | GO_ANATOMICAL_STRUCTURE_HOMEOSTASIS                                | -1.08 | 0.74 | 0 | 0 | 0 | not significant |
| 3143 | GO_POSITIVE_REGULATION_OF_ORGANELLE_ORGANIZATION                   | -1.08 | 0.74 | 0 | 0 | 0 | not significant |
| 3144 | GO_CELL_CELL_SIGNALING_BY_WNT                                      | -1.08 | 0.73 | 0 | 0 | 0 | not significant |
| 3145 | GO_POSITIVE_REGULATION_OF_CELL_DEVELOPMENT                         | -1.08 | 0.73 | 0 | 0 | 0 | not significant |
| 3146 | GO_REGULATION_OF_INNATE_IMMUNE_RESPONSE                            | -1.08 | 0.7  | 0 | 0 | 0 | not significant |
| 3147 | REACTOME_CILIUM_ASSEMBLY                                           | -1.08 | 0.63 | 0 | 0 | 0 | not significant |
| 3148 | CHIANG_LIVER_CANCER_SUBCLASS_UNANNOTATED_DN                        | -1.08 | 0.6  | 0 | 0 | 0 | not significant |
| 3149 | REACTOME_RESPIRATORY_ELECTRON_TRANSPORT                            | -1.08 | 0.59 | 0 | 0 | 0 | not significant |

|      |                                                                    |       |      |   |   |   |                 |
|------|--------------------------------------------------------------------|-------|------|---|---|---|-----------------|
| 3150 | GO_PROTEIN_ACETYLTRANSFERASE_COMPLEX                               | -1.08 | 0.58 | 0 | 0 | 0 | not significant |
| 3151 | WAMUNYOKOLI_OVARIAN_CANCER_LMP_DN                                  | -1.08 | 0.58 | 0 | 0 | 0 | not significant |
| 3152 | REACTOME_DNA_REPLICATION                                           | -1.08 | 0.55 | 0 | 0 | 0 | not significant |
| 3153 | REACTOME_SIGNALING_BY_ERBB2                                        | -1.08 | 0.55 | 0 | 0 | 0 | not significant |
| 3154 | LIU_NASOPHARYNGEAL_CARCCINOMA                                      | -1.08 | 0.53 | 0 | 0 | 0 | not significant |
| 3155 | MOOHA_VOXPPOS                                                      | -1.08 | 0.53 | 0 | 0 | 0 | not significant |
| 3156 | RB_P107_DN1_DN                                                     | -1.08 | 0.53 | 0 | 0 | 0 | not significant |
| 3157 | GO_POSITIVE_REGULATION_OF_CARDIAC_MUSCLE_TISSUE_DEVELOPMENT        | -1.08 | 0.52 | 0 | 0 | 0 | not significant |
| 3158 | GENTILE_RESPONSE_CLUSTER_D3                                        | -1.08 | 0.51 | 0 | 0 | 0 | not significant |
| 3159 | GO_NEURON_MIGRATION                                                | -1.08 | 0.51 | 0 | 0 | 0 | not significant |
| 3160 | GO_REGULATION_OF_NEUROLOGICAL_SYSTEM_PROCESS                       | -1.08 | 0.51 | 0 | 0 | 0 | not significant |
| 3161 | GO_SIGNAL_TRANSDUCTION_IN_ABSENCE_OF_LIGAND                        | -1.08 | 0.51 | 0 | 0 | 0 | not significant |
| 3162 | REACTOME_NUCLEOSOME_ASSEMBLY                                       | -1.08 | 0.51 | 0 | 0 | 0 | not significant |
| 3163 | CHR2Q14                                                            | -1.08 | 0.5  | 0 | 0 | 0 | not significant |
| 3164 | CHR8P21                                                            | -1.08 | 0.5  | 0 | 0 | 0 | not significant |
| 3165 | GO_9PLUS2_MOTILE_CILIUM                                            | -1.08 | 0.5  | 0 | 0 | 0 | not significant |
| 3166 | GO_BLASTOCYST_DEVELOPMENT                                          | -1.08 | 0.5  | 0 | 0 | 0 | not significant |
| 3167 | GO_POSITIVE_REGULATION_OF_CATION_CHANNEL_ACTIVITY                  | -1.08 | 0.5  | 0 | 0 | 0 | not significant |
| 3168 | GO_PROTEIN_K63_LINKED_UBIQUITINATION                               | -1.08 | 0.5  | 0 | 0 | 0 | not significant |
| 3169 | GO_UBIQUITIN_LIKE_PROTEIN_BINDING                                  | -1.08 | 0.5  | 0 | 0 | 0 | not significant |
| 3170 | GO_ENDOPLASMIC_RETICULUM_ORGANIZATION                              | -1.08 | 0.49 | 0 | 0 | 0 | not significant |
| 3171 | GO_STRUCTURAL_CONSTITUENT_OF_CYTOSKELETON                          | -1.08 | 0.49 | 0 | 0 | 0 | not significant |
| 3172 | TANAKA_METHYLATED_IN_ESOPHAGEAL_CARCCINOMA                         | -1.08 | 0.49 | 0 | 0 | 0 | not significant |
| 3173 | GO_MAIN_AXON                                                       | -1.08 | 0.48 | 0 | 0 | 0 | not significant |
| 3174 | GO_NEGATIVE_REGULATION_OF_PROTEASOMAL_UBIQUITIN_DEPENDENT_PROTEIN  | -1.08 | 0.48 | 0 | 0 | 0 | not significant |
| 3175 | GO_REGULATION_OF_MICROTUBULE_POLYMERIZATION                        | -1.08 | 0.48 | 0 | 0 | 0 | not significant |
| 3176 | MARTIN_INTERACT_WITH_HDAC                                          | -1.08 | 0.47 | 0 | 0 | 0 | not significant |
| 3177 | REACTOME_CARGO_CONCENTRATION_IN_THE_ER                             | -1.08 | 0.47 | 0 | 0 | 0 | not significant |
| 3178 | GO_LUNG_MORPHOGENESIS                                              | -1.08 | 0.46 | 0 | 0 | 0 | not significant |
| 3179 | TURASHVILI_BREAST_LOBULAR_CARCCINOMA_VS_DUCTAL_NORMAL_DN           | -1.08 | 0.46 | 0 | 0 | 0 | not significant |
| 3180 | GO_CUL4_RING_E3_UBIQUITIN_LIGASE_COMPLEX                           | -1.08 | 0.45 | 0 | 0 | 0 | not significant |
| 3181 | GO_GLANDULAR_EPITHELIAL_CELL_DEVELOPMENT                           | -1.08 | 0.45 | 0 | 0 | 0 | not significant |
| 3182 | GO_SYNAPTONEMAL_STRUCTURE                                          | -1.08 | 0.45 | 0 | 0 | 0 | not significant |
| 3183 | KEGG_STARCH_AND_SUCROSE_METABOLISM                                 | -1.08 | 0.45 | 0 | 0 | 0 | not significant |
| 3184 | GO_DOPAMINE_RECEPTOR_BINDING                                       | -1.08 | 0.44 | 0 | 0 | 0 | not significant |
| 3185 | GO_NEGATIVE_REGULATION_OF_MEIOTIC_CELL_CYCLE                       | -1.08 | 0.44 | 0 | 0 | 0 | not significant |
| 3186 | GO_PHYSIOLOGICAL_CARDIAC_MUSCLE_HYPERTROPHY                        | -1.08 | 0.44 | 0 | 0 | 0 | not significant |
| 3187 | GO_POLYOL_CATABOLIC_PROCESS                                        | -1.08 | 0.44 | 0 | 0 | 0 | not significant |
| 3188 | REACTOME_GLYCOGEN_SYNTHESIS                                        | -1.08 | 0.44 | 0 | 0 | 0 | not significant |
| 3189 | BIOCARTA_EIF4_PATHWAY                                              | -1.08 | 0.43 | 0 | 0 | 0 | not significant |
| 3190 | GO_POSITIVE_REGULATION_OF_MACROPHAGE_DIFFERENTIATION               | -1.08 | 0.43 | 0 | 0 | 0 | not significant |
| 3191 | REACTOME_REDUCTION_OF_CYTOSOLIC_CAPPLUSPLUS_LEVELS                 | -1.08 | 0.43 | 0 | 0 | 0 | not significant |
| 3192 | REACTOME_RRNA_PROCESSING_IN_THE_MITOCHONDRION                      | -1.08 | 0.43 | 0 | 0 | 0 | not significant |
| 3193 | GO_ESTABLISHMENT_OF_EPITHELIAL_CELL_APICAL_BASAL_POLARITY          | -1.08 | 0.42 | 0 | 0 | 0 | not significant |
| 3194 | GO_POSITIVE_REGULATION_OF_HISTONE_H4_ACETYLATION                   | -1.08 | 0.42 | 0 | 0 | 0 | not significant |
| 3195 | GO_CERAMIDE_1_PHOSPHATE_TRANSPORT                                  | -1.08 | 0.41 | 0 | 0 | 0 | not significant |
| 3196 | GO_EARLY_ENDOSOME_TO_GOLGI_TRANSPORT                               | -1.08 | 0.41 | 0 | 0 | 0 | not significant |
| 3197 | GO_ENDOTHELIAL_CELL_ACTIVATION                                     | -1.08 | 0.41 | 0 | 0 | 0 | not significant |
| 3198 | GO_MYOBLAST_PROLIFERATION                                          | -1.08 | 0.41 | 0 | 0 | 0 | not significant |
| 3199 | GO_PHOSPHATIDYLETHANOLAMINE_BIOSYNTHETIC_PROCESS                   | -1.08 | 0.41 | 0 | 0 | 0 | not significant |
| 3200 | GO_PRESYNAPTIC_CYTOSOL                                             | -1.08 | 0.41 | 0 | 0 | 0 | not significant |
| 3201 | GO_REGULATION_OF_TRANSLATIONAL_INITIATION_BY_EIF2_ALPHA_PHOSPHORYL | -1.08 | 0.41 | 0 | 0 | 0 | not significant |
| 3202 | REACTOME_GAP_JUNCTION_DEGRADATION                                  | -1.08 | 0.41 | 0 | 0 | 0 | not significant |
| 3203 | GO_REGULATION_OF_PROTEIN_LOCALIZATION_TO_NUCLEOLUS                 | -1.08 | 0.4  | 0 | 0 | 0 | not significant |
| 3204 | GO_RESPONSE_TO_SODIUM_ARSENITE                                     | -1.08 | 0.4  | 0 | 0 | 0 | not significant |
| 3205 | GO_RIBOSOME_DISASSEMBLY                                            | -1.08 | 0.4  | 0 | 0 | 0 | not significant |
| 3206 | GO_ANDROGEN_BIOSYNTHETIC_PROCESS                                   | -1.08 | 0.39 | 0 | 0 | 0 | not significant |
| 3207 | GO_PURINE_NUCLEOTIDE_SALVAGE                                       | -1.08 | 0.39 | 0 | 0 | 0 | not significant |
| 3208 | GO_REGULATION_OF_SKELETAL_MUSCLE_CONTRACTION                       | -1.08 | 0.39 | 0 | 0 | 0 | not significant |
| 3209 | REACTOME_SYNTHESIS_OF_WYBUTOSINE_AT_G37_OF_TRNA_PHE                | -1.08 | 0.39 | 0 | 0 | 0 | not significant |
| 3210 | GO_REGULATION_OF_RECEPTOR_CATABOLIC_PROCESS                        | -1.08 | 0.38 | 0 | 0 | 0 | not significant |
| 3211 | GO_NEGATIVE_REGULATION_OF_MEMBRANE_PERMEABILITY                    | -1.08 | 0.37 | 0 | 0 | 0 | not significant |
| 3212 | GO_PRESYNAPTIC_ENDOCYTTIC_ZONE                                     | -1.08 | 0.35 | 0 | 0 | 0 | not significant |
| 3213 | GO_EMBRYO_DEVELOPMENT                                              | -1.07 | 0.96 | 0 | 0 | 0 | not significant |
| 3214 | GO_SIGNAL_TRANSDUCTION_BY_PROTEIN_PHOSPHORYLATION                  | -1.07 | 0.8  | 0 | 0 | 0 | not significant |
| 3215 | GO_REGULATION_OF_CELLULAR_PROTEIN_LOCALIZATION                     | -1.07 | 0.77 | 0 | 0 | 0 | not significant |
| 3216 | GO_NEGATIVE_REGULATION_OF_PHOSPHORUS_METABOLIC_PROCESS             | -1.07 | 0.74 | 0 | 0 | 0 | not significant |
| 3217 | GO_POSITIVE_REGULATION_OF_CELLULAR_PROTEIN_LOCALIZATION            | -1.07 | 0.66 | 0 | 0 | 0 | not significant |
| 3218 | GO_NUCLEIC_ACID_PHOSPHODIESTER_BOND_HYDROLYSIS                     | -1.07 | 0.62 | 0 | 0 | 0 | not significant |
| 3219 | GO_AXON_PART                                                       | -1.07 | 0.6  | 0 | 0 | 0 | not significant |
| 3220 | GO_NEGATIVE_REGULATION_OF_CELL_DEVELOPMENT                         | -1.07 | 0.6  | 0 | 0 | 0 | not significant |
| 3221 | GO_CELLULAR_PROCESS_INVOLVED_IN_REPRODUCTION_IN_MULTICELLULAR_ORG  | -1.07 | 0.59 | 0 | 0 | 0 | not significant |
| 3222 | GO_REGULATION_OF_TRANSMEMBRANE_RECEPTOR_PROTEIN_SERINE_THREONIN    | -1.07 | 0.56 | 0 | 0 | 0 | not significant |
| 3223 | GO_MITOCHONDRIAL_MEMBRANE_ORGANIZATION                             | -1.07 | 0.55 | 0 | 0 | 0 | not significant |
| 3224 | KAYO_AGING_MUSCLE_UP                                               | -1.07 | 0.54 | 0 | 0 | 0 | not significant |
| 3225 | MASSARWEH_TAMOXIFEN_RESISTANCE_DN                                  | -1.07 | 0.54 | 0 | 0 | 0 | not significant |
| 3226 | GO_CONTRACTILE_FIBER                                               | -1.07 | 0.53 | 0 | 0 | 0 | not significant |
| 3227 | GO_EPIDERMAL_CELL_DIFFERENTIATION                                  | -1.07 | 0.53 | 0 | 0 | 0 | not significant |
| 3228 | GO_SMOOTH_MUSCLE_CELL_PROLIFERATION                                | -1.07 | 0.53 | 0 | 0 | 0 | not significant |
| 3229 | GO_PRODUCTION_OF_SMALL_RNA_INVOLVED_IN_GENE_SILENCING_BY_RNA       | -1.07 | 0.52 | 0 | 0 | 0 | not significant |
| 3230 | GO_PROTEIN_SERINE_THREONINE_PHOSPHATASE_ACTIVITY                   | -1.07 | 0.52 | 0 | 0 | 0 | not significant |
| 3231 | GO_SYNAPSE_ASSEMBLY                                                | -1.07 | 0.52 | 0 | 0 | 0 | not significant |
| 3232 | GO_REGULATION_OF_REACTIVE_OXYGEN_SPECIES_METABOLIC_PROCESS         | -1.07 | 0.51 | 0 | 0 | 0 | not significant |
| 3233 | FIGUEROA_AML_METHYLATION_CLUSTER_6_UP                              | -1.07 | 0.5  | 0 | 0 | 0 | not significant |
| 3234 | GO_TYROSINE_PHOSPHORYLATION_OF_STAT_PROTEIN                        | -1.07 | 0.5  | 0 | 0 | 0 | not significant |
| 3235 | ESC_J1_UP_LATE.V1_UP                                               | -1.07 | 0.49 | 0 | 0 | 0 | not significant |
| 3236 | GO_MAP_KINASE_KINASE_ACTIVITY                                      | -1.07 | 0.49 | 0 | 0 | 0 | not significant |
| 3237 | BONCI_TARGETS_OF_MIR15A_AND_MIR16_1                                | -1.07 | 0.48 | 0 | 0 | 0 | not significant |
| 3238 | GO_HORMONE_BINDING                                                 | -1.07 | 0.48 | 0 | 0 | 0 | not significant |
| 3239 | GO_REGULATION_OF_PHOSPHOLIPID_METABOLIC_PROCESS                    | -1.07 | 0.46 | 0 | 0 | 0 | not significant |
| 3240 | HONMA_DOCETAXEL_RESISTANCE                                         | -1.07 | 0.46 | 0 | 0 | 0 | not significant |
| 3241 | REACTOME_CD28_CO_STIMULATION                                       | -1.07 | 0.46 | 0 | 0 | 0 | not significant |
| 3242 | GO_KINETOCHORE_ORGANIZATION                                        | -1.07 | 0.45 | 0 | 0 | 0 | not significant |
| 3243 | REACTOME_SIGNAL_AMPLIFICATION                                      | -1.07 | 0.45 | 0 | 0 | 0 | not significant |
| 3244 | TIMOFEEVA_GROWTH_STRESS_VIA_STAT1_DN                               | -1.07 | 0.45 | 0 | 0 | 0 | not significant |
| 3245 | GO_POLY_A_BINDING                                                  | -1.07 | 0.44 | 0 | 0 | 0 | not significant |
| 3246 | GO_RESPONSE_TO_PLATELET_DERIVED_GROWTH_FACTOR                      | -1.07 | 0.44 | 0 | 0 | 0 | not significant |
| 3247 | ALONSO_METASTASIS_EMT_UP                                           | -1.07 | 0.43 | 0 | 0 | 0 | not significant |
| 3248 | BIOCARTA_NO1_PATHWAY                                               | -1.07 | 0.43 | 0 | 0 | 0 | not significant |
| 3249 | GO_MRNA_CLEAVAGE_INVOLVED_IN_MRNA_PROCESSING                       | -1.07 | 0.43 | 0 | 0 | 0 | not significant |
| 3250 | GO_SKELETAL_MUSCLE_CONTRACTION                                     | -1.07 | 0.43 | 0 | 0 | 0 | not significant |
| 3251 | GO_MUSCLE_CELL_CELLULAR_HOMEOSTASIS                                | -1.07 | 0.42 | 0 | 0 | 0 | not significant |
| 3252 | GO_POST_MRNA_RELEASE_SPLICEOSOMAL_COMPLEX                          | -1.07 | 0.42 | 0 | 0 | 0 | not significant |
| 3253 | REACTOME_TGF_BETA_RECEPTOR_SIGNALING_IN_EMT_EPITHELIAL_TO_MESENCH  | -1.07 | 0.42 | 0 | 0 | 0 | not significant |
| 3254 | GO_COSTAMERE                                                       | -1.07 | 0.41 | 0 | 0 | 0 | not significant |
| 3255 | GO_NEGATIVE_REGULATION_OF_CELL_SIZE                                | -1.07 | 0.41 | 0 | 0 | 0 | not significant |
| 3256 | GO_NEGATIVE_REGULATION_OF_VIRAL_RELEASE_FROM_HOST_CELL             | -1.07 | 0.41 | 0 | 0 | 0 | not significant |
| 3257 | MOOHA_GLUCCONEOGENESIS                                             | -1.07 | 0.41 | 0 | 0 | 0 | not significant |
| 3258 | REACTOME_ACTIVATION_OF_SMO                                         | -1.07 | 0.41 | 0 | 0 | 0 | not significant |

|      |                                                                    |       |      |   |   |   |                 |
|------|--------------------------------------------------------------------|-------|------|---|---|---|-----------------|
| 3259 | BIOCARTA_BARR_MAPK_PATHWAY                                         | -1.07 | 0.4  | 0 | 0 | 0 | not significant |
| 3260 | GO_CHOLESTEROL_CATABOLIC_PROCESS                                   | -1.07 | 0.4  | 0 | 0 | 0 | not significant |
| 3261 | GO_DEOXYRIBOSE_PHOSPHATE_CATABOLIC_PROCESS                         | -1.07 | 0.4  | 0 | 0 | 0 | not significant |
| 3262 | GO_EUKARYOTIC_48S_PREINITIATION_COMPLEX                            | -1.07 | 0.4  | 0 | 0 | 0 | not significant |
| 3263 | GO_GTP_BIOSYNTHETIC_PROCESS                                        | -1.07 | 0.4  | 0 | 0 | 0 | not significant |
| 3264 | GO_NEGATIVE_REGULATION_OF_TRANSCRIPTION_FROM_RNA_POLYMERASE_II_PF  | -1.07 | 0.4  | 0 | 0 | 0 | not significant |
| 3265 | GO_PROTEIN_HEXAMERIZATION                                          | -1.07 | 0.4  | 0 | 0 | 0 | not significant |
| 3266 | HINATA_NFKB_TARGETS_KERATINOCYTE_DN                                | -1.07 | 0.4  | 0 | 0 | 0 | not significant |
| 3267 | GO_INTRINSIC_COMPONENT_OF_EXTERNAL_SIDE_OF_PLASMA_MEMBRANE         | -1.07 | 0.39 | 0 | 0 | 0 | not significant |
| 3268 | GO_POSITIVE_REGULATION_OF_SISTER_CHROMATID_COHESION                | -1.07 | 0.39 | 0 | 0 | 0 | not significant |
| 3269 | GO_REGULATION_OF_PROTEIN_HETERODIMERIZATION_ACTIVITY               | -1.07 | 0.39 | 0 | 0 | 0 | not significant |
| 3270 | GO_RENAL_VESICLE_DEVELOPMENT                                       | -1.07 | 0.39 | 0 | 0 | 0 | not significant |
| 3271 | GO_SEX_DETERMINATION                                               | -1.07 | 0.39 | 0 | 0 | 0 | not significant |
| 3272 | MATZUK_MATERNAL_EFFECT                                             | -1.07 | 0.39 | 0 | 0 | 0 | not significant |
| 3273 | VALK_AML_WITH_11Q23_REARRANGED                                     | -1.07 | 0.39 | 0 | 0 | 0 | not significant |
| 3274 | GO_OXALOACETATE_METABOLIC_PROCESS                                  | -1.07 | 0.38 | 0 | 0 | 0 | not significant |
| 3275 | GO_TRANSCRIPTION_FACTOR_TFIIC_COMPLEX                              | -1.07 | 0.38 | 0 | 0 | 0 | not significant |
| 3276 | GO_BONE TRABECULA MORPHOGENESIS                                    | -1.07 | 0.37 | 0 | 0 | 0 | not significant |
| 3277 | GO_COMMITMENT_COMPLEX                                              | -1.07 | 0.37 | 0 | 0 | 0 | not significant |
| 3278 | GO_MSL_COMPLEX                                                     | -1.07 | 0.37 | 0 | 0 | 0 | not significant |
| 3279 | GO_NEGATIVE_REGULATION_OF_PROTEIN_SUMOYLATION                      | -1.07 | 0.37 | 0 | 0 | 0 | not significant |
| 3280 | INAMURA_LUNG_CANCER_SCC_SUBTYPES_DN                                | -1.07 | 0.37 | 0 | 0 | 0 | not significant |
| 3281 | GO_REGULATION_OF_HYDROLASE_ACTIVITY                                | -1.06 | 0.99 | 0 | 0 | 0 | not significant |
| 3282 | GO_CELLULAR_AMIDE_METABOLIC_PROCESS                                | -1.06 | 0.9  | 0 | 0 | 0 | not significant |
| 3283 | GO_REGULATION_OF_INTRACELLULAR_TRANSPORT                           | -1.06 | 0.74 | 0 | 0 | 0 | not significant |
| 3284 | RHEIN_ALL_GLUCOCORTICOID_THERAPY_DN                                | -1.06 | 0.64 | 0 | 0 | 0 | not significant |
| 3285 | STEIN_ESRRA_TARGETS                                                | -1.06 | 0.64 | 0 | 0 | 0 | not significant |
| 3286 | GO_MACROMOLECULE METHYLATION                                       | -1.06 | 0.58 | 0 | 0 | 0 | not significant |
| 3287 | GO_ANTIGEN_RECEPTOR_MEDIATED_SIGNALING_PATHWAY                     | -1.06 | 0.55 | 0 | 0 | 0 | not significant |
| 3288 | GO_NEGATIVE_REGULATION_OF_RESPONSE_TO_DNA_DAMAGE_STIMULUS          | -1.06 | 0.55 | 0 | 0 | 0 | not significant |
| 3289 | GO_NUCLEOSIDE_PHOSPHATE_BIOSYNTHETIC_PROCESS                       | -1.06 | 0.55 | 0 | 0 | 0 | not significant |
| 3290 | AMIT_EGF_RESPONSE_480_HELA                                         | -1.06 | 0.54 | 0 | 0 | 0 | not significant |
| 3291 | E2F1_UP.V1_UP                                                      | -1.06 | 0.53 | 0 | 0 | 0 | not significant |
| 3292 | GO_PROTEIN_N_TERMINUS_BINDING                                      | -1.06 | 0.52 | 0 | 0 | 0 | not significant |
| 3293 | ZHONG_RESPONSE_TO_AZACITIDINE_AND_TSA_UP                           | -1.06 | 0.52 | 0 | 0 | 0 | not significant |
| 3294 | GO_ELECTRON_TRANSFER_ACTIVITY                                      | -1.06 | 0.51 | 0 | 0 | 0 | not significant |
| 3295 | GO_POSITIVE_REGULATION_OF_TRANSPORTER_ACTIVITY                     | -1.06 | 0.51 | 0 | 0 | 0 | not significant |
| 3296 | HAHTOLA_MYCOSIS_FUNGOIDES_CD4_DN                                   | -1.06 | 0.5  | 0 | 0 | 0 | not significant |
| 3297 | REACTOME_REGULATION_OF_LIPID_METABOLISM_BY_PEROXISOME_PROLIFERAT   | -1.06 | 0.5  | 0 | 0 | 0 | not significant |
| 3298 | E2F3_UP.V1_DN                                                      | -1.06 | 0.49 | 0 | 0 | 0 | not significant |
| 3299 | GO_PHOSPHATIDYLINOSITOL_METABOLIC_PROCESS                          | -1.06 | 0.49 | 0 | 0 | 0 | not significant |
| 3300 | CHR20Q11                                                           | -1.06 | 0.48 | 0 | 0 | 0 | not significant |
| 3301 | GO_MRNA_3_UTR_BINDING                                              | -1.06 | 0.47 | 0 | 0 | 0 | not significant |
| 3302 | GO_N_ACYLTRANSFERASE_ACTIVITY                                      | -1.06 | 0.47 | 0 | 0 | 0 | not significant |
| 3303 | GO_SCAFFOLD_PROTEIN_BINDING                                        | -1.06 | 0.47 | 0 | 0 | 0 | not significant |
| 3304 | GO_SOMITOGENESIS                                                   | -1.06 | 0.47 | 0 | 0 | 0 | not significant |
| 3305 | KEGG_PYRIMIDINE_METABOLISM                                         | -1.06 | 0.47 | 0 | 0 | 0 | not significant |
| 3306 | SCHAEFFER_PROSTATE_DEVELOPMENT_12HR_UP                             | -1.06 | 0.47 | 0 | 0 | 0 | not significant |
| 3307 | GO_EMBRYONIC_CRANIAL_SKELETON_MORPHOGENESIS                        | -1.06 | 0.46 | 0 | 0 | 0 | not significant |
| 3308 | JOHANSSON_GLIOMAGENESIS_BY_PDGF_UP                                 | -1.06 | 0.46 | 0 | 0 | 0 | not significant |
| 3309 | PRAMOONJAGO_SOX4_TARGETS_DN                                        | -1.06 | 0.46 | 0 | 0 | 0 | not significant |
| 3310 | REACTOME_METABOLISM_OF_NUCLEOTIDES                                 | -1.06 | 0.46 | 0 | 0 | 0 | not significant |
| 3311 | TURASHVILL_BREAST_LOBULAR_CARCINOMA_VS_DUCTAL_NORMAL_UP            | -1.06 | 0.46 | 0 | 0 | 0 | not significant |
| 3312 | TERAO_AOX4_TARGETS_HG_UP                                           | -1.06 | 0.45 | 0 | 0 | 0 | not significant |
| 3313 | GO_HISTONE_MRNA_METABOLIC_PROCESS                                  | -1.06 | 0.44 | 0 | 0 | 0 | not significant |
| 3314 | MCCLUNG_DELTA_FOSB_TARGETS_8WK                                     | -1.06 | 0.44 | 0 | 0 | 0 | not significant |
| 3315 | REACTOME_MAP2K_AND_MAPK_ACTIVATION                                 | -1.06 | 0.44 | 0 | 0 | 0 | not significant |
| 3316 | GO_MIRNA_METABOLIC_PROCESS                                         | -1.06 | 0.43 | 0 | 0 | 0 | not significant |
| 3317 | LL_CISPLATIN_RESISTANCE_UP                                         | -1.06 | 0.43 | 0 | 0 | 0 | not significant |
| 3318 | MIKKELSEN_ES_ICP_WITH_H3K4ME3_AND_H3K27ME3                         | -1.06 | 0.43 | 0 | 0 | 0 | not significant |
| 3319 | CHEOK_RESPONSE_TO_HD_MTX_DN                                        | -1.06 | 0.42 | 0 | 0 | 0 | not significant |
| 3320 | GO_ATPASE_ACTIVATOR_ACTIVITY                                       | -1.06 | 0.42 | 0 | 0 | 0 | not significant |
| 3321 | GO_REGULATION_OF_RNA_POLYMERASE_II_REGULATORY_REGION_SEQUENCE_S    | -1.06 | 0.42 | 0 | 0 | 0 | not significant |
| 3322 | GO_ACYLGLYCEROL_O_ACYLTRANSFERASE_ACTIVITY                         | -1.06 | 0.41 | 0 | 0 | 0 | not significant |
| 3323 | GO_RNA_POLYMERASE_II_GENERAL_TRANSCRIPTION_INITIATION_FACTOR_ACTIV | -1.06 | 0.41 | 0 | 0 | 0 | not significant |
| 3324 | GO_SKELETAL_MUSCLE_CELL_PROLIFERATION                              | -1.06 | 0.41 | 0 | 0 | 0 | not significant |
| 3325 | REACTOME_APOPTOTIC_FACTOR_MEDIATED_RESPONSE                        | -1.06 | 0.41 | 0 | 0 | 0 | not significant |
| 3326 | REACTOME_INTERLEUKIN_12_SIGNALING                                  | -1.06 | 0.41 | 0 | 0 | 0 | not significant |
| 3327 | STAMBOLSKY_BOUND_BY_MUTATED_TP53                                   | -1.06 | 0.41 | 0 | 0 | 0 | not significant |
| 3328 | GO_RESPONSE_TO_ACETYLCHOLINE                                       | -1.06 | 0.4  | 0 | 0 | 0 | not significant |
| 3329 | REACTOME_SIGNALING_BY_FGFR4_IN_DISEASE                             | -1.06 | 0.4  | 0 | 0 | 0 | not significant |
| 3330 | GO_REGULATION_OF_MACROPHAGE_DIFFERENTIATION                        | -1.06 | 0.39 | 0 | 0 | 0 | not significant |
| 3331 | GO_REGULATION_OF_MAINTENANCE_OF_SISTER_CHROMATID_COHESION          | -1.06 | 0.39 | 0 | 0 | 0 | not significant |
| 3332 | GO_UDP_GLUCCOSYLTRANSFERASE_ACTIVITY                               | -1.06 | 0.39 | 0 | 0 | 0 | not significant |
| 3333 | GO_INTRINSIC_APOPTOTIC_SIGNALING_PATHWAY_IN_RESPONSE_TO_OSMOTIC_S1 | -1.06 | 0.37 | 0 | 0 | 0 | not significant |
| 3334 | MYLLYKANGAS_AMPLIFICATION_HOT_SPOT_7                               | -1.06 | 0.37 | 0 | 0 | 0 | not significant |
| 3335 | GO_CHROMATOID_BODY                                                 | -1.06 | 0.36 | 0 | 0 | 0 | not significant |
| 3336 | GO_EMBRYONIC_RETINA_MORPHOGENESIS_IN_CAMERA_TYPE_EYE               | -1.06 | 0.35 | 0 | 0 | 0 | not significant |
| 3337 | GO_REGULATION_OF_SKELETAL_MUSCLE_ADAPTATION                        | -1.06 | 0.35 | 0 | 0 | 0 | not significant |
| 3338 | GO_ORGANONITROGEN_COMPOUND_CATABOLIC_PROCESS                       | -1.05 | 0.75 | 0 | 0 | 0 | not significant |
| 3339 | GO_INTERSPECIES_INTERACTION_BETWEEN_ORGANISMS                      | -1.05 | 0.74 | 0 | 0 | 0 | not significant |
| 3340 | ACEVEDO_LIVER_TUMOR_VS_NORMAL_ADJACENT_TISSUE_UP                   | -1.05 | 0.72 | 0 | 0 | 0 | not significant |
| 3341 | GO_CHROMATIN_ORGANIZATION                                          | -1.05 | 0.69 | 0 | 0 | 0 | not significant |
| 3342 | GO_HEAD_DEVELOPMENT                                                | -1.05 | 0.64 | 0 | 0 | 0 | not significant |
| 3343 | GO_REGULATION_OF_PROTEIN_COMPLEX_ASSEMBLY                          | -1.05 | 0.58 | 0 | 0 | 0 | not significant |
| 3344 | MARTINEZ_RB1_TARGETS_UP                                            | -1.05 | 0.58 | 0 | 0 | 0 | not significant |
| 3345 | GO_CELL_SURFACE_RECEPTOR_SIGNALING_PATHWAY_INVOLVED_IN_CELL_CELL   | -1.05 | 0.57 | 0 | 0 | 0 | not significant |
| 3346 | PILON_KLF1_TARGETS_UP                                              | -1.05 | 0.56 | 0 | 0 | 0 | not significant |
| 3347 | GO_ENZYME_INHIBITOR_ACTIVITY                                       | -1.05 | 0.55 | 0 | 0 | 0 | not significant |
| 3348 | GO_STRUCTURAL_MOLECULE_ACTIVITY                                    | -1.05 | 0.52 | 0 | 0 | 0 | not significant |
| 3349 | GO_POSITIVE_REGULATION_OF_PROTEIN_CATABOLIC_PROCESS                | -1.05 | 0.51 | 0 | 0 | 0 | not significant |
| 3350 | WANG_CLIM2_TARGETS_DN                                              | -1.05 | 0.49 | 0 | 0 | 0 | not significant |
| 3351 | FIGUEROA_AML_METHYLATION_CLUSTER_7_UP                              | -1.05 | 0.48 | 0 | 0 | 0 | not significant |
| 3352 | REACTOME_SIGNALING_BY_VEGF                                         | -1.05 | 0.48 | 0 | 0 | 0 | not significant |
| 3353 | GO_DNA_HELICASE_ACTIVITY                                           | -1.05 | 0.47 | 0 | 0 | 0 | not significant |
| 3354 | PELLICCIOTTA_HDAC_IN_ANTIGEN_PRESENTATION_UP                       | -1.05 | 0.46 | 0 | 0 | 0 | not significant |
| 3355 | PID_NFAT_3PATHWAY                                                  | -1.05 | 0.46 | 0 | 0 | 0 | not significant |
| 3356 | GO_DNA_PACKAGING_COMPLEX                                           | -1.05 | 0.45 | 0 | 0 | 0 | not significant |
| 3357 | GO_NEGATIVE_REGULATION_OF_PROTEOLYSIS_INVOLVED_IN_CELLULAR_PROTEI  | -1.05 | 0.45 | 0 | 0 | 0 | not significant |
| 3358 | GO_REGULATION_OF_ORGAN_GROWTH                                      | -1.05 | 0.45 | 0 | 0 | 0 | not significant |
| 3359 | SHAFER_IRF4_TARGETS_IN_ACTIVATED_B_LYMPHOCYTE                      | -1.05 | 0.45 | 0 | 0 | 0 | not significant |
| 3360 | GO_POSITIVE_REGULATION_OF_GLIOGENESIS                              | -1.05 | 0.44 | 0 | 0 | 0 | not significant |
| 3361 | LOPEZ_MBD_TARGETS_IMPRINTED_AND_X_LINKED                           | -1.05 | 0.43 | 0 | 0 | 0 | not significant |
| 3362 | CHR3P14                                                            | -1.05 | 0.42 | 0 | 0 | 0 | not significant |
| 3363 | GO_BONE_CELL_DEVELOPMENT                                           | -1.05 | 0.42 | 0 | 0 | 0 | not significant |
| 3364 | GO_MYELOID_LEUKOCYTE_CYTOKINE_PRODUCTION                           | -1.05 | 0.42 | 0 | 0 | 0 | not significant |
| 3365 | GO_NEGATIVE_REGULATION_OF_TELOMERE_MAINTENANCE                     | -1.05 | 0.42 | 0 | 0 | 0 | not significant |
| 3366 | GO_REGULATION_OF_PROTEIN_AUTOPHOSPHORYLATION                       | -1.05 | 0.42 | 0 | 0 | 0 | not significant |
| 3367 | IKEDA_MIR133_TARGETS_UP                                            | -1.05 | 0.42 | 0 | 0 | 0 | not significant |

|      |                                                                   |       |      |   |   |   |                 |
|------|-------------------------------------------------------------------|-------|------|---|---|---|-----------------|
| 3368 | PID_LIS1_PATHWAY                                                  | -1.05 | 0.42 | 0 | 0 | 0 | not significant |
| 3369 | CHR10P15                                                          | -1.05 | 0.41 | 0 | 0 | 0 | not significant |
| 3370 | GO_CELLULAR_COPPER_ION_HOMEOSTASIS                                | -1.05 | 0.41 | 0 | 0 | 0 | not significant |
| 3371 | GO_LYMPH_NODE_DEVELOPMENT                                         | -1.05 | 0.41 | 0 | 0 | 0 | not significant |
| 3372 | BIOCARTA_ACTINY_PATHWAY                                           | -1.05 | 0.4  | 0 | 0 | 0 | not significant |
| 3373 | CHR8P23                                                           | -1.05 | 0.4  | 0 | 0 | 0 | not significant |
| 3374 | GO_HEMATOPOIETIC_STEM_CELL_PROLIFERATION                          | -1.05 | 0.4  | 0 | 0 | 0 | not significant |
| 3375 | PID_NECTIN_PATHWAY                                                | -1.05 | 0.4  | 0 | 0 | 0 | not significant |
| 3376 | REACTOME_CREB1_PHOSPHORYLATION_THROUGH_NMDA_RECEPTOR_MEDIATED     | -1.05 | 0.4  | 0 | 0 | 0 | not significant |
| 3377 | REACTOME_SYNTHESIS_OF_IP2_IP_AND_INS_IN_THE_CYTOSOL               | -1.05 | 0.4  | 0 | 0 | 0 | not significant |
| 3378 | GO_MEGAKARYOCYTE_DEVELOPMENT                                      | -1.05 | 0.39 | 0 | 0 | 0 | not significant |
| 3379 | GO_NEGATIVE_REGULATION_OF_JNK_CASCADE                             | -1.05 | 0.39 | 0 | 0 | 0 | not significant |
| 3380 | GO_NUCLEOSIDE_TRIPHOSPHATE_DIPHOSPHATASE_ACTIVITY                 | -1.05 | 0.39 | 0 | 0 | 0 | not significant |
| 3381 | GO_POSITIVE_REGULATION_OF_SODIUM_ION_TRANSMEMBRANE_TRANSPORT      | -1.05 | 0.39 | 0 | 0 | 0 | not significant |
| 3382 | GO_SKELETAL_MUSCLE_ACETYLCHOLINE_GATED_CHANNEL_CLUSTERING         | -1.05 | 0.39 | 0 | 0 | 0 | not significant |
| 3383 | BIOCARTA_CDC42RAC_PATHWAY                                         | -1.05 | 0.38 | 0 | 0 | 0 | not significant |
| 3384 | HAHTOLA_CTCL_PATHOGENESIS                                         | -1.05 | 0.38 | 0 | 0 | 0 | not significant |
| 3385 | GO_ASTRAL_MICROTUBULE_ORGANIZATION                                | -1.05 | 0.37 | 0 | 0 | 0 | not significant |
| 3386 | GO_NEGATIVE_REGULATION_OF_PROTEIN_EXPORT_FROM_NUCLEUS             | -1.05 | 0.37 | 0 | 0 | 0 | not significant |
| 3387 | GO_TRANSLOCATION_OF_MOLECULES_INTO_HOST                           | -1.05 | 0.37 | 0 | 0 | 0 | not significant |
| 3388 | GO_POSITIVE_REGULATION_OF_OLIGODENDROCYTE_DIFFERENTIATION         | -1.05 | 0.36 | 0 | 0 | 0 | not significant |
| 3389 | GO_SNRNP_BINDING                                                  | -1.05 | 0.36 | 0 | 0 | 0 | not significant |
| 3390 | REACTOME_SODIUM_CALCIIUM_EXCHANGERS                               | -1.05 | 0.36 | 0 | 0 | 0 | not significant |
| 3391 | SHIN_B_CELL_LYMPHOMA_CLUSTER_9                                    | -1.05 | 0.36 | 0 | 0 | 0 | not significant |
| 3392 | GO_CELL_DIFFERENTIATION_INVOLVED_IN_METANEPHROS_DEVELOPMENT       | -1.05 | 0.35 | 0 | 0 | 0 | not significant |
| 3393 | GO_POSITIVE_REGULATION_OF_SPINDLE_CHECKPOINT                      | -1.05 | 0.35 | 0 | 0 | 0 | not significant |
| 3394 | GO_CELLULAR_RESPONSE_TO_SODIUM_ARSENITE                           | -1.05 | 0.34 | 0 | 0 | 0 | not significant |
| 3395 | GO_PYRUVATE_DEHYDROGENASE_ACTIVITY                                | -1.05 | 0.34 | 0 | 0 | 0 | not significant |
| 3396 | GO_REGULATION_OF_ALKALINE_PHOSPHATASE_ACTIVITY                    | -1.05 | 0.34 | 0 | 0 | 0 | not significant |
| 3397 | GO_TRANSFERRIN_RECEPTOR_BINDING                                   | -1.05 | 0.34 | 0 | 0 | 0 | not significant |
| 3398 | REACTOME_FBXW7_MUTANTS_AND_NOTCH1_IN_CANCER                       | -1.05 | 0.34 | 0 | 0 | 0 | not significant |
| 3399 | GO_DNA_METABOLIC_PROCESS                                          | -1.04 | 0.84 | 0 | 0 | 0 | not significant |
| 3400 | GO_POSITIVE_REGULATION_OF_HYDROLASE_ACTIVITY                      | -1.04 | 0.71 | 0 | 0 | 0 | not significant |
| 3401 | BYSTRYKH_HEMATOPOIESIS_STEM_CELL_QTL_TRANS                        | -1.04 | 0.61 | 0 | 0 | 0 | not significant |
| 3402 | GO_CENTRAL_NERVOUS_SYSTEM_DEVELOPMENT                             | -1.04 | 0.57 | 0 | 0 | 0 | not significant |
| 3403 | GO_TRANSCRIPTION_COREGULATOR_ACTIVITY                             | -1.04 | 0.57 | 0 | 0 | 0 | not significant |
| 3404 | GO_GTPASE_BINDING                                                 | -1.04 | 0.52 | 0 | 0 | 0 | not significant |
| 3405 | GO_ACTIVATION_OF_PROTEIN_KINASE_ACTIVITY                          | -1.04 | 0.49 | 0 | 0 | 0 | not significant |
| 3406 | GO_NEGATIVE_REGULATION_OF_BINDING                                 | -1.04 | 0.48 | 0 | 0 | 0 | not significant |
| 3407 | GO_CYTOPLASMIC_TRANSLATION                                        | -1.04 | 0.47 | 0 | 0 | 0 | not significant |
| 3408 | GO_CHROMATIN_REMODELING                                           | -1.04 | 0.46 | 0 | 0 | 0 | not significant |
| 3409 | GO_REGIONALIZATION                                                | -1.04 | 0.46 | 0 | 0 | 0 | not significant |
| 3410 | GO_REGULATION_OF_PROTEIN_POLYMERIZATION                           | -1.04 | 0.46 | 0 | 0 | 0 | not significant |
| 3411 | KEGG_GNRH_SIGNALING_PATHWAY                                       | -1.04 | 0.46 | 0 | 0 | 0 | not significant |
| 3412 | REACTOME_L1CAM_INTERACTIONS                                       | -1.04 | 0.46 | 0 | 0 | 0 | not significant |
| 3413 | GO_NEGATIVE_REGULATION_OF_HEMOPOIESIS                             | -1.04 | 0.45 | 0 | 0 | 0 | not significant |
| 3414 | GO_PURINE_CONTAINING_COMPOUND_BIOSYNTHETIC_PROCESS                | -1.04 | 0.45 | 0 | 0 | 0 | not significant |
| 3415 | GO_RIBOSOMAL_SUBUNIT                                              | -1.04 | 0.45 | 0 | 0 | 0 | not significant |
| 3416 | GO_SMOOTH_MUSCLE_CELL_MIGRATION                                   | -1.04 | 0.45 | 0 | 0 | 0 | not significant |
| 3417 | FLECHNER_PBL_KIDNEY_TRANSPLANT_REJECTED_VS_OK_UP                  | -1.04 | 0.44 | 0 | 0 | 0 | not significant |
| 3418 | LAIHO_COLORECTAL_CANCER_SERRATED_UP                               | -1.04 | 0.44 | 0 | 0 | 0 | not significant |
| 3419 | BROWNE_HCMV_INFECTION_10HR_UP                                     | -1.04 | 0.43 | 0 | 0 | 0 | not significant |
| 3420 | REACTOME_REGULATION_OF_TP53_EXPRESSION_AND_DEGRADATION            | -1.04 | 0.43 | 0 | 0 | 0 | not significant |
| 3421 | REACTOME_RUNX1_INTERACTS_WITH_CO_FACTORS_WHOSE_PRECISE_EFFECT_C   | -1.04 | 0.43 | 0 | 0 | 0 | not significant |
| 3422 | TIEN_INTESTINE_PROBIOTICS_6HR_DN                                  | -1.04 | 0.43 | 0 | 0 | 0 | not significant |
| 3423 | GO_PROTEIN_HETEROOLIGOMERIZATION                                  | -1.04 | 0.42 | 0 | 0 | 0 | not significant |
| 3424 | GO_REGULATION_OF_CARDIAC_MUSCLE_CONTRACTION                       | -1.04 | 0.42 | 0 | 0 | 0 | not significant |
| 3425 | REACTOME_RESPONSE_TO_ELEVATED_PLATELET_CYTOSOLIC_CA2PLUS          | -1.04 | 0.42 | 0 | 0 | 0 | not significant |
| 3426 | BARRIER_CANCER_RELAPSE_NORMAL_SAMPLE_UP                           | -1.04 | 0.41 | 0 | 0 | 0 | not significant |
| 3427 | GO_POSITIVE_REGULATION_OF_NITRIC_OXIDE_SYNTHASE_ACTIVITY          | -1.04 | 0.41 | 0 | 0 | 0 | not significant |
| 3428 | GO_PROTEIN_TYROSINE_SERINE_THREONINE_PHOSPHATASE_ACTIVITY         | -1.04 | 0.41 | 0 | 0 | 0 | not significant |
| 3429 | GO_REGULATION_OF_VOLTAGE_GATED_CALCIIUM_CHANNEL_ACTIVITY          | -1.04 | 0.41 | 0 | 0 | 0 | not significant |
| 3430 | REACTOME_SIGNALING_BY_FGFR_IN_DISEASE                             | -1.04 | 0.41 | 0 | 0 | 0 | not significant |
| 3431 | GO_LYSOPHOSPHOLIPID_ACYLTRANSFERASE_ACTIVITY                      | -1.04 | 0.4  | 0 | 0 | 0 | not significant |
| 3432 | GO_SARCOPLASMIC_RETICULUM_MEMBRANE                                | -1.04 | 0.4  | 0 | 0 | 0 | not significant |
| 3433 | GO_SYNAPTIC_TRANSMISSION_GABAERGIC                                | -1.04 | 0.4  | 0 | 0 | 0 | not significant |
| 3434 | NUNODA_RESPONSE_TO_DASATINIB_IMATINIB_UP                          | -1.04 | 0.4  | 0 | 0 | 0 | not significant |
| 3435 | BIOCARTA_P53HYPOXIA_PATHWAY                                       | -1.04 | 0.39 | 0 | 0 | 0 | not significant |
| 3436 | REACTOME_TP53_REGULATES_TRANSCRIPTION_OF_SEVERAL_ADDITIONAL_CELL  | -1.04 | 0.39 | 0 | 0 | 0 | not significant |
| 3437 | ZUCCHI_METASTASIS_UP                                              | -1.04 | 0.39 | 0 | 0 | 0 | not significant |
| 3438 | GO_NUCLEOTIDE_EXCISION_REPAIR_DNA_DAMAGE_RECOGNITION              | -1.04 | 0.38 | 0 | 0 | 0 | not significant |
| 3439 | GO_REGULATION_OF_SYNAPTIC_TRANSMISSION_GABAERGIC                  | -1.04 | 0.38 | 0 | 0 | 0 | not significant |
| 3440 | GO_U2_SNRNP                                                       | -1.04 | 0.38 | 0 | 0 | 0 | not significant |
| 3441 | PID_CXCR3_PATHWAY                                                 | -1.04 | 0.38 | 0 | 0 | 0 | not significant |
| 3442 | WANG_RECURRENT_LIVER_CANCER_DN                                    | -1.04 | 0.38 | 0 | 0 | 0 | not significant |
| 3443 | GO_ADA2_GCNS_ADA3_TRANSCRIPTION_ACTIVATOR_COMPLEX                 | -1.04 | 0.37 | 0 | 0 | 0 | not significant |
| 3444 | GO_COENZYME_CATABOLIC_PROCESS                                     | -1.04 | 0.37 | 0 | 0 | 0 | not significant |
| 3445 | GO_NEGATIVE_REGULATION_OF_MICROTUBULE_POLYMERIZATION              | -1.04 | 0.37 | 0 | 0 | 0 | not significant |
| 3446 | GO_PROTEASOME_CORE_COMPLEX                                        | -1.04 | 0.37 | 0 | 0 | 0 | not significant |
| 3447 | REACTOME_CALCINEURIN_ACTIVATES_NFAT                               | -1.04 | 0.37 | 0 | 0 | 0 | not significant |
| 3448 | GO_CELLULAR_RESPONSE_TO_SALT                                      | -1.04 | 0.36 | 0 | 0 | 0 | not significant |
| 3449 | GO_EUKARYOTIC_TRANSLATION_INITIATION_FACTOR_3_COMPLEX             | -1.04 | 0.36 | 0 | 0 | 0 | not significant |
| 3450 | GO_NUCLEAR_BODY_ORGANIZATION                                      | -1.04 | 0.36 | 0 | 0 | 0 | not significant |
| 3451 | GO_SMOOTHENED_SIGNALING_PATHWAY_INVOLVED_IN_DORSAL_VENTRAL_NEURV  | -1.04 | 0.36 | 0 | 0 | 0 | not significant |
| 3452 | GO_HIGH_DENSITY_LIPOPROTEIN_PARTICLE                              | -1.04 | 0.35 | 0 | 0 | 0 | not significant |
| 3453 | GO_OXIDOREDUCTASE_ACTIVITY_ACTING_ON_THE_CH_NH2_GROUP_OF_DONORS   | -1.04 | 0.35 | 0 | 0 | 0 | not significant |
| 3454 | GO_TRNA_THIO_MODIFICATION                                         | -1.04 | 0.35 | 0 | 0 | 0 | not significant |
| 3455 | MIKKELSEN_MCV6_ICP_WITH_H3K4ME3_AND_H3K27ME3                      | -1.04 | 0.35 | 0 | 0 | 0 | not significant |
| 3456 | GO_MESENCHYMAL_TO_EPITHELIAL_TRANSITION_INVOLVED_IN_METANEPHROS_M | -1.04 | 0.34 | 0 | 0 | 0 | not significant |
| 3457 | REACTOME_CGMP_EFFECTS                                             | -1.04 | 0.34 | 0 | 0 | 0 | not significant |
| 3458 | REACTOME_NEGATIVE_REGULATION_OF_ACTIVITY_OF_TFAP2_AP_2_FAMILY_TRA | -1.04 | 0.34 | 0 | 0 | 0 | not significant |
| 3459 | GO_POSITIVE_REGULATION_OF_CELL_CYCLE_CHECKPOINT                   | -1.04 | 0.33 | 0 | 0 | 0 | not significant |
| 3460 | REACTOME_SENSING_OF_DNA_DOUBLE_STRAND_BREAKS                      | -1.04 | 0.32 | 0 | 0 | 0 | not significant |
| 3461 | FIGUEROA_AML_METHYLATION_CLUSTER_2_DN                             | -1.04 | 0.31 | 0 | 0 | 0 | not significant |
| 3462 | REACTOME_DEVELOPMENTAL_BIOLOGY                                    | -1.03 | 0.58 | 0 | 0 | 0 | not significant |
| 3463 | ACEVEDO_METHYLATED_IN_LIVER_CANCER_DN                             | -1.03 | 0.56 | 0 | 0 | 0 | not significant |
| 3464 | GO_PERINUCLEAR_REGION_OF_CYTOPLASM                                | -1.03 | 0.54 | 0 | 0 | 0 | not significant |
| 3465 | GO_EMBRYO_DEVELOPMENT_ENDING_IN_BIRTH_OR_EGG_HATCHING             | -1.03 | 0.5  | 0 | 0 | 0 | not significant |
| 3466 | LU_EZH2_TARGETS_DN                                                | -1.03 | 0.5  | 0 | 0 | 0 | not significant |
| 3467 | GRADE_COLON_CANCER_UP                                             | -1.03 | 0.47 | 0 | 0 | 0 | not significant |
| 3468 | GO_CATALYTIC_ACTIVITY_ACTING_ON_DNA                               | -1.03 | 0.46 | 0 | 0 | 0 | not significant |
| 3469 | GO_NUCLEAR_CHROMOSOME_TELOMERIC_REGION                            | -1.03 | 0.45 | 0 | 0 | 0 | not significant |
| 3470 | GO_SINGLE_STRANDED_DNA_BINDING                                    | -1.03 | 0.45 | 0 | 0 | 0 | not significant |
| 3471 | MULLIGHAN_NPM1_SIGNATURE_3_UP                                     | -1.03 | 0.45 | 0 | 0 | 0 | not significant |
| 3472 | GO_REGULATION_OF_SYMBIOSIS_ENCOMPASSING_MUTUALISM_THROUGH_PARASI  | -1.03 | 0.44 | 0 | 0 | 0 | not significant |
| 3473 | GO_TYPE_I_INTERFERON_PRODUCTION                                   | -1.03 | 0.44 | 0 | 0 | 0 | not significant |
| 3474 | GO_HINDBRAIN_MORPHOGENESIS                                        | -1.03 | 0.43 | 0 | 0 | 0 | not significant |
| 3475 | GO_REGULATION_OF_CELL_CYCLE_G1_S_PHASE_TRANSITION                 | -1.03 | 0.43 | 0 | 0 | 0 | not significant |
| 3476 | MCMURRAY_TP53_HRAS_COOPERATION_RESPONSE_DN                        | -1.03 | 0.43 | 0 | 0 | 0 | not significant |

|      |                                                                  |       |      |   |   |   |                 |
|------|------------------------------------------------------------------|-------|------|---|---|---|-----------------|
| 3477 | REACTOME_ONCOGENIC_MAPK_SIGNALING                                | -1.03 | 0.43 | 0 | 0 | 0 | not significant |
| 3478 | GO_CELL_CORTEX_PART                                              | -1.03 | 0.42 | 0 | 0 | 0 | not significant |
| 3479 | GO_POSITIVE_REGULATION_OF_DEVELOPMENTAL_GROWTH                   | -1.03 | 0.42 | 0 | 0 | 0 | not significant |
| 3480 | HESS_TARGETS_OF_HOXA9_AND_MEIS1_UP                               | -1.03 | 0.42 | 0 | 0 | 0 | not significant |
| 3481 | REACTOME_ANCHORING_OF_THE_BASAL_BODY_TO_THE_PLASMA_MEMBRANE      | -1.03 | 0.42 | 0 | 0 | 0 | not significant |
| 3482 | ATF2_S_UP.V1_UP                                                  | -1.03 | 0.41 | 0 | 0 | 0 | not significant |
| 3483 | GO_POSITIVE_REGULATION_OF_PEPTIDASE_ACTIVITY                     | -1.03 | 0.41 | 0 | 0 | 0 | not significant |
| 3484 | GO_POSITIVE_REGULATION_OF_PROTEIN_POLYMERIZATION                 | -1.03 | 0.41 | 0 | 0 | 0 | not significant |
| 3485 | KEGG_VASOPRESSIN_REGULATED_WATER_REABSORPTION                    | -1.03 | 0.41 | 0 | 0 | 0 | not significant |
| 3486 | ZHANG_TLX_TARGETS_DN                                             | -1.03 | 0.41 | 0 | 0 | 0 | not significant |
| 3487 | GO_PEPTIDYL_PROLINE_MODIFICATION                                 | -1.03 | 0.4  | 0 | 0 | 0 | not significant |
| 3488 | GO_SOMATIC_STEM_CELL_POPULATION_MAINTENANCE                      | -1.03 | 0.4  | 0 | 0 | 0 | not significant |
| 3489 | GO_SPLICEOSOMAL_COMPLEX_ASSEMBLY                                 | -1.03 | 0.4  | 0 | 0 | 0 | not significant |
| 3490 | GRADE_COLON_VS_RECTAL_CANCER_UP                                  | -1.03 | 0.4  | 0 | 0 | 0 | not significant |
| 3491 | PARK_HSC_MARKERS                                                 | -1.03 | 0.4  | 0 | 0 | 0 | not significant |
| 3492 | PID_HIF1_TFPATHWAY                                               | -1.03 | 0.4  | 0 | 0 | 0 | not significant |
| 3493 | TERAO_AOX4_TARGETS_SKIN_UP                                       | -1.03 | 0.4  | 0 | 0 | 0 | not significant |
| 3494 | ZHU_CMV_ALL_DN                                                   | -1.03 | 0.4  | 0 | 0 | 0 | not significant |
| 3495 | CHESLER_BRAIN_QTL_CIS                                            | -1.03 | 0.39 | 0 | 0 | 0 | not significant |
| 3496 | GARGALOVIC_RESPONSE_TO_OXIDIZED_PHOSPHOLIPIDS_MAGENTA_DN         | -1.03 | 0.39 | 0 | 0 | 0 | not significant |
| 3497 | GO_NEGATIVE_REGULATION_OF_CELLULAR_RESPONSE_TO_TRANSFORMING_GRO  | -1.03 | 0.39 | 0 | 0 | 0 | not significant |
| 3498 | GO_POSITIVE_REGULATION_OF_CELLULAR_RESPONSE_TO_TRANSFORMING_GRO  | -1.03 | 0.39 | 0 | 0 | 0 | not significant |
| 3499 | HEIDENBLAD_AMPILICON_12P11_12_UP                                 | -1.03 | 0.39 | 0 | 0 | 0 | not significant |
| 3500 | KATSANOUE_ELAVL1_TARGETS_DN                                      | -1.03 | 0.39 | 0 | 0 | 0 | not significant |
| 3501 | MCBRYAN_PUBERTAL_TGFB1_TARGETS_UP                                | -1.03 | 0.39 | 0 | 0 | 0 | not significant |
| 3502 | REACTOME_SYNTHESIS_OF_PIP3_AT_THE_PLASMA_MEMBRANE                | -1.03 | 0.39 | 0 | 0 | 0 | not significant |
| 3503 | ABDELMOHSEN_ELAVL4_TARGETS                                       | -1.03 | 0.38 | 0 | 0 | 0 | not significant |
| 3504 | GO_HISTONE_H4_DEACETYLATION                                      | -1.03 | 0.38 | 0 | 0 | 0 | not significant |
| 3505 | GO_MEIOTIC_CHROMOSOME_SEPARATION                                 | -1.03 | 0.38 | 0 | 0 | 0 | not significant |
| 3506 | GO_MRNA_METHYLTRANSFERASE_ACTIVITY                               | -1.03 | 0.38 | 0 | 0 | 0 | not significant |
| 3507 | GO_PHOSPHATIDYLINOSITOL_DEPHOSPHORYLATION                        | -1.03 | 0.38 | 0 | 0 | 0 | not significant |
| 3508 | KEGG_TGF_BETA_SIGNALING_PATHWAY                                  | -1.03 | 0.38 | 0 | 0 | 0 | not significant |
| 3509 | MYLLYKANGAS_AMPLIFICATION_HOT_SPOT_27                            | -1.03 | 0.38 | 0 | 0 | 0 | not significant |
| 3510 | PID_JFNG_PATHWAY                                                 | -1.03 | 0.38 | 0 | 0 | 0 | not significant |
| 3511 | WEIGEL_OXIDATIVE_STRESS_BY_HNE_AND_H2O2                          | -1.03 | 0.38 | 0 | 0 | 0 | not significant |
| 3512 | GO_HISTONE_H4_K16_ACETYLATION                                    | -1.03 | 0.37 | 0 | 0 | 0 | not significant |
| 3513 | GO_NEGATIVE_REGULATION_OF_MYOBlast_DIFFERENTIATION               | -1.03 | 0.37 | 0 | 0 | 0 | not significant |
| 3514 | GO_PROTEIN_PHOSPHATASE_ACTIVATOR_ACTIVITY                        | -1.03 | 0.37 | 0 | 0 | 0 | not significant |
| 3515 | GO_REGULATION_OF_NUCLEOTIDE_BIOSYNTHETIC_PROCESS                 | -1.03 | 0.37 | 0 | 0 | 0 | not significant |
| 3516 | PID_FRA_PATHWAY                                                  | -1.03 | 0.37 | 0 | 0 | 0 | not significant |
| 3517 | REACTOME_FOXO_MEDIATED_TRANSCRIPTION_OF_CELL_DEATH_GENES         | -1.03 | 0.37 | 0 | 0 | 0 | not significant |
| 3518 | GO_APOPTOTIC_DNA_FRAGMENTATION                                   | -1.03 | 0.36 | 0 | 0 | 0 | not significant |
| 3519 | GO_ENDOPLASMIC_RETICULUM_SUBCOMPARTMENT                          | -1.03 | 0.36 | 0 | 0 | 0 | not significant |
| 3520 | GO_GUANOSINE_CONTAINING_COMPOUND_BIOSYNTHETIC_PROCESS            | -1.03 | 0.36 | 0 | 0 | 0 | not significant |
| 3521 | GO_MYELIN_ASSEMBLY                                               | -1.03 | 0.36 | 0 | 0 | 0 | not significant |
| 3522 | GO_POSITIVE_REGULATION_OF_HELICASE_ACTIVITY                      | -1.03 | 0.36 | 0 | 0 | 0 | not significant |
| 3523 | REACTOME_INTEGRATION_OF_PROVIRUS                                 | -1.03 | 0.36 | 0 | 0 | 0 | not significant |
| 3524 | BERENJENO_TRANSFORMED_BY_RHOA_FOREVER_DN                         | -1.03 | 0.35 | 0 | 0 | 0 | not significant |
| 3525 | GO_CERAMIDE_TRANSPORTER_ACTIVITY                                 | -1.03 | 0.35 | 0 | 0 | 0 | not significant |
| 3526 | GO_NUCLEOSIDE_MONOPHOSPHATE_KINASE_ACTIVITY                      | -1.03 | 0.35 | 0 | 0 | 0 | not significant |
| 3527 | GO_POLYADENYLATION_DEPENDENT_RNA_CATABOLIC_PROCESS               | -1.03 | 0.35 | 0 | 0 | 0 | not significant |
| 3528 | GO_REGULATION_OF_HEXOKINASE_ACTIVITY                             | -1.03 | 0.35 | 0 | 0 | 0 | not significant |
| 3529 | GO_REGULATION_OF_RESPIRATORY_SYSTEM_PROCESS                      | -1.03 | 0.35 | 0 | 0 | 0 | not significant |
| 3530 | GO_DEADENYLATION_DEPENDENT_DECAPPING_OF_NUCLEAR_TRANSCRIBED_MRN  | -1.03 | 0.34 | 0 | 0 | 0 | not significant |
| 3531 | GO_SPERM_PRINCIPAL_PIECE                                         | -1.03 | 0.34 | 0 | 0 | 0 | not significant |
| 3532 | REACTOME_ACTIVATION_OF_CASPASES_THROUGH_APOPTOSOME_MEDIATED_CL   | -1.03 | 0.34 | 0 | 0 | 0 | not significant |
| 3533 | WEBER_METHYLATED_IN_COLON_CANCER                                 | -1.03 | 0.34 | 0 | 0 | 0 | not significant |
| 3534 | GO_NEGATIVE_REGULATION_OF_RNA_POLYMERASE_II_REGULATORY_REGION_SE | -1.03 | 0.33 | 0 | 0 | 0 | not significant |
| 3535 | GO_NEGATIVE_REGULATION_OF_SYNAPTIC_VESICLE_TRANSPORT             | -1.03 | 0.33 | 0 | 0 | 0 | not significant |
| 3536 | REACTOME_EICOSANOIDS                                             | -1.03 | 0.33 | 0 | 0 | 0 | not significant |
| 3537 | REACTOME_SCAVENGING_BY_CLASS_A_RECEPTORS                         | -1.03 | 0.33 | 0 | 0 | 0 | not significant |
| 3538 | GO_MEMBRANE_ORGANIZATION                                         | -1.02 | 0.61 | 0 | 0 | 0 | not significant |
| 3539 | REACTOME_AXON_GUIDANCE                                           | -1.02 | 0.48 | 0 | 0 | 0 | not significant |
| 3540 | FLECHNER_PBL_KIDNEY_TRANSPLANT_OK_VS_DONOR_UP                    | -1.02 | 0.44 | 0 | 0 | 0 | not significant |
| 3541 | PATIL_LIVER_CANCER                                               | -1.02 | 0.44 | 0 | 0 | 0 | not significant |
| 3542 | GO_ORGANELLE_INNER_MEMBRANE                                      | -1.02 | 0.43 | 0 | 0 | 0 | not significant |
| 3543 | GO_OSSIFICATION                                                  | -1.02 | 0.43 | 0 | 0 | 0 | not significant |
| 3544 | GO_TRANSCRIPTION_COACTIVATOR_ACTIVITY                            | -1.02 | 0.43 | 0 | 0 | 0 | not significant |
| 3545 | KIM_GASTRIC_CANCER_CHEMOSENSITIVITY                              | -1.02 | 0.43 | 0 | 0 | 0 | not significant |
| 3546 | REACTOME_HEMOSTASIS                                              | -1.02 | 0.43 | 0 | 0 | 0 | not significant |
| 3547 | GO_KINASE_REGULATOR_ACTIVITY                                     | -1.02 | 0.42 | 0 | 0 | 0 | not significant |
| 3548 | GO_CARBOHYDRATE_CATABOLIC_PROCESS                                | -1.02 | 0.41 | 0 | 0 | 0 | not significant |
| 3549 | REACTOME_AUTOPHAGY                                               | -1.02 | 0.41 | 0 | 0 | 0 | not significant |
| 3550 | BIOCARTA_P38MAPK_PATHWAY                                         | -1.02 | 0.4  | 0 | 0 | 0 | not significant |
| 3551 | GO_CYTOPLASMIC_MICROTUBULE                                       | -1.02 | 0.4  | 0 | 0 | 0 | not significant |
| 3552 | QL_PLASMACYTOMA_DN                                               | -1.02 | 0.4  | 0 | 0 | 0 | not significant |
| 3553 | ACEVEDO_NORMAL_TISSUE_ADJACENT_TO_LIVER_TUMOR_UP                 | -1.02 | 0.39 | 0 | 0 | 0 | not significant |
| 3554 | GO_METHYLATION                                                   | -1.02 | 0.39 | 0 | 0 | 0 | not significant |
| 3555 | GO_MITOCHONDRIAL_TRANSPORT                                       | -1.02 | 0.39 | 0 | 0 | 0 | not significant |
| 3556 | GO_NEURON_MATURATION                                             | -1.02 | 0.39 | 0 | 0 | 0 | not significant |
| 3557 | GO_POSITIVE_REGULATION_OF_MITOTIC_NUCLEAR_DIVISION               | -1.02 | 0.39 | 0 | 0 | 0 | not significant |
| 3558 | REACTOME_SIGNALING_BY_MET                                        | -1.02 | 0.39 | 0 | 0 | 0 | not significant |
| 3559 | BROWNE_HCMV_INFECTION_24HR_UP                                    | -1.02 | 0.38 | 0 | 0 | 0 | not significant |
| 3560 | DARWICHE_SKIN_TUMOR_PROMOTER_DN                                  | -1.02 | 0.38 | 0 | 0 | 0 | not significant |
| 3561 | GO_CLATHRIN_VESICLE_COAT                                         | -1.02 | 0.38 | 0 | 0 | 0 | not significant |
| 3562 | GO_CYTOKINE_ACTIVITY                                             | -1.02 | 0.38 | 0 | 0 | 0 | not significant |
| 3563 | GO_PHOTORECEPTOR_OUTER_SEGMENT                                   | -1.02 | 0.38 | 0 | 0 | 0 | not significant |
| 3564 | GO_PROTEIN_HOMOTETRAMERIZATION                                   | -1.02 | 0.38 | 0 | 0 | 0 | not significant |
| 3565 | GO_REGULATION_OF_SYNAPSE_ASSEMBLY                                | -1.02 | 0.38 | 0 | 0 | 0 | not significant |
| 3566 | GO_THYROID_HORMONE_RECEPTOR_BINDING                              | -1.02 | 0.38 | 0 | 0 | 0 | not significant |
| 3567 | HOLLEMAN_PREDNISOLONE_RESISTANCE_B_ALL_UP                        | -1.02 | 0.38 | 0 | 0 | 0 | not significant |
| 3568 | REACTOME_PLATELET_AGGREGATION_PLUGIN_FORMATION                   | -1.02 | 0.38 | 0 | 0 | 0 | not significant |
| 3569 | BOYVAULT_LIVER_CANCER_SUBCLASS_G12_UP                            | -1.02 | 0.37 | 0 | 0 | 0 | not significant |
| 3570 | GO_NEGATIVE_REGULATION_OF_ADHERENS_JUNCTION_ORGANIZATION         | -1.02 | 0.37 | 0 | 0 | 0 | not significant |
| 3571 | GO_PERICENTRIC_HETEROCHROMATIN                                   | -1.02 | 0.37 | 0 | 0 | 0 | not significant |
| 3572 | GO_POSITIVE_REGULATION_OF_ADHERENS_JUNCTION_ORGANIZATION         | -1.02 | 0.37 | 0 | 0 | 0 | not significant |
| 3573 | GO_POSITIVE_REGULATION_OF_NUCLEAR_DIVISION                       | -1.02 | 0.37 | 0 | 0 | 0 | not significant |
| 3574 | GO_PROTEIN_HETEROETRAMERIZATION                                  | -1.02 | 0.37 | 0 | 0 | 0 | not significant |
| 3575 | GO_PROTEIN_LOCALIZATION_TO_KINETOCHORE                           | -1.02 | 0.37 | 0 | 0 | 0 | not significant |
| 3576 | GO_REGULATION_OF_HEART_GROWTH                                    | -1.02 | 0.37 | 0 | 0 | 0 | not significant |
| 3577 | VART_KSHV_INFECTION_ANGIOGENIC_MARKERS_DN                        | -1.02 | 0.37 | 0 | 0 | 0 | not significant |
| 3578 | ABRAHAM_ALPC_VS_MULTIPLE_MYELOMA_UP                              | -1.02 | 0.36 | 0 | 0 | 0 | not significant |
| 3579 | GO_CARDIAC_CHAMBER_MORPHOGENESIS                                 | -1.02 | 0.36 | 0 | 0 | 0 | not significant |
| 3580 | GO_CELLULAR_ALDEHYDE_METABOLIC_PROCESS                           | -1.02 | 0.36 | 0 | 0 | 0 | not significant |
| 3581 | GO_M_BAND                                                        | -1.02 | 0.36 | 0 | 0 | 0 | not significant |
| 3582 | GO_NEGATIVE_REGULATION_OF_PROTEIN_LOCALIZATION_TO_MEMBRANE       | -1.02 | 0.36 | 0 | 0 | 0 | not significant |
| 3583 | GO_NUCLEOTIDE_SALVAGE                                            | -1.02 | 0.36 | 0 | 0 | 0 | not significant |
| 3584 | GO_POSITIVE_REGULATION_OF_SEQUESTERING_OF_CALCIIUM_ION           | -1.02 | 0.36 | 0 | 0 | 0 | not significant |
| 3585 | GO_PRESYNAPSE_ORGANIZATION                                       | -1.02 | 0.36 | 0 | 0 | 0 | not significant |

|      |                                                                     |       |      |   |   |   |                 |
|------|---------------------------------------------------------------------|-------|------|---|---|---|-----------------|
| 3586 | ALONSO_METASTASIS_DN                                                | -1.02 | 0.35 | 0 | 0 | 0 | not significant |
| 3587 | GO_CAMP_RESPONSE_ELEMENT_BINDING_PROTEIN_BINDING                    | -1.02 | 0.35 | 0 | 0 | 0 | not significant |
| 3588 | GO_CARBOXY_TERMINAL_DOMAIN_PROTEIN_KINASE_COMPLEX                   | -1.02 | 0.35 | 0 | 0 | 0 | not significant |
| 3589 | GO_CORTICOSTEROID_RECEPTOR_SIGNALING_PATHWAY                        | -1.02 | 0.35 | 0 | 0 | 0 | not significant |
| 3590 | GO_ESTABLISHMENT_OF_MITOCHONDRION_LOCALIZATION                      | -1.02 | 0.35 | 0 | 0 | 0 | not significant |
| 3591 | GO_INTRONIC_TRANSCRIPTION_REGULATORY_REGION_DNA_BINDING             | -1.02 | 0.35 | 0 | 0 | 0 | not significant |
| 3592 | GO_LYS48_SPECIFIC_DEUBIQUITINASE_ACTIVITY                           | -1.02 | 0.35 | 0 | 0 | 0 | not significant |
| 3593 | GO_PROTEIN_LOCALIZATION_TO_CELL_JUNCTION                            | -1.02 | 0.35 | 0 | 0 | 0 | not significant |
| 3594 | GO_SKELETAL_MUSCLE_TISSUE_REGENERATION                              | -1.02 | 0.35 | 0 | 0 | 0 | not significant |
| 3595 | MURATA_VIRULENCE_OF_H_PILORI                                        | -1.02 | 0.35 | 0 | 0 | 0 | not significant |
| 3596 | CHR10P14                                                            | -1.02 | 0.34 | 0 | 0 | 0 | not significant |
| 3597 | GO_POSITIVE_REGULATION_OF_NUCLEAR_CELL_CYCLE_DNA_REPLICATION        | -1.02 | 0.34 | 0 | 0 | 0 | not significant |
| 3598 | GO_REGULATION_OF_RNA_BINDING                                        | -1.02 | 0.34 | 0 | 0 | 0 | not significant |
| 3599 | GO_RNA_POLYMERASE_II_INTRONIC_TRANSCRIPTION_REGULATORY_REGION_SEC   | -1.02 | 0.34 | 0 | 0 | 0 | not significant |
| 3600 | MARIADASON_RESPONSE_TO_BUTYRATE_CURCUMIN_SULINDAC_TSA_8             | -1.02 | 0.34 | 0 | 0 | 0 | not significant |
| 3601 | REACTOME_TETRAHYDROBIPTERIN_BH_SYNTHESIS_RECYCLING_SALVAGE_AND      | -1.02 | 0.34 | 0 | 0 | 0 | not significant |
| 3602 | SAGIV_CD24_TARGETS_UP                                               | -1.02 | 0.34 | 0 | 0 | 0 | not significant |
| 3603 | GO_CAMP_DEPENDENT_PROTEIN_KINASE_ACTIVITY                           | -1.02 | 0.33 | 0 | 0 | 0 | not significant |
| 3604 | GO_MITOTIC_SPINDLE_ASTRAL_MICROTUBULE                               | -1.02 | 0.33 | 0 | 0 | 0 | not significant |
| 3605 | GO_NEGATIVE_REGULATION_OF_GLYCOLYTIC_PROCESS                        | -1.02 | 0.33 | 0 | 0 | 0 | not significant |
| 3606 | REACTOME_WNT5A_DEPENDENT_INTERNALIZATION_OF_FZD4                    | -1.02 | 0.33 | 0 | 0 | 0 | not significant |
| 3607 | XU_HGF_TARGETS_REPRESSED_BY_AKT1_UP                                 | -1.02 | 0.33 | 0 | 0 | 0 | not significant |
| 3608 | GO_CARBOXYL_REDUCTASE_NADPH_ACTIVITY                                | -1.02 | 0.32 | 0 | 0 | 0 | not significant |
| 3609 | GO_EGO_COMPLEX                                                      | -1.02 | 0.32 | 0 | 0 | 0 | not significant |
| 3610 | GO_POSTSYNAPTIC_ENDOCYTIC_ZONE                                      | -1.02 | 0.32 | 0 | 0 | 0 | not significant |
| 3611 | GO_PYRAMIDAL_NEURON_DIFFERENTIATION                                 | -1.02 | 0.32 | 0 | 0 | 0 | not significant |
| 3612 | GO_REGULATION_OF_METAPHASE_PLATE_CONGRESSION                        | -1.02 | 0.32 | 0 | 0 | 0 | not significant |
| 3613 | GO_SUBSTRATE_DEPENDENT_CELL_MIGRATION_CELL_EXTENSION                | -1.02 | 0.32 | 0 | 0 | 0 | not significant |
| 3614 | GO_RRNA_TRANSPORT                                                   | -1.02 | 0.3  | 0 | 0 | 0 | not significant |
| 3615 | LIU_SOX4_TARGETS_DN                                                 | -1.01 | 0.43 | 0 | 0 | 0 | not significant |
| 3616 | CHR17P13                                                            | -1.01 | 0.41 | 0 | 0 | 0 | not significant |
| 3617 | CHR10Q22                                                            | -1.01 | 0.4  | 0 | 0 | 0 | not significant |
| 3618 | GO_ACTIN_FILAMENT_BUNDLE_ORGANIZATION                               | -1.01 | 0.4  | 0 | 0 | 0 | not significant |
| 3619 | MORI_EMU_MYC_LYMPHOMA_BY_ONSET_TIME_UP                              | -1.01 | 0.4  | 0 | 0 | 0 | not significant |
| 3620 | CHR3P25                                                             | -1.01 | 0.39 | 0 | 0 | 0 | not significant |
| 3621 | GO_MULTICELLULAR_ORGANISMAL_SIGNALING                               | -1.01 | 0.39 | 0 | 0 | 0 | not significant |
| 3622 | REACTOME_SYNTHESIS_OF_PA                                            | -1.01 | 0.39 | 0 | 0 | 0 | not significant |
| 3623 | REACTOME_TP53_REGULATES_METABOLIC_GENES                             | -1.01 | 0.39 | 0 | 0 | 0 | not significant |
| 3624 | BROWNE_HCMV_INFECTION_1HR_DN                                        | -1.01 | 0.38 | 0 | 0 | 0 | not significant |
| 3625 | GO_REGULATION_OF_HISTONE_PHOSPHORYLATION                            | -1.01 | 0.38 | 0 | 0 | 0 | not significant |
| 3626 | GO_RESPIRATORY_SYSTEM_PROCESS                                       | -1.01 | 0.38 | 0 | 0 | 0 | not significant |
| 3627 | GO_RESPONSE_TO_OSMOTIC_STRESS                                       | -1.01 | 0.38 | 0 | 0 | 0 | not significant |
| 3628 | IVANOVSKA_MIR106B_TARGETS                                           | -1.01 | 0.38 | 0 | 0 | 0 | not significant |
| 3629 | MCCLUNG_CREB1_TARGETS_DN                                            | -1.01 | 0.38 | 0 | 0 | 0 | not significant |
| 3630 | SHETH_LIVER_CANCER_VS_TXNP_LOSS_PAM2                                | -1.01 | 0.38 | 0 | 0 | 0 | not significant |
| 3631 | BROWNE_HCMV_INFECTION_6HR_DN                                        | -1.01 | 0.37 | 0 | 0 | 0 | not significant |
| 3632 | GO_INCLUSION_BODY                                                   | -1.01 | 0.37 | 0 | 0 | 0 | not significant |
| 3633 | GO_LONG_TERM_MEMORY                                                 | -1.01 | 0.37 | 0 | 0 | 0 | not significant |
| 3634 | GO_MUSCLE_CELL_MIGRATION                                            | -1.01 | 0.37 | 0 | 0 | 0 | not significant |
| 3635 | GO_NEGATIVE_REGULATION_OF_CELLULAR_SENESCENCE                       | -1.01 | 0.37 | 0 | 0 | 0 | not significant |
| 3636 | GO_NEURAL_PRECURSOR_CELL_PROLIFERATION                              | -1.01 | 0.37 | 0 | 0 | 0 | not significant |
| 3637 | GO_POSITIVE_REGULATION_OF_MRNA_CATABOLIC_PROCESS                    | -1.01 | 0.37 | 0 | 0 | 0 | not significant |
| 3638 | GO_REGULATION_OF_CELLULAR_RESPONSE_TO_INSULIN_STIMULUS              | -1.01 | 0.37 | 0 | 0 | 0 | not significant |
| 3639 | MELLMAN_TUT1_TARGETS_UP                                             | -1.01 | 0.37 | 0 | 0 | 0 | not significant |
| 3640 | PID_CERAMIDE_PATHWAY                                                | -1.01 | 0.37 | 0 | 0 | 0 | not significant |
| 3641 | REACTOME_TRAF6_MEDIATED_IRF7_ACTIVATION_IN_TLR7_8_OR_9_SIGNALING    | -1.01 | 0.37 | 0 | 0 | 0 | not significant |
| 3642 | BIOCARTA_FAS_PATHWAY                                                | -1.01 | 0.36 | 0 | 0 | 0 | not significant |
| 3643 | GO_EMBRYONIC_AXIS_SPECIFICATION                                     | -1.01 | 0.36 | 0 | 0 | 0 | not significant |
| 3644 | GO_INTRACILIARY_RETROGRADE_TRANSPORT                                | -1.01 | 0.36 | 0 | 0 | 0 | not significant |
| 3645 | GO_NON_RECOMBINATIONAL_REPAIR                                       | -1.01 | 0.36 | 0 | 0 | 0 | not significant |
| 3646 | GO_REGULATION_OF_HISTONE_H4_ACETYLATION                             | -1.01 | 0.36 | 0 | 0 | 0 | not significant |
| 3647 | GO_RENAL_WATER_HOMEOSTASIS                                          | -1.01 | 0.36 | 0 | 0 | 0 | not significant |
| 3648 | GO_STRIATED_MUSCLE_ADAPTATION                                       | -1.01 | 0.36 | 0 | 0 | 0 | not significant |
| 3649 | GO_TRANSCRIPTION_COREPRESSOR_ACTIVITY                               | -1.01 | 0.36 | 0 | 0 | 0 | not significant |
| 3650 | LOPEZ_TRANSLATION_VIA_FN1_SIGNALING                                 | -1.01 | 0.36 | 0 | 0 | 0 | not significant |
| 3651 | PID_P38_MK2_PATHWAY                                                 | -1.01 | 0.36 | 0 | 0 | 0 | not significant |
| 3652 | REACTOME_INTEGRIN_SIGNALING                                         | -1.01 | 0.36 | 0 | 0 | 0 | not significant |
| 3653 | SWEET_KRAS_TARGETS_UP                                               | -1.01 | 0.36 | 0 | 0 | 0 | not significant |
| 3654 | ZHOU_CELL_CYCLE_GENES_IN_IR_RESPONSE_6HR                            | -1.01 | 0.36 | 0 | 0 | 0 | not significant |
| 3655 | BERNARD_PPAPDC1B_TARGETS_UP                                         | -1.01 | 0.35 | 0 | 0 | 0 | not significant |
| 3656 | GO_AP_3_ADAPTOR_COMPLEX                                             | -1.01 | 0.35 | 0 | 0 | 0 | not significant |
| 3657 | GO_ENDORIBONUCLEASE_ACTIVITY                                        | -1.01 | 0.35 | 0 | 0 | 0 | not significant |
| 3658 | GO_MICROTUBULE_DEPOLYMERIZATION                                     | -1.01 | 0.35 | 0 | 0 | 0 | not significant |
| 3659 | GO_RESPONSE_TO_HYPEROXIA                                            | -1.01 | 0.35 | 0 | 0 | 0 | not significant |
| 3660 | GO_SEGMENTATION                                                     | -1.01 | 0.35 | 0 | 0 | 0 | not significant |
| 3661 | KEGG_RNA_DEGRADATION                                                | -1.01 | 0.35 | 0 | 0 | 0 | not significant |
| 3662 | MASSARWEH_RESPONSE_TO_ESTRADIOL                                     | -1.01 | 0.35 | 0 | 0 | 0 | not significant |
| 3663 | BIOCARTA_MYOSIN_PATHWAY                                             | -1.01 | 0.34 | 0 | 0 | 0 | not significant |
| 3664 | BIOCARTA_SET_PATHWAY                                                | -1.01 | 0.34 | 0 | 0 | 0 | not significant |
| 3665 | GO_CERAMIDE_CATABOLIC_PROCESS                                       | -1.01 | 0.34 | 0 | 0 | 0 | not significant |
| 3666 | GO_DETECTION_OF_CALCIUM_ION                                         | -1.01 | 0.34 | 0 | 0 | 0 | not significant |
| 3667 | GO_FOLIC_ACID_CONTAINING_COMPOUND_BIOSYNTHETIC_PROCESS              | -1.01 | 0.34 | 0 | 0 | 0 | not significant |
| 3668 | GO_NUCLEAR_LAMINA                                                   | -1.01 | 0.34 | 0 | 0 | 0 | not significant |
| 3669 | GO_POST_EMBRYONIC_ANIMAL_ORGAN_DEVELOPMENT                          | -1.01 | 0.34 | 0 | 0 | 0 | not significant |
| 3670 | KANG_DOXORUBICIN_RESISTANCE_DN                                      | -1.01 | 0.34 | 0 | 0 | 0 | not significant |
| 3671 | ZHENG_RESPONSE_TO_ARSENITE_UP                                       | -1.01 | 0.34 | 0 | 0 | 0 | not significant |
| 3672 | FIGUEROA_AML_METHYLATION_CLUSTER_4_DN                               | -1.01 | 0.33 | 0 | 0 | 0 | not significant |
| 3673 | NGO_MALIGNANT_GLIOMA_1P_LOH                                         | -1.01 | 0.33 | 0 | 0 | 0 | not significant |
| 3674 | REACTOME_ADRENALINE_NORADRENALINE_INHIBITS_INSULIN_SECRETION        | -1.01 | 0.33 | 0 | 0 | 0 | not significant |
| 3675 | WU_HBX_TARGETS_3_DN                                                 | -1.01 | 0.33 | 0 | 0 | 0 | not significant |
| 3676 | GO_CYCLIC_NUCLEOTIDE_DEPENDENT_PROTEIN_KINASE_ACTIVITY              | -1.01 | 0.32 | 0 | 0 | 0 | not significant |
| 3677 | GO_MICRO_RIBONUCLEOPROTEIN_COMPLEX                                  | -1.01 | 0.32 | 0 | 0 | 0 | not significant |
| 3678 | GO_MUSCLE_MYOSIN_COMPLEX                                            | -1.01 | 0.32 | 0 | 0 | 0 | not significant |
| 3679 | GO_NADH_PYROPHOSPHATASE_ACTIVITY                                    | -1.01 | 0.32 | 0 | 0 | 0 | not significant |
| 3680 | GO_NEDD8_TRANSFERASE_ACTIVITY                                       | -1.01 | 0.32 | 0 | 0 | 0 | not significant |
| 3681 | GO_POSITIVE_REGULATION_OF_VASCULAR_ASSOCIATED_SMOOTH_MUSCLE_CELI    | -1.01 | 0.32 | 0 | 0 | 0 | not significant |
| 3682 | GO_FLOTILLIN_COMPLEX                                                | -1.01 | 0.31 | 0 | 0 | 0 | not significant |
| 3683 | GO_PLATELET_DENSE_TUBULAR_NETWORK_MEMBRANE                          | -1.01 | 0.31 | 0 | 0 | 0 | not significant |
| 3684 | GO_POLY_A_PLUS_MRNA_EXPORT_FROM_NUCLEUS                             | -1.01 | 0.31 | 0 | 0 | 0 | not significant |
| 3685 | GO_SPHINGOMYELIN_CATABOLIC_PROCESS                                  | -1.01 | 0.31 | 0 | 0 | 0 | not significant |
| 3686 | GO_SUMO_POLYMER_BINDING                                             | -1.01 | 0.3  | 0 | 0 | 0 | not significant |
| 3687 | REACTOME_UPTAKE_AND_FUNCTION_OF_DIPHTHERIA_TOXIN                    | -1.01 | 0.29 | 0 | 0 | 0 | not significant |
| 3688 | HEDENFALK_BREAST_CANCER_BRCA1_VS_BRCA2                              | -1.00 | 0.4  | 0 | 0 | 0 | not significant |
| 3689 | MACAEVA_PBMC_RESPONSE_TO_IR                                         | -1.00 | 0.39 | 0 | 0 | 0 | not significant |
| 3690 | CHR10Q23                                                            | -1.00 | 0.38 | 0 | 0 | 0 | not significant |
| 3691 | GO_NEGATIVE_REGULATION_OF_APOPTOTIC_SIGNALING_PATHWAY               | -1.00 | 0.38 | 0 | 0 | 0 | not significant |
| 3692 | GO_SWI_SNF_SUPERFAMILY_TYPE_COMPLEX                                 | -1.00 | 0.38 | 0 | 0 | 0 | not significant |
| 3693 | GO_INTERFERON_BETA_PRODUCTION                                       | -1.00 | 0.37 | 0 | 0 | 0 | not significant |
| 3694 | GO_INTRINSIC_APOPTOTIC_SIGNALING_PATHWAY_IN_RESPONSE_TO_OXIDATIVE_S | -1.00 | 0.37 | 0 | 0 | 0 | not significant |

|      |                                                                    |       |      |   |   |   |                 |
|------|--------------------------------------------------------------------|-------|------|---|---|---|-----------------|
| 3695 | GO_POSITIVE_REGULATION_OF_DNA_METABOLIC_PROCESS                    | -1.00 | 0.37 | 0 | 0 | 0 | not significant |
| 3696 | GO_REGULATION_OF_CELL_JUNCTION_ASSEMBLY                            | -1.00 | 0.37 | 0 | 0 | 0 | not significant |
| 3697 | GO_REGULATION_OF_NITRIC_OXIDE_SYNTHASE_ACTIVITY                    | -1.00 | 0.37 | 0 | 0 | 0 | not significant |
| 3698 | GO_RESPONSE_TO_INTERLEUKIN_12                                      | -1.00 | 0.37 | 0 | 0 | 0 | not significant |
| 3699 | YAUCH_HEDGEHOG_SIGNALING_PARACRINE_DN                              | -1.00 | 0.37 | 0 | 0 | 0 | not significant |
| 3700 | DARWICHE_SKIN_TUMOR_PROMOTER_UP                                    | -1.00 | 0.36 | 0 | 0 | 0 | not significant |
| 3701 | GO_ACTIN_FILAMENT_BUNDLE                                           | -1.00 | 0.36 | 0 | 0 | 0 | not significant |
| 3702 | GO_ANDROGEN_RECEPTOR_SIGNALING_PATHWAY                             | -1.00 | 0.36 | 0 | 0 | 0 | not significant |
| 3703 | GO_METHYLTRANSFERASE_COMPLEX                                       | -1.00 | 0.36 | 0 | 0 | 0 | not significant |
| 3704 | GO_MICROTUBULE_ORGANIZING_CENTER_PART                              | -1.00 | 0.36 | 0 | 0 | 0 | not significant |
| 3705 | GO_POSITIVE_REGULATION_OF_MICROTUBULE_POLYMERIZATION_OR_DEPOLYME   | -1.00 | 0.36 | 0 | 0 | 0 | not significant |
| 3706 | GO_POSTSYNAPTIC_SPECIALIZATION_MEMBRANE                            | -1.00 | 0.36 | 0 | 0 | 0 | not significant |
| 3707 | GO_REGULATION_OF_ATPASE_ACTIVITY                                   | -1.00 | 0.36 | 0 | 0 | 0 | not significant |
| 3708 | GO_REGULATION_OF_CELL_SUBSTRATE_ADHESION                           | -1.00 | 0.36 | 0 | 0 | 0 | not significant |
| 3709 | REACTOME_ACTIVATION_OF_BH3_ONLY_PROTEINS                           | -1.00 | 0.36 | 0 | 0 | 0 | not significant |
| 3710 | GO_CELL_FATE_COMMITMENT                                            | -1.00 | 0.35 | 0 | 0 | 0 | not significant |
| 3711 | GO_CHAPERONE_BINDING                                               | -1.00 | 0.35 | 0 | 0 | 0 | not significant |
| 3712 | GO_GLYCOSYL_COMPOUND_BIOSYNTHETIC_PROCESS                          | -1.00 | 0.35 | 0 | 0 | 0 | not significant |
| 3713 | GO_GOLGI_TO_PLASMA_MEMBRANE_TRANSPORT                              | -1.00 | 0.35 | 0 | 0 | 0 | not significant |
| 3714 | GO_POSITIVE_REGULATION_OF_NEUROLOGICAL_SYSTEM_PROCESS              | -1.00 | 0.35 | 0 | 0 | 0 | not significant |
| 3715 | PID_FAK_PATHWAY                                                    | -1.00 | 0.35 | 0 | 0 | 0 | not significant |
| 3716 | REACTOME_CYTOCHROME_C_MEDIATED_APOPTOTIC_RESPONSE                  | -1.00 | 0.35 | 0 | 0 | 0 | not significant |
| 3717 | REACTOME_THE_CITRIC_ACID_TCA_CYCLE_AND_RESPIRATORY_ELECTRON_TRA    | -1.00 | 0.35 | 0 | 0 | 0 | not significant |
| 3718 | DEMAGALHAES_AGING_DN                                               | -1.00 | 0.34 | 0 | 0 | 0 | not significant |
| 3719 | GO_ANOIKIS                                                         | -1.00 | 0.34 | 0 | 0 | 0 | not significant |
| 3720 | GO_CYTOPLASMIC_MRNA_PROCESSING_BODY_ASSEMBLY                       | -1.00 | 0.34 | 0 | 0 | 0 | not significant |
| 3721 | GO_FIBROBLAST_APOPTOTIC_PROCESS                                    | -1.00 | 0.34 | 0 | 0 | 0 | not significant |
| 3722 | GO_GLYCOLIPID_CATABOLIC_PROCESS                                    | -1.00 | 0.34 | 0 | 0 | 0 | not significant |
| 3723 | GO_NEGATIVE_REGULATION_OF_DNA_BIOSYNTHETIC_PROCESS                 | -1.00 | 0.34 | 0 | 0 | 0 | not significant |
| 3724 | GO_PHOSPHORIC_ESTER_HYDROLASE_ACTIVITY                             | -1.00 | 0.34 | 0 | 0 | 0 | not significant |
| 3725 | GO_REGULATION_OF_EMBRYONIC_DEVELOPMENT                             | -1.00 | 0.34 | 0 | 0 | 0 | not significant |
| 3726 | OZEN_MIR125B1_TARGETS                                              | -1.00 | 0.34 | 0 | 0 | 0 | not significant |
| 3727 | RAY_TARGETS_OF_P210_BCR_ABL_FUSION_UP                              | -1.00 | 0.34 | 0 | 0 | 0 | not significant |
| 3728 | UDAYAKUMAR_MED1_TARGETS_UP                                         | -1.00 | 0.34 | 0 | 0 | 0 | not significant |
| 3729 | BCAT_100_UP.V1_UP                                                  | -1.00 | 0.33 | 0 | 0 | 0 | not significant |
| 3730 | CHR12Q15                                                           | -1.00 | 0.33 | 0 | 0 | 0 | not significant |
| 3731 | CHR17Q24                                                           | -1.00 | 0.33 | 0 | 0 | 0 | not significant |
| 3732 | GO_CARNITINE_SHUTTLE                                               | -1.00 | 0.33 | 0 | 0 | 0 | not significant |
| 3733 | GO_CYCLIN_CDK_POSITIVE_TRANSCRIPTION_ELONGATION_FACTOR_COMPLEX     | -1.00 | 0.33 | 0 | 0 | 0 | not significant |
| 3734 | GO_NEGATIVE_REGULATION_OF_INTRACELLULAR_STEROID_HORMONE_RECEPTO    | -1.00 | 0.33 | 0 | 0 | 0 | not significant |
| 3735 | GO_NUCLEAR_ENVELOPE_REASSEMBLY                                     | -1.00 | 0.33 | 0 | 0 | 0 | not significant |
| 3736 | GO_ORGANELLE_ENVELOPE_LUMEN                                        | -1.00 | 0.33 | 0 | 0 | 0 | not significant |
| 3737 | GO_PEPTIDYL_METHIONINE_MODIFICATION                                | -1.00 | 0.33 | 0 | 0 | 0 | not significant |
| 3738 | GO_PHOSPHATASE_ACTIVATOR_ACTIVITY                                  | -1.00 | 0.33 | 0 | 0 | 0 | not significant |
| 3739 | GO_REGULATION_OF_SMAD_PROTEIN_SIGNAL_TRANSDUCTION                  | -1.00 | 0.33 | 0 | 0 | 0 | not significant |
| 3740 | GO_SYNAPTIC_VESICLE_CYTOSKELETAL_TRANSPORT                         | -1.00 | 0.33 | 0 | 0 | 0 | not significant |
| 3741 | GO_T_CELL_HOMEOSTASIS                                              | -1.00 | 0.33 | 0 | 0 | 0 | not significant |
| 3742 | HOFMANN_CELL_LYMPHOMA_DN                                           | -1.00 | 0.33 | 0 | 0 | 0 | not significant |
| 3743 | PID_DNA_PK_PATHWAY                                                 | -1.00 | 0.33 | 0 | 0 | 0 | not significant |
| 3744 | REACTOME_CENTROSOME_MATURATION                                     | -1.00 | 0.33 | 0 | 0 | 0 | not significant |
| 3745 | REACTOME_SYNTHESIS_OF_PROSTAGLANDINS_PG_AND_THROMBOXANES_TX        | -1.00 | 0.33 | 0 | 0 | 0 | not significant |
| 3746 | BIOCARTA_CPSF_PATHWAY                                              | -1.00 | 0.32 | 0 | 0 | 0 | not significant |
| 3747 | CHR20Q12                                                           | -1.00 | 0.32 | 0 | 0 | 0 | not significant |
| 3748 | GO_EPIDERMAL_GROWTH_FACTOR_RECEPTOR_BINDING                        | -1.00 | 0.32 | 0 | 0 | 0 | not significant |
| 3749 | GO_FMN_BINDING                                                     | -1.00 | 0.32 | 0 | 0 | 0 | not significant |
| 3750 | GO_FORMATION_OF_TRANSLATION_PREINITIATION_COMPLEX                  | -1.00 | 0.32 | 0 | 0 | 0 | not significant |
| 3751 | GO_MITOCHONDRIAL_RESPIRATORY_CHAIN_COMPLEX_ASSEMBLY                | -1.00 | 0.32 | 0 | 0 | 0 | not significant |
| 3752 | GO_REGULATION_OF_AUTOPHAGOSOME_MATURATION                          | -1.00 | 0.32 | 0 | 0 | 0 | not significant |
| 3753 | MARIADASON_RESPONSE_TO_CURCUMIN_SULINDAC_5                         | -1.00 | 0.32 | 0 | 0 | 0 | not significant |
| 3754 | REACTOME_CLATHRIN_MEDIATED_ENDOCYTOSIS                             | -1.00 | 0.32 | 0 | 0 | 0 | not significant |
| 3755 | BIOCARTA_PELP1_PATHWAY                                             | -1.00 | 0.31 | 0 | 0 | 0 | not significant |
| 3756 | GO_ESTABLISHMENT_OF_LYMPHOCYTE_POLARITY                            | -1.00 | 0.31 | 0 | 0 | 0 | not significant |
| 3757 | GO_MUSCLE_CELL_DIFFERENTIATION                                     | -1.00 | 0.31 | 0 | 0 | 0 | not significant |
| 3758 | GO_THYROID_GLAND_DEVELOPMENT                                       | -1.00 | 0.31 | 0 | 0 | 0 | not significant |
| 3759 | GO_SHELTERIN_COMPLEX                                               | -1.00 | 0.3  | 0 | 0 | 0 | not significant |
| 3760 | GO_TRNA_AMINOACYLATION_FOR_MITOCHONDRIAL_PROTEIN_TRANSLATION       | -1.00 | 0.3  | 0 | 0 | 0 | not significant |
| 3761 | GO_NEGATIVE_REGULATION_OF_SMOOTH_MUSCLE_CONTRACTION                | -1.00 | 0.29 | 0 | 0 | 0 | not significant |
| 3762 | GO_PLATELET_DENSE_GRANULE_MEMBRANE                                 | -1.00 | 0.29 | 0 | 0 | 0 | not significant |
| 3763 | BIOCARTA_AKT_PATHWAY                                               | -0.99 | 0.36 | 0 | 0 | 0 | not significant |
| 3764 | GO_NEGATIVE_REGULATION_OF_CELL_CYCLE_ARREST                        | -0.99 | 0.35 | 0 | 0 | 0 | not significant |
| 3765 | BURTON_ADIPOGENESIS_PEAK_AT_8HR                                    | -0.99 | 0.34 | 0 | 0 | 0 | not significant |
| 3766 | BYSTRYKH_HEMATOPOIESIS_STEM_CELL_AND_BRAIN_QTL_CIS                 | -0.99 | 0.34 | 0 | 0 | 0 | not significant |
| 3767 | GO_MITOCHONDRIAL_RESPIRATORY_CHAIN_COMPLEX_IV_ASSEMBLY             | -0.99 | 0.34 | 0 | 0 | 0 | not significant |
| 3768 | GO_PEPTIDASE_REGULATOR_ACTIVITY                                    | -0.99 | 0.34 | 0 | 0 | 0 | not significant |
| 3769 | GO_PROTEIN_LOCALIZATION_TO_PLASMA_MEMBRANE                         | -0.99 | 0.34 | 0 | 0 | 0 | not significant |
| 3770 | GO_SOMATIC_STEM_CELL_DIVISION                                      | -0.99 | 0.34 | 0 | 0 | 0 | not significant |
| 3771 | PID_MTOR_4PATHWAY                                                  | -0.99 | 0.34 | 0 | 0 | 0 | not significant |
| 3772 | PID_TGFB_PATHWAY                                                   | -0.99 | 0.34 | 0 | 0 | 0 | not significant |
| 3773 | REACTOME_FORMATION_OF_THE_BETA_CATENIN/TCF_TRANSCRIPTIVATING_COMPL | -0.99 | 0.34 | 0 | 0 | 0 | not significant |
| 3774 | CHR10P13                                                           | -0.99 | 0.33 | 0 | 0 | 0 | not significant |
| 3775 | CYCLIN_D1_UP.V1_UP                                                 | -0.99 | 0.33 | 0 | 0 | 0 | not significant |
| 3776 | GO_CARDIAC_CHAMBER_DEVELOPMENT                                     | -0.99 | 0.33 | 0 | 0 | 0 | not significant |
| 3777 | GO_CILIARY_BASAL_BODY_PLASMA_MEMBRANE_DOCKING                      | -0.99 | 0.33 | 0 | 0 | 0 | not significant |
| 3778 | GO_DEVELOPMENTAL_MATURATION                                        | -0.99 | 0.33 | 0 | 0 | 0 | not significant |
| 3779 | GO_FERROUS_IRON_BINDING                                            | -0.99 | 0.33 | 0 | 0 | 0 | not significant |
| 3780 | GO_P_BODY                                                          | -0.99 | 0.33 | 0 | 0 | 0 | not significant |
| 3781 | GO_PROTEIN_KINASE_C_ACTIVITY                                       | -0.99 | 0.33 | 0 | 0 | 0 | not significant |
| 3782 | GO_REGULATION_OF_BROWN_FAT_CELL_DIFFERENTIATION                    | -0.99 | 0.33 | 0 | 0 | 0 | not significant |
| 3783 | GO_REGULATION_OF_CALCINIUM_MEDIATED_SIGNALING                      | -0.99 | 0.33 | 0 | 0 | 0 | not significant |
| 3784 | GO_TRANS_GOLGI_NETWORK_MEMBRANE                                    | -0.99 | 0.33 | 0 | 0 | 0 | not significant |
| 3785 | HOEGERKORP_CD44_TARGETS_DIRECT_DN                                  | -0.99 | 0.33 | 0 | 0 | 0 | not significant |
| 3786 | MAGRANGEAS_MULTIPLE_MYELOMA_IGG_VS_IQA_DN                          | -0.99 | 0.33 | 0 | 0 | 0 | not significant |
| 3787 | REACTOME_IRS_MEDIATED_SIGNALING                                    | -0.99 | 0.33 | 0 | 0 | 0 | not significant |
| 3788 | GO_GOLGI_VESICLE_BUDDING                                           | -0.99 | 0.32 | 0 | 0 | 0 | not significant |
| 3789 | GO_HEART_PROCESS                                                   | -0.99 | 0.32 | 0 | 0 | 0 | not significant |
| 3790 | GO_POSTSYNAPTIC_NEUROTRANSMITTER_RECEPTOR_INTERNALIZATION          | -0.99 | 0.32 | 0 | 0 | 0 | not significant |
| 3791 | GO_SUPEROXIDE_ANION_GENERATION                                     | -0.99 | 0.32 | 0 | 0 | 0 | not significant |
| 3792 | GO_UBIQUITIN_LIKE_PROTEIN_CONJUGATING_ENZYME_BINDING               | -0.99 | 0.32 | 0 | 0 | 0 | not significant |
| 3793 | HANN_RESISTANCE_TO_BCL2_INHIBITOR_UP                               | -0.99 | 0.32 | 0 | 0 | 0 | not significant |
| 3794 | REACTOME_ASPARAGINE_N_LINKED_GLYCOSYLATION                         | -0.99 | 0.32 | 0 | 0 | 0 | not significant |
| 3795 | REACTOME_DOWNREGULATION_OF_ERBB4_SIGNALING                         | -0.99 | 0.32 | 0 | 0 | 0 | not significant |
| 3796 | SU_LIVER                                                           | -0.99 | 0.32 | 0 | 0 | 0 | not significant |
| 3797 | DACOSTA_UV_RESPONSE_VIA_ERCC3_TTD_UP                               | -0.99 | 0.31 | 0 | 0 | 0 | not significant |
| 3798 | GO_CARDIAC_MYOFIBRIL_ASSEMBLY                                      | -0.99 | 0.31 | 0 | 0 | 0 | not significant |
| 3799 | GO_REGULATION_OF_PEPTIDASE_ACTIVITY                                | -0.99 | 0.31 | 0 | 0 | 0 | not significant |
| 3800 | GO_REGULATION_OF_PROTEIN_HOMODIMERIZATION_ACTIVITY                 | -0.99 | 0.31 | 0 | 0 | 0 | not significant |
| 3801 | GO_RETINAL_LAYER_FORMATION                                         | -0.99 | 0.31 | 0 | 0 | 0 | not significant |
| 3802 | GO_SMALL_GTPASE_BINDING                                            | -0.99 | 0.31 | 0 | 0 | 0 | not significant |
| 3803 | REACTOME_INOSITOL_PHOSPHATE_METABOLISM                             | -0.99 | 0.31 | 0 | 0 | 0 | not significant |

|      |                                                                   |       |      |   |   |   |                 |
|------|-------------------------------------------------------------------|-------|------|---|---|---|-----------------|
| 3804 | GO_IRON_ION_TRANSMEMBRANE_TRANSPORTER_ACTIVITY                    | -0.99 | 0.3  | 0 | 0 | 0 | not significant |
| 3805 | GO_POSITIVE_REGULATION_OF_MONOOXYGENASE_ACTIVITY                  | -0.99 | 0.3  | 0 | 0 | 0 | not significant |
| 3806 | GO_REGULATION_OF_KERATINOCYTE_DIFFERENTIATION                     | -0.99 | 0.3  | 0 | 0 | 0 | not significant |
| 3807 | GO_REGULATION_OF_PROTEIN_LOCALIZATION_TO_CENTROSOME               | -0.99 | 0.3  | 0 | 0 | 0 | not significant |
| 3808 | GO_REGULATION_OF_VASCULOGENESIS                                   | -0.99 | 0.3  | 0 | 0 | 0 | not significant |
| 3809 | GO_INTRAMOLECULAR_OXIDOREDUCTASE_ACTIVITY_INTERCONVERTING_ALDOSE  | -0.99 | 0.29 | 0 | 0 | 0 | not significant |
| 3810 | GO_NEGATIVE_REGULATION_OF_PHOSPHATIDYLINOSITOL_3_KINASE_SIGNALING | -0.99 | 0.29 | 0 | 0 | 0 | not significant |
| 3811 | GO_PEPTIDYL_LYSINE_MODIFICATION                                   | -0.99 | 0.29 | 0 | 0 | 0 | not significant |
| 3812 | GO_PHOTORECEPTOR_DISC_MEMBRANE                                    | -0.99 | 0.29 | 0 | 0 | 0 | not significant |
| 3813 | GO_UTP_BIOSYNTHETIC_PROCESS                                       | -0.99 | 0.29 | 0 | 0 | 0 | not significant |
| 3814 | GO_CYCLIC_NUCLEOTIDE_BIOSYNTHETIC_PROCESS                         | -0.99 | 0.28 | 0 | 0 | 0 | not significant |
| 3815 | GO_HISTONE_H2A_K63_LINKED_UBIQUITINATION                          | -0.99 | 0.28 | 0 | 0 | 0 | not significant |
| 3816 | GO_REGULATION_OF_CYCLIC_NUCLEOTIDE_PHOSPHODIESTERASE_ACTIVITY     | -0.99 | 0.28 | 0 | 0 | 0 | not significant |
| 3817 | GO_LSM1_7_PAT1_COMPLEX                                            | -0.99 | 0.27 | 0 | 0 | 0 | not significant |
| 3818 | GO_GLOBAL_GENOME_NUCLEOTIDE_EXCISION_REPAIR                       | -0.98 | 0.34 | 0 | 0 | 0 | not significant |
| 3819 | GO_REGULATION_OF_MUSCLE_SYSTEM_PROCESS                            | -0.98 | 0.34 | 0 | 0 | 0 | not significant |
| 3820 | CHR16Q22                                                          | -0.98 | 0.33 | 0 | 0 | 0 | not significant |
| 3821 | GO_CERAMIDE_BINDING                                               | -0.98 | 0.33 | 0 | 0 | 0 | not significant |
| 3822 | GO_N_METHYLTRANSFERASE_ACTIVITY                                   | -0.98 | 0.33 | 0 | 0 | 0 | not significant |
| 3823 | GO_POSITIVE_REGULATION_OF_SMOOTH_MUSCLE_CELL_MIGRATION            | -0.98 | 0.33 | 0 | 0 | 0 | not significant |
| 3824 | GO_REGULATION_OF_NUCLEASE_ACTIVITY                                | -0.98 | 0.33 | 0 | 0 | 0 | not significant |
| 3825 | RIZKI_TUMOR_INVASIVENESS_3D_UP                                    | -0.98 | 0.33 | 0 | 0 | 0 | not significant |
| 3826 | SMIRNOV_RESPONSE_TO_IR_6HR_UP                                     | -0.98 | 0.33 | 0 | 0 | 0 | not significant |
| 3827 | BIOCARTA_AGR_PATHWAY                                              | -0.98 | 0.32 | 0 | 0 | 0 | not significant |
| 3828 | BIOCARTA_CALCINEURIN_PATHWAY                                      | -0.98 | 0.32 | 0 | 0 | 0 | not significant |
| 3829 | CHOI_ATL_CHRONIC_VS_ACUTE_DN                                      | -0.98 | 0.32 | 0 | 0 | 0 | not significant |
| 3830 | CHR9P21                                                           | -0.98 | 0.32 | 0 | 0 | 0 | not significant |
| 3831 | FIGUEROA_AML_METHYLATION_CLUSTER_2_UP                             | -0.98 | 0.32 | 0 | 0 | 0 | not significant |
| 3832 | GO_BASE_EXCISION_REPAIR_AP_SITE_FORMATION                         | -0.98 | 0.32 | 0 | 0 | 0 | not significant |
| 3833 | GO_CARDIAC_CELL_DEVELOPMENT                                       | -0.98 | 0.32 | 0 | 0 | 0 | not significant |
| 3834 | GO_COATED_MEMBRANE                                                | -0.98 | 0.32 | 0 | 0 | 0 | not significant |
| 3835 | GO_PHOSPHATIDYLINOSITOL_3_5_BISPHOSPHATE_PHOSPHATASE_ACTIVITY     | -0.98 | 0.32 | 0 | 0 | 0 | not significant |
| 3836 | GO_PHOSPHATIDYLINOSITOL_3_KINASE_BINDING                          | -0.98 | 0.32 | 0 | 0 | 0 | not significant |
| 3837 | GO_POSITIVE_REGULATION_OF_CALCIIUM_ION_TRANSMEMBRANE_TRANSPORTER  | -0.98 | 0.32 | 0 | 0 | 0 | not significant |
| 3838 | GO_PRE_MIRNA_PROCESSING                                           | -0.98 | 0.32 | 0 | 0 | 0 | not significant |
| 3839 | GO_REGULATION_OF_CELL_MATRIX_ADHESION                             | -0.98 | 0.32 | 0 | 0 | 0 | not significant |
| 3840 | GO_REGULATION_OF_ER_TO_GOLGI_VESICLE_MEDIATED_TRANSPORT           | -0.98 | 0.32 | 0 | 0 | 0 | not significant |
| 3841 | GO_REGULATION_OF_MEMBRANE_DEPOLARIZATION                          | -0.98 | 0.32 | 0 | 0 | 0 | not significant |
| 3842 | MULLIGHAN_NPM1_MUTATED_SIGNATURE_2_UP                             | -0.98 | 0.32 | 0 | 0 | 0 | not significant |
| 3843 | REACTOME_SHC1_EVENTS_IN_ERBB2_SIGNALING                           | -0.98 | 0.32 | 0 | 0 | 0 | not significant |
| 3844 | WALLACE_PROSTATE_CANCER_UP                                        | -0.98 | 0.32 | 0 | 0 | 0 | not significant |
| 3845 | GO_PIGMENT_GRANULE_MATURATION                                     | -0.98 | 0.31 | 0 | 0 | 0 | not significant |
| 3846 | GO_POSITIVE_REGULATION_OF_VASCULOGENESIS                          | -0.98 | 0.31 | 0 | 0 | 0 | not significant |
| 3847 | GO_REGULATION_OF_CELL_PROJECTION_ASSEMBLY                         | -0.98 | 0.31 | 0 | 0 | 0 | not significant |
| 3848 | OUYANG_PROSTATE_CANCER_PROGRESSION_DN                             | -0.98 | 0.31 | 0 | 0 | 0 | not significant |
| 3849 | REACTOME_SIGNALING_TO_ERKS                                        | -0.98 | 0.31 | 0 | 0 | 0 | not significant |
| 3850 | GO_CORONARY_ARTERY_MORPHOGENESIS                                  | -0.98 | 0.3  | 0 | 0 | 0 | not significant |
| 3851 | GO_DEAMINASE_ACTIVITY                                             | -0.98 | 0.3  | 0 | 0 | 0 | not significant |
| 3852 | GO_IMMUNOLOGICAL_SYNAPSE_FORMATION                                | -0.98 | 0.3  | 0 | 0 | 0 | not significant |
| 3853 | GO_LAYER_FORMATION_IN_CEREBRAL_CORTEX                             | -0.98 | 0.3  | 0 | 0 | 0 | not significant |
| 3854 | GO_NEGATIVE_REGULATION_OF_PHAGOCYTOSIS                            | -0.98 | 0.3  | 0 | 0 | 0 | not significant |
| 3855 | GO_PHOSPHATIDYLGLYCEROL_METABOLIC_PROCESS                         | -0.98 | 0.3  | 0 | 0 | 0 | not significant |
| 3856 | GO_PYRIMIDINE_RIBONUCLEOSIDE_TRIPHOSPHATE_BIOSYNTHETIC_PROCESS    | -0.98 | 0.3  | 0 | 0 | 0 | not significant |
| 3857 | GO_REGULATION_OF_MONOCYTE_DIFFERENTIATION                         | -0.98 | 0.3  | 0 | 0 | 0 | not significant |
| 3858 | GO_REGULATION_OF_RUFFLE_ASSEMBLY                                  | -0.98 | 0.3  | 0 | 0 | 0 | not significant |
| 3859 | GO_RESPONSE_TO_NITROSATIVE_STRESS                                 | -0.98 | 0.3  | 0 | 0 | 0 | not significant |
| 3860 | MOOTHA_TCA                                                        | -0.98 | 0.3  | 0 | 0 | 0 | not significant |
| 3861 | REACTOME_PLASMA_LIPOPROTEIN_ASSEMBLY                              | -0.98 | 0.3  | 0 | 0 | 0 | not significant |
| 3862 | REACTOME_REPRESSION_OF_WNT_TARGET_GENES                           | -0.98 | 0.3  | 0 | 0 | 0 | not significant |
| 3863 | REACTOME_SMAC_XIAP_REGULATED_APOPTOTIC_RESPONSE                   | -0.98 | 0.3  | 0 | 0 | 0 | not significant |
| 3864 | CHR5Q31                                                           | -0.98 | 0.29 | 0 | 0 | 0 | not significant |
| 3865 | GO_B_CELL_LINEAGE_COMMITMENT                                      | -0.98 | 0.29 | 0 | 0 | 0 | not significant |
| 3866 | GO_COHESIN_LOADING                                                | -0.98 | 0.29 | 0 | 0 | 0 | not significant |
| 3867 | GO_MODIFICATION_OF_POSTSYNAPTIC_ACTIN_CYTOSKELETON                | -0.98 | 0.29 | 0 | 0 | 0 | not significant |
| 3868 | GO_NK_T_CELL_ACTIVATION                                           | -0.98 | 0.29 | 0 | 0 | 0 | not significant |
| 3869 | GO_PROTEIN_SERINE_THREONINE_PHOSPHATASE_INHIBITOR_ACTIVITY        | -0.98 | 0.29 | 0 | 0 | 0 | not significant |
| 3870 | REACTOME_SIGNALING_BY_NTRK2_TRKB                                  | -0.98 | 0.29 | 0 | 0 | 0 | not significant |
| 3871 | CHR2P13                                                           | -0.98 | 0.28 | 0 | 0 | 0 | not significant |
| 3872 | GO_CELLULAR_RESPONSE_TO_ESTROGEN_STIMULUS                         | -0.98 | 0.28 | 0 | 0 | 0 | not significant |
| 3873 | GO_PEROXISOME_PROLIFERATOR_ACTIVATED_RECEPTOR_BINDING             | -0.98 | 0.28 | 0 | 0 | 0 | not significant |
| 3874 | GO_POSITIVE_REGULATION_BY_HOST_OF_VIRAL_GENOME_REPLICATION        | -0.98 | 0.28 | 0 | 0 | 0 | not significant |
| 3875 | GO_POSITIVE_REGULATION_OF_INTRACELLULAR_TRANSPORT                 | -0.98 | 0.28 | 0 | 0 | 0 | not significant |
| 3876 | GO_PROTEIN_LIPOYLATION                                            | -0.98 | 0.28 | 0 | 0 | 0 | not significant |
| 3877 | GO_PYRUVATE_DEHYDROGENASE_COMPLEX                                 | -0.98 | 0.28 | 0 | 0 | 0 | not significant |
| 3878 | GO_REACTIVE_OXYGEN_SPECIES_METABOLIC_PROCESS                      | -0.98 | 0.28 | 0 | 0 | 0 | not significant |
| 3879 | GO_REGULATION_OF_PROTEIN_LOCALIZATION_TO_CILIUM                   | -0.98 | 0.28 | 0 | 0 | 0 | not significant |
| 3880 | GO_PARANODE_REGION_OF_AXON                                        | -0.98 | 0.27 | 0 | 0 | 0 | not significant |
| 3881 | BENPORATH_ES_2                                                    | -0.97 | 0.33 | 0 | 0 | 0 | not significant |
| 3882 | GO_BLOOD_VESSEL_REMODELING                                        | -0.97 | 0.33 | 0 | 0 | 0 | not significant |
| 3883 | GO_ATPASE_BINDING                                                 | -0.97 | 0.32 | 0 | 0 | 0 | not significant |
| 3884 | GO_MITOTIC_CYTOKINETIC_PROCESS                                    | -0.97 | 0.32 | 0 | 0 | 0 | not significant |
| 3885 | GO_NEGATIVE_REGULATION_OF_RESPONSE_TO_DRUG                        | -0.97 | 0.32 | 0 | 0 | 0 | not significant |
| 3886 | GO_STRIATED_MUSCLE_CELL_PROLIFERATION                             | -0.97 | 0.32 | 0 | 0 | 0 | not significant |
| 3887 | REACTOME_BASE_EXCISION_REPAIR_AP_SITE_FORMATION                   | -0.97 | 0.32 | 0 | 0 | 0 | not significant |
| 3888 | AIGNER_ZEB1_TARGETS                                               | -0.97 | 0.31 | 0 | 0 | 0 | not significant |
| 3889 | GO_POSITIVE_REGULATION_OF_EPITHELIAL_TO_MESENCHYMAL_TRANSITION    | -0.97 | 0.31 | 0 | 0 | 0 | not significant |
| 3890 | GO_REGION_OF_CYTOSOL                                              | -0.97 | 0.31 | 0 | 0 | 0 | not significant |
| 3891 | GO_SPERMATID_NUCLEUS_DIFFERENTIATION                              | -0.97 | 0.31 | 0 | 0 | 0 | not significant |
| 3892 | JIANG_AGING_HYPOTHALAMUS_UP                                       | -0.97 | 0.31 | 0 | 0 | 0 | not significant |
| 3893 | KEGG_RIBOFLAVIN_METABOLISM                                        | -0.97 | 0.31 | 0 | 0 | 0 | not significant |
| 3894 | BAKER_HEMATOPOIESIS_STAT3_TARGETS                                 | -0.97 | 0.3  | 0 | 0 | 0 | not significant |
| 3895 | GO_CYTOPLASMIC_TRANSLATIONAL_INITIATION                           | -0.97 | 0.3  | 0 | 0 | 0 | not significant |
| 3896 | GO_POSTSYNAPTIC_CYTOSOL                                           | -0.97 | 0.3  | 0 | 0 | 0 | not significant |
| 3897 | GO_PROTEIN_FOLDING_CHAPERONE                                      | -0.97 | 0.3  | 0 | 0 | 0 | not significant |
| 3898 | GO_PURINE_NUCLEOSIDE_BIOSYNTHETIC_PROCESS                         | -0.97 | 0.3  | 0 | 0 | 0 | not significant |
| 3899 | GO_REGULATION_OF_TRANSLATIONAL_INITIATION_IN_RESPONSE_TO_STRESS   | -0.97 | 0.3  | 0 | 0 | 0 | not significant |
| 3900 | GO_RESPONSE_TO_VITAMIN_D                                          | -0.97 | 0.3  | 0 | 0 | 0 | not significant |
| 3901 | KYNG_WERNER_SYNDROM_DN                                            | -0.97 | 0.3  | 0 | 0 | 0 | not significant |
| 3902 | PEDERSEN_METASTASIS_BY_ERBB2_ISOFORM_6                            | -0.97 | 0.3  | 0 | 0 | 0 | not significant |
| 3903 | REACTOME_BILE_ACID_AND_BILE_SALT_METABOLISM                       | -0.97 | 0.3  | 0 | 0 | 0 | not significant |
| 3904 | REACTOME_CHAPERONE_MEDIATED_AUTOPHAGY                             | -0.97 | 0.3  | 0 | 0 | 0 | not significant |
| 3905 | REACTOME_DUAL_INCISION_IN_TC_NER                                  | -0.97 | 0.3  | 0 | 0 | 0 | not significant |
| 3906 | REACTOME_MET_PROMOTES_CELL_MOTILITY                               | -0.97 | 0.3  | 0 | 0 | 0 | not significant |
| 3907 | REACTOME_SYNTHESIS_OF_BILE_ACIDS_AND_BILE_SALTS                   | -0.97 | 0.3  | 0 | 0 | 0 | not significant |
| 3908 | REACTOME_UPTAKE_AND_FUNCTION_OF_ANTIHRAX_TOXINS                   | -0.97 | 0.3  | 0 | 0 | 0 | not significant |
| 3909 | SCHAEFFER_PROSTATE_DEVELOPMENT_AND_CANCER_BOX1_UP                 | -0.97 | 0.3  | 0 | 0 | 0 | not significant |
| 3910 | ALONSO_METASTASIS_UP                                              | -0.97 | 0.29 | 0 | 0 | 0 | not significant |
| 3911 | BIOCARTA_HVNEF_PATHWAY                                            | -0.97 | 0.29 | 0 | 0 | 0 | not significant |
| 3912 | GO_EXIT_FROM_MITOSIS                                              | -0.97 | 0.29 | 0 | 0 | 0 | not significant |



|      |                                                                     |       |      |   |   |   |                 |
|------|---------------------------------------------------------------------|-------|------|---|---|---|-----------------|
| 3913 | GO_G_QUADRUPLEX_DNA_BINDING                                         | -0.97 | 0.29 | 0 | 0 | 0 | not significant |
| 3914 | GO_METHYLATION_DEPENDENT_CHROMATIN_SILENCING                        | -0.97 | 0.29 | 0 | 0 | 0 | not significant |
| 3915 | GO_NEGATIVE_REGULATION_OF_TRANSPORTER_ACTIVITY                      | -0.97 | 0.29 | 0 | 0 | 0 | not significant |
| 3916 | GO_NEUROTROPHIN_TRK_RECEPTOR_SIGNALING_PATHWAY                      | -0.97 | 0.29 | 0 | 0 | 0 | not significant |
| 3917 | GO_REGULATION_OF_CALCIIUM_IION_DEPENDENT_EXOCYTOSIS                 | -0.97 | 0.29 | 0 | 0 | 0 | not significant |
| 3918 | GO_REGULATION_OF_CALCIIUM_IION_TRANSMEMBRANE_TRANSPORTER_ACTIVITY   | -0.97 | 0.29 | 0 | 0 | 0 | not significant |
| 3919 | KEGG_CYTOSOLIC_DNA_SENSING_PATHWAY                                  | -0.97 | 0.29 | 0 | 0 | 0 | not significant |
| 3920 | KOINUMA_COLON_CANCER_MSI_DN                                         | -0.97 | 0.29 | 0 | 0 | 0 | not significant |
| 3921 | MYLLYKANGAS_AMPLIFICATION_HOT_SPOT_24                               | -0.97 | 0.29 | 0 | 0 | 0 | not significant |
| 3922 | GO_COLUMNAR_CUBOIDAL_EPITHELIAL_CELL_DIFFERENTIATION                | -0.97 | 0.28 | 0 | 0 | 0 | not significant |
| 3923 | GO_REGULATION_OF_RIBONUCLEOPROTEIN_COMPLEX_LOCALIZATION             | -0.97 | 0.28 | 0 | 0 | 0 | not significant |
| 3924 | GO_VASCULAR_ASSOCIATED_SMOOTH_MUSCLE_CELL_APOPTOTIC_PROCESS         | -0.97 | 0.28 | 0 | 0 | 0 | not significant |
| 3925 | GO_NEUROTRANSMITTER_RECEPTOR_INTERNALIZATION                        | -0.97 | 0.27 | 0 | 0 | 0 | not significant |
| 3926 | GO_SCF_UBIQUITIN_LIGASE_COMPLEX                                     | -0.97 | 0.27 | 0 | 0 | 0 | not significant |
| 3927 | GO_VIRAL_TRANSLATIONAL_TERMINATION_REINITIATION                     | -0.97 | 0.27 | 0 | 0 | 0 | not significant |
| 3928 | REACTOME_METHIONINE_SALVAGE_PATHWAY                                 | -0.97 | 0.27 | 0 | 0 | 0 | not significant |
| 3929 | SCHAEFFER_PROSTATE_DEVELOPMENT_6HR_UP                               | -0.97 | 0.27 | 0 | 0 | 0 | not significant |
| 3930 | SCHUHMACHER_MYC_TARGETS_DN                                          | -0.97 | 0.27 | 0 | 0 | 0 | not significant |
| 3931 | GO_CELL_CORTEX                                                      | -0.97 | 0.26 | 0 | 0 | 0 | not significant |
| 3932 | GO_REGULATION_OF_GLUCOSE_TRANSMEMBRANE_TRANSPORT                    | -0.97 | 0.26 | 0 | 0 | 0 | not significant |
| 3933 | GO_TUMOR_NECROSIS_FACTOR_MEDIATED_SIGNALING_PATHWAY                 | -0.97 | 0.26 | 0 | 0 | 0 | not significant |
| 3934 | GO_VESICLE_TRANSPORT_ALONG_ACTIN_FILAMENT                           | -0.97 | 0.26 | 0 | 0 | 0 | not significant |
| 3935 | GO_REGULATION_OF_ORGANELLE_ASSEMBLY                                 | -0.97 | 0.25 | 0 | 0 | 0 | not significant |
| 3936 | RICKMAN_METASTASIS_DN                                               | -0.97 | 0.24 | 0 | 0 | 0 | not significant |
| 3937 | VANOEVELEN_MYOGENESIS_SIN3A_TARGETS                                 | -0.97 | 0.23 | 0 | 0 | 0 | not significant |
| 3938 | GO_CELL_GROWTH                                                      | -0.97 | 0.2  | 0 | 0 | 0 | not significant |
| 3939 | ASGHARZADEH_NEUROBLASTOMA_POOR_SURVIVAL_DN                          | -0.96 | 0.32 | 0 | 0 | 0 | not significant |
| 3940 | GO_NEGATIVE_REGULATION_OF_EXOCYTOSIS                                | -0.96 | 0.31 | 0 | 0 | 0 | not significant |
| 3941 | KYNG_RESPONSE_TO_H2O2_VIA_ERCC6                                     | -0.96 | 0.31 | 0 | 0 | 0 | not significant |
| 3942 | CHR2P23                                                             | -0.96 | 0.3  | 0 | 0 | 0 | not significant |
| 3943 | GO_CORTICAL_CYTOSKELETON_ORGANIZATION                               | -0.96 | 0.3  | 0 | 0 | 0 | not significant |
| 3944 | GO_GTP_METABOLIC_PROCESS                                            | -0.96 | 0.3  | 0 | 0 | 0 | not significant |
| 3945 | GO_LABYRINTHINE_LAYER_MORPHOGENESIS                                 | -0.96 | 0.3  | 0 | 0 | 0 | not significant |
| 3946 | GO_REGULATION_OF_PRESYNAPSE_ORGANIZATION                            | -0.96 | 0.3  | 0 | 0 | 0 | not significant |
| 3947 | GO_S_ADENOSYL_L_METHIONINE_BINDING                                  | -0.96 | 0.3  | 0 | 0 | 0 | not significant |
| 3948 | HEIDENBLAD_AMPLIFIED_IN_PANCREATIC_CANCER                           | -0.96 | 0.3  | 0 | 0 | 0 | not significant |
| 3949 | REACTOME_PRE_NOTCH_PROCESSING_IN_GOLGI                              | -0.96 | 0.3  | 0 | 0 | 0 | not significant |
| 3950 | BIOCARTA_BAD_PATHWAY                                                | -0.96 | 0.29 | 0 | 0 | 0 | not significant |
| 3951 | GO_POSITIVE_REGULATION_OF_CELL_GROWTH                               | -0.96 | 0.29 | 0 | 0 | 0 | not significant |
| 3952 | GO_POSITIVE_REGULATION_OF_MITOTIC_SISTER_CHROMATID_SEGREGATION      | -0.96 | 0.29 | 0 | 0 | 0 | not significant |
| 3953 | GO_POSITIVE_REGULATION_OF_OXIDOREDUCTASE_ACTIVITY                   | -0.96 | 0.29 | 0 | 0 | 0 | not significant |
| 3954 | GO_RETROMER_COMPLEX                                                 | -0.96 | 0.29 | 0 | 0 | 0 | not significant |
| 3955 | GO_SOMITE_DEVELOPMENT                                               | -0.96 | 0.29 | 0 | 0 | 0 | not significant |
| 3956 | KERLEY_RESPONSE_TO_CISPLATIN_UP                                     | -0.96 | 0.29 | 0 | 0 | 0 | not significant |
| 3957 | PID_NOTCH_PATHWAY                                                   | -0.96 | 0.29 | 0 | 0 | 0 | not significant |
| 3958 | REACTOME_NEF_MEDIATED_CD4_DOWN_REGULATION                           | -0.96 | 0.29 | 0 | 0 | 0 | not significant |
| 3959 | REACTOME_RAP1_SIGNALLING                                            | -0.96 | 0.29 | 0 | 0 | 0 | not significant |
| 3960 | ZHENG_IL22_SIGNALING_DN                                             | -0.96 | 0.29 | 0 | 0 | 0 | not significant |
| 3961 | ZHONG_SECRETOME_OF_LUNG_CANCER_AND_ENDOTHELIUM                      | -0.96 | 0.29 | 0 | 0 | 0 | not significant |
| 3962 | BIOCARTA_AKAP13_PATHWAY                                             | -0.96 | 0.28 | 0 | 0 | 0 | not significant |
| 3963 | CHR15Q13                                                            | -0.96 | 0.28 | 0 | 0 | 0 | not significant |
| 3964 | CHR7Q33                                                             | -0.96 | 0.28 | 0 | 0 | 0 | not significant |
| 3965 | GO_CELLULAR_RESPONSE_TO_NUTRIENT                                    | -0.96 | 0.28 | 0 | 0 | 0 | not significant |
| 3966 | GO_REGULATION_OF GRANULOCYTE DIFFERENTIATION                        | -0.96 | 0.28 | 0 | 0 | 0 | not significant |
| 3967 | GO_REGULATION_OF_SUPEROXIDE_ANION_GENERATION                        | -0.96 | 0.28 | 0 | 0 | 0 | not significant |
| 3968 | GO_RESPONSE_TO_HEPATOCYTE_GROWTH_FACTOR                             | -0.96 | 0.28 | 0 | 0 | 0 | not significant |
| 3969 | PID_RAC1_PATHWAY                                                    | -0.96 | 0.28 | 0 | 0 | 0 | not significant |
| 3970 | YE_METASTATIC_LIVER_CANCER                                          | -0.96 | 0.28 | 0 | 0 | 0 | not significant |
| 3971 | BIOCARTA_CBL_PATHWAY                                                | -0.96 | 0.27 | 0 | 0 | 0 | not significant |
| 3972 | DAZARD_UV_RESPONSE_CLUSTER_G1                                       | -0.96 | 0.27 | 0 | 0 | 0 | not significant |
| 3973 | FIRESTEIN_CTNNB1_PATHWAY_AND_PROLIFERATION                          | -0.96 | 0.27 | 0 | 0 | 0 | not significant |
| 3974 | GO_ELONGATOR_HOLOENZYME_COMPLEX                                     | -0.96 | 0.27 | 0 | 0 | 0 | not significant |
| 3975 | GO_NEGATIVE_REGULATION_OF_PEPTIDASE_ACTIVITY                        | -0.96 | 0.27 | 0 | 0 | 0 | not significant |
| 3976 | GO_NEGATIVE_REGULATION_OF_PROTEIN_COMPLEX_ASSEMBLY                  | -0.96 | 0.27 | 0 | 0 | 0 | not significant |
| 3977 | GO_PANCREATIC_JUICE_SECRETION                                       | -0.96 | 0.27 | 0 | 0 | 0 | not significant |
| 3978 | GO_PIGMENT_ACCUMULATION                                             | -0.96 | 0.27 | 0 | 0 | 0 | not significant |
| 3979 | GO_UBIQUITIN_CONJUGATING_ENZYME_BINDING                             | -0.96 | 0.27 | 0 | 0 | 0 | not significant |
| 3980 | GO_CYCLOOXYGENASE_PATHWAY                                           | -0.96 | 0.26 | 0 | 0 | 0 | not significant |
| 3981 | GO_H4_HISTONE_ACETYLTRANSFERASE_COMPLEX                             | -0.96 | 0.26 | 0 | 0 | 0 | not significant |
| 3982 | GO_INTRINSIC_APOPTOTIC_SIGNALING_PATHWAY_IN_RESPONSE_TO_HYPOXIA     | -0.96 | 0.26 | 0 | 0 | 0 | not significant |
| 3983 | GO_NEGATIVE_REGULATION_OF_CELL_DIVISION                             | -0.96 | 0.26 | 0 | 0 | 0 | not significant |
| 3984 | MATTIOLI_MGUS_VS_PCL                                                | -0.96 | 0.26 | 0 | 0 | 0 | not significant |
| 3985 | MCBRYAN_TERMINAL_END_BUD_UP                                         | -0.96 | 0.26 | 0 | 0 | 0 | not significant |
| 3986 | GO_NEGATIVE_REGULATION_OF_MAPK_CASCADE                              | -0.96 | 0.24 | 0 | 0 | 0 | not significant |
| 3987 | BENPORATH_OCT4_TARGETS                                              | -0.96 | 0.23 | 0 | 0 | 0 | not significant |
| 3988 | GO_POSITIVE_REGULATION_OF_PROTEIN_COMPLEX_ASSEMBLY                  | -0.96 | 0.23 | 0 | 0 | 0 | not significant |
| 3989 | GRYDER_PAXFOXO1_TOP_ENHANCERS                                       | -0.96 | 0.18 | 0 | 0 | 0 | not significant |
| 3990 | GO_CILIUM                                                           | -0.96 | 0.17 | 0 | 0 | 0 | not significant |
| 3991 | GO_NUCLEAR_CHROMATIN                                                | -0.96 | 0.17 | 0 | 0 | 0 | not significant |
| 3992 | GO_ZINC_IION_BINDING                                                | -0.96 | 0.14 | 0 | 0 | 0 | not significant |
| 3993 | BIOCARTA_CTCF_PATHWAY                                               | -0.95 | 0.31 | 0 | 0 | 0 | not significant |
| 3994 | GO_BIOTIN_METABOLIC_PROCESS                                         | -0.95 | 0.3  | 0 | 0 | 0 | not significant |
| 3995 | GO_CATION_CATION_ANTIPORTER_ACTIVITY                                | -0.95 | 0.3  | 0 | 0 | 0 | not significant |
| 3996 | GO_CALCINEURIN_MEDIATED_SIGNALING                                   | -0.95 | 0.29 | 0 | 0 | 0 | not significant |
| 3997 | GO_NEGATIVE_REGULATION_OF_PROTEASOMAL_PROTEIN_CATABOLIC_PROCESS     | -0.95 | 0.29 | 0 | 0 | 0 | not significant |
| 3998 | GO_POSITIVE_REGULATION_OF_OXIDATIVE_STRESS_INDUCED_CELL_DEATH       | -0.95 | 0.29 | 0 | 0 | 0 | not significant |
| 3999 | CHR7Q32                                                             | -0.95 | 0.28 | 0 | 0 | 0 | not significant |
| 4000 | GO_3_UTR_MEDIATED_MRNA_STABILIZATION                                | -0.95 | 0.28 | 0 | 0 | 0 | not significant |
| 4001 | GO_MONONUCLEAR_CELL_DIFFERENTIATION                                 | -0.95 | 0.28 | 0 | 0 | 0 | not significant |
| 4002 | GO_MRNA_3_SPLICE_SITE_RECOGNITION                                   | -0.95 | 0.28 | 0 | 0 | 0 | not significant |
| 4003 | GO_NEGATIVE_REGULATION_OF_KIDNEY_DEVELOPMENT                        | -0.95 | 0.28 | 0 | 0 | 0 | not significant |
| 4004 | GO_NUCLEOSOME_POSITIONING                                           | -0.95 | 0.28 | 0 | 0 | 0 | not significant |
| 4005 | GO_POSITIVE_REGULATION_OF_RUFFLE_ASSEMBLY                           | -0.95 | 0.28 | 0 | 0 | 0 | not significant |
| 4006 | GO_REGULATION_OF_INTRINSIC_APOPTOTIC_SIGNALING_PATHWAY_IN_RESPONSE  | -0.95 | 0.28 | 0 | 0 | 0 | not significant |
| 4007 | GO_REGULATION_OF_MYOBlast_DIFFERENTIATION                           | -0.95 | 0.28 | 0 | 0 | 0 | not significant |
| 4008 | GO_SMALL_RNA_LOADING_ONTO_RISC                                      | -0.95 | 0.28 | 0 | 0 | 0 | not significant |
| 4009 | LI_WILMS_TUMOR_VS_FETAL_KIDNEY_2_UP                                 | -0.95 | 0.28 | 0 | 0 | 0 | not significant |
| 4010 | PID_ERBB1_RECEPTOR_PROXIMAL_PATHWAY                                 | -0.95 | 0.28 | 0 | 0 | 0 | not significant |
| 4011 | REACTOME_CITRIC_ACID_CYCLE_TCA_CYCLE                                | -0.95 | 0.28 | 0 | 0 | 0 | not significant |
| 4012 | THEODOROU_MAMMARY_TUMORIGENESIS                                     | -0.95 | 0.28 | 0 | 0 | 0 | not significant |
| 4013 | CHR8Q21                                                             | -0.95 | 0.27 | 0 | 0 | 0 | not significant |
| 4014 | CLIMENT_BREAST_CANCER_COPY_NUMBER_DN                                | -0.95 | 0.27 | 0 | 0 | 0 | not significant |
| 4015 | GENTILE_UV_RESPONSE_CLUSTER_D2                                      | -0.95 | 0.27 | 0 | 0 | 0 | not significant |
| 4016 | GO_BRONCHUS_DEVELOPMENT                                             | -0.95 | 0.27 | 0 | 0 | 0 | not significant |
| 4017 | GO_ER_MEMBRANE_PROTEIN_COMPLEX                                      | -0.95 | 0.27 | 0 | 0 | 0 | not significant |
| 4018 | GO_FUCOSYLTRANSFERASE_ACTIVITY                                      | -0.95 | 0.27 | 0 | 0 | 0 | not significant |
| 4019 | GO_Glutamate_Receptor_Binding                                       | -0.95 | 0.27 | 0 | 0 | 0 | not significant |
| 4020 | GO_NEURON_REMODELING                                                | -0.95 | 0.27 | 0 | 0 | 0 | not significant |
| 4021 | GO_PEPTIDYL_DIPHTHAMIDE_BIOSYNTHETIC_PROCESS_FROM_PEPTIDYL_HISTIDIN | -0.95 | 0.27 | 0 | 0 | 0 | not significant |

|      |                                                                     |       |      |   |   |   |                 |
|------|---------------------------------------------------------------------|-------|------|---|---|---|-----------------|
| 4022 | GO_PEROXIREDOXIN_ACTIVITY                                           | -0.95 | 0.27 | 0 | 0 | 0 | not significant |
| 4023 | GO_POSITIVE_REGULATION_OF_RESPONSE_TO_OXIDATIVE_STRESS              | -0.95 | 0.27 | 0 | 0 | 0 | not significant |
| 4024 | GO_REGULATION_OF_METANEPHROS_DEVELOPMENT                            | -0.95 | 0.27 | 0 | 0 | 0 | not significant |
| 4025 | GO_RESPONSE_TO_BRONCHODILATOR                                       | -0.95 | 0.27 | 0 | 0 | 0 | not significant |
| 4026 | GO_SIN3_COMPLEX                                                     | -0.95 | 0.27 | 0 | 0 | 0 | not significant |
| 4027 | GO_TELOMERASE_HOLOENZYME_COMPLEX_ASSEMBLY                           | -0.95 | 0.27 | 0 | 0 | 0 | not significant |
| 4028 | CHR2Q35                                                             | -0.95 | 0.26 | 0 | 0 | 0 | not significant |
| 4029 | GO_MACROLIDE_BINDING                                                | -0.95 | 0.26 | 0 | 0 | 0 | not significant |
| 4030 | GO_NEGATIVE_REGULATION_OF_SUBSTRATE_ADHESION_DEPENDENT_CELL_SPRI    | -0.95 | 0.26 | 0 | 0 | 0 | not significant |
| 4031 | GO_PHOSPHOLIPID_DEPHOSPHORYLATION                                   | -0.95 | 0.26 | 0 | 0 | 0 | not significant |
| 4032 | GO_POSITIVE_REGULATION_OF_SMOOTH_MUSCLE_CELL_DIFFERENTIATION        | -0.95 | 0.26 | 0 | 0 | 0 | not significant |
| 4033 | GO_REGULATION_OF_NUCLEAR_TRANSCRIBED_MRNA_POLY_A_TAIL_SHORTENING    | -0.95 | 0.26 | 0 | 0 | 0 | not significant |
| 4034 | GO_RESPONSE_TO_THYROID_HORMONE                                      | -0.95 | 0.26 | 0 | 0 | 0 | not significant |
| 4035 | NIELSEN_SYNOVIAL_SARCOMA_UP                                         | -0.95 | 0.26 | 0 | 0 | 0 | not significant |
| 4036 | SIG_CHEMOTAXIS                                                      | -0.95 | 0.26 | 0 | 0 | 0 | not significant |
| 4037 | TBK1.DN.48HRS_UP                                                    | -0.95 | 0.26 | 0 | 0 | 0 | not significant |
| 4038 | CHR7Q34                                                             | -0.95 | 0.25 | 0 | 0 | 0 | not significant |
| 4039 | GO_CDC73_PAF1_COMPLEX                                               | -0.95 | 0.25 | 0 | 0 | 0 | not significant |
| 4040 | GO_CYSTEINE_TYPE_PEPTIDASE_ACTIVITY                                 | -0.95 | 0.25 | 0 | 0 | 0 | not significant |
| 4041 | GO_D1_DOPAMINE_RECEPTOR_BINDING                                     | -0.95 | 0.25 | 0 | 0 | 0 | not significant |
| 4042 | GO_MONOVALENT_CATION_PROTON_ANTIPORTER_ACTIVITY                     | -0.95 | 0.25 | 0 | 0 | 0 | not significant |
| 4043 | GO_PARASPECKLES                                                     | -0.95 | 0.25 | 0 | 0 | 0 | not significant |
| 4044 | GO_STEROID_HORMONE_SECRETION                                        | -0.95 | 0.25 | 0 | 0 | 0 | not significant |
| 4045 | PRC2_EZH2_UP.V1_UP                                                  | -0.95 | 0.25 | 0 | 0 | 0 | not significant |
| 4046 | GO_CAMERA_TYPE_EYE_PHOTORECEPTOR_CELL_DIFFERENTIATION               | -0.95 | 0.24 | 0 | 0 | 0 | not significant |
| 4047 | GO_NEGATIVE_REGULATION_OF_AUTOPHAGY                                 | -0.95 | 0.24 | 0 | 0 | 0 | not significant |
| 4048 | GO_POSITIVE_REGULATION_OF_BINDING                                   | -0.95 | 0.24 | 0 | 0 | 0 | not significant |
| 4049 | GO_POSITIVE_REGULATION_OF_LAMELLIPODIUM_MORPHOGENESIS               | -0.95 | 0.24 | 0 | 0 | 0 | not significant |
| 4050 | GO_REGULATION_OF_DENDRITE_DEVELOPMENT                               | -0.95 | 0.24 | 0 | 0 | 0 | not significant |
| 4051 | GO_AMIDE_BINDING                                                    | -0.95 | 0.23 | 0 | 0 | 0 | not significant |
| 4052 | GO_DEVELOPMENTAL_CELL_GROWTH                                        | -0.95 | 0.22 | 0 | 0 | 0 | not significant |
| 4053 | GO_INTRACELLULAR_STEROID_HORMONE_RECEPTOR_SIGNALING_PATHWAY         | -0.95 | 0.22 | 0 | 0 | 0 | not significant |
| 4054 | GO_PATTERN_SPECIFICATION_PROCESS                                    | -0.95 | 0.21 | 0 | 0 | 0 | not significant |
| 4055 | KOINUMA_TARGETS_OF_SMAD2_OR_SMAD3                                   | -0.95 | 0.18 | 0 | 0 | 0 | not significant |
| 4056 | GO_REGULATION_OF_SYSTEM_PROCESS                                     | -0.95 | 0.17 | 0 | 0 | 0 | not significant |
| 4057 | GO_EPITHELIUM_DEVELOPMENT                                           | -0.95 | 0.12 | 0 | 0 | 0 | not significant |
| 4058 | GO_TRANSITION_METAL_ION_BINDING                                     | -0.95 | 0.12 | 0 | 0 | 0 | not significant |
| 4059 | GO_CELL_CELL_SIGNALING                                              | -0.95 | 0.1  | 0 | 0 | 0 | not significant |
| 4060 | GO_POSITIVE_REGULATION_OF_EXTRINSIC_APOPTOTIC_SIGNALING_PATHWAY_VIA | -0.94 | 0.29 | 0 | 0 | 0 | not significant |
| 4061 | TOKNS_TARGETS_OF_RUNX1_RUNX1T1_FUSION_GRANULOCYTE_UP                | -0.94 | 0.29 | 0 | 0 | 0 | not significant |
| 4062 | BIOCARTA_BARRESTIN_SRC_PATHWAY                                      | -0.94 | 0.28 | 0 | 0 | 0 | not significant |
| 4063 | CHANG_IMMORTALIZED_BY_HPV31_UP                                      | -0.94 | 0.28 | 0 | 0 | 0 | not significant |
| 4064 | GO_CELLULAR_COMPONENT_DISASSEMBLY_INVOLVED_IN_EXECUTION_PHASE_OF    | -0.94 | 0.28 | 0 | 0 | 0 | not significant |
| 4065 | GO_COMPLEMENT_ACTIVATION                                            | -0.94 | 0.28 | 0 | 0 | 0 | not significant |
| 4066 | GO_CYTOCHROME_COMPLEX                                               | -0.94 | 0.28 | 0 | 0 | 0 | not significant |
| 4067 | GO_DETECTION_OF_STIMULUS_INVOLVED_IN_SENSORY_PERCEPTION             | -0.94 | 0.28 | 0 | 0 | 0 | not significant |
| 4068 | GO_GOLGI_TO_VACUOLE_TRANSPORT                                       | -0.94 | 0.28 | 0 | 0 | 0 | not significant |
| 4069 | GO_INHIBITORY_SYNAPSE                                               | -0.94 | 0.28 | 0 | 0 | 0 | not significant |
| 4070 | GO_MAMMARY_GLAND_MORPHOGENESIS                                      | -0.94 | 0.28 | 0 | 0 | 0 | not significant |
| 4071 | GO_MITOTIC_CHROMOSOME_CONDENSATION                                  | -0.94 | 0.28 | 0 | 0 | 0 | not significant |
| 4072 | JAZAG_TGFB1_SIGNALING_VIA_SMAD4_DN                                  | -0.94 | 0.28 | 0 | 0 | 0 | not significant |
| 4073 | GO_9PLUS0_NON_MOTILE_CILIUM                                         | -0.94 | 0.27 | 0 | 0 | 0 | not significant |
| 4074 | GO_AXONEME_PART                                                     | -0.94 | 0.27 | 0 | 0 | 0 | not significant |
| 4075 | GO_CELLULAR_RESPONSE_TO_OXYGEN_RADICAL                              | -0.94 | 0.27 | 0 | 0 | 0 | not significant |
| 4076 | GO_NEGATIVE_REGULATION_OF_CARBOHYDRATE_METABOLIC_PROCESS            | -0.94 | 0.27 | 0 | 0 | 0 | not significant |
| 4077 | GO_REGULATION_OF_FILOPODIUM_ASSEMBLY                                | -0.94 | 0.27 | 0 | 0 | 0 | not significant |
| 4078 | GO_TRACHEA_MORPHOGENESIS                                            | -0.94 | 0.27 | 0 | 0 | 0 | not significant |
| 4079 | GRASEMANN_RETINOBLASTOMA_WITH_6P_AMPLIFICATION                      | -0.94 | 0.27 | 0 | 0 | 0 | not significant |
| 4080 | KEGG_SELENOAMINO_ACID_METABOLISM                                    | -0.94 | 0.27 | 0 | 0 | 0 | not significant |
| 4081 | NADERI_BREAST_CANCER_PROGNOSIS_DN                                   | -0.94 | 0.27 | 0 | 0 | 0 | not significant |
| 4082 | REACTOME_MRNA_DECAY_BY_3_TO_5_EXORIBONUCLEASE                       | -0.94 | 0.26 | 0 | 0 | 0 | not significant |
| 4083 | BIOCARTA_ARF_PATHWAY                                                | -0.94 | 0.26 | 0 | 0 | 0 | not significant |
| 4084 | CHR4Q12                                                             | -0.94 | 0.26 | 0 | 0 | 0 | not significant |
| 4085 | GENTILE_UV_RESPONSE_CLUSTER_D8                                      | -0.94 | 0.26 | 0 | 0 | 0 | not significant |
| 4086 | GO_BETA_CATENIN_DESTRUCTION_COMPLEX                                 | -0.94 | 0.26 | 0 | 0 | 0 | not significant |
| 4087 | GO_CARDIAC_CONDUCTION_SYSTEM_DEVELOPMENT                            | -0.94 | 0.26 | 0 | 0 | 0 | not significant |
| 4088 | GO_CORONARY_VASCULATURE_MORPHOGENESIS                               | -0.94 | 0.26 | 0 | 0 | 0 | not significant |
| 4089 | GO_PEPTIDYL_HISTIDINE_MODIFICATION                                  | -0.94 | 0.26 | 0 | 0 | 0 | not significant |
| 4090 | GO_POSITIVE_REGULATION_OF_AMINO_ACID_TRANSPORT                      | -0.94 | 0.26 | 0 | 0 | 0 | not significant |
| 4091 | GO_POSITIVE_REGULATION_OF_CELLULAR_RESPONSE_TO_INSULIN_STIMULUS     | -0.94 | 0.26 | 0 | 0 | 0 | not significant |
| 4092 | GO_REGULATION_OF_CHONDROCYTE_DIFFERENTIATION                        | -0.94 | 0.26 | 0 | 0 | 0 | not significant |
| 4093 | KEGG_AMINO_SUGAR_AND_NUCLEOTIDE_SUGAR_METABOLISM                    | -0.94 | 0.26 | 0 | 0 | 0 | not significant |
| 4094 | KEGG_PYRUVATE_METABOLISM                                            | -0.94 | 0.26 | 0 | 0 | 0 | not significant |
| 4095 | KOKKINAKIS_METHIONINE_DEPRIVATION_48HR_DN                           | -0.94 | 0.26 | 0 | 0 | 0 | not significant |
| 4096 | LABBE_TGFB1_TARGETS_DN                                              | -0.94 | 0.26 | 0 | 0 | 0 | not significant |
| 4097 | PID_IL2_P3K_PATHWAY                                                 | -0.94 | 0.26 | 0 | 0 | 0 | not significant |
| 4098 | REACTOME_RAS_ACTIVATION_UPON_CA2PLUS_INFLUX_THROUGH_NMDA_RECEPT     | -0.94 | 0.26 | 0 | 0 | 0 | not significant |
| 4099 | XJ_CREBBP_TARGETS_UP                                                | -0.94 | 0.26 | 0 | 0 | 0 | not significant |
| 4100 | FLOTHO_PEDIATRIC_ALL_THERAPY_RESPONSE_DN                            | -0.94 | 0.25 | 0 | 0 | 0 | not significant |
| 4101 | GO_DNA_DEAMINATION                                                  | -0.94 | 0.25 | 0 | 0 | 0 | not significant |
| 4102 | GO_MEMBRANE_DEPOLARIZATION_DURING_CARDIAC_MUSCLE_CELL_ACTION_POT    | -0.94 | 0.25 | 0 | 0 | 0 | not significant |
| 4103 | GO_OBSERVATIONAL_LEARNING                                           | -0.94 | 0.25 | 0 | 0 | 0 | not significant |
| 4104 | GO_POSTSYNAPTIC_DENSITY_ASSEMBLY                                    | -0.94 | 0.25 | 0 | 0 | 0 | not significant |
| 4105 | GO_SINGLE_STRANDED_VIRAL_RNA_REPLICATION_VIA_DOUBLE_STRANDED_DNA    | -0.94 | 0.25 | 0 | 0 | 0 | not significant |
| 4106 | GO_SUBSTRATE_ADHESION_DEPENDENT_CELL_SPREADING                      | -0.94 | 0.25 | 0 | 0 | 0 | not significant |
| 4107 | GO_SUCCINYL_COA_METABOLIC_PROCESS                                   | -0.94 | 0.25 | 0 | 0 | 0 | not significant |
| 4108 | LUI_THYROID_CANCER_CLUSTER_4                                        | -0.94 | 0.25 | 0 | 0 | 0 | not significant |
| 4109 | REACTOME_RSK_ACTIVATION                                             | -0.94 | 0.25 | 0 | 0 | 0 | not significant |
| 4110 | ROYLANCE_BREAST_CANCER_16Q_COPY_NUMBER_UP                           | -0.94 | 0.25 | 0 | 0 | 0 | not significant |
| 4111 | TURASHVILI_BREAST_NORMAL_DUCTAL_VS_LOBULAR_DN                       | -0.94 | 0.25 | 0 | 0 | 0 | not significant |
| 4112 | GO_INSULIN_BINDING                                                  | -0.94 | 0.24 | 0 | 0 | 0 | not significant |
| 4113 | GO_MUSCLE_HYPERTROPHY                                               | -0.94 | 0.24 | 0 | 0 | 0 | not significant |
| 4114 | GO_PROTEIN_LOCALIZATION_TO_CILIUM                                   | -0.94 | 0.24 | 0 | 0 | 0 | not significant |
| 4115 | GO_REGULATION_OF_NOTCH_SIGNALING_PATHWAY                            | -0.94 | 0.24 | 0 | 0 | 0 | not significant |
| 4116 | GO_RESPONSE_TO_LEUKEMIA_INHIBITORY_FACTOR                           | -0.94 | 0.24 | 0 | 0 | 0 | not significant |
| 4117 | PID_HIF2PATHWAY                                                     | -0.94 | 0.24 | 0 | 0 | 0 | not significant |
| 4118 | REACTOME_SIGNALING_BY_BRAF_AND_RAF_FUSIONS                          | -0.94 | 0.24 | 0 | 0 | 0 | not significant |
| 4119 | SEKI_INFLAMMATORY_RESPONSE_LPS_DN                                   | -0.94 | 0.24 | 0 | 0 | 0 | not significant |
| 4120 | GO_CONTRACTILE_ACTIN_FILAMENT_BUNDLE_ASSEMBLY                       | -0.94 | 0.23 | 0 | 0 | 0 | not significant |
| 4121 | GO_POSITIVE_REGULATION_OF_PLASMA_MEMBRANE_BOUNDED_CELL_PROJECTIC    | -0.94 | 0.23 | 0 | 0 | 0 | not significant |
| 4122 | GO_ENHANCER_BINDING                                                 | -0.94 | 0.22 | 0 | 0 | 0 | not significant |
| 4123 | GO_EPIDERMIS_DEVELOPMENT                                            | -0.94 | 0.22 | 0 | 0 | 0 | not significant |
| 4124 | GO_TRANSCRIPTION_COUPLED_NUCLEOTIDE_EXCISION_REPAIR                 | -0.94 | 0.22 | 0 | 0 | 0 | not significant |
| 4125 | YAO_TEMPORAL_RESPONSE_TO_PROGESTERONE_CLUSTER_17                    | -0.94 | 0.22 | 0 | 0 | 0 | not significant |
| 4126 | GO_RETROGRADE_TRANSPORT_ENDOSOME_TO_GOLGI                           | -0.94 | 0.21 | 0 | 0 | 0 | not significant |
| 4127 | GO_ANIMAL_ORGAN_MORPHOGENESIS                                       | -0.94 | 0.13 | 0 | 0 | 0 | not significant |
| 4128 | GO_ACETYL_COA_BIOSYNTHETIC_PROCESS_FROM_PYRUVATE                    | -0.93 | 0.28 | 0 | 0 | 0 | not significant |
| 4129 | GO_PEPTIDYL_LYSINE_DIMETHYLATION                                    | -0.93 | 0.28 | 0 | 0 | 0 | not significant |
| 4130 | GO_BODY_MORPHOGENESIS                                               | -0.93 | 0.27 | 0 | 0 | 0 | not significant |

|      |                                                                     |       |      |   |   |   |                 |
|------|---------------------------------------------------------------------|-------|------|---|---|---|-----------------|
| 4131 | ONGUSAHA_TP53_TARGETS                                               | -0.93 | 0.27 | 0 | 0 | 0 | not significant |
| 4132 | REACTOME_RECEPTOR_MEDIATED_MITOPHAGY                                | -0.93 | 0.27 | 0 | 0 | 0 | not significant |
| 4133 | ROZANOV_MMP14_TARGETS_DN                                            | -0.93 | 0.27 | 0 | 0 | 0 | not significant |
| 4134 | BIOCARTA_VIP_PATHWAY                                                | -0.93 | 0.26 | 0 | 0 | 0 | not significant |
| 4135 | GO_CORONARY_VASCULATURE_DEVELOPMENT                                 | -0.93 | 0.26 | 0 | 0 | 0 | not significant |
| 4136 | GO_CYTOPLASMIC_TRANSLATIONAL_ELONGATION                             | -0.93 | 0.26 | 0 | 0 | 0 | not significant |
| 4137 | GO_EXONUCLEOLYTIC_TRIMMING_INVOLVED_IN_RRNA_PROCESSING              | -0.93 | 0.26 | 0 | 0 | 0 | not significant |
| 4138 | GO_NEGATIVE_REGULATION_OF_CALCIIUM_IION_TRANSPORT_INTO_CYTOSOL      | -0.93 | 0.26 | 0 | 0 | 0 | not significant |
| 4139 | GO_NEGATIVE_REGULATION_OF_DENDRITE_DEVELOPMENT                      | -0.93 | 0.26 | 0 | 0 | 0 | not significant |
| 4140 | GO_NEGATIVE_REGULATION_OF_OLIGODENDROCYTE_DIFFERENTIATION           | -0.93 | 0.26 | 0 | 0 | 0 | not significant |
| 4141 | GO_POSITIVE_REGULATION_OF_RESPONSE_TO_CYTOKINE_STIMULUS             | -0.93 | 0.26 | 0 | 0 | 0 | not significant |
| 4142 | GO_REGULATION_OF_PROTON_TRANSPORT                                   | -0.93 | 0.26 | 0 | 0 | 0 | not significant |
| 4143 | GO_STRUCTURAL_CONSTITUENT_OF_MUSCLE                                 | -0.93 | 0.26 | 0 | 0 | 0 | not significant |
| 4144 | PID_IL1_PATHWAY                                                     | -0.93 | 0.26 | 0 | 0 | 0 | not significant |
| 4145 | REACTOME_CYTOCHROME_P450_ARRANGED_BY_SUBSTRATE_TYPE                 | -0.93 | 0.26 | 0 | 0 | 0 | not significant |
| 4146 | SETLUR_PROSTATE_CANCER_TMPRSS2_ERG_FUSION_UP                        | -0.93 | 0.26 | 0 | 0 | 0 | not significant |
| 4147 | CHR13Q12                                                            | -0.93 | 0.25 | 0 | 0 | 0 | not significant |
| 4148 | CHR1P22                                                             | -0.93 | 0.25 | 0 | 0 | 0 | not significant |
| 4149 | GO_DENDRITIC_SPINE_MAINTENANCE                                      | -0.93 | 0.25 | 0 | 0 | 0 | not significant |
| 4150 | GO_NEGATIVE_REGULATION_OF_TELOMERASE_ACTIVITY                       | -0.93 | 0.25 | 0 | 0 | 0 | not significant |
| 4151 | GO_NUCLEOTIDE_SUGAR_BIOSYNTHETIC_PROCESS                            | -0.93 | 0.25 | 0 | 0 | 0 | not significant |
| 4152 | GO_PEPTIDASE_ACTIVATOR_ACTIVITY                                     | -0.93 | 0.25 | 0 | 0 | 0 | not significant |
| 4153 | GO_POSITIVE_REGULATION_OF_GRANULOCYTE_CHEMOTAXIS                    | -0.93 | 0.25 | 0 | 0 | 0 | not significant |
| 4154 | GO_POSITIVE_REGULATION_OF_HEXOKINASE_ACTIVITY                       | -0.93 | 0.25 | 0 | 0 | 0 | not significant |
| 4155 | GO_PRESYNAPTIC_ACTIVE_ZONE                                          | -0.93 | 0.25 | 0 | 0 | 0 | not significant |
| 4156 | GO_REGULATION_OF_HISTONE_H4_K16_ACETYLATION                         | -0.93 | 0.25 | 0 | 0 | 0 | not significant |
| 4157 | GO_REGULATION_OF_MITOCHONDRIAL_TRANSLATION                          | -0.93 | 0.25 | 0 | 0 | 0 | not significant |
| 4158 | HADDAD_T_LYMPHOCYTE_AND_NK_PROGENITOR_DN                            | -0.93 | 0.25 | 0 | 0 | 0 | not significant |
| 4159 | JAZAERI_BREAST_CANCER_BRCA1_VS_BRCA2_DN                             | -0.93 | 0.25 | 0 | 0 | 0 | not significant |
| 4160 | LEE_LIVER_CANCER_DENA_UP                                            | -0.93 | 0.25 | 0 | 0 | 0 | not significant |
| 4161 | REACTOME_NUCLEAR_EVENTS_KINASE_AND_TRANSCRIPTION_FACTOR_ACTIVATION  | -0.93 | 0.25 | 0 | 0 | 0 | not significant |
| 4162 | BARRIER_COLON_CANCER_RECURRENCE_UP                                  | -0.93 | 0.24 | 0 | 0 | 0 | not significant |
| 4163 | CHR2Q33                                                             | -0.93 | 0.24 | 0 | 0 | 0 | not significant |
| 4164 | DAVIES_MULTIPLE_MYELOMA_VS_MGUS_UP                                  | -0.93 | 0.24 | 0 | 0 | 0 | not significant |
| 4165 | DORN_ADENOVIRUS_INFECTION_32HR_UP                                   | -0.93 | 0.24 | 0 | 0 | 0 | not significant |
| 4166 | GO_ADHERENS_JUNCTION_ASSEMBLY                                       | -0.93 | 0.24 | 0 | 0 | 0 | not significant |
| 4167 | GO_ANDROGEN_METABOLIC_PROCESS                                       | -0.93 | 0.24 | 0 | 0 | 0 | not significant |
| 4168 | GO_BETA_CATENIN_TCF_COMPLEX_ASSEMBLY                                | -0.93 | 0.24 | 0 | 0 | 0 | not significant |
| 4169 | GO_CELLULAR_COMPONENT_MAINTENANCE                                   | -0.93 | 0.24 | 0 | 0 | 0 | not significant |
| 4170 | GO_CLATHRIN_DEPENDENT_ENDOCYTOSIS                                   | -0.93 | 0.24 | 0 | 0 | 0 | not significant |
| 4171 | GO_DNA_DEMETHYLATION                                                | -0.93 | 0.24 | 0 | 0 | 0 | not significant |
| 4172 | GO_NUCLEAR_EXOSOME_RNASE_COMPLEX                                    | -0.93 | 0.24 | 0 | 0 | 0 | not significant |
| 4173 | GO_PRESYNAPTIC_MEMBRANE_ORGANIZATION                                | -0.93 | 0.24 | 0 | 0 | 0 | not significant |
| 4174 | REACTOME_GABA_B_RECEPTOR_ACTIVATION                                 | -0.93 | 0.24 | 0 | 0 | 0 | not significant |
| 4175 | TURJANSKI_MAPK8_AND_MAPK9_TARGETS                                   | -0.93 | 0.24 | 0 | 0 | 0 | not significant |
| 4176 | HAHTOLA_SEZARY_SYNDROME_DN                                          | -0.93 | 0.23 | 0 | 0 | 0 | not significant |
| 4177 | REACTOME_INTRINSIC_PATHWAY_FOR_APOPTOSIS                            | -0.93 | 0.23 | 0 | 0 | 0 | not significant |
| 4178 | REACTOME_LOSS_OF_FUNCTION_OF_TGFB1_IN_CANCER                        | -0.93 | 0.23 | 0 | 0 | 0 | not significant |
| 4179 | CHR10Q24                                                            | -0.93 | 0.22 | 0 | 0 | 0 | not significant |
| 4180 | GNATENKO_PLATELET_SIGNATURE                                         | -0.93 | 0.22 | 0 | 0 | 0 | not significant |
| 4181 | GO_G_PROTEIN_COUPLED_SEROTONIN_RECEPTOR_BINDING                     | -0.93 | 0.22 | 0 | 0 | 0 | not significant |
| 4182 | GO_NEGATIVE_REGULATION_OF_TRANSMEMBRANE_TRANSPORT                   | -0.93 | 0.22 | 0 | 0 | 0 | not significant |
| 4183 | GO_POSITIVE_REGULATION_OF_CELL_CYCLE_PHASE_TRANSITION               | -0.93 | 0.22 | 0 | 0 | 0 | not significant |
| 4184 | GO_POSITIVE_REGULATION_OF_IRE1_MEDIATED_UNFOLDED_PROTEIN_RESPONSE   | -0.93 | 0.22 | 0 | 0 | 0 | not significant |
| 4185 | KEGG_MTOR_SIGNALING_PATHWAY                                         | -0.93 | 0.22 | 0 | 0 | 0 | not significant |
| 4186 | PECE_MAMMARY_STEM_CELL_DN                                           | -0.93 | 0.22 | 0 | 0 | 0 | not significant |
| 4187 | GO_NEGATIVE_REGULATION_OF_PROTEIN_DEPHOSPHORYLATION                 | -0.93 | 0.21 | 0 | 0 | 0 | not significant |
| 4188 | GO_OXIDOREDUCTASE_ACTIVITY_ACTING_ON_NAD_P_H_QUIINONE_OR_SIMILAR_CO | -0.93 | 0.21 | 0 | 0 | 0 | not significant |
| 4189 | GO_U1_SMRNP_BINDING                                                 | -0.93 | 0.21 | 0 | 0 | 0 | not significant |
| 4190 | REACTOME_NONSENSE_MEDIATED_DECAY_NMD                                | -0.93 | 0.21 | 0 | 0 | 0 | not significant |
| 4191 | GO_POSITIVE_REGULATION_OF_CYTOSKELETON_ORGANIZATION                 | -0.93 | 0.2  | 0 | 0 | 0 | not significant |
| 4192 | KEGG_CHEMOKINE_SIGNALING_PATHWAY                                    | -0.93 | 0.2  | 0 | 0 | 0 | not significant |
| 4193 | REACTOME_NUCLEOTIDE_EXCISION_REPAIR                                 | -0.93 | 0.19 | 0 | 0 | 0 | not significant |
| 4194 | GO_CAMERA_TYPE_EYE_DEVELOPMENT                                      | -0.93 | 0.18 | 0 | 0 | 0 | not significant |
| 4195 | THEILGAARD_NEUTROPHIL_AT_SKIN_WOUND_DN                              | -0.93 | 0.18 | 0 | 0 | 0 | not significant |
| 4196 | GO_NEGATIVE_REGULATION_OF_T_CELL_APOPTOTIC_PROCESS                  | -0.92 | 0.26 | 0 | 0 | 0 | not significant |
| 4197 | GO_REGULATION_OF_NON_MOTILE_CILIUM_ASSEMBLY                         | -0.92 | 0.26 | 0 | 0 | 0 | not significant |
| 4198 | GO_TRANSCRIPTION_FACTOR_TFIIF_HOLO_COMPLEX                          | -0.92 | 0.26 | 0 | 0 | 0 | not significant |
| 4199 | REACTOME_ADP_SIGNALING_THROUGH_P2Y_PURINOCEPTOR_1                   | -0.92 | 0.26 | 0 | 0 | 0 | not significant |
| 4200 | WANG_TNF_TARGETS                                                    | -0.92 | 0.26 | 0 | 0 | 0 | not significant |
| 4201 | BIOCARTA_MAL_PATHWAY                                                | -0.92 | 0.25 | 0 | 0 | 0 | not significant |
| 4202 | CHR18Q21                                                            | -0.92 | 0.25 | 0 | 0 | 0 | not significant |
| 4203 | GO_ATTACHMENT_OF_MITOTIC_SPINDLE_MICROTUBULES_TO_KINETOCHORE        | -0.92 | 0.25 | 0 | 0 | 0 | not significant |
| 4204 | GO_CENTRAL_NERVOUS_SYSTEM_PROJECTION_NEURON_AXONEMESIS              | -0.92 | 0.25 | 0 | 0 | 0 | not significant |
| 4205 | GO_PROTEIN_LOCALIZATION_TO_MICROTUBULE                              | -0.92 | 0.25 | 0 | 0 | 0 | not significant |
| 4206 | MATZUK_SPERMATID_DIFFERENTIATION                                    | -0.92 | 0.25 | 0 | 0 | 0 | not significant |
| 4207 | REACTOME_IRAK2_MEDIATED_ACTIVATION_OF_TAK1_COMPLEX                  | -0.92 | 0.25 | 0 | 0 | 0 | not significant |
| 4208 | CHR4Q27                                                             | -0.92 | 0.24 | 0 | 0 | 0 | not significant |
| 4209 | GO_ATF6_MEDIATED_UNFOLDED_PROTEIN_RESPONSE                          | -0.92 | 0.24 | 0 | 0 | 0 | not significant |
| 4210 | GO_CORNIFICATION                                                    | -0.92 | 0.24 | 0 | 0 | 0 | not significant |
| 4211 | GO_ENDODERMAL_CELL_FATE_COMMITMENT                                  | -0.92 | 0.24 | 0 | 0 | 0 | not significant |
| 4212 | GO_HOMEOSTASIS_OF_NUMBER_OF_CELLS_WITHIN_A_TISSUE                   | -0.92 | 0.24 | 0 | 0 | 0 | not significant |
| 4213 | GO_HYPOTONIC_RESPONSE                                               | -0.92 | 0.24 | 0 | 0 | 0 | not significant |
| 4214 | GO_PICLN_SM_PROTEIN_COMPLEX                                         | -0.92 | 0.24 | 0 | 0 | 0 | not significant |
| 4215 | GO_PRIMARY_MIRNA_PROCESSING                                         | -0.92 | 0.24 | 0 | 0 | 0 | not significant |
| 4216 | GO_SERTOLI_CELL_DEVELOPMENT                                         | -0.92 | 0.24 | 0 | 0 | 0 | not significant |
| 4217 | GO_SNAP_RECEPTOR_ACTIVITY                                           | -0.92 | 0.24 | 0 | 0 | 0 | not significant |
| 4218 | KUROKAWA_LIVER_CANCER_CHEMOTHERAPY_DN                               | -0.92 | 0.24 | 0 | 0 | 0 | not significant |
| 4219 | LI_LUNG_CANCER                                                      | -0.92 | 0.24 | 0 | 0 | 0 | not significant |
| 4220 | PID_TRAIL_PATHWAY                                                   | -0.92 | 0.24 | 0 | 0 | 0 | not significant |
| 4221 | PID_VEGFR1_PATHWAY                                                  | -0.92 | 0.24 | 0 | 0 | 0 | not significant |
| 4222 | REACTOME_SYNTHESIS_OF_PIP3_AT_THE_EARLY_ENDOSOME_MEMBRANE           | -0.92 | 0.24 | 0 | 0 | 0 | not significant |
| 4223 | SHIN_B_CELL_LYMPHOMA_CLUSTER_8                                      | -0.92 | 0.24 | 0 | 0 | 0 | not significant |
| 4224 | STONER_ESOPHAGEAL_CARCINOGENESIS_UP                                 | -0.92 | 0.24 | 0 | 0 | 0 | not significant |
| 4225 | SYED_ESTRADIOL_RESPONSE                                             | -0.92 | 0.24 | 0 | 0 | 0 | not significant |
| 4226 | TURASHVILI_BREAST_CARCINOMA_DUCTAL_VS_LOBULAR_UP                    | -0.92 | 0.24 | 0 | 0 | 0 | not significant |
| 4227 | BIOCARTA_CELL2CELL_PATHWAY                                          | -0.92 | 0.23 | 0 | 0 | 0 | not significant |
| 4228 | GO_CELL_COMMUNICATION_BY_ELECTRICAL_COUPLING                        | -0.92 | 0.23 | 0 | 0 | 0 | not significant |
| 4229 | GO_GENERAL_TRANSCRIPTION_INITIATION_FACTOR_ACTIVITY                 | -0.92 | 0.23 | 0 | 0 | 0 | not significant |
| 4230 | GO_HISTONE_H3_K9_DIMETHYLATION                                      | -0.92 | 0.23 | 0 | 0 | 0 | not significant |
| 4231 | GO_NEGATIVE_REGULATION_OF_CELLULAR_PROTEIN_CATABOLIC_PROCESS        | -0.92 | 0.23 | 0 | 0 | 0 | not significant |
| 4232 | GO_NEGATIVE_REGULATION_OF_CYTOSOLIC_CALCIIUM_IION_CONCENTRATION     | -0.92 | 0.23 | 0 | 0 | 0 | not significant |
| 4233 | GO_NEGATIVE_REGULATION_OF_PLATELET_DERIVED_GROWTH_FACTOR_RECEP      | -0.92 | 0.23 | 0 | 0 | 0 | not significant |
| 4234 | GO_PML_BODY_ORGANIZATION                                            | -0.92 | 0.23 | 0 | 0 | 0 | not significant |
| 4235 | GO_POSITIVE_REGULATION_OF_VASCULAR_SMOOTH_MUSCLE_CELL_PROLIFERATION | -0.92 | 0.23 | 0 | 0 | 0 | not significant |
| 4236 | GO_PROTEASOME_CORE_COMPLEX_ALPHA_SUBUNIT_COMPLEX                    | -0.92 | 0.23 | 0 | 0 | 0 | not significant |
| 4237 | GO_REGULATION_OF_ACTIN_FILAMENT_BASED_MOVEMENT                      | -0.92 | 0.23 | 0 | 0 | 0 | not significant |
| 4238 | GO_REGULATION_OF_TRANSCRIPTION_FROM_RNA_POLYMERASE_II_PROMOTER      | -0.92 | 0.23 | 0 | 0 | 0 | not significant |
| 4239 | GO_TRANSCRIPTION_DEPENDENT_TETHERING_OF_RNA_POLYMERASE_II_GENE_D    | -0.92 | 0.23 | 0 | 0 | 0 | not significant |

|      |                                                                   |       |      |   |   |   |                 |
|------|-------------------------------------------------------------------|-------|------|---|---|---|-----------------|
| 4240 | KYNG_ENVIRONMENTAL_STRESS_RESPONSE_NOT_BY_4NQO_IN_WIS             | -0.92 | 0.23 | 0 | 0 | 0 | not significant |
| 4241 | MATZUK_SPERMATOCYTE                                               | -0.92 | 0.23 | 0 | 0 | 0 | not significant |
| 4242 | REACTOME_KERATINIZATION                                           | -0.92 | 0.23 | 0 | 0 | 0 | not significant |
| 4243 | WANG_ESOPHAGUS_CANCER_PROGRESSION_UP                              | -0.92 | 0.23 | 0 | 0 | 0 | not significant |
| 4244 | WOTTON_RUNX_TARGETS_DN                                            | -0.92 | 0.23 | 0 | 0 | 0 | not significant |
| 4245 | YANG_BREAST_CANCER_ESR1_BULK_DN                                   | -0.92 | 0.23 | 0 | 0 | 0 | not significant |
| 4246 | AKL_HTLV1_INFECTION_UP                                            | -0.92 | 0.22 | 0 | 0 | 0 | not significant |
| 4247 | GO_DNA_POLYMERASE_ACTIVITY                                        | -0.92 | 0.22 | 0 | 0 | 0 | not significant |
| 4248 | GO_SMALL_PROTEIN_ACTIVATING_ENZYME_BINDING                        | -0.92 | 0.22 | 0 | 0 | 0 | not significant |
| 4249 | KEGG_LONG_TERM_DEPRESSION                                         | -0.92 | 0.22 | 0 | 0 | 0 | not significant |
| 4250 | LUI_THYROID_CANCER_CLUSTER_5                                      | -0.92 | 0.22 | 0 | 0 | 0 | not significant |
| 4251 | REACTOME_PERK_REGULATES_GENE_EXPRESSION                           | -0.92 | 0.22 | 0 | 0 | 0 | not significant |
| 4252 | REACTOME_TRANSCRIPTION_COUPLED_NUCLEOTIDE_EXCISION_REPAIR_TC_NER  | -0.92 | 0.2  | 0 | 0 | 0 | not significant |
| 4253 | GO_NUCLEAR_TRANSCRIBED_MRNA_CATABOLIC_PROCESS_DEADENYLATION_DEF   | -0.92 | 0.19 | 0 | 0 | 0 | not significant |
| 4254 | GO_NUCLEAR_TRANSCRIBED_MRNA_CATABOLIC_PROCESS_NONSENSE_MEDIATEE   | -0.92 | 0.19 | 0 | 0 | 0 | not significant |
| 4255 | REACTOME_HATS_ACETYLATE_HISTONES                                  | -0.92 | 0.19 | 0 | 0 | 0 | not significant |
| 4256 | TAYLOR_METHYLATED_IN_ACUTE_LYMPHOBLASTIC_LEUKEMIA                 | -0.92 | 0.19 | 0 | 0 | 0 | not significant |
| 4257 | GO_CYTOSOLIC_TRANSPORT                                            | -0.92 | 0.18 | 0 | 0 | 0 | not significant |
| 4258 | REACTOME_PRE_NOTCH_EXPRESSION_AND_PROCESSING                      | -0.92 | 0.18 | 0 | 0 | 0 | not significant |
| 4259 | KEGG_REGULATION_OF_ACTIN_CYTOSKELETON                             | -0.92 | 0.17 | 0 | 0 | 0 | not significant |
| 4260 | GO_STRUCTURAL_CONSTITUENT_OF_RIBOSOME                             | -0.92 | 0.15 | 0 | 0 | 0 | not significant |
| 4261 | GO_GLUTAMATERGIC_SYNAPSE                                          | -0.92 | 0.13 | 0 | 0 | 0 | not significant |
| 4262 | GO_MEMBRANE_DOCKING                                               | -0.92 | 0.11 | 0 | 0 | 0 | not significant |
| 4263 | BRUINS_UVC_RESPONSE_LATE                                          | -0.92 | 0.04 | 0 | 0 | 0 | not significant |
| 4264 | GO_POSITIVE_REGULATION_OF_PROTEIN_SUMOYLATION                     | -0.91 | 0.25 | 0 | 0 | 0 | not significant |
| 4265 | GO_RESPIRATORY_GASEOUS_EXCHANGE                                   | -0.91 | 0.25 | 0 | 0 | 0 | not significant |
| 4266 | REACTOME_ERYTHROPOIETIN_ACTIVATES_RAS                             | -0.91 | 0.25 | 0 | 0 | 0 | not significant |
| 4267 | REACTOME_FORMATION_OF_THE_CORNIFIED_ENVELOPE                      | -0.91 | 0.25 | 0 | 0 | 0 | not significant |
| 4268 | GO_ACTIVATION_OF_NF_KAPPAB_INDUCING_KINASE_ACTIVITY               | -0.91 | 0.24 | 0 | 0 | 0 | not significant |
| 4269 | GO_AMYLOID_FIBRIL_FORMATION                                       | -0.91 | 0.24 | 0 | 0 | 0 | not significant |
| 4270 | GO_INTERLEUKIN_12_BIOSYNTHETIC_PROCESS                            | -0.91 | 0.24 | 0 | 0 | 0 | not significant |
| 4271 | GO_NEDD8_SPECIFIC_PROTEASE_ACTIVITY                               | -0.91 | 0.24 | 0 | 0 | 0 | not significant |
| 4272 | GO_POSITIVE_REGULATION_OF_NEUTROPHIL_MIGRATION                    | -0.91 | 0.24 | 0 | 0 | 0 | not significant |
| 4273 | GO_PRESYNAPTIC_MEMBRANE_ASSEMBLY                                  | -0.91 | 0.24 | 0 | 0 | 0 | not significant |
| 4274 | PID_MYC_PATHWAY                                                   | -0.91 | 0.24 | 0 | 0 | 0 | not significant |
| 4275 | URS_ADIPOCYTE_DIFFERENTIATION_DN                                  | -0.91 | 0.24 | 0 | 0 | 0 | not significant |
| 4276 | GO_JUN_KINASE_KINASE_ACTIVITY                                     | -0.91 | 0.23 | 0 | 0 | 0 | not significant |
| 4277 | GO_MYOBLAST_DIFFERENTIATION                                       | -0.91 | 0.23 | 0 | 0 | 0 | not significant |
| 4278 | GO_REGULATION_OF_ENDOSOME_SIZE                                    | -0.91 | 0.23 | 0 | 0 | 0 | not significant |
| 4279 | GO_REGULATION_OF_PANCREATIC_JUICE_SECRETION                       | -0.91 | 0.23 | 0 | 0 | 0 | not significant |
| 4280 | GO_V_D_J_RECOMBINATION                                            | -0.91 | 0.23 | 0 | 0 | 0 | not significant |
| 4281 | IKEDA_MIR1_TARGETS_UP                                             | -0.91 | 0.23 | 0 | 0 | 0 | not significant |
| 4282 | NIELSEN_LEIOMYOSARCOMA_UP                                         | -0.91 | 0.23 | 0 | 0 | 0 | not significant |
| 4283 | REACTOME_EGFR_DOWNREGULATION                                      | -0.91 | 0.23 | 0 | 0 | 0 | not significant |
| 4284 | REACTOME_GLUCCONEOGENESIS                                         | -0.91 | 0.23 | 0 | 0 | 0 | not significant |
| 4285 | WEST_ADRENOCORTICAL_CARCINOMA_VS_ADENOMA_DN                       | -0.91 | 0.23 | 0 | 0 | 0 | not significant |
| 4286 | GAUTSCHI_SRC_SIGNALING                                            | -0.91 | 0.22 | 0 | 0 | 0 | not significant |
| 4287 | GO_FORMATION_OF_CYTOPLASMIC_TRANSLATION_INITIATION_COMPLEX        | -0.91 | 0.22 | 0 | 0 | 0 | not significant |
| 4288 | GO_INTERLEUKIN_23_PRODUCTION                                      | -0.91 | 0.22 | 0 | 0 | 0 | not significant |
| 4289 | GO_LACTATION                                                      | -0.91 | 0.22 | 0 | 0 | 0 | not significant |
| 4290 | GO_MACROPHAGE_DIFFERENTIATION                                     | -0.91 | 0.22 | 0 | 0 | 0 | not significant |
| 4291 | GO_PHOSPHATIDYLINOSITOL_3_KINASE_COMPLEX_CLASS_III                | -0.91 | 0.22 | 0 | 0 | 0 | not significant |
| 4292 | GO_POSITIVE_REGULATION_OF_RECEPTOR_SIGNALING_PATHWAY_VIA_STAT     | -0.91 | 0.22 | 0 | 0 | 0 | not significant |
| 4293 | GO_PYRIMIDINE_NUCLEOSIDE_TRIPHOSPHATE_BIOSYNTHETIC_PROCESS        | -0.91 | 0.22 | 0 | 0 | 0 | not significant |
| 4294 | GO_RRNA_ADENINE_METHYLTRANSFERASE_ACTIVITY                        | -0.91 | 0.22 | 0 | 0 | 0 | not significant |
| 4295 | PID_EPHRINB_REV_PATHWAY                                           | -0.91 | 0.22 | 0 | 0 | 0 | not significant |
| 4296 | REACTOME_METALLOTHIONEINS_BIND_METALS                             | -0.91 | 0.22 | 0 | 0 | 0 | not significant |
| 4297 | ROVERSI_GLIOMA_COPY_NUMBER_DN                                     | -0.91 | 0.22 | 0 | 0 | 0 | not significant |
| 4298 | WENDT_COHESIN_TARGETS_UP                                          | -0.91 | 0.22 | 0 | 0 | 0 | not significant |
| 4299 | GO_AP_TYPE_MEMBRANE_COAT_ADAPTOR_COMPLEX                          | -0.91 | 0.21 | 0 | 0 | 0 | not significant |
| 4300 | TIEN_INTESTINE_PROBIOTICS_6HR_UP                                  | -0.91 | 0.21 | 0 | 0 | 0 | not significant |
| 4301 | CHR2Q37                                                           | -0.91 | 0.2  | 0 | 0 | 0 | not significant |
| 4302 | FALVELLA_SMOKERS_WITH_LUNG_CANCER                                 | -0.91 | 0.2  | 0 | 0 | 0 | not significant |
| 4303 | GO_POSITIVE_REGULATION_OF_GLUCCOKINASE_ACTIVITY                   | -0.91 | 0.2  | 0 | 0 | 0 | not significant |
| 4304 | GO_RUFFLE_ORGANIZATION                                            | -0.91 | 0.2  | 0 | 0 | 0 | not significant |
| 4305 | BOYLAN_MULTIPLE_MYELOMA_D_UP                                      | -0.91 | 0.19 | 0 | 0 | 0 | not significant |
| 4306 | REACTOME_TRANS_GOLGI_NETWORK_VESICLE_BUDDING                      | -0.91 | 0.19 | 0 | 0 | 0 | not significant |
| 4307 | CHR1Q32                                                           | -0.91 | 0.18 | 0 | 0 | 0 | not significant |
| 4308 | GO_RESPONSE_TO_VITAMIN                                            | -0.91 | 0.18 | 0 | 0 | 0 | not significant |
| 4309 | BROWNE_HCMV_INFECTION_12HR_DN                                     | -0.91 | 0.17 | 0 | 0 | 0 | not significant |
| 4310 | GO_DNA_DEPENDENT_ATPASE_ACTIVITY                                  | -0.91 | 0.17 | 0 | 0 | 0 | not significant |
| 4311 | KIM_WT1_TARGETS_8HR_DN                                            | -0.91 | 0.17 | 0 | 0 | 0 | not significant |
| 4312 | LIN_NPAS4_TARGETS_UP                                              | -0.91 | 0.17 | 0 | 0 | 0 | not significant |
| 4313 | REACTOME_SUMOYLATION_OF_DNA_DAMAGE_RESPONSE_AND_REPAIR_PROTEIN    | -0.91 | 0.17 | 0 | 0 | 0 | not significant |
| 4314 | GO_CELLULAR_TRANSITION_METAL_ION_HOMEOSTASIS                      | -0.91 | 0.16 | 0 | 0 | 0 | not significant |
| 4315 | GO_NUCLEAR_TRANSCRIBED_MRNA_CATABOLIC_PROCESS                     | -0.91 | 0.12 | 0 | 0 | 0 | not significant |
| 4316 | RATTENBACHER_BOUND_BY_CELF1                                       | -0.91 | 0.1  | 0 | 0 | 0 | not significant |
| 4317 | GO_ACTIN_CYTOSKELETON                                             | -0.91 | 0.09 | 0 | 0 | 0 | not significant |
| 4318 | BOYALTY_LIVER_CANCER_SUBCLASS_G56_DN                              | -0.90 | 0.24 | 0 | 0 | 0 | not significant |
| 4319 | GO_MAINTENANCE_OF_SISTER_CHROMATID_COHESION                       | -0.90 | 0.24 | 0 | 0 | 0 | not significant |
| 4320 | GO_GUANYL_NUCLEOTIDE_EXCHANGE_FACTOR_COMPLEX                      | -0.90 | 0.23 | 0 | 0 | 0 | not significant |
| 4321 | GO_NEGATIVE_REGULATION_OF_CELL_GROWTH_INVOLVED_IN_CARDIAC_MUSCLE  | -0.90 | 0.23 | 0 | 0 | 0 | not significant |
| 4322 | GO_POSITIVE_REGULATION_OF_SODIUM_ION_TRANSPORT                    | -0.90 | 0.23 | 0 | 0 | 0 | not significant |
| 4323 | HEDENFALK_BREAST_CANCER_BRACX_DN                                  | -0.90 | 0.23 | 0 | 0 | 0 | not significant |
| 4324 | PID_INSULIN_GLUCCOSE_PATHWAY                                      | -0.90 | 0.23 | 0 | 0 | 0 | not significant |
| 4325 | REACTOME_CELL_EXTRACELLULAR_MATRIX_INTERACTIONS                   | -0.90 | 0.23 | 0 | 0 | 0 | not significant |
| 4326 | REACTOME_SIGNALING_BY_TGF_BETA_RECEPTOR_COMPLEX_IN_CANCER         | -0.90 | 0.23 | 0 | 0 | 0 | not significant |
| 4327 | ZHAN_LATE_DIFFERENTIATION_GENES_DN                                | -0.90 | 0.23 | 0 | 0 | 0 | not significant |
| 4328 | GO_EMBRYONIC_PLACENTA_MORPHOGENESIS                               | -0.90 | 0.22 | 0 | 0 | 0 | not significant |
| 4329 | GO_METANEPHRIC_NEPHRON_EPITHELIUM_DEVELOPMENT                     | -0.90 | 0.22 | 0 | 0 | 0 | not significant |
| 4330 | GO_MITOCHONDRION_LOCALIZATION                                     | -0.90 | 0.22 | 0 | 0 | 0 | not significant |
| 4331 | GO_NEGATIVE_REGULATION_OF_PRODUCTION_OF_MIRNAS_INVOLVED_IN_GENE_S | -0.90 | 0.22 | 0 | 0 | 0 | not significant |
| 4332 | GO_NEGATIVE_REGULATION_OF_PROTEIN_KINASE_B_SIGNALING              | -0.90 | 0.22 | 0 | 0 | 0 | not significant |
| 4333 | GO_NEGATIVE_REGULATION_OF_STRIATED_MUSCLE_CELL_APOPTOTIC_PROCES   | -0.90 | 0.22 | 0 | 0 | 0 | not significant |
| 4334 | GO_POSITIVE_REGULATION_OF_EPITHELIAL_CELL_DIFFERENTIATION         | -0.90 | 0.22 | 0 | 0 | 0 | not significant |
| 4335 | GO_RDNA_BINDING                                                   | -0.90 | 0.22 | 0 | 0 | 0 | not significant |
| 4336 | GO_REGULATION_OF_MRNA_BINDING                                     | -0.90 | 0.22 | 0 | 0 | 0 | not significant |
| 4337 | GO_REGULATION_OF_THE_FORCE_OF_HEART_CONTRACTION                   | -0.90 | 0.22 | 0 | 0 | 0 | not significant |
| 4338 | GO_SUPERCOILED_DNA_BINDING                                        | -0.90 | 0.22 | 0 | 0 | 0 | not significant |
| 4339 | KEGG_TASTE_TRANSDUCTION                                           | -0.90 | 0.22 | 0 | 0 | 0 | not significant |
| 4340 | NIKOLSKY_BREAST_CANCER_12Q13_Q21_AMPLICON                         | -0.90 | 0.22 | 0 | 0 | 0 | not significant |
| 4341 | NIKOLSKY_BREAST_CANCER_15Q26_AMPLICON                             | -0.90 | 0.22 | 0 | 0 | 0 | not significant |
| 4342 | POMEROY_MEDULLOBLASTOMA_PROGNOSIS_DN                              | -0.90 | 0.22 | 0 | 0 | 0 | not significant |
| 4343 | CHR16Q23                                                          | -0.90 | 0.21 | 0 | 0 | 0 | not significant |
| 4344 | GENTLES_LEUKEMIC_STEM_CELL_DN                                     | -0.90 | 0.21 | 0 | 0 | 0 | not significant |
| 4345 | GO_NEGATIVE_REGULATION_OF_HORMONE_SECRETION                       | -0.90 | 0.21 | 0 | 0 | 0 | not significant |
| 4346 | GO_POSITIVE_REGULATION_OF_MITOTIC_SISTER_CHROMATID_SEPARATION     | -0.90 | 0.21 | 0 | 0 | 0 | not significant |
| 4347 | GO_POSITIVE_REGULATION_OF_RIG_I_SIGNALING_PATHWAY                 | -0.90 | 0.21 | 0 | 0 | 0 | not significant |
| 4348 | GO_PROTEIN_K48_LINKED_UBQUITINATION                               | -0.90 | 0.21 | 0 | 0 | 0 | not significant |

|      |                                                                  |       |      |   |   |   |                 |
|------|------------------------------------------------------------------|-------|------|---|---|---|-----------------|
| 4349 | HOFMANN_MYELODYSPLASTIC_SYNDROM_HIGH_RISK_UP                     | -0.90 | 0.21 | 0 | 0 | 0 | not significant |
| 4350 | HOLLERN_SQUAMOUS_BREAST_TUMOR                                    | -0.90 | 0.21 | 0 | 0 | 0 | not significant |
| 4351 | KONDO_PROSTATE_CANCER_WITH_H3K27ME3                              | -0.90 | 0.21 | 0 | 0 | 0 | not significant |
| 4352 | MYLLYKANGAS_AMPLIFICATION_HOT_SPOT_2                             | -0.90 | 0.21 | 0 | 0 | 0 | not significant |
| 4353 | REACTOME_INTERLEUKIN_12_FAMILY_SIGNALING                         | -0.90 | 0.21 | 0 | 0 | 0 | not significant |
| 4354 | ZHANG_ANTIVIRAL_RESPONSE_TO_RIBAVIRIN_DN                         | -0.90 | 0.21 | 0 | 0 | 0 | not significant |
| 4355 | BIOCARTA_FMLP_PATHWAY                                            | -0.90 | 0.2  | 0 | 0 | 0 | not significant |
| 4356 | GO_ASYMMETRIC_STEM_CELL_DIVISION                                 | -0.90 | 0.2  | 0 | 0 | 0 | not significant |
| 4357 | GO_PANTOTHENATE_METABOLIC_PROCESS                                | -0.90 | 0.2  | 0 | 0 | 0 | not significant |
| 4358 | GO_POSITIVE_REGULATION_OF_DENDRITIC_SPINE_DEVELOPMENT            | -0.90 | 0.2  | 0 | 0 | 0 | not significant |
| 4359 | GO_TELOMERE_CAPPING                                              | -0.90 | 0.2  | 0 | 0 | 0 | not significant |
| 4360 | KANNAN_TP53_TARGETS_UP                                           | -0.90 | 0.2  | 0 | 0 | 0 | not significant |
| 4361 | KEGG_ACUTE_MYELOID_LEUKEMIA                                      | -0.90 | 0.2  | 0 | 0 | 0 | not significant |
| 4362 | OUILLETTE_CLL_13Q14_DELETION_DN                                  | -0.90 | 0.2  | 0 | 0 | 0 | not significant |
| 4363 | CHR12Q23                                                         | -0.90 | 0.19 | 0 | 0 | 0 | not significant |
| 4364 | CHR17Q12                                                         | -0.90 | 0.19 | 0 | 0 | 0 | not significant |
| 4365 | GO_CLATHRIN_COATED_PIT                                           | -0.90 | 0.19 | 0 | 0 | 0 | not significant |
| 4366 | GO_REGULATION_OF_SYNAPTIC_VESICLE_TRANSPORT                      | -0.90 | 0.19 | 0 | 0 | 0 | not significant |
| 4367 | KEGG_ADHERENS_JUNCTION                                           | -0.90 | 0.19 | 0 | 0 | 0 | not significant |
| 4368 | REACTOME_BBSOME_MEDIATED_CARGO_TARGETING_TO_CILIUM               | -0.90 | 0.19 | 0 | 0 | 0 | not significant |
| 4369 | CHR7Q11                                                          | -0.90 | 0.18 | 0 | 0 | 0 | not significant |
| 4370 | GO_NEGATIVE_REGULATION_OF_PROTEIN_POLYMERIZATION                 | -0.90 | 0.18 | 0 | 0 | 0 | not significant |
| 4371 | GO_PROTEIN_INSERTION_INTO_MITOCHONDRIAL_MEMBRANE                 | -0.90 | 0.18 | 0 | 0 | 0 | not significant |
| 4372 | GO_HINDBRAIN_DEVELOPMENT                                         | -0.90 | 0.17 | 0 | 0 | 0 | not significant |
| 4373 | GO_G_PROTEIN_COUPLED_RECEPTOR_BINDING                            | -0.90 | 0.16 | 0 | 0 | 0 | not significant |
| 4374 | GO_PROTEIN_METHYLTRANSFERASE_ACTIVITY                            | -0.90 | 0.16 | 0 | 0 | 0 | not significant |
| 4375 | PDGF_ERK_DNV1_UP                                                 | -0.90 | 0.16 | 0 | 0 | 0 | not significant |
| 4376 | LINDGREN_BLADDER_CANCER_CLUSTER_1_UP                             | -0.90 | 0.15 | 0 | 0 | 0 | not significant |
| 4377 | KEGG_ALZHEIMERS_DISEASE                                          | -0.90 | 0.13 | 0 | 0 | 0 | not significant |
| 4378 | GO_VESICLE_LOCALIZATION                                          | -0.90 | 0.11 | 0 | 0 | 0 | not significant |
| 4379 | GO_CELL_SUBSTRATE_JUNCTION                                       | -0.90 | 0.06 | 0 | 0 | 0 | not significant |
| 4380 | GO_REGULATION_OF_MULTI_ORGANISM_PROCESS                          | -0.90 | 0.06 | 0 | 0 | 0 | not significant |
| 4381 | GO_COPPER_ION_TRANSPORT                                          | -0.89 | 0.23 | 0 | 0 | 0 | not significant |
| 4382 | GO_ESTABLISHMENT_OF_SISTER_CHROMATID_COHESION                    | -0.89 | 0.23 | 0 | 0 | 0 | not significant |
| 4383 | GO_OVULATION_CYCLE_PROCESS                                       | -0.89 | 0.23 | 0 | 0 | 0 | not significant |
| 4384 | DORMOY_ELAVL1_TARGETS                                            | -0.89 | 0.22 | 0 | 0 | 0 | not significant |
| 4385 | GO_EMBRYONIC_CAMERA_TYPE_EYE_FORMATION                           | -0.89 | 0.22 | 0 | 0 | 0 | not significant |
| 4386 | GO_POSITIVE_REGULATION_OF_TELOMERE_CAPPING                       | -0.89 | 0.22 | 0 | 0 | 0 | not significant |
| 4387 | GO_RECEPTOR_BIOSYNTHETIC_PROCESS                                 | -0.89 | 0.22 | 0 | 0 | 0 | not significant |
| 4388 | GO_VOLUNTARY_MUSCULOSKELETAL_MOVEMENT                            | -0.89 | 0.22 | 0 | 0 | 0 | not significant |
| 4389 | REACTOME_CLEC7A_DECTIN_1_INDUCES_NFAT_ACTIVATION                 | -0.89 | 0.22 | 0 | 0 | 0 | not significant |
| 4390 | WILLIAMS_ESR2_TARGETS_UP                                         | -0.89 | 0.22 | 0 | 0 | 0 | not significant |
| 4391 | GO_CELLULAR_RESPONSE_TO_ELECTRICAL_STIMULUS                      | -0.89 | 0.21 | 0 | 0 | 0 | not significant |
| 4392 | GO_CENTRIOLAR_SATELLITE                                          | -0.89 | 0.21 | 0 | 0 | 0 | not significant |
| 4393 | GO_CHEMOKINE_C_C_MOTIF_LIGAND_5_PRODUCTION                       | -0.89 | 0.21 | 0 | 0 | 0 | not significant |
| 4394 | GO_CILIARY_ROOTLET                                               | -0.89 | 0.21 | 0 | 0 | 0 | not significant |
| 4395 | GO_ER_MEMBRANE_INSERTION_COMPLEX                                 | -0.89 | 0.21 | 0 | 0 | 0 | not significant |
| 4396 | GO_MITOGEN_ACTIVATED_PROTEIN_KINASE_KINASE_BINDING               | -0.89 | 0.21 | 0 | 0 | 0 | not significant |
| 4397 | GO_N_TERMINAL_PROTEIN_AMINO_ACID_ACETYLTATION                    | -0.89 | 0.21 | 0 | 0 | 0 | not significant |
| 4398 | GO_POSITIVE_REGULATION_OF_ACTIN_CYTOSKELETON_REORGANIZATION      | -0.89 | 0.21 | 0 | 0 | 0 | not significant |
| 4399 | GO_POSITIVE_REGULATION_OF_SUPEROXIDE_ANION_GENERATION            | -0.89 | 0.21 | 0 | 0 | 0 | not significant |
| 4400 | GO_PREFOLDIN_COMPLEX                                             | -0.89 | 0.21 | 0 | 0 | 0 | not significant |
| 4401 | GO_REGULATION_OF_CYTOPLASMIC_TRANSLATION                         | -0.89 | 0.21 | 0 | 0 | 0 | not significant |
| 4402 | GO_REGULATION_OF_RECEPTOR_BIOSYNTHETIC_PROCESS                   | -0.89 | 0.21 | 0 | 0 | 0 | not significant |
| 4403 | HOFMANN_MYELODYSPLASTIC_SYNDROM_RISK_DN                          | -0.89 | 0.21 | 0 | 0 | 0 | not significant |
| 4404 | KORKOLA_EMBRYONIC_CARCINOMA_VS_SEMINOMA_UP                       | -0.89 | 0.21 | 0 | 0 | 0 | not significant |
| 4405 | NIELSEN_SCHWANNOMA_UP                                            | -0.89 | 0.21 | 0 | 0 | 0 | not significant |
| 4406 | PID_ARF6_DOWNSTREAM_PATHWAY                                      | -0.89 | 0.21 | 0 | 0 | 0 | not significant |
| 4407 | PID_SYNDECAN_2_PATHWAY                                           | -0.89 | 0.21 | 0 | 0 | 0 | not significant |
| 4408 | REACTOME_PROCESSING_AND_ACTIVATION_OF_SUMO                       | -0.89 | 0.21 | 0 | 0 | 0 | not significant |
| 4409 | GO_NUCLEOSIDE_MONOPHOSPHATE_METABOLIC_PROCESS                    | -0.89 | 0.2  | 0 | 0 | 0 | not significant |
| 4410 | GO_NUCLEOSIDE_MONOPHOSPHATE_PHOSPHORYLTATION                     | -0.89 | 0.2  | 0 | 0 | 0 | not significant |
| 4411 | GO_PIGMENT_CELL_DIFFERENTIATION                                  | -0.89 | 0.2  | 0 | 0 | 0 | not significant |
| 4412 | GO_REGULATION_OF_AMINO_ACID_IMPORT_ACROSS_PLASMA_MEMBRANE        | -0.89 | 0.2  | 0 | 0 | 0 | not significant |
| 4413 | GO_REGULATION_OF_CD8_POSITIVE_ALPHA_BETA_T_CELL_DIFFERENTIATION  | -0.89 | 0.2  | 0 | 0 | 0 | not significant |
| 4414 | REACTOME_ROLE_OF_LAT2_NTAL_LAB_ON_CALCIIUM_MOBILIZATION          | -0.89 | 0.2  | 0 | 0 | 0 | not significant |
| 4415 | TAVAZOIE_METASTASIS                                              | -0.89 | 0.2  | 0 | 0 | 0 | not significant |
| 4416 | TURASHVILI_BREAST_NORMAL_DUCTAL_VS_LOBULAR_UP                    | -0.89 | 0.2  | 0 | 0 | 0 | not significant |
| 4417 | YOSHIOKA_LIVER_CANCER_EARLY_RECURRENCE_UP                        | -0.89 | 0.2  | 0 | 0 | 0 | not significant |
| 4418 | GO_CELLULAR_RESPONSE_TO_OSMOTIC_STRESS                           | -0.89 | 0.19 | 0 | 0 | 0 | not significant |
| 4419 | GO_INTRACELLULAR_ESTROGEN_RECEPTOR_SIGNALING_PATHWAY             | -0.89 | 0.19 | 0 | 0 | 0 | not significant |
| 4420 | GO_NEGATIVE_REGULATION_OF_MACROAUTOPHAGY                         | -0.89 | 0.19 | 0 | 0 | 0 | not significant |
| 4421 | GO_PHOTORECEPTOR_INNER_SEGMENT                                   | -0.89 | 0.19 | 0 | 0 | 0 | not significant |
| 4422 | MARTINEZ_RESPONSE_TO TRABECTEDIN                                 | -0.89 | 0.19 | 0 | 0 | 0 | not significant |
| 4423 | REACTOME_REGULATION_OF_TP53_ACTIVITY_THROUGH_ACETYLTATION        | -0.89 | 0.19 | 0 | 0 | 0 | not significant |
| 4424 | TAVOR_CEBPA_TARGETS_UP                                           | -0.89 | 0.19 | 0 | 0 | 0 | not significant |
| 4425 | GO_INOSITOL_PHOSPHATE_METABOLIC_PROCESS                          | -0.89 | 0.18 | 0 | 0 | 0 | not significant |
| 4426 | GO_POSITIVE_REGULATION_OF_CELL_CYCLE_G2_M_PHASE_TRANSITION       | -0.89 | 0.18 | 0 | 0 | 0 | not significant |
| 4427 | KUMAR_AUTOPHAGY_NETWORK                                          | -0.89 | 0.18 | 0 | 0 | 0 | not significant |
| 4428 | PELLICCIOTTA_HDAC_IN_ANTIGEN_PRESENTATION_DN                     | -0.89 | 0.18 | 0 | 0 | 0 | not significant |
| 4429 | WALLACE_PROSTATE_CANCER_RACE_DN                                  | -0.89 | 0.18 | 0 | 0 | 0 | not significant |
| 4430 | CHR20P13                                                         | -0.89 | 0.17 | 0 | 0 | 0 | not significant |
| 4431 | GO_CARDIAC_MUSCLE_CONTRACTION                                    | -0.89 | 0.17 | 0 | 0 | 0 | not significant |
| 4432 | GO_CILIARY_PLASM                                                 | -0.89 | 0.17 | 0 | 0 | 0 | not significant |
| 4433 | GO_POSITIVE_REGULATION_OF_ORGANELLE_ASSEMBLY                     | -0.89 | 0.17 | 0 | 0 | 0 | not significant |
| 4434 | GO_REGULATION_OF_LIPID_KINASE_ACTIVITY                           | -0.89 | 0.17 | 0 | 0 | 0 | not significant |
| 4435 | GO_CARDIAC_VENTRICLE_DEVELOPMENT                                 | -0.89 | 0.16 | 0 | 0 | 0 | not significant |
| 4436 | GO_RELEASE_OF_CYTOCHROME_C_FROM_MITOCHONDRIA                     | -0.89 | 0.15 | 0 | 0 | 0 | not significant |
| 4437 | GO_RESPIRATORY_CHAIN_COMPLEX                                     | -0.89 | 0.15 | 0 | 0 | 0 | not significant |
| 4438 | GO_TUBE_CLOSURE                                                  | -0.89 | 0.15 | 0 | 0 | 0 | not significant |
| 4439 | KEGG_FC_GAMMA_R_MEDIATED_PHAGOCYTOSIS                            | -0.89 | 0.15 | 0 | 0 | 0 | not significant |
| 4440 | REACTOME_CARGO_RECOGNITION_FOR_CLATHRIN_MEDIATED_ENDOCYTOSIS     | -0.89 | 0.15 | 0 | 0 | 0 | not significant |
| 4441 | GO_POST_GOLGI_VESICLE_MEDIATED_TRANSPORT                         | -0.89 | 0.13 | 0 | 0 | 0 | not significant |
| 4442 | GO_PPTIDYL_LYSINE_ACETYLTATION                                   | -0.89 | 0.09 | 0 | 0 | 0 | not significant |
| 4443 | MYLLYKANGAS_AMPLIFICATION_HOT_SPOT_22                            | -0.88 | 0.22 | 0 | 0 | 0 | not significant |
| 4444 | GO_ESCRT_I_COMPLEX                                               | -0.88 | 0.21 | 0 | 0 | 0 | not significant |
| 4445 | GO_ESTABLISHMENT_OR_MAINTENANCE_OF_MONOPOLAR_CELL_POLARITY       | -0.88 | 0.21 | 0 | 0 | 0 | not significant |
| 4446 | GO_FILAMENTOUS_ACTIN                                             | -0.88 | 0.21 | 0 | 0 | 0 | not significant |
| 4447 | GO_INTERLEUKIN_2_SECRETION                                       | -0.88 | 0.21 | 0 | 0 | 0 | not significant |
| 4448 | GO_NUCLEAR_PERICENTRIC_HETEROCHROMATIN                           | -0.88 | 0.21 | 0 | 0 | 0 | not significant |
| 4449 | GO_POSITIVE_REGULATION_OF_AMINE_TRANSPORT                        | -0.88 | 0.21 | 0 | 0 | 0 | not significant |
| 4450 | GO_RESPONSE_TO_LEAD_ION                                          | -0.88 | 0.21 | 0 | 0 | 0 | not significant |
| 4451 | GO_ZINC_ION_IMPORT_ACROSS_PLASMA_MEMBRANE                        | -0.88 | 0.21 | 0 | 0 | 0 | not significant |
| 4452 | REACTOME_ENDOGENOUS_STEROLS                                      | -0.88 | 0.21 | 0 | 0 | 0 | not significant |
| 4453 | CHESLER_BRAIN_QTL_TRANS                                          | -0.88 | 0.2  | 0 | 0 | 0 | not significant |
| 4454 | CHR4Q24                                                          | -0.88 | 0.2  | 0 | 0 | 0 | not significant |
| 4455 | GO_INSULIN_RECEPTOR_BINDING                                      | -0.88 | 0.2  | 0 | 0 | 0 | not significant |
| 4456 | GO_MITOGEN_ACTIVATED_PROTEIN_KINASE_BINDING                      | -0.88 | 0.2  | 0 | 0 | 0 | not significant |
| 4457 | GO_NUCLEAR_TRANSCRIBED_MRNA_CATABOLIC_PROCESS_DEADENYLATION_INDI | -0.88 | 0.2  | 0 | 0 | 0 | not significant |

|      |                                                                  |       |      |   |   |   |                 |
|------|------------------------------------------------------------------|-------|------|---|---|---|-----------------|
| 4458 | GO_PHOSPHATIDYLINOSITOL_PHOSPHORYLATION                          | -0.88 | 0.2  | 0 | 0 | 0 | not significant |
| 4459 | GO_REGULATION_OF_SYNAPTIC_VESICLE_CLUSTERING                     | -0.88 | 0.2  | 0 | 0 | 0 | not significant |
| 4460 | GO_SINGLE_STRANDED_DNA_DEPENDENT_ATPASE_ACTIVITY                 | -0.88 | 0.2  | 0 | 0 | 0 | not significant |
| 4461 | GO_TELOMERE_CAP_COMPLEX                                          | -0.88 | 0.2  | 0 | 0 | 0 | not significant |
| 4462 | GO_TRANSCRIPTION_EXPORT_COMPLEX                                  | -0.88 | 0.2  | 0 | 0 | 0 | not significant |
| 4463 | GO_VESICLE_CARGO_LOADING                                         | -0.88 | 0.2  | 0 | 0 | 0 | not significant |
| 4464 | MUELLER_COMMON_TARGETS_OF_AML_FUSIONS_UP                         | -0.88 | 0.2  | 0 | 0 | 0 | not significant |
| 4465 | REACTOME_INLB_MEDIATED_ENTRY_OF_LISTERIA_MONOCYTOGENES_INFO_HOST | -0.88 | 0.2  | 0 | 0 | 0 | not significant |
| 4466 | VANDESLUIS_COMMD1_TARGETS_GROUP_4_UP                             | -0.88 | 0.2  | 0 | 0 | 0 | not significant |
| 4467 | GO_ENDOPLASMIC_RETICULUM_TUBULAR_NETWORK                         | -0.88 | 0.19 | 0 | 0 | 0 | not significant |
| 4468 | GO_NEURON_PROJECTION_MEMBRANE                                    | -0.88 | 0.19 | 0 | 0 | 0 | not significant |
| 4469 | GO_REGULATION_OF_CARTILAGE_DEVELOPMENT                           | -0.88 | 0.19 | 0 | 0 | 0 | not significant |
| 4470 | GO_REGULATION_OF_INTEGRIN_MEDIATED_SIGNALING_PATHWAY             | -0.88 | 0.19 | 0 | 0 | 0 | not significant |
| 4471 | GO_RRNA_METHYLATION                                              | -0.88 | 0.19 | 0 | 0 | 0 | not significant |
| 4472 | GO_WATER_HOMEOSTASIS                                             | -0.88 | 0.19 | 0 | 0 | 0 | not significant |
| 4473 | SCHLESINGER_METHYLATED_DE_NOVO_IN_CANCER                         | -0.88 | 0.19 | 0 | 0 | 0 | not significant |
| 4474 | VANTVEER_BREAST_CANCER_BRCA1_DN                                  | -0.88 | 0.19 | 0 | 0 | 0 | not significant |
| 4475 | GO_CHROMATIN_SILENCING_AT_RDNA                                   | -0.88 | 0.18 | 0 | 0 | 0 | not significant |
| 4476 | GO_INSULIN_RESPONSIVE_COMPARTMENT                                | -0.88 | 0.18 | 0 | 0 | 0 | not significant |
| 4477 | GO_NON_MEMBRANE_SPANNING_PROTEIN_TYROSINE_KINASE_ACTIVITY        | -0.88 | 0.18 | 0 | 0 | 0 | not significant |
| 4478 | GO_NUCLEAR_TRANSCRIBED_MRNA_CATABOLIC_PROCESS_EXONUCLEOLYTIC     | -0.88 | 0.18 | 0 | 0 | 0 | not significant |
| 4479 | GO_SCHWANN_CELL_DIFFERENTIATION                                  | -0.88 | 0.18 | 0 | 0 | 0 | not significant |
| 4480 | XU_GH1_EXOGENOUS_TARGETS_DN                                      | -0.88 | 0.18 | 0 | 0 | 0 | not significant |
| 4481 | CHR2P11                                                          | -0.88 | 0.17 | 0 | 0 | 0 | not significant |
| 4482 | CHR6Q21                                                          | -0.88 | 0.17 | 0 | 0 | 0 | not significant |
| 4483 | GO_ACTIVATION_OF_PROTEIN_KINASE_B_ACTIVITY                       | -0.88 | 0.17 | 0 | 0 | 0 | not significant |
| 4484 | GO_PROTEIN_INSERTION_INTO_MEMBRANE                               | -0.88 | 0.17 | 0 | 0 | 0 | not significant |
| 4485 | GO_SUPEROXIDE_METABOLIC_PROCESS                                  | -0.88 | 0.17 | 0 | 0 | 0 | not significant |
| 4486 | REACTOME_PHASE_1_FUNCTIONALIZATION_OF_COMPOUNDS                  | -0.88 | 0.17 | 0 | 0 | 0 | not significant |
| 4487 | STAMBOLSKY_RESPONSE_TO_VITAMIN_D3_UP                             | -0.88 | 0.17 | 0 | 0 | 0 | not significant |
| 4488 | GO_DNA_REPAIR_COMPLEX                                            | -0.88 | 0.16 | 0 | 0 | 0 | not significant |
| 4489 | GO_NADH_DEHYDROGENASE_ACTIVITY                                   | -0.88 | 0.16 | 0 | 0 | 0 | not significant |
| 4490 | GO_FIBROBLAST_PROLIFERATION                                      | -0.88 | 0.15 | 0 | 0 | 0 | not significant |
| 4491 | GO_NON_MOTILE_CILIUM                                             | -0.88 | 0.15 | 0 | 0 | 0 | not significant |
| 4492 | GO_APPENDAGE_MORPHOGENESIS                                       | -0.88 | 0.13 | 0 | 0 | 0 | not significant |
| 4493 | RAO_BOUND_BY_SALL4_ISOFORM_A                                     | -0.88 | 0.12 | 0 | 0 | 0 | not significant |
| 4494 | WEI_MIR34A_TARGETS                                               | -0.88 | 0.12 | 0 | 0 | 0 | not significant |
| 4495 | LTE2_UP_V1_DN                                                    | -0.88 | 0.1  | 0 | 0 | 0 | not significant |
| 4496 | GO_POSITIVE_REGULATION_OF_SUPRAMOLECULAR_FIBER_ORGANIZATION      | -0.88 | 0.09 | 0 | 0 | 0 | not significant |
| 4497 | GO_DENDRITE_DEVELOPMENT                                          | -0.88 | 0.07 | 0 | 0 | 0 | not significant |
| 4498 | GO_CELL_SUBSTRATE_ADHESION                                       | -0.88 | 0.05 | 0 | 0 | 0 | not significant |
| 4499 | RICKMAN_METASTASIS_UP                                            | -0.88 | 0.04 | 0 | 0 | 0 | not significant |
| 4500 | REACTOME_HYALURONAN_METABOLISM                                   | -0.87 | 0.22 | 0 | 0 | 0 | not significant |
| 4501 | GO_POSITIVE_REGULATION_OF_GLUONEOGENESIS                         | -0.87 | 0.21 | 0 | 0 | 0 | not significant |
| 4502 | GO_POSITIVE_REGULATION_OF_NON_MOTILE_CILIUM_ASSEMBLY             | -0.87 | 0.21 | 0 | 0 | 0 | not significant |
| 4503 | BIOCARTA_LEPTIN_PATHWAY                                          | -0.87 | 0.2  | 0 | 0 | 0 | not significant |
| 4504 | BIOCARTA_TALL1_PATHWAY                                           | -0.87 | 0.2  | 0 | 0 | 0 | not significant |
| 4505 | GO_CELL_PROLIFERATION_IN_FOREBRAIN                               | -0.87 | 0.2  | 0 | 0 | 0 | not significant |
| 4506 | GO_CENTROMERIC_DNA_BINDING                                       | -0.87 | 0.2  | 0 | 0 | 0 | not significant |
| 4507 | GO_NAD_BIOSYNTHESIS_VIA_NICOTINAMIDE_RIBOSIDE_SALVAGE_PATHWAY    | -0.87 | 0.2  | 0 | 0 | 0 | not significant |
| 4508 | GO_POSITIVE_REGULATION_OF_CYTOPLASMIC_TRANSLATION                | -0.87 | 0.2  | 0 | 0 | 0 | not significant |
| 4509 | GO_POSITIVE_REGULATION_OF_MUSCLE_CONTRACTION                     | -0.87 | 0.2  | 0 | 0 | 0 | not significant |
| 4510 | GO_POSITIVE_REGULATION_OF_RECEPTOR_INTERNALIZATION               | -0.87 | 0.2  | 0 | 0 | 0 | not significant |
| 4511 | GO_RESOLUTION_OF_MEIOTIC_RECOMBINATION_INTERMEDIATES             | -0.87 | 0.2  | 0 | 0 | 0 | not significant |
| 4512 | GO_VIRAL_LATENCY                                                 | -0.87 | 0.2  | 0 | 0 | 0 | not significant |
| 4513 | REACTOME_SYNTHESIS_OF_GDP_MANNOSE                                | -0.87 | 0.2  | 0 | 0 | 0 | not significant |
| 4514 | AMUNDSON_GAMMA_RADIATION_RESISTANCE                              | -0.87 | 0.19 | 0 | 0 | 0 | not significant |
| 4515 | GO ASPARTATE FAMILY AMINO ACID CATABOLIC PROCESS                 | -0.87 | 0.19 | 0 | 0 | 0 | not significant |
| 4516 | GO_CEREBELLAR_PURKINJE_CELL_LAYER_MORPHOGENESIS                  | -0.87 | 0.19 | 0 | 0 | 0 | not significant |
| 4517 | GO_HIGH_DENSITY_LIPOPROTEIN_PARTICLE_CLEARANCE                   | -0.87 | 0.19 | 0 | 0 | 0 | not significant |
| 4518 | GO_NUCLEAR_INCLUSION_BODY                                        | -0.87 | 0.19 | 0 | 0 | 0 | not significant |
| 4519 | GO_PHOSPHATIDYLINOSITOL_TRANSPORTER_ACTIVITY                     | -0.87 | 0.19 | 0 | 0 | 0 | not significant |
| 4520 | GO_POSITIVE_REGULATION_OF_PHOSPHOLIPID_TRANSPORT                 | -0.87 | 0.19 | 0 | 0 | 0 | not significant |
| 4521 | GO_TUBULAR_ENDOSOME                                              | -0.87 | 0.19 | 0 | 0 | 0 | not significant |
| 4522 | NEBEN_AML_WITH_FLT3_OR_NRAS_UP                                   | -0.87 | 0.19 | 0 | 0 | 0 | not significant |
| 4523 | REACTOME_CREB_PHOSPHORYLATION                                    | -0.87 | 0.19 | 0 | 0 | 0 | not significant |
| 4524 | REACTOME_P75NTR_RECRUITS_SIGNALING_COMPLEXES                     | -0.87 | 0.19 | 0 | 0 | 0 | not significant |
| 4525 | REACTOME_REGULATION_OF_TP53_ACTIVITY_THROUGH_METHYLATION         | -0.87 | 0.19 | 0 | 0 | 0 | not significant |
| 4526 | REACTOME_RUNK3_REGULATES_NOTCH_SIGNALING                         | -0.87 | 0.19 | 0 | 0 | 0 | not significant |
| 4527 | BIOCARTA_RAC1_PATHWAY                                            | -0.87 | 0.18 | 0 | 0 | 0 | not significant |
| 4528 | CHEN_ETV5_TARGETS_SERTOLI                                        | -0.87 | 0.18 | 0 | 0 | 0 | not significant |
| 4529 | GO_CALCIIUM_CHANNEL_COMPLEX                                      | -0.87 | 0.18 | 0 | 0 | 0 | not significant |
| 4530 | GO_COLUMNAR_CUBOIDAL_EPITHELIAL_CELL_DEVELOPMENT                 | -0.87 | 0.18 | 0 | 0 | 0 | not significant |
| 4531 | GO_DENTATE_GYRUS_DEVELOPMENT                                     | -0.87 | 0.18 | 0 | 0 | 0 | not significant |
| 4532 | GO_INTERFERON_ALPHA_PRODUCTION                                   | -0.87 | 0.18 | 0 | 0 | 0 | not significant |
| 4533 | GO_POSITIVE_REGULATION_OF_CHROMOSOME_SEPARATION                  | -0.87 | 0.18 | 0 | 0 | 0 | not significant |
| 4534 | GO_ROSTROCAUDAL_NEURAL_TUBE_PATTERNING                           | -0.87 | 0.18 | 0 | 0 | 0 | not significant |
| 4535 | GO_TRNA_SPECIFIC_ADENOSINE_DEAMINASE_ACTIVITY                    | -0.87 | 0.18 | 0 | 0 | 0 | not significant |
| 4536 | PID_ERB_GENOMIC_PATHWAY                                          | -0.87 | 0.18 | 0 | 0 | 0 | not significant |
| 4537 | REACTOME_THROMBIN_SIGNALING_THROUGH_PROTEINASE_ACTIVATED_RECEPT  | -0.87 | 0.18 | 0 | 0 | 0 | not significant |
| 4538 | YAGI_AML_RELAPSE_PROGNOSIS                                       | -0.87 | 0.18 | 0 | 0 | 0 | not significant |
| 4539 | CERVERA_SDHB_TARGETS_1_UP                                        | -0.87 | 0.17 | 0 | 0 | 0 | not significant |
| 4540 | GO_PROTEIN_K63_LINKED_DEUBIQUITINATION                           | -0.87 | 0.17 | 0 | 0 | 0 | not significant |
| 4541 | GO_STRIATED_MUSCLE_CELL_APOPTOTIC_PROCESS                        | -0.87 | 0.17 | 0 | 0 | 0 | not significant |
| 4542 | MA_MYELOID_DIFFERENTIATION_UP                                    | -0.87 | 0.17 | 0 | 0 | 0 | not significant |
| 4543 | PID_ATM_PATHWAY                                                  | -0.87 | 0.17 | 0 | 0 | 0 | not significant |
| 4544 | REACTOME_OVARIAN_TUMOR_DOMAIN_PROTEASES                          | -0.87 | 0.17 | 0 | 0 | 0 | not significant |
| 4545 | ZHAN_MULTIPLE_MYELOMA_CD1_AND_CD2_DN                             | -0.87 | 0.17 | 0 | 0 | 0 | not significant |
| 4546 | CHR17Q23                                                         | -0.87 | 0.16 | 0 | 0 | 0 | not significant |
| 4547 | CHR2P25                                                          | -0.87 | 0.16 | 0 | 0 | 0 | not significant |
| 4548 | GO_CLATHRIN_BINDING                                              | -0.87 | 0.16 | 0 | 0 | 0 | not significant |
| 4549 | REACTOME_APOPTOTIC_EXECUTION_PHASE                               | -0.87 | 0.16 | 0 | 0 | 0 | not significant |
| 4550 | REACTOME_INTRA_GOLGI_TRAFFIC                                     | -0.87 | 0.16 | 0 | 0 | 0 | not significant |
| 4551 | KEGG_ENDOMETRIAL_CANCER                                          | -0.87 | 0.15 | 0 | 0 | 0 | not significant |
| 4552 | LANDIS_ERBB2_BREAST_PRENEOPLASTIC_DN                             | -0.87 | 0.15 | 0 | 0 | 0 | not significant |
| 4553 | REACTOME_CARDIAC_CONDUCTION                                      | -0.87 | 0.15 | 0 | 0 | 0 | not significant |
| 4554 | REN_ALVEOLAR_RHABDOMYOSARCOMA_UP                                 | -0.87 | 0.15 | 0 | 0 | 0 | not significant |
| 4555 | OUILLETTE_CLL_13Q14_DELETION_UP                                  | -0.87 | 0.14 | 0 | 0 | 0 | not significant |
| 4556 | RIZ_ERYTHROID_DIFFERENTIATION                                    | -0.87 | 0.14 | 0 | 0 | 0 | not significant |
| 4557 | GO_EPHRIN_RECEPTOR_SIGNALING_PATHWAY                             | -0.87 | 0.13 | 0 | 0 | 0 | not significant |
| 4558 | GO_PROTEIN_TYROSINE_KINASE_BINDING                               | -0.87 | 0.13 | 0 | 0 | 0 | not significant |
| 4559 | GO_RIBONUCLEASE_ACTIVITY                                         | -0.87 | 0.13 | 0 | 0 | 0 | not significant |
| 4560 | GO_UBIQUITIN_BINDING                                             | -0.87 | 0.13 | 0 | 0 | 0 | not significant |
| 4561 | RAGHAVACHARI_PLATELET_SPECIFIC_GENES                             | -0.87 | 0.13 | 0 | 0 | 0 | not significant |
| 4562 | REACTOME_MACROAUTOPHAGY                                          | -0.87 | 0.13 | 0 | 0 | 0 | not significant |
| 4563 | GO_NUCLEOBASE_CONTAINING_SMALL_MOLECULE_BIOSYNTHETIC_PROCESS     | -0.87 | 0.12 | 0 | 0 | 0 | not significant |
| 4564 | REACTOME_NEGATIVE_REGULATION_OF_THE_P13K_AKT_NETWORK             | -0.87 | 0.12 | 0 | 0 | 0 | not significant |
| 4565 | ROME_INSULIN_TARGETS_IN_MUSCLE_DN                                | -0.87 | 0.11 | 0 | 0 | 0 | not significant |
| 4566 | CHR12Q24                                                         | -0.87 | 0.07 | 0 | 0 | 0 | not significant |

|      |                                                                   |       |      |   |   |   |                 |
|------|-------------------------------------------------------------------|-------|------|---|---|---|-----------------|
| 4567 | GO_REGULATION_OF_ACTIN_FILAMENT_BASED_PROCESS                     | -0.87 | 0.05 | 0 | 0 | 0 | not significant |
| 4568 | BRUNIS_UVC_RESPONSE_EARLY_LATE                                    | -0.87 | 0.04 | 0 | 0 | 0 | not significant |
| 4569 | GO_REGULATION_OF_SUPRAMOLECULAR_FIBER_ORGANIZATION                | -0.87 | 0.03 | 0 | 0 | 0 | not significant |
| 4570 | GO_CARDIOBLAST_PROLIFERATION                                      | -0.86 | 0.21 | 0 | 0 | 0 | not significant |
| 4571 | GO_RESPONSE_TO_MUSCLE_ACTIVITY                                    | -0.86 | 0.21 | 0 | 0 | 0 | not significant |
| 4572 | GO_ALDITOL_METABOLIC_PROCESS                                      | -0.86 | 0.2  | 0 | 0 | 0 | not significant |
| 4573 | GO_NEUROTROPHIN_TRK_RECEPTOR_BINDING                              | -0.86 | 0.2  | 0 | 0 | 0 | not significant |
| 4574 | GO_NUCLEAR_MEMBRANE_ORGANIZATION                                  | -0.86 | 0.2  | 0 | 0 | 0 | not significant |
| 4575 | GO_PEPTIDE_HORMONE_BINDING                                        | -0.86 | 0.2  | 0 | 0 | 0 | not significant |
| 4576 | GO_POSITIVE_REGULATION_OF_METANEPHROS_DEVELOPMENT                 | -0.86 | 0.2  | 0 | 0 | 0 | not significant |
| 4577 | GO_PRE_MRNA_INTRONIC_BINDINGS                                     | -0.86 | 0.2  | 0 | 0 | 0 | not significant |
| 4578 | GO_REGULATION_OF_ENDODEOXYRIBONUCLEASE_ACTIVITY                   | -0.86 | 0.2  | 0 | 0 | 0 | not significant |
| 4579 | GO_UBIQUITIN_SPECIFIC_PROTEASE_BINDING                            | -0.86 | 0.2  | 0 | 0 | 0 | not significant |
| 4580 | ROZANOV_MMP14_CORRELATED                                          | -0.86 | 0.2  | 0 | 0 | 0 | not significant |
| 4581 | GENTILE_UV_LOW_DOSE_UP                                            | -0.86 | 0.19 | 0 | 0 | 0 | not significant |
| 4582 | GO_EMBRYONIC_NEUROCRANIUM_MORPHOGENESIS                           | -0.86 | 0.19 | 0 | 0 | 0 | not significant |
| 4583 | GO_INOSITOL_PHOSPHATE_PHOSPHATASE_ACTIVITY                        | -0.86 | 0.19 | 0 | 0 | 0 | not significant |
| 4584 | GO_INTEGRAL_COMPONENT_OF_PRESYNAPTIC_ACTIVE_ZONE_MEMBRANE         | -0.86 | 0.19 | 0 | 0 | 0 | not significant |
| 4585 | GO_MODIFICATION_OF_POSTSYNAPTIC_STRUCTURE                         | -0.86 | 0.19 | 0 | 0 | 0 | not significant |
| 4586 | GO_POSITIVE_REGULATION_OF_CELL_AGING                              | -0.86 | 0.19 | 0 | 0 | 0 | not significant |
| 4587 | GO_PRIMARY_MIRNA_BINDING                                          | -0.86 | 0.19 | 0 | 0 | 0 | not significant |
| 4588 | GO_REGULATION_OF_FEEDING_BEHAVIOR                                 | -0.86 | 0.19 | 0 | 0 | 0 | not significant |
| 4589 | GO_REGULATION_OF_NEUROTRANSMITTER_UPTAKE                          | -0.86 | 0.19 | 0 | 0 | 0 | not significant |
| 4590 | GO_RISC_LOADING_COMPLEX                                           | -0.86 | 0.19 | 0 | 0 | 0 | not significant |
| 4591 | GO_VASCULAR_ASSOCIATED_SMOOTH_MUSCLE_CELL_MIGRATION               | -0.86 | 0.19 | 0 | 0 | 0 | not significant |
| 4592 | REACTOME_PKA_ACTIVATION_IN_GLYCAGON_SIGNALLING                    | -0.86 | 0.19 | 0 | 0 | 0 | not significant |
| 4593 | REACTOME_ZINC_INFLUX_INTO_CELLS_BY_THE_SLC39_GENE_FAMILY          | -0.86 | 0.19 | 0 | 0 | 0 | not significant |
| 4594 | CHR3P26                                                           | -0.86 | 0.18 | 0 | 0 | 0 | not significant |
| 4595 | GENTILE_UV_RESPONSE_CLUSTER_D9                                    | -0.86 | 0.18 | 0 | 0 | 0 | not significant |
| 4596 | GO_ACTIN_MONOMER_BINDING                                          | -0.86 | 0.18 | 0 | 0 | 0 | not significant |
| 4597 | GO_ACTIVATION_OF_CYSINE_TYPE_ENDOPEPTIDASE_ACTIVITY_INVOLVED_IN_A | -0.86 | 0.18 | 0 | 0 | 0 | not significant |
| 4598 | GO_DOUBLE_STRAND_BREAK_REPAIR_VIA_SINGLE_STRAND_ANNEALING         | -0.86 | 0.18 | 0 | 0 | 0 | not significant |
| 4599 | GO_MAINTENANCE_OF_DNA_REPEAT_ELEMENTS                             | -0.86 | 0.18 | 0 | 0 | 0 | not significant |
| 4600 | GO_NEGATIVE_REGULATION_OF_DEFENSE_RESPONSE_TO_VIRUS               | -0.86 | 0.18 | 0 | 0 | 0 | not significant |
| 4601 | GO_PEPTIDYL_LYSINE_MONOMETHYLATION                                | -0.86 | 0.18 | 0 | 0 | 0 | not significant |
| 4602 | GO_POSITIVE_REGULATION_OF_GLYCOPROTEIN_METABOLIC_PROCESS          | -0.86 | 0.18 | 0 | 0 | 0 | not significant |
| 4603 | GO_REGULATION_OF_SUPEROXIDE_METABOLIC_PROCESS                     | -0.86 | 0.18 | 0 | 0 | 0 | not significant |
| 4604 | REACTOME_MAPK1_ERK2_ACTIVATION                                    | -0.86 | 0.18 | 0 | 0 | 0 | not significant |
| 4605 | REACTOME_REGULATION_OF_LOCALIZATION_OF_FOXP1_TRANSCRIPTION_FACTOR | -0.86 | 0.18 | 0 | 0 | 0 | not significant |
| 4606 | BIOCARTA_SM_PATHWAY                                               | -0.86 | 0.17 | 0 | 0 | 0 | not significant |
| 4607 | GO_NEGATIVE_REGULATION_OF_CALCIIUM_ION_TRANSMEMBRANE_TRANSPORT    | -0.86 | 0.17 | 0 | 0 | 0 | not significant |
| 4608 | KORKOLA_EMBRYONAL_CARCINOMA                                       | -0.86 | 0.17 | 0 | 0 | 0 | not significant |
| 4609 | OKAWA_NEUROBLASTOMA_1P36_31_DELETION                              | -0.86 | 0.17 | 0 | 0 | 0 | not significant |
| 4610 | TSENG_ADIPOGENIC_POTENTIAL_UP                                     | -0.86 | 0.17 | 0 | 0 | 0 | not significant |
| 4611 | GO_OLIGODENDROCYTE_DIFFERENTIATION                                | -0.86 | 0.16 | 0 | 0 | 0 | not significant |
| 4612 | TOMLINS_PROSTATE_CANCER_UP                                        | -0.86 | 0.16 | 0 | 0 | 0 | not significant |
| 4613 | GO_NAD_BINDING                                                    | -0.86 | 0.15 | 0 | 0 | 0 | not significant |
| 4614 | GO_PROTEIN_MONOUBIQUITINATION                                     | -0.86 | 0.15 | 0 | 0 | 0 | not significant |
| 4615 | GO_HISTONE_UBIQUITINATION                                         | -0.86 | 0.14 | 0 | 0 | 0 | not significant |
| 4616 | GO_REGULATION_OF_GLIOGENESIS                                      | -0.86 | 0.14 | 0 | 0 | 0 | not significant |
| 4617 | GO_TETHERING_COMPLEX                                              | -0.86 | 0.14 | 0 | 0 | 0 | not significant |
| 4618 | PID_RAC1_REG_PATHWAY                                              | -0.86 | 0.14 | 0 | 0 | 0 | not significant |
| 4619 | GO_NEGATIVE_REGULATION_OF_EPITHELIAL_CELL_PROLIFERATION           | -0.86 | 0.12 | 0 | 0 | 0 | not significant |
| 4620 | GO_NEGATIVE_REGULATION_OF_TRANSMEMBRANE_RECEPTOR_PROTEIN_SERINE   | -0.86 | 0.12 | 0 | 0 | 0 | not significant |
| 4621 | REACTOME_RHO_GTPASES_ACTIVATE_PKNS                                | -0.86 | 0.12 | 0 | 0 | 0 | not significant |
| 4622 | GO_MONOCARBOXYLIC_ACID_TRANSPORT                                  | -0.86 | 0.11 | 0 | 0 | 0 | not significant |
| 4623 | REACTOME_EUKARYOTIC_TRANSLATION_INITIATION                        | -0.86 | 0.1  | 0 | 0 | 0 | not significant |
| 4624 | GO_SPERM_PART                                                     | -0.86 | 0.09 | 0 | 0 | 0 | not significant |
| 4625 | PROVENZANI_METASTASIS_DN                                          | -0.86 | 0.08 | 0 | 0 | 0 | not significant |
| 4626 | GO_PYRIMIDINE_NUCLEOTIDE_CATABOLIC_PROCESS                        | -0.85 | 0.19 | 0 | 0 | 0 | not significant |
| 4627 | MATZUK_SPERMATOGONIA                                              | -0.85 | 0.19 | 0 | 0 | 0 | not significant |
| 4628 | REACTOME_TYSND1_CLEAVES_PEROXISOMAL_PROTEINS                      | -0.85 | 0.19 | 0 | 0 | 0 | not significant |
| 4629 | FINETTI_BREAST_CANCERS_KINOME_BLUE                                | -0.85 | 0.18 | 0 | 0 | 0 | not significant |
| 4630 | GO_COPII_COATED_VESICLE_CARGO_LOADING                             | -0.85 | 0.18 | 0 | 0 | 0 | not significant |
| 4631 | GO_DYNEIN_LIGHT_INTERMEDIATE_CHAIN_BINDING                        | -0.85 | 0.18 | 0 | 0 | 0 | not significant |
| 4632 | GO_HISTONE_H4_K20_METHYLATION                                     | -0.85 | 0.18 | 0 | 0 | 0 | not significant |
| 4633 | GO_NEGATIVE_REGULATION_OF_NATURAL_KILLER_CELL_ACTIVATION          | -0.85 | 0.18 | 0 | 0 | 0 | not significant |
| 4634 | GO_NUCLEAR_PORE_COMPLEX_ASSEMBLY                                  | -0.85 | 0.18 | 0 | 0 | 0 | not significant |
| 4635 | GO_REGULATION_OF_INTEGRIN_ACTIVATION                              | -0.85 | 0.18 | 0 | 0 | 0 | not significant |
| 4636 | GO_REGULATION_OF_RHODOPSIN_MEDIATED_SIGNALING_PATHWAY             | -0.85 | 0.18 | 0 | 0 | 0 | not significant |
| 4637 | GO_SKELETAL_MYOFIBRIL_ASSEMBLY                                    | -0.85 | 0.18 | 0 | 0 | 0 | not significant |
| 4638 | HEIDENBLAD_AMPLIFIED_IN_SOFT_TISSUE_CANCER                        | -0.85 | 0.18 | 0 | 0 | 0 | not significant |
| 4639 | REACTOME_METABOLISM_OF_NITRIC_OXIDE_ENOS_ACTIVATION_AND_REGULATIO | -0.85 | 0.18 | 0 | 0 | 0 | not significant |
| 4640 | BIOCARTA_PLCE_PATHWAY                                             | -0.85 | 0.17 | 0 | 0 | 0 | not significant |
| 4641 | GO_CEREBELLAR_CORTEX_MORPHOGENESIS                                | -0.85 | 0.17 | 0 | 0 | 0 | not significant |
| 4642 | GO_G_PROTEIN_BETA_SUBUNIT_BINDING                                 | -0.85 | 0.17 | 0 | 0 | 0 | not significant |
| 4643 | GO_IONOTROPIC_Glutamate_Receptor_Binding                          | -0.85 | 0.17 | 0 | 0 | 0 | not significant |
| 4644 | GO_NEGATIVE_REGULATION_OF_CELL_JUNCTION_ASSEMBLY                  | -0.85 | 0.17 | 0 | 0 | 0 | not significant |
| 4645 | GO_NEGATIVE_REGULATION_OF_GENE_SILENCING                          | -0.85 | 0.17 | 0 | 0 | 0 | not significant |
| 4646 | GO_NEGATIVE_REGULATION_OF_MICROTUBULE_POLYMERIZATION_OR_DEPOLYMI  | -0.85 | 0.17 | 0 | 0 | 0 | not significant |
| 4647 | GO_NEGATIVE_REGULATION_OF_OSTEOCLAST_DIFFERENTIATION              | -0.85 | 0.17 | 0 | 0 | 0 | not significant |
| 4648 | GO_NEGATIVE_REGULATION_OF_POTASSIUM_ION_TRANSPORT                 | -0.85 | 0.17 | 0 | 0 | 0 | not significant |
| 4649 | GO_REGULATION_OF_GLUCCORTICOID_RECEPTOR_SIGNALING_PATHWAY         | -0.85 | 0.17 | 0 | 0 | 0 | not significant |
| 4650 | NUMATA_CSF3_SIGNALING_VIA_STAT3                                   | -0.85 | 0.17 | 0 | 0 | 0 | not significant |
| 4651 | REACTOME_INTERLEUKIN_37_SIGNALING                                 | -0.85 | 0.17 | 0 | 0 | 0 | not significant |
| 4652 | REACTOME_TRISTETRAPROLIN_TTP_ZFP36_BINDS_AND_DESTABILIZES_MRNA    | -0.85 | 0.17 | 0 | 0 | 0 | not significant |
| 4653 | SESTO_RESPONSE_TO_UV_C3                                           | -0.85 | 0.17 | 0 | 0 | 0 | not significant |
| 4654 | WANG_RECURRENT_LIVER_CANCER_UP                                    | -0.85 | 0.17 | 0 | 0 | 0 | not significant |
| 4655 | ZHANG_ADIPOGENESIS_BY_BMP7                                        | -0.85 | 0.17 | 0 | 0 | 0 | not significant |
| 4656 | CREIGHTON_AKT1_SIGNALING_VIA_MTOR_UP                              | -0.85 | 0.16 | 0 | 0 | 0 | not significant |
| 4657 | GAZDA_DIAMOND_BLACKFAN_ANEMIA_PROGENITOR_UP                       | -0.85 | 0.16 | 0 | 0 | 0 | not significant |
| 4658 | REACTOME_NEF_AND_SIGNAL_TRANSDUCTION                              | -0.85 | 0.16 | 0 | 0 | 0 | not significant |
| 4659 | GARGALOVIC_RESPONSE_TO_OXIDIZED_PHOSPHOLIPIDS_YELLOW_UP           | -0.85 | 0.15 | 0 | 0 | 0 | not significant |
| 4660 | GO_DNA_DEALKYLATION                                               | -0.85 | 0.15 | 0 | 0 | 0 | not significant |
| 4661 | JOHANSON_BRAIN_CANCER_EARLY_VS_LATE_DN                            | -0.85 | 0.15 | 0 | 0 | 0 | not significant |
| 4662 | GO_RESPONSE_TO_AXON_INJURY                                        | -0.85 | 0.14 | 0 | 0 | 0 | not significant |
| 4663 | HENDRICKS_SMARCA4_TARGETS_UP                                      | -0.85 | 0.14 | 0 | 0 | 0 | not significant |
| 4664 | REACTOME_INSULIN_RECEPTOR_SIGNALLING_CASCADE                      | -0.85 | 0.14 | 0 | 0 | 0 | not significant |
| 4665 | GO_INTRACILIARY_TRANSPORT_INVOLVED_IN_CILIUM_ASSEMBLY             | -0.85 | 0.13 | 0 | 0 | 0 | not significant |
| 4666 | KYNG_WERNER_SYNDROM_AND_NORMAL_AGING_UP                           | -0.85 | 0.11 | 0 | 0 | 0 | not significant |
| 4667 | GO_GLUCCOSE_METABOLIC_PROCESS                                     | -0.85 | 0.1  | 0 | 0 | 0 | not significant |
| 4668 | BYSTRYKH_HEMATOPOIESIS_STEM_CELL_QTL_CIS                          | -0.85 | 0.08 | 0 | 0 | 0 | not significant |
| 4669 | GO_INSULIN_RECEPTOR_SIGNALING_PATHWAY                             | -0.85 | 0.07 | 0 | 0 | 0 | not significant |
| 4670 | GRYDER_PAXFOXD1_ENHANCERS_KO_DOWN                                 | -0.85 | 0.02 | 0 | 0 | 0 | not significant |
| 4671 | GO_REGULATION_OF_GLYCOPROTEIN_METABOLIC_PROCESS                   | -0.84 | 0.19 | 0 | 0 | 0 | not significant |
| 4672 | GO_POSITIVE_REGULATION_OF_CALCINEURIN_MEDIATED_SIGNALING          | -0.84 | 0.18 | 0 | 0 | 0 | not significant |
| 4673 | GO_RESPONSE_TO_METHYLMERCURY                                      | -0.84 | 0.18 | 0 | 0 | 0 | not significant |
| 4674 | GO_RETINAL_METABOLIC_PROCESS                                      | -0.84 | 0.18 | 0 | 0 | 0 | not significant |
| 4675 | MARIADASON_RESPONSE_TO_CURCUMIN_SULINDAC_7                        | -0.84 | 0.18 | 0 | 0 | 0 | not significant |

|      |                                                                         |       |      |   |   |   |                 |
|------|-------------------------------------------------------------------------|-------|------|---|---|---|-----------------|
| 4676 | REACTOME_PROCESSING_OF_SMDT1                                            | -0.84 | 0.18 | 0 | 0 | 0 | not significant |
| 4677 | AMIT_DELAYED_EARLY_GENES                                                | -0.84 | 0.17 | 0 | 0 | 0 | not significant |
| 4678 | BIOCARTA_CHREBP_PATHWAY                                                 | -0.84 | 0.17 | 0 | 0 | 0 | not significant |
| 4679 | GO_ADRENAL_GLAND_DEVELOPMENT                                            | -0.84 | 0.17 | 0 | 0 | 0 | not significant |
| 4680 | GO_CONTRACTILE_RING                                                     | -0.84 | 0.17 | 0 | 0 | 0 | not significant |
| 4681 | GO_EXCITATORY_SYNAPSE_ASSEMBLY                                          | -0.84 | 0.17 | 0 | 0 | 0 | not significant |
| 4682 | GO_NUCLEOTIDE_EXCISION_REPAIR_DNA_DUPLEX_UNWINDING                      | -0.84 | 0.17 | 0 | 0 | 0 | not significant |
| 4683 | GO_PROTEIN_NEDDYLATION                                                  | -0.84 | 0.17 | 0 | 0 | 0 | not significant |
| 4684 | GO_REGULATION_OF_GTP_BINDING                                            | -0.84 | 0.17 | 0 | 0 | 0 | not significant |
| 4685 | GO_TRANSLOCON_COMPLEX                                                   | -0.84 | 0.17 | 0 | 0 | 0 | not significant |
| 4686 | REACTOME_NEGATIVE_FEEDBACK_REGULATION_OF_MAPK_PATHWAY                   | -0.84 | 0.17 | 0 | 0 | 0 | not significant |
| 4687 | REACTOME_REGULATION_OF_IFNG_SIGNALING                                   | -0.84 | 0.17 | 0 | 0 | 0 | not significant |
| 4688 | WORSCHER_TUMOR_EVASION_AND_TOLEROGENICITY_DN                            | -0.84 | 0.17 | 0 | 0 | 0 | not significant |
| 4689 | XU_RESPONSE_TO_TRETINOIN_DN                                             | -0.84 | 0.17 | 0 | 0 | 0 | not significant |
| 4690 | BIOCARTA_AKAPCENTROSOME_PATHWAY                                         | -0.84 | 0.16 | 0 | 0 | 0 | not significant |
| 4691 | BIOCARTA_ETC_PATHWAY                                                    | -0.84 | 0.16 | 0 | 0 | 0 | not significant |
| 4692 | GARGALOVIC_RESPONSE_TO_OXIDIZED_PHOSPHOLIPIDS_GREEN_UP                  | -0.84 | 0.16 | 0 | 0 | 0 | not significant |
| 4693 | GO_CELLULAR_RESPONSE_TO_GONADOTROPIN_STIMULUS                           | -0.84 | 0.16 | 0 | 0 | 0 | not significant |
| 4694 | GO_FACE_MORPHOGENESIS                                                   | -0.84 | 0.16 | 0 | 0 | 0 | not significant |
| 4695 | GO_MITOCHONDRIAL_ACETYL_COA_BIOSYNTHETIC_PROCESS_FROM_PYRUVATE          | -0.84 | 0.16 | 0 | 0 | 0 | not significant |
| 4696 | GO_MYOSIN_V_BINDING                                                     | -0.84 | 0.16 | 0 | 0 | 0 | not significant |
| 4697 | GO_NEGATIVE_REGULATION_OF_RETINOIC_ACID_RECEPTOR_SIGNALING_PATHWAY      | -0.84 | 0.16 | 0 | 0 | 0 | not significant |
| 4698 | GO_REGULATION_OF_FEMALE_GONAD_DEVELOPMENT                               | -0.84 | 0.16 | 0 | 0 | 0 | not significant |
| 4699 | GO_SMAD_PROTEIN_COMPLEX_ASSEMBLY                                        | -0.84 | 0.16 | 0 | 0 | 0 | not significant |
| 4700 | GO_VENTRICULAR_SYSTEM_DEVELOPMENT                                       | -0.84 | 0.16 | 0 | 0 | 0 | not significant |
| 4701 | KEGG_PROPANOATE_METABOLISM                                              | -0.84 | 0.16 | 0 | 0 | 0 | not significant |
| 4702 | LANDIS_ERBB2_BREAST_TUMORS_65_UP                                        | -0.84 | 0.16 | 0 | 0 | 0 | not significant |
| 4703 | PID_THROMBIN_PAR4_PATHWAY                                               | -0.84 | 0.16 | 0 | 0 | 0 | not significant |
| 4704 | REACTOME_FOXO_MEDIATED_TRANSCRIPTION_OF_OXIDATIVE_STRESS_METABOL        | -0.84 | 0.16 | 0 | 0 | 0 | not significant |
| 4705 | ZEMBUTSU_SENSITIVITY_TO_VINBLASTINE                                     | -0.84 | 0.16 | 0 | 0 | 0 | not significant |
| 4706 | BIOCARTA_CXCR4_PATHWAY                                                  | -0.84 | 0.15 | 0 | 0 | 0 | not significant |
| 4707 | GO_HISTONE_MONOUBIQUITINATION                                           | -0.84 | 0.15 | 0 | 0 | 0 | not significant |
| 4708 | GO_REGULATION_OF_IRE1_MEDIATED_UNFOLDED_PROTEIN_RESPONSE                | -0.84 | 0.15 | 0 | 0 | 0 | not significant |
| 4709 | GO_REGULATION_OF_TELOMERE_CAPPING                                       | -0.84 | 0.15 | 0 | 0 | 0 | not significant |
| 4710 | GO_RESPONSE_TO_AUDITORY_STIMULUS                                        | -0.84 | 0.15 | 0 | 0 | 0 | not significant |
| 4711 | GO_SYNAPTIC_VESICLE_CLUSTERING                                          | -0.84 | 0.15 | 0 | 0 | 0 | not significant |
| 4712 | PID_ALK1_PATHWAY                                                        | -0.84 | 0.15 | 0 | 0 | 0 | not significant |
| 4713 | PID_IL8_CXCR2_PATHWAY                                                   | -0.84 | 0.15 | 0 | 0 | 0 | not significant |
| 4714 | REACTOME_INTERLEUKIN_RECEPTOR_SHC_SIGNALING                             | -0.84 | 0.15 | 0 | 0 | 0 | not significant |
| 4715 | WEIGEL_OXIDATIVE_STRESS_BY_TBH_AND_H2O2                                 | -0.84 | 0.15 | 0 | 0 | 0 | not significant |
| 4716 | GO_DNA_DEALKYLATION_INVOLVED_IN_DNA_REPAIR                              | -0.84 | 0.14 | 0 | 0 | 0 | not significant |
| 4717 | GO_FATTY_ACID_BINDING                                                   | -0.84 | 0.14 | 0 | 0 | 0 | not significant |
| 4718 | GO_NEGATIVE_REGULATION_OF_RESPONSE_TO_WOUNDING                          | -0.84 | 0.14 | 0 | 0 | 0 | not significant |
| 4719 | GO_REGULATION_OF_STEM_CELL_PROLIFERATION                                | -0.84 | 0.14 | 0 | 0 | 0 | not significant |
| 4720 | REACTOME_UPTAKE_AND_ACTIONS_OF_BACTERIAL_TOXINS                         | -0.84 | 0.14 | 0 | 0 | 0 | not significant |
| 4721 | GO_CARDIAC_SEPTUM_MORPHOGENESIS                                         | -0.84 | 0.13 | 0 | 0 | 0 | not significant |
| 4722 | GO_RNA_DESTABILIZATION                                                  | -0.84 | 0.13 | 0 | 0 | 0 | not significant |
| 4723 | LEE_CALORIE_RESTRICTION_MUSCLE_DN                                       | -0.84 | 0.13 | 0 | 0 | 0 | not significant |
| 4724 | REACTOME_NRAGE_SIGNALS_DEATH_THROUGH_JNK                                | -0.84 | 0.12 | 0 | 0 | 0 | not significant |
| 4725 | VANTVEER_BREAST_CANCER_POOR_PROGNOSIS                                   | -0.84 | 0.12 | 0 | 0 | 0 | not significant |
| 4726 | CHR1Q25                                                                 | -0.84 | 0.11 | 0 | 0 | 0 | not significant |
| 4727 | KEGG_MELANOGENESIS                                                      | -0.84 | 0.11 | 0 | 0 | 0 | not significant |
| 4728 | PID_BETA_CATENIN_NUC_PATHWAY                                            | -0.84 | 0.11 | 0 | 0 | 0 | not significant |
| 4729 | REACTOME_DEADENYLATION_DEPENDENT_MRNA_DECAY                             | -0.84 | 0.11 | 0 | 0 | 0 | not significant |
| 4730 | REACTOME_DEPURINATION                                                   | -0.84 | 0.11 | 0 | 0 | 0 | not significant |
| 4731 | OUELLET_CULTURED_OVARIAN_CANCER_INVASIVE_VS_LMP_UP                      | -0.84 | 0.09 | 0 | 0 | 0 | not significant |
| 4732 | ZHONG_RESPONSE_TO_AZACITIDINE_AND_TSA_DN                                | -0.84 | 0.09 | 0 | 0 | 0 | not significant |
| 4733 | GO_REGULATION_OF_BLOOD_CIRCULATION                                      | -0.84 | 0.06 | 0 | 0 | 0 | not significant |
| 4734 | GO_NEURON_APOPTOTIC_PROCESS                                             | -0.84 | 0.04 | 0 | 0 | 0 | not significant |
| 4735 | GO_PROTEIN_ACETYLATION                                                  | -0.84 | 0.04 | 0 | 0 | 0 | not significant |
| 4736 | GO_SENSORY_SYSTEM_DEVELOPMENT                                           | -0.84 | 0.03 | 0 | 0 | 0 | not significant |
| 4737 | KEGG_PENTOSE_AND_GLUCURONATE_INTERCONVERSIONS                           | -0.83 | 0.18 | 0 | 0 | 0 | not significant |
| 4738 | CHRXQ21                                                                 | -0.83 | 0.17 | 0 | 0 | 0 | not significant |
| 4739 | GO_BERGMANN_GLIAL_CELL_DIFFERENTIATION                                  | -0.83 | 0.17 | 0 | 0 | 0 | not significant |
| 4740 | GO_DYNEIN_HEAVY_CHAIN_BINDING                                           | -0.83 | 0.17 | 0 | 0 | 0 | not significant |
| 4741 | GO_GLYCOSYLKERAMIDE_CATABOLIC_PROCESS                                   | -0.83 | 0.17 | 0 | 0 | 0 | not significant |
| 4742 | GO_LOW_DENSITY_LIPOPROTEIN_PARTICLE_RECEPTOR_BIOSYNTHETIC_PROCESS       | -0.83 | 0.17 | 0 | 0 | 0 | not significant |
| 4743 | GO_NEGATIVE_REGULATION_OF_POSTTRANSCRIPTIONAL_GENE_SILENCING            | -0.83 | 0.17 | 0 | 0 | 0 | not significant |
| 4744 | GO_POSITIVE_REGULATION_OF_MACROPHAGE_MIGRATION                          | -0.83 | 0.17 | 0 | 0 | 0 | not significant |
| 4745 | GO_REGULATION_OF_AEROBIC_RESPIRATION                                    | -0.83 | 0.17 | 0 | 0 | 0 | not significant |
| 4746 | GO_REGULATION_OF_WATER_LOSS_VIA_SKIN                                    | -0.83 | 0.17 | 0 | 0 | 0 | not significant |
| 4747 | GO_VESICLE_FUSION_WITH_GOLGI_APPARATUS                                  | -0.83 | 0.17 | 0 | 0 | 0 | not significant |
| 4748 | HEIDENBLAD_AMPLIFIED_IN_BONE_CANCER                                     | -0.83 | 0.17 | 0 | 0 | 0 | not significant |
| 4749 | BIOCARTA_TID_PATHWAY                                                    | -0.83 | 0.16 | 0 | 0 | 0 | not significant |
| 4750 | GO_ERYTHROCYTE_DEVELOPMENT                                              | -0.83 | 0.16 | 0 | 0 | 0 | not significant |
| 4751 | GO_NEGATIVE_REGULATION_OF_CARDIAC_MUSCLE_CELL_DIFFERENTIATION           | -0.83 | 0.16 | 0 | 0 | 0 | not significant |
| 4752 | GO_NEGATIVE_REGULATION_OF_SYSTEMIC_ARTERIAL_BLOOD_PRESSURE              | -0.83 | 0.16 | 0 | 0 | 0 | not significant |
| 4753 | GO_PRODUCTION_OF_SIRNA_INVOLVED_IN_RNA_INTERFERENCE                     | -0.83 | 0.16 | 0 | 0 | 0 | not significant |
| 4754 | GO_REGULATION_OF_GLUONEOGENESIS_BY_REGULATION_OF_TRANSCRIPTION          | -0.83 | 0.16 | 0 | 0 | 0 | not significant |
| 4755 | GO_UBIQUITIN_CONJUGATING_ENZYME_COMPLEX                                 | -0.83 | 0.16 | 0 | 0 | 0 | not significant |
| 4756 | REACTOME_INSULIN_PROCESSING                                             | -0.83 | 0.16 | 0 | 0 | 0 | not significant |
| 4757 | VERNELL_RETINOBLASTOMA_PATHWAY_DN                                       | -0.83 | 0.16 | 0 | 0 | 0 | not significant |
| 4758 | GO_CORPUS_CALLOSUM_DEVELOPMENT                                          | -0.83 | 0.15 | 0 | 0 | 0 | not significant |
| 4759 | GO_GUANOSINE_CONTAINING_COMPOUND_METABOLIC_PROCESS                      | -0.83 | 0.15 | 0 | 0 | 0 | not significant |
| 4760 | GO_INTRINSIC_COMPONENT_OF_PRESYNAPTIC_ACTIVE_ZONE_MEMBRANE              | -0.83 | 0.15 | 0 | 0 | 0 | not significant |
| 4761 | GO_POSITIVE_REGULATION_OF_MYOBlast_DIFFERENTIATION                      | -0.83 | 0.15 | 0 | 0 | 0 | not significant |
| 4762 | GO_REGULATION_OF_OXIDATIVE_STRESS_INDUCED_INTRINSIC_APOPTOTIC_SIGNALING | -0.83 | 0.15 | 0 | 0 | 0 | not significant |
| 4763 | KEGG_TYROSINE_METABOLISM                                                | -0.83 | 0.15 | 0 | 0 | 0 | not significant |
| 4764 | REACTOME_ENOS_ACTIVATION                                                | -0.83 | 0.15 | 0 | 0 | 0 | not significant |
| 4765 | REACTOME_EPHB_MEDIATED_FORWARD_SIGNALING                                | -0.83 | 0.15 | 0 | 0 | 0 | not significant |
| 4766 | SMID_BREAST_CANCER_RELAPSE_IN_BRAIN_UP                                  | -0.83 | 0.15 | 0 | 0 | 0 | not significant |
| 4767 | BIOCARTA_RAS_PATHWAY                                                    | -0.83 | 0.14 | 0 | 0 | 0 | not significant |
| 4768 | GO_B_CELL_APOPTOTIC_PROCESS                                             | -0.83 | 0.14 | 0 | 0 | 0 | not significant |
| 4769 | GO_NEGATIVE_REGULATION_OF_CYCLIN_DEPENDENT_PROTEIN_KINASE_ACTIVITY      | -0.83 | 0.14 | 0 | 0 | 0 | not significant |
| 4770 | GO_REGULATION_OF_NEURONAL_SYNAPTIC_PLASTICITY                           | -0.83 | 0.14 | 0 | 0 | 0 | not significant |
| 4771 | REACTOME_ACTIVATION_OF_IRF3_IRF7_MEDIATED_BY_TBK1_IKK_EPSILON           | -0.83 | 0.14 | 0 | 0 | 0 | not significant |
| 4772 | CHRXQ31                                                                 | -0.83 | 0.13 | 0 | 0 | 0 | not significant |
| 4773 | GO_ACTIN_NUCLEATION                                                     | -0.83 | 0.13 | 0 | 0 | 0 | not significant |
| 4774 | GO_HEAD_MORPHOGENESIS                                                   | -0.83 | 0.13 | 0 | 0 | 0 | not significant |
| 4775 | REACTOME_BUDDING_AND_MATURATION_OF_HIV_VIRION                           | -0.83 | 0.13 | 0 | 0 | 0 | not significant |
| 4776 | CHR3Q25                                                                 | -0.83 | 0.12 | 0 | 0 | 0 | not significant |
| 4777 | GO_RESPONSE_TO_TESTOSTERONE                                             | -0.83 | 0.12 | 0 | 0 | 0 | not significant |
| 4778 | GO_ION_CHANNEL_REGULATOR_ACTIVITY                                       | -0.83 | 0.11 | 0 | 0 | 0 | not significant |
| 4779 | GO_MANGANESE_ION_BINDING                                                | -0.83 | 0.11 | 0 | 0 | 0 | not significant |
| 4780 | ZHAN_MULTIPLE_MYELOMA_UP                                                | -0.83 | 0.11 | 0 | 0 | 0 | not significant |
| 4781 | GO_CHEMICAL_SYNAPTIC_TRANSMISSION_POSTSYNAPTIC                          | -0.83 | 0.1  | 0 | 0 | 0 | not significant |
| 4782 | GO_MEGAKARYOCYTE_DIFFERENTIATION                                        | -0.83 | 0.1  | 0 | 0 | 0 | not significant |
| 4783 | RIZKI_TUMOR_INVASIVENESS_2D_DN                                          | -0.83 | 0.1  | 0 | 0 | 0 | not significant |
| 4784 | DITMER_PTHLH_TARGETS_DN                                                 | -0.83 | 0.08 | 0 | 0 | 0 | not significant |



|      |                                                                    |       |      |   |   |   |                 |
|------|--------------------------------------------------------------------|-------|------|---|---|---|-----------------|
| 4785 | GO_NEURAL_TUBE_FORMATION                                           | -0.83 | 0.08 | 0 | 0 | 0 | not significant |
| 4786 | GO_POSITIVE_REGULATION_OF_ACTIN_FILAMENT_POLYMERIZATION            | -0.83 | 0.08 | 0 | 0 | 0 | not significant |
| 4787 | SIG_PIP3_SIGNALING_IN_CARDIAC_MYOCYTES                             | -0.83 | 0.08 | 0 | 0 | 0 | not significant |
| 4788 | GO_NEGATIVE_REGULATION_OF_NEURON_APOPTOTIC_PROCESS                 | -0.83 | 0.07 | 0 | 0 | 0 | not significant |
| 4789 | GO_REGULATION_OF_ENDOCYTOSIS                                       | -0.83 | 0.05 | 0 | 0 | 0 | not significant |
| 4790 | GO_NEGATIVE_REGULATION_OF_CARDIOCYTE_DIFFERENTIATION               | -0.82 | 0.16 | 0 | 0 | 0 | not significant |
| 4791 | GO_NEGATIVE_REGULATION_OF_INFLAMMATORY_RESPONSE_TO_ANTIAGENIC_STIM | -0.82 | 0.16 | 0 | 0 | 0 | not significant |
| 4792 | GO_NEGATIVE_REGULATION_OF_KERATINOCYTE_PROLIFERATION               | -0.82 | 0.16 | 0 | 0 | 0 | not significant |
| 4793 | GO_POSITIVE_REGULATION_OF_MORPHOGENESIS_OF_AN_EPITHELIUM           | -0.82 | 0.16 | 0 | 0 | 0 | not significant |
| 4794 | GO_PROTON_TRANSPORTING_V_TYPE_ATPASE_V1_DOMAIN                     | -0.82 | 0.16 | 0 | 0 | 0 | not significant |
| 4795 | IZUKA_LIVER_CANCER_PROGRESSION_L1_G1_DN                            | -0.82 | 0.16 | 0 | 0 | 0 | not significant |
| 4796 | ZHU_SKIL_TARGETS_DN                                                | -0.82 | 0.16 | 0 | 0 | 0 | not significant |
| 4797 | GO_ALDEHYDE_CATABOLIC_PROCESS                                      | -0.82 | 0.15 | 0 | 0 | 0 | not significant |
| 4798 | GO_MHC_CLASS_I_PEPTIDE_LOADING_COMPLEX                             | -0.82 | 0.15 | 0 | 0 | 0 | not significant |
| 4799 | GO_NEGATIVE_REGULATION_OF_B_CELL_PROLIFERATION                     | -0.82 | 0.15 | 0 | 0 | 0 | not significant |
| 4800 | GO_OXIDOREDUCTASE_ACTIVITY_OXIDIZING_METAL_IONS                    | -0.82 | 0.15 | 0 | 0 | 0 | not significant |
| 4801 | GO_PHOSPHORYLATED_CARBOHYDRATE_DEPHOSPHORYLATION                   | -0.82 | 0.15 | 0 | 0 | 0 | not significant |
| 4802 | GO_REGULATION_OF_HISTONE_H2B_UBIQUITINATION                        | -0.82 | 0.15 | 0 | 0 | 0 | not significant |
| 4803 | GO_RETINA_MORPHOGENESIS_IN_CAMERA_TYPE_EYE                         | -0.82 | 0.15 | 0 | 0 | 0 | not significant |
| 4804 | GO_SCHWANN_CELL_DEVELOPMENT                                        | -0.82 | 0.15 | 0 | 0 | 0 | not significant |
| 4805 | GO_SULFURTRANSFERASE_ACTIVITY                                      | -0.82 | 0.15 | 0 | 0 | 0 | not significant |
| 4806 | GO_SYMMETRIC_SYNAPSE                                               | -0.82 | 0.15 | 0 | 0 | 0 | not significant |
| 4807 | GO_VITAMIN_TRANSMEMBRANE_TRANSPORTER_ACTIVITY                      | -0.82 | 0.15 | 0 | 0 | 0 | not significant |
| 4808 | REACTOME_PHOSPHATE_BOND_HYDROLYSIS_BY_NUOT_PROTEINS                | -0.82 | 0.15 | 0 | 0 | 0 | not significant |
| 4809 | REACTOME_PLATELET_CALCIIUM_HOMEOSTASIS                             | -0.82 | 0.15 | 0 | 0 | 0 | not significant |
| 4810 | BUCKANOVICH_T_LYMPHOCYTE_HOMING_ON_TUMOR_DN                        | -0.82 | 0.14 | 0 | 0 | 0 | not significant |
| 4811 | CHR6Q14                                                            | -0.82 | 0.14 | 0 | 0 | 0 | not significant |
| 4812 | GO_ACTIVATION_OF_PROTEIN_KINASE_A_ACTIVITY                         | -0.82 | 0.14 | 0 | 0 | 0 | not significant |
| 4813 | GO_EMBRYONIC_PATTERN_SPECIFICATION                                 | -0.82 | 0.14 | 0 | 0 | 0 | not significant |
| 4814 | GO_ENDOLYSOSOME                                                    | -0.82 | 0.14 | 0 | 0 | 0 | not significant |
| 4815 | GO_MICROFIBRIL                                                     | -0.82 | 0.14 | 0 | 0 | 0 | not significant |
| 4816 | REACTOME_ASSEMBLY_OF_THE_HIV_VIRION                                | -0.82 | 0.14 | 0 | 0 | 0 | not significant |
| 4817 | REACTOME_HYALURONAN_UPTAKE_AND_DEGRADATION                         | -0.82 | 0.14 | 0 | 0 | 0 | not significant |
| 4818 | REACTOME_JNK_C_JUN_KINASES_PHOSPHORYLATION_AND_ACTIVATION_MEDIATE  | -0.82 | 0.14 | 0 | 0 | 0 | not significant |
| 4819 | RICKMAN_HEAD_AND_NECK_CANCER_A                                     | -0.82 | 0.13 | 0 | 0 | 0 | not significant |
| 4820 | GO_POLYSOMAL_RIBOSOME                                              | -0.82 | 0.12 | 0 | 0 | 0 | not significant |
| 4821 | REACTOME_DEADENYLATION_OF_MRNA                                     | -0.82 | 0.12 | 0 | 0 | 0 | not significant |
| 4822 | REACTOME_METALLOPROTEASE_DUBS                                      | -0.82 | 0.12 | 0 | 0 | 0 | not significant |
| 4823 | CHEN_NEUROBLASTOMA_COPY_NUMBER_GAINS                               | -0.82 | 0.11 | 0 | 0 | 0 | not significant |
| 4824 | CHR1Q44                                                            | -0.82 | 0.11 | 0 | 0 | 0 | not significant |
| 4825 | GO_CYCLIN_DEPENDENT_PROTEIN_KINASE_ACTIVITY                        | -0.82 | 0.11 | 0 | 0 | 0 | not significant |
| 4826 | GO_NF_KAPPAB_BINDING                                               | -0.82 | 0.11 | 0 | 0 | 0 | not significant |
| 4827 | REACTOME_SIGNALING_BY_EGFR                                         | -0.82 | 0.11 | 0 | 0 | 0 | not significant |
| 4828 | GO_MORPHOGENESIS_OF_AN_EPITHELIAL_SHEET                            | -0.82 | 0.1  | 0 | 0 | 0 | not significant |
| 4829 | PID_KIT_PATHWAY                                                    | -0.82 | 0.1  | 0 | 0 | 0 | not significant |
| 4830 | GO_POSITIVE_REGULATION_OF_PROTEIN_LOCALIZATION_TO_MEMBRANE         | -0.82 | 0.07 | 0 | 0 | 0 | not significant |
| 4831 | CHR1P13                                                            | -0.82 | 0.06 | 0 | 0 | 0 | not significant |
| 4832 | GO_NUCLEOTIDE_EXCISION_REPAIR                                      | -0.82 | 0.06 | 0 | 0 | 0 | not significant |
| 4833 | GO_NEGATIVE_REGULATION_OF_NEURON_DEATH                             | -0.82 | 0.04 | 0 | 0 | 0 | not significant |
| 4834 | GO_ENDOSOMAL_TRANSPORT                                             | -0.82 | 0.01 | 0 | 0 | 0 | not significant |
| 4835 | GO_CELL_CELL_ADHESION_INVOLVED_IN_GASTRULATION                     | -0.81 | 0.17 | 0 | 0 | 0 | not significant |
| 4836 | CHR4P12                                                            | -0.81 | 0.16 | 0 | 0 | 0 | not significant |
| 4837 | GO_DORSAL_SPINAL_CORD_DEVELOPMENT                                  | -0.81 | 0.16 | 0 | 0 | 0 | not significant |
| 4838 | GO_POSITIVE_REGULATION_OF_NUCLEASE_ACTIVITY                        | -0.81 | 0.16 | 0 | 0 | 0 | not significant |
| 4839 | GO_SPINAL_CORD_PATTERNING                                          | -0.81 | 0.16 | 0 | 0 | 0 | not significant |
| 4840 | MIKHAYLOVA_OXIDATIVE_STRESS_RESPONSE_VIA_VHL_UP                    | -0.81 | 0.16 | 0 | 0 | 0 | not significant |
| 4841 | GO_AMINO_ACID_SALVAGE                                              | -0.81 | 0.15 | 0 | 0 | 0 | not significant |
| 4842 | GO_CERAMIDE_TRANSPORT                                              | -0.81 | 0.15 | 0 | 0 | 0 | not significant |
| 4843 | GO_EXTRINSIC_COMPONENT_OF_MITOCHONDRIAL_INNER_MEMBRANE             | -0.81 | 0.15 | 0 | 0 | 0 | not significant |
| 4844 | GO_GATOR1_COMPLEX                                                  | -0.81 | 0.15 | 0 | 0 | 0 | not significant |
| 4845 | GO_INTERMEDIATE_FILAMENT_BINDING                                   | -0.81 | 0.15 | 0 | 0 | 0 | not significant |
| 4846 | GO_POSITIVE_REGULATION_OF_PROTEIN_DEUBIQUITINATION                 | -0.81 | 0.15 | 0 | 0 | 0 | not significant |
| 4847 | GO_PROTEIN_LOCALIZATION_TO_CILIARY_MEMBRANE                        | -0.81 | 0.15 | 0 | 0 | 0 | not significant |
| 4848 | GO_PROTEIN_LOCALIZATION_TO_EARLY_ENDOSOME                          | -0.81 | 0.15 | 0 | 0 | 0 | not significant |
| 4849 | GO_REGULATION_OF_CELLULAR_RESPONSE_TO_HYPOXIA                      | -0.81 | 0.15 | 0 | 0 | 0 | not significant |
| 4850 | GO_REGULATION_OF_HELICASE_ACTIVITY                                 | -0.81 | 0.15 | 0 | 0 | 0 | not significant |
| 4851 | HOFMANN_MYELODYPLASTIC_SYNDROM_RISK_UP                             | -0.81 | 0.15 | 0 | 0 | 0 | not significant |
| 4852 | KIM_RESPONSE_TO_TSA_AND_DECITABINE_DN                              | -0.81 | 0.15 | 0 | 0 | 0 | not significant |
| 4853 | BAKER_HEMATOPOIESIS_STAT1_TARGETS                                  | -0.81 | 0.14 | 0 | 0 | 0 | not significant |
| 4854 | GO_ALPHA_TUBULIN_BINDING                                           | -0.81 | 0.14 | 0 | 0 | 0 | not significant |
| 4855 | GO_CELLULAR_RESPONSE_TO_NITROSATIVE_STRESS                         | -0.81 | 0.14 | 0 | 0 | 0 | not significant |
| 4856 | GO_DENDRITIC_CELL_ANTIEN_PROCESSING_AND_PRESENTATION               | -0.81 | 0.14 | 0 | 0 | 0 | not significant |
| 4857 | GO_GUANYLYLTRANSFERASE_ACTIVITY                                    | -0.81 | 0.14 | 0 | 0 | 0 | not significant |
| 4858 | GO_HYPEROSMOTIC_RESPONSE                                           | -0.81 | 0.14 | 0 | 0 | 0 | not significant |
| 4859 | GO_REGULATION_OF_DENDRITIC_SPINE_MAINTENANCE                       | -0.81 | 0.14 | 0 | 0 | 0 | not significant |
| 4860 | GO_RESPONSE_TO_INTERLEUKIN_6                                       | -0.81 | 0.14 | 0 | 0 | 0 | not significant |
| 4861 | GO_SPLICEOSOMAL_CONFORMATIONAL_CHANGES_TO_GENERATE_CATALYTIC_C     | -0.81 | 0.14 | 0 | 0 | 0 | not significant |
| 4862 | GO_STRESS_GRANULE_ASSEMBLY                                         | -0.81 | 0.14 | 0 | 0 | 0 | not significant |
| 4863 | GO_SUMO_TRANSFERASE_ACTIVITY                                       | -0.81 | 0.14 | 0 | 0 | 0 | not significant |
| 4864 | REACTOME_2_LTR_CIRCLE_FORMATION                                    | -0.81 | 0.14 | 0 | 0 | 0 | not significant |
| 4865 | REACTOME_NF_KB_ACTIVATION_THROUGH_FADD_RIP_1_PATHWAY_MEDIATED_BY   | -0.81 | 0.14 | 0 | 0 | 0 | not significant |
| 4866 | CHR2Q12                                                            | -0.81 | 0.13 | 0 | 0 | 0 | not significant |
| 4867 | GO_POSITIVE_REGULATION_OF_MUSCLE_HYPERTROPHY                       | -0.81 | 0.13 | 0 | 0 | 0 | not significant |
| 4868 | REACTOME_MRNA_DECAY_BY_5_TO_3_EXORIBONUCLEASE                      | -0.81 | 0.13 | 0 | 0 | 0 | not significant |
| 4869 | GO_NEUROPEPTIDE_SIGNALING_PATHWAY                                  | -0.81 | 0.12 | 0 | 0 | 0 | not significant |
| 4870 | GO_POSITIVE_REGULATION_OF_REACTIVE_OXYGEN_SPECIES_METABOLIC_PROCF  | -0.81 | 0.12 | 0 | 0 | 0 | not significant |
| 4871 | REACTOME_FCERI_MEDIATED_CAPLUS2_MOBILIZATION                       | -0.81 | 0.12 | 0 | 0 | 0 | not significant |
| 4872 | GO_CLATHRIN_ADAPTOR_COMPLEX                                        | -0.81 | 0.11 | 0 | 0 | 0 | not significant |
| 4873 | GO_CLATHRIN_COAT                                                   | -0.81 | 0.11 | 0 | 0 | 0 | not significant |
| 4874 | CHR6Q25                                                            | -0.81 | 0.1  | 0 | 0 | 0 | not significant |
| 4875 | CHRXF22                                                            | -0.81 | 0.1  | 0 | 0 | 0 | not significant |
| 4876 | CROONQUIST_NRAS_VS_STROMAL_STIMULATION_UP                          | -0.81 | 0.1  | 0 | 0 | 0 | not significant |
| 4877 | GO_CELLULAR_CARBOHYDRATE_CATABOLIC_PROCESS                         | -0.81 | 0.1  | 0 | 0 | 0 | not significant |
| 4878 | GO_O_ACYLTRANSFERASE_ACTIVITY                                      | -0.81 | 0.1  | 0 | 0 | 0 | not significant |
| 4879 | GO_EMBRYONIC_SKELETAL_SYSTEM_MORPHOGENESIS                         | -0.81 | 0.09 | 0 | 0 | 0 | not significant |
| 4880 | GO_REGULATION_OF_MONOOXYGENASE_ACTIVITY                            | -0.81 | 0.09 | 0 | 0 | 0 | not significant |
| 4881 | GO_REGULATION_OF_SODIUM_ION_TRANSPORT                              | -0.81 | 0.09 | 0 | 0 | 0 | not significant |
| 4882 | JOSEPH_RESPONSE_TO_SODIUM_BUTYRATE_DN                              | -0.81 | 0.09 | 0 | 0 | 0 | not significant |
| 4883 | GO_REGULATION_OF_ACTIN_FILAMENT_BUNDLE_ASSEMBLY                    | -0.81 | 0.08 | 0 | 0 | 0 | not significant |
| 4884 | GO_INTRACILIARY_TRANSPORT                                          | -0.81 | 0.07 | 0 | 0 | 0 | not significant |
| 4885 | ICHIBA_GRAFT_VERSUS_HOST_DISEASE_35D_UP                            | -0.81 | 0.06 | 0 | 0 | 0 | not significant |
| 4886 | GO_TRANSITION_METAL_ION_HOMEOSTASIS                                | -0.81 | 0.04 | 0 | 0 | 0 | not significant |
| 4887 | GO_CHROMOSOME_TELOMERIC_REGION                                     | -0.81 | 0.03 | 0 | 0 | 0 | not significant |
| 4888 | GO_COENZYME_BIOSYNTHETIC_PROCESS                                   | -0.81 | 0.03 | 0 | 0 | 0 | not significant |
| 4889 | GO_REGULATION_OF_AMINO_ACID_TRANSMEMBRANE_TRANSPORT                | -0.80 | 0.16 | 0 | 0 | 0 | not significant |
| 4890 | GO_GLUCOSAMINE_CONTAINING_COMPOUND_METABOLIC_PROCESS               | -0.80 | 0.15 | 0 | 0 | 0 | not significant |
| 4891 | GO_NEGATIVE_REGULATION_OF_POTASSIUM_ION_TRANSMEMBRANE_TRANSPORT    | -0.80 | 0.15 | 0 | 0 | 0 | not significant |
| 4892 | GO_NEPHRON_TUBULE_EPITHELIAL_CELL_DIFFERENTIATION                  | -0.80 | 0.15 | 0 | 0 | 0 | not significant |
| 4893 | GO_OXIDOREDUCTASE_ACTIVITY_ACTING_ON_DIPHENOLS_AND_RELATED_SUBST/  | -0.80 | 0.15 | 0 | 0 | 0 | not significant |

|      |                                                                       |       |      |   |   |   |                 |
|------|-----------------------------------------------------------------------|-------|------|---|---|---|-----------------|
| 4894 | GO_PROTEIN_NITROSYLATION                                              | -0.80 | 0.15 | 0 | 0 | 0 | not significant |
| 4895 | REACTOME_IRAK4_DEFICIENCY_TLR2_4                                      | -0.80 | 0.15 | 0 | 0 | 0 | not significant |
| 4896 | GO_CELLULAR_RESPONSE_TO_SALT_STRESS                                   | -0.80 | 0.14 | 0 | 0 | 0 | not significant |
| 4897 | GO_CEREBELLAR_CORTEX_FORMATION                                        | -0.80 | 0.14 | 0 | 0 | 0 | not significant |
| 4898 | GO_CILIARY_TRANSITION_FIBER                                           | -0.80 | 0.14 | 0 | 0 | 0 | not significant |
| 4899 | GO_FOREBRAIN_MORPHOGENESIS                                            | -0.80 | 0.14 | 0 | 0 | 0 | not significant |
| 4900 | GO_NEGATIVE_REGULATION_OF_DNA_TEMPLATED_TRANSCRIPTION_ELONGATION      | -0.80 | 0.14 | 0 | 0 | 0 | not significant |
| 4901 | GO_NEUROTROPHIN_RECEPTOR_BINDING                                      | -0.80 | 0.14 | 0 | 0 | 0 | not significant |
| 4902 | GO_POSITIVE_REGULATION_OF_FIBROBLAST_MIGRATION                        | -0.80 | 0.14 | 0 | 0 | 0 | not significant |
| 4903 | GO_PROTEIN_DISULFIDE_OXIDOREDUCTASE_ACTIVITY                          | -0.80 | 0.14 | 0 | 0 | 0 | not significant |
| 4904 | GO_REGULATION_OF_PROTEIN_MONOUBIQUITINATION                           | -0.80 | 0.14 | 0 | 0 | 0 | not significant |
| 4905 | GO_RNA_SECONDARY_STRUCTURE_UNWINDING                                  | -0.80 | 0.14 | 0 | 0 | 0 | not significant |
| 4906 | GO_SOLUTE_PROTON_ANTIPORTER_ACTIVITY                                  | -0.80 | 0.14 | 0 | 0 | 0 | not significant |
| 4907 | GO_UDP_XYLOSYLTRANSFERASE_ACTIVITY                                    | -0.80 | 0.14 | 0 | 0 | 0 | not significant |
| 4908 | NIELSEN_LEIOMYOSARCOMA_CN11_DN                                        | -0.80 | 0.14 | 0 | 0 | 0 | not significant |
| 4909 | REACTOME_PRESYNAPTIC_FUNCTION_OF_KAINATE_RECEPTORS                    | -0.80 | 0.14 | 0 | 0 | 0 | not significant |
| 4910 | REACTOME_REGULATION_OF_FZD_BY_UBIQUITINATION                          | -0.80 | 0.14 | 0 | 0 | 0 | not significant |
| 4911 | VERRECCHIA_RESPONSE_TO_TGFB1_C1                                       | -0.80 | 0.14 | 0 | 0 | 0 | not significant |
| 4912 | WORSCHER_TUMOR_EVASION_AND_TOLEROGENTICITY_UP                         | -0.80 | 0.14 | 0 | 0 | 0 | not significant |
| 4913 | CREIGHTON_AKT1_SIGNALING_VIA_MTOR_DN                                  | -0.80 | 0.13 | 0 | 0 | 0 | not significant |
| 4914 | GO_CELLULAR_RESPONSE_TO_EXOGENOUS_DSRNA                               | -0.80 | 0.13 | 0 | 0 | 0 | not significant |
| 4915 | GO_HYALURONAN_CATABOLIC_PROCESS                                       | -0.80 | 0.13 | 0 | 0 | 0 | not significant |
| 4916 | GO_PROTON_TRANSPORTING_TWO_SECTOR_ATPASE_COMPLEX_CATALYTIC_DO         | -0.80 | 0.13 | 0 | 0 | 0 | not significant |
| 4917 | GO_REGULATION_OF_NEURON_MIGRATION                                     | -0.80 | 0.13 | 0 | 0 | 0 | not significant |
| 4918 | GO_REGULATION_OF_OSTEOCLAST_DEVELOPMENT                               | -0.80 | 0.13 | 0 | 0 | 0 | not significant |
| 4919 | GO_UBIQUITIN_LIGASE_INHIBITOR_ACTIVITY                                | -0.80 | 0.13 | 0 | 0 | 0 | not significant |
| 4920 | LEE_LIVER_CANCER                                                      | -0.80 | 0.13 | 0 | 0 | 0 | not significant |
| 4921 | NIELSEN_LEIOMYOSARCOMA_DN                                             | -0.80 | 0.13 | 0 | 0 | 0 | not significant |
| 4922 | GO_DETECTION_OF_VISIBLE_LIGHT                                         | -0.80 | 0.12 | 0 | 0 | 0 | not significant |
| 4923 | GO_POSITIVE_REGULATION_OF_SYNAPSE_ASSEMBLY                            | -0.80 | 0.12 | 0 | 0 | 0 | not significant |
| 4924 | GO_REGULATION_OF_RESPONSE_TO_EXTRACELLULAR_STIMULUS                   | -0.80 | 0.12 | 0 | 0 | 0 | not significant |
| 4925 | PID_CIRCADIAN_PATHWAY                                                 | -0.80 | 0.12 | 0 | 0 | 0 | not significant |
| 4926 | BIOPARTA_CHEMICAL_PATHWAY                                             | -0.80 | 0.11 | 0 | 0 | 0 | not significant |
| 4927 | GARGALOVIC_RESPONSE_TO_OXIDIZED_PHOSPHOLIPIDS_MAGENTA_UP              | -0.80 | 0.11 | 0 | 0 | 0 | not significant |
| 4928 | GARGALOVIC_RESPONSE_TO_OXIDIZED_PHOSPHOLIPIDS_RED_DN                  | -0.80 | 0.11 | 0 | 0 | 0 | not significant |
| 4929 | GO_DEVELOPMENTAL_PIGMENTATION                                         | -0.80 | 0.11 | 0 | 0 | 0 | not significant |
| 4930 | GO_HISTONE_METHYLTRANSFERASE_ACTIVITY_H3_K4_SPECIFIC                  | -0.80 | 0.11 | 0 | 0 | 0 | not significant |
| 4931 | GO_REGULATION_OF_ANDROGEN_RECEPTOR_SIGNALING_PATHWAY                  | -0.80 | 0.11 | 0 | 0 | 0 | not significant |
| 4932 | GO_CELLULAR_IRON_ION_HOMEOSTASIS                                      | -0.80 | 0.1  | 0 | 0 | 0 | not significant |
| 4933 | REACTOME_IRON_UPTAKE_AND_TRANSPORT                                    | -0.80 | 0.1  | 0 | 0 | 0 | not significant |
| 4934 | ROY_WOUND_BLOOD_VESSEL_UP                                             | -0.80 | 0.1  | 0 | 0 | 0 | not significant |
| 4935 | BOYLAN_MULTIPLE_MYELOMA_C_CLUSTER_UP                                  | -0.80 | 0.09 | 0 | 0 | 0 | not significant |
| 4936 | GO_POSITIVE_REGULATION_OF_MUSCLE_TISSUE_DEVELOPMENT                   | -0.80 | 0.09 | 0 | 0 | 0 | not significant |
| 4937 | REACTOME_SUMOYLATION_OF_TRANSCRIPTION_COFACTORS                       | -0.80 | 0.09 | 0 | 0 | 0 | not significant |
| 4938 | GO_CILIARY_TIP                                                        | -0.80 | 0.08 | 0 | 0 | 0 | not significant |
| 4939 | GO_CRANIAL_SKELETAL_SYSTEM_DEVELOPMENT                                | -0.80 | 0.08 | 0 | 0 | 0 | not significant |
| 4940 | KEGG_NON_SMALL_CELL_LUNG_CANCER                                       | -0.80 | 0.08 | 0 | 0 | 0 | not significant |
| 4941 | REACTOME_RET_SIGNALING                                                | -0.80 | 0.08 | 0 | 0 | 0 | not significant |
| 4942 | GO_REGULATION_OF_POSTSYNAPTIC_MEMBRANE_POTENTIAL                      | -0.80 | 0.07 | 0 | 0 | 0 | not significant |
| 4943 | KANG_IMMORTALIZED_BY_TERT_UP                                          | -0.80 | 0.07 | 0 | 0 | 0 | not significant |
| 4944 | REACTOME_RETROGRADE_TRANSPORT_AT_THE_TRANS_GOLGI_NETWORK              | -0.80 | 0.07 | 0 | 0 | 0 | not significant |
| 4945 | PID_TCR_PATHWAY                                                       | -0.80 | 0.06 | 0 | 0 | 0 | not significant |
| 4946 | REACTOME_COMPLEX_I_BIOGENESIS                                         | -0.80 | 0.06 | 0 | 0 | 0 | not significant |
| 4947 | GO_NADH_DEHYDROGENASE_COMPLEX_ASSEMBLY                                | -0.80 | 0.05 | 0 | 0 | 0 | not significant |
| 4948 | GO_REGULATION_OF_ACTIN_FILAMENT_ORGANIZATION                          | -0.80 | 0.01 | 0 | 0 | 0 | not significant |
| 4949 | GO_CILIARY_PART                                                       | -0.80 | 0    | 0 | 0 | 0 | not significant |
| 4950 | GO_NEGATIVE_REGULATION_OF_CENTRIOLE_REPLICATION                       | -0.79 | 0.15 | 0 | 0 | 0 | not significant |
| 4951 | GO_NEGATIVE_REGULATION_OF_MULTICELLULAR_ORGANISM_GROWTH               | -0.79 | 0.15 | 0 | 0 | 0 | not significant |
| 4952 | GO_REGULATION_OF_NEURON_MATURATION                                    | -0.79 | 0.15 | 0 | 0 | 0 | not significant |
| 4953 | REACTOME_GPIB_IX_V_ACTIVATION_SIGNALING                               | -0.79 | 0.15 | 0 | 0 | 0 | not significant |
| 4954 | ABDULRAHMAN_KIDNEY_CANCER_VH1_DN                                      | -0.79 | 0.14 | 0 | 0 | 0 | not significant |
| 4955 | CORRADETTI_MTOR_PATHWAY_REGULATORS_DN                                 | -0.79 | 0.14 | 0 | 0 | 0 | not significant |
| 4956 | GO_HEART_FIELD_SPECIFICATION                                          | -0.79 | 0.14 | 0 | 0 | 0 | not significant |
| 4957 | GO_NEGATIVE_REGULATION_OF_INTRACELLULAR_ESTROGEN_RECEPTOR_SIGNALING   | -0.79 | 0.14 | 0 | 0 | 0 | not significant |
| 4958 | KEGG_PRIMARY_BILE_ACID_BIOSYNTHESIS                                   | -0.79 | 0.14 | 0 | 0 | 0 | not significant |
| 4959 | PETRETTO_LEFT_VENTRICLE_MASS_QTL_CIS_DN                               | -0.79 | 0.14 | 0 | 0 | 0 | not significant |
| 4960 | BARRIER_CANCER_RELAPSE_TUMOR_SAMPLE_DN                                | -0.79 | 0.13 | 0 | 0 | 0 | not significant |
| 4961 | CHR13Q21                                                              | -0.79 | 0.13 | 0 | 0 | 0 | not significant |
| 4962 | DING_LUNG_CANCER_MUTATED_FREQUENTLY                                   | -0.79 | 0.13 | 0 | 0 | 0 | not significant |
| 4963 | GO_PHOSPHATIDYLGLYCEROL_BIOSYNTHETIC_PROCESS                          | -0.79 | 0.13 | 0 | 0 | 0 | not significant |
| 4964 | GO_PHOSPHATIDYLINOSITOL_5_PHOSPHATE_BINDING                           | -0.79 | 0.13 | 0 | 0 | 0 | not significant |
| 4965 | GO_POSITIVE_REGULATION_OF_MACROPHAGE_ACTIVATION                       | -0.79 | 0.13 | 0 | 0 | 0 | not significant |
| 4966 | GO_POSITIVE_REGULATION_OF_PROTEIN_DEPOLYMERIZATION                    | -0.79 | 0.13 | 0 | 0 | 0 | not significant |
| 4967 | GO_PROTEIN_LOCALIZATION_TO_MEMBRANE_RAFT                              | -0.79 | 0.13 | 0 | 0 | 0 | not significant |
| 4968 | GO_U4_SNRNA_3_END_PROCESSING                                          | -0.79 | 0.13 | 0 | 0 | 0 | not significant |
| 4969 | LI_WILMS_TUMOR_ANAPLASTIC_DN                                          | -0.79 | 0.13 | 0 | 0 | 0 | not significant |
| 4970 | MARXS_ACETYLATED_NON_HISTONE_PROTEINS                                 | -0.79 | 0.13 | 0 | 0 | 0 | not significant |
| 4971 | MURAKAMI_UV_RESPONSE_1HR_UP                                           | -0.79 | 0.13 | 0 | 0 | 0 | not significant |
| 4972 | REACTOME_ACTIVATION_OF_THE_TFAP2_AP_2_FAMILY_OF_TRANSCRIPTION_FACTORS | -0.79 | 0.13 | 0 | 0 | 0 | not significant |
| 4973 | REACTOME_GAB1_SIGNALOSOME                                             | -0.79 | 0.13 | 0 | 0 | 0 | not significant |
| 4974 | REACTOME_PD_1_SIGNALING                                               | -0.79 | 0.13 | 0 | 0 | 0 | not significant |
| 4975 | DAWSON_METHYLATED_IN_LYMPHOMA_TCL1                                    | -0.79 | 0.12 | 0 | 0 | 0 | not significant |
| 4976 | GO_BRANCHING_INVOLVED_IN_BLOOD_VESSEL_MORPHOGENESIS                   | -0.79 | 0.12 | 0 | 0 | 0 | not significant |
| 4977 | GO_CLATHRIN_COATED_ENDOCYTIC_VESICLE                                  | -0.79 | 0.12 | 0 | 0 | 0 | not significant |
| 4978 | GO GRANULOCYTE DIFFERENTIATION                                        | -0.79 | 0.12 | 0 | 0 | 0 | not significant |
| 4979 | GO_NATURAL_KILLER_CELL_DEGRANULATION                                  | -0.79 | 0.12 | 0 | 0 | 0 | not significant |
| 4980 | MOOTHA_GLYCOGEN_METABOLISM                                            | -0.79 | 0.12 | 0 | 0 | 0 | not significant |
| 4981 | PID_NETRIN_PATHWAY                                                    | -0.79 | 0.12 | 0 | 0 | 0 | not significant |
| 4982 | REACTOME_INLA_MEDIATED_ENTRY_OF_LISTERIA_MONOCYTOGENES_INTO_HOST      | -0.79 | 0.12 | 0 | 0 | 0 | not significant |
| 4983 | REACTOME_LISTERIA_MONOCYTOGENES_ENTRY_INTO_HOST_CELLS                 | -0.79 | 0.12 | 0 | 0 | 0 | not significant |
| 4984 | GO_REGULATION_OF_DNA_DAMAGE_RESPONSE_SIGNAL_TRANSDUCTION_BY_P53       | -0.79 | 0.11 | 0 | 0 | 0 | not significant |
| 4985 | GO_REGULATION_OF_NEUTROPHIL_MIGRATION                                 | -0.79 | 0.11 | 0 | 0 | 0 | not significant |
| 4986 | GO_REGULATION_OF_TRIGLYCERIDE_BIOSYNTHETIC_PROCESS                    | -0.79 | 0.11 | 0 | 0 | 0 | not significant |
| 4987 | GO_SH2_DOMAIN_BINDING                                                 | -0.79 | 0.11 | 0 | 0 | 0 | not significant |
| 4988 | PID_IL8_CXCR1_PATHWAY                                                 | -0.79 | 0.11 | 0 | 0 | 0 | not significant |
| 4989 | GAZDA_DIAMOND_BLACKFAN_ANEMIA_MYELOID_UP                              | -0.79 | 0.1  | 0 | 0 | 0 | not significant |
| 4990 | GO_N_TERMINAL_PROTEIN_AMINO_ACID_MODIFICATION                         | -0.79 | 0.09 | 0 | 0 | 0 | not significant |
| 4991 | GO_POSITIVE_REGULATION_OF_INTRINSIC_APOPTOTIC_SIGNALING_PATHWAY       | -0.79 | 0.09 | 0 | 0 | 0 | not significant |
| 4992 | GO_AMINOPEPTIDASE_ACTIVITY                                            | -0.79 | 0.08 | 0 | 0 | 0 | not significant |
| 4993 | ZHU_CMV_24_HR_DN                                                      | -0.79 | 0.08 | 0 | 0 | 0 | not significant |
| 4994 | GO_CAMERA_TYPE_EYE_MORPHOGENESIS                                      | -0.79 | 0.07 | 0 | 0 | 0 | not significant |
| 4995 | GO_RESPONSE_TO_ACTIVITY                                               | -0.79 | 0.07 | 0 | 0 | 0 | not significant |
| 4996 | KONDO_PROSTATE_CANCER_HCP_WITH_H3K27ME3                               | -0.79 | 0.07 | 0 | 0 | 0 | not significant |
| 4997 | PID_VEGFR1_2_PATHWAY                                                  | -0.79 | 0.07 | 0 | 0 | 0 | not significant |
| 4998 | REACTOME_CA2PLUS_PATHWAY                                              | -0.79 | 0.07 | 0 | 0 | 0 | not significant |
| 4999 | REACTOME_CARGO_TRAFFICKING_TO_THE_PERICILIARY_MEMBRANE                | -0.79 | 0.07 | 0 | 0 | 0 | not significant |
| 5000 | REACTOME_ECCC8_CSB_AND_EHMT2_G9A_POSITIVELY_REGULATE_RRNA_EXPRESSION  | -0.79 | 0.07 | 0 | 0 | 0 | not significant |
| 5001 | GO_BETA_CATENIN_BINDING                                               | -0.79 | 0.06 | 0 | 0 | 0 | not significant |
| 5002 | GO_POLYOL_METABOLIC_PROCESS                                           | -0.79 | 0.06 | 0 | 0 | 0 | not significant |

|      |                                                                      |       |      |   |   |   |                 |
|------|----------------------------------------------------------------------|-------|------|---|---|---|-----------------|
| 5003 | GO_REGULATION_OF_SMOOTHENED_SIGNALING_PATHWAY                        | -0.79 | 0.06 | 0 | 0 | 0 | not significant |
| 5004 | GO_TIGHT_JUNCTION                                                    | -0.79 | 0.05 | 0 | 0 | 0 | not significant |
| 5005 | GO_VESICLE_MEDIATED_TRANSPORT_TO_THE_PLASMA_MEMBRANE                 | -0.79 | 0.04 | 0 | 0 | 0 | not significant |
| 5006 | GO_SKELETAL_SYSTEM_MORPHOGENESIS                                     | -0.79 | 0.03 | 0 | 0 | 0 | not significant |
| 5007 | GO_RESPONSE_TO_DEFENSES_OF_OTHER_ORGANISM_INVOLVED_IN_SYMBIOTIC_     | -0.78 | 0.15 | 0 | 0 | 0 | not significant |
| 5008 | GO_NEGATIVE_REGULATION_OF_DENDRITE_MORPHOGENESIS                     | -0.78 | 0.14 | 0 | 0 | 0 | not significant |
| 5009 | BERENJENO_TRANSFORMED_BY_RHOA_REVERSIBLY_UP                          | -0.78 | 0.13 | 0 | 0 | 0 | not significant |
| 5010 | BIOCARTA_ECM_PATHWAY                                                 | -0.78 | 0.13 | 0 | 0 | 0 | not significant |
| 5011 | BIOCARTA_UCALPAIN_PATHWAY                                            | -0.78 | 0.13 | 0 | 0 | 0 | not significant |
| 5012 | DING_LUNG_CANCER_MUTATED_RECURRENTLY                                 | -0.78 | 0.13 | 0 | 0 | 0 | not significant |
| 5013 | GO_DENDRITIC_CELL_CYTOKINE_PRODUCTION                                | -0.78 | 0.13 | 0 | 0 | 0 | not significant |
| 5014 | GO_G_PROTEIN_COUPLED_RECEPTOR_INTERNALIZATION                        | -0.78 | 0.13 | 0 | 0 | 0 | not significant |
| 5015 | GO_HYALURONAN_BIOSYNTHETIC_PROCESS                                   | -0.78 | 0.13 | 0 | 0 | 0 | not significant |
| 5016 | GO_L_METHIONINE_SALVAGE_FROM_METHYLTHIOADENOSINE                     | -0.78 | 0.13 | 0 | 0 | 0 | not significant |
| 5017 | GO_MALE_GERM_CELL_NUCLEUS                                            | -0.78 | 0.13 | 0 | 0 | 0 | not significant |
| 5018 | GO_NATURAL_KILLER_CELL_ACTIVATION_INVOLVED_IN_IMMUNE_RESPONSE        | -0.78 | 0.13 | 0 | 0 | 0 | not significant |
| 5019 | GO_NEGATIVE_REGULATION_OF_SODIUM_ION_TRANSPORT                       | -0.78 | 0.13 | 0 | 0 | 0 | not significant |
| 5020 | GO_PEPTIDYL_PROLINE_DIOXYGENASE_ACTIVITY                             | -0.78 | 0.13 | 0 | 0 | 0 | not significant |
| 5021 | GO_REGULATION_OF_EPITHELIAL_CELL_DIFFERENTIATION_INVOLVED_IN_KIDNEY_ | -0.78 | 0.13 | 0 | 0 | 0 | not significant |
| 5022 | GO_RNAL_EFFECTOR_COMPLEX                                             | -0.78 | 0.13 | 0 | 0 | 0 | not significant |
| 5023 | GO_SECONDARY_HEART_FIELD_SPECIFICATION                               | -0.78 | 0.13 | 0 | 0 | 0 | not significant |
| 5024 | KONDO_HYPOXIA                                                        | -0.78 | 0.13 | 0 | 0 | 0 | not significant |
| 5025 | REACTOME_ALPHA_OXIDATION_OF_PHTANATE                                 | -0.78 | 0.13 | 0 | 0 | 0 | not significant |
| 5026 | REACTOME_GLYCOGEN_STORAGE_DISEASES                                   | -0.78 | 0.13 | 0 | 0 | 0 | not significant |
| 5027 | REACTOME_IONOTROPIC_ACTIVITY_OF_KAINATE_RECEPTORS                    | -0.78 | 0.13 | 0 | 0 | 0 | not significant |
| 5028 | GO_CYTIDINE_TO_URIDINE_EDITING                                       | -0.78 | 0.12 | 0 | 0 | 0 | not significant |
| 5029 | GO_EIF2ALPHA_PHOSPHORYLATION_IN_RESPONSE_TO_ENDOPLASMIC_RETICULUM    | -0.78 | 0.12 | 0 | 0 | 0 | not significant |
| 5030 | GO_MITOCHONDRIAL_FRAGMENTATION_INVOLVED_IN_APOPTOTIC_PROCESS         | -0.78 | 0.12 | 0 | 0 | 0 | not significant |
| 5031 | GO_NEGATIVE_REGULATION_OF_SMOOTH_MUSCLE_CELL_MIGRATION               | -0.78 | 0.12 | 0 | 0 | 0 | not significant |
| 5032 | GO_NUCLEAR_TRANSCRIBED_MRNA_CATABOLIC_PROCESS_EXONUCLEOLYTIC_3       | -0.78 | 0.12 | 0 | 0 | 0 | not significant |
| 5033 | GO_REGULATION_OF_PROTEIN_DEUBIQUITINATION                            | -0.78 | 0.12 | 0 | 0 | 0 | not significant |
| 5034 | GO_SEQUESTERING_OF_METAL_ION                                         | -0.78 | 0.12 | 0 | 0 | 0 | not significant |
| 5035 | GO_SMOOTH_MUSCLE_TISSUE_DEVELOPMENT                                  | -0.78 | 0.12 | 0 | 0 | 0 | not significant |
| 5036 | GO_UBIQUITINATION LIKE MODIFICATION DEPENDENT PROTEIN BINDING        | -0.78 | 0.12 | 0 | 0 | 0 | not significant |
| 5037 | REACTOME_SUMOYLATION_OF_DNA_METHYLATION_PROTEINS                     | -0.78 | 0.12 | 0 | 0 | 0 | not significant |
| 5038 | REACTOME_TRAF6_MEDIATED_INDUCION_OF_TAK1_COMPLEX_WITHIN_TLR4_CO      | -0.78 | 0.12 | 0 | 0 | 0 | not significant |
| 5039 | GO_THREONINE_TYPE_PEPTIDASE_ACTIVITY                                 | -0.78 | 0.11 | 0 | 0 | 0 | not significant |
| 5040 | WINNENPENNINCKX_MELANOMA_METASTASIS_DN                               | -0.78 | 0.11 | 0 | 0 | 0 | not significant |
| 5041 | GO_BLASTOCYST_GROWTH                                                 | -0.78 | 0.1  | 0 | 0 | 0 | not significant |
| 5042 | PID_HDAC_CLASSIII_PATHWAY                                            | -0.78 | 0.1  | 0 | 0 | 0 | not significant |
| 5043 | SATO_SILENCED_BY_DEACETYLATION_IN_PANCREATIC_CANCER                  | -0.78 | 0.1  | 0 | 0 | 0 | not significant |
| 5044 | GO_ANIMAL_ORGAN_FORMATION                                            | -0.78 | 0.09 | 0 | 0 | 0 | not significant |
| 5045 | GO_AORTA_DEVELOPMENT                                                 | -0.78 | 0.09 | 0 | 0 | 0 | not significant |
| 5046 | GO_BETA_TUBULIN_BINDING                                              | -0.78 | 0.09 | 0 | 0 | 0 | not significant |
| 5047 | REACTOME_MTORC1_MEDIATED_SIGNALING                                   | -0.78 | 0.08 | 0 | 0 | 0 | not significant |
| 5048 | GO_PDZ_DOMAIN_BINDING                                                | -0.78 | 0.07 | 0 | 0 | 0 | not significant |
| 5049 | GO_NEURON_SPINE                                                      | -0.78 | 0.05 | 0 | 0 | 0 | not significant |
| 5050 | GO_REGULATION_OF_ACTOMYOSIN_STRUCTURE_ORGANIZATION                   | -0.78 | 0.05 | 0 | 0 | 0 | not significant |
| 5051 | GO_REGULATION_OF_G_PROTEIN_COUPLED_RECEPTOR_SIGNALING_PATHWAY        | -0.78 | 0.05 | 0 | 0 | 0 | not significant |
| 5052 | BIOCARTA_GABA_PATHWAY                                                | -0.77 | 0.13 | 0 | 0 | 0 | not significant |
| 5053 | BIOCARTA_TRKA_PATHWAY                                                | -0.77 | 0.12 | 0 | 0 | 0 | not significant |
| 5054 | GO_CHEMICAL_HOMEOSTASIS_WITHIN_A_TISSUE                              | -0.77 | 0.12 | 0 | 0 | 0 | not significant |
| 5055 | GO_MEMBRANE_DEPOLARIZATION_DURING_ACTION_POTENTIAL                   | -0.77 | 0.12 | 0 | 0 | 0 | not significant |
| 5056 | GO_NEGATIVE_REGULATION_OF_NUCLEOCYTOPLASMIC_TRANSPORT                | -0.77 | 0.12 | 0 | 0 | 0 | not significant |
| 5057 | GO_OSTEOCLAST_DEVELOPMENT                                            | -0.77 | 0.12 | 0 | 0 | 0 | not significant |
| 5058 | GO_POSITIVE_REGULATION_OF_CELL_PROLIFERATION_INVOLVED_IN_HEART_MOF   | -0.77 | 0.12 | 0 | 0 | 0 | not significant |
| 5059 | GO_REGULATION_OF_CELLULAR_CARBOHYDRATE_CATABOLIC_PROCESS             | -0.77 | 0.12 | 0 | 0 | 0 | not significant |
| 5060 | GO_REGULATION_OF_LAMELLIPODIUM_MORPHOGENESIS                         | -0.77 | 0.12 | 0 | 0 | 0 | not significant |
| 5061 | GO_REGULATION_OF_MEMBRANE_TUBULATION                                 | -0.77 | 0.12 | 0 | 0 | 0 | not significant |
| 5062 | GO_UBIQUITIN_PROTEIN_TRANSFERASE_INHIBITOR_ACTIVITY                  | -0.77 | 0.12 | 0 | 0 | 0 | not significant |
| 5063 | REACTOME_ACTIVATION_OF_KAINATE_RECEPTORS_UPON_Glutamate_BINDING      | -0.77 | 0.12 | 0 | 0 | 0 | not significant |
| 5064 | REACTOME_GLUCURONIDATION                                             | -0.77 | 0.12 | 0 | 0 | 0 | not significant |
| 5065 | REACTOME_P130CAS_LINKAGE_TO_MAPK_SIGNALING_FOR_INTEGRINS             | -0.77 | 0.12 | 0 | 0 | 0 | not significant |
| 5066 | REACTOME_REGULATION_OF_GENE_EXPRESSION_BY_HYPOXIA_INDUCIBLE_FACTC    | -0.77 | 0.12 | 0 | 0 | 0 | not significant |
| 5067 | BIOCARTA_RELA_PATHWAY                                                | -0.77 | 0.11 | 0 | 0 | 0 | not significant |
| 5068 | BIOCARTA_TERT_PATHWAY                                                | -0.77 | 0.11 | 0 | 0 | 0 | not significant |
| 5069 | GO_CATECHOLAMINE_METABOLIC_PROCESS                                   | -0.77 | 0.11 | 0 | 0 | 0 | not significant |
| 5070 | GO_CYTOPLASMIC_UBIQUITIN_LIGASE_COMPLEX                              | -0.77 | 0.11 | 0 | 0 | 0 | not significant |
| 5071 | GO_DNA_LIGATION                                                      | -0.77 | 0.11 | 0 | 0 | 0 | not significant |
| 5072 | GO_ERROR_FREE_TRANSLESION_SYNTHESIS                                  | -0.77 | 0.11 | 0 | 0 | 0 | not significant |
| 5073 | GO_ISWI_TYPE_COMPLEX                                                 | -0.77 | 0.11 | 0 | 0 | 0 | not significant |
| 5074 | GO_NEGATIVE_REGULATION_OF_B_CELL_RECEPTOR_SIGNALING_PATHWAY          | -0.77 | 0.11 | 0 | 0 | 0 | not significant |
| 5075 | GO_PERIPHERAL_NERVOUS_SYSTEM_NEURON_DIFFERENTIATION                  | -0.77 | 0.11 | 0 | 0 | 0 | not significant |
| 5076 | GO_POSITIVE_REGULATION_OF_VASCULAR_ASSOCIATED_SMOOTH_MUSCLE_CELI     | -0.77 | 0.11 | 0 | 0 | 0 | not significant |
| 5077 | GO_REGULATION_OF_GONAD_DEVELOPMENT                                   | -0.77 | 0.11 | 0 | 0 | 0 | not significant |
| 5078 | GO_STRUCTURAL_MOLECULE_ACTIVITY_CONFERRING_ELASTICITY                | -0.77 | 0.11 | 0 | 0 | 0 | not significant |
| 5079 | MIKKELSEN_PLURIPOTENT_STATE_DN                                       | -0.77 | 0.11 | 0 | 0 | 0 | not significant |
| 5080 | PID_ANTHRAX_PATHWAY                                                  | -0.77 | 0.11 | 0 | 0 | 0 | not significant |
| 5081 | GO_NEGATIVE_REGULATION_OF_MUSCLE_CELL_APOPTOTIC_PROCESS              | -0.77 | 0.1  | 0 | 0 | 0 | not significant |
| 5082 | GO_NEGATIVE_REGULATION_OF_REACTIVE_OXYGEN_SPECIES_METABOLIC_PROG     | -0.77 | 0.1  | 0 | 0 | 0 | not significant |
| 5083 | GO_SOLUTE_CATION_ANTIPORTER_ACTIVITY                                 | -0.77 | 0.1  | 0 | 0 | 0 | not significant |
| 5084 | REACTOME_TRANSLESION_SYNTHESIS_BY_POLH                               | -0.77 | 0.1  | 0 | 0 | 0 | not significant |
| 5085 | CHEOK_RESPONSE_TO_MERCAPTOPURINE_AND_HD_MTX_DN                       | -0.77 | 0.09 | 0 | 0 | 0 | not significant |
| 5086 | CHR9Q32                                                              | -0.77 | 0.09 | 0 | 0 | 0 | not significant |
| 5087 | GO_MRNA_SPLICE_SITE_SELECTION                                        | -0.77 | 0.09 | 0 | 0 | 0 | not significant |
| 5088 | GO_POSITIVE_REGULATION_OF_CILIUM_ASSEMBLY                            | -0.77 | 0.09 | 0 | 0 | 0 | not significant |
| 5089 | REACTOME_NEPHRIN_FAMILY_INTERACTIONS                                 | -0.77 | 0.09 | 0 | 0 | 0 | not significant |
| 5090 | BIOCARTA_STRESS_PATHWAY                                              | -0.77 | 0.08 | 0 | 0 | 0 | not significant |
| 5091 | GO_REGULATION_OF_CILIUM_ASSEMBLY                                     | -0.77 | 0.07 | 0 | 0 | 0 | not significant |
| 5092 | GO_INORGANIC_ION_IMPORT_ACROSS_PLASMA_MEMBRANE                       | -0.77 | 0.06 | 0 | 0 | 0 | not significant |
| 5093 | GO_REGULATION_OF_RESPONSE_TO_DRUG                                    | -0.77 | 0.06 | 0 | 0 | 0 | not significant |
| 5094 | GO_MORPHOGENESIS_OF_EMBRYONIC_EPITHELIUM                             | -0.77 | 0.04 | 0 | 0 | 0 | not significant |
| 5095 | JAZAG_TGFB1_SIGNALING_VIA_SMAD4_UP                                   | -0.77 | 0.04 | 0 | 0 | 0 | not significant |
| 5096 | GO_CENTRAL_NERVOUS_SYSTEM_NEURON_DIFFERENTIATION                     | -0.77 | 0.03 | 0 | 0 | 0 | not significant |
| 5097 | SIRNA_EIF4G1_DN                                                      | -0.77 | 0.03 | 0 | 0 | 0 | not significant |
| 5098 | GO_REGULATION_OF_HYALURONAN_BIOSYNTHETIC_PROCESS                     | -0.76 | 0.13 | 0 | 0 | 0 | not significant |
| 5099 | INAMURA_LUNG_CANCER_SCC_SUBTYPES_UP                                  | -0.76 | 0.13 | 0 | 0 | 0 | not significant |
| 5100 | GO_CONDENSIN_COMPLEX                                                 | -0.76 | 0.12 | 0 | 0 | 0 | not significant |
| 5101 | GO_MRNA_3_END_PROCESSING_BY_STEM_LOOP_BINDING_AND_CLEAVAGE           | -0.76 | 0.12 | 0 | 0 | 0 | not significant |
| 5102 | GO_NEGATIVE_REGULATION_OF_ATPASE_ACTIVITY                            | -0.76 | 0.12 | 0 | 0 | 0 | not significant |
| 5103 | GO_NEGATIVE_REGULATION_OF_VIRAL_ENTRY_INTO_HOST_CELL                 | -0.76 | 0.12 | 0 | 0 | 0 | not significant |
| 5104 | GO_PHOSPHOFRUCTOKINASE_ACTIVITY                                      | -0.76 | 0.12 | 0 | 0 | 0 | not significant |
| 5105 | REACTOME_ACTIVATION_OF_RAC1                                          | -0.76 | 0.12 | 0 | 0 | 0 | not significant |
| 5106 | REACTOME_NEF_MEDIATED_CD8_DOWN_REGULATION                            | -0.76 | 0.12 | 0 | 0 | 0 | not significant |
| 5107 | ZEMBUTSU_SENSITIVITY_TO_CISPLATIN                                    | -0.76 | 0.12 | 0 | 0 | 0 | not significant |
| 5108 | BIOCARTA_PCAF_PATHWAY                                                | -0.76 | 0.11 | 0 | 0 | 0 | not significant |
| 5109 | GO_HEPATOCTYTE_APOPTOTIC_PROCESS                                     | -0.76 | 0.11 | 0 | 0 | 0 | not significant |
| 5110 | GO_NUCLEAR_RETENTION_OF_PRE_MRNA_AT_THE_SITE_OF_TRANSCRIPTION        | -0.76 | 0.11 | 0 | 0 | 0 | not significant |
| 5111 | GO_REFLEX                                                            | -0.76 | 0.11 | 0 | 0 | 0 | not significant |

|      |                                                                    |       |      |   |   |   |                 |
|------|--------------------------------------------------------------------|-------|------|---|---|---|-----------------|
| 5112 | GO_SMALL_RIBOSOMAL_SUBUNIT_RRNA_BINDING                            | -0.76 | 0.11 | 0 | 0 | 0 | not significant |
| 5113 | BIOCARTA_PKC_PATHWAY                                               | -0.76 | 0.1  | 0 | 0 | 0 | not significant |
| 5114 | GO_CYTOCHROME_B5_REDUCTASE_ACTIVITY_ACTING_ON_NAD_P_H              | -0.76 | 0.1  | 0 | 0 | 0 | not significant |
| 5115 | GO_EPIBOLY                                                         | -0.76 | 0.1  | 0 | 0 | 0 | not significant |
| 5116 | GO_POSITIVE_REGULATION_OF_LIPID_CATABOLIC_PROCESS                  | -0.76 | 0.1  | 0 | 0 | 0 | not significant |
| 5117 | GO_POSTSYNAPTIC_SPECIALIZATION_ASSEMBLY                            | -0.76 | 0.1  | 0 | 0 | 0 | not significant |
| 5118 | GO_REGULATION_OF_NUCLEAR_TRANSCRIBED_MRNA_CATABOLIC_PROCESS_DE/    | -0.76 | 0.1  | 0 | 0 | 0 | not significant |
| 5119 | GO_RRNA_BASE_METHYLATION                                           | -0.76 | 0.1  | 0 | 0 | 0 | not significant |
| 5120 | REACTOME_SYNTHESIS_OF_DIPHTHAMIDE_EEF2                             | -0.76 | 0.1  | 0 | 0 | 0 | not significant |
| 5121 | WIKMAN_ASBESTOS_LUNG_CANCER_UP                                     | -0.76 | 0.1  | 0 | 0 | 0 | not significant |
| 5122 | GO_PLATELET_DENSE_GRANULE                                          | -0.76 | 0.09 | 0 | 0 | 0 | not significant |
| 5123 | REACTOME_GABA_RECEPTOR_ACTIVATION                                  | -0.76 | 0.09 | 0 | 0 | 0 | not significant |
| 5124 | GO_PHOTOTRANSDUCTION                                               | -0.76 | 0.07 | 0 | 0 | 0 | not significant |
| 5125 | GO_REGULATION_OF_RECEPTOR_INTERNALIZATION                          | -0.76 | 0.07 | 0 | 0 | 0 | not significant |
| 5126 | EPPERT_LSC_R                                                       | -0.76 | 0.06 | 0 | 0 | 0 | not significant |
| 5127 | GO_MICROBODY_LUMEN                                                 | -0.76 | 0.06 | 0 | 0 | 0 | not significant |
| 5128 | GO_RESPONSE_TO_DSRNA                                               | -0.76 | 0.06 | 0 | 0 | 0 | not significant |
| 5129 | GO_VESICLE_DOCKING_INVOLVED_IN_EXOCYTOSIS                          | -0.76 | 0.06 | 0 | 0 | 0 | not significant |
| 5130 | GO_POSITIVE_REGULATION_OF_ACTIN_FILAMENT_BUNDLE_ASSEMBLY           | -0.76 | 0.05 | 0 | 0 | 0 | not significant |
| 5131 | GO_POSITIVE_REGULATION_OF_STRESS_FIBER_ASSEMBLY                    | -0.76 | 0.05 | 0 | 0 | 0 | not significant |
| 5132 | GO_REGULATION_OF_CARDIAC_MUSCLE_TISSUE_DEVELOPMENT                 | -0.76 | 0.05 | 0 | 0 | 0 | not significant |
| 5133 | GO_MITOCHONDRIAL_ELECTRON_TRANSPORT_NADH_TO_UBIQUINONE             | -0.76 | 0.04 | 0 | 0 | 0 | not significant |
| 5134 | GO_POSITIVE_REGULATION_OF_ENDOCYTOSIS                              | -0.76 | 0.04 | 0 | 0 | 0 | not significant |
| 5135 | REACTOME_E3_UBIQUITIN_LIGASES_UBIQUITINATE_TARGET_PROTEINS         | -0.76 | 0.04 | 0 | 0 | 0 | not significant |
| 5136 | REACTOME_P75_NTR_RECEPTOR_MEDIATED_SIGNALLING                      | -0.76 | 0.03 | 0 | 0 | 0 | not significant |
| 5137 | GO_RESPIRASOME                                                     | -0.76 | 0.02 | 0 | 0 | 0 | not significant |
| 5138 | GO_SMALL_RIBOSOMAL_SUBUNIT                                         | -0.76 | 0.02 | 0 | 0 | 0 | not significant |
| 5139 | REACTOME_RESPIRATORY_ELECTRON_TRANSPORT_ATP_SYNTHESIS_BY_CHEMIC    | -0.76 | 0.02 | 0 | 0 | 0 | not significant |
| 5140 | GO_GAMMA_AMINOBTUYRIC_ACID_TRANSPORT                               | -0.75 | 0.12 | 0 | 0 | 0 | not significant |
| 5141 | GO_TUBULIN_COMPLEX_ASSEMBLY                                        | -0.75 | 0.12 | 0 | 0 | 0 | not significant |
| 5142 | GO_REGULATION_OF ASPARTIC TYPE ENDOPEPTIDASE ACTIVITY INVOLVED_IN_ | -0.75 | 0.11 | 0 | 0 | 0 | not significant |
| 5143 | GO_REGULATION_OF_ER_ASSOCIATED_UBIQUITIN_DEPENDENT_PROTEIN_CATABC  | -0.75 | 0.11 | 0 | 0 | 0 | not significant |
| 5144 | GO_REGULATION_OF_PROTEIN_FOLDING                                   | -0.75 | 0.11 | 0 | 0 | 0 | not significant |
| 5145 | GO_REGULATION_OF_RESPIRATORY_GASEOUS_EXCHANGE                      | -0.75 | 0.11 | 0 | 0 | 0 | not significant |
| 5146 | GO_SOMATIC_DIVERSIFICATION_OF_T_CELL_RECEPTOR_GENES                | -0.75 | 0.11 | 0 | 0 | 0 | not significant |
| 5147 | MIKKELSEN_IPS_ICP_WITH_H3K27ME3                                    | -0.75 | 0.11 | 0 | 0 | 0 | not significant |
| 5148 | WILLIAMS_ESR2_TARGETS_DN                                           | -0.75 | 0.11 | 0 | 0 | 0 | not significant |
| 5149 | BIOCARTA_PS1_PATHWAY                                               | -0.75 | 0.1  | 0 | 0 | 0 | not significant |
| 5150 | CHR4Q23                                                            | -0.75 | 0.1  | 0 | 0 | 0 | not significant |
| 5151 | CHRXQ23                                                            | -0.75 | 0.1  | 0 | 0 | 0 | not significant |
| 5152 | GO_AEROBIC_ELECTRON_TRANSPORT_CHAIN                                | -0.75 | 0.1  | 0 | 0 | 0 | not significant |
| 5153 | GO_ESTABLISHMENT_OR_MAINTENANCE_OF_ACTIN_CYTOSKELETON_POLARITY     | -0.75 | 0.1  | 0 | 0 | 0 | not significant |
| 5154 | GO_FOREBRAIN_NEURON_DIFFERENTIATION                                | -0.75 | 0.1  | 0 | 0 | 0 | not significant |
| 5155 | GO_MITOTIC_NUCLEAR_ENVELOPE_REASSEMBLY                             | -0.75 | 0.1  | 0 | 0 | 0 | not significant |
| 5156 | REACTOME_MYOCLONIC_EPILEPSY_OF_LAFORA                              | -0.75 | 0.1  | 0 | 0 | 0 | not significant |
| 5157 | REACTOME_REGULATION_OF_KIT_SIGNALING                               | -0.75 | 0.1  | 0 | 0 | 0 | not significant |
| 5158 | REACTOME_STING_MEDIATED_INDUCION_OF_HOST_IMMUNE_RESPONSES          | -0.75 | 0.1  | 0 | 0 | 0 | not significant |
| 5159 | REACTOME_TRANSPORT_OF_NUCLEOTIDE_SUGARS                            | -0.75 | 0.1  | 0 | 0 | 0 | not significant |
| 5160 | WEINMANN_ADAPTATION_TO_HYPOXIA_UP                                  | -0.75 | 0.1  | 0 | 0 | 0 | not significant |
| 5161 | GO_CELL_PROLIFERATION_INVOLVED_IN_HEART_MORPHOGENESIS              | -0.75 | 0.09 | 0 | 0 | 0 | not significant |
| 5162 | GO_ENDOPLASMIC_RETICULUM_TUBULAR_NETWORK_ORGANIZATION              | -0.75 | 0.09 | 0 | 0 | 0 | not significant |
| 5163 | GO_GASTRULATION_WITH_MOUTH_FORMING_SECOND                          | -0.75 | 0.09 | 0 | 0 | 0 | not significant |
| 5164 | GO_OXIDOREDUCTASE_ACTIVITY_ACTING_ON_A_HEME_GROUP_OF_DONORS        | -0.75 | 0.09 | 0 | 0 | 0 | not significant |
| 5165 | GO_SECRETORY_GRANULE_ORGANIZATION                                  | -0.75 | 0.09 | 0 | 0 | 0 | not significant |
| 5166 | PARK_HSC_VS_MULTIPOTENT_PROGENITORS_UP                             | -0.75 | 0.09 | 0 | 0 | 0 | not significant |
| 5167 | GO_POSITIVE_REGULATION_OF_PROTEIN_AUTOPHOSPHORYLATION              | -0.75 | 0.08 | 0 | 0 | 0 | not significant |
| 5168 | KIM_ALL_DISORDERS_OLIGODENDROCYTE_NUMBER_CORR_DN                   | -0.75 | 0.08 | 0 | 0 | 0 | not significant |
| 5169 | GO_RAC_PROTEIN_SIGNAL_TRANSDUCTION                                 | -0.75 | 0.07 | 0 | 0 | 0 | not significant |
| 5170 | GO_DETERMINATION_OF_HEART_LEFT_RIGHT_ASYMMETRY                     | -0.75 | 0.06 | 0 | 0 | 0 | not significant |
| 5171 | GO_METALLOENDOPEPTIDASE_ACTIVITY                                   | -0.75 | 0.06 | 0 | 0 | 0 | not significant |
| 5172 | GO_REGULATION_OF_DEFENSE_RESPONSE_TO_VIRUS_BY_VIRUS                | -0.75 | 0.06 | 0 | 0 | 0 | not significant |
| 5173 | GO_RNA_POLYMERASE_II_TRANSCRIPTION_FACTOR_BINDING                  | -0.75 | 0.06 | 0 | 0 | 0 | not significant |
| 5174 | REACTOME_MTOR_SIGNALLING                                           | -0.75 | 0.06 | 0 | 0 | 0 | not significant |
| 5175 | FAELT_B_CLL_WITH_VH_REARRANGEMENTS_DN                              | -0.75 | 0.05 | 0 | 0 | 0 | not significant |
| 5176 | GO_APICAL_JUNCTION_ASSEMBLY                                        | -0.75 | 0.05 | 0 | 0 | 0 | not significant |
| 5177 | GO_EMBRYONIC_HEART_TUBE_DEVELOPMENT                                | -0.75 | 0.05 | 0 | 0 | 0 | not significant |
| 5178 | REACTOME_ENDOSOMAL_SORTING_COMPLEX_REQUIRED_FOR_TRANSPORT_ESC      | -0.75 | 0.05 | 0 | 0 | 0 | not significant |
| 5179 | GO_ACTOMYOSIN                                                      | -0.75 | 0.03 | 0 | 0 | 0 | not significant |
| 5180 | REACTOME_RAB_GEF5_EXCHANGE_GTP_FOR_GDP_ON_RABS                     | -0.75 | 0.03 | 0 | 0 | 0 | not significant |
| 5181 | KEGG_PARKINSONS_DISEASE                                            | -0.75 | 0.02 | 0 | 0 | 0 | not significant |
| 5182 | GO_GAMMA_AMINOBTUYRIC_ACID_SECRETION                               | -0.74 | 0.12 | 0 | 0 | 0 | not significant |
| 5183 | GO_NEGATIVE_REGULATION_OF_RECEPTOR_BINDING                         | -0.74 | 0.12 | 0 | 0 | 0 | not significant |
| 5184 | BAFNA_MUC4_TARGETS_UP                                              | -0.74 | 0.11 | 0 | 0 | 0 | not significant |
| 5185 | BIOCARTA_HSWI_SNF_PATHWAY                                          | -0.74 | 0.1  | 0 | 0 | 0 | not significant |
| 5186 | FIGUEROA_AML_METHYLATION_CLUSTER_5_UP                              | -0.74 | 0.1  | 0 | 0 | 0 | not significant |
| 5187 | GO_EOSINOPHIL_ACTIVATION                                           | -0.74 | 0.1  | 0 | 0 | 0 | not significant |
| 5188 | GO_KERATINIZATION                                                  | -0.74 | 0.1  | 0 | 0 | 0 | not significant |
| 5189 | GO_MAINTENANCE_OF_SYNAPSE_STRUCTURE                                | -0.74 | 0.1  | 0 | 0 | 0 | not significant |
| 5190 | GO_MEDIUM_CHAIN_FATTY_ACID_COA_LIGASE_ACTIVITY                     | -0.74 | 0.1  | 0 | 0 | 0 | not significant |
| 5191 | GO_POSITIVE_REGULATION_OF_DEOXYRIBONUCLEASE_ACTIVITY               | -0.74 | 0.1  | 0 | 0 | 0 | not significant |
| 5192 | GO_PROTEIN_LOCALIZATION_TO_BASOLATERAL_PLASMA_MEMBRANE             | -0.74 | 0.1  | 0 | 0 | 0 | not significant |
| 5193 | GO_TRANSMEMBRANE_RECEPTOR_PROTEIN_SERINE_THREONINE_KINASE_ACTIVIT  | -0.74 | 0.1  | 0 | 0 | 0 | not significant |
| 5194 | HOLLERN_ADENOMYOEPITHELIAL_BREAST_TUMOR                            | -0.74 | 0.1  | 0 | 0 | 0 | not significant |
| 5195 | MIKHAYLOVA_OXIDATIVE_STRESS_RESPONSE_VIA_VHL_DN                    | -0.74 | 0.1  | 0 | 0 | 0 | not significant |
| 5196 | REACTOME_ARYL_HYDROCARBON_RECEPTOR_SIGNALLING                      | -0.74 | 0.1  | 0 | 0 | 0 | not significant |
| 5197 | CHR14Q13                                                           | -0.74 | 0.09 | 0 | 0 | 0 | not significant |
| 5198 | GO_REGULATION_OF_AMINO_ACID_TRANSPORT                              | -0.74 | 0.09 | 0 | 0 | 0 | not significant |
| 5199 | GO_TITIN_BINDING                                                   | -0.74 | 0.09 | 0 | 0 | 0 | not significant |
| 5200 | MYLLYKANGAS_AMPLIFICATION_HOT_SPOT_15                              | -0.74 | 0.09 | 0 | 0 | 0 | not significant |
| 5201 | GO_COPI_VESICLE_COAT                                               | -0.74 | 0.08 | 0 | 0 | 0 | not significant |
| 5202 | GO_PHOTOTRANSDUCTION_VISIBLE_LIGHT                                 | -0.74 | 0.08 | 0 | 0 | 0 | not significant |
| 5203 | GO_POSITIVE_REGULATION_OF_CALCIIUM_ION_TRANSPORT_INTO_CYTOSOL      | -0.74 | 0.08 | 0 | 0 | 0 | not significant |
| 5204 | GO POSITIVE REGULATION OF RELEASE OF SEQUESTERED CALCIUM ION INTO  | -0.74 | 0.08 | 0 | 0 | 0 | not significant |
| 5205 | NKOLSKY_BREAST_CANCER_5P15_AMPLICON                                | -0.74 | 0.08 | 0 | 0 | 0 | not significant |
| 5206 | REACTOME_RAIF_INDEPENDENT_MAPK1_3_ACTIVATION                       | -0.74 | 0.08 | 0 | 0 | 0 | not significant |
| 5207 | REACTOME_SIGNALING_BY_NTRK3_TRKC                                   | -0.74 | 0.08 | 0 | 0 | 0 | not significant |
| 5208 | ZHAN_MULTIPLE_MYELOMA_MF_UP                                        | -0.74 | 0.08 | 0 | 0 | 0 | not significant |
| 5209 | CHRS5P13                                                           | -0.74 | 0.07 | 0 | 0 | 0 | not significant |
| 5210 | GO_INOSITOL_PHOSPHATE_CATABOLIC_PROCESS                            | -0.74 | 0.07 | 0 | 0 | 0 | not significant |
| 5211 | GO_KERATINOCYTE_PROLIFERATION                                      | -0.74 | 0.07 | 0 | 0 | 0 | not significant |
| 5212 | GO_PODOSOME                                                        | -0.74 | 0.07 | 0 | 0 | 0 | not significant |
| 5213 | GO_ARP2_3_COMPLEX_MEDIATED_ACTIN_NUCLEATION                        | -0.74 | 0.06 | 0 | 0 | 0 | not significant |
| 5214 | GO_CARBOHYDRATE_PHOSPHORYLATION                                    | -0.74 | 0.06 | 0 | 0 | 0 | not significant |
| 5215 | NAKAMURA_METASTASIS_MODEL_UP                                       | -0.74 | 0.06 | 0 | 0 | 0 | not significant |
| 5216 | BURTON_ADIPOGENESIS_7                                              | -0.74 | 0.05 | 0 | 0 | 0 | not significant |
| 5217 | GO_CELL_CELL_CONTACT_ZONE                                          | -0.74 | 0.04 | 0 | 0 | 0 | not significant |
| 5218 | JOHNSTONE_PARVB_TARGETS_1_DN                                       | -0.74 | 0.04 | 0 | 0 | 0 | not significant |
| 5219 | GO_SITE_OF_DOUBLE_STRAND_BREAK                                     | -0.74 | 0.03 | 0 | 0 | 0 | not significant |
| 5220 | GO_ARYL_HYDROCARBON_RECEPTOR_BINDING                               | -0.73 | 0.11 | 0 | 0 | 0 | not significant |

|      |                                                                    |       |      |   |   |   |                 |
|------|--------------------------------------------------------------------|-------|------|---|---|---|-----------------|
| 5221 | GO_ENDOCARDIUM_DEVELOPMENT                                         | -0.73 | 0.11 | 0 | 0 | 0 | not significant |
| 5222 | GO_RESPONSE_TO_MACROPHAGE_COLONY_STIMULATING_FACTOR                | -0.73 | 0.11 | 0 | 0 | 0 | not significant |
| 5223 | GARGALOVIC_RESPONSE_TO_OXIDIZED_PHOSPHOLIPIDS_BLACK_DN             | -0.73 | 0.1  | 0 | 0 | 0 | not significant |
| 5224 | GO_SODIUM_ION_IMPORT_ACROSS_PLASMA_MEMBRANE                        | -0.73 | 0.1  | 0 | 0 | 0 | not significant |
| 5225 | MYLLYKANGAS_AMPLIFICATION_HOT_SPOT_25                              | -0.73 | 0.1  | 0 | 0 | 0 | not significant |
| 5226 | REACTOME_IRF3_MEDIATED_INDUCTION_OF_TYPE_I_IFN                     | -0.73 | 0.1  | 0 | 0 | 0 | not significant |
| 5227 | RIZ_ERYTHROID_DIFFERENTIATION_6HR                                  | -0.73 | 0.1  | 0 | 0 | 0 | not significant |
| 5228 | GO_ANATOMICAL_STRUCTURE_REGRESSION                                 | -0.73 | 0.09 | 0 | 0 | 0 | not significant |
| 5229 | GO_COMPLEMENT_BINDING                                              | -0.73 | 0.09 | 0 | 0 | 0 | not significant |
| 5230 | GO_CYTOPLASMIC_SEQUESTERING_OF_NF_KAPPAB                           | -0.73 | 0.09 | 0 | 0 | 0 | not significant |
| 5231 | GO_DOPAMINERGIC_NEURON_DIFFERENTIATION                             | -0.73 | 0.09 | 0 | 0 | 0 | not significant |
| 5232 | GO_EPITHELIAL_TO_MESENCHYMAL_TRANSITION_INVOLVED_IN_ENDOCARDIAL_CU | -0.73 | 0.09 | 0 | 0 | 0 | not significant |
| 5233 | GO_NEGATIVE_REGULATION_OF_GLUCOSE_IMPORT                           | -0.73 | 0.09 | 0 | 0 | 0 | not significant |
| 5234 | GO_POSITIVE_REGULATION_OF_GRANULOCYTE_MACROPHAGE_COLONY_STIMULAF   | -0.73 | 0.09 | 0 | 0 | 0 | not significant |
| 5235 | GO_REGULATION_OF_RAC_PROTEIN_SIGNAL_TRANSDUCTION                   | -0.73 | 0.09 | 0 | 0 | 0 | not significant |
| 5236 | GO_UV_DAMAGE_EXCISION_REPAIR                                       | -0.73 | 0.09 | 0 | 0 | 0 | not significant |
| 5237 | NEBEN_AML_WITH_FLT3_OR_NRAS_DN                                     | -0.73 | 0.09 | 0 | 0 | 0 | not significant |
| 5238 | GO_AMINO_SUGAR_METABOLIC_PROCESS                                   | -0.73 | 0.08 | 0 | 0 | 0 | not significant |
| 5239 | GO_DEATH_RECEPTOR_BINDING                                          | -0.73 | 0.08 | 0 | 0 | 0 | not significant |
| 5240 | GO_VOLTAGE_GATED_CALCMIUM_CHANNEL_COMPLEX                          | -0.73 | 0.08 | 0 | 0 | 0 | not significant |
| 5241 | CHR21Q21                                                           | -0.73 | 0.07 | 0 | 0 | 0 | not significant |
| 5242 | GO_H4_HISTONE_ACETYLTTRANSFERASE_ACTIVITY                          | -0.73 | 0.07 | 0 | 0 | 0 | not significant |
| 5243 | GO_WW_DOMAIN_BINDING                                               | -0.73 | 0.07 | 0 | 0 | 0 | not significant |
| 5244 | REACTOME_GLYOXYLATE_METABOLISM_AND_GLYCINE_DEGRADATION             | -0.73 | 0.07 | 0 | 0 | 0 | not significant |
| 5245 | REACTOME_METAL_ION_SLC_TRANSPORTERS                                | -0.73 | 0.07 | 0 | 0 | 0 | not significant |
| 5246 | GO_EXOSOME_RNASE_COMPLEX                                           | -0.73 | 0.06 | 0 | 0 | 0 | not significant |
| 5247 | GO_PROTEIN_TRANSPORT_WITHIN_LIPID_BILAYER                          | -0.73 | 0.06 | 0 | 0 | 0 | not significant |
| 5248 | GO_REGULATION_OF_ACTIN_CYTOSKELETON_REORGANIZATION                 | -0.73 | 0.06 | 0 | 0 | 0 | not significant |
| 5249 | GO_REGULATION_OF_COAGULATION                                       | -0.73 | 0.05 | 0 | 0 | 0 | not significant |
| 5250 | GO_REGULATION_OF_TRANSCRIPTION_REGULATORY_REGION_DNA_BINDING       | -0.73 | 0.05 | 0 | 0 | 0 | not significant |
| 5251 | GO_RUFFLE_ASSEMBLY                                                 | -0.73 | 0.05 | 0 | 0 | 0 | not significant |
| 5252 | CHR14Q23                                                           | -0.73 | 0.04 | 0 | 0 | 0 | not significant |
| 5253 | NIKOLSKY_BREAST_CANCER_8P12_P11_AMPLICON                           | -0.73 | 0.04 | 0 | 0 | 0 | not significant |
| 5254 | REACTOME_FORMATION_OF_INCISION_COMPLEX_IN_GG_NER                   | -0.73 | 0.04 | 0 | 0 | 0 | not significant |
| 5255 | GARGALOVIC_RESPONSE_TO_OXIDIZED_PHOSPHOLIPIDS_BLUE_DN              | -0.73 | 0.03 | 0 | 0 | 0 | not significant |
| 5256 | GO_NEUROMUSCULAR_PROCESS                                           | -0.73 | 0.03 | 0 | 0 | 0 | not significant |
| 5257 | REACTOME_CELL_DEATH_SIGNALLING_VIA_NRAGE_NRF1_AND_NADE             | -0.73 | 0.03 | 0 | 0 | 0 | not significant |
| 5258 | REACTOME_PEROXISOMAL_PROTEIN_IMPORT                                | -0.73 | 0.02 | 0 | 0 | 0 | not significant |
| 5259 | GO_APICAL_JUNCTION_COMPLEX                                         | -0.73 | 0.01 | 0 | 0 | 0 | not significant |
| 5260 | GO_RUFFLE                                                          | -0.73 | 0.01 | 0 | 0 | 0 | not significant |
| 5261 | GO_SYNAPTIC_VESICLE_LOCALIZATION                                   | -0.73 | 0.01 | 0 | 0 | 0 | not significant |
| 5262 | GO_MODULATION_OF_AGE_RELATED_BEHAVIORAL_DECLINE                    | -0.72 | 0.1  | 0 | 0 | 0 | not significant |
| 5263 | GO_NEGATIVE_REGULATION_OF_AMINE_TRANSPORT                          | -0.72 | 0.1  | 0 | 0 | 0 | not significant |
| 5264 | GO_POSITIVE_REGULATION_OF_CELL_SIZE                                | -0.72 | 0.1  | 0 | 0 | 0 | not significant |
| 5265 | GO_REGULATION_OF_CLATHRIN_DEPENDENT_ENDOCYTOSIS                    | -0.72 | 0.1  | 0 | 0 | 0 | not significant |
| 5266 | ITO_PTTG1_TARGETS_UP                                               | -0.72 | 0.1  | 0 | 0 | 0 | not significant |
| 5267 | REACTOME_LIPOPHAGY                                                 | -0.72 | 0.1  | 0 | 0 | 0 | not significant |
| 5268 | GO_ACTIVATION_OF_JNK_ACTIVITY                                      | -0.72 | 0.09 | 0 | 0 | 0 | not significant |
| 5269 | GO_CELLULAR_ANION_HOMEOSTASIS                                      | -0.72 | 0.09 | 0 | 0 | 0 | not significant |
| 5270 | GO_CENTRIOLE_CENTRIOLE_COHESION                                    | -0.72 | 0.09 | 0 | 0 | 0 | not significant |
| 5271 | GO_EMBRYONIC_FORELIMB_MORPHOGENESIS                                | -0.72 | 0.09 | 0 | 0 | 0 | not significant |
| 5272 | GO_ESTABLISHMENT_OF_VIRAL_LATENCY                                  | -0.72 | 0.09 | 0 | 0 | 0 | not significant |
| 5273 | GO_MITOCHONDRIAL_RESPIRATORY_CHAIN_COMPLEX_IV                      | -0.72 | 0.09 | 0 | 0 | 0 | not significant |
| 5274 | GO_PROTEIN_INSERTION_INTO_MITOCHONDRIAL_INNER_MEMBRANE             | -0.72 | 0.09 | 0 | 0 | 0 | not significant |
| 5275 | GO_TYPE_B_PANCREATIC_CELL_APOPTOTIC_PROCESS                        | -0.72 | 0.09 | 0 | 0 | 0 | not significant |
| 5276 | KUMAMOTO_RESPONSE_TO_NUTLIN_3A_UP                                  | -0.72 | 0.09 | 0 | 0 | 0 | not significant |
| 5277 | MOOHA_PYR                                                          | -0.72 | 0.09 | 0 | 0 | 0 | not significant |
| 5278 | RIZ_ERYTHROID_DIFFERENTIATION_APOBEC2                              | -0.72 | 0.09 | 0 | 0 | 0 | not significant |
| 5279 | SHANK_TAL1_TARGETS_DN                                              | -0.72 | 0.09 | 0 | 0 | 0 | not significant |
| 5280 | BIOCARTA_41BB_PATHWAY                                              | -0.72 | 0.08 | 0 | 0 | 0 | not significant |
| 5281 | GO_ADAPTATION_OF_SIGNALING_PATHWAY                                 | -0.72 | 0.08 | 0 | 0 | 0 | not significant |
| 5282 | GO_CCR4_NOT_COMPLEX                                                | -0.72 | 0.08 | 0 | 0 | 0 | not significant |
| 5283 | GO_CELLULAR_RESPONSE_TO_LEPTIN_STIMULUS                            | -0.72 | 0.08 | 0 | 0 | 0 | not significant |
| 5284 | GO_CORTICAL_ENDOPLASMIC_RETICULUM                                  | -0.72 | 0.08 | 0 | 0 | 0 | not significant |
| 5285 | GO_MUSCLE_HYPERTROPHY_IN_RESPONSE_TO_STRESS                        | -0.72 | 0.08 | 0 | 0 | 0 | not significant |
| 5286 | GO_NEGATIVE_REGULATION_OF_CHROMATIN_SILENCING                      | -0.72 | 0.08 | 0 | 0 | 0 | not significant |
| 5287 | GO_OXIDOREDUCTASE_ACTIVITY_ACTING_ON_THE_CH_NH_GROUP_OF_DONORS     | -0.72 | 0.08 | 0 | 0 | 0 | not significant |
| 5288 | ROZANOV_MMP14_TARGETS_SUBSET                                       | -0.72 | 0.08 | 0 | 0 | 0 | not significant |
| 5289 | GO_CARBOHYDRATE_KINASE_ACTIVITY                                    | -0.72 | 0.07 | 0 | 0 | 0 | not significant |
| 5290 | MATTIOLI_MGUS_VS_MULTIPLE_MYELOMA                                  | -0.72 | 0.07 | 0 | 0 | 0 | not significant |
| 5291 | REACTOME_SIGNAL_TRANSDUCTION_BY_L1                                 | -0.72 | 0.07 | 0 | 0 | 0 | not significant |
| 5292 | RUAN_RESPONSE_TO_TROGLITAZONE_UP                                   | -0.72 | 0.07 | 0 | 0 | 0 | not significant |
| 5293 | VIETOR_IFRD1_TARGETS                                               | -0.72 | 0.07 | 0 | 0 | 0 | not significant |
| 5294 | GO_MITOCHONDRIAL_FUSION                                            | -0.72 | 0.06 | 0 | 0 | 0 | not significant |
| 5295 | REACTOME_DOWNREGULATION_OF_ERBB2_SIGNALING                         | -0.72 | 0.06 | 0 | 0 | 0 | not significant |
| 5296 | WATANABE_COLON_CANCER_MSI_VS_MSS_UP                                | -0.72 | 0.06 | 0 | 0 | 0 | not significant |
| 5297 | GO_FEAR_RESPONSE                                                   | -0.72 | 0.05 | 0 | 0 | 0 | not significant |
| 5298 | GO_RESPONSE_TO_AMYLOID_BETA                                        | -0.72 | 0.05 | 0 | 0 | 0 | not significant |
| 5299 | HOLLEMAN_ASPARAGINASE_RESISTANCE_ALL_UP                            | -0.72 | 0.05 | 0 | 0 | 0 | not significant |
| 5300 | REACTOME_DAP12_SIGNALING                                           | -0.72 | 0.05 | 0 | 0 | 0 | not significant |
| 5301 | GO_ESTABLISHMENT_OR_MAINTENANCE_OF_BIPOLAR_CELL_POLARITY           | -0.72 | 0.04 | 0 | 0 | 0 | not significant |
| 5302 | BURTON_ADIPOGENESIS_11                                             | -0.72 | 0.03 | 0 | 0 | 0 | not significant |
| 5303 | YAO_TEMPORAL_RESPONSE_TO_PROGESTERONE_CLUSTER_13                   | -0.72 | 0    | 0 | 0 | 0 | not significant |
| 5304 | GO_NON_MEMBRANE_SPANNING_PROTEIN_TYROSINE_PHOSPHATASE_ACTIVITY     | -0.71 | 0.09 | 0 | 0 | 0 | not significant |
| 5305 | GO_POSITIVE_REGULATION_OF_RNA_BINDING                              | -0.71 | 0.09 | 0 | 0 | 0 | not significant |
| 5306 | GO_POSITIVE_REGULATION_OF_TORC1_SIGNALING                          | -0.71 | 0.09 | 0 | 0 | 0 | not significant |
| 5307 | GO_REGULATION_OF_MRNA_EXPORT_FROM_NUCLEUS                          | -0.71 | 0.09 | 0 | 0 | 0 | not significant |
| 5308 | SABATES_COLORECTAL_ADENOMA_SIZE_DN                                 | -0.71 | 0.09 | 0 | 0 | 0 | not significant |
| 5309 | BIOCARTA_EPONFKB_PATHWAY                                           | -0.71 | 0.08 | 0 | 0 | 0 | not significant |
| 5310 | DACOSTA_LOW_DOSE_UV_RESPONSE_VIA_ERCC3_XPCS_DN                     | -0.71 | 0.08 | 0 | 0 | 0 | not significant |
| 5311 | GO_KERATINOCYTE_DEVELOPMENT                                        | -0.71 | 0.08 | 0 | 0 | 0 | not significant |
| 5312 | GO_MICROFILAMENT_MOTOR_ACTIVITY                                    | -0.71 | 0.08 | 0 | 0 | 0 | not significant |
| 5313 | GO_PROTEIN_KINASE_A_CATALYTIC_SUBUNIT_BINDING                      | -0.71 | 0.08 | 0 | 0 | 0 | not significant |
| 5314 | GO_REGULATION_OF_UNSATURATED_FATTY_ACID_BIOSYNTHETIC_PROCESS       | -0.71 | 0.08 | 0 | 0 | 0 | not significant |
| 5315 | GO_CYTOKINE_SECRETION_INVOLVED_IN_IMMUNE_RESPONSE                  | -0.71 | 0.07 | 0 | 0 | 0 | not significant |
| 5316 | GO_HYDROGEN_PEROXIDE_CATABOLIC_PROCESS                             | -0.71 | 0.07 | 0 | 0 | 0 | not significant |
| 5317 | GO_NEGATIVE_REGULATION_OF_ENDOTHELIAL_CELL_PROLIFERATION           | -0.71 | 0.07 | 0 | 0 | 0 | not significant |
| 5318 | GO_NEUROMUSCULAR_SYNAPTIC_TRANSMISSION                             | -0.71 | 0.07 | 0 | 0 | 0 | not significant |
| 5319 | GO_NUCLEOTIDE_TRANSMEMBRANE_TRANSPORTER_ACTIVITY                   | -0.71 | 0.07 | 0 | 0 | 0 | not significant |
| 5320 | GO_RESPONSE_TO_LEPTIN                                              | -0.71 | 0.07 | 0 | 0 | 0 | not significant |
| 5321 | GO_SEQUENCE_SPECIFIC_SINGLE_STRANDED_DNA_BINDING                   | -0.71 | 0.07 | 0 | 0 | 0 | not significant |
| 5322 | OXFORD_RALA_AND_RALB_TARGETS_UP                                    | -0.71 | 0.07 | 0 | 0 | 0 | not significant |
| 5323 | GO_FORMATION_OF_EXTRACHROMOSOMAL_CIRCULAR_DNA                      | -0.71 | 0.06 | 0 | 0 | 0 | not significant |
| 5324 | GO_REGULATION_OF_PRODUCTION_OF_SMALL_RNA_INVOLVED_IN_GENE_SILENCI  | -0.71 | 0.06 | 0 | 0 | 0 | not significant |
| 5325 | REACTOME_G_PROTEIN_BETA_GAMMA_SIGNALING                            | -0.71 | 0.05 | 0 | 0 | 0 | not significant |
| 5326 | CHRXQ26                                                            | -0.71 | 0.04 | 0 | 0 | 0 | not significant |
| 5327 | LIEN_BREAST_CARCINOMA_METAPLASTIC_VS_DUCTAL_UP                     | -0.71 | 0.04 | 0 | 0 | 0 | not significant |
| 5328 | GO_BASE_CONVERSION_OR_SUBSTITUTION_EDITING                         | -0.70 | 0.08 | 0 | 0 | 0 | not significant |
| 5329 | GO_GAMMA_AMMINO BUTYRIC ACID SIGNALING PATHWAY                     | -0.70 | 0.08 | 0 | 0 | 0 | not significant |

|      |                                                                   |       |      |   |   |   |                 |
|------|-------------------------------------------------------------------|-------|------|---|---|---|-----------------|
| 5330 | GO_INTERFERON_ALPHA_BIOSYNTHETIC_PROCESS                          | -0.70 | 0.08 | 0 | 0 | 0 | not significant |
| 5331 | GO_LATE_ENDOSOME_TO_LYSOSOME_TRANSPORT                            | -0.70 | 0.08 | 0 | 0 | 0 | not significant |
| 5332 | GO_METALLOCHAPERONE_ACTIVITY                                      | -0.70 | 0.08 | 0 | 0 | 0 | not significant |
| 5333 | GO_MYBLAST_MIGRATION                                              | -0.70 | 0.08 | 0 | 0 | 0 | not significant |
| 5334 | HOLLEMAN_PREDNISOLONE_RESISTANCE_ALL_DN                           | -0.70 | 0.08 | 0 | 0 | 0 | not significant |
| 5335 | REACTOME_GRB2_SOS_PROVIDES_LINKAGE_TO_MAPK_SIGNALING_FOR_INTEGRIN | -0.70 | 0.08 | 0 | 0 | 0 | not significant |
| 5336 | GO_EMBRYONIC_HEMOPOIESIS                                          | -0.70 | 0.07 | 0 | 0 | 0 | not significant |
| 5337 | GO_HISTONE_H3_K9_TRIMETHYLATION                                   | -0.70 | 0.07 | 0 | 0 | 0 | not significant |
| 5338 | GO_NEGATIVE_REGULATION_OF_CHOLESTEROL_BIOSYNTHETIC_PROCESS        | -0.70 | 0.07 | 0 | 0 | 0 | not significant |
| 5339 | GO_NEGATIVE_REGULATION_OF_GLUCCONEOGENESIS                        | -0.70 | 0.07 | 0 | 0 | 0 | not significant |
| 5340 | GO_REGULATION_OF_DEOXYRIBONUCLEASE_ACTIVITY                       | -0.70 | 0.07 | 0 | 0 | 0 | not significant |
| 5341 | GO_RESPONSE_TO_SALT_STRESS                                        | -0.70 | 0.07 | 0 | 0 | 0 | not significant |
| 5342 | MANN_RESPONSE_TO_AMIFOSTINE_UP                                    | -0.70 | 0.07 | 0 | 0 | 0 | not significant |
| 5343 | SILIGAN_TARGETS_OF_EWS_FLI1_FUSION_UP                             | -0.70 | 0.07 | 0 | 0 | 0 | not significant |
| 5344 | ZEMBUTSU_SENSITIVITY_TO_CYCLOPHOSPHAMIDE                          | -0.70 | 0.07 | 0 | 0 | 0 | not significant |
| 5345 | BIOCARTA_PTDINS_PATHWAY                                           | -0.70 | 0.06 | 0 | 0 | 0 | not significant |
| 5346 | CHR8Q13                                                           | -0.70 | 0.06 | 0 | 0 | 0 | not significant |
| 5347 | GO_POSITIVE_REGULATION_OF_EXTRACELLULAR_MATRIX_ORGANIZATION       | -0.70 | 0.06 | 0 | 0 | 0 | not significant |
| 5348 | GO_POSITIVE_REGULATION_OF_FOCAL_ADHESION_ASSEMBLY                 | -0.70 | 0.06 | 0 | 0 | 0 | not significant |
| 5349 | GO_SET1C_COMPASS_COMPLEX                                          | -0.70 | 0.06 | 0 | 0 | 0 | not significant |
| 5350 | HOLLEMAN_PREDNISOLONE_RESISTANCE_ALL_UP                           | -0.70 | 0.06 | 0 | 0 | 0 | not significant |
| 5351 | MARCHINI TRABECTEDIN_RESISTANCE_UP                                | -0.70 | 0.06 | 0 | 0 | 0 | not significant |
| 5352 | NIKOLSKY_BREAST_CANCER_12Q24_AMPLICON                             | -0.70 | 0.06 | 0 | 0 | 0 | not significant |
| 5353 | REACTOME_P75NTR_SIGNALS_VIA_NF_KB                                 | -0.70 | 0.06 | 0 | 0 | 0 | not significant |
| 5354 | WEINMANN_ADAPTATION_TO_HYPOXIA_DN                                 | -0.70 | 0.06 | 0 | 0 | 0 | not significant |
| 5355 | GO_DORSAL_VENTRAL_NEURAL_TUBE_PATTERNING                          | -0.70 | 0.05 | 0 | 0 | 0 | not significant |
| 5356 | GO_NUCLEOTIDE_TRANSPORT                                           | -0.70 | 0.05 | 0 | 0 | 0 | not significant |
| 5357 | LEE_CALORIE_RESTRICTION_MUSCLE_UP                                 | -0.70 | 0.05 | 0 | 0 | 0 | not significant |
| 5358 | GO_FLEMMING_BODY                                                  | -0.70 | 0.04 | 0 | 0 | 0 | not significant |
| 5359 | GO_NEGATIVE_REGULATION_OF_CALCIUM_ION_TRANSPORT                   | -0.70 | 0.04 | 0 | 0 | 0 | not significant |
| 5360 | CHR8P11                                                           | -0.70 | 0.03 | 0 | 0 | 0 | not significant |
| 5361 | GO_PROTEIN_CONTAINING_COMPLEX_SCAFFOLD_ACTIVITY                   | -0.70 | 0.02 | 0 | 0 | 0 | not significant |
| 5362 | GO_NEGATIVE_REGULATION_OF_FIBROBLAST_APOPTOTIC_PROCESS            | -0.69 | 0.09 | 0 | 0 | 0 | not significant |
| 5363 | GO_UDP_N_ACETYLGALUCOSAMINE_METABOLIC_PROCESS                     | -0.69 | 0.09 | 0 | 0 | 0 | not significant |
| 5364 | GO_MESSENGER_RIBONUCLEOPROTEIN_COMPLEX                            | -0.69 | 0.08 | 0 | 0 | 0 | not significant |
| 5365 | GO_NEGATIVE_REGULATION_OF_CAMP_DEPENDENT_PROTEIN_KINASE_ACTIVITY  | -0.69 | 0.08 | 0 | 0 | 0 | not significant |
| 5366 | GO_NEGATIVE_REGULATION_OF_SODIUM_ION_TRANSMEMBRANE_TRANSPORT      | -0.69 | 0.08 | 0 | 0 | 0 | not significant |
| 5367 | GO_REGULATION_OF_MACROPHAGE_APOPTOTIC_PROCESS                     | -0.69 | 0.08 | 0 | 0 | 0 | not significant |
| 5368 | GO_RS_DOMAIN_BINDING                                              | -0.69 | 0.08 | 0 | 0 | 0 | not significant |
| 5369 | GO_SEQUESTERING_OF_TRIGLYCERIDE                                   | -0.69 | 0.08 | 0 | 0 | 0 | not significant |
| 5370 | MATZUK_MALE_REPRODUCTION_SERTOLI                                  | -0.69 | 0.08 | 0 | 0 | 0 | not significant |
| 5371 | GO_AXON_ENSHEATHMENT_IN_CENTRAL_NERVOUS_SYSTEM                    | -0.69 | 0.07 | 0 | 0 | 0 | not significant |
| 5372 | GO_FORELIMB_MORPHOGENESIS                                         | -0.69 | 0.07 | 0 | 0 | 0 | not significant |
| 5373 | GO_GOLGI_DISASSEMBLY                                              | -0.69 | 0.07 | 0 | 0 | 0 | not significant |
| 5374 | GO_PLATELET_DENSE_TUBULAR_NETWORK                                 | -0.69 | 0.07 | 0 | 0 | 0 | not significant |
| 5375 | GO_POSITIVE_REGULATION_OF_AUTOPHAGOSOME_ASSEMBLY                  | -0.69 | 0.07 | 0 | 0 | 0 | not significant |
| 5376 | REACTOME_TIGHT_JUNCTION_INTERACTIONS                              | -0.69 | 0.07 | 0 | 0 | 0 | not significant |
| 5377 | REACTOME_WNT_LIGAND_BIOGENESIS_AND_TRAFFICKING                    | -0.69 | 0.07 | 0 | 0 | 0 | not significant |
| 5378 | WACKER_HYPOXIA_TARGETS_OF_VHL                                     | -0.69 | 0.07 | 0 | 0 | 0 | not significant |
| 5379 | GO_NUCLEOTIDE_DIPHOSPHATASE_ACTIVITY                              | -0.69 | 0.06 | 0 | 0 | 0 | not significant |
| 5380 | GO_REGULATION_OF_NEURON_PROJECTION_REGENERATION                   | -0.69 | 0.06 | 0 | 0 | 0 | not significant |
| 5381 | GO_SINGLE_STRANDED_DNA_ENDODEOXYRIBONUCLEASE_ACTIVITY             | -0.69 | 0.06 | 0 | 0 | 0 | not significant |
| 5382 | NABA_BASEMENT_MEMBRANES                                           | -0.69 | 0.06 | 0 | 0 | 0 | not significant |
| 5383 | PID_SYNDECAN_1_PATHWAY                                            | -0.69 | 0.06 | 0 | 0 | 0 | not significant |
| 5384 | WU_HBX_TARGETS_2_UP                                               | -0.69 | 0.06 | 0 | 0 | 0 | not significant |
| 5385 | GO_CELLULAR_PROTEIN_CONTAINING_COMPLEX_LOCALIZATION               | -0.69 | 0.05 | 0 | 0 | 0 | not significant |
| 5386 | GO_CYTOPLASMIC_EXOSOME_RNASE_COMPLEX                              | -0.69 | 0.05 | 0 | 0 | 0 | not significant |
| 5387 | REACTOME_REGULATION_OF_INNATE_IMMUNE_RESPONSES_TO_CYTOSOLIC_DNA   | -0.69 | 0.05 | 0 | 0 | 0 | not significant |
| 5388 | FIGUEROA_AML_METHYLATION_CLUSTER_5_DN                             | -0.69 | 0.04 | 0 | 0 | 0 | not significant |
| 5389 | GO_LOW_DENSITY_LIPOPROTEIN_PARTICLE_CLEARANCE                     | -0.69 | 0.04 | 0 | 0 | 0 | not significant |
| 5390 | GO_PROTEIN_TRANSPORT_WITHIN_PLASMA_MEMBRANE                       | -0.69 | 0.04 | 0 | 0 | 0 | not significant |
| 5391 | KEGG_GALACTOSE_METABOLISM                                         | -0.69 | 0.04 | 0 | 0 | 0 | not significant |
| 5392 | GO_REGULATION_OF_AUTOPHAGOSOME_ASSEMBLY                           | -0.69 | 0.03 | 0 | 0 | 0 | not significant |
| 5393 | LEE_LIVER_CANCER_DENA_DN                                          | -0.69 | 0.03 | 0 | 0 | 0 | not significant |
| 5394 | GO_MITOCHONDRIAL_RESPIRATORY_CHAIN_COMPLEX_I                      | -0.69 | 0.02 | 0 | 0 | 0 | not significant |
| 5395 | GO_PLATELET_DEGRANULATION                                         | -0.69 | 0.01 | 0 | 0 | 0 | not significant |
| 5396 | NIKOLSKY_BREAST_CANCER_8Q12_Q22_AMPLICON                          | -0.69 | 0.01 | 0 | 0 | 0 | not significant |
| 5397 | GO_FATTY_ACID_ALPHA_OXIDATION                                     | -0.68 | 0.08 | 0 | 0 | 0 | not significant |
| 5398 | GO_POLAR_MICROTUBULE                                              | -0.68 | 0.08 | 0 | 0 | 0 | not significant |
| 5399 | GO_CEREBRAL_CORTEX_NEURON_DIFFERENTIATION                         | -0.68 | 0.07 | 0 | 0 | 0 | not significant |
| 5400 | GO_INOSITOL_METABOLIC_PROCESS                                     | -0.68 | 0.07 | 0 | 0 | 0 | not significant |
| 5401 | GO_MEMBRANOUS_SEPTUM_MORPHOGENESIS                                | -0.68 | 0.07 | 0 | 0 | 0 | not significant |
| 5402 | GO_NUCLEAR_NCRNA_SURVEILLANCE                                     | -0.68 | 0.07 | 0 | 0 | 0 | not significant |
| 5403 | GO_POSITIVE_REGULATION_OF_SMOOTH_MUSCLE_CONTRACTION               | -0.68 | 0.07 | 0 | 0 | 0 | not significant |
| 5404 | GO_REGULATION_OF_BICELLULAR_TIGHT_JUNCTION_ASSEMBLY               | -0.68 | 0.07 | 0 | 0 | 0 | not significant |
| 5405 | REACTOME_DCC_MEDIATED_ATTRACTIVE_SIGNALING                        | -0.68 | 0.07 | 0 | 0 | 0 | not significant |
| 5406 | WANG_RESPONSE_TO_FORSKOLIN_DN                                     | -0.68 | 0.07 | 0 | 0 | 0 | not significant |
| 5407 | BIOCARTA_MALATEX_PATHWAY                                          | -0.68 | 0.06 | 0 | 0 | 0 | not significant |
| 5408 | CHR2P14                                                           | -0.68 | 0.06 | 0 | 0 | 0 | not significant |
| 5409 | GO_INNER_CELL_MASS_CELL_PROLIFERATION                             | -0.68 | 0.06 | 0 | 0 | 0 | not significant |
| 5410 | GO_NEGATIVE_REGULATION_OF_ACTIVATED_T_CELL_PROLIFERATION          | -0.68 | 0.06 | 0 | 0 | 0 | not significant |
| 5411 | GO_POSITIVE_REGULATION_OF_ENDOPLASMIC_RETICULUM_UNFOLDED_PROTEIN  | -0.68 | 0.06 | 0 | 0 | 0 | not significant |
| 5412 | REACTOME_REGULATION_OF_GENE_EXPRESSION_IN_LATE_STAGE_BRANCHING_M  | -0.68 | 0.06 | 0 | 0 | 0 | not significant |
| 5413 | REACTOME_TICAM1_TRAF6_DEPENDENT_INDUCION_OF_TAK1_COMPLEX          | -0.68 | 0.06 | 0 | 0 | 0 | not significant |
| 5414 | GAUSSMANN_MLL_AF4_FUSION_TARGETS_D_UP                             | -0.68 | 0.05 | 0 | 0 | 0 | not significant |
| 5415 | GO_CARDIAC_MUSCLE_CELL_MEMBRANE_REPOLARIZATION                    | -0.68 | 0.05 | 0 | 0 | 0 | not significant |
| 5416 | GO_PRR19_COMPLEX                                                  | -0.68 | 0.05 | 0 | 0 | 0 | not significant |
| 5417 | GO_QUINONE_BINDING                                                | -0.68 | 0.05 | 0 | 0 | 0 | not significant |
| 5418 | BIOCARTA_CERAMIDE_PATHWAY                                         | -0.68 | 0.04 | 0 | 0 | 0 | not significant |
| 5419 | GO_NEURAL_TUBE_PATTERNING                                         | -0.68 | 0.04 | 0 | 0 | 0 | not significant |
| 5420 | GO_PRC1_COMPLEX                                                   | -0.68 | 0.04 | 0 | 0 | 0 | not significant |
| 5421 | GO_CALCIUM_ION_IMPORT                                             | -0.68 | 0.03 | 0 | 0 | 0 | not significant |
| 5422 | GO_HYDRO_LYASE_ACTIVITY                                           | -0.68 | 0.03 | 0 | 0 | 0 | not significant |
| 5423 | GO_HYDROLASE_ACTIVITY_ACTING_ON_CARBON_NITROGEN_BUT_NOT_PEPTIDE_  | -0.68 | 0.03 | 0 | 0 | 0 | not significant |
| 5424 | CHR1P32                                                           | -0.68 | 0.02 | 0 | 0 | 0 | not significant |
| 5425 | PID_INSULIN_PATHWAY                                               | -0.68 | 0.02 | 0 | 0 | 0 | not significant |
| 5426 | REACTOME_G_ALPHA_12_13_SIGNALING_EVENTS                           | -0.68 | 0.02 | 0 | 0 | 0 | not significant |
| 5427 | GO_IRON_ION_HOMEOSTASIS                                           | -0.68 | 0.01 | 0 | 0 | 0 | not significant |
| 5428 | GO_BCL_2_FAMILY_PROTEIN_COMPLEX                                   | -0.67 | 0.08 | 0 | 0 | 0 | not significant |
| 5429 | GO_NEURON_INTRINSIC_APOPTOTIC_SIGNALING_PATHWAY_IN_RESPONSE_TO_OX | -0.67 | 0.08 | 0 | 0 | 0 | not significant |
| 5430 | GO_DNA_METHYLTRANSFERASE_ACTIVITY                                 | -0.67 | 0.07 | 0 | 0 | 0 | not significant |
| 5431 | GO_EMBRYONIC_DIGESTIVE_TRACT_DEVELOPMENT                          | -0.67 | 0.07 | 0 | 0 | 0 | not significant |
| 5432 | GO_MYOSIN_FILAMENT_ORGANIZATION                                   | -0.67 | 0.07 | 0 | 0 | 0 | not significant |
| 5433 | GO_REGULATION_OF_RESPONSE_TO_TUMOR_CELL                           | -0.67 | 0.07 | 0 | 0 | 0 | not significant |
| 5434 | NOUSHMEHR_GBM_SOMATIC_MUTATED                                     | -0.67 | 0.07 | 0 | 0 | 0 | not significant |
| 5435 | REACTOME_MITOCHONDRIAL_FATTY_ACID_BETA_OXIDATION_OF_UNSATURATED_  | -0.67 | 0.07 | 0 | 0 | 0 | not significant |
| 5436 | GO_ADENOSINE_DEAMINASE_ACTIVITY                                   | -0.67 | 0.06 | 0 | 0 | 0 | not significant |
| 5437 | GO_POSITIVE_REGULATION_OF_PROTEIN_LOCALIZATION_TO_EARLY_ENDOSOME  | -0.67 | 0.06 | 0 | 0 | 0 | not significant |
| 5438 | GO_RNA_POLYMERASE_I_PREINITIATION_COMPLEX_ASSEMBLY                | -0.67 | 0.06 | 0 | 0 | 0 | not significant |

|      |                                                                   |       |      |   |   |   |                 |
|------|-------------------------------------------------------------------|-------|------|---|---|---|-----------------|
| 5439 | NIKOLSKY_BREAST_CANCER_1Q32_AMPlicON                              | -0.67 | 0.06 | 0 | 0 | 0 | not significant |
| 5440 | PID_LPA4_PATHWAY                                                  | -0.67 | 0.06 | 0 | 0 | 0 | not significant |
| 5441 | GO_ALDO_KETO_REDUCTASE_NADP_ACTIVITY                              | -0.67 | 0.05 | 0 | 0 | 0 | not significant |
| 5442 | GO_PROTEIN_CONTAINING_COMPLEX_REMODELING                          | -0.67 | 0.05 | 0 | 0 | 0 | not significant |
| 5443 | NIKOLSKY_OVERCONNECTED_IN_BREAST_CANCER                           | -0.67 | 0.05 | 0 | 0 | 0 | not significant |
| 5444 | GO_REGULATION_OF_CELL_ADHESION_MEDIATED_BY_INTEGRIN               | -0.67 | 0.04 | 0 | 0 | 0 | not significant |
| 5445 | GO_REGULATION_OF_EXECUTION_PHASE_OF_APOPTOSIS                     | -0.67 | 0.04 | 0 | 0 | 0 | not significant |
| 5446 | GO_ACETYL_COA_BIOSYNTHETIC_PROCESS                                | -0.67 | 0.03 | 0 | 0 | 0 | not significant |
| 5447 | GO_DETECTION_OF_LIGHT_STIMULUS                                    | -0.67 | 0.03 | 0 | 0 | 0 | not significant |
| 5448 | GO_POSITIVE_REGULATION_OF_CELL_MATRIX_ADHESION                    | -0.67 | 0.03 | 0 | 0 | 0 | not significant |
| 5449 | GO_HISTONE_LYSINE_N_METHYLTRANSFERASE_ACTIVITY                    | -0.67 | 0.02 | 0 | 0 | 0 | not significant |
| 5450 | GO_IRON_4_SULFUR_CLUSTER_BINDING                                  | -0.67 | 0.01 | 0 | 0 | 0 | not significant |
| 5451 | GO_POSITIVE_REGULATION_OF_CALCIIUM_IION_TRANSMEMBRANE_TRANSPORT   | -0.67 | 0.01 | 0 | 0 | 0 | not significant |
| 5452 | GO_POSITIVE_REGULATION_OF_CALCIIUM_IION_TRANSPORT                 | -0.67 | 0.01 | 0 | 0 | 0 | not significant |
| 5453 | GO_ESTABLISHMENT_OF_GOLGI_LOCALIZATION                            | -0.66 | 0.07 | 0 | 0 | 0 | not significant |
| 5454 | GO_HYPOTHALAMUS_DEVELOPMENT                                       | -0.66 | 0.07 | 0 | 0 | 0 | not significant |
| 5455 | PID_CONE_PATHWAY                                                  | -0.66 | 0.07 | 0 | 0 | 0 | not significant |
| 5456 | BIOCARTA_CDC25_PATHWAY                                            | -0.66 | 0.06 | 0 | 0 | 0 | not significant |
| 5457 | GO_CALCIIUM_IMPORT_INTO_THE_MITOCHONDRION                         | -0.66 | 0.06 | 0 | 0 | 0 | not significant |
| 5458 | GO_HETEROCHROMATIN_ASSEMBLY                                       | -0.66 | 0.06 | 0 | 0 | 0 | not significant |
| 5459 | GO_INTERFERON_BETA_BIOSYNTHETIC_PROCESS                           | -0.66 | 0.06 | 0 | 0 | 0 | not significant |
| 5460 | GO_NEGATIVE_REGULATION_OF_CELLULAR_RESPONSE_TO_DRUG               | -0.66 | 0.06 | 0 | 0 | 0 | not significant |
| 5461 | GO_NEGATIVE_REGULATION_OF_DIGESTIVE_SYSTEM_PROCESS                | -0.66 | 0.06 | 0 | 0 | 0 | not significant |
| 5462 | GO_POSITIVE_REGULATION_OF_PEROXSOME_PROLIFERATOR_ACTIVATED_RECE   | -0.66 | 0.06 | 0 | 0 | 0 | not significant |
| 5463 | GO_REGULATION_OF_SEQUESTERING_OF_TRIGLYCERIDE                     | -0.66 | 0.06 | 0 | 0 | 0 | not significant |
| 5464 | GO_RNA_POLYMERASE_I_REGULATORY_REGION_DNA_BINDING                 | -0.66 | 0.06 | 0 | 0 | 0 | not significant |
| 5465 | WATANABE_ULCERATIVE_COLITIS_WITH_CANCER_UP                        | -0.66 | 0.06 | 0 | 0 | 0 | not significant |
| 5466 | GO_3_UTR_MEDIATED_MRNA_DESTABILIZATION                            | -0.66 | 0.05 | 0 | 0 | 0 | not significant |
| 5467 | GO_PHOSPHOTRANSFERASE_ACTIVITY_FOR_OTHER_SUBSTITUTED_PHOSPHATE    | -0.66 | 0.05 | 0 | 0 | 0 | not significant |
| 5468 | GO_REGULATION_OF_MEMBRANE_REPOLARIZATION                          | -0.66 | 0.05 | 0 | 0 | 0 | not significant |
| 5469 | REACTOME_RHO_GTPASES_ACTIVATE_ROCKS                               | -0.66 | 0.05 | 0 | 0 | 0 | not significant |
| 5470 | YH_RESPONSE_TO_ARSENITE_C2                                        | -0.66 | 0.05 | 0 | 0 | 0 | not significant |
| 5471 | GO_DOSAGE_COMPENSATION                                            | -0.66 | 0.04 | 0 | 0 | 0 | not significant |
| 5472 | REACTOME_PURINE_SALVAGE                                           | -0.66 | 0.04 | 0 | 0 | 0 | not significant |
| 5473 | GO_ADENYLATE_CYCLASE_INHIBITING_G_PROTEIN_COUPLED_RECEPTOR_SIGNAL | -0.66 | 0.03 | 0 | 0 | 0 | not significant |
| 5474 | GO_EPHRIN_RECEPTOR_BINDING                                        | -0.66 | 0.03 | 0 | 0 | 0 | not significant |
| 5475 | GO_PHOSPHATIDYLINOSITOL_PHOSPHATASE_ACTIVITY                      | -0.66 | 0.03 | 0 | 0 | 0 | not significant |
| 5476 | KEGG_SNARE_INTERACTIONS_IN_VESICULAR_TRANSPORT                    | -0.66 | 0.03 | 0 | 0 | 0 | not significant |
| 5477 | REACTOME_DETOXIFICATION_OF_REACTIVE_OXYGEN_SPECIES                | -0.66 | 0.03 | 0 | 0 | 0 | not significant |
| 5478 | BIOCARTA_IL1R_PATHWAY                                             | -0.66 | 0.02 | 0 | 0 | 0 | not significant |
| 5479 | EBAUER_TARGETS_OF_PAX3_FOXO1_FUSION_DN                            | -0.66 | 0.02 | 0 | 0 | 0 | not significant |
| 5480 | GO_MYOFIBRIL_ASSEMBLY                                             | -0.66 | 0.02 | 0 | 0 | 0 | not significant |
| 5481 | GO_NUCLEOTIDE_EXCISION_REPAIR_PREINCISION_COMPLEX_ASSEMBLY        | -0.66 | 0.02 | 0 | 0 | 0 | not significant |
| 5482 | GO_TRANSITION_METAL_IION_TRANSMEMBRANE_TRANSPORTER_ACTIVITY       | -0.66 | 0.02 | 0 | 0 | 0 | not significant |
| 5483 | GO_POSITIVE_REGULATION_OF_TOR_SIGNALING                           | -0.66 | 0.01 | 0 | 0 | 0 | not significant |
| 5484 | REACTOME_EPH_EPHRIN_SIGNALING                                     | -0.66 | 0.01 | 0 | 0 | 0 | not significant |
| 5485 | CHEBOTAEV_GR_TARGETS_DN                                           | -0.66 | 0    | 0 | 0 | 0 | not significant |
| 5486 | GO_CALCIIUM_IION_REGULATED_EXOCYTOSIS                             | -0.66 | 0    | 0 | 0 | 0 | not significant |
| 5487 | GO_DNA_CYTOSINE_DEAMINATION                                       | -0.65 | 0.06 | 0 | 0 | 0 | not significant |
| 5488 | GO_DOPAMINE_METABOLIC_PROCESS                                     | -0.65 | 0.06 | 0 | 0 | 0 | not significant |
| 5489 | GO_HIGH_DENSITY_LIPOPROTEIN_PARTICLE_REMODELING                   | -0.65 | 0.06 | 0 | 0 | 0 | not significant |
| 5490 | GO_MACROPHAGE_APOPTOTIC_PROCESS                                   | -0.65 | 0.06 | 0 | 0 | 0 | not significant |
| 5491 | GO_PROSTANOID_RECEPTOR_ACTIVITY                                   | -0.65 | 0.06 | 0 | 0 | 0 | not significant |
| 5492 | GO_SPERMATOPROTEASOME_COMPLEX                                     | -0.65 | 0.06 | 0 | 0 | 0 | not significant |
| 5493 | GO_VOICALIZATION_BEHAVIOR                                         | -0.65 | 0.06 | 0 | 0 | 0 | not significant |
| 5494 | GLI1_UP_V1_DN                                                     | -0.65 | 0.05 | 0 | 0 | 0 | not significant |
| 5495 | GO_ESTABLISHMENT_OF_CENTROSOME_LOCALIZATION                       | -0.65 | 0.05 | 0 | 0 | 0 | not significant |
| 5496 | GO_IRON_IION_TRANSMEMBRANE_TRANSPORT                              | -0.65 | 0.05 | 0 | 0 | 0 | not significant |
| 5497 | GO_MEIOTIC_CHROMOSOME_CONDENSATION                                | -0.65 | 0.05 | 0 | 0 | 0 | not significant |
| 5498 | GO_PHOTORECEPTOR_OUTER_SEGMENT_MEMBRANE                           | -0.65 | 0.05 | 0 | 0 | 0 | not significant |
| 5499 | GO_PROTEIN_TAG                                                    | -0.65 | 0.05 | 0 | 0 | 0 | not significant |
| 5500 | GO_REGULATION_OF_SECONDARY_HEART_FIELD_CARDIOBLAST_PROLIFERATION  | -0.65 | 0.05 | 0 | 0 | 0 | not significant |
| 5501 | REACTOME_NITRIC_OXIDE_STIMULATES_GUANYLATE_CYCLASE                | -0.65 | 0.05 | 0 | 0 | 0 | not significant |
| 5502 | REACTOME_REGULATION_OF_BETA_CELL_DEVELOPMENT                      | -0.65 | 0.05 | 0 | 0 | 0 | not significant |
| 5503 | REACTOME_RUNX2_REGULATES_GENES_INVOLVED_IN_CELL_MIGRATION         | -0.65 | 0.05 | 0 | 0 | 0 | not significant |
| 5504 | PID_TOLL_ENDOGENOUS_PATHWAY                                       | -0.65 | 0.04 | 0 | 0 | 0 | not significant |
| 5505 | REACTOME_ZINC_TRANSPORTERS                                        | -0.65 | 0.04 | 0 | 0 | 0 | not significant |
| 5506 | GO_ACTIN_CORTICAL_PATCH                                           | -0.65 | 0.03 | 0 | 0 | 0 | not significant |
| 5507 | KANG_GIST_WITH_PDGFR_A_UP                                         | -0.65 | 0.03 | 0 | 0 | 0 | not significant |
| 5508 | REACTOME_NUCLEOTIDE_SALVAGE                                       | -0.65 | 0.03 | 0 | 0 | 0 | not significant |
| 5509 | GO_PEPTIDYL_LYSINE_TRIMETHYLATION                                 | -0.65 | 0.02 | 0 | 0 | 0 | not significant |
| 5510 | GO_REGULATION_OF_CENTRIOLE_REPLICATION                            | -0.65 | 0.02 | 0 | 0 | 0 | not significant |
| 5511 | GO_REGULATION_OF_EPIDERMAL_CELL_DIFFERENTIATION                   | -0.65 | 0.02 | 0 | 0 | 0 | not significant |
| 5512 | REACTOME_MICROAUTOPHAGY                                           | -0.65 | 0.02 | 0 | 0 | 0 | not significant |
| 5513 | GO_CHONDROITIN_SULFATE_BINDING                                    | -0.64 | 0.06 | 0 | 0 | 0 | not significant |
| 5514 | GO_LATE_ENDOSOME_TO_VACUOLE_TRANSPORT_VIA_MULTIVESICULAR_BODY_S   | -0.64 | 0.06 | 0 | 0 | 0 | not significant |
| 5515 | GO_G_PROTEIN_BETA_GAMMA_SUBUNIT_COMPLEX_BINDING                   | -0.64 | 0.05 | 0 | 0 | 0 | not significant |
| 5516 | GO_PALMITOYL_COA_HYDROLASE_ACTIVITY                               | -0.64 | 0.05 | 0 | 0 | 0 | not significant |
| 5517 | GO_POSTSYNAPTIC_MEMBRANE_ASSEMBLY                                 | -0.64 | 0.05 | 0 | 0 | 0 | not significant |
| 5518 | GO_RESPONSE_TO_CAFFEINE                                           | -0.64 | 0.05 | 0 | 0 | 0 | not significant |
| 5519 | GO_SEQUESTERING_OF_ACTIN_MONOMERS                                 | -0.64 | 0.05 | 0 | 0 | 0 | not significant |
| 5520 | REACTOME_APOBEC3G_MEDIATED_RESISTANCE_TO_HIV_1_INFECTION          | -0.64 | 0.05 | 0 | 0 | 0 | not significant |
| 5521 | REACTOME_FREE_FATTY_ACIDS_REGULATE_INSULIN_SECRETION              | -0.64 | 0.05 | 0 | 0 | 0 | not significant |
| 5522 | FIGUEROA_AML_METHYLATION_CLUSTER_6_DN                             | -0.64 | 0.04 | 0 | 0 | 0 | not significant |
| 5523 | GO_CHONDROCYTE_DIFFERENTIATION_INVOLVED_IN_ENDOCHONDRAL_BONE_MO   | -0.64 | 0.04 | 0 | 0 | 0 | not significant |
| 5524 | GO_NEUROMUSCULAR_PROCESS_CONTROLLING_POSTURE                      | -0.64 | 0.04 | 0 | 0 | 0 | not significant |
| 5525 | GO_PIRNA_METABOLIC_PROCESS                                        | -0.64 | 0.04 | 0 | 0 | 0 | not significant |
| 5526 | GO_REGULATION_OF_URINE_VOLUME                                     | -0.64 | 0.04 | 0 | 0 | 0 | not significant |
| 5527 | MCMURRAY_TP53_HRAS_COOPERATION_RESPONSE_UP                        | -0.64 | 0.04 | 0 | 0 | 0 | not significant |
| 5528 | BIOCARTA_TGFB_PATHWAY                                             | -0.64 | 0.03 | 0 | 0 | 0 | not significant |
| 5529 | GO_CELLULAR_RESPONSE_TO_DSRNA                                     | -0.64 | 0.03 | 0 | 0 | 0 | not significant |
| 5530 | GO_COPI_COATED_VESICLE                                            | -0.64 | 0.03 | 0 | 0 | 0 | not significant |
| 5531 | GO_CHONDROCYTE_DIFFERENTIATION                                    | -0.64 | 0.01 | 0 | 0 | 0 | not significant |
| 5532 | GO_REGULATION_OF_MUSCLE_HYPERTROPHY                               | -0.64 | 0.01 | 0 | 0 | 0 | not significant |
| 5533 | HOFFMANN_IMMATURE_TO_MATURE_B_LYMPHOCYTE_DN                       | -0.64 | 0.01 | 0 | 0 | 0 | not significant |
| 5534 | LEE_LIVER_CANCER_E2F1_DN                                          | -0.64 | 0.01 | 0 | 0 | 0 | not significant |
| 5535 | GO_PIGMENTATION                                                   | -0.64 | 0    | 0 | 0 | 0 | not significant |
| 5536 | GO_CORECEPTOR_ACTIVITY_INVOLVED_IN_WNT_SIGNALING_PATHWAY          | -0.63 | 0.06 | 0 | 0 | 0 | not significant |
| 5537 | GO_CYTIDINE_DEAMINASE_ACTIVITY                                    | -0.63 | 0.05 | 0 | 0 | 0 | not significant |
| 5538 | GO_HISTONE_THREONINE_KINASE_ACTIVITY                              | -0.63 | 0.05 | 0 | 0 | 0 | not significant |
| 5539 | GO_POST_EMBRYONIC_EYE_MORPHOGENESIS                               | -0.63 | 0.05 | 0 | 0 | 0 | not significant |
| 5540 | GO_THIOREDOXIN_PEROXIDASE_ACTIVITY                                | -0.63 | 0.05 | 0 | 0 | 0 | not significant |
| 5541 | INAMURA_LUNG_CANCER_SCC_DN                                        | -0.63 | 0.05 | 0 | 0 | 0 | not significant |
| 5542 | CHR1P12                                                           | -0.63 | 0.04 | 0 | 0 | 0 | not significant |
| 5543 | GO_CIRCADIAN_SLEEP_WAKE_CYCLE                                     | -0.63 | 0.04 | 0 | 0 | 0 | not significant |
| 5544 | GO_HISTONE_ACETYLTRANSFERASE_ACTIVITY_H4_K5_SPECIFIC              | -0.63 | 0.04 | 0 | 0 | 0 | not significant |
| 5545 | GO_PHOSPHATIDYLINOSITOL_PHOSPHATE_4_PHOSPHATASE_ACTIVITY          | -0.63 | 0.04 | 0 | 0 | 0 | not significant |
| 5546 | GO_POSITIVE_REGULATION_OF_ALCOHOL_BIOSYNTHETIC_PROCESS            | -0.63 | 0.04 | 0 | 0 | 0 | not significant |
| 5547 | GO_POSTSYNAPSE_ASSEMBLY                                           | -0.63 | 0.04 | 0 | 0 | 0 | not significant |

|      |                                                                     |       |      |   |   |   |                 |
|------|---------------------------------------------------------------------|-------|------|---|---|---|-----------------|
| 5548 | HALLMARK_PANCREAS_BETA_CELLS                                        | -0.63 | 0.03 | 0 | 0 | 0 | not significant |
| 5549 | PAPASPYRIDONOS_UNSTABLE_ATHEROSCLEROTIC_PLAQUE_DN                   | -0.63 | 0.03 | 0 | 0 | 0 | not significant |
| 5550 | REACTOME_VXPX_CARGO_TARGETING_TO_CILIUM                             | -0.63 | 0.03 | 0 | 0 | 0 | not significant |
| 5551 | TERAMOTO_OPN_TARGETS_CLUSTER_6                                      | -0.63 | 0.03 | 0 | 0 | 0 | not significant |
| 5552 | XU_GH1_EXOGENOUS_TARGETS_UP                                         | -0.63 | 0.02 | 0 | 0 | 0 | not significant |
| 5553 | KEGG_OXIDATIVE_PHOSPHORYLATION                                      | -0.63 | 0    | 0 | 0 | 0 | not significant |
| 5554 | REACTOME_BLOOD_GROUP_SYSTEMS_BIOSYNTHESIS                           | -0.62 | 0.06 | 0 | 0 | 0 | not significant |
| 5555 | GO_ATP_DEPENDENT_MICROTUBULE_MOTOR_ACTIVITY_MINUS_END_DIRECTED      | -0.62 | 0.05 | 0 | 0 | 0 | not significant |
| 5556 | GO_CHROMO_SHADOW_DOMAIN_BINDING                                     | -0.62 | 0.05 | 0 | 0 | 0 | not significant |
| 5557 | GO_G_PROTEIN_COUPLED_ACETYLCHOLINE_RECEPTOR_SIGNALING_PATHWAY       | -0.62 | 0.05 | 0 | 0 | 0 | not significant |
| 5558 | GO_HEPATOCYTE_GROWTH_FACTOR_RECEPTOR_SIGNALING_PATHWAY              | -0.62 | 0.05 | 0 | 0 | 0 | not significant |
| 5559 | GO_HISTONE_THREONINE_PHOSPHORYLATION                                | -0.62 | 0.05 | 0 | 0 | 0 | not significant |
| 5560 | GO_MONOCYTE_ACTIVATION                                              | -0.62 | 0.05 | 0 | 0 | 0 | not significant |
| 5561 | GO_PROTEIN_INSERTION_INTO_ER_MEMBRANE                               | -0.62 | 0.05 | 0 | 0 | 0 | not significant |
| 5562 | MOTAMED_RESPONSE_TO_ANDROGEN_DN                                     | -0.62 | 0.05 | 0 | 0 | 0 | not significant |
| 5563 | SETLUR_PROSTATE_CANCER_TMPRSS2_ERG_FUSION_DN                        | -0.62 | 0.05 | 0 | 0 | 0 | not significant |
| 5564 | CERVERA_SDHB_TARGETS_1_DN                                           | -0.62 | 0.04 | 0 | 0 | 0 | not significant |
| 5565 | GO_MAMMARY_GLAND_ALVEOLUS_DEVELOPMENT                               | -0.62 | 0.04 | 0 | 0 | 0 | not significant |
| 5566 | GO_NEURON_CELL_CELL_ADHESION                                        | -0.62 | 0.04 | 0 | 0 | 0 | not significant |
| 5567 | GO_POSITIVE_REGULATION_OF_AUTOPHAGOSOME_MATURATION                  | -0.62 | 0.04 | 0 | 0 | 0 | not significant |
| 5568 | GO_POSITIVE_REGULATION_OF_MYELOID_CELL_APOPTOTIC_PROCESS            | -0.62 | 0.04 | 0 | 0 | 0 | not significant |
| 5569 | GO_REGULATION_OF_MYOSIN_LIGHT_CHAIN_PHOSPHATASE_ACTIVITY            | -0.62 | 0.04 | 0 | 0 | 0 | not significant |
| 5570 | GO_RESPONSE_TO_HERBICIDE                                            | -0.62 | 0.04 | 0 | 0 | 0 | not significant |
| 5571 | GO_REVERSE_CHOLESTEROL_TRANSPORT                                    | -0.62 | 0.04 | 0 | 0 | 0 | not significant |
| 5572 | GO_DEOXYRIBONUCLEOSIDE_TRIPHOSPHATE_BIOSYNTHETIC_PROCESS            | -0.62 | 0.03 | 0 | 0 | 0 | not significant |
| 5573 | VALK_AML_CLUSTER_5                                                  | -0.62 | 0.03 | 0 | 0 | 0 | not significant |
| 5574 | BIOCARTA_RHO_PATHWAY                                                | -0.62 | 0.02 | 0 | 0 | 0 | not significant |
| 5575 | GO_POSITIVE_REGULATION_OF_AXON_EXTENSION                            | -0.62 | 0.01 | 0 | 0 | 0 | not significant |
| 5576 | GO_OXIDOREDUCTASE_ACTIVITY_ACTING_ON_NAD_P_H                        | -0.62 | 0    | 0 | 0 | 0 | not significant |
| 5577 | GO_ACTIN_CORTICAL_PATCH_LOCALIZATION                                | -0.61 | 0.05 | 0 | 0 | 0 | not significant |
| 5578 | GO_DETECTION_OF_MECHANICAL_STIMULUS_INVOLVED_IN_SENSORY_PERCEPTOR   | -0.61 | 0.05 | 0 | 0 | 0 | not significant |
| 5579 | GO_OXIDOREDUCTASE_ACTIVITY_ACTING_ON_PAIRRED_DONORS_WITH_INCORPOR   | -0.61 | 0.05 | 0 | 0 | 0 | not significant |
| 5580 | GO_POSITIVE_REGULATION_OF_INTERFERON_GAMMA_BIOSYNTHETIC_PROCESS     | -0.61 | 0.05 | 0 | 0 | 0 | not significant |
| 5581 | GO_PROGRAMMED_CELL_DEATH_INVOLVED_IN_CELL_DEVELOPMENT               | -0.61 | 0.05 | 0 | 0 | 0 | not significant |
| 5582 | GO_SPANNING_COMPONENT_OF_MEMBRANE                                   | -0.61 | 0.05 | 0 | 0 | 0 | not significant |
| 5583 | GO_CIRCADIAN_SLEEP_WAKE_CYCLE_SLEEP                                 | -0.61 | 0.04 | 0 | 0 | 0 | not significant |
| 5584 | GO_L_PHENYLALANINE_CATABOLIC_PROCESS                                | -0.61 | 0.04 | 0 | 0 | 0 | not significant |
| 5585 | GO_LIPID_DROPLET_ORGANIZATION                                       | -0.61 | 0.04 | 0 | 0 | 0 | not significant |
| 5586 | GO_NEGATIVE_REGULATION_OF_SYNAPSE_ORGANIZATION                      | -0.61 | 0.04 | 0 | 0 | 0 | not significant |
| 5587 | OXFORD_RALA_TARGETS_DN                                              | -0.61 | 0.04 | 0 | 0 | 0 | not significant |
| 5588 | GO_REGULATION_OF_CELL_GROWTH_INVOLVED_IN_CARDIAC_MUSCLE_CELL_DE     | -0.61 | 0.03 | 0 | 0 | 0 | not significant |
| 5589 | GO_REGULATION_OF_RECEPTOR_BINDING                                   | -0.61 | 0.03 | 0 | 0 | 0 | not significant |
| 5590 | CHR2Q23                                                             | -0.61 | 0.02 | 0 | 0 | 0 | not significant |
| 5591 | GO_CHONDROCYTE_DEVELOPMENT                                          | -0.61 | 0.02 | 0 | 0 | 0 | not significant |
| 5592 | GO_REGULATION_OF_RESPONSE_TO_INTERFERON_GAMMA                       | -0.61 | 0.01 | 0 | 0 | 0 | not significant |
| 5593 | TBK1.DN.48HRS_DN                                                    | -0.61 | 0.01 | 0 | 0 | 0 | not significant |
| 5594 | GO_AMINO_ACID_BETAINE_METABOLIC_PROCESS                             | -0.60 | 0.05 | 0 | 0 | 0 | not significant |
| 5595 | GO_ADULT_HEART_DEVELOPMENT                                          | -0.60 | 0.04 | 0 | 0 | 0 | not significant |
| 5596 | GO_C4_DICARBOXYLATE_TRANSMEMBRANE_TRANSPORTER_ACTIVITY              | -0.60 | 0.04 | 0 | 0 | 0 | not significant |
| 5597 | GO_CALCIIUM_IION_IMPORT_INTO_CYTOSOL                                | -0.60 | 0.04 | 0 | 0 | 0 | not significant |
| 5598 | GO_FEMALE_GENITALIA_DEVELOPMENT                                     | -0.60 | 0.04 | 0 | 0 | 0 | not significant |
| 5599 | GO_POST_EMBRYONIC_ANIMAL_ORGAN_MORPHOGENESIS                        | -0.60 | 0.04 | 0 | 0 | 0 | not significant |
| 5600 | KANG_GIST_WITH_PDFGRA_DN                                            | -0.60 | 0.04 | 0 | 0 | 0 | not significant |
| 5601 | REACTOME_PHENYLALANINE_AND_TYROSINE_METABOLISM                      | -0.60 | 0.04 | 0 | 0 | 0 | not significant |
| 5602 | GO_POST_EMBRYONIC_ANIMAL_MORPHOGENESIS                              | -0.60 | 0.03 | 0 | 0 | 0 | not significant |
| 5603 | GO_PROTON_TRANSPORTING_TWO_SECTOR_ATPASE_COMPLEX_ASSEMBLY           | -0.60 | 0.03 | 0 | 0 | 0 | not significant |
| 5604 | SINGH_NFE2L2_TARGETS                                                | -0.60 | 0.03 | 0 | 0 | 0 | not significant |
| 5605 | GO_CRANIAL_NERVE_DEVELOPMENT                                        | -0.60 | 0.02 | 0 | 0 | 0 | not significant |
| 5606 | GO_NEGATIVE_REGULATION_OF_NEURAL_PRECURSOR_CELL_PROLIFERATION       | -0.60 | 0.02 | 0 | 0 | 0 | not significant |
| 5607 | GO_RESPONSE_TO_INCREASED_OXYGEN_LEVELS                              | -0.60 | 0.02 | 0 | 0 | 0 | not significant |
| 5608 | REACTOME_THE_PHOTOTRANSDUCTION_CASCADE                              | -0.60 | 0.02 | 0 | 0 | 0 | not significant |
| 5609 | GO_NUCLEAR_HETEROCHROMATIN                                          | -0.60 | 0.01 | 0 | 0 | 0 | not significant |
| 5610 | GO_EYE_MORPHOGENESIS                                                | -0.60 | 0    | 0 | 0 | 0 | not significant |
| 5611 | GO_INTERFERON_GAMMA_BIOSYNTHETIC_PROCESS                            | -0.59 | 0.05 | 0 | 0 | 0 | not significant |
| 5612 | GO_EXTRACELLULAR_MATRIX_CONSTITUENT_CONFERRING_ELASTICITY           | -0.59 | 0.04 | 0 | 0 | 0 | not significant |
| 5613 | GO_NEGATIVE_REGULATION_OF_CYSSTEINE_TYPE_ENDOPEPTIDASE_ACTIVITY_INV | -0.59 | 0.04 | 0 | 0 | 0 | not significant |
| 5614 | GO_PROTEIN_PHOSPHATASE_2B_BINDING                                   | -0.59 | 0.04 | 0 | 0 | 0 | not significant |
| 5615 | GO_SPHINGOMYELIN_BIOSYNTHETIC_PROCESS                               | -0.59 | 0.04 | 0 | 0 | 0 | not significant |
| 5616 | GO_SYNAPTIC_VESICLE_MATURATION                                      | -0.59 | 0.04 | 0 | 0 | 0 | not significant |
| 5617 | GO_CELLULAR_RESPONSE_TO_ATP                                         | -0.59 | 0.03 | 0 | 0 | 0 | not significant |
| 5618 | GO_OXIDOREDUCTASE_ACTIVITY_ACTING_ON_THE_CH_NH_GROUP_OF_DONORS      | -0.59 | 0.03 | 0 | 0 | 0 | not significant |
| 5619 | GO_PEPTIDE_DISULFIDE_OXIDOREDUCTASE_ACTIVITY                        | -0.59 | 0.03 | 0 | 0 | 0 | not significant |
| 5620 | GO_POSITIVE_REGULATION_OF_HEART_RATE                                | -0.59 | 0.03 | 0 | 0 | 0 | not significant |
| 5621 | GO_REGULATION_OF_POSTSYNAPTIC_NEUROTRANSMITTER_RECEPTOR_INTERNA     | -0.59 | 0.03 | 0 | 0 | 0 | not significant |
| 5622 | MATZUK_POSTIMPLANTATION_AND_POSTPARTUM                              | -0.59 | 0.03 | 0 | 0 | 0 | not significant |
| 5623 | SA_PROGRAMMED_CELL_DEATH                                            | -0.59 | 0.03 | 0 | 0 | 0 | not significant |
| 5624 | BANDRES_RESPONSE_TO_CARMUSTIN_MGMT_24HR_DN                          | -0.59 | 0.02 | 0 | 0 | 0 | not significant |
| 5625 | MATZUK_POST-IMPLANTATION_AND_POST-PARTUM                            | -0.59 | 0.02 | 0 | 0 | 0 | not significant |
| 5626 | GO_PRESYNAPTIC_ACTIVE_ZONE_MEMBRANE                                 | -0.59 | 0.01 | 0 | 0 | 0 | not significant |
| 5627 | GO_REGULATION_OF_SMOOTH_MUSCLE_CONTRACTION                          | -0.59 | 0.01 | 0 | 0 | 0 | not significant |
| 5628 | BENPORATH_ES_CORE_NINE                                              | -0.58 | 0.03 | 0 | 0 | 0 | not significant |
| 5629 | GO_EXTRACELLULAR_MATRIX_STRUCTURAL_CONSTITUENT_CONFERRING_COMPF     | -0.58 | 0.03 | 0 | 0 | 0 | not significant |
| 5630 | GO_FERRIC_IRON_BINDING                                              | -0.58 | 0.03 | 0 | 0 | 0 | not significant |
| 5631 | GO_POSITIVE_REGULATION_OF_STEM_CELL_DIFFERENTIATION                 | -0.58 | 0.03 | 0 | 0 | 0 | not significant |
| 5632 | GO_S_ADENOSYLMETHIONINE_CYCLE                                       | -0.58 | 0.03 | 0 | 0 | 0 | not significant |
| 5633 | YAO_HOXA10_TARGETS_VIA_PROGESTERONE_DN                              | -0.58 | 0.03 | 0 | 0 | 0 | not significant |
| 5634 | BIOCARTA_MCALPAIN_PATHWAY                                           | -0.58 | 0.02 | 0 | 0 | 0 | not significant |
| 5635 | GO_DNA_UNWINDING_INVOLVED_IN_DNA_REPLICATION                        | -0.58 | 0.02 | 0 | 0 | 0 | not significant |
| 5636 | GO_GNANULOCYTE_MACROPHAGE_COLONY_STIMULATING_FACTOR_PRODUCTIOI      | -0.58 | 0.02 | 0 | 0 | 0 | not significant |
| 5637 | GO_REGULATION_OF_ADENYLATE_CYCLASE_ACTIVITY                         | -0.58 | 0.02 | 0 | 0 | 0 | not significant |
| 5638 | GO_REGULATION_OF_CARDIAC_MUSCLE_CELL_DIFFERENTIATION                | -0.58 | 0.02 | 0 | 0 | 0 | not significant |
| 5639 | GO_REGULATION_OF_METHYLATION_DEPENDENT_CHROMATIN_SILENCING          | -0.58 | 0.02 | 0 | 0 | 0 | not significant |
| 5640 | GO_RESPONSE_TO_FOOD                                                 | -0.58 | 0.02 | 0 | 0 | 0 | not significant |
| 5641 | GO_THO_COMPLEX                                                      | -0.58 | 0.02 | 0 | 0 | 0 | not significant |
| 5642 | KYNG_NORMAL_AGING_DN                                                | -0.58 | 0.02 | 0 | 0 | 0 | not significant |
| 5643 | MIKKELSEN_MEF_LCP_WITH_H3K27ME3                                     | -0.58 | 0.02 | 0 | 0 | 0 | not significant |
| 5644 | GO_FOREBRAIN_GENERATION_OF_NEURONS                                  | -0.58 | 0.01 | 0 | 0 | 0 | not significant |
| 5645 | GO_REGULATION_OF_EPIDERMIS_DEVELOPMENT                              | -0.58 | 0.01 | 0 | 0 | 0 | not significant |
| 5646 | REACTOME_G_BETA-GAMMA_SIGNALING_THROUGH_PI3KGAMMA                   | -0.58 | 0.01 | 0 | 0 | 0 | not significant |
| 5647 | XU_CREBBP_TARGETS_DN                                                | -0.58 | 0.01 | 0 | 0 | 0 | not significant |
| 5648 | GO_PEROXISOMAL_TRANSPORT                                            | -0.58 | 0    | 0 | 0 | 0 | not significant |
| 5649 | BIOCARTA_FREE_PATHWAY                                               | -0.57 | 0.03 | 0 | 0 | 0 | not significant |
| 5650 | GO_1_PHOSPHATIDYLINOSITOL_4_PHOSPHATE_3_KINASE_ACTIVITY             | -0.57 | 0.03 | 0 | 0 | 0 | not significant |
| 5651 | GO_HISTONE_H3_K36_DEMETHYLATION                                     | -0.57 | 0.03 | 0 | 0 | 0 | not significant |
| 5652 | GO_IMMUNE_RESPONSE_TO_TUMOR_CELL                                    | -0.57 | 0.03 | 0 | 0 | 0 | not significant |
| 5653 | GO_NEGATIVE_REGULATION_OF_HISTONE_H3_K4_METHYLATION                 | -0.57 | 0.03 | 0 | 0 | 0 | not significant |
| 5654 | GO_POSITIVE_REGULATION_OF_HEAT_GENERATION                           | -0.57 | 0.03 | 0 | 0 | 0 | not significant |
| 5655 | GO_PROTEIN_LOCALIZATION_TO_NON_MOTILE_CILIUM                        | -0.57 | 0.03 | 0 | 0 | 0 | not significant |
| 5656 | GO_REGULATION_OF_MDA_5_SIGNALING_PATHWAY                            | -0.57 | 0.03 | 0 | 0 | 0 | not significant |



|      |                                                                       |       |      |   |   |   |                 |
|------|-----------------------------------------------------------------------|-------|------|---|---|---|-----------------|
| 5657 | GO_VITAMIN_D_METABOLIC_PROCESS                                        | -0.57 | 0.03 | 0 | 0 | 0 | not significant |
| 5658 | KUWANO_RNA_STABILIZED_BY_NO                                           | -0.57 | 0.03 | 0 | 0 | 0 | not significant |
| 5659 | GO_MELANOCYTE_DIFFERENTIATION                                         | -0.57 | 0.02 | 0 | 0 | 0 | not significant |
| 5660 | GO_NEGATIVE_REGULATION_OF_SINGLE_STRANDED_VIRAL_RNA_REPLICATION_VI    | -0.57 | 0.02 | 0 | 0 | 0 | not significant |
| 5661 | GO_ORGANELLE_INHERITANCE                                              | -0.57 | 0.02 | 0 | 0 | 0 | not significant |
| 5662 | GO_REGULATION_OF_TRANSPPOSITION                                       | -0.57 | 0.02 | 0 | 0 | 0 | not significant |
| 5663 | GO_RESPONSE_TO_GRANULOCYTE_MACROPHAGE_COLONY_STIMULATING_FACTI        | -0.57 | 0.02 | 0 | 0 | 0 | not significant |
| 5664 | GO_REGULATION_OF_CARDIOCYTE_DIFFERENTIATION                           | -0.57 | 0.01 | 0 | 0 | 0 | not significant |
| 5665 | GO_RESPONSE_TO_ELECTRICAL_STIMULUS                                    | -0.57 | 0.01 | 0 | 0 | 0 | not significant |
| 5666 | KANG_CISPLATIN_RESISTANCE_UP                                          | -0.57 | 0.01 | 0 | 0 | 0 | not significant |
| 5667 | GO_REGULATION_OF_MEGAKARYOCYTE_DIFFERENTIATION                        | -0.57 | 0    | 0 | 0 | 0 | not significant |
| 5668 | GO_NURF_COMPLEX                                                       | -0.56 | 0.04 | 0 | 0 | 0 | not significant |
| 5669 | GO_POSITIVE_REGULATION_OF_KILLING_OF_CELLS_OF_OTHER_ORGANISM          | -0.56 | 0.03 | 0 | 0 | 0 | not significant |
| 5670 | GO_PYRIMIDINE_RIBONUCLEOSIDE_CATABOLIC_PROCESS                        | -0.56 | 0.03 | 0 | 0 | 0 | not significant |
| 5671 | REACTOME_P16P_REGULATES_TP53_ACETYLATION                              | -0.56 | 0.03 | 0 | 0 | 0 | not significant |
| 5672 | BIOCARTA_CTBP1_PATHWAY                                                | -0.56 | 0.02 | 0 | 0 | 0 | not significant |
| 5673 | GO_CALCIUM_TRANSPORTING_ATPASE_ACTIVITY                               | -0.56 | 0.02 | 0 | 0 | 0 | not significant |
| 5674 | GO_DEFINITIVE_HEMOPOIESIS                                             | -0.56 | 0.02 | 0 | 0 | 0 | not significant |
| 5675 | GO_HISTONE_DEMETHYLASE_ACTIVITY_H3_K36_SPECIFIC_                      | -0.56 | 0.02 | 0 | 0 | 0 | not significant |
| 5676 | KOBAYASHI_EGFR_SIGNALING_6HR_DN                                       | -0.56 | 0.02 | 0 | 0 | 0 | not significant |
| 5677 | REACTOME_DECTIN_2_FAMILY                                              | -0.56 | 0.02 | 0 | 0 | 0 | not significant |
| 5678 | REACTOME_RNF_MUTANTS_SHOW_ENHANCED_WNT_SIGNALING_AND_PROLIFERA'       | -0.56 | 0.02 | 0 | 0 | 0 | not significant |
| 5679 | GO_5_3_EXONUCLEASE_ACTIVITY                                           | -0.56 | 0.01 | 0 | 0 | 0 | not significant |
| 5680 | GO_GENETIC_IMPRINTING                                                 | -0.56 | 0.01 | 0 | 0 | 0 | not significant |
| 5681 | GO_MITOCHONDRIAL_CALCIUM_ION_HOMEOSTASIS                              | -0.56 | 0.01 | 0 | 0 | 0 | not significant |
| 5682 | GO_NEGATIVE_REGULATION_OF_SIGNAL_TRANSDUCTION_IN_ABSENCE_OF_LIGAN     | -0.56 | 0    | 0 | 0 | 0 | not significant |
| 5683 | GO_ZINC_ION_HOMEOSTASIS                                               | -0.56 | 0    | 0 | 0 | 0 | not significant |
| 5684 | GO_FIBROBLAST_GROWTH_FACTOR_PRODUCTION                                | -0.55 | 0.03 | 0 | 0 | 0 | not significant |
| 5685 | GO_POSITIVE_REGULATION_OF_ACTIN_FILAMENT_DEPOLYMERIZATION             | -0.55 | 0.03 | 0 | 0 | 0 | not significant |
| 5686 | GO_PURINE_RIBONUCLEOSIDE_SALVAGE                                      | -0.55 | 0.03 | 0 | 0 | 0 | not significant |
| 5687 | GO_UBIQUITIN_DEPENDENT_ENDOCYTOSIS                                    | -0.55 | 0.03 | 0 | 0 | 0 | not significant |
| 5688 | PLASARIN_FIC_TARGETS_BASAL_UP                                         | -0.55 | 0.03 | 0 | 0 | 0 | not significant |
| 5689 | ALONSO_METASTASIS_NEURAL_UP                                           | -0.55 | 0.02 | 0 | 0 | 0 | not significant |
| 5690 | BIOCARTA_SAM68_PATHWAY                                                | -0.55 | 0.02 | 0 | 0 | 0 | not significant |
| 5691 | GO_CELLULAR_RESPONSE_TO_COLD                                          | -0.55 | 0.02 | 0 | 0 | 0 | not significant |
| 5692 | GO_NEGATIVE_REGULATION_OF_PEPTIDYL_CYSSTEINE_S_NITROSYLATION          | -0.55 | 0.02 | 0 | 0 | 0 | not significant |
| 5693 | GO_NUCLEAR_POLYADENYLATION_DEPENDENT_TRNA_CATABOLIC_PROCESS           | -0.55 | 0.02 | 0 | 0 | 0 | not significant |
| 5694 | GO_PROTEASOME_CORE_COMPLEX_BETA_SUBUNIT_COMPLEX                       | -0.55 | 0.02 | 0 | 0 | 0 | not significant |
| 5695 | ANDERSEN_CHOLANGIOCARCINOMA_CLASS1                                    | -0.55 | 0.01 | 0 | 0 | 0 | not significant |
| 5696 | FINETTI_BREAST_CANCER_KINOME_GREEN                                    | -0.55 | 0.01 | 0 | 0 | 0 | not significant |
| 5697 | GO_GABA_ERGIC_SYNAPSE                                                 | -0.55 | 0.01 | 0 | 0 | 0 | not significant |
| 5698 | GO_REGULATION_OF_ACTIN_NUCLEATION                                     | -0.55 | 0.01 | 0 | 0 | 0 | not significant |
| 5699 | GO_CELLULAR_METABOLIC_COMPOUND_SALVAGE                                | -0.55 | 0    | 0 | 0 | 0 | not significant |
| 5700 | GO_PHOSPHATIDYLINOSITOL_BISPHOSPHATE_PHOSPHATASE_ACTIVITY             | -0.55 | 0    | 0 | 0 | 0 | not significant |
| 5701 | GO_REGULATION_OF_PEPTIDYL_CYSSTEINE_S_NITROSYLATION                   | -0.54 | 0.03 | 0 | 0 | 0 | not significant |
| 5702 | REACTOME_SODIUM_PROTON_EXCHANGERS                                     | -0.54 | 0.03 | 0 | 0 | 0 | not significant |
| 5703 | GO_CAMP_DEPENDENT_PROTEIN_KINASE_INHIBITOR_ACTIVITY                   | -0.54 | 0.02 | 0 | 0 | 0 | not significant |
| 5704 | GO_CRANIAL_NERVE_MORPHOGENESIS                                        | -0.54 | 0.02 | 0 | 0 | 0 | not significant |
| 5705 | GO_DNA_METHYLATION_INVOLVED_IN_GAMETE_GENERATION                      | -0.54 | 0.02 | 0 | 0 | 0 | not significant |
| 5706 | GO_POSITIVE_REGULATION_OF_LYASE_ACTIVITY                              | -0.54 | 0.02 | 0 | 0 | 0 | not significant |
| 5707 | GO_TOOTH_MINERALIZATION                                               | -0.54 | 0.02 | 0 | 0 | 0 | not significant |
| 5708 | SHI_SPARC_TARGETS_DN                                                  | -0.54 | 0.02 | 0 | 0 | 0 | not significant |
| 5709 | TERAMOTO_OPN_TARGETS_CLUSTER_3                                        | -0.54 | 0.02 | 0 | 0 | 0 | not significant |
| 5710 | GO_EXTRACELLULAR_VESICLE_BIOGENESIS                                   | -0.54 | 0.01 | 0 | 0 | 0 | not significant |
| 5711 | GO_NEGATIVE_REGULATION_OF_INTERLEUKIN_8_SECRETION                     | -0.54 | 0.01 | 0 | 0 | 0 | not significant |
| 5712 | REACTOME_BETA_OXIDATION_OF_DECANOYL_COA_TO_OCTANOYL_COA_COA           | -0.54 | 0.01 | 0 | 0 | 0 | not significant |
| 5713 | GO_PEROXISOME_ORGANIZATION                                            | -0.54 | 0    | 0 | 0 | 0 | not significant |
| 5714 | GO_XENOBIOTIC_CATABOLIC_PROCESS                                       | -0.53 | 0.03 | 0 | 0 | 0 | not significant |
| 5715 | CHR3Q24                                                               | -0.53 | 0.02 | 0 | 0 | 0 | not significant |
| 5716 | GO_NEGATIVE_REGULATION_OF_GLIAL_CELL_DIFFERENTIATION                  | -0.53 | 0.02 | 0 | 0 | 0 | not significant |
| 5717 | GO_POSITIVE_REGULATION_OF_ADENYLATE_CYCLASE_ACTIVITY                  | -0.53 | 0.02 | 0 | 0 | 0 | not significant |
| 5718 | GO_REGULATION_OF_EXOSOMAL_SECRETION                                   | -0.53 | 0.02 | 0 | 0 | 0 | not significant |
| 5719 | HUMMERICH_BENIGN_SKIN_TUMOR_UP                                        | -0.53 | 0.02 | 0 | 0 | 0 | not significant |
| 5720 | MEISSNER_BRAIN_HCP_WITH_H3K4ME2                                       | -0.53 | 0.02 | 0 | 0 | 0 | not significant |
| 5721 | REACTOME_EICOSANOID_LIGAND_BINDING_RECEPTORS                          | -0.53 | 0.02 | 0 | 0 | 0 | not significant |
| 5722 | REACTOME_RUNK3_REGULATES_BCL2L11_BIM_TRANSCRIPTION                    | -0.53 | 0.02 | 0 | 0 | 0 | not significant |
| 5723 | GO_HEART_FORMATION                                                    | -0.53 | 0.01 | 0 | 0 | 0 | not significant |
| 5724 | GO_MEMBRANE_REPOLARIZATION                                            | -0.53 | 0.01 | 0 | 0 | 0 | not significant |
| 5725 | GO_METHIONINE_BIOSYNTHETIC_PROCESS                                    | -0.52 | 0.02 | 0 | 0 | 0 | not significant |
| 5726 | GO_POSITIVE_REGULATION_OF_PROTEIN_GLYCOSYLATION                       | -0.52 | 0.02 | 0 | 0 | 0 | not significant |
| 5727 | HANSON_HRAS_SIGNALING_VIA_NFKB                                        | -0.52 | 0.02 | 0 | 0 | 0 | not significant |
| 5728 | WHITESIDE_CISPLATIN_RESISTANCE_UP                                     | -0.52 | 0.02 | 0 | 0 | 0 | not significant |
| 5729 | CHR8Q12                                                               | -0.52 | 0.01 | 0 | 0 | 0 | not significant |
| 5730 | GO_CAMP_DEPENDENT_PROTEIN_KINASE_REGULATOR_ACTIVITY                   | -0.52 | 0.01 | 0 | 0 | 0 | not significant |
| 5731 | GO_INHIBITORY_POSTSYNAPTIC_POTENTIAL                                  | -0.52 | 0.01 | 0 | 0 | 0 | not significant |
| 5732 | NABA_PROTEOGLYCANS                                                    | -0.52 | 0.01 | 0 | 0 | 0 | not significant |
| 5733 | CHR2P21                                                               | -0.52 | 0    | 0 | 0 | 0 | not significant |
| 5734 | GO_REGULATION_OF_COENZYME_METABOLIC_PROCESS                           | -0.52 | 0    | 0 | 0 | 0 | not significant |
| 5735 | REACTOME_ACTIVATED_PKN1_STIMULATES_TRANSCRIPTION_OF_AR_ANDROGEN       | -0.52 | 0    | 0 | 0 | 0 | not significant |
| 5736 | GO_1_PHOSPHATIDYLINOSITOL_4_PHOSPHATE_5_KINASE_ACTIVITY               | -0.51 | 0.01 | 0 | 0 | 0 | not significant |
| 5737 | GO_CHAPERONE_MEDIATED_PROTEIN_TRANSPORT                               | -0.51 | 0.01 | 0 | 0 | 0 | not significant |
| 5738 | GO_NEGATIVE_REGULATION_OF_ADENYLATE_CYCLASE_ACTIVITY                  | -0.51 | 0.01 | 0 | 0 | 0 | not significant |
| 5739 | GO_NEGATIVE_REGULATION_OF_PROTEIN_LOCALIZATION_TO_CELL_SURFACE        | -0.51 | 0.01 | 0 | 0 | 0 | not significant |
| 5740 | GO_POSITIVE_REGULATION_OF_ACTIN_NUCLEATION                            | -0.51 | 0.01 | 0 | 0 | 0 | not significant |
| 5741 | GO_PYRIMIDINE_NUCLEOSIDE_BIOSYNTHETIC_PROCESS                         | -0.51 | 0.01 | 0 | 0 | 0 | not significant |
| 5742 | GO_REGULATION_OF_ACYL_COA_BIOSYNTHETIC_PROCESS                        | -0.51 | 0.01 | 0 | 0 | 0 | not significant |
| 5743 | GO_REGULATION_OF_MITOCHONDRIAL_FUSION                                 | -0.51 | 0.01 | 0 | 0 | 0 | not significant |
| 5744 | GO_RIBONUCLEOSIDE_CATABOLIC_PROCESS                                   | -0.51 | 0.01 | 0 | 0 | 0 | not significant |
| 5745 | PARK_TRETINOIN_RESPONSE                                               | -0.51 | 0.01 | 0 | 0 | 0 | not significant |
| 5746 | REACTOME_SEMA3A_PLEXIN_REPULSION_SIGNALING_BY_INHIBITING_INTEGRIN_ADI | -0.51 | 0.01 | 0 | 0 | 0 | not significant |
| 5747 | RODRIGUES_NTN1_TARGETS_UP                                             | -0.51 | 0.01 | 0 | 0 | 0 | not significant |
| 5748 | GO_POSITIVE_REGULATION_OF_SIGNALING_RECEPTOR_ACTIVITY                 | -0.51 | 0    | 0 | 0 | 0 | not significant |
| 5749 | GO_REGULATION_OF_EXTRINSIC_APOPTOTIC_SIGNALING_PATHWAY_IN_ABSENCE     | -0.51 | 0    | 0 | 0 | 0 | not significant |
| 5750 | NAKAYAMA_SOFT_TISSUE_TUMORS_PCA2_DN                                   | -0.51 | 0    | 0 | 0 | 0 | not significant |
| 5751 | REACTOME_DNA_METHYLATION                                              | -0.51 | 0    | 0 | 0 | 0 | not significant |
| 5752 | GO_ADENOSINE_TO_INOSINE_EDITING                                       | -0.50 | 0.01 | 0 | 0 | 0 | not significant |
| 5753 | GO_RENAL_ABSORPTION                                                   | -0.50 | 0.01 | 0 | 0 | 0 | not significant |
| 5754 | GO_VITAMIN_CATABOLIC_PROCESS                                          | -0.50 | 0.01 | 0 | 0 | 0 | not significant |
| 5755 | ZHAN_MULTIPLE_MYELOMA_DN                                              | -0.50 | 0    | 0 | 0 | 0 | not significant |
| 5756 | BIOCARTA_HES_PATHWAY                                                  | -0.49 | 0.01 | 0 | 0 | 0 | not significant |
| 5757 | GO_BH_DOMAIN_BINDING                                                  | -0.49 | 0.01 | 0 | 0 | 0 | not significant |
| 5758 | GO_HOMOCYSTEINE_METABOLIC_PROCESS                                     | -0.49 | 0.01 | 0 | 0 | 0 | not significant |
| 5759 | GO_PYRIMIDINE_NUCLEOTIDE_SALVAGE                                      | -0.49 | 0.01 | 0 | 0 | 0 | not significant |
| 5760 | GO_REGULATION_OF_KERATINOCYTE_PROLIFERATION                           | -0.49 | 0.01 | 0 | 0 | 0 | not significant |
| 5761 | HALLMARK_COAGULATION                                                  | -0.49 | 0    | 0 | 0 | 0 | not significant |
| 5762 | GO_VINCULIN_BINDING                                                   | -0.48 | 0.01 | 0 | 0 | 0 | not significant |
| 5763 | GO_G_PROTEIN_COUPLED_PURINERGIC_RECEPTOR_SIGNALING_PATHWAY            | -0.48 | 0    | 0 | 0 | 0 | not significant |
| 5764 | GO_PHOSPHATIDYLINOSITOL_PHOSPHATE_KINASE_ACTIVITY                     | -0.48 | 0    | 0 | 0 | 0 | not significant |
| 5765 | GO_HISTAMINE_TRANSPORT                                                | -0.47 | 0.01 | 0 | 0 | 0 | not significant |

|      |                                                                    |       |      |   |   |   |                 |
|------|--------------------------------------------------------------------|-------|------|---|---|---|-----------------|
| 5766 | GO_STRESS_INDUCED_PREMATURE_SENESCENCE                             | -0.47 | 0.01 | 0 | 0 | 0 | not significant |
| 5767 | BIOCARTA_CYTOKINE_PATHWAY                                          | -0.47 | 0    | 0 | 0 | 0 | not significant |
| 5768 | IZUKA_LIVER_CANCER_PROGRESSION_G2_G3_UP                            | -0.47 | 0    | 0 | 0 | 0 | not significant |
| 5769 | KEGG_STEROID_HORMONE_BIOSYNTHESIS                                  | -0.47 | 0    | 0 | 0 | 0 | not significant |
| 5770 | GO_ADP_RIBOSYLATION_FACTOR_BINDING                                 | -0.46 | 0.01 | 0 | 0 | 0 | not significant |
| 5771 | GO_NEUROPEPTIDE_RECEPTOR_ACTIVITY                                  | -0.46 | 0.01 | 0 | 0 | 0 | not significant |
| 5772 | GO_PRIMITIVE_HEMOPOIESIS                                           | -0.46 | 0.01 | 0 | 0 | 0 | not significant |
| 5773 | GO_BLOOD_VESSEL_ENDOTHELIAL_CELL_DIFFERENTIATION                   | -0.46 | 0    | 0 | 0 | 0 | not significant |
| 5774 | GO_CD4_RECEPTOR_BINDING                                            | -0.46 | 0    | 0 | 0 | 0 | not significant |
| 5775 | GO_DIGESTIVE_TRACT_MORPHOGENESIS                                   | -0.46 | 0    | 0 | 0 | 0 | not significant |
| 5776 | GO_INTRAACILIARY_TRANSPORT_PARTICLE_B                              | -0.46 | 0    | 0 | 0 | 0 | not significant |
| 5777 | GO_L_ASCORBIC_ACID_METABOLIC_PROCESS                               | -0.46 | 0    | 0 | 0 | 0 | not significant |
| 5778 | BOYALULT_LIVER_CANCER_SUBCLASS_G12_DN                              | -0.45 | 0    | 0 | 0 | 0 | not significant |
| 5779 | CHAN_INTERFERON_PRODUCING_DENDRITIC_CELL                           | -0.45 | 0    | 0 | 0 | 0 | not significant |
| 5780 | GO_OXYGEN_BINDING                                                  | -0.45 | 0    | 0 | 0 | 0 | not significant |
| 5781 | GO_PROTON_EXPORTING_ATPASE_ACTIVITY_PHOSPHORYLATIVE_MECHANISM      | -0.45 | 0    | 0 | 0 | 0 | not significant |
| 5782 | GO_RENAL_SODIUM_ION_TRANSPORT                                      | -0.45 | 0    | 0 | 0 | 0 | not significant |
| 5783 | GO_ADENOSINE_RECEPTOR_SIGNALING_PATHWAY                            | -0.44 | 0.01 | 0 | 0 | 0 | not significant |
| 5784 | GO_DNA_PROTECTION                                                  | -0.44 | 0.01 | 0 | 0 | 0 | not significant |
| 5785 | GO_VESICLE_FUSION_WITH_ENDOPLASMIC_RETICULUM_GOLGI_INTERMEDIATE_CC | -0.44 | 0.01 | 0 | 0 | 0 | not significant |
| 5786 | GO_NEGATIVE_REGULATION_OF_MITOCHONDRIAL_FUSION                     | -0.44 | 0    | 0 | 0 | 0 | not significant |
| 5787 | GO_NEGATIVE_REGULATION_OF_VASCULAR_ENDOTHELIAL_GROWTH_FACTOR_RI    | -0.44 | 0    | 0 | 0 | 0 | not significant |
| 5788 | GO_POSITIVE_REGULATION_OF_T_CELL_DIFFERENTIATION_IN_THYMUS         | -0.44 | 0    | 0 | 0 | 0 | not significant |
| 5789 | TUOMISTO_TUMOR_SUPPRESSION_BY_COL13A1_UP                           | -0.43 | 0.01 | 0 | 0 | 0 | not significant |
| 5790 | GO_REGULATION_OF_CALCIIUM_ION_IMPORT                               | -0.43 | 0    | 0 | 0 | 0 | not significant |
| 5791 | GO_REGULATION_OF_REMOVAL_OF_SUPEROXIDE_RADICALS                    | -0.43 | 0    | 0 | 0 | 0 | not significant |
| 5792 | GO_BETA_2_ADRENERGIC_RECEPTOR_BINDING                              | -0.42 | 0    | 0 | 0 | 0 | not significant |
| 5793 | REACTOME_TICAM1_DEPENDENT_ACTIVATION_OF_IRF3_IRF7                  | -0.42 | 0    | 0 | 0 | 0 | not significant |
| 5794 | GO_DYNEIN_LIGHT_CHAIN_BINDING                                      | -0.41 | 0    | 0 | 0 | 0 | not significant |
| 5795 | KUROKAWA_LIVER_CANCER_EARLY_RECURRENCE_UP                          | -0.41 | 0    | 0 | 0 | 0 | not significant |
| 5796 | GO_BLOC_1_COMPLEX                                                  | -0.40 | 0    | 0 | 0 | 0 | not significant |
| 5797 | GO_MEMBRANE_RAFT_ASSEMBLY                                          | -0.40 | 0    | 0 | 0 | 0 | not significant |
| 5798 | GO_REGULATION_OF_LYASE_ACTIVITY                                    | -0.40 | 0    | 0 | 0 | 0 | not significant |
| 5799 | GO_MUCOPOLYSACCHARIDE_METABOLIC_PROCESS                            | -0.39 | 0    | 0 | 0 | 0 | not significant |
| 5800 | GO_PARAXIAL_MESODERM_DEVELOPMENT                                   | -0.39 | 0    | 0 | 0 | 0 | not significant |
| 5801 | GO_ENDOPLASMIC_RETICULUM_LOCALIZATION                              | -0.37 | 0    | 0 | 0 | 0 | not significant |
| 5802 | GO_CALCINEURIN_COMPLEX                                             | -0.34 | 0    | 0 | 0 | 0 | not significant |
| 5803 | GO_NEURAL_RETINA_DEVELOPMENT                                       | 0.33  | 0    | 0 | 0 | 0 | not significant |
| 5804 | GO_CHEMOSENSORY_BEHAVIOR                                           | 0.37  | 0    | 0 | 0 | 0 | not significant |
| 5805 | GO_COENZYME_A_BIOSYNTHETIC_PROCESS                                 | 0.37  | 0    | 0 | 0 | 0 | not significant |
| 5806 | PID_RHODOPSIN_PATHWAY                                              | 0.37  | 0    | 0 | 0 | 0 | not significant |
| 5807 | CHR11P14                                                           | 0.38  | 0    | 0 | 0 | 0 | not significant |
| 5808 | GO_FACIAL_NERVE_MORPHOGENESIS                                      | 0.38  | 0    | 0 | 0 | 0 | not significant |
| 5809 | GO_N_ACETYLGUCOSAMINE_METABOLIC_PROCESS                            | 0.38  | 0    | 0 | 0 | 0 | not significant |
| 5810 | GO_POSITIVE_REGULATION_OF_Glutamate_SECRETION                      | 0.38  | 0    | 0 | 0 | 0 | not significant |
| 5811 | GO_REGULATION_OF_Glutamate_SECRETION                               | 0.38  | 0    | 0 | 0 | 0 | not significant |
| 5812 | GO_GLYCINE_BINDING                                                 | 0.39  | 0    | 0 | 0 | 0 | not significant |
| 5813 | GO_REGULATION_OF_HISTONE_H3_K9_TRIMETHYLATION                      | 0.39  | 0    | 0 | 0 | 0 | not significant |
| 5814 | GO_S_ADENOSYLMETHIONINE_METABOLIC_PROCESS                          | 0.39  | 0    | 0 | 0 | 0 | not significant |
| 5815 | GO_UV_PROTECTION                                                   | 0.39  | 0    | 0 | 0 | 0 | not significant |
| 5816 | REACTOME_BETA_OXIDATION_OF_OCTANOYL_COA_TO_HEXANOYL_COA            | 0.39  | 0    | 0 | 0 | 0 | not significant |
| 5817 | GO_LIPOPOLYSACCHARIDE_BINDING                                      | 0.40  | 0    | 0 | 0 | 0 | not significant |
| 5818 | REACTOME_NOTCH4_INTRACELLULAR_DOMAIN_REGULATES_TRANSCRIPTION       | 0.40  | 0    | 0 | 0 | 0 | not significant |
| 5819 | CHR4P11                                                            | 0.41  | 0    | 0 | 0 | 0 | not significant |
| 5820 | GO_DICHOTOMOUS_SUBDIVISION_OF_AN_EPITHELIAL_TERMINAL_UNIT          | 0.41  | 0    | 0 | 0 | 0 | not significant |
| 5821 | GO_PARASYMPATHETIC_NERVOUS_SYSTEM_DEVELOPMENT                      | 0.41  | 0    | 0 | 0 | 0 | not significant |
| 5822 | REACTOME_NOTCH2_INTRACELLULAR_DOMAIN_REGULATES_TRANSCRIPTION       | 0.41  | 0    | 0 | 0 | 0 | not significant |
| 5823 | GO_COA_HYDROLASE_ACTIVITY                                          | 0.42  | 0    | 0 | 0 | 0 | not significant |
| 5824 | GO_H3_HISTONE_ACETYLTRANSFERASE_COMPLEX                            | 0.42  | 0    | 0 | 0 | 0 | not significant |
| 5825 | GO_MORPHOGENESIS_OF_AN_ENDOTHELIUM                                 | 0.42  | 0    | 0 | 0 | 0 | not significant |
| 5826 | HASLINGER_B_CLL_WITH_6Q21_DELETION                                 | 0.42  | 0    | 0 | 0 | 0 | not significant |
| 5827 | REACTOME_GLYCEROPHOSPHOLIPID_CATABOLISM                            | 0.42  | 0    | 0 | 0 | 0 | not significant |
| 5828 | GO_REGULATION_OF_KILLING_OF_CELLS_OF_OTHER_ORGANISM                | 0.43  | 0.01 | 0 | 0 | 0 | not significant |
| 5829 | GO_REGULATION_OF_WNT_SIGNALING_PATHWAY_PLANAR_CELL_POLARITY_PATH   | 0.43  | 0.01 | 0 | 0 | 0 | not significant |
| 5830 | GO_SPHINGOID_BIOSYNTHETIC_PROCESS                                  | 0.43  | 0.01 | 0 | 0 | 0 | not significant |
| 5831 | GO_OXIDOREDUCTASE_ACTIVITY_ACTING_ON_NAD_P_H_HEME_PROTEIN_AS_ACCI  | 0.43  | 0    | 0 | 0 | 0 | not significant |
| 5832 | GO_PROTEIN_IMPORT_INTO_PEROXISOME_MEMBRANE                         | 0.43  | 0    | 0 | 0 | 0 | not significant |
| 5833 | KEGG_PANTOTHENATE_AND_COA_BIOSYNTHESIS                             | 0.43  | 0    | 0 | 0 | 0 | not significant |
| 5834 | SUMI_HNF4A_TARGETS                                                 | 0.43  | 0    | 0 | 0 | 0 | not significant |
| 5835 | GO_CARBOANATE_DEHYDRATASE_ACTIVITY                                 | 0.44  | 0.01 | 0 | 0 | 0 | not significant |
| 5836 | GO_NEURAL_PLATE_PATTERN_SPECIFICATION                              | 0.44  | 0.01 | 0 | 0 | 0 | not significant |
| 5837 | GO_OLIGOSACCHARIDE_BIOSYNTHETIC_PROCESS                            | 0.44  | 0.01 | 0 | 0 | 0 | not significant |
| 5838 | GO_ATPASE_ACTIVITY_COUPLED_TO_TRANSMEMBRANE_MOVEMENT_OF_IONS_PT    | 0.44  | 0    | 0 | 0 | 0 | not significant |
| 5839 | GO_MYELIN_MAINTENANCE                                              | 0.45  | 0.01 | 0 | 0 | 0 | not significant |
| 5840 | HUMMERICH_MALIGNANT_SKIN_TUMOR_UP                                  | 0.45  | 0.01 | 0 | 0 | 0 | not significant |
| 5841 | KRAS50_UP.V1_UP                                                    | 0.45  | 0.01 | 0 | 0 | 0 | not significant |
| 5842 | EBAUER_MYOGENIC_TARGETS_OF_PAX3_FOXP1_FUSION                       | 0.45  | 0    | 0 | 0 | 0 | not significant |
| 5843 | GO_BETA_CATENIN_TCF_COMPLEX                                        | 0.45  | 0    | 0 | 0 | 0 | not significant |
| 5844 | L1_PROSTATE_CANCER_EPIGENETIC                                      | 0.45  | 0    | 0 | 0 | 0 | not significant |
| 5845 | REACTOME_VITAMIN_C_ASCORBATE_METABOLISM                            | 0.45  | 0    | 0 | 0 | 0 | not significant |
| 5846 | YANG_BREAST_CANCER_ESR1_DN                                         | 0.45  | 0    | 0 | 0 | 0 | not significant |
| 5847 | GO_RAC_GUANYL_NUCLEOTIDE_EXCHANGE_FACTOR_ACTIVITY                  | 0.46  | 0.01 | 0 | 0 | 0 | not significant |
| 5848 | GO_DETERMINATION_OF_DORSAL_VENTRAL_ASYMMETRY                       | 0.46  | 0    | 0 | 0 | 0 | not significant |
| 5849 | SA_TRKA_RECEPTOR                                                   | 0.46  | 0    | 0 | 0 | 0 | not significant |
| 5850 | BIOCARTA_SUMO_PATHWAY                                              | 0.47  | 0.01 | 0 | 0 | 0 | not significant |
| 5851 | GO_BRANCHING_INVOLVED_IN_SALIVARY_GLAND_MORPHOGENESIS              | 0.47  | 0.01 | 0 | 0 | 0 | not significant |
| 5852 | GO_ESTROGEN_METABOLIC_PROCESS                                      | 0.47  | 0.01 | 0 | 0 | 0 | not significant |
| 5853 | GO_LIPOPROTEIN_METABOLIC_PROCESS                                   | 0.47  | 0.01 | 0 | 0 | 0 | not significant |
| 5854 | GO_POLYPEPTIDE_N_ACETYLGALACTOSAMINYLTRANSFERASE_ACTIVITY          | 0.47  | 0.01 | 0 | 0 | 0 | not significant |
| 5855 | GO_POTASSIUM_CHANNEL_INHIBITOR_ACTIVITY                            | 0.47  | 0.01 | 0 | 0 | 0 | not significant |
| 5856 | IGLESIAS_E2F_TARGETS_DN                                            | 0.47  | 0.01 | 0 | 0 | 0 | not significant |
| 5857 | REACTOME DISSOLUTION_OF_FIBRIN_CLOT                                | 0.47  | 0.01 | 0 | 0 | 0 | not significant |
| 5858 | VERNOCHET_ADIPOGENESIS                                             | 0.47  | 0.01 | 0 | 0 | 0 | not significant |
| 5859 | CHR3Q12                                                            | 0.47  | 0    | 0 | 0 | 0 | not significant |
| 5860 | GO_EMBRYONIC_DIGIT_MORPHOGENESIS                                   | 0.47  | 0    | 0 | 0 | 0 | not significant |
| 5861 | GO_EMBRYONIC_EYE_MORPHOGENESIS                                     | 0.47  | 0    | 0 | 0 | 0 | not significant |
| 5862 | GO_REGULATION_OF_CYCLASE_ACTIVITY                                  | 0.47  | 0    | 0 | 0 | 0 | not significant |
| 5863 | TORCHIA_TARGETS_OF_EWSR1_FL11_FUSION_TOP20_UP                      | 0.47  | 0    | 0 | 0 | 0 | not significant |
| 5864 | GO_ACTIN_FILAMENT_BASED_TRANSPORT                                  | 0.48  | 0.01 | 0 | 0 | 0 | not significant |
| 5865 | GO_CELLULAR_SODIUM_ION_HOMEOSTASIS                                 | 0.48  | 0.01 | 0 | 0 | 0 | not significant |
| 5866 | GO_POSITIVE_REGULATION_OF_HEART_CONTRACTION                        | 0.48  | 0.01 | 0 | 0 | 0 | not significant |
| 5867 | GO_POTASSIUM_ION_ANTIPORTER_ACTIVITY                               | 0.48  | 0.01 | 0 | 0 | 0 | not significant |
| 5868 | GO_REGULATION_OF_HEART_MORPHOGENESIS                               | 0.48  | 0.01 | 0 | 0 | 0 | not significant |
| 5869 | GO_REGULATION_OF_LYMPHOID_PROGENITOR_CELL_DIFFERENTIATION          | 0.48  | 0.01 | 0 | 0 | 0 | not significant |
| 5870 | GO_SODIUM_ION_EXPORT_ACROSS_PLASMA_MEMBRANE                        | 0.48  | 0.01 | 0 | 0 | 0 | not significant |
| 5871 | CHEOK_RESPONSE_TO_MERCAPTOPURINE_AND_LD_MTX_UP                     | 0.49  | 0.01 | 0 | 0 | 0 | not significant |
| 5872 | GO DETECTION OF MECHANICAL STIMULUS INVOLVED IN SENSORY PERCEPTIO  | 0.49  | 0.01 | 0 | 0 | 0 | not significant |
| 5873 | GO_FILOPODIUM_MEMBRANE                                             | 0.49  | 0.01 | 0 | 0 | 0 | not significant |
| 5874 | GO_POSITIVE_REGULATION_OF_TRANSCRIPTION_FROM_RNA_POLYMERASE_II_PR  | 0.49  | 0.01 | 0 | 0 | 0 | not significant |

|      |                                                                    |      |      |   |   |   |                 |
|------|--------------------------------------------------------------------|------|------|---|---|---|-----------------|
| 5875 | KEGG_HISTIDINE_METABOLISM                                          | 0.49 | 0.01 | 0 | 0 | 0 | not significant |
| 5876 | REACTOME_SUMO_IS_CONJUGATED_TO_E1_UBA2:SAE1                        | 0.49 | 0.01 | 0 | 0 | 0 | not significant |
| 5877 | BAUS_TFF2_TARGETS_UP                                               | 0    | 0    | 0 | 0 | 0 | not significant |
| 5878 | GO_PIGMENT_GRANULE_ORGANIZATION                                    | 0.49 | 0    | 0 | 0 | 0 | not significant |
| 5879 | GO_ZINC_ION_TRANSPORT                                              | 0    | 0    | 0 | 0 | 0 | not significant |
| 5880 | GO_CELLULAR_RESPONSE_TO_ALDEHYDE                                   | 0.50 | 0.02 | 0 | 0 | 0 | not significant |
| 5881 | GO_NUCLEOSIDE_TRIPHOSPHATE_CATABOLIC_PROCESS                       | 0.50 | 0.02 | 0 | 0 | 0 | not significant |
| 5882 | GO_PURINE_NUCLEOSIDE_CATABOLIC_PROCESS                             | 0.50 | 0.02 | 0 | 0 | 0 | not significant |
| 5883 | GO_CALMODULIN_DEPENDENT_PROTEIN_PHOSPHATASE_ACTIVITY               | 0.50 | 0.01 | 0 | 0 | 0 | not significant |
| 5884 | GO_CELLULAR_RESPONSE_TO_ZINC_ION                                   | 0.50 | 0    | 0 | 0 | 0 | not significant |
| 5885 | GO_POSITIVE_REGULATION_OF_CYCLASE_ACTIVITY                         | 0.50 | 0.01 | 0 | 0 | 0 | not significant |
| 5886 | GO_PROTEIN_BINDING_BRIDGING_INVOLVED_IN_SUBSTRATE_RECOGNITION_FOR  | 0.50 | 0.01 | 0 | 0 | 0 | not significant |
| 5887 | GO_INTRAELIUM_TRANSPORT_PARTICLE                                   | 0.50 | 0    | 0 | 0 | 0 | not significant |
| 5888 | DEBOSSCHER_NFKB_TARGETS_REPRESSED_BY_GLUCCORTICOID                 | 0.51 | 0.02 | 0 | 0 | 0 | not significant |
| 5889 | GO_CATION_TRANSPORTING_ATPASE_COMPLEX                              | 0.51 | 0.02 | 0 | 0 | 0 | not significant |
| 5890 | GO_MITOCHONDRIAL_DNA_REPAIR                                        | 0.51 | 0.02 | 0 | 0 | 0 | not significant |
| 5891 | GO_PROTEIN_GERANYLGERANYLTRANSFERASE_ACTIVITY                      | 0.51 | 0.02 | 0 | 0 | 0 | not significant |
| 5892 | GO_REGULATION_OF_CELL_CELL_ADHESION_MEDIATED_BY_CADHERIN           | 0.51 | 0.02 | 0 | 0 | 0 | not significant |
| 5893 | GO_REPLICATIVE_CELL_AGING                                          | 0.51 | 0.02 | 0 | 0 | 0 | not significant |
| 5894 | GO_SODIUM_ION_BINDING                                              | 0.51 | 0.02 | 0 | 0 | 0 | not significant |
| 5895 | PIEPOLI_LGI1_TARGETS_UP                                            | 0.51 | 0.02 | 0 | 0 | 0 | not significant |
| 5896 | DUNNE_TARGETS_OF_AML1_MTG8_FUSION_DN                               | 0.51 | 0.01 | 0 | 0 | 0 | not significant |
| 5897 | GO_CAMP_BINDING                                                    | 0.51 | 0.01 | 0 | 0 | 0 | not significant |
| 5898 | GO_NADPLUS_BINDING                                                 | 0.51 | 0.01 | 0 | 0 | 0 | not significant |
| 5899 | OZANNE_AP1_TARGETS_UP                                              | 0.51 | 0.01 | 0 | 0 | 0 | not significant |
| 5900 | REACTOME_BH3_ONLY_PROTEINS_ASSOCIATE_WITH_AND_INACTIVATE_ANTI_APO1 | 0.51 | 0.01 | 0 | 0 | 0 | not significant |
| 5901 | REACTOME_CRMP5_IN_SEMA3A_SIGNALING                                 | 0.51 | 0.01 | 0 | 0 | 0 | not significant |
| 5902 | REACTOME_PEROXISOMAL_LIPID_METABOLISM                              | 0.51 | 0.01 | 0 | 0 | 0 | not significant |
| 5903 | REACTOME_REGULATION_OF_TP53_ACTIVITY_THROUGH_ASSOCIATION_WITH_CO   | 0.51 | 0.01 | 0 | 0 | 0 | not significant |
| 5904 | GO_PYRIMIDINE_NUCLEOSIDE_MONOPHOSPHATE_BIOSYNTHETIC_PROCESS        | 0.51 | 0    | 0 | 0 | 0 | not significant |
| 5905 | GRADE_COLON_CANCER_DN                                              | 0.51 | 0    | 0 | 0 | 0 | not significant |
| 5906 | GO_LENS_MORPHOGENESIS_IN_CAMERA_TYPE_EYE                           | 0.52 | 0.02 | 0 | 0 | 0 | not significant |
| 5907 | GO_PERIPHERAL_NERVOUS_SYSTEM_MYELIN_MAINTENANCE                    | 0.52 | 0.02 | 0 | 0 | 0 | not significant |
| 5908 | GO_POSITIVE_REGULATION_OF_VACUOLE_ORGANIZATION                     | 0.52 | 0.02 | 0 | 0 | 0 | not significant |
| 5909 | GO_PROTEIN_GERANYLGERANYLATION                                     | 0.52 | 0.02 | 0 | 0 | 0 | not significant |
| 5910 | GO_RELAXATION_OF_SMOOTH_MUSCLE                                     | 0.52 | 0.02 | 0 | 0 | 0 | not significant |
| 5911 | GO_POSITIVE_REGULATION_OF_HISTONE_H3_K4_METHYLATION                | 0.52 | 0.01 | 0 | 0 | 0 | not significant |
| 5912 | GO_SERINE_TYPE_EXOPEPTIDASE_ACTIVITY                               | 0.52 | 0.01 | 0 | 0 | 0 | not significant |
| 5913 | REACTOME_MOLECULES_ASSOCIATED_WITH_ELASTIC_FIBRES                  | 0.52 | 0.01 | 0 | 0 | 0 | not significant |
| 5914 | REACTOME_PENTOSE_PHOSPHATE_PATHWAY                                 | 0.52 | 0.01 | 0 | 0 | 0 | not significant |
| 5915 | GO_ESTABLISHMENT_OF_EPITHELIAL_CELL_POLARITY                       | 0.52 | 0    | 0 | 0 | 0 | not significant |
| 5916 | PICCALUGA_ANGIOIMMUNOBLASTIC_LYMPHOMA_UP                           | 0.52 | 0    | 0 | 0 | 0 | not significant |
| 5917 | REACTOME_ION_TRANSPORT_BY_P_TYPE_ATPASES                           | 0.52 | 0    | 0 | 0 | 0 | not significant |
| 5918 | GO_DEATH_DOMAIN_BINDING                                            | 0.53 | 0.03 | 0 | 0 | 0 | not significant |
| 5919 | GO_GENTALIA_MORPHOGENESIS                                          | 0.53 | 0.03 | 0 | 0 | 0 | not significant |
| 5920 | GO_REGULATION_OF_GROWTH_RATE                                       | 0.53 | 0.03 | 0 | 0 | 0 | not significant |
| 5921 | SPIELMAN_LYMPHOBLAST_EUROPEAN_VS_ASIAN_2FC_UP                      | 0.53 | 0.03 | 0 | 0 | 0 | not significant |
| 5922 | GO_BLOC_COMPLEX                                                    | 0.53 | 0.02 | 0 | 0 | 0 | not significant |
| 5923 | GO_REGULATION_OF_BONE_DEVELOPMENT                                  | 0.53 | 0.02 | 0 | 0 | 0 | not significant |
| 5924 | GO_RRNA_3_END_PROCESSING                                           | 0.53 | 0.02 | 0 | 0 | 0 | not significant |
| 5925 | GO_SPHINGOLIPID_TRANSPORTER_ACTIVITY                               | 0.53 | 0.02 | 0 | 0 | 0 | not significant |
| 5926 | LEE_NAME_T_LYMPHOCYTE                                              | 0.53 | 0.02 | 0 | 0 | 0 | not significant |
| 5927 | SANDERSON_PPARA_TARGETS                                            | 0.53 | 0.02 | 0 | 0 | 0 | not significant |
| 5928 | CHR18Q12                                                           | 0.53 | 0.01 | 0 | 0 | 0 | not significant |
| 5929 | GO_GTP_DEPENDENT_PROTEIN_BINDING                                   | 0.53 | 0.01 | 0 | 0 | 0 | not significant |
| 5930 | GO_REGULATION_OF_GENE_EXPRESSION_BY_GENETIC_IMPRINTING             | 0.53 | 0.01 | 0 | 0 | 0 | not significant |
| 5931 | GO_RELAXATION_OF_MUSCLE                                            | 0.53 | 0.01 | 0 | 0 | 0 | not significant |
| 5932 | REACTOME_SIGNALING_BY_NOTCH1_HD_DOMAIN_MUTANTS_IN_CANCER           | 0.53 | 0.01 | 0 | 0 | 0 | not significant |
| 5933 | GO_CARDIAC_MUSCLE_CELL_ACTION_POTENTIAL                            | 0.53 | 0    | 0 | 0 | 0 | not significant |
| 5934 | GO_LATERAL_PLASMA_MEMBRANE                                         | 0.53 | 0    | 0 | 0 | 0 | not significant |
| 5935 | REACTOME_PROTEIN_PROTEIN_INTERACTIONS_AT_SYNAPSES                  | 0.53 | 0    | 0 | 0 | 0 | not significant |
| 5936 | REACTOME_RUNX1_REGULATES_GENES_INVOLVED_IN_MEGAKARYOCYTE_DIFFER    | 0.53 | 0    | 0 | 0 | 0 | not significant |
| 5937 | GO_HISTONE_METHYLTRANSFERASE_ACTIVITY_H3_K27_SPECIFIC              | 0.54 | 0.03 | 0 | 0 | 0 | not significant |
| 5938 | GO_REGULATION_OF_CATECHOLAMINE_METABOLIC_PROCESS                   | 0.54 | 0.03 | 0 | 0 | 0 | not significant |
| 5939 | GO_MRNA_EDITING_COMPLEX                                            | 0.54 | 0.02 | 0 | 0 | 0 | not significant |
| 5940 | GO_NEGATIVE_REGULATION_OF_IMMUNOGLOBULIN_PRODUCTION                | 0.54 | 0.02 | 0 | 0 | 0 | not significant |
| 5941 | GO_NEGATIVE_REGULATION_OF_LYASE_ACTIVITY                           | 0.54 | 0.02 | 0 | 0 | 0 | not significant |
| 5942 | GO_POSITIVE_REGULATION_OF_CARDIAC_MUSCLE_CELL_DIFFERENTIATION      | 0.54 | 0.02 | 0 | 0 | 0 | not significant |
| 5943 | GO_PROTEIN_PRENILTRANSFERASE_ACTIVITY                              | 0.54 | 0.02 | 0 | 0 | 0 | not significant |
| 5944 | GO_PULMONARY_VALVE_DEVELOPMENT                                     | 0.54 | 0.02 | 0 | 0 | 0 | not significant |
| 5945 | OXFORD_RALB_TARGETS_DN                                             | 0.54 | 0.02 | 0 | 0 | 0 | not significant |
| 5946 | REACTOME_OLFACTORY_SIGNALING_PATHWAY                               | 0.54 | 0.02 | 0 | 0 | 0 | not significant |
| 5947 | GO_EMBRYONIC_CAMERA_TYPE_EYE_MORPHOGENESIS                         | 0.54 | 0.01 | 0 | 0 | 0 | not significant |
| 5948 | GO_PHENOL_CONTAINING_COMPOUND_METABOLIC_PROCESS                    | 0.54 | 0.01 | 0 | 0 | 0 | not significant |
| 5949 | GO_POSITIVE_REGULATION_OF_STRIATED_MUSCLE_CONTRACTION              | 0.55 | 0.04 | 0 | 0 | 0 | not significant |
| 5950 | CHR4P13                                                            | 0.55 | 0.03 | 0 | 0 | 0 | not significant |
| 5951 | GO_COPPER_CHAPERONE_ACTIVITY                                       | 0.55 | 0.03 | 0 | 0 | 0 | not significant |
| 5952 | GO_PULMONARY_VALVE_MORPHOGENESIS                                   | 0.55 | 0.03 | 0 | 0 | 0 | not significant |
| 5953 | REACTOME_BETA_OXIDATION_OF_PRISTANOYL_COA                          | 0.55 | 0.03 | 0 | 0 | 0 | not significant |
| 5954 | BIOCARTA_EPHA4_PATHWAY                                             | 0.55 | 0.02 | 0 | 0 | 0 | not significant |
| 5955 | GO_ACTIVATION_OF_MAPKKK_ACTIVITY                                   | 0.55 | 0.02 | 0 | 0 | 0 | not significant |
| 5956 | GO_CELLULAR_RESPONSE_TO_OXIDISED_LOW_DENSITY_LIPOPROTEIN_PARTICLE  | 0.55 | 0.02 | 0 | 0 | 0 | not significant |
| 5957 | GO_FATTY_ACID_DERIVATIVE_CATABOLIC_PROCESS                         | 0.55 | 0.02 | 0 | 0 | 0 | not significant |
| 5958 | GO_INTRACELLULAR_MRNA_LOCALIZATION                                 | 0.55 | 0.02 | 0 | 0 | 0 | not significant |
| 5959 | GO_LONG_CHAIN_FATTY_ACID_BINDING                                   | 0.55 | 0.02 | 0 | 0 | 0 | not significant |
| 5960 | GO_NUCLEOTIDE_TRANSMEMBRANE_TRANSPORT                              | 0.55 | 0.02 | 0 | 0 | 0 | not significant |
| 5961 | GO_POSITIVE_REGULATION_OF_CARDIAC_CELL_DIFFERENTIATION             | 0.55 | 0.02 | 0 | 0 | 0 | not significant |
| 5962 | GO_REGULATION_OF_DEVELOPMENTAL_PIGMENTATION                        | 0.55 | 0.02 | 0 | 0 | 0 | not significant |
| 5963 | GO_FAT_SOLUBLE_VITAMIN_METABOLIC_PROCESS                           | 0.55 | 0.01 | 0 | 0 | 0 | not significant |
| 5964 | GO_REGULATION_OF_NEURAL_PRECURSOR_CELL_PROLIFERATION               | 0.55 | 0    | 0 | 0 | 0 | not significant |
| 5965 | GO_REGULATION_OF_POSTSYNAPTIC_MEMBRANE_NEUROTRANSMITTER_RECEPTI    | 0.55 | 0    | 0 | 0 | 0 | not significant |
| 5966 | PID_AMB2_NEUTROPHILS_PATHWAY                                       | 0.55 | 0    | 0 | 0 | 0 | not significant |
| 5967 | GO_EXTRACELLULAR_MATRIX_COMPONENT                                  | 0.56 | 0.03 | 0 | 0 | 0 | not significant |
| 5968 | GO_FATTY_ACID_DERIVATIVE_METABOLIC_PROCESS                         | 0.56 | 0.03 | 0 | 0 | 0 | not significant |
| 5969 | GO_MITOCHONDRIAL_INTERMEMBRANE_SPACE_PROTEIN_TRANSPORTER_COMPLI    | 0.56 | 0.03 | 0 | 0 | 0 | not significant |
| 5970 | GO_PENTOSE_PHOSPHATE_SHUNT_NON_OXIDATIVE_BRANCH                    | 0.56 | 0.03 | 0 | 0 | 0 | not significant |
| 5971 | GO_PRENILATION                                                     | 0.56 | 0.03 | 0 | 0 | 0 | not significant |
| 5972 | MIKKELSEN_IPS_LCP_WITH_H3K27ME3                                    | 0.56 | 0.03 | 0 | 0 | 0 | not significant |
| 5973 | BIOCARTA_HCMV_PATHWAY                                              | 0.56 | 0.02 | 0 | 0 | 0 | not significant |
| 5974 | GO_ER_ASSOCIATED_MISFOLDED_PROTEIN_CATABOLIC_PROCESS               | 0.56 | 0.02 | 0 | 0 | 0 | not significant |
| 5975 | GO_HETEROCHROMATIN_ORGANIZATION                                    | 0.56 | 0.02 | 0 | 0 | 0 | not significant |
| 5976 | GO_INNATE_IMMUNE_RESPONSE_IN_MUCOSA                                | 0.56 | 0.02 | 0 | 0 | 0 | not significant |
| 5977 | GO_PROTEIN_MATURATION_BY_PROTEIN_FOLDING                           | 0.56 | 0.02 | 0 | 0 | 0 | not significant |
| 5978 | GO_REGULATION_OF_MACROPHAGE_DERIVED_FOAM_CELL_DIFFERENTIATION      | 0.56 | 0.02 | 0 | 0 | 0 | not significant |
| 5979 | GO_RNA_POLYMERASE_III_REGULATORY_REGION_DNA_BINDING                | 0.56 | 0.02 | 0 | 0 | 0 | not significant |
| 5980 | GO_TYPE_B_PANCREATIC_CELL_DEVELOPMENT                              | 0.56 | 0.02 | 0 | 0 | 0 | not significant |
| 5981 | GO_TYPE_I_INTERFERON_BIOSYNTHETIC_PROCESS                          | 0.56 | 0.02 | 0 | 0 | 0 | not significant |
| 5982 | GO_ZINC_ION_TRANSMEMBRANE_TRANSPORT                                | 0.56 | 0.02 | 0 | 0 | 0 | not significant |
| 5983 | LIM_MAMMARY_LUMINAL_PROGENITOR_DN                                  | 0.56 | 0.02 | 0 | 0 | 0 | not significant |

|      |                                                                     |      |      |   |   |   |                 |
|------|---------------------------------------------------------------------|------|------|---|---|---|-----------------|
| 5984 | GO_FOREBRAIN_CELL_MIGRATION                                         | 0.56 | 0.01 | 0 | 0 | 0 | not significant |
| 5985 | MIKKELSEN_NPC_LCP_WITH_H3K4ME3                                      | 0.56 | 0.01 | 0 | 0 | 0 | not significant |
| 5986 | REACTOME_ENERGY_DEPENDENT_REGULATION_OF_MTOR_BY_LKB1_AMPK           | 0.56 | 0.01 | 0 | 0 | 0 | not significant |
| 5987 | REACTOME_IKK_COMPLEX_RECRUITMENT_MEDIATED_BY_RIP1                   | 0.56 | 0.01 | 0 | 0 | 0 | not significant |
| 5988 | REACTOME_NEUREXINS_AND_NEUROLIGINS                                  | 0.56 | 0.01 | 0 | 0 | 0 | not significant |
| 5989 | WANG_RESPONSE_TO_BEXAROTENE_DN                                      | 0.56 | 0.01 | 0 | 0 | 0 | not significant |
| 5990 | GO_PERIPHERAL_NERVOUS_SYSTEM_DEVELOPMENT                            | 0.56 | 0    | 0 | 0 | 0 | not significant |
| 5991 | GO_PURINE_NUCLEOSIDE_TRIPHOSPHATE_CATABOLIC_PROCESS                 | 0.57 | 0.04 | 0 | 0 | 0 | not significant |
| 5992 | KIM_ALL_DISORDERS_DURATION_CORR_UP                                  | 0.57 | 0.04 | 0 | 0 | 0 | not significant |
| 5993 | BIOCARTA_CFTR_PATHWAY                                               | 0.57 | 0.03 | 0 | 0 | 0 | not significant |
| 5994 | GO_ATP_TRANSPORT                                                    | 0.57 | 0.03 | 0 | 0 | 0 | not significant |
| 5995 | GO_EKC_KEOPS_COMPLEX                                                | 0.57 | 0.03 | 0 | 0 | 0 | not significant |
| 5996 | GO_ESTABLISHMENT_OR_MAINTENANCE_OF_TRANSMEMBRANE_ELECTROCHEMIC      | 0.57 | 0.03 | 0 | 0 | 0 | not significant |
| 5997 | GO_RAGE_RECEPTOR_BINDING                                            | 0.57 | 0.03 | 0 | 0 | 0 | not significant |
| 5998 | REACTOME_BETA_OXIDATION_OF_VERY_LONG_CHAIN_FATTY_ACIDS              | 0.57 | 0.03 | 0 | 0 | 0 | not significant |
| 5999 | REACTOME_TRP_CHANNELS                                               | 0.57 | 0.03 | 0 | 0 | 0 | not significant |
| 6000 | REACTOME_VITAMIN_D_CALCIFEROL_METABOLISM                            | 0.57 | 0.03 | 0 | 0 | 0 | not significant |
| 6001 | GO_APOPTOTIC_PROCESS_INVOLVED_IN_MORPHOGENESIS                      | 0.57 | 0.02 | 0 | 0 | 0 | not significant |
| 6002 | GO_EPITHELIAL_CELL_MORPHOGENESIS                                    | 0.57 | 0.02 | 0 | 0 | 0 | not significant |
| 6003 | GO_GLUCOSE_CATABOLIC_PROCESS                                        | 0.57 | 0.02 | 0 | 0 | 0 | not significant |
| 6004 | GO_MDA_5_SIGNALING_PATHWAY                                          | 0.57 | 0.02 | 0 | 0 | 0 | not significant |
| 6005 | GO_MLL3_4_COMPLEX                                                   | 0.57 | 0.02 | 0 | 0 | 0 | not significant |
| 6006 | GO_OSTEOLAST_DEVELOPMENT                                            | 0.57 | 0.02 | 0 | 0 | 0 | not significant |
| 6007 | GO_RESPIRATORY_CHAIN_COMPLEX_IV                                     | 0.57 | 0.02 | 0 | 0 | 0 | not significant |
| 6008 | GO_SPHINGOLIPID_BINDING                                             | 0.57 | 0.02 | 0 | 0 | 0 | not significant |
| 6009 | GO_TRACHEA_FORMATION                                                | 0.57 | 0.02 | 0 | 0 | 0 | not significant |
| 6010 | KEGG_FATTY_ACID_METABOLISM                                          | 0.57 | 0.01 | 0 | 0 | 0 | not significant |
| 6011 | REACTOME_VITAMIN_B5_PANTOTHENATE_METABOLISM                         | 0.57 | 0.01 | 0 | 0 | 0 | not significant |
| 6012 | GO_LYSINE_N_METHYLTRANSFERASE_ACTIVITY                              | 0.57 | 0    | 0 | 0 | 0 | not significant |
| 6013 | GO_POSITIVE_REGULATION_OF_SYNAPTIC_TRANSMISSION                     | 0.57 | 0    | 0 | 0 | 0 | not significant |
| 6014 | GO_REGULATION_OF_NEUROTRANSMITTER_SECRETION                         | 0.57 | 0    | 0 | 0 | 0 | not significant |
| 6015 | GO_COENZYME_TRANSPORT                                               | 0.58 | 0.05 | 0 | 0 | 0 | not significant |
| 6016 | GO_REGULATION_OF_MICROVILLUS_ORGANIZATION                           | 0.58 | 0.05 | 0 | 0 | 0 | not significant |
| 6017 | GO_PEPTIDYL_SERINE_AUTOPHOSPHORYLATION                              | 0.58 | 0.04 | 0 | 0 | 0 | not significant |
| 6018 | GO_POSITIVE_REGULATION_OF_METHYLATION_DEPENDENT_CHROMATIN_SILENCI   | 0.58 | 0.04 | 0 | 0 | 0 | not significant |
| 6019 | GO_POSTSYNAPTIC_ACTIN_CYTOSKELETON_ORGANIZATION                     | 0.58 | 0.04 | 0 | 0 | 0 | not significant |
| 6020 | GO_POSTSYNAPTIC_CYTOSKELETON_ORGANIZATION                           | 0.58 | 0.04 | 0 | 0 | 0 | not significant |
| 6021 | GO_ELASTIC_FIBER_ASSEMBLY                                           | 0.58 | 0.03 | 0 | 0 | 0 | not significant |
| 6022 | GO_METHIONINE_METABOLIC_PROCESS                                     | 0.58 | 0.03 | 0 | 0 | 0 | not significant |
| 6023 | GO_MRNA_3_UTR_AU_RICH_REGION_BINDING                                | 0.58 | 0.03 | 0 | 0 | 0 | not significant |
| 6024 | GO_PONS_DEVELOPMENT                                                 | 0.58 | 0.03 | 0 | 0 | 0 | not significant |
| 6025 | GO_PROTEIN_OXIDATION                                                | 0.58 | 0.03 | 0 | 0 | 0 | not significant |
| 6026 | GO_REGULATION_OF_ENDOTHELIAL_CELL_DEVELOPMENT                       | 0.58 | 0.03 | 0 | 0 | 0 | not significant |
| 6027 | GO_REGULATION_OF_RESPONSE_TO_FOOD                                   | 0.58 | 0.03 | 0 | 0 | 0 | not significant |
| 6028 | GO_THIOESTERASE_BINDING                                             | 0.58 | 0.03 | 0 | 0 | 0 | not significant |
| 6029 | GO_ZINC_ION_TRANSMEMBRANE_TRANSPORTER_ACTIVITY                      | 0.58 | 0.03 | 0 | 0 | 0 | not significant |
| 6030 | REACTOME_NF_KB_IS_ACTIVATED_AND_SIGNALS_SURVIVAL                    | 0.58 | 0.03 | 0 | 0 | 0 | not significant |
| 6031 | GO_GTPASE_ACTIVATING_PROTEIN_BINDING                                | 0.58 | 0.02 | 0 | 0 | 0 | not significant |
| 6032 | GO_NEURON_CELLULAR_HOMEOSTASIS                                      | 0.58 | 0.02 | 0 | 0 | 0 | not significant |
| 6033 | NIELSEN_MALIGNANT_FIBROUS_HISTIOCYTOMA_DN                           | 0.58 | 0.02 | 0 | 0 | 0 | not significant |
| 6034 | GO_FIBROBLAST_MIGRATION                                             | 0.58 | 0.01 | 0 | 0 | 0 | not significant |
| 6035 | GO_REGULATION_OF_MUSCLE_ADAPTATION                                  | 0.58 | 0.01 | 0 | 0 | 0 | not significant |
| 6036 | GO_LAMELLIPODIUM                                                    | 0.58 | 0    | 0 | 0 | 0 | not significant |
| 6037 | REACTOME_SIRT1_NEGATIVELY_REGULATES_RRNA_EXPRESSION                 | 0.58 | 0    | 0 | 0 | 0 | not significant |
| 6038 | CHR13Q33                                                            | 0.59 | 0.04 | 0 | 0 | 0 | not significant |
| 6039 | CHR8P22                                                             | 0.59 | 0.04 | 0 | 0 | 0 | not significant |
| 6040 | GO_ATP_TRANSMEMBRANE_TRANSPORTER_ACTIVITY                           | 0.59 | 0.04 | 0 | 0 | 0 | not significant |
| 6041 | GO_CALCIIUM_CATION_ANTIPORTER_ACTIVITY                              | 0.59 | 0.04 | 0 | 0 | 0 | not significant |
| 6042 | GO_CARDIAC_LEFT_VENTRICLE_MORPHOGENESIS                             | 0.59 | 0.04 | 0 | 0 | 0 | not significant |
| 6043 | GO_NEGATIVE_REGULATION_OF_ACTIN_NUCLEATION                          | 0.59 | 0.04 | 0 | 0 | 0 | not significant |
| 6044 | GO_OLIGOPEPTIDE_BINDING                                             | 0.59 | 0.04 | 0 | 0 | 0 | not significant |
| 6045 | BIOCARTA_INFLAM_PATHWAY                                             | 0.59 | 0.03 | 0 | 0 | 0 | not significant |
| 6046 | GO_EXCRETION                                                        | 0.59 | 0.03 | 0 | 0 | 0 | not significant |
| 6047 | GO_G_RICH_STRAND_TELOMERIC_DNA_BINDING                              | 0.59 | 0.03 | 0 | 0 | 0 | not significant |
| 6048 | GO_POSITIVE_REGULATION_OF_BLOOD_PRESSURE                            | 0.59 | 0.03 | 0 | 0 | 0 | not significant |
| 6049 | RUAN_RESPONSE_TO_TNF_TROGLITAZONE_UP                                | 0.59 | 0.03 | 0 | 0 | 0 | not significant |
| 6050 | GO_BARBED_END_ACTIN_FILAMENT_CAPPING                                | 0.59 | 0.02 | 0 | 0 | 0 | not significant |
| 6051 | GO_CYCLIC_NUCLEOTIDE_BINDING                                        | 0.59 | 0.02 | 0 | 0 | 0 | not significant |
| 6052 | GO_GLYCOPROTEIN_COMPLEX                                             | 0.59 | 0.02 | 0 | 0 | 0 | not significant |
| 6053 | GO_HISTONE_H3_K4_TRIMETHYLATION                                     | 0.59 | 0.02 | 0 | 0 | 0 | not significant |
| 6054 | GO_NEGATIVE_REGULATION_OF_EPITHELIAL_CELL_DIFFERENTIATION           | 0.59 | 0.02 | 0 | 0 | 0 | not significant |
| 6055 | GO_SARCOMERE_ORGANIZATION                                           | 0.59 | 0.02 | 0 | 0 | 0 | not significant |
| 6056 | GO_TELOMERE_MAINTENANCE_VIA_RECOMBINATION                           | 0.59 | 0.02 | 0 | 0 | 0 | not significant |
| 6057 | GO_UBIQUITIN_DEPENDENT_PROTEIN_CATABOLIC_PROCESS_VIA_THE_MULTIVESIC | 0.59 | 0.02 | 0 | 0 | 0 | not significant |
| 6058 | HUANG_FOXA2_TARGETS_DN                                              | 0.59 | 0.02 | 0 | 0 | 0 | not significant |
| 6059 | REACTOME_EPHRIN_SIGNALING                                           | 0.59 | 0.02 | 0 | 0 | 0 | not significant |
| 6060 | VALK_AML_WITH_FLT3_ITD                                              | 0.59 | 0.02 | 0 | 0 | 0 | not significant |
| 6061 | KEEN_RESPONSE_TO_ROSIGLITAZONE_UP                                   | 0.59 | 0.01 | 0 | 0 | 0 | not significant |
| 6062 | TURASHVILI_BREAST_LOBULAR_CARCINOMA_VS_LOBULAR_NORMAL_UP            | 0.59 | 0.01 | 0 | 0 | 0 | not significant |
| 6063 | GO_EXTRACELLULAR_MATRIX_STRUCTURAL_CONSTITUENT_CONFERRING_TENSIL    | 0.60 | 0.05 | 0 | 0 | 0 | not significant |
| 6064 | GO_INTRINSIC_APOPTOTIC_SIGNALING_PATHWAY_IN_RESPONSE_TO_HYDROGEN    | 0.60 | 0.05 | 0 | 0 | 0 | not significant |
| 6065 | GO_REGULATION_OF_TYPE_B_PANCREATIC_CELL_DEVELOPMENT                 | 0.60 | 0.05 | 0 | 0 | 0 | not significant |
| 6066 | GO_HISTONE_DEMETHYLASE_ACTIVITY_H3_K4_SPECIFIC                      | 0.60 | 0.04 | 0 | 0 | 0 | not significant |
| 6067 | GO_REGULATION_OF_CHROMATIN_ASSEMBLY_OR_DISASSEMBLY                  | 0.60 | 0.04 | 0 | 0 | 0 | not significant |
| 6068 | REACTOME_MAPK3_ERK1_ACTIVATION                                      | 0.60 | 0.04 | 0 | 0 | 0 | not significant |
| 6069 | GO_CELL_CELL_SIGNALING_INVOLVED_IN_CARDIAC_CONDUCTION               | 0.60 | 0.03 | 0 | 0 | 0 | not significant |
| 6070 | GO_HAIR_CELL_DIFFERENTIATION                                        | 0.60 | 0.03 | 0 | 0 | 0 | not significant |
| 6071 | GO_INTRINSIC_COMPONENT_OF_POSTSYNAPTIC_DENSITY_MEMBRANE             | 0.60 | 0.03 | 0 | 0 | 0 | not significant |
| 6072 | GO_POSITIVE_REGULATION_OF_ARP2_3_COMPLEX_MEDIATED_ACTIN_NUCLEATIO   | 0.60 | 0.03 | 0 | 0 | 0 | not significant |
| 6073 | GO_PROTECTION_FROM_NON_HOMOLOGOUS_END_JOINING_AT_TELOMERE           | 0.60 | 0.03 | 0 | 0 | 0 | not significant |
| 6074 | GO_REGULATION_OF_VASCULAR_ENDOTHELIAL_GROWTH_FACTOR_RECEPTOR_       | 0.60 | 0.03 | 0 | 0 | 0 | not significant |
| 6075 | LU_TUMOR_VASCULATURE_DN                                             | 0.60 | 0.03 | 0 | 0 | 0 | not significant |
| 6076 | VERRECCHIA_RESPONSE_TO_TGFB1_C3                                     | 0.60 | 0.03 | 0 | 0 | 0 | not significant |
| 6077 | DING_LUNG_CANCER_MUTATED_SIGNIFICANTLY                              | 0.60 | 0.02 | 0 | 0 | 0 | not significant |
| 6078 | GO_DIVALENT_INORGANIC_CATION_TRANSMEMBRANE_TRANSPORTER_ACTIVITY     | 0.60 | 0.02 | 0 | 0 | 0 | not significant |
| 6079 | GO_INTRINSIC_COMPONENT_OF_PEROXISOMAL_MEMBRANE                      | 0.60 | 0.02 | 0 | 0 | 0 | not significant |
| 6080 | GO_POSITIVE_REGULATION_OF_AUTOPHAGY_OF_MITOCHONDRION                | 0.60 | 0.02 | 0 | 0 | 0 | not significant |
| 6081 | GO_REGULATION_OF_PLATELET_DERIVED_GROWTH_FACTOR_RECEPTOR_SIGNA      | 0.60 | 0.02 | 0 | 0 | 0 | not significant |
| 6082 | GO_DIENCEPHALON_DEVELOPMENT                                         | 0.60 | 0.01 | 0 | 0 | 0 | not significant |
| 6083 | GO_NON_MOTILE_CILIUM_ASSEMBLY                                       | 0.60 | 0.01 | 0 | 0 | 0 | not significant |
| 6084 | GO_REGULATION_OF_CELLULAR_RESPONSE_TO_DRUG                          | 0.60 | 0.01 | 0 | 0 | 0 | not significant |
| 6085 | REACTOME_DEACTIVATION_OF_THE_BETA_CATENIN_TRANSACTIVATING_COMPLE    | 0.60 | 0.01 | 0 | 0 | 0 | not significant |
| 6086 | GO_ACTIN_FILAMENT_BINDING                                           | 0.60 | 0    | 0 | 0 | 0 | not significant |
| 6087 | GO_POSITIVE_REGULATION_OF_ION_TRANSMEMBRANE_TRANSPORT               | 0.60 | 0    | 0 | 0 | 0 | not significant |
| 6088 | GO_REGULATION_OF_NEUROTRANSMITTER_RECEPTOR_LOCALIZATION_TO_POST     | 0.61 | 0.06 | 0 | 0 | 0 | not significant |
| 6089 | GO_APICAL_DENDRITE                                                  | 0.61 | 0.05 | 0 | 0 | 0 | not significant |
| 6090 | GO_FATTY_ACYL_COA_METABOLIC_PROCESS                                 | 0.61 | 0.05 | 0 | 0 | 0 | not significant |
| 6091 | GO_LENS_FIBER_CELL_DEVELOPMENT                                      | 0.61 | 0.05 | 0 | 0 | 0 | not significant |
| 6092 | GO_NEGATIVE_REGULATION_OF_DNA_ENDOREDUPLICATION                     | 0.61 | 0.05 | 0 | 0 | 0 | not significant |

|      |                                                                     |      |      |   |   |   |                 |
|------|---------------------------------------------------------------------|------|------|---|---|---|-----------------|
| 6093 | DASU_IL6_SIGNALING_SCAR_DN                                          | 0.61 | 0.04 | 0 | 0 | 0 | not significant |
| 6094 | DAZARD_UV_RESPONSE_CLUSTER_G5                                       | 0.61 | 0.04 | 0 | 0 | 0 | not significant |
| 6095 | GO_CELLULAR_RESPONSE_TO_NITROGEN_STARVATION                         | 0.61 | 0.04 | 0 | 0 | 0 | not significant |
| 6096 | GO_NEGATIVE_REGULATION_OF_OXIDATIVE_STRESS_INDUCED_INTRINSIC_APOPTI | 0.61 | 0.04 | 0 | 0 | 0 | not significant |
| 6097 | GO_POSITIVE_REGULATION_OF_CHONDROCYTE_DIFFERENTIATION               | 0.61 | 0.04 | 0 | 0 | 0 | not significant |
| 6098 | GO_POSITIVE_REGULATION_OF_DOUBLE_STRAND_BREAK_REPAIR_VIA_NONHOMO    | 0.61 | 0.04 | 0 | 0 | 0 | not significant |
| 6099 | GO_PROTEIN_ACTIVATION_CASCADE                                       | 0.61 | 0.04 | 0 | 0 | 0 | not significant |
| 6100 | GO_REGULATION_OF_PHOSPHOLIPID_BIOSYNTHETIC_PROCESS                  | 0.61 | 0.04 | 0 | 0 | 0 | not significant |
| 6101 | IZUKA_LIVER_CANCER_PROGRESSION_LO_L1_UP                             | 0.61 | 0.04 | 0 | 0 | 0 | not significant |
| 6102 | REACTOME_COLLAGEN_CHAIN_TRIMERIZATION                               | 0.61 | 0.04 | 0 | 0 | 0 | not significant |
| 6103 | GO_DEOXYRIBONUCLEOSIDE_TRIPHOSPHATE_CATABOLIC_PROCESS               | 0.61 | 0.03 | 0 | 0 | 0 | not significant |
| 6104 | GO_NEGATIVE_REGULATION_OF_TUMOR_NECROSIS_FACTOR_MEDIATED_SIGNALI    | 0.61 | 0.03 | 0 | 0 | 0 | not significant |
| 6105 | GO_POSITIVE_REGULATION_OF_CHROMATIN_SILENCING                       | 0.61 | 0.03 | 0 | 0 | 0 | not significant |
| 6106 | GO_REGULATION_OF_DNA_DAMAGE_CHECKPOINT                              | 0.61 | 0.03 | 0 | 0 | 0 | not significant |
| 6107 | NABA_COLLAGENS                                                      | 0.61 | 0.03 | 0 | 0 | 0 | not significant |
| 6108 | REACTOME_TRANSLOCATION_OF_ZAP_70_TO_IMMUNOLOGICAL_SYNAPSE           | 0.61 | 0.03 | 0 | 0 | 0 | not significant |
| 6109 | CHR2Q24                                                             | 0.61 | 0.02 | 0 | 0 | 0 | not significant |
| 6110 | GO_LYSINE_ACETYLATED_HISTONE_BINDING                                | 0.61 | 0.02 | 0 | 0 | 0 | not significant |
| 6111 | GO_POSITIVE_REGULATION_OF_CELL_JUNCTION_ASSEMBLY                    | 0.61 | 0.02 | 0 | 0 | 0 | not significant |
| 6112 | GO_PROTEIN_QUALITY_CONTROL_FOR_MISFOLDED_OR_INCOMPLETELY_SYNTHE     | 0.61 | 0.02 | 0 | 0 | 0 | not significant |
| 6113 | GO_POSITIVE_REGULATION_OF_DNA_BINDING                               | 0.61 | 0.01 | 0 | 0 | 0 | not significant |
| 6114 | GO_PRIMARY_ALCOHOL_METABOLIC_PROCESS                                | 0.61 | 0.01 | 0 | 0 | 0 | not significant |
| 6115 | ZHAN_MULTIPLE_MYELOMA_CD1_VS_CD2_DN                                 | 0.61 | 0.01 | 0 | 0 | 0 | not significant |
| 6116 | GO_CHANGES_TO_DNA_METHYLATION_INVOLVED_IN_EMBRYO_DEVELOPMENT        | 0.62 | 0.06 | 0 | 0 | 0 | not significant |
| 6117 | GO_ICOSANOID_RECEPTOR_ACTIVITY                                      | 0.62 | 0.06 | 0 | 0 | 0 | not significant |
| 6118 | REACTOME_BETA_OXIDATION_OF_HEXANOYL_COA_TO_BUTANOYL_COA             | 0.62 | 0.06 | 0 | 0 | 0 | not significant |
| 6119 | REACTOME_CROSSLINKING_OF_COLLAGEN_FIBRILS                           | 0.62 | 0.06 | 0 | 0 | 0 | not significant |
| 6120 | REACTOME_INTRINSIC_PATHWAY_OF_FIBRIN_CLOT_FORMATION                 | 0.62 | 0.06 | 0 | 0 | 0 | not significant |
| 6121 | CASTELLANO_HRAS_AND_NRAS_TARGETS_DN                                 | 0.62 | 0.05 | 0 | 0 | 0 | not significant |
| 6122 | GO_EATING_BEHAVIOR                                                  | 0.62 | 0.05 | 0 | 0 | 0 | not significant |
| 6123 | GO_HISTONE_H2A_K119_MONOUBIQUITINATION                              | 0.62 | 0.05 | 0 | 0 | 0 | not significant |
| 6124 | GO_ENDOSOME_TO_LYSOSOME_TRANSPORT_VIA_MULTIVESICULAR_BODY_SORT      | 0.62 | 0.04 | 0 | 0 | 0 | not significant |
| 6125 | GO_MALE_MEIOSIS_I                                                   | 0.62 | 0.04 | 0 | 0 | 0 | not significant |
| 6126 | GO_NEGATIVE_REGULATION_OF_HISTONE_H3_K9_METHYLATION                 | 0.62 | 0.04 | 0 | 0 | 0 | not significant |
| 6127 | GO_RNA_SPLICING_VIA_ENDONUCLEOLYTIC_CLEAVAGE_AND_LIGATION           | 0.62 | 0.04 | 0 | 0 | 0 | not significant |
| 6128 | CLASPER_LYMPHATIC_VESSELS_DURING_METASTASIS_DN                      | 0.62 | 0.03 | 0 | 0 | 0 | not significant |
| 6129 | GO_MAST_CELL_GRANULE                                                | 0.62 | 0.03 | 0 | 0 | 0 | not significant |
| 6130 | GO_PURINE_CONTAINING_COMPOUND_SALVAGE                               | 0.62 | 0.03 | 0 | 0 | 0 | not significant |
| 6131 | CHR3P24                                                             | 0.62 | 0.02 | 0 | 0 | 0 | not significant |
| 6132 | GO_ENDOPLASMIC_RETICULUM_CALCIIUM_ION_HOMEOSTASIS                   | 0.62 | 0.02 | 0 | 0 | 0 | not significant |
| 6133 | GO_NUCLEAR_MIGRATION                                                | 0.62 | 0.02 | 0 | 0 | 0 | not significant |
| 6134 | GO_PPTIDYL_CYSSTEINE_MODIFICATION                                   | 0.62 | 0.02 | 0 | 0 | 0 | not significant |
| 6135 | YU_BAP1_TARGETS                                                     | 0.62 | 0.02 | 0 | 0 | 0 | not significant |
| 6136 | GO_RHO_GUANYL_NUCLEOTIDE_EXCHANGE_FACTOR_ACTIVITY                   | 0.62 | 0.01 | 0 | 0 | 0 | not significant |
| 6137 | GO_METALLOPEPTIDASE_ACTIVITY                                        | 0.62 | 0    | 0 | 0 | 0 | not significant |
| 6138 | GO_REGULATION_OF_NEUROTRANSMITTER_TRANSPORT                         | 0.62 | 0    | 0 | 0 | 0 | not significant |
| 6139 | GO_C_TERMINAL_PROTEIN_LIPIDATION                                    | 0.63 | 0.06 | 0 | 0 | 0 | not significant |
| 6140 | GO_CARNITINE_O_ACYLTRANSFERASE_ACTIVITY                             | 0.63 | 0.06 | 0 | 0 | 0 | not significant |
| 6141 | GO_COENZYME_TRANSMEMBRANE_TRANSPORTER_ACTIVITY                      | 0.63 | 0.06 | 0 | 0 | 0 | not significant |
| 6142 | GO_FIBROBLAST_ACTIVATION                                            | 0.63 | 0.06 | 0 | 0 | 0 | not significant |
| 6143 | GO_NEGATIVE_REGULATION_OF_HELICASE_ACTIVITY                         | 0.63 | 0.06 | 0 | 0 | 0 | not significant |
| 6144 | GO_THALAMUS_DEVELOPMENT                                             | 0.63 | 0.06 | 0 | 0 | 0 | not significant |
| 6145 | IZUKA_LIVER_CANCER_PROGRESSION_G1_G2_UP                             | 0.63 | 0.06 | 0 | 0 | 0 | not significant |
| 6146 | REACTOME_FCGR_ACTIVATION                                            | 0.63 | 0.06 | 0 | 0 | 0 | not significant |
| 6147 | GO_BLOOD_COAGULATION_INTRINSIC_PATHWAY                              | 0.63 | 0.05 | 0 | 0 | 0 | not significant |
| 6148 | GO_BRANCHING_INVOLVED_IN_LABYRINTHINE_LAYER_MORPHOGENESIS           | 0.63 | 0.05 | 0 | 0 | 0 | not significant |
| 6149 | GO_DIPHOSPHOTRANSFERASE_ACTIVITY                                    | 0.63 | 0.05 | 0 | 0 | 0 | not significant |
| 6150 | GO_NK_T_CELL_DIFFERENTIATION                                        | 0.63 | 0.05 | 0 | 0 | 0 | not significant |
| 6151 | GO_REGULATION_OF_POTASSIUM_ION_IMPORT                               | 0.63 | 0.05 | 0 | 0 | 0 | not significant |
| 6152 | GO_REGULATION_OF_SKELETAL_MUSCLE_CELL_DIFFERENTIATION               | 0.63 | 0.05 | 0 | 0 | 0 | not significant |
| 6153 | GO_REGULATION_OF_T_CELL_CHEMOTAXIS                                  | 0.63 | 0.05 | 0 | 0 | 0 | not significant |
| 6154 | GO_SULFUR_AMINO_ACID_CATABOLIC_PROCESS                              | 0.63 | 0.05 | 0 | 0 | 0 | not significant |
| 6155 | REACTOME_ACETYLCHOLINE_REGULATES_INSULIN_SECRETION                  | 0.63 | 0.05 | 0 | 0 | 0 | not significant |
| 6156 | STEGER_ADIPOGENESIS_DN                                              | 0.63 | 0.05 | 0 | 0 | 0 | not significant |
| 6157 | STEGMEIER_PRE-MITOTIC_CELL_CYCLE_REGULATORS                         | 0.63 | 0.05 | 0 | 0 | 0 | not significant |
| 6158 | GO_CHEMOKINE_RECEPTOR_BINDING                                       | 0.63 | 0.04 | 0 | 0 | 0 | not significant |
| 6159 | GO_FATTY_ACID_BETA_OXIDATION_USING_ACYL_COA_OXIDASE                 | 0.63 | 0.04 | 0 | 0 | 0 | not significant |
| 6160 | GO_NEGATIVE_REGULATION_OF_EMBRYONIC_DEVELOPMENT                     | 0.63 | 0.04 | 0 | 0 | 0 | not significant |
| 6161 | GO_TUMOR_NECROSIS_FACTOR_SECRETION                                  | 0.63 | 0.04 | 0 | 0 | 0 | not significant |
| 6162 | KYNG_NORMAL_AGING_UP                                                | 0.63 | 0.04 | 0 | 0 | 0 | not significant |
| 6163 | CHR12Q12                                                            | 0.63 | 0.03 | 0 | 0 | 0 | not significant |
| 6164 | GO_DNA_REPLICATION_ORIGIN_BINDING                                   | 0.63 | 0.03 | 0 | 0 | 0 | not significant |
| 6165 | GO_NEGATIVE_REGULATION_OF_MUSCLE_HYPERTROPHY                        | 0.63 | 0.03 | 0 | 0 | 0 | not significant |
| 6166 | GO_POSITIVE_REGULATION_OF_BMP_SIGNALING_PATHWAY                     | 0.63 | 0.03 | 0 | 0 | 0 | not significant |
| 6167 | GO_PROTEIN_LOCALIZATION_TO_GOLGI_APPARATUS                          | 0.63 | 0.03 | 0 | 0 | 0 | not significant |
| 6168 | MEISSNER_BRAIN_ICP_WITH_H3K4ME3                                     | 0.63 | 0.03 | 0 | 0 | 0 | not significant |
| 6169 | REACTOME_HDM5_DEMETHYLATE_HISTONES                                  | 0.63 | 0.03 | 0 | 0 | 0 | not significant |
| 6170 | REACTOME_NEGATIVE_REGULATION_OF_MET_ACTIVITY                        | 0.63 | 0.03 | 0 | 0 | 0 | not significant |
| 6171 | REACTOME_SYNTHESIS_OF_PIPS_AT_THE_GOLGI_MEMBRANE                    | 0.63 | 0.03 | 0 | 0 | 0 | not significant |
| 6172 | GO_BRAIN_MORPHOGENESIS                                              | 0.63 | 0.02 | 0 | 0 | 0 | not significant |
| 6173 | GO_CELLULAR_RESPONSE_TO_RETINOIC_ACID                               | 0.63 | 0.02 | 0 | 0 | 0 | not significant |
| 6174 | GO_EMBRYONIC_SKELETAL_SYSTEM_DEVELOPMENT                            | 0.63 | 0.01 | 0 | 0 | 0 | not significant |
| 6175 | GO_VESICLE_MEDIATED_TRANSPORT_IN_SYNAPSE                            | 0.63 | 0    | 0 | 0 | 0 | not significant |
| 6176 | GO_NEGATIVE_REGULATION_OF_GLYCOGEN_METABOLIC_PROCESS                | 0.64 | 0.07 | 0 | 0 | 0 | not significant |
| 6177 | GO_CALYX_OF_HELD                                                    | 0.64 | 0.06 | 0 | 0 | 0 | not significant |
| 6178 | GO_MYELIN_SHEATH_ABAXONAL_REGION                                    | 0.64 | 0.06 | 0 | 0 | 0 | not significant |
| 6179 | GO_POSITIVE_REGULATION_OF_MONOCYTE_DIFFERENTIATION                  | 0.64 | 0.06 | 0 | 0 | 0 | not significant |
| 6180 | GO_POSITIVE_REGULATION_OF_NON_CANONICAL_WNT_SIGNALING_PATHWAY       | 0.64 | 0.06 | 0 | 0 | 0 | not significant |
| 6181 | GO_SCAR_COMPLEX                                                     | 0.64 | 0.06 | 0 | 0 | 0 | not significant |
| 6182 | GO_VCP_NPL4_UFD1_AAA_ATPASE_COMPLEX                                 | 0.64 | 0.06 | 0 | 0 | 0 | not significant |
| 6183 | REACTOME_SYNTHESIS_OF_PG                                            | 0.64 | 0.06 | 0 | 0 | 0 | not significant |
| 6184 | GO_MITOTIC_DNA_REPLICATION_CHECKPOINT                               | 0.64 | 0.05 | 0 | 0 | 0 | not significant |
| 6185 | GO_POSITIVE_REGULATION_OF_FIBROBLAST_APOPTOTIC_PROCESS              | 0.64 | 0.05 | 0 | 0 | 0 | not significant |
| 6186 | GO_REGULATION_OF_PODOSOME_ASSEMBLY                                  | 0.64 | 0.05 | 0 | 0 | 0 | not significant |
| 6187 | GO_WNT_SIGNALING_PATHWAY_INVOLVED_IN_MIDBRAIN_DOPAMINERGIC_NEURON   | 0.64 | 0.05 | 0 | 0 | 0 | not significant |
| 6188 | LEIN_LOCALIZED_TO_DISTAL_AND_PROXIMAL_DENDRITES                     | 0.64 | 0.05 | 0 | 0 | 0 | not significant |
| 6189 | REACTOME_EPHA_MEDIATED_GROWTH_CONE_COLLAPSE                         | 0.64 | 0.05 | 0 | 0 | 0 | not significant |
| 6190 | REACTOME_THE_CANONICAL_RETINOID_CYCLE_IN_RODS_TWILIGHT_VISION       | 0.64 | 0.05 | 0 | 0 | 0 | not significant |
| 6191 | STEGMEIER_PREMITOTIC_CELL_CYCLE_REGULATORS                          | 0.64 | 0.05 | 0 | 0 | 0 | not significant |
| 6192 | GO_CHAPERONE_MEDIATED_AUTOPHAGY                                     | 0.64 | 0.04 | 0 | 0 | 0 | not significant |
| 6193 | GO_CYCLIC_NUCLEOTIDE_PHOSPHODIESTERASE_ACTIVITY                     | 0.64 | 0.04 | 0 | 0 | 0 | not significant |
| 6194 | POS_RESPONSE_TO_HISTAMINE_UP                                        | 0.64 | 0.04 | 0 | 0 | 0 | not significant |
| 6195 | REACTOME_EARLY_PHASE_OF_HIV_LIFE_CYCLE                              | 0.64 | 0.04 | 0 | 0 | 0 | not significant |
| 6196 | REACTOME_O_GLYCOSYLATION_OF_TSR_DOMAIN_CONTAINING_PROTEINS          | 0.64 | 0.04 | 0 | 0 | 0 | not significant |
| 6197 | MCCABE_HOXC6_TARGETS_CANCER_DN                                      | 0.64 | 0.03 | 0 | 0 | 0 | not significant |
| 6198 | PID_EPHA_FWDPATHWAY                                                 | 0.64 | 0.03 | 0 | 0 | 0 | not significant |
| 6199 | GO_REGULATION_OF_BMP_SIGNALING_PATHWAY                              | 0.64 | 0.02 | 0 | 0 | 0 | not significant |
| 6200 | GO_REGULATION_OF_CENTROSOME_DUPLICATION                             | 0.64 | 0.02 | 0 | 0 | 0 | not significant |
| 6201 | CHR3Q13                                                             | 0.64 | 0.01 | 0 | 0 | 0 | not significant |

|      |                                                                    |      |      |   |   |   |                 |
|------|--------------------------------------------------------------------|------|------|---|---|---|-----------------|
| 6202 | CHR7P22                                                            | 0.64 | 0.01 | 0 | 0 | 0 | not significant |
| 6203 | GO_ANDROGEN_RECEPTOR_BINDING                                       | 0.64 | 0.01 | 0 | 0 | 0 | not significant |
| 6204 | MIKKELSEN_ES_ICP_WITH_H3K27ME3                                     | 0.65 | 0.07 | 0 | 0 | 0 | not significant |
| 6205 | REACTOME_UNBLOCKING_OF_NMDA_RECEPTORS_GLUTAMATE_BINDING_AND_AC     | 0.65 | 0.07 | 0 | 0 | 0 | not significant |
| 6206 | GO_ACETYLCHOLINE_GATED_CHANNEL_COMPLEX                             | 0.65 | 0.06 | 0 | 0 | 0 | not significant |
| 6207 | GO_CEREBELLAR_PURKINJE_CELL_LAYER_FORMATION                        | 0.65 | 0.06 | 0 | 0 | 0 | not significant |
| 6208 | GO_FIBRINOLYSIS                                                    | 0.65 | 0.06 | 0 | 0 | 0 | not significant |
| 6209 | GO_GAMMA_CATENIN_BINDING                                           | 0.65 | 0.06 | 0 | 0 | 0 | not significant |
| 6210 | GO_NEGATIVE_REGULATION_OF_OSTEOBLAST_PROLIFERATION                 | 0.65 | 0.06 | 0 | 0 | 0 | not significant |
| 6211 | GO_POSITIVE_REGULATION_OF_EXECUTION_PHASE_OF_APOPTOSIS             | 0.65 | 0.06 | 0 | 0 | 0 | not significant |
| 6212 | GO_REGULATION_OF_MITOTIC_RECOMBINATION                             | 0.65 | 0.06 | 0 | 0 | 0 | not significant |
| 6213 | GO_REGULATION_OF_NEUTROPHIL_DEGRANULATION                          | 0.65 | 0.06 | 0 | 0 | 0 | not significant |
| 6214 | HASINA_NOL7_TARGETS_DN                                             | 0.65 | 0.06 | 0 | 0 | 0 | not significant |
| 6215 | CHR16Q13                                                           | 0.65 | 0.05 | 0 | 0 | 0 | not significant |
| 6216 | GO_POSITIVE_REGULATION_OF_RECEPTOR_BIOSYNTHETIC_PROCESS            | 0.65 | 0.05 | 0 | 0 | 0 | not significant |
| 6217 | GO_REGULATION_OF_APOPTOTIC_DNA_FRAGMENTATION                       | 0.65 | 0.05 | 0 | 0 | 0 | not significant |
| 6218 | GO_SEMINIFEROUS_TUBULE_DEVELOPMENT                                 | 0.65 | 0.05 | 0 | 0 | 0 | not significant |
| 6219 | NAKAJIMA_EOSINOPHIL                                                | 0.65 | 0.05 | 0 | 0 | 0 | not significant |
| 6220 | GO_REGULATION_OF_FIBROBLAST_MIGRATION                              | 0.65 | 0.04 | 0 | 0 | 0 | not significant |
| 6221 | PID_BETA_CATENIN_DEG_PATHWAY                                       | 0.65 | 0.04 | 0 | 0 | 0 | not significant |
| 6222 | REACTOME_BUTYRATE_RESPONSE_FACTOR_1_BRF1_BINDS_AND_DESTABILIZES    | 0.65 | 0.04 | 0 | 0 | 0 | not significant |
| 6223 | REACTOME_ROLE_OF_PHOSPHOLIPIDS_IN_PHAGOCYTOSIS                     | 0.65 | 0.04 | 0 | 0 | 0 | not significant |
| 6224 | WALLACE_JAK2_TARGETS_UP                                            | 0.65 | 0.04 | 0 | 0 | 0 | not significant |
| 6225 | CHANGOLKAR_H2AFY_TARGETS_UP                                        | 0.65 | 0.03 | 0 | 0 | 0 | not significant |
| 6226 | GO_H4_H2A_HISTONE_ACETYLTRANSFERASE_COMPLEX                        | 0.65 | 0.03 | 0 | 0 | 0 | not significant |
| 6227 | GO_HISTONE_DEMETHYLASE_ACTIVITY                                    | 0.65 | 0.03 | 0 | 0 | 0 | not significant |
| 6228 | GO_LONG_TERM_SYNAPTIC_POTENTIATION                                 | 0.65 | 0.03 | 0 | 0 | 0 | not significant |
| 6229 | GO_NEGATIVE_REGULATION_OF_ORGANELLE_ASSEMBLY                       | 0.65 | 0.03 | 0 | 0 | 0 | not significant |
| 6230 | GO_POSITIVE_REGULATION_OF_MITOCHONDRIAL_OUTER_MEMBRANE_PERMEABIL   | 0.65 | 0.03 | 0 | 0 | 0 | not significant |
| 6231 | KEGG_REGULATION_OF_AUTOPHAGY                                       | 0.65 | 0.03 | 0 | 0 | 0 | not significant |
| 6232 | CHR8Q22                                                            | 0.65 | 0.02 | 0 | 0 | 0 | not significant |
| 6233 | GO_CELL_REDOX_HOMEOSTASIS                                          | 0.65 | 0.02 | 0 | 0 | 0 | not significant |
| 6234 | GO_EXTRINSIC_COMPONENT_OF_CYTOPLASMIC_SIDE_OF_PLASMA_MEMBRANE      | 0.65 | 0.01 | 0 | 0 | 0 | not significant |
| 6235 | GO_SPECIFICATION_OF_SYMMETRY                                       | 0.65 | 0.01 | 0 | 0 | 0 | not significant |
| 6236 | GO_SYNAPTIC_VESICLE_EXOCYTOSIS                                     | 0.65 | 0.01 | 0 | 0 | 0 | not significant |
| 6237 | GO_MELANOSOME_MEMBRANE                                             | 0.66 | 0.08 | 0 | 0 | 0 | not significant |
| 6238 | GO_GROWTH_PLATE_CARTILAGE_CHONDROCYTE_DIFFERENTIATION              | 0.66 | 0.07 | 0 | 0 | 0 | not significant |
| 6239 | GO_POSITIVE_REGULATION_OF_GLIAL_CELL_MIGRATION                     | 0.66 | 0.07 | 0 | 0 | 0 | not significant |
| 6240 | GO_SYNAPTIC_VESICLE_DOCKING                                        | 0.66 | 0.07 | 0 | 0 | 0 | not significant |
| 6241 | DE_Y1_TARGETS_UP                                                   | 0.66 | 0.06 | 0 | 0 | 0 | not significant |
| 6242 | GO_AUTOPHAGY_OF_PEROXISOME                                         | 0.66 | 0.06 | 0 | 0 | 0 | not significant |
| 6243 | GO_MIDBRAIN_DOPAMINERGIC_NEURON_DIFFERENTIATION                    | 0.66 | 0.06 | 0 | 0 | 0 | not significant |
| 6244 | GO_NEGATIVE_REGULATION_OF_RIG_I_SIGNALING_PATHWAY                  | 0.66 | 0.06 | 0 | 0 | 0 | not significant |
| 6245 | GO_NEGATIVE_REGULATION_OF_TRANSCRIPTION_REGULATORY_REGION_DNA_BII  | 0.66 | 0.06 | 0 | 0 | 0 | not significant |
| 6246 | GO_NEGATIVE_REGULATION_OF_VIRAL_INDUCED_CYTOPLASMIC_PATTERN_RECO   | 0.66 | 0.06 | 0 | 0 | 0 | not significant |
| 6247 | GO_POSITIVE_REGULATION_OF_MITOCHONDRIAL_CALCIIUM_ION_CONCENTRATION | 0.66 | 0.06 | 0 | 0 | 0 | not significant |
| 6248 | KAMIKUBO_MYELOID_MN1_NETWORK                                       | 0.66 | 0.06 | 0 | 0 | 0 | not significant |
| 6249 | MYLLYKANGAS_AMPLIFICATION_HOT_SPOT_13                              | 0.66 | 0.06 | 0 | 0 | 0 | not significant |
| 6250 | REACTOME_PROTON_COUPLED_MONOCARBOXYLATE_TRANSPORT                  | 0.66 | 0.06 | 0 | 0 | 0 | not significant |
| 6251 | CHR20P12                                                           | 0.66 | 0.05 | 0 | 0 | 0 | not significant |
| 6252 | CHR2P24                                                            | 0.66 | 0.05 | 0 | 0 | 0 | not significant |
| 6253 | CHR6Q16                                                            | 0.66 | 0.05 | 0 | 0 | 0 | not significant |
| 6254 | GO_CELL_FATE_COMMITMENT_INVOLVED_IN_FORMATION_OF_PRIMARY_GERM_L    | 0.66 | 0.05 | 0 | 0 | 0 | not significant |
| 6255 | GO_MITOCHONDRIA_ASSOCIATED_ENDOPLASMIC_RETICULUM_MEMBRANE          | 0.66 | 0.05 | 0 | 0 | 0 | not significant |
| 6256 | GO_NUCLEOSIDE_KINASE_ACTIVITY                                      | 0.66 | 0.05 | 0 | 0 | 0 | not significant |
| 6257 | MADAN_DPPA4_TARGETS                                                | 0.66 | 0.05 | 0 | 0 | 0 | not significant |
| 6258 | ZHANG_RESPONSE_TO_CANTHARDIN_UP                                    | 0.66 | 0.05 | 0 | 0 | 0 | not significant |
| 6259 | CHR12P11                                                           | 0.66 | 0.04 | 0 | 0 | 0 | not significant |
| 6260 | GO_AJ_RICH_ELEMENT_BINDING                                         | 0.66 | 0.04 | 0 | 0 | 0 | not significant |
| 6261 | GO_ERBB2_SIGNALING_PATHWAY                                         | 0.66 | 0.04 | 0 | 0 | 0 | not significant |
| 6262 | GO_GAMMA_TUBULIN_BINDING                                           | 0.66 | 0.04 | 0 | 0 | 0 | not significant |
| 6263 | GO_POLYSACCHARIDE_CATABOLIC_PROCESS                                | 0.66 | 0.04 | 0 | 0 | 0 | not significant |
| 6264 | GO_SWR1_COMPLEX                                                    | 0.66 | 0.04 | 0 | 0 | 0 | not significant |
| 6265 | KEGG_PROTEIN_EXPORT                                                | 0.66 | 0.04 | 0 | 0 | 0 | not significant |
| 6266 | REACTOME_GENERATION_OF_SECOND_MESSENGER_MOLECULES                  | 0.66 | 0.04 | 0 | 0 | 0 | not significant |
| 6267 | GO_GOLGI_TO_PLASMA_MEMBRANE_PROTEIN_TRANSPORT                      | 0.66 | 0.03 | 0 | 0 | 0 | not significant |
| 6268 | GO_NEURON_PROJECTION_REGENERATION                                  | 0.66 | 0.03 | 0 | 0 | 0 | not significant |
| 6269 | GO_CELLULAR_PIGMENTATION                                           | 0.66 | 0.02 | 0 | 0 | 0 | not significant |
| 6270 | GO_NEGATIVE_REGULATION_OF_TOR_SIGNALING                            | 0.66 | 0.02 | 0 | 0 | 0 | not significant |
| 6271 | GO_RNA_POLYMERASE_II_REPRESSING_TRANSCRIPTION_FACTOR_BINDING       | 0.66 | 0.02 | 0 | 0 | 0 | not significant |
| 6272 | GO_SNARE_COMPLEX                                                   | 0.66 | 0.02 | 0 | 0 | 0 | not significant |
| 6273 | GO_ATPASE_COMPLEX                                                  | 0.66 | 0.01 | 0 | 0 | 0 | not significant |
| 6274 | GO_TUBE_FORMATION                                                  | 0.66 | 0.01 | 0 | 0 | 0 | not significant |
| 6275 | BENPORATH_NOS_TARGETS                                              | 0    | 0    | 0 | 0 | 0 | not significant |
| 6276 | GO_ADHERENS_JUNCTION_ORGANIZATION                                  | 0.66 | 0    | 0 | 0 | 0 | not significant |
| 6277 | CHANG_POU5F1_TARGETS_UP                                            | 0.67 | 0.08 | 0 | 0 | 0 | not significant |
| 6278 | GO_HISTONE_H3_H4_DEMETHYLATION                                     | 0.67 | 0.08 | 0 | 0 | 0 | not significant |
| 6279 | GO_3_HYDROXYACYL_COA_DEHYDROGENASE_ACTIVITY                        | 0.67 | 0.07 | 0 | 0 | 0 | not significant |
| 6280 | GO_CORPUS_CALLOSUM_MORPHOGENESIS                                   | 0.67 | 0.07 | 0 | 0 | 0 | not significant |
| 6281 | GO_LOCOMOTORY_EXPLORATION_BEHAVIOR                                 | 0.67 | 0.07 | 0 | 0 | 0 | not significant |
| 6282 | GO_NEGATIVE_REGULATION_OF_HEMATOPOIETIC_PROGENITOR_CELL_DIFFEREN   | 0.67 | 0.07 | 0 | 0 | 0 | not significant |
| 6283 | GO_POSITIVE_REGULATION_OF_TUMOR_NECROSIS_FACTOR_BIOSYNTHETIC_PRO   | 0.67 | 0.07 | 0 | 0 | 0 | not significant |
| 6284 | GO_RAP_PROTEIN_SIGNAL_TRANSDUCTION                                 | 0.67 | 0.07 | 0 | 0 | 0 | not significant |
| 6285 | GO_RELAXATION_OF_CARDIAC_MUSCLE                                    | 0.67 | 0.07 | 0 | 0 | 0 | not significant |
| 6286 | REACTOME_TRIGLYCERIDE_BIOSYNTHESIS                                 | 0.67 | 0.07 | 0 | 0 | 0 | not significant |
| 6287 | GO_3_5_CYCLIC_GMP_PHOSPHODIESTERASE_ACTIVITY                       | 0.67 | 0.06 | 0 | 0 | 0 | not significant |
| 6288 | GO_CELLULAR_RESPONSE_TO_THYROID_HORMONE_STIMULUS                   | 0.67 | 0.06 | 0 | 0 | 0 | not significant |
| 6289 | GO_NEGATIVE_REGULATION_OF_HEART_CONTRACTION                        | 0.67 | 0.06 | 0 | 0 | 0 | not significant |
| 6290 | GO_POSITIVE_REGULATION_OF_EXCITATORY_POSTSYNAPTIC_POTENTIAL        | 0.67 | 0.06 | 0 | 0 | 0 | not significant |
| 6291 | GO_POSITIVE_REGULATION_OF_MITOCHONDRIAL_FISSION                    | 0.67 | 0.06 | 0 | 0 | 0 | not significant |
| 6292 | GO_POSITIVE_REGULATION_OF_PODOSOME_ASSEMBLY                        | 0.67 | 0.06 | 0 | 0 | 0 | not significant |
| 6293 | GO_POSITIVE_REGULATION_OF_TRIGLYCERIDE_BIOSYNTHETIC_PROCESS        | 0.67 | 0.06 | 0 | 0 | 0 | not significant |
| 6294 | GO_REGULATION_OF_TOLERANCE_INDUCTION                               | 0.67 | 0.06 | 0 | 0 | 0 | not significant |
| 6295 | BOYALT_LIVER_CANCER_SUBCLASS_G3_DN                                 | 0.67 | 0.05 | 0 | 0 | 0 | not significant |
| 6296 | FRASOR_RESPONSE_TO_SERM_OR_FULVESTRANT_UP                          | 0.67 | 0.05 | 0 | 0 | 0 | not significant |
| 6297 | GO_COPI_COATED_VESICLE_MEMBRANE                                    | 0.67 | 0.05 | 0 | 0 | 0 | not significant |
| 6298 | GO_NEGATIVE_REGULATION_OF_ENDOPLASMIC_RETICULUM_STRESS_INDUCED_IN  | 0.67 | 0.05 | 0 | 0 | 0 | not significant |
| 6299 | GO_PENTOSE_PHOSPHATE_SHUNT                                         | 0.67 | 0.05 | 0 | 0 | 0 | not significant |
| 6300 | NIELSEN_LIPOSARCOMA_DN                                             | 0.67 | 0.05 | 0 | 0 | 0 | not significant |
| 6301 | REACTOME_TICAM1_RIP1_MEDIATED_IKK_COMPLEX_RECRUITMENT              | 0.67 | 0.05 | 0 | 0 | 0 | not significant |
| 6302 | CHR14Q21                                                           | 0.67 | 0.04 | 0 | 0 | 0 | not significant |
| 6303 | GO_ACETYLGALACTOSAMINYLTRANSFERASE_ACTIVITY                        | 0.67 | 0.04 | 0 | 0 | 0 | not significant |
| 6304 | GO_INTRACELLULAR_LIPID_TRANSPORT                                   | 0.67 | 0.04 | 0 | 0 | 0 | not significant |
| 6305 | GO_POSITIVE_REGULATION_OF_NEURAL_PRECURSOR_CELL_PROLIFERATION      | 0.67 | 0.04 | 0 | 0 | 0 | not significant |
| 6306 | GO_SEMAPHORIN_PLEXIN_SIGNALING_PATHWAY                             | 0.67 | 0.04 | 0 | 0 | 0 | not significant |
| 6307 | GO_DORSAL_VENTRAL_PATTERN_FORMATION                                | 0.67 | 0.03 | 0 | 0 | 0 | not significant |
| 6308 | GO_REGULATION_OF_ERYTHROCYTE_DIFFERENTIATION                       | 0.67 | 0.03 | 0 | 0 | 0 | not significant |
| 6309 | GO_MUSCLE_ADAPTATION                                               | 0.67 | 0.02 | 0 | 0 | 0 | not significant |
| 6310 | GO_NEGATIVE_REGULATION_OF_DNA_REPLICATION                          | 0.67 | 0.02 | 0 | 0 | 0 | not significant |

|      |                                                                 |      |      |   |   |   |                 |
|------|-----------------------------------------------------------------|------|------|---|---|---|-----------------|
| 6311 | GO_POSITIVE_REGULATION_OF_CELL_CYCLE_G1_S_PHASE_TRANSITION      | 0.67 | 0.02 | 0 | 0 | 0 | not significant |
| 6312 | BOUDOUKHA_BOUND_BY_IGF2BP2                                      | 0.67 | 0.01 | 0 | 0 | 0 | not significant |
| 6313 | GO_REGULATION_OF_CILIUM_MOVEMENT                                | 0.68 | 0.09 | 0 | 0 | 0 | not significant |
| 6314 | KANG_GLI3_TARGETS                                               | 0.68 | 0.09 | 0 | 0 | 0 | not significant |
| 6315 | GO_POSITIVE_REGULATION_OF_TUMOR_NECROSIS_FACTOR_SECRETION       | 0.68 | 0.08 | 0 | 0 | 0 | not significant |
| 6316 | GO_REGULATION_OF_CARDIAC_MUSCLE_CELL_MEMBRANE_REPOLARIZATION    | 0.68 | 0.08 | 0 | 0 | 0 | not significant |
| 6317 | GO_SYNAPTIC_TRANSMISSION_CHOLINERGIC                            | 0.68 | 0.08 | 0 | 0 | 0 | not significant |
| 6318 | BYSTRYKH_HEMATOPOIESIS_STEM_CELL_FL11                           | 0.68 | 0.07 | 0 | 0 | 0 | not significant |
| 6319 | CHR7P21                                                         | 0.68 | 0.07 | 0 | 0 | 0 | not significant |
| 6320 | GO ASPARTATE_TRANSMEMBRANE_TRANSPORT                            | 0.68 | 0.07 | 0 | 0 | 0 | not significant |
| 6321 | GO_ENTRY_OF_BACTERIUM_INTO_HOST_CELL                            | 0.68 | 0.07 | 0 | 0 | 0 | not significant |
| 6322 | GO_POSITIVE_REGULATION_OF_HETEROTYPIC_CELL_CELL_ADHESION        | 0.68 | 0.07 | 0 | 0 | 0 | not significant |
| 6323 | GO_REGULATION_OF_CILIUM_BEAT_FREQUENCY                          | 0.68 | 0.07 | 0 | 0 | 0 | not significant |
| 6324 | BIOCARTA_SPPA_PATHWAY                                           | 0.68 | 0.06 | 0 | 0 | 0 | not significant |
| 6325 | GO_INNER_EAR_AUDITORY_RECEPTOR_CELL_DIFFERENTIATION             | 0.68 | 0.06 | 0 | 0 | 0 | not significant |
| 6326 | GO_SYNTAXIN_1_BINDING                                           | 0.68 | 0.06 | 0 | 0 | 0 | not significant |
| 6327 | PJANA_BREAST_CANCER_WITH_BRCA1_MUTATED_DN                       | 0.68 | 0.06 | 0 | 0 | 0 | not significant |
| 6328 | REACTOME_PECAM1_INTERACTIONS                                    | 0.68 | 0.06 | 0 | 0 | 0 | not significant |
| 6329 | DARWICHE_PAPILLOMA_RISK_HIGH_VS_LOW_DN                          | 0.68 | 0.05 | 0 | 0 | 0 | not significant |
| 6330 | GO_INTERCALATED_DISC                                            | 0.68 | 0.05 | 0 | 0 | 0 | not significant |
| 6331 | MEISSNER_NPC_ICP_WITH_H3K4ME3                                   | 0.68 | 0.05 | 0 | 0 | 0 | not significant |
| 6332 | CHR4Q35                                                         | 0.68 | 0.04 | 0 | 0 | 0 | not significant |
| 6333 | GO_POSITIVE_REGULATION_OF_CALCMIUM_MEDIATED_SIGNALING           | 0.68 | 0.04 | 0 | 0 | 0 | not significant |
| 6334 | PETRETTO_CARDIAC_HYPERTROPHY                                    | 0.68 | 0.04 | 0 | 0 | 0 | not significant |
| 6335 | BALDWIN_PRKCL_TARGETS_UP                                        | 0.68 | 0.03 | 0 | 0 | 0 | not significant |
| 6336 | CHRXQ22                                                         | 0.68 | 0.03 | 0 | 0 | 0 | not significant |
| 6337 | GO_DISULFIDE_OXIDOREDUCTASE_ACTIVITY                            | 0.68 | 0.03 | 0 | 0 | 0 | not significant |
| 6338 | GO_HOMOTYPIC_CELL_CELL_ADHESION                                 | 0.68 | 0.03 | 0 | 0 | 0 | not significant |
| 6339 | PID_P13KCL_PATHWAY                                              | 0.68 | 0.03 | 0 | 0 | 0 | not significant |
| 6340 | GO_ESTABLISHMENT_OF_PROTEIN_LOCALIZATION_TO_PLASMA_MEMBRANE     | 0.68 | 0.02 | 0 | 0 | 0 | not significant |
| 6341 | GO_SITE_OF_DNA_DAMAGE                                           | 0.68 | 0.02 | 0 | 0 | 0 | not significant |
| 6342 | IWANAGA_CARCIINOGENESIS_BY_KRAS_UP                              | 0.68 | 0.01 | 0 | 0 | 0 | not significant |
| 6343 | NOTCH_DNV1_UP                                                   | 0.68 | 0.01 | 0 | 0 | 0 | not significant |
| 6344 | CHR8Q23                                                         | 0.69 | 0.09 | 0 | 0 | 0 | not significant |
| 6345 | GO_MACROPHAGE_CYTOKINE_PRODUCTION                               | 0.69 | 0.09 | 0 | 0 | 0 | not significant |
| 6346 | GO_NEGATIVE_REGULATION_OF_AUTOPHAGY_OF_MITOCHONDRION            | 0.69 | 0.09 | 0 | 0 | 0 | not significant |
| 6347 | GO_NOTOCHORD_DEVELOPMENT                                        | 0.69 | 0.09 | 0 | 0 | 0 | not significant |
| 6348 | GO_PLATELET_DENSE_GRANULE_LUMEN                                 | 0.69 | 0.09 | 0 | 0 | 0 | not significant |
| 6349 | GO_ANTEROGRADE_AXONAL_PROTEIN_TRANSPORT                         | 0.69 | 0.08 | 0 | 0 | 0 | not significant |
| 6350 | GO_EARLY_PHAGOSOME                                              | 0.69 | 0.08 | 0 | 0 | 0 | not significant |
| 6351 | GO_EMBRYONIC_BRAIN_DEVELOPMENT                                  | 0.69 | 0.08 | 0 | 0 | 0 | not significant |
| 6352 | GO_NEGATIVE_REGULATION_OF_PROTEIN_K63_LINKED_UBIQUITINATION     | 0.69 | 0.08 | 0 | 0 | 0 | not significant |
| 6353 | GO_POSITIVE_REGULATION_OF_NEUROBLAST_PROLIFERATION              | 0.69 | 0.08 | 0 | 0 | 0 | not significant |
| 6354 | GO_REGULATION_OF_ARP2_3_COMPLEX_MEDIATED_ACTIN_NUCLEATION       | 0.69 | 0.08 | 0 | 0 | 0 | not significant |
| 6355 | HESSON_TUMOR_SUPPRESSOR_CLUSTER_3P21_3                          | 0.69 | 0.08 | 0 | 0 | 0 | not significant |
| 6356 | MATZUK_EARLY_ANTRAL_FOLLICLE                                    | 0.69 | 0.08 | 0 | 0 | 0 | not significant |
| 6357 | REACTOME_SYNTHESIS_OF_PIPS_AT_THE_ER_MEMBRANE                   | 0.69 | 0.08 | 0 | 0 | 0 | not significant |
| 6358 | ELLWOOD_MYC_TARGETS_UP                                          | 0.69 | 0.07 | 0 | 0 | 0 | not significant |
| 6359 | GO_3_PHOSPHOADENOSINE_5_PHOSPHOSULFATE_METABOLIC_PROCESS        | 0.69 | 0.07 | 0 | 0 | 0 | not significant |
| 6360 | GO_CUL2_RING_UBIQUITIN_LIGASE_COMPLEX                           | 0.69 | 0.07 | 0 | 0 | 0 | not significant |
| 6361 | GO_HISTONE_MRNA_CATABOLIC_PROCESS                               | 0.69 | 0.07 | 0 | 0 | 0 | not significant |
| 6362 | GO_NEGATIVE_REGULATION_OF_GLIOGENESIS                           | 0.69 | 0.07 | 0 | 0 | 0 | not significant |
| 6363 | GO_NEGATIVE_REGULATION_OF_PROTEIN_ACETYLATION                   | 0.69 | 0.07 | 0 | 0 | 0 | not significant |
| 6364 | GO_PATTERN_RECOGNITION_RECEPTOR_ACTIVITY                        | 0.69 | 0.07 | 0 | 0 | 0 | not significant |
| 6365 | GO_POSITIVE_REGULATION_OF_CENTROSOME_CYCLE                      | 0.69 | 0.07 | 0 | 0 | 0 | not significant |
| 6366 | GO_RNA_DNA_HYBRID_RIBONUCLEASE_ACTIVITY                         | 0.69 | 0.07 | 0 | 0 | 0 | not significant |
| 6367 | REACTOME_RA_BIOSYNTHESIS_PATHWAY                                | 0.69 | 0.07 | 0 | 0 | 0 | not significant |
| 6368 | WANG_NFKB_TARGETS                                               | 0.69 | 0.07 | 0 | 0 | 0 | not significant |
| 6369 | CHR11Q22                                                        | 0.69 | 0.06 | 0 | 0 | 0 | not significant |
| 6370 | GO_ACTIVIN_RECEPTOR_SIGNALING_PATHWAY                           | 0.69 | 0.06 | 0 | 0 | 0 | not significant |
| 6371 | GO_FOAM_CELL_DIFFERENTIATION                                    | 0.69 | 0.06 | 0 | 0 | 0 | not significant |
| 6372 | GO_GLYCOSYLTRANSFERASE_ACTIVITY                                 | 0.69 | 0.06 | 0 | 0 | 0 | not significant |
| 6373 | GO_MITOCHONDRIAL_PROTEIN_PROCESSING                             | 0.69 | 0.06 | 0 | 0 | 0 | not significant |
| 6374 | GO_NECROPTOTIC_SIGNALING_PATHWAY                                | 0.69 | 0.06 | 0 | 0 | 0 | not significant |
| 6375 | GO_NEGATIVE_REGULATION_OF_REGULATED_SECRETORY_PATHWAY           | 0.69 | 0.06 | 0 | 0 | 0 | not significant |
| 6376 | GO_PHOSPHATIDYLCHOLINE_BIOSYNTHETIC_PROCESS                     | 0.69 | 0.06 | 0 | 0 | 0 | not significant |
| 6377 | GO_PTERIDINE_CONTAINING_COMPOUND_BIOSYNTHETIC_PROCESS           | 0.69 | 0.06 | 0 | 0 | 0 | not significant |
| 6378 | GRAHAM_CML_QUIESCENT_VS_NORMAL_QUIESCENT_DN                     | 0.69 | 0.06 | 0 | 0 | 0 | not significant |
| 6379 | REACTOME_ACTIVATED_NOTCH1_TRANSMITS_SIGNAL_TO_THE_NUCLEUS       | 0.69 | 0.06 | 0 | 0 | 0 | not significant |
| 6380 | REACTOME_METABOLISM_OF_PORPHYRINS                               | 0.69 | 0.06 | 0 | 0 | 0 | not significant |
| 6381 | REACTOME_REGULATION_OF_IFNA_SIGNALING                           | 0.69 | 0.06 | 0 | 0 | 0 | not significant |
| 6382 | GO_MULTICELLULAR_ORGANISM_AGING                                 | 0.69 | 0.05 | 0 | 0 | 0 | not significant |
| 6383 | GO_POSITIVE_REGULATION_OF_G1_S_TRANSITION_OF_MITOTIC_CELL_CYCLE | 0.69 | 0.05 | 0 | 0 | 0 | not significant |
| 6384 | GO_PROTEIN_LOCALIZATION_TO_MICROTUBULE_ORGANIZING_CENTER        | 0.69 | 0.05 | 0 | 0 | 0 | not significant |
| 6385 | MARTIN_NFKB_TARGETS_UP                                          | 0.69 | 0.05 | 0 | 0 | 0 | not significant |
| 6386 | LIANG_HEMATOPOIESIS_STEM_CELL_NUMBER_SMALL_VS_HUGE_UP           | 0.69 | 0.04 | 0 | 0 | 0 | not significant |
| 6387 | ULE_SPLICING_VIA_NOVA2                                          | 0.69 | 0.04 | 0 | 0 | 0 | not significant |
| 6388 | GO_CELLULAR_RESPONSE_TO_MECHANICAL_STIMULUS                     | 0.69 | 0.03 | 0 | 0 | 0 | not significant |
| 6389 | REACTOME_PKMTS METHYLATE_HISTONE_LYSINES                        | 0.69 | 0.03 | 0 | 0 | 0 | not significant |
| 6390 | GO_CELL_SUBSTRATE_JUNCTION_ASSEMBLY                             | 0.69 | 0.02 | 0 | 0 | 0 | not significant |
| 6391 | GO_NUCLEOSIDE_PHOSPHATE_CATABOLIC_PROCESS                       | 0.69 | 0.02 | 0 | 0 | 0 | not significant |
| 6392 | GO_PML_BODY                                                     | 0.69 | 0.02 | 0 | 0 | 0 | not significant |
| 6393 | GO_SH3_DOMAIN_BINDING                                           | 0.69 | 0.02 | 0 | 0 | 0 | not significant |
| 6394 | ACEVEDO_LIVER_CANCER_WITH_H3K27ME3_DN                           | 0.69 | 0.01 | 0 | 0 | 0 | not significant |
| 6395 | GO_GUANYL_NUCLEOTIDE_EXCHANGE_FACTOR_ACTIVITY                   | 0.69 | 0    | 0 | 0 | 0 | not significant |
| 6396 | GO_AXON_INITIAL_SEGMENT                                         | 0.70 | 0.1  | 0 | 0 | 0 | not significant |
| 6397 | GO_FACIAL_NERVE_STRUCTURAL_ORGANIZATION                         | 0.70 | 0.1  | 0 | 0 | 0 | not significant |
| 6398 | GO_PURINE_DEOXYRIBONUCLEOTIDE_CATABOLIC_PROCESS                 | 0.70 | 0.1  | 0 | 0 | 0 | not significant |
| 6399 | GO_EUKARYOTIC_INITIATION_FACTOR_4E_BINDING                      | 0.70 | 0.09 | 0 | 0 | 0 | not significant |
| 6400 | GO_FRUCTOSE_1_6_BISPHOSPHATE_METABOLIC_PROCESS                  | 0.70 | 0.09 | 0 | 0 | 0 | not significant |
| 6401 | GO_MIRNA_LOADING_ONTO_RISC_INVOLVED_IN_GENE_SILENCING_BY_MIRNA  | 0.70 | 0.09 | 0 | 0 | 0 | not significant |
| 6402 | GO_NEGATIVE_REGULATION_OF_MITOPHAGY                             | 0.70 | 0.09 | 0 | 0 | 0 | not significant |
| 6403 | GO_WHITE_FAT_CELL_DIFFERENTIATION                               | 0.70 | 0.09 | 0 | 0 | 0 | not significant |
| 6404 | KOINUMA_COLON_CANCER_MSI_UP                                     | 0.70 | 0.09 | 0 | 0 | 0 | not significant |
| 6405 | PID_S1P_S1P4_PATHWAY                                            | 0.70 | 0.09 | 0 | 0 | 0 | not significant |
| 6406 | GO_CELLULAR_RESPONSE_TO_TESTOSTERONE_STIMULUS                   | 0.70 | 0.08 | 0 | 0 | 0 | not significant |
| 6407 | GO_DENDRITIC_SHAFT                                              | 0.70 | 0.08 | 0 | 0 | 0 | not significant |
| 6408 | GO_POSITIVE_REGULATION_OF_GLYCOLYTIC_PROCESS                    | 0.70 | 0.08 | 0 | 0 | 0 | not significant |
| 6409 | GO_REGULATION_OF_EXIT_FROM_MITOSIS                              | 0.70 | 0.08 | 0 | 0 | 0 | not significant |
| 6410 | GO_RETINOL_DEHYDROGENASE_ACTIVITY                               | 0.70 | 0.08 | 0 | 0 | 0 | not significant |
| 6411 | REACTOME_ETHANOL_OXIDATION                                      | 0.70 | 0.08 | 0 | 0 | 0 | not significant |
| 6412 | GO_APICAL_PROTEIN_LOCALIZATION                                  | 0.70 | 0.07 | 0 | 0 | 0 | not significant |
| 6413 | GO_CYCLIC_NUCLEOTIDE_CATABOLIC_PROCESS                          | 0.70 | 0.07 | 0 | 0 | 0 | not significant |
| 6414 | GO_GABA_RECEPTOR_BINDING                                        | 0.70 | 0.07 | 0 | 0 | 0 | not significant |
| 6415 | GO_POSITIVE_REGULATION_OF_RESPONSE_TO_DRUG                      | 0.70 | 0.07 | 0 | 0 | 0 | not significant |
| 6416 | GO_POSITIVE_REGULATION_OF_VASCULAR_ENDOTHELIAL_GROWTH_FACTOR_PR | 0.70 | 0.07 | 0 | 0 | 0 | not significant |
| 6417 | GO_REGULATION_OF_BILE_ACID_METABOLIC_PROCESS                    | 0.70 | 0.07 | 0 | 0 | 0 | not significant |
| 6418 | GO_REGULATION_OF_ENDOCRINE_PROCESS                              | 0.70 | 0.07 | 0 | 0 | 0 | not significant |
| 6419 | GO_TELOMERE_MAINTENANCE_IN_RESPONSE_TO_DNA_DAMAGE               | 0.70 | 0.07 | 0 | 0 | 0 | not significant |

|      |                                                                     |      |      |   |   |   |                 |
|------|---------------------------------------------------------------------|------|------|---|---|---|-----------------|
| 6420 | HE_PTEN_TARGETS_UP                                                  | 0.70 | 0.07 | 0 | 0 | 0 | not significant |
| 6421 | MIKKELSEN_ES_HCP_WITH_H3_UNMETHYLATED                               | 0.70 | 0.07 | 0 | 0 | 0 | not significant |
| 6422 | REACTOME_NEF_MEDIATED_DOWNREGULATION_OF_MHC_CLASS_I_COMPLEX_CE      | 0.70 | 0.07 | 0 | 0 | 0 | not significant |
| 6423 | REACTOME_RUNX2_REGULATES_OSTEOBLAST_DIFFERENTIATION                 | 0.70 | 0.07 | 0 | 0 | 0 | not significant |
| 6424 | REACTOME_SMALL_INTERFERING_RNA_SIRNA_BIOGENESIS                     | 0.70 | 0.07 | 0 | 0 | 0 | not significant |
| 6425 | VALK_AML_CLUSTER_1                                                  | 0.70 | 0.07 | 0 | 0 | 0 | not significant |
| 6426 | CHR7P13                                                             | 0.70 | 0.06 | 0 | 0 | 0 | not significant |
| 6427 | GO_CARDIAC_MUSCLE_CELL_CONTRACTION                                  | 0.70 | 0.06 | 0 | 0 | 0 | not significant |
| 6428 | GO_HISTONE_H2A_UBIQUITINATION                                       | 0.70 | 0.06 | 0 | 0 | 0 | not significant |
| 6429 | GO_NUCLEOTIDE_EXCISION_REPAIR_PREINCISION_COMPLEX_STABILIZATION     | 0.70 | 0.06 | 0 | 0 | 0 | not significant |
| 6430 | GO_TRANSPOSITION                                                    | 0.70 | 0.06 | 0 | 0 | 0 | not significant |
| 6431 | REACTOME_TP53_REGULATES_TRANSCRIPTION_OF_ADDITIONAL_CELL_CYCLE_G    | 0.70 | 0.06 | 0 | 0 | 0 | not significant |
| 6432 | YAP1_DN                                                             | 0.70 | 0.06 | 0 | 0 | 0 | not significant |
| 6433 | BRIDEAU_IMPRINTED_GENES                                             | 0.70 | 0.05 | 0 | 0 | 0 | not significant |
| 6434 | GO_NUCLEAR_TRANSCRIBED_MRNA_POLY_A_TAIL_SHORTENING                  | 0.70 | 0.05 | 0 | 0 | 0 | not significant |
| 6435 | GO_REGULATION_OF_HUMORAL_IMMUNE_RESPONSE                            | 0.70 | 0.05 | 0 | 0 | 0 | not significant |
| 6436 | GO_SCHAFFER_COLLATERAL_CA1_SYNAPSE                                  | 0.70 | 0.05 | 0 | 0 | 0 | not significant |
| 6437 | KRAS_AMP_LUNG_UP.V1_UP                                              | 0.70 | 0.05 | 0 | 0 | 0 | not significant |
| 6438 | BOYLAN_MULTIPLE_MYELOMA_C_UP                                        | 0.70 | 0.04 | 0 | 0 | 0 | not significant |
| 6439 | GO_POSITIVE_REGULATION_OF_CELL_SUBSTRATE_ADHESION                   | 0.70 | 0.04 | 0 | 0 | 0 | not significant |
| 6440 | GAZDA_DIAMOND_BLACKFAN_ANEMIA_PROGENITOR_DN                         | 0.70 | 0.03 | 0 | 0 | 0 | not significant |
| 6441 | GO_ACTION_POTENTIAL                                                 | 0.70 | 0.03 | 0 | 0 | 0 | not significant |
| 6442 | GO_HISTONE_H4_ACETYLTATION                                          | 0.70 | 0.03 | 0 | 0 | 0 | not significant |
| 6443 | GO_RETINA_DEVELOPMENT_IN_CAMERA_TYPE_EYE                            | 0.70 | 0.02 | 0 | 0 | 0 | not significant |
| 6444 | TAKAO_RESPONSE_TO_UVB_RADIATION_UP                                  | 0.70 | 0.01 | 0 | 0 | 0 | not significant |
| 6445 | CREIGHTON_ENDOCRINE_THERAPY_RESISTANCE_2                            | 0.70 | 0    | 0 | 0 | 0 | not significant |
| 6446 | GO_CELL_LEADING_EDGE                                                | 0.70 | 0    | 0 | 0 | 0 | not significant |
| 6447 | GO_CRANIAL_NERVE_STRUCTURAL_ORGANIZATION                            | 0.71 | 0.1  | 0 | 0 | 0 | not significant |
| 6448 | GO_NADP_METABOLIC_PROCESS                                           | 0.71 | 0.1  | 0 | 0 | 0 | not significant |
| 6449 | GO_NEGATIVE_REGULATION_OF_PROTEIN_POLYUBIQUITINATION                | 0.71 | 0.1  | 0 | 0 | 0 | not significant |
| 6450 | GO_PINOSOME                                                         | 0.71 | 0.1  | 0 | 0 | 0 | not significant |
| 6451 | GO_POTASSIUM_TRANSPORTING_ATPASE_ACTIVITY                           | 0.71 | 0.1  | 0 | 0 | 0 | not significant |
| 6452 | GO_RNA_POLYMERASE_III_GENERAL_TRANSCRIPTION_INITIATION_FACTOR_ACTIV | 0.71 | 0.1  | 0 | 0 | 0 | not significant |
| 6453 | CHEOK_RESPONSE_TO_MERCAPTOPURINE_AND_LD_MTX_DN                      | 0.71 | 0.09 | 0 | 0 | 0 | not significant |
| 6454 | DELACROIX_RAR_TARGETS_DN                                            | 0.71 | 0.09 | 0 | 0 | 0 | not significant |
| 6455 | GO_ALCOHOL_DEHYDROGENASE_NADPLUS_ACTIVITY                           | 0.71 | 0.09 | 0 | 0 | 0 | not significant |
| 6456 | GO_CALCIIUM_DEPENDENT_PROTEIN_SERINE_THREONINE_PHOSPHATASE_ACTIVIT  | 0.71 | 0.09 | 0 | 0 | 0 | not significant |
| 6457 | GO_POSITIVE_REGULATION_OF_ER_ASSOCIATED_UBIQUITIN_DEPENDENT_PROTEI  | 0.71 | 0.09 | 0 | 0 | 0 | not significant |
| 6458 | GO_PROTEIN_HORMONE_RECEPTOR_ACTIVITY                                | 0.71 | 0.09 | 0 | 0 | 0 | not significant |
| 6459 | GO_SODIUM_POTASSIUM_EXCHANGING_ATPASE_COMPLEX                       | 0.71 | 0.09 | 0 | 0 | 0 | not significant |
| 6460 | PID_ALK2_PATHWAY                                                    | 0.71 | 0.09 | 0 | 0 | 0 | not significant |
| 6461 | REACTOME_SEMA4D_MEDIATED_INHIBITION_OF_CELL_ATTACHMENT_AND_MIGRAT   | 0.71 | 0.09 | 0 | 0 | 0 | not significant |
| 6462 | SMID_BREAST_CANCER_RELAPSE_IN_LUNG_UP                               | 0.71 | 0.09 | 0 | 0 | 0 | not significant |
| 6463 | BIOCARTA_PLC_PATHWAY                                                | 0.71 | 0.08 | 0 | 0 | 0 | not significant |
| 6464 | GO_CELLULAR_RESPONSE_TO_ETHANOL                                     | 0.71 | 0.08 | 0 | 0 | 0 | not significant |
| 6465 | GO_FATTY_ACID_LIGASE_ACTIVITY                                       | 0.71 | 0.08 | 0 | 0 | 0 | not significant |
| 6466 | GO_I_SMAD_BINDING                                                   | 0.71 | 0.08 | 0 | 0 | 0 | not significant |
| 6467 | GO_POSITIVE_REGULATION_OF_ASPARTIC_TYPE_PEPTIDASE_ACTIVITY          | 0.71 | 0.08 | 0 | 0 | 0 | not significant |
| 6468 | GO POSITIVE REGULATION OF EXTRINSIC APOPTOTIC SIGNALING PATHWAY IN  | 0.71 | 0.08 | 0 | 0 | 0 | not significant |
| 6469 | GO_PROTEIN_LOCALIZATION_TO_PRESYNAPSE                               | 0.71 | 0.08 | 0 | 0 | 0 | not significant |
| 6470 | GO_SINGLE_STRAND_BREAK_REPAIR                                       | 0.71 | 0.08 | 0 | 0 | 0 | not significant |
| 6471 | HAN_JNK_SIGNALING_DN                                                | 0.71 | 0.08 | 0 | 0 | 0 | not significant |
| 6472 | PID_ECADHERIN_KERATINOCYTE_PATHWAY                                  | 0.71 | 0.08 | 0 | 0 | 0 | not significant |
| 6473 | REACTOME_TRANSCRIPTION_OF_E2F_TARGETS_UNDER_NEGATIVE_CONTROL_BY     | 0.71 | 0.08 | 0 | 0 | 0 | not significant |
| 6474 | SA_PTEN_PATHWAY                                                     | 0.71 | 0.08 | 0 | 0 | 0 | not significant |
| 6475 | ZEMBUTSU_SENSITIVITY_TO_METHOTREXATE                                | 0.71 | 0.08 | 0 | 0 | 0 | not significant |
| 6476 | GARGALOVIC_RESPONSE_TO_OXIDIZED_PHOSPHOLIPIDS_CYAN_UP               | 0.71 | 0.07 | 0 | 0 | 0 | not significant |
| 6477 | GO_MICROTUBULE_ANCHORING_AT_MICROTUBULE_ORGANIZING_CENTER           | 0.71 | 0.07 | 0 | 0 | 0 | not significant |
| 6478 | GO_RECEPTOR_SIGNALING_COMPLEX_SCAFFOLD_ACTIVITY                     | 0.71 | 0.07 | 0 | 0 | 0 | not significant |
| 6479 | KEGG_PENTOSE_PHOSPHATE_PATHWAY                                      | 0.71 | 0.07 | 0 | 0 | 0 | not significant |
| 6480 | VALK_AML_CLUSTER_8                                                  | 0.71 | 0.07 | 0 | 0 | 0 | not significant |
| 6481 | GO_INTRINSIC_COMPONENT_OF_POSTSYNAPTIC_SPECIALIZATION_MEMBRANE      | 0.71 | 0.06 | 0 | 0 | 0 | not significant |
| 6482 | GO_NUCLEAR_OUTER_MEMBRANE                                           | 0.71 | 0.06 | 0 | 0 | 0 | not significant |
| 6483 | BIOCARTA_EDG1_PATHWAY                                               | 0.71 | 0.05 | 0 | 0 | 0 | not significant |
| 6484 | CHR15Q21                                                            | 0.71 | 0.05 | 0 | 0 | 0 | not significant |
| 6485 | EHLERS_ANEUPOLOIDY_UP                                               | 0.71 | 0.05 | 0 | 0 | 0 | not significant |
| 6486 | GO_MULTICELLULAR_ORGANISMAL_RESPONSE_TO_STRESS                      | 0.71 | 0.05 | 0 | 0 | 0 | not significant |
| 6487 | GO_POSITIVE_REGULATION_OF_WOUND_HEALING                             | 0.71 | 0.05 | 0 | 0 | 0 | not significant |
| 6488 | GO_RENAL_SYSTEM_PROCESS                                             | 0.71 | 0.05 | 0 | 0 | 0 | not significant |
| 6489 | NIKOLSKY_BREAST_CANCER_7P22_AMPLICON                                | 0.71 | 0.05 | 0 | 0 | 0 | not significant |
| 6490 | GO_DENDRITIC_SPINE_DEVELOPMENT                                      | 0.71 | 0.04 | 0 | 0 | 0 | not significant |
| 6491 | GO_MOLTING_CYCLE                                                    | 0.71 | 0.04 | 0 | 0 | 0 | not significant |
| 6492 | GO_PCG_PROTEIN_COMPLEX                                              | 0.71 | 0.04 | 0 | 0 | 0 | not significant |
| 6493 | GO_ROOF_OF_MOUTH_DEVELOPMENT                                        | 0.71 | 0.04 | 0 | 0 | 0 | not significant |
| 6494 | GO_SENSORY_PERCEPTION_OF_PAIN                                       | 0.71 | 0.04 | 0 | 0 | 0 | not significant |
| 6495 | GO_VESICLE_DOCKING                                                  | 0.71 | 0.04 | 0 | 0 | 0 | not significant |
| 6496 | HUTTMANN_B_CLL_POOR_SURVIVAL_DN                                     | 0.71 | 0.04 | 0 | 0 | 0 | not significant |
| 6497 | GO_ACTIVATION_OF_GTPASE_ACTIVITY                                    | 0.71 | 0.03 | 0 | 0 | 0 | not significant |
| 6498 | GO_OXIDOREDUCTASE_COMPLEX                                           | 0.71 | 0.03 | 0 | 0 | 0 | not significant |
| 6499 | GO_REGULATION_OF_INTRACELLULAR_STEROID_HORMONE_RECEPTOR_SIGNALIN    | 0.71 | 0.03 | 0 | 0 | 0 | not significant |
| 6500 | GO_RUFFLE_MEMBRANE                                                  | 0.71 | 0.03 | 0 | 0 | 0 | not significant |
| 6501 | GO_HISTONE_METHYLATION                                              | 0.71 | 0.02 | 0 | 0 | 0 | not significant |
| 6502 | GO_REGULATION_OF_CELL_SHAPE                                         | 0.71 | 0.02 | 0 | 0 | 0 | not significant |
| 6503 | GO_REGULATION_OF_MEMBRANE_POTENTIAL                                 | 0.71 | 0    | 0 | 0 | 0 | not significant |
| 6504 | GO_ACETYLCHOLINE_GATED_CATION_SELECTIVE_CHANNEL_ACTIVITY            | 0.72 | 0.11 | 0 | 0 | 0 | not significant |
| 6505 | GO_DIPEPTIDYL_PEPTIDASE_ACTIVITY                                    | 0.72 | 0.1  | 0 | 0 | 0 | not significant |
| 6506 | GO_ETHANOL_OXIDATION                                                | 0.72 | 0.1  | 0 | 0 | 0 | not significant |
| 6507 | GO_NEGATIVE_REGULATION_OF_TRANSCRIPTION_ELONGATION_FROM_RNA_POLY    | 0.72 | 0.1  | 0 | 0 | 0 | not significant |
| 6508 | GO_PEPTIDYL_LYSINE_HYDROXYLTATION                                   | 0.72 | 0.1  | 0 | 0 | 0 | not significant |
| 6509 | GO_POSITIVE_REGULATION_OF_METALLOPEPTIDASE_ACTIVITY                 | 0.72 | 0.1  | 0 | 0 | 0 | not significant |
| 6510 | TAGHAVI_NEOPLASTIC_TRANSFORMATION                                   | 0.72 | 0.1  | 0 | 0 | 0 | not significant |
| 6511 | GO_CELLULAR_RESPONSE_TO_INTERFERON_BETA                             | 0.72 | 0.09 | 0 | 0 | 0 | not significant |
| 6512 | GO_PRENYLTRANSFERASE_ACTIVITY                                       | 0.72 | 0.09 | 0 | 0 | 0 | not significant |
| 6513 | GO_REGULATION_OF_ISOTYPE_SWITCHING_TO_IGE_ISOTYPES                  | 0.72 | 0.09 | 0 | 0 | 0 | not significant |
| 6514 | GO_REGULATION_OF_MICROTUBULE_DEPOLYMERIZATION                       | 0.72 | 0.09 | 0 | 0 | 0 | not significant |
| 6515 | GO_REGULATION_OF_PEROXISOME_PROLIFERATOR_ACTIVATED_RECEPTOR_SIG     | 0.72 | 0.09 | 0 | 0 | 0 | not significant |
| 6516 | GO_WNT_SIGNALOSOME                                                  | 0.72 | 0.09 | 0 | 0 | 0 | not significant |
| 6517 | ZHOU_CELL_CYCLE_GENES_IN_IR_RESPONSE_2HR                            | 0.72 | 0.09 | 0 | 0 | 0 | not significant |
| 6518 | GO_ANTIMICROBIAL_HUMORAL_IMMUNE_RESPONSE_MEDIATED_BY_ANTIMICROBIAI  | 0.72 | 0.08 | 0 | 0 | 0 | not significant |
| 6519 | GO_PYRUVATE_METABOLIC_PROCESS                                       | 0.72 | 0.08 | 0 | 0 | 0 | not significant |
| 6520 | GO_REGULATION_OF_HETEROTYPIC_CELL_CELL_ADHESION                     | 0.72 | 0.08 | 0 | 0 | 0 | not significant |
| 6521 | GO_TRANSFORMING_GROWTH_FACTOR_BETA_BINDING                          | 0.72 | 0.08 | 0 | 0 | 0 | not significant |
| 6522 | HASLINGER_B_CLL_WITH_11Q23_DELETION                                 | 0.72 | 0.08 | 0 | 0 | 0 | not significant |
| 6523 | REACTOME_DISEASES_ASSOCIATED_WITH_N_GLYCOSYLATION_OF_PROTEINS       | 0.72 | 0.08 | 0 | 0 | 0 | not significant |
| 6524 | REACTOME_NUCLEAR_ENVELOPE_REASSEMBLY                                | 0.72 | 0.08 | 0 | 0 | 0 | not significant |
| 6525 | CHR6Q22                                                             | 0.72 | 0.07 | 0 | 0 | 0 | not significant |
| 6526 | GO_AXON_REGENERATION                                                | 0.72 | 0.07 | 0 | 0 | 0 | not significant |
| 6527 | GO_DNA_REPLICATION_DEPENDENT_NUCLEOSOME_ORGANIZATION                | 0.72 | 0.07 | 0 | 0 | 0 | not significant |
| 6528 | GO_POSITIVE_REGULATION_OF_GLYCOPROTEIN_BIOSYNTHETIC_PROCESS         | 0.72 | 0.07 | 0 | 0 | 0 | not significant |



|      |                                                                           |      |      |   |   |   |                 |
|------|---------------------------------------------------------------------------|------|------|---|---|---|-----------------|
| 6529 | GO_PROTEIN_LOCALIZATION_TO_POSTSYNAPTIC_MEMBRANE                          | 0.72 | 0.07 | 0 | 0 | 0 | not significant |
| 6530 | KORKOLA_YOLK_SAC_TUMOR                                                    | 0.72 | 0.07 | 0 | 0 | 0 | not significant |
| 6531 | GO_HISTONE_H3_K9_METHYLATION                                              | 0.72 | 0.06 | 0 | 0 | 0 | not significant |
| 6532 | GO_LYSOSOME_LOCALIZATION                                                  | 0.72 | 0.06 | 0 | 0 | 0 | not significant |
| 6533 | GO_OUTFLOW_TRACT_MORPHOGENESIS                                            | 0.72 | 0.06 | 0 | 0 | 0 | not significant |
| 6534 | KYNG_DNA_DAMAGE_BY_4NQO_OR_UV                                             | 0.72 | 0.06 | 0 | 0 | 0 | not significant |
| 6535 | PID_HIV_NEF_PATHWAY                                                       | 0.72 | 0.06 | 0 | 0 | 0 | not significant |
| 6536 | COATES_MACROPHAGE_M1_VS_M2_UP                                             | 0.72 | 0.05 | 0 | 0 | 0 | not significant |
| 6537 | GO_VIRION_ASSEMBLY                                                        | 0.72 | 0.05 | 0 | 0 | 0 | not significant |
| 6538 | SIG_BCR_SIGNALING_PATHWAY                                                 | 0.72 | 0.05 | 0 | 0 | 0 | not significant |
| 6539 | CHR2Q11                                                                   | 0.72 | 0.04 | 0 | 0 | 0 | not significant |
| 6540 | GO_BONE_MORPHOGENESIS                                                     | 0.72 | 0.04 | 0 | 0 | 0 | not significant |
| 6541 | GO_CYSTEINE_TYPE_ENDOPEPTIDASE_ACTIVITY                                   | 0.72 | 0.04 | 0 | 0 | 0 | not significant |
| 6542 | GO_AEROBIC_RESPIRATION                                                    | 0.72 | 0.03 | 0 | 0 | 0 | not significant |
| 6543 | GO_INDOLE_CONTAINING_COMPOUND_METABOLIC_PROCESS                           | 0.73 | 0.12 | 0 | 0 | 0 | not significant |
| 6544 | GO_ALPHA_CATENIN_BINDING                                                  | 0.73 | 0.11 | 0 | 0 | 0 | not significant |
| 6545 | GO_FOREBRAIN_REGIONALIZATION                                              | 0.73 | 0.11 | 0 | 0 | 0 | not significant |
| 6546 | GO_NEGATIVE_REGULATION_OF_MEMBRANE_POTENTIAL                              | 0.73 | 0.11 | 0 | 0 | 0 | not significant |
| 6547 | GO_REGULATION_OF_DEVELOPMENT_HETEROCHRONIC                                | 0.73 | 0.11 | 0 | 0 | 0 | not significant |
| 6548 | GO_TYPE_I_TRANSFORMING_GROWTH_FACTOR_BETA_RECEPTOR_BINDING                | 0.73 | 0.11 | 0 | 0 | 0 | not significant |
| 6549 | BIOCARTA_HBX_PATHWAY                                                      | 0.73 | 0.1  | 0 | 0 | 0 | not significant |
| 6550 | CHRXQ25                                                                   | 0.73 | 0.1  | 0 | 0 | 0 | not significant |
| 6551 | GO_FATTY_ACID_BETA_OXIDATION_USING_ACYL_COA_DEHYDROGENASE                 | 0.73 | 0.1  | 0 | 0 | 0 | not significant |
| 6552 | GO_NEGATIVE_REGULATION_OF_ALPHA_BETA_T_CELL_DIFFERENTIATION               | 0.73 | 0.1  | 0 | 0 | 0 | not significant |
| 6553 | GO_POSITIVE_REGULATION_OF_CYTOPLASMIC_MRNA_PROCESSING_BODY_ASSEMBLY       | 0.73 | 0.1  | 0 | 0 | 0 | not significant |
| 6554 | GO_POSITIVE_REGULATION_OF_RECEPTOR_BINDING                                | 0.73 | 0.1  | 0 | 0 | 0 | not significant |
| 6555 | GO_REGULATION_OF_DOUBLE_STRAND_BREAK_REPAIR_VIA_NONHOMOLOGOUS_END_JOINING | 0.73 | 0.1  | 0 | 0 | 0 | not significant |
| 6556 | GO_REGULATION_OF_SENSORY_PERCEPTION                                       | 0.73 | 0.1  | 0 | 0 | 0 | not significant |
| 6557 | GO_SYNAPTIC_CLEFT                                                         | 0.73 | 0.1  | 0 | 0 | 0 | not significant |
| 6558 | GO_CUL4_RING_E3_UBIQUITIN_LIGASE_COMPLEX                                  | 0.73 | 0.09 | 0 | 0 | 0 | not significant |
| 6559 | GO_MICROTUBULE_MINUS_END                                                  | 0.73 | 0.09 | 0 | 0 | 0 | not significant |
| 6560 | GO_NEGATIVE_REGULATION_OF_HISTONE_H3_K9_TRIMETHYLATION                    | 0.73 | 0.09 | 0 | 0 | 0 | not significant |
| 6561 | GO_NUCLEOTIDE_EXCISION_REPAIR_COMPLEX                                     | 0.73 | 0.09 | 0 | 0 | 0 | not significant |
| 6562 | GO_PROTEIN_KINASE_A_SIGNALING                                             | 0.73 | 0.09 | 0 | 0 | 0 | not significant |
| 6563 | GO_PROTEIN_LOCALIZATION_TO_ENDOSOME                                       | 0.73 | 0.09 | 0 | 0 | 0 | not significant |
| 6564 | GO_REGULATION_OF_PROTEIN_K63_LINKED_UBIQUITINATION                        | 0.73 | 0.09 | 0 | 0 | 0 | not significant |
| 6565 | GO_REGULATION_OF_VITAMIN_METABOLIC_PROCESS                                | 0.73 | 0.09 | 0 | 0 | 0 | not significant |
| 6566 | GO_UBIQUITIN_LIKE_MODIFIER_ACTIVATING_ENZYME_ACTIVITY                     | 0.73 | 0.09 | 0 | 0 | 0 | not significant |
| 6567 | CHR12Q14                                                                  | 0.73 | 0.08 | 0 | 0 | 0 | not significant |
| 6568 | GO_BETA_CATENIN_DESTRUCTION_COMPLEX_DISASSEMBLY                           | 0.73 | 0.08 | 0 | 0 | 0 | not significant |
| 6569 | GO_DETERMINATION_OF_ADULT_LIFESPAN                                        | 0.73 | 0.08 | 0 | 0 | 0 | not significant |
| 6570 | GO_PHOTORECEPTOR_CONNECTING_CILIUM                                        | 0.73 | 0.08 | 0 | 0 | 0 | not significant |
| 6571 | GO_POSITIVE_REGULATION_OF_NEUROTRANSMITTER_TRANSPORT                      | 0.73 | 0.08 | 0 | 0 | 0 | not significant |
| 6572 | GO_PROTEIN_SERINE_THREONINE_KINASE_INHIBITOR_ACTIVITY                     | 0.73 | 0.08 | 0 | 0 | 0 | not significant |
| 6573 | GO_QUATERNARY_AMMONIUM_GROUP_BINDING                                      | 0.73 | 0.08 | 0 | 0 | 0 | not significant |
| 6574 | JIANG_AGING_CEREBRAL_CORTEX_UP                                            | 0.73 | 0.08 | 0 | 0 | 0 | not significant |
| 6575 | PID_EPHA2_FWD_PATHWAY                                                     | 0.73 | 0.08 | 0 | 0 | 0 | not significant |
| 6576 | REACTOME_ADVANCED_GLYCOSYLATION_ENDPRODUCT_RECEPTOR_SIGNALING             | 0.73 | 0.08 | 0 | 0 | 0 | not significant |
| 6577 | REACTOME_E2F_MEDIATED_REGULATION_OF_DNA_REPLICATION                       | 0.73 | 0.08 | 0 | 0 | 0 | not significant |
| 6578 | REACTOME_SYNTHESIS_OF_IP3_AND_IP4_IN_THE_CYTOSOL                          | 0.73 | 0.08 | 0 | 0 | 0 | not significant |
| 6579 | REACTOME_TRANSCRIPTION_OF_E2F_TARGETS_UNDER_NEGATIVE_CONTROL_BY_TFID      | 0.73 | 0.08 | 0 | 0 | 0 | not significant |
| 6580 | DIRMEIER_LMP1_RESPONSE_LATE_DN                                            | 0.73 | 0.07 | 0 | 0 | 0 | not significant |
| 6581 | GO_CEREBRAL_CORTEX_CELL_MIGRATION                                         | 0.73 | 0.07 | 0 | 0 | 0 | not significant |
| 6582 | GO_POSTSYNAPTIC_DENSITY_MEMBRANE                                          | 0.73 | 0.07 | 0 | 0 | 0 | not significant |
| 6583 | GO_REGULATION_OF_VACUOLE_ORGANIZATION                                     | 0.73 | 0.07 | 0 | 0 | 0 | not significant |
| 6584 | GO_VASCULAR_ENDOTHELIAL_GROWTH_FACTOR_PRODUCTION                          | 0.73 | 0.07 | 0 | 0 | 0 | not significant |
| 6585 | GO_VENTRICULAR_SEPTUM_DEVELOPMENT                                         | 0.73 | 0.07 | 0 | 0 | 0 | not significant |
| 6586 | GO_VOLTAGE_GATED_POTASSIUM_CHANNEL_ACTIVITY                               | 0.73 | 0.07 | 0 | 0 | 0 | not significant |
| 6587 | REACTOME_MITOCHONDRIAL_FATTY_ACID_BETA_OXIDATION                          | 0.73 | 0.07 | 0 | 0 | 0 | not significant |
| 6588 | RIGGINS_TAMOXIFEN_RESISTANCE_UP                                           | 0.73 | 0.07 | 0 | 0 | 0 | not significant |
| 6589 | CHR18P11                                                                  | 0.73 | 0.06 | 0 | 0 | 0 | not significant |
| 6590 | GO_MITOCHONDRIAL_FISSION                                                  | 0.73 | 0.06 | 0 | 0 | 0 | not significant |
| 6591 | GO_NEGATIVE_REGULATION_OF_ACTIN_FILAMENT_POLYMERIZATION                   | 0.73 | 0.06 | 0 | 0 | 0 | not significant |
| 6592 | GO_TRICARBOXYLIC_ACID_CYCLE                                               | 0.73 | 0.06 | 0 | 0 | 0 | not significant |
| 6593 | BROWNE_HCMV_INFECTION_20HR_DN                                             | 0.73 | 0.05 | 0 | 0 | 0 | not significant |
| 6594 | GO_MYELOID_CELL_DEVELOPMENT                                               | 0.73 | 0.05 | 0 | 0 | 0 | not significant |
| 6595 | GO_REGULATION_OF_DENDRITIC_SPINE_DEVELOPMENT                              | 0.73 | 0.05 | 0 | 0 | 0 | not significant |
| 6596 | GO_SEQUESTERING_OF_CALCIIUM_ION                                           | 0.73 | 0.04 | 0 | 0 | 0 | not significant |
| 6597 | PID_MET_PATHWAY                                                           | 0.73 | 0.04 | 0 | 0 | 0 | not significant |
| 6598 | GINESTIER_BREAST_CANCER_20Q13_AMPLIFICATION_UP                            | 0.73 | 0.03 | 0 | 0 | 0 | not significant |
| 6599 | GO_CARDIAC_SEPTUM_DEVELOPMENT                                             | 0.73 | 0.03 | 0 | 0 | 0 | not significant |
| 6600 | GO_CARTILAGE_DEVELOPMENT                                                  | 0.73 | 0.03 | 0 | 0 | 0 | not significant |
| 6601 | GO_TRANSITION_METAL_ION_TRANSPORT                                         | 0.73 | 0.03 | 0 | 0 | 0 | not significant |
| 6602 | REACTOME_MUSCLE_CONTRACTION                                               | 0.73 | 0.03 | 0 | 0 | 0 | not significant |
| 6603 | GO_RAS_GUANYL_NUCLEOTIDE_EXCHANGE_FACTOR_ACTIVITY                         | 0.73 | 0.02 | 0 | 0 | 0 | not significant |
| 6604 | GO_ACTIN_FILAMENT_POLYMERIZATION                                          | 0.73 | 0.01 | 0 | 0 | 0 | not significant |
| 6605 | GO_ACTIN_POLYMERIZATION_OR_DEPOLYMERIZATION                               | 0.73 | 0.01 | 0 | 0 | 0 | not significant |
| 6606 | GO_INOSITOL_TRISPHOSPHATE_PHOSPHATASE_ACTIVITY                            | 0.74 | 0.12 | 0 | 0 | 0 | not significant |
| 6607 | GO_VESICLE_UNCOATING                                                      | 0.74 | 0.12 | 0 | 0 | 0 | not significant |
| 6608 | GO_FILOPODIUM_TIP                                                         | 0.74 | 0.11 | 0 | 0 | 0 | not significant |
| 6609 | GO_HISTONE_METHYLTRANSFERASE_ACTIVITY_H3_K9_SPECIFIC_                     | 0.74 | 0.11 | 0 | 0 | 0 | not significant |
| 6610 | GO_NADP_RETINOL_DEHYDROGENASE_ACTIVITY                                    | 0.74 | 0.11 | 0 | 0 | 0 | not significant |
| 6611 | GO_NODAL_SIGNALING_PATHWAY                                                | 0.74 | 0.11 | 0 | 0 | 0 | not significant |
| 6612 | GO_REGULATION_OF_CYTOPLASMIC_TRANSLATIONAL_INITIATION                     | 0.74 | 0.11 | 0 | 0 | 0 | not significant |
| 6613 | GO_REGULATION_OF_PROTEIN_GLYCOSYLATION                                    | 0.74 | 0.11 | 0 | 0 | 0 | not significant |
| 6614 | BIOCARTA_CTLA4_PATHWAY                                                    | 0.74 | 0.1  | 0 | 0 | 0 | not significant |
| 6615 | CHR19Q12                                                                  | 0.74 | 0.1  | 0 | 0 | 0 | not significant |
| 6616 | GO_CATECHOLAMINE_SECRETION                                                | 0.74 | 0.1  | 0 | 0 | 0 | not significant |
| 6617 | GO_DEATH_INDUCING_SIGNALING_COMPLEX_ASSEMBLY                              | 0.74 | 0.1  | 0 | 0 | 0 | not significant |
| 6618 | GO_HISTONE_DEMETHYLASE_ACTIVITY_H3_K9_SPECIFIC_                           | 0.74 | 0.1  | 0 | 0 | 0 | not significant |
| 6619 | GO_NEURONAL_ION_CHANNEL_CLUSTERING                                        | 0.74 | 0.1  | 0 | 0 | 0 | not significant |
| 6620 | GO_NPBAF_COMPLEX                                                          | 0.74 | 0.1  | 0 | 0 | 0 | not significant |
| 6621 | GO_REGULATION_OF_METALLOENDOPEPTIDASE_ACTIVITY                            | 0.74 | 0.1  | 0 | 0 | 0 | not significant |
| 6622 | REACTOME_VOLTAGE_GATED_POTASSIUM_CHANNELS                                 | 0.74 | 0.1  | 0 | 0 | 0 | not significant |
| 6623 | GO_COLLECTING_DUCT_DEVELOPMENT                                            | 0.74 | 0.09 | 0 | 0 | 0 | not significant |
| 6624 | GO_ENERGY_HOMEOSTASIS                                                     | 0.74 | 0.09 | 0 | 0 | 0 | not significant |
| 6625 | GO_ENTEROENDOCRINE_CELL_DIFFERENTIATION                                   | 0.74 | 0.09 | 0 | 0 | 0 | not significant |
| 6626 | GO_INACTIVATION_OF_MAPK_ACTIVITY                                          | 0.74 | 0.09 | 0 | 0 | 0 | not significant |
| 6627 | GO_METALLOAMINOPEPTIDASE_ACTIVITY                                         | 0.74 | 0.09 | 0 | 0 | 0 | not significant |
| 6628 | GO_MICROTUBULE_SEVERING                                                   | 0.74 | 0.09 | 0 | 0 | 0 | not significant |
| 6629 | GO_NAD_METABOLIC_PROCESS                                                  | 0.74 | 0.09 | 0 | 0 | 0 | not significant |
| 6630 | GO_NEGATIVE_REGULATION_OF_CD4_POSITIVE_ALPHA_BETA_T_CELL_DIFFERENTIATION  | 0.74 | 0.09 | 0 | 0 | 0 | not significant |
| 6631 | GO_ORGANOPHOSPHATE_ESTER_TRANSMEMBRANE_TRANSPORTER_ACTIVITY               | 0.74 | 0.09 | 0 | 0 | 0 | not significant |
| 6632 | GO_REGULATION_OF_EARLY_ENDOSOME_TO_LATE_ENDOSOME_TRANSPORT                | 0.74 | 0.09 | 0 | 0 | 0 | not significant |
| 6633 | HAHTOLA_MYCOSIS_FUNGOIDES_DN                                              | 0.74 | 0.09 | 0 | 0 | 0 | not significant |
| 6634 | REACTOME_SUMOYLATION_OF_TRANSCRIPTION_FACTORS                             | 0.74 | 0.09 | 0 | 0 | 0 | not significant |
| 6635 | GO_NEGATIVE_REGULATION_OF_COLD_INDUCED_THERMOGENESIS                      | 0.74 | 0.08 | 0 | 0 | 0 | not significant |
| 6636 | GO_RESPONSE_TO_X_RAY                                                      | 0.74 | 0.08 | 0 | 0 | 0 | not significant |
| 6637 | LEIN_LOCALIZED_TO_PROXIMAL_DENDRITES                                      | 0.74 | 0.08 | 0 | 0 | 0 | not significant |

|      |                                                                      |      |      |   |   |   |                 |
|------|----------------------------------------------------------------------|------|------|---|---|---|-----------------|
| 6638 | PID_ER_NONGENOMIC_PATHWAY                                            | 0.74 | 0.08 | 0 | 0 | 0 | not significant |
| 6639 | REACTOME_BRANCHED_CHAIN_AMINO_ACID_CATABOLISM                        | 0.74 | 0.08 | 0 | 0 | 0 | not significant |
| 6640 | REACTOME_TAK1_ACTIVATES_NFKB_BY_PHOSPHORYLATION_AND_ACTIVATION_O     | 0.74 | 0.08 | 0 | 0 | 0 | not significant |
| 6641 | HEIDENBLAD_AMPLICON_8Q24_DN                                          | 0.74 | 0.07 | 0 | 0 | 0 | not significant |
| 6642 | REACTOME_ECM_PROTEOGLYCANS                                           | 0.74 | 0.07 | 0 | 0 | 0 | not significant |
| 6643 | WOOD_EBV_EBNA1_TARGETS_DN                                            | 0.74 | 0.07 | 0 | 0 | 0 | not significant |
| 6644 | GO_KINASE_INHIBITOR_ACTIVITY                                         | 0.74 | 0.06 | 0 | 0 | 0 | not significant |
| 6645 | GO_PROTEIN_LOCALIZATION_TO_CELL_SURFACE                              | 0.74 | 0.06 | 0 | 0 | 0 | not significant |
| 6646 | GO_REGULATION_OF_CALCIIUM_ION_TRANSPORT_INTO_CYTOSOL                 | 0.74 | 0.06 | 0 | 0 | 0 | not significant |
| 6647 | GO_TRANSFERASE_ACTIVITY_TRANSFERRING_PENTOSYL_GROUPS                 | 0.74 | 0.06 | 0 | 0 | 0 | not significant |
| 6648 | HEIDENBLAD_AMPLICON_8Q24_UP                                          | 0.74 | 0.06 | 0 | 0 | 0 | not significant |
| 6649 | GO_POSITIVE_REGULATION_OF_PROTEIN_BINDING                            | 0.74 | 0.05 | 0 | 0 | 0 | not significant |
| 6650 | GO_MOTILE_CILIUM                                                     | 0.74 | 0.04 | 0 | 0 | 0 | not significant |
| 6651 | GO_NEGATIVE_REGULATION_OF_CELLULAR_PROTEIN_LOCALIZATION              | 0.74 | 0.04 | 0 | 0 | 0 | not significant |
| 6652 | GO_NEGATIVE_REGULATION_OF_CYTOSKELETON_ORGANIZATION                  | 0.74 | 0.03 | 0 | 0 | 0 | not significant |
| 6653 | GO_UBIQUITIN_LIKE_PROTEIN_LIGASE_ACTIVITY                            | 0.74 | 0.02 | 0 | 0 | 0 | not significant |
| 6654 | GO_PROTEIN_TARGETING                                                 | 0.74 | 0    | 0 | 0 | 0 | not significant |
| 6655 | GO_AUDITORY_RECEPTOR_CELL_MORPHOGENESIS                              | 0.75 | 0.13 | 0 | 0 | 0 | not significant |
| 6656 | GO_ACTIN_POLYMERIZATION_DEPENDENT_CELL_MOTILITY                      | 0.75 | 0.12 | 0 | 0 | 0 | not significant |
| 6657 | GO_CELL_SURFACE_RECEPTOR_SIGNALING_PATHWAY_INVOLVED_IN_HEART_DEV     | 0.75 | 0.12 | 0 | 0 | 0 | not significant |
| 6658 | GO_CLATHRIN_HEAVY_CHAIN_BINDING                                      | 0.75 | 0.12 | 0 | 0 | 0 | not significant |
| 6659 | GO_REGULATION_OF_MICROTUBULE_NUCLEATION                              | 0.75 | 0.12 | 0 | 0 | 0 | not significant |
| 6660 | GO_RNA_POLYMERASE_III_TYPE_1_PROMOTER_DNA_BINDING                    | 0.75 | 0.12 | 0 | 0 | 0 | not significant |
| 6661 | IKEDA_MIR30_TARGETS_DN                                               | 0.75 | 0.12 | 0 | 0 | 0 | not significant |
| 6662 | BUDHU_LIVER_CANCER_METASTASIS_UP                                     | 0.75 | 0.11 | 0 | 0 | 0 | not significant |
| 6663 | FARMER_BREAST_CANCER_CLUSTER_4                                       | 0.75 | 0.11 | 0 | 0 | 0 | not significant |
| 6664 | GO_CELL_DIFFERENTIATION_IN_HINDBRAIN                                 | 0.75 | 0.11 | 0 | 0 | 0 | not significant |
| 6665 | GO_CHLORIDE_ION_BINDING                                              | 0.75 | 0.11 | 0 | 0 | 0 | not significant |
| 6666 | GO_ENDOCARDIAL_CUSHION_MORPHOGENESIS                                 | 0.75 | 0.11 | 0 | 0 | 0 | not significant |
| 6667 | GO_INTRACILIARY_TRANSPORT_PARTICLE_A                                 | 0.75 | 0.11 | 0 | 0 | 0 | not significant |
| 6668 | GO_NEGATIVE_REGULATION_OF_ENDOPLASMIC_RETICULUM_CALCIIUM_ION_CONC    | 0.75 | 0.11 | 0 | 0 | 0 | not significant |
| 6669 | GO_NEGATIVE_REGULATION_OF_RHO_PROTEIN_SIGNAL_TRANSDUCTION            | 0.75 | 0.11 | 0 | 0 | 0 | not significant |
| 6670 | GO_REGULATION_OF_ANIMAL_ORGAN_FORMATION                              | 0.75 | 0.11 | 0 | 0 | 0 | not significant |
| 6671 | GO_REGULATION_OF STEM_CELL_POPULATION_MAINTENANCE                    | 0.75 | 0.11 | 0 | 0 | 0 | not significant |
| 6672 | GO_TRANSLATIONAL_READTHROUGH                                         | 0.75 | 0.11 | 0 | 0 | 0 | not significant |
| 6673 | GO_VESICLE_TETHERING                                                 | 0.75 | 0.11 | 0 | 0 | 0 | not significant |
| 6674 | REACTOME_CD209_DC_SIGN_SIGNALING                                     | 0.75 | 0.11 | 0 | 0 | 0 | not significant |
| 6675 | REACTOME_CELLULAR_HEXOSE_TRANSPORT                                   | 0.75 | 0.11 | 0 | 0 | 0 | not significant |
| 6676 | REACTOME_DOWNREGULATION_OF_ERBB2:ERBB3_SIGNALING                     | 0.75 | 0.11 | 0 | 0 | 0 | not significant |
| 6677 | REACTOME_TRIF_MEDIATED_PROGRAMMED_CELL_DEATH                         | 0.75 | 0.11 | 0 | 0 | 0 | not significant |
| 6678 | BIOCARTA_PRC2_PATHWAY                                                | 0.75 | 0.1  | 0 | 0 | 0 | not significant |
| 6679 | BIOCARTA_PTEN_PATHWAY                                                | 0.75 | 0.1  | 0 | 0 | 0 | not significant |
| 6680 | GO_AMINO_SUGAR_BIOSYNTHETIC_PROCESS                                  | 0.75 | 0.1  | 0 | 0 | 0 | not significant |
| 6681 | GO_COLLAGEN_FIBRIL_ORGANIZATION                                      | 0.75 | 0.1  | 0 | 0 | 0 | not significant |
| 6682 | GO_DEOXYRIBOSE_PHOSPHATE_BIOSYNTHETIC_PROCESS                        | 0.75 | 0.1  | 0 | 0 | 0 | not significant |
| 6683 | GO_ESTABLISHMENT_OF_PROTEIN_LOCALIZATION_TO_POSTSYNAPTIC_MEMBRAN     | 0.75 | 0.1  | 0 | 0 | 0 | not significant |
| 6684 | GO_MESENCHYME_MORPHOGENESIS                                          | 0.75 | 0.1  | 0 | 0 | 0 | not significant |
| 6685 | GO_MITOTIC_DNA_REPLICATION                                           | 0.75 | 0.1  | 0 | 0 | 0 | not significant |
| 6686 | GO_RESPONSE_TO_ATP                                                   | 0.75 | 0.1  | 0 | 0 | 0 | not significant |
| 6687 | REACTOME_PHASE_0_RAPID_DEPOLARISATION                                | 0.75 | 0.1  | 0 | 0 | 0 | not significant |
| 6688 | CHR4P14                                                              | 0.75 | 0.09 | 0 | 0 | 0 | not significant |
| 6689 | GO_NCRNA_CATABOLIC_PROCESS                                           | 0.75 | 0.09 | 0 | 0 | 0 | not significant |
| 6690 | GO_NUCLEOSIDE_SALVAGE                                                | 0.75 | 0.09 | 0 | 0 | 0 | not significant |
| 6691 | GO_PHOSPHATIDIC_ACID_BIOSYNTHETIC_PROCESS                            | 0.75 | 0.09 | 0 | 0 | 0 | not significant |
| 6692 | GO_REGULATION_OF_NEUROBLAST_PROLIFERATION                            | 0.75 | 0.09 | 0 | 0 | 0 | not significant |
| 6693 | REACTOME_ELASTIC_FIBRE_FORMATION                                     | 0.75 | 0.09 | 0 | 0 | 0 | not significant |
| 6694 | GO_G2_DNA_DAMAGE_CHECKPOINT                                          | 0.75 | 0.08 | 0 | 0 | 0 | not significant |
| 6695 | GO_MYD88_INDEPENDENT_TOLL_LIKE_RECEPTOR_SIGNALING_PATHWAY            | 0.75 | 0.08 | 0 | 0 | 0 | not significant |
| 6696 | GO_REGULATION_OF_LIPID_CATABOLIC_PROCESS                             | 0.75 | 0.08 | 0 | 0 | 0 | not significant |
| 6697 | GO_RESPONSE_TO_EPIDERMAL_GROWTH_FACTOR                               | 0.75 | 0.08 | 0 | 0 | 0 | not significant |
| 6698 | HUMMEL_BURKITT'S_LYMPHOMA_UP                                         | 0.75 | 0.08 | 0 | 0 | 0 | not significant |
| 6699 | MARTIN_VIRAL_GPCR_SIGNALING_DN                                       | 0.75 | 0.08 | 0 | 0 | 0 | not significant |
| 6700 | REACTOME_REGULATION_OF_RUNX1_EXPRESSION_AND_ACTIVITY                 | 0.75 | 0.08 | 0 | 0 | 0 | not significant |
| 6701 | GO_MESODERM_MORPHOGENESIS                                            | 0.75 | 0.07 | 0 | 0 | 0 | not significant |
| 6702 | GO_POSITIVE_REGULATION_OF_NEURON_APOPTOTIC_PROCESS                   | 0.75 | 0.07 | 0 | 0 | 0 | not significant |
| 6703 | GO_REGULATION_OF_RELEASE_OF_SEQUESTERED_CALCIIUM_ION_INTO_CYTOSO     | 0.75 | 0.07 | 0 | 0 | 0 | not significant |
| 6704 | CHR3P22                                                              | 0.75 | 0.06 | 0 | 0 | 0 | not significant |
| 6705 | PKCA_DN.V1_UP                                                        | 0.75 | 0.06 | 0 | 0 | 0 | not significant |
| 6706 | GO_HISTONE_METHYLTRANSFERASE_COMPLEX                                 | 0.75 | 0.04 | 0 | 0 | 0 | not significant |
| 6707 | GO_MEMBRANE_FUSION                                                   | 0.75 | 0.03 | 0 | 0 | 0 | not significant |
| 6708 | REACTOME_G2_M_DNA_DAMAGE_CHECKPOINT                                  | 0.75 | 0.03 | 0 | 0 | 0 | not significant |
| 6709 | CHR3P21                                                              | 0.75 | 0.02 | 0 | 0 | 0 | not significant |
| 6710 | GO_UBIQUITIN_LIKE_PROTEIN_TRANSFERASE_ACTIVITY                       | 0.75 | 0.01 | 0 | 0 | 0 | not significant |
| 6711 | GO_ANCHORING_JUNCTION                                                | 0.75 | 0    | 0 | 0 | 0 | not significant |
| 6712 | GO_NEUROTRANSMITTER_RECEPTOR_LOCALIZATION_TO_POSTSYNAPTIC_SPECIA     | 0.76 | 0.14 | 0 | 0 | 0 | not significant |
| 6713 | GO_CELLULAR_RESPONSE_TO_INCREASED_OXYGEN_LEVELS                      | 0.76 | 0.13 | 0 | 0 | 0 | not significant |
| 6714 | GO_REGULATION_OF_CILIIUM_BEAT_FREQUENCY_INVOLVED_IN_CILIARY_MOTILITY | 0.76 | 0.13 | 0 | 0 | 0 | not significant |
| 6715 | GO_REGULATION_OF_PROTEIN_COMPLEX_STABILITY                           | 0.76 | 0.13 | 0 | 0 | 0 | not significant |
| 6716 | GO_VENTRICULAR_CARDIAC_MUSCLE_CELL_MEMBRANE_REPOLARIZATION           | 0.76 | 0.13 | 0 | 0 | 0 | not significant |
| 6717 | PIEPOLL_LG11_TARGETS_DN                                              | 0.76 | 0.13 | 0 | 0 | 0 | not significant |
| 6718 | GO_C4_DICARBOXYLATE_TRANSPORT                                        | 0.76 | 0.12 | 0 | 0 | 0 | not significant |
| 6719 | GO_CALCIIUM_ION_REGULATED_EXOCYTOSIS_OF_NEUROTRANSMITTER             | 0.76 | 0.12 | 0 | 0 | 0 | not significant |
| 6720 | GO_MULTI_ORGANISM_MEMBRANE_ORGANIZATION                              | 0.76 | 0.12 | 0 | 0 | 0 | not significant |
| 6721 | GO_POSITIVE_REGULATION_OF_STEROID_BIOSYNTHETIC_PROCESS               | 0.76 | 0.12 | 0 | 0 | 0 | not significant |
| 6722 | GO_PRO_B_CELL_DIFFERENTIATION                                        | 0.76 | 0.12 | 0 | 0 | 0 | not significant |
| 6723 | GO_REGULATION_OF_CARDIAC_MUSCLE_ADAPTATION                           | 0.76 | 0.12 | 0 | 0 | 0 | not significant |
| 6724 | GO_TELOMERE_LOCALIZATION                                             | 0.76 | 0.12 | 0 | 0 | 0 | not significant |
| 6725 | MCGARVEY_SILENCED_BY_METHYLATION_IN_COLON_CANCER                     | 0.76 | 0.12 | 0 | 0 | 0 | not significant |
| 6726 | SHIRAIISHI_PLZF_TARGETS_DN                                           | 0.76 | 0.12 | 0 | 0 | 0 | not significant |
| 6727 | VANDESLUIS_COMMD1_TARGETS_GROUP_3_DN                                 | 0.76 | 0.12 | 0 | 0 | 0 | not significant |
| 6728 | GO_C_TERMINAL_PROTEIN_AMINO_ACID_MODIFICATION                        | 0.76 | 0.11 | 0 | 0 | 0 | not significant |
| 6729 | GO_PHOSPHATIDYLINOSITOL_3_KINASE_COMPLEX_CLASS_I                     | 0.76 | 0.11 | 0 | 0 | 0 | not significant |
| 6730 | GO_POSITIVE_REGULATION_OF_POTASSIUM_ION_TRANSMEMBRANE_TRANSPORT      | 0.76 | 0.11 | 0 | 0 | 0 | not significant |
| 6731 | GO_POSITIVE_REGULATION_OF_STEROID_METABOLIC_PROCESS                  | 0.76 | 0.11 | 0 | 0 | 0 | not significant |
| 6732 | GO_TRANSCRIPTION_COACTIVATOR_BINDING                                 | 0.76 | 0.11 | 0 | 0 | 0 | not significant |
| 6733 | LI_ADIPOGENESIS_BY_ACTIVATED_PPARG                                   | 0.76 | 0.11 | 0 | 0 | 0 | not significant |
| 6734 | MOOTHA_ROS                                                           | 0.76 | 0.11 | 0 | 0 | 0 | not significant |
| 6735 | REACTOME_DISEASES_OF_MISMATCH_REPAIR_MMR                             | 0.76 | 0.11 | 0 | 0 | 0 | not significant |
| 6736 | WONG_ENDOMETRIUM_CANCER_DN                                           | 0.76 | 0.11 | 0 | 0 | 0 | not significant |
| 6737 | BIOCARTA_ATM_PATHWAY                                                 | 0.76 | 0.1  | 0 | 0 | 0 | not significant |
| 6738 | GO_BRANCHED_CHAIN_AMINO_ACID_CATABOLIC_PROCESS                       | 0.76 | 0.1  | 0 | 0 | 0 | not significant |
| 6739 | GO_MICROTUBULE_ANCHORING                                             | 0.76 | 0.1  | 0 | 0 | 0 | not significant |
| 6740 | GO_MODIFICATION_OF_SYNAPTIC_STRUCTURE                                | 0.76 | 0.1  | 0 | 0 | 0 | not significant |
| 6741 | GO_POSITIVE_REGULATION_OF_NOTCH_SIGNALING_PATHWAY                    | 0.76 | 0.1  | 0 | 0 | 0 | not significant |
| 6742 | KEGG_ALDOSTERONE_REGULATED_SODIUM_REABSORPTION                       | 0.76 | 0.1  | 0 | 0 | 0 | not significant |
| 6743 | PID_ARF_3PATHWAY                                                     | 0.76 | 0.1  | 0 | 0 | 0 | not significant |
| 6744 | REACTOME_AKT_PHOSPHORYLATES_TARGETS_IN_THE_CYTOSOL                   | 0.76 | 0.1  | 0 | 0 | 0 | not significant |
| 6745 | REACTOME_CD28_DEPENDENT_VAV1_PATHWAY                                 | 0.76 | 0.1  | 0 | 0 | 0 | not significant |
| 6746 | REACTOME_TRANSCRIPTIONAL_REGULATION_BY_THE_AP_2_TFAP2_FAMILY_OF_T    | 0.76 | 0.1  | 0 | 0 | 0 | not significant |

|      |                                                                    |      |      |   |   |   |                 |
|------|--------------------------------------------------------------------|------|------|---|---|---|-----------------|
| 6747 | DELASERNA_MYOD_TARGETS_DN                                          | 0.76 | 0.09 | 0 | 0 | 0 | not significant |
| 6748 | GO_ENDOSOME_TRANSPORT_VIA_MULTIVESICULAR_BODY_SORTING_PATHWAY      | 0.76 | 0.09 | 0 | 0 | 0 | not significant |
| 6749 | HASLINGER_B_CELL_WITH_CHROMOSOME_12_TRISOMY                        | 0.76 | 0.09 | 0 | 0 | 0 | not significant |
| 6750 | MATTIOLI_MULTIPLE_MYELOMA_WITH_14Q32_TRANSLOCATIONS                | 0.76 | 0.09 | 0 | 0 | 0 | not significant |
| 6751 | REACTOME_INTERLEUKIN_10_SIGNALING                                  | 0.76 | 0.09 | 0 | 0 | 0 | not significant |
| 6752 | GO_CENTRIOLE_ASSEMBLY                                              | 0.76 | 0.08 | 0 | 0 | 0 | not significant |
| 6753 | GO_DEMETHYLASE_ACTIVITY                                            | 0.76 | 0.08 | 0 | 0 | 0 | not significant |
| 6754 | GO_ENDODERM_FORMATION                                              | 0.76 | 0.08 | 0 | 0 | 0 | not significant |
| 6755 | GO_SEX_CHROMOSOME                                                  | 0.76 | 0.08 | 0 | 0 | 0 | not significant |
| 6756 | CHR11P11                                                           | 0.76 | 0.07 | 0 | 0 | 0 | not significant |
| 6757 | GO_ACTIVATION_OF_CYSINE_TYPE_ENDOPEPTIDASE_ACTIVITY_INVOLVED_IN_A  | 0.76 | 0.07 | 0 | 0 | 0 | not significant |
| 6758 | GO_NEGATIVE_REGULATION_OF_PEPTIDYL_TYROSINE_PHOSPHORYLATION        | 0.76 | 0.07 | 0 | 0 | 0 | not significant |
| 6759 | PID_TXA2PATHWAY                                                    | 0.76 | 0.07 | 0 | 0 | 0 | not significant |
| 6760 | GINESTIER_BREAST_CANCER_ZNF217_AMPLIFIED_UP                        | 0.76 | 0.06 | 0 | 0 | 0 | not significant |
| 6761 | GO_ACTIN_FILAMENT                                                  | 0.76 | 0.06 | 0 | 0 | 0 | not significant |
| 6762 | GO_SNARE_BINDING                                                   | 0.76 | 0.05 | 0 | 0 | 0 | not significant |
| 6763 | GO_CYTOSOLIC_CALCIIUM_ION_TRANSPORT                                | 0.76 | 0.04 | 0 | 0 | 0 | not significant |
| 6764 | GO_SKIN_DEVELOPMENT                                                | 0.76 | 0.04 | 0 | 0 | 0 | not significant |
| 6765 | KEGG_FOCAL_ADHESION                                                | 0.76 | 0.04 | 0 | 0 | 0 | not significant |
| 6766 | GO_TISSUE_HOMEOSTASIS                                              | 0.76 | 0.03 | 0 | 0 | 0 | not significant |
| 6767 | GO_PROTEIN_METHYLATION                                             | 0.76 | 0.02 | 0 | 0 | 0 | not significant |
| 6768 | HOLLMANN_APOPTOSIS_VIA_CD40_UP                                     | 0.76 | 0.02 | 0 | 0 | 0 | not significant |
| 6769 | ABBUD_LIF_SIGNALING_2_UP                                           | 0.77 | 0.13 | 0 | 0 | 0 | not significant |
| 6770 | EHRlich_ICF_SYNDROM_DN                                             | 0.77 | 0.13 | 0 | 0 | 0 | not significant |
| 6771 | GO_AUDITORY_RECEPTOR_CELL_DEVELOPMENT                              | 0.77 | 0.13 | 0 | 0 | 0 | not significant |
| 6772 | GO_MULTI_ORGANISM_MEMBRANE_FUSION                                  | 0.77 | 0.13 | 0 | 0 | 0 | not significant |
| 6773 | GO_REGULATION_OF_DENDRITIC_CELL_CHEMOTAXIS                         | 0.77 | 0.13 | 0 | 0 | 0 | not significant |
| 6774 | GO_REGULATION_OF_FATTY_ACID_BETA_OXIDATION                         | 0.77 | 0.13 | 0 | 0 | 0 | not significant |
| 6775 | GO_REGULATION_OF_HEART_RATE_BY_CHEMICAL_SIGNAL                     | 0.77 | 0.13 | 0 | 0 | 0 | not significant |
| 6776 | GO_REGULATION_OF_SYNAPTIC_VESICLE_ENDOCYTOSIS                      | 0.77 | 0.13 | 0 | 0 | 0 | not significant |
| 6777 | GO_SPHINGOSINE_N_AcylTRANSFERASE_ACTIVITY                          | 0.77 | 0.13 | 0 | 0 | 0 | not significant |
| 6778 | GO_SURFACTANT_HOMEOSTASIS                                          | 0.77 | 0.13 | 0 | 0 | 0 | not significant |
| 6779 | GO_VASCULAR_ENDOTHELIAL_GROWTH_FACTOR_RECEPTOR_2_BINDING           | 0.77 | 0.13 | 0 | 0 | 0 | not significant |
| 6780 | REACTOME_INTERLEUKIN_6_SIGNALING                                   | 0.77 | 0.13 | 0 | 0 | 0 | not significant |
| 6781 | GO_AUDITORY_RECEPTOR_CELL_STEREOCILIIUM_ORGANIZATION               | 0.77 | 0.12 | 0 | 0 | 0 | not significant |
| 6782 | GO_DNA_N_GLYCOSYLASE_ACTIVITY                                      | 0.77 | 0.12 | 0 | 0 | 0 | not significant |
| 6783 | GO_PEPTIDYL_PROLINE_4_DIOXYGENASE_ACTIVITY                         | 0.77 | 0.12 | 0 | 0 | 0 | not significant |
| 6784 | GO_POSITIVE_REGULATION_OF_CYTOKINE_SECRETION_INVOLVED_IN_IMMUNE_RE | 0.77 | 0.12 | 0 | 0 | 0 | not significant |
| 6785 | GO_POSITIVE_REGULATION_OF_LIPOPOLYSACCHARIDE_MEDIATED_SIGNALING_PA | 0.77 | 0.12 | 0 | 0 | 0 | not significant |
| 6786 | GO_REGULATION_OF_BILE_ACID_BIOSYNTHETIC_PROCESS                    | 0.77 | 0.12 | 0 | 0 | 0 | not significant |
| 6787 | GO_REGULATION_OF_CYTOPLASMIC_TRANSPORT                             | 0.77 | 0.12 | 0 | 0 | 0 | not significant |
| 6788 | GO_REPLACEMENT_OSSIFICATION                                        | 0.77 | 0.12 | 0 | 0 | 0 | not significant |
| 6789 | GO_RNA_SURVEILLANCE                                                | 0.77 | 0.12 | 0 | 0 | 0 | not significant |
| 6790 | KEGG_RETINOL_METABOLISM                                            | 0.77 | 0.12 | 0 | 0 | 0 | not significant |
| 6791 | MAEKAWA_ATF2_TARGETS                                               | 0.77 | 0.12 | 0 | 0 | 0 | not significant |
| 6792 | MYLLYKANGAS_AMPLIFICATION_HOT_SPOT_9                               | 0.77 | 0.12 | 0 | 0 | 0 | not significant |
| 6793 | STARK_BRAIN_22Q11_DELETION                                         | 0.77 | 0.12 | 0 | 0 | 0 | not significant |
| 6794 | BIOCARTA_HER2_PATHWAY                                              | 0.77 | 0.11 | 0 | 0 | 0 | not significant |
| 6795 | GO_LATE_ENDOSOME_TO_VACUOLE_TRANSPORT                              | 0.77 | 0.11 | 0 | 0 | 0 | not significant |
| 6796 | GO_LUNG_ALVEOLUS_DEVELOPMENT                                       | 0.77 | 0.11 | 0 | 0 | 0 | not significant |
| 6797 | GO_MICROVILLUS_ORGANIZATION                                        | 0.77 | 0.11 | 0 | 0 | 0 | not significant |
| 6798 | GO_OLIGODENDROCYTE_DEVELOPMENT                                     | 0.77 | 0.11 | 0 | 0 | 0 | not significant |
| 6799 | GO_OLIGOSACCHARIDE_LIPID_INTERMEDIATE_BIOSYNTHETIC_PROCESS         | 0.77 | 0.11 | 0 | 0 | 0 | not significant |
| 6800 | GO_PEROXISOME_FISSION                                              | 0.77 | 0.11 | 0 | 0 | 0 | not significant |
| 6801 | GO_PHOSPHATIDYLGLYCEROL_AcYL_CHAIN_REMODELING                      | 0.77 | 0.11 | 0 | 0 | 0 | not significant |
| 6802 | GO_PHOSPHATIDYLINOSITOL_3_KINASE_ACTIVITY                          | 0.77 | 0.11 | 0 | 0 | 0 | not significant |
| 6803 | GO_REGULATION_OF_HISTONE_H3_K9_METHYLATION                         | 0.77 | 0.11 | 0 | 0 | 0 | not significant |
| 6804 | GO_VASODILATION                                                    | 0.77 | 0.11 | 0 | 0 | 0 | not significant |
| 6805 | WANG_BARRETTES_ESOPHAGUS_DN                                        | 0.77 | 0.11 | 0 | 0 | 0 | not significant |
| 6806 | BIOCARTA_CSK_PATHWAY                                               | 0.77 | 0.1  | 0 | 0 | 0 | not significant |
| 6807 | GO_FAD_BINDING                                                     | 0.77 | 0.1  | 0 | 0 | 0 | not significant |
| 6808 | GO_NEGATIVE_REGULATION_OF_LEUKOCYTE_APOPTOTIC_PROCESS              | 0.77 | 0.1  | 0 | 0 | 0 | not significant |
| 6809 | GO_NEGATIVE_REGULATION_OF_PEPTIDYL_LYSINE_ACETYLATION              | 0.77 | 0.1  | 0 | 0 | 0 | not significant |
| 6810 | GO_POSITIVE_REGULATION_OF_EMBRYONIC_DEVELOPMENT                    | 0.77 | 0.1  | 0 | 0 | 0 | not significant |
| 6811 | GO_PROLINE_RICH_REGION_BINDING                                     | 0.77 | 0.1  | 0 | 0 | 0 | not significant |
| 6812 | GO_REGULATION_OF_LONG_TERM_SYNAPTIC_POTENTIATION                   | 0.77 | 0.1  | 0 | 0 | 0 | not significant |
| 6813 | GO_TRANS_GOLGI_NETWORK_TRANSPORT_VESICLE                           | 0.77 | 0.1  | 0 | 0 | 0 | not significant |
| 6814 | REACTOME_INSERTION_OF_TAIL_ANCHORED_PROTEINS_INTO_THE_ENDOPLASMIC  | 0.77 | 0.1  | 0 | 0 | 0 | not significant |
| 6815 | REACTOME_THE_ROLE_OF_NEF_IN_HIV_1_REPLICATION_AND_DISEASE_PATHOGE  | 0.77 | 0.1  | 0 | 0 | 0 | not significant |
| 6816 | SIG_IL4RECEPTOR_IN_B_LYPHOCYTES                                    | 0.77 | 0.1  | 0 | 0 | 0 | not significant |
| 6817 | CHR9Q21                                                            | 0.77 | 0.09 | 0 | 0 | 0 | not significant |
| 6818 | GO_TERTIARY_GRANULE_MEMBRANE                                       | 0.77 | 0.09 | 0 | 0 | 0 | not significant |
| 6819 | KEGG_ANTIGEN_PROCESSING_AND_PRESENTATION                           | 0.77 | 0.09 | 0 | 0 | 0 | not significant |
| 6820 | CHRXQ28                                                            | 0.77 | 0.08 | 0 | 0 | 0 | not significant |
| 6821 | GO_NEGATIVE_REGULATION_OF_CELL_MORPHOGENESIS_INVOLVED_IN_DIFFEREN  | 0.77 | 0.08 | 0 | 0 | 0 | not significant |
| 6822 | GO_PROTEIN_TARGETING_TO_VACUOLE                                    | 0.77 | 0.08 | 0 | 0 | 0 | not significant |
| 6823 | GO_RAC_GTPASE_BINDING                                              | 0.77 | 0.08 | 0 | 0 | 0 | not significant |
| 6824 | GO_REGULATION_OF_T_CELL_RECEPTOR_SIGNALING_PATHWAY                 | 0.77 | 0.08 | 0 | 0 | 0 | not significant |
| 6825 | KEGG_PPAR_SIGNALING_PATHWAY                                        | 0.77 | 0.08 | 0 | 0 | 0 | not significant |
| 6826 | LIN_APC_TARGETS                                                    | 0.77 | 0.08 | 0 | 0 | 0 | not significant |
| 6827 | GO_CORTICAL_ACTIN_CYTOSKELETON                                     | 0.77 | 0.07 | 0 | 0 | 0 | not significant |
| 6828 | KEGG_APOPTOSIS                                                     | 0.77 | 0.07 | 0 | 0 | 0 | not significant |
| 6829 | GO_CALCIIUM_ION_TRANSMEMBRANE_IMPORT_INTO_CYTOSOL                  | 0.77 | 0.06 | 0 | 0 | 0 | not significant |
| 6830 | GO_CORTICAL_CYTOSKELETON                                           | 0.77 | 0.06 | 0 | 0 | 0 | not significant |
| 6831 | GO_EPITHELIAL_CELL_DEVELOPMENT                                     | 0.77 | 0.06 | 0 | 0 | 0 | not significant |
| 6832 | KEGG_FC_EPSILON_RI_SIGNALING_PATHWAY                               | 0.77 | 0.06 | 0 | 0 | 0 | not significant |
| 6833 | XU_GHI_AUTOOCRINE_TARGETS_UP                                       | 0.77 | 0.05 | 0 | 0 | 0 | not significant |
| 6834 | LINDGREN_BLADDER_CANCER_CLUSTER_2A_DN                              | 0.77 | 0.04 | 0 | 0 | 0 | not significant |
| 6835 | GO_HEART_DEVELOPMENT                                               | 0.77 | 0.02 | 0 | 0 | 0 | not significant |
| 6836 | GO_NUCLEOSIDE_TRIPHOSPHATASE_REGULATOR_ACTIVITY                    | 0.77 | 0.01 | 0 | 0 | 0 | not significant |
| 6837 | IVANOVA_HEMATOPOIESIS_LATE_PROGENITOR                              | 0.77 | 0.01 | 0 | 0 | 0 | not significant |
| 6838 | GO_COENZYME_A_METABOLIC_PROCESS                                    | 0.78 | 0.14 | 0 | 0 | 0 | not significant |
| 6839 | GO_PLATELET_DERIVED_GROWTH_FACTOR_RECEPTOR_BINDING                 | 0.78 | 0.14 | 0 | 0 | 0 | not significant |
| 6840 | GO_RNA_POLYMERASE_III_PREINITIATION_COMPLEX_ASSEMBLY               | 0.78 | 0.14 | 0 | 0 | 0 | not significant |
| 6841 | GO_SUGAR_TRANSMEMBRANE_TRANSPORTER_ACTIVITY                        | 0.78 | 0.14 | 0 | 0 | 0 | not significant |
| 6842 | BIOCARTA_HSP27_PATHWAY                                             | 0.78 | 0.13 | 0 | 0 | 0 | not significant |
| 6843 | GO_ATP_DEPENDENT_3_5_DNA_HELICASE_ACTIVITY                         | 0.78 | 0.13 | 0 | 0 | 0 | not significant |
| 6844 | GO_DENDRITE_MEMBRANE                                               | 0.78 | 0.13 | 0 | 0 | 0 | not significant |
| 6845 | GO_MALE_SEX_DETERMINATION                                          | 0.78 | 0.13 | 0 | 0 | 0 | not significant |
| 6846 | GO_MITOGEN_ACTIVATED_PROTEIN_KINASE_P38_BINDING                    | 0.78 | 0.13 | 0 | 0 | 0 | not significant |
| 6847 | GO_POSITIVE_REGULATION_OF_MAMMARY_GLAND_EPITHELIAL_CELL_PROLIFERA  | 0.78 | 0.13 | 0 | 0 | 0 | not significant |
| 6848 | GO_PYRIMIDINE_DIMER_REPAIR                                         | 0.78 | 0.13 | 0 | 0 | 0 | not significant |
| 6849 | GO_REGULATION_OF_AMYLOID_PRECURSOR_PROTEIN_CATABOLIC_PROCESS       | 0.78 | 0.13 | 0 | 0 | 0 | not significant |
| 6850 | GO_REGULATION_OF_NEUTROPHIL_ACTIVATION                             | 0.78 | 0.13 | 0 | 0 | 0 | not significant |
| 6851 | GO_RESPONSE_TO_DIETARY_EXCESS                                      | 0.78 | 0.13 | 0 | 0 | 0 | not significant |
| 6852 | HAHTOLA_CTCL_CUTANEOUS                                             | 0.78 | 0.13 | 0 | 0 | 0 | not significant |
| 6853 | REACTOME_FATTY_ACIDS_BOUND_TO_GPR40_FFAR1_REGULATE_INSULIN_SECRE   | 0.78 | 0.13 | 0 | 0 | 0 | not significant |
| 6854 | REACTOME_MITOCHONDRIAL_FATTY_ACID_BETA_OXIDATION_OF_SATURATED_FA   | 0.78 | 0.13 | 0 | 0 | 0 | not significant |
| 6855 | WU_HBX_TARGETS_1_UP                                                | 0.78 | 0.13 | 0 | 0 | 0 | not significant |

|      |                                                                    |      |      |   |   |   |                 |
|------|--------------------------------------------------------------------|------|------|---|---|---|-----------------|
| 6856 | BIOCARTA_IL12_PATHWAY                                              | 0.78 | 0.12 | 0 | 0 | 0 | not significant |
| 6857 | BIOCARTA_SHH_PATHWAY                                               | 0.78 | 0.12 | 0 | 0 | 0 | not significant |
| 6858 | CORRE_MULTIPLE_MYELOMA_UP                                          | 0.78 | 0.12 | 0 | 0 | 0 | not significant |
| 6859 | GO_DYNACTIN_COMPLEX                                                | 0.78 | 0.12 | 0 | 0 | 0 | not significant |
| 6860 | GO_POSITIVE_REGULATION_OF_INTRACELLULAR_ESTROGEN_RECEPTOR_SIGNAL   | 0.78 | 0.12 | 0 | 0 | 0 | not significant |
| 6861 | GO_POSITIVE_REGULATION_OF_MULTICELLULAR_ORGANISM_GROWTH            | 0.78 | 0.12 | 0 | 0 | 0 | not significant |
| 6862 | GO_PROSTANOID_BIOSYNTHETIC_PROCESS                                 | 0.78 | 0.12 | 0 | 0 | 0 | not significant |
| 6863 | KYNG_ENVIRONMENTAL_STRESS_RESPONSE_NOT_BY_UV_IN_WS                 | 0.78 | 0.12 | 0 | 0 | 0 | not significant |
| 6864 | PARK_TRETINOLIN_RESPONSE_AND_RARA_PLZF_FUSION                      | 0.78 | 0.12 | 0 | 0 | 0 | not significant |
| 6865 | REACTOME_ELEVATION_OF_CYTOSOLIC_CA2PLUS_LEVELS                     | 0.78 | 0.12 | 0 | 0 | 0 | not significant |
| 6866 | CHR7P15                                                            | 0.78 | 0.11 | 0 | 0 | 0 | not significant |
| 6867 | DAZARD_UV_RESPONSE_CLUSTER_G2                                      | 0.78 | 0.11 | 0 | 0 | 0 | not significant |
| 6868 | FERRANDO_LYL1_NEIGHBORS                                            | 0.78 | 0.11 | 0 | 0 | 0 | not significant |
| 6869 | GO_CELLULAR_RESPONSE_TO_ALKALOID                                   | 0.78 | 0.11 | 0 | 0 | 0 | not significant |
| 6870 | GO_COPPER_ION_BINDING                                              | 0.78 | 0.11 | 0 | 0 | 0 | not significant |
| 6871 | GO_PEROXISOMAL_MEMBRANE_TRANSPORT                                  | 0.78 | 0.11 | 0 | 0 | 0 | not significant |
| 6872 | GO_PITUITARY_GLAND_DEVELOPMENT                                     | 0.78 | 0.11 | 0 | 0 | 0 | not significant |
| 6873 | GO_PROTEIN_K48_LINKED_DEUBIQUITINATION                             | 0.78 | 0.11 | 0 | 0 | 0 | not significant |
| 6874 | GO_PYRIMIDINE_CONTAINING_COMPOUND_CATABOLIC_PROCESS                | 0.78 | 0.11 | 0 | 0 | 0 | not significant |
| 6875 | MARIADASON_RESPONSE_TO_BUTYRATE_SULINDAC_4                         | 0.78 | 0.11 | 0 | 0 | 0 | not significant |
| 6876 | YANG_BREAST_CANCER_ESR1_BULK_UP                                    | 0.78 | 0.11 | 0 | 0 | 0 | not significant |
| 6877 | CHR1Q31                                                            | 0.78 | 0.1  | 0 | 0 | 0 | not significant |
| 6878 | GO_ANTIBIOTIC_METABOLIC_PROCESS                                    | 0.78 | 0.1  | 0 | 0 | 0 | not significant |
| 6879 | GO_PIGMENT_METABOLIC_PROCESS                                       | 0.78 | 0.1  | 0 | 0 | 0 | not significant |
| 6880 | GO_PYRIDINE_CONTAINING_COMPOUND_METABOLIC_PROCESS                  | 0.78 | 0.1  | 0 | 0 | 0 | not significant |
| 6881 | KUNINGER_IGF1_VS_PDGF_TARGETS_DN                                   | 0.78 | 0.1  | 0 | 0 | 0 | not significant |
| 6882 | CHR11Q23                                                           | 0.78 | 0.09 | 0 | 0 | 0 | not significant |
| 6883 | GO_PIGMENT_BIOSYNTHETIC_PROCESS                                    | 0.78 | 0.09 | 0 | 0 | 0 | not significant |
| 6884 | GO_PLATELET_AGGREGATION                                            | 0.78 | 0.09 | 0 | 0 | 0 | not significant |
| 6885 | GO_VESICLE_MEDIATED_TRANSPORT_BETWEEN_ENDOSOMAL_COMPARTMENTS       | 0.78 | 0.09 | 0 | 0 | 0 | not significant |
| 6886 | LEE_CALORIE_RESTRICTION_NEOCORTEX_UP                               | 0.78 | 0.09 | 0 | 0 | 0 | not significant |
| 6887 | LINDSTEDT_DENDRITIC_CELL_MATURATION_D                              | 0.78 | 0.09 | 0 | 0 | 0 | not significant |
| 6888 | PETROVA_PROX1_TARGETS_DN                                           | 0.78 | 0.09 | 0 | 0 | 0 | not significant |
| 6889 | REACTOME_ONCOGENE_INDUCED_SENESCENCE                               | 0.78 | 0.09 | 0 | 0 | 0 | not significant |
| 6890 | GO_FORMATION_OF_PRIMARY_GERM_LAYER                                 | 0.78 | 0.08 | 0 | 0 | 0 | not significant |
| 6891 | GO_REGULATION_OF_OXIDOREDUCTASE_ACTIVITY                           | 0.78 | 0.08 | 0 | 0 | 0 | not significant |
| 6892 | REACTOME_ACTIVATION_OF_THE_MRNA_UPON_BINDING_OF_THE_CAP_BINDING_C  | 0.78 | 0.08 | 0 | 0 | 0 | not significant |
| 6893 | SASSON_RESPONSE_TO_GONADOTROPHINS_DN                               | 0.78 | 0.08 | 0 | 0 | 0 | not significant |
| 6894 | GO_LIPID_PHOSPHORYLATION                                           | 0.78 | 0.07 | 0 | 0 | 0 | not significant |
| 6895 | GO_PROTEIN_DEPOLYMERIZATION                                        | 0.78 | 0.07 | 0 | 0 | 0 | not significant |
| 6896 | GO_REGULATION_OF_SYNAPTIC_VESICLE_CYCLE                            | 0.78 | 0.07 | 0 | 0 | 0 | not significant |
| 6897 | GO_CYTOSOLIC_RIBOSOME                                              | 0.78 | 0.06 | 0 | 0 | 0 | not significant |
| 6898 | GO_REGULATION_OF_VIRAL_LIFE_CYCLE                                  | 0.78 | 0.06 | 0 | 0 | 0 | not significant |
| 6899 | MIYAGAWA_TARGETS_OF_EWSR1_ETS_FUSIONS_DN                           | 0.78 | 0.06 | 0 | 0 | 0 | not significant |
| 6900 | GO_ACTIN_FILAMENT_ORGANIZATION                                     | 0.78 | 0.02 | 0 | 0 | 0 | not significant |
| 6901 | YAGI_AML_WITH_INV_16_TRANSLOCATION                                 | 0.78 | 0.02 | 0 | 0 | 0 | not significant |
| 6902 | GO_4_HYDROXYPROLINE_METABOLIC_PROCESS                              | 0.78 | 0.15 | 0 | 0 | 0 | not significant |
| 6903 | GO_ALPHA_BETA_T_CELL_RECEPTOR_COMPLEX                              | 0.79 | 0.15 | 0 | 0 | 0 | not significant |
| 6904 | GO_EPHRIN_RECEPTOR_ACTIVITY                                        | 0.79 | 0.15 | 0 | 0 | 0 | not significant |
| 6905 | GO_NEGATIVE_REGULATION_OF_PROTEIN_KINASE_ACTIVITY_BY_REGULATION_OF | 0.79 | 0.15 | 0 | 0 | 0 | not significant |
| 6906 | GO_PEPTIDYL_PROLINE_HYDROXYLATION_TO_4_HYDROXY_L_PROLINE           | 0.79 | 0.15 | 0 | 0 | 0 | not significant |
| 6907 | ISHIKAWA_STING_SIGNALING                                           | 0.79 | 0.15 | 0 | 0 | 0 | not significant |
| 6908 | BIOCARTA_MTA3_PATHWAY                                              | 0.79 | 0.14 | 0 | 0 | 0 | not significant |
| 6909 | FRIDMAN_SENESCENCE_DN                                              | 0.79 | 0.14 | 0 | 0 | 0 | not significant |
| 6910 | GO_AORTA_MORPHOGENESIS                                             | 0.79 | 0.14 | 0 | 0 | 0 | not significant |
| 6911 | GO_G1_TO_G0_TRANSITION                                             | 0.79 | 0.14 | 0 | 0 | 0 | not significant |
| 6912 | GO_METANEPHRIC_COLLECTING_DUCT_DEVELOPMENT                         | 0.79 | 0.14 | 0 | 0 | 0 | not significant |
| 6913 | GO_MOTOR_BEHAVIOR                                                  | 0.79 | 0.14 | 0 | 0 | 0 | not significant |
| 6914 | GO_MUTLALPHA_COMPLEX                                               | 0.79 | 0.14 | 0 | 0 | 0 | not significant |
| 6915 | GO_NEGATIVE_REGULATION_OF_PROTEIN_HOMOOIGOMERIZATION               | 0.79 | 0.14 | 0 | 0 | 0 | not significant |
| 6916 | GO_PHOSPHOLIPASE_BINDING                                           | 0.79 | 0.14 | 0 | 0 | 0 | not significant |
| 6917 | GO_REGULATION_OF_CYTOLYSIS                                         | 0.79 | 0.14 | 0 | 0 | 0 | not significant |
| 6918 | GO_REGULATION_OF_OVARIAN_FOLLICLE_DEVELOPMENT                      | 0.79 | 0.14 | 0 | 0 | 0 | not significant |
| 6919 | REACTOME_NEGATIVE_REGULATION_OF_NMDA_RECEPTOR_MEDIATED_NEURONA     | 0.79 | 0.14 | 0 | 0 | 0 | not significant |
| 6920 | RICKMAN_HEAD_AND_NECK_CANCER_C                                     | 0.79 | 0.14 | 0 | 0 | 0 | not significant |
| 6921 | RUNNE_GENDER_EFFECT_UP                                             | 0.79 | 0.14 | 0 | 0 | 0 | not significant |
| 6922 | XU_AKT1_TARGETS_48HR                                               | 0.79 | 0.14 | 0 | 0 | 0 | not significant |
| 6923 | BIOCARTA_RANBP2_PATHWAY                                            | 0.79 | 0.13 | 0 | 0 | 0 | not significant |
| 6924 | CHEN_LVAD_SUPPORT_OF_FAILING_HEART_DN                              | 0.79 | 0.13 | 0 | 0 | 0 | not significant |
| 6925 | CHR8P12                                                            | 0.79 | 0.13 | 0 | 0 | 0 | not significant |
| 6926 | GHO_ATF5_TARGETS_UP                                                | 0.79 | 0.13 | 0 | 0 | 0 | not significant |
| 6927 | GO_C3HC4_TYPE_RING_FINGER_DOMAIN_BINDING                           | 0.79 | 0.13 | 0 | 0 | 0 | not significant |
| 6928 | GO_DIACYLGLYCEROL_BINDING                                          | 0.79 | 0.13 | 0 | 0 | 0 | not significant |
| 6929 | GO_GOLGI_RIBBON_FORMATION                                          | 0.79 | 0.13 | 0 | 0 | 0 | not significant |
| 6930 | GO_INTEGRIN_ACTIVATION                                             | 0.79 | 0.13 | 0 | 0 | 0 | not significant |
| 6931 | GO_NEUROPEPTIDE_RECEPTOR_BINDING                                   | 0.79 | 0.13 | 0 | 0 | 0 | not significant |
| 6932 | GO_PODOSOME_ASSEMBLY                                               | 0.79 | 0.13 | 0 | 0 | 0 | not significant |
| 6933 | GO_SEX_CHROMATIN                                                   | 0.79 | 0.13 | 0 | 0 | 0 | not significant |
| 6934 | GO_U6_SNRNP                                                        | 0.79 | 0.13 | 0 | 0 | 0 | not significant |
| 6935 | GREENBAUM_E2A_TARGETS_DN                                           | 0.79 | 0.13 | 0 | 0 | 0 | not significant |
| 6936 | KEGG_PRION_DISEASES                                                | 0.79 | 0.13 | 0 | 0 | 0 | not significant |
| 6937 | LI_CISPLATIN_RESISTANCE_DN                                         | 0.79 | 0.13 | 0 | 0 | 0 | not significant |
| 6938 | MANTOVANI_NFKB_TARGETS_UP                                          | 0.79 | 0.13 | 0 | 0 | 0 | not significant |
| 6939 | MARKS_HDAC_TARGETS_DN                                              | 0.79 | 0.13 | 0 | 0 | 0 | not significant |
| 6940 | REACTOME_NICOTINAMIDE_SALVAGING                                    | 0.79 | 0.13 | 0 | 0 | 0 | not significant |
| 6941 | VALK_AML_CLUSTER_15                                                | 0.79 | 0.13 | 0 | 0 | 0 | not significant |
| 6942 | WANG_NEOPLASTIC_TRANSFORMATION_BY_CCND1_MYC                        | 0.79 | 0.13 | 0 | 0 | 0 | not significant |
| 6943 | WELCH_GATA1_TARGETS                                                | 0.79 | 0.13 | 0 | 0 | 0 | not significant |
| 6944 | BANDRES_RESPONSE_TO_CARMUSTIN_WITHOUT_MGMT_24HR_UP                 | 0.79 | 0.12 | 0 | 0 | 0 | not significant |
| 6945 | BIOCARTA_ERKS_PATHWAY                                              | 0.79 | 0.12 | 0 | 0 | 0 | not significant |
| 6946 | BYSTRYKH_HEMATOPOIESIS_STEM_CELL_SCP2_QTL_TRANS                    | 0.79 | 0.12 | 0 | 0 | 0 | not significant |
| 6947 | GO_L_ASCORBIC_ACID_BINDING                                         | 0.79 | 0.12 | 0 | 0 | 0 | not significant |
| 6948 | GO_NEGATIVE_REGULATION_OF_PROTEIN_LOCALIZATION_TO_NUCLEUS          | 0.79 | 0.12 | 0 | 0 | 0 | not significant |
| 6949 | GO_POLYAMINE_METABOLIC_PROCESS                                     | 0.79 | 0.12 | 0 | 0 | 0 | not significant |
| 6950 | GO_REGULATION_OF_CHROMATIN_SILENCING                               | 0.79 | 0.12 | 0 | 0 | 0 | not significant |
| 6951 | GO_REGULATION_OF_NON_CANONICAL_WNT_SIGNALING_PATHWAY               | 0.79 | 0.12 | 0 | 0 | 0 | not significant |
| 6952 | ICHIBA_GRAFT_VERSUS_HOST_DISEASE_35D_DN                            | 0.79 | 0.12 | 0 | 0 | 0 | not significant |
| 6953 | KORKOLA_CORRELATED_WITH_POUSF1                                     | 0.79 | 0.12 | 0 | 0 | 0 | not significant |
| 6954 | LIU_LIVER_CANCER                                                   | 0.79 | 0.12 | 0 | 0 | 0 | not significant |
| 6955 | REACTOME_TP53_REGULATES_TRANSCRIPTION_OF_GENES_INVOLVED_IN_CYTOC   | 0.79 | 0.12 | 0 | 0 | 0 | not significant |
| 6956 | GO_FATTY_ACID_TRANSMEMBRANE_TRANSPORT                              | 0.79 | 0.11 | 0 | 0 | 0 | not significant |
| 6957 | GO_POSITIVE_REGULATION_OF_ERYTHROCYTE_DIFFERENTIATION              | 0.79 | 0.11 | 0 | 0 | 0 | not significant |
| 6958 | GO_REGULATION_OF_MITOCHONDRIAL OUTER_MEMBRANE_PERMEABILIZATION_IN  | 0.79 | 0.11 | 0 | 0 | 0 | not significant |
| 6959 | KAAB_FAILED_HEART_ATRIUM_UP                                        | 0.79 | 0.11 | 0 | 0 | 0 | not significant |
| 6960 | KYNG_RESPONSE_TO_H2O2_VIA_ERCC6_DN                                 | 0.79 | 0.11 | 0 | 0 | 0 | not significant |
| 6961 | GO_CYTOPLASMIC_MICROTUBULE_ORGANIZATION                            | 0.79 | 0.1  | 0 | 0 | 0 | not significant |
| 6962 | GO_MEMBRANE_DEPOLARIZATION                                         | 0.79 | 0.1  | 0 | 0 | 0 | not significant |
| 6963 | GO_MULTI_ORGANISM_CELLULAR_PROCESS                                 | 0.79 | 0.1  | 0 | 0 | 0 | not significant |
| 6964 | GO_POLY_PYRIMIDINE_TRACT_BINDING                                   | 0.79 | 0.1  | 0 | 0 | 0 | not significant |

|      |                                                                   |      |      |   |   |   |                 |
|------|-------------------------------------------------------------------|------|------|---|---|---|-----------------|
| 6965 | XU_HGF_TARGETS_REPRESSED_BY_AKT1_DN                               | 0.79 | 0.1  | 0 | 0 | 0 | not significant |
| 6966 | GUO_HEX_TARGETS_UP                                                | 0.79 | 0.09 | 0 | 0 | 0 | not significant |
| 6967 | GO_DETECTION_OF ABIOTIC_STIMULUS                                  | 0.79 | 0.08 | 0 | 0 | 0 | not significant |
| 6968 | GO_DNA_MODIFICATION                                               | 0.79 | 0.08 | 0 | 0 | 0 | not significant |
| 6969 | ROESSLER_LIVER_CANCER_METASTASIS_UP                               | 0.79 | 0.08 | 0 | 0 | 0 | not significant |
| 6970 | REACTOME_GLOBAL_GENOME_NUCLEOTIDE_EXCISION_REPAIR_GG_NER          | 0.79 | 0.07 | 0 | 0 | 0 | not significant |
| 6971 | IVANOVA_HEMATOPOIESIS_STEM_CELL_LONG_TERM                         | 0.79 | 0.06 | 0 | 0 | 0 | not significant |
| 6972 | GO_REGULATION_OF_PROTEIN_LOCALIZATION_TO_MEMBRANE                 | 0.79 | 0.05 | 0 | 0 | 0 | not significant |
| 6973 | GO_EPITHELIAL_TUBE_MORPHOGENESIS                                  | 0.79 | 0.04 | 0 | 0 | 0 | not significant |
| 6974 | GO_REGULATION_OF_TRANS_SYNAPTIC_SIGNALING                         | 0.79 | 0.04 | 0 | 0 | 0 | not significant |
| 6975 | GO_MUSCLE_SYSTEM_PROCESS                                          | 0.79 | 0.03 | 0 | 0 | 0 | not significant |
| 6976 | GO_PROTEIN_ACYLATION                                              | 0.79 | 0.03 | 0 | 0 | 0 | not significant |
| 6977 | GO_EMBRYONIC_MORPHOGENESIS                                        | 0.79 | 0.02 | 0 | 0 | 0 | not significant |
| 6978 | GO_VESICLE_ORGANIZATION                                           | 0.79 | 0.02 | 0 | 0 | 0 | not significant |
| 6979 | GO_PROTEIN_LOCALIZATION_TO_MEMBRANE                               | 0.79 | 0.01 | 0 | 0 | 0 | not significant |
| 6980 | CHR2Q34                                                           | 0.80 | 0.16 | 0 | 0 | 0 | not significant |
| 6981 | GO_COPPER_ION_TRANSMEMBRANE_TRANSPORT                             | 0.80 | 0.16 | 0 | 0 | 0 | not significant |
| 6982 | GO_LIPOXYGENASE_PATHWAY                                           | 0.80 | 0.16 | 0 | 0 | 0 | not significant |
| 6983 | REACTOME_SYNTHESIS_OF_DOLICHYL_PHOSPHATE                          | 0.80 | 0.16 | 0 | 0 | 0 | not significant |
| 6984 | CHR7P11                                                           | 0.80 | 0.15 | 0 | 0 | 0 | not significant |
| 6985 | GHANDHI_BYSTANDER_IRRADIATION_DN                                  | 0.80 | 0.15 | 0 | 0 | 0 | not significant |
| 6986 | GO_POSITIVE_REGULATION_OF_INTRACELLULAR_STEROID_HORMONE_RECEPTOR  | 0.80 | 0.15 | 0 | 0 | 0 | not significant |
| 6987 | GO_POSITIVE_REGULATION_OF_PROTEIN_POLYUBIQUITINATION              | 0.80 | 0.15 | 0 | 0 | 0 | not significant |
| 6988 | GO_PROTEIN_PHOSPHATASE_TYPE_1_COMPLEX                             | 0.80 | 0.15 | 0 | 0 | 0 | not significant |
| 6989 | GO_REGULATION_OF_NUCLEAR_CELL_CYCLE_DNA_REPLICATION               | 0.80 | 0.15 | 0 | 0 | 0 | not significant |
| 6990 | GO_SORTING_ENDOSOME                                               | 0.80 | 0.15 | 0 | 0 | 0 | not significant |
| 6991 | GO_TRIGLYCERIDE_CATABOLIC_PROCESS                                 | 0.80 | 0.15 | 0 | 0 | 0 | not significant |
| 6992 | GO_VERY_LONG_CHAIN_FATTY_ACID_COA_LIGASE_ACTIVITY                 | 0.80 | 0.15 | 0 | 0 | 0 | not significant |
| 6993 | HOLLEMAN_DAUORUBICIN_ALL_UP                                       | 0.80 | 0.15 | 0 | 0 | 0 | not significant |
| 6994 | LE_SKI_TARGETS_UP                                                 | 0.80 | 0.15 | 0 | 0 | 0 | not significant |
| 6995 | NIKOLSKY_BREAST_CANCER_6P24_P22_AMPLICON                          | 0.80 | 0.15 | 0 | 0 | 0 | not significant |
| 6996 | REACTOME_HEME_BIOSYNTHESIS                                        | 0.80 | 0.15 | 0 | 0 | 0 | not significant |
| 6997 | YANG_MUC2_TARGETS_DUODENUM_3MO_DN                                 | 0.80 | 0.15 | 0 | 0 | 0 | not significant |
| 6998 | GO_CHONDROCYTE_DEVELOPMENT_INVOLVED_IN_ENDOCHONDRAL_BONE_MORP     | 0.80 | 0.14 | 0 | 0 | 0 | not significant |
| 6999 | GO_DIAPEDESIS                                                     | 0.80 | 0.14 | 0 | 0 | 0 | not significant |
| 7000 | GO_EQUATORIAL_MICROTUBULE_ORGANIZING_CENTER                       | 0.80 | 0.14 | 0 | 0 | 0 | not significant |
| 7001 | GO_NEGATIVE_REGULATION_OF_REACTIVE_OXYGEN_SPECIES_BIOSYNTHETIC_PR | 0.80 | 0.14 | 0 | 0 | 0 | not significant |
| 7002 | GO_PALMITOYLTRANSFERASE_COMPLEX                                   | 0.80 | 0.14 | 0 | 0 | 0 | not significant |
| 7003 | GO_REGULATION_OF_MAST_CELL_ACTIVATION_INVOLVED_IN_IMMUNE_RESPONSE | 0.80 | 0.14 | 0 | 0 | 0 | not significant |
| 7004 | GO_RETINAL_ROD_CELL_DEVELOPMENT                                   | 0.80 | 0.14 | 0 | 0 | 0 | not significant |
| 7005 | GO_T_CELL_RECEPTOR_COMPLEX                                        | 0.80 | 0.14 | 0 | 0 | 0 | not significant |
| 7006 | REACTOME_POST_TRANSCRIPTIONAL_SILENCING_BY_SMALL_RNAS             | 0.80 | 0.14 | 0 | 0 | 0 | not significant |
| 7007 | REACTOME_SIGNALING_BY_BMP                                         | 0.80 | 0.14 | 0 | 0 | 0 | not significant |
| 7008 | WORSCHER_TUMOR_REJECTION_DN                                       | 0.80 | 0.14 | 0 | 0 | 0 | not significant |
| 7009 | ZHENG_FOXP3_TARGETS_DN                                            | 0.80 | 0.14 | 0 | 0 | 0 | not significant |
| 7010 | BREDEMEYER_RAG_SIGNALING_VIA_ATM_NOT_VIA_NFKB_DN                  | 0.80 | 0.13 | 0 | 0 | 0 | not significant |
| 7011 | GO_FUCOSE_METABOLIC_PROCESS                                       | 0.80 | 0.13 | 0 | 0 | 0 | not significant |
| 7012 | GO_INNER_EAR_RECEPTOR_CELL_STEREOCLILUM_ORGANIZATION              | 0.80 | 0.13 | 0 | 0 | 0 | not significant |
| 7013 | GO_INTERMEMBRANE_LIPID_TRANSFER                                   | 0.80 | 0.13 | 0 | 0 | 0 | not significant |
| 7014 | GO_LONG_TERM_SYNAPTIC_DEPRESSION                                  | 0.80 | 0.13 | 0 | 0 | 0 | not significant |
| 7015 | GO_MISMATCH_REPAIR_COMPLEX                                        | 0.80 | 0.13 | 0 | 0 | 0 | not significant |
| 7016 | GO_NEGATIVE_REGULATION_OF_STEM_CELL_DIFFERENTIATION               | 0.80 | 0.13 | 0 | 0 | 0 | not significant |
| 7017 | GO_OXIDOREDUCTASE_ACTIVITY_ACTING_ON_THE_ALDEHYDE_OR_OXO_GROUP    | 0.80 | 0.13 | 0 | 0 | 0 | not significant |
| 7018 | GO_PHOSPHATIDYLINOSITOL_3_PHOSPHATE_BIOSYNTHETIC_PROCESS          | 0.80 | 0.13 | 0 | 0 | 0 | not significant |
| 7019 | GO_REGULATION_OF_INTRACELLULAR_ESTROGEN_RECEPTOR_SIGNALING_PATH   | 0.80 | 0.13 | 0 | 0 | 0 | not significant |
| 7020 | GO_REGULATION_OF_T_CELL_TOLERANCE_INDUCTION                       | 0.80 | 0.13 | 0 | 0 | 0 | not significant |
| 7021 | GO_U1_SNRNP                                                       | 0.80 | 0.13 | 0 | 0 | 0 | not significant |
| 7022 | GO_ZYMOGEN_ACTIVATION                                             | 0.80 | 0.13 | 0 | 0 | 0 | not significant |
| 7023 | PID_A6B1_A6B4_INTEGRIN_PATHWAY                                    | 0.80 | 0.13 | 0 | 0 | 0 | not significant |
| 7024 | REACTOME_RUNX2_REGULATES_BONE_DEVELOPMENT                         | 0.80 | 0.13 | 0 | 0 | 0 | not significant |
| 7025 | REACTOME_SPHINGOLIPID_DE_NOVO_BIOSYNTHESIS                        | 0.80 | 0.13 | 0 | 0 | 0 | not significant |
| 7026 | REACTOME_TRANSFERRIN_ENDOCYTOSIS_AND_RECYCLING                    | 0.80 | 0.13 | 0 | 0 | 0 | not significant |
| 7027 | ZWANG_CLASS_2_TRANSIENTLY_INDUCED_BY_EGF                          | 0.80 | 0.13 | 0 | 0 | 0 | not significant |
| 7028 | BECKER_TAMOXIFEN_RESISTANCE_DN                                    | 0.80 | 0.12 | 0 | 0 | 0 | not significant |
| 7029 | CHEN_HOXA5_TARGETS_9HR_DN                                         | 0.80 | 0.12 | 0 | 0 | 0 | not significant |
| 7030 | GO_MITOCHONDRIAL_GENOME_MAINTENANCE                               | 0.80 | 0.12 | 0 | 0 | 0 | not significant |
| 7031 | HU_GENOTOXIC_DAMAGE_24HR                                          | 0.80 | 0.12 | 0 | 0 | 0 | not significant |
| 7032 | NAKAYAMA_SOFT_TISSUE_TUMORS_PCA1_DN                               | 0.80 | 0.12 | 0 | 0 | 0 | not significant |
| 7033 | SU_PANCREAS                                                       | 0.80 | 0.12 | 0 | 0 | 0 | not significant |
| 7034 | YAMASHITA_LIVER_CANCER_STEM_CELL_DN                               | 0.80 | 0.12 | 0 | 0 | 0 | not significant |
| 7035 | BIOCARTA_ALK_PATHWAY                                              | 0.80 | 0.11 | 0 | 0 | 0 | not significant |
| 7036 | GO_FILOPODIUM_ASSEMBLY                                            | 0.80 | 0.11 | 0 | 0 | 0 | not significant |
| 7037 | REACTOME_G_ALPHA_S_SIGNALING_EVENTS                               | 0.80 | 0.11 | 0 | 0 | 0 | not significant |
| 7038 | REACTOME_PRC2_METHYLATES_HISTONES_AND_DNA                         | 0.80 | 0.11 | 0 | 0 | 0 | not significant |
| 7039 | REACTOME_TRANSPORT_OF_BILE_SALTS_AND_ORGANIC_ACIDS_METAL_IONS_AN  | 0.80 | 0.11 | 0 | 0 | 0 | not significant |
| 7040 | GO_NEGATIVE_REGULATION_OF_ION_TRANSPORT                           | 0.80 | 0.1  | 0 | 0 | 0 | not significant |
| 7041 | JAZAG_TGFB1_SIGNALING_UP                                          | 0.80 | 0.1  | 0 | 0 | 0 | not significant |
| 7042 | LEE_LIVER_CANCER_MYC_TGFA_UP                                      | 0.80 | 0.1  | 0 | 0 | 0 | not significant |
| 7043 | REACTOME_DISEASES_OF_METABOLISM                                   | 0.80 | 0.09 | 0 | 0 | 0 | not significant |
| 7044 | GO_NEGATIVE_REGULATION_OF_NEURON_PROJECTION_DEVELOPMENT           | 0.80 | 0.08 | 0 | 0 | 0 | not significant |
| 7045 | PKCA_DNV1_DN                                                      | 0.80 | 0.08 | 0 | 0 | 0 | not significant |
| 7046 | PLASARI_TGFB1_SIGNALING_VIA_NFIC_1HR_DN                           | 0.80 | 0.08 | 0 | 0 | 0 | not significant |
| 7047 | REACTOME_CHROMOSOME_MAINTENANCE                                   | 0.80 | 0.08 | 0 | 0 | 0 | not significant |
| 7048 | SMID_BREAST_CANCER_LUMINAL_B_UP                                   | 0.80 | 0.08 | 0 | 0 | 0 | not significant |
| 7049 | TIEN_INTESTINE_PROBIOTICS_2HR_DN                                  | 0.80 | 0.08 | 0 | 0 | 0 | not significant |
| 7050 | MULLIGHAN_NPM1_MUTATED_SIGNATURE_1_DN                             | 0.80 | 0.07 | 0 | 0 | 0 | not significant |
| 7051 | MULLIGHAN_NPM1_SIGNATURE_3_DN                                     | 0.80 | 0.07 | 0 | 0 | 0 | not significant |
| 7052 | GAUSSMANN_MLL_AF4_FUSION_TARGETS_A_UP                             | 0.80 | 0.06 | 0 | 0 | 0 | not significant |
| 7053 | GO_APPENDAGE_DEVELOPMENT                                          | 0.80 | 0.06 | 0 | 0 | 0 | not significant |
| 7054 | GO_REGULATION_OF_EXOCYTOSIS                                       | 0.80 | 0.06 | 0 | 0 | 0 | not significant |
| 7055 | GO_RHO_GTPASE_BINDING                                             | 0.80 | 0.06 | 0 | 0 | 0 | not significant |
| 7056 | NOUZOVA_TRETINOIN_AND_H4_ACETYLATION                              | 0.80 | 0.06 | 0 | 0 | 0 | not significant |
| 7057 | GO_REGULATION_OF_MACROAUTOPHAGY                                   | 0.80 | 0.05 | 0 | 0 | 0 | not significant |
| 7058 | GO_SYNAPSE                                                        | 0.80 | 0.01 | 0 | 0 | 0 | not significant |
| 7059 | GO_POSITIVE_REGULATION_OF_VESICLE_FUSION                          | 0.81 | 0.17 | 0 | 0 | 0 | not significant |
| 7060 | FRASOR_TAMOXIFEN_RESPONSE_DN                                      | 0.81 | 0.16 | 0 | 0 | 0 | not significant |
| 7061 | GO_AXIS_ELONGATION                                                | 0.81 | 0.16 | 0 | 0 | 0 | not significant |
| 7062 | GO_LYSOSOMAL_PROTEIN_CATABOLIC_PROCESS                            | 0.81 | 0.16 | 0 | 0 | 0 | not significant |
| 7063 | GO_MAINTENANCE_OF_DNA_METHYLATION                                 | 0.81 | 0.16 | 0 | 0 | 0 | not significant |
| 7064 | GO_POSITIVE_REGULATION_OF_TUMOR_NECROSIS_FACTOR_MEDIATED_SIGNALIN | 0.81 | 0.16 | 0 | 0 | 0 | not significant |
| 7065 | GO_REGULATION_OF_EXTRACELLULAR_MATRIX_DISASSEMBLY                 | 0.81 | 0.16 | 0 | 0 | 0 | not significant |
| 7066 | MAGRANGEAS_MULTIPLE_MYELOMA_IGG_VS_IGG_UP                         | 0.81 | 0.16 | 0 | 0 | 0 | not significant |
| 7067 | SHIRAIISHI_PLZF_TARGETS_UP                                        | 0.81 | 0.16 | 0 | 0 | 0 | not significant |
| 7068 | TSUDA_ALVEOLAR_SOFT_PART_SARCOMA                                  | 0.81 | 0.16 | 0 | 0 | 0 | not significant |
| 7069 | GO_AMYLOID_BETA_CLEARANCE_BY_TRANSCYTOSIS                         | 0.81 | 0.15 | 0 | 0 | 0 | not significant |
| 7070 | GO_CENTRIOLE_ELONGATION                                           | 0.81 | 0.15 | 0 | 0 | 0 | not significant |
| 7071 | GO_CROSSOVER_JUNCTION_ENDODEOXYRIBONUCLEASE_ACTIVITY              | 0.81 | 0.15 | 0 | 0 | 0 | not significant |
| 7072 | GO_DOLICHYL_DIPHOSPHATE_BIOSYNTHETIC_PROCESS                      | 0.81 | 0.15 | 0 | 0 | 0 | not significant |
| 7073 | GO_FRUCTOSE_6_PHOSPHATE_METABOLIC_PROCESS                         | 0.81 | 0.15 | 0 | 0 | 0 | not significant |

|      |                                                                     |      |      |   |   |   |                 |
|------|---------------------------------------------------------------------|------|------|---|---|---|-----------------|
| 7074 | GO_Glutamate_Secretion                                              | 0.81 | 0.15 | 0 | 0 | 0 | not significant |
| 7075 | GO_Hindbrain_Radial_Glia_Guided_Cell_Migration                      | 0.81 | 0.15 | 0 | 0 | 0 | not significant |
| 7076 | GO_Jun_Kinase_Binding                                               | 0.81 | 0.15 | 0 | 0 | 0 | not significant |
| 7077 | GO_Microtubule_Anchoring_At_Centrosome                              | 0.81 | 0.15 | 0 | 0 | 0 | not significant |
| 7078 | GO_Nucleotidase_Activity                                            | 0.81 | 0.15 | 0 | 0 | 0 | not significant |
| 7079 | Reactome_Sos_Mediated_Signaling                                     | 0.81 | 0.15 | 0 | 0 | 0 | not significant |
| 7080 | Reactome_SUMO_Is_Transferred_From_E1_To_E2_UBE2L_UBC9               | 0.81 | 0.15 | 0 | 0 | 0 | not significant |
| 7081 | Reactome_Synthesis_of_5_Eicosatetraenoic_Acids                      | 0.81 | 0.15 | 0 | 0 | 0 | not significant |
| 7082 | SESTO_Response_To_UV_C4                                             | 0.81 | 0.15 | 0 | 0 | 0 | not significant |
| 7083 | TCGA_Glioblastoma_Mutated                                           | 0.81 | 0.15 | 0 | 0 | 0 | not significant |
| 7084 | CHR2P16                                                             | 0.81 | 0.14 | 0 | 0 | 0 | not significant |
| 7085 | GO_Eye_Photorceptor_Cell_Development                                | 0.81 | 0.14 | 0 | 0 | 0 | not significant |
| 7086 | GO_Mismatched_DNA_Binding                                           | 0.81 | 0.14 | 0 | 0 | 0 | not significant |
| 7087 | GO_Negative_Regulation_of_Myosin_Light_Chain_Phosphatase_Activity   | 0.81 | 0.14 | 0 | 0 | 0 | not significant |
| 7088 | GO_Positive_Regulation_of_Filopodium_Assembly                       | 0.81 | 0.14 | 0 | 0 | 0 | not significant |
| 7089 | GO_Positive_Regulation_of_Insulin_Secretion_Involved_in_Cellular_Re | 0.81 | 0.14 | 0 | 0 | 0 | not significant |
| 7090 | GO_Proton_Transporting_Two_Sector_ATPase_Complex                    | 0.81 | 0.14 | 0 | 0 | 0 | not significant |
| 7091 | GO_Regulation_of_Mast_Cell_Activation                               | 0.81 | 0.14 | 0 | 0 | 0 | not significant |
| 7092 | GOERING_Blood_HDL_Cholesterol_QTL_CIS                               | 0.81 | 0.14 | 0 | 0 | 0 | not significant |
| 7093 | HALLMARK_Angiogenesis                                               | 0.81 | 0.14 | 0 | 0 | 0 | not significant |
| 7094 | HENDRICKS_SMARCA4_Targets_DN                                        | 0.81 | 0.14 | 0 | 0 | 0 | not significant |
| 7095 | MIZUSHIMA_Autophagosome_Formation                                   | 0.81 | 0.14 | 0 | 0 | 0 | not significant |
| 7096 | ONGUSAHA_BRCA1_Targets_UP                                           | 0.81 | 0.14 | 0 | 0 | 0 | not significant |
| 7097 | Reactome_GDP_Fucose_Biosynthesis                                    | 0.81 | 0.14 | 0 | 0 | 0 | not significant |
| 7098 | YAO_Temporal_Response_To_Progesterone_Cluster_3                     | 0.81 | 0.14 | 0 | 0 | 0 | not significant |
| 7099 | BOYLAN_MULTIPLE_Myeloma_D_Cluster_UP                                | 0.81 | 0.13 | 0 | 0 | 0 | not significant |
| 7100 | CHR1Q24                                                             | 0.81 | 0.13 | 0 | 0 | 0 | not significant |
| 7101 | GO_Cell_Migration_in_Hindbrain                                      | 0.81 | 0.13 | 0 | 0 | 0 | not significant |
| 7102 | GO_Endocrine_Hormone_Secretion                                      | 0.81 | 0.13 | 0 | 0 | 0 | not significant |
| 7103 | GO_O_Glycan_Processing                                              | 0.81 | 0.13 | 0 | 0 | 0 | not significant |
| 7104 | GO_SRP_Dependent_Cotranslational_Protein_Targeting_To_Membrane      | 0.81 | 0.13 | 0 | 0 | 0 | not significant |
| 7105 | STEARMAN_Lung_Cancer_Early_Vs_Late_DN                               | 0.81 | 0.13 | 0 | 0 | 0 | not significant |
| 7106 | GO_Multivesicular_Body_Sorting_Pathway                              | 0.81 | 0.12 | 0 | 0 | 0 | not significant |
| 7107 | GO_Negative_Regulation_of_Histone_Modification                      | 0.81 | 0.12 | 0 | 0 | 0 | not significant |
| 7108 | GO_SH3_SH2_Adaptor_Activity                                         | 0.81 | 0.12 | 0 | 0 | 0 | not significant |
| 7109 | KENNY_CTNNB1_Targets_DN                                             | 0.81 | 0.12 | 0 | 0 | 0 | not significant |
| 7110 | Reactome_Lysosome_Vesicle_Biogenesis                                | 0.81 | 0.12 | 0 | 0 | 0 | not significant |
| 7111 | SHETH_Liver_Cancer_Vs_TXNIP_Loss_PAMS                               | 0.81 | 0.12 | 0 | 0 | 0 | not significant |
| 7112 | WOO_Liver_Cancer_Recurrence_DN                                      | 0.81 | 0.12 | 0 | 0 | 0 | not significant |
| 7113 | GO_Iron_Ion_Transport                                               | 0.81 | 0.11 | 0 | 0 | 0 | not significant |
| 7114 | GO_Receptor_Tyrosine_Kinase_Binding                                 | 0.81 | 0.11 | 0 | 0 | 0 | not significant |
| 7115 | GO_Regulation_of_Mitochondrial_Membrane_Potential                   | 0.81 | 0.11 | 0 | 0 | 0 | not significant |
| 7116 | GO_Syntaxin_Binding                                                 | 0.81 | 0.11 | 0 | 0 | 0 | not significant |
| 7117 | HEDENFALK_Breast_Cancer_Hereditary_Vs_Sporadic                      | 0.81 | 0.11 | 0 | 0 | 0 | not significant |
| 7118 | KEGG_CARDIAC_Muscle_Contraction                                     | 0.81 | 0.11 | 0 | 0 | 0 | not significant |
| 7119 | KEGG_PANCREATIC_CANCER                                              | 0.81 | 0.11 | 0 | 0 | 0 | not significant |
| 7120 | CHR10Q26                                                            | 0.81 | 0.1  | 0 | 0 | 0 | not significant |
| 7121 | GO_Exonuclease_Activity                                             | 0.81 | 0.1  | 0 | 0 | 0 | not significant |
| 7122 | KAYO_Calorie_Restriction_Muscle_DN                                  | 0.81 | 0.1  | 0 | 0 | 0 | not significant |
| 7123 | KEGG_PEROXSOME                                                      | 0.81 | 0.1  | 0 | 0 | 0 | not significant |
| 7124 | GO_Ciliary_Basal_Body                                               | 0.81 | 0.09 | 0 | 0 | 0 | not significant |
| 7125 | GO_Negative_Regulation_of_Protein_Catabolic_Process                 | 0.81 | 0.09 | 0 | 0 | 0 | not significant |
| 7126 | GO_Positive_Regulation_of_Cysteine_Type_Endopeptidase_Activity      | 0.81 | 0.09 | 0 | 0 | 0 | not significant |
| 7127 | MORI_SMALL_PRE_BIL_Lymphocyte_DN                                    | 0.81 | 0.09 | 0 | 0 | 0 | not significant |
| 7128 | GO_Pigment_Granule                                                  | 0.81 | 0.08 | 0 | 0 | 0 | not significant |
| 7129 | GO_Actomyosin_Structure_Organization                                | 0.81 | 0.07 | 0 | 0 | 0 | not significant |
| 7130 | WAMUNYOKOLI_Ovarian_Cancer_Grades_1_2_UP                            | 0.81 | 0.07 | 0 | 0 | 0 | not significant |
| 7131 | BONOME_Ovarian_Cancer_Survival_Optimal_Debulking                    | 0.81 | 0.06 | 0 | 0 | 0 | not significant |
| 7132 | RIGGINS_Tamoxifen_Resistance_DN                                     | 0.81 | 0.06 | 0 | 0 | 0 | not significant |
| 7133 | GO_Skeletal_System_Development                                      | 0.81 | 0.05 | 0 | 0 | 0 | not significant |
| 7134 | GO_Positive_Regulation_of_Catabolic_Process                         | 0.81 | 0.03 | 0 | 0 | 0 | not significant |
| 7135 | GO_Postsynapse                                                      | 0.81 | 0.03 | 0 | 0 | 0 | not significant |
| 7136 | GO_Sensory_Perception_of_Smell                                      | 0.82 | 0.18 | 0 | 0 | 0 | not significant |
| 7137 | CUI_TCF21_Targets_UP                                                | 0.82 | 0.17 | 0 | 0 | 0 | not significant |
| 7138 | GO_Cellular_Potassium_Ion_Homeostasis                               | 0.82 | 0.17 | 0 | 0 | 0 | not significant |
| 7139 | GO_Regulation_of_Dendrite_Extension                                 | 0.82 | 0.17 | 0 | 0 | 0 | not significant |
| 7140 | GO_Semaphorin_Receptor_Activity                                     | 0.82 | 0.17 | 0 | 0 | 0 | not significant |
| 7141 | GO_UDP_N_Acetylglucosamine_Biosynthetic_Process                     | 0.82 | 0.17 | 0 | 0 | 0 | not significant |
| 7142 | GO_Chemoattractant_Activity                                         | 0.82 | 0.16 | 0 | 0 | 0 | not significant |
| 7143 | GO_Dopamine_Secretion                                               | 0.82 | 0.16 | 0 | 0 | 0 | not significant |
| 7144 | GO_Extracellular_Matrix_Assembly                                    | 0.82 | 0.16 | 0 | 0 | 0 | not significant |
| 7145 | GO_Fat_Soluble_Vitamin_Biosynthetic_Process                         | 0.82 | 0.16 | 0 | 0 | 0 | not significant |
| 7146 | GO_Intermembrane_Lipid_Transfer_Activity                            | 0.82 | 0.16 | 0 | 0 | 0 | not significant |
| 7147 | GO_Keratan_Sulfate_Biosynthetic_Process                             | 0.82 | 0.16 | 0 | 0 | 0 | not significant |
| 7148 | GO_Positive_Regulation_of_T_Cell_Receptor_Signaling_Pathway         | 0.82 | 0.16 | 0 | 0 | 0 | not significant |
| 7149 | GO_Semaphorin_Plexin_Signaling_Pathway_Involved_in_Neuron_Project   | 0.82 | 0.16 | 0 | 0 | 0 | not significant |
| 7150 | GO_SWI_SNF_Complex                                                  | 0.82 | 0.16 | 0 | 0 | 0 | not significant |
| 7151 | RICKMAN_Head_and_Neck_Cancer_E                                      | 0.82 | 0.16 | 0 | 0 | 0 | not significant |
| 7152 | YANG_MUC2_Targets_Duodenum_6MO_DN                                   | 0.82 | 0.16 | 0 | 0 | 0 | not significant |
| 7153 | BIOCARTA_Biopeptides_Pathway                                        | 0.82 | 0.15 | 0 | 0 | 0 | not significant |
| 7154 | BIOCARTA_DICER_Pathway                                              | 0.82 | 0.15 | 0 | 0 | 0 | not significant |
| 7155 | CHR18Q11                                                            | 0.82 | 0.15 | 0 | 0 | 0 | not significant |
| 7156 | CHR5Q21                                                             | 0.82 | 0.15 | 0 | 0 | 0 | not significant |
| 7157 | CROMER_Tumorigenesis_UP                                             | 0.82 | 0.15 | 0 | 0 | 0 | not significant |
| 7158 | GAUSSMANN_MLL_AF4_Fusion_Targets_F_DN                               | 0.82 | 0.15 | 0 | 0 | 0 | not significant |
| 7159 | GO_Histone_H2A_Monoubiquitination                                   | 0.82 | 0.15 | 0 | 0 | 0 | not significant |
| 7160 | GO_Midbody_Abscission                                               | 0.82 | 0.15 | 0 | 0 | 0 | not significant |
| 7161 | GO_RIG_I_Signaling_Pathway                                          | 0.82 | 0.15 | 0 | 0 | 0 | not significant |
| 7162 | GO_WNT_Signaling_Pathway_CALCIIUM_Modulating_Pathway                | 0.82 | 0.15 | 0 | 0 | 0 | not significant |
| 7163 | MEISSNER_ES_ICP_WITH_H3K4ME3                                        | 0.82 | 0.15 | 0 | 0 | 0 | not significant |
| 7164 | OXFORD_RALA_OR_RALB_Targets_DN                                      | 0.82 | 0.15 | 0 | 0 | 0 | not significant |
| 7165 | PARK_TRETINOIN_Response_and_PML_RARA_Fusion                         | 0.82 | 0.15 | 0 | 0 | 0 | not significant |
| 7166 | Reactome_P75NTR_Regulates_Axonogenesis                              | 0.82 | 0.15 | 0 | 0 | 0 | not significant |
| 7167 | Reactome_Synthesis_of_UDP_N_Acetylglucosamine                       | 0.82 | 0.15 | 0 | 0 | 0 | not significant |
| 7168 | Reactome_Traf6_Mediated_NF_KB_Activation                            | 0.82 | 0.15 | 0 | 0 | 0 | not significant |
| 7169 | BIOCARTA_PPARA_Pathway                                              | 0.82 | 0.14 | 0 | 0 | 0 | not significant |
| 7170 | BOHN_PRIMARY_IMMUNODEFICIENCY_SYNDROM_DN                            | 0.82 | 0.14 | 0 | 0 | 0 | not significant |
| 7171 | GO_HSP70_Protein_Binding                                            | 0.82 | 0.14 | 0 | 0 | 0 | not significant |
| 7172 | GO_INTERLEUKIN_6_Mediated_Signaling_Pathway                         | 0.82 | 0.14 | 0 | 0 | 0 | not significant |
| 7173 | GO_MIRNA_Mediated_Inhibition_of_Translation                         | 0.82 | 0.14 | 0 | 0 | 0 | not significant |
| 7174 | GO_Nucleoside_Metabolic_Process                                     | 0.82 | 0.14 | 0 | 0 | 0 | not significant |
| 7175 | GO_Proton_Exporting_ATPase_Activity                                 | 0.82 | 0.14 | 0 | 0 | 0 | not significant |
| 7176 | GO_Regulation_of_Endothelial_Cell_Differentiation                   | 0.82 | 0.14 | 0 | 0 | 0 | not significant |
| 7177 | KEGG_INOSITOL_PHOSPHATE_METABOLISM                                  | 0.82 | 0.14 | 0 | 0 | 0 | not significant |
| 7178 | NIKOLSKY_Breast_Cancer_20Q11_Amplicon                               | 0.82 | 0.14 | 0 | 0 | 0 | not significant |
| 7179 | Reactome_Potassium_Channels                                         | 0.82 | 0.14 | 0 | 0 | 0 | not significant |
| 7180 | ENGELMANN_Cancer_Progenitors_DN                                     | 0.82 | 0.13 | 0 | 0 | 0 | not significant |
| 7181 | GO_Histone_H3_Acetylation                                           | 0.82 | 0.13 | 0 | 0 | 0 | not significant |
| 7182 | GO_Nucleotide_Excision_Repair_DNA_Incision                          | 0.82 | 0.13 | 0 | 0 | 0 | not significant |

|      |                                                                   |      |      |   |   |   |                 |
|------|-------------------------------------------------------------------|------|------|---|---|---|-----------------|
| 7183 | GO_PRESYNAPTIC_ENDOCYTOSIS                                        | 0.82 | 0.13 | 0 | 0 | 0 | not significant |
| 7184 | GO_TRANSCRIPTION_COFACTOR_BINDING                                 | 0.82 | 0.13 | 0 | 0 | 0 | not significant |
| 7185 | SCIAN_INVERSED_TARGETS_OF_TP53_AND_TP73_DN                        | 0.82 | 0.13 | 0 | 0 | 0 | not significant |
| 7186 | BCAT_BILD_ET_AL_DN                                                | 0.82 | 0.12 | 0 | 0 | 0 | not significant |
| 7187 | FONTAINE_PAPILLARY_THYROID_CARCIOMA_UP                            | 0.82 | 0.12 | 0 | 0 | 0 | not significant |
| 7188 | GOLUB_ALL_VS_AML_UP                                               | 0.82 | 0.12 | 0 | 0 | 0 | not significant |
| 7189 | HOLLERN_EMT_BREAST_TUMOR_DN                                       | 0.82 | 0.12 | 0 | 0 | 0 | not significant |
| 7190 | GO_CELL_DEATH_IN_RESPONSE_TO_OXIDATIVE_STRESS                     | 0.82 | 0.11 | 0 | 0 | 0 | not significant |
| 7191 | GO_ENDOCRINE_SYSTEM_DEVELOPMENT                                   | 0.82 | 0.11 | 0 | 0 | 0 | not significant |
| 7192 | GO_EXECUTION_PHASE_OF_APOPTOSIS                                   | 0.82 | 0.11 | 0 | 0 | 0 | not significant |
| 7193 | GO_NEGATIVE_REGULATION_OF_VIRAL_PROCESS                           | 0.82 | 0.11 | 0 | 0 | 0 | not significant |
| 7194 | KEGG_PHOSPHATIDYLINOSITOL_SIGNALING_SYSTEM                        | 0.82 | 0.11 | 0 | 0 | 0 | not significant |
| 7195 | RB_P130_DN.V1_DN                                                  | 0.82 | 0.1  | 0 | 0 | 0 | not significant |
| 7196 | ZHANG_BREAST_CANCER_PROGENITORS_DN                                | 0.82 | 0.1  | 0 | 0 | 0 | not significant |
| 7197 | GO_NEURON_PROJECTION_EXTENSION                                    | 0.82 | 0.09 | 0 | 0 | 0 | not significant |
| 7198 | GO_POSITIVE_REGULATION_OF_ION_TRANSPORT                           | 0.82 | 0.09 | 0 | 0 | 0 | not significant |
| 7199 | GO_TOR_SIGNALING                                                  | 0.82 | 0.09 | 0 | 0 | 0 | not significant |
| 7200 | HALLMARK_DNA_REPAIR                                               | 0.82 | 0.09 | 0 | 0 | 0 | not significant |
| 7201 | GO_REGULATION_OF_CARBOHYDRATE_METABOLIC_PROCESS                   | 0.82 | 0.08 | 0 | 0 | 0 | not significant |
| 7202 | PROVENZANI_METASTASIS_UP                                          | 0.82 | 0.08 | 0 | 0 | 0 | not significant |
| 7203 | GO_POSITIVE_REGULATION_OF_CELL_PROJECTION_ORGANIZATION            | 0.82 | 0.05 | 0 | 0 | 0 | not significant |
| 7204 | CONRAD_GERMLINE_STEM_CELL                                         | 0.83 | 0.18 | 0 | 0 | 0 | not significant |
| 7205 | GO_REGULATION_OF_T_HELPER_17_TYPE_IMMUNE_RESPONSE                 | 0.83 | 0.18 | 0 | 0 | 0 | not significant |
| 7206 | REACTOME_GRB2_EVENTS_IN_ERBB2_SIGNALING                           | 0.83 | 0.18 | 0 | 0 | 0 | not significant |
| 7207 | GO_CAVEOLIN_MEDIATED_ENDOCYTOSIS                                  | 0.83 | 0.17 | 0 | 0 | 0 | not significant |
| 7208 | GO_COLLAGEN_TRIMER                                                | 0.83 | 0.17 | 0 | 0 | 0 | not significant |
| 7209 | GO_I_KAPPAB_PHOSPHORYLATION                                       | 0.83 | 0.17 | 0 | 0 | 0 | not significant |
| 7210 | GO_LONG_CHAIN_FATTY_ACID_IMPORT_INTO_CELL                         | 0.83 | 0.17 | 0 | 0 | 0 | not significant |
| 7211 | GO_NEGATIVE_REGULATION_OF_HISTONE_ACETYLTATION                    | 0.83 | 0.17 | 0 | 0 | 0 | not significant |
| 7212 | GO_PLATELET_DERIVED_GROWTH_FACTOR_RECEPTOR_BETA_SIGNALING_PATH    | 0.83 | 0.17 | 0 | 0 | 0 | not significant |
| 7213 | GO_PROTEIN_LIPID_COMPLEX_SUBUNIT_ORGANIZATION                     | 0.83 | 0.17 | 0 | 0 | 0 | not significant |
| 7214 | GO_PROTEIN_LOCALIZATION_TO_ENDOPLASMIC_RETICULUM_EXT_SITE         | 0.83 | 0.17 | 0 | 0 | 0 | not significant |
| 7215 | GO_REGULATION_OF_MACROPHAGE_CHEMOTAXIS                            | 0.83 | 0.17 | 0 | 0 | 0 | not significant |
| 7216 | GO_REGULATION_OF_SYNAPTIC_TRANSMISSION_DOPAMINERGIC               | 0.83 | 0.17 | 0 | 0 | 0 | not significant |
| 7217 | PIONTEK_PKD1_TARGETS_UP                                           | 0.83 | 0.17 | 0 | 0 | 0 | not significant |
| 7218 | REACTOME_FERTILIZATION                                            | 0.83 | 0.17 | 0 | 0 | 0 | not significant |
| 7219 | REACTOME_KERATAN_SULFATE_BIOSYNTHESIS                             | 0.83 | 0.17 | 0 | 0 | 0 | not significant |
| 7220 | STEINER_ERYTHROCYTE_MEMBRANE_GENES                                | 0.83 | 0.17 | 0 | 0 | 0 | not significant |
| 7221 | BANDRES_RESPONSE_TO_CARMUSTIN_WITHOUT_MGMT_24HR_DN                | 0.83 | 0.16 | 0 | 0 | 0 | not significant |
| 7222 | BIOCARTA_CARM_ER_PATHWAY                                          | 0.83 | 0.16 | 0 | 0 | 0 | not significant |
| 7223 | BIOCARTA_MITOCHONDRIA_PATHWAY                                     | 0.83 | 0.16 | 0 | 0 | 0 | not significant |
| 7224 | BIOCARTA_RB_PATHWAY                                               | 0.83 | 0.16 | 0 | 0 | 0 | not significant |
| 7225 | GO_COHESIN_COMPLEX                                                | 0.83 | 0.16 | 0 | 0 | 0 | not significant |
| 7226 | GO_FIBROBLAST_GROWTH_FACTOR_BINDING                               | 0.83 | 0.16 | 0 | 0 | 0 | not significant |
| 7227 | GO_HEME_BIOSYNTHETIC_PROCESS                                      | 0.83 | 0.16 | 0 | 0 | 0 | not significant |
| 7228 | GO_LSM2_8_COMPLEX                                                 | 0.83 | 0.16 | 0 | 0 | 0 | not significant |
| 7229 | GO_LYS63_SPECIFIC_DEUBIQUITINASE_ACTIVITY                         | 0.83 | 0.16 | 0 | 0 | 0 | not significant |
| 7230 | GO_NEGATIVE_REGULATION_OF_RECEPTOR_MEDIATED_ENDOCYTOSIS           | 0.83 | 0.16 | 0 | 0 | 0 | not significant |
| 7231 | GO_RECEPTOR_SERINE_THREONINE_KINASE_BINDING                       | 0.83 | 0.16 | 0 | 0 | 0 | not significant |
| 7232 | GO_REGULATION_OF_B_CELL_RECEPTOR_SIGNALING_PATHWAY                | 0.83 | 0.16 | 0 | 0 | 0 | not significant |
| 7233 | GO_REGULATION_OF_GOLGI_ORGANIZATION                               | 0.83 | 0.16 | 0 | 0 | 0 | not significant |
| 7234 | GO_SEMAPHORIN_RECEPTOR_COMPLEX                                    | 0.83 | 0.16 | 0 | 0 | 0 | not significant |
| 7235 | GO_SMC5_SMC6_COMPLEX                                              | 0.83 | 0.16 | 0 | 0 | 0 | not significant |
| 7236 | GO_VENOUS_BLOOD_VESSEL_MORPHOGENESIS                              | 0.83 | 0.16 | 0 | 0 | 0 | not significant |
| 7237 | GOLUB_ALL_VS_AML_DN                                               | 0.83 | 0.16 | 0 | 0 | 0 | not significant |
| 7238 | KANG_AR_TARGETS_UP                                                | 0.83 | 0.16 | 0 | 0 | 0 | not significant |
| 7239 | PARK_APL_PATHOGENESIS_UP                                          | 0.83 | 0.16 | 0 | 0 | 0 | not significant |
| 7240 | REACTOME_PURINE_CATABOLISM                                        | 0.83 | 0.16 | 0 | 0 | 0 | not significant |
| 7241 | BIOCARTA_PAR1_PATHWAY                                             | 0.83 | 0.15 | 0 | 0 | 0 | not significant |
| 7242 | GO_CELL_FATE_SPECIFICATION                                        | 0.83 | 0.15 | 0 | 0 | 0 | not significant |
| 7243 | GO_DNA_CATABOLIC_PROCESS_ENDONUCLEOLYTIC                          | 0.83 | 0.15 | 0 | 0 | 0 | not significant |
| 7244 | GO_REGULATION_OF_EXTRACELLULAR_MATRIX_ORGANIZATION                | 0.83 | 0.15 | 0 | 0 | 0 | not significant |
| 7245 | GO_RESPONSE_TO_INTERFERON_BETA                                    | 0.83 | 0.15 | 0 | 0 | 0 | not significant |
| 7246 | GO_VOLTAGE_GATED_CALCIIUM_CHANNEL_ACTIVITY                        | 0.83 | 0.15 | 0 | 0 | 0 | not significant |
| 7247 | KAAB_FAILED_HEART_VENTRICLE_DN                                    | 0.83 | 0.15 | 0 | 0 | 0 | not significant |
| 7248 | KEGG_NOTCH_SIGNALING_PATHWAY                                      | 0.83 | 0.15 | 0 | 0 | 0 | not significant |
| 7249 | REACTOME_SIGNALING_BY_HIPPO                                       | 0.83 | 0.15 | 0 | 0 | 0 | not significant |
| 7250 | SHETH_LIVER_CANCER_VS_TXNP_LOSS_PAM6                              | 0.83 | 0.15 | 0 | 0 | 0 | not significant |
| 7251 | XU_HGF_SIGNALING_NOT_VIA_AKT1_6HR                                 | 0.83 | 0.15 | 0 | 0 | 0 | not significant |
| 7252 | ANDERSEN_LIVER_CANCER_KRT19_UP                                    | 0.83 | 0.14 | 0 | 0 | 0 | not significant |
| 7253 | BREDEMEYER_RAG_SIGNALING_NOT_VIA_ATM_UP                           | 0.83 | 0.14 | 0 | 0 | 0 | not significant |
| 7254 | GO_CELL_CELL_ADHESION_MEDIATOR_ACTIVITY                           | 0.83 | 0.14 | 0 | 0 | 0 | not significant |
| 7255 | GO_NEGATIVE_REGULATION_OF_CHROMATIN_ORGANIZATION                  | 0.83 | 0.14 | 0 | 0 | 0 | not significant |
| 7256 | GO_NUCLEOBASE_CONTAINING_COMPOUND_KINASE_ACTIVITY                 | 0.83 | 0.14 | 0 | 0 | 0 | not significant |
| 7257 | GO_REGULATION_OF_SODIUM_ION_TRANSMEMBRANE_TRANSPORT               | 0.83 | 0.14 | 0 | 0 | 0 | not significant |
| 7258 | GO_RESPONSE_TO_NICOTINE                                           | 0.83 | 0.14 | 0 | 0 | 0 | not significant |
| 7259 | PID_CASPASE_PATHWAY                                               | 0.83 | 0.14 | 0 | 0 | 0 | not significant |
| 7260 | REACTOME_G1_PHASE                                                 | 0.83 | 0.14 | 0 | 0 | 0 | not significant |
| 7261 | GO_ENERGY_RESERVE_METABOLIC_PROCESS                               | 0.83 | 0.13 | 0 | 0 | 0 | not significant |
| 7262 | GO_EXOCYTTIC_PROCESS                                              | 0.83 | 0.13 | 0 | 0 | 0 | not significant |
| 7263 | GO_GLYCOSYL_COMPOUND_METABOLIC_PROCESS                            | 0.83 | 0.13 | 0 | 0 | 0 | not significant |
| 7264 | GO GRANULOCYTE MIGRATION                                          | 0.83 | 0.13 | 0 | 0 | 0 | not significant |
| 7265 | ZHONG_SECRETOME_OF_LUNG_CANCER_AND_MACROPHAGE                     | 0.83 | 0.13 | 0 | 0 | 0 | not significant |
| 7266 | GO_ACTIN_FILAMENT_BASED_MOVEMENT                                  | 0.83 | 0.12 | 0 | 0 | 0 | not significant |
| 7267 | GO_MICROBODY_PART                                                 | 0.83 | 0.12 | 0 | 0 | 0 | not significant |
| 7268 | GO_NEGATIVE_REGULATION_OF_CYSSTEINE_TYPE_ENDOPEPTIDASE_ACTIVITY   | 0.83 | 0.12 | 0 | 0 | 0 | not significant |
| 7269 | PID_CMYB_PATHWAY                                                  | 0.83 | 0.12 | 0 | 0 | 0 | not significant |
| 7270 | CHR13Q14                                                          | 0.83 | 0.11 | 0 | 0 | 0 | not significant |
| 7271 | GO_CHROMATIN_ORGANIZATION_INVOLVED_IN_REGULATION_OF_TRANSCRIPTION | 0.83 | 0.1  | 0 | 0 | 0 | not significant |
| 7272 | KEGG_CALCIIUM_SIGNALING_PATHWAY                                   | 0.83 | 0.1  | 0 | 0 | 0 | not significant |
| 7273 | WATANABE_RECTAL_CANCER_RADIOOTHERAPY_RESPONSIVE_UP                | 0.83 | 0.1  | 0 | 0 | 0 | not significant |
| 7274 | ESC_V6.5_UP_EARLY.V1_UP                                           | 0.83 | 0.09 | 0 | 0 | 0 | not significant |
| 7275 | GO_CELL_MATRIX_ADHESION                                           | 0.83 | 0.09 | 0 | 0 | 0 | not significant |
| 7276 | GO_HISTONE_BINDING                                                | 0.83 | 0.08 | 0 | 0 | 0 | not significant |
| 7277 | MULLIGHAN_NPM1_MUTATED_SIGNATURE_1_UP                             | 0.83 | 0.08 | 0 | 0 | 0 | not significant |
| 7278 | GO_POSITIVE_REGULATION_OF_NEURON_DIFFERENTIATION                  | 0.83 | 0.06 | 0 | 0 | 0 | not significant |
| 7279 | GO_IN_UTERO_EMBRYONIC_DEVELOPMENT                                 | 0.83 | 0.05 | 0 | 0 | 0 | not significant |
| 7280 | GO_SYNAPTIC_SIGNALING                                             | 0.83 | 0.05 | 0 | 0 | 0 | not significant |
| 7281 | GO_CELL_PROJECTION_ASSEMBLY                                       | 0.83 | 0.04 | 0 | 0 | 0 | not significant |
| 7282 | BIOCARTA_PGC1A_PATHWAY                                            | 0.84 | 0.19 | 0 | 0 | 0 | not significant |
| 7283 | FERRARI_RESPONSE_TO_FENRETINIDE_UP                                | 0.84 | 0.18 | 0 | 0 | 0 | not significant |
| 7284 | GO_NADPH_BINDING                                                  | 0.84 | 0.18 | 0 | 0 | 0 | not significant |
| 7285 | GO_NEGATIVE_REGULATION_OF_MONOOXYGENASE_ACTIVITY                  | 0.84 | 0.18 | 0 | 0 | 0 | not significant |
| 7286 | GO_PHOSPHATIDYLGLYCEROL_BINDING                                   | 0.84 | 0.18 | 0 | 0 | 0 | not significant |
| 7287 | GO_POSITIVE_REGULATION_OF_STEM_CELL_PROLIFERATION                 | 0.84 | 0.18 | 0 | 0 | 0 | not significant |
| 7288 | GO_REGULATION_OF_CYTOPLASMIC_MRNA_PROCESSING_BODY_ASSEMBLY        | 0.84 | 0.18 | 0 | 0 | 0 | not significant |
| 7289 | GO_REGULATION_OF_TUBULIN_DEACETYLTATION                           | 0.84 | 0.18 | 0 | 0 | 0 | not significant |
| 7290 | KALMA_E2F1_TARGETS                                                | 0.84 | 0.18 | 0 | 0 | 0 | not significant |
| 7291 | BERTUCCI_INVASIVE_CARCIOMA_DUCTAL_VS_LOBULAR_DN                   | 0.84 | 0.17 | 0 | 0 | 0 | not significant |

|      |                                                                     |      |      |   |   |   |                 |
|------|---------------------------------------------------------------------|------|------|---|---|---|-----------------|
| 7292 | GO_DNA_REPLICATION_FACTOR_A_COMPLEX                                 | 0.84 | 0.17 | 0 | 0 | 0 | not significant |
| 7293 | GO_KERATAN_SULFATE_CATABOLIC_PROCESS                                | 0.84 | 0.17 | 0 | 0 | 0 | not significant |
| 7294 | GO_MHC_CLASS_II_BIOSYNTHETIC_PROCESS                                | 0.84 | 0.17 | 0 | 0 | 0 | not significant |
| 7295 | GO_NEGATIVE_REGULATION_OF_BMP_SIGNALING_PATHWAY                     | 0.84 | 0.17 | 0 | 0 | 0 | not significant |
| 7296 | GO_NEGATIVE_REGULATION_OF_LONG_TERM_SYNAPTIC_POTENTIATION           | 0.84 | 0.17 | 0 | 0 | 0 | not significant |
| 7297 | GO_OMEGA_PEPTIDASE_ACTIVITY                                         | 0.84 | 0.17 | 0 | 0 | 0 | not significant |
| 7298 | GO_POSITIVE_REGULATION_OF_MEIOTIC_CELL_CYCLE                        | 0.84 | 0.17 | 0 | 0 | 0 | not significant |
| 7299 | GO_POSITIVE_REGULATION_OF_NAD_P_H_OXIDASE_ACTIVITY                  | 0.84 | 0.17 | 0 | 0 | 0 | not significant |
| 7300 | GO_PRESYNAPTIC_ACTIVE_ZONE_CYTOPLASMIC_COMPONENT                    | 0.84 | 0.17 | 0 | 0 | 0 | not significant |
| 7301 | GO_REGULATION_OF_AMYLOID_BETA_FORMATION                             | 0.84 | 0.17 | 0 | 0 | 0 | not significant |
| 7302 | GO_RESPONSE_TO_ANGIOTENSIN                                          | 0.84 | 0.17 | 0 | 0 | 0 | not significant |
| 7303 | GO_WNT_ACTIVATED_RECEPTOR_ACTIVITY                                  | 0.84 | 0.17 | 0 | 0 | 0 | not significant |
| 7304 | NELSON_RESPONSE_TO_ANDROGEN_DN                                      | 0.84 | 0.17 | 0 | 0 | 0 | not significant |
| 7305 | REACTOME_ATF4_ACTIVATES_GENES_IN_RESPONSE_TO_ENDOPLASMIC_RETICULUM  | 0.84 | 0.17 | 0 | 0 | 0 | not significant |
| 7306 | REACTOME_IRAK1_RECRUITS_IKK_COMPLEX                                 | 0.84 | 0.17 | 0 | 0 | 0 | not significant |
| 7307 | BALLIF_DEVELOPMENTAL_DISABILITY_P16_P12_DELETION                    | 0.84 | 0.16 | 0 | 0 | 0 | not significant |
| 7308 | BIOCARTA_RACC_PATHWAY                                               | 0.84 | 0.16 | 0 | 0 | 0 | not significant |
| 7309 | CHR11Q21                                                            | 0.84 | 0.16 | 0 | 0 | 0 | not significant |
| 7310 | GO_CALCIUM_DEPENDENT_CYSSTEINE_TYPE_ENDOPEPTIDASE_ACTIVITY          | 0.84 | 0.16 | 0 | 0 | 0 | not significant |
| 7311 | GO_CEREBRAL_CORTEX_RADIIALLY_ORIENTED_CELL_MIGRATION                | 0.84 | 0.16 | 0 | 0 | 0 | not significant |
| 7312 | GO_COLLAGEN_BIOSYNTHETIC_PROCESS                                    | 0.84 | 0.16 | 0 | 0 | 0 | not significant |
| 7313 | GO_GALACTOSYLTRANSFERASE_ACTIVITY                                   | 0.84 | 0.16 | 0 | 0 | 0 | not significant |
| 7314 | GO_POSITIVE_REGULATION_OF_LIGASE_ACTIVITY                           | 0.84 | 0.16 | 0 | 0 | 0 | not significant |
| 7315 | GO_PROTEIN_LIPID_COMPLEX_ASSEMBLY                                   | 0.84 | 0.16 | 0 | 0 | 0 | not significant |
| 7316 | GO_REGULATION_OF_ESTABLISHMENT_OR_MAINTENANCE_OF_CELL_POLARITY      | 0.84 | 0.16 | 0 | 0 | 0 | not significant |
| 7317 | GO_REGULATION_OF_NAD_P_H_OXIDASE_ACTIVITY                           | 0.84 | 0.16 | 0 | 0 | 0 | not significant |
| 7318 | GO_T_CELL_TOLERANCE_INDUCTION                                       | 0.84 | 0.16 | 0 | 0 | 0 | not significant |
| 7319 | HOWLIN_CITED1_TARGETS_1_DN                                          | 0.84 | 0.16 | 0 | 0 | 0 | not significant |
| 7320 | LUI_TARGETS_OF_PAX8_PPARG_FUSION                                    | 0.84 | 0.16 | 0 | 0 | 0 | not significant |
| 7321 | REACTOME_REGULATION_OF_PTEN_MRNA_TRANSLATION                        | 0.84 | 0.16 | 0 | 0 | 0 | not significant |
| 7322 | REACTOME_TLR3_MEDIATED_TICAM1_DEPENDENT_PROGRAMMED_CELL_DEATH       | 0.84 | 0.16 | 0 | 0 | 0 | not significant |
| 7323 | REICHERT_G1S_REGULATORS_AS_PI3K_TARGETS                             | 0.84 | 0.16 | 0 | 0 | 0 | not significant |
| 7324 | STANELLE_E2F1_TARGETS                                               | 0.84 | 0.16 | 0 | 0 | 0 | not significant |
| 7325 | WANG_METASTASIS_OF_BREAST_CANCER_ESR1_DN                            | 0.84 | 0.16 | 0 | 0 | 0 | not significant |
| 7326 | CASTELLANO_NRAS_TARGETS_UP                                          | 0.84 | 0.15 | 0 | 0 | 0 | not significant |
| 7327 | CHR11P12                                                            | 0.84 | 0.15 | 0 | 0 | 0 | not significant |
| 7328 | CHR3Q26                                                             | 0.84 | 0.15 | 0 | 0 | 0 | not significant |
| 7329 | FIGUEROA_AML_METHYLATION_CLUSTER_3_DN                               | 0.84 | 0.15 | 0 | 0 | 0 | not significant |
| 7330 | GO_CUL3_RING_UBIQUITIN_LIGASE_COMPLEX                               | 0.84 | 0.15 | 0 | 0 | 0 | not significant |
| 7331 | GO_METALLOEXOPEPTIDASE_ACTIVITY                                     | 0.84 | 0.15 | 0 | 0 | 0 | not significant |
| 7332 | GO_MYOSIN_BINDING                                                   | 0.84 | 0.15 | 0 | 0 | 0 | not significant |
| 7333 | GO_PURINE_NUCLEOSIDE_METABOLIC_PROCESS                              | 0.84 | 0.15 | 0 | 0 | 0 | not significant |
| 7334 | GO_REGULATION_OF_ANTIGEN_RECEPTOR_MEDIATED_SIGNALING_PATHWAY        | 0.84 | 0.15 | 0 | 0 | 0 | not significant |
| 7335 | GO_REGULATION_OF_ASPARTIC_TYPE_PEPTIDASE_ACTIVITY                   | 0.84 | 0.15 | 0 | 0 | 0 | not significant |
| 7336 | GO_REGULATION_OF_VIRAL_INDUCED_CYTOPLASMIC_PATTERN_RECOGNITION_RI   | 0.84 | 0.15 | 0 | 0 | 0 | not significant |
| 7337 | LEE_AGING_CEREBELLUM_DN                                             | 0.84 | 0.15 | 0 | 0 | 0 | not significant |
| 7338 | RASHI_RESPONSE_TO_IONIZING_RADIATION_3                              | 0.84 | 0.15 | 0 | 0 | 0 | not significant |
| 7339 | RIZ_ERYTHROID_DIFFERENTIATION_CNCE1                                 | 0.84 | 0.15 | 0 | 0 | 0 | not significant |
| 7340 | RUAN_RESPONSE_TO_TNF_TROGLITAZONE_DN                                | 0.84 | 0.15 | 0 | 0 | 0 | not significant |
| 7341 | BHAT_ESR1_TARGETS_NOT_VIA_AKT1_DN                                   | 0.84 | 0.14 | 0 | 0 | 0 | not significant |
| 7342 | GO_MOLTING_CYCLE_PROCESS                                            | 0.84 | 0.14 | 0 | 0 | 0 | not significant |
| 7343 | GO_NEGATIVE_REGULATION_OF_SMALL_GTPASE_MEDIATED_SIGNAL_TRANSDUCT    | 0.84 | 0.14 | 0 | 0 | 0 | not significant |
| 7344 | GO_NEUROMUSCULAR_PROCESS_CONTROLLING_BALANCE                        | 0.84 | 0.14 | 0 | 0 | 0 | not significant |
| 7345 | GO_NEURON_PROJECTION_ORGANIZATION                                   | 0.84 | 0.14 | 0 | 0 | 0 | not significant |
| 7346 | REACTOME_DEFECTS_IN_VITAMIN_AND_COFACTOR_METABOLISM                 | 0.84 | 0.14 | 0 | 0 | 0 | not significant |
| 7347 | SONG_TARGETS_OF_IE86_CMV_PROTEIN                                    | 0.84 | 0.14 | 0 | 0 | 0 | not significant |
| 7348 | GO_CELL_ADHESION_MEDIATED_BY_INTEGRIN                               | 0.84 | 0.13 | 0 | 0 | 0 | not significant |
| 7349 | GO_CELL_RECOGNITION                                                 | 0.84 | 0.13 | 0 | 0 | 0 | not significant |
| 7350 | QI_HYPOXIA_TARGETS_OF_HIF1A_AND_FOXA2                               | 0.84 | 0.13 | 0 | 0 | 0 | not significant |
| 7351 | GO_FC_RECEPTOR_MEDIATED_STIMULATORY_SIGNALING_PATHWAY               | 0.84 | 0.12 | 0 | 0 | 0 | not significant |
| 7352 | GO_REGULATION_OF_VIRAL_GENOME_REPLICATION                           | 0.84 | 0.12 | 0 | 0 | 0 | not significant |
| 7353 | ASTON_MAJOR_DEPRESSIVE_DISORDER_DN                                  | 0.84 | 0.11 | 0 | 0 | 0 | not significant |
| 7354 | GO_REGULATION_OF_SYNAPSE_STRUCTURE_OR_ACTIVITY                      | 0.84 | 0.11 | 0 | 0 | 0 | not significant |
| 7355 | GO_GASTRULATION                                                     | 0.84 | 0.1  | 0 | 0 | 0 | not significant |
| 7356 | GO_POSTSYNAPTIC_MEMBRANE                                            | 0.84 | 0.1  | 0 | 0 | 0 | not significant |
| 7357 | GO_CELL_JUNCTION_ORGANIZATION                                       | 0.84 | 0.09 | 0 | 0 | 0 | not significant |
| 7358 | GO_REGULATION_OF_CELLULAR_RESPONSE_TO_GROWTH_FACTOR_STIMULUS        | 0.84 | 0.09 | 0 | 0 | 0 | not significant |
| 7359 | GO_REGULATION_OF_METAL_ION_TRANSPORT                                | 0.84 | 0.09 | 0 | 0 | 0 | not significant |
| 7360 | CHR1P36                                                             | 0.84 | 0.07 | 0 | 0 | 0 | not significant |
| 7361 | GO_VIRAL_LIFE_CYCLE                                                 | 0.84 | 0.07 | 0 | 0 | 0 | not significant |
| 7362 | TBK1_DF_UP                                                          | 0.84 | 0.07 | 0 | 0 | 0 | not significant |
| 7363 | REACTOME_METABOLISM_OF_AMINO_ACIDS_AND_DERIVATIVES                  | 0.84 | 0.06 | 0 | 0 | 0 | not significant |
| 7364 | KIM_BIPOLAR_DISORDER_OLIGODENDROCYTE_DENSITY_CORR_UP                | 0.84 | 0.03 | 0 | 0 | 0 | not significant |
| 7365 | CHR13Q13                                                            | 0.85 | 0.2  | 0 | 0 | 0 | not significant |
| 7366 | REACTOME_KERATAN_SULFATE_DEGRADATION                                | 0.85 | 0.2  | 0 | 0 | 0 | not significant |
| 7367 | GO_NEGATIVE_REGULATION_OF_PROTEIN_FOLDING                           | 0.85 | 0.19 | 0 | 0 | 0 | not significant |
| 7368 | GO_OXIDOREDUCTASE_ACTIVITY_ACTING_ON_A_SULFUR_GROUP_OF_DONORS_D     | 0.85 | 0.19 | 0 | 0 | 0 | not significant |
| 7369 | GO_POST_EMBRYONIC_CAMERA_TYPE_EYE_DEVELOPMENT                       | 0.85 | 0.19 | 0 | 0 | 0 | not significant |
| 7370 | GO_REGULATION_OF_PERK_MEDIATED_UNFOLDED_PROTEIN_RESPONSE            | 0.85 | 0.19 | 0 | 0 | 0 | not significant |
| 7371 | GO_RETINOL_METABOLIC_PROCESS                                        | 0.85 | 0.19 | 0 | 0 | 0 | not significant |
| 7372 | CHR15Q23                                                            | 0.85 | 0.18 | 0 | 0 | 0 | not significant |
| 7373 | CHR16Q12                                                            | 0.85 | 0.18 | 0 | 0 | 0 | not significant |
| 7374 | CHR18Q22                                                            | 0.85 | 0.18 | 0 | 0 | 0 | not significant |
| 7375 | GO_APOPTOTIC_PROCESS_INVOLVED_IN_DEVELOPMENT                        | 0.85 | 0.18 | 0 | 0 | 0 | not significant |
| 7376 | GO_CYCLIN_DEPENDENT_PROTEIN_SERINE_THREONINE_KINASE_INHIBITOR_ACTIV | 0.85 | 0.18 | 0 | 0 | 0 | not significant |
| 7377 | GO_HISTONE_H2A_ACETYLATION                                          | 0.85 | 0.18 | 0 | 0 | 0 | not significant |
| 7378 | GO_NEGATIVE_REGULATION_OF_MICROTUBULE_DEPOLYMERIZATION              | 0.85 | 0.18 | 0 | 0 | 0 | not significant |
| 7379 | GO_POSITIVE_REGULATION_OF_ENDOPLASMIC_RETICULUM_STRESS_INDUCED_IN   | 0.85 | 0.18 | 0 | 0 | 0 | not significant |
| 7380 | GO_PROTEIN_INSERTION_INTO_MITOCHONDRIAL_MEMBRANE_INVOLVED_IN_APOPT  | 0.85 | 0.18 | 0 | 0 | 0 | not significant |
| 7381 | GO_REGULATION_OF_EXTRACELLULAR_MATRIX_ASSEMBLY                      | 0.85 | 0.18 | 0 | 0 | 0 | not significant |
| 7382 | GO_RESPONSE_TO_COBALT_ION                                           | 0.85 | 0.18 | 0 | 0 | 0 | not significant |
| 7383 | GO_SPERM_MIDPIECE                                                   | 0.85 | 0.18 | 0 | 0 | 0 | not significant |
| 7384 | GO_T_CELL_CHEMOTAXIS                                                | 0.85 | 0.18 | 0 | 0 | 0 | not significant |
| 7385 | IVANAGA_E2F1_TARGETS_NOT_INDUCED_BY_SERUM                           | 0.85 | 0.18 | 0 | 0 | 0 | not significant |
| 7386 | JACKSON_DNMT1_TARGETS_DN                                            | 0.85 | 0.18 | 0 | 0 | 0 | not significant |
| 7387 | REACTOME_DISPLACEMENT_OF_DNA_GLYCOSYLASE_BY_APEX1                   | 0.85 | 0.18 | 0 | 0 | 0 | not significant |
| 7388 | BIOCARTA_TOB1_PATHWAY                                               | 0.85 | 0.17 | 0 | 0 | 0 | not significant |
| 7389 | GO_CALCIUM_CHANNEL_REGULATOR_ACTIVITY                               | 0.85 | 0.17 | 0 | 0 | 0 | not significant |
| 7390 | GO_CALCIUM_RELEASE_CHANNEL_ACTIVITY                                 | 0.85 | 0.17 | 0 | 0 | 0 | not significant |
| 7391 | GO_DNA_POLYMERASE_BINDING                                           | 0.85 | 0.17 | 0 | 0 | 0 | not significant |
| 7392 | GO_ENDOPLASMIC_RETICULUM_CHAPERONE_COMPLEX                          | 0.85 | 0.17 | 0 | 0 | 0 | not significant |
| 7393 | GO_HEPARAN_SULFATE_PROTEOGLYCAN_METABOLIC_PROCESS                   | 0.85 | 0.17 | 0 | 0 | 0 | not significant |
| 7394 | GO_K63_LINKED_POLYUBIQUITIN_MODIFICATION_DEPENDENT_PROTEIN_BINDING  | 0.85 | 0.17 | 0 | 0 | 0 | not significant |
| 7395 | GO_MICROTUBULE_SEVERING_ATPASE_ACTIVITY                             | 0.85 | 0.17 | 0 | 0 | 0 | not significant |
| 7396 | GO_MITOCHONDRIAL_DEPOLARIZATION                                     | 0.85 | 0.17 | 0 | 0 | 0 | not significant |
| 7397 | GO_NEGATIVE_REGULATION_OF_GLIAL_CELL_PROLIFERATION                  | 0.85 | 0.17 | 0 | 0 | 0 | not significant |
| 7398 | GO_NEGATIVE_REGULATION_OF_HISTONE_METHYLATION                       | 0.85 | 0.17 | 0 | 0 | 0 | not significant |
| 7399 | GO_NUCLEOTIDE_SUGAR_METABOLIC_PROCESS                               | 0.85 | 0.17 | 0 | 0 | 0 | not significant |
| 7400 | GO_REGULATION_OF_COLLAGEN_BIOSYNTHETIC_PROCESS                      | 0.85 | 0.17 | 0 | 0 | 0 | not significant |



|      |                                                                   |      |      |   |   |   |                 |
|------|-------------------------------------------------------------------|------|------|---|---|---|-----------------|
| 7401 | GO_REGULATION_OF_VIRAL_ENTRY_INT0_HOST_CELL                       | 0.85 | 0.17 | 0 | 0 | 0 | not significant |
| 7402 | GO_U1_SNRNA_BINDING                                               | 0.85 | 0.17 | 0 | 0 | 0 | not significant |
| 7403 | HOLLERN_PAPILLARY_BREAST_TUMOR                                    | 0.85 | 0.17 | 0 | 0 | 0 | not significant |
| 7404 | LIANG_HEMATOPOIESIS_STEM_CELL_NUMBER_SMALL_VS_HUGE_DN             | 0.85 | 0.17 | 0 | 0 | 0 | not significant |
| 7405 | MA_PITUITARY_FETAL_VS_ADULT_UP                                    | 0.85 | 0.17 | 0 | 0 | 0 | not significant |
| 7406 | MANTOVAN_VIRAL_GPCR_SIGNALING_DN                                  | 0.85 | 0.17 | 0 | 0 | 0 | not significant |
| 7407 | GO_ACTIVE_I0N_TRANSMEMBRANE_TRANSPORTER_ACTIVITY                  | 0.85 | 0.16 | 0 | 0 | 0 | not significant |
| 7408 | GO_G_PROTEIN_ALPHA_SUBUNIT_BINDING                                | 0.85 | 0.16 | 0 | 0 | 0 | not significant |
| 7409 | GO_LOW_DENSITY_LIOPROTEIN_RECEPTOR_PARTICLE_METABOLIC_PROCESS     | 0.85 | 0.16 | 0 | 0 | 0 | not significant |
| 7410 | GO_POLYAMINE_BIOSYNTHETIC_PROCESS                                 | 0.85 | 0.16 | 0 | 0 | 0 | not significant |
| 7411 | GO_POSITIVE_REGULATION_OF_GLUCOSE_TRANSMEMBRANE_TRANSPORT         | 0.85 | 0.16 | 0 | 0 | 0 | not significant |
| 7412 | GO_REGULATION_OF_VASCULAR_SMOOTH_MUSCLE_CELL_PROLIFERATION        | 0.85 | 0.16 | 0 | 0 | 0 | not significant |
| 7413 | JIANG_HYPOXIA_VIA_VHL                                             | 0.85 | 0.16 | 0 | 0 | 0 | not significant |
| 7414 | REACTOME_DAP12_INTERACTIONS                                       | 0.85 | 0.16 | 0 | 0 | 0 | not significant |
| 7415 | REACTOME_NCAM_SIGNALING_FOR_NEURITE_OUT_GROWTH                    | 0.85 | 0.16 | 0 | 0 | 0 | not significant |
| 7416 | REACTOME_TRANSPORT_OF_VITAMINS_NUCLEOSIDES_AND_RELATED_MOLECULE   | 0.85 | 0.16 | 0 | 0 | 0 | not significant |
| 7417 | YAMASHITA_LIVER_CANCER_WITH_EPCAM_UP                              | 0.85 | 0.16 | 0 | 0 | 0 | not significant |
| 7418 | CHENG_IMPRINTED_BY ESTRADIOL                                      | 0.85 | 0.15 | 0 | 0 | 0 | not significant |
| 7419 | DELASERNA_MYOD_TARGETS_UP                                         | 0.85 | 0.15 | 0 | 0 | 0 | not significant |
| 7420 | GO_CARDIAC_VENTRICLE_MORPHOGENESIS                                | 0.85 | 0.15 | 0 | 0 | 0 | not significant |
| 7421 | GO_GLAND_MORPHOGENESIS                                            | 0.85 | 0.15 | 0 | 0 | 0 | not significant |
| 7422 | GO_POTASSIUM_CHANNEL_COMPLEX                                      | 0.85 | 0.15 | 0 | 0 | 0 | not significant |
| 7423 | JIANG_TIP30_TARGETS_UP                                            | 0.85 | 0.15 | 0 | 0 | 0 | not significant |
| 7424 | REACTOME_INTERLEUKIN_3_INTERLEUKIN_5_AND_GM-CSF_SIGNALING         | 0.85 | 0.15 | 0 | 0 | 0 | not significant |
| 7425 | CHR4P16                                                           | 0.85 | 0.14 | 0 | 0 | 0 | not significant |
| 7426 | GO_MICROBODY_MEMBRANE                                             | 0.85 | 0.14 | 0 | 0 | 0 | not significant |
| 7427 | GO_REGULATION_OF_PHOSPHATIDYLINOSITOL_3_KINASE_SIGNALING          | 0.85 | 0.14 | 0 | 0 | 0 | not significant |
| 7428 | KEGG_B_CELL_RECEPTOR_SIGNALING_PATHWAY                            | 0.85 | 0.14 | 0 | 0 | 0 | not significant |
| 7429 | PRC2_SUZ12_UP.V1_DN                                               | 0.85 | 0.14 | 0 | 0 | 0 | not significant |
| 7430 | GO_ERYTHROCYTE_HOEMEOSTASIS                                       | 0.85 | 0.13 | 0 | 0 | 0 | not significant |
| 7431 | GO_REGULATION_OF_ESTABLISHMENT_OF_PROTEIN_LOCALIZATION_TO_MITOCHK | 0.85 | 0.13 | 0 | 0 | 0 | not significant |
| 7432 | GO_NOTCH_SIGNALING_PATHWAY                                        | 0.85 | 0.12 | 0 | 0 | 0 | not significant |
| 7433 | GO_ORGANELLE_FUSION                                               | 0.85 | 0.12 | 0 | 0 | 0 | not significant |
| 7434 | GO_PROTEIN_KINASE_B_SIGNALING                                     | 0.85 | 0.11 | 0 | 0 | 0 | not significant |
| 7435 | REACTOME_SELENOAMINO_ACID_METABOLISM                              | 0.85 | 0.11 | 0 | 0 | 0 | not significant |
| 7436 | WAMUNYOKOLI_OVARIAN_CANCER_LMP_UP                                 | 0.85 | 0.11 | 0 | 0 | 0 | not significant |
| 7437 | GO_OUTER_MEMBRANE                                                 | 0.85 | 0.1  | 0 | 0 | 0 | not significant |
| 7438 | BERTUCCI_MEDULLARY_VS_DUCTAL_BREAST_CANCER_UP                     | 0.85 | 0.09 | 0 | 0 | 0 | not significant |
| 7439 | BROWNE_HCMV_INFECTION_4HR_DN                                      | 0.85 | 0.09 | 0 | 0 | 0 | not significant |
| 7440 | IWANAGA_CARCINOGENESIS_BY_KRAS_PTEN_DN                            | 0.85 | 0.09 | 0 | 0 | 0 | not significant |
| 7441 | GO_NEGATIVE_REGULATION_OF_TRANSFERASE_ACTIVITY                    | 0.85 | 0.08 | 0 | 0 | 0 | not significant |
| 7442 | UDAYAKUMAR_MED1_TARGETS_DN                                        | 0.85 | 0.08 | 0 | 0 | 0 | not significant |
| 7443 | BAELDE_DIABETIC_NEPHROPATHY_DN                                    | 0.85 | 0.07 | 0 | 0 | 0 | not significant |
| 7444 | GO_REGULATION_OF_CELL_PROJECTION_ORGANIZATION                     | 0.85 | 0.06 | 0 | 0 | 0 | not significant |
| 7445 | HSIAO_HOUSEKEEPING_GENES                                          | 0.85 | 0.06 | 0 | 0 | 0 | not significant |
| 7446 | BUYTAERT_PHOTODYNAMIC_THERAPY_STRESS_DN                           | 0.85 | 0.04 | 0 | 0 | 0 | not significant |
| 7447 | KIM_ALL_DISORDERS_OLIGODENDROCYTE_NUMBER_CORR_UP                  | 0.85 | 0.04 | 0 | 0 | 0 | not significant |
| 7448 | BONOME_OVARIAN_CANCER_POOR_SURVIVAL_DN                            | 0.86 | 0.2  | 0 | 0 | 0 | not significant |
| 7449 | COLIN_PILOCYTIC_ASTROCYTOMA_VS_GLIOMASTOMA_UP                     | 0.86 | 0.2  | 0 | 0 | 0 | not significant |
| 7450 | GO_POSITIVE_REGULATION_OF_MONOCYTE_CHEMOTAXIS                     | 0.86 | 0.2  | 0 | 0 | 0 | not significant |
| 7451 | GO_REGULATION_OF_LYSOSOMAL_PROTEIN_CATABOLIC_PROCESS              | 0.86 | 0.2  | 0 | 0 | 0 | not significant |
| 7452 | BOYALT_LIVER_CANCER_SUBCLASS_G2                                   | 0.86 | 0.19 | 0 | 0 | 0 | not significant |
| 7453 | CHR1P21                                                           | 0.86 | 0.19 | 0 | 0 | 0 | not significant |
| 7454 | CLIMENT_BREAST_CANCER_COPY_NUMBER_UP                              | 0.86 | 0.19 | 0 | 0 | 0 | not significant |
| 7455 | GHANDH_DIRECT_IRRADIATION_DN                                      | 0.86 | 0.19 | 0 | 0 | 0 | not significant |
| 7456 | GO_CELLULAR_LIPID_BIOSYNTHETIC_PROCESS                            | 0.86 | 0.19 | 0 | 0 | 0 | not significant |
| 7457 | GO_CGMP_MEDIATED_SIGNALING                                        | 0.86 | 0.19 | 0 | 0 | 0 | not significant |
| 7458 | GO_CHLORIDE_CHANNEL_REGULATOR_ACTIVITY                            | 0.86 | 0.19 | 0 | 0 | 0 | not significant |
| 7459 | GO_INWARD_RECTIFIER_POTASSIUM_CHANNEL_ACTIVITY                    | 0.86 | 0.19 | 0 | 0 | 0 | not significant |
| 7460 | GO_NEGATIVE_REGULATION_OF_PROTEIN_LOCALIZATION_TO_MICROTUBULE     | 0.86 | 0.19 | 0 | 0 | 0 | not significant |
| 7461 | GO_PHOSPHODIESTERASE_1_ACTIVITY                                   | 0.86 | 0.19 | 0 | 0 | 0 | not significant |
| 7462 | GO_POTASSIUM_I0N_IMPORT_ACROSS_PLASMA_MEMBRANE                    | 0.86 | 0.19 | 0 | 0 | 0 | not significant |
| 7463 | GO_PROTEIN_PHOSPHATASE_1_BINDING                                  | 0.86 | 0.19 | 0 | 0 | 0 | not significant |
| 7464 | GO_PROTOPORPHYRINOGEN_IX_BIOSYNTHETIC_PROCESS                     | 0.86 | 0.19 | 0 | 0 | 0 | not significant |
| 7465 | GO_TROPHOBLAST_GIANT_CELL_DIFFERENTIATION                         | 0.86 | 0.19 | 0 | 0 | 0 | not significant |
| 7466 | KIM_LIVER_CANCER_POOR_SURVIVAL_DN                                 | 0.86 | 0.19 | 0 | 0 | 0 | not significant |
| 7467 | LUI_THYROID_CANCER_CLUSTER_2                                      | 0.86 | 0.19 | 0 | 0 | 0 | not significant |
| 7468 | PID_IL2_STAT5_PATHWAY                                             | 0.86 | 0.19 | 0 | 0 | 0 | not significant |
| 7469 | WATANABE_COLON_CANCER_MSI_VS_MSS_DN                               | 0.86 | 0.19 | 0 | 0 | 0 | not significant |
| 7470 | ZIRN_TRETINOIN_RESPONSE_WT1_DN                                    | 0.86 | 0.19 | 0 | 0 | 0 | not significant |
| 7471 | BYSTROEM_CORRELATED_WITH_IL5_UP                                   | 0.86 | 0.18 | 0 | 0 | 0 | not significant |
| 7472 | CHEN_ETV5_TARGETS_TESTIS                                          | 0.86 | 0.18 | 0 | 0 | 0 | not significant |
| 7473 | CROONQUIST_NRAS_SIGNALING_UP                                      | 0.86 | 0.18 | 0 | 0 | 0 | not significant |
| 7474 | EINAV_INTERFERON_SIGNATURE_IN_CANCER                              | 0.86 | 0.18 | 0 | 0 | 0 | not significant |
| 7475 | ENGELMANN_CANCER_PROGENITORS_UP                                   | 0.86 | 0.18 | 0 | 0 | 0 | not significant |
| 7476 | GO_ACTIVATION_OF_JANUS_KINASE_ACTIVITY                            | 0.86 | 0.18 | 0 | 0 | 0 | not significant |
| 7477 | GO_CERAMIDE_METABOLIC_PROCESS                                     | 0.86 | 0.18 | 0 | 0 | 0 | not significant |
| 7478 | GO_INSULIN_LIKE_GROWTH_FACTOR_RECEPTOR_SIGNALING_PATHWAY          | 0.86 | 0.18 | 0 | 0 | 0 | not significant |
| 7479 | GO_L GLUTAMATE_TRANSMEMBRANE_TRANSPORT                            | 0.86 | 0.18 | 0 | 0 | 0 | not significant |
| 7480 | GO_NEGATIVE_REGULATION_OF_BIOMINERAL_TISSUE_DEVELOPMENT           | 0.86 | 0.18 | 0 | 0 | 0 | not significant |
| 7481 | GO_NEGATIVE_REGULATION_OF_PLASMA_MEMBRANE_BOUNDED_CELL_PROJECTI   | 0.86 | 0.18 | 0 | 0 | 0 | not significant |
| 7482 | GO_PEPTIDYL_TYROSINE_AUTOPOHOSPHORYLATION                         | 0.86 | 0.18 | 0 | 0 | 0 | not significant |
| 7483 | GO_POSITIVE_REGULATION_OF_HUMORAL_IMMUNE_RESPONSE                 | 0.86 | 0.18 | 0 | 0 | 0 | not significant |
| 7484 | GO_REGULATION_OF_B_CELL_APOPTOTIC_PROCESS                         | 0.86 | 0.18 | 0 | 0 | 0 | not significant |
| 7485 | GO_REGULATION_OF_POSTSYNAPTIC_SPECIALIZATION_ASSEMBLY             | 0.86 | 0.18 | 0 | 0 | 0 | not significant |
| 7486 | GO_RESPONSE_TO_MISFOLDED_PROTEIN                                  | 0.86 | 0.18 | 0 | 0 | 0 | not significant |
| 7487 | GO_TELOMERIC_LOOP_DISASSEMBLY                                     | 0.86 | 0.18 | 0 | 0 | 0 | not significant |
| 7488 | GO_TRANSFERRIN_TRANSPORT                                          | 0.86 | 0.18 | 0 | 0 | 0 | not significant |
| 7489 | KYNG_DNA_DAMAGE_BY_GAMMA_RADIATION                                | 0.86 | 0.18 | 0 | 0 | 0 | not significant |
| 7490 | PID_REELIN_PATHWAY                                                | 0.86 | 0.18 | 0 | 0 | 0 | not significant |
| 7491 | GARGALOVIC_RESPONSE_TO_OXIDIZED_PHOSPHOLIPIDS_LIGHTYELLOW_UP      | 0.86 | 0.17 | 0 | 0 | 0 | not significant |
| 7492 | GO_3_PHOSPHOADENOSINE_5_PHOSPHOSULFATE_BIOSYNTHETIC_PROCESS       | 0.86 | 0.17 | 0 | 0 | 0 | not significant |
| 7493 | GO_ADIPONECTIN_ACTIVATED_SIGNALING_PATHWAY                        | 0.86 | 0.17 | 0 | 0 | 0 | not significant |
| 7494 | GO_AGGRESOME                                                      | 0.86 | 0.17 | 0 | 0 | 0 | not significant |
| 7495 | GO_MUCUS_SECRETION                                                | 0.86 | 0.17 | 0 | 0 | 0 | not significant |
| 7496 | GO_REGULATION_OF_CAMP_MEDIATED_SIGNALING                          | 0.86 | 0.17 | 0 | 0 | 0 | not significant |
| 7497 | GO_REGULATION_OF_PROTEIN_TARGETING_TO_MITOCHONDRION               | 0.86 | 0.17 | 0 | 0 | 0 | not significant |
| 7498 | ROESSLER_LIVER_CANCER_METASTASIS_DN                               | 0.86 | 0.17 | 0 | 0 | 0 | not significant |
| 7499 | GO_AMINE_TRANSPORT                                                | 0.86 | 0.16 | 0 | 0 | 0 | not significant |
| 7500 | GO_CELLULAR_RESPONSE_TO_GLUCOSE_STARVATION                        | 0.86 | 0.16 | 0 | 0 | 0 | not significant |
| 7501 | GO_ENDOSOME_TO_LYSOSOME_TRANSPORT                                 | 0.86 | 0.16 | 0 | 0 | 0 | not significant |
| 7502 | GO_REGULATION_OF_LEUKOCYTE_DEGRANULATION                          | 0.86 | 0.16 | 0 | 0 | 0 | not significant |
| 7503 | GO_REGULATION_OF_PROTEIN_ACETYLATION                              | 0.86 | 0.16 | 0 | 0 | 0 | not significant |
| 7504 | GO_SENSORY_PERCEPTION_OF_LIGHT_STIMULUS                           | 0.86 | 0.16 | 0 | 0 | 0 | not significant |
| 7505 | GO_SIGNALING_ADAPTOR_ACTIVITY                                     | 0.86 | 0.16 | 0 | 0 | 0 | not significant |
| 7506 | GO_VOLTAGE_GATED_CATION_CHANNEL_ACTIVITY                          | 0.86 | 0.16 | 0 | 0 | 0 | not significant |
| 7507 | LIN_SILENCED_BY_TUMOR_MICROENVIRONMENT                            | 0.86 | 0.16 | 0 | 0 | 0 | not significant |
| 7508 | CHR4Q31                                                           | 0.86 | 0.15 | 0 | 0 | 0 | not significant |
| 7509 | GO_ORGANELLE_DISASSEMBLY                                          | 0.86 | 0.15 | 0 | 0 | 0 | not significant |

|      |                                                                    |      |      |   |   |   |                 |
|------|--------------------------------------------------------------------|------|------|---|---|---|-----------------|
| 7510 | GO_PROTEIN_LOCALIZATION_TO_SYNAPSE                                 | 0.86 | 0.15 | 0 | 0 | 0 | not significant |
| 7511 | FIGUEROA_AML_METHYLATION_CLUSTER_4_UP                              | 0.86 | 0.14 | 0 | 0 | 0 | not significant |
| 7512 | GO_EXTRINSIC_COMPONENT_OF_PLASMA_MEMBRANE                          | 0.86 | 0.14 | 0 | 0 | 0 | not significant |
| 7513 | GO_PURINE_CONTAINING_COMPOUND_METABOLIC_PROCESS                    | 0.86 | 0.14 | 0 | 0 | 0 | not significant |
| 7514 | GO_REGULATION_OF_INTRINSIC_APOPTOTIC_SIGNALING_PATHWAY             | 0.86 | 0.13 | 0 | 0 | 0 | not significant |
| 7515 | KIM_ALL_DISORDERS_DURATION_CORR_DN                                 | 0.86 | 0.13 | 0 | 0 | 0 | not significant |
| 7516 | STEARMAN_LUNG_CANCER_EARLY_VS_LATE_UP                              | 0.86 | 0.13 | 0 | 0 | 0 | not significant |
| 7517 | GO_NEGATIVE_REGULATION_OF_KINASE_ACTIVITY                          | 0.86 | 0.12 | 0 | 0 | 0 | not significant |
| 7518 | GO_REGULATION_OF_CHROMATIN_ORGANIZATION                            | 0.86 | 0.12 | 0 | 0 | 0 | not significant |
| 7519 | GO_SEX_DIFFERENTIATION                                             | 0.86 | 0.12 | 0 | 0 | 0 | not significant |
| 7520 | DAVICONI_MOLECULAR_ARMS_VS_ERMS_UP                                 | 0.86 | 0.11 | 0 | 0 | 0 | not significant |
| 7521 | GO_NEURON_TO_NEURON_SYNAPSE                                        | 0.86 | 0.11 | 0 | 0 | 0 | not significant |
| 7522 | GO_POSITIVE_REGULATION_OF_PROTEIN_SERINE_THREONINE_KINASE_ACTIVITY | 0.86 | 0.11 | 0 | 0 | 0 | not significant |
| 7523 | GO_TRANSFERASE_ACTIVITY_TRANSFERRING_ACYL_GROUPS                   | 0.86 | 0.11 | 0 | 0 | 0 | not significant |
| 7524 | LOCKWOOD_AMPLIFIED_IN_LUNG_CANCER                                  | 0.86 | 0.11 | 0 | 0 | 0 | not significant |
| 7525 | GO_POSITIVE_REGULATION_OF_GTPASE_ACTIVITY                          | 0.86 | 0.1  | 0 | 0 | 0 | not significant |
| 7526 | GRUETZMANN_PANCREATIC_CANCER_UP                                    | 0.86 | 0.1  | 0 | 0 | 0 | not significant |
| 7527 | NIKOLSKY_BREAST_CANCER_17Q21_Q25_AMPLICON                          | 0.86 | 0.1  | 0 | 0 | 0 | not significant |
| 7528 | GO_ENDOMEMBRANE_SYSTEM_ORGANIZATION                                | 0.86 | 0.09 | 0 | 0 | 0 | not significant |
| 7529 | RAO_BOUND_BY_SALL4_ISOFORM_B                                       | 0.86 | 0.09 | 0 | 0 | 0 | not significant |
| 7530 | GO_NEGATIVE_REGULATION_OF_PROTEIN_MODIFICATION_PROCESS             | 0.86 | 0.08 | 0 | 0 | 0 | not significant |
| 7531 | GO_NUCLEOBASE_CONTAINING_SMALL_MOLECULE_METABOLIC_PROCESS          | 0.86 | 0.08 | 0 | 0 | 0 | not significant |
| 7532 | REACTOME_DNA_REPAIR                                                | 0.86 | 0.08 | 0 | 0 | 0 | not significant |
| 7533 | GO_SYNAPSE_PART                                                    | 0.86 | 0.07 | 0 | 0 | 0 | not significant |
| 7534 | GO_DNA_REPAIR                                                      | 0.86 | 0.06 | 0 | 0 | 0 | not significant |
| 7535 | GO_CELL_PROJECTION_PART                                            | 0.86 | 0.04 | 0 | 0 | 0 | not significant |
| 7536 | GO_CONNECTIVE_TISSUE_REPLACEMENT                                   | 0.87 | 0.21 | 0 | 0 | 0 | not significant |
| 7537 | GO_G_QUADRUPLEX_DNA_UNWINDING                                      | 0.87 | 0.21 | 0 | 0 | 0 | not significant |
| 7538 | GO_REGULATION_OF_LIGASE_ACTIVITY                                   | 0.87 | 0.21 | 0 | 0 | 0 | not significant |
| 7539 | KUROKAWA_LIVER_CANCER_CHEMOTHERAPY_UP                              | 0.87 | 0.21 | 0 | 0 | 0 | not significant |
| 7540 | GO_AMINE_BIOSYNTHETIC_PROCESS                                      | 0.87 | 0.2  | 0 | 0 | 0 | not significant |
| 7541 | GO_BLEB_ASSEMBLY                                                   | 0.87 | 0.2  | 0 | 0 | 0 | not significant |
| 7542 | GO_NAD_BIOSYNTHETIC_PROCESS                                        | 0.87 | 0.2  | 0 | 0 | 0 | not significant |
| 7543 | GO_POSITIVE_REGULATION_OF_MESONEPHROS_DEVELOPMENT                  | 0.87 | 0.2  | 0 | 0 | 0 | not significant |
| 7544 | GO_POSITIVE_REGULATION_OF_SIGNAL_TRANSDUCTION_BY_P53_CLASS_MEDIAT  | 0.87 | 0.2  | 0 | 0 | 0 | not significant |
| 7545 | GO_PYRIMIDINE_CONTAINING_COMPOUND_SALVAGE                          | 0.87 | 0.2  | 0 | 0 | 0 | not significant |
| 7546 | GO_REGULATION_OF_POSTSYNAPTIC_NEUROTRANSMITTER_RECEPTOR_ACTIVITY   | 0.87 | 0.2  | 0 | 0 | 0 | not significant |
| 7547 | GO_TRANS_GOLGI_NETWORK_TRANSPORT_VESICLE_MEMBRANE                  | 0.87 | 0.2  | 0 | 0 | 0 | not significant |
| 7548 | REACTOME_ACYL_CHAIN_REMODELING_OF_PG                               | 0.87 | 0.2  | 0 | 0 | 0 | not significant |
| 7549 | REACTOME_APEX1_INDEPENDENT_RESOLUTION_OF_AP_SITES_VIA_THE_SINGLE_I | 0.87 | 0.2  | 0 | 0 | 0 | not significant |
| 7550 | RIZ_ERYTHROID_DIFFERENTIATION_HEMGN                                | 0.87 | 0.2  | 0 | 0 | 0 | not significant |
| 7551 | SHARMA_PILOCYTTIC_ASTROCYTOMA_LOCATION_UP                          | 0.87 | 0.2  | 0 | 0 | 0 | not significant |
| 7552 | TOMLINS_METASTASIS_UP                                              | 0.87 | 0.2  | 0 | 0 | 0 | not significant |
| 7553 | WANG_BARRETTES_ESOPHAGUS_AND_ESOPHAGUS_CANCER_DN                   | 0.87 | 0.2  | 0 | 0 | 0 | not significant |
| 7554 | CLAUS_PGR_POSITIVE_MENINGIOMA_DN                                   | 0.87 | 0.19 | 0 | 0 | 0 | not significant |
| 7555 | GO_BRCA1_A_COMPLEX                                                 | 0.87 | 0.19 | 0 | 0 | 0 | not significant |
| 7556 | GO_CYTOPLASMIC_SIDE_OF_ROUGH_ENDOPLASMIC_RETICULUM_MEMBRANE        | 0.87 | 0.19 | 0 | 0 | 0 | not significant |
| 7557 | GO_LAGGING_STRAND_ELONGATION                                       | 0.87 | 0.19 | 0 | 0 | 0 | not significant |
| 7558 | GO_PHARYNGEAL_SYSTEM_DEVELOPMENT                                   | 0.87 | 0.19 | 0 | 0 | 0 | not significant |
| 7559 | GO_PIGMENT_GRANULE_LOCALIZATION                                    | 0.87 | 0.19 | 0 | 0 | 0 | not significant |
| 7560 | GO_POSITIVE_REGULATION_OF_T_HELPER_1_TYPE_IMMUNE_RESPONSE          | 0.87 | 0.19 | 0 | 0 | 0 | not significant |
| 7561 | GO_PURINE_CONTAINING_COMPOUND_CATABOLIC_PROCESS                    | 0.87 | 0.19 | 0 | 0 | 0 | not significant |
| 7562 | GO_REGULATION_OF_BONE_REMODELING                                   | 0.87 | 0.19 | 0 | 0 | 0 | not significant |
| 7563 | GO_REGULATION_OF_PROTEIN_POLYUBIQUITINATION                        | 0.87 | 0.19 | 0 | 0 | 0 | not significant |
| 7564 | GO_TOR_COMPLEX                                                     | 0.87 | 0.19 | 0 | 0 | 0 | not significant |
| 7565 | KEGG_PORPHYRIN_AND_CHLOROPHYLL_METABOLISM                          | 0.87 | 0.19 | 0 | 0 | 0 | not significant |
| 7566 | LIANG_HEMATOPOIESIS_STEM_CELL_NUMBER_LARGE_VS_TINY_DN              | 0.87 | 0.19 | 0 | 0 | 0 | not significant |
| 7567 | PAL_PRMT5_TARGETS_DN                                               | 0.87 | 0.19 | 0 | 0 | 0 | not significant |
| 7568 | RAMJANI_APOPTOSIS_BY_TGFB1_VIA_SMAD4_DN                            | 0.87 | 0.19 | 0 | 0 | 0 | not significant |
| 7569 | REACTOME_APOPTOTIC_CLEAVAGE_OF_CELLULAR_PROTEINS                   | 0.87 | 0.19 | 0 | 0 | 0 | not significant |
| 7570 | ZHAN_MULTIPLE_MYELOMA_MS_DN                                        | 0.87 | 0.19 | 0 | 0 | 0 | not significant |
| 7571 | ZHOU_TNF_SIGNALING_4HR                                             | 0.87 | 0.19 | 0 | 0 | 0 | not significant |
| 7572 | GILDEA_METASTASIS                                                  | 0.87 | 0.18 | 0 | 0 | 0 | not significant |
| 7573 | GO_DRUG_CATABOLIC_PROCESS                                          | 0.87 | 0.18 | 0 | 0 | 0 | not significant |
| 7574 | GO_ENDOCYTTIC_RECYCLING                                            | 0.87 | 0.18 | 0 | 0 | 0 | not significant |
| 7575 | GO_HEPARAN_SULFATE_SULFOTRANSFERASE_ACTIVITY                       | 0.87 | 0.18 | 0 | 0 | 0 | not significant |
| 7576 | GO_NEGATIVE_REGULATION_OF_UBIQUITIN_PROTEIN_TRANSFERASE_ACTIVITY   | 0.87 | 0.18 | 0 | 0 | 0 | not significant |
| 7577 | GO_RESPONSE_TO_OXYGEN_RADICAL                                      | 0.87 | 0.18 | 0 | 0 | 0 | not significant |
| 7578 | GO_SYNAPTIC_TRANSMISSION_DOPAMINERGIC                              | 0.87 | 0.18 | 0 | 0 | 0 | not significant |
| 7579 | GO_X_CHROMOSOME                                                    | 0.87 | 0.18 | 0 | 0 | 0 | not significant |
| 7580 | KEGG_AMYOTROPHIC_LATERAL_SCLEROSIS_ALS                             | 0.87 | 0.18 | 0 | 0 | 0 | not significant |
| 7581 | KYNG_DNA_DAMAGE_BY_GAMMA_AND_UV_RADIATION                          | 0.87 | 0.18 | 0 | 0 | 0 | not significant |
| 7582 | LIANG_HEMATOPOIESIS_STEM_CELL_NUMBER_QTL                           | 0.87 | 0.18 | 0 | 0 | 0 | not significant |
| 7583 | PID_AR_TF_PATHWAY                                                  | 0.87 | 0.18 | 0 | 0 | 0 | not significant |
| 7584 | REACTOME_TRANSPORT_AND_SYNTHESIS_OF_PAPS                           | 0.87 | 0.18 | 0 | 0 | 0 | not significant |
| 7585 | GO_NEGATIVE_REGULATION_OF_METALLOPEPTIDASE_ACTIVITY                | 0.87 | 0.17 | 0 | 0 | 0 | not significant |
| 7586 | GO_REGULATION_OF_VESICLE_FUSION                                    | 0.87 | 0.17 | 0 | 0 | 0 | not significant |
| 7587 | HUMMERICH_SKIN_CANCER_PROGRESSION_DN                               | 0.87 | 0.17 | 0 | 0 | 0 | not significant |
| 7588 | ROSS_AML_OF_FAB_M7_TYPE                                            | 0.87 | 0.17 | 0 | 0 | 0 | not significant |
| 7589 | VECCHI_GASTRIC_CANCER_ADVANCED_VS_EARLY_UP                         | 0.87 | 0.17 | 0 | 0 | 0 | not significant |
| 7590 | WU_CELL_MIGRATION                                                  | 0.87 | 0.17 | 0 | 0 | 0 | not significant |
| 7591 | CHR15Q15                                                           | 0.87 | 0.16 | 0 | 0 | 0 | not significant |
| 7592 | GO_ENDONUCLEASE_ACTIVITY                                           | 0.87 | 0.16 | 0 | 0 | 0 | not significant |
| 7593 | GO_FILOPODIUM                                                      | 0.87 | 0.16 | 0 | 0 | 0 | not significant |
| 7594 | GO_REGULATION_OF_MUSCLE_ORGAN_DEVELOPMENT                          | 0.87 | 0.16 | 0 | 0 | 0 | not significant |
| 7595 | PID_CD8_TCR_PATHWAY                                                | 0.87 | 0.16 | 0 | 0 | 0 | not significant |
| 7596 | REACTOME_BIOLOGICAL_OXIDATIONS                                     | 0.87 | 0.16 | 0 | 0 | 0 | not significant |
| 7597 | BENPORATH_ES_CORE_NINE_CORRELATED                                  | 0.87 | 0.15 | 0 | 0 | 0 | not significant |
| 7598 | GO_NEGATIVE_REGULATION_OF_DNA_BINDING_TRANSCRIPTION_FACTOR_ACTIVIT | 0.87 | 0.15 | 0 | 0 | 0 | not significant |
| 7599 | GO_REGULATION_OF_REGULATED_SECRETORY_PATHWAY                       | 0.87 | 0.15 | 0 | 0 | 0 | not significant |
| 7600 | CHR21Q22                                                           | 0.87 | 0.14 | 0 | 0 | 0 | not significant |
| 7601 | GO_CALCIIUM_MEDIATED_SIGNALING                                     | 0.87 | 0.14 | 0 | 0 | 0 | not significant |
| 7602 | GO_CYTOPLASMIC_SIDE_OF_MEMBRANE                                    | 0.87 | 0.14 | 0 | 0 | 0 | not significant |
| 7603 | GO_NEURAL_TUBE_DEVELOPMENT                                         | 0.87 | 0.14 | 0 | 0 | 0 | not significant |
| 7604 | GO_POSITIVE_REGULATION_OF_INTRACELLULAR_PROTEIN_TRANSPORT          | 0.87 | 0.14 | 0 | 0 | 0 | not significant |
| 7605 | GO_REGULATION_OF_HISTONE_MODIFICATION                              | 0.87 | 0.14 | 0 | 0 | 0 | not significant |
| 7606 | BROWNE_HCMV_INFECTION_48HR_UP                                      | 0.87 | 0.13 | 0 | 0 | 0 | not significant |
| 7607 | GO_PLATELET_ACTIVATION                                             | 0.87 | 0.13 | 0 | 0 | 0 | not significant |
| 7608 | GO_REGULATION_OF_MYELOID_CELL_DIFFERENTIATION                      | 0.87 | 0.13 | 0 | 0 | 0 | not significant |
| 7609 | GO_ACTIN_BINDING                                                   | 0.87 | 0.12 | 0 | 0 | 0 | not significant |
| 7610 | GO_REGULATION_OF_DEVELOPMENTAL_GROWTH                              | 0.87 | 0.12 | 0 | 0 | 0 | not significant |
| 7611 | GO_GTPASE_REGULATOR_ACTIVITY                                       | 0.87 | 0.11 | 0 | 0 | 0 | not significant |
| 7612 | GO_SENSORY_ORGAN_DEVELOPMENT                                       | 0.87 | 0.11 | 0 | 0 | 0 | not significant |
| 7613 | GO_ESTABLISHMENT_OF_PROTEIN_LOCALIZATION_TO_MEMBRANE               | 0.87 | 0.1  | 0 | 0 | 0 | not significant |
| 7614 | GO_REGULATION_OF_HEMOPOIESIS                                       | 0.87 | 0.09 | 0 | 0 | 0 | not significant |
| 7615 | GO_CHROMATIN_BINDING                                               | 0.87 | 0.08 | 0 | 0 | 0 | not significant |
| 7616 | BENPORATH_SOX2_TARGETS                                             | 0.87 | 0.07 | 0 | 0 | 0 | not significant |
| 7617 | GO_SUPRAMOLECULAR_FIBER_ORGANIZATION                               | 0.87 | 0.07 | 0 | 0 | 0 | not significant |
| 7618 | GO_POSITIVE_REGULATION_OF_CALCIIUM_ION_DEPENDENT_EXOCYTOSIS        | 0.88 | 0.22 | 0 | 0 | 0 | not significant |

|      |                                                                      |      |      |   |   |   |                 |
|------|----------------------------------------------------------------------|------|------|---|---|---|-----------------|
| 7619 | GO_REGULATION_OF_NECROTIC_CELL_DEATH                                 | 0.88 | 0.22 | 0 | 0 | 0 | not significant |
| 7620 | BIOCARTA_PLK3_PATHWAY                                                | 0.88 | 0.21 | 0 | 0 | 0 | not significant |
| 7621 | CHIANG_LIVER_CANCER_SUBCLASS_POLYSOMY7_DN                            | 0.88 | 0.21 | 0 | 0 | 0 | not significant |
| 7622 | GO_3_5_DNA_HELICASE_ACTIVITY                                         | 0.88 | 0.21 | 0 | 0 | 0 | not significant |
| 7623 | GO_GLYOXYLATE_METABOLIC_PROCESS                                      | 0.88 | 0.21 | 0 | 0 | 0 | not significant |
| 7624 | GO_NEGATIVE_REGULATION_OF_MITOCHONDRIAL_OUTER_MEMBRANE_PERMEABI      | 0.88 | 0.21 | 0 | 0 | 0 | not significant |
| 7625 | GO_POSITIVE_REGULATION_OF_RECEPTOR_RECYCLING                         | 0.88 | 0.21 | 0 | 0 | 0 | not significant |
| 7626 | GO_PURINE_NUCLEOTIDE_TRANSMEMBRANE_TRANSPORTER_ACTIVITY              | 0.88 | 0.21 | 0 | 0 | 0 | not significant |
| 7627 | GO_REGULATION_OF_LYMPHOCYTE_APOPTOTIC_PROCESS                        | 0.88 | 0.21 | 0 | 0 | 0 | not significant |
| 7628 | GO_REGULATION_OF_MESONEPHROS_DEVELOPMENT                             | 0.88 | 0.21 | 0 | 0 | 0 | not significant |
| 7629 | GO_REGULATION_OF_SODIUM_ION_TRANSMEMBRANE_TRANSPORTER_ACTIVITY       | 0.88 | 0.21 | 0 | 0 | 0 | not significant |
| 7630 | GO_TRNA_CATABOLIC_PROCESS                                            | 0.88 | 0.21 | 0 | 0 | 0 | not significant |
| 7631 | GO_ZYMOGEN_GRANULE                                                   | 0.88 | 0.21 | 0 | 0 | 0 | not significant |
| 7632 | PID_HEDGEHOG_2PATHWAY                                                | 0.88 | 0.21 | 0 | 0 | 0 | not significant |
| 7633 | REACTOME_CASPASE_ACTIVATION_VIA_EXTRINSIC_APOPTOTIC_SIGNALLING_PATH  | 0.88 | 0.21 | 0 | 0 | 0 | not significant |
| 7634 | ROYLANCE_BREAST_CANCER_16Q_COPY_NUMBER_DN                            | 0.88 | 0.21 | 0 | 0 | 0 | not significant |
| 7635 | SA_FAS_SIGNALING                                                     | 0.88 | 0.21 | 0 | 0 | 0 | not significant |
| 7636 | YOSHIOKA_LIVER_CANCER_EARLY_RECURRENCE_DN                            | 0.88 | 0.21 | 0 | 0 | 0 | not significant |
| 7637 | CHOW_RASSF1_TARGETS_UP                                               | 0.88 | 0.2  | 0 | 0 | 0 | not significant |
| 7638 | GENTILE_UV_RESPONSE_CLUSTER_D7                                       | 0.88 | 0.2  | 0 | 0 | 0 | not significant |
| 7639 | GO_DNA_DOUBLE_STRAND_BREAK_PROCESSING                                | 0.88 | 0.2  | 0 | 0 | 0 | not significant |
| 7640 | GO_ENDOCARDIAL_CUSHION_DEVELOPMENT                                   | 0.88 | 0.2  | 0 | 0 | 0 | not significant |
| 7641 | GO_ENDOSOME_TO_PLASMA_MEMBRANE_PROTEIN_TRANSPORT                     | 0.88 | 0.2  | 0 | 0 | 0 | not significant |
| 7642 | GO_INOSITOL_PHOSPHATE_BIOSYNTHETIC_PROCESS                           | 0.88 | 0.2  | 0 | 0 | 0 | not significant |
| 7643 | GO_NEGATIVE_REGULATION_OF_EPITHELIAL_CELL_MIGRATION                  | 0.88 | 0.2  | 0 | 0 | 0 | not significant |
| 7644 | GO_POSITIVE_REGULATION_OF_MONONUCLEAR_CELL_MIGRATION                 | 0.88 | 0.2  | 0 | 0 | 0 | not significant |
| 7645 | GO_REGULATION_OF_ACTIVIN_RECEPTOR_SIGNALING_PATHWAY                  | 0.88 | 0.2  | 0 | 0 | 0 | not significant |
| 7646 | GO_REGULATION_OF_METALLOPEPTIDASE_ACTIVITY                           | 0.88 | 0.2  | 0 | 0 | 0 | not significant |
| 7647 | GO_REGULATION_OF_VASCULAR_SMOOTH_MUSCLE_CELL_DIFFERENTIATION         | 0.88 | 0.2  | 0 | 0 | 0 | not significant |
| 7648 | GO_RESPONSE_TO_POTASSIUM_ION                                         | 0.88 | 0.2  | 0 | 0 | 0 | not significant |
| 7649 | GO_VASCULAR_ENDOTHELIAL_GROWTH_FACTOR_RECEPTOR_BINDING               | 0.88 | 0.2  | 0 | 0 | 0 | not significant |
| 7650 | REACTOME_TRANSCRIPTIONAL_REGULATION_OF_PLURIPOTENT_STEM_CELLS        | 0.88 | 0.2  | 0 | 0 | 0 | not significant |
| 7651 | TONKS_TARGETS_OF_RUNX1_RUNX1T1_FUSION_ERYTHROCYTE_DN                 | 0.88 | 0.2  | 0 | 0 | 0 | not significant |
| 7652 | GO_ATP_HYDROLYSIS_COUPLED_CATION_TRANSMEMBRANE_TRANSPORT             | 0.88 | 0.19 | 0 | 0 | 0 | not significant |
| 7653 | GO_BONE_MINERALIZATION                                               | 0.88 | 0.19 | 0 | 0 | 0 | not significant |
| 7654 | GO_CYSTEINE_TYPE_ENDOPEPTIDASE_INHIBITOR_ACTIVITY_INVOLVED_IN_APOPTC | 0.88 | 0.19 | 0 | 0 | 0 | not significant |
| 7655 | GO_CYTOSOLIC_LARGE_RIBOSOMAL_SUBUNIT                                 | 0.88 | 0.19 | 0 | 0 | 0 | not significant |
| 7656 | GO_DNA_RECOMBINASE_MEDIATOR_COMPLEX                                  | 0.88 | 0.19 | 0 | 0 | 0 | not significant |
| 7657 | GO_FATTY_ACID_TRANSPORT                                              | 0.88 | 0.19 | 0 | 0 | 0 | not significant |
| 7658 | GO_MULTIVESICULAR_BODY_ORGANIZATION                                  | 0.88 | 0.19 | 0 | 0 | 0 | not significant |
| 7659 | GO_PROTEIN_SELF_ASSOCIATION                                          | 0.88 | 0.19 | 0 | 0 | 0 | not significant |
| 7660 | GO_VASCULAR_SMOOTH_MUSCLE_CELL_DIFFERENTIATION                       | 0.88 | 0.19 | 0 | 0 | 0 | not significant |
| 7661 | HERNANDEZ_MITOTIC_ARREST_BY_DOCETAXEL_1_DN                           | 0.88 | 0.19 | 0 | 0 | 0 | not significant |
| 7662 | HOWLIN_CITED1_TARGETS_1_UP                                           | 0.88 | 0.19 | 0 | 0 | 0 | not significant |
| 7663 | LABBE_TARGETS_OF_TGFB1_AND_WNT3A_DN                                  | 0.88 | 0.19 | 0 | 0 | 0 | not significant |
| 7664 | LANDIS_ERBB2_BREAST_TUMORS_65_DN                                     | 0.88 | 0.19 | 0 | 0 | 0 | not significant |
| 7665 | REACTOME_DISEASES_OF_CARBOHYDRATE_METABOLISM                         | 0.88 | 0.19 | 0 | 0 | 0 | not significant |
| 7666 | REACTOME_PREGNENOLONE_BIOSYNTHESIS                                   | 0.88 | 0.19 | 0 | 0 | 0 | not significant |
| 7667 | ATM_DN.V1_DN                                                         | 0.88 | 0.18 | 0 | 0 | 0 | not significant |
| 7668 | BURTON_ADIPOGENESIS_8                                                | 0.88 | 0.18 | 0 | 0 | 0 | not significant |
| 7669 | CHR15Q24                                                             | 0.88 | 0.18 | 0 | 0 | 0 | not significant |
| 7670 | GO_CALCIIUM_ION_TRANSMEMBRANE_TRANSPORTER_ACTIVITY                   | 0.88 | 0.18 | 0 | 0 | 0 | not significant |
| 7671 | GO_FEMALE_SEX_DIFFERENTIATION                                        | 0.88 | 0.18 | 0 | 0 | 0 | not significant |
| 7672 | GO_NEGATIVE_REGULATION_OF_RESPONSE_TO_BIOTIC_STIMULUS                | 0.88 | 0.18 | 0 | 0 | 0 | not significant |
| 7673 | GO_PROTEIN_TYROSINE_KINASE_ACTIVITY                                  | 0.88 | 0.18 | 0 | 0 | 0 | not significant |
| 7674 | GO_REGULATION_OF_OXIDATIVE_STRESS_INDUCED_CELL_DEATH                 | 0.88 | 0.18 | 0 | 0 | 0 | not significant |
| 7675 | KEGG_COLORECTAL_CANCER                                               | 0.88 | 0.18 | 0 | 0 | 0 | not significant |
| 7676 | PID_ANGIOPLETIN_RECEPTOR_PATHWAY                                     | 0.88 | 0.18 | 0 | 0 | 0 | not significant |
| 7677 | PID_HDAC_CLASSI_PATHWAY                                              | 0.88 | 0.18 | 0 | 0 | 0 | not significant |
| 7678 | VANDESLUIS_COMM1_TARGETS_GROUP_3_UP                                  | 0.88 | 0.18 | 0 | 0 | 0 | not significant |
| 7679 | CHUNG_BLISTER_CYTOTOXICITY_UP                                        | 0.88 | 0.17 | 0 | 0 | 0 | not significant |
| 7680 | FONTAINE_PAPILLARY_THYROID_CARCINOMA_DN                              | 0.88 | 0.17 | 0 | 0 | 0 | not significant |
| 7681 | GO_ADAPTIVE_THERMOGENESIS                                            | 0.88 | 0.17 | 0 | 0 | 0 | not significant |
| 7682 | GO_DEMETHYLATION                                                     | 0.88 | 0.17 | 0 | 0 | 0 | not significant |
| 7683 | GO_DIOXYGENASE_ACTIVITY                                              | 0.88 | 0.17 | 0 | 0 | 0 | not significant |
| 7684 | GO_HISTONE_H3_K4_METHYLATION                                         | 0.88 | 0.17 | 0 | 0 | 0 | not significant |
| 7685 | GO_REGULATION_OF_EXTENT_OF_CELL_GROWTH                               | 0.88 | 0.17 | 0 | 0 | 0 | not significant |
| 7686 | MIKKELSEN_MCV6_HCP_WITH_H3K27ME3                                     | 0.88 | 0.17 | 0 | 0 | 0 | not significant |
| 7687 | REACTOME_MEIOTIC_SYNOPSIS                                            | 0.88 | 0.17 | 0 | 0 | 0 | not significant |
| 7688 | BOSCO_ALLERGEN_INDUCED_TH2_ASSOCIATED_MODULE                         | 0.88 | 0.16 | 0 | 0 | 0 | not significant |
| 7689 | GO_HISTONE_DEACETYLASE_COMPLEX                                       | 0.88 | 0.16 | 0 | 0 | 0 | not significant |
| 7690 | GO_NEGATIVE_REGULATION_OF_CELL_PROJECTION_ORGANIZATION               | 0.88 | 0.16 | 0 | 0 | 0 | not significant |
| 7691 | REACTOME_G_ALPHA_Q_SIGNALLING_EVENTS                                 | 0.88 | 0.16 | 0 | 0 | 0 | not significant |
| 7692 | GO_RESPONSE_TO_TRANSFORMING_GROWTH_FACTOR_BETA                       | 0.88 | 0.15 | 0 | 0 | 0 | not significant |
| 7693 | GO_MUSCLE_CONTRACTION                                                | 0.88 | 0.14 | 0 | 0 | 0 | not significant |
| 7694 | GO_REGULATION_OF_CELLULAR_COMPONENT_SIZE                             | 0.88 | 0.12 | 0 | 0 | 0 | not significant |
| 7695 | GO_REPRODUCTIVE_SYSTEM_DEVELOPMENT                                   | 0.88 | 0.11 | 0 | 0 | 0 | not significant |
| 7696 | BLALOCK_ALZHEIMERS_DISEASE_INCIPENT_UP                               | 0.88 | 0.1  | 0 | 0 | 0 | not significant |
| 7697 | GO_REGULATION_OF_GROWTH                                              | 0.88 | 0.1  | 0 | 0 | 0 | not significant |
| 7698 | GO_RESPONSE_TO_WOUNDING                                              | 0.88 | 0.09 | 0 | 0 | 0 | not significant |
| 7699 | GO_NEURON_DIFFERENTIATION                                            | 0.88 | 0.06 | 0 | 0 | 0 | not significant |
| 7700 | GO_POSITIVE_REGULATION_OF_DENDRITIC_SPINE_MORPHOGENESIS              | 0.89 | 0.23 | 0 | 0 | 0 | not significant |
| 7701 | GO_REGULATION_OF_SMOOTH_MUSCLE_CELL_DIFFERENTIATION                  | 0.89 | 0.23 | 0 | 0 | 0 | not significant |
| 7702 | CAFFAREL_RESPONSE_TO_THC_24HR_3_UP                                   | 0.89 | 0.22 | 0 | 0 | 0 | not significant |
| 7703 | GO_DNA_INSERTION_OR_DELETION_BINDING                                 | 0.89 | 0.22 | 0 | 0 | 0 | not significant |
| 7704 | GO_ENDOCARDIAL_CUSHION_FORMATION                                     | 0.89 | 0.22 | 0 | 0 | 0 | not significant |
| 7705 | GO_MONOCARBOXYLIC_ACID_TRANSMEMBRANE_TRANSPORTER_ACTIVITY            | 0.89 | 0.22 | 0 | 0 | 0 | not significant |
| 7706 | GO_NEGATIVE_REGULATION_OF_EPIDERMAL_GROWTH_FACTOR_ACTIVATED_REC      | 0.89 | 0.22 | 0 | 0 | 0 | not significant |
| 7707 | GO_PINOCYTOSIS                                                       | 0.89 | 0.22 | 0 | 0 | 0 | not significant |
| 7708 | GO_PRESYNAPTIC_MODULATION_OF_CHEMICAL_SYNAPTIC_TRANSMISSION          | 0.89 | 0.22 | 0 | 0 | 0 | not significant |
| 7709 | GO_PURINE_NUCLEOTIDE_TRANSPORT                                       | 0.89 | 0.22 | 0 | 0 | 0 | not significant |
| 7710 | GO_SYNAPTIC_MEMBRANE_ADHESION                                        | 0.89 | 0.22 | 0 | 0 | 0 | not significant |
| 7711 | KORKOLA_TERATOMA_UP                                                  | 0.89 | 0.22 | 0 | 0 | 0 | not significant |
| 7712 | LIANG_HEMATOPOIESIS_STEM_CELL_NUMBER_LARGE_VS_TINY_UP                | 0.89 | 0.22 | 0 | 0 | 0 | not significant |
| 7713 | PID_S1P_S1P3_PATHWAY                                                 | 0.89 | 0.22 | 0 | 0 | 0 | not significant |
| 7714 | REACTOME_NRF_SIGNALS_CELL_DEATH_FROM_THE_NUCLEUS                     | 0.89 | 0.22 | 0 | 0 | 0 | not significant |
| 7715 | SUZUKI_RESPONSE_TO_TSA_AND_DECITABINE_1A                             | 0.89 | 0.22 | 0 | 0 | 0 | not significant |
| 7716 | CERIBELLI_GENES_INACTIVE_AND_BOUND_BY_NFY                            | 0.89 | 0.21 | 0 | 0 | 0 | not significant |
| 7717 | GO_BASEMENT_MEMBRANE_ORGANIZATION                                    | 0.89 | 0.21 | 0 | 0 | 0 | not significant |
| 7718 | GO_DNA_REPLICATION_SYNTHESIS_OF_RNA_PRIMER                           | 0.89 | 0.21 | 0 | 0 | 0 | not significant |
| 7719 | GO_MAST_CELL_MEDIATED_IMMUNITY                                       | 0.89 | 0.21 | 0 | 0 | 0 | not significant |
| 7720 | GO_NEPHRON_EPITHELIUM_DEVELOPMENT                                    | 0.89 | 0.21 | 0 | 0 | 0 | not significant |
| 7721 | GO_NEURON_PROJECTION_MAINTENANCE                                     | 0.89 | 0.21 | 0 | 0 | 0 | not significant |
| 7722 | GO_PYRIMIDINE_DEOXYRIBONUCLEOTIDE_BIOSYNTHETIC_PROCESS               | 0.89 | 0.21 | 0 | 0 | 0 | not significant |
| 7723 | GO_RECEPTOR_CATABOLIC_PROCESS                                        | 0.89 | 0.21 | 0 | 0 | 0 | not significant |
| 7724 | GO_SUBSTRATE_DEPENDENT_CELL_MIGRATION                                | 0.89 | 0.21 | 0 | 0 | 0 | not significant |
| 7725 | GO_VITAMIN_B6_BINDING                                                | 0.89 | 0.21 | 0 | 0 | 0 | not significant |
| 7726 | RIZ_ERYTHROID_DIFFERENTIATION_HBZ                                    | 0.89 | 0.21 | 0 | 0 | 0 | not significant |
| 7727 | WATTEL_AUTONOMOUS_THYROID_ADENOMA_UP                                 | 0.89 | 0.21 | 0 | 0 | 0 | not significant |

|      |                                                                   |      |      |   |   |   |                 |
|------|-------------------------------------------------------------------|------|------|---|---|---|-----------------|
| 7728 | CEBALLOS_TARGETS_OF_TP53_AND_MYC_DN                               | 0.89 | 0.2  | 0 | 0 | 0 | not significant |
| 7729 | GO_ACROSOMAL_VESICLE                                              | 0.89 | 0.2  | 0 | 0 | 0 | not significant |
| 7730 | GO_BODY_FLUID_SECRETION                                           | 0.89 | 0.2  | 0 | 0 | 0 | not significant |
| 7731 | GO_CENTROSOME_DUPLICATION                                         | 0.89 | 0.2  | 0 | 0 | 0 | not significant |
| 7732 | GO_ER_TO_GOLGI_TRANSPORT_VESICLE_MEMBRANE                         | 0.89 | 0.2  | 0 | 0 | 0 | not significant |
| 7733 | GO_MECHANORECEPTOR_DIFFERENTIATION                                | 0.89 | 0.2  | 0 | 0 | 0 | not significant |
| 7734 | GO_NEGATIVE_REGULATION_OF_ANTIEN_RECEPTOR_MEDIATED_SIGNALING_PA1  | 0.89 | 0.2  | 0 | 0 | 0 | not significant |
| 7735 | GO_POSITIVE_REGULATION_OF_DNA_CATABOLIC_PROCESS                   | 0.89 | 0.2  | 0 | 0 | 0 | not significant |
| 7736 | GO_REGULATION_OF_DNA_CATABOLIC_PROCESS                            | 0.89 | 0.2  | 0 | 0 | 0 | not significant |
| 7737 | GO_REGULATION_OF_TISSUE_REMODELING                                | 0.89 | 0.2  | 0 | 0 | 0 | not significant |
| 7738 | GO_SMAD_PROTEIN_COMPLEX                                           | 0.89 | 0.2  | 0 | 0 | 0 | not significant |
| 7739 | GO_TETRAPYRROLE_BINDING                                           | 0.89 | 0.2  | 0 | 0 | 0 | not significant |
| 7740 | GO_TETRAPYRROLE_BIOSYNTHETIC_PROCESS                              | 0.89 | 0.2  | 0 | 0 | 0 | not significant |
| 7741 | GO_TRAIL_ACTIVATED_APOPTOTIC_SIGNALING_PATHWAY                    | 0.89 | 0.2  | 0 | 0 | 0 | not significant |
| 7742 | KUROKAWA_LIVER_CANCER_EARLY_RECURRENCE_DN                         | 0.89 | 0.2  | 0 | 0 | 0 | not significant |
| 7743 | REACTOME_SIGNALING_BY_ERBB4                                       | 0.89 | 0.2  | 0 | 0 | 0 | not significant |
| 7744 | TCGA_GLIOMASTOMA_COPY_NUMBER_DN                                   | 0.89 | 0.2  | 0 | 0 | 0 | not significant |
| 7745 | WESTON_VEGFA_TARGETS_12HR                                         | 0.89 | 0.2  | 0 | 0 | 0 | not significant |
| 7746 | ZHAN_MULTIPLE_MYELOMA_MF_DN                                       | 0.89 | 0.2  | 0 | 0 | 0 | not significant |
| 7747 | BIOCARTA_CIRCADIAN_PATHWAY                                        | 0.89 | 0.19 | 0 | 0 | 0 | not significant |
| 7748 | GO_CARBOHYDRATE_TRANSMEMBRANE_TRANSPORT                           | 0.89 | 0.19 | 0 | 0 | 0 | not significant |
| 7749 | GO_FLAVIN_ADENINE_DINUCLEOTIDE_BINDING                            | 0.89 | 0.19 | 0 | 0 | 0 | not significant |
| 7750 | GO_GLYUCOSIDASE_ACTIVITY                                          | 0.89 | 0.19 | 0 | 0 | 0 | not significant |
| 7751 | GO_LEADING_EDGE_MEMBRANE                                          | 0.89 | 0.19 | 0 | 0 | 0 | not significant |
| 7752 | GO_LEUKOCYTE_APOPTOTIC_PROCESS                                    | 0.89 | 0.19 | 0 | 0 | 0 | not significant |
| 7753 | GO_NEGATIVE_REGULATION_OF_DEPHOSPHORYLATION                       | 0.89 | 0.19 | 0 | 0 | 0 | not significant |
| 7754 | GO_NEGATIVE_REGULATION_OF_PROTEIN_COMPLEX_DISASSEMBLY             | 0.89 | 0.19 | 0 | 0 | 0 | not significant |
| 7755 | GO_POSITIVE_REGULATION_OF_NIK_NF_KAPPAB_SIGNALING                 | 0.89 | 0.19 | 0 | 0 | 0 | not significant |
| 7756 | REACTOME_LONG_TERM_POTENTIATION                                   | 0.89 | 0.19 | 0 | 0 | 0 | not significant |
| 7757 | REACTOME_SIGNALING_BY_INSULIN_RECEPTOR                            | 0.89 | 0.19 | 0 | 0 | 0 | not significant |
| 7758 | REACTOME_TP53_REGULATES_TRANSCRIPTION_OF_DNA_REPAIR_GENES         | 0.89 | 0.19 | 0 | 0 | 0 | not significant |
| 7759 | SMID_BREAST_CANCER_RELAPSE_IN_BRAIN_DN                            | 0.89 | 0.19 | 0 | 0 | 0 | not significant |
| 7760 | GO_ACTIN_CYTOSKELETON_REORGANIZATION                              | 0.89 | 0.18 | 0 | 0 | 0 | not significant |
| 7761 | GO_APOPTOTIC_MITOCHONDRIAL_CHANGES                                | 0.89 | 0.18 | 0 | 0 | 0 | not significant |
| 7762 | GO_EXTRINSIC_APOPTOTIC_SIGNALING_PATHWAY_VIA_DEATH_DOMAIN_RECEPTO | 0.89 | 0.18 | 0 | 0 | 0 | not significant |
| 7763 | GO_NEGATIVE_REGULATION_OF_ION_TRANSMEMBRANE_TRANSPORT             | 0.89 | 0.18 | 0 | 0 | 0 | not significant |
| 7764 | DARWICHE_SQUAMOUS_CELL_CARCINOMA_DN                               | 0.89 | 0.17 | 0 | 0 | 0 | not significant |
| 7765 | GO_BONE_DEVELOPMENT                                               | 0.89 | 0.17 | 0 | 0 | 0 | not significant |
| 7766 | GO_EMBRYONIC_ORGAN_MORPHOGENESIS                                  | 0.89 | 0.17 | 0 | 0 | 0 | not significant |
| 7767 | GO_NUCLEASE_ACTIVITY                                              | 0.89 | 0.17 | 0 | 0 | 0 | not significant |
| 7768 | GO_REGULATION_OF_CALCIIUM_IION_TRANSPORT                          | 0.89 | 0.17 | 0 | 0 | 0 | not significant |
| 7769 | GO_TISSUE_REMODELING                                              | 0.89 | 0.17 | 0 | 0 | 0 | not significant |
| 7770 | GO_POSITIVE_REGULATION_OF_NEURON_PROJECTION_DEVELOPMENT           | 0.89 | 0.16 | 0 | 0 | 0 | not significant |
| 7771 | KYNG_DNA_DAMAGE_UP                                                | 0.89 | 0.16 | 0 | 0 | 0 | not significant |
| 7772 | GO_REGULATION_OF_RESPONSE_TO_DNA_DAMAGE_STIMULUS                  | 0.89 | 0.15 | 0 | 0 | 0 | not significant |
| 7773 | GO_EMBRYONIC_ORGAN_DEVELOPMENT                                    | 0.89 | 0.14 | 0 | 0 | 0 | not significant |
| 7774 | GO_IMMUNE_RESPONSE_REGULATING_CELL_SURFACE_RECEPTOR_SIGNALING_P/  | 0.89 | 0.14 | 0 | 0 | 0 | not significant |
| 7775 | GO_PRESYNAPSE                                                     | 0.89 | 0.14 | 0 | 0 | 0 | not significant |
| 7776 | GO_CELL_CYCLE_G1_S_PHASE_TRANSITION                               | 0.89 | 0.13 | 0 | 0 | 0 | not significant |
| 7777 | GO_MYELOID_CELL_DIFFERENTIATION                                   | 0.89 | 0.13 | 0 | 0 | 0 | not significant |
| 7778 | SWEET_LUNG_CANCER_KRAS_UP                                         | 0.89 | 0.12 | 0 | 0 | 0 | not significant |
| 7779 | GO_REGULATION_OF_KINASE_ACTIVITY                                  | 0.89 | 0.1  | 0 | 0 | 0 | not significant |
| 7780 | GO_NEGATIVE_REGULATION_OF_RNA_BIOSYNTHETIC_PROCESS                | 0.89 | 0.08 | 0 | 0 | 0 | not significant |
| 7781 | GO_REGULATION_OF_CELLULAR_LOCALIZATION                            | 0.89 | 0.08 | 0 | 0 | 0 | not significant |
| 7782 | ACEVEDO_LIVER_CANCER_UP                                           | 0.89 | 0.07 | 0 | 0 | 0 | not significant |
| 7783 | GO_IDENTICAL_PROTEIN_BINDING                                      | 0.89 | 0.06 | 0 | 0 | 0 | not significant |
| 7784 | CHR13Q31                                                          | 0.90 | 0.24 | 0 | 0 | 0 | not significant |
| 7785 | GO_NEGATIVE_REGULATION_OF_MORPHOGENESIS_OF_AN_EPITHELIUM          | 0.90 | 0.24 | 0 | 0 | 0 | not significant |
| 7786 | GO_POSITIVE_REGULATION_OF_CYTOPLASMIC_TRANSPORT                   | 0.90 | 0.24 | 0 | 0 | 0 | not significant |
| 7787 | GO_PROGESTERONE_RECEPTOR_SIGNALING_PATHWAY                        | 0.90 | 0.24 | 0 | 0 | 0 | not significant |
| 7788 | GO_TRANSMEMBRANE_RECEPTOR_PROTEIN_TYROSINE_KINASE_ADAPTOR_ACTIV   | 0.90 | 0.24 | 0 | 0 | 0 | not significant |
| 7789 | PID_GLYPICAN_1PATHWAY                                             | 0.90 | 0.24 | 0 | 0 | 0 | not significant |
| 7790 | CHR10P11                                                          | 0.90 | 0.23 | 0 | 0 | 0 | not significant |
| 7791 | DAVICIONI_PAX_FOXO1_SIGNATURE_IN_ARMS_DN                          | 0.90 | 0.23 | 0 | 0 | 0 | not significant |
| 7792 | GO_AROMATIC_AMINO_ACID_FAMILY_METABOLIC_PROCESS                   | 0.90 | 0.23 | 0 | 0 | 0 | not significant |
| 7793 | GO_ESTABLISHMENT_OF_PIGMENT_GRANULE_LOCALIZATION                  | 0.90 | 0.23 | 0 | 0 | 0 | not significant |
| 7794 | GO_NEGATIVE_REGULATION_OF_NECROTIC_CELL_DEATH                     | 0.90 | 0.23 | 0 | 0 | 0 | not significant |
| 7795 | GO_NEGATIVE_REGULATION_OF_TELOMERE_CAPPING                        | 0.90 | 0.23 | 0 | 0 | 0 | not significant |
| 7796 | GO_RAB_GUANYL_NUCLEOTIDE_EXCHANGE_FACTOR_ACTIVITY                 | 0.90 | 0.23 | 0 | 0 | 0 | not significant |
| 7797 | BANDRES_RESPONSE_TO_CARMUSTIN_MGMT_48HR_UP                        | 0.90 | 0.22 | 0 | 0 | 0 | not significant |
| 7798 | CHR5Q15                                                           | 0.90 | 0.22 | 0 | 0 | 0 | not significant |
| 7799 | CROMER_TUMORIGENESIS_DN                                           | 0.90 | 0.22 | 0 | 0 | 0 | not significant |
| 7800 | DANG_MYC_TARGETS_DN                                               | 0.90 | 0.22 | 0 | 0 | 0 | not significant |
| 7801 | GAUSSMANN_MLL_AF4_FUSION_TARGETS_A_DN                             | 0.90 | 0.22 | 0 | 0 | 0 | not significant |
| 7802 | GO_AMMONIUM_TRANSMEMBRANE_TRANSPORT                               | 0.90 | 0.22 | 0 | 0 | 0 | not significant |
| 7803 | GO_CELLULAR_BIOGENIC_AMINE_METABOLIC_PROCESS                      | 0.90 | 0.22 | 0 | 0 | 0 | not significant |
| 7804 | GO_DNA_METHYLATION_OR_DEMETHYLATION                               | 0.90 | 0.22 | 0 | 0 | 0 | not significant |
| 7805 | GO_ISOCITRATE_DEHYDROGENASE_ACTIVITY                              | 0.90 | 0.22 | 0 | 0 | 0 | not significant |
| 7806 | GO_MEMBRANE_REPOLARIZATION_DURING_ACTION_POTENTIAL                | 0.90 | 0.22 | 0 | 0 | 0 | not significant |
| 7807 | GO_NEGATIVE_REGULATION_OF_LYMPHOCYTE_APOPTOTIC_PROCESS            | 0.90 | 0.22 | 0 | 0 | 0 | not significant |
| 7808 | GO_NEGATIVE_REGULATION_OF_NEUROTRANSMITTER_TRANSPORT              | 0.90 | 0.22 | 0 | 0 | 0 | not significant |
| 7809 | GO_PHOSPHOTRANSFERASE_ACTIVITY_PHOSPHATE_GROUP_AS_ACCEPTOR        | 0.90 | 0.22 | 0 | 0 | 0 | not significant |
| 7810 | GO_POSITIVE_REGULATION_OF_FAT_CELL_DIFFERENTIATION                | 0.90 | 0.22 | 0 | 0 | 0 | not significant |
| 7811 | GO_POSITIVE_REGULATION_OF_PROTEIN_EXIT_FROM_ENDOPLASMIC_RETICULUM | 0.90 | 0.22 | 0 | 0 | 0 | not significant |
| 7812 | GO_PROTEIN_AUTUBIQUITINATION                                      | 0.90 | 0.22 | 0 | 0 | 0 | not significant |
| 7813 | GO_PROTEIN_IMPORT_INTO_PEROXISOME_MATRIX                          | 0.90 | 0.22 | 0 | 0 | 0 | not significant |
| 7814 | GO_REGULATION_OF_BEHAVIOR                                         | 0.90 | 0.22 | 0 | 0 | 0 | not significant |
| 7815 | GO_TRAPP_COMPLEX                                                  | 0.90 | 0.22 | 0 | 0 | 0 | not significant |
| 7816 | GO_UDP_GALACTOSYLTRANSFERASE_ACTIVITY                             | 0.90 | 0.22 | 0 | 0 | 0 | not significant |
| 7817 | GO_VIRAL_RNA_GENOME_REPLICATION                                   | 0.90 | 0.22 | 0 | 0 | 0 | not significant |
| 7818 | HEIDENBLAD_AMPLICON_12P11_12_DN                                   | 0.90 | 0.22 | 0 | 0 | 0 | not significant |
| 7819 | KIM_GLI2_TARGETS_UP                                               | 0.90 | 0.22 | 0 | 0 | 0 | not significant |
| 7820 | REACTOME_PRESYNAPTIC_DEPOLARIZATION_AND_CALCIIUM_CHANNEL_OPENING  | 0.90 | 0.22 | 0 | 0 | 0 | not significant |
| 7821 | REACTOME_RHO_GTPASES_ACTIVATE_CIT                                 | 0.90 | 0.22 | 0 | 0 | 0 | not significant |
| 7822 | VETTER_TARGETS_OF_PRKCA_AND_ETS1_UP                               | 0.90 | 0.22 | 0 | 0 | 0 | not significant |
| 7823 | CHR14Q12                                                          | 0.90 | 0.21 | 0 | 0 | 0 | not significant |
| 7824 | DOANE_BREAST_CANCER_CLASSES_DN                                    | 0.90 | 0.21 | 0 | 0 | 0 | not significant |
| 7825 | GO_CELL_DIVISION_SITE                                             | 0.90 | 0.21 | 0 | 0 | 0 | not significant |
| 7826 | GO_ETHER_METABOLIC_PROCESS                                        | 0.90 | 0.21 | 0 | 0 | 0 | not significant |
| 7827 | GO_GROWTH_FACTOR_RECEPTOR_BINDING                                 | 0.90 | 0.21 | 0 | 0 | 0 | not significant |
| 7828 | GO_LIPID_GLYCOSYLATION                                            | 0.90 | 0.21 | 0 | 0 | 0 | not significant |
| 7829 | GO_NEGATIVE_REGULATION_OF_ERK1_AND_ERK2_CASCADE                   | 0.90 | 0.21 | 0 | 0 | 0 | not significant |
| 7830 | GO_NEGATIVE_REGULATION_OF_UBIQUITIN_PROTEIN_LIGASE_ACTIVITY       | 0.90 | 0.21 | 0 | 0 | 0 | not significant |
| 7831 | GO_NEURAL_CREST_CELL_MIGRATION                                    | 0.90 | 0.21 | 0 | 0 | 0 | not significant |
| 7832 | GO_PERICENTRIOLAR_MATERIAL                                        | 0.90 | 0.21 | 0 | 0 | 0 | not significant |
| 7833 | GO_POSITIVE_REGULATION_OF_SYNAPTIC_TRANSMISSION_GlutAMATERGIC     | 0.90 | 0.21 | 0 | 0 | 0 | not significant |
| 7834 | GO_POSTREPLICATION_REPAIR                                         | 0.90 | 0.21 | 0 | 0 | 0 | not significant |
| 7835 | GO_REGULATION_OF_MITOCHONDRIAL_FISSION                            | 0.90 | 0.21 | 0 | 0 | 0 | not significant |
| 7836 | GO_REGULATION_OF_PROTEIN_DEACETYLATION                            | 0.90 | 0.21 | 0 | 0 | 0 | not significant |

|      |                                                                    |      |      |   |   |   |                 |
|------|--------------------------------------------------------------------|------|------|---|---|---|-----------------|
| 7837 | GO_REPLICATION_FORK_PROTECTION_COMPLEX                             | 0.90 | 0.21 | 0 | 0 | 0 | not significant |
| 7838 | GO_TAT_PROTEIN_BINDING                                             | 0.90 | 0.21 | 0 | 0 | 0 | not significant |
| 7839 | LANDIS_BREAST_CANCER_PROGRESSION_DN                                | 0.90 | 0.21 | 0 | 0 | 0 | not significant |
| 7840 | LASTOWSKA_COAMPLIFIED_WITH_MYCN                                    | 0.90 | 0.21 | 0 | 0 | 0 | not significant |
| 7841 | LUI_THYROID_CANCER_PAX8_PPARG_DN                                   | 0.90 | 0.21 | 0 | 0 | 0 | not significant |
| 7842 | MARIADASON_RESPONSE_TO_BUTYRATE_SULINDAC_6                         | 0.90 | 0.21 | 0 | 0 | 0 | not significant |
| 7843 | SCIBETTA_KDMSB_TARGETS_UP                                          | 0.90 | 0.21 | 0 | 0 | 0 | not significant |
| 7844 | CAFFAREL_RESPONSE_TO_THC_24HR_5_DN                                 | 0.90 | 0.2  | 0 | 0 | 0 | not significant |
| 7845 | GO_ASTROCYTE_CELL_MIGRATION                                        | 0.90 | 0.2  | 0 | 0 | 0 | not significant |
| 7846 | GO_GLYCOSPHINGOLIPID_BIOSYNTHETIC_PROCESS                          | 0.90 | 0.2  | 0 | 0 | 0 | not significant |
| 7847 | GO_NEGATIVE_REGULATION_OF_PROTEIN_MODIFICATION_BY_SMALL_PROTEIN_C  | 0.90 | 0.2  | 0 | 0 | 0 | not significant |
| 7848 | GO_NUCLEOBASE_CONTAINING_COMPOUND_TRANSMEMBRANE_TRANSPORTER_A      | 0.90 | 0.2  | 0 | 0 | 0 | not significant |
| 7849 | GO_POSITIVE_REGULATION_OF_MEMBRANE_PERMEABILITY                    | 0.90 | 0.2  | 0 | 0 | 0 | not significant |
| 7850 | GO_POSITIVE_REGULATION_OF_RESPONSE_TO_WOUNDING                     | 0.90 | 0.2  | 0 | 0 | 0 | not significant |
| 7851 | KAUFFMANN_MELANOMA_RELAPSE_DN                                      | 0.90 | 0.2  | 0 | 0 | 0 | not significant |
| 7852 | KEGG_ADIPOCYTOKINE_SIGNALING_PATHWAY                               | 0.90 | 0.2  | 0 | 0 | 0 | not significant |
| 7853 | KEGG_CHRONIC_MYELOID_LEUKEMIA                                      | 0.90 | 0.2  | 0 | 0 | 0 | not significant |
| 7854 | KIM_WT1_TARGETS_12HR_UP                                            | 0.90 | 0.2  | 0 | 0 | 0 | not significant |
| 7855 | MIKKELSEN_MEF_LCP_WITH_H3K4ME3                                     | 0.90 | 0.2  | 0 | 0 | 0 | not significant |
| 7856 | VARELA_ZMPSTE24_TARGETS_DN                                         | 0.90 | 0.2  | 0 | 0 | 0 | not significant |
| 7857 | GO_CHORION_DEVELOPMENT                                             | 0.90 | 0.19 | 0 | 0 | 0 | not significant |
| 7858 | GO_GLUCAN_METABOLIC_PROCESS                                        | 0.90 | 0.19 | 0 | 0 | 0 | not significant |
| 7859 | GO_POSITIVE_REGULATION_OF_AUTOPHAGY                                | 0.90 | 0.19 | 0 | 0 | 0 | not significant |
| 7860 | GO_POSITIVE_REGULATION_OF_TRANSMEMBRANE_TRANSPORT                  | 0.90 | 0.19 | 0 | 0 | 0 | not significant |
| 7861 | GO_REGULATION_OF_MYELOID_LEUKOCYTE_DIFFERENTIATION                 | 0.90 | 0.19 | 0 | 0 | 0 | not significant |
| 7862 | GO_REGULATION_OF_RELEASE_OF_CYTOCHROME_C_FROM_MITOCHONDRIA         | 0.90 | 0.19 | 0 | 0 | 0 | not significant |
| 7863 | GO_RENAL_TUBULE_DEVELOPMENT                                        | 0.90 | 0.19 | 0 | 0 | 0 | not significant |
| 7864 | GO_SITE_OF_POLARIZED_GROWTH                                        | 0.90 | 0.19 | 0 | 0 | 0 | not significant |
| 7865 | GO_VITAMIN_METABOLIC_PROCESS                                       | 0.90 | 0.19 | 0 | 0 | 0 | not significant |
| 7866 | KRAS_DF.V1_DN                                                      | 0.90 | 0.19 | 0 | 0 | 0 | not significant |
| 7867 | MIKKELSEN_MEF_HCP_WITH_H3K27ME3                                    | 0.90 | 0.19 | 0 | 0 | 0 | not significant |
| 7868 | GO_NEGATIVE_REGULATION_OF_CELLULAR_AMIDE_METABOLIC_PROCESS         | 0.90 | 0.18 | 0 | 0 | 0 | not significant |
| 7869 | PECE_MAMMARY_STEM_CELL_UP                                          | 0.90 | 0.18 | 0 | 0 | 0 | not significant |
| 7870 | GO_RECEPTOR_METABOLIC_PROCESS                                      | 0.90 | 0.17 | 0 | 0 | 0 | not significant |
| 7871 | GREGORY_SYNTHETIC_LETHAL_WITH_IMATINIB                             | 0.90 | 0.17 | 0 | 0 | 0 | not significant |
| 7872 | MARKEY_RB1_ACUTE_LOF_DN                                            | 0.90 | 0.17 | 0 | 0 | 0 | not significant |
| 7873 | RAF_UP.V1_DN                                                       | 0.90 | 0.17 | 0 | 0 | 0 | not significant |
| 7874 | GO_JNK_CASCADE                                                     | 0.90 | 0.16 | 0 | 0 | 0 | not significant |
| 7875 | GO_REGULATION_OF_NEURON_PROJECTION_DEVELOPMENT                     | 0.90 | 0.15 | 0 | 0 | 0 | not significant |
| 7876 | GO_REGULATION_OF_GTPASE_ACTIVITY                                   | 0.90 | 0.14 | 0 | 0 | 0 | not significant |
| 7877 | GO_CILIUM_ORGANIZATION                                             | 0.90 | 0.13 | 0 | 0 | 0 | not significant |
| 7878 | GO_ACTIN_FILAMENT_BASED_PROCESS                                    | 0.90 | 0.11 | 0 | 0 | 0 | not significant |
| 7879 | GO_NEURON_DEVELOPMENT                                              | 0.90 | 0.1  | 0 | 0 | 0 | not significant |
| 7880 | GO_CELLULAR_COMPONENT_MORPHOGENESIS                                | 0.90 | 0.09 | 0 | 0 | 0 | not significant |
| 7881 | GO_RETINAL_GANGLION_CELL_AXON_GUIDANCE                             | 0.91 | 0.25 | 0 | 0 | 0 | not significant |
| 7882 | WONG_IFNA2_RESISTANCE_DN                                           | 0.91 | 0.25 | 0 | 0 | 0 | not significant |
| 7883 | BIOCARTA_D4GDI_PATHWAY                                             | 0.91 | 0.24 | 0 | 0 | 0 | not significant |
| 7884 | DACOSTA_UV_RESPONSE_VIA_ERCC3_XPCS_UP                              | 0.91 | 0.24 | 0 | 0 | 0 | not significant |
| 7885 | GO_ATRIAL_CARDIAC_MUSCLE_CELL_TO_AV_NODE_CELL_SIGNALING            | 0.91 | 0.24 | 0 | 0 | 0 | not significant |
| 7886 | GO_CARDIAC_ATRIUM_DEVELOPMENT                                      | 0.91 | 0.24 | 0 | 0 | 0 | not significant |
| 7887 | GO_CELL_DIFFERENTIATION_INVOLVED_IN_EMBRYONIC_PLACENTA_DEVELOPMENT | 0.91 | 0.24 | 0 | 0 | 0 | not significant |
| 7888 | GO_CLEAVAGE_FURROW                                                 | 0.91 | 0.24 | 0 | 0 | 0 | not significant |
| 7889 | GO_NEGATIVE_REGULATION_OF_INTERLEUKIN_12_PRODUCTION                | 0.91 | 0.24 | 0 | 0 | 0 | not significant |
| 7890 | GO_POSTSYNAPTIC_DENSITY_INTRACELLULAR_COMPONENT                    | 0.91 | 0.24 | 0 | 0 | 0 | not significant |
| 7891 | GO_POSTSYNAPTIC_SPECIALIZATION_ORGANIZATION                        | 0.91 | 0.24 | 0 | 0 | 0 | not significant |
| 7892 | GO_RECEPTOR_LOCALIZATION_TO_SYNAPSE                                | 0.91 | 0.24 | 0 | 0 | 0 | not significant |
| 7893 | KYNG_WERNER_SYNDROM_UP                                             | 0.91 | 0.24 | 0 | 0 | 0 | not significant |
| 7894 | OUELLET_OVARIAN_CANCER_INVASIVE_VS_LMP_DN                          | 0.91 | 0.24 | 0 | 0 | 0 | not significant |
| 7895 | REACTOME_CARBOXYTERMINAL_POST_TRANSLATIONAL_MODIFICATIONS_OF_TUB   | 0.91 | 0.24 | 0 | 0 | 0 | not significant |
| 7896 | SASSON_RESPONSE_TO_FORSKOLIN_UP                                    | 0.91 | 0.24 | 0 | 0 | 0 | not significant |
| 7897 | BIOCARTA_ACH_PATHWAY                                               | 0.91 | 0.23 | 0 | 0 | 0 | not significant |
| 7898 | CASTELLANO_NRAS_TARGETS_DN                                         | 0.91 | 0.23 | 0 | 0 | 0 | not significant |
| 7899 | CHRXQ24                                                            | 0.91 | 0.23 | 0 | 0 | 0 | not significant |
| 7900 | GO_ANGIOTENSIN_RECEPTOR_BINDING                                    | 0.91 | 0.23 | 0 | 0 | 0 | not significant |
| 7901 | GO_CHONDROITIN_SULFATE_BIOSYNTHETIC_PROCESS                        | 0.91 | 0.23 | 0 | 0 | 0 | not significant |
| 7902 | GO_CONVERGENT_EXTENSION                                            | 0.91 | 0.23 | 0 | 0 | 0 | not significant |
| 7903 | GO_ESCRT_COMPLEX                                                   | 0.91 | 0.23 | 0 | 0 | 0 | not significant |
| 7904 | GO_N_TERMINAL_PROTEIN_LIPIDATION                                   | 0.91 | 0.23 | 0 | 0 | 0 | not significant |
| 7905 | GO_ORGAN_OR_TISSUE_SPECIFIC_IMMUNE_RESPONSE                        | 0.91 | 0.23 | 0 | 0 | 0 | not significant |
| 7906 | GO_POSITIVE_REGULATION_OF_MEMBRANE_PROTEIN_ECTODOMAIN_PROTEOLYSIS  | 0.91 | 0.23 | 0 | 0 | 0 | not significant |
| 7907 | GO_REGULATION_OF_GLUCCOSE_METABOLIC_PROCESS                        | 0.91 | 0.23 | 0 | 0 | 0 | not significant |
| 7908 | GO_REGULATION_OF_PROTEIN_DEPOLYMERIZATION                          | 0.91 | 0.23 | 0 | 0 | 0 | not significant |
| 7909 | GO_SERINE_TYPE_CARBOXYPEPTIDASE_ACTIVITY                           | 0.91 | 0.23 | 0 | 0 | 0 | not significant |
| 7910 | GO_SPECIFIC_GRANULE_LUMEN                                          | 0.91 | 0.23 | 0 | 0 | 0 | not significant |
| 7911 | GO_TELOMERIC_D_LOOP_DISASSEMBLY                                    | 0.91 | 0.23 | 0 | 0 | 0 | not significant |
| 7912 | KEGG_RENIN_ANGIOTENSIN_SYSTEM                                      | 0.91 | 0.23 | 0 | 0 | 0 | not significant |
| 7913 | ONDER_CDH1_TARGETS_3_DN                                            | 0.91 | 0.23 | 0 | 0 | 0 | not significant |
| 7914 | REACTOME_DISEASES_ASSOCIATED_WITH_GLYCOSYLATION_PRECURSOR_BIOSY    | 0.91 | 0.23 | 0 | 0 | 0 | not significant |
| 7915 | REACTOME_DNA_REPLICATION_INITIATION                                | 0.91 | 0.23 | 0 | 0 | 0 | not significant |
| 7916 | REACTOME_P13K_AKT_ACTIVATION                                       | 0.91 | 0.23 | 0 | 0 | 0 | not significant |
| 7917 | RUAN_RESPONSE_TO_TROGLITAZONE_DN                                   | 0.91 | 0.23 | 0 | 0 | 0 | not significant |
| 7918 | TSENG_ADIPOGENIC_POTENTIAL_DN                                      | 0.91 | 0.23 | 0 | 0 | 0 | not significant |
| 7919 | UEDA_CENTRAL_CLOCK                                                 | 0.91 | 0.23 | 0 | 0 | 0 | not significant |
| 7920 | ZHENG_RESPONSE_TO_ARSENITE_DN                                      | 0.91 | 0.23 | 0 | 0 | 0 | not significant |
| 7921 | BOYALTY_LIVER_CANCER_SUBCLASS_G1_DN                                | 0.91 | 0.22 | 0 | 0 | 0 | not significant |
| 7922 | GARGALOVIC_RESPONSE_TO_OXIDIZED_PHOSPHOLIPIDS_TAN_DN               | 0.91 | 0.22 | 0 | 0 | 0 | not significant |
| 7923 | GO_CARD_DOMAIN_BINDING                                             | 0.91 | 0.22 | 0 | 0 | 0 | not significant |
| 7924 | GO_CERAMIDE_BIOSYNTHETIC_PROCESS                                   | 0.91 | 0.22 | 0 | 0 | 0 | not significant |
| 7925 | GO_EXTRAEMBRYONIC_MEMBRANE_DEVELOPMENT                             | 0.91 | 0.22 | 0 | 0 | 0 | not significant |
| 7926 | GO_IRE1_MEDIATED_UNFOLDED_PROTEIN_RESPONSE                         | 0.91 | 0.22 | 0 | 0 | 0 | not significant |
| 7927 | GO_MEMBRANE_LIPID_CATABOLIC_PROCESS                                | 0.91 | 0.22 | 0 | 0 | 0 | not significant |
| 7928 | GO_NEGATIVE_REGULATION_OF_DNA_METABOLIC_PROCESS                    | 0.91 | 0.22 | 0 | 0 | 0 | not significant |
| 7929 | GO_NEURON_DEATH_IN_RESPONSE_TO_OXIDATIVE_STRESS                    | 0.91 | 0.22 | 0 | 0 | 0 | not significant |
| 7930 | GO_PHOSPHATIDYLINOSITOL_3_5_BISPHOSPHATE_BINDING                   | 0.91 | 0.22 | 0 | 0 | 0 | not significant |
| 7931 | GO_PHOSPHOLIPASE_INHIBITOR_ACTIVITY                                | 0.91 | 0.22 | 0 | 0 | 0 | not significant |
| 7932 | GO_REGULATION_OF_CELLULAR_CARBOHYDRATE_METABOLIC_PROCESS           | 0.91 | 0.22 | 0 | 0 | 0 | not significant |
| 7933 | GO_REGULATION_OF_INTERLEUKIN_2_SECRETION                           | 0.91 | 0.22 | 0 | 0 | 0 | not significant |
| 7934 | GO_REGULATION_OF_PROTEIN_CATABOLIC_PROCESS_IN_THE_VACUOLE          | 0.91 | 0.22 | 0 | 0 | 0 | not significant |
| 7935 | GUTIERREZ_WALDENSTROEMS_MACROGLOBULINEMIA_1_UP                     | 0.91 | 0.22 | 0 | 0 | 0 | not significant |
| 7936 | HAHTOLA_SEZARY_SYNDROM_UP                                          | 0.91 | 0.22 | 0 | 0 | 0 | not significant |
| 7937 | KAYO_CALORIE_RESTRICTION_MUSCLE_UP                                 | 0.91 | 0.22 | 0 | 0 | 0 | not significant |
| 7938 | KIM_GERMINAL_CENTER_T_HELPER_UP                                    | 0.91 | 0.22 | 0 | 0 | 0 | not significant |
| 7939 | MARTINEZ_RESPONSE_TO_TRABECTEDIN_UP                                | 0.91 | 0.22 | 0 | 0 | 0 | not significant |
| 7940 | MIKKELSEN_MEF_ICP_WITH_H3K27ME3                                    | 0.91 | 0.22 | 0 | 0 | 0 | not significant |
| 7941 | PARK_APL_PATHOGENESIS_DN                                           | 0.91 | 0.22 | 0 | 0 | 0 | not significant |
| 7942 | REACTOME_NEGATIVE_REGULATORS_OF_DDX58_IFI1_SIGNALING               | 0.91 | 0.22 | 0 | 0 | 0 | not significant |
| 7943 | SCHIEDERIT_IKK_INTERACTING_PROTEINS                                | 0.91 | 0.22 | 0 | 0 | 0 | not significant |
| 7944 | BIOCARTA_EICOSANOID_PATHWAY                                        | 0.91 | 0.21 | 0 | 0 | 0 | not significant |
| 7945 | COATES_MACROPHAGE_M1_VS_M2_DN                                      | 0.91 | 0.21 | 0 | 0 | 0 | not significant |

|      |                                                                     |      |      |   |   |   |                 |
|------|---------------------------------------------------------------------|------|------|---|---|---|-----------------|
| 7946 | GO_AP_1_ADAPTOR_COMPLEX_BINDING                                     | 0.91 | 0.21 | 0 | 0 | 0 | not significant |
| 7947 | GO_MORPHOGENESIS_OF_A_BRANCHING_STRUCTURE                           | 0.91 | 0.21 | 0 | 0 | 0 | not significant |
| 7948 | GO_SYNAPTIC_VESICLE_RECYCLING                                       | 0.91 | 0.21 | 0 | 0 | 0 | not significant |
| 7949 | HOLLERN_MICROACINAR_BREAST_TUMOR_DN                                 | 0.91 | 0.21 | 0 | 0 | 0 | not significant |
| 7950 | HUI_MAPK14_TARGETS_UP                                               | 0.91 | 0.21 | 0 | 0 | 0 | not significant |
| 7951 | PID_ERBB1_DOWNSTREAM_PATHWAY                                        | 0.91 | 0.21 | 0 | 0 | 0 | not significant |
| 7952 | GO_GLIAL_CELL_DIFFERENTIATION                                       | 0.91 | 0.19 | 0 | 0 | 0 | not significant |
| 7953 | GO_GOLGI_ORGANIZATION                                               | 0.91 | 0.19 | 0 | 0 | 0 | not significant |
| 7954 | GO_HORMONE_RECEPTOR_BINDING                                         | 0.91 | 0.19 | 0 | 0 | 0 | not significant |
| 7955 | GO_REGULATION_OF_CYSSTEINE_TYPE_ENDOPEPTIDASE_ACTIVITY              | 0.91 | 0.19 | 0 | 0 | 0 | not significant |
| 7956 | HAHTOLA_MYCOSIS_FUNGOIDES_SKIN_UP                                   | 0.91 | 0.19 | 0 | 0 | 0 | not significant |
| 7957 | REACTOME_RHO_GTPASE_CYCLE                                           | 0.91 | 0.19 | 0 | 0 | 0 | not significant |
| 7958 | RODWELL_AGING_KIDNEY_DN                                             | 0.91 | 0.19 | 0 | 0 | 0 | not significant |
| 7959 | GO_LIPID_MODIFICATION                                               | 0.91 | 0.18 | 0 | 0 | 0 | not significant |
| 7960 | KEGG_ENDOCYTOSIS                                                    | 0.91 | 0.18 | 0 | 0 | 0 | not significant |
| 7961 | QI_PLASMACYTOMA_UP                                                  | 0.91 | 0.18 | 0 | 0 | 0 | not significant |
| 7962 | GO_NUCLEOSIDE_PHOSPHATE_METABOLIC_PROCESS                           | 0.91 | 0.17 | 0 | 0 | 0 | not significant |
| 7963 | AGUIRRE_PANCREATIC_CANCER_COPY_NUMBER_UP                            | 0.91 | 0.16 | 0 | 0 | 0 | not significant |
| 7964 | GO_DENDRITIC_TREE                                                   | 0.91 | 0.16 | 0 | 0 | 0 | not significant |
| 7965 | GO_REGULATION_OF_AUTOPHAGY                                          | 0.91 | 0.16 | 0 | 0 | 0 | not significant |
| 7966 | GO_REGULATION_OF_BINDING                                            | 0.91 | 0.16 | 0 | 0 | 0 | not significant |
| 7967 | GO_REGULATION_OF_INTRACELLULAR_PROTEIN_TRANSPORT                    | 0.91 | 0.16 | 0 | 0 | 0 | not significant |
| 7968 | KOYAMA_SEMA3B_TARGETS_DN                                            | 0.91 | 0.16 | 0 | 0 | 0 | not significant |
| 7969 | LOPEZ_MBD_TARGETS                                                   | 0.91 | 0.12 | 0 | 0 | 0 | not significant |
| 7970 | GO_CELL_PROJECTION_ORGANIZATION                                     | 0.91 | 0.1  | 0 | 0 | 0 | not significant |
| 7971 | GO_NEGATIVE_REGULATION_OF_MOLECULAR_FUNCTION                        | 0.91 | 0.1  | 0 | 0 | 0 | not significant |
| 7972 | BONOME_OVARIAN_CANCER_POOR_SURVIVAL_UP                              | 0.92 | 0.26 | 0 | 0 | 0 | not significant |
| 7973 | GO_REGULATION_OF_PROTEIN_TARGETING_TO_MEMBRANE                      | 0.92 | 0.26 | 0 | 0 | 0 | not significant |
| 7974 | REACTOME_ZBP1_DAI_MEDIATED_INDUCTION_OF_TYPE_I_IFNS                 | 0.92 | 0.26 | 0 | 0 | 0 | not significant |
| 7975 | STARK_HYPPOCAMPUS_22Q11_DELETION_DN                                 | 0.92 | 0.26 | 0 | 0 | 0 | not significant |
| 7976 | GO_ACYL_COA_DEHYDROGENASE_ACTIVITY                                  | 0.92 | 0.25 | 0 | 0 | 0 | not significant |
| 7977 | GO_HIGH_DENSITY_LIPOPROTEIN_PARTICLE_ASSEMBLY                       | 0.92 | 0.25 | 0 | 0 | 0 | not significant |
| 7978 | GO_MAST_CELL_ACTIVATION                                             | 0.92 | 0.25 | 0 | 0 | 0 | not significant |
| 7979 | GO_NEGATIVE_REGULATION_OF_CD4_POSITIVE_ALPHA_BETA_T_CELL_ACTIVATIO  | 0.92 | 0.25 | 0 | 0 | 0 | not significant |
| 7980 | GO_NUCLEOTIDE_SUGAR_TRANSMEMBRANE_TRANSPORTER_ACTIVITY              | 0.92 | 0.25 | 0 | 0 | 0 | not significant |
| 7981 | GO_OLIGOSACCHARIDE_BINDING                                          | 0.92 | 0.25 | 0 | 0 | 0 | not significant |
| 7982 | GO_POLY_A_SPECIFIC_RIBONUCLEASE_ACTIVITY                            | 0.92 | 0.25 | 0 | 0 | 0 | not significant |
| 7983 | MOOTHA_FFA_OXYDATION                                                | 0.92 | 0.25 | 0 | 0 | 0 | not significant |
| 7984 | NICK_RESPONSE_TO_PROC_TREATMENT_DN                                  | 0.92 | 0.25 | 0 | 0 | 0 | not significant |
| 7985 | NOUSHMEHR_GBM_SILENCED_BY_METHYLATION                               | 0.92 | 0.25 | 0 | 0 | 0 | not significant |
| 7986 | STREICHER_LSM1_TARGETS_DN                                           | 0.92 | 0.25 | 0 | 0 | 0 | not significant |
| 7987 | VALK_AML_CLUSTER_9                                                  | 0.92 | 0.25 | 0 | 0 | 0 | not significant |
| 7988 | CHR10Q25                                                            | 0.92 | 0.24 | 0 | 0 | 0 | not significant |
| 7989 | CHR8Q11                                                             | 0.92 | 0.24 | 0 | 0 | 0 | not significant |
| 7990 | GO_CARDIAC_MUSCLE_CELL_PROLIFERATION                                | 0.92 | 0.24 | 0 | 0 | 0 | not significant |
| 7991 | GO_CELLULAR_RESPONSE_TO_GAMMA_RADIATION                             | 0.92 | 0.24 | 0 | 0 | 0 | not significant |
| 7992 | GO_INNER_EAR_RECEPTOR_CELL_DEVELOPMENT                              | 0.92 | 0.24 | 0 | 0 | 0 | not significant |
| 7993 | GO_LAMELLAR_BODY                                                    | 0.92 | 0.24 | 0 | 0 | 0 | not significant |
| 7994 | GO_NEGATIVE_REGULATION_OF_ERAD_PATHWAY                              | 0.92 | 0.24 | 0 | 0 | 0 | not significant |
| 7995 | GO_NEGATIVE_REGULATION_OF_TRANSLATION_IN_RESPONSE_TO_STRESS         | 0.92 | 0.24 | 0 | 0 | 0 | not significant |
| 7996 | GO_NEGATIVE_REGULATION_OF_TYPE_2_IMMUNE_RESPONSE                    | 0.92 | 0.24 | 0 | 0 | 0 | not significant |
| 7997 | GO_NEPHRON_MORPHOGENESIS                                            | 0.92 | 0.24 | 0 | 0 | 0 | not significant |
| 7998 | GO_PORE_COMPLEX_ASSEMBLY                                            | 0.92 | 0.24 | 0 | 0 | 0 | not significant |
| 7999 | GO_POSITIVE_REGULATION_OF_ANTIGEN_RECEPTOR_MEDIATED_SIGNALING_PAT   | 0.92 | 0.24 | 0 | 0 | 0 | not significant |
| 8000 | GO_POSITIVE_REGULATION_OF_POTASSIUM_ION_TRANSPORT                   | 0.92 | 0.24 | 0 | 0 | 0 | not significant |
| 8001 | GO_POSITIVE_REGULATION_OF_PROTEIN_MATURATION                        | 0.92 | 0.24 | 0 | 0 | 0 | not significant |
| 8002 | GO_POSITIVE_REGULATION_OF_TRANSCRIPTION_FROM_RNA_POLYMERASE_II_PR   | 0.92 | 0.24 | 0 | 0 | 0 | not significant |
| 8003 | GO_PURINERGIC_RECEPTOR_ACTIVITY                                     | 0.92 | 0.24 | 0 | 0 | 0 | not significant |
| 8004 | HASLINGER_B_CELL_WITH_MUTATED_VH_GENES                              | 0.92 | 0.24 | 0 | 0 | 0 | not significant |
| 8005 | IRITANI_MAD1_TARGETS_DN                                             | 0.92 | 0.24 | 0 | 0 | 0 | not significant |
| 8006 | NGUYEN_NOTCH1_TARGETS_UP                                            | 0.92 | 0.24 | 0 | 0 | 0 | not significant |
| 8007 | REACTOME_CLASS_I_PEROXISOMAL_MEMBRANE_PROTEIN_IMPORT                | 0.92 | 0.24 | 0 | 0 | 0 | not significant |
| 8008 | REACTOME_NEF_MEDIATES_DOWN_MODULATION_OF_CELL_SURFACE_RECEPTOR      | 0.92 | 0.24 | 0 | 0 | 0 | not significant |
| 8009 | REACTOME_RIP_MEDIATED_NFKB_ACTIVATION_VIA_ZBP1                      | 0.92 | 0.24 | 0 | 0 | 0 | not significant |
| 8010 | WIKMAN_ASBESTOS_LUNG_CANCER_DN                                      | 0.92 | 0.24 | 0 | 0 | 0 | not significant |
| 8011 | ALCALAY_AML_BY_NPM1_LOCALIZATION_UP                                 | 0.92 | 0.23 | 0 | 0 | 0 | not significant |
| 8012 | GO_BRANCHING_MORPHOGENESIS_OF_AN_EPITHELIAL_TUBE                    | 0.92 | 0.23 | 0 | 0 | 0 | not significant |
| 8013 | GO_DYSTROGLYCAN_BINDING                                             | 0.92 | 0.23 | 0 | 0 | 0 | not significant |
| 8014 | GO_LEUKOCYTE_AGGREGATION                                            | 0.92 | 0.23 | 0 | 0 | 0 | not significant |
| 8015 | GO_LYMPHOCYTE_APOPTOTIC_PROCESS                                     | 0.92 | 0.23 | 0 | 0 | 0 | not significant |
| 8016 | GO_NECROTIC_CELL_DEATH                                              | 0.92 | 0.23 | 0 | 0 | 0 | not significant |
| 8017 | GO_NEGATIVE_REGULATION_OF_EPIDERMIS_DEVELOPMENT                     | 0.92 | 0.23 | 0 | 0 | 0 | not significant |
| 8018 | GO_NEGATIVE_REGULATION_OF_HEART_RATE                                | 0.92 | 0.23 | 0 | 0 | 0 | not significant |
| 8019 | GO_NEGATIVE_REGULATION_OF_PROTEIN_IMPORT_INTO_NUCLEUS               | 0.92 | 0.23 | 0 | 0 | 0 | not significant |
| 8020 | GO_NEGATIVE_REGULATION_OF_STRESS_ACTIVATED_PROTEIN_KINASE_SIGNALING | 0.92 | 0.23 | 0 | 0 | 0 | not significant |
| 8021 | GO_ORGANELLE_MEMBRANE_FUSION                                        | 0.92 | 0.23 | 0 | 0 | 0 | not significant |
| 8022 | GO_PHOSPHATIDYLINOSITOL_3_PHOSPHATE_BINDING                         | 0.92 | 0.23 | 0 | 0 | 0 | not significant |
| 8023 | GO_POSITIVE_REGULATION_OF_DEACETYLASE_ACTIVITY                      | 0.92 | 0.23 | 0 | 0 | 0 | not significant |
| 8024 | GO_POSITIVE_REGULATION_OF_DNA_REPAIR                                | 0.92 | 0.23 | 0 | 0 | 0 | not significant |
| 8025 | GO_PROTEIN_LOCALIZATION_TO_VACUOLE                                  | 0.92 | 0.23 | 0 | 0 | 0 | not significant |
| 8026 | GO_RNA_PHOSPHODIESTER_BOND_HYDROLYSIS_EXONUCLEOLYTIC                | 0.92 | 0.23 | 0 | 0 | 0 | not significant |
| 8027 | GO_VASCULAR_ENDOTHELIAL_GROWTH_FACTOR_RECEPTOR_SIGNALING_PATHW      | 0.92 | 0.23 | 0 | 0 | 0 | not significant |
| 8028 | GO_WNT_PROTEIN_BINDING                                              | 0.92 | 0.23 | 0 | 0 | 0 | not significant |
| 8029 | HEDVAT_ELF4_TARGETS_UP                                              | 0.92 | 0.23 | 0 | 0 | 0 | not significant |
| 8030 | HOOL_ST7_TARGETS_UP                                                 | 0.92 | 0.23 | 0 | 0 | 0 | not significant |
| 8031 | MAYBURD_RESPONSE_TO_L663536_DN                                      | 0.92 | 0.23 | 0 | 0 | 0 | not significant |
| 8032 | REACTOME_RAB_GERANYLGERANYLATION                                    | 0.92 | 0.23 | 0 | 0 | 0 | not significant |
| 8033 | WARTERS_IR_RESPONSE_5Gy                                             | 0.92 | 0.23 | 0 | 0 | 0 | not significant |
| 8034 | GO_CELL_CELL_ADHERENS_JUNCTION                                      | 0.92 | 0.22 | 0 | 0 | 0 | not significant |
| 8035 | GO_DEVELOPMENT_OF_PRIMARY_FEMALE_SEXUAL_CHARACTERISTICS             | 0.92 | 0.22 | 0 | 0 | 0 | not significant |
| 8036 | GO_LIPASE_INHIBITOR_ACTIVITY                                        | 0.92 | 0.22 | 0 | 0 | 0 | not significant |
| 8037 | GO_MEMBRANE_BIOGENESIS                                              | 0.92 | 0.22 | 0 | 0 | 0 | not significant |
| 8038 | GO_MYELOID_CELL_HOMEOSTASIS                                         | 0.92 | 0.22 | 0 | 0 | 0 | not significant |
| 8039 | GO_POSITIVE_REGULATION_OF_CHROMATIN_ORGANIZATION                    | 0.92 | 0.22 | 0 | 0 | 0 | not significant |
| 8040 | GO_REGULATION_OF_PROTEIN_LOCALIZATION_TO_CELL_SURFACE               | 0.92 | 0.22 | 0 | 0 | 0 | not significant |
| 8041 | GO_SARCOLEMMA                                                       | 0.92 | 0.22 | 0 | 0 | 0 | not significant |
| 8042 | CHR20Q13                                                            | 0.92 | 0.21 | 0 | 0 | 0 | not significant |
| 8043 | GO_CELL_JUNCTION_ASSEMBLY                                           | 0.92 | 0.21 | 0 | 0 | 0 | not significant |
| 8044 | GO_CONNECTIVE_TISSUE_DEVELOPMENT                                    | 0.92 | 0.21 | 0 | 0 | 0 | not significant |
| 8045 | GO_POSITIVE_REGULATION_OF_CELL_MORPHOGENESIS_INVOLVED_IN_DIFFEREN   | 0.92 | 0.21 | 0 | 0 | 0 | not significant |
| 8046 | REACTOME_G_ALPHA_I_SIGNALING_EVENTS                                 | 0.92 | 0.21 | 0 | 0 | 0 | not significant |
| 8047 | GO_NEURON_DEATH                                                     | 0.92 | 0.2  | 0 | 0 | 0 | not significant |
| 8048 | GO_REGULATION_OF_HORMONE_SECRETION                                  | 0.92 | 0.2  | 0 | 0 | 0 | not significant |
| 8049 | GO_VIRAL_GENOME_REPLICATION                                         | 0.92 | 0.2  | 0 | 0 | 0 | not significant |
| 8050 | GO_HOMEOSTASIS_OF_NUMBER_OF_CELLS                                   | 0.92 | 0.19 | 0 | 0 | 0 | not significant |
| 8051 | MARTINEZ_RB1_AND_TP53_TARGETS_DN                                    | 0.92 | 0.16 | 0 | 0 | 0 | not significant |
| 8052 | GO_GROWTH                                                           | 0.92 | 0.14 | 0 | 0 | 0 | not significant |
| 8053 | GO_NEGATIVE_REGULATION_OF_CATALYTIC_ACTIVITY                        | 0.92 | 0.14 | 0 | 0 | 0 | not significant |
| 8054 | GRAESSMANN_APOPTOSIS_BY_DOXORUBICIN_DN                              | 0.92 | 0.08 | 0 | 0 | 0 | not significant |

|      |                                                                    |      |      |   |   |   |                 |
|------|--------------------------------------------------------------------|------|------|---|---|---|-----------------|
| 8055 | GO_Glutamate_metabolic_process                                     | 0.93 | 0.27 | 0 | 0 | 0 | not significant |
| 8056 | GO_Negative_regulation_of_osteoblast_differentiation               | 0.93 | 0.27 | 0 | 0 | 0 | not significant |
| 8057 | GO_Regulation_of_sphingolipid_biosynthetic_process                 | 0.93 | 0.27 | 0 | 0 | 0 | not significant |
| 8058 | GO_Response_to_hydroperoxide                                       | 0.93 | 0.27 | 0 | 0 | 0 | not significant |
| 8059 | GO_T_cell_apoptotic_process                                        | 0.93 | 0.27 | 0 | 0 | 0 | not significant |
| 8060 | PID_Wnt_signaling_pathway                                          | 0.93 | 0.27 | 0 | 0 | 0 | not significant |
| 8061 | Reactome_LDL_clearance                                             | 0.93 | 0.27 | 0 | 0 | 0 | not significant |
| 8062 | BOGN_Treatment_related_myeloid_leukemia_up                         | 0.93 | 0.26 | 0 | 0 | 0 | not significant |
| 8063 | Caffarel_response_to_thc_dn                                        | 0.93 | 0.26 | 0 | 0 | 0 | not significant |
| 8064 | CHR12Q22                                                           | 0.93 | 0.26 | 0 | 0 | 0 | not significant |
| 8065 | GO_Alpha_amino_acid_catabolic_process                              | 0.93 | 0.26 | 0 | 0 | 0 | not significant |
| 8066 | GO_Positive_regulation_of_early_endosome_to_late_endosome_trans    | 0.93 | 0.26 | 0 | 0 | 0 | not significant |
| 8067 | GO_Response_to_fungus                                              | 0.93 | 0.26 | 0 | 0 | 0 | not significant |
| 8068 | HATADA_methylated_in_lung_cancer_dn                                | 0.93 | 0.26 | 0 | 0 | 0 | not significant |
| 8069 | Reactome_NCAM1_interactions                                        | 0.93 | 0.26 | 0 | 0 | 0 | not significant |
| 8070 | Reactome_nonsense_mediated_decay_nmd_independent_of_the_exon_jl    | 0.93 | 0.26 | 0 | 0 | 0 | not significant |
| 8071 | Reactome_signaling_by_notch1                                       | 0.93 | 0.26 | 0 | 0 | 0 | not significant |
| 8072 | Biocarta_nfkB_pathway                                              | 0.93 | 0.25 | 0 | 0 | 0 | not significant |
| 8073 | Biocarta_spry_pathway                                              | 0.93 | 0.25 | 0 | 0 | 0 | not significant |
| 8074 | FIGUEROA_AML_methylation_cluster_1_dn                              | 0.93 | 0.25 | 0 | 0 | 0 | not significant |
| 8075 | GO_Calcium_dependent_protein_binding                               | 0.93 | 0.25 | 0 | 0 | 0 | not significant |
| 8076 | GO_Exoribonuclease_activity                                        | 0.93 | 0.25 | 0 | 0 | 0 | not significant |
| 8077 | GO_Lymphangiogenesis                                               | 0.93 | 0.25 | 0 | 0 | 0 | not significant |
| 8078 | GO_Myotube_cell_development                                        | 0.93 | 0.25 | 0 | 0 | 0 | not significant |
| 8079 | GO_Negative_regulation_of_DNA_binding                              | 0.93 | 0.25 | 0 | 0 | 0 | not significant |
| 8080 | GO_Negative_regulation_of_endocytosis                              | 0.93 | 0.25 | 0 | 0 | 0 | not significant |
| 8081 | GO_Negative_regulation_of_muscle_contraction                       | 0.93 | 0.25 | 0 | 0 | 0 | not significant |
| 8082 | GO_Negative_regulation_of_programmed_necrotic_cell_death           | 0.93 | 0.25 | 0 | 0 | 0 | not significant |
| 8083 | GO_Ovarian_follicle_development                                    | 0.93 | 0.25 | 0 | 0 | 0 | not significant |
| 8084 | GO_Peptidyl_threonine_dephosphorylation                            | 0.93 | 0.25 | 0 | 0 | 0 | not significant |
| 8085 | GO_Phosphatidylinositol_3_4_bisphosphate_binding                   | 0.93 | 0.25 | 0 | 0 | 0 | not significant |
| 8086 | GO_Plasma_membrane_tubulation                                      | 0.93 | 0.25 | 0 | 0 | 0 | not significant |
| 8087 | GO_Positive_regulation_of_acute_inflammatory_response              | 0.93 | 0.25 | 0 | 0 | 0 | not significant |
| 8088 | GO_Positive_regulation_of_leukocyte_chemotaxis                     | 0.93 | 0.25 | 0 | 0 | 0 | not significant |
| 8089 | GO_Regulation_of_fatty_acid_metabolic_process                      | 0.93 | 0.25 | 0 | 0 | 0 | not significant |
| 8090 | GO_Regulation_of_lymphocyte_chemotaxis                             | 0.93 | 0.25 | 0 | 0 | 0 | not significant |
| 8091 | KEGG_sulfur_metabolism                                             | 0.93 | 0.25 | 0 | 0 | 0 | not significant |
| 8092 | LIU_TOPBP1_targets                                                 | 0.93 | 0.25 | 0 | 0 | 0 | not significant |
| 8093 | Reactome_activated_TAK1_mediates_P38_MAPK_activation               | 0.93 | 0.25 | 0 | 0 | 0 | not significant |
| 8094 | Reactome_lysine_catabolism                                         | 0.93 | 0.25 | 0 | 0 | 0 | not significant |
| 8095 | Reactome_P3K_events_in_ERBB2_signaling                             | 0.93 | 0.25 | 0 | 0 | 0 | not significant |
| 8096 | Reactome_TP53_regulates_transcription_of_cell_death_genes          | 0.93 | 0.25 | 0 | 0 | 0 | not significant |
| 8097 | BOQUEST_STEM_CELL_Cultured_vs_fresh_dn                             | 0.93 | 0.24 | 0 | 0 | 0 | not significant |
| 8098 | GARGALOVIC_Response_to_oxidized_phospholipids_grey_dn              | 0.93 | 0.24 | 0 | 0 | 0 | not significant |
| 8099 | GO_Kidney_epithelium_development                                   | 0.93 | 0.24 | 0 | 0 | 0 | not significant |
| 8100 | GO_Lymphocyte_homeostasis                                          | 0.93 | 0.24 | 0 | 0 | 0 | not significant |
| 8101 | GO_Microtubule_nucleation_by_interphase_microtubule_organizing_ce  | 0.93 | 0.24 | 0 | 0 | 0 | not significant |
| 8102 | GO_Muscle_alpha_actinin_binding                                    | 0.93 | 0.24 | 0 | 0 | 0 | not significant |
| 8103 | GO_Organophosphate_catabolic_process                               | 0.93 | 0.24 | 0 | 0 | 0 | not significant |
| 8104 | GO_Placenta_development                                            | 0.93 | 0.24 | 0 | 0 | 0 | not significant |
| 8105 | GO_Polyubiquitin_modification_dependent_protein_binding            | 0.93 | 0.24 | 0 | 0 | 0 | not significant |
| 8106 | GO_Positive_regulation_of_dendrite_morphogenesis                   | 0.93 | 0.24 | 0 | 0 | 0 | not significant |
| 8107 | GO_Regulation_of_autophagy_of_mitochondrion                        | 0.93 | 0.24 | 0 | 0 | 0 | not significant |
| 8108 | GO_Regulation_of_skeletal_muscle_tissue_development                | 0.93 | 0.24 | 0 | 0 | 0 | not significant |
| 8109 | GO_Signal_transduction_involved_in_regulation_of_gene_expression   | 0.93 | 0.24 | 0 | 0 | 0 | not significant |
| 8110 | GO_Translation_elongation_factor_activity                          | 0.93 | 0.24 | 0 | 0 | 0 | not significant |
| 8111 | KEGG_one_carbon_pool_by_folate                                     | 0.93 | 0.24 | 0 | 0 | 0 | not significant |
| 8112 | Reactome_metabolism_of_water_soluble_vitamins_and_cofactors        | 0.93 | 0.24 | 0 | 0 | 0 | not significant |
| 8113 | SEMBA_FHT_targets_up                                               | 0.93 | 0.24 | 0 | 0 | 0 | not significant |
| 8114 | DASU_IL6_signaling_up                                              | 0.93 | 0.23 | 0 | 0 | 0 | not significant |
| 8115 | GO_Glycolipid_transport                                            | 0.93 | 0.23 | 0 | 0 | 0 | not significant |
| 8116 | GO_Hydroxymethyl_formyl_and_related_transferase_activity           | 0.93 | 0.23 | 0 | 0 | 0 | not significant |
| 8117 | GO_Myeloid_leukocyte_differentiation                               | 0.93 | 0.23 | 0 | 0 | 0 | not significant |
| 8118 | GO_Regulation_of_membrane_permeability                             | 0.93 | 0.23 | 0 | 0 | 0 | not significant |
| 8119 | GO_Semi_lunar_valve_development                                    | 0.93 | 0.23 | 0 | 0 | 0 | not significant |
| 8120 | GO_Smooth_muscle_contraction                                       | 0.93 | 0.23 | 0 | 0 | 0 | not significant |
| 8121 | GO_Smoothened_signaling_pathway                                    | 0.93 | 0.23 | 0 | 0 | 0 | not significant |
| 8122 | GO_Synaptic_vesicle_cycle                                          | 0.93 | 0.23 | 0 | 0 | 0 | not significant |
| 8123 | GO_Transferase_activity_transferring_alkyl_or_aryl_other_than_me   | 0.93 | 0.23 | 0 | 0 | 0 | not significant |
| 8124 | ONDER_CDH1_targets_2_up                                            | 0.93 | 0.23 | 0 | 0 | 0 | not significant |
| 8125 | Reactome_pyrimidine_salvage                                        | 0.93 | 0.23 | 0 | 0 | 0 | not significant |
| 8126 | YAN_ESCAPE_FROM_ANOIKIS                                            | 0.93 | 0.23 | 0 | 0 | 0 | not significant |
| 8127 | BOQUEST_STEM_CELL_UP                                               | 0.93 | 0.22 | 0 | 0 | 0 | not significant |
| 8128 | GO_Cytosolic_small_ribosomal_subunit                               | 0.93 | 0.22 | 0 | 0 | 0 | not significant |
| 8129 | GO_Epsilon_DNA_polymerase_complex                                  | 0.93 | 0.22 | 0 | 0 | 0 | not significant |
| 8130 | GO_Germ_cell_development                                           | 0.93 | 0.22 | 0 | 0 | 0 | not significant |
| 8131 | GO_Positive_regulation_of_DNA_binding_transcription_factor_activit | 0.93 | 0.22 | 0 | 0 | 0 | not significant |
| 8132 | GO_Regulation_of_transporter_activity                              | 0.93 | 0.22 | 0 | 0 | 0 | not significant |
| 8133 | GO_Sensory_organ_morphogenesis                                     | 0.93 | 0.22 | 0 | 0 | 0 | not significant |
| 8134 | GO_Signal_release_from_synapse                                     | 0.93 | 0.22 | 0 | 0 | 0 | not significant |
| 8135 | HALLMARK_FATTY_ACID_METABOLISM                                     | 0.93 | 0.22 | 0 | 0 | 0 | not significant |
| 8136 | MARTORIATI_MDM4_TARGETS_FETAL_LIVER_UP                             | 0.93 | 0.22 | 0 | 0 | 0 | not significant |
| 8137 | AGUIRRE_PANCREATIC_CANCER_COPY_NUMBER_DN                           | 0.93 | 0.21 | 0 | 0 | 0 | not significant |
| 8138 | DARWICHE_PAPILLOMA_RISK_HIGH_DN                                    | 0.93 | 0.21 | 0 | 0 | 0 | not significant |
| 8139 | GO_COENZYME_METABOLIC_PROCESS                                      | 0.93 | 0.21 | 0 | 0 | 0 | not significant |
| 8140 | GO_VESICLE_LUMEN                                                   | 0.93 | 0.21 | 0 | 0 | 0 | not significant |
| 8141 | STARK_PREFRONTAL_CORTEX_22Q11_DELETION_UP                          | 0.93 | 0.21 | 0 | 0 | 0 | not significant |
| 8142 | GO_CELL_CELL_JUNCTION                                              | 0.93 | 0.2  | 0 | 0 | 0 | not significant |
| 8143 | GO_DEVELOPMENT_OF_PRIMARY_SEXUAL_CHARACTERISTICS                   | 0.93 | 0.2  | 0 | 0 | 0 | not significant |
| 8144 | Reactome_interferon_signaling                                      | 0.93 | 0.2  | 0 | 0 | 0 | not significant |
| 8145 | GO_Negative_regulation_of_intracellular_signal_transduction        | 0.93 | 0.17 | 0 | 0 | 0 | not significant |
| 8146 | GO_Organophosphate_biosynthetic_process                            | 0.93 | 0.17 | 0 | 0 | 0 | not significant |
| 8147 | GO_Activation_of_immune_response                                   | 0.93 | 0.16 | 0 | 0 | 0 | not significant |
| 8148 | WAKABAYASHI_ADIPOGENESIS_PPARG_BOUND_8D                            | 0.93 | 0.16 | 0 | 0 | 0 | not significant |
| 8149 | GO_FATTY_ACYL_COA_BINDING                                          | 0.93 | 0.16 | 0 | 0 | 0 | not significant |
| 8150 | GO_FOUR_WAY_JUNCTION_DNA_BINDING                                   | 0.94 | 0.28 | 0 | 0 | 0 | not significant |
| 8151 | GO_MICROVILLUS_MEMBRANE                                            | 0.94 | 0.28 | 0 | 0 | 0 | not significant |
| 8152 | GO_NEGATIVE_REGULATION_OF_B_CELL_ACTIVATION                        | 0.94 | 0.28 | 0 | 0 | 0 | not significant |
| 8153 | GO_POSITIVE_REGULATION_OF_PROTEIN_DEACETYLATION                    | 0.94 | 0.28 | 0 | 0 | 0 | not significant |
| 8154 | GO_TRANSFORMING_GROWTH_FACTOR_BETA_ACTIVATION                      | 0.94 | 0.28 | 0 | 0 | 0 | not significant |
| 8155 | Biocarta_AHSP_pathway                                              | 0.94 | 0.27 | 0 | 0 | 0 | not significant |
| 8156 | GO_Ciliary_transition_zone                                         | 0.94 | 0.27 | 0 | 0 | 0 | not significant |
| 8157 | GO_FATTY_ACID_HOMEOSTASIS                                          | 0.94 | 0.27 | 0 | 0 | 0 | not significant |
| 8158 | GO_GALACTOSE_CATABOLIC_PROCESS                                     | 0.94 | 0.27 | 0 | 0 | 0 | not significant |
| 8159 | GO_HOMOLOGOUS_CHROMOSOME_SEGREGATION                               | 0.94 | 0.27 | 0 | 0 | 0 | not significant |
| 8160 | GO_MYOSIN_COMPLEX                                                  | 0.94 | 0.27 | 0 | 0 | 0 | not significant |
| 8161 | GO_NEGATIVE_REGULATION_OF_CELL_CYCLE_G1_S_PHASE_TRANSITION         | 0.94 | 0.27 | 0 | 0 | 0 | not significant |
| 8162 | GO_NEGATIVE_REGULATION_OF_OXIDATIVE_STRESS_INDUCED_NEURON_DEATH    | 0.94 | 0.27 | 0 | 0 | 0 | not significant |
| 8163 | GO_NERVE_DEVELOPMENT                                               | 0.94 | 0.27 | 0 | 0 | 0 | not significant |

|      |                                                                    |      |      |   |   |   |                 |
|------|--------------------------------------------------------------------|------|------|---|---|---|-----------------|
| 8164 | GO POSITIVE REGULATION OF ESTABLISHMENT OF PROTEIN LOCALIZATION TC | 0.94 | 0.27 | 0 | 0 | 0 | not significant |
| 8165 | GO_POSITIVE_REGULATION_OF_LIPID_STORAGE                            | 0.94 | 0.27 | 0 | 0 | 0 | not significant |
| 8166 | GO_POSITIVE_REGULATION_OF_F38MAPK_CASCADE                          | 0.94 | 0.27 | 0 | 0 | 0 | not significant |
| 8167 | GO_POSITIVE_REGULATION_OF_T_HELPER_CELL_DIFFERENTIATION            | 0.94 | 0.27 | 0 | 0 | 0 | not significant |
| 8168 | GO_PROTEIN_PHOSPHATASE_2A_BINDING                                  | 0.94 | 0.27 | 0 | 0 | 0 | not significant |
| 8169 | GRAESSMANN_RESPONSE_TO_MC_AND_SERUM_DEPRIVATION_DN                 | 0.94 | 0.27 | 0 | 0 | 0 | not significant |
| 8170 | PID_WNT_NONCANONICAL_PATHWAY                                       | 0.94 | 0.27 | 0 | 0 | 0 | not significant |
| 8171 | REACTOME_NETRIN_1_SIGNALING                                        | 0.94 | 0.27 | 0 | 0 | 0 | not significant |
| 8172 | BILANGES_SERUM_SENSITIVE_VIA_TSC1                                  | 0.94 | 0.26 | 0 | 0 | 0 | not significant |
| 8173 | GO_CUL4B_RING_E3_UBIQUITIN_LIGASE_COMPLEX                          | 0.94 | 0.26 | 0 | 0 | 0 | not significant |
| 8174 | GO_HISTONE_DEUBIQUITINATION                                        | 0.94 | 0.26 | 0 | 0 | 0 | not significant |
| 8175 | GO_INTERCELLULAR_BRIDGE                                            | 0.94 | 0.26 | 0 | 0 | 0 | not significant |
| 8176 | GO_INVADOPODIUM                                                    | 0.94 | 0.26 | 0 | 0 | 0 | not significant |
| 8177 | GO_LYMPHOCYTE_COSTIMULATION                                        | 0.94 | 0.26 | 0 | 0 | 0 | not significant |
| 8178 | GO_MESONEPHRIC_TUBULE_MORPHOGENESIS                                | 0.94 | 0.26 | 0 | 0 | 0 | not significant |
| 8179 | GO_METHYLATED_HISTONE_BINDING                                      | 0.94 | 0.26 | 0 | 0 | 0 | not significant |
| 8180 | GO_MITOTIC_RECOMBINATION                                           | 0.94 | 0.26 | 0 | 0 | 0 | not significant |
| 8181 | GO_NEGATIVE_REGULATION_OF_TOLL_LIKE_RECEPTOR_SIGNALING_PATHWAY     | 0.94 | 0.26 | 0 | 0 | 0 | not significant |
| 8182 | GO_PARTURITION                                                     | 0.94 | 0.26 | 0 | 0 | 0 | not significant |
| 8183 | GO_POSITIVE_REGULATION_OF_PROTEIN_TARGETING_TO_MITOCHONDRION       | 0.94 | 0.26 | 0 | 0 | 0 | not significant |
| 8184 | GO_REGULATION_OF_CALCIIUM_ION_TRANSMEMBRANE_TRANSPORT              | 0.94 | 0.26 | 0 | 0 | 0 | not significant |
| 8185 | GO_REGULATION_OF_HEART_RATE_BY_CARDIAC_CONDUCTION                  | 0.94 | 0.26 | 0 | 0 | 0 | not significant |
| 8186 | GO_REGULATION_OF_MITOCHONDRIAL_MEMBRANE_PERMEABILITY_INVOLVED_IN_  | 0.94 | 0.26 | 0 | 0 | 0 | not significant |
| 8187 | GO_REGULATION_OF_PROTEIN_SUMOYLATION                               | 0.94 | 0.26 | 0 | 0 | 0 | not significant |
| 8188 | GO_REGULATION_OF_WOUND_HEALING                                     | 0.94 | 0.26 | 0 | 0 | 0 | not significant |
| 8189 | GO_SMOOTH_MUSCLE_CELL_DIFFERENTIATION                              | 0.94 | 0.26 | 0 | 0 | 0 | not significant |
| 8190 | JACKSON_DNMT1_TARGETS_UP                                           | 0.94 | 0.26 | 0 | 0 | 0 | not significant |
| 8191 | KAMMINGA_SENESCENCE                                                | 0.94 | 0.26 | 0 | 0 | 0 | not significant |
| 8192 | KYNG_ENVIRONMENTAL_STRESS_RESPONSE_NOT_BY_GAMMA_IN_WS              | 0.94 | 0.26 | 0 | 0 | 0 | not significant |
| 8193 | LEE_LIVER_CANCER_MYC_UP                                            | 0.94 | 0.26 | 0 | 0 | 0 | not significant |
| 8194 | MEISSNER_BRAIN_HCP_WITH_H3_UNMETHYLATED                            | 0.94 | 0.26 | 0 | 0 | 0 | not significant |
| 8195 | NOUZOVA_METHYLATED_IN_APL                                          | 0.94 | 0.26 | 0 | 0 | 0 | not significant |
| 8196 | PID_INTEGRIN_A4B1_PATHWAY                                          | 0.94 | 0.26 | 0 | 0 | 0 | not significant |
| 8197 | PID_INTEGRIN5_PATHWAY                                              | 0.94 | 0.26 | 0 | 0 | 0 | not significant |
| 8198 | REACTOME_GABA_SYNTHESIS_RELEASE_REUPTAKE_AND_DEGRADATION           | 0.94 | 0.26 | 0 | 0 | 0 | not significant |
| 8199 | RODRIGUES_THYROID_CARCINOMA_UP                                     | 0.94 | 0.26 | 0 | 0 | 0 | not significant |
| 8200 | YAP1_UP                                                            | 0.94 | 0.26 | 0 | 0 | 0 | not significant |
| 8201 | BIOCARTA_SODD_PATHWAY                                              | 0.94 | 0.25 | 0 | 0 | 0 | not significant |
| 8202 | CHR11Q25                                                           | 0.94 | 0.25 | 0 | 0 | 0 | not significant |
| 8203 | CHR17P11                                                           | 0.94 | 0.25 | 0 | 0 | 0 | not significant |
| 8204 | CROONQUIST_STROMAL_STIMULATION_DN                                  | 0.94 | 0.25 | 0 | 0 | 0 | not significant |
| 8205 | GO_ALDEHYDE_LYASE_ACTIVITY                                         | 0.94 | 0.25 | 0 | 0 | 0 | not significant |
| 8206 | GO_LAMELLIPODIUM_MEMBRANE                                          | 0.94 | 0.25 | 0 | 0 | 0 | not significant |
| 8207 | GO_MALE_SEX_DIFFERENTIATION                                        | 0.94 | 0.25 | 0 | 0 | 0 | not significant |
| 8208 | GO_NEGATIVE_REGULATION_OF_INTRACELLULAR_TRANSPORT                  | 0.94 | 0.25 | 0 | 0 | 0 | not significant |
| 8209 | GO_NEGATIVE_REGULATION_OF_PROTEIN_AUTOPHOSPHORYLATION              | 0.94 | 0.25 | 0 | 0 | 0 | not significant |
| 8210 | GO_NOTCH_BINDING                                                   | 0.94 | 0.25 | 0 | 0 | 0 | not significant |
| 8211 | GO_POSITIVE_REGULATION_OF_LYMPHOCYTE_CHEMOTAXIS                    | 0.94 | 0.25 | 0 | 0 | 0 | not significant |
| 8212 | GO_REGULATION_OF_SECONDARY_METABOLIC_PROCESS                       | 0.94 | 0.25 | 0 | 0 | 0 | not significant |
| 8213 | GO_REGULATION_OF_T_HELPER_CELL_DIFFERENTIATION                     | 0.94 | 0.25 | 0 | 0 | 0 | not significant |
| 8214 | KAUFFMANN_MELANOMA_RELAPSE_UP                                      | 0.94 | 0.25 | 0 | 0 | 0 | not significant |
| 8215 | RAY_TUMORIGENESIS_BY_ERBB2_CDC25A_UP                               | 0.94 | 0.25 | 0 | 0 | 0 | not significant |
| 8216 | ROSS_AML_WITH_PML_RARA_FUSION                                      | 0.94 | 0.25 | 0 | 0 | 0 | not significant |
| 8217 | SIG_PIP3_SIGNALING_IN_B_LYMPHOCYTES                                | 0.94 | 0.25 | 0 | 0 | 0 | not significant |
| 8218 | GO_HIGH_VOLTAGE_GATED_CALCIIUM_CHANNEL_ACTIVITY                    | 0.94 | 0.24 | 0 | 0 | 0 | not significant |
| 8219 | GO_NEGATIVE_REGULATION_OF_SUPRAMOLECULAR_FIBER_ORGANIZATION        | 0.94 | 0.24 | 0 | 0 | 0 | not significant |
| 8220 | GO_REGULATION_OF_EPIDERMAL_GROWTH_FACTOR_ACTIVATED_RECEPTOR_AC     | 0.94 | 0.24 | 0 | 0 | 0 | not significant |
| 8221 | GO_REGULATION_OF_RETINOIC_ACID_RECEPTOR_SIGNALING_PATHWAY          | 0.94 | 0.24 | 0 | 0 | 0 | not significant |
| 8222 | GO_TORC2_COMPLEX                                                   | 0.94 | 0.24 | 0 | 0 | 0 | not significant |
| 8223 | KEGG_ERBB_SIGNALING_PATHWAY                                        | 0.94 | 0.24 | 0 | 0 | 0 | not significant |
| 8224 | REACTOME_DEX_H_BOX_HELICASES_ACTIVATE_TYPE_I_IFN_AND_INFLAMMATORY  | 0.94 | 0.24 | 0 | 0 | 0 | not significant |
| 8225 | AMUNDSON_POOR_SURVIVAL_AFTER_GAMMA_RADIATION_8G                    | 0.94 | 0.23 | 0 | 0 | 0 | not significant |
| 8226 | GO_HORMONE_TRANSPORT                                               | 0.94 | 0.23 | 0 | 0 | 0 | not significant |
| 8227 | GO_LIGASE_ACTIVITY_FORMING_PHOSPHORIC_ESTER_BONDS                  | 0.94 | 0.23 | 0 | 0 | 0 | not significant |
| 8228 | GO_POSITIVE_REGULATION_OF_STRIATED_MUSCLE_CELL_APOPTOTIC_PROCESS   | 0.94 | 0.23 | 0 | 0 | 0 | not significant |
| 8229 | POOLA_INVASIVE_BREAST_CANCER_DN                                    | 0.94 | 0.23 | 0 | 0 | 0 | not significant |
| 8230 | PUIFFE_INVASION_INHIBITED_BY_ASCITES_DN                            | 0.94 | 0.23 | 0 | 0 | 0 | not significant |
| 8231 | GO_NUCLEAR_MEMBRANE                                                | 0.94 | 0.21 | 0 | 0 | 0 | not significant |
| 8232 | DEURIG_T_CELL_PROLYMPHOCYTIC_LEUKEMIA_UP                           | 0.94 | 0.2  | 0 | 0 | 0 | not significant |
| 8233 | GO_DEVELOPMENTAL_PROCESS_INVOLVED_IN_REPRODUCTION                  | 0.94 | 0.2  | 0 | 0 | 0 | not significant |
| 8234 | GO_REGULATION_OF_VESICLE_MEDIATED_TRANSPORT                        | 0.94 | 0.2  | 0 | 0 | 0 | not significant |
| 8235 | GO_DEVELOPMENTAL_GROWTH                                            | 0.94 | 0.19 | 0 | 0 | 0 | not significant |
| 8236 | NUYTEN_EZH2_TARGETS_UP                                             | 0.94 | 0.16 | 0 | 0 | 0 | not significant |
| 8237 | GO_CELLULAR_RESPONSE_TO_DNA_DAMAGE_STIMULUS                        | 0.94 | 0.15 | 0 | 0 | 0 | not significant |
| 8238 | GO_DNA_BINDING_TRANSCRIPTION_FACTOR_ACTIVITY                       | 0.94 | 0.14 | 0 | 0 | 0 | not significant |
| 8239 | GO_NEGATIVE_REGULATION_OF_BIOSYNTHETIC_PROCESS                     | 0.94 | 0.13 | 0 | 0 | 0 | not significant |
| 8240 | GO_DIGESTIVE_SYSTEM_PROCESS                                        | 0.95 | 0.3  | 0 | 0 | 0 | not significant |
| 8241 | AMIT_EGF_RESPONSE_20_MCF10A                                        | 0.95 | 0.29 | 0 | 0 | 0 | not significant |
| 8242 | GO_PROGRAMMED_NECROTIC_CELL_DEATH                                  | 0.95 | 0.29 | 0 | 0 | 0 | not significant |
| 8243 | BIOCARTA_MAPK_PATHWAY                                              | 0.95 | 0.28 | 0 | 0 | 0 | not significant |
| 8244 | CHIANG_LIVER_CANCER_SUBCLASS_UNANNOTATED_UP                        | 0.95 | 0.28 | 0 | 0 | 0 | not significant |
| 8245 | CHR6Q27                                                            | 0.95 | 0.28 | 0 | 0 | 0 | not significant |
| 8246 | DER_IFN_GAMMA_RESPONSE_DN                                          | 0.95 | 0.28 | 0 | 0 | 0 | not significant |
| 8247 | GO_BONE_RESORPTION                                                 | 0.95 | 0.28 | 0 | 0 | 0 | not significant |
| 8248 | GO_CILIARY_MEMBRANE                                                | 0.95 | 0.28 | 0 | 0 | 0 | not significant |
| 8249 | GO_COFACTOR_CATABOLIC_PROCESS                                      | 0.95 | 0.28 | 0 | 0 | 0 | not significant |
| 8250 | GO_ENDOCRINE_PANCREAS_DEVELOPMENT                                  | 0.95 | 0.28 | 0 | 0 | 0 | not significant |
| 8251 | GO_MYELOID_CELL_APOPTOTIC_PROCESS                                  | 0.95 | 0.28 | 0 | 0 | 0 | not significant |
| 8252 | GO_POSITIVE_REGULATION_OF_ALPHA_BETA_T_CELL_DIFFERENTIATION        | 0.95 | 0.28 | 0 | 0 | 0 | not significant |
| 8253 | GO_POSITIVE_REGULATION_OF_PROTEIN_KINASE_B_SIGNALING               | 0.95 | 0.28 | 0 | 0 | 0 | not significant |
| 8254 | GO_REGULATION_OF_T_CELL_APOPTOTIC_PROCESS                          | 0.95 | 0.28 | 0 | 0 | 0 | not significant |
| 8255 | GO_REGULATION_OF_TYPE_2_IMMUNE_RESPONSE                            | 0.95 | 0.28 | 0 | 0 | 0 | not significant |
| 8256 | GO_RESPONSE_TO_ISCHEMIA                                            | 0.95 | 0.28 | 0 | 0 | 0 | not significant |
| 8257 | KYNG_DNA_DAMAGE_BY_LV                                              | 0.95 | 0.28 | 0 | 0 | 0 | not significant |
| 8258 | PID_ARF6_PATHWAY                                                   | 0.95 | 0.28 | 0 | 0 | 0 | not significant |
| 8259 | REACTOME_O_LINKED_GLYCOSYLATION                                    | 0.95 | 0.28 | 0 | 0 | 0 | not significant |
| 8260 | REACTOME_SULFUR_AMINO_ACID_METABOLISM                              | 0.95 | 0.28 | 0 | 0 | 0 | not significant |
| 8261 | SARTIPY_BLUNTED_BY_INSULIN_RESISTANCE_DN                           | 0.95 | 0.28 | 0 | 0 | 0 | not significant |
| 8262 | BCAT_GDS748_UP                                                     | 0.95 | 0.27 | 0 | 0 | 0 | not significant |
| 8263 | CHR18Q23                                                           | 0.95 | 0.27 | 0 | 0 | 0 | not significant |
| 8264 | DACOSTA_LOW_DOSE_UV_RESPONSE_VIA_ERCC3_XPCS_UP                     | 0.95 | 0.27 | 0 | 0 | 0 | not significant |
| 8265 | GO_ACTIN_FILAMENT_SEVERING                                         | 0.95 | 0.27 | 0 | 0 | 0 | not significant |
| 8266 | GO_AXON_EXTENSION                                                  | 0.95 | 0.27 | 0 | 0 | 0 | not significant |
| 8267 | GO_BRANCH_ELONGATION_OF_AN_EPITHELIUM                              | 0.95 | 0.27 | 0 | 0 | 0 | not significant |
| 8268 | GO_HIPPO_SIGNALING                                                 | 0.95 | 0.27 | 0 | 0 | 0 | not significant |
| 8269 | GO_MAP_KINASE_SCAFFOLD_ACTIVITY                                    | 0.95 | 0.27 | 0 | 0 | 0 | not significant |
| 8270 | GO_MITOCHONDRIAL_OUTER_MEMBRANE_PERMEABILIZATION                   | 0.95 | 0.27 | 0 | 0 | 0 | not significant |
| 8271 | GO_NEGATIVE_REGULATION_OF_CELLULAR_RESPONSE_TO_GROWTH_FACTOR_5     | 0.95 | 0.27 | 0 | 0 | 0 | not significant |
| 8272 | GO_NEGATIVE_REGULATION_OF_EXTRINSIC_APOPTOTIC_SIGNALING_PATHWAY    | 0.95 | 0.27 | 0 | 0 | 0 | not significant |



|      |                                                                    |      |      |   |   |   |                 |
|------|--------------------------------------------------------------------|------|------|---|---|---|-----------------|
| 8273 | GO_NEGATIVE_REGULATION_OF_RESPONSE_TO_EXTRACELLULAR_STIMULUS       | 0.95 | 0.27 | 0 | 0 | 0 | not significant |
| 8274 | GO_OVULATION                                                       | 0.95 | 0.27 | 0 | 0 | 0 | not significant |
| 8275 | GO_OXIDOREDUCTASE_ACTIVITY_ACTING_ON_A_SULFUR_GROUP_OF_DONORS_C    | 0.95 | 0.27 | 0 | 0 | 0 | not significant |
| 8276 | GO_POSITIVE_REGULATION_OF_VASCULAR_ENDOTHELIAL_GROWTH_FACTOR_RE    | 0.95 | 0.27 | 0 | 0 | 0 | not significant |
| 8277 | GO_REGULATION_OF_PEPTIDYL_LYSINE_ACETYLYATION                      | 0.95 | 0.27 | 0 | 0 | 0 | not significant |
| 8278 | GO_TOXIN_METABOLIC_PROCESS                                         | 0.95 | 0.27 | 0 | 0 | 0 | not significant |
| 8279 | GO_TRANSFERASE_ACTIVITY_TRANSFERRING_NITROGENOUS_GROUPS            | 0.95 | 0.27 | 0 | 0 | 0 | not significant |
| 8280 | HOEGERKORP_CD44_TARGETS_TEMPORAL_DN                                | 0.95 | 0.27 | 0 | 0 | 0 | not significant |
| 8281 | IL15_UP_V1_UP                                                      | 0.95 | 0.27 | 0 | 0 | 0 | not significant |
| 8282 | PID_P53_DOWNSTREAM_PATHWAY                                         | 0.95 | 0.27 | 0 | 0 | 0 | not significant |
| 8283 | REACTOME_TNFS_BIND_THEIR_PHYSIOLOGICAL_RECEPTORS                   | 0.95 | 0.27 | 0 | 0 | 0 | not significant |
| 8284 | SESTO_RESPONSE_TO_UV_C8                                            | 0.95 | 0.27 | 0 | 0 | 0 | not significant |
| 8285 | GO_ANKYRIN_BINDING                                                 | 0.95 | 0.26 | 0 | 0 | 0 | not significant |
| 8286 | GO_AUTOLYSOSOME                                                    | 0.95 | 0.26 | 0 | 0 | 0 | not significant |
| 8287 | GO_CARBOHYDRATE_TRANSMEMBRANE_TRANSPORTER_ACTIVITY                 | 0.95 | 0.26 | 0 | 0 | 0 | not significant |
| 8288 | GO_CARBOHYDRATE_TRANSPORT                                          | 0.95 | 0.26 | 0 | 0 | 0 | not significant |
| 8289 | GO_CELL_MATURATION                                                 | 0.95 | 0.26 | 0 | 0 | 0 | not significant |
| 8290 | GO_CELLULAR_RESPONSE_TO_X_RAY                                      | 0.95 | 0.26 | 0 | 0 | 0 | not significant |
| 8291 | GO_DISTAL_AXON                                                     | 0.95 | 0.26 | 0 | 0 | 0 | not significant |
| 8292 | GO_G_QUADRUPLEX_RNA_BINDING                                        | 0.95 | 0.26 | 0 | 0 | 0 | not significant |
| 8293 | GO_GLYCEROLIPID_BIOSYNTHETIC_PROCESS                               | 0.95 | 0.26 | 0 | 0 | 0 | not significant |
| 8294 | GO_INTRA_S_DNA_DAMAGE_CHECKPOINT                                   | 0.95 | 0.26 | 0 | 0 | 0 | not significant |
| 8295 | GO_NEGATIVE_REGULATION_OF_INTRACELLULAR_PROTEIN_TRANSPORT          | 0.95 | 0.26 | 0 | 0 | 0 | not significant |
| 8296 | GO_NEGATIVE_REGULATION_OF_RESPONSE_TO_OXIDATIVE_STRESS             | 0.95 | 0.26 | 0 | 0 | 0 | not significant |
| 8297 | GO_PERK_MEDIATED_UNFOLDED_PROTEIN_RESPONSE                         | 0.95 | 0.26 | 0 | 0 | 0 | not significant |
| 8298 | GO_POSITIVE_REGULATION_OF_COLD_INDUCED_THERMOGENESIS               | 0.95 | 0.26 | 0 | 0 | 0 | not significant |
| 8299 | GO_POSITIVE_REGULATION_OF_PROTEIN_ACETYLYATION                     | 0.95 | 0.26 | 0 | 0 | 0 | not significant |
| 8300 | GO_PROTEIN_AUTOPROCESSING                                          | 0.95 | 0.26 | 0 | 0 | 0 | not significant |
| 8301 | GO_PROTON_TRANSMEMBRANE_TRANSPORT                                  | 0.95 | 0.26 | 0 | 0 | 0 | not significant |
| 8302 | GO_PROTON_TRANSPORTING_V_TYPE_ATPASE_COMPLEX                       | 0.95 | 0.26 | 0 | 0 | 0 | not significant |
| 8303 | GO_REGULATION_OF_DENDRITE_MORPHOGENESIS                            | 0.95 | 0.26 | 0 | 0 | 0 | not significant |
| 8304 | GO_RNA_POLYMERASE_II_C_TERMINAL_DOMAIN_BINDING                     | 0.95 | 0.26 | 0 | 0 | 0 | not significant |
| 8305 | GO_SMOOTH_ENDOPLASMIC_RETICULUM                                    | 0.95 | 0.26 | 0 | 0 | 0 | not significant |
| 8306 | GO_VERY_LONG_CHAIN_FATTY_ACID_METABOLIC_PROCESS                    | 0.95 | 0.26 | 0 | 0 | 0 | not significant |
| 8307 | HERNANDEZ_MITOTIC_ARREST_BY_DOCETAXEL_2_UP                         | 0.95 | 0.26 | 0 | 0 | 0 | not significant |
| 8308 | MELLMAN_TUT1_TARGETS_DN                                            | 0.95 | 0.26 | 0 | 0 | 0 | not significant |
| 8309 | MISHRA_CARCIOMA_ASSOCIATED_FIBROBLAST_DN                           | 0.95 | 0.26 | 0 | 0 | 0 | not significant |
| 8310 | NIKOLSKY_BREAST_CANCER_11Q12_Q14_AMPLICON                          | 0.95 | 0.26 | 0 | 0 | 0 | not significant |
| 8311 | PID_PDGFBR_PATHWAY                                                 | 0.95 | 0.26 | 0 | 0 | 0 | not significant |
| 8312 | REACTOME ASPARTATE AND ASPARAGINE METABOLISM                       | 0.95 | 0.26 | 0 | 0 | 0 | not significant |
| 8313 | WOOD_EBV_EBNA1_TARGETS_UP                                          | 0.95 | 0.26 | 0 | 0 | 0 | not significant |
| 8314 | ZHANG_GATA6_TARGETS_UP                                             | 0.95 | 0.26 | 0 | 0 | 0 | not significant |
| 8315 | GAL_LEUKEMIC_STEM_CELL_UP                                          | 0.95 | 0.25 | 0 | 0 | 0 | not significant |
| 8316 | GAUSSMANN_MLL_AF4_FUSION_TARGETS_C_UP                              | 0.95 | 0.25 | 0 | 0 | 0 | not significant |
| 8317 | GO_CELLULAR_RESPONSE_TO_RADIATION                                  | 0.95 | 0.25 | 0 | 0 | 0 | not significant |
| 8318 | GO_CYTOKINE_RECEPTOR_BINDING                                       | 0.95 | 0.25 | 0 | 0 | 0 | not significant |
| 8319 | GO_DEVELOPMENTAL_GROWTH_INVOLVED_IN_MORPHOGENESIS                  | 0.95 | 0.25 | 0 | 0 | 0 | not significant |
| 8320 | GO_GPI_ANCHOR_TRANSMIDASE_ACTIVITY                                 | 0.95 | 0.25 | 0 | 0 | 0 | not significant |
| 8321 | GO_HEART_MORPHOGENESIS                                             | 0.95 | 0.25 | 0 | 0 | 0 | not significant |
| 8322 | GO_LYSINE_CATABOLIC_PROCESS                                        | 0.95 | 0.25 | 0 | 0 | 0 | not significant |
| 8323 | GO_NEGATIVE_REGULATION_OF_VASOCONSTRICTION                         | 0.95 | 0.25 | 0 | 0 | 0 | not significant |
| 8324 | GO_RECEPTOR_ANTAGONIST_ACTIVITY                                    | 0.95 | 0.25 | 0 | 0 | 0 | not significant |
| 8325 | GO_TRIGLYCERIDE_LIPASE_ACTIVITY                                    | 0.95 | 0.25 | 0 | 0 | 0 | not significant |
| 8326 | HALLMARK_COMPLEMENT                                                | 0.95 | 0.25 | 0 | 0 | 0 | not significant |
| 8327 | LIM_MAMMARY_STEM_CELL_UP                                           | 0.95 | 0.25 | 0 | 0 | 0 | not significant |
| 8328 | PETRETTO_BLOOD_PRESSURE_DN                                         | 0.95 | 0.25 | 0 | 0 | 0 | not significant |
| 8329 | REACTOME_SIGNALING_BY_NOTCH2                                       | 0.95 | 0.25 | 0 | 0 | 0 | not significant |
| 8330 | GO_PEPTIDYL_LYSINE_METHYLATION                                     | 0.95 | 0.24 | 0 | 0 | 0 | not significant |
| 8331 | GO_REGULATION_OF_CELL_MORPHOGENESIS_INVOLVED_IN_DIFFERENTIATION    | 0.95 | 0.24 | 0 | 0 | 0 | not significant |
| 8332 | REN_ALVEOLAR_RHABDOMYOSARCOMA_DN                                   | 0.95 | 0.24 | 0 | 0 | 0 | not significant |
| 8333 | SWEET_LUNG_CANCER_KRAS_DN                                          | 0.95 | 0.24 | 0 | 0 | 0 | not significant |
| 8334 | GO_REGULATION_OF_CELL_MORPHOGENESIS                                | 0.95 | 0.23 | 0 | 0 | 0 | not significant |
| 8335 | BONOME_OVARIAN_CANCER_SURVIVAL_SUBOPTIMAL_DEBULKING                | 0.95 | 0.21 | 0 | 0 | 0 | not significant |
| 8336 | GO_HYDROLASE_ACTIVITY_ACTING_ON_ESTER_BONDS                        | 0.95 | 0.2  | 0 | 0 | 0 | not significant |
| 8337 | GO_TRANSCRIPTION_FACTOR_BINDING                                    | 0.95 | 0.2  | 0 | 0 | 0 | not significant |
| 8338 | GO_CELL_JUNCTION                                                   | 0.95 | 0.19 | 0 | 0 | 0 | not significant |
| 8339 | BOYLAN_MULTIPLE_MYELOMA_PCA3_DN                                    | 0.96 | 0.31 | 0 | 0 | 0 | not significant |
| 8340 | GO_CYTOPLASMIC_PATTERN_RECOGNITION_RECEPTOR_SIGNALING_PATHWAY_IN   | 0.96 | 0.31 | 0 | 0 | 0 | not significant |
| 8341 | GO_PEPTIDYL_L_CYSSTEINE_S_PALMITOYLATION                           | 0.96 | 0.3  | 0 | 0 | 0 | not significant |
| 8342 | GO_POSITIVE_REGULATION_OF_PROTEIN_TARGETING_TO_MEMBRANE            | 0.96 | 0.3  | 0 | 0 | 0 | not significant |
| 8343 | GO_TRANSCRIPTION_COREPRESSOR_BINDING                               | 0.96 | 0.3  | 0 | 0 | 0 | not significant |
| 8344 | GO_TRANSLATION_REPRESSOR_ACTIVITY                                  | 0.96 | 0.3  | 0 | 0 | 0 | not significant |
| 8345 | KEGG_VALINE_LEUCINE_AND_ISOLEUCINE_DEGRADATION                     | 0.96 | 0.3  | 0 | 0 | 0 | not significant |
| 8346 | PID_P13K_PL3C_TRK_PATHWAY                                          | 0.96 | 0.3  | 0 | 0 | 0 | not significant |
| 8347 | ZHENG_GLIOMASTOMA_PLASTICITY_DN                                    | 0.96 | 0.3  | 0 | 0 | 0 | not significant |
| 8348 | DER_IFN_BETA_RESPONSE_UP                                           | 0.96 | 0.29 | 0 | 0 | 0 | not significant |
| 8349 | GO_ARMADILLO_REPEAT_DOMAIN_BINDING                                 | 0.96 | 0.29 | 0 | 0 | 0 | not significant |
| 8350 | GO_ESTABLISHMENT_OF_PROTEIN_LOCALIZATION_TO_VACUOLE                | 0.96 | 0.29 | 0 | 0 | 0 | not significant |
| 8351 | GO_G1_DNA_DAMAGE_CHECKPOINT                                        | 0.96 | 0.29 | 0 | 0 | 0 | not significant |
| 8352 | GO_GOLGI_TO_ENDOSOME_TRANSPORT                                     | 0.96 | 0.29 | 0 | 0 | 0 | not significant |
| 8353 | GO_KETONE_BIOSYNTHETIC_PROCESS                                     | 0.96 | 0.29 | 0 | 0 | 0 | not significant |
| 8354 | GO_MICROVILLUS                                                     | 0.96 | 0.29 | 0 | 0 | 0 | not significant |
| 8355 | GO_NEGATIVE_REGULATION_OF_GTPASE_ACTIVITY                          | 0.96 | 0.29 | 0 | 0 | 0 | not significant |
| 8356 | GO_NEGATIVE_REGULATION_OF_TYPE_I_INTERFERON_MEDIATED_SIGNALING_PAT | 0.96 | 0.29 | 0 | 0 | 0 | not significant |
| 8357 | GO_REGULATION_OF_CELLULAR_EXTRAVASATION                            | 0.96 | 0.29 | 0 | 0 | 0 | not significant |
| 8358 | GO_REGULATION_OF_DNA_REPLICATION                                   | 0.96 | 0.29 | 0 | 0 | 0 | not significant |
| 8359 | KEGG_AXON_GUIDANCE                                                 | 0.96 | 0.29 | 0 | 0 | 0 | not significant |
| 8360 | LI_WILMS_TUMOR_VS_FETAL_KIDNEY_2_DN                                | 0.96 | 0.29 | 0 | 0 | 0 | not significant |
| 8361 | RUAN_RESPONSE_TO_TNF_DN                                            | 0.96 | 0.29 | 0 | 0 | 0 | not significant |
| 8362 | SCHUETZ_BREAST_CANCER_DUCTAL_INVASIVE_DN                           | 0.96 | 0.29 | 0 | 0 | 0 | not significant |
| 8363 | ZHAN_MULTIPLE_MYELOMA_CD1_DN                                       | 0.96 | 0.29 | 0 | 0 | 0 | not significant |
| 8364 | BANDRES_RESPONSE_TO_CARMUSTIN_MGMT_48HR_DN                         | 0.96 | 0.28 | 0 | 0 | 0 | not significant |
| 8365 | BROWNE_HCMV_INFECTION_2HR_DN                                       | 0.96 | 0.28 | 0 | 0 | 0 | not significant |
| 8366 | CHEOK_RESPONSE_TO_MERCAPTOPYRINE_DN                                | 0.96 | 0.28 | 0 | 0 | 0 | not significant |
| 8367 | GAVIN_FOXP3_TARGETS_CLUSTER_P4                                     | 0.96 | 0.28 | 0 | 0 | 0 | not significant |
| 8368 | GO_ATPASE_ACTIVITY_COUPLED_TO_TRANSMEMBRANE_MOVEMENT_OF_IONS_RC    | 0.96 | 0.28 | 0 | 0 | 0 | not significant |
| 8369 | GO_EPIDERMIS_MORPHOGENESIS                                         | 0.96 | 0.28 | 0 | 0 | 0 | not significant |
| 8370 | GO_HOPS_COMPLEX                                                    | 0.96 | 0.28 | 0 | 0 | 0 | not significant |
| 8371 | GO_INFLAMMATORY_CELL_APOPTOTIC_PROCESS                             | 0.96 | 0.28 | 0 | 0 | 0 | not significant |
| 8372 | GO_INTRACELLULAR_STEROL_TRANSPORT                                  | 0.96 | 0.28 | 0 | 0 | 0 | not significant |
| 8373 | GO_MAGNESIUM_DEPENDENT_PROTEIN_SERINE_THREONINE_PHOSPHATASE_ACTI   | 0.96 | 0.28 | 0 | 0 | 0 | not significant |
| 8374 | GO_MONOSACCHARIDE_BINDING                                          | 0.96 | 0.28 | 0 | 0 | 0 | not significant |
| 8375 | GO_NEGATIVE_REGULATION_OF_AXONOGENESIS                             | 0.96 | 0.28 | 0 | 0 | 0 | not significant |
| 8376 | GO_NEGATIVE_REGULATION_OF_DNA_DEPENDENT_DNA_REPLICATION            | 0.96 | 0.28 | 0 | 0 | 0 | not significant |
| 8377 | GO_NEGATIVE_REGULATION_OF_T_HELPER_CELL_DIFFERENTIATION            | 0.96 | 0.28 | 0 | 0 | 0 | not significant |
| 8378 | GO_NUCLEOSIDE_CATABOLIC_PROCESS                                    | 0.96 | 0.28 | 0 | 0 | 0 | not significant |
| 8379 | GO_PHAGOSOME_ACIDIFICATION                                         | 0.96 | 0.28 | 0 | 0 | 0 | not significant |
| 8380 | GO_PHOSPHATIDYLINOSITOL_BIOSYNTHETIC_PROCESS                       | 0.96 | 0.28 | 0 | 0 | 0 | not significant |
| 8381 | GO_POSITIVE_REGULATION_OF_PHOSPHATIDYLINOSITOL_3_KINASE_SIGNALING  | 0.96 | 0.28 | 0 | 0 | 0 | not significant |

|      |                                                                     |      |      |   |   |   |                 |
|------|---------------------------------------------------------------------|------|------|---|---|---|-----------------|
| 8382 | GO REGULATION OF AUTOPHAGY OF MITOCHONDRION IN RESPONSE TO MITO     | 0.96 | 0.28 | 0 | 0 | 0 | not significant |
| 8383 | GO_REGULATION_OF_RESPONSE_TO_WOUNDING                               | 0.96 | 0.28 | 0 | 0 | 0 | not significant |
| 8384 | HOFMANN_MYELODYSPLASTIC_SYNDROM_HIGH_RISK_DN                        | 0.96 | 0.28 | 0 | 0 | 0 | not significant |
| 8385 | KEGG_RIG_I_LIKE_RECEPTOR_SIGNALING_PATHWAY                          | 0.96 | 0.28 | 0 | 0 | 0 | not significant |
| 8386 | KESHELAVA_MULTIPLE_DRUG_RESISTANCE                                  | 0.96 | 0.28 | 0 | 0 | 0 | not significant |
| 8387 | MARSON_FOXP3_TARGETS_STIMULATED_UP                                  | 0.96 | 0.28 | 0 | 0 | 0 | not significant |
| 8388 | REACTOME_COMPETING_ENDOGENOUS_RNAS_CERNAS_REGULATE_PTEEN_TRANS      | 0.96 | 0.28 | 0 | 0 | 0 | not significant |
| 8389 | REACTOME_PROCESSING_OF_DNA_DOUBLE_STRAND_BREAK_ENDS                 | 0.96 | 0.28 | 0 | 0 | 0 | not significant |
| 8390 | STAEGE_EWING_FAMILY_TUMOR                                           | 0.96 | 0.28 | 0 | 0 | 0 | not significant |
| 8391 | WENG_POR_TARGETS_LIVER_DN                                           | 0.96 | 0.28 | 0 | 0 | 0 | not significant |
| 8392 | CHRYQ11                                                             | 0.96 | 0.27 | 0 | 0 | 0 | not significant |
| 8393 | GO_ALPHA_DNA_POLYMERASE_PRIMASE_COMPLEX                             | 0.96 | 0.27 | 0 | 0 | 0 | not significant |
| 8394 | GO_APICOLATERAL_PLASMA_MEMBRANE                                     | 0.96 | 0.27 | 0 | 0 | 0 | not significant |
| 8395 | GO_ASTROCYTE_DEVELOPMENT                                            | 0.96 | 0.27 | 0 | 0 | 0 | not significant |
| 8396 | GO_ESTABLISHMENT_OF_ENDOTHELIAL_BARRIER                             | 0.96 | 0.27 | 0 | 0 | 0 | not significant |
| 8397 | GO_NEUROTRANSMITTER_TRANSPORT                                       | 0.96 | 0.27 | 0 | 0 | 0 | not significant |
| 8398 | GO_OXIDIZED_DNA_BINDING                                             | 0.96 | 0.27 | 0 | 0 | 0 | not significant |
| 8399 | GO_POSITIVE_REGULATION_OF_SYNAPTIC_VESICLE_RECYCLING                | 0.96 | 0.27 | 0 | 0 | 0 | not significant |
| 8400 | GO_POSITIVE_REGULATION_OF_VIRAL_ENTRY_INTO_HOST_CELL                | 0.96 | 0.27 | 0 | 0 | 0 | not significant |
| 8401 | GO_PROTEIN_HYDROXYLATION                                            | 0.96 | 0.27 | 0 | 0 | 0 | not significant |
| 8402 | GO_REGULATION_OF_APPETITE                                           | 0.96 | 0.27 | 0 | 0 | 0 | not significant |
| 8403 | GO_REGULATION_OF_DEACETYLASE_ACTIVITY                               | 0.96 | 0.27 | 0 | 0 | 0 | not significant |
| 8404 | GO_RESPONSE_TO_FOLIC_ACID                                           | 0.96 | 0.27 | 0 | 0 | 0 | not significant |
| 8405 | GO_SECONDARY_LYSOSOME                                               | 0.96 | 0.27 | 0 | 0 | 0 | not significant |
| 8406 | KEGG_PROSTATE_CANCER                                                | 0.96 | 0.27 | 0 | 0 | 0 | not significant |
| 8407 | LIEN_BREAST_CARCINOMA_METAPLASTIC                                   | 0.96 | 0.27 | 0 | 0 | 0 | not significant |
| 8408 | REACTOME_DOWNSTREAM_SIGNAL_TRANSDUCTION                             | 0.96 | 0.27 | 0 | 0 | 0 | not significant |
| 8409 | STEGEER_ADIPOGENESIS_UP                                             | 0.96 | 0.27 | 0 | 0 | 0 | not significant |
| 8410 | VANHARANTA_UTERINE_FIBROID_WITH_7Q_DELETION_DN                      | 0.96 | 0.27 | 0 | 0 | 0 | not significant |
| 8411 | BASSO_HAIRY_CELL_LEUKEMIA_UP                                        | 0.96 | 0.26 | 0 | 0 | 0 | not significant |
| 8412 | GO_G_PROTEIN_COUPLED_RECEPTOR_SIGNALING_PATHWAY_INVOLVED_IN_HEAR    | 0.96 | 0.26 | 0 | 0 | 0 | not significant |
| 8413 | GO_HEPARIN_BIOSYNTHETIC_PROCESS                                     | 0.96 | 0.26 | 0 | 0 | 0 | not significant |
| 8414 | GO_MAP_KINASE_PHOSPHATASE_ACTIVITY                                  | 0.96 | 0.26 | 0 | 0 | 0 | not significant |
| 8415 | GO_MONOSACCHARIDE_BIOSYNTHETIC_PROCESS                              | 0.96 | 0.26 | 0 | 0 | 0 | not significant |
| 8416 | GO_NEGATIVE_REGULATION_OF_MAST_CELL_ACTIVATION                      | 0.96 | 0.26 | 0 | 0 | 0 | not significant |
| 8417 | GO_NEGATIVE_REGULATION_OF_PROTEOLYSIS                               | 0.96 | 0.26 | 0 | 0 | 0 | not significant |
| 8418 | GO_NUCLEAR_HORMONE_RECEPTOR_BINDING                                 | 0.96 | 0.26 | 0 | 0 | 0 | not significant |
| 8419 | GO_PHOSPHORYLASE_KINASE_COMPLEX                                     | 0.96 | 0.26 | 0 | 0 | 0 | not significant |
| 8420 | GO_POSITIVE_REGULATION_OF_PROTEIN_LOCALIZATION_TO_CELL_SURFACE      | 0.96 | 0.26 | 0 | 0 | 0 | not significant |
| 8421 | GO_POSITIVE_THYMIC_T_CELL_SELECTION                                 | 0.96 | 0.26 | 0 | 0 | 0 | not significant |
| 8422 | GO_REGULATION_OF_FERTILIZATION                                      | 0.96 | 0.26 | 0 | 0 | 0 | not significant |
| 8423 | OKUMURA_INFLAMMATORY_RESPONSE_LPS                                   | 0.96 | 0.26 | 0 | 0 | 0 | not significant |
| 8424 | GO_GPI_ANCHOR_TRANSAMIDASE_COMPLEX                                  | 0.96 | 0.25 | 0 | 0 | 0 | not significant |
| 8425 | SCHAEFFER_PROSTATE_DEVELOPMENT_48HR_DN                              | 0.96 | 0.25 | 0 | 0 | 0 | not significant |
| 8426 | GO_NUCLEAR_ENVELOPE                                                 | 0.96 | 0.24 | 0 | 0 | 0 | not significant |
| 8427 | GO_POSITIVE_REGULATION_OF_MUSCLE_ADAPTATION                         | 0.96 | 0.24 | 0 | 0 | 0 | not significant |
| 8428 | REACTOME_CYTOKINE_SIGNALING_IN_IMMUNE_SYSTEM                        | 0.96 | 0.22 | 0 | 0 | 0 | not significant |
| 8429 | GO_KINASE_BINDING                                                   | 0.96 | 0.21 | 0 | 0 | 0 | not significant |
| 8430 | GO_POSITIVE_REGULATION_OF_RNA_BIOSYNTHETIC_PROCESS                  | 0.96 | 0.19 | 0 | 0 | 0 | not significant |
| 8431 | GO_VISUAL_BEHAVIOR                                                  | 0.97 | 0.32 | 0 | 0 | 0 | not significant |
| 8432 | BEGUM_TARGETS_OF_PAX3_FOXP01_FUSION_DN                              | 0.97 | 0.31 | 0 | 0 | 0 | not significant |
| 8433 | CHR10P12                                                            | 0.97 | 0.31 | 0 | 0 | 0 | not significant |
| 8434 | GO_CYSSTEINE_TYPE_ENDOPEPTIDASE_REGULATOR_ACTIVITY_INVOLVED_IN_APOI | 0.97 | 0.31 | 0 | 0 | 0 | not significant |
| 8435 | GO_INTRAMOLECULAR_OXIDOREDUCTASE_ACTIVITY                           | 0.97 | 0.31 | 0 | 0 | 0 | not significant |
| 8436 | GO_REGULATION_OF_LEUKOCYTE_APOPTOTIC_PROCESS                        | 0.97 | 0.31 | 0 | 0 | 0 | not significant |
| 8437 | GO_REGULATION_OF_POTASSIUM_ION_TRANSPORT                            | 0.97 | 0.31 | 0 | 0 | 0 | not significant |
| 8438 | GO_RESPONSE_TO_MITOCHONDRIAL_DEPOLARISATION                         | 0.97 | 0.31 | 0 | 0 | 0 | not significant |
| 8439 | REACTOME_RAB_REGULATION_OF_TRAFFICKING                              | 0.97 | 0.31 | 0 | 0 | 0 | not significant |
| 8440 | REACTOME_SIGNALING_BY_SCF_KIT                                       | 0.97 | 0.31 | 0 | 0 | 0 | not significant |
| 8441 | BAE_BRCA1_TARGETS_DN                                                | 0.97 | 0.3  | 0 | 0 | 0 | not significant |
| 8442 | CHR13Q34                                                            | 0.97 | 0.3  | 0 | 0 | 0 | not significant |
| 8443 | CHR5Q12                                                             | 0.97 | 0.3  | 0 | 0 | 0 | not significant |
| 8444 | GO_I_PHOSPHATIDYLINOSITOL_BINDING                                   | 0.97 | 0.3  | 0 | 0 | 0 | not significant |
| 8445 | GO_CYSSTEINE_TYPE_ENDOPEPTIDASE_ACTIVATOR_ACTIVITY_INVOLVED_IN_APOF | 0.97 | 0.3  | 0 | 0 | 0 | not significant |
| 8446 | GO_LABYRINTHINE_LAYER_DEVELOPMENT                                   | 0.97 | 0.3  | 0 | 0 | 0 | not significant |
| 8447 | GO_NEGATIVE_REGULATION_OF_SIGNALING_RECEPTOR_ACTIVITY               | 0.97 | 0.3  | 0 | 0 | 0 | not significant |
| 8448 | GO_POSITIVE_REGULATION_OF_LIPID_KINASE_ACTIVITY                     | 0.97 | 0.3  | 0 | 0 | 0 | not significant |
| 8449 | GO_POSITIVE_REGULATION_OF_PHOSPHOPROTEIN_PHOSPHATASE_ACTIVITY       | 0.97 | 0.3  | 0 | 0 | 0 | not significant |
| 8450 | GO_RECEPTOR_MEDIATED_ENDOCYTOSIS                                    | 0.97 | 0.3  | 0 | 0 | 0 | not significant |
| 8451 | ICHIBA_GRAFT_VERSUS_HOST_DISEASE_D7_DN                              | 0.97 | 0.3  | 0 | 0 | 0 | not significant |
| 8452 | RAMPON_ENRICHED_LEARNING_ENVIRONMENT_LATE_UP                        | 0.97 | 0.3  | 0 | 0 | 0 | not significant |
| 8453 | REACTOME_CYTOSOLIC_SULFONATION_OF_SMALL_MOLECULES                   | 0.97 | 0.3  | 0 | 0 | 0 | not significant |
| 8454 | WANG_CLASSIC_ADIPOGENIC_TARGETS_OF_PPARG                            | 0.97 | 0.3  | 0 | 0 | 0 | not significant |
| 8455 | ACEVEDO_LIVER_CANCER_WITH_H3K9ME3_UP                                | 0.97 | 0.29 | 0 | 0 | 0 | not significant |
| 8456 | BENPORATH_MYC_TARGETS_WITH_EBOX                                     | 0.97 | 0.29 | 0 | 0 | 0 | not significant |
| 8457 | CHR2Q31                                                             | 0.97 | 0.29 | 0 | 0 | 0 | not significant |
| 8458 | GO_DNA_INTEGRITY_CHECKPOINT                                         | 0.97 | 0.29 | 0 | 0 | 0 | not significant |
| 8459 | GO_DNA_SECONDARY_STRUCTURE_BINDING                                  | 0.97 | 0.29 | 0 | 0 | 0 | not significant |
| 8460 | GO_IKAPPAB_KINASE_COMPLEX                                           | 0.97 | 0.29 | 0 | 0 | 0 | not significant |
| 8461 | GO_LONG_CHAIN_FATTY_ACID_BIOSYNTHETIC_PROCESS                       | 0.97 | 0.29 | 0 | 0 | 0 | not significant |
| 8462 | GO_MAMMARY_GLAND_EPITHELIAL_CELL_PROLIFERATION                      | 0.97 | 0.29 | 0 | 0 | 0 | not significant |
| 8463 | GO_NEGATIVE_REGULATION_OF_PROTEIN_OLIGOMERIZATION                   | 0.97 | 0.29 | 0 | 0 | 0 | not significant |
| 8464 | GO_PHOSPHATIDYLINOSITOL_KINASE_ACTIVITY                             | 0.97 | 0.29 | 0 | 0 | 0 | not significant |
| 8465 | GO_PHOSPHATIDYLINOSITOL_PHOSPHATE_5_PHOSPHATASE_ACTIVITY            | 0.97 | 0.29 | 0 | 0 | 0 | not significant |
| 8466 | GO_POSITIVE_REGULATION_OF_ORGANIC_ACID_TRANSPORT                    | 0.97 | 0.29 | 0 | 0 | 0 | not significant |
| 8467 | GO_REGULATION_OF_CELL_CYCLE_ARREST                                  | 0.97 | 0.29 | 0 | 0 | 0 | not significant |
| 8468 | GO_REGULATION_OF_DEFENSE_RESPONSE_TO_VIRUS                          | 0.97 | 0.29 | 0 | 0 | 0 | not significant |
| 8469 | GO_RIPOPTOSOME                                                      | 0.97 | 0.29 | 0 | 0 | 0 | not significant |
| 8470 | GO_SIGNAL_RECOGNITION_PARTICLE                                      | 0.97 | 0.29 | 0 | 0 | 0 | not significant |
| 8471 | GROSS_ELK3_TARGETS_DN                                               | 0.97 | 0.29 | 0 | 0 | 0 | not significant |
| 8472 | ICHIBA_GRAFT_VERSUS_HOST_DISEASE_D7_UP                              | 0.97 | 0.29 | 0 | 0 | 0 | not significant |
| 8473 | KEGG_NATURAL_KILLER_CELL_MEDIATED_CYTOTOXICITY                      | 0.97 | 0.29 | 0 | 0 | 0 | not significant |
| 8474 | REACTOME_INHIBITION_OF_REPLICATION_INITIATION_OF_DAMAGED_DNA_BY_RB1 | 0.97 | 0.29 | 0 | 0 | 0 | not significant |
| 8475 | REACTOME_RUNK3_REGULATES_CDKN1A_TRANSCRIPTION                       | 0.97 | 0.29 | 0 | 0 | 0 | not significant |
| 8476 | REACTOME_SIALIC_ACID_METABOLISM                                     | 0.97 | 0.29 | 0 | 0 | 0 | not significant |
| 8477 | RODWELL_AGING_KIDNEY_NO_BLOOD_DN                                    | 0.97 | 0.29 | 0 | 0 | 0 | not significant |
| 8478 | SASSON_RESPONSE_TO_FORSKOLIN_DN                                     | 0.97 | 0.29 | 0 | 0 | 0 | not significant |
| 8479 | VETTER_TARGETS_OF_PRKCA_AND_ETS1_DN                                 | 0.97 | 0.29 | 0 | 0 | 0 | not significant |
| 8480 | ZHANG_PROLIFERATING_VS_QUIESCENT                                    | 0.97 | 0.29 | 0 | 0 | 0 | not significant |
| 8481 | CHR6P23                                                             | 0.97 | 0.28 | 0 | 0 | 0 | not significant |
| 8482 | GAUSSMANN_MLL_AF4_FUSION_TARGETS_B_UP                               | 0.97 | 0.28 | 0 | 0 | 0 | not significant |
| 8483 | GO_ATTACHMENT_OF_GPI_ANCHOR_TO_PROTEIN                              | 0.97 | 0.28 | 0 | 0 | 0 | not significant |
| 8484 | GO_GDP DISSOCIATION INHIBITOR ACTIVITY                              | 0.97 | 0.28 | 0 | 0 | 0 | not significant |
| 8485 | GO_GLYCOSPHINGOLIPID_BINDING                                        | 0.97 | 0.28 | 0 | 0 | 0 | not significant |
| 8486 | GO_MODIFICATION_DEPENDENT_PROTEIN_BINDING                           | 0.97 | 0.28 | 0 | 0 | 0 | not significant |
| 8487 | GO_NEGATIVE_REGULATION_OF_B_CELL_APOPTOTIC_PROCESS                  | 0.97 | 0.28 | 0 | 0 | 0 | not significant |
| 8488 | GO_NEGATIVE_REGULATION_OF_ERBB_SIGNALING_PATHWAY                    | 0.97 | 0.28 | 0 | 0 | 0 | not significant |
| 8489 | GO_NEGATIVE_REGULATION_OF_MYELOID_CELL_APOPTOTIC_PROCESS            | 0.97 | 0.28 | 0 | 0 | 0 | not significant |
| 8490 | GO_REGULATION_OF_MULTICELLULAR_ORGANISM_GROWTH                      | 0.97 | 0.28 | 0 | 0 | 0 | not significant |

|      |                                                                    |      |      |   |   |   |                 |
|------|--------------------------------------------------------------------|------|------|---|---|---|-----------------|
| 8491 | IZUKA_LIVER_CANCER_PROGRESSION_L0_L1_DN                            | 0.97 | 0.28 | 0 | 0 | 0 | not significant |
| 8492 | REACTOME_CYTOSOLIC_IRON_SULFUR_CLUSTER_ASSEMBLY                    | 0.97 | 0.28 | 0 | 0 | 0 | not significant |
| 8493 | VALK_AML_WITH_CEBPA                                                | 0.97 | 0.28 | 0 | 0 | 0 | not significant |
| 8494 | WOTTON_RUNX_TARGETS_UP                                             | 0.97 | 0.28 | 0 | 0 | 0 | not significant |
| 8495 | ZHAN_EARLY_DIFFERENTIATION_GENES_DN                                | 0.97 | 0.28 | 0 | 0 | 0 | not significant |
| 8496 | BIOCARTA_STAT3_PATHWAY                                             | 0.97 | 0.27 | 0 | 0 | 0 | not significant |
| 8497 | GO_CELL_MORPHOGENESIS_INVOLVED_IN_DIFFERENTIATION                  | 0.97 | 0.27 | 0 | 0 | 0 | not significant |
| 8498 | GO_NEGATIVE_REGULATION_OF_LEUKOCYTE_DEGRANULATION                  | 0.97 | 0.27 | 0 | 0 | 0 | not significant |
| 8499 | GO_NEGATIVE_REGULATION_OF_MAST_CELL_ACTIVATION_INVOLVED_IN_IMMUNE  | 0.97 | 0.27 | 0 | 0 | 0 | not significant |
| 8500 | GO_PARAXIAL_MESODERM_MORPHOGENESIS                                 | 0.97 | 0.27 | 0 | 0 | 0 | not significant |
| 8501 | GO_PHAGOLYSOSOME_ASSEMBLY                                          | 0.97 | 0.27 | 0 | 0 | 0 | not significant |
| 8502 | GO_PHOSPHORYLASE_KINASE_ACTIVITY                                   | 0.97 | 0.27 | 0 | 0 | 0 | not significant |
| 8503 | GO_POSITIVE_REGULATION_OF_CELL_CYCLE_ARREST                        | 0.97 | 0.27 | 0 | 0 | 0 | not significant |
| 8504 | GO_PROTEIN_O_LINKED_FUCOSYLATION                                   | 0.97 | 0.27 | 0 | 0 | 0 | not significant |
| 8505 | GO_SUMO_LIGASE_ACTIVITY                                            | 0.97 | 0.27 | 0 | 0 | 0 | not significant |
| 8506 | MARTINEZ_TP53_TARGETS_DN                                           | 0.97 | 0.27 | 0 | 0 | 0 | not significant |
| 8507 | MYLLYKANGAS_AMPLIFICATION_HOT_SPOT_16                              | 0.97 | 0.27 | 0 | 0 | 0 | not significant |
| 8508 | BROWNE_HCMV_INFECTION_14HR_DN                                      | 0.97 | 0.26 | 0 | 0 | 0 | not significant |
| 8509 | GO_AXON                                                            | 0.97 | 0.26 | 0 | 0 | 0 | not significant |
| 8510 | GO_PHOSPHATIDYLINOSITOL_BINDING                                    | 0.97 | 0.26 | 0 | 0 | 0 | not significant |
| 8511 | GO_PHOSPHATIDYLINOSITOL_BISPHOSPHATE_KINASE_ACTIVITY               | 0.97 | 0.26 | 0 | 0 | 0 | not significant |
| 8512 | FULCHER_INFLAMMATORY_RESPONSE_LECTIN_VS_LPS_UP                     | 0.97 | 0.25 | 0 | 0 | 0 | not significant |
| 8513 | GO_NEGATIVE_REGULATION_OF_SIGNALING                                | 0.97 | 0.22 | 0 | 0 | 0 | not significant |
| 8514 | GO_APOPTOTIC_PROCESS                                               | 0.97 | 0.21 | 0 | 0 | 0 | not significant |
| 8515 | GO_NEUROGENESIS                                                    | 0.97 | 0.21 | 0 | 0 | 0 | not significant |
| 8516 | GO_NEURON_PART                                                     | 0.97 | 0.21 | 0 | 0 | 0 | not significant |
| 8517 | GO_REGULATION_OF_CELL_DIFFERENTIATION                              | 0.97 | 0.2  | 0 | 0 | 0 | not significant |
| 8518 | GO_PROTEIN_LOCALIZATION_TO_LYSOSOME                                | 0.98 | 0.34 | 0 | 0 | 0 | not significant |
| 8519 | NOTCH_DN.V1_DN                                                     | 0.98 | 0.34 | 0 | 0 | 0 | not significant |
| 8520 | GO_ENDODERM_DEVELOPMENT                                            | 0.98 | 0.33 | 0 | 0 | 0 | not significant |
| 8521 | GO_PROTON_TRANSPORTING_ATPASE_ACTIVITY_ROTATIONAL_MECHANISM        | 0.98 | 0.33 | 0 | 0 | 0 | not significant |
| 8522 | GO_RESPONSE_TO_ETHANOL                                             | 0.98 | 0.33 | 0 | 0 | 0 | not significant |
| 8523 | PDGF_UP.V1_UP                                                      | 0.98 | 0.33 | 0 | 0 | 0 | not significant |
| 8524 | BIOCARTA_HDAC_PATHWAY                                              | 0.98 | 0.32 | 0 | 0 | 0 | not significant |
| 8525 | CHR22Q11                                                           | 0.98 | 0.32 | 0 | 0 | 0 | not significant |
| 8526 | GO_CELL_CELL_JUNCTION_ORGANIZATION                                 | 0.98 | 0.32 | 0 | 0 | 0 | not significant |
| 8527 | GO_CELLULAR_RESPONSE_TO_AMMONIUM_ION                               | 0.98 | 0.32 | 0 | 0 | 0 | not significant |
| 8528 | GO_HETEROPHILIC_CELL_CELL_ADHESION_VIA_PLASMA_MEMBRANE_CELL_ADHES  | 0.98 | 0.32 | 0 | 0 | 0 | not significant |
| 8529 | GO_NEGATIVE_REGULATION_OF_PROTEIN_SERINE_THREONINE_KINASE_ACTIVITY | 0.98 | 0.32 | 0 | 0 | 0 | not significant |
| 8530 | GO_PHOSPHATIDYLINOSITOL_4_5_BISPHOSPHATE_BINDING                   | 0.98 | 0.32 | 0 | 0 | 0 | not significant |
| 8531 | GO_POSITIVE_REGULATION_OF_DENDRITE_DEVELOPMENT                     | 0.98 | 0.32 | 0 | 0 | 0 | not significant |
| 8532 | GO_PROTON_TRANSMEMBRANE_TRANSPORTER_ACTIVITY                       | 0.98 | 0.32 | 0 | 0 | 0 | not significant |
| 8533 | GO_REGULATION_OF_CD8_POSITIVE_ALPHA_BETA_T_CELL_ACTIVATION         | 0.98 | 0.32 | 0 | 0 | 0 | not significant |
| 8534 | KEGG_LYSINE_DEGRADATION                                            | 0.98 | 0.32 | 0 | 0 | 0 | not significant |
| 8535 | REACTOME_NOTCH_HLH_TRANSCRIPTION_PATHWAY                           | 0.98 | 0.32 | 0 | 0 | 0 | not significant |
| 8536 | BANDRES_RESPONSE_TO_CARMUSTIN_WITHOUT_MGMT_48HR_UP                 | 0.98 | 0.31 | 0 | 0 | 0 | not significant |
| 8537 | BCAT_GDS748_DN                                                     | 0.98 | 0.31 | 0 | 0 | 0 | not significant |
| 8538 | DORSAM_HOXA9_TARGETS_UP                                            | 0.98 | 0.31 | 0 | 0 | 0 | not significant |
| 8539 | GO_ACTIN_FILAMENT_DEPOLYMERIZATION                                 | 0.98 | 0.31 | 0 | 0 | 0 | not significant |
| 8540 | GO_CALCIIUM_ION_TRANSMEMBRANE_TRANSPORT                            | 0.98 | 0.31 | 0 | 0 | 0 | not significant |
| 8541 | GO_CELL_ADHESION_MEDIATOR_ACTIVITY                                 | 0.98 | 0.31 | 0 | 0 | 0 | not significant |
| 8542 | GO_CELL_DEATH_IN_RESPONSE_TO_HYDROGEN_PEROXIDE                     | 0.98 | 0.31 | 0 | 0 | 0 | not significant |
| 8543 | GO_G_PROTEIN_COUPLED_RECEPTOR_SIGNALING_PATHWAY_COUPLED_TO_CYC     | 0.98 | 0.31 | 0 | 0 | 0 | not significant |
| 8544 | GO_MONOSACCHARIDE_METABOLIC_PROCESS                                | 0.98 | 0.31 | 0 | 0 | 0 | not significant |
| 8545 | GO_NEGATIVE_REGULATION_OF_MULTICELLULAR_ORGANISM_PROCESS           | 0.98 | 0.31 | 0 | 0 | 0 | not significant |
| 8546 | GO_NEUROTRANSMITTER_BINDING                                        | 0.98 | 0.31 | 0 | 0 | 0 | not significant |
| 8547 | GO_NEUTRAL_LIPID_BIOSYNTHETIC_PROCESS                              | 0.98 | 0.31 | 0 | 0 | 0 | not significant |
| 8548 | GO_POSITIVE_REGULATION_OF_MACROAUTOPHAGY                           | 0.98 | 0.31 | 0 | 0 | 0 | not significant |
| 8549 | GO_POSITIVE_REGULATION_OF_MYELOID_LEUKOCYTE_MEDIATED_IMMUNITY      | 0.98 | 0.31 | 0 | 0 | 0 | not significant |
| 8550 | GO_POSITIVE_REGULATION_OF_PEPTIDYL_LYSINE_ACETYLATION              | 0.98 | 0.31 | 0 | 0 | 0 | not significant |
| 8551 | GO_POSITIVE_REGULATION_OF_RESPONSE_TO_DNA_DAMAGE_STIMULUS          | 0.98 | 0.31 | 0 | 0 | 0 | not significant |
| 8552 | GO_PTERIDINE_CONTAINING_COMPOUND_METABOLIC_PROCESS                 | 0.98 | 0.31 | 0 | 0 | 0 | not significant |
| 8553 | GO_REGULATION_OF_AXONOGENESIS                                      | 0.98 | 0.31 | 0 | 0 | 0 | not significant |
| 8554 | GO_REGULATION_OF_OSSIFICATION                                      | 0.98 | 0.31 | 0 | 0 | 0 | not significant |
| 8555 | GO_RHO_PROTEIN_SIGNAL_TRANSDUCTION                                 | 0.98 | 0.31 | 0 | 0 | 0 | not significant |
| 8556 | GO_TRANSLESION_SYNTHESIS                                           | 0.98 | 0.31 | 0 | 0 | 0 | not significant |
| 8557 | GO_TUMOR_NECROSIS_FACTOR_RECEPTOR_SUPERFAMILY_BINDING              | 0.98 | 0.31 | 0 | 0 | 0 | not significant |
| 8558 | GRABARCZYK_BCL11B_TARGETS_DN                                       | 0.98 | 0.31 | 0 | 0 | 0 | not significant |
| 8559 | MARSON_FOXP3_TARGETS_UP                                            | 0.98 | 0.31 | 0 | 0 | 0 | not significant |
| 8560 | REACTOME_DNA_DOUBLE_STRAND_BREAK_REPAIR                            | 0.98 | 0.31 | 0 | 0 | 0 | not significant |
| 8561 | REACTOME_KERATAN_SULFATE_KERATIN_METABOLISM                        | 0.98 | 0.31 | 0 | 0 | 0 | not significant |
| 8562 | REACTOME_ROBO_RECEPTORS_BIND_AKAP5                                 | 0.98 | 0.31 | 0 | 0 | 0 | not significant |
| 8563 | SMITH_TERT_TARGETS_DN                                              | 0.98 | 0.31 | 0 | 0 | 0 | not significant |
| 8564 | CHIARETTI_ACUTE_LYMPHOBLASTIC_LEUKEMIA_ZAP70                       | 0.98 | 0.3  | 0 | 0 | 0 | not significant |
| 8565 | CHR3Q21                                                            | 0.98 | 0.3  | 0 | 0 | 0 | not significant |
| 8566 | CHR6P25                                                            | 0.98 | 0.3  | 0 | 0 | 0 | not significant |
| 8567 | CHR6Q13                                                            | 0.98 | 0.3  | 0 | 0 | 0 | not significant |
| 8568 | GO_CELLULAR_AMINO_ACID_CATABOLIC_PROCESS                           | 0.98 | 0.3  | 0 | 0 | 0 | not significant |
| 8569 | GO_ERK1_AND_ERK2_CASCADE                                           | 0.98 | 0.3  | 0 | 0 | 0 | not significant |
| 8570 | GO_EXTRINSIC_COMPONENT_OF_ORGANELLE_MEMBRANE                       | 0.98 | 0.3  | 0 | 0 | 0 | not significant |
| 8571 | GO_REGULATION_OF_KIDNEY_DEVELOPMENT                                | 0.98 | 0.3  | 0 | 0 | 0 | not significant |
| 8572 | GO_RETROGRADE_TRANSPORT_ENDOSOME_TO_PLASMA_MEMBRANE                | 0.98 | 0.3  | 0 | 0 | 0 | not significant |
| 8573 | GO_TRANSFORMING_GROWTH_FACTOR_BETA_RECEPTOR_SIGNALING_PATHWAY      | 0.98 | 0.3  | 0 | 0 | 0 | not significant |
| 8574 | GO_WOUND_HEALING                                                   | 0.98 | 0.3  | 0 | 0 | 0 | not significant |
| 8575 | IVANOVA_HEMATOPOIESIS_STEM_CELL_AND_PROGENITOR                     | 0.98 | 0.3  | 0 | 0 | 0 | not significant |
| 8576 | KONDO_COLON_CANCER_HCP_WITH_H3K27ME1                               | 0.98 | 0.3  | 0 | 0 | 0 | not significant |
| 8577 | LEF1_UP.V1_UP                                                      | 0.98 | 0.3  | 0 | 0 | 0 | not significant |
| 8578 | PASTURAL_RIZ1_TARGETS_UP                                           | 0.98 | 0.3  | 0 | 0 | 0 | not significant |
| 8579 | POWERROY_MEDULLOBLASTOMA_DESMOPLASIC_VS_CLASSIC_DN                 | 0.98 | 0.3  | 0 | 0 | 0 | not significant |
| 8580 | REACTOME_PTK6_REGULATES_RTKS_AND_THEIR_EFFECTORS_AKT1_AND_DOK1     | 0.98 | 0.3  | 0 | 0 | 0 | not significant |
| 8581 | REACTOME_SMOOTH_MUSCLE_CONTRACTION                                 | 0.98 | 0.3  | 0 | 0 | 0 | not significant |
| 8582 | SCHAEFFER_PROSTATE_DEVELOPMENT_AND_CANCER_BOX1_DN                  | 0.98 | 0.3  | 0 | 0 | 0 | not significant |
| 8583 | SCHAVOLT_TARGETS_OF_TP53_AND_TP63                                  | 0.98 | 0.3  | 0 | 0 | 0 | not significant |
| 8584 | YANAGISAWA_LUNG_CANCER_RECURRENCE                                  | 0.98 | 0.3  | 0 | 0 | 0 | not significant |
| 8585 | BIOCARTA_IL4_PATHWAY                                               | 0.98 | 0.29 | 0 | 0 | 0 | not significant |
| 8586 | BRUINS_UVC_RESPONSE_VIA_TP53_GROUP_D                               | 0.98 | 0.29 | 0 | 0 | 0 | not significant |
| 8587 | GO_METAL_ION_HOMEOSTASIS                                           | 0.98 | 0.29 | 0 | 0 | 0 | not significant |
| 8588 | GO_NEGATIVE_REGULATION_OF_ERYTHROCYTE_DIFFERENTIATION              | 0.98 | 0.29 | 0 | 0 | 0 | not significant |
| 8589 | GO_NEGATIVE_REGULATION_OF_EXTRACELLULAR_MATRIX_ORGANIZATION        | 0.98 | 0.29 | 0 | 0 | 0 | not significant |
| 8590 | GO_POSITIVE_REGULATION_OF_DEFENSE_RESPONSE                         | 0.98 | 0.29 | 0 | 0 | 0 | not significant |
| 8591 | GO_SOMATODENDRITIC_COMPARTMENT                                     | 0.98 | 0.29 | 0 | 0 | 0 | not significant |
| 8592 | GO_SYNAPSE_ORGANIZATION                                            | 0.98 | 0.29 | 0 | 0 | 0 | not significant |
| 8593 | GO_VESICLE_FUSION_TO_PLASMA_MEMBRANE                               | 0.98 | 0.29 | 0 | 0 | 0 | not significant |
| 8594 | KEGG_VEGF_SIGNALING_PATHWAY                                        | 0.98 | 0.29 | 0 | 0 | 0 | not significant |
| 8595 | REACTOME_METABOLISM_OF_CARBOHYDRATES                               | 0.98 | 0.29 | 0 | 0 | 0 | not significant |
| 8596 | ZHOU_INFLAMMATORY_RESPONSE_LIVE_UP                                 | 0.98 | 0.29 | 0 | 0 | 0 | not significant |
| 8597 | ZIRN_TRETINOIN_RESPONSE_WT1_UP                                     | 0.98 | 0.29 | 0 | 0 | 0 | not significant |
| 8598 | GO_EXTRINSIC_COMPONENT_OF_MEMBRANE                                 | 0.98 | 0.28 | 0 | 0 | 0 | not significant |
| 8599 | GO_FOREGUT_MORPHOGENESIS                                           | 0.98 | 0.28 | 0 | 0 | 0 | not significant |

|      |                                                                    |      |      |   |   |   |                 |
|------|--------------------------------------------------------------------|------|------|---|---|---|-----------------|
| 8600 | GO_NEGATIVE_REGULATION_OF_CYTOPLASMIC_TRANSLATION                  | 0.98 | 0.28 | 0 | 0 | 0 | not significant |
| 8601 | GO_POSITIVE_REGULATION_OF_CENTROSOME_DUPLICATION                   | 0.98 | 0.28 | 0 | 0 | 0 | not significant |
| 8602 | GO_PROTEIN_RETENTION_IN_ER_LUMEN                                   | 0.98 | 0.28 | 0 | 0 | 0 | not significant |
| 8603 | GO_RESPONSE_TO_METAL_ION                                           | 0.98 | 0.28 | 0 | 0 | 0 | not significant |
| 8604 | SCHLOSSER_SERUM_RESPONSE_DN                                        | 0.98 | 0.27 | 0 | 0 | 0 | not significant |
| 8605 | GO_AUTOPHAGOSOME_MATURATION                                        | 0.99 | 0.35 | 0 | 0 | 0 | not significant |
| 8606 | GO_PEPTIDE_HORMONE_SECRETION                                       | 0.99 | 0.35 | 0 | 0 | 0 | not significant |
| 8607 | GO_14_3_3_PROTEIN_BINDING                                          | 0.99 | 0.34 | 0 | 0 | 0 | not significant |
| 8608 | GO_DOUBLE_STRAND_BREAK_REPAIR                                      | 0.99 | 0.34 | 0 | 0 | 0 | not significant |
| 8609 | GO_HISTONE_DEACETYLATION                                           | 0.99 | 0.34 | 0 | 0 | 0 | not significant |
| 8610 | GO_MICROTUBULE_NUCLEATION                                          | 0.99 | 0.34 | 0 | 0 | 0 | not significant |
| 8611 | GO_POSITIVE_REGULATION_OF_ANIMAL_ORGAN_MORPHOGENESIS               | 0.99 | 0.34 | 0 | 0 | 0 | not significant |
| 8612 | KEGG_NUCLEOTIDE_EXCISION_REPAIR                                    | 0.99 | 0.34 | 0 | 0 | 0 | not significant |
| 8613 | NEMETH_INFLAMMATORY_RESPONSE_LPS_DN                                | 0.99 | 0.34 | 0 | 0 | 0 | not significant |
| 8614 | NUTT_GBM_VS_AO_GLIOMA_UP                                           | 0.99 | 0.34 | 0 | 0 | 0 | not significant |
| 8615 | AIYAR_COBRA1_TARGETS_DN                                            | 0.99 | 0.33 | 0 | 0 | 0 | not significant |
| 8616 | GO_CELLULAR_RESPONSE_TO ABIOTIC_STIMULUS                           | 0.99 | 0.33 | 0 | 0 | 0 | not significant |
| 8617 | GO_COPII_COATED_ER_TO_GOLGI_TRANSPORT_VESICLE                      | 0.99 | 0.33 | 0 | 0 | 0 | not significant |
| 8618 | GO_Glutamine_Metabolic_Process                                     | 0.99 | 0.33 | 0 | 0 | 0 | not significant |
| 8619 | GO_POSITIVE_REGULATION_OF_LEUKOCYTE_APOPTOTIC_PROCESS              | 0.99 | 0.33 | 0 | 0 | 0 | not significant |
| 8620 | GO_RESPONSE_TO_HYDROGEN_PEROXIDE                                   | 0.99 | 0.33 | 0 | 0 | 0 | not significant |
| 8621 | GO_SOMATIC_DIVERSIFICATION_OF_IMMUNE_RECEPTORS_VIA_GERMLINE_RECOM  | 0.99 | 0.33 | 0 | 0 | 0 | not significant |
| 8622 | KRIEG_KDM3A_TARGETS_NOT_HYPOXIA                                    | 0.99 | 0.33 | 0 | 0 | 0 | not significant |
| 8623 | NUTT_GBM_VS_AO_GLIOMA_DN                                           | 0.99 | 0.33 | 0 | 0 | 0 | not significant |
| 8624 | REACTOME_EPH_EPHRIN_MEDIATED_REPULSION_OF_CELLS                    | 0.99 | 0.33 | 0 | 0 | 0 | not significant |
| 8625 | REACTOME_G0_AND_EARLY_G1                                           | 0.99 | 0.33 | 0 | 0 | 0 | not significant |
| 8626 | REACTOME_PHOSPHOLIPID_METABOLISM                                   | 0.99 | 0.33 | 0 | 0 | 0 | not significant |
| 8627 | FARMER_BREAST_CANCER_CLUSTER_7                                     | 0.99 | 0.32 | 0 | 0 | 0 | not significant |
| 8628 | FERRANDO_TAL1_NEIGHBORS                                            | 0.99 | 0.32 | 0 | 0 | 0 | not significant |
| 8629 | GO ASPARTATE_FAMILY_AMINO_ACID_BIOSYNTHETIC_PROCESS                | 0.99 | 0.32 | 0 | 0 | 0 | not significant |
| 8630 | GO CARBON_NITROGEN_LIGASE_ACTIVITY_WITH_Glutamine_AS_AMIDO_N_DONC  | 0.99 | 0.32 | 0 | 0 | 0 | not significant |
| 8631 | GO_CELL_CYCLE_ARREST                                               | 0.99 | 0.32 | 0 | 0 | 0 | not significant |
| 8632 | GO DNA METHYLATION                                                 | 0.99 | 0.32 | 0 | 0 | 0 | not significant |
| 8633 | GO MITOTIC_DNA_INTEGRITY_CHECKPOINT                                | 0.99 | 0.32 | 0 | 0 | 0 | not significant |
| 8634 | GO_NEGATIVE_REGULATION_OF_ACTIN_FILAMENT_BUNDLE_ASSEMBLY           | 0.99 | 0.32 | 0 | 0 | 0 | not significant |
| 8635 | GO_NEGATIVE_REGULATION_OF_ALPHA_BETA_T_CELL_ACTIVATION             | 0.99 | 0.32 | 0 | 0 | 0 | not significant |
| 8636 | GO_NEGATIVE_REGULATION_OF_G_PROTEIN_COUPLED_RECEPTOR_SIGNALING_F   | 0.99 | 0.32 | 0 | 0 | 0 | not significant |
| 8637 | GO_NEGATIVE_REGULATION_OF_PEPTIDE_HORMONE_SECRETION                | 0.99 | 0.32 | 0 | 0 | 0 | not significant |
| 8638 | GO_NUCLEOSIDE_BIPHOSPHATE_BIOSYNTHETIC_PROCESS                     | 0.99 | 0.32 | 0 | 0 | 0 | not significant |
| 8639 | GO ODONTOGENESIS                                                   | 0.99 | 0.32 | 0 | 0 | 0 | not significant |
| 8640 | GO_POSITIVE_REGULATION_OF_SMOOTHENED_SIGNALING_PATHWAY             | 0.99 | 0.32 | 0 | 0 | 0 | not significant |
| 8641 | GO PROTEIN_KINASE_COMPLEX                                          | 0.99 | 0.32 | 0 | 0 | 0 | not significant |
| 8642 | GO_REGULATION_OF_ANATOMICAL_STRUCTURE_SIZE                         | 0.99 | 0.32 | 0 | 0 | 0 | not significant |
| 8643 | GO SIGNAL_RELEASE                                                  | 0.99 | 0.32 | 0 | 0 | 0 | not significant |
| 8644 | GO_SODIUM_ION_HOMEOSTASIS                                          | 0.99 | 0.32 | 0 | 0 | 0 | not significant |
| 8645 | LEE_LIVER_CANCER_CIPROFIBRATE_DN                                   | 0.99 | 0.32 | 0 | 0 | 0 | not significant |
| 8646 | LENAOUR_DENDRITIC_CELL_MATURATION_DN                               | 0.99 | 0.32 | 0 | 0 | 0 | not significant |
| 8647 | PID_HES_HEY_PATHWAY                                                | 0.99 | 0.32 | 0 | 0 | 0 | not significant |
| 8648 | REACTOME_METABOLISM_OF_VITAMINS_AND_COFACTORS                      | 0.99 | 0.32 | 0 | 0 | 0 | not significant |
| 8649 | SHI_SPARC_TARGETS_UP                                               | 0.99 | 0.32 | 0 | 0 | 0 | not significant |
| 8650 | DELACROIX_RAR_BOUND_ES                                             | 0.99 | 0.31 | 0 | 0 | 0 | not significant |
| 8651 | GO_CALMODULIN_BINDING                                              | 0.99 | 0.31 | 0 | 0 | 0 | not significant |
| 8652 | GO_DEOXYRIBONUCLEOTIDE_BIOSYNTHETIC_PROCESS                        | 0.99 | 0.31 | 0 | 0 | 0 | not significant |
| 8653 | GO_LIGASE_ACTIVITY                                                 | 0.99 | 0.31 | 0 | 0 | 0 | not significant |
| 8654 | GO_NEGATIVE_REGULATION_OF_INSULIN_SECRETION                        | 0.99 | 0.31 | 0 | 0 | 0 | not significant |
| 8655 | GO_ONE_CARBON_METABOLIC_PROCESS                                    | 0.99 | 0.31 | 0 | 0 | 0 | not significant |
| 8656 | GO_PHOTORECEPTOR_CELL_DEVELOPMENT                                  | 0.99 | 0.31 | 0 | 0 | 0 | not significant |
| 8657 | GO_POSITIVE_REGULATION_OF_KIDNEY_DEVELOPMENT                       | 0.99 | 0.31 | 0 | 0 | 0 | not significant |
| 8658 | GO_REGULATION_OF_ANATOMICAL_STRUCTURE_MORPHOGENESIS                | 0.99 | 0.31 | 0 | 0 | 0 | not significant |
| 8659 | GO_REGULATION_OF_APOPTOTIC_SIGNALING_PATHWAY                       | 0.99 | 0.31 | 0 | 0 | 0 | not significant |
| 8660 | GO_REGULATION_OF_CATION_TRANSMEMBRANE_TRANSPORT                    | 0.99 | 0.31 | 0 | 0 | 0 | not significant |
| 8661 | GO_REGULATION_OF_DEFENSE_RESPONSE                                  | 0.99 | 0.31 | 0 | 0 | 0 | not significant |
| 8662 | GO_REGULATION_OF_MITOCHONDRION_ORGANIZATION                        | 0.99 | 0.31 | 0 | 0 | 0 | not significant |
| 8663 | GO_SULFURIC_ESTER_HYDROLASE_ACTIVITY                               | 0.99 | 0.31 | 0 | 0 | 0 | not significant |
| 8664 | NUYTEN_NIPP1_TARGETS_DN                                            | 0.99 | 0.31 | 0 | 0 | 0 | not significant |
| 8665 | ONDER_CDH1_TARGETS_3_UP                                            | 0.99 | 0.31 | 0 | 0 | 0 | not significant |
| 8666 | BERTUCCI_INVASIVE_CARCINOMA_DUCTAL_VS_LOBULAR_UP                   | 0.99 | 0.3  | 0 | 0 | 0 | not significant |
| 8667 | BIOCARTA_CELLCYCLE_PATHWAY                                         | 0.99 | 0.3  | 0 | 0 | 0 | not significant |
| 8668 | DAZARD_UV_RESPONSE_CLUSTER_G4                                      | 0.99 | 0.3  | 0 | 0 | 0 | not significant |
| 8669 | GO_LEFT_RIGHT_PATTERN_FORMATION                                    | 0.99 | 0.3  | 0 | 0 | 0 | not significant |
| 8670 | GO_MODIFIED_AMINO_ACID_TRANSMEMBRANE_TRANSPORTER_ACTIVITY          | 0.99 | 0.3  | 0 | 0 | 0 | not significant |
| 8671 | GO_NEGATIVE_REGULATION_OF_MYELOID_LEUKOCYTE_MEDIATED_IMMUNITY      | 0.99 | 0.3  | 0 | 0 | 0 | not significant |
| 8672 | GO PEPTIDYL_TYROSINE_MODIFICATION                                  | 0.99 | 0.3  | 0 | 0 | 0 | not significant |
| 8673 | GO_POSITIVE_REGULATION_OF_TRANSCRIPTION_BY_RNA_POLYMERASE_II       | 0.99 | 0.3  | 0 | 0 | 0 | not significant |
| 8674 | GO_POSITIVE_REGULATION_OF_TYPE_2_IMMUNE_RESPONSE                   | 0.99 | 0.3  | 0 | 0 | 0 | not significant |
| 8675 | SASAKI_TARGETS_OF_TP73_AND_TP63                                    | 0.99 | 0.3  | 0 | 0 | 0 | not significant |
| 8676 | WEBER_METHYLATED_HCP_IN_FIBROBLAST_DN                              | 0.99 | 0.3  | 0 | 0 | 0 | not significant |
| 8677 | ZEMBUTSU_SENSITIVITY_TO_FLUOROURACIL                               | 0.99 | 0.3  | 0 | 0 | 0 | not significant |
| 8678 | GO_DEVELOPMENT_OF_SECONDARY_FEMALE_SEXUAL_CHARACTERISTICS          | 0.99 | 0.29 | 0 | 0 | 0 | not significant |
| 8679 | GO_PHOTORECEPTOR_CELL_OUTER_SEGMENT_ORGANIZATION                   | 0.99 | 0.29 | 0 | 0 | 0 | not significant |
| 8680 | GO_POSITIVE_REGULATION_OF_TOLL_LIKE_RECEPTOR_4_SIGNALING_PATHWAY   | 0.99 | 0.29 | 0 | 0 | 0 | not significant |
| 8681 | GO_RESPONSE_TO ABIOTIC_STIMULUS                                    | 0.99 | 0.29 | 0 | 0 | 0 | not significant |
| 8682 | REACTOME_GALACTOSE_CATABOLISM                                      | 0.99 | 0.29 | 0 | 0 | 0 | not significant |
| 8683 | REACTOME_PHASE_2_PLATEAU_PHASE                                     | 0.99 | 0.29 | 0 | 0 | 0 | not significant |
| 8684 | BIOCARTA_NOTCH_PATHWAY                                             | 0.99 | 0.28 | 0 | 0 | 0 | not significant |
| 8685 | GO_CDP_ALCOHOL_PHOSPHATIDYLTRANSFERASE_ACTIVITY                    | 0.99 | 0.28 | 0 | 0 | 0 | not significant |
| 8686 | GO POSITIVE_REGULATION_OF_PRODUCTION_OF_MIRNAS_INVOLVED_IN_GENE_S  | 0.99 | 0.28 | 0 | 0 | 0 | not significant |
| 8687 | GO_PROTEIN_GLYCOSYLATION_IN_GOLGI                                  | 0.99 | 0.28 | 0 | 0 | 0 | not significant |
| 8688 | KONG_E2F1_TARGETS                                                  | 0.99 | 0.28 | 0 | 0 | 0 | not significant |
| 8689 | GO_DOUBLE_STRANDED_METHYLATED_DNA_BINDING                          | 0.99 | 0.27 | 0 | 0 | 0 | not significant |
| 8690 | GO_PLATELET_ALPHA_Granule_Lumen                                    | 1.00 | 0.37 | 0 | 0 | 0 | not significant |
| 8691 | ZHAN_LATE_DIFFERENTIATION_GENES_UP                                 | 1.00 | 0.37 | 0 | 0 | 0 | not significant |
| 8692 | GO_ENDOCYTIC_VESICLE                                               | 1.00 | 0.36 | 0 | 0 | 0 | not significant |
| 8693 | GO_REGULATION_OF_OSTEOBLAST_DIFFERENTIATION                        | 1.00 | 0.36 | 0 | 0 | 0 | not significant |
| 8694 | GO_SPHINGOLIPID_BIOSYNTHETIC_PROCESS                               | 1.00 | 0.36 | 0 | 0 | 0 | not significant |
| 8695 | REACTOME_N_GLYCAN_TRIMMING_IN_THE_ER_AND_CALNEXIN_CALRETICULIN_CYC | 1.00 | 0.36 | 0 | 0 | 0 | not significant |
| 8696 | WORSCHER_TUMOR_REJECTION_UP                                        | 1.00 | 0.36 | 0 | 0 | 0 | not significant |
| 8697 | BIOCARTA_TCR_PATHWAY                                               | 1.00 | 0.35 | 0 | 0 | 0 | not significant |
| 8698 | CHEMNITZ_RESPONSE_TO_PROSTAGLANDIN_E2_DN                           | 1.00 | 0.35 | 0 | 0 | 0 | not significant |
| 8699 | DARWICHE_PAPILLOMA_RISK_LOW_DN                                     | 1.00 | 0.35 | 0 | 0 | 0 | not significant |
| 8700 | GO_ANATOMICAL_STRUCTURE_MATURATION                                 | 1.00 | 0.35 | 0 | 0 | 0 | not significant |
| 8701 | GO_APICAL_PLASMA_MEMBRANE                                          | 1.00 | 0.35 | 0 | 0 | 0 | not significant |
| 8702 | GO_DETOXIFICATION                                                  | 1.00 | 0.35 | 0 | 0 | 0 | not significant |
| 8703 | GO ENERGY_COUPLED_PROTON_TRANSMEMBRANE_TRANSPORT_AGAINST_ELEC      | 1.00 | 0.35 | 0 | 0 | 0 | not significant |
| 8704 | GO_PANCREAS_DEVELOPMENT                                            | 1.00 | 0.35 | 0 | 0 | 0 | not significant |
| 8705 | GO_PROTEIN_TARGETING_TO_MEMBRANE                                   | 1.00 | 0.35 | 0 | 0 | 0 | not significant |
| 8706 | GO_RENAL_SYSTEM_DEVELOPMENT                                        | 1.00 | 0.35 | 0 | 0 | 0 | not significant |
| 8707 | GO_REPLICATION_FORK                                                | 1.00 | 0.35 | 0 | 0 | 0 | not significant |
| 8708 | GO_RESPONSE_TO_RETINOIC_ACID                                       | 1.00 | 0.35 | 0 | 0 | 0 | not significant |

|      |                                                                     |      |      |   |   |   |                 |
|------|---------------------------------------------------------------------|------|------|---|---|---|-----------------|
| 8709 | GO_SECONDARY_METABOLIC_PROCESS                                      | 1.00 | 0.35 | 0 | 0 | 0 | not significant |
| 8710 | GO_THIOLESTER_BIOSYNTHETIC_PROCESS                                  | 1.00 | 0.35 | 0 | 0 | 0 | not significant |
| 8711 | GO_THIOLESTER_HYDROLASE_ACTIVITY                                    | 1.00 | 0.35 | 0 | 0 | 0 | not significant |
| 8712 | GRUETZMANN_PANCREATIC_CANCER_DN                                     | 1.00 | 0.35 | 0 | 0 | 0 | not significant |
| 8713 | HALLMARK_UV_RESPONSE_DN                                             | 1.00 | 0.35 | 0 | 0 | 0 | not significant |
| 8714 | JIANG_VHL_TARGETS                                                   | 1.00 | 0.35 | 0 | 0 | 0 | not significant |
| 8715 | PEDIROLI_MIR31_TARGETS_UP                                           | 1.00 | 0.35 | 0 | 0 | 0 | not significant |
| 8716 | PEREZ_TP53_AND_TP63_TARGETS                                         | 1.00 | 0.35 | 0 | 0 | 0 | not significant |
| 8717 | REACTOME_CONSTITUTIVE_SIGNALING_BY_ABERRANT_P13K_IN_CANCER          | 1.00 | 0.35 | 0 | 0 | 0 | not significant |
| 8718 | REACTOME_DNA_DAMAGE_TELOMERE_STRESS_INDUCED_SENESCENCE              | 1.00 | 0.35 | 0 | 0 | 0 | not significant |
| 8719 | REACTOME_EXTRA_NUCLEAR_ESTROGEN_SIGNALING                           | 1.00 | 0.35 | 0 | 0 | 0 | not significant |
| 8720 | GO_ATP_HYDROLYSIS_COUPLED_TRANSMEMBRANE_TRANSPORT                   | 1.00 | 0.34 | 0 | 0 | 0 | not significant |
| 8721 | GO_BONE_REMODELING                                                  | 1.00 | 0.34 | 0 | 0 | 0 | not significant |
| 8722 | GO_DRUG_METABOLIC_PROCESS                                           | 1.00 | 0.34 | 0 | 0 | 0 | not significant |
| 8723 | GO_GAMETE_GENERATION                                                | 1.00 | 0.34 | 0 | 0 | 0 | not significant |
| 8724 | GO_NEGATIVE_REGULATION_OF_PROTEIN_METABOLIC_PROCESS                 | 1.00 | 0.34 | 0 | 0 | 0 | not significant |
| 8725 | GO_OXIDATION_REDUCTION_PROCESS                                      | 1.00 | 0.34 | 0 | 0 | 0 | not significant |
| 8726 | GO_POSITIVE_REGULATION_OF_APOPTOTIC_SIGNALING_PATHWAY               | 1.00 | 0.34 | 0 | 0 | 0 | not significant |
| 8727 | GO_RESPONSE_TO ESTRADIOL                                            | 1.00 | 0.34 | 0 | 0 | 0 | not significant |
| 8728 | GO_SERINE_THREONINE_PROTEIN_KINASE_COMPLEX                          | 1.00 | 0.34 | 0 | 0 | 0 | not significant |
| 8729 | GO_TOLL LIKE RECEPTOR_9_SIGNALING_PATHWAY                           | 1.00 | 0.34 | 0 | 0 | 0 | not significant |
| 8730 | LEE_LIVER_CANCER_MYC_DN                                             | 1.00 | 0.34 | 0 | 0 | 0 | not significant |
| 8731 | ZHAN_MULTIPLE_MYELOMA_PR_DN                                         | 1.00 | 0.34 | 0 | 0 | 0 | not significant |
| 8732 | BILANGES_SERUM_RESPONSE_TRANSLATION                                 | 1.00 | 0.33 | 0 | 0 | 0 | not significant |
| 8733 | GO_ADIPOSE_TISSUE_DEVELOPMENT                                       | 1.00 | 0.33 | 0 | 0 | 0 | not significant |
| 8734 | GO_FOLIC_ACID_METABOLIC_PROCESS                                     | 1.00 | 0.33 | 0 | 0 | 0 | not significant |
| 8735 | GO_NEGATIVE_REGULATION_OF_DEVELOPMENTAL_PROCESS                     | 1.00 | 0.33 | 0 | 0 | 0 | not significant |
| 8736 | GO_NUCLEOBASE_METABOLIC_PROCESS                                     | 1.00 | 0.33 | 0 | 0 | 0 | not significant |
| 8737 | GO_POSITIVE_REGULATION_OF_DOUBLE_STRAND_BREAK_REPAIR                | 1.00 | 0.33 | 0 | 0 | 0 | not significant |
| 8738 | GO_REGULATION_OF_AMPA_RECEPTOR_ACTIVITY                             | 1.00 | 0.33 | 0 | 0 | 0 | not significant |
| 8739 | GO_REGULATION_OF_POTASSIUM_ION_TRANSMEMBRANE_TRANSPORTER_ACTIVI     | 1.00 | 0.33 | 0 | 0 | 0 | not significant |
| 8740 | GO_REGULATION_OF_PROTEIN_TARGETING                                  | 1.00 | 0.33 | 0 | 0 | 0 | not significant |
| 8741 | GO_STORE_OPERATED_CALCIIUM_ENTRY                                    | 1.00 | 0.33 | 0 | 0 | 0 | not significant |
| 8742 | GO_SYNAPTIC_VESICLE_ENDOSOMAL_PROCESSING                            | 1.00 | 0.33 | 0 | 0 | 0 | not significant |
| 8743 | PAPASPYRIDONOS_UNSTABLE_ATEROSCLEROTIC_PLAQUE_UP                    | 1.00 | 0.33 | 0 | 0 | 0 | not significant |
| 8744 | RASHI_RESPONSE_TO_IONIZING_RADIATION_4                              | 1.00 | 0.33 | 0 | 0 | 0 | not significant |
| 8745 | REACTOME_INTERFERON_GAMMA_SIGNALING                                 | 1.00 | 0.33 | 0 | 0 | 0 | not significant |
| 8746 | REACTOME_METABOLISM_OF_FOLATE_AND_PTERINES                          | 1.00 | 0.33 | 0 | 0 | 0 | not significant |
| 8747 | TONKS_TARGETS_OF_RUNX1_RUNX1T1_FUSION_GNANULOCYTE_DN                | 1.00 | 0.33 | 0 | 0 | 0 | not significant |
| 8748 | GO_COBALAMIN_BINDING                                                | 1.00 | 0.32 | 0 | 0 | 0 | not significant |
| 8749 | GO_NEGATIVE_REGULATION_OF_HYDROLASE_ACTIVITY                        | 1.00 | 0.32 | 0 | 0 | 0 | not significant |
| 8750 | GO_ORGANOPHOSPHATE_METABOLIC_PROCESS                                | 1.00 | 0.32 | 0 | 0 | 0 | not significant |
| 8751 | GO_POSITIVE_REGULATION_OF_CD8_POSITIVE_ALPHA_BETA_T_CELL_ACTIVATION | 1.00 | 0.32 | 0 | 0 | 0 | not significant |
| 8752 | GO_POSITIVE_REGULATION_OF_CYTOKINE_PRODUCTION_INVOLVED_IN_IMMUNE_F  | 1.00 | 0.32 | 0 | 0 | 0 | not significant |
| 8753 | GO_POSITIVE_REGULATION_OF_INTERLEUKIN_6_PRODUCTION                  | 1.00 | 0.32 | 0 | 0 | 0 | not significant |
| 8754 | GO_PROTEIN_HOMODIMERIZATION_ACTIVITY                                | 1.00 | 0.32 | 0 | 0 | 0 | not significant |
| 8755 | GO_REGULATION_OF_BODY_FLUID_LEVELS                                  | 1.00 | 0.32 | 0 | 0 | 0 | not significant |
| 8756 | GO_SEQUENCE_SPECIFIC_DNA_BINDING                                    | 1.00 | 0.32 | 0 | 0 | 0 | not significant |
| 8757 | HALLMARK_APICAL_SURFACE                                             | 1.00 | 0.32 | 0 | 0 | 0 | not significant |
| 8758 | HALLMARK_XENOBIOTIC_METABOLISM                                      | 1.00 | 0.32 | 0 | 0 | 0 | not significant |
| 8759 | KIM_MYC_AMPLIFICATION_TARGETS_DN                                    | 1.00 | 0.32 | 0 | 0 | 0 | not significant |
| 8760 | LUI_THYROID_CANCER_PAX8_PPARG_UP                                    | 1.00 | 0.32 | 0 | 0 | 0 | not significant |
| 8761 | NATSUME_RESPONSE_TO_INTERFERON_BETA_DN                              | 1.00 | 0.32 | 0 | 0 | 0 | not significant |
| 8762 | TERAMOTO_OPN_TARGETS_CLUSTER_4                                      | 1.00 | 0.32 | 0 | 0 | 0 | not significant |
| 8763 | GO_DEATH_INDUCING_SIGNALING_COMPLEX                                 | 1.00 | 0.31 | 0 | 0 | 0 | not significant |
| 8764 | GO_IMMUNOLOGICAL_SYNAPSE                                            | 1.00 | 0.31 | 0 | 0 | 0 | not significant |
| 8765 | GO_MACROPINOCTOSIS                                                  | 1.00 | 0.31 | 0 | 0 | 0 | not significant |
| 8766 | GO_MODULATION_OF_MOLECULAR_FUNCTION_IN_OTHER_ORGANISM               | 1.00 | 0.31 | 0 | 0 | 0 | not significant |
| 8767 | GO_MULTIVESICULAR_BODY_MEMBRANE                                     | 1.00 | 0.31 | 0 | 0 | 0 | not significant |
| 8768 | GO_NEGATIVE_REGULATION_OF_CYTOKINESIS                               | 1.00 | 0.31 | 0 | 0 | 0 | not significant |
| 8769 | GO_NUCLEOBASE_TRANSPORT                                             | 1.00 | 0.31 | 0 | 0 | 0 | not significant |
| 8770 | GO_PROSTAGLANDIN_TRANSPORT                                          | 1.00 | 0.31 | 0 | 0 | 0 | not significant |
| 8771 | GO_PYRIDINE_NUCLEOSIDE_CATABOLIC_PROCESS                            | 1.00 | 0.31 | 0 | 0 | 0 | not significant |
| 8772 | GO_REGULATION_OF_PROTEIN_KINASE_A_SIGNALING                         | 1.00 | 0.31 | 0 | 0 | 0 | not significant |
| 8773 | GO_REGULATION_OF_STORE_OPERATED_CALCIIUM_ENTRY                      | 1.00 | 0.31 | 0 | 0 | 0 | not significant |
| 8774 | GO_WATER_SOLUBLE_VITAMIN_BIOSYNTHETIC_PROCESS                       | 1.00 | 0.31 | 0 | 0 | 0 | not significant |
| 8775 | REACTOME_CASPASE_MEDIATED_CLEAVAGE_OF_CYTOSKELETAL_PROTEINS         | 1.00 | 0.31 | 0 | 0 | 0 | not significant |
| 8776 | REACTOME_ERYTHROPOIETIN_ACTIVATES_PHOSPHOINOSITIDE_3_KINASE_P13K    | 1.00 | 0.31 | 0 | 0 | 0 | not significant |
| 8777 | SENESE_HDAC3_TARGETS_DN                                             | 1.00 | 0.31 | 0 | 0 | 0 | not significant |
| 8778 | GO_DORSAL_VENTRAL_AXIS_SPECIFICATION                                | 1.00 | 0.3  | 0 | 0 | 0 | not significant |
| 8779 | GO_L GLUTAMATE_IMPORT                                               | 1.00 | 0.3  | 0 | 0 | 0 | not significant |
| 8780 | GO_OXIDOREDUCTASE_ACTIVITY_ACTING_ON_THE_CH_CH_GROUP_OF_DONORS      | 1.00 | 0.3  | 0 | 0 | 0 | not significant |
| 8781 | GO_PRESPLICEOSOME                                                   | 1.00 | 0.3  | 0 | 0 | 0 | not significant |
| 8782 | GO_VERY_LOW_DENSITY_LIPOPROTEIN_PARTICLE_ASSEMBLY                   | 1.00 | 0.3  | 0 | 0 | 0 | not significant |
| 8783 | GO_C_X_C_CHEMOKINE_RECEPTOR_ACTIVITY                                | 1.00 | 0.29 | 0 | 0 | 0 | not significant |
| 8784 | GO_CELL_MIGRATION_INVOLVED_IN_GASTRULATION                          | 1.00 | 0.29 | 0 | 0 | 0 | not significant |
| 8785 | GO_CELLULAR_TRIGLYCERIDE_HOMEOSTASIS                                | 1.00 | 0.29 | 0 | 0 | 0 | not significant |
| 8786 | GO_VASCULAR_SMOOTH_MUSCLE_CELL_DEVELOPMENT                          | 1.00 | 0.29 | 0 | 0 | 0 | not significant |
| 8787 | BEGUM_TARGETS_OF_PAX3_FOXP01_FUSION_UP                              | 1.01 | 0.38 | 0 | 0 | 0 | not significant |
| 8788 | CHR17Q21                                                            | 1.01 | 0.38 | 0 | 0 | 0 | not significant |
| 8789 | CHXP11                                                              | 1.01 | 0.38 | 0 | 0 | 0 | not significant |
| 8790 | GO_COAGULATION                                                      | 1.01 | 0.38 | 0 | 0 | 0 | not significant |
| 8791 | GO_NEURON_PROJECTION_TERMINUS                                       | 1.01 | 0.38 | 0 | 0 | 0 | not significant |
| 8792 | GO_PROTEIN_DEMETHYLATION                                            | 1.01 | 0.38 | 0 | 0 | 0 | not significant |
| 8793 | PASINI_SUZ12_TARGETS_DN                                             | 1.01 | 0.38 | 0 | 0 | 0 | not significant |
| 8794 | RADMACHER_AML_PROGNOSIS                                             | 1.01 | 0.38 | 0 | 0 | 0 | not significant |
| 8795 | GO_CELLULAR_RESPONSE_TO_INORGANIC_SUBSTANCE                         | 1.01 | 0.37 | 0 | 0 | 0 | not significant |
| 8796 | GO_OXIDOREDUCTASE_ACTIVITY_ACTING_ON_CH_OH_GROUP_OF_DONORS          | 1.01 | 0.37 | 0 | 0 | 0 | not significant |
| 8797 | GO_PHOSPHOLIPID_BINDING                                             | 1.01 | 0.37 | 0 | 0 | 0 | not significant |
| 8798 | GO_PHOSPHORIC_DIESTER_HYDROLASE_ACTIVITY                            | 1.01 | 0.37 | 0 | 0 | 0 | not significant |
| 8799 | HOEBEKE_LYMPHOID_STEM_CELL_UP                                       | 1.01 | 0.37 | 0 | 0 | 0 | not significant |
| 8800 | JNK_DN.V1_UP                                                        | 1.01 | 0.37 | 0 | 0 | 0 | not significant |
| 8801 | LI_INDUCED_T_TO_NATURAL_KILLER_DN                                   | 1.01 | 0.37 | 0 | 0 | 0 | not significant |
| 8802 | OXFORD_RALA_OR_RALB_TARGETS_UP                                      | 1.01 | 0.37 | 0 | 0 | 0 | not significant |
| 8803 | RB_DNV1_DN                                                          | 1.01 | 0.37 | 0 | 0 | 0 | not significant |
| 8804 | REACTOME_TRANSLESION_SYNTHESIS_BY_Y_FAMILY_DNA_POLYMERASES_BYPAS    | 1.01 | 0.37 | 0 | 0 | 0 | not significant |
| 8805 | CHR9Q34                                                             | 1.01 | 0.36 | 0 | 0 | 0 | not significant |
| 8806 | DEBIASI_APOPTOSIS_BY_REOVIRUS_INFECTION_DN                          | 1.01 | 0.36 | 0 | 0 | 0 | not significant |
| 8807 | GO_FATTY_ACID_BETA_OXIDATION                                        | 1.01 | 0.36 | 0 | 0 | 0 | not significant |
| 8808 | GO_MESONEPHROS_DEVELOPMENT                                          | 1.01 | 0.36 | 0 | 0 | 0 | not significant |
| 8809 | GO_RAB_GTPASE_BINDING                                               | 1.01 | 0.36 | 0 | 0 | 0 | not significant |
| 8810 | GO_REGULATION_OF_B_CELL_PROLIFERATION                               | 1.01 | 0.36 | 0 | 0 | 0 | not significant |
| 8811 | GO_REGULATION_OF_CYCLIN_DEPENDENT_PROTEIN_KINASE_ACTIVITY           | 1.01 | 0.36 | 0 | 0 | 0 | not significant |
| 8812 | GRAESSMANN_RESPONSE_TO_MC_AND_SERUM_DEPRIVATION_UP                  | 1.01 | 0.36 | 0 | 0 | 0 | not significant |
| 8813 | HAHTOLA_MYCOSIS_FUNGOIDES_SKIN_DN                                   | 1.01 | 0.36 | 0 | 0 | 0 | not significant |
| 8814 | PID_TELOMERASE_PATHWAY                                              | 1.01 | 0.36 | 0 | 0 | 0 | not significant |
| 8815 | PRC1_BMI1_UP.V1_DN                                                  | 1.01 | 0.36 | 0 | 0 | 0 | not significant |
| 8816 | PURBEY_TARGETS_OF_CTBP1_NOT_SATB1_DN                                | 1.01 | 0.36 | 0 | 0 | 0 | not significant |
| 8817 | REACTOME_IRE1ALPHA_ACTIVATES_CHAPERONES                             | 1.01 | 0.36 | 0 | 0 | 0 | not significant |

|      |                                                                    |      |      |   |   |   |                 |
|------|--------------------------------------------------------------------|------|------|---|---|---|-----------------|
| 8818 | ROSS_ACUTE_MYELOID_LEUKEMIA_CBF                                    | 1.01 | 0.36 | 0 | 0 | 0 | not significant |
| 8819 | BENNETT_SYSTEMIC_LUPUS_ERYTHEMATOSUS                               | 1.01 | 0.35 | 0 | 0 | 0 | not significant |
| 8820 | GO_EXONUCLEASE_ACTIVITY_ACTIVE_WITH_EITHER_RIBO_OR_DEOXYRIBONUCLEI | 1.01 | 0.35 | 0 | 0 | 0 | not significant |
| 8821 | GO_MHC_PROTEIN_BINDING                                             | 1.01 | 0.35 | 0 | 0 | 0 | not significant |
| 8822 | GO_NEGATIVE_REGULATION_OF_GENE_EXPRESSION_EPIGENETIC               | 1.01 | 0.35 | 0 | 0 | 0 | not significant |
| 8823 | GO_POSITIVE_REGULATION_OF_BIOSYNTHETIC_PROCESS                     | 1.01 | 0.35 | 0 | 0 | 0 | not significant |
| 8824 | GO_POSITIVE_REGULATION_OF_DEFENSE_RESPONSE_TO_VIRUS_BY_HOST        | 1.01 | 0.35 | 0 | 0 | 0 | not significant |
| 8825 | GO_POSITIVE_REGULATION_OF_HISTONE_METHYLATION                      | 1.01 | 0.35 | 0 | 0 | 0 | not significant |
| 8826 | GO_REGULATION_OF_CELLULAR_RESPONSE_TO_STRESS                       | 1.01 | 0.35 | 0 | 0 | 0 | not significant |
| 8827 | GO_REGULATION_OF_PEPTIDYL_TYROSINE_PHOSPHORYLATION                 | 1.01 | 0.35 | 0 | 0 | 0 | not significant |
| 8828 | GO_REPLICATION_FORK_PROCESSING                                     | 1.01 | 0.35 | 0 | 0 | 0 | not significant |
| 8829 | GO_VITAMIN_BIOSYNTHETIC_PROCESS                                    | 1.01 | 0.35 | 0 | 0 | 0 | not significant |
| 8830 | GO_XY_BODY                                                         | 1.01 | 0.35 | 0 | 0 | 0 | not significant |
| 8831 | HOLLEMAN_VINCRIKISTINE_RESISTANCE_B_ALL_UP                         | 1.01 | 0.35 | 0 | 0 | 0 | not significant |
| 8832 | LANDIS_ERBB2_BREAST_PRENEOPLASTIC_UP                               | 1.01 | 0.35 | 0 | 0 | 0 | not significant |
| 8833 | NAKAMURA_ADIPOGENESIS_EARLY_UP                                     | 1.01 | 0.35 | 0 | 0 | 0 | not significant |
| 8834 | REACTOME_DNA_DAMAGE_BYPASS                                         | 1.01 | 0.35 | 0 | 0 | 0 | not significant |
| 8835 | YAO_TEMPORAL_RESPONSE_TO_PROGESTERONE_CLUSTER_6                    | 1.01 | 0.35 | 0 | 0 | 0 | not significant |
| 8836 | AMIT_EGF_RESPONSE_240_MCF10A                                       | 1.01 | 0.34 | 0 | 0 | 0 | not significant |
| 8837 | BCAT_100_UP.V1_DN                                                  | 1.01 | 0.34 | 0 | 0 | 0 | not significant |
| 8838 | BRUECKNER_TARGETS_OF_MIRLET7A3_UP                                  | 1.01 | 0.34 | 0 | 0 | 0 | not significant |
| 8839 | CEBALLOS_TARGETS_OF_TP53_AND_MYC_UP                                | 1.01 | 0.34 | 0 | 0 | 0 | not significant |
| 8840 | GO_ENGULFMENT_OF_APOPTOTIC_CELL                                    | 1.01 | 0.34 | 0 | 0 | 0 | not significant |
| 8841 | GO_GOLGI_TO_LYSOSOME_TRANSPORT                                     | 1.01 | 0.34 | 0 | 0 | 0 | not significant |
| 8842 | GO_MANNOSYLATION                                                   | 1.01 | 0.34 | 0 | 0 | 0 | not significant |
| 8843 | GO_MONOVALENT_INORGANIC_ANION_HOMEOSTASIS                          | 1.01 | 0.34 | 0 | 0 | 0 | not significant |
| 8844 | GO_MULTICELLULAR_ORGANISMAL_HOMEOSTASIS                            | 1.01 | 0.34 | 0 | 0 | 0 | not significant |
| 8845 | GO_NEGATIVE_REGULATION_OF_LYMPHOCYTE_DIFFERENTIATION               | 1.01 | 0.34 | 0 | 0 | 0 | not significant |
| 8846 | GO_NEURON_PROJECTION                                               | 1.01 | 0.34 | 0 | 0 | 0 | not significant |
| 8847 | GO_POSITIVE_REGULATION_OF_GLIAL_CELL_PROLIFERATION                 | 1.01 | 0.34 | 0 | 0 | 0 | not significant |
| 8848 | GO_POSITIVE_REGULATION_OF_T_CELL_APOPTOTIC_PROCESS                 | 1.01 | 0.34 | 0 | 0 | 0 | not significant |
| 8849 | GO_REGULATION_OF_HISTONE_DEACETYLATION                             | 1.01 | 0.34 | 0 | 0 | 0 | not significant |
| 8850 | PIONTEK_PKD1_TARGETS_DN                                            | 1.01 | 0.34 | 0 | 0 | 0 | not significant |
| 8851 | REACTOME_SIGNALING_TO_RAS                                          | 1.01 | 0.34 | 0 | 0 | 0 | not significant |
| 8852 | XU_AKT1_TARGETS_6HR                                                | 1.01 | 0.34 | 0 | 0 | 0 | not significant |
| 8853 | BIOCARTA_TFF_PATHWAY                                               | 1.01 | 0.33 | 0 | 0 | 0 | not significant |
| 8854 | GO_AXONAL_FASCICULATION                                            | 1.01 | 0.33 | 0 | 0 | 0 | not significant |
| 8855 | GO_GAMMA_TUBULIN_COMPLEX                                           | 1.01 | 0.33 | 0 | 0 | 0 | not significant |
| 8856 | GO_INTERFERON_GAMMA_MEDIATED_SIGNALING_PATHWAY                     | 1.01 | 0.33 | 0 | 0 | 0 | not significant |
| 8857 | GO_POSITIVE_REGULATION_OF_LYMPHOCYTE_APOPTOTIC_PROCESS             | 1.01 | 0.33 | 0 | 0 | 0 | not significant |
| 8858 | GO_QUINONE_METABOLIC_PROCESS                                       | 1.01 | 0.33 | 0 | 0 | 0 | not significant |
| 8859 | KAMIKUBO_MYELOID_CEBPA_NETWORK                                     | 1.01 | 0.33 | 0 | 0 | 0 | not significant |
| 8860 | GARGALOVIC_RESPONSE_TO_OXIDIZED_PHOSPHOLIPIDS_GREY_UP              | 1.01 | 0.32 | 0 | 0 | 0 | not significant |
| 8861 | GO_AP_1_ADAPTOR_COMPLEX                                            | 1.01 | 0.32 | 0 | 0 | 0 | not significant |
| 8862 | GO_GLYCOGEN_GRANULE                                                | 1.01 | 0.32 | 0 | 0 | 0 | not significant |
| 8863 | GO_MACROPHAGE_CHEMOTAXIS                                           | 1.01 | 0.32 | 0 | 0 | 0 | not significant |
| 8864 | MUELLER_COMMON_TARGETS_OF_AML_FUSIONS_DN                           | 1.01 | 0.32 | 0 | 0 | 0 | not significant |
| 8865 | GO_ARGININE_CATABOLIC_PROCESS                                      | 1.01 | 0.31 | 0 | 0 | 0 | not significant |
| 8866 | GO_CELLULAR_RESPONSE_TO_LEUCINE_STARVATION                         | 1.01 | 0.31 | 0 | 0 | 0 | not significant |
| 8867 | KEGG_GLYCOPHINGOLIPID_BIOSYNTHESIS_LACTO_AND_NEOLACTO_SERIES       | 1.01 | 0.31 | 0 | 0 | 0 | not significant |
| 8868 | GO_DETECTION_OF_EXTERNAL_BIOTIC_STIMULUS                           | 1.01 | 0.3  | 0 | 0 | 0 | not significant |
| 8869 | GO_GLYCINE_METABOLIC_PROCESS                                       | 1.01 | 0.3  | 0 | 0 | 0 | not significant |
| 8870 | GO_REGULATION_OF_NEUROTROPHIN_TRK_RECEPTOR_SIGNALING_PATHWAY       | 1.01 | 0.3  | 0 | 0 | 0 | not significant |
| 8871 | MCGOWAN_RSP6_TARGETS_UP                                            | 1.01 | 0.3  | 0 | 0 | 0 | not significant |
| 8872 | REACTOME_ERBB2_REGULATES_CELL_MOTILITY                             | 1.01 | 0.3  | 0 | 0 | 0 | not significant |
| 8873 | BLALOCK_ALZHEIMERS_DISEASE_UP                                      | 1.02 | 0.41 | 0 | 0 | 0 | not significant |
| 8874 | FORTSCHEGGER_PHF8_TARGETS_DN                                       | 1.02 | 0.41 | 0 | 0 | 0 | not significant |
| 8875 | GO_ORGANONITROGEN_COMPOUND_BIOSYNTHETIC_PROCESS                    | 1.02 | 0.4  | 0 | 0 | 0 | not significant |
| 8876 | GO_REGULATION_OF_CELL_DEATH                                        | 1.02 | 0.4  | 0 | 0 | 0 | not significant |
| 8877 | GO_STRESS_ACTIVATED_PROTEIN_KINASE_SIGNALING_CASCADE               | 1.02 | 0.4  | 0 | 0 | 0 | not significant |
| 8878 | GRESHOCK_CANCER_COPY_NUMBER_UP                                     | 1.02 | 0.4  | 0 | 0 | 0 | not significant |
| 8879 | RODRIGUES_THYROID_CARINOMA_POORLY_DIFFERENTIATED_DN                | 1.02 | 0.4  | 0 | 0 | 0 | not significant |
| 8880 | GO_ACTIN_BASED_CELL_PROJECTION                                     | 1.02 | 0.39 | 0 | 0 | 0 | not significant |
| 8881 | GO_GLYCOSAMINOGLYCAN_BINDING                                       | 1.02 | 0.39 | 0 | 0 | 0 | not significant |
| 8882 | GO_MACROMOLECULE_DEACYLATION                                       | 1.02 | 0.39 | 0 | 0 | 0 | not significant |
| 8883 | GO_MULTICELLULAR_ORGANISM_REPRODUCTION                             | 1.02 | 0.39 | 0 | 0 | 0 | not significant |
| 8884 | GO_NEGATIVE_REGULATION_OF_CELL_DEATH                               | 1.02 | 0.39 | 0 | 0 | 0 | not significant |
| 8885 | GO_NEGATIVE_REGULATION_OF_SMALL_MOLECULE_METABOLIC_PROCESS         | 1.02 | 0.39 | 0 | 0 | 0 | not significant |
| 8886 | GO_REGULATION_OF_INSULIN_SECRETION                                 | 1.02 | 0.39 | 0 | 0 | 0 | not significant |
| 8887 | KEGG_JAK_STAT_SIGNALING_PATHWAY                                    | 1.02 | 0.39 | 0 | 0 | 0 | not significant |
| 8888 | SASSON_RESPONSE_TO_GONADOTROPHINS_UP                               | 1.02 | 0.39 | 0 | 0 | 0 | not significant |
| 8889 | SEIDEN_ONCOGENESIS_BY_MET                                          | 1.02 | 0.39 | 0 | 0 | 0 | not significant |
| 8890 | ALCALA_APOPTOSIS                                                   | 1.02 | 0.38 | 0 | 0 | 0 | not significant |
| 8891 | BAKKER_FOXO3_TARGETS_DN                                            | 1.02 | 0.38 | 0 | 0 | 0 | not significant |
| 8892 | BILANGES_RAPAMYCIN_SENSITIVE_VIA_TSC1_AND_TSC2                     | 1.02 | 0.38 | 0 | 0 | 0 | not significant |
| 8893 | BRACHAT_RESPONSE_TO_CISPLATIN                                      | 1.02 | 0.38 | 0 | 0 | 0 | not significant |
| 8894 | EGFR_UP.V1_DN                                                      | 1.02 | 0.38 | 0 | 0 | 0 | not significant |
| 8895 | GAZDA_DIAMOND_BLACKFAN_ANEMIA_ERYTHROID_DN                         | 1.02 | 0.38 | 0 | 0 | 0 | not significant |
| 8896 | GO_CLATHRIN_COATED_VESICLE                                         | 1.02 | 0.38 | 0 | 0 | 0 | not significant |
| 8897 | GO_INSULIN_SECRETION                                               | 1.02 | 0.38 | 0 | 0 | 0 | not significant |
| 8898 | GO_LYSOSOMAL_TRANSPORT                                             | 1.02 | 0.38 | 0 | 0 | 0 | not significant |
| 8899 | GO_POSITIVE_REGULATION_OF_AXONOGENESIS                             | 1.02 | 0.38 | 0 | 0 | 0 | not significant |
| 8900 | GO_PROTEIN_PHOSPHATASE_BINDING                                     | 1.02 | 0.38 | 0 | 0 | 0 | not significant |
| 8901 | GO_REGULATION_OF_MAPK_CASCADE                                      | 1.02 | 0.38 | 0 | 0 | 0 | not significant |
| 8902 | GO_RESPONSE_TO_CADMIUM_ION                                         | 1.02 | 0.38 | 0 | 0 | 0 | not significant |
| 8903 | GO_VACUOLAR_TRANSPORT                                              | 1.02 | 0.38 | 0 | 0 | 0 | not significant |
| 8904 | KEGG_BLADDER_CANCER                                                | 1.02 | 0.38 | 0 | 0 | 0 | not significant |
| 8905 | LABBE_TARGETS_OF_TGFB1_AND_WNT3A_UP                                | 1.02 | 0.38 | 0 | 0 | 0 | not significant |
| 8906 | LANDIS_ERBB2_BREAST_TUMORS_324_DN                                  | 1.02 | 0.38 | 0 | 0 | 0 | not significant |
| 8907 | AMIT_EGF_RESPONSE_120_HELA                                         | 1.02 | 0.37 | 0 | 0 | 0 | not significant |
| 8908 | AZARE NEOPLASTIC TRANSFORMATION BY STAT3 UP                        | 1.02 | 0.37 | 0 | 0 | 0 | not significant |
| 8909 | BANDRES_RESPONSE_TO_CARMUSTIN_WITHOUT_MGMT_48HR_DN                 | 1.02 | 0.37 | 0 | 0 | 0 | not significant |
| 8910 | BIOCARTA_KERATINOCYTE_PATHWAY                                      | 1.02 | 0.37 | 0 | 0 | 0 | not significant |
| 8911 | GO_ACIDIC_AMINO_ACID_TRANSPORT                                     | 1.02 | 0.37 | 0 | 0 | 0 | not significant |
| 8912 | GO_EXTRINSIC_APOPTOTIC_SIGNALING_PATHWAY                           | 1.02 | 0.37 | 0 | 0 | 0 | not significant |
| 8913 | GO_NEGATIVE_REGULATION_OF_DNA_REPAIR                               | 1.02 | 0.37 | 0 | 0 | 0 | not significant |
| 8914 | GO_POSITIVE_REGULATION_OF_NF_KAPPAB_TRANSCRIPTION_FACTOR_ACTIVITY  | 1.02 | 0.37 | 0 | 0 | 0 | not significant |
| 8915 | GO_RAS_PROTEIN_SIGNAL_TRANSDUCTION                                 | 1.02 | 0.37 | 0 | 0 | 0 | not significant |
| 8916 | GO_REGULATION_OF_PEPTIDE_HORMONE_SECRETION                         | 1.02 | 0.37 | 0 | 0 | 0 | not significant |
| 8917 | KYNG_ENVIRONMENTAL_STRESS_RESPONSE_NOT_BY_GAMMA_IN_OLD             | 1.02 | 0.37 | 0 | 0 | 0 | not significant |
| 8918 | SHETH_LIVER_CANCER_VS_TXNP_LOSS_PAM3                               | 1.02 | 0.37 | 0 | 0 | 0 | not significant |
| 8919 | SMIRNOV_RESPONSE_TO_IR_2HR_UP                                      | 1.02 | 0.37 | 0 | 0 | 0 | not significant |
| 8920 | VANHARANTA_UTERINE_FIBROID_UP                                      | 1.02 | 0.37 | 0 | 0 | 0 | not significant |
| 8921 | WANG_CLIM2_TARGETS_UP                                              | 1.02 | 0.37 | 0 | 0 | 0 | not significant |
| 8922 | GO_AMYLOID_BETA_METABOLIC_PROCESS                                  | 1.02 | 0.36 | 0 | 0 | 0 | not significant |
| 8923 | GO_EYE_PHOTORECEPTOR_CELL_DIFFERENTIATION                          | 1.02 | 0.36 | 0 | 0 | 0 | not significant |
| 8924 | GO_METANEPHRIC_NEPHRON_DEVELOPMENT                                 | 1.02 | 0.36 | 0 | 0 | 0 | not significant |
| 8925 | GO_MHC_CLASS_I_PROTEIN_BINDING                                     | 1.02 | 0.36 | 0 | 0 | 0 | not significant |
| 8926 | GO_MYOFILAMENT                                                     | 1.02 | 0.36 | 0 | 0 | 0 | not significant |

|      |                                                                   |      |      |   |   |   |                 |
|------|-------------------------------------------------------------------|------|------|---|---|---|-----------------|
| 8927 | GO_NEGATIVE_REGULATION_OF_AXON_GUIDANCE                           | 1.02 | 0.36 | 0 | 0 | 0 | not significant |
| 8928 | GO_NEGATIVE_REGULATION_OF_BLOOD_PRESSURE                          | 1.02 | 0.36 | 0 | 0 | 0 | not significant |
| 8929 | GO_POSTSYNAPSE_ORGANIZATION                                       | 1.02 | 0.36 | 0 | 0 | 0 | not significant |
| 8930 | GO_REGULATION_OF_PROGRAMMED_NECROTIC_CELL_DEATH                   | 1.02 | 0.36 | 0 | 0 | 0 | not significant |
| 8931 | GO_SINGLE_FERTILIZATION                                           | 1.02 | 0.36 | 0 | 0 | 0 | not significant |
| 8932 | GO_STEREOCILUM_BUNDLE                                             | 1.02 | 0.36 | 0 | 0 | 0 | not significant |
| 8933 | GO_TORC1_SIGNALING                                                | 1.02 | 0.36 | 0 | 0 | 0 | not significant |
| 8934 | KEGG_PROXIMAL_TUBULE_BICARBONATE_RECLAMATION                      | 1.02 | 0.36 | 0 | 0 | 0 | not significant |
| 8935 | PEART_HDAC_PROLIFERATION_CLUSTER_UP                               | 1.02 | 0.36 | 0 | 0 | 0 | not significant |
| 8936 | PRC1_BMI_LP.V1_UP                                                 | 1.02 | 0.36 | 0 | 0 | 0 | not significant |
| 8937 | REACTOME_SIGNALING_BY_FGFR1_IN_DISEASE                            | 1.02 | 0.36 | 0 | 0 | 0 | not significant |
| 8938 | REACTOME_SIGNALING_BY_PDGF                                        | 1.02 | 0.36 | 0 | 0 | 0 | not significant |
| 8939 | CAMP_UP.V1_DN                                                     | 1.02 | 0.35 | 0 | 0 | 0 | not significant |
| 8940 | GO_APOPTOTIC_CELL_CLEARANCE                                       | 1.02 | 0.35 | 0 | 0 | 0 | not significant |
| 8941 | GO_NEGATIVE_REGULATION_OF_OSSIFICATION                            | 1.02 | 0.35 | 0 | 0 | 0 | not significant |
| 8942 | GO_NEUTROPHIL_DIFFERENTIATION                                     | 1.02 | 0.35 | 0 | 0 | 0 | not significant |
| 8943 | GO_NUCLEOTIDE_RECEPTOR_ACTIVITY                                   | 1.02 | 0.35 | 0 | 0 | 0 | not significant |
| 8944 | GO_REGULATION_OF_PROTEIN_LOCALIZATION_TO_SYNAPSE                  | 1.02 | 0.35 | 0 | 0 | 0 | not significant |
| 8945 | DAIRKEE_CANCER_PRONE_RESPONSE_E2                                  | 1.02 | 0.34 | 0 | 0 | 0 | not significant |
| 8946 | GENTILE_UV_RESPONSE_CLUSTER_D1                                    | 1.02 | 0.34 | 0 | 0 | 0 | not significant |
| 8947 | GO_DNA_ENDOREDUPPLICATION                                         | 1.02 | 0.34 | 0 | 0 | 0 | not significant |
| 8948 | GO_ENDOSOME_LUMEN                                                 | 1.02 | 0.34 | 0 | 0 | 0 | not significant |
| 8949 | GO_EPITHELIAL_TUBE_BRANCHING_INVOLVED_IN_LUNG_MORPHOGENESIS       | 1.02 | 0.34 | 0 | 0 | 0 | not significant |
| 8950 | GO_FLAP_ENDONUCLEASE_ACTIVITY                                     | 1.02 | 0.34 | 0 | 0 | 0 | not significant |
| 8951 | GO_LEFT_RIGHT_AXIS_SPECIFICATION                                  | 1.02 | 0.34 | 0 | 0 | 0 | not significant |
| 8952 | GO_POSITIVE_REGULATION_OF_SPHINGOLIPID_BIOSYNTHETIC_PROCESS       | 1.02 | 0.34 | 0 | 0 | 0 | not significant |
| 8953 | GO_REGULATION_OF_MITOPHAGY                                        | 1.02 | 0.34 | 0 | 0 | 0 | not significant |
| 8954 | GO_VASCULAR_SMOOTH_MUSCLE_CONTRACTION                             | 1.02 | 0.34 | 0 | 0 | 0 | not significant |
| 8955 | GO_ZYMOGEN_GRANULE_MEMBRANE                                       | 1.02 | 0.34 | 0 | 0 | 0 | not significant |
| 8956 | KEGG_ETHER_LIPID_METABOLISM                                       | 1.02 | 0.34 | 0 | 0 | 0 | not significant |
| 8957 | GO_CELL_PROLIFERATION_INVOLVED_IN_METANEPHROS_DEVELOPMENT         | 1.02 | 0.33 | 0 | 0 | 0 | not significant |
| 8958 | GO_DERLIN_1_RETROTANSLOCATION_COMPLEX                             | 1.02 | 0.33 | 0 | 0 | 0 | not significant |
| 8959 | GO_HMG_BOX_DOMAIN_BINDING                                         | 1.02 | 0.33 | 0 | 0 | 0 | not significant |
| 8960 | GO_MEIOTIC_TELOMERE_CLUSTERING                                    | 1.02 | 0.33 | 0 | 0 | 0 | not significant |
| 8961 | GO_NEGATIVE_REGULATION_OF_NEUROTRANSMITTER_SECRETION              | 1.02 | 0.33 | 0 | 0 | 0 | not significant |
| 8962 | GO_REGULATION_OF_GASTRIC_ACID_SECRETION                           | 1.02 | 0.33 | 0 | 0 | 0 | not significant |
| 8963 | GO_COPI_COATED_VESICLE_BUDDING                                    | 1.02 | 0.32 | 0 | 0 | 0 | not significant |
| 8964 | GO_PLASMA_MEMBRANE_TO_ENDOSOME_TRANSPORT                          | 1.02 | 0.32 | 0 | 0 | 0 | not significant |
| 8965 | GO_RNA_POLYMERASE_II_CTD_HEPTAPEPTIDE_REPEAT_PHOSPHATASE_ACTIVITY | 1.02 | 0.32 | 0 | 0 | 0 | not significant |
| 8966 | MIKKELSEN_MCV6_LCP_WITH_H3K27ME3                                  | 1.02 | 0.32 | 0 | 0 | 0 | not significant |
| 8967 | ROY_WOUND_BLOOD_VESSEL_DN                                         | 1.02 | 0.32 | 0 | 0 | 0 | not significant |
| 8968 | GO_PROTEIN_MATURATION_BY_IRON_SULFUR_CLUSTER_TRANSFER             | 1.02 | 0.31 | 0 | 0 | 0 | not significant |
| 8969 | GO_REGULATION_OF_CHAPERONE_MEDIATED_AUTOPHAGY                     | 1.02 | 0.31 | 0 | 0 | 0 | not significant |
| 8970 | GO_REGULATION_OF_DNA_DEMETHYLATION                                | 1.02 | 0.31 | 0 | 0 | 0 | not significant |
| 8971 | GO_REGULATION_OF_TAU_PROTEIN_KINASE_ACTIVITY                      | 1.02 | 0.31 | 0 | 0 | 0 | not significant |
| 8972 | GO_THYROID_HORMONE_METABOLIC_PROCESS                              | 1.02 | 0.31 | 0 | 0 | 0 | not significant |
| 8973 | MINGUEZ_LIVER_CANCER_VASCULAR_INVASION_DN                         | 1.02 | 0.31 | 0 | 0 | 0 | not significant |
| 8974 | GO_POSITIVE_REGULATION_OF_PINOCYTOSIS                             | 1.02 | 0.29 | 0 | 0 | 0 | not significant |
| 8975 | LIN_MELANOMA_COPY_NUMBER_UP                                       | 1.03 | 0.43 | 0 | 0 | 0 | not significant |
| 8976 | ONKEN_UVEAL_MELANOMA_UP                                           | 1.03 | 0.43 | 0 | 0 | 0 | not significant |
| 8977 | GO_SENSORY_PERCEPTION                                             | 1.03 | 0.42 | 0 | 0 | 0 | not significant |
| 8978 | GO_TRANSMEMBRANE_RECEPTOR_PROTEIN_TYROSINE_KINASE_SIGNALING_PATH  | 1.03 | 0.42 | 0 | 0 | 0 | not significant |
| 8979 | YOSHIMURA_MAPK8_TARGETS_UP                                        | 1.03 | 0.42 | 0 | 0 | 0 | not significant |
| 8980 | AMUNDSON_POOR_SURVIVAL_AFTER_GAMMA_RADIATION_2G                   | 1.03 | 0.41 | 0 | 0 | 0 | not significant |
| 8981 | GO_B_CELL_PROLIFERATION                                           | 1.03 | 0.41 | 0 | 0 | 0 | not significant |
| 8982 | GO_CELL_PART_MORPHOGENESIS                                        | 1.03 | 0.41 | 0 | 0 | 0 | not significant |
| 8983 | GO_REGULATION_OF_HISTONE_METHYLATION                              | 1.03 | 0.41 | 0 | 0 | 0 | not significant |
| 8984 | GO_TRANSCRIPTION_FACTOR_COMPLEX                                   | 1.03 | 0.41 | 0 | 0 | 0 | not significant |
| 8985 | BIDUS_METASTASIS_DN                                               | 1.03 | 0.4  | 0 | 0 | 0 | not significant |
| 8986 | CONCANNON_APOPTOSIS_BY_EPOXOMICIN_LP                              | 1.03 | 0.4  | 0 | 0 | 0 | not significant |
| 8987 | FLECHNER_PBL_KIDNEY_TRANSPLANT_OK_VS_DONOR_DN                     | 1.03 | 0.4  | 0 | 0 | 0 | not significant |
| 8988 | GO_3_5_EXONUCLEASE_ACTIVITY                                       | 1.03 | 0.4  | 0 | 0 | 0 | not significant |
| 8989 | GO_APICAL_PART_OF_CELL                                            | 1.03 | 0.4  | 0 | 0 | 0 | not significant |
| 8990 | GO_REGULATION_OF_CELL_SIZE                                        | 1.03 | 0.4  | 0 | 0 | 0 | not significant |
| 8991 | GO_TRANSPORT_VESICLE_MEMBRANE                                     | 1.03 | 0.4  | 0 | 0 | 0 | not significant |
| 8992 | GO_WATER_SOLUBLE_VITAMIN_METABOLIC_PROCESS                        | 1.03 | 0.4  | 0 | 0 | 0 | not significant |
| 8993 | NIKOLSKY_BREAST_CANCER_20Q12_Q13_AMPLICON                         | 1.03 | 0.4  | 0 | 0 | 0 | not significant |
| 8994 | TOOKER_GEMCITABINE_RESISTANCE_DN                                  | 1.03 | 0.4  | 0 | 0 | 0 | not significant |
| 8995 | WELCSH_BRCA1_TARGETS_UP                                           | 1.03 | 0.4  | 0 | 0 | 0 | not significant |
| 8996 | GO_DICARBOXYLIC_ACID_TRANSPORT                                    | 1.03 | 0.39 | 0 | 0 | 0 | not significant |
| 8997 | GO_GLIAL_CELL_DEVELOPMENT                                         | 1.03 | 0.39 | 0 | 0 | 0 | not significant |
| 8998 | GO_PHOSPHATIDYLINOSITOL_3_4_5_TRISPHOSPHATE_BINDING               | 1.03 | 0.39 | 0 | 0 | 0 | not significant |
| 8999 | GO_RECEPTOR_REGULATOR_ACTIVITY                                    | 1.03 | 0.39 | 0 | 0 | 0 | not significant |
| 9000 | GO_REGULATION_OF_DNA_REPAIR                                       | 1.03 | 0.39 | 0 | 0 | 0 | not significant |
| 9001 | GO_RESPONSE_TO_IONIZING_RADIATION                                 | 1.03 | 0.39 | 0 | 0 | 0 | not significant |
| 9002 | GO_SULFUR_COMPOUND_TRANSPORT                                      | 1.03 | 0.39 | 0 | 0 | 0 | not significant |
| 9003 | GO_TRANSFERASE_ACTIVITY_TRANSFERRING_SULFUR_CONTAINING_GROUPS     | 1.03 | 0.39 | 0 | 0 | 0 | not significant |
| 9004 | LEIN_MEDULLA_MARKERS                                              | 1.03 | 0.39 | 0 | 0 | 0 | not significant |
| 9005 | PID_AVB3_INTEGRIN_PATHWAY                                         | 1.03 | 0.39 | 0 | 0 | 0 | not significant |
| 9006 | BROWNE_HCMV_INFECTION_16HR_DN                                     | 1.03 | 0.38 | 0 | 0 | 0 | not significant |
| 9007 | GO_ACTIN_MEDIATED_CELL_CONTRACTION                                | 1.03 | 0.38 | 0 | 0 | 0 | not significant |
| 9008 | GO_BIOMINERAL_TISSUE_DEVELOPMENT                                  | 1.03 | 0.38 | 0 | 0 | 0 | not significant |
| 9009 | GO_CELL_CELL_JUNCTION_ASSEMBLY                                    | 1.03 | 0.38 | 0 | 0 | 0 | not significant |
| 9010 | GO_NEGATIVE_CHEMOTAXIS                                            | 1.03 | 0.38 | 0 | 0 | 0 | not significant |
| 9011 | GO_PHOSPHATIDYLINOSITOL_3_KINASE_SIGNALING                        | 1.03 | 0.38 | 0 | 0 | 0 | not significant |
| 9012 | GO_POSITIVE_REGULATION_OF_TRANSCRIPTION_REGULATORY_REGION_DNA_BIN | 1.03 | 0.38 | 0 | 0 | 0 | not significant |
| 9013 | GO_POSTSYNAPTIC_MEMBRANE_ORGANIZATION                             | 1.03 | 0.38 | 0 | 0 | 0 | not significant |
| 9014 | GO_REGULATION_OF_FATTY_ACID_OXIDATION                             | 1.03 | 0.38 | 0 | 0 | 0 | not significant |
| 9015 | GO_REGULATION_OF_HISTONE_H3_K4_METHYLATION                        | 1.03 | 0.38 | 0 | 0 | 0 | not significant |
| 9016 | GO_VENTRICULAR_SEPTUM_MORPHOGENESIS                               | 1.03 | 0.38 | 0 | 0 | 0 | not significant |
| 9017 | IZADPANAH_STEM_CELL_ADIPOSE_VS_BONE_DN                            | 1.03 | 0.38 | 0 | 0 | 0 | not significant |
| 9018 | LABBE_TGFB1_TARGETS_UP                                            | 1.03 | 0.38 | 0 | 0 | 0 | not significant |
| 9019 | PRC2_EED_UP.V1_UP                                                 | 1.03 | 0.38 | 0 | 0 | 0 | not significant |
| 9020 | STEIN_ESRRA_TARGETS_RESPONSIVE_TO_ESTROGEN_DN                     | 1.03 | 0.38 | 0 | 0 | 0 | not significant |
| 9021 | WNT_UP.V1_DN                                                      | 1.03 | 0.38 | 0 | 0 | 0 | not significant |
| 9022 | GHO_ATF5_TARGETS_DN                                               | 1.03 | 0.37 | 0 | 0 | 0 | not significant |
| 9023 | GO_AORTIC_VALVE_DEVELOPMENT                                       | 1.03 | 0.37 | 0 | 0 | 0 | not significant |
| 9024 | GO_CHONDROITIN_SULFATE_PROTEOGLYCAN_METABOLIC_PROCESS             | 1.03 | 0.37 | 0 | 0 | 0 | not significant |
| 9025 | GO_COCHLEA_DEVELOPMENT                                            | 1.03 | 0.37 | 0 | 0 | 0 | not significant |
| 9026 | GO_KIDNEY_MORPHOGENESIS                                           | 1.03 | 0.37 | 0 | 0 | 0 | not significant |
| 9027 | GO_PROTEIN_PALMITOYLATION                                         | 1.03 | 0.37 | 0 | 0 | 0 | not significant |
| 9028 | GO_REGULATION_OF_TRANSLATION_IN_RESPONSE_TO_STRESS                | 1.03 | 0.37 | 0 | 0 | 0 | not significant |
| 9029 | GYORFFY_MITOXANTHONE_RESISTANCE                                   | 1.03 | 0.37 | 0 | 0 | 0 | not significant |
| 9030 | KIM_BIPOLAR_DISORDER_OLIGODENDROCYTE_DENSITY_CORR_DN              | 1.03 | 0.37 | 0 | 0 | 0 | not significant |
| 9031 | LIANG_SILENCED_BY_METHYLATION_2                                   | 1.03 | 0.37 | 0 | 0 | 0 | not significant |
| 9032 | REACTOME_RHO_GTPASES_ACTIVATE_NADPH_OXIDASES                      | 1.03 | 0.37 | 0 | 0 | 0 | not significant |
| 9033 | VERRECCHIA_EARLY_RESPONSE_TO_TGFB1                                | 1.03 | 0.37 | 0 | 0 | 0 | not significant |
| 9034 | YAO_TEMPORAL_RESPONSE_TO_PROGESTERONE_CLUSTER_15                  | 1.03 | 0.37 | 0 | 0 | 0 | not significant |
| 9035 | DAZARD_UV_RESPONSE_CLUSTER_G28                                    | 1.03 | 0.36 | 0 | 0 | 0 | not significant |

|      |                                                                   |      |      |   |   |   |                 |
|------|-------------------------------------------------------------------|------|------|---|---|---|-----------------|
| 9036 | DING_LUNG_CANCER_BY_MUTATION_RATE                                 | 1.03 | 0.36 | 0 | 0 | 0 | not significant |
| 9037 | DOANE_BREAST_CANCER_ESR1_UP                                       | 1.03 | 0.36 | 0 | 0 | 0 | not significant |
| 9038 | GO_FICOLIN_1_RICH_GRANULE_MEMBRANE                                | 1.03 | 0.36 | 0 | 0 | 0 | not significant |
| 9039 | GO_NEGATIVE_REGULATION_OF_ACTIN_FILAMENT_DEPOLYMERIZATION         | 1.03 | 0.36 | 0 | 0 | 0 | not significant |
| 9040 | GO_NEGATIVE_REGULATION_OF_JUN_KINASE_ACTIVITY                     | 1.03 | 0.36 | 0 | 0 | 0 | not significant |
| 9041 | GO_POSITIVE_REGULATION_OF_CELLULAR_EXTRAVASATION                  | 1.03 | 0.36 | 0 | 0 | 0 | not significant |
| 9042 | GO_PROTEIN_K11_LINKED_DEUBIQUITINATION                            | 1.03 | 0.36 | 0 | 0 | 0 | not significant |
| 9043 | GO_REGULATION_OF_PROTEIN_LOCALIZATION_TO_ENDOSOME                 | 1.03 | 0.36 | 0 | 0 | 0 | not significant |
| 9044 | GO_TRICARBOXYLIC_ACID_METABOLIC_PROCESS                           | 1.03 | 0.36 | 0 | 0 | 0 | not significant |
| 9045 | WONG_IFNA2_RESISTANCE_UP                                          | 1.03 | 0.36 | 0 | 0 | 0 | not significant |
| 9046 | DORN_ADENOVIRUS_INFECTION_48HR_UP                                 | 1.03 | 0.35 | 0 | 0 | 0 | not significant |
| 9047 | GO_ACTIVATION_OF_CYSSTEINE_TYPE_ENDOPEPTIDASE_ACTIVITY            | 1.03 | 0.35 | 0 | 0 | 0 | not significant |
| 9048 | GO_MICROTUBULE_MINUS_END_BINDING                                  | 1.03 | 0.35 | 0 | 0 | 0 | not significant |
| 9049 | GO_NEGATIVE_REGULATION_OF_ORGANIC_ACID_TRANSPORT                  | 1.03 | 0.35 | 0 | 0 | 0 | not significant |
| 9050 | LIN_TUMOR_ESCAPE_FROM_IMMUNE_ATTACK                               | 1.03 | 0.35 | 0 | 0 | 0 | not significant |
| 9051 | FARMER_BREAST_CANCER_CLUSTER_6                                    | 1.03 | 0.34 | 0 | 0 | 0 | not significant |
| 9052 | GO_GOLGI_MEDIAL_CISTERNA                                          | 1.03 | 0.34 | 0 | 0 | 0 | not significant |
| 9053 | GO_NEURAL_PLATE_DEVELOPMENT                                       | 1.03 | 0.34 | 0 | 0 | 0 | not significant |
| 9054 | GO_ORIGIN_RECOGNITION_COMPLEX                                     | 1.03 | 0.34 | 0 | 0 | 0 | not significant |
| 9055 | GO_PHAGOPHORE_ASSEMBLY_SITE_MEMBRANE                              | 1.03 | 0.34 | 0 | 0 | 0 | not significant |
| 9056 | GO_POSITIVE_REGULATION_OF_VOLTAGE_GATED_POTASSIUM_CHANNEL_ACTIVTY | 1.03 | 0.34 | 0 | 0 | 0 | not significant |
| 9057 | GO_REGULATION_OF_POSTSYNAPTIC_DENSITY_ORGANIZATION                | 1.03 | 0.34 | 0 | 0 | 0 | not significant |
| 9058 | REACTOME_TRAFFICKING_AND_PROCESSING_OF_ENDOSOMAL_TLR              | 1.03 | 0.34 | 0 | 0 | 0 | not significant |
| 9059 | GO_HISTONE_H3_K27_DEMETHYLATION                                   | 1.03 | 0.33 | 0 | 0 | 0 | not significant |
| 9060 | GO_HYDROGEN_PEROXIDE_METABOLIC_PROCESS                            | 1.03 | 0.33 | 0 | 0 | 0 | not significant |
| 9061 | GO_ORGANIC_HYDROXY_COMPOUND_TRANSMEMBRANE_TRANSPORTER_ACTIVITY    | 1.03 | 0.33 | 0 | 0 | 0 | not significant |
| 9062 | GO_PEPTIDYL_PROLINE_HYDROXYLATION                                 | 1.03 | 0.33 | 0 | 0 | 0 | not significant |
| 9063 | GO_POSITIVE_REGULATION_OF_MITOPHAGY                               | 1.03 | 0.33 | 0 | 0 | 0 | not significant |
| 9064 | GO_POSITIVE_REGULATION_OF_TOLL_LIKE_RECEPTOR_3_SIGNALING_PATHWAY  | 1.03 | 0.33 | 0 | 0 | 0 | not significant |
| 9065 | GO_BLOOD_VESSEL_ENDOTHELIAL_CELL_PROLIFERATION_INVOLVED_IN_SPROUT | 1.03 | 0.32 | 0 | 0 | 0 | not significant |
| 9066 | GO_LIPOPROTEIN_LOCALIZATION                                       | 1.03 | 0.32 | 0 | 0 | 0 | not significant |
| 9067 | GO_NAD_P_H_OXIDASE_ACTIVITY                                       | 1.03 | 0.32 | 0 | 0 | 0 | not significant |
| 9068 | GO_VITAMIN_D_BIOSYNTHETIC_PROCESS                                 | 1.03 | 0.32 | 0 | 0 | 0 | not significant |
| 9069 | CHR16Q11                                                          | 1.03 | 0.31 | 0 | 0 | 0 | not significant |
| 9070 | GO_REGULATION_OF_PINOCYTOSIS                                      | 1.03 | 0.31 | 0 | 0 | 0 | not significant |
| 9071 | GO_POSITIVE_REGULATION_OF_SIGNALING                               | 1.04 | 0.48 | 0 | 0 | 0 | not significant |
| 9072 | GO_NEGATIVE_REGULATION_OF_RESPONSE_TO_STIMULUS                    | 1.04 | 0.47 | 0 | 0 | 0 | not significant |
| 9073 | MASSARWEH_TAMOXIFEN_RESISTANCE_UP                                 | 1.04 | 0.47 | 0 | 0 | 0 | not significant |
| 9074 | GO_ENZYME_LINKED_RECEPTOR_PROTEIN_SIGNALING_PATHWAY               | 1.04 | 0.46 | 0 | 0 | 0 | not significant |
| 9075 | GO_PROTEIN_DIMERIZATION_ACTIVITY                                  | 1.04 | 0.45 | 0 | 0 | 0 | not significant |
| 9076 | GO_REGULATION_OF_PROTEIN_SERINE_THREONINE_KINASE_ACTIVITY         | 1.04 | 0.45 | 0 | 0 | 0 | not significant |
| 9077 | GO_NEGATIVE_REGULATION_OF_CELL_POPULATION_PROLIFERATION           | 1.04 | 0.44 | 0 | 0 | 0 | not significant |
| 9078 | BIOCARTA_GPCR_PATHWAY                                             | 1.04 | 0.43 | 0 | 0 | 0 | not significant |
| 9079 | GO_CELLULAR_CARBOHYDRATE_METABOLIC_PROCESS                        | 1.04 | 0.43 | 0 | 0 | 0 | not significant |
| 9080 | GO_MICROBODY                                                      | 1.04 | 0.43 | 0 | 0 | 0 | not significant |
| 9081 | GO_NEGATIVE_REGULATION_OF_CELL_DIFFERENTIATION                    | 1.04 | 0.43 | 0 | 0 | 0 | not significant |
| 9082 | HOSHIDA_LIVER_CANCER_SUBCLASS_S1                                  | 1.04 | 0.43 | 0 | 0 | 0 | not significant |
| 9083 | ZWANG_DOWN_BY_2ND_EGF_PULSE                                       | 1.04 | 0.43 | 0 | 0 | 0 | not significant |
| 9084 | GO_CELLULAR_RESPONSE_TO_INSULIN_STIMULUS                          | 1.04 | 0.42 | 0 | 0 | 0 | not significant |
| 9085 | GO_EARLY_ENDOSOME_MEMBRANE                                        | 1.04 | 0.42 | 0 | 0 | 0 | not significant |
| 9086 | GO_ENDOPEPTIDASE_ACTIVITY                                         | 1.04 | 0.42 | 0 | 0 | 0 | not significant |
| 9087 | GO_LIPID_OXIDATION                                                | 1.04 | 0.42 | 0 | 0 | 0 | not significant |
| 9088 | GO_MACROAUTOPHAGY                                                 | 1.04 | 0.42 | 0 | 0 | 0 | not significant |
| 9089 | GO_MUSCLE_TISSUE_DEVELOPMENT                                      | 1.04 | 0.42 | 0 | 0 | 0 | not significant |
| 9090 | GO_SIGNAL_TRANSDUCTION_BY_P53_CLASS_MEDIATOR                      | 1.04 | 0.42 | 0 | 0 | 0 | not significant |
| 9091 | GO_SOMATIC_DIVERSIFICATION_OF_IMMUNE_RECEPTORS                    | 1.04 | 0.42 | 0 | 0 | 0 | not significant |
| 9092 | GROSS_HYPOXIA_VIA_HIF1A_DN                                        | 1.04 | 0.42 | 0 | 0 | 0 | not significant |
| 9093 | HALLMARK_P53_PATHWAY                                              | 1.04 | 0.42 | 0 | 0 | 0 | not significant |
| 9094 | HOFMANN_CELL_LYMPHOMA_UP                                          | 1.04 | 0.42 | 0 | 0 | 0 | not significant |
| 9095 | IWANAGA_CARCIINOGENESIS_BY_KRAS_DN                                | 1.04 | 0.42 | 0 | 0 | 0 | not significant |
| 9096 | MEK_UP_V1_DN                                                      | 1.04 | 0.42 | 0 | 0 | 0 | not significant |
| 9097 | NAKAMURA_ADIPOGENESIS_LATE_UP                                     | 1.04 | 0.42 | 0 | 0 | 0 | not significant |
| 9098 | BIOCARTA_FCER1_PATHWAY                                            | 1.04 | 0.41 | 0 | 0 | 0 | not significant |
| 9099 | GO_DIVALENT_INORGANIC_CATION_TRANSPORT                            | 1.04 | 0.41 | 0 | 0 | 0 | not significant |
| 9100 | GO_POSITIVE_REGULATION_OF_REGULATED_SECRETORY_PATHWAY             | 1.04 | 0.41 | 0 | 0 | 0 | not significant |
| 9101 | GO_PROMOTER_SPECIFIC_CHROMATIN_BINDING                            | 1.04 | 0.41 | 0 | 0 | 0 | not significant |
| 9102 | HALLMARK_INFLAMMATORY_RESPONSE                                    | 1.04 | 0.41 | 0 | 0 | 0 | not significant |
| 9103 | THEILGAARD_NEUTROPHIL_AT_SKIN_WOUND_UP                            | 1.04 | 0.41 | 0 | 0 | 0 | not significant |
| 9104 | ABBUD_LIF_SIGNALING_1_DN                                          | 1.04 | 0.4  | 0 | 0 | 0 | not significant |
| 9105 | CAVARD_LIVER_CANCER_MALIGNANT_VS_BENIGN                           | 1.04 | 0.4  | 0 | 0 | 0 | not significant |
| 9106 | GO_COATED_VESICLE_MEMBRANE                                        | 1.04 | 0.4  | 0 | 0 | 0 | not significant |
| 9107 | GO_ENDODEOXYRIBONUCLEASE_ACTIVITY_PRODUCING_5_PHOSPHOMONOESTER:   | 1.04 | 0.4  | 0 | 0 | 0 | not significant |
| 9108 | GO_ENTRY_INTO_OTHER_ORGANISM_INVOLVED_IN_SYMBIOTIC_INTERACTION    | 1.04 | 0.4  | 0 | 0 | 0 | not significant |
| 9109 | GO_ESTABLISHMENT_OF_PROTEIN_LOCALIZATION_TO_ENDOPLASMIC_RETICULUM | 1.04 | 0.4  | 0 | 0 | 0 | not significant |
| 9110 | HALLMARK_HEDGEHOG_SIGNALING                                       | 1.04 | 0.4  | 0 | 0 | 0 | not significant |
| 9111 | HALLMARK_TGF_BETA_SIGNALING                                       | 1.04 | 0.4  | 0 | 0 | 0 | not significant |
| 9112 | KLEIN_PRIMARY_EFFUSION_LYMPHOMA_UP                                | 1.04 | 0.4  | 0 | 0 | 0 | not significant |
| 9113 | MODY_HIPPOCAMPUS_POSTNATAL                                        | 1.04 | 0.4  | 0 | 0 | 0 | not significant |
| 9114 | MUNSHI_MULTIPLE_MYELOMA_UP                                        | 1.04 | 0.4  | 0 | 0 | 0 | not significant |
| 9115 | BRACHAT_RESPONSE_TO_METHOTREXATE_DN                               | 1.04 | 0.39 | 0 | 0 | 0 | not significant |
| 9116 | DARWICHE_PAPILLOMA_PROGRESSION_RISK                               | 1.04 | 0.39 | 0 | 0 | 0 | not significant |
| 9117 | GO_ACTIVATION_OF_MAPK_ACTIVITY                                    | 1.04 | 0.39 | 0 | 0 | 0 | not significant |
| 9118 | GO_DIOL_BIOSYNTHETIC_PROCESS                                      | 1.04 | 0.39 | 0 | 0 | 0 | not significant |
| 9119 | GO_ESC_E_Z_COMPLEX                                                | 1.04 | 0.39 | 0 | 0 | 0 | not significant |
| 9120 | GO_NEGATIVE_REGULATION_OF_FIBROBLAST_PROLIFERATION                | 1.04 | 0.39 | 0 | 0 | 0 | not significant |
| 9121 | GO_POSITIVE_REGULATION_OF_SKELETAL_MUSCLE_TISSUE_DEVELOPMENT      | 1.04 | 0.39 | 0 | 0 | 0 | not significant |
| 9122 | GO_REGULATION_OF_CELL_CYCLE_CHECKPOINT                            | 1.04 | 0.39 | 0 | 0 | 0 | not significant |
| 9123 | GO_REGULATION_OF_PHOSPHOLIPASE_ACTIVITY                           | 1.04 | 0.39 | 0 | 0 | 0 | not significant |
| 9124 | GO_REGULATION_OF_RESPONSE_TO_OXIDATIVE_STRESS                     | 1.04 | 0.39 | 0 | 0 | 0 | not significant |
| 9125 | PID_IL3_PATHWAY                                                   | 1.04 | 0.39 | 0 | 0 | 0 | not significant |
| 9126 | SCHRAMM_INHBA_TARGETS_DN                                          | 1.04 | 0.39 | 0 | 0 | 0 | not significant |
| 9127 | SUBTIL_PROGESTIN_TARGETS                                          | 1.04 | 0.39 | 0 | 0 | 0 | not significant |
| 9128 | CHARAFE_BREAST_CANCER_BASAL_VS_MESENCHYMAL_DN                     | 1.04 | 0.38 | 0 | 0 | 0 | not significant |
| 9129 | CHR4Q25                                                           | 1.04 | 0.38 | 0 | 0 | 0 | not significant |
| 9130 | GO_CARBOXY_LYASE_ACTIVITY                                         | 1.04 | 0.38 | 0 | 0 | 0 | not significant |
| 9131 | GO_DICARBOXYLIC_ACID_CATABOLIC_PROCESS                            | 1.04 | 0.38 | 0 | 0 | 0 | not significant |
| 9132 | GO_ENDOTHELIAL_CELL_DEVELOPMENT                                   | 1.04 | 0.38 | 0 | 0 | 0 | not significant |
| 9133 | GO_EXOPEPTIDASE_ACTIVITY                                          | 1.04 | 0.38 | 0 | 0 | 0 | not significant |
| 9134 | GO_NEGATIVE_REGULATION_OF_T_CELL_RECEPTOR_SIGNALING_PATHWAY       | 1.04 | 0.38 | 0 | 0 | 0 | not significant |
| 9135 | GO_PLATELET_ALPHA_GRANULE                                         | 1.04 | 0.38 | 0 | 0 | 0 | not significant |
| 9136 | GO_VIRAL_BUDDING                                                  | 1.04 | 0.38 | 0 | 0 | 0 | not significant |
| 9137 | MOREIRA_RESPONSE_TO_TSA_DN                                        | 1.04 | 0.38 | 0 | 0 | 0 | not significant |
| 9138 | POS_HISTAMINE_RESPONSE_NETWORK                                    | 1.04 | 0.38 | 0 | 0 | 0 | not significant |
| 9139 | YANG_BREAST_CANCER_ESR1_LASER_UP                                  | 1.04 | 0.38 | 0 | 0 | 0 | not significant |
| 9140 | GO_LIGAND_GATED_CALCIIUM_CHANNEL_ACTIVITY                         | 1.04 | 0.37 | 0 | 0 | 0 | not significant |
| 9141 | GO_NEGATIVE_REGULATION_OF_RECEPTOR_INTERNALIZATION                | 1.04 | 0.37 | 0 | 0 | 0 | not significant |
| 9142 | MALONEY_RESPONSE_TO_17AAG_UP                                      | 1.04 | 0.37 | 0 | 0 | 0 | not significant |
| 9143 | REACTOME_COENZYME_A_BIOSYNTHESIS                                  | 1.04 | 0.37 | 0 | 0 | 0 | not significant |
| 9144 | SINGH_KRAS_DEPENDENCY_SIGNATURE                                   | 1.04 | 0.37 | 0 | 0 | 0 | not significant |



|      |                                                                     |      |      |   |   |   |                 |
|------|---------------------------------------------------------------------|------|------|---|---|---|-----------------|
| 9145 | GO_NEGATIVE_REGULATION_OF_MACROPHAGE_DERIVED_FOAM_CELL_DIFFEREN     | 1.04 | 0.36 | 0 | 0 | 0 | not significant |
| 9146 | GO_SYNAPTIC_VESICLE_PRIMING                                         | 1.04 | 0.36 | 0 | 0 | 0 | not significant |
| 9147 | GO_UNCONVENTIONAL_MYOSIN_COMPLEX                                    | 1.04 | 0.36 | 0 | 0 | 0 | not significant |
| 9148 | MCBRYAN_PUBERTAL_BREAST_3_4WK_DN                                    | 1.04 | 0.36 | 0 | 0 | 0 | not significant |
| 9149 | REACTOME_CASPASE_ACTIVATION_VIA_DEATH_RECEPTORS_IN_THE_PRESENCE_I   | 1.04 | 0.36 | 0 | 0 | 0 | not significant |
| 9150 | GO_CD95_DEATH_INDUCING_SIGNALING_COMPLEX                            | 1.04 | 0.35 | 0 | 0 | 0 | not significant |
| 9151 | GO_INOSITOL_1_4_5_TRISPHOSPHATE_BINDING                             | 1.04 | 0.35 | 0 | 0 | 0 | not significant |
| 9152 | GO_NEGATIVE_REGULATION_OF_EPITHELIAL_CELL_PROLIFERATION_INVOLVED_IN | 1.04 | 0.35 | 0 | 0 | 0 | not significant |
| 9153 | GO_SENSORY_PERCEPTION_OF_BITTER_TASTE                               | 1.04 | 0.35 | 0 | 0 | 0 | not significant |
| 9154 | GO_REGULATION_OF_SKELETAL_MUSCLE_FIBER_DEVELOPMENT                  | 1.04 | 0.33 | 0 | 0 | 0 | not significant |
| 9155 | REACTOME_ACYL_CHAIN_REMODELING_OF_CL                                | 1.04 | 0.33 | 0 | 0 | 0 | not significant |
| 9156 | GO_HOLLIDAY_JUNCTION_RESOLVASE_COMPLEX                              | 1.04 | 0.32 | 0 | 0 | 0 | not significant |
| 9157 | GO_HOMEOSTATIC_PROCESS                                              | 1.05 | 0.53 | 0 | 0 | 0 | not significant |
| 9158 | MARTINEZ_TP53_TARGETS_UP                                            | 1.05 | 0.5  | 0 | 0 | 0 | not significant |
| 9159 | SPIELMAN_LYMPHOBLAST_EUROPEAN_VS_ASIAN_UP                           | 1.05 | 0.5  | 0 | 0 | 0 | not significant |
| 9160 | GO_POSITIVE_REGULATION_OF_IMMUNE_RESPONSE                           | 1.05 | 0.49 | 0 | 0 | 0 | not significant |
| 9161 | GO_COFACTOR_BINDING                                                 | 1.05 | 0.48 | 0 | 0 | 0 | not significant |
| 9162 | GO_DIVALENT_INORGANIC_CATION_HOMEOSTASIS                            | 1.05 | 0.47 | 0 | 0 | 0 | not significant |
| 9163 | ACEVEDO_LIVER_CANCER_WITH_H3K27ME3_UP                               | 1.05 | 0.46 | 0 | 0 | 0 | not significant |
| 9164 | GO_SEXUAL_REPRODUCTION                                              | 1.05 | 0.46 | 0 | 0 | 0 | not significant |
| 9165 | LU_AGING_BRAIN_UP                                                   | 1.05 | 0.46 | 0 | 0 | 0 | not significant |
| 9166 | RIZKI_TUMOR_INVASIVENESS_3D_DN                                      | 1.05 | 0.46 | 0 | 0 | 0 | not significant |
| 9167 | GO_CELL_PROJECTION_MEMBRANE                                         | 1.05 | 0.45 | 0 | 0 | 0 | not significant |
| 9168 | GO_PHOSPHATIDYLINOSITOL_BISPHOSPHATE_BINDING                        | 1.05 | 0.45 | 0 | 0 | 0 | not significant |
| 9169 | GO_RESPONSE_TO_OXIDATIVE_STRESS                                     | 1.05 | 0.45 | 0 | 0 | 0 | not significant |
| 9170 | GO_RESPONSE_TO_TUMOR_NECROSIS_FACTOR                                | 1.05 | 0.45 | 0 | 0 | 0 | not significant |
| 9171 | GO_TRANSMEMBRANE_RECEPTOR_PROTEIN_SERINE_THREONINE_KINASE_SIGNAL    | 1.05 | 0.45 | 0 | 0 | 0 | not significant |
| 9172 | JAATINEN_HEMATOPOIETIC_STEM_CELL_UP                                 | 1.05 | 0.45 | 0 | 0 | 0 | not significant |
| 9173 | REACTOME_INTERLEUKIN_17_SIGNALING                                   | 1.05 | 0.45 | 0 | 0 | 0 | not significant |
| 9174 | BURTON_ADIPOGENESIS_6                                               | 1.05 | 0.44 | 0 | 0 | 0 | not significant |
| 9175 | EIF4E_DN                                                            | 1.05 | 0.44 | 0 | 0 | 0 | not significant |
| 9176 | GO_CIRCULATORY_SYSTEM_PROCESS                                       | 1.05 | 0.44 | 0 | 0 | 0 | not significant |
| 9177 | GO_DAMAGED_DNA_BINDING                                              | 1.05 | 0.44 | 0 | 0 | 0 | not significant |
| 9178 | GO_LOCOMOTORY_BEHAVIOR                                              | 1.05 | 0.44 | 0 | 0 | 0 | not significant |
| 9179 | GO_MUSCLE_STRUCTURE_DEVELOPMENT                                     | 1.05 | 0.44 | 0 | 0 | 0 | not significant |
| 9180 | GO_PHAGOCYTOSIS                                                     | 1.05 | 0.44 | 0 | 0 | 0 | not significant |
| 9181 | GO_TRANSPORT_VESICLE                                                | 1.05 | 0.44 | 0 | 0 | 0 | not significant |
| 9182 | IL2_UP.V1_UP                                                        | 1.05 | 0.44 | 0 | 0 | 0 | not significant |
| 9183 | PID_RB_1PATHWAY                                                     | 1.05 | 0.44 | 0 | 0 | 0 | not significant |
| 9184 | POOLA_INVASIVE_BREAST_CANCER_UP                                     | 1.05 | 0.44 | 0 | 0 | 0 | not significant |
| 9185 | REACTOME_BIOSYNTHESIS_OF_THE_N_GLYCAN_PRECURSOR_DOLICHO_LIPID_LI    | 1.05 | 0.44 | 0 | 0 | 0 | not significant |
| 9186 | BILANGES_SERUM_SENSITIVE_GENES                                      | 1.05 | 0.43 | 0 | 0 | 0 | not significant |
| 9187 | CHR12Q21                                                            | 1.05 | 0.43 | 0 | 0 | 0 | not significant |
| 9188 | GHANDHI_DIRECT_IRRADIATION_UP                                       | 1.05 | 0.43 | 0 | 0 | 0 | not significant |
| 9189 | GO_POSITIVE_REGULATION_OF_HORMONE_SECRETION                         | 1.05 | 0.43 | 0 | 0 | 0 | not significant |
| 9190 | KYNG_ENVIRONMENTAL_STRESS_RESPONSE_UP                               | 1.05 | 0.43 | 0 | 0 | 0 | not significant |
| 9191 | MEISSNER_NPC_HCP_WITH_H3K4ME2_AND_H3K27ME3                          | 1.05 | 0.43 | 0 | 0 | 0 | not significant |
| 9192 | REACTOME_NOTCH1_INTRACELLULAR_DOMAIN_REGULATES_TRANSCRIPTION        | 1.05 | 0.43 | 0 | 0 | 0 | not significant |
| 9193 | DCA_UP.V1_UP                                                        | 1.05 | 0.42 | 0 | 0 | 0 | not significant |
| 9194 | GO_ACTIVATION_OF_JUN_KINASE_ACTIVITY                                | 1.05 | 0.42 | 0 | 0 | 0 | not significant |
| 9195 | GO_CLATHRIN_COATED_VESICLE_MEMBRANE                                 | 1.05 | 0.42 | 0 | 0 | 0 | not significant |
| 9196 | GO_POSITIVE_REGULATION_OF_ANION_TRANSPORT                           | 1.05 | 0.42 | 0 | 0 | 0 | not significant |
| 9197 | NAKAMURA_METASTASIS_MODEL_DN                                        | 1.05 | 0.42 | 0 | 0 | 0 | not significant |
| 9198 | CHIANG_LIVER_CANCER_SUBCLASS_POLYSOMY7_UP                           | 1.05 | 0.41 | 0 | 0 | 0 | not significant |
| 9199 | FLECHNER_PBL_KIDNEY_TRANSPLANT_REJECTED_VS_OK_DN                    | 1.05 | 0.41 | 0 | 0 | 0 | not significant |
| 9200 | GO_REGULATION_OF_SYNAPTIC_VESICLE_RECYCLING                         | 1.05 | 0.41 | 0 | 0 | 0 | not significant |
| 9201 | LEE_METASTASIS_AND_ALTERNATIVE_SPLICING_UP                          | 1.05 | 0.41 | 0 | 0 | 0 | not significant |
| 9202 | MARTIN_VIRAL_GPCR_SIGNALING_UP                                      | 1.05 | 0.41 | 0 | 0 | 0 | not significant |
| 9203 | WANG_RESPONSE_TO_ANDROGEN_UP                                        | 1.05 | 0.41 | 0 | 0 | 0 | not significant |
| 9204 | WUNDER_INFLAMMATORY_RESPONSE_AND_CHOLESTEROL_UP                     | 1.05 | 0.41 | 0 | 0 | 0 | not significant |
| 9205 | AMUNDSON_DNA_DAMAGE_RESPONSE_TP53                                   | 1.05 | 0.4  | 0 | 0 | 0 | not significant |
| 9206 | GO_REGULATION_OF_GLIAL_CELL_PROLIFERATION                           | 1.05 | 0.4  | 0 | 0 | 0 | not significant |
| 9207 | SHIPP_DLBCL_CURED_VS_FATAL_DN                                       | 1.05 | 0.4  | 0 | 0 | 0 | not significant |
| 9208 | GO_ARF_GUANYL_NUCLEOTIDE_EXCHANGE_FACTOR_ACTIVITY                   | 1.05 | 0.39 | 0 | 0 | 0 | not significant |
| 9209 | GO_FLUID_TRANSPORT                                                  | 1.05 | 0.39 | 0 | 0 | 0 | not significant |
| 9210 | GO_LYMPHOID_PROGENITOR_CELL_DIFFERENTIATION                         | 1.05 | 0.39 | 0 | 0 | 0 | not significant |
| 9211 | GO_NEGATIVE_REGULATION_OF_ALCOHOL_BIOSYNTHETIC_PROCESS              | 1.05 | 0.39 | 0 | 0 | 0 | not significant |
| 9212 | GO_NUCLEOSIDE_DIPHOSPHATASE_ACTIVITY                                | 1.05 | 0.39 | 0 | 0 | 0 | not significant |
| 9213 | GO_NUCLEOTIDE_ACTIVATED_PROTEIN_KINASE_COMPLEX                      | 1.05 | 0.39 | 0 | 0 | 0 | not significant |
| 9214 | RAY_TARGETS_OF_P210_BCR_ABL_FUSION_DN                               | 1.05 | 0.39 | 0 | 0 | 0 | not significant |
| 9215 | GO_S_ACYLTRANSFERASE_ACTIVITY                                       | 1.05 | 0.38 | 0 | 0 | 0 | not significant |
| 9216 | GO_TRANSCYTOSIS                                                     | 1.05 | 0.38 | 0 | 0 | 0 | not significant |
| 9217 | HOWLIN_CITED1_TARGETS_2_DN                                          | 1.05 | 0.38 | 0 | 0 | 0 | not significant |
| 9218 | GO_CCR_CHEMOKINE_RECEPTOR_BINDING                                   | 1.05 | 0.37 | 0 | 0 | 0 | not significant |
| 9219 | JEON_SMAD6_TARGETS_UP                                               | 1.05 | 0.37 | 0 | 0 | 0 | not significant |
| 9220 | JL_METASTASIS_REPRESSED_BY_STK11                                    | 1.05 | 0.37 | 0 | 0 | 0 | not significant |
| 9221 | REACTOME_HDR_THROUGH_MMJ_ALT_NHEJ                                   | 1.05 | 0.37 | 0 | 0 | 0 | not significant |
| 9222 | YANG_BREAST_CANCER_ESR1_UP                                          | 1.05 | 0.37 | 0 | 0 | 0 | not significant |
| 9223 | BYSTRYKH_HEMATOPOIESIS_STEM_CELL_IL3RA                              | 1.05 | 0.36 | 0 | 0 | 0 | not significant |
| 9224 | GO_AUTOPHAGY_OF_NUCLEUS                                             | 1.05 | 0.36 | 0 | 0 | 0 | not significant |
| 9225 | GO_SULFATE_TRANSPORT                                                | 1.05 | 0.36 | 0 | 0 | 0 | not significant |
| 9226 | BIOCARTA_BTG2_PATHWAY                                               | 1.05 | 0.35 | 0 | 0 | 0 | not significant |
| 9227 | BIOCARTA_VITC2_PATHWAY                                              | 1.05 | 0.35 | 0 | 0 | 0 | not significant |
| 9228 | GO_CELLULAR_RESPONSE_TO_LITHIUM_ION                                 | 1.05 | 0.35 | 0 | 0 | 0 | not significant |
| 9229 | GO_EPITHELIAL_CELL_PROLIFERATION_INVOLVED_IN_PROSTATE_GLAND_DEVELC  | 1.05 | 0.35 | 0 | 0 | 0 | not significant |
| 9230 | GO_NEGATIVE_REGULATION_OF_VASCULAR_SMOOTH_MUSCLE_CELL_DIFFERENT     | 1.05 | 0.35 | 0 | 0 | 0 | not significant |
| 9231 | GO_POSITIVE_REGULATION_OF_PROTEIN_LOCALIZATION_TO_SYNAPSE           | 1.05 | 0.35 | 0 | 0 | 0 | not significant |
| 9232 | GO_DENDRITE_SELF_AVOIDANCE                                          | 1.05 | 0.34 | 0 | 0 | 0 | not significant |
| 9233 | GO_HISTONE_DEMETHYLASE_ACTIVITY_H3_K27_SPECIFIC_                    | 1.05 | 0.34 | 0 | 0 | 0 | not significant |
| 9234 | GO_REGULATION_OF_APOPTOTIC_PROCESS_INVOLVED_IN_MORPHOGENESIS        | 1.05 | 0.34 | 0 | 0 | 0 | not significant |
| 9235 | GO_REGULATION_OF_HYDROGEN_PEROXIDE_METABOLIC_PROCESS                | 1.05 | 0.34 | 0 | 0 | 0 | not significant |
| 9236 | ABDULRAHMAN_KIDNEY_CANCER_VHL_UP                                    | 1.05 | 0.33 | 0 | 0 | 0 | not significant |
| 9237 | GO_INTERFERON_RECEPTOR_ACTIVITY                                     | 1.05 | 0.33 | 0 | 0 | 0 | not significant |
| 9238 | NUYTEN_NIPP1_TARGETS_UP                                             | 1.06 | 0.55 | 0 | 0 | 0 | not significant |
| 9239 | MARTENS_TRETINOIN_RESPONSE_DN                                       | 1.06 | 0.53 | 0 | 0 | 0 | not significant |
| 9240 | REACTOME_SIGNALING_BY_GPCR                                          | 1.06 | 0.53 | 0 | 0 | 0 | not significant |
| 9241 | GO_CELLULAR_CHEMICAL_HOMEOSTASIS                                    | 1.06 | 0.52 | 0 | 0 | 0 | not significant |
| 9242 | GO_POSITIVE_REGULATION_OF_CELL_DIFFERENTIATION                      | 1.06 | 0.52 | 0 | 0 | 0 | not significant |
| 9243 | WAKABAYASHI_ADIPOGENESIS_PPARG_RXRA_BOUND_8D                        | 1.06 | 0.52 | 0 | 0 | 0 | not significant |
| 9244 | GO_PROTEIN_COMPLEX_OLIGOMERIZATION                                  | 1.06 | 0.51 | 0 | 0 | 0 | not significant |
| 9245 | GO_REGULATORY_REGION_NUCLEIC_ACID_BINDING                           | 1.06 | 0.51 | 0 | 0 | 0 | not significant |
| 9246 | DAIRKEE_TERT_TARGETS_UP                                             | 1.06 | 0.5  | 0 | 0 | 0 | not significant |
| 9247 | GO_CELLULAR_ION_HOMEOSTASIS                                         | 1.06 | 0.5  | 0 | 0 | 0 | not significant |
| 9248 | GO_DNA_BINDING_TRANSCRIPTION_REPRESSOR_ACTIVITY_RNA_POLYMERASE_II_  | 1.06 | 0.5  | 0 | 0 | 0 | not significant |
| 9249 | GO_ENDOCYTOSIS                                                      | 1.06 | 0.5  | 0 | 0 | 0 | not significant |
| 9250 | GO_IMMUNE_RESPONSE_REGULATING_SIGNALING_PATHWAY                     | 1.06 | 0.49 | 0 | 0 | 0 | not significant |
| 9251 | GO_PEPTIDASE_ACTIVITY                                               | 1.06 | 0.49 | 0 | 0 | 0 | not significant |
| 9252 | LU_EZH2_TARGETS_UP                                                  | 1.06 | 0.49 | 0 | 0 | 0 | not significant |
| 9253 | GO_LOCALIZATION_WITHIN_MEMBRANE                                     | 1.06 | 0.48 | 0 | 0 | 0 | not significant |

|      |                                                                       |      |      |   |   |   |                 |
|------|-----------------------------------------------------------------------|------|------|---|---|---|-----------------|
| 9254 | FISCHER_DIRECT_P53_TARGETS_META_ANALYSIS                              | 1.06 | 0.47 | 0 | 0 | 0 | not significant |
| 9255 | GO_GLYCEROPHOSPHOLIPID_METABOLIC_PROCESS                              | 1.06 | 0.47 | 0 | 0 | 0 | not significant |
| 9256 | GO_OXIDOREDUCTASE_ACTIVITY_ACTING_ON_A_SULFUR_GROUP_OF_DONORS         | 1.06 | 0.47 | 0 | 0 | 0 | not significant |
| 9257 | GO_POLYSACCHARIDE_METABOLIC_PROCESS                                   | 1.06 | 0.47 | 0 | 0 | 0 | not significant |
| 9258 | KEGG_EPITHELIAL_CELL_SIGNALING_IN_HELICOBACTER_PYLORI_INFECTION       | 1.06 | 0.47 | 0 | 0 | 0 | not significant |
| 9259 | REACTOME_DDX58_IFIH1_MEDIATED_INDUCTION_OF_INTERFERON_ALPHA_BETA      | 1.06 | 0.47 | 0 | 0 | 0 | not significant |
| 9260 | REACTOME_FATTY_ACID_METABOLISM                                        | 1.06 | 0.47 | 0 | 0 | 0 | not significant |
| 9261 | DEMAGALHAES_AGING_UP                                                  | 1.06 | 0.46 | 0 | 0 | 0 | not significant |
| 9262 | DURCHDEWALD_SKIN_CARCINOGENESIS_DN                                    | 1.06 | 0.46 | 0 | 0 | 0 | not significant |
| 9263 | GO_DNA_RECOMBINATION                                                  | 1.06 | 0.46 | 0 | 0 | 0 | not significant |
| 9264 | GO_DNA_SYNTHESIS_INVOLVED_IN_DNA_REPAIR                               | 1.06 | 0.46 | 0 | 0 | 0 | not significant |
| 9265 | GO_REGULATION_OF_POSTSYNAPSE_ORGANIZATION                             | 1.06 | 0.46 | 0 | 0 | 0 | not significant |
| 9266 | GO_RESPONSE_TO_INTERLEUKIN_1                                          | 1.06 | 0.46 | 0 | 0 | 0 | not significant |
| 9267 | HALLMARK_PEROXISOME                                                   | 1.06 | 0.46 | 0 | 0 | 0 | not significant |
| 9268 | REACTOME_TELOMERE_MAINTENANCE                                         | 1.06 | 0.46 | 0 | 0 | 0 | not significant |
| 9269 | GO_AUTOPHAGOSOME_ORGANIZATION                                         | 1.06 | 0.45 | 0 | 0 | 0 | not significant |
| 9270 | GO_NEGATIVE_REGULATION_OF_LIPID_BIOSYNTHETIC_PROCESS                  | 1.06 | 0.45 | 0 | 0 | 0 | not significant |
| 9271 | GO_PROTEASE_BINDING                                                   | 1.06 | 0.45 | 0 | 0 | 0 | not significant |
| 9272 | WIERENGA_STAT5A_TARGETS_GROUP1                                        | 1.06 | 0.45 | 0 | 0 | 0 | not significant |
| 9273 | GO_IRON_ION_BINDING                                                   | 1.06 | 0.44 | 0 | 0 | 0 | not significant |
| 9274 | GO_POSITIVE_REGULATION_OF_MITOCHONDRION_ORGANIZATION                  | 1.06 | 0.44 | 0 | 0 | 0 | not significant |
| 9275 | LI_WILMS_TUMOR_VS_FETAL_KIDNEY_1_UP                                   | 1.06 | 0.44 | 0 | 0 | 0 | not significant |
| 9276 | REACTOME_SIGNALING_BY_NOTCH1_IN_CANCER                                | 1.06 | 0.44 | 0 | 0 | 0 | not significant |
| 9277 | SANSOM_APC_TARGETS_UP                                                 | 1.06 | 0.44 | 0 | 0 | 0 | not significant |
| 9278 | TAKEDA_TARGETS_OF_NUP98_HOXA9_FUSION_6HR_DN                           | 1.06 | 0.44 | 0 | 0 | 0 | not significant |
| 9279 | WARTERS_RESPONSE_TO_IR_SKIN                                           | 1.06 | 0.44 | 0 | 0 | 0 | not significant |
| 9280 | GO_CARBON_CARBON_LYASE_ACTIVITY                                       | 1.06 | 0.43 | 0 | 0 | 0 | not significant |
| 9281 | GO_NUCLEOSIDE_BISPHOSPHATE_METABOLIC_PROCESS                          | 1.06 | 0.43 | 0 | 0 | 0 | not significant |
| 9282 | GO_POSITIVE_REGULATION_OF_PEPTIDE_HORMONE_SECRETION                   | 1.06 | 0.43 | 0 | 0 | 0 | not significant |
| 9283 | REACTOME_TOLL_LIKE_RECEPTOR_9_TLR9_CASCADE                            | 1.06 | 0.43 | 0 | 0 | 0 | not significant |
| 9284 | BOYALT_LIVER_CANCER_SUBCLASS_G123_DN                                  | 1.06 | 0.42 | 0 | 0 | 0 | not significant |
| 9285 | CHR6Q23                                                               | 1.06 | 0.42 | 0 | 0 | 0 | not significant |
| 9286 | GO_AMMONIUM_ION_BINDING                                               | 1.06 | 0.42 | 0 | 0 | 0 | not significant |
| 9287 | GO_CHONDROITIN_SULFATE_PROTEOGLYCAN_BIOSYNTHETIC_PROCESS              | 1.06 | 0.42 | 0 | 0 | 0 | not significant |
| 9288 | GO_DICARBOXYLIC_ACID_TRANSMEMBRANE_TRANSPORTER_ACTIVITY               | 1.06 | 0.42 | 0 | 0 | 0 | not significant |
| 9289 | GO_FATTY_ACID_DERIVATIVE_BINDING                                      | 1.06 | 0.42 | 0 | 0 | 0 | not significant |
| 9290 | GO_PEPTIDASE_ACTIVATOR_ACTIVITY_INVOLVED_IN_APOPTOTIC_PROCESS         | 1.06 | 0.42 | 0 | 0 | 0 | not significant |
| 9291 | GO_POLYSACCHARIDE_BIOSYNTHETIC_PROCESS                                | 1.06 | 0.42 | 0 | 0 | 0 | not significant |
| 9292 | LEE_LIVER_CANCER_AOX1_UP                                              | 1.06 | 0.42 | 0 | 0 | 0 | not significant |
| 9293 | PID_ERBB2_ERBB3_PATHWAY                                               | 1.06 | 0.42 | 0 | 0 | 0 | not significant |
| 9294 | PID_TCTPT_PATHWAY                                                     | 1.06 | 0.42 | 0 | 0 | 0 | not significant |
| 9295 | BRACHAT_RESPONSE_TO_METHOTREXATE_UP                                   | 1.06 | 0.41 | 0 | 0 | 0 | not significant |
| 9296 | GO_B_CELL_RECEPTOR_SIGNALING_PATHWAY                                  | 1.06 | 0.41 | 0 | 0 | 0 | not significant |
| 9297 | GO_POSITIVE_REGULATION_OF_RESPONSE_TO_BIOTIC_STIMULUS                 | 1.06 | 0.41 | 0 | 0 | 0 | not significant |
| 9298 | GO_REGULATION_OF_COFACTOR_METABOLIC_PROCESS                           | 1.06 | 0.41 | 0 | 0 | 0 | not significant |
| 9299 | REACTOME_O_LINKED_GLYCOSYLATION_OF_MUCINS                             | 1.06 | 0.41 | 0 | 0 | 0 | not significant |
| 9300 | FERRANDO_HOX11_NEIGHBORS                                              | 1.06 | 0.4  | 0 | 0 | 0 | not significant |
| 9301 | GO_CHLORIDE_CHANNEL_INHIBITOR_ACTIVITY                                | 1.06 | 0.4  | 0 | 0 | 0 | not significant |
| 9302 | GO_GTPASE_INHIBITOR_ACTIVITY                                          | 1.06 | 0.4  | 0 | 0 | 0 | not significant |
| 9303 | GO_NEGATIVE_REGULATION_OF_INTERFERON_GAMMA_PRODUCTION                 | 1.06 | 0.4  | 0 | 0 | 0 | not significant |
| 9304 | GO_POSITIVE_REGULATION_OF_NEUROTRANSMITTER_SECRETION                  | 1.06 | 0.4  | 0 | 0 | 0 | not significant |
| 9305 | GO_PROTEIN_PROCESSING_INVOLVED_IN_PROTEIN_TARGETING_TO_MITOCHONDRION  | 1.06 | 0.4  | 0 | 0 | 0 | not significant |
| 9306 | GROSS_ELK3_TARGETS_UP                                                 | 1.06 | 0.4  | 0 | 0 | 0 | not significant |
| 9307 | HOFFMANN_PRE_BI_TO_LARGE_PRE_BII_LYMPHOCYTE_UP                        | 1.06 | 0.4  | 0 | 0 | 0 | not significant |
| 9308 | KEGG_O_GLYCAN_BIOSYNTHESIS                                            | 1.06 | 0.4  | 0 | 0 | 0 | not significant |
| 9309 | BERENJENO_ROCK_SIGNALING_NOT_VIA_RHOA_UP                              | 1.06 | 0.39 | 0 | 0 | 0 | not significant |
| 9310 | GO_REGULATION_OF_MORPHOGENESIS_OF_A_BRANCHING_STRUCTURE               | 1.06 | 0.39 | 0 | 0 | 0 | not significant |
| 9311 | GO_SOMATIC_DIVERSIFICATION_OF_IMMUNE_RECEPTORS_VIA_SOMATIC_MUTATION   | 1.06 | 0.39 | 0 | 0 | 0 | not significant |
| 9312 | GO_COFACTOR_TRANSMEMBRANE_TRANSPORTER_ACTIVITY                        | 1.06 | 0.38 | 0 | 0 | 0 | not significant |
| 9313 | GUTIERREZ_CHRONIC_LYMPHOCYTIC_LEUKEMIA_UP                             | 1.06 | 0.38 | 0 | 0 | 0 | not significant |
| 9314 | GO_BBSOME                                                             | 1.06 | 0.37 | 0 | 0 | 0 | not significant |
| 9315 | GO_GLOMERULAR_MESANGIUM_DEVELOPMENT                                   | 1.06 | 0.37 | 0 | 0 | 0 | not significant |
| 9316 | GO_HISTONE_H3_K27_TRIMETHYLATION                                      | 1.06 | 0.37 | 0 | 0 | 0 | not significant |
| 9317 | GO_NEGATIVE_REGULATION_OF_B_CELL_MEDIATED_IMMUNITY                    | 1.06 | 0.37 | 0 | 0 | 0 | not significant |
| 9318 | GO_REGULATION_OF_CHROMATIN_BINDING                                    | 1.06 | 0.37 | 0 | 0 | 0 | not significant |
| 9319 | GO_RESPONSE_TO_UV_B                                                   | 1.06 | 0.37 | 0 | 0 | 0 | not significant |
| 9320 | GO_POSITIVE_REGULATION_OF_CELL_MIGRATION_BY_VASCULAR_ENDOTHELIAL_CELL | 1.06 | 0.36 | 0 | 0 | 0 | not significant |
| 9321 | GO_Y_FORM_DNA_BINDING                                                 | 1.06 | 0.36 | 0 | 0 | 0 | not significant |
| 9322 | CLAUS_PGR_POSITIVE_MENINGIOMA_UP                                      | 1.06 | 0.35 | 0 | 0 | 0 | not significant |
| 9323 | GO_MODULATION_OF_PROGRAMMED_CELL_DEATH_IN_OTHER_ORGANISM              | 1.06 | 0.35 | 0 | 0 | 0 | not significant |
| 9324 | GO_NEGATIVE_REGULATION_OF_HORMONE_METABOLIC_PROCESS                   | 1.06 | 0.35 | 0 | 0 | 0 | not significant |
| 9325 | GO_REGULATION_OF_APOPTOTIC_PROCESS_INVOLVED_IN_DEVELOPMENT            | 1.06 | 0.35 | 0 | 0 | 0 | not significant |
| 9326 | GO_REGULATION_OF_HISTONE_DEACETYLASE_ACTIVITY                         | 1.06 | 0.35 | 0 | 0 | 0 | not significant |
| 9327 | GO_REGULATION_OF_RESPONSE_TO_STRESS                                   | 1.07 | 0.62 | 0 | 0 | 0 | not significant |
| 9328 | GO_RESPONSE_TO_GROWTH_FACTOR                                          | 1.07 | 0.55 | 0 | 0 | 0 | not significant |
| 9329 | WANG_LMO4_TARGETS_UP                                                  | 1.07 | 0.53 | 0 | 0 | 0 | not significant |
| 9330 | ACEVEDO_NORMAL_TISSUE_ADJACENT_TO_LIVER_TUMOR_DN                      | 1.07 | 0.51 | 0 | 0 | 0 | not significant |
| 9331 | GO_COENZYME_BINDING                                                   | 1.07 | 0.5  | 0 | 0 | 0 | not significant |
| 9332 | PLASARI_TGFB1_TARGETS_10HR_DN                                         | 1.07 | 0.5  | 0 | 0 | 0 | not significant |
| 9333 | GO_SYNAPTIC_MEMBRANE                                                  | 1.07 | 0.49 | 0 | 0 | 0 | not significant |
| 9334 | LIM_MAMMARY_LUMINAL_MATURE_UP                                         | 1.07 | 0.49 | 0 | 0 | 0 | not significant |
| 9335 | KEGG_MAPK_SIGNALING_PATHWAY                                           | 1.07 | 0.48 | 0 | 0 | 0 | not significant |
| 9336 | LEE_LIVER_CANCER_SURVIVAL_UP                                          | 1.07 | 0.48 | 0 | 0 | 0 | not significant |
| 9337 | CADWELL_ATG16L1_TARGETS_DN                                            | 1.07 | 0.47 | 0 | 0 | 0 | not significant |
| 9338 | GO_DENDRITE_MORPHOGENESIS                                             | 1.07 | 0.47 | 0 | 0 | 0 | not significant |
| 9339 | GO_MULTICELLULAR_ORGANISM_GROWTH                                      | 1.07 | 0.47 | 0 | 0 | 0 | not significant |
| 9340 | GO_SMAD_BINDING                                                       | 1.07 | 0.47 | 0 | 0 | 0 | not significant |
| 9341 | KAUFFMANN_DNA_REPLICATION_GENES                                       | 1.07 | 0.47 | 0 | 0 | 0 | not significant |
| 9342 | BARIS_THYROID_CANCER_DN                                               | 1.07 | 0.46 | 0 | 0 | 0 | not significant |
| 9343 | CHR3Q23                                                               | 1.07 | 0.46 | 0 | 0 | 0 | not significant |
| 9344 | GO_CYCLIN_DEPENDENT_PROTEIN_SERINE_THREONINE_KINASE_REGULATOR_ACT1    | 1.07 | 0.46 | 0 | 0 | 0 | not significant |
| 9345 | GO_ENDOTHELIUM_DEVELOPMENT                                            | 1.07 | 0.46 | 0 | 0 | 0 | not significant |
| 9346 | GO_NEGATIVE_REGULATION_OF_MAP_KINASE_ACTIVITY                         | 1.07 | 0.46 | 0 | 0 | 0 | not significant |
| 9347 | MANTOVANI_VIRAL_GPCR_SIGNALING_UP                                     | 1.07 | 0.46 | 0 | 0 | 0 | not significant |
| 9348 | SMIRNOV_CIRCULATING_ENDOTHELIOCYTES_IN_CANCER_UP                      | 1.07 | 0.46 | 0 | 0 | 0 | not significant |
| 9349 | GO_CELLULAR_RESPONSE_TO_FATTY_ACID                                    | 1.07 | 0.45 | 0 | 0 | 0 | not significant |
| 9350 | GO_EMBRYONIC_PLACENTA_DEVELOPMENT                                     | 1.07 | 0.45 | 0 | 0 | 0 | not significant |
| 9351 | GO_LEUKOCYTE_HOMEOSTASIS                                              | 1.07 | 0.45 | 0 | 0 | 0 | not significant |
| 9352 | GO_POSITIVE_REGULATION_OF_CELLULAR_AMIDE_METABOLIC_PROCESS            | 1.07 | 0.45 | 0 | 0 | 0 | not significant |
| 9353 | GO_REGULATION_OF_ORGANIC_ACID_TRANSPORT                               | 1.07 | 0.45 | 0 | 0 | 0 | not significant |
| 9354 | HUANG_GATA2_TARGETS_DN                                                | 1.07 | 0.45 | 0 | 0 | 0 | not significant |
| 9355 | SANSOM_WNT_PATHWAY_REQUIRE_MYC                                        | 1.07 | 0.45 | 0 | 0 | 0 | not significant |
| 9356 | GO_ARF_PROTEIN_SIGNAL_TRANSDUCTION                                    | 1.07 | 0.44 | 0 | 0 | 0 | not significant |
| 9357 | GO_GLYCOGEN_BIOSYNTHETIC_PROCESS                                      | 1.07 | 0.44 | 0 | 0 | 0 | not significant |
| 9358 | LANG_MYB_FAMILY_TARGETS                                               | 1.07 | 0.44 | 0 | 0 | 0 | not significant |
| 9359 | LEONARD_HYPOXIA                                                       | 1.07 | 0.44 | 0 | 0 | 0 | not significant |
| 9360 | GO_HISTONE_H3_K9_MODIFICATION                                         | 1.07 | 0.43 | 0 | 0 | 0 | not significant |
| 9361 | GO_REGULATION_OF_SYSTEMIC_ARTERIAL_BLOOD_PRESSURE                     | 1.07 | 0.43 | 0 | 0 | 0 | not significant |
| 9362 | GO_TELENCEPHALON_GLIAL_CELL_MIGRATION                                 | 1.07 | 0.43 | 0 | 0 | 0 | not significant |

|      |                                                                                   |      |      |   |   |   |                 |
|------|-----------------------------------------------------------------------------------|------|------|---|---|---|-----------------|
| 9363 | HASINA_NOL7_TARGETS_UP                                                            | 1.07 | 0.43 | 0 | 0 | 0 | not significant |
| 9364 | KEGG_CITRATE_CYCLE_TCA_CYCLE                                                      | 1.07 | 0.43 | 0 | 0 | 0 | not significant |
| 9365 | VANDESLUIS_NORMAL_EMBRYOS_DN                                                      | 1.07 | 0.43 | 0 | 0 | 0 | not significant |
| 9366 | GO_ODONTOGENESIS_OF_DENTIN_CONTAINING_TOOTH                                       | 1.07 | 0.42 | 0 | 0 | 0 | not significant |
| 9367 | PID_S1P_META_PATHWAY                                                              | 1.07 | 0.42 | 0 | 0 | 0 | not significant |
| 9368 | REACTOME_REGULATED_NECROSIS                                                       | 1.07 | 0.42 | 0 | 0 | 0 | not significant |
| 9369 | GO_CD40_RECEPTOR_COMPLEX                                                          | 1.07 | 0.41 | 0 | 0 | 0 | not significant |
| 9370 | GO_DITERPENOID_METABOLIC_PROCESS                                                  | 1.07 | 0.41 | 0 | 0 | 0 | not significant |
| 9371 | GO_ERROR_PRONE_TRANSLESION_SYNTHESIS                                              | 1.07 | 0.41 | 0 | 0 | 0 | not significant |
| 9372 | GO_MANNOSE_BINDING                                                                | 1.07 | 0.41 | 0 | 0 | 0 | not significant |
| 9373 | GO_O_METHYLTRANSFERASE_ACTIVITY                                                   | 1.07 | 0.41 | 0 | 0 | 0 | not significant |
| 9374 | GO_POSITIVE_REGULATION_OF_ACTIVATED_T_CELL_PROLIFERATION                          | 1.07 | 0.41 | 0 | 0 | 0 | not significant |
| 9375 | KEGG_GLYCOSAMINOGLYCAN_BIOSYNTHESIS_KERATAN_SULFATE                               | 1.07 | 0.41 | 0 | 0 | 0 | not significant |
| 9376 | REACTOME_ACETYLCHOLINE_NEUROTRANSMITTER_RELEASE_CYCLE                             | 1.07 | 0.41 | 0 | 0 | 0 | not significant |
| 9377 | GO_CYCLOHYDROLASE_ACTIVITY                                                        | 1.07 | 0.4  | 0 | 0 | 0 | not significant |
| 9378 | GO_ESCRT_COMPLEX_DISASSEMBLY                                                      | 1.07 | 0.4  | 0 | 0 | 0 | not significant |
| 9379 | GO_LOW_DENSITY_LIPOPROTEIN_PARTICLE_RECEPTOR_CATABOLIC_PROCESS                    | 1.07 | 0.4  | 0 | 0 | 0 | not significant |
| 9380 | GO_PHOSPHATIDYLCHOLINE_TRANSPORTER_ACTIVITY                                       | 1.07 | 0.4  | 0 | 0 | 0 | not significant |
| 9381 | GO_RESPONSE_TO_WATER                                                              | 1.07 | 0.4  | 0 | 0 | 0 | not significant |
| 9382 | LIM_MAMMARY_LUMINAL_PROGENITOR_UP                                                 | 1.07 | 0.4  | 0 | 0 | 0 | not significant |
| 9383 | REACTOME_Glutamate_NEUROTRANSMITTER_RELEASE_CYCLE                                 | 1.07 | 0.4  | 0 | 0 | 0 | not significant |
| 9384 | REACTOME_NOTCH2_ACTIVATION_AND_TRANSMISSION_OF_SIGNAL_TO_THE_NUCLEI               | 1.07 | 0.4  | 0 | 0 | 0 | not significant |
| 9385 | GARGALOVIC_RESPONSE_TO_OXIDIZED_PHOSPHOLIPIDS_PURPLE_DN                           | 1.07 | 0.39 | 0 | 0 | 0 | not significant |
| 9386 | GO_NEUROTRANSMITTER_REUPTAKE                                                      | 1.07 | 0.39 | 0 | 0 | 0 | not significant |
| 9387 | GO_PURINERGIC_RECEPTOR_SIGNALING_PATHWAY                                          | 1.07 | 0.39 | 0 | 0 | 0 | not significant |
| 9388 | REACTOME_P38MAPK_EVENTS                                                           | 1.07 | 0.39 | 0 | 0 | 0 | not significant |
| 9389 | GO_DEAD_H_BOX_RNA_HELICASE_BINDING                                                | 1.07 | 0.38 | 0 | 0 | 0 | not significant |
| 9390 | REACTOME_ASSEMBLY_OF_THE_ORC_COMPLEX_AT_THE_ORIGIN_OF_REPLICATING_CHROMOSOMES     | 1.07 | 0.38 | 0 | 0 | 0 | not significant |
| 9391 | REACTOME_SIGNAL_REGULATORY_PROTEIN_FAMILY_INTERACTIONS                            | 1.07 | 0.38 | 0 | 0 | 0 | not significant |
| 9392 | CHIN_BREAST_CANCER_COPY_NUMBER_DN                                                 | 1.07 | 0.37 | 0 | 0 | 0 | not significant |
| 9393 | GO_NEGATIVE_REGULATION_OF_ARP2_3_COMPLEX_MEDIATED_ACTIN_NUCLEATION                | 1.07 | 0.37 | 0 | 0 | 0 | not significant |
| 9394 | GO_PLATELET_DENSE_Granule_ORGANIZATION                                            | 1.07 | 0.37 | 0 | 0 | 0 | not significant |
| 9395 | GO_POSITIVE_REGULATION_OF_TRANSLATION_IN_RESPONSE_TO_STRESS                       | 1.07 | 0.37 | 0 | 0 | 0 | not significant |
| 9396 | LIU_CMYB_TARGETS_DN                                                               | 1.07 | 0.37 | 0 | 0 | 0 | not significant |
| 9397 | MCCABE_HOXC6_TARGETS_DN                                                           | 1.07 | 0.37 | 0 | 0 | 0 | not significant |
| 9398 | PHONG_TNF_TARGETS_DN                                                              | 1.07 | 0.37 | 0 | 0 | 0 | not significant |
| 9399 | GO_SUSCEPTIBILITY_TO_NATURAL_KILLER_CELL_MEDIATED_CYTOTOXICITY                    | 1.07 | 0.36 | 0 | 0 | 0 | not significant |
| 9400 | GO_CELLULAR_HOMEOSTASIS                                                           | 1.08 | 0.59 | 0 | 0 | 0 | not significant |
| 9401 | GO_MALE_GAMETE_GENERATION                                                         | 1.08 | 0.58 | 0 | 0 | 0 | not significant |
| 9402 | GO_EPITHELIAL_CELL_DIFFERENTIATION                                                | 1.08 | 0.56 | 0 | 0 | 0 | not significant |
| 9403 | GO_CARBOHYDRATE_METABOLIC_PROCESS                                                 | 1.08 | 0.55 | 0 | 0 | 0 | not significant |
| 9404 | ZHU_CMV_ALL_UP                                                                    | 1.08 | 0.53 | 0 | 0 | 0 | not significant |
| 9405 | CHEN_HOXA5_TARGETS_9HR_UP                                                         | 1.08 | 0.52 | 0 | 0 | 0 | not significant |
| 9406 | GO_PHOSPHATIDYLINOSITOL_PHOSPHATE_BINDING                                         | 1.08 | 0.52 | 0 | 0 | 0 | not significant |
| 9407 | NABA_MATRISOME_ASSOCIATED                                                         | 1.08 | 0.52 | 0 | 0 | 0 | not significant |
| 9408 | GINESTIER_BREAST_CANCER_20Q13_AMPLIFICATION_DN                                    | 1.08 | 0.51 | 0 | 0 | 0 | not significant |
| 9409 | GO_GLIOGENESIS                                                                    | 1.08 | 0.51 | 0 | 0 | 0 | not significant |
| 9410 | GO_CELLULAR_GLUCOSE_HOMEOSTASIS                                                   | 1.08 | 0.5  | 0 | 0 | 0 | not significant |
| 9411 | REACTOME_TOLL_LIKE_RECEPTOR_TLR1:TLR2_CASCADE                                     | 1.08 | 0.5  | 0 | 0 | 0 | not significant |
| 9412 | UEDA_PERIPHERAL_CLOCK                                                             | 1.08 | 0.5  | 0 | 0 | 0 | not significant |
| 9413 | ZHU_CMV_24_HR_UP                                                                  | 1.08 | 0.5  | 0 | 0 | 0 | not significant |
| 9414 | EPPERT_HSC_R                                                                      | 1.08 | 0.49 | 0 | 0 | 0 | not significant |
| 9415 | GO_REPRESSING_TRANSCRIPTION_FACTOR_BINDING                                        | 1.08 | 0.49 | 0 | 0 | 0 | not significant |
| 9416 | KOYAMA_SEMA3B_TARGETS_UP                                                          | 1.08 | 0.49 | 0 | 0 | 0 | not significant |
| 9417 | GO_AUTOPHAGY_OF_MITOCHONDRION                                                     | 1.08 | 0.48 | 0 | 0 | 0 | not significant |
| 9418 | GO_CELLULAR_RESPONSE_TO_STARVATION                                                | 1.08 | 0.48 | 0 | 0 | 0 | not significant |
| 9419 | GO_PHOSPHOLIPID_TRANSPORTER_ACTIVITY                                              | 1.08 | 0.48 | 0 | 0 | 0 | not significant |
| 9420 | GO_RAB_PROTEIN_SIGNAL_TRANSDUCTION                                                | 1.08 | 0.48 | 0 | 0 | 0 | not significant |
| 9421 | HUANG_DASATINIB_RESISTANCE_DN                                                     | 1.08 | 0.48 | 0 | 0 | 0 | not significant |
| 9422 | REACTOME_SENESCENCE_ASSOCIATED_SECRETORY_PHENOTYPE_SASP                           | 1.08 | 0.48 | 0 | 0 | 0 | not significant |
| 9423 | REACTOME_SYNTHESIS_OF_SUBSTRATES_IN_N_GLYCAN_BIOSYNTHESIS                         | 1.08 | 0.48 | 0 | 0 | 0 | not significant |
| 9424 | BILBAN_B_GLI_LPL_UP                                                               | 1.08 | 0.47 | 0 | 0 | 0 | not significant |
| 9425 | GOLDRATH_IMMUNE_MEMORY                                                            | 1.08 | 0.47 | 0 | 0 | 0 | not significant |
| 9426 | GO_DNA_DIRECTED_DNA_POLYMERASE_ACTIVITY                                           | 1.08 | 0.46 | 0 | 0 | 0 | not significant |
| 9427 | GO_NEGATIVE_REGULATION_OF_EXTRINSIC_APOPTOTIC_SIGNALING_PATHWAY_VIA_MITOCHONDRION | 1.08 | 0.46 | 0 | 0 | 0 | not significant |
| 9428 | PID_PS1_PATHWAY                                                                   | 1.08 | 0.46 | 0 | 0 | 0 | not significant |
| 9429 | REACTOME_REGULATION_OF_PTEIN_GENE_TRANSCRIPTION                                   | 1.08 | 0.46 | 0 | 0 | 0 | not significant |
| 9430 | WAKABAYASHI_ADIPOGENESIS_PPARG_BOUND_36HR                                         | 1.08 | 0.46 | 0 | 0 | 0 | not significant |
| 9431 | GO_CELLULAR_DETOXIFICATION                                                        | 1.08 | 0.45 | 0 | 0 | 0 | not significant |
| 9432 | GO_MITOPHAGY                                                                      | 1.08 | 0.45 | 0 | 0 | 0 | not significant |
| 9433 | GO_REGULATION_OF_DENDRITIC_SPINE_MORPHOGENESIS                                    | 1.08 | 0.45 | 0 | 0 | 0 | not significant |
| 9434 | GO_REGULATION_OF_HAIR_CYCLE                                                       | 1.08 | 0.45 | 0 | 0 | 0 | not significant |
| 9435 | KEGG_TRYPTOPHAN_METABOLISM                                                        | 1.08 | 0.45 | 0 | 0 | 0 | not significant |
| 9436 | REACTOME_DUAL_INCISION_IN_GG_NER                                                  | 1.08 | 0.45 | 0 | 0 | 0 | not significant |
| 9437 | GO_NUCLEUS_LOCALIZATION                                                           | 1.08 | 0.44 | 0 | 0 | 0 | not significant |
| 9438 | GO_POSITIVE_REGULATION_OF_PROTEIN_TYROSINE_KINASE_ACTIVITY                        | 1.08 | 0.44 | 0 | 0 | 0 | not significant |
| 9439 | GO_REGULATION_OF_RECEPTOR_RECYCLING                                               | 1.08 | 0.44 | 0 | 0 | 0 | not significant |
| 9440 | GO_RIBONUCLEOTIDE_CATABOLIC_PROCESS                                               | 1.08 | 0.44 | 0 | 0 | 0 | not significant |
| 9441 | LEE_LIVER_CANCER_MYC_E2F1_UP                                                      | 1.08 | 0.44 | 0 | 0 | 0 | not significant |
| 9442 | MCDOWELL_ACUTE_LUNG_INJURY_DN                                                     | 1.08 | 0.44 | 0 | 0 | 0 | not significant |
| 9443 | REACTOME_SYNTHESIS_OF_PC                                                          | 1.08 | 0.44 | 0 | 0 | 0 | not significant |
| 9444 | SCHAEFFER_SOX9_TARGETS_IN_PROSTATE_DEVELOPMENT_UP                                 | 1.08 | 0.44 | 0 | 0 | 0 | not significant |
| 9445 | GO_LYMPH_VESSEL_DEVELOPMENT                                                       | 1.08 | 0.43 | 0 | 0 | 0 | not significant |
| 9446 | NOJIMA_SFRP2_TARGETS_UP                                                           | 1.08 | 0.43 | 0 | 0 | 0 | not significant |
| 9447 | SA_G1_AND_S_PHASES                                                                | 1.08 | 0.43 | 0 | 0 | 0 | not significant |
| 9448 | GO_INTRACELLULAR_LIGAND_GATED_ION_CHANNEL_ACTIVITY                                | 1.08 | 0.42 | 0 | 0 | 0 | not significant |
| 9449 | GO_PROTEIN_TARGETING_TO_LYSOSOME                                                  | 1.08 | 0.42 | 0 | 0 | 0 | not significant |
| 9450 | GO_RESPONSE_TO_L_Glutamate                                                        | 1.08 | 0.41 | 0 | 0 | 0 | not significant |
| 9451 | CARDOSO_RESPONSE_TO_GAMMA_RADIATION_AND_3AB                                       | 1.08 | 0.4  | 0 | 0 | 0 | not significant |
| 9452 | GO_GAMMA_TUBULIN_LARGE_COMPLEX                                                    | 1.08 | 0.4  | 0 | 0 | 0 | not significant |
| 9453 | GO_POSITIVE_REGULATION_OF_DOUBLE_STRAND_BREAK_REPAIR_VIA_HOMOLOGOUS_RECOMBINATION | 1.08 | 0.4  | 0 | 0 | 0 | not significant |
| 9454 | GO_QUATERNARY_AMMONIUM_GROUP_TRANSMEMBRANE_TRANSPORTER_ACTIVITY                   | 1.08 | 0.4  | 0 | 0 | 0 | not significant |
| 9455 | GO_CELL_PROLIFERATION_IN_HINDRAIN                                                 | 1.08 | 0.39 | 0 | 0 | 0 | not significant |
| 9456 | GO_FATTY_ACID_SYNTHASE_ACTIVITY                                                   | 1.08 | 0.39 | 0 | 0 | 0 | not significant |
| 9457 | GO_REGULATION_OF_INOSITOL_PHOSPHATE_BIOSYNTHETIC_PROCESS                          | 1.08 | 0.39 | 0 | 0 | 0 | not significant |
| 9458 | GO_RESPONSE_TO_CELL_CYCLE_CHECKPOINT_SIGNALING                                    | 1.08 | 0.39 | 0 | 0 | 0 | not significant |
| 9459 | REACTOME_ACTIVATION_OF_NOXA_AND_TRANSLLOCATION_TO_MITOCHONDRION                   | 1.08 | 0.39 | 0 | 0 | 0 | not significant |
| 9460 | GO_1_ACYLGLYCEROPHOSPHOCHOLINE_O_AcylTRANSFERASE_ACTIVITY                         | 1.08 | 0.38 | 0 | 0 | 0 | not significant |
| 9461 | GO_ACETYL_COA_C_AcylTRANSFERASE_ACTIVITY                                          | 1.08 | 0.38 | 0 | 0 | 0 | not significant |
| 9462 | GO_FOREBRAIN_RADIAL_GLIAL_CELL_DIFFERENTIATION                                    | 1.08 | 0.38 | 0 | 0 | 0 | not significant |
| 9463 | GO_POSITIVE_REGULATION_OF_CELLULAR_RESPONSE_TO_DRUG                               | 1.08 | 0.38 | 0 | 0 | 0 | not significant |
| 9464 | GO_CAMP_CATABOLIC_PROCESS                                                         | 1.08 | 0.37 | 0 | 0 | 0 | not significant |
| 9465 | MEISSNER_NPC_ICP_WITH_H3_UNMETHYLATED                                             | 1.08 | 0.37 | 0 | 0 | 0 | not significant |
| 9466 | GO_DOUBLE_STRANDED_DNA_BINDING                                                    | 1.09 | 0.68 | 0 | 0 | 0 | not significant |
| 9467 | GO_SMALL_GTPASE_MEDIATED_SIGNAL_TRANSDUCTION                                      | 1.09 | 0.63 | 0 | 0 | 0 | not significant |
| 9468 | GO_PROCESS_UTILIZING_AUTOPHAGIC_MECHANISM                                         | 1.09 | 0.6  | 0 | 0 | 0 | not significant |
| 9469 | MCCABE_BOUND_BY_HOXC6                                                             | 1.09 | 0.58 | 0 | 0 | 0 | not significant |
| 9470 | GO_RESPONSE_TO_INORGANIC_SUBSTANCE                                                | 1.09 | 0.57 | 0 | 0 | 0 | not significant |
| 9471 | MATSUDA_NATURAL_KILLER_DIFFERENTIATION                                            | 1.09 | 0.57 | 0 | 0 | 0 | not significant |

|      |                                                                  |      |      |   |   |   |                 |
|------|------------------------------------------------------------------|------|------|---|---|---|-----------------|
| 9472 | GCNP_SHH_UP_LATE.V1_DN                                           | 1.09 | 0.56 | 0 | 0 | 0 | not significant |
| 9473 | GO_GLAND_DEVELOPMENT                                             | 1.09 | 0.56 | 0 | 0 | 0 | not significant |
| 9474 | REACTOME_CELLULAR_SENESCENCE                                     | 1.09 | 0.56 | 0 | 0 | 0 | not significant |
| 9475 | YAGI_AML_WITH_11Q23_REARRANGED                                   | 1.09 | 0.56 | 0 | 0 | 0 | not significant |
| 9476 | CHICAS_RB1_TARGETS_GROWING                                       | 1.09 | 0.55 | 0 | 0 | 0 | not significant |
| 9477 | GO_INTRACELLULAR_RECEPTOR_SIGNALING_PATHWAY                      | 1.09 | 0.55 | 0 | 0 | 0 | not significant |
| 9478 | REACTOME_UNFOLDED_PROTEIN_RESPONSE_UPR                           | 1.09 | 0.54 | 0 | 0 | 0 | not significant |
| 9479 | JISON_SICKLE_CELL_DISEASE_UP                                     | 1.09 | 0.53 | 0 | 0 | 0 | not significant |
| 9480 | GO_EXOCYTTIC_VESICLE                                             | 1.09 | 0.52 | 0 | 0 | 0 | not significant |
| 9481 | GO_GO_TO_G1_TRANSITION                                           | 1.09 | 0.52 | 0 | 0 | 0 | not significant |
| 9482 | KAAB_HEART_ATRIUM_VS_VENTRICLE_UP                                | 1.09 | 0.52 | 0 | 0 | 0 | not significant |
| 9483 | PETROVA_ENDOTHELUM_LYMPHATIC_VS_BLOOD_DN                         | 1.09 | 0.52 | 0 | 0 | 0 | not significant |
| 9484 | CAMPS_COLON_CANCER_COPY_NUMBER_UP                                | 1.09 | 0.51 | 0 | 0 | 0 | not significant |
| 9485 | GO_BRUSH_BORDER                                                  | 1.09 | 0.51 | 0 | 0 | 0 | not significant |
| 9486 | BOYALT_LIVER_CANCER_SUBCLASS_G1_UP                               | 1.09 | 0.5  | 0 | 0 | 0 | not significant |
| 9487 | GO_DENDRITIC_SPINE_MORPHOGENESIS                                 | 1.09 | 0.5  | 0 | 0 | 0 | not significant |
| 9488 | GO_ENDODEOXYRIBONUCLEASE_ACTIVITY                                | 1.09 | 0.5  | 0 | 0 | 0 | not significant |
| 9489 | GO_RESPONSE_TO_AMINO_ACID_STARVATION                             | 1.09 | 0.5  | 0 | 0 | 0 | not significant |
| 9490 | GO_VITAMIN_BINDING                                               | 1.09 | 0.5  | 0 | 0 | 0 | not significant |
| 9491 | KIM_MYCN_AMPLIFICATION_TARGETS_UP                                | 1.09 | 0.5  | 0 | 0 | 0 | not significant |
| 9492 | REACTOME_TP53_REGULATES_TRANSCRIPTION_OF_CELL_CYCLE_GENES        | 1.09 | 0.5  | 0 | 0 | 0 | not significant |
| 9493 | SANA_TNF_SIGNALING_DN                                            | 1.09 | 0.5  | 0 | 0 | 0 | not significant |
| 9494 | SUNG_METASTASIS_STROMA_DN                                        | 1.09 | 0.5  | 0 | 0 | 0 | not significant |
| 9495 | CAHOY_ASTROGLIAL                                                 | 1.09 | 0.49 | 0 | 0 | 0 | not significant |
| 9496 | GO_RESPONSE_TO_GAMMA_RADIATION                                   | 1.09 | 0.49 | 0 | 0 | 0 | not significant |
| 9497 | GO_SPINAL_CORD_DEVELOPMENT                                       | 1.09 | 0.49 | 0 | 0 | 0 | not significant |
| 9498 | KEGG_GLYCEROPHOSPHOLIPID_METABOLISM                              | 1.09 | 0.49 | 0 | 0 | 0 | not significant |
| 9499 | LEIN_MIDBRAIN_MARKERS                                            | 1.09 | 0.49 | 0 | 0 | 0 | not significant |
| 9500 | PANGAS_TUMOR_SUPPRESSION_BY_SMAD1_AND_SMAD5_UP                   | 1.09 | 0.49 | 0 | 0 | 0 | not significant |
| 9501 | PID_ENDOTHELIN_PATHWAY                                           | 1.09 | 0.49 | 0 | 0 | 0 | not significant |
| 9502 | REACTOME_TRIF_TICAM1_MEDIATED_TLR4_SIGNALING                     | 1.09 | 0.49 | 0 | 0 | 0 | not significant |
| 9503 | STEIN_ESR1_TARGETS                                               | 1.09 | 0.49 | 0 | 0 | 0 | not significant |
| 9504 | GO_NUCLEAR_REPLICATION_FORK                                      | 1.09 | 0.48 | 0 | 0 | 0 | not significant |
| 9505 | GO_SOMATIC_RECOMBINATION_OF_IMMUNOGLOBULIN_GENE_SEGMENTS         | 1.09 | 0.48 | 0 | 0 | 0 | not significant |
| 9506 | REACTOME_ANTIGEN_PRESENTATION_FOLDING_ASSEMBLY_AND_PEPTIDE_LOADI | 1.09 | 0.48 | 0 | 0 | 0 | not significant |
| 9507 | GO_HOMOLOGOUS_RECOMBINATION                                      | 1.09 | 0.47 | 0 | 0 | 0 | not significant |
| 9508 | GO_PHAGOPHORE_ASSEMBLY_SITE                                      | 1.09 | 0.47 | 0 | 0 | 0 | not significant |
| 9509 | GO_REGULATION_OF_MYELOID_LEUKOCYTE_MEDIATED_IMMUNITY             | 1.09 | 0.47 | 0 | 0 | 0 | not significant |
| 9510 | GO_REGULATION_OF_SPINDLE_CHECKPOINT                              | 1.09 | 0.47 | 0 | 0 | 0 | not significant |
| 9511 | PID_NFKAPPAB_CANONICAL_PATHWAY                                   | 1.09 | 0.47 | 0 | 0 | 0 | not significant |
| 9512 | PID_SMAD2_3NUCLEAR_PATHWAY                                       | 1.09 | 0.47 | 0 | 0 | 0 | not significant |
| 9513 | BIOCARTA_NKCELLS_PATHWAY                                         | 1.09 | 0.46 | 0 | 0 | 0 | not significant |
| 9514 | BRACHAT_RESPONSE_TO_CAMPTOTHECIN_DN                              | 1.09 | 0.46 | 0 | 0 | 0 | not significant |
| 9515 | GO_NEGATIVE_REGULATION_OF_ANIMAL_ORGAN_MORPHOGENESIS             | 1.09 | 0.46 | 0 | 0 | 0 | not significant |
| 9516 | GO_POSITIVE_REGULATION_OF_BLOOD_VESSEL_DIAMETER                  | 1.09 | 0.46 | 0 | 0 | 0 | not significant |
| 9517 | KEGG_NITROGEN_METABOLISM                                         | 1.09 | 0.46 | 0 | 0 | 0 | not significant |
| 9518 | REACTOME_NEUROTRANSMITTER_RELEASE_CYCLE                          | 1.09 | 0.46 | 0 | 0 | 0 | not significant |
| 9519 | GO_CYTOPLASMIC_SEQUESTERING_OF_PROTEIN                           | 1.09 | 0.45 | 0 | 0 | 0 | not significant |
| 9520 | GO_MISFOLDED_PROTEIN_BINDING                                     | 1.09 | 0.45 | 0 | 0 | 0 | not significant |
| 9521 | GO_NEGATIVE_REGULATION_OF_STRIATED_MUSCLE_CELL_DIFFERENTIATION   | 1.09 | 0.45 | 0 | 0 | 0 | not significant |
| 9522 | GO_STEROID_CATABOLIC_PROCESS                                     | 1.09 | 0.45 | 0 | 0 | 0 | not significant |
| 9523 | GO_GLYCOLIPID_BINDING                                            | 1.09 | 0.44 | 0 | 0 | 0 | not significant |
| 9524 | GO_NEGATIVE_REGULATION_OF_PROTEIN_TYROSINE_KINASE_ACTIVITY       | 1.09 | 0.44 | 0 | 0 | 0 | not significant |
| 9525 | GO_POSITIVE_REGULATION_OF_STRIATED_MUSCLE_CELL_DIFFERENTIATION   | 1.09 | 0.44 | 0 | 0 | 0 | not significant |
| 9526 | MYLLYKANGAS_AMPLIFICATION_HOT_SPOT_12                            | 1.09 | 0.44 | 0 | 0 | 0 | not significant |
| 9527 | REACTOME_ACTIVATION_OF_PUMA_AND_TRANSLOCATION_TO_MITOCHONDRIA    | 1.09 | 0.44 | 0 | 0 | 0 | not significant |
| 9528 | GO_POSITIVE_REGULATION_OF_DNA_DAMAGE_RESPONSE_SIGNAL_TRANSDUCTIC | 1.09 | 0.43 | 0 | 0 | 0 | not significant |
| 9529 | GO_POSTSYNAPTIC_NEUROTRANSMITTER_RECEPTOR_ACTIVITY               | 1.09 | 0.43 | 0 | 0 | 0 | not significant |
| 9530 | GO_SEMAPHORIN_RECEPTOR_BINDING                                   | 1.09 | 0.43 | 0 | 0 | 0 | not significant |
| 9531 | REACTOME_STRIATED_MUSCLE_CONTRACTION                             | 1.09 | 0.43 | 0 | 0 | 0 | not significant |
| 9532 | GO_CYTOPLASMIC_SIDE_OF_ENDOPLASMIC_RETICULUM_MEMBRANE            | 1.09 | 0.42 | 0 | 0 | 0 | not significant |
| 9533 | GO_NEUROPILIN_BINDING                                            | 1.09 | 0.42 | 0 | 0 | 0 | not significant |
| 9534 | GO_VENOUS_BLOOD_VESSEL_DEVELOPMENT                               | 1.09 | 0.42 | 0 | 0 | 0 | not significant |
| 9535 | SHIPP_DLBCL_CURED_VS_FATAL_UP                                    | 1.09 | 0.42 | 0 | 0 | 0 | not significant |
| 9536 | ZHENG_FOXP3_TARGETS_IN_T_LYMPHOCYTE_UP                           | 1.09 | 0.42 | 0 | 0 | 0 | not significant |
| 9537 | BAKER_HEMATOPOIESIS_STAT5_TARGETS                                | 1.09 | 0.41 | 0 | 0 | 0 | not significant |
| 9538 | LIU_TARGETS_OF_VMYB_VS_CMYB_UP                                   | 1.09 | 0.41 | 0 | 0 | 0 | not significant |
| 9539 | GO_GRANZYME_MEDIATED_APOPTOTIC_SIGNALING_PATHWAY                 | 1.09 | 0.4  | 0 | 0 | 0 | not significant |
| 9540 | GO_L_Glutamate_TRANSMEMBRANE_TRANSPORTER_ACTIVITY                | 1.09 | 0.4  | 0 | 0 | 0 | not significant |
| 9541 | GO_POSITIVE_REGULATION_OF_RESPONSE_TO_REACTIVE_OXYGEN_SPECIES    | 1.09 | 0.4  | 0 | 0 | 0 | not significant |
| 9542 | GO_PROTEIN_MEMBRANE_ANCHOR                                       | 1.09 | 0.4  | 0 | 0 | 0 | not significant |
| 9543 | GO_SEGMENT_SPECIFICATION                                         | 1.09 | 0.4  | 0 | 0 | 0 | not significant |
| 9544 | REACTOME_TRYPTOPHAN_CATABOLISM                                   | 1.09 | 0.4  | 0 | 0 | 0 | not significant |
| 9545 | GO_CHROMATIN_SILENCING_AT_TELOMERE                               | 1.09 | 0.39 | 0 | 0 | 0 | not significant |
| 9546 | GO_FAT_CELL_PROLIFERATION                                        | 1.09 | 0.39 | 0 | 0 | 0 | not significant |
| 9547 | GO_INTERLEUKIN_1_RECEPTOR_BINDING                                | 1.09 | 0.39 | 0 | 0 | 0 | not significant |
| 9548 | GO_POLYOL_TRANSPORT                                              | 1.09 | 0.39 | 0 | 0 | 0 | not significant |
| 9549 | GO_TOLL_LIKE_RECEPTOR_BINDING                                    | 1.09 | 0.39 | 0 | 0 | 0 | not significant |
| 9550 | GO_HEME_TRANSPORTER_ACTIVITY                                     | 1.09 | 0.38 | 0 | 0 | 0 | not significant |
| 9551 | GO_NODE_OF_RANVIER                                               | 1.09 | 0.38 | 0 | 0 | 0 | not significant |
| 9552 | REACTOME_INNATE_IMMUNE_SYSTEM                                    | 1.10 | 0.72 | 0 | 0 | 0 | not significant |
| 9553 | GO_LIPID_BINDING                                                 | 1.10 | 0.71 | 0 | 0 | 0 | not significant |
| 9554 | GO_ORGANIC_ACID_METABOLIC_PROCESS                                | 1.10 | 0.7  | 0 | 0 | 0 | not significant |
| 9555 | GO_AGING                                                         | 1.10 | 0.62 | 0 | 0 | 0 | not significant |
| 9556 | MULLIGHAN_MLL_SIGNATURE_2_UP                                     | 1.10 | 0.62 | 0 | 0 | 0 | not significant |
| 9557 | GO_PROTEIN_HOMOLOGOMERIZATION                                    | 1.10 | 0.61 | 0 | 0 | 0 | not significant |
| 9558 | KAUFFMANN_DNA_REPAIR_GENES                                       | 1.10 | 0.61 | 0 | 0 | 0 | not significant |
| 9559 | TORCHIA_TARGETS_OF_EWSR1_FL11_FUSION_DN                          | 1.10 | 0.61 | 0 | 0 | 0 | not significant |
| 9560 | IVANOVA_HEMATOPOIESIS_MATURE_CELL                                | 1.10 | 0.6  | 0 | 0 | 0 | not significant |
| 9561 | KEGG_PATHWAYS_IN_CANCER                                          | 1.10 | 0.59 | 0 | 0 | 0 | not significant |
| 9562 | SHETH_LIVER_CANCER_VS_TXNP_LOSS_PAM4                             | 1.10 | 0.58 | 0 | 0 | 0 | not significant |
| 9563 | BROWNE_HCMV_INFECTION_8HR_UP                                     | 1.10 | 0.56 | 0 | 0 | 0 | not significant |
| 9564 | LTE2_UP.V1_UP                                                    | 1.10 | 0.56 | 0 | 0 | 0 | not significant |
| 9565 | REACTOME_TOLL_LIKE_RECEPTOR_4_TLR4_CASCADE                       | 1.10 | 0.56 | 0 | 0 | 0 | not significant |
| 9566 | GO_BASOLATERAL_PLASMA_MEMBRANE                                   | 1.10 | 0.55 | 0 | 0 | 0 | not significant |
| 9567 | IGARASHI_ATF4_TARGETS_DN                                         | 1.10 | 0.55 | 0 | 0 | 0 | not significant |
| 9568 | GO_POLYOL_BIOSYNTHETIC_PROCESS                                   | 1.10 | 0.54 | 0 | 0 | 0 | not significant |
| 9569 | REACTOME_MYD88_CASCADE_INITIATED_ON_PLASMA_MEMBRANE              | 1.10 | 0.54 | 0 | 0 | 0 | not significant |
| 9570 | STEIN_ESRRA_TARGETS_DN                                           | 1.10 | 0.54 | 0 | 0 | 0 | not significant |
| 9571 | GO_CARBOXYLIC_ESTER_HYDROLASE_ACTIVITY                           | 1.10 | 0.53 | 0 | 0 | 0 | not significant |
| 9572 | REACTOME_DISEASES_OF_GLYCOSYLATION                               | 1.10 | 0.53 | 0 | 0 | 0 | not significant |
| 9573 | TOOKER_GEMCITABINE_RESISTANCE_UP                                 | 1.10 | 0.52 | 0 | 0 | 0 | not significant |
| 9574 | BIOCARTA_MET_PATHWAY                                             | 1.10 | 0.51 | 0 | 0 | 0 | not significant |
| 9575 | GO_FERTILIZATION                                                 | 1.10 | 0.51 | 0 | 0 | 0 | not significant |
| 9576 | NAGASHIMA_NRG1_SIGNALING_DN                                      | 1.10 | 0.51 | 0 | 0 | 0 | not significant |
| 9577 | REACTOME_FOXO_MEDIATED_TRANSCRIPTION                             | 1.10 | 0.51 | 0 | 0 | 0 | not significant |
| 9578 | ZHOU_TNF_SIGNALING_30MIN                                         | 1.10 | 0.51 | 0 | 0 | 0 | not significant |
| 9579 | BIOCARTA_RACCYCD_PATHWAY                                         | 1.10 | 0.5  | 0 | 0 | 0 | not significant |
| 9580 | KEGG_ARGININE_AND_PROLINE_METABOLISM                             | 1.10 | 0.5  | 0 | 0 | 0 | not significant |

|      |                                                                     |      |      |   |   |   |                 |
|------|---------------------------------------------------------------------|------|------|---|---|---|-----------------|
| 9581 | BIOCARTA_CASPASE_PATHWAY                                            | 1.10 | 0.49 | 0 | 0 | 0 | not significant |
| 9582 | FRASOR_TAMOXIFEN_RESPONSE_UP                                        | 1.10 | 0.49 | 0 | 0 | 0 | not significant |
| 9583 | GO_INTRINSIC_COMPONENT_OF_POSTSYNAPTIC_MEMBRANE                     | 1.10 | 0.49 | 0 | 0 | 0 | not significant |
| 9584 | GO_NEGATIVE_REGULATION_OF_T_CELL_DIFFERENTIATION                    | 1.10 | 0.49 | 0 | 0 | 0 | not significant |
| 9585 | GO_REGULATION_OF_BIOMINERAL_TISSUE_DEVELOPMENT                      | 1.10 | 0.49 | 0 | 0 | 0 | not significant |
| 9586 | PID_HDAC_CLASSII_PATHWAY                                            | 1.10 | 0.49 | 0 | 0 | 0 | not significant |
| 9587 | CHR10Q11                                                            | 1.10 | 0.48 | 0 | 0 | 0 | not significant |
| 9588 | GO_B_CELL_HOMEOSTASIS                                               | 1.10 | 0.48 | 0 | 0 | 0 | not significant |
| 9589 | GO_CYTOPLASMIC_SEQUESTERING_OF_TRANSCRIPTION_FACTOR                 | 1.10 | 0.48 | 0 | 0 | 0 | not significant |
| 9590 | GO_DNA_STRAND_ELONGATION                                            | 1.10 | 0.48 | 0 | 0 | 0 | not significant |
| 9591 | KEGG_VIBRIO_CHOLERAE_INFECTION                                      | 1.10 | 0.48 | 0 | 0 | 0 | not significant |
| 9592 | REACTOME_FATTY_ACYL_COA_BIOSYNTHESIS                                | 1.10 | 0.48 | 0 | 0 | 0 | not significant |
| 9593 | ZHAN_MULTIPLE_MYELOMA_CD2_UP                                        | 1.10 | 0.48 | 0 | 0 | 0 | not significant |
| 9594 | BREUHAHN_GROWTH_FACTOR_SIGNALING_IN_LIVER_CANCER                    | 1.10 | 0.47 | 0 | 0 | 0 | not significant |
| 9595 | CHIBA_RESPONSE_TO_TSA                                               | 1.10 | 0.47 | 0 | 0 | 0 | not significant |
| 9596 | GO_MUSCLE_FIBER_DEVELOPMENT                                         | 1.10 | 0.47 | 0 | 0 | 0 | not significant |
| 9597 | GO_REGULATION_OF_ISOTYPE_SWITCHING                                  | 1.10 | 0.47 | 0 | 0 | 0 | not significant |
| 9598 | GO_REGULATION_OF_MONONUCLEAR_CELL_MIGRATION                         | 1.10 | 0.47 | 0 | 0 | 0 | not significant |
| 9599 | GO_REGULATION_OF_T_CELL_MIGRATION                                   | 1.10 | 0.47 | 0 | 0 | 0 | not significant |
| 9600 | LIN_NPAS4_TARGETS_DN                                                | 1.10 | 0.47 | 0 | 0 | 0 | not significant |
| 9601 | REACTOME_EFFECTS_OF_PIP2_HYDROLYSIS                                 | 1.10 | 0.47 | 0 | 0 | 0 | not significant |
| 9602 | REACTOME_INFLAMMASOMES                                              | 1.10 | 0.47 | 0 | 0 | 0 | not significant |
| 9603 | DELLA_RESPONSE_TO_TSA_AND_BUTYRATE                                  | 1.10 | 0.46 | 0 | 0 | 0 | not significant |
| 9604 | GO_ADRENERGIC_RECEPTOR_BINDING                                      | 1.10 | 0.46 | 0 | 0 | 0 | not significant |
| 9605 | GO_NEGATIVE_REGULATION_OF_ENDOPLASMIC_RETICULUM_UNFOLDED_PROTEIN    | 1.10 | 0.46 | 0 | 0 | 0 | not significant |
| 9606 | GO_NEGATIVE_REGULATION_OF_ORGAN_GROWTH                              | 1.10 | 0.46 | 0 | 0 | 0 | not significant |
| 9607 | GO_NEUTROPHIL_MIGRATION                                             | 1.10 | 0.46 | 0 | 0 | 0 | not significant |
| 9608 | GO_REGULATION_OF_ALPHA_BETA_T_CELL_DIFFERENTIATION                  | 1.10 | 0.46 | 0 | 0 | 0 | not significant |
| 9609 | GO_UBIQUITIN_UBIQUITIN_LIGASE_ACTIVITY                              | 1.10 | 0.46 | 0 | 0 | 0 | not significant |
| 9610 | CHR4Q13                                                             | 1.10 | 0.45 | 0 | 0 | 0 | not significant |
| 9611 | GO_DNA_POLYMERASE_COMPLEX                                           | 1.10 | 0.45 | 0 | 0 | 0 | not significant |
| 9612 | GO_PROTEIN_DISULFIDE_ISOMERASE_ACTIVITY                             | 1.10 | 0.45 | 0 | 0 | 0 | not significant |
| 9613 | HASLINGER_B_CELL_WITH_13Q14_DELETION                                | 1.10 | 0.45 | 0 | 0 | 0 | not significant |
| 9614 | BANDRES_RESPONSE_TO_CARMUSTIN_MGMT_24HR_UP                          | 1.10 | 0.44 | 0 | 0 | 0 | not significant |
| 9615 | GO_RESPONSE_TO_LEUCINE                                              | 1.10 | 0.44 | 0 | 0 | 0 | not significant |
| 9616 | GO_TUBULIN_DEACETYLATION                                            | 1.10 | 0.44 | 0 | 0 | 0 | not significant |
| 9617 | GRANDVAUX_IFN_RESPONSE_NOT_VIA_IRF3                                 | 1.10 | 0.44 | 0 | 0 | 0 | not significant |
| 9618 | HOLLEMAN_VINCISTINE_RESISTANCE_B_ALL_DN                             | 1.10 | 0.44 | 0 | 0 | 0 | not significant |
| 9619 | REACTOME_KSRP_KHSRP_BINDS_AND_DESTABILIZES_MRNA                     | 1.10 | 0.44 | 0 | 0 | 0 | not significant |
| 9620 | REACTOME_REGULATION_BY_C_FLIP                                       | 1.10 | 0.44 | 0 | 0 | 0 | not significant |
| 9621 | YEMELYANOV_GR_TARGETS_DN                                            | 1.10 | 0.44 | 0 | 0 | 0 | not significant |
| 9622 | ZEMBUTSU_SENSITIVITY_TO_MITOMYCIN                                   | 1.10 | 0.44 | 0 | 0 | 0 | not significant |
| 9623 | BIOCARTA_MHC_PATHWAY                                                | 1.10 | 0.43 | 0 | 0 | 0 | not significant |
| 9624 | GO_ATRIAL_SEPTUM_DEVELOPMENT                                        | 1.10 | 0.43 | 0 | 0 | 0 | not significant |
| 9625 | GO_ENDODEOXYRIBONUCLEASE_ACTIVITY_PRODUCING_3_PHOSPHOMONOESTER:     | 1.10 | 0.43 | 0 | 0 | 0 | not significant |
| 9626 | GO_NEGATIVE_REGULATION_OF_AMYLOID_PRECURSOR_PROTEIN_CATABOLIC_PF    | 1.10 | 0.43 | 0 | 0 | 0 | not significant |
| 9627 | GO_PHOSPHATIDYLETHANOLAMINE_BINDING                                 | 1.10 | 0.43 | 0 | 0 | 0 | not significant |
| 9628 | GO_REGULATION_OF_GERMINAL_CENTER_FORMATION                          | 1.10 | 0.43 | 0 | 0 | 0 | not significant |
| 9629 | WILSON_PROTEASES_AT_TUMOR_BONE_INTERFACE_UP                         | 1.10 | 0.43 | 0 | 0 | 0 | not significant |
| 9630 | GO_ANCHORED_COMPONENT_OF_SYNAPTIC_VESICLE_MEMBRANE                  | 1.10 | 0.42 | 0 | 0 | 0 | not significant |
| 9631 | GO_PARKIN_MEDIATED_STIMULATION_OF_MITOPHAGY_IN_RESPONSE_TO_MITOCH:  | 1.10 | 0.42 | 0 | 0 | 0 | not significant |
| 9632 | GO_SPERM_CAPACITATION                                               | 1.10 | 0.42 | 0 | 0 | 0 | not significant |
| 9633 | GO_WALKING_BEHAVIOR                                                 | 1.10 | 0.42 | 0 | 0 | 0 | not significant |
| 9634 | XU_HGF_TARGETS_INDUCED_BY_AKT1_48HR_UP                              | 1.10 | 0.42 | 0 | 0 | 0 | not significant |
| 9635 | GO_DEVELOPMENT_OF_SECONDARY_SEXUAL_CHARACTERISTICS                  | 1.10 | 0.41 | 0 | 0 | 0 | not significant |
| 9636 | GO_MUCOSAL_ASSOCIATED_LYMPHOID_TISSUE_DEVELOPMENT                   | 1.10 | 0.41 | 0 | 0 | 0 | not significant |
| 9637 | GO_NEGATIVE_REGULATION_OF_CELL_CYCLE_CHECKPOINT                     | 1.10 | 0.41 | 0 | 0 | 0 | not significant |
| 9638 | WEBER_METHYLATED_HCP_IN_SPERM_DN                                    | 1.10 | 0.41 | 0 | 0 | 0 | not significant |
| 9639 | GO_CELLULAR_RESPONSE_TO_UV_B                                        | 1.10 | 0.4  | 0 | 0 | 0 | not significant |
| 9640 | GO_HEME_TRANSPORT                                                   | 1.10 | 0.4  | 0 | 0 | 0 | not significant |
| 9641 | GO_OXIDOREDUCTASE_ACTIVITY_ACTING_ON_NAD_P_H_OXYGEN_AS_ACCEPTOR     | 1.10 | 0.39 | 0 | 0 | 0 | not significant |
| 9642 | GO_POSITIVE_REGULATION_OF_TRANSPORT                                 | 1.11 | 0.73 | 0 | 0 | 0 | not significant |
| 9643 | GO_AXON_DEVELOPMENT                                                 | 1.11 | 0.67 | 0 | 0 | 0 | not significant |
| 9644 | GO_CELL_BODY                                                        | 1.11 | 0.67 | 0 | 0 | 0 | not significant |
| 9645 | CUI_TCF21_TARGETS_2_UP                                              | 1.11 | 0.64 | 0 | 0 | 0 | not significant |
| 9646 | GO_DNA_BINDING_TRANSCRIPTION_FACTOR_BINDING                         | 1.11 | 0.64 | 0 | 0 | 0 | not significant |
| 9647 | GO_RNA_POLYMERASE_II_SPECIFIC_DNA_BINDING_TRANSCRIPTION_FACTOR_BIND | 1.11 | 0.64 | 0 | 0 | 0 | not significant |
| 9648 | HELLER_HDAC_TARGETS_DN                                              | 1.11 | 0.64 | 0 | 0 | 0 | not significant |
| 9649 | GO_POSITIVE_REGULATION_OF_MAPK_CASCADE                              | 1.11 | 0.63 | 0 | 0 | 0 | not significant |
| 9650 | GO_SECOND_MESSENGER_MEDIATED_SIGNALING                              | 1.11 | 0.63 | 0 | 0 | 0 | not significant |
| 9651 | FOSTER_KDM1A_TARGETS_DN                                             | 1.11 | 0.62 | 0 | 0 | 0 | not significant |
| 9652 | GO_COATED_VESICLE                                                   | 1.11 | 0.61 | 0 | 0 | 0 | not significant |
| 9653 | GO_POSITIVE_REGULATION_OF_MAP_KINASE_ACTIVITY                       | 1.11 | 0.61 | 0 | 0 | 0 | not significant |
| 9654 | ROZANOV_MMP14_TARGETS_UP                                            | 1.11 | 0.61 | 0 | 0 | 0 | not significant |
| 9655 | HALLMARK_IL2_STAT5_SIGNALING                                        | 1.11 | 0.6  | 0 | 0 | 0 | not significant |
| 9656 | COLDREN_GEFITINIB_RESISTANCE_DN                                     | 1.11 | 0.59 | 0 | 0 | 0 | not significant |
| 9657 | GO_PHAGOCYTOIC_VESICLE                                              | 1.11 | 0.59 | 0 | 0 | 0 | not significant |
| 9658 | GO_NUCLEAR_RECEPTOR_BINDING                                         | 1.11 | 0.58 | 0 | 0 | 0 | not significant |
| 9659 | GO_REGULATION_OF_RHO_PROTEIN_SIGNAL_TRANSDUCTION                    | 1.11 | 0.58 | 0 | 0 | 0 | not significant |
| 9660 | GO_TEMPERATURE_HOMEOSTASIS                                          | 1.11 | 0.58 | 0 | 0 | 0 | not significant |
| 9661 | GO_REGULATION_OF_RAS_PROTEIN_SIGNAL_TRANSDUCTION                    | 1.11 | 0.57 | 0 | 0 | 0 | not significant |
| 9662 | CHR12P13                                                            | 1.11 | 0.56 | 0 | 0 | 0 | not significant |
| 9663 | DAZARD_RESPONSE_TO_UV_SCC_UP                                        | 1.11 | 0.55 | 0 | 0 | 0 | not significant |
| 9664 | MIKKELSEN_NPC_HCP_WITH_H3K4ME3_AND_H3K27ME3                         | 1.11 | 0.55 | 0 | 0 | 0 | not significant |
| 9665 | CHR14Q24                                                            | 1.11 | 0.54 | 0 | 0 | 0 | not significant |
| 9666 | GO_POST_EMBRYONIC_DEVELOPMENT                                       | 1.11 | 0.54 | 0 | 0 | 0 | not significant |
| 9667 | NEMETH_INFLAMMATORY_RESPONSE_LPS_UP                                 | 1.11 | 0.54 | 0 | 0 | 0 | not significant |
| 9668 | REACTOME_TRANSCRIPTIONAL_REGULATION_OF GRANULOPOIESIS               | 1.11 | 0.54 | 0 | 0 | 0 | not significant |
| 9669 | GO_POSITIVE_REGULATION_OF_JUN_KINASE_ACTIVITY                       | 1.11 | 0.53 | 0 | 0 | 0 | not significant |
| 9670 | GO_NEGATIVE_REGULATION_OF_LIPID_METABOLIC_PROCESS                   | 1.11 | 0.52 | 0 | 0 | 0 | not significant |
| 9671 | GO_POSITIVE_REGULATION_OF_EXTRINSIC_APOPTOTIC_SIGNALING_PATHWAY     | 1.11 | 0.52 | 0 | 0 | 0 | not significant |
| 9672 | LEE_TARGETS_OF_PTCH1_AND_SUFU_UP                                    | 1.11 | 0.52 | 0 | 0 | 0 | not significant |
| 9673 | BACOLOD_RESISTANCE_TO_ALKYLATING_AGENTS_DN                          | 1.11 | 0.51 | 0 | 0 | 0 | not significant |
| 9674 | CHR20P11                                                            | 1.11 | 0.51 | 0 | 0 | 0 | not significant |
| 9675 | MUELLER_METHYLATED_IN_GLIOMASTOMA                                   | 1.11 | 0.51 | 0 | 0 | 0 | not significant |
| 9676 | PURBEY_TARGETS_OF_CTBP1_AND_SATB1_UP                                | 1.11 | 0.51 | 0 | 0 | 0 | not significant |
| 9677 | ASTON_MAJOR_DEPRESSIVE_DISORDER_UP                                  | 1.11 | 0.5  | 0 | 0 | 0 | not significant |
| 9678 | GO_ER_NUCLEUS_SIGNALING_PATHWAY                                     | 1.11 | 0.5  | 0 | 0 | 0 | not significant |
| 9679 | GO_NEGATIVE_REGULATION_OF_BLOOD_CIRCULATION                         | 1.11 | 0.5  | 0 | 0 | 0 | not significant |
| 9680 | GO_PHOSPHATIDYLINOSITOL_4_PHOSPHATE_BINDING                         | 1.11 | 0.5  | 0 | 0 | 0 | not significant |
| 9681 | GO_RESPONSE_TO_AMPHETAMINE                                          | 1.11 | 0.5  | 0 | 0 | 0 | not significant |
| 9682 | MARKS_HDAC_TARGETS_UP                                               | 1.11 | 0.5  | 0 | 0 | 0 | not significant |
| 9683 | PID_EPO_PATHWAY                                                     | 1.11 | 0.5  | 0 | 0 | 0 | not significant |
| 9684 | ZAMORA_NOS2_TARGETS_UP                                              | 1.11 | 0.5  | 0 | 0 | 0 | not significant |
| 9685 | REACTOME_TRANSLATION_SYNTHESIS_BY_POLK                              | 1.11 | 0.49 | 0 | 0 | 0 | not significant |
| 9686 | BORLAK_LIVER_CANCER_EGF_UP                                          | 1.11 | 0.48 | 0 | 0 | 0 | not significant |
| 9687 | GAUSSMANN_MLL_AF4_FUSION_TARGETS_G_DN                               | 1.11 | 0.48 | 0 | 0 | 0 | not significant |
| 9688 | GO_NUCLEOBASE_CONTAINING_SMALL_MOLECULE_CATABOLIC_PROCESS           | 1.11 | 0.48 | 0 | 0 | 0 | not significant |
| 9689 | GO_POSTSYNAPTIC_SPECIALIZATION_INTRACELLULAR_COMPONENT              | 1.11 | 0.48 | 0 | 0 | 0 | not significant |

|      |                                                                    |      |      |   |   |   |                 |
|------|--------------------------------------------------------------------|------|------|---|---|---|-----------------|
| 9690 | HEDENFALK_BREAST_CANCER_BRACX_UP                                   | 1.11 | 0.48 | 0 | 0 | 0 | not significant |
| 9691 | NAKAMURA_ADIPOGENESIS_LATE_DN                                      | 1.11 | 0.48 | 0 | 0 | 0 | not significant |
| 9692 | REACTOME_SEMA4D_IN_SEMAPHORIN_SIGNALING                            | 1.11 | 0.48 | 0 | 0 | 0 | not significant |
| 9693 | FINAK_BREAST_CANCER_SDPP_SIGNATURE                                 | 1.11 | 0.47 | 0 | 0 | 0 | not significant |
| 9694 | GO_CELLULAR_RESPONSE_TO_LEUCINE                                    | 1.11 | 0.47 | 0 | 0 | 0 | not significant |
| 9695 | LAMB_CCND1_TARGETS                                                 | 1.11 | 0.47 | 0 | 0 | 0 | not significant |
| 9696 | ZUCCHI_METASTASIS_DN                                               | 1.11 | 0.47 | 0 | 0 | 0 | not significant |
| 9697 | GO_2_OXOGLUTARATE_METABOLIC_PROCESS                                | 1.11 | 0.46 | 0 | 0 | 0 | not significant |
| 9698 | GO_ENDOSOMAL_VESICLE_FUSION                                        | 1.11 | 0.46 | 0 | 0 | 0 | not significant |
| 9699 | GO_MOTOR_NEURON_AXON_GUIDANCE                                      | 1.11 | 0.46 | 0 | 0 | 0 | not significant |
| 9700 | GO_POSITIVE_REGULATION_OF_LEUKOCYTE_ADHESION_TO_VASCULAR_ENDOTHE   | 1.11 | 0.46 | 0 | 0 | 0 | not significant |
| 9701 | GO_REGULATION_OF_ENDOPLASMIC_RETICULUM_UNFOLDED_PROTEIN_RESPONS    | 1.11 | 0.46 | 0 | 0 | 0 | not significant |
| 9702 | HOLLEMAN_VINCISTINE_RESISTANCE_ALL_DN                              | 1.11 | 0.46 | 0 | 0 | 0 | not significant |
| 9703 | PID_S1P_S1P1_PATHWAY                                               | 1.11 | 0.46 | 0 | 0 | 0 | not significant |
| 9704 | PLASARI_NFIC_TARGETS_BASAL_DN                                      | 1.11 | 0.46 | 0 | 0 | 0 | not significant |
| 9705 | HOLLEMAN_DAUNORUBICIN_ALL_DN                                       | 1.11 | 0.45 | 0 | 0 | 0 | not significant |
| 9706 | REACTOME_ATTACHMENT_OF_GPI_ANCHOR_TO_UPAR                          | 1.11 | 0.45 | 0 | 0 | 0 | not significant |
| 9707 | GO_GLYCOSYLPHOSPHATIDYLINOSITOL_N_ACETYLGALACTOSAMINYLTRANSFERASE  | 1.11 | 0.43 | 0 | 0 | 0 | not significant |
| 9708 | GO_REGULATION_OF_MAMMARY_GLAND_EPITHELIAL_CELL_PROLIFERATION       | 1.11 | 0.43 | 0 | 0 | 0 | not significant |
| 9709 | GO_SPHINGOSINE_1_PHOSPHATE_RECEPTOR_SIGNALING_PATHWAY              | 1.11 | 0.43 | 0 | 0 | 0 | not significant |
| 9710 | GO_STEROID_ESTERIFICATION                                          | 1.11 | 0.43 | 0 | 0 | 0 | not significant |
| 9711 | GO_REGULATION_OF_PRESYNAPTIC_CYTOSOLIC_CALCIUM_ION_CONCENTRATION   | 1.11 | 0.42 | 0 | 0 | 0 | not significant |
| 9712 | REACTOME_WNT_MEDIATED_ACTIVATION_OF_DVL                            | 1.11 | 0.42 | 0 | 0 | 0 | not significant |
| 9713 | GO_PHOSPHATIDYLINOSITOL_N_ACETYLGALACTOSAMINYLTRANSFERASE_ACTIVITY | 1.11 | 0.41 | 0 | 0 | 0 | not significant |
| 9714 | REACTOME_TRAIL_SIGNALING                                           | 1.11 | 0.41 | 0 | 0 | 0 | not significant |
| 9715 | GO_POSITIVE_REGULATION_OF_IMMUNE_SYSTEM_PROCESS                    | 1.12 | 0.85 | 0 | 0 | 0 | not significant |
| 9716 | MARSON_BOUND_BY_FOXP3_STIMULATED                                   | 1.12 | 0.84 | 0 | 0 | 0 | not significant |
| 9717 | GO_METAL_ION_TRANSPORT                                             | 1.12 | 0.77 | 0 | 0 | 0 | not significant |
| 9718 | MARTINEZ_RB1_AND_TP53_TARGETS_UP                                   | 1.12 | 0.71 | 0 | 0 | 0 | not significant |
| 9719 | GO_REGULATION_OF_MAP_KINASE_ACTIVITY                               | 1.12 | 0.7  | 0 | 0 | 0 | not significant |
| 9720 | GO_REGULATION_OF_ION_TRANSPORT                                     | 1.12 | 0.69 | 0 | 0 | 0 | not significant |
| 9721 | MULLIGHAN_MLL_SIGNATURE_1_UP                                       | 1.12 | 0.68 | 0 | 0 | 0 | not significant |
| 9722 | GO_NEGATIVE_REGULATION_OF_TRANSPORT                                | 1.12 | 0.67 | 0 | 0 | 0 | not significant |
| 9723 | GO_MUSCLE_ORGAN_DEVELOPMENT                                        | 1.12 | 0.66 | 0 | 0 | 0 | not significant |
| 9724 | CYCLIN_D1_KE_V1_DN                                                 | 1.12 | 0.62 | 0 | 0 | 0 | not significant |
| 9725 | GO_RESPONSE_TO_NUTRIENT                                            | 1.12 | 0.62 | 0 | 0 | 0 | not significant |
| 9726 | KOKKINAKIS_METHIONINE_DEPRIVATION_48HR_UP                          | 1.12 | 0.59 | 0 | 0 | 0 | not significant |
| 9727 | BRUINS_UVC_RESPONSE_MIDDLE                                         | 1.12 | 0.58 | 0 | 0 | 0 | not significant |
| 9728 | CHR11Q12                                                           | 1.12 | 0.57 | 0 | 0 | 0 | not significant |
| 9729 | CHR9P13                                                            | 1.12 | 0.57 | 0 | 0 | 0 | not significant |
| 9730 | GO_REGULATION_OF_RESPONSE_TO_BIOTIC_STIMULUS                       | 1.12 | 0.57 | 0 | 0 | 0 | not significant |
| 9731 | GO_MAMMARY_GLAND_DEVELOPMENT                                       | 1.12 | 0.56 | 0 | 0 | 0 | not significant |
| 9732 | GO_POSITIVE_REGULATION_OF_SMALL_MOLECULE_METABOLIC_PROCESS         | 1.12 | 0.56 | 0 | 0 | 0 | not significant |
| 9733 | MENSE_HYPOXIA_UP                                                   | 1.12 | 0.56 | 0 | 0 | 0 | not significant |
| 9734 | NELSON_RESPONSE_TO_ANDROGEN_UP                                     | 1.12 | 0.55 | 0 | 0 | 0 | not significant |
| 9735 | BEIER_GLIOMA_STEM_CELL_DN                                          | 1.12 | 0.54 | 0 | 0 | 0 | not significant |
| 9736 | BRUNO_HEMATOPOIESIS                                                | 1.12 | 0.54 | 0 | 0 | 0 | not significant |
| 9737 | CHR15Q25                                                           | 1.12 | 0.54 | 0 | 0 | 0 | not significant |
| 9738 | CHR6Q24                                                            | 1.12 | 0.54 | 0 | 0 | 0 | not significant |
| 9739 | GO_BLOOD_MICROPARTICLE                                             | 1.12 | 0.53 | 0 | 0 | 0 | not significant |
| 9740 | GO_PHAGOSOME_MATURATION                                            | 1.12 | 0.53 | 0 | 0 | 0 | not significant |
| 9741 | GO_POSITIVE_REGULATION_OF_B_CELL_PROLIFERATION                     | 1.12 | 0.52 | 0 | 0 | 0 | not significant |
| 9742 | GO_POSITIVE_REGULATION_OF_INSULIN_SECRETION                        | 1.12 | 0.52 | 0 | 0 | 0 | not significant |
| 9743 | GO_CILIUM_MOVEMENT                                                 | 1.12 | 0.51 | 0 | 0 | 0 | not significant |
| 9744 | GO_MONOAMINE_TRANSPORT                                             | 1.12 | 0.51 | 0 | 0 | 0 | not significant |
| 9745 | GO_REGULATION_OF_JUN_KINASE_ACTIVITY                               | 1.12 | 0.51 | 0 | 0 | 0 | not significant |
| 9746 | GUILLAUMOND_KLF10_TARGETS_DN                                       | 1.12 | 0.51 | 0 | 0 | 0 | not significant |
| 9747 | LUI_THYROID_CANCER_CLUSTER_3                                       | 1.12 | 0.51 | 0 | 0 | 0 | not significant |
| 9748 | MURAKAMI_UV_RESPONSE_6HR_UP                                        | 1.12 | 0.51 | 0 | 0 | 0 | not significant |
| 9749 | PID_FAS_PATHWAY                                                    | 1.12 | 0.51 | 0 | 0 | 0 | not significant |
| 9750 | REACTOME_FGFR1_MUTANT_RECEPTOR_ACTIVATION                          | 1.12 | 0.51 | 0 | 0 | 0 | not significant |
| 9751 | BILANGES_SERUM_AND_RAPAMYCIN_SENSITIVE_GENES                       | 1.12 | 0.5  | 0 | 0 | 0 | not significant |
| 9752 | BIOCARTA_BCR_PATHWAY                                               | 1.12 | 0.5  | 0 | 0 | 0 | not significant |
| 9753 | GO_CARDIAC_MUSCLE_CELL_ACTION_POTENTIAL_INVOLVED_IN_CONTRACTION    | 1.12 | 0.5  | 0 | 0 | 0 | not significant |
| 9754 | GO_ORGANELLE_MEMBRANE_CONTACT_SITE                                 | 1.12 | 0.5  | 0 | 0 | 0 | not significant |
| 9755 | GO_REGULATION_OF_RECEPTOR_LOCALIZATION_TO_SYNAPSE                  | 1.12 | 0.5  | 0 | 0 | 0 | not significant |
| 9756 | GO_THYMOCYTE_APOPTOTIC_PROCESS                                     | 1.12 | 0.5  | 0 | 0 | 0 | not significant |
| 9757 | GUENTHER_GROWTH_SPHERICAL_VS_ADHERENT_DN                           | 1.12 | 0.5  | 0 | 0 | 0 | not significant |
| 9758 | KEGG_BUTANOATE_METABOLISM                                          | 1.12 | 0.5  | 0 | 0 | 0 | not significant |
| 9759 | CHR4Q32                                                            | 1.12 | 0.49 | 0 | 0 | 0 | not significant |
| 9760 | GAVIN_PDE3B_TARGETS                                                | 1.12 | 0.49 | 0 | 0 | 0 | not significant |
| 9761 | GO_SENSORY_PERCEPTION_OF_CHEMICAL_STIMULUS                         | 1.12 | 0.49 | 0 | 0 | 0 | not significant |
| 9762 | GO_TRANSMISSION_OF_NERVE_IMPULSE                                   | 1.12 | 0.49 | 0 | 0 | 0 | not significant |
| 9763 | KANNAN_TP53_TARGETS_DN                                             | 1.12 | 0.49 | 0 | 0 | 0 | not significant |
| 9764 | MEINHOLD_OVARIAN_CANCER_LOW_GRADE_UP                               | 1.12 | 0.49 | 0 | 0 | 0 | not significant |
| 9765 | GO_FRIZZLED_BINDING                                                | 1.12 | 0.48 | 0 | 0 | 0 | not significant |
| 9766 | GO_NUCLEOTIDE_SUGAR_TRANSMEMBRANE_TRANSPORT                        | 1.12 | 0.48 | 0 | 0 | 0 | not significant |
| 9767 | GO_REGULATION_OF_TRANSCRIPTION_FROM_RNA_POLYMERASE_II_PROMOTER     | 1.12 | 0.48 | 0 | 0 | 0 | not significant |
| 9768 | WU_ALZHEIMER_DISEASE_DN                                            | 1.12 | 0.48 | 0 | 0 | 0 | not significant |
| 9769 | GO_CALCIUM_MEDIATED_SIGNALING_USING_INTRACELLULAR_CALCIUM_SOURCE   | 1.12 | 0.47 | 0 | 0 | 0 | not significant |
| 9770 | GO_CILIUM_OR_FLAGELLUM_DEPENDENT_CELL_MOTILITY                     | 1.12 | 0.47 | 0 | 0 | 0 | not significant |
| 9771 | GO_PROFILIN_BINDING                                                | 1.12 | 0.47 | 0 | 0 | 0 | not significant |
| 9772 | GO_REGULATION_OF_LEUKOCYTE_ADHESION_TO_VASCULAR_ENDOTHELIAL_CELI   | 1.12 | 0.47 | 0 | 0 | 0 | not significant |
| 9773 | GO_RESPONSE_TO_REDOX_STATE                                         | 1.12 | 0.47 | 0 | 0 | 0 | not significant |
| 9774 | GO_SPHINGOLIPID_MEDIATED_SIGNALING_PATHWAY                         | 1.12 | 0.47 | 0 | 0 | 0 | not significant |
| 9775 | GO_TRICARBOXYLIC_ACID_CYCLE_ENZYME_COMPLEX                         | 1.12 | 0.47 | 0 | 0 | 0 | not significant |
| 9776 | WANG_IMMORTALIZED_BY_HOXA9_AND_MEIS1_DN                            | 1.12 | 0.47 | 0 | 0 | 0 | not significant |
| 9777 | GO_POSITIVE_REGULATION_OF_HISTONE_H3_K9_METHYLATION                | 1.12 | 0.46 | 0 | 0 | 0 | not significant |
| 9778 | GO_REGULATION_OF_TOLL_LIKE_RECEPTOR_9_SIGNALING_PATHWAY            | 1.12 | 0.46 | 0 | 0 | 0 | not significant |
| 9779 | GO_SECONDARY_METABOLITE_BIOSYNTHETIC_PROCESS                       | 1.12 | 0.46 | 0 | 0 | 0 | not significant |
| 9780 | LIU_VAV3_PROSTATE_CARCINOGENESIS_DN                                | 1.12 | 0.46 | 0 | 0 | 0 | not significant |
| 9781 | REACTOME_DISEASES_OF_IMMUNE_SYSTEM                                 | 1.12 | 0.46 | 0 | 0 | 0 | not significant |
| 9782 | GO_EPOXIDE_HYDROLASE_ACTIVITY                                      | 1.12 | 0.45 | 0 | 0 | 0 | not significant |
| 9783 | GO_LYMPH_VESSEL_MORPHOGENESIS                                      | 1.12 | 0.45 | 0 | 0 | 0 | not significant |
| 9784 | GO_POSITIVE_REGULATION_OF_CREB_TRANSCRIPTION_FACTOR_ACTIVITY       | 1.12 | 0.45 | 0 | 0 | 0 | not significant |
| 9785 | GO_REGULATION_OF_GLIAL_CELL_MIGRATION                              | 1.12 | 0.45 | 0 | 0 | 0 | not significant |
| 9786 | REACTOME_PHOSPHORYLATION_OF_CD3_AND_TCR_ZETA_CHAINS                | 1.12 | 0.45 | 0 | 0 | 0 | not significant |
| 9787 | GO_CYCLASE_ACTIVITY                                                | 1.12 | 0.44 | 0 | 0 | 0 | not significant |
| 9788 | GO_ENDORIBONUCLEASE_ACTIVITY_PRODUCING_3_PHOSPHOMONOESTERS         | 1.12 | 0.44 | 0 | 0 | 0 | not significant |
| 9789 | GO_MELANOSOME_ASSEMBLY                                             | 1.12 | 0.44 | 0 | 0 | 0 | not significant |
| 9790 | GO_HORMONE_CATABOLIC_PROCESS                                       | 1.12 | 0.43 | 0 | 0 | 0 | not significant |
| 9791 | GO_POSITIVE_REGULATION_OF_CHEMOKINE_SECRETION                      | 1.12 | 0.43 | 0 | 0 | 0 | not significant |
| 9792 | MCCABE_HOXC6_TARGETS_UP                                            | 1.12 | 0.43 | 0 | 0 | 0 | not significant |
| 9793 | GO_CELL_AGGREGATION                                                | 1.12 | 0.41 | 0 | 0 | 0 | not significant |
| 9794 | GO_IRON_COORDINATION_ENTITY_TRANSPORT                              | 1.12 | 0.41 | 0 | 0 | 0 | not significant |
| 9795 | GO_POSITIVE_REGULATION_OF_INTERLEUKIN_17_PRODUCTION                | 1.12 | 0.41 | 0 | 0 | 0 | not significant |
| 9796 | GO_MEIOTIC_COHESIN_COMPLEX                                         | 1.12 | 0.39 | 0 | 0 | 0 | not significant |
| 9797 | GO_REGULATION_OF_INTRACELLULAR_SIGNAL_TRANSDUCTION                 | 1.13 | 1.04 | 0 | 0 | 0 | not significant |
| 9798 | GO_POSITIVE_REGULATION_OF_DEVELOPMENTAL_PROCESS                    | 1.13 | 0.91 | 0 | 0 | 0 | not significant |

|      |                                                                    |      |      |   |   |   |                 |
|------|--------------------------------------------------------------------|------|------|---|---|---|-----------------|
| 9799 | GO_MEMBRANE_PROTEIN_COMPLEX                                        | 1.13 | 0.9  | 0 | 0 | 0 | not significant |
| 9800 | GO_ION_HOMEOSTASIS                                                 | 1.13 | 0.81 | 0 | 0 | 0 | not significant |
| 9801 | GO_POSITIVE_REGULATION_OF_CELL_DEATH                               | 1.13 | 0.81 | 0 | 0 | 0 | not significant |
| 9802 | GO_SEQUENCE_SPECIFIC_DOUBLE_STRANDED_DNA_BINDING                   | 1.13 | 0.8  | 0 | 0 | 0 | not significant |
| 9803 | GO_REGULATION_OF_TRANSMEMBRANE_TRANSPORT                           | 1.13 | 0.76 | 0 | 0 | 0 | not significant |
| 9804 | GO_SMALL_MOLECULE_CATABOLIC_PROCESS                                | 1.13 | 0.72 | 0 | 0 | 0 | not significant |
| 9805 | CHARAFE_BREAST_CANCER_LUMINAL_VS_BASAL_UP                          | 1.13 | 0.7  | 0 | 0 | 0 | not significant |
| 9806 | MEISSNER_NPC_HCP_WITH_H3K4ME2                                      | 1.13 | 0.69 | 0 | 0 | 0 | not significant |
| 9807 | GO_RECYCLING_ENDOSOME                                              | 1.13 | 0.68 | 0 | 0 | 0 | not significant |
| 9808 | HALLMARK_ADIPOGENESIS                                              | 1.13 | 0.67 | 0 | 0 | 0 | not significant |
| 9809 | GO_TRANS_GOLGI_NETWORK                                             | 1.13 | 0.66 | 0 | 0 | 0 | not significant |
| 9810 | GO_PROTEIN_DNA_COMPLEX                                             | 1.13 | 0.65 | 0 | 0 | 0 | not significant |
| 9811 | OISHI_CHOLANGIOMA_STEM_CELL_LIKE_DN                                | 1.13 | 0.65 | 0 | 0 | 0 | not significant |
| 9812 | SANSOM_APC_TARGETS                                                 | 1.13 | 0.64 | 0 | 0 | 0 | not significant |
| 9813 | REACTOME_DEATH_RECEPTOR_SIGNALLING                                 | 1.13 | 0.63 | 0 | 0 | 0 | not significant |
| 9814 | GO_SODIUM_ION_TRANSPORT                                            | 1.13 | 0.62 | 0 | 0 | 0 | not significant |
| 9815 | NING_CHRONIC_OBSTRUCTIVE_PULMONARY_DISEASE_DN                      | 1.13 | 0.62 | 0 | 0 | 0 | not significant |
| 9816 | TSAL_RESPONSE_TO_IONIZING_RADIATION                                | 1.13 | 0.62 | 0 | 0 | 0 | not significant |
| 9817 | VERHAAK_GLIOMASTOMA_NEURAL                                         | 1.13 | 0.62 | 0 | 0 | 0 | not significant |
| 9818 | REACTOME_CELL_CELL_COMMUNICATION                                   | 1.13 | 0.61 | 0 | 0 | 0 | not significant |
| 9819 | WAKABAYASHI_ADIPOGENESIS_PPARG_RXRA_BOUND_36HR                     | 1.13 | 0.61 | 0 | 0 | 0 | not significant |
| 9820 | GO_INTEGRIN_MEDIATED_SIGNALING_PATHWAY                             | 1.13 | 0.6  | 0 | 0 | 0 | not significant |
| 9821 | WEIGEL_OXIDATIVE_STRESS_BY_HNE_AND_TBH                             | 1.13 | 0.6  | 0 | 0 | 0 | not significant |
| 9822 | GO_INOSITOL_LIPID_MEDIATED_SIGNALING                               | 1.13 | 0.59 | 0 | 0 | 0 | not significant |
| 9823 | LINDVALL_IMMORTALIZED_BY_TERT_DN                                   | 1.13 | 0.58 | 0 | 0 | 0 | not significant |
| 9824 | GO_POSITIVE_REGULATION_OF_CARBOHYDRATE_METABOLIC_PROCESS           | 1.13 | 0.57 | 0 | 0 | 0 | not significant |
| 9825 | YAO_TEMPORAL_RESPONSE_TO_PROGESTERONE_CLUSTER_9                    | 1.13 | 0.57 | 0 | 0 | 0 | not significant |
| 9826 | GO_POSITIVE_REGULATION_OF_EXOCYTOSIS                               | 1.13 | 0.56 | 0 | 0 | 0 | not significant |
| 9827 | GO_REGULATION_OF_PLASMA_LIPOPROTEIN_PARTICLE_LEVELS                | 1.13 | 0.56 | 0 | 0 | 0 | not significant |
| 9828 | GO_REGULATION_OF_TUBE_SIZE                                         | 1.13 | 0.56 | 0 | 0 | 0 | not significant |
| 9829 | KYNG_RESPONSE_TO_H2O2                                              | 1.13 | 0.56 | 0 | 0 | 0 | not significant |
| 9830 | PID_LYSOPHOSPHOLIPID_PATHWAY                                       | 1.13 | 0.56 | 0 | 0 | 0 | not significant |
| 9831 | ROSS_AML_WITH_AML1_ETO_FUSION                                      | 1.13 | 0.56 | 0 | 0 | 0 | not significant |
| 9832 | REACTOME_PHASE_II_CONJUGATION_OF_COMPOUNDS                         | 1.13 | 0.55 | 0 | 0 | 0 | not significant |
| 9833 | REACTOME_SIGNALING_BY_NON_RECEPTOR_TYROSINE_KINASES                | 1.13 | 0.55 | 0 | 0 | 0 | not significant |
| 9834 | RIZKI_TUMOR_INVASIVENESS_2D_UP                                     | 1.13 | 0.55 | 0 | 0 | 0 | not significant |
| 9835 | GO_GLUCOSE_IMPORT                                                  | 1.13 | 0.54 | 0 | 0 | 0 | not significant |
| 9836 | JAK2_DN.V1_UP                                                      | 1.13 | 0.54 | 0 | 0 | 0 | not significant |
| 9837 | KOHOUTEK_CCNT1_TARGETS                                             | 1.13 | 0.54 | 0 | 0 | 0 | not significant |
| 9838 | ONO_AML1_TARGETS_DN                                                | 1.13 | 0.54 | 0 | 0 | 0 | not significant |
| 9839 | GO_LONG_CHAIN_FATTY_ACID_TRANSPORT                                 | 1.13 | 0.53 | 0 | 0 | 0 | not significant |
| 9840 | GO_NEGATIVE_REGULATION_OF_OXIDOREDUCTASE_ACTIVITY                  | 1.13 | 0.53 | 0 | 0 | 0 | not significant |
| 9841 | GO_POSITIVE_REGULATION_OF_LIPASE_ACTIVITY                          | 1.13 | 0.53 | 0 | 0 | 0 | not significant |
| 9842 | REACTOME_ROS_AND_RNS_PRODUCTION_IN_PHAGOCYTES                      | 1.13 | 0.53 | 0 | 0 | 0 | not significant |
| 9843 | XU_HGF_TARGETS_INDUCED_BY_AKT_1_6HR                                | 1.13 | 0.53 | 0 | 0 | 0 | not significant |
| 9844 | GO_INTERLEUKIN_12_PRODUCTION                                       | 1.13 | 0.52 | 0 | 0 | 0 | not significant |
| 9845 | GO_REGULATION_OF_ENDOPLASMIC_RETICULUM_STRESS_INDUCED_INTRINSIC_AI | 1.13 | 0.52 | 0 | 0 | 0 | not significant |
| 9846 | CHIARETTI_T_ALL_RELAPSE_PROGNOSIS                                  | 1.13 | 0.51 | 0 | 0 | 0 | not significant |
| 9847 | GO_AMYLOID_PRECURSOR_PROTEIN_CATABOLIC_PROCESS                     | 1.13 | 0.51 | 0 | 0 | 0 | not significant |
| 9848 | GO_BRUSH_BORDER_MEMBRANE                                           | 1.13 | 0.51 | 0 | 0 | 0 | not significant |
| 9849 | WANG_RESPONSE_TO_FORSKOLIN_UP                                      | 1.13 | 0.51 | 0 | 0 | 0 | not significant |
| 9850 | GO_MANNOSYLTRANSFERASE_ACTIVITY                                    | 1.13 | 0.5  | 0 | 0 | 0 | not significant |
| 9851 | GO_NEURON_RECOGNITION                                              | 1.13 | 0.5  | 0 | 0 | 0 | not significant |
| 9852 | GO_SENSORY_PERCEPTION_OF_TASTE                                     | 1.13 | 0.5  | 0 | 0 | 0 | not significant |
| 9853 | HUNSBERGER_EXERCISE_REGULATED_GENES                                | 1.13 | 0.5  | 0 | 0 | 0 | not significant |
| 9854 | GO_BROWN_FAT_CELL_DIFFERENTIATION                                  | 1.13 | 0.49 | 0 | 0 | 0 | not significant |
| 9855 | GO_NEUROTRANSMITTER_UPTAKE                                         | 1.13 | 0.49 | 0 | 0 | 0 | not significant |
| 9856 | REACTOME_THE_NLRP3_INFLAMMASOME                                    | 1.13 | 0.49 | 0 | 0 | 0 | not significant |
| 9857 | GEISS_RESPONSE_TO_DSRNA_DN                                         | 1.13 | 0.48 | 0 | 0 | 0 | not significant |
| 9858 | CHR15Q11                                                           | 1.13 | 0.47 | 0 | 0 | 0 | not significant |
| 9859 | GO_1_PHOSPHATIDYLINOSITOL_4_KINASE_ACTIVITY                        | 1.13 | 0.47 | 0 | 0 | 0 | not significant |
| 9860 | GO_NEGATIVE_REGULATION_OF_LIPASE_ACTIVITY                          | 1.13 | 0.47 | 0 | 0 | 0 | not significant |
| 9861 | GO_SPECIFICATION_OF_ANIMAL_ORGAN_IDENTITY                          | 1.13 | 0.47 | 0 | 0 | 0 | not significant |
| 9862 | SILIGAN_TARGETS_OF_EWS_FLI1_FUSION_DN                              | 1.13 | 0.47 | 0 | 0 | 0 | not significant |
| 9863 | ZHAN_VARIABLE_EARLY_DIFFERENTIATION_GENES_UP                       | 1.13 | 0.46 | 0 | 0 | 0 | not significant |
| 9864 | GO_LATERAL_ELEMENT                                                 | 1.13 | 0.45 | 0 | 0 | 0 | not significant |
| 9865 | GO_POSITIVE_REGULATION_OF_ACTIVIN_RECEPTOR_SIGNALING_PATHWAY       | 1.13 | 0.45 | 0 | 0 | 0 | not significant |
| 9866 | GO_POST_ANAL_TAIL_MORPHOGENESIS                                    | 1.13 | 0.43 | 0 | 0 | 0 | not significant |
| 9867 | GO_WATER_TRANSPORT                                                 | 1.13 | 0.43 | 0 | 0 | 0 | not significant |
| 9868 | GO_PLASMA_MEMBRANE_REGION                                          | 1.14 | 0.85 | 0 | 0 | 0 | not significant |
| 9869 | ENK_UV_RESPONSE_EPIDERMIS_UP                                       | 1.14 | 0.73 | 0 | 0 | 0 | not significant |
| 9870 | ZHOU_INFLAMMATORY_RESPONSE_FIMA_UP                                 | 1.14 | 0.73 | 0 | 0 | 0 | not significant |
| 9871 | GO_RESPONSE_TO_ANTIBIOTIC                                          | 1.14 | 0.71 | 0 | 0 | 0 | not significant |
| 9872 | CHR6P21                                                            | 1.14 | 0.7  | 0 | 0 | 0 | not significant |
| 9873 | GO_NIK_NF_KAPPAB_SIGNALING                                         | 1.14 | 0.7  | 0 | 0 | 0 | not significant |
| 9874 | GO_DEFENSE_RESPONSE_TO_VIRUS                                       | 1.14 | 0.69 | 0 | 0 | 0 | not significant |
| 9875 | GO_COFACTOR_BIOSYNTHETIC_PROCESS                                   | 1.14 | 0.68 | 0 | 0 | 0 | not significant |
| 9876 | GO_PHOSPHATASE_BINDING                                             | 1.14 | 0.68 | 0 | 0 | 0 | not significant |
| 9877 | GO_LYASE_ACTIVITY                                                  | 1.14 | 0.67 | 0 | 0 | 0 | not significant |
| 9878 | GO_PHOSPHOLIPID_BIOSYNTHETIC_PROCESS                               | 1.14 | 0.67 | 0 | 0 | 0 | not significant |
| 9879 | GO_REGULATION_OF_SIGNALING_RECEPTOR_ACTIVITY                       | 1.14 | 0.67 | 0 | 0 | 0 | not significant |
| 9880 | CHIARADONNA_NEOPLASTIC_TRANSFORMATION_KRAS_UP                      | 1.14 | 0.66 | 0 | 0 | 0 | not significant |
| 9881 | GO_NEGATIVE_REGULATION_OF_CELL_GROWTH                              | 1.14 | 0.65 | 0 | 0 | 0 | not significant |
| 9882 | JUBAN_TARGETS_OF_SPH1_AND_FLI1_UP                                  | 1.14 | 0.65 | 0 | 0 | 0 | not significant |
| 9883 | HALLMARK_UV_RESPONSE_UP                                            | 1.14 | 0.64 | 0 | 0 | 0 | not significant |
| 9884 | GO_REGULATION_OF_EXTRINSIC_APOPTOTIC_SIGNALING_PATHWAY_VIA_DEATH_I | 1.14 | 0.61 | 0 | 0 | 0 | not significant |
| 9885 | SENESE_HDAC2_TARGETS_DN                                            | 1.14 | 0.61 | 0 | 0 | 0 | not significant |
| 9886 | BRCA1_DN.V1_DN                                                     | 1.14 | 0.6  | 0 | 0 | 0 | not significant |
| 9887 | FRIDMAN_SENESCE_UP                                                 | 1.14 | 0.6  | 0 | 0 | 0 | not significant |
| 9888 | GO_REGULATION_OF_LIPID_LOCALIZATION                                | 1.14 | 0.6  | 0 | 0 | 0 | not significant |
| 9889 | GO_SENSORY_PERCEPTION_OF_MECHANICAL_STIMULUS                       | 1.14 | 0.6  | 0 | 0 | 0 | not significant |
| 9890 | GO_NEGATIVE_REGULATION_OF_VIRAL_GENOME_REPLICATION                 | 1.14 | 0.59 | 0 | 0 | 0 | not significant |
| 9891 | GO_OSTEOCLAST_DIFFERENTIATION                                      | 1.14 | 0.59 | 0 | 0 | 0 | not significant |
| 9892 | VART_KSHV_INFECTION_ANGIOGENIC_MARKERS_UP                          | 1.14 | 0.59 | 0 | 0 | 0 | not significant |
| 9893 | CHR3Q27                                                            | 1.14 | 0.58 | 0 | 0 | 0 | not significant |
| 9894 | GO_INSULIN_SECRETION_INVOLVED_IN_CELLULAR_RESPONSE_TO_GLUCOSE_STIM | 1.14 | 0.58 | 0 | 0 | 0 | not significant |
| 9895 | GO_PLASMA_LIPOPROTEIN_PARTICLE_CLEARANCE                           | 1.14 | 0.58 | 0 | 0 | 0 | not significant |
| 9896 | PID_BCR_5PATHWAY                                                   | 1.14 | 0.58 | 0 | 0 | 0 | not significant |
| 9897 | PTEN_DN.V1_DN                                                      | 1.14 | 0.58 | 0 | 0 | 0 | not significant |
| 9898 | GO_TRANSMEMBRANE_RECEPTOR_PROTEIN_KINASE_ACTIVITY                  | 1.14 | 0.57 | 0 | 0 | 0 | not significant |
| 9899 | REACTOME_EXTENSION_OF_TELOMERES                                    | 1.14 | 0.57 | 0 | 0 | 0 | not significant |
| 9900 | BIOCARTA_NTH1_PATHWAY                                              | 1.14 | 0.56 | 0 | 0 | 0 | not significant |
| 9901 | GO_ENDOCRINE_PROCESS                                               | 1.14 | 0.56 | 0 | 0 | 0 | not significant |
| 9902 | GO_POSITIVE_REGULATION_OF_COAGULATION                              | 1.14 | 0.56 | 0 | 0 | 0 | not significant |
| 9903 | GO_POSITIVE_REGULATION_OF_LIPID_LOCALIZATION                       | 1.14 | 0.56 | 0 | 0 | 0 | not significant |
| 9904 | GO_REGULATION_OF_DEFENSE_RESPONSE_TO_VIRUS_BY_HOST                 | 1.14 | 0.56 | 0 | 0 | 0 | not significant |
| 9905 | MATZUK_SPERMATOZOA                                                 | 1.14 | 0.56 | 0 | 0 | 0 | not significant |
| 9906 | KEGG_GLUTATHIONE_METABOLISM                                        | 1.14 | 0.55 | 0 | 0 | 0 | not significant |
| 9907 | LIU_VAV3_PROSTATE_CARCINOGENESIS_UP                                | 1.14 | 0.55 | 0 | 0 | 0 | not significant |

|       |                                                                   |      |      |   |   |   |                 |
|-------|-------------------------------------------------------------------|------|------|---|---|---|-----------------|
| 9908  | MCLACHLAN_DENTAL_CARIES_DN                                        | 1.14 | 0.55 | 0 | 0 | 0 | not significant |
| 9909  | REACTOME_TBC_RABGAPS                                              | 1.14 | 0.55 | 0 | 0 | 0 | not significant |
| 9910  | GO_POSITIVE_REGULATION_OF_LIPID_TRANSPORT                         | 1.14 | 0.54 | 0 | 0 | 0 | not significant |
| 9911  | GO_REGULATION_OF_LYMPHOCYTE_MIGRATION                             | 1.14 | 0.54 | 0 | 0 | 0 | not significant |
| 9912  | GO_REPLISOME                                                      | 1.14 | 0.54 | 0 | 0 | 0 | not significant |
| 9913  | DUTTA_APOPTOSIS_VIA_NFKB                                          | 1.14 | 0.53 | 0 | 0 | 0 | not significant |
| 9914  | KANG_FLUOROURACIL_RESISTANCE_UP                                   | 1.14 | 0.53 | 0 | 0 | 0 | not significant |
| 9915  | MIKKELSEN_IPS_ICP_WITH_H3K4ME3_AND_H327ME3                        | 1.14 | 0.53 | 0 | 0 | 0 | not significant |
| 9916  | GO_EXODEOXYRIBONUCLEASE_ACTIVITY                                  | 1.14 | 0.52 | 0 | 0 | 0 | not significant |
| 9917  | GO_NBAF_COMPLEX                                                   | 1.14 | 0.52 | 0 | 0 | 0 | not significant |
| 9918  | GO_NEUROMUSCULAR_JUNCTION_DEVELOPMENT                             | 1.14 | 0.52 | 0 | 0 | 0 | not significant |
| 9919  | GO_OSTEOBLAST_PROLIFERATION                                       | 1.14 | 0.52 | 0 | 0 | 0 | not significant |
| 9920  | GO_POSITIVE_REGULATION_OF_BLOOD_CIRCULATION                       | 1.14 | 0.52 | 0 | 0 | 0 | not significant |
| 9921  | GO_RACEMASE_AND_EPIMERASE_ACTIVITY_ACTING_ON_CARBOHYDRATES_AND_I  | 1.14 | 0.52 | 0 | 0 | 0 | not significant |
| 9922  | MARSHALL_VIRAL_INFECTION_RESPONSE_DN                              | 1.14 | 0.52 | 0 | 0 | 0 | not significant |
| 9923  | SIMBULAN_PARP1_TARGETS_UP                                         | 1.14 | 0.52 | 0 | 0 | 0 | not significant |
| 9924  | GO_ARACHIDONIC_ACID_METABOLIC_PROCESS                             | 1.14 | 0.51 | 0 | 0 | 0 | not significant |
| 9925  | GO_LABYRINTHINE_LAYER_BLOOD_VESSEL_DEVELOPMENT                    | 1.14 | 0.51 | 0 | 0 | 0 | not significant |
| 9926  | GO_PEPTIDYL_SERINE_DEPHOSPHORYLATION                              | 1.14 | 0.51 | 0 | 0 | 0 | not significant |
| 9927  | GO_SALIVARY_GLAND_DEVELOPMENT                                     | 1.14 | 0.51 | 0 | 0 | 0 | not significant |
| 9928  | KUROZUMI_RESPONSE_TO_ONCOCYTIC_VIRUS                              | 1.14 | 0.5  | 0 | 0 | 0 | not significant |
| 9929  | PEDERSEN_METASTASIS_BY_ERBB2_ISOFORM_3                            | 1.14 | 0.5  | 0 | 0 | 0 | not significant |
| 9930  | GO_INTERLEUKIN_35_MEDIATED_SIGNALING_PATHWAY                      | 1.14 | 0.49 | 0 | 0 | 0 | not significant |
| 9931  | GO_NEGATIVE_REGULATION_OF_SMOOTH_MUSCLE_CELL_DIFFERENTIATION      | 1.14 | 0.49 | 0 | 0 | 0 | not significant |
| 9932  | GO_NEUTRAL_LIPID_CATABOLIC_PROCESS                                | 1.14 | 0.49 | 0 | 0 | 0 | not significant |
| 9933  | MATTHEWS_SKIN_CARCINOGENESIS_VIA_JUN                              | 1.14 | 0.49 | 0 | 0 | 0 | not significant |
| 9934  | ZHAN_MULTIPLE_MYELOMA_MS_UP                                       | 1.14 | 0.49 | 0 | 0 | 0 | not significant |
| 9935  | GO_EXCITATORY_EXTRACELLULAR_LIGAND_GATED_ION_CHANNEL_ACTIVITY     | 1.14 | 0.48 | 0 | 0 | 0 | not significant |
| 9936  | GO_NEGATIVE_REGULATION_OF_ANOIKIS                                 | 1.14 | 0.48 | 0 | 0 | 0 | not significant |
| 9937  | GO_PLATELET_ALPHA_GRANULE_MEMBRANE                                | 1.14 | 0.48 | 0 | 0 | 0 | not significant |
| 9938  | SCHRAETS_MLL_TARGETS_DN                                           | 1.14 | 0.48 | 0 | 0 | 0 | not significant |
| 9939  | TANG_SENESCENCE_TP53_TARGETS_UP                                   | 1.14 | 0.48 | 0 | 0 | 0 | not significant |
| 9940  | GO_FAT_PAD_DEVELOPMENT                                            | 1.14 | 0.47 | 0 | 0 | 0 | not significant |
| 9941  | GO_REGULATION_OF_BLOOD_VESSEL_REMODELING                          | 1.14 | 0.47 | 0 | 0 | 0 | not significant |
| 9942  | GO_ASTROCYTE_PROJECTION                                           | 1.14 | 0.46 | 0 | 0 | 0 | not significant |
| 9943  | GO_DEOXYRIBONUCLEOTIDE_BINDING                                    | 1.14 | 0.46 | 0 | 0 | 0 | not significant |
| 9944  | GO_POSITIVE_REGULATION_OF_NATURAL_KILLER_CELL_DIFFERENTIATION     | 1.14 | 0.46 | 0 | 0 | 0 | not significant |
| 9945  | KYNG_ENVIRONMENTAL_STRESS_RESPONSE_NOT_BY_4NQO_IN_OLD             | 1.14 | 0.46 | 0 | 0 | 0 | not significant |
| 9946  | GO_POSITIVE_REGULATION_OF_IMMUNOGLOBULIN_SECRETION                | 1.14 | 0.45 | 0 | 0 | 0 | not significant |
| 9947  | GO_STORE_OPERATED_CALCIIUM_CHANNEL_ACTIVITY                       | 1.14 | 0.45 | 0 | 0 | 0 | not significant |
| 9948  | GO_MELANIN_BIOSYNTHEIC_PROCESS                                    | 1.14 | 0.44 | 0 | 0 | 0 | not significant |
| 9949  | GO_APOPTOTIC_SIGNALING_PATHWAY                                    | 1.15 | 0.9  | 0 | 0 | 0 | not significant |
| 9950  | GO_CELL_MORPHOGENESIS_INVOLVED_IN_NEURON_DIFFERENTIATION          | 1.15 | 0.82 | 0 | 0 | 0 | not significant |
| 9951  | BOCHKIS_FOXA2_TARGETS                                             | 1.15 | 0.8  | 0 | 0 | 0 | not significant |
| 9952  | YAGI_AML_WITH_T_8_21_TRANSLOCATION                                | 1.15 | 0.76 | 0 | 0 | 0 | not significant |
| 9953  | GO_HORMONE_MEDIATED_SIGNALING_PATHWAY                             | 1.15 | 0.7  | 0 | 0 | 0 | not significant |
| 9954  | GO_SULFUR_COMPOUND_BINDING                                        | 1.15 | 0.68 | 0 | 0 | 0 | not significant |
| 9955  | WIERENGA_STAT5A_TARGETS_DN                                        | 1.15 | 0.67 | 0 | 0 | 0 | not significant |
| 9956  | TGFB_UP.V1_DN                                                     | 1.15 | 0.66 | 0 | 0 | 0 | not significant |
| 9957  | GO_CELLULAR_RESPONSE_TO_CARBOHYDRATE_STIMULUS                     | 1.15 | 0.65 | 0 | 0 | 0 | not significant |
| 9958  | GO_MULTI_MULTICELLULAR_ORGANISM_PROCESS                           | 1.15 | 0.65 | 0 | 0 | 0 | not significant |
| 9959  | KEGG_CYTOKINE_CYTOKINE_RECEPTOR_INTERACTION                       | 1.15 | 0.65 | 0 | 0 | 0 | not significant |
| 9960  | GO_ERBB_SIGNALING_PATHWAY                                         | 1.15 | 0.64 | 0 | 0 | 0 | not significant |
| 9961  | GO_NEGATIVE_REGULATION_OF_NF_KAPPAB_TRANSCRIPTION_FACTOR_ACTIVITY | 1.15 | 0.64 | 0 | 0 | 0 | not significant |
| 9962  | GOTZMANN_EPITHELIAL_TO_MESENCHYMAL_TRANSITION_DN                  | 1.15 | 0.64 | 0 | 0 | 0 | not significant |
| 9963  | GO_REGULATION_OF_EPITHELIAL_CELL_DIFFERENTIATION                  | 1.15 | 0.63 | 0 | 0 | 0 | not significant |
| 9964  | KEGG_TOLL_LIKE_RECEPTOR_SIGNALING_PATHWAY                         | 1.15 | 0.63 | 0 | 0 | 0 | not significant |
| 9965  | TARTE_PLASMA_CELL_VS_B_LYMPHOCYTE_UP                              | 1.15 | 0.63 | 0 | 0 | 0 | not significant |
| 9966  | GO_PROTEOGLYCAN_METABOLIC_PROCESS                                 | 1.15 | 0.62 | 0 | 0 | 0 | not significant |
| 9967  | REACTOME_TOLL_LIKE_RECEPTOR_CASCADES                              | 1.15 | 0.62 | 0 | 0 | 0 | not significant |
| 9968  | KEEN_RESPONSE_TO_ROSIGLITAZONE_DN                                 | 1.15 | 0.61 | 0 | 0 | 0 | not significant |
| 9969  | BIOCARTA_DEATH_PATHWAY                                            | 1.15 | 0.6  | 0 | 0 | 0 | not significant |
| 9970  | CUI_GLUCOSE_DEPRIVATION                                           | 1.15 | 0.6  | 0 | 0 | 0 | not significant |
| 9971  | GO_NEUROMUSCULAR_JUNCTION                                         | 1.15 | 0.6  | 0 | 0 | 0 | not significant |
| 9972  | GO_PROTEIN_EXIT_FROM_ENDOPLASMIC_RETICULUM                        | 1.15 | 0.6  | 0 | 0 | 0 | not significant |
| 9973  | GO_THIOESTER_METABOLIC_PROCESS                                    | 1.15 | 0.6  | 0 | 0 | 0 | not significant |
| 9974  | KLEIN_PRIMARY_EFFUSION_LYMPHOMA_DN                                | 1.15 | 0.6  | 0 | 0 | 0 | not significant |
| 9975  | MAHAJAN_RESPONSE_TO_IL1A_DN                                       | 1.15 | 0.6  | 0 | 0 | 0 | not significant |
| 9976  | MARIADASON_REGULATED_BY_HISTONE_ACETYLATION_UP                    | 1.15 | 0.6  | 0 | 0 | 0 | not significant |
| 9977  | REACTOME_TRANSCRIPTIONAL_REGULATION_BY_E2F6                       | 1.15 | 0.6  | 0 | 0 | 0 | not significant |
| 9978  | GO_REGULATION_OF_CD4_POSITIVE_ALPHA_BETA_T_CELL_ACTIVATION        | 1.15 | 0.59 | 0 | 0 | 0 | not significant |
| 9979  | GO_REGULATION_OF_DOUBLE_STRAND_BREAK_REPAIR                       | 1.15 | 0.59 | 0 | 0 | 0 | not significant |
| 9980  | GO_REGULATION_OF_MACROPHAGE_MIGRATION                             | 1.15 | 0.59 | 0 | 0 | 0 | not significant |
| 9981  | APPIERTO_RESPONSE_TO_FENRETINIDE_DN                               | 1.15 | 0.58 | 0 | 0 | 0 | not significant |
| 9982  | GO_MEMBRANE_PROTEIN_PROTEOLYSIS                                   | 1.15 | 0.58 | 0 | 0 | 0 | not significant |
| 9983  | KEGG_BASAL_CELL_CARCINOMA                                         | 1.15 | 0.58 | 0 | 0 | 0 | not significant |
| 9984  | ANDERSEN_LIVER_CANCER_KRT19_DN                                    | 1.15 | 0.57 | 0 | 0 | 0 | not significant |
| 9985  | CHR11Q24                                                          | 1.15 | 0.57 | 0 | 0 | 0 | not significant |
| 9986  | GO_INTERMEDIATE_FILAMENT_BASED_PROCESS                            | 1.15 | 0.57 | 0 | 0 | 0 | not significant |
| 9987  | HOSHIDA_LIVER_CANCER_LATE_RECURRENCE_UP                           | 1.15 | 0.57 | 0 | 0 | 0 | not significant |
| 9988  | HOLLEMAN_VINCISTINE_RESISTANCE_ALL_UP                             | 1.15 | 0.56 | 0 | 0 | 0 | not significant |
| 9989  | LEE_LIVER_CANCER_MYC_E2F1_DN                                      | 1.15 | 0.56 | 0 | 0 | 0 | not significant |
| 9990  | GO_CALCIIUM_DEPENDENT_PHOSPHOLIPID_BINDING                        | 1.15 | 0.55 | 0 | 0 | 0 | not significant |
| 9991  | GO_LAMININ_BINDING                                                | 1.15 | 0.55 | 0 | 0 | 0 | not significant |
| 9992  | GO_PHOTORECEPTOR_CELL_DIFFERENTIATION                             | 1.15 | 0.55 | 0 | 0 | 0 | not significant |
| 9993  | GO_REGULATION_OF_POLYSACCHARIDE_METABOLIC_PROCESS                 | 1.15 | 0.55 | 0 | 0 | 0 | not significant |
| 9994  | GO_REGULATION_OF_SYSTEMIC_ARTERIAL_BLOOD_PRESSURE_MEDIATED_BY_A   | 1.15 | 0.55 | 0 | 0 | 0 | not significant |
| 9995  | PID_BMP_PATHWAY                                                   | 1.15 | 0.55 | 0 | 0 | 0 | not significant |
| 9996  | PID_ERBB4_PATHWAY                                                 | 1.15 | 0.55 | 0 | 0 | 0 | not significant |
| 9997  | BIOCARTA_IGF1_PATHWAY                                             | 1.15 | 0.54 | 0 | 0 | 0 | not significant |
| 9998  | GO_DENDRITIC_CELL_MIGRATION                                       | 1.15 | 0.54 | 0 | 0 | 0 | not significant |
| 9999  | GO_NEGATIVE_REGULATION_OF_MUSCLE_TISSUE_DEVELOPMENT               | 1.15 | 0.54 | 0 | 0 | 0 | not significant |
| 10000 | GO_POSITIVE_REGULATION_OF_PHOSPHOLIPASE_ACTIVITY                  | 1.15 | 0.54 | 0 | 0 | 0 | not significant |
| 10001 | GO_PALMITOYLTRANSFERASE_ACTIVITY                                  | 1.15 | 0.53 | 0 | 0 | 0 | not significant |
| 10002 | GO_POSITIVE_REGULATION_OF_CHROMATIN_BINDING                       | 1.15 | 0.53 | 0 | 0 | 0 | not significant |
| 10003 | BIOCARTA_CDK5_PATHWAY                                             | 1.15 | 0.52 | 0 | 0 | 0 | not significant |
| 10004 | GO_NEGATIVE_REGULATION_OF_INTERLEUKIN_6_SECRETION                 | 1.15 | 0.52 | 0 | 0 | 0 | not significant |
| 10005 | GO_REGULATION_OF_NATURAL_KILLER_CELL_DIFFERENTIATION              | 1.15 | 0.52 | 0 | 0 | 0 | not significant |
| 10006 | LEIN_ASTROCYTE_MARKERS                                            | 1.15 | 0.52 | 0 | 0 | 0 | not significant |
| 10007 | SA_MMP_CYTOKINE_CONNECTION                                        | 1.15 | 0.52 | 0 | 0 | 0 | not significant |
| 10008 | GO_PROXIMAL_DISTAL_PATTERN_FORMATION                              | 1.15 | 0.5  | 0 | 0 | 0 | not significant |
| 10009 | REACTOME_VLDLR_INTERNALISATION_AND_DEGRADATION                    | 1.15 | 0.5  | 0 | 0 | 0 | not significant |
| 10010 | BIOCARTA_IFNG_PATHWAY                                             | 1.15 | 0.49 | 0 | 0 | 0 | not significant |
| 10011 | GO_REGULATION_OF_CELL_PROLIFERATION_INVOLVED_IN_KIDNEY_DEVELOPMEN | 1.15 | 0.49 | 0 | 0 | 0 | not significant |
| 10012 | GO_ERYTHROCYTE_MATURATION                                         | 1.15 | 0.48 | 0 | 0 | 0 | not significant |
| 10013 | GO_MITOCHONDRIAL_ALPHA_KETOGLUTARATE_DEHYDROGENASE_COMPLEX        | 1.15 | 0.48 | 0 | 0 | 0 | not significant |
| 10014 | GO_POSITIVE_REGULATION_OF_DNA_LIGATION                            | 1.15 | 0.48 | 0 | 0 | 0 | not significant |
| 10015 | GO_POSITIVE_REGULATION_OF_T_HELPER_17_TYPE_IMMUNE_RESPONSE        | 1.15 | 0.48 | 0 | 0 | 0 | not significant |
| 10016 | GO_T_CELL_RECEPTOR_BINDING                                        | 1.15 | 0.48 | 0 | 0 | 0 | not significant |



|       |                                                                   |      |      |   |   |   |                 |
|-------|-------------------------------------------------------------------|------|------|---|---|---|-----------------|
| 10017 | SAENZ_DETOX_PATHWAY_AND_CARCIINOGENESIS_DN                        | 1.15 | 0.48 | 0 | 0 | 0 | not significant |
| 10018 | CHR3Q11                                                           | 1.15 | 0.47 | 0 | 0 | 0 | not significant |
| 10019 | GO_BUBBLE_DNA_BINDING                                             | 1.15 | 0.47 | 0 | 0 | 0 | not significant |
| 10020 | GO_CHEMOKINE_SECRETION                                            | 1.15 | 0.47 | 0 | 0 | 0 | not significant |
| 10021 | GO_HYDROLASE_ACTIVITY_ACTING_ON_ETHER_BONDS                       | 1.15 | 0.47 | 0 | 0 | 0 | not significant |
| 10022 | GO_MITOCHONDRIAL_TRICARBOXYLIC_ACID_CYCLE_ENZYME_COMPLEX          | 1.15 | 0.47 | 0 | 0 | 0 | not significant |
| 10023 | GO_SECRETION_OF_LYSOSOMAL_ENZYMES                                 | 1.15 | 0.47 | 0 | 0 | 0 | not significant |
| 10024 | JOHANSSON_BRAIN_CANCER_EARLY_VS_LATE_UP                           | 1.15 | 0.47 | 0 | 0 | 0 | not significant |
| 10025 | REACTOME_PHASE_4_RESTING_MEMBRANE_POTENTIAL                       | 1.15 | 0.47 | 0 | 0 | 0 | not significant |
| 10026 | GO_CELL_CELL_JUNCTION_MAINTENANCE                                 | 1.15 | 0.46 | 0 | 0 | 0 | not significant |
| 10027 | GO_MACROMOLECULE_DEPALMITOYLATION                                 | 1.15 | 0.46 | 0 | 0 | 0 | not significant |
| 10028 | GO_RESPONSE_TO_SORBITOL                                           | 1.15 | 0.46 | 0 | 0 | 0 | not significant |
| 10029 | GO_PROTEIN_POLYUFGMYLATION                                        | 1.15 | 0.45 | 0 | 0 | 0 | not significant |
| 10030 | SMID_BREAST_CANCER_RELAPSE_IN_LUNG_DN                             | 1.15 | 0.45 | 0 | 0 | 0 | not significant |
| 10031 | GO_SPECTRIN_ASSOCIATED_CYTOSKELETON                               | 1.15 | 0.44 | 0 | 0 | 0 | not significant |
| 10032 | MARSON_BOUND_BY_FOXP3_UNSTIMULATED                                | 1.16 | 1.17 | 0 | 0 | 0 | not significant |
| 10033 | GO_SIGNALING_RECEPTOR_BINDING                                     | 1.16 | 1.15 | 0 | 0 | 0 | not significant |
| 10034 | GO_REGULATION_OF_IMMUNE_SYSTEM_PROCESS                            | 1.16 | 1.13 | 0 | 0 | 0 | not significant |
| 10035 | BUYTAERT_PHOTODYNAMIC_THERAPY_STRESS_UP                           | 1.16 | 1.08 | 0 | 0 | 0 | not significant |
| 10036 | GO_CIRCULATORY_SYSTEM_DEVELOPMENT                                 | 1.16 | 1.07 | 0 | 0 | 0 | not significant |
| 10037 | GO_REGULATION_OF_PROTEIN_LOCALIZATION                             | 1.16 | 1.02 | 0 | 0 | 0 | not significant |
| 10038 | LIAO_METASTASIS                                                   | 1.16 | 0.95 | 0 | 0 | 0 | not significant |
| 10039 | GO_OXIDOREDUCTASE_ACTIVITY                                        | 1.16 | 0.91 | 0 | 0 | 0 | not significant |
| 10040 | ONKEN_UVEAL_MELANOMA_DN                                           | 1.16 | 0.88 | 0 | 0 | 0 | not significant |
| 10041 | GO_POSITIVE_REGULATION_OF_LOCOMOTION                              | 1.16 | 0.84 | 0 | 0 | 0 | not significant |
| 10042 | GO_CELLULAR_RESPONSE_TO_OXIDATIVE_STRESS                          | 1.16 | 0.83 | 0 | 0 | 0 | not significant |
| 10043 | DELYS_THYROID_CANCER_UP                                           | 1.16 | 0.82 | 0 | 0 | 0 | not significant |
| 10044 | GO_REGULATION_OF_SMALL_GTPASE_MEDIATED_SIGNAL_TRANSDUCTION        | 1.16 | 0.82 | 0 | 0 | 0 | not significant |
| 10045 | GO_REGULATION_OF_ION_TRANSMEMBRANE_TRANSPORT                      | 1.16 | 0.81 | 0 | 0 | 0 | not significant |
| 10046 | GO_CELLULAR_RESPONSE_TO_EXTERNAL_STIMULUS                         | 1.16 | 0.8  | 0 | 0 | 0 | not significant |
| 10047 | GO_REGULATION_OF_STRESS_ACTIVATED_PROTEIN_KINASE_SIGNALING_CASCAD | 1.16 | 0.76 | 0 | 0 | 0 | not significant |
| 10048 | LEE_RECENT_THYMIC_EMIGRANT                                        | 1.16 | 0.76 | 0 | 0 | 0 | not significant |
| 10049 | GO_CARBOHYDRATE_HOMEOSTASIS                                       | 1.16 | 0.73 | 0 | 0 | 0 | not significant |
| 10050 | GO_SULFUR_COMPOUND_METABOLIC_PROCESS                              | 1.16 | 0.72 | 0 | 0 | 0 | not significant |
| 10051 | DER_IFN_GAMMA_RESPONSE_UP                                         | 1.16 | 0.66 | 0 | 0 | 0 | not significant |
| 10052 | GO_REGULATION_OF_DNA_RECOMBINATION                                | 1.16 | 0.66 | 0 | 0 | 0 | not significant |
| 10053 | GO_PLASMA_MEMBRANE_RAFT                                           | 1.16 | 0.65 | 0 | 0 | 0 | not significant |
| 10054 | MIKKELSEN_MEF_HCP_WITH_H3_UNMETHYLATED                            | 1.16 | 0.65 | 0 | 0 | 0 | not significant |
| 10055 | SWEET_KRAS_ONCOGENIC_SIGNATURE                                    | 1.16 | 0.65 | 0 | 0 | 0 | not significant |
| 10056 | GO_CLUSTER_OF_ACTIN_BASED_CELL_PROJECTIONS                        | 1.16 | 0.64 | 0 | 0 | 0 | not significant |
| 10057 | GO_POSITIVE_REGULATION_OF_MYELOID_CELL_DIFFERENTIATION            | 1.16 | 0.64 | 0 | 0 | 0 | not significant |
| 10058 | GO_REGULATION_OF_CATION_CHANNEL_ACTIVITY                          | 1.16 | 0.64 | 0 | 0 | 0 | not significant |
| 10059 | GO_XENOBIOTIC_METABOLIC_PROCESS                                   | 1.16 | 0.64 | 0 | 0 | 0 | not significant |
| 10060 | HUANG_DASATINIB_RESISTANCE_UP                                     | 1.16 | 0.63 | 0 | 0 | 0 | not significant |
| 10061 | PTEN_DNV2_UP                                                      | 1.16 | 0.63 | 0 | 0 | 0 | not significant |
| 10062 | CHR1Q22                                                           | 1.16 | 0.62 | 0 | 0 | 0 | not significant |
| 10063 | GO_CELLULAR_RESPONSE_TO_IONIZING_RADIATION                        | 1.16 | 0.62 | 0 | 0 | 0 | not significant |
| 10064 | HALLMARK_ANDROGEN_RESPONSE                                        | 1.16 | 0.62 | 0 | 0 | 0 | not significant |
| 10065 | NIKOLSKY_BREAST_CANCER_7Q21_Q22_AMPLICON                          | 1.16 | 0.62 | 0 | 0 | 0 | not significant |
| 10066 | PID_TNF_PATHWAY                                                   | 1.16 | 0.62 | 0 | 0 | 0 | not significant |
| 10067 | GO_MEMBRANE_INVAGINATION                                          | 1.16 | 0.61 | 0 | 0 | 0 | not significant |
| 10068 | GO_SYNAPTIC_VESICLE_MEMBRANE                                      | 1.16 | 0.6  | 0 | 0 | 0 | not significant |
| 10069 | SESTO_RESPONSE_TO_UV_C6                                           | 1.16 | 0.6  | 0 | 0 | 0 | not significant |
| 10070 | VILLANUEVA_LIVER_CANCER_KRT19_DN                                  | 1.16 | 0.6  | 0 | 0 | 0 | not significant |
| 10071 | WANG_TARGETS_OF_MLL_CBP_FUSION_UP                                 | 1.16 | 0.6  | 0 | 0 | 0 | not significant |
| 10072 | GO_METANEPHROS_DEVELOPMENT                                        | 1.16 | 0.59 | 0 | 0 | 0 | not significant |
| 10073 | REACTOME_CLASS_B_2_SECRETIN_FAMILY_RECEPTORS                      | 1.16 | 0.59 | 0 | 0 | 0 | not significant |
| 10074 | CHR7P14                                                           | 1.16 | 0.58 | 0 | 0 | 0 | not significant |
| 10075 | GALLUZZI_PERMEABILIZE_MITOCHONDRIA                                | 1.16 | 0.58 | 0 | 0 | 0 | not significant |
| 10076 | GO_POSITIVE_REGULATION_OF_DNA_REPLICATION                         | 1.16 | 0.58 | 0 | 0 | 0 | not significant |
| 10077 | KUUSELO_PANCREATIC_CANCER_19Q13_AMPLIFICATION                     | 1.16 | 0.58 | 0 | 0 | 0 | not significant |
| 10078 | GO_AMYLOID_BETA_FORMATION                                         | 1.16 | 0.57 | 0 | 0 | 0 | not significant |
| 10079 | GO_PROTEIN_MANNOSYLATION                                          | 1.16 | 0.57 | 0 | 0 | 0 | not significant |
| 10080 | SHIN_B_CELL_LYMPHOMA_CLUSTER_3                                    | 1.16 | 0.57 | 0 | 0 | 0 | not significant |
| 10081 | ZWANG_EGF_PERSISTENTLY_UP                                         | 1.16 | 0.57 | 0 | 0 | 0 | not significant |
| 10082 | BRACHAT_RESPONSE_TO_CAMPTOTHECIN_UP                               | 1.16 | 0.56 | 0 | 0 | 0 | not significant |
| 10083 | MODY_HIPPOCAMPUS_NEONATAL                                         | 1.16 | 0.56 | 0 | 0 | 0 | not significant |
| 10084 | TRAYNOR_RETT_SYNDROM_UP                                           | 1.16 | 0.56 | 0 | 0 | 0 | not significant |
| 10085 | COLLIS_PRKDC_SUBSTRATES                                           | 1.16 | 0.55 | 0 | 0 | 0 | not significant |
| 10086 | GO_POSITIVE_REGULATION_OF_COLLAGEN_BIOSYNTHETIC_PROCESS           | 1.16 | 0.55 | 0 | 0 | 0 | not significant |
| 10087 | GO_RACEMASE_AND_EPIMERASE_ACTIVITY                                | 1.16 | 0.55 | 0 | 0 | 0 | not significant |
| 10088 | GO_POSITIVE_REGULATION_OF_CARTILAGE_DEVELOPMENT                   | 1.16 | 0.54 | 0 | 0 | 0 | not significant |
| 10089 | BOYALT_LIVER_CANCER_SUBCLASS_G6_DN                                | 1.16 | 0.53 | 0 | 0 | 0 | not significant |
| 10090 | GO_MCM_COMPLEX                                                    | 1.16 | 0.53 | 0 | 0 | 0 | not significant |
| 10091 | GO_REGULATION_OF_PROTEIN_HOMOOLIGOMERIZATION                      | 1.16 | 0.53 | 0 | 0 | 0 | not significant |
| 10092 | MYLLYKANGAS_AMPLIFICATION_HOT_SPOT_23                             | 1.16 | 0.53 | 0 | 0 | 0 | not significant |
| 10093 | GO_PERINUCLEAR_ENDOPLASMIC_RETICULUM                              | 1.16 | 0.52 | 0 | 0 | 0 | not significant |
| 10094 | GO_POSITIVE_REGULATION_OF_HISTONE_DEACETYLATION                   | 1.16 | 0.52 | 0 | 0 | 0 | not significant |
| 10095 | REACTOME_NUCLEBASE_CATABOLISM                                     | 1.16 | 0.52 | 0 | 0 | 0 | not significant |
| 10096 | REACTOME_PROLACTIN_RECEPTOR_SIGNALING                             | 1.16 | 0.52 | 0 | 0 | 0 | not significant |
| 10097 | BIOCARTA_PDZS_PATHWAY                                             | 1.16 | 0.51 | 0 | 0 | 0 | not significant |
| 10098 | FLORIO_HUMAN_NEOCORTEX                                            | 1.16 | 0.51 | 0 | 0 | 0 | not significant |
| 10099 | GO_SPECTRIN                                                       | 1.16 | 0.51 | 0 | 0 | 0 | not significant |
| 10100 | GO_3_5_CYCLIC_AMP_PHOSPHODIESTERASE_ACTIVITY                      | 1.16 | 0.5  | 0 | 0 | 0 | not significant |
| 10101 | GO_NEGATIVE_REGULATION_OF_CILIUM_ASSEMBLY                         | 1.16 | 0.5  | 0 | 0 | 0 | not significant |
| 10102 | MIKKELSEN_IPS_HCP_WITH_H3_UNMETHYLATED                            | 1.16 | 0.5  | 0 | 0 | 0 | not significant |
| 10103 | REACTOME_TERMINATION_OF_O_GLYCAN_BIOSYNTHESIS                     | 1.16 | 0.5  | 0 | 0 | 0 | not significant |
| 10104 | BIOCARTA_TORA_PATHWAY                                             | 1.16 | 0.49 | 0 | 0 | 0 | not significant |
| 10105 | GO_MICROTUBULE_NUCLEATION_BY_MICROTUBULE_ORGANIZING_CENTER        | 1.16 | 0.49 | 0 | 0 | 0 | not significant |
| 10106 | GO_REGULATION_OF_PLATELET_DERIVED_GROWTH_FACTOR_RECEPTOR_BETA     | 1.16 | 0.49 | 0 | 0 | 0 | not significant |
| 10107 | GO_LEPTIN_MEDIATED_SIGNALING_PATHWAY                              | 1.16 | 0.48 | 0 | 0 | 0 | not significant |
| 10108 | GO_POSITIVE_REGULATION_OF_SYNAPTIC_VESICLE_TRANSPORT              | 1.16 | 0.48 | 0 | 0 | 0 | not significant |
| 10109 | GO_CO_SMAD_BINDING                                                | 1.16 | 0.47 | 0 | 0 | 0 | not significant |
| 10110 | GO_RAGULATOR_COMPLEX                                              | 1.16 | 0.47 | 0 | 0 | 0 | not significant |
| 10111 | GO_REPLICATION_FORK_ARREST                                        | 1.16 | 0.47 | 0 | 0 | 0 | not significant |
| 10112 | LEE_SP4_THYMOCYTE                                                 | 1.16 | 0.47 | 0 | 0 | 0 | not significant |
| 10113 | GO_REGULATION_OF_TRANSPORT                                        | 1.17 | 1.4  | 0 | 0 | 0 | not significant |
| 10114 | GO_POSITIVE_REGULATION_OF_MULTICELLULAR_ORGANISMAL_PROCESS        | 1.17 | 1.23 | 0 | 0 | 0 | not significant |
| 10115 | GO_CHEMICAL_HOMEOSTASIS                                           | 1.17 | 1.18 | 0 | 0 | 0 | not significant |
| 10116 | CUI_TCF21_TARGETS_2_DN                                            | 1.17 | 1.02 | 0 | 0 | 0 | not significant |
| 10117 | GO_INNATE_IMMUNE_RESPONSE                                         | 1.17 | 1.02 | 0 | 0 | 0 | not significant |
| 10118 | GO_MULTI_ORGANISM_REPRODUCTIVE_PROCESS                            | 1.17 | 0.99 | 0 | 0 | 0 | not significant |
| 10119 | DELACROIX_RARG_BOUND_MEF                                          | 1.17 | 0.89 | 0 | 0 | 0 | not significant |
| 10120 | GO_EARLY_ENDOSOME                                                 | 1.17 | 0.87 | 0 | 0 | 0 | not significant |
| 10121 | GO_INTRINSIC_APOPTOTIC_SIGNALING_PATHWAY                          | 1.17 | 0.87 | 0 | 0 | 0 | not significant |
| 10122 | GO_RESPONSE_TO_INSULIN                                            | 1.17 | 0.83 | 0 | 0 | 0 | not significant |
| 10123 | CAIRO_HEPATOBLASTOMA_UP                                           | 1.17 | 0.77 | 0 | 0 | 0 | not significant |
| 10124 | GO_RESPONSE_TO_STARVATION                                         | 1.17 | 0.77 | 0 | 0 | 0 | not significant |
| 10125 | GO_STEROID_HORMONE_MEDIATED_SIGNALING_PATHWAY                     | 1.17 | 0.77 | 0 | 0 | 0 | not significant |

|       |                                                                    |      |      |   |   |   |                 |
|-------|--------------------------------------------------------------------|------|------|---|---|---|-----------------|
| 10126 | GO_RESPONSE_TO_REACTIVE_OXYGEN_SPECIES                             | 1.17 | 0.75 | 0 | 0 | 0 | not significant |
| 10127 | HALLMARK_ESTROGEN_RESPONSE_EARLY                                   | 1.17 | 0.75 | 0 | 0 | 0 | not significant |
| 10128 | GO_RESPONSE_TO_UV                                                  | 1.17 | 0.74 | 0 | 0 | 0 | not significant |
| 10129 | GO_CELLULAR_RESPONSE_TO_REACTIVE_OXYGEN_SPECIES                    | 1.17 | 0.72 | 0 | 0 | 0 | not significant |
| 10130 | P53_DN.V1_UP                                                       | 1.17 | 0.72 | 0 | 0 | 0 | not significant |
| 10131 | REACTOME_ION_CHANNEL_TRANSPORT                                     | 1.17 | 0.72 | 0 | 0 | 0 | not significant |
| 10132 | RICKMAN_TUMOR_DIFFERENTIATED_MODERATELY_VS_POORLY_UP               | 1.17 | 0.72 | 0 | 0 | 0 | not significant |
| 10133 | GO_DETECTION_OF_STIMULUS                                           | 1.17 | 0.7  | 0 | 0 | 0 | not significant |
| 10134 | ESC_V6.5_UP_LATE.V1_UP                                             | 1.17 | 0.69 | 0 | 0 | 0 | not significant |
| 10135 | GO_AZUROPHIL_GNANULE_LUMEN                                         | 1.17 | 0.69 | 0 | 0 | 0 | not significant |
| 10136 | GO_MONOCARBOXYLIC_ACID_CATABOLIC_PROCESS                           | 1.17 | 0.69 | 0 | 0 | 0 | not significant |
| 10137 | IL21_UP.V1_UP                                                      | 1.17 | 0.68 | 0 | 0 | 0 | not significant |
| 10138 | KAN_RESPONSE_TO_ARSENIC_TRIOXIDE                                   | 1.17 | 0.68 | 0 | 0 | 0 | not significant |
| 10139 | EBAUER_TARGETS_OF_PAX3_FOXO1_FUSION_UP                             | 1.17 | 0.67 | 0 | 0 | 0 | not significant |
| 10140 | GO_SPERMATID_DIFFERENTIATION                                       | 1.17 | 0.66 | 0 | 0 | 0 | not significant |
| 10141 | KEGG_LEUKOCYTE_TRANSENDOTHELIAL_MIGRATION                          | 1.17 | 0.66 | 0 | 0 | 0 | not significant |
| 10142 | MARKEY_RB1_CHRONIC_LOF_DN                                          | 1.17 | 0.66 | 0 | 0 | 0 | not significant |
| 10143 | MORI_PLASMA_CELL_UP                                                | 1.17 | 0.65 | 0 | 0 | 0 | not significant |
| 10144 | GO_DIGESTION                                                       | 1.17 | 0.64 | 0 | 0 | 0 | not significant |
| 10145 | GO_REGULATION_OF_ERAD_PATHWAY                                      | 1.17 | 0.64 | 0 | 0 | 0 | not significant |
| 10146 | LEE_TARGETS_OF_PTCH1_AND_SUFU_DN                                   | 1.17 | 0.64 | 0 | 0 | 0 | not significant |
| 10147 | LIM_MAMMARY_LUMINAL_MATURE_DN                                      | 1.17 | 0.64 | 0 | 0 | 0 | not significant |
| 10148 | GO_ENDOPLASMIC_RETICULUM_GOLGI_INTERMEDIATE_COMPARTMENT_MEMBRAN    | 1.17 | 0.62 | 0 | 0 | 0 | not significant |
| 10149 | GO_TUMOR_NECROSIS_FACTOR_RECEPTOR_BINDING                          | 1.17 | 0.62 | 0 | 0 | 0 | not significant |
| 10150 | ZWANG_EGF_INTERVAL_UP                                              | 1.17 | 0.62 | 0 | 0 | 0 | not significant |
| 10151 | BOYLAN_MULTIPLE_MYELOMA_D_CLUSTER_DN                               | 1.17 | 0.61 | 0 | 0 | 0 | not significant |
| 10152 | GO_GLIAL_CELL_MIGRATION                                            | 1.17 | 0.61 | 0 | 0 | 0 | not significant |
| 10153 | HADDAD_T_LYMPHOCYTE_AND_NK_PROGENITOR_UP                           | 1.17 | 0.61 | 0 | 0 | 0 | not significant |
| 10154 | REACTOME_NON_INTEGRIN_MEMBRANE_ECM_INTERACTIONS                    | 1.17 | 0.61 | 0 | 0 | 0 | not significant |
| 10155 | SCHAEFFER_SOX9_TARGETS_IN_PROSTATE_DEVELOPMENT_DN                  | 1.17 | 0.61 | 0 | 0 | 0 | not significant |
| 10156 | GO_POSITIVE_REGULATION_OF_BIOMINERAL_TISSUE_DEVELOPMENT            | 1.17 | 0.6  | 0 | 0 | 0 | not significant |
| 10157 | GO_RESPONSE_TO_INTERLEUKIN_4                                       | 1.17 | 0.6  | 0 | 0 | 0 | not significant |
| 10158 | HU_GENOTOXIN_ACTION_DIRECT_VS_INDIRECT_4HR                         | 1.17 | 0.6  | 0 | 0 | 0 | not significant |
| 10159 | KEGG_GLYCOSAMINOGLYCAN_BIOSYNTHESIS_HEPARAN_SULFATE                | 1.17 | 0.6  | 0 | 0 | 0 | not significant |
| 10160 | REACTOME_PEPTIDE_LIGAND_BINDING_RECEPTORS                          | 1.17 | 0.6  | 0 | 0 | 0 | not significant |
| 10161 | GO_ACTIVATED_T_CELL_PROLIFERATION                                  | 1.17 | 0.59 | 0 | 0 | 0 | not significant |
| 10162 | GO_NEGATIVE_REGULATION_OF_RESPONSE_TO_CYTOKINE_STIMULUS            | 1.17 | 0.59 | 0 | 0 | 0 | not significant |
| 10163 | GO_RNA_POLYMERASE_II_ACTIVATING_TRANSCRIPTION_FACTOR_BINDING       | 1.17 | 0.59 | 0 | 0 | 0 | not significant |
| 10164 | REACTOME_ER_QUALITY_CONTROL_COMPARTMENT_ERQC                       | 1.17 | 0.59 | 0 | 0 | 0 | not significant |
| 10165 | OUYANG_PROSTATE_CANCER_MARKERS                                     | 1.17 | 0.58 | 0 | 0 | 0 | not significant |
| 10166 | REACTOME_SYNTHESIS_OF_GLYCOSYLPHOSPHATIDYLINOSITOL_GPI             | 1.17 | 0.58 | 0 | 0 | 0 | not significant |
| 10167 | BIOCARTA_GATA3_PATHWAY                                             | 1.17 | 0.57 | 0 | 0 | 0 | not significant |
| 10168 | GO_PEPTIDE_CATABOLIC_PROCESS                                       | 1.17 | 0.57 | 0 | 0 | 0 | not significant |
| 10169 | PID_RHOA_REG_PATHWAY                                               | 1.17 | 0.57 | 0 | 0 | 0 | not significant |
| 10170 | GO_RESPONSE_TO_GLUCAGON                                            | 1.17 | 0.56 | 0 | 0 | 0 | not significant |
| 10171 | GO_SPECTRIN_BINDING                                                | 1.17 | 0.56 | 0 | 0 | 0 | not significant |
| 10172 | REACTOME_INSULIN_RECEPTOR_RECYCLING                                | 1.17 | 0.56 | 0 | 0 | 0 | not significant |
| 10173 | VISALA_AGING_LYMPHOCYTE_DN                                         | 1.17 | 0.56 | 0 | 0 | 0 | not significant |
| 10174 | GO_REGULATION_OF_CELL_CELL_ADHESION_MEDIATED_BY_INTEGRIN           | 1.17 | 0.55 | 0 | 0 | 0 | not significant |
| 10175 | GO_C_ACYLTRANSFERASE_ACTIVITY                                      | 1.17 | 0.54 | 0 | 0 | 0 | not significant |
| 10176 | GO_ECTODERM_DEVELOPMENT                                            | 1.17 | 0.54 | 0 | 0 | 0 | not significant |
| 10177 | REACTOME_METABOLISM_OF_STEROID_HORMONES                            | 1.17 | 0.54 | 0 | 0 | 0 | not significant |
| 10178 | REACTOME_MUCOPOLYSACCHARIDOSES                                     | 1.17 | 0.54 | 0 | 0 | 0 | not significant |
| 10179 | GO_CELL_BODY_MEMBRANE                                              | 1.17 | 0.53 | 0 | 0 | 0 | not significant |
| 10180 | GO_MAINTENANCE_OF_PROTEIN_LOCALIZATION_IN_ENDOPLASMIC_RETICULUM    | 1.17 | 0.53 | 0 | 0 | 0 | not significant |
| 10181 | GO_PALMITOYL_PROTEIN_HYDROLASE_ACTIVITY                            | 1.17 | 0.53 | 0 | 0 | 0 | not significant |
| 10182 | GO_PHOSPHATIDYLINOSITOL_4_5_BISPHOSPHATE_PHOSPHATASE_ACTIVITY      | 1.17 | 0.53 | 0 | 0 | 0 | not significant |
| 10183 | GO_POSITIVE_REGULATION_OF_ENDOTHELIAL_CELL_DIFFERENTIATION         | 1.17 | 0.53 | 0 | 0 | 0 | not significant |
| 10184 | GO_VIRAL_BUDDING_VIA_HOST_ESCRT_COMPLEX                            | 1.17 | 0.53 | 0 | 0 | 0 | not significant |
| 10185 | GO_GASTRIC_ACID_SECRETION                                          | 1.17 | 0.52 | 0 | 0 | 0 | not significant |
| 10186 | GO_SECRETION_BY_TISSUE                                             | 1.17 | 0.52 | 0 | 0 | 0 | not significant |
| 10187 | GO_TETRAHYDROFOLATE_INTERCONVERSION                                | 1.17 | 0.52 | 0 | 0 | 0 | not significant |
| 10188 | GO_VENTRICULAR_CARDIAC_MUSCLE_CELL_ACTION_POTENTIAL                | 1.17 | 0.52 | 0 | 0 | 0 | not significant |
| 10189 | REACTOME_POLB_DEPENDENT_LONG_PATCH_BASE_EXCISION_REPAIR            | 1.17 | 0.52 | 0 | 0 | 0 | not significant |
| 10190 | GO_CARDIAC_MUSCLE_FIBER_DEVELOPMENT                                | 1.17 | 0.51 | 0 | 0 | 0 | not significant |
| 10191 | GO_DELAYED_RECTIFIER_POTASSIUM_CHANNEL_ACTIVITY                    | 1.17 | 0.51 | 0 | 0 | 0 | not significant |
| 10192 | GO_GALACTOSIDASE_ACTIVITY                                          | 1.17 | 0.51 | 0 | 0 | 0 | not significant |
| 10193 | GO_POSITIVE_REGULATION_OF_T_HELPER_17_CELL_DIFFERENTIATION         | 1.17 | 0.51 | 0 | 0 | 0 | not significant |
| 10194 | BIOCARTA_RECK_PATHWAY                                              | 1.17 | 0.5  | 0 | 0 | 0 | not significant |
| 10195 | GO_GLYCINE_TRANSPORT                                               | 1.17 | 0.5  | 0 | 0 | 0 | not significant |
| 10196 | GO_ZYMOGEN_INHIBITION                                              | 1.17 | 0.5  | 0 | 0 | 0 | not significant |
| 10197 | GO_PYROPTOSIS                                                      | 1.17 | 0.49 | 0 | 0 | 0 | not significant |
| 10198 | GO_NEGATIVE_REGULATION_OF_PERK_MEDIATED_UNFOLDED_PROTEIN_RESPON    | 1.17 | 0.48 | 0 | 0 | 0 | not significant |
| 10199 | GO_SPHINGOSINE_1_PHOSPHATE_RECEPTOR_ACTIVITY                       | 1.17 | 0.48 | 0 | 0 | 0 | not significant |
| 10200 | GO_RESPONSE_TO_ENDOGENOUS_STIMULUS                                 | 1.18 | 1.38 | 0 | 0 | 0 | not significant |
| 10201 | PEREZ_TP53_TARGETS                                                 | 1.18 | 1.2  | 0 | 0 | 0 | not significant |
| 10202 | REACTOME_TRANSPORT_OF_SMALL_MOLECULES                              | 1.18 | 1.02 | 0 | 0 | 0 | not significant |
| 10203 | GO_NERVOUS_SYSTEM_PROCESS                                          | 1.18 | 0.96 | 0 | 0 | 0 | not significant |
| 10204 | GO_REGULATION_OF_CELL_ADHESION                                     | 1.18 | 0.96 | 0 | 0 | 0 | not significant |
| 10205 | RICKMAN_TUMOR_DIFFERENTIATED_WELL_VS_POORLY_UP                     | 1.18 | 0.88 | 0 | 0 | 0 | not significant |
| 10206 | GO_PHOSPHOLIPID_METABOLIC_PROCESS                                  | 1.18 | 0.86 | 0 | 0 | 0 | not significant |
| 10207 | GO_ENDOCYTTIC_VESICLE_MEMBRANE                                     | 1.18 | 0.79 | 0 | 0 | 0 | not significant |
| 10208 | SMID_BREAST_CANCER_RELAPSE_IN_BONE_DN                              | 1.18 | 0.79 | 0 | 0 | 0 | not significant |
| 10209 | GO_NEGATIVE_REGULATION_OF_CELL_ADHESION                            | 1.18 | 0.78 | 0 | 0 | 0 | not significant |
| 10210 | GO_CARBOHYDRATE_BIOSYNTHETIC_PROCESS                               | 1.18 | 0.76 | 0 | 0 | 0 | not significant |
| 10211 | GO_REGULATION_OF_EXTRINSIC_APOPTOTIC_SIGNALING_PATHWAY             | 1.18 | 0.75 | 0 | 0 | 0 | not significant |
| 10212 | SENGUPTA_NASOPHARYNGEAL_CARCINOMA_DN                               | 1.18 | 0.75 | 0 | 0 | 0 | not significant |
| 10213 | YAGI_AML_SURVIVAL                                                  | 1.18 | 0.74 | 0 | 0 | 0 | not significant |
| 10214 | GO_POSITIVE_REGULATION_OF_PEPTIDYL_TYROSINE_PHOSPHORYLATION        | 1.18 | 0.73 | 0 | 0 | 0 | not significant |
| 10215 | GO_ENDOSOME_ORGANIZATION                                           | 1.18 | 0.71 | 0 | 0 | 0 | not significant |
| 10216 | GO_POSITIVE_REGULATION_OF_ERK1_AND_ERK2_CASCADE                    | 1.18 | 0.71 | 0 | 0 | 0 | not significant |
| 10217 | GO_EPIDERMAL_GROWTH_FACTOR_RECEPTOR_SIGNALING_PATHWAY              | 1.18 | 0.7  | 0 | 0 | 0 | not significant |
| 10218 | PID_MYC_REPRESS_PATHWAY                                            | 1.18 | 0.7  | 0 | 0 | 0 | not significant |
| 10219 | SCHLOSSER_SERUM_RESPONSE_UP                                        | 1.18 | 0.69 | 0 | 0 | 0 | not significant |
| 10220 | GO_ADULT_BEHAVIOR                                                  | 1.18 | 0.68 | 0 | 0 | 0 | not significant |
| 10221 | REACTOME_INTERLEUKIN_4_AND_INTERLEUKIN_13_SIGNALING                | 1.18 | 0.68 | 0 | 0 | 0 | not significant |
| 10222 | GO_REGULATION_OF_STRIATED_MUSCLE_CELL_DIFFERENTIATION              | 1.18 | 0.67 | 0 | 0 | 0 | not significant |
| 10223 | PID_P75_NTR_PATHWAY                                                | 1.18 | 0.67 | 0 | 0 | 0 | not significant |
| 10224 | SNF5_DN.V1_DN                                                      | 1.18 | 0.67 | 0 | 0 | 0 | not significant |
| 10225 | GO_CHROMOSOME_ORGANIZATION_INVOLVED_IN_MEIOTIC_CELL_CYCLE          | 1.18 | 0.66 | 0 | 0 | 0 | not significant |
| 10226 | GO_MAMMARY_GLAND_EPITHELIUM_DEVELOPMENT                            | 1.18 | 0.66 | 0 | 0 | 0 | not significant |
| 10227 | SMIRNOV_RESPONSE_TO_IR_2HR_DN                                      | 1.18 | 0.66 | 0 | 0 | 0 | not significant |
| 10228 | REACTOME_SEMAPHORIN_INTERACTIONS                                   | 1.18 | 0.65 | 0 | 0 | 0 | not significant |
| 10229 | GO_NUCLEOTIDE_BINDING_DOMAIN_LEUCINE_RICH_REPEAT_CONTAINING_RECEPT | 1.18 | 0.64 | 0 | 0 | 0 | not significant |
| 10230 | HOSHIDA_LIVER_CANCER_SURVIVAL_UP                                   | 1.18 | 0.64 | 0 | 0 | 0 | not significant |
| 10231 | MEISSNER_NPC_HCP_WITH_H3K4ME3_AND_H3K27ME3                         | 1.18 | 0.64 | 0 | 0 | 0 | not significant |
| 10232 | GO_MEMBRANE_PROTEIN_ECTODOMAIN_PROTEOLYSIS                         | 1.18 | 0.63 | 0 | 0 | 0 | not significant |
| 10233 | GO_MONOSACCHARIDE_CATABOLIC_PROCESS                                | 1.18 | 0.63 | 0 | 0 | 0 | not significant |
| 10234 | GO_REGULATION_OF_OSTEOCLAST_DIFFERENTIATION                        | 1.18 | 0.63 | 0 | 0 | 0 | not significant |

|       |                                                                               |      |      |   |   |   |                 |
|-------|-------------------------------------------------------------------------------|------|------|---|---|---|-----------------|
| 10235 | LUCAS_HNF4A_TARGETS_UP                                                        | 1.18 | 0.63 | 0 | 0 | 0 | not significant |
| 10236 | BREDEMEYER_RAG_SIGNALING_NOT_VIA_ATM_DN                                       | 1.18 | 0.62 | 0 | 0 | 0 | not significant |
| 10237 | GO_REGULATION_OF_RESPONSE_TO_REACTIVE_OXYGEN_SPECIES                          | 1.18 | 0.62 | 0 | 0 | 0 | not significant |
| 10238 | DELACROIX_RAR_TARGETS_UP                                                      | 1.18 | 0.61 | 0 | 0 | 0 | not significant |
| 10239 | GAZIN_EPIGENETIC_SILENCING_BY_KRAS                                            | 1.18 | 0.61 | 0 | 0 | 0 | not significant |
| 10240 | GO_OVULATION_CYCLE                                                            | 1.18 | 0.61 | 0 | 0 | 0 | not significant |
| 10241 | GO_POSITIVE_REGULATION_OF_RELEASE_OF_CYTOCHROME_C_FROM_MITOCHONDRION          | 1.18 | 0.61 | 0 | 0 | 0 | not significant |
| 10242 | GO_ROUGH_ENDOPLASMIC_RETICULUM_MEMBRANE                                       | 1.18 | 0.61 | 0 | 0 | 0 | not significant |
| 10243 | GO_REGULATION_OF_GLYCOGEN_METABOLIC_PROCESS                                   | 1.18 | 0.6  | 0 | 0 | 0 | not significant |
| 10244 | GO_RRNA_CATABOLIC_PROCESS                                                     | 1.18 | 0.6  | 0 | 0 | 0 | not significant |
| 10245 | PID_LYMPH_ANGIOGENESIS_PATHWAY                                                | 1.18 | 0.6  | 0 | 0 | 0 | not significant |
| 10246 | GARGALOVIC_RESPONSE_TO_OXIDIZED_PHOSPHOLIPIDS_RED_UP                          | 1.18 | 0.59 | 0 | 0 | 0 | not significant |
| 10247 | GO_CYTOKINE_PRODUCTION_INVOLVED_IN_INFLAMMATORY_RESPONSE                      | 1.18 | 0.59 | 0 | 0 | 0 | not significant |
| 10248 | GO_REGULATION_OF_B_CELL_DIFFERENTIATION                                       | 1.18 | 0.59 | 0 | 0 | 0 | not significant |
| 10249 | GO_TRIGLYCERIDE_METABOLIC_PROCESS                                             | 1.18 | 0.59 | 0 | 0 | 0 | not significant |
| 10250 | GO_NEGATIVE_REGULATION_OF_TRANSLATIONAL_INITIATION                            | 1.18 | 0.58 | 0 | 0 | 0 | not significant |
| 10251 | GO_AMINE_CATABOLIC_PROCESS                                                    | 1.18 | 0.57 | 0 | 0 | 0 | not significant |
| 10252 | GO_BONE_MARROW_DEVELOPMENT                                                    | 1.18 | 0.57 | 0 | 0 | 0 | not significant |
| 10253 | GO_CELL_TRAILING_EDGE                                                         | 1.18 | 0.57 | 0 | 0 | 0 | not significant |
| 10254 | GO_NEGATIVE_REGULATION_OF_PRODUCTION_OF_MOLECULAR_MEDIATOR_OF_IMMUNE_RESPONSE | 1.18 | 0.57 | 0 | 0 | 0 | not significant |
| 10255 | GO_PREASSEMBLY_OF_GPI_ANCHOR_IN_ER_MEMBRANE                                   | 1.18 | 0.57 | 0 | 0 | 0 | not significant |
| 10256 | GO_PROTEIN_LOCALIZATION_TO_PHAGOSOME_ASSEMBLY_SITE                            | 1.18 | 0.57 | 0 | 0 | 0 | not significant |
| 10257 | GO_REGULATION_OF_SNARE_COMPLEX_ASSEMBLY                                       | 1.18 | 0.57 | 0 | 0 | 0 | not significant |
| 10258 | KOHOUTEK_CNTN2_TARGETS                                                        | 1.18 | 0.57 | 0 | 0 | 0 | not significant |
| 10259 | GO_CILIUM_MOVEMENT_INVOLVED_IN_CELL_MOTILITY                                  | 1.18 | 0.56 | 0 | 0 | 0 | not significant |
| 10260 | GO_G_PROTEIN_COUPLED_CHEMOATTRACTANT_RECEPTOR_ACTIVITY                        | 1.18 | 0.56 | 0 | 0 | 0 | not significant |
| 10261 | GO_NEURON_PROJECTION_ARBORIZATION                                             | 1.18 | 0.56 | 0 | 0 | 0 | not significant |
| 10262 | GRANDVAUX_IRF3_TARGETS_UP                                                     | 1.18 | 0.56 | 0 | 0 | 0 | not significant |
| 10263 | BARRIER_CANCER_RELAPSE_TUMOR_SAMPLE_UP                                        | 1.18 | 0.55 | 0 | 0 | 0 | not significant |
| 10264 | GO_ANTIBIOTIC_BIOSYNTHETIC_PROCESS                                            | 1.18 | 0.54 | 0 | 0 | 0 | not significant |
| 10265 | GO_CELL_JUNCTION_MAINTENANCE                                                  | 1.18 | 0.54 | 0 | 0 | 0 | not significant |
| 10266 | NIELSEN_GIST_AND_SYNOVIAL_SARCOMA_DN                                          | 1.18 | 0.54 | 0 | 0 | 0 | not significant |
| 10267 | GO_REGULATION_OF_ANTIEN_PROCESSING_AND_PRESENTATION                           | 1.18 | 0.53 | 0 | 0 | 0 | not significant |
| 10268 | GO_SINGLE_STRANDED_DNA_3_5_EXODEOXYRIBONUCLEASE_ACTIVITY                      | 1.18 | 0.53 | 0 | 0 | 0 | not significant |
| 10269 | GO_TETRAHYDROFOLATE_METABOLIC_PROCESS                                         | 1.18 | 0.53 | 0 | 0 | 0 | not significant |
| 10270 | KEGG_FOLATE_BIOSYNTHESIS                                                      | 1.18 | 0.53 | 0 | 0 | 0 | not significant |
| 10271 | REACTOME_IKBA_VARIANT_LEADS_TO_EDA_ID                                         | 1.18 | 0.53 | 0 | 0 | 0 | not significant |
| 10272 | SASAI_TARGETS_OF_CXCR6_AND_PTCH1_UP                                           | 1.18 | 0.53 | 0 | 0 | 0 | not significant |
| 10273 | GO_CARDIOLIPIN_BINDING                                                        | 1.18 | 0.52 | 0 | 0 | 0 | not significant |
| 10274 | GO_REGULATION_OF_COLLATERAL_SPROUTING                                         | 1.18 | 0.52 | 0 | 0 | 0 | not significant |
| 10275 | GO_REGULATION_OF_SYSTEMIC_ARTERIAL_BLOOD_PRESSURE_BY_CIRCULATOR               | 1.18 | 0.52 | 0 | 0 | 0 | not significant |
| 10276 | GO_REGULATION_OF_XENOPHAGY                                                    | 1.18 | 0.52 | 0 | 0 | 0 | not significant |
| 10277 | GO_N_ACETYLSERAMINE_CATABOLIC_PROCESS                                         | 1.18 | 0.51 | 0 | 0 | 0 | not significant |
| 10278 | GO_POSTSYNAPTIC_DENSITY_PROTEIN_95_CLUSTERING                                 | 1.18 | 0.51 | 0 | 0 | 0 | not significant |
| 10279 | GO_SERINE_TRANSPORT                                                           | 1.18 | 0.5  | 0 | 0 | 0 | not significant |
| 10280 | REACTOME_TNFR1_MEDIATED_CERAMIDE_PRODUCTION                                   | 1.18 | 0.49 | 0 | 0 | 0 | not significant |
| 10281 | GO_REGULATION_OF_CELL_POPULATION_PROLIFERATION                                | 1.19 | 1.32 | 0 | 0 | 0 | not significant |
| 10282 | GO_EXOCYTOSIS                                                                 | 1.19 | 1.19 | 0 | 0 | 0 | not significant |
| 10283 | GO_CYTOKINE_MEDIATED_SIGNALING_PATHWAY                                        | 1.19 | 1.17 | 0 | 0 | 0 | not significant |
| 10284 | GO_REGULATION_OF_IMMUNE_RESPONSE                                              | 1.19 | 1.15 | 0 | 0 | 0 | not significant |
| 10285 | GO_IMPORT_INTO_CELL                                                           | 1.19 | 1.09 | 0 | 0 | 0 | not significant |
| 10286 | GO_CARBOHYDRATE_DERIVATIVE_BIOSYNTHETIC_PROCESS                               | 1.19 | 1.04 | 0 | 0 | 0 | not significant |
| 10287 | MARTINEZ_RB1_TARGETS_DN                                                       | 1.19 | 0.97 | 0 | 0 | 0 | not significant |
| 10288 | GO_POSITIVE_REGULATION_OF_ESTABLISHMENT_OF_PROTEIN_LOCALIZATION               | 1.19 | 0.93 | 0 | 0 | 0 | not significant |
| 10289 | GO_MEMBRANE_REGION                                                            | 1.19 | 0.88 | 0 | 0 | 0 | not significant |
| 10290 | CHR17Q25                                                                      | 1.19 | 0.84 | 0 | 0 | 0 | not significant |
| 10291 | JIANG_HYPOXIA_NORMAL                                                          | 1.19 | 0.83 | 0 | 0 | 0 | not significant |
| 10292 | CHR22Q13                                                                      | 1.19 | 0.81 | 0 | 0 | 0 | not significant |
| 10293 | WANG_CISPLATIN_RESPONSE_AND_XPC_UP                                            | 1.19 | 0.81 | 0 | 0 | 0 | not significant |
| 10294 | TONKS_TARGETS_OF_RUNX1_RUNX1T1_FUSION_HSC_DN                                  | 1.19 | 0.79 | 0 | 0 | 0 | not significant |
| 10295 | CAIRO_HEPATOBLASTOMA_CLASSES_DN                                               | 1.19 | 0.78 | 0 | 0 | 0 | not significant |
| 10296 | WANG_MLL_TARGETS                                                              | 1.19 | 0.78 | 0 | 0 | 0 | not significant |
| 10297 | GO_HEPATOBIILIARY_SYSTEM_DEVELOPMENT                                          | 1.19 | 0.77 | 0 | 0 | 0 | not significant |
| 10298 | GO_REGULATION_OF_RESPONSE_TO_CYTOKINE_STIMULUS                                | 1.19 | 0.77 | 0 | 0 | 0 | not significant |
| 10299 | AKT_UP_MTOR_DNV1_UP                                                           | 1.19 | 0.76 | 0 | 0 | 0 | not significant |
| 10300 | GO_ORGANIC_ACID_BINDING                                                       | 1.19 | 0.76 | 0 | 0 | 0 | not significant |
| 10301 | GO_HYDROLASE_ACTIVITY_ACTING_ON_CARBON_NITROGEN_BUT_NOT_PEPTIDE               | 1.19 | 0.73 | 0 | 0 | 0 | not significant |
| 10302 | GO_CORE_PROMOTER_BINDING                                                      | 1.19 | 0.71 | 0 | 0 | 0 | not significant |
| 10303 | GO_RESPONSE_TO_CALCIIUM_ION                                                   | 1.19 | 0.71 | 0 | 0 | 0 | not significant |
| 10304 | RELA_DNV1_DN                                                                  | 1.19 | 0.71 | 0 | 0 | 0 | not significant |
| 10305 | GO_BASE_EXCISION_REPAIR                                                       | 1.19 | 0.7  | 0 | 0 | 0 | not significant |
| 10306 | GO_PLASMA_MEMBRANE_ORGANIZATION                                               | 1.19 | 0.7  | 0 | 0 | 0 | not significant |
| 10307 | GO_REGULATION_OF_CYTOKINE_PRODUCTION_INVOLVED_IN_IMMUNE_RESPONSE              | 1.19 | 0.7  | 0 | 0 | 0 | not significant |
| 10308 | GO_MITOTIC_G2_M_TRANSITION_CHECKPOINT                                         | 1.19 | 0.68 | 0 | 0 | 0 | not significant |
| 10309 | GO_CELLULAR_RESPONSE_TO_VIRUS                                                 | 1.19 | 0.67 | 0 | 0 | 0 | not significant |
| 10310 | GO_CORE_PROMOTER_SEQUENCE_SPECIFIC_DNA_BINDING                                | 1.19 | 0.67 | 0 | 0 | 0 | not significant |
| 10311 | GO_RETINA_HOMEOSTASIS                                                         | 1.19 | 0.67 | 0 | 0 | 0 | not significant |
| 10312 | ONO_FOXP3_TARGETS_DN                                                          | 1.19 | 0.67 | 0 | 0 | 0 | not significant |
| 10313 | REACTOME_ACTIVATION_OF_ATR_IN_RESPONSE_TO_REPLICATION_STRESS                  | 1.19 | 0.67 | 0 | 0 | 0 | not significant |
| 10314 | REACTOME_FANCONI_ANEMIA_PATHWAY                                               | 1.19 | 0.67 | 0 | 0 | 0 | not significant |
| 10315 | GO_NEGATIVE_REGULATION_OF_VASCULATURE_DEVELOPMENT                             | 1.19 | 0.66 | 0 | 0 | 0 | not significant |
| 10316 | GO_CELLULAR_MODIFIED_AMINO_ACID_METABOLIC_PROCESS                             | 1.19 | 0.65 | 0 | 0 | 0 | not significant |
| 10317 | GO_REGULATION_OF_ERBB_SIGNALING_PATHWAY                                       | 1.19 | 0.65 | 0 | 0 | 0 | not significant |
| 10318 | GO_LIPOPOLYSACCHARIDE_MEDIATED_SIGNALING_PATHWAY                              | 1.19 | 0.64 | 0 | 0 | 0 | not significant |
| 10319 | GO_MALE_MEIOTIC_NUCLEAR_DIVISION                                              | 1.19 | 0.64 | 0 | 0 | 0 | not significant |
| 10320 | PID_P38_MKK3_6PATHWAY                                                         | 1.19 | 0.63 | 0 | 0 | 0 | not significant |
| 10321 | PID_PTP1B_PATHWAY                                                             | 1.19 | 0.63 | 0 | 0 | 0 | not significant |
| 10322 | GO_CYCLIN_BINDING                                                             | 1.19 | 0.62 | 0 | 0 | 0 | not significant |
| 10323 | GO_HYDROLASE_ACTIVITY_HYDROLYZING_N_GLYCOSYL_COMPOUNDS                        | 1.19 | 0.62 | 0 | 0 | 0 | not significant |
| 10324 | GO_LYMPHOCYTE_CHEMOTAXIS                                                      | 1.19 | 0.62 | 0 | 0 | 0 | not significant |
| 10325 | GO_NEUROEPITHELIAL_CELL_DIFFERENTIATION                                       | 1.19 | 0.62 | 0 | 0 | 0 | not significant |
| 10326 | REACTOME_CELL_JUNCTION_ORGANIZATION                                           | 1.19 | 0.62 | 0 | 0 | 0 | not significant |
| 10327 | WANG_RESPONSE_TO_BEXAROTENE_UP                                                | 1.19 | 0.62 | 0 | 0 | 0 | not significant |
| 10328 | GO_NEGATIVE_REGULATION_OF_CARDIAC_MUSCLE_TISSUE_DEVELOPMENT                   | 1.19 | 0.61 | 0 | 0 | 0 | not significant |
| 10329 | GO_NEGATIVE_REGULATION_OF_LIPID_STORAGE                                       | 1.19 | 0.61 | 0 | 0 | 0 | not significant |
| 10330 | GO_GLUTATHIONE_METABOLIC_PROCESS                                              | 1.19 | 0.6  | 0 | 0 | 0 | not significant |
| 10331 | GO_POSITIVE_REGULATION_OF_INTERLEUKIN_6_BIOSYNTHETIC_PROCESS                  | 1.19 | 0.6  | 0 | 0 | 0 | not significant |
| 10332 | HOLLEMAN ASPARAGINASE_RESISTANCE_ALL_DN                                       | 1.19 | 0.6  | 0 | 0 | 0 | not significant |
| 10333 | KEGG_GLYCEROLIPID_METABOLISM                                                  | 1.19 | 0.6  | 0 | 0 | 0 | not significant |
| 10334 | KEGG_NICOTINATE_AND_NICOTINAMIDE_METABOLISM                                   | 1.19 | 0.6  | 0 | 0 | 0 | not significant |
| 10335 | YANAGIHARA_ESX1_TARGETS                                                       | 1.19 | 0.6  | 0 | 0 | 0 | not significant |
| 10336 | GO GLUTAMINE_FAMILY_AMINO_ACID_BIOSYNTHETIC_PROCESS                           | 1.19 | 0.59 | 0 | 0 | 0 | not significant |
| 10337 | GO_NEGATIVE_REGULATION_OF_INTERFERON_BETA_PRODUCTION                          | 1.19 | 0.59 | 0 | 0 | 0 | not significant |
| 10338 | RICKMAN_HEAD_AND_NECK_CANCER_F                                                | 1.19 | 0.59 | 0 | 0 | 0 | not significant |
| 10339 | TORCHIA_TARGETS_OF_EWSR1_FL11_FUSION_TOP20_DN                                 | 1.19 | 0.59 | 0 | 0 | 0 | not significant |
| 10340 | GO_PEPTIDE_HORMONE_PROCESSING                                                 | 1.19 | 0.58 | 0 | 0 | 0 | not significant |
| 10341 | GO_REGULATION_OF_LIPOPROTEIN_LIPASE_ACTIVITY                                  | 1.19 | 0.58 | 0 | 0 | 0 | not significant |
| 10342 | GO_SEH1_ASSOCIATED_COMPLEX                                                    | 1.19 | 0.58 | 0 | 0 | 0 | not significant |
| 10343 | GO_DOPAMINE_TRANSPORT                                                         | 1.19 | 0.56 | 0 | 0 | 0 | not significant |

|       |                                                                     |      |      |   |   |   |                 |
|-------|---------------------------------------------------------------------|------|------|---|---|---|-----------------|
| 10344 | GO PROGRAMMED CELL DEATH IN RESPONSE TO REACTIVE OXYGEN SPECIES     | 1.19 | 0.56 | 0 | 0 | 0 | not significant |
| 10345 | PID_IL5_PATHWAY                                                     | 1.19 | 0.56 | 0 | 0 | 0 | not significant |
| 10346 | VANASSE_BCL2_TARGETS_UP                                             | 1.19 | 0.56 | 0 | 0 | 0 | not significant |
| 10347 | GO_POSITIVE_REGULATION_OF_CENTRIOLE_REPLICATION                     | 1.19 | 0.55 | 0 | 0 | 0 | not significant |
| 10348 | GO_PYRIMIDINE_DEOXYRIBONUCLEOSIDE_MONOPHOSPHATE_BIOSYNTHETIC_PRO    | 1.19 | 0.55 | 0 | 0 | 0 | not significant |
| 10349 | GO_RESPONSE_TO_LITHIUM_ION                                          | 1.19 | 0.55 | 0 | 0 | 0 | not significant |
| 10350 | GO_TROPOMYOSIN_BINDING                                              | 1.19 | 0.55 | 0 | 0 | 0 | not significant |
| 10351 | REACTOME_TP53_REGULATES_TRANSCRIPTION_OF_DEATH_RECEPTORS_AND_LI     | 1.19 | 0.55 | 0 | 0 | 0 | not significant |
| 10352 | GO_PURINERGIC_NUCLEOTIDE_RECEPTOR_SIGNALING_PATHWAY                 | 1.19 | 0.54 | 0 | 0 | 0 | not significant |
| 10353 | THILLAINADESAN_ZNF217_TARGETS_DN                                    | 1.19 | 0.54 | 0 | 0 | 0 | not significant |
| 10354 | GO_MYOSIN_II_BINDING                                                | 1.19 | 0.53 | 0 | 0 | 0 | not significant |
| 10355 | GO_REGULATION_OF_DNA_LIGATION                                       | 1.19 | 0.53 | 0 | 0 | 0 | not significant |
| 10356 | GOERING_BLOOD_HDL_CHOLESTEROL_QTL_TRANS                             | 1.19 | 0.53 | 0 | 0 | 0 | not significant |
| 10357 | SCHAEFFER_PROSTATE_DEVELOPMENT_AND_CANCER_BOX5_UP                   | 1.19 | 0.53 | 0 | 0 | 0 | not significant |
| 10358 | GO_ISOCITRATE_METABOLIC_PROCESS                                     | 1.19 | 0.52 | 0 | 0 | 0 | not significant |
| 10359 | GO_NEGATIVE_REGULATION_OF_FIBROBLAST_MIGRATION                      | 1.19 | 0.52 | 0 | 0 | 0 | not significant |
| 10360 | GO_NEGATIVE_REGULATION_OF_MACROPHAGE_CHEMOTAXIS                     | 1.19 | 0.52 | 0 | 0 | 0 | not significant |
| 10361 | GO_SINGLE_STRANDED_DNA_EXODEOXYRIBONUCLEASE_ACTIVITY                | 1.19 | 0.52 | 0 | 0 | 0 | not significant |
| 10362 | REACTOME_CS_DS_DEGRADATION                                          | 1.19 | 0.52 | 0 | 0 | 0 | not significant |
| 10363 | GO_CELLULAR_RESPONSE_TO_PURINE_CONTAINING_COMPOUND                  | 1.19 | 0.51 | 0 | 0 | 0 | not significant |
| 10364 | GO_PROTEIN_RETENTION_IN_GOLGI_APPARATUS                             | 1.19 | 0.51 | 0 | 0 | 0 | not significant |
| 10365 | GO_URETER_DEVELOPMENT                                               | 1.19 | 0.51 | 0 | 0 | 0 | not significant |
| 10366 | GO_REPRODUCTION                                                     | 1.20 | 1.4  | 0 | 0 | 0 | not significant |
| 10367 | GO_NEGATIVE_REGULATION_OF_MULTICELLULAR_ORGANISMAL_PROCESS          | 1.20 | 1.39 | 0 | 0 | 0 | not significant |
| 10368 | CREIGHTON_ENDOCRINE_THERAPY_RESISTANCE_3                            | 1.20 | 1.14 | 0 | 0 | 0 | not significant |
| 10369 | GO_COFACTOR_METABOLIC_PROCESS                                       | 1.20 | 1    | 0 | 0 | 0 | not significant |
| 10370 | CREIGHTON_ENDOCRINE_THERAPY_RESISTANCE_5                            | 1.20 | 0.99 | 0 | 0 | 0 | not significant |
| 10371 | GO_G_PROTEIN_COUPLED_RECEPTOR_SIGNALING_PATHWAY                     | 1.20 | 0.97 | 0 | 0 | 0 | not significant |
| 10372 | ZHOU_INFLAMMATORY_RESPONSE_LPS_UP                                   | 1.20 | 0.89 | 0 | 0 | 0 | not significant |
| 10373 | GO_ORGANIC_ACID_CATABOLIC_PROCESS                                   | 1.20 | 0.88 | 0 | 0 | 0 | not significant |
| 10374 | VANTVEER_BREAST_CANCER_ESR1_UP                                      | 1.20 | 0.88 | 0 | 0 | 0 | not significant |
| 10375 | HATADA_METHYLATED_IN_LUNG_CANCER_UP                                 | 1.20 | 0.87 | 0 | 0 | 0 | not significant |
| 10376 | RAO_BOUND_BY_SALL4                                                  | 1.20 | 0.84 | 0 | 0 | 0 | not significant |
| 10377 | GO_NEGATIVE_REGULATION_OF_SECRETION                                 | 1.20 | 0.83 | 0 | 0 | 0 | not significant |
| 10378 | REACTOME_OXIDATIVE_STRESS_INDUCED_SENESCENCE                        | 1.20 | 0.8  | 0 | 0 | 0 | not significant |
| 10379 | GO_NEGATIVE_REGULATION_OF_IMMUNE_EFFECTOR_PROCESS                   | 1.20 | 0.79 | 0 | 0 | 0 | not significant |
| 10380 | GO_SERINE_HYDROLASE_ACTIVITY                                        | 1.20 | 0.79 | 0 | 0 | 0 | not significant |
| 10381 | GROSS_HYPOXIA_VIA_ELK3_AND_HIF1A_UP                                 | 1.20 | 0.78 | 0 | 0 | 0 | not significant |
| 10382 | GO_EAR_DEVELOPMENT                                                  | 1.20 | 0.77 | 0 | 0 | 0 | not significant |
| 10383 | GO_CATION_CHANNEL_COMPLEX                                           | 1.20 | 0.75 | 0 | 0 | 0 | not significant |
| 10384 | GO_CYCLIC_NUCLEOTIDE_MEDIATED_SIGNALING                             | 1.20 | 0.73 | 0 | 0 | 0 | not significant |
| 10385 | GO_NEGATIVE_REGULATION_OF_RESPONSE_TO_ENDOPLASMIC_RETICULUM_STR     | 1.20 | 0.72 | 0 | 0 | 0 | not significant |
| 10386 | BERENJENO_ROCK_SIGNALING_NOT_VIA_RHOA_DN                            | 1.20 | 0.71 | 0 | 0 | 0 | not significant |
| 10387 | MORI_MATURE_B_LYMPHOCYTE_UP                                         | 1.20 | 0.71 | 0 | 0 | 0 | not significant |
| 10388 | MCCLUNG_CREB1_TARGETS_UP                                            | 1.20 | 0.7  | 0 | 0 | 0 | not significant |
| 10389 | GO_IMMUNOGLOBULIN_PRODUCTION_INVOLVED_IN_IMMUNOGLOBULIN_MEDIATED_   | 1.20 | 0.69 | 0 | 0 | 0 | not significant |
| 10390 | GO_POSITIVE_REGULATION_OF_MUSCLE_CELL_DIFFERENTIATION               | 1.20 | 0.69 | 0 | 0 | 0 | not significant |
| 10391 | GO_REGULATION_OF_PROTEIN_TYROSINE_KINASE_ACTIVITY                   | 1.20 | 0.68 | 0 | 0 | 0 | not significant |
| 10392 | REACTOME_NUCLEAR_RECEPTOR_TRANSCRIPTION_PATHWAY                     | 1.20 | 0.68 | 0 | 0 | 0 | not significant |
| 10393 | BIOCARTA_GH_PATHWAY                                                 | 1.20 | 0.67 | 0 | 0 | 0 | not significant |
| 10394 | GO_HEART_VALVE_DEVELOPMENT                                          | 1.20 | 0.67 | 0 | 0 | 0 | not significant |
| 10395 | GO_REGULATION_OF_PHOSPHOLIPASE_C_ACTIVITY                           | 1.20 | 0.66 | 0 | 0 | 0 | not significant |
| 10396 | GERHOLD_ADIPOGENESIS_DN                                             | 1.20 | 0.65 | 0 | 0 | 0 | not significant |
| 10397 | GO_REGULATION_OF_GLUONEOGENESIS                                     | 1.20 | 0.65 | 0 | 0 | 0 | not significant |
| 10398 | HOSHIDA_LIVER_CANCER_LATE_RECURRENCE_DN                             | 1.20 | 0.65 | 0 | 0 | 0 | not significant |
| 10399 | REACTOME_PEPTIDE_HORMONE_METABOLISM                                 | 1.20 | 0.65 | 0 | 0 | 0 | not significant |
| 10400 | CHR9P24                                                             | 1.20 | 0.64 | 0 | 0 | 0 | not significant |
| 10401 | DORSAM_HOXA9_TARGETS_DN                                             | 1.20 | 0.64 | 0 | 0 | 0 | not significant |
| 10402 | GO_REGULATION_OF_PROTEIN_MATURATION                                 | 1.20 | 0.64 | 0 | 0 | 0 | not significant |
| 10403 | GO_SNARE_COMPLEX_ASSEMBLY                                           | 1.20 | 0.64 | 0 | 0 | 0 | not significant |
| 10404 | REACTOME_TNFR1_INDUCED_NFKAPPAB_SIGNALING_PATHWAY                   | 1.20 | 0.64 | 0 | 0 | 0 | not significant |
| 10405 | GO_CORECEPTOR_ACTIVITY                                              | 1.20 | 0.63 | 0 | 0 | 0 | not significant |
| 10406 | GO_MAGNESIUM_ION_TRANSMEMBRANE_TRANSPORTER_ACTIVITY                 | 1.20 | 0.63 | 0 | 0 | 0 | not significant |
| 10407 | GO_POSITIVE_REGULATION_OF_LEUKOCYTE_DEGRANULATION                   | 1.20 | 0.63 | 0 | 0 | 0 | not significant |
| 10408 | HALLMARK_WNT_BETA_CATENIN_SIGNALING                                 | 1.20 | 0.63 | 0 | 0 | 0 | not significant |
| 10409 | REACTOME_SEMA4D_INDUCED_CELL_MIGRATION_AND_GROWTH_CONE_COLLAP       | 1.20 | 0.63 | 0 | 0 | 0 | not significant |
| 10410 | GO_ESTABLISHMENT_OF_PLANAR_POLARITY_OF_EMBRYONIC_EPITHELIUM         | 1.20 | 0.62 | 0 | 0 | 0 | not significant |
| 10411 | GO_GLYCOSYL_COMPOUND_CATABOLIC_PROCESS                              | 1.20 | 0.62 | 0 | 0 | 0 | not significant |
| 10412 | GO_MAGNESIUM_ION_TRANSPORT                                          | 1.20 | 0.62 | 0 | 0 | 0 | not significant |
| 10413 | GO_POSITIVE_REGULATION_OF_CD4_POSITIVE_ALPHA_BETA_T_CELL_ACTIVATION | 1.20 | 0.62 | 0 | 0 | 0 | not significant |
| 10414 | PID_PDGFRA_PATHWAY                                                  | 1.20 | 0.62 | 0 | 0 | 0 | not significant |
| 10415 | VERRECCHIA_DELAYED_RESPONSE_TO_TGFB1                                | 1.20 | 0.62 | 0 | 0 | 0 | not significant |
| 10416 | GO_MODIFIED_AMINO_ACID_TRANSPORT                                    | 1.20 | 0.61 | 0 | 0 | 0 | not significant |
| 10417 | GO_NEGATIVE_REGULATION_OF_EPITHELIAL_CELL_APOPTOTIC_PROCESS         | 1.20 | 0.61 | 0 | 0 | 0 | not significant |
| 10418 | GO_DETECTION_OF_MECHANICAL_STIMULUS                                 | 1.20 | 0.59 | 0 | 0 | 0 | not significant |
| 10419 | GO_BLEB                                                             | 1.20 | 0.58 | 0 | 0 | 0 | not significant |
| 10420 | GO_CYSTEINE_TYPE_ENDOPEPTIDASE_ACTIVITY_INVOLVED_IN_APOPTOTIC_SIGNM | 1.20 | 0.58 | 0 | 0 | 0 | not significant |
| 10421 | GO_MEMBRANE_HYPERPOLARIZATION                                       | 1.20 | 0.58 | 0 | 0 | 0 | not significant |
| 10422 | GO_RADIAL_GLIAL_CELL_DIFFERENTIATION                                | 1.20 | 0.58 | 0 | 0 | 0 | not significant |
| 10423 | COURTOIS_SENESCENCE_TRIGGERS                                        | 1.20 | 0.57 | 0 | 0 | 0 | not significant |
| 10424 | GO_BIOACTIVE_LIPID_RECEPTOR_ACTIVITY                                | 1.20 | 0.57 | 0 | 0 | 0 | not significant |
| 10425 | MATZUK_OVULATION                                                    | 1.20 | 0.57 | 0 | 0 | 0 | not significant |
| 10426 | GO_ISG15_PROTEIN_CONJUGATION                                        | 1.20 | 0.56 | 0 | 0 | 0 | not significant |
| 10427 | GO_LOCOMOTOR_RHYTHM                                                 | 1.20 | 0.56 | 0 | 0 | 0 | not significant |
| 10428 | GO_MICROVILLUS_ASSEMBLY                                             | 1.20 | 0.56 | 0 | 0 | 0 | not significant |
| 10429 | GO_POLYNUCLEOTIDE_DEPHOSPHORYLATION                                 | 1.20 | 0.56 | 0 | 0 | 0 | not significant |
| 10430 | SASSON_FSH_RESPONSE                                                 | 1.20 | 0.56 | 0 | 0 | 0 | not significant |
| 10431 | GO_CELL_PROLIFERATION_INVOLVED_IN_KIDNEY_DEVELOPMENT                | 1.20 | 0.55 | 0 | 0 | 0 | not significant |
| 10432 | GO_NEUREXIN_FAMILY_PROTEIN_BINDING                                  | 1.20 | 0.55 | 0 | 0 | 0 | not significant |
| 10433 | GO_PHOSPHORUS_OXYGEN_LYASE_ACTIVITY                                 | 1.20 | 0.55 | 0 | 0 | 0 | not significant |
| 10434 | CHR4Q26                                                             | 1.20 | 0.54 | 0 | 0 | 0 | not significant |
| 10435 | GO_EPITHELIAL_FLUID_TRANSPORT                                       | 1.20 | 0.54 | 0 | 0 | 0 | not significant |
| 10436 | REACTOME_ACYL_CHAIN_REMODELLING_OF_PS                               | 1.20 | 0.54 | 0 | 0 | 0 | not significant |
| 10437 | BAUS_TFF2_TARGETS_DN                                                | 1.20 | 0.53 | 0 | 0 | 0 | not significant |
| 10438 | GO_LIPOPHAGY                                                        | 1.20 | 0.53 | 0 | 0 | 0 | not significant |
| 10439 | YAMANAKA_GLIOMASTOMA_SURVIVAL_DN                                    | 1.20 | 0.52 | 0 | 0 | 0 | not significant |
| 10440 | GO_REGULATION_OF_MYD88_INDEPENDENT_TOLL_LIKE_RECEPTOR_SIGNALING_F   | 1.20 | 0.51 | 0 | 0 | 0 | not significant |
| 10441 | GO_CELLULAR_RESPONSE_TO_ENDOGENOUS_STIMULUS                         | 1.21 | 1.57 | 0 | 0 | 0 | not significant |
| 10442 | GO_RESPONSE_TO_CYTOKINE                                             | 1.21 | 1.4  | 0 | 0 | 0 | not significant |
| 10443 | GRAESSMANN_APOPTOSIS_BY_SERUM_DEPRIVATION_UP                        | 1.21 | 1.21 | 0 | 0 | 0 | not significant |
| 10444 | GO_DNA_REPLICATION                                                  | 1.21 | 1.05 | 0 | 0 | 0 | not significant |
| 10445 | GO_REGULATION_OF_HORMONE_LEVELS                                     | 1.21 | 1.05 | 0 | 0 | 0 | not significant |
| 10446 | NABA_MATRISOME                                                      | 1.21 | 1.01 | 0 | 0 | 0 | not significant |
| 10447 | DAZARD_RESPONSE_TO_UV_NHEK_UP                                       | 1.21 | 0.99 | 0 | 0 | 0 | not significant |
| 10448 | FERNANDEZ_BOUND_BY_MYC                                              | 1.21 | 0.87 | 0 | 0 | 0 | not significant |
| 10449 | CHR7Q22                                                             | 1.21 | 0.85 | 0 | 0 | 0 | not significant |
| 10450 | CYCLIN_D1_UP.V1_DN                                                  | 1.21 | 0.85 | 0 | 0 | 0 | not significant |
| 10451 | GO_ENDOPLASMIC_RETICULUM_GOLGI_INTERMEDIATE_COMPARTMENT             | 1.21 | 0.82 | 0 | 0 | 0 | not significant |
| 10452 | LU_IL4_SIGNALING                                                    | 1.21 | 0.82 | 0 | 0 | 0 | not significant |

|       |                                                                  |      |      |   |   |   |                 |
|-------|------------------------------------------------------------------|------|------|---|---|---|-----------------|
| 10453 | GO_RESPIRATORY_SYSTEM_DEVELOPMENT                                | 1.21 | 0.81 | 0 | 0 | 0 | not significant |
| 10454 | GO_RESPONSE_TO_FIBROBLAST_GROWTH_FACTOR                          | 1.21 | 0.78 | 0 | 0 | 0 | not significant |
| 10455 | GO_STEROID_HORMONE_RECEPTOR_BINDING                              | 1.21 | 0.78 | 0 | 0 | 0 | not significant |
| 10456 | CHIANG_LIVER_CANCER_SUBCLASS_CTNNB1_UP                           | 1.21 | 0.77 | 0 | 0 | 0 | not significant |
| 10457 | GO_INTRINSIC_APOPTOTIC_SIGNALING_PATHWAY_BY_P53_CLASS_MEDIATOR   | 1.21 | 0.77 | 0 | 0 | 0 | not significant |
| 10458 | GO_ORGANOPHOSPHATE_ESTER_TRANSPORT                               | 1.21 | 0.77 | 0 | 0 | 0 | not significant |
| 10459 | NGUYEN_NOTCH1_TARGETS_DN                                         | 1.21 | 0.75 | 0 | 0 | 0 | not significant |
| 10460 | REACTOME_FCFER1_MEDIATED_MAPK_ACTIVATION                         | 1.21 | 0.74 | 0 | 0 | 0 | not significant |
| 10461 | REACTOME_SPHINGOLIPID_METABOLISM                                 | 1.21 | 0.73 | 0 | 0 | 0 | not significant |
| 10462 | GO_LIPID_DROPLET                                                 | 1.21 | 0.72 | 0 | 0 | 0 | not significant |
| 10463 | GO_CIS_GOLGI_NETWORK                                             | 1.21 | 0.71 | 0 | 0 | 0 | not significant |
| 10464 | GO_RECEPTOR_CLUSTERING                                           | 1.21 | 0.71 | 0 | 0 | 0 | not significant |
| 10465 | CHEBOTAEV_GR_TARGETS_UP                                          | 1.21 | 0.7  | 0 | 0 | 0 | not significant |
| 10466 | GO_POSITIVE_REGULATION_OF_LIPID_BIOSYNTHETIC_PROCESS             | 1.21 | 0.7  | 0 | 0 | 0 | not significant |
| 10467 | GO_POSITIVE_REGULATION_OF_MYELOID_LEUKOCYTE_DIFFERENTIATION      | 1.21 | 0.7  | 0 | 0 | 0 | not significant |
| 10468 | GO_T_CELL_MIGRATION                                              | 1.21 | 0.7  | 0 | 0 | 0 | not significant |
| 10469 | KRAS.KIDNEY_UP.V1_UP                                             | 1.21 | 0.7  | 0 | 0 | 0 | not significant |
| 10470 | GO_LONG_CHAIN_FATTY_ACID_METABOLIC_PROCESS                       | 1.21 | 0.69 | 0 | 0 | 0 | not significant |
| 10471 | GO_PHOSPHOLIPID_TRANSPORT                                        | 1.21 | 0.69 | 0 | 0 | 0 | not significant |
| 10472 | GO_DNA_CATABOLIC_PROCESS                                         | 1.21 | 0.68 | 0 | 0 | 0 | not significant |
| 10473 | LIAN_LIPA_TARGETS_6M                                             | 1.21 | 0.68 | 0 | 0 | 0 | not significant |
| 10474 | LEIN_NEURON_MARKERS                                              | 1.21 | 0.67 | 0 | 0 | 0 | not significant |
| 10475 | STAMBOLSKY_TARGETS_OF_MUTATED_TP53_DN                            | 1.21 | 0.67 | 0 | 0 | 0 | not significant |
| 10476 | CHR4Q22                                                          | 1.21 | 0.66 | 0 | 0 | 0 | not significant |
| 10477 | GO_INTERLEUKIN_6_SECRETION                                       | 1.21 | 0.66 | 0 | 0 | 0 | not significant |
| 10478 | GO_REGULATION_OF_B_CELL_MEDIATED_IMMUNITY                        | 1.21 | 0.66 | 0 | 0 | 0 | not significant |
| 10479 | GO_REGULATION_OF_BONE_MINERALIZATION                             | 1.21 | 0.66 | 0 | 0 | 0 | not significant |
| 10480 | GO_EXTRACELLULAR_MATRIX_BINDING                                  | 1.21 | 0.65 | 0 | 0 | 0 | not significant |
| 10481 | GO_PROTEIN_KINASE_C_BINDING                                      | 1.21 | 0.65 | 0 | 0 | 0 | not significant |
| 10482 | GO_MYELOID_DENDRITIC_CELL_DIFFERENTIATION                        | 1.21 | 0.64 | 0 | 0 | 0 | not significant |
| 10483 | GO_POSITIVE_REGULATION_OF_CELL_ADHESION_MEDIATED_BY_INTEGRIN     | 1.21 | 0.64 | 0 | 0 | 0 | not significant |
| 10484 | GO_INTESTINAL_EPITHELIAL_CELL_DIFFERENTIATION                    | 1.21 | 0.63 | 0 | 0 | 0 | not significant |
| 10485 | GO_PHOSPHOLIPASE_C_ACTIVITY                                      | 1.21 | 0.63 | 0 | 0 | 0 | not significant |
| 10486 | GO_POSITIVE_REGULATION_OF_B_CELL_DIFFERENTIATION                 | 1.21 | 0.63 | 0 | 0 | 0 | not significant |
| 10487 | GO_ATRIOVENTRICULAR_VALVE_DEVELOPMENT                            | 1.21 | 0.62 | 0 | 0 | 0 | not significant |
| 10488 | KASLER_HDAC7_TARGETS_1_DN                                        | 1.21 | 0.62 | 0 | 0 | 0 | not significant |
| 10489 | VALK_AML_CLUSTER_7                                               | 1.21 | 0.62 | 0 | 0 | 0 | not significant |
| 10490 | GO ASPARTIC TYPE PEPTIDASE ACTIVITY                              | 1.21 | 0.61 | 0 | 0 | 0 | not significant |
| 10491 | GO_CHONDROITIN_SULFATE_CATABOLIC_PROCESS                         | 1.21 | 0.61 | 0 | 0 | 0 | not significant |
| 10492 | GO_CYTOLYSIS                                                     | 1.21 | 0.61 | 0 | 0 | 0 | not significant |
| 10493 | REACTOME_SIGNALING_BY_CYTOSOLIC_FGFR1_FUSION_MUTANTS             | 1.21 | 0.61 | 0 | 0 | 0 | not significant |
| 10494 | GO_GDP_METABOLIC_PROCESS                                         | 1.21 | 0.6  | 0 | 0 | 0 | not significant |
| 10495 | GO_HISTONE_H3_K9_DEMETHYLATION                                   | 1.21 | 0.6  | 0 | 0 | 0 | not significant |
| 10496 | GO_POSITIVE_REGULATION_OF_FATTY_ACID_BIOSYNTHETIC_PROCESS        | 1.21 | 0.6  | 0 | 0 | 0 | not significant |
| 10497 | GO_RESPONSE_TO_GONADOTROPIN                                      | 1.21 | 0.6  | 0 | 0 | 0 | not significant |
| 10498 | HOLLERN_SOLID_NODULAR_BREAST_TUMOR_DN                            | 1.21 | 0.6  | 0 | 0 | 0 | not significant |
| 10499 | JI_CARCIINOGENESIS_BY_KRAS_AND_STK11_DN                          | 1.21 | 0.6  | 0 | 0 | 0 | not significant |
| 10500 | GO_CHEMOREPELLENT_ACTIVITY                                       | 1.21 | 0.59 | 0 | 0 | 0 | not significant |
| 10501 | GO_DIACYLGLYCEROL_KINASE_ACTIVITY                                | 1.21 | 0.59 | 0 | 0 | 0 | not significant |
| 10502 | GO_ENDOPLASMIC_RETICULUM_PALMITOYLTRANSFERASE_COMPLEX            | 1.21 | 0.59 | 0 | 0 | 0 | not significant |
| 10503 | GO_FUCOSYLATION                                                  | 1.21 | 0.59 | 0 | 0 | 0 | not significant |
| 10504 | GO_OTIC_VESICLE_DEVELOPMENT                                      | 1.21 | 0.59 | 0 | 0 | 0 | not significant |
| 10505 | GO_POSITIVE_REGULATION_OF_INTERLEUKIN_13_PRODUCTION              | 1.21 | 0.59 | 0 | 0 | 0 | not significant |
| 10506 | GO_EXTRACELLULAR_MATRIX_CONSTITUENT_SECRETION                    | 1.21 | 0.58 | 0 | 0 | 0 | not significant |
| 10507 | NEWMAN_ERCC6_TARGETS_DN                                          | 1.21 | 0.58 | 0 | 0 | 0 | not significant |
| 10508 | REACTOME_FORMATION_OF_FIBRIN_CLOT_CLOTTING_CASCADE               | 1.21 | 0.58 | 0 | 0 | 0 | not significant |
| 10509 | GO_CALCIIUM_ION_TRANSMEMBRANE_TRANSPORT_VIA_HIGH_VOLTAGE_GATED_C | 1.21 | 0.57 | 0 | 0 | 0 | not significant |
| 10510 | GO_STEROL_IMPORT                                                 | 1.21 | 0.57 | 0 | 0 | 0 | not significant |
| 10511 | GO_TRANSFORMING_GROWTH_FACTOR_BETA_RECEPTOR_CYTOPLASMIC_MEDIA    | 1.21 | 0.57 | 0 | 0 | 0 | not significant |
| 10512 | MALIK_REPRESSED_BY_ESTROGEN                                      | 1.21 | 0.57 | 0 | 0 | 0 | not significant |
| 10513 | MIZUKAMI_HYPOXIA_UP                                              | 1.21 | 0.57 | 0 | 0 | 0 | not significant |
| 10514 | PHESSE_TARGETS_OF_APC_AND_MBD2_UP                                | 1.21 | 0.57 | 0 | 0 | 0 | not significant |
| 10515 | GO_POLYAMINE_TRANSPORT                                           | 1.21 | 0.56 | 0 | 0 | 0 | not significant |
| 10516 | NIELSEN_GIST_VS_SYNOVIAL_SARCOMA_UP                              | 1.21 | 0.56 | 0 | 0 | 0 | not significant |
| 10517 | GO_NEGATIVE_REGULATION_OF_INTERLEUKIN_17_PRODUCTION              | 1.21 | 0.55 | 0 | 0 | 0 | not significant |
| 10518 | GO_CATECHOLAMINE_BIOSYNTHETIC_PROCESS                            | 1.21 | 0.54 | 0 | 0 | 0 | not significant |
| 10519 | GO_ENDOTHELIAL_CELL_MORPHOGENESIS                                | 1.21 | 0.54 | 0 | 0 | 0 | not significant |
| 10520 | GO_COMMON_MYELOID_PROGENITOR_CELL_PROLIFERATION                  | 1.21 | 0.52 | 0 | 0 | 0 | not significant |
| 10521 | GO_SMALL_MOLECULE_METABOLIC_PROCESS                              | 1.22 | 2.07 | 0 | 0 | 0 | not significant |
| 10522 | GO_IMMUNE_SYSTEM_DEVELOPMENT                                     | 1.22 | 1.53 | 0 | 0 | 0 | not significant |
| 10523 | RUTELLA_RESPONSE_TO_HGF_UP                                       | 1.22 | 1.21 | 0 | 0 | 0 | not significant |
| 10524 | CHR19P13                                                         | 1.22 | 1.18 | 0 | 0 | 0 | not significant |
| 10525 | GO_NEGATIVE_REGULATION_OF_IMMUNE_SYSTEM_PROCESS                  | 1.22 | 1.06 | 0 | 0 | 0 | not significant |
| 10526 | GO_REGULATION_OF_DNA_BINDING_TRANSCRIPTION_FACTOR_ACTIVITY       | 1.22 | 1.06 | 0 | 0 | 0 | not significant |
| 10527 | DEURIG_T_CELL_PROLYMPHOCTIC_LEUKEMIA_DN                          | 1.22 | 1.05 | 0 | 0 | 0 | not significant |
| 10528 | PEREZ_TP63_TARGETS                                               | 1.22 | 0.96 | 0 | 0 | 0 | not significant |
| 10529 | GO_NEGATIVE_REGULATION_OF_CELL_MOTILITY                          | 1.22 | 0.9  | 0 | 0 | 0 | not significant |
| 10530 | GO_CELLULAR_RESPONSE_TO_TOPOLOGICALLY_INCORRECT_PROTEIN          | 1.22 | 0.89 | 0 | 0 | 0 | not significant |
| 10531 | HALLMARK_EPITHELIAL_MESENCHYMAL_TRANSITION                       | 1.22 | 0.89 | 0 | 0 | 0 | not significant |
| 10532 | GO_SODIUM_ION_TRANSMEMBRANE_TRANSPORT                            | 1.22 | 0.86 | 0 | 0 | 0 | not significant |
| 10533 | VERHAAK_GLIOMASTOMA_CLASSICAL                                    | 1.22 | 0.86 | 0 | 0 | 0 | not significant |
| 10534 | GO_NEGATIVE_REGULATION_OF_LYMPHOCYTE_ACTIVATION                  | 1.22 | 0.84 | 0 | 0 | 0 | not significant |
| 10535 | GO_TOLL_LIKE_RECEPTOR_SIGNALING_PATHWAY                          | 1.22 | 0.84 | 0 | 0 | 0 | not significant |
| 10536 | GO_POSITIVE_REGULATION_OF_LIPID_METABOLIC_PROCESS                | 1.22 | 0.83 | 0 | 0 | 0 | not significant |
| 10537 | REACTOME_REPRODUCTION                                            | 1.22 | 0.83 | 0 | 0 | 0 | not significant |
| 10538 | AMUNDSON_GENOTOXIC_SIGNATURE                                     | 1.22 | 0.82 | 0 | 0 | 0 | not significant |
| 10539 | BROWNE_HCMV_INFECTION_18HR_DN                                    | 1.22 | 0.82 | 0 | 0 | 0 | not significant |
| 10540 | GO_CYTOKINE_BINDING                                              | 1.22 | 0.8  | 0 | 0 | 0 | not significant |
| 10541 | GO_CYTOKINE_RECEPTOR_ACTIVITY                                    | 1.22 | 0.76 | 0 | 0 | 0 | not significant |
| 10542 | GO_POTASSIUM_ION_TRANSMEMBRANE_TRANSPORTER_ACTIVITY              | 1.22 | 0.76 | 0 | 0 | 0 | not significant |
| 10543 | HALLMARK_IL6_JAK_STAT3_SIGNALING                                 | 1.22 | 0.76 | 0 | 0 | 0 | not significant |
| 10544 | GO_RESPONSE_TO_FATTY_ACID                                        | 1.22 | 0.75 | 0 | 0 | 0 | not significant |
| 10545 | MARSON_FOXP3_TARGETS_DN                                          | 1.22 | 0.75 | 0 | 0 | 0 | not significant |
| 10546 | GO_DEOXYRIBONUCLEASE_ACTIVITY                                    | 1.22 | 0.74 | 0 | 0 | 0 | not significant |
| 10547 | GO_LIGAND_GATED_CATION_CHANNEL_ACTIVITY                          | 1.22 | 0.74 | 0 | 0 | 0 | not significant |
| 10548 | GO_INTERSTRAND_CROSS_LINK_REPAIR                                 | 1.22 | 0.73 | 0 | 0 | 0 | not significant |
| 10549 | REACTOME_TERMINATION_OF_TRANSLESION_DNA_SYNTHESIS                | 1.22 | 0.73 | 0 | 0 | 0 | not significant |
| 10550 | GO_LENS_DEVELOPMENT_IN_CAMERA_TYPE_EYE                           | 1.22 | 0.72 | 0 | 0 | 0 | not significant |
| 10551 | GO_POSITIVE_REGULATION_OF_OSSIFICATION                           | 1.22 | 0.72 | 0 | 0 | 0 | not significant |
| 10552 | GO_PROTEOGLYCAN_BIOSYNTHETIC_PROCESS                             | 1.22 | 0.72 | 0 | 0 | 0 | not significant |
| 10553 | LINDSTEDT_DENDRITIC_CELL_MATURATION_C                            | 1.22 | 0.71 | 0 | 0 | 0 | not significant |
| 10554 | CHIANG_LIVER_CANCER_SUBCLASS_INTERFERON_DN                       | 1.22 | 0.7  | 0 | 0 | 0 | not significant |
| 10555 | GOTTWEIN_TARGETS_OF_KSHV_MIR_K12_11                              | 1.22 | 0.7  | 0 | 0 | 0 | not significant |
| 10556 | REACTOME_GAMMA_CARBOXYLATION_HYPUISINE_FORMATION_AND_ARYLSULFATF | 1.22 | 0.7  | 0 | 0 | 0 | not significant |
| 10557 | CHR5Q11                                                          | 1.22 | 0.69 | 0 | 0 | 0 | not significant |
| 10558 | ELLWOOD_MYC_TARGETS_DN                                           | 1.22 | 0.69 | 0 | 0 | 0 | not significant |
| 10559 | GO_AMINOGLYCAN_CATABOLIC_PROCESS                                 | 1.22 | 0.69 | 0 | 0 | 0 | not significant |
| 10560 | LEIN_CEREBELLUM_MARKERS                                          | 1.22 | 0.69 | 0 | 0 | 0 | not significant |
| 10561 | LINDGREN_BLADDER_CANCER_HIGH_RECURRENCE                          | 1.22 | 0.69 | 0 | 0 | 0 | not significant |

|       |                                                                      |      |      |   |   |   |                 |
|-------|----------------------------------------------------------------------|------|------|---|---|---|-----------------|
| 10562 | BURTON_ADIPOGENESIS_1                                                | 1.22 | 0.67 | 0 | 0 | 0 | not significant |
| 10563 | GO_CELLULAR_DEFENSE_RESPONSE                                         | 1.22 | 0.67 | 0 | 0 | 0 | not significant |
| 10564 | GO_NEGATIVE_REGULATION_OF_AXON_EXTENSION                             | 1.22 | 0.67 | 0 | 0 | 0 | not significant |
| 10565 | CHIBA_RESPONSE_TO_TSA_DN                                             | 1.22 | 0.66 | 0 | 0 | 0 | not significant |
| 10566 | GO_POTASSIUM_CHANNEL_ACTIVITY                                        | 1.22 | 0.66 | 0 | 0 | 0 | not significant |
| 10567 | LANDIS_BREAST_CANCER_PROGRESSION_UP                                  | 1.22 | 0.66 | 0 | 0 | 0 | not significant |
| 10568 | GO_CELL_DIFFERENTIATION_IN_SPINAL_CORD                               | 1.22 | 0.65 | 0 | 0 | 0 | not significant |
| 10569 | GO_POSITIVE_REGULATION_OF_ERAD_PATHWAY                               | 1.22 | 0.65 | 0 | 0 | 0 | not significant |
| 10570 | LIAN_LIPA_TARGETS_3M                                                 | 1.22 | 0.64 | 0 | 0 | 0 | not significant |
| 10571 | REACTOME_ARACHIDONIC_ACID_METABOLISM                                 | 1.22 | 0.64 | 0 | 0 | 0 | not significant |
| 10572 | REACTOME_INCRETIN_SYNTHESIS_SECRETION_AND_INACTIVATION               | 1.22 | 0.64 | 0 | 0 | 0 | not significant |
| 10573 | REACTOME_SYNDECAN_INTERACTIONS                                       | 1.22 | 0.64 | 0 | 0 | 0 | not significant |
| 10574 | GO_DEFENSE_RESPONSE_TO_FUNGUS                                        | 1.22 | 0.63 | 0 | 0 | 0 | not significant |
| 10575 | GO_NADPLUS_KINASE_ACTIVITY                                           | 1.22 | 0.63 | 0 | 0 | 0 | not significant |
| 10576 | FARMER_BREAST_CANCER_CLUSTER_3                                       | 1.22 | 0.62 | 0 | 0 | 0 | not significant |
| 10577 | GO_ANGIOGENESIS_INVOLVED_IN_WOUND_HEALING                            | 1.22 | 0.62 | 0 | 0 | 0 | not significant |
| 10578 | GO_OXIDOREDUCTASE_ACTIVITY_ACTING_ON_THE_ALDEHYDE_OR_OXO_GROUP_      | 1.22 | 0.62 | 0 | 0 | 0 | not significant |
| 10579 | GO_PHOSPHATIDYLINOSITOL_4_5_BISPHOSPHATE_5_PHOSPHATASE_ACTIVITY      | 1.22 | 0.62 | 0 | 0 | 0 | not significant |
| 10580 | WENG_POR_DOSAGE                                                      | 1.22 | 0.62 | 0 | 0 | 0 | not significant |
| 10581 | BIOCARTA_DSP_PATHWAY                                                 | 1.22 | 0.61 | 0 | 0 | 0 | not significant |
| 10582 | BUKANOVICH_T_LYMPHOCYTE_HOMING_ON_TUMOR_UP                           | 1.22 | 0.61 | 0 | 0 | 0 | not significant |
| 10583 | GO_POSITIVE_REGULATION_OF_GRANULOCYTE_DIFFERENTIATION                | 1.22 | 0.61 | 0 | 0 | 0 | not significant |
| 10584 | GO_TRANSFORMING_GROWTH_FACTOR_BETA1_PRODUCTION                       | 1.22 | 0.61 | 0 | 0 | 0 | not significant |
| 10585 | GO_TRANSMEMBRANE_RECEPTOR_PROTEIN_PHOSPHATASE_ACTIVITY               | 1.22 | 0.61 | 0 | 0 | 0 | not significant |
| 10586 | IZUKA_LIVER_CANCER_PROGRESSION_G2_G3_DN                              | 1.22 | 0.61 | 0 | 0 | 0 | not significant |
| 10587 | REACTOME_INTERLEUKIN_35_SIGNALING                                    | 1.22 | 0.61 | 0 | 0 | 0 | not significant |
| 10588 | ZHAN_MULTIPLE_MYELOMA_SPKED                                          | 1.22 | 0.61 | 0 | 0 | 0 | not significant |
| 10589 | GO_CUL7_RING_UBIQUITIN_LIGASE_COMPLEX                                | 1.22 | 0.6  | 0 | 0 | 0 | not significant |
| 10590 | MULLIGAN_NTF3_SIGNALING_VIA_INSR_AND_IGF1R_DN                        | 1.22 | 0.6  | 0 | 0 | 0 | not significant |
| 10591 | GO_DNA_REPLICATION_PREINITIATION_COMPLEX                             | 1.22 | 0.59 | 0 | 0 | 0 | not significant |
| 10592 | REACTOME_SIGNAL_ATTENUATION                                          | 1.22 | 0.59 | 0 | 0 | 0 | not significant |
| 10593 | EHLERS_ANEUPLOIDY_DN                                                 | 1.22 | 0.58 | 0 | 0 | 0 | not significant |
| 10594 | GO_GPI_ANCHOR_BINDING                                                | 1.22 | 0.58 | 0 | 0 | 0 | not significant |
| 10595 | GO_FATTY_ACID_ELONGATION                                             | 1.22 | 0.57 | 0 | 0 | 0 | not significant |
| 10596 | NIKOLSKY_BREAST_CANCER_17P11_AMPLICON                                | 1.22 | 0.57 | 0 | 0 | 0 | not significant |
| 10597 | ZHENG_FOXP3_TARGETS_IN_THYMUS_DN                                     | 1.22 | 0.56 | 0 | 0 | 0 | not significant |
| 10598 | BIOCARTA_NEUTROPHIL_PATHWAY                                          | 1.22 | 0.54 | 0 | 0 | 0 | not significant |
| 10599 | GO_SECRETORY_VESICLE                                                 | 1.23 | 1.61 | 0 | 0 | 0 | not significant |
| 10600 | GO_RESPONSE_TO_HORMONE                                               | 1.23 | 1.52 | 0 | 0 | 0 | not significant |
| 10601 | GO_POSITIVE_REGULATION_OF_CELL_POPULATION_PROLIFERATION              | 1.23 | 1.34 | 0 | 0 | 0 | not significant |
| 10602 | GO_CALCIIUM_ION_BINDING                                              | 1.23 | 1.13 | 0 | 0 | 0 | not significant |
| 10603 | GO_MONOVALENT_INORGANIC_CATION_TRANSPORT                             | 1.23 | 1.1  | 0 | 0 | 0 | not significant |
| 10604 | MIKKELSEN_NPC_ICP_WITH_H3K4ME3                                       | 1.23 | 1.09 | 0 | 0 | 0 | not significant |
| 10605 | RUTELLA_RESPONSE_TO_CSF2RB_AND_IL4_DN                                | 1.23 | 1.09 | 0 | 0 | 0 | not significant |
| 10606 | PYEON_CANCER_HEAD_AND_NECK_VS_CERVICAL_UP                            | 1.23 | 1.01 | 0 | 0 | 0 | not significant |
| 10607 | GO_RESPONSE_TO_CARBOHYDRATE                                          | 1.23 | 0.96 | 0 | 0 | 0 | not significant |
| 10608 | GO_NEGATIVE_REGULATION_OF_CELL_ACTIVATION                            | 1.23 | 0.92 | 0 | 0 | 0 | not significant |
| 10609 | HALLMARK_APICAL_JUNCTION                                             | 1.23 | 0.91 | 0 | 0 | 0 | not significant |
| 10610 | IZADPANAH_STEM_CELL_ADIPOSE_VS_BONE_UP                               | 1.23 | 0.89 | 0 | 0 | 0 | not significant |
| 10611 | SRC_UP.V1_DN                                                         | 1.23 | 0.89 | 0 | 0 | 0 | not significant |
| 10612 | ATF2_UP.V1_DN                                                        | 1.23 | 0.87 | 0 | 0 | 0 | not significant |
| 10613 | REACTOME_MEIOSIS                                                     | 1.23 | 0.87 | 0 | 0 | 0 | not significant |
| 10614 | PID_FCER1_PATHWAY                                                    | 1.23 | 0.86 | 0 | 0 | 0 | not significant |
| 10615 | GO_INTRINSIC_APOPTOTIC_SIGNALING_PATHWAY_IN_RESPONSE_TO_DNA_DAMAG    | 1.23 | 0.84 | 0 | 0 | 0 | not significant |
| 10616 | TSENG_IRS1_TARGETS_DN                                                | 1.23 | 0.82 | 0 | 0 | 0 | not significant |
| 10617 | GO_HEPARIN_BINDING                                                   | 1.23 | 0.81 | 0 | 0 | 0 | not significant |
| 10618 | GO_PROTEIN_N_LINKED_GLYCOSYLATION                                    | 1.23 | 0.81 | 0 | 0 | 0 | not significant |
| 10619 | PID_ERA_GENOMIC_PATHWAY                                              | 1.23 | 0.81 | 0 | 0 | 0 | not significant |
| 10620 | GO_PROTEIN_O_LINKED_GLYCOSYLATION                                    | 1.23 | 0.79 | 0 | 0 | 0 | not significant |
| 10621 | GO_REGULATION_OF_PHAGOCYTOSIS                                        | 1.23 | 0.79 | 0 | 0 | 0 | not significant |
| 10622 | REACTOME_MEIOTIC_RECOMBINATION                                       | 1.23 | 0.79 | 0 | 0 | 0 | not significant |
| 10623 | BOYLAN_MULTIPLE_MYELOMA_PCA3_UP                                      | 1.23 | 0.78 | 0 | 0 | 0 | not significant |
| 10624 | GO_CELLULAR_RESPONSE_TO_CAMP                                         | 1.23 | 0.77 | 0 | 0 | 0 | not significant |
| 10625 | KEGG_VIRAL_MYOCARDITIS                                               | 1.23 | 0.77 | 0 | 0 | 0 | not significant |
| 10626 | CHR5Q14                                                              | 1.23 | 0.75 | 0 | 0 | 0 | not significant |
| 10627 | MAGRANGEAS_MULTIPLE_MYELOMA_IGLL_VS_IGLK_UP                          | 1.23 | 0.74 | 0 | 0 | 0 | not significant |
| 10628 | GO_POSITIVE_REGULATION_OF_TUMOR_NECROSIS_FACTOR_SUPERFAMILY_CYTC     | 1.23 | 0.73 | 0 | 0 | 0 | not significant |
| 10629 | GO_REGULATION_OF_FATTY_ACID_BIOSYNTHETIC_PROCESS                     | 1.23 | 0.73 | 0 | 0 | 0 | not significant |
| 10630 | GO_ORGANISM_EMERGENCE_FROM_PROTECTIVE_STRUCTURE                      | 1.23 | 0.72 | 0 | 0 | 0 | not significant |
| 10631 | GOBERT_CORE_OLIGODENDROCYTE_DIFFERENTIATION                          | 1.23 | 0.71 | 0 | 0 | 0 | not significant |
| 10632 | BOWIE_RESPONSE_TO_TAMOXIFEN                                          | 1.23 | 0.69 | 0 | 0 | 0 | not significant |
| 10633 | GO_LAMIN_BINDING                                                     | 1.23 | 0.69 | 0 | 0 | 0 | not significant |
| 10634 | CHR4P15                                                              | 1.23 | 0.68 | 0 | 0 | 0 | not significant |
| 10635 | GO_TERTIARY_GRANULE_LUMEN                                            | 1.23 | 0.68 | 0 | 0 | 0 | not significant |
| 10636 | PID_RXR_VDR_PATHWAY                                                  | 1.23 | 0.68 | 0 | 0 | 0 | not significant |
| 10637 | CHR5Q22                                                              | 1.23 | 0.67 | 0 | 0 | 0 | not significant |
| 10638 | GO_CELLULAR_RESPONSE_TO_CADMIUM_ION                                  | 1.23 | 0.67 | 0 | 0 | 0 | not significant |
| 10639 | GO_NEGATIVE_REGULATION_OF_INTERLEUKIN_6_PRODUCTION                   | 1.23 | 0.67 | 0 | 0 | 0 | not significant |
| 10640 | GO_REGULATION_OF_MESENCHYMAL_CELL_PROLIFERATION                      | 1.23 | 0.67 | 0 | 0 | 0 | not significant |
| 10641 | KEGG_GLYCOSYLPHOSPHATIDYLINOSITOL_GPI_ANCHOR_BIOSYNTHESIS            | 1.23 | 0.67 | 0 | 0 | 0 | not significant |
| 10642 | GO_REGULATION_OF_CD4_POSITIVE_ALPHA_BETA_T_CELL_DIFFERENTIATION      | 1.23 | 0.66 | 0 | 0 | 0 | not significant |
| 10643 | SANCHEZ_MDM2_TARGETS                                                 | 1.23 | 0.66 | 0 | 0 | 0 | not significant |
| 10644 | GO_HISTONE_H4_K5_ACETYLATION                                         | 1.23 | 0.65 | 0 | 0 | 0 | not significant |
| 10645 | GO_SIALYLATION                                                       | 1.23 | 0.65 | 0 | 0 | 0 | not significant |
| 10646 | GO_PURINE_NUCLEOSIDE_DIPHOSPHATE_METABOLIC_PROCESS                   | 1.23 | 0.64 | 0 | 0 | 0 | not significant |
| 10647 | BIOCARTA_CTL_PATHWAY                                                 | 1.23 | 0.63 | 0 | 0 | 0 | not significant |
| 10648 | GO_NEGATIVE_REGULATION_OF_VASCULAR_SMOOTH_MUSCLE_CELL_PROLIFERA      | 1.23 | 0.63 | 0 | 0 | 0 | not significant |
| 10649 | GO_REGULATION_OF_T_CELL_DIFFERENTIATION_IN_THYMUS                    | 1.23 | 0.63 | 0 | 0 | 0 | not significant |
| 10650 | GO_VOLTAGE_GATED_ANION_CHANNEL_ACTIVITY                              | 1.23 | 0.63 | 0 | 0 | 0 | not significant |
| 10651 | GO_POSITIVE_REGULATION_OF_VASCULAR_ENDOTHELIAL_CELL_PROLIFERATION    | 1.23 | 0.62 | 0 | 0 | 0 | not significant |
| 10652 | GO_ESCRT_III_COMPLEX                                                 | 1.23 | 0.61 | 0 | 0 | 0 | not significant |
| 10653 | GO_POSTSYNAPTIC_RECYCLING_ENDOSOME                                   | 1.23 | 0.61 | 0 | 0 | 0 | not significant |
| 10654 | GO_REGULATION_OF_ENDOCYTTIC_RECYCLING                                | 1.23 | 0.61 | 0 | 0 | 0 | not significant |
| 10655 | KEGG_GLYCOSPHINGOLIPID_BIOSYNTHESIS_GANGLIO_SERIES                   | 1.23 | 0.61 | 0 | 0 | 0 | not significant |
| 10656 | REACTOME_SYNTHESIS_OF_KETONE_BODIES                                  | 1.23 | 0.61 | 0 | 0 | 0 | not significant |
| 10657 | GO_OXOGLUTARATE_DEHYDROGENASE_COMPLEX                                | 1.23 | 0.6  | 0 | 0 | 0 | not significant |
| 10658 | REACTOME_INTERLEUKIN_27_SIGNALING                                    | 1.23 | 0.59 | 0 | 0 | 0 | not significant |
| 10659 | GO_REGULATION_OF_ODONTOGENESIS                                       | 1.23 | 0.58 | 0 | 0 | 0 | not significant |
| 10660 | GO_SERINE_TRANSMEMBRANE_TRANSPORTER_ACTIVITY                         | 1.23 | 0.58 | 0 | 0 | 0 | not significant |
| 10661 | HINATA_NFKB_IMMU_INF                                                 | 1.23 | 0.58 | 0 | 0 | 0 | not significant |
| 10662 | GO_INDUCTION_OF_POSITIVE_CHEMOTAXIS                                  | 1.23 | 0.57 | 0 | 0 | 0 | not significant |
| 10663 | GO_POSITIVE_REGULATION_OF_INTRINSIC_APOPTOTIC_SIGNALING_PATHWAY_IN_I | 1.23 | 0.53 | 0 | 0 | 0 | not significant |
| 10664 | GO_BIOLOGICAL_ADHESION                                               | 1.24 | 1.67 | 0 | 0 | 0 | not significant |
| 10665 | GO_ANATOMICAL_STRUCTURE_FORMATION_INVOLVED_IN_MORPHOGENESIS          | 1.24 | 1.55 | 0 | 0 | 0 | not significant |
| 10666 | GO_REGULATION_OF_CELLULAR_COMPONENT_MOVEMENT                         | 1.24 | 1.49 | 0 | 0 | 0 | not significant |
| 10667 | GO_SECRETORY_GRANULE                                                 | 1.24 | 1.44 | 0 | 0 | 0 | not significant |
| 10668 | MARTENS_BOUND_BY_PML_RARA_FUSION                                     | 1.24 | 1.31 | 0 | 0 | 0 | not significant |
| 10669 | ZHOU_INFLAMMATORY_RESPONSE_LIVE_DN                                   | 1.24 | 1.18 | 0 | 0 | 0 | not significant |
| 10670 | JISON_SICKLE_CELL_DISEASE_DN                                         | 1.24 | 1.05 | 0 | 0 | 0 | not significant |

|       |                                                                  |      |      |   |   |   |                 |
|-------|------------------------------------------------------------------|------|------|---|---|---|-----------------|
| 10671 | ZHOU_INFLAMMATORY_RESPONSE_FIMA_DN                               | 1.24 | 1.03 | 0 | 0 | 0 | not significant |
| 10672 | GO_NEGATIVE_REGULATION_OF_LOCOMOTION                             | 1.24 | 1.01 | 0 | 0 | 0 | not significant |
| 10673 | GO_GOLGI_ASSOCIATED_VESICLE                                      | 1.24 | 0.94 | 0 | 0 | 0 | not significant |
| 10674 | HALLMARK_MYOGENESIS                                              | 1.24 | 0.94 | 0 | 0 | 0 | not significant |
| 10675 | GO_MEMBRANE_LIPID_BIOSYNTHETIC_PROCESS                           | 1.24 | 0.92 | 0 | 0 | 0 | not significant |
| 10676 | GAVIN_FOXP3_TARGETS_CLUSTER_T7                                   | 1.24 | 0.9  | 0 | 0 | 0 | not significant |
| 10677 | MTOR_UP.V1_UP                                                    | 1.24 | 0.9  | 0 | 0 | 0 | not significant |
| 10678 | RASHI_RESPONSE_TO_IONIZING_RADIATION_2                           | 1.24 | 0.89 | 0 | 0 | 0 | not significant |
| 10679 | ZHANG_RESPONSE_TO_IKK_INHIBITOR_AND_TNF_DN                       | 1.24 | 0.84 | 0 | 0 | 0 | not significant |
| 10680 | CARD_MIR302A_TARGETS                                             | 1.24 | 0.83 | 0 | 0 | 0 | not significant |
| 10681 | GO_INTERMEDIATE_FILAMENT_CYTOSKELETON                            | 1.24 | 0.83 | 0 | 0 | 0 | not significant |
| 10682 | GO_PEPTIDE_METABOLIC_PROCESS                                     | 1.24 | 0.83 | 0 | 0 | 0 | not significant |
| 10683 | GO_POSITIVE_REGULATION_OF_CHEMOTAXIS                             | 1.24 | 0.83 | 0 | 0 | 0 | not significant |
| 10684 | GO_CELLULAR_RESPONSE_TO_HYDROGEN_PEROXIDE                        | 1.24 | 0.82 | 0 | 0 | 0 | not significant |
| 10685 | GO_CYTOKINE_PRODUCTION_INVOLVED_IN_IMMUNE_RESPONSE               | 1.24 | 0.82 | 0 | 0 | 0 | not significant |
| 10686 | PTEN_DNV1_UP                                                     | 1.24 | 0.82 | 0 | 0 | 0 | not significant |
| 10687 | KRAS.AMP.LUNG_UP.V1_DN                                           | 1.24 | 0.81 | 0 | 0 | 0 | not significant |
| 10688 | GO_POSITIVE_REGULATION_OF_PRODUCTION_OF_MOLECULAR_MEDIATOR_OF_IL | 1.24 | 0.79 | 0 | 0 | 0 | not significant |
| 10689 | OHGUCHI_LIVER_HNF4A_TARGETS_DN                                   | 1.24 | 0.79 | 0 | 0 | 0 | not significant |
| 10690 | GO_DNA_DAMAGE_RESPONSE_DETECTION_OF_DNA_DAMAGE                   | 1.24 | 0.76 | 0 | 0 | 0 | not significant |
| 10691 | KEGG_MISMATCH_REPAIR                                             | 1.24 | 0.76 | 0 | 0 | 0 | not significant |
| 10692 | GO_REGULATION_OF_MEMBRANE_LIPID_DISTRIBUTION                     | 1.24 | 0.75 | 0 | 0 | 0 | not significant |
| 10693 | CASORELLI_APL_SECONDARY_VS_DE_NOVO_DN                            | 1.24 | 0.74 | 0 | 0 | 0 | not significant |
| 10694 | GO_NEGATIVE_REGULATION_OF_DNA_RECOMBINATION                      | 1.24 | 0.74 | 0 | 0 | 0 | not significant |
| 10695 | GO_PRI_MIRNA_TRANSCRIPTION_BY_RNA_POLYMERASE_II                  | 1.24 | 0.74 | 0 | 0 | 0 | not significant |
| 10696 | GO_REGULATION_OF_LIPID_STORAGE                                   | 1.24 | 0.74 | 0 | 0 | 0 | not significant |
| 10697 | KRAS.KIDNEY_UP.V1_DN                                             | 1.24 | 0.74 | 0 | 0 | 0 | not significant |
| 10698 | MORI_PLASMA_CELL_DN                                              | 1.24 | 0.74 | 0 | 0 | 0 | not significant |
| 10699 | NADLER_OBESITY_DN                                                | 1.24 | 0.74 | 0 | 0 | 0 | not significant |
| 10700 | REACTOME_NICOTINATE_METABOLISM                                   | 1.24 | 0.74 | 0 | 0 | 0 | not significant |
| 10701 | REACTOME_SIGNALING_BY_ERYTHROPOIETIN                             | 1.24 | 0.74 | 0 | 0 | 0 | not significant |
| 10702 | TURASHVILI_BREAST_LOBULAR_CARCINOMA_VS_LOBULAR_NORMAL_DN         | 1.24 | 0.74 | 0 | 0 | 0 | not significant |
| 10703 | GO_MYELOID_DENDRITIC_CELL_ACTIVATION                             | 1.24 | 0.73 | 0 | 0 | 0 | not significant |
| 10704 | GO_NEGATIVE_REGULATION_OF_MUSCLE_CELL_DIFFERENTIATION            | 1.24 | 0.73 | 0 | 0 | 0 | not significant |
| 10705 | GO_HEXOSE_CATABOLIC_PROCESS                                      | 1.24 | 0.72 | 0 | 0 | 0 | not significant |
| 10706 | REACTOME_MISCELLANEOUS_TRANSPORT_AND_BINDING_EVENTS              | 1.24 | 0.72 | 0 | 0 | 0 | not significant |
| 10707 | GO_MITOGEN_ACTIVATED_PROTEIN_KINASE_BINDING                      | 1.24 | 0.7  | 0 | 0 | 0 | not significant |
| 10708 | GO_NATURAL_KILLER_CELL_DIFFERENTIATION                           | 1.24 | 0.7  | 0 | 0 | 0 | not significant |
| 10709 | GO_REGULATION_OF_T_CELL_CYTOKINE_PRODUCTION                      | 1.24 | 0.7  | 0 | 0 | 0 | not significant |
| 10710 | GO_C_C_CHEMOKINE_BINDING                                         | 1.24 | 0.69 | 0 | 0 | 0 | not significant |
| 10711 | GO_POSITIVE_REGULATION_OF_INTERLEUKIN_6_SECRETION                | 1.24 | 0.69 | 0 | 0 | 0 | not significant |
| 10712 | GO_PHOTORECEPTOR_CELL_MAINTENANCE                                | 1.24 | 0.68 | 0 | 0 | 0 | not significant |
| 10713 | GO_POSITIVE_REGULATION_OF_MYOTUBE_DIFFERENTIATION                | 1.24 | 0.68 | 0 | 0 | 0 | not significant |
| 10714 | GO_TRANSMEMBRANE_RECEPTOR_PROTEIN_TYROSINE_KINASE_ACTIVITY       | 1.24 | 0.68 | 0 | 0 | 0 | not significant |
| 10715 | GO_INTERLEUKIN_13_PRODUCTION                                     | 1.24 | 0.67 | 0 | 0 | 0 | not significant |
| 10716 | GO_POSITIVE_REGULATION_OF_ISOTYPE_SWITCHING                      | 1.24 | 0.67 | 0 | 0 | 0 | not significant |
| 10717 | GO_POSITIVE_REGULATION_OF_T_CELL_CYTOKINE_PRODUCTION             | 1.24 | 0.67 | 0 | 0 | 0 | not significant |
| 10718 | GO_REGULATION_OF_DEFENSE_RESPONSE_TO_BACTERIUM                   | 1.24 | 0.67 | 0 | 0 | 0 | not significant |
| 10719 | WESTON_VEGFA_TARGETS_6HR                                         | 1.24 | 0.67 | 0 | 0 | 0 | not significant |
| 10720 | GO_PROTEIN_CATABOLIC_PROCESS_IN_THE_VACUOLE                      | 1.24 | 0.66 | 0 | 0 | 0 | not significant |
| 10721 | REACTOME_SYNAPTIC_ADHESION_LIKE_MOLECULES                        | 1.24 | 0.66 | 0 | 0 | 0 | not significant |
| 10722 | GO_ORNITHINE_DECARBOXYLASE_REGULATOR_ACTIVITY                    | 1.24 | 0.65 | 0 | 0 | 0 | not significant |
| 10723 | DONATO_CELL_CYCLE_TRETINOIN                                      | 1.24 | 0.64 | 0 | 0 | 0 | not significant |
| 10724 | GO_REPLICATION_FORK_PROTECTION                                   | 1.24 | 0.64 | 0 | 0 | 0 | not significant |
| 10725 | GO_SPINAL_CORD_MOTOR_NEURON_DIFFERENTIATION                      | 1.24 | 0.64 | 0 | 0 | 0 | not significant |
| 10726 | REACTOME_DEGRADATION_OF_CYSTEINE_AND_HOMOCYSTEINE                | 1.24 | 0.64 | 0 | 0 | 0 | not significant |
| 10727 | GO_REGULATION_OF_STEROID_HORMONE_BIOSYNTHETIC_PROCESS            | 1.24 | 0.63 | 0 | 0 | 0 | not significant |
| 10728 | MARSHALL_VIRAL_INFECTION_RESPONSE_UP                             | 1.24 | 0.63 | 0 | 0 | 0 | not significant |
| 10729 | REACTOME_CHONDROITIN_SULFATE_BIOSYNTHESIS                        | 1.24 | 0.63 | 0 | 0 | 0 | not significant |
| 10730 | REACTOME_KETONE_BODY_METABOLISM                                  | 1.24 | 0.63 | 0 | 0 | 0 | not significant |
| 10731 | GO_PHOSPHATE_ION_BINDING                                         | 1.24 | 0.62 | 0 | 0 | 0 | not significant |
| 10732 | GO_REGULATION_OF_HEPATOCTYCE_PROLIFERATION                       | 1.24 | 0.62 | 0 | 0 | 0 | not significant |
| 10733 | YAGUE_PRETUMOR_DRUG_RESISTANCE_DN                                | 1.24 | 0.62 | 0 | 0 | 0 | not significant |
| 10734 | GO_INTESTINAL_EPITHELIAL_CELL_DEVELOPMENT                        | 1.24 | 0.61 | 0 | 0 | 0 | not significant |
| 10735 | GO_PHOSPHATIDYLSERINE_ACYL_CHAIN_REMODELING                      | 1.24 | 0.61 | 0 | 0 | 0 | not significant |
| 10736 | GO_INTERLEUKIN_27_MEDIATED_SIGNALING_PATHWAY                     | 1.24 | 0.6  | 0 | 0 | 0 | not significant |
| 10737 | GO_MANNOSYL_OLIGOSACCHARIDE_1_2_ALPHA_MANNOSIDASE_ACTIVITY       | 1.24 | 0.6  | 0 | 0 | 0 | not significant |
| 10738 | GO_SIALYLTRANSFERASE_ACTIVITY                                    | 1.24 | 0.6  | 0 | 0 | 0 | not significant |
| 10739 | GO_REGULATION_OF_POLYAMINE_TRANSMEMBRANE_TRANSPORT               | 1.24 | 0.59 | 0 | 0 | 0 | not significant |
| 10740 | GO_CARBOHYDRATE_DERIVATIVE_METABOLIC_PROCESS                     | 1.25 | 1.68 | 0 | 0 | 0 | not significant |
| 10741 | KRIEG_HYPOXIA_NOT_VIA_KDM3A                                      | 1.25 | 1.56 | 0 | 0 | 0 | not significant |
| 10742 | REACTOME_METABOLISM_OF_LIPIDS                                    | 1.25 | 1.55 | 0 | 0 | 0 | not significant |
| 10743 | GO_REGULATION_OF_ESTABLISHMENT_OF_PROTEIN_LOCALIZATION           | 1.25 | 1.53 | 0 | 0 | 0 | not significant |
| 10744 | WANG_RESPONSE_TO_GSK3_INHIBITOR_SB216763_DN                      | 1.25 | 1.3  | 0 | 0 | 0 | not significant |
| 10745 | GO_GLYCEROLIPID_METABOLIC_PROCESS                                | 1.25 | 1.1  | 0 | 0 | 0 | not significant |
| 10746 | GO_REGULATION_OF_LEUKOCYTE_DIFFERENTIATION                       | 1.25 | 1.08 | 0 | 0 | 0 | not significant |
| 10747 | GO_PATTERN_RECOGNITION_RECEPTOR_SIGNALING_PATHWAY                | 1.25 | 1.05 | 0 | 0 | 0 | not significant |
| 10748 | SHEPARD_BMYB_MORPHOLINO_UP                                       | 1.25 | 1.05 | 0 | 0 | 0 | not significant |
| 10749 | GO_RESPONSE_TO_TOPOLOGICALLY_INCORRECT_PROTEIN                   | 1.25 | 1.01 | 0 | 0 | 0 | not significant |
| 10750 | CHR1Q21                                                          | 1.25 | 0.94 | 0 | 0 | 0 | not significant |
| 10751 | BROWN_MYELOID_CELL_DEVELOPMENT_UP                                | 1.25 | 0.91 | 0 | 0 | 0 | not significant |
| 10752 | GO_RESPONSE_TO_MECHANICAL_STIMULUS                               | 1.25 | 0.91 | 0 | 0 | 0 | not significant |
| 10753 | KOKKINAKIS_METHIONINE_DEPRIVATION_96HR_UP                        | 1.25 | 0.87 | 0 | 0 | 0 | not significant |
| 10754 | WAKASUGI_HAVE_ZNF143_BINDING_SITES                               | 1.25 | 0.86 | 0 | 0 | 0 | not significant |
| 10755 | GO_HYDROLASE_ACTIVITY_ACTING_ON_CARBON_NITROGEN_BUT_NOT_PEPTIDE  | 1.25 | 0.83 | 0 | 0 | 0 | not significant |
| 10756 | GO_POSITIVE_REGULATION_OF_RESPONSE_TO_ENDOPLASMIC_RETICULUM_STRE | 1.25 | 0.81 | 0 | 0 | 0 | not significant |
| 10757 | GO_REGULATION_OF_LIPASE_ACTIVITY                                 | 1.25 | 0.8  | 0 | 0 | 0 | not significant |
| 10758 | WESTON_VEGFA_TARGETS                                             | 1.25 | 0.8  | 0 | 0 | 0 | not significant |
| 10759 | BURTON_ADIPOGENESIS_PEAK_AT_16HR                                 | 1.25 | 0.79 | 0 | 0 | 0 | not significant |
| 10760 | DELPUECH_FOXO3_TARGETS_UP                                        | 1.25 | 0.78 | 0 | 0 | 0 | not significant |
| 10761 | GO_MACROPHAGE_MIGRATION                                          | 1.25 | 0.78 | 0 | 0 | 0 | not significant |
| 10762 | GO_FATTY_ACYL_COA_BIOSYNTHETIC_PROCESS                           | 1.25 | 0.76 | 0 | 0 | 0 | not significant |
| 10763 | KEGG_SPHINGOLIPID_METABOLISM                                     | 1.25 | 0.76 | 0 | 0 | 0 | not significant |
| 10764 | REACTOME_RECOGNITION_OF_DNA_DAMAGE_BY_PCNA_CONTAINING_REPLICATIO | 1.25 | 0.76 | 0 | 0 | 0 | not significant |
| 10765 | LEE_AGING_MUSCLE_DN                                              | 1.25 | 0.75 | 0 | 0 | 0 | not significant |
| 10766 | VALK_AML_CLUSTER_2                                               | 1.25 | 0.75 | 0 | 0 | 0 | not significant |
| 10767 | GO_CHOLESTEROL_STORAGE                                           | 1.25 | 0.74 | 0 | 0 | 0 | not significant |
| 10768 | GO_HISTONE_H3_DEACETYLATION                                      | 1.25 | 0.74 | 0 | 0 | 0 | not significant |
| 10769 | GO_POSITIVE_REGULATION_OF_OSTEOBLAST_DIFFERENTIATION             | 1.25 | 0.74 | 0 | 0 | 0 | not significant |
| 10770 | GO_ANION_HOMEOSTASIS                                             | 1.25 | 0.73 | 0 | 0 | 0 | not significant |
| 10771 | REACTOME_CALNEXIN_CALRETICULIN_CYCLE                             | 1.25 | 0.73 | 0 | 0 | 0 | not significant |
| 10772 | GO_ACETYL_COA_METABOLIC_PROCESS                                  | 1.25 | 0.71 | 0 | 0 | 0 | not significant |
| 10773 | ZEMBUTSU_SENSITIVITY_TO_VINCISTINE                               | 1.25 | 0.7  | 0 | 0 | 0 | not significant |
| 10774 | GO_DESMOSOME                                                     | 1.25 | 0.69 | 0 | 0 | 0 | not significant |
| 10775 | GO_DETECTION_OF_VIRUS                                            | 1.25 | 0.69 | 0 | 0 | 0 | not significant |
| 10776 | GO_NEGATIVE_REGULATION_OF_LIPID_TRANSPORT                        | 1.25 | 0.69 | 0 | 0 | 0 | not significant |
| 10777 | REACTOME_COLLAGEN_DEGRADATION                                    | 1.25 | 0.69 | 0 | 0 | 0 | not significant |
| 10778 | GO_MAMMARY_GLAND_EPITHELIAL_CELL_DIFFERENTIATION                 | 1.25 | 0.68 | 0 | 0 | 0 | not significant |
| 10779 | GO_POSITIVE_REGULATION_OF_NATURAL_KILLER_CELL_PROLIFERATION      | 1.25 | 0.68 | 0 | 0 | 0 | not significant |

|       |                                                                   |      |      |   |   |   |                 |
|-------|-------------------------------------------------------------------|------|------|---|---|---|-----------------|
| 10780 | BIOCARTA_BLYMPHOCYTE_PATHWAY                                      | 1.25 | 0.67 | 0 | 0 | 0 | not significant |
| 10781 | GO_MAP_KINASE_ACTIVITY                                            | 1.25 | 0.67 | 0 | 0 | 0 | not significant |
| 10782 | NAKAMURA_ADIPOGENESIS_EARLY_DN                                    | 1.25 | 0.67 | 0 | 0 | 0 | not significant |
| 10783 | BIOCARTA_BCELLSURVIVAL_PATHWAY                                    | 1.25 | 0.66 | 0 | 0 | 0 | not significant |
| 10784 | GO_NEGATIVE_REGULATION_OF_RESPIRATORY_BURST                       | 1.25 | 0.66 | 0 | 0 | 0 | not significant |
| 10785 | KEGG_GLYCOSAMINOGLYCAN_DEGRADATION                                | 1.25 | 0.66 | 0 | 0 | 0 | not significant |
| 10786 | SAKAI_TUMOR_INFILTRATING_MONOCYTES_UP                             | 1.25 | 0.66 | 0 | 0 | 0 | not significant |
| 10787 | GO_CALCIUM_ACTIVATED_CATION_CHANNEL_ACTIVITY                      | 1.25 | 0.65 | 0 | 0 | 0 | not significant |
| 10788 | GO_COLLAGEN_METABOLIC_PROCESS                                     | 1.25 | 0.65 | 0 | 0 | 0 | not significant |
| 10789 | GO_INNERVATION                                                    | 1.25 | 0.65 | 0 | 0 | 0 | not significant |
| 10790 | GO_PROTEIN_TYROSINE_KINASE_ACTIVATOR_ACTIVITY                     | 1.25 | 0.65 | 0 | 0 | 0 | not significant |
| 10791 | HOLLEMAN_DAUORUBICIN_B_ALL_DN                                     | 1.25 | 0.65 | 0 | 0 | 0 | not significant |
| 10792 | TSUNODA_CISPLATIN_RESISTANCE_UP                                   | 1.25 | 0.65 | 0 | 0 | 0 | not significant |
| 10793 | VALK_AML_CLUSTER_13                                               | 1.25 | 0.65 | 0 | 0 | 0 | not significant |
| 10794 | GO_REGULATION_OF_MODIFICATION_OF_SYNAPTIC_STRUCTURE               | 1.25 | 0.64 | 0 | 0 | 0 | not significant |
| 10795 | GO_RETINA_VASCULATURE_DEVELOPMENT_IN_CAMERA_TYPE_EYE              | 1.25 | 0.64 | 0 | 0 | 0 | not significant |
| 10796 | GO_ATG1_ULK1_KINASE_COMPLEX                                       | 1.25 | 0.63 | 0 | 0 | 0 | not significant |
| 10797 | GO_C_ACETYLTANSFERASE_ACTIVITY                                    | 1.25 | 0.63 | 0 | 0 | 0 | not significant |
| 10798 | MARTIN_NFKB_TARGETS_DN                                            | 1.25 | 0.63 | 0 | 0 | 0 | not significant |
| 10799 | GO_LEUCINE_BINDING                                                | 1.25 | 0.62 | 0 | 0 | 0 | not significant |
| 10800 | GO_GLYCOSIDE_CATABOLIC_PROCESS                                    | 1.25 | 0.61 | 0 | 0 | 0 | not significant |
| 10801 | GO_CONVERGENT_EXTENSION_INVOLVED_IN_GASTRULATION                  | 1.25 | 0.59 | 0 | 0 | 0 | not significant |
| 10802 | GO_POSITIVE_REGULATION_OF_INTRACELLULAR_SIGNAL_TRANSDUCTION       | 1.26 | 1.8  | 0 | 0 | 0 | not significant |
| 10803 | GO_CELLULAR_RESPONSE_TO_ORGANIC_CYCLIC_COMPOUND                   | 1.26 | 1.46 | 0 | 0 | 0 | not significant |
| 10804 | REACTOME_NEUTROPHIL_DEGRANULATION                                 | 1.26 | 1.43 | 0 | 0 | 0 | not significant |
| 10805 | GO_MYELOID_LEUKOCYTE_MEDIATED_IMMUNITY                            | 1.26 | 1.41 | 0 | 0 | 0 | not significant |
| 10806 | GO_PROXIMAL_PROMOTER_SEQUENCE_SPECIFIC_DNA_BINDING                | 1.26 | 1.28 | 0 | 0 | 0 | not significant |
| 10807 | GO_RESPONSE_TO_LIGHT_STIMULUS                                     | 1.26 | 1.06 | 0 | 0 | 0 | not significant |
| 10808 | GO_FATTY_ACID_CATABOLIC_PROCESS                                   | 1.26 | 0.97 | 0 | 0 | 0 | not significant |
| 10809 | GO_DRUG_TRANSPORT                                                 | 1.26 | 0.95 | 0 | 0 | 0 | not significant |
| 10810 | GO_TERTIARY GRANULE                                               | 1.26 | 0.94 | 0 | 0 | 0 | not significant |
| 10811 | KEGG_T_CELL_RECEPTOR_SIGNALING_PATHWAY                            | 1.26 | 0.94 | 0 | 0 | 0 | not significant |
| 10812 | LAIHO_COLORECTAL_CANCER_SERRATED_DN                               | 1.26 | 0.93 | 0 | 0 | 0 | not significant |
| 10813 | REACTOME_GLYCEROPHOSPHOLIPID_BIOSYNTHESIS                         | 1.26 | 0.93 | 0 | 0 | 0 | not significant |
| 10814 | GO_RECYCLING_ENDOSOME_MEMBRANE                                    | 1.26 | 0.9  | 0 | 0 | 0 | not significant |
| 10815 | PID_CD8_TCR_DOWNSTREAM_PATHWAY                                    | 1.26 | 0.9  | 0 | 0 | 0 | not significant |
| 10816 | KEGG_P53_SIGNALING_PATHWAY                                        | 1.26 | 0.87 | 0 | 0 | 0 | not significant |
| 10817 | MIKKELSEN_ES_LCP_WITH_H3K4ME3                                     | 1.26 | 0.87 | 0 | 0 | 0 | not significant |
| 10818 | GO_CARBOHYDRATE_DERIVATIVE_TRANSMEMBRANE_TRANSPORTER_ACTIVITY     | 1.26 | 0.85 | 0 | 0 | 0 | not significant |
| 10819 | PRAMOONJAGO_SOX4_TARGETS_UP                                       | 1.26 | 0.85 | 0 | 0 | 0 | not significant |
| 10820 | HOOL_ST7_TARGETS_DN                                               | 1.26 | 0.84 | 0 | 0 | 0 | not significant |
| 10821 | REACTOME_STIMULI_SENSING_CHANNELS                                 | 1.26 | 0.84 | 0 | 0 | 0 | not significant |
| 10822 | REACTOME_VISUAL_PHOTOTRANSDUCTION                                 | 1.26 | 0.83 | 0 | 0 | 0 | not significant |
| 10823 | GO_NEGATIVE_REGULATION_OF_BLOOD_VESSEL_DIAMETER                   | 1.26 | 0.82 | 0 | 0 | 0 | not significant |
| 10824 | HOFFMANN_PRE_BI_TO_LARGE_PRE_BII_LYMPHOCYTE_DN                    | 1.26 | 0.82 | 0 | 0 | 0 | not significant |
| 10825 | GO_SMAD_PROTEIN_SIGNAL_TRANSDUCTION                               | 1.26 | 0.81 | 0 | 0 | 0 | not significant |
| 10826 | MOHANKUMAR_HOXA1_TARGETS_DN                                       | 1.26 | 0.81 | 0 | 0 | 0 | not significant |
| 10827 | BCAT_BILD_ET_AL_UP                                                | 1.26 | 0.8  | 0 | 0 | 0 | not significant |
| 10828 | PID_AVB3_OPN_PATHWAY                                              | 1.26 | 0.8  | 0 | 0 | 0 | not significant |
| 10829 | GO_PHOSPHOLIPID_CATABOLIC_PROCESS                                 | 1.26 | 0.77 | 0 | 0 | 0 | not significant |
| 10830 | GO_REGULATION_OF_TORC1_SIGNALING                                  | 1.26 | 0.77 | 0 | 0 | 0 | not significant |
| 10831 | GO_PPTIDYL_ASPARAGINE_MODIFICATION                                | 1.26 | 0.75 | 0 | 0 | 0 | not significant |
| 10832 | GO_DNA_DAMAGE_RESPONSE_SIGNAL_TRANSDUCTION_RESULTING_IN_TRANSCRI  | 1.26 | 0.74 | 0 | 0 | 0 | not significant |
| 10833 | GO_MESODERMAL_CELL_DIFFERENTIATION                                | 1.26 | 0.73 | 0 | 0 | 0 | not significant |
| 10834 | GO_REGULATION_OF_PROTEIN_EXIT_FROM_ENDOPLASMIC_RETICULUM          | 1.26 | 0.73 | 0 | 0 | 0 | not significant |
| 10835 | JOHANSSON_GLIOMAGENESIS_BY_PDGF_DN                                | 1.26 | 0.73 | 0 | 0 | 0 | not significant |
| 10836 | GO_POSITIVE_REGULATION_OF_INTERLEUKIN_12_PRODUCTION               | 1.26 | 0.72 | 0 | 0 | 0 | not significant |
| 10837 | REACTOME_BASIGIN_INTERACTIONS                                     | 1.26 | 0.72 | 0 | 0 | 0 | not significant |
| 10838 | GO_CARBOXYPEPTIDASE_ACTIVITY                                      | 1.26 | 0.71 | 0 | 0 | 0 | not significant |
| 10839 | GO_REGULATION_OF_CAMP_DEPENDENT_PROTEIN_KINASE_ACTIVITY           | 1.26 | 0.71 | 0 | 0 | 0 | not significant |
| 10840 | GO_REGULATION_OF_SYSTEMIC_ARTERIAL_BLOOD_PRESSURE_BY_HORMONE      | 1.26 | 0.71 | 0 | 0 | 0 | not significant |
| 10841 | GO_NEGATIVE_REGULATION_OF_CARDIAC_MUSCLE_TISSUE_GROWTH            | 1.26 | 0.7  | 0 | 0 | 0 | not significant |
| 10842 | GO_NEGATIVE_REGULATION_OF_MYTUBE_DIFFERENTIATION                  | 1.26 | 0.7  | 0 | 0 | 0 | not significant |
| 10843 | GO_XENOPHAGY                                                      | 1.26 | 0.7  | 0 | 0 | 0 | not significant |
| 10844 | GO_ESTABLISHMENT_OF_ENDOTHELIAL_INTESTINAL_BARRIER                | 1.26 | 0.69 | 0 | 0 | 0 | not significant |
| 10845 | GO_T_HELPER_1_CELL_DIFFERENTIATION                                | 1.26 | 0.69 | 0 | 0 | 0 | not significant |
| 10846 | REACTOME_LYSOSPHINGOLIPID_AND_LPA_RECEPTORS                       | 1.26 | 0.69 | 0 | 0 | 0 | not significant |
| 10847 | GO_CLATHRIN_SCULPTED_GAMMA_AMINOBUTYRIC_ACID_TRANSPORT_VESICLE_M  | 1.26 | 0.68 | 0 | 0 | 0 | not significant |
| 10848 | GO_POSITIVE_REGULATION_OF_DNA_DEPENDENT_DNA_REPLICATION           | 1.26 | 0.68 | 0 | 0 | 0 | not significant |
| 10849 | GO_PRE_MRNA_3_SPLICE_SITE_BINDING                                 | 1.26 | 0.68 | 0 | 0 | 0 | not significant |
| 10850 | GO_REGULATION_OF_CELL_FATE_COMMITMENT                             | 1.26 | 0.68 | 0 | 0 | 0 | not significant |
| 10851 | GO_REGULATION_OF_FC_RECEPTOR_MEDIATED_STIMULATORY_SIGNALING_PAT-  | 1.26 | 0.68 | 0 | 0 | 0 | not significant |
| 10852 | GO_RESPIRATORY_BURST_INVOLVED_IN_INFLAMMATORY_RESPONSE            | 1.26 | 0.68 | 0 | 0 | 0 | not significant |
| 10853 | LE_NEURONAL_DIFFERENTIATION_UP                                    | 1.26 | 0.68 | 0 | 0 | 0 | not significant |
| 10854 | GO_ARP2_3_COMPLEX_BINDING                                         | 1.26 | 0.67 | 0 | 0 | 0 | not significant |
| 10855 | GO_DISTAL_TUBULE_DEVELOPMENT                                      | 1.26 | 0.67 | 0 | 0 | 0 | not significant |
| 10856 | HOLLEMAN_DAUORUBICIN_B_ALL_UP                                     | 1.26 | 0.67 | 0 | 0 | 0 | not significant |
| 10857 | GO_HEPARAN_SULFATE_PROTEOGLYCAN_BIOSYNTHETIC_PROCESS_POLYSACCH    | 1.26 | 0.66 | 0 | 0 | 0 | not significant |
| 10858 | GO_NEGATIVE_REGULATION_OF_ALPHA_BETA_T_CELL_PROLIFERATION         | 1.26 | 0.65 | 0 | 0 | 0 | not significant |
| 10859 | GO_REGULATION_OF_POSTSYNAPTIC_MEMBRANE_ORGANIZATION               | 1.26 | 0.65 | 0 | 0 | 0 | not significant |
| 10860 | GO_TRANSEPITHELIAL_TRANSPORT                                      | 1.26 | 0.65 | 0 | 0 | 0 | not significant |
| 10861 | REACTOME_STATS_ACTIVATION                                         | 1.26 | 0.64 | 0 | 0 | 0 | not significant |
| 10862 | GO_BETA_GALACTOSIDASE_ACTIVITY                                    | 1.26 | 0.63 | 0 | 0 | 0 | not significant |
| 10863 | GO_HAUS_COMPLEX                                                   | 1.26 | 0.63 | 0 | 0 | 0 | not significant |
| 10864 | GO_POSITIVE_REGULATION_OF_COLLATERAL_SPROUTING                    | 1.26 | 0.61 | 0 | 0 | 0 | not significant |
| 10865 | GO_SECRETION                                                      | 1.27 | 2.66 | 0 | 0 | 0 | not significant |
| 10866 | GO_RESPONSE_TO_ORGANIC_CYCLIC_COMPOUND                            | 1.27 | 1.77 | 0 | 0 | 0 | not significant |
| 10867 | RODRIGUES_THYROID_CARCINOMA_ANAPLASTIC_DN                         | 1.27 | 1.5  | 0 | 0 | 0 | not significant |
| 10868 | GO_REGULATION_OF_SECRETION                                        | 1.27 | 1.47 | 0 | 0 | 0 | not significant |
| 10869 | OSMAN_BLADDER_CANCER_DN                                           | 1.27 | 1.43 | 0 | 0 | 0 | not significant |
| 10870 | GO_REGULATION_OF_CELL_ACTIVATION                                  | 1.27 | 1.42 | 0 | 0 | 0 | not significant |
| 10871 | CHARAFE_BREAST_CANCER_LUMINAL_VS_BASAL_DN                         | 1.27 | 1.32 | 0 | 0 | 0 | not significant |
| 10872 | FOSTER_TOLERANT_MACROPHAGE_DN                                     | 1.27 | 1.3  | 0 | 0 | 0 | not significant |
| 10873 | LI_INDUCED_T_TO_NATURAL_KILLER_UP                                 | 1.27 | 1.26 | 0 | 0 | 0 | not significant |
| 10874 | CAMP_UP.V1_UP                                                     | 1.27 | 1.23 | 0 | 0 | 0 | not significant |
| 10875 | FARMER_BREAST_CANCER_APOCRINE_VS_LUMINAL                          | 1.27 | 1.16 | 0 | 0 | 0 | not significant |
| 10876 | GO_POSITIVE_REGULATION_OF_HEMOPOIESIS                             | 1.27 | 1.06 | 0 | 0 | 0 | not significant |
| 10877 | CHAUHAN_RESPONSE_TO_METHOXYESTRADIOL_DN                           | 1.27 | 1.03 | 0 | 0 | 0 | not significant |
| 10878 | KYNG_DNA_DAMAGE_DN                                                | 1.27 | 1.03 | 0 | 0 | 0 | not significant |
| 10879 | CHR6P22                                                           | 1.27 | 1.02 | 0 | 0 | 0 | not significant |
| 10880 | GO_COTRANSLATIONAL_PROTEIN_TARGETING_TO_MEMBRANE                  | 1.27 | 1.02 | 0 | 0 | 0 | not significant |
| 10881 | GO_REGULATION_OF_EPITHELIAL_CELL_MIGRATION                        | 1.27 | 1.01 | 0 | 0 | 0 | not significant |
| 10882 | SENGUPTA_EBNA1_ANTICORRELATED                                     | 1.27 | 0.99 | 0 | 0 | 0 | not significant |
| 10883 | GARGALOVIC_RESPONSE_TO_OXIDIZED_PHOSPHOLIPIDS_TURQUOISE_UP        | 1.27 | 0.98 | 0 | 0 | 0 | not significant |
| 10884 | RAPA_EARLY_UP.V1_DN                                               | 1.27 | 0.98 | 0 | 0 | 0 | not significant |
| 10885 | DEF_IFN_ALPHA_RESPONSE_UP                                         | 1.27 | 0.96 | 0 | 0 | 0 | not significant |
| 10886 | GO_OXIDOREDUCTASE_ACTIVITY_ACTING_ON_PAIRRED_DONORS_WITH_INCORPOR | 1.27 | 0.96 | 0 | 0 | 0 | not significant |
| 10887 | HOEBEKE_LYMPHOID_STEM_CELL_DN                                     | 1.27 | 0.96 | 0 | 0 | 0 | not significant |
| 10888 | CAHOV_ASTROCYTIC                                                  | 1.27 | 0.93 | 0 | 0 | 0 | not significant |



|       |                                                                     |      |      |   |   |   |                 |
|-------|---------------------------------------------------------------------|------|------|---|---|---|-----------------|
| 10889 | CAHOY_OLIGODENDROCYTIC                                              | 1.27 | 0.91 | 0 | 0 | 0 | not significant |
| 10890 | GO_NUCLEAR_INNER_MEMBRANE                                           | 1.27 | 0.91 | 0 | 0 | 0 | not significant |
| 10891 | GO_ROUGH_ENDOPLASMIC_RETICULUM                                      | 1.27 | 0.91 | 0 | 0 | 0 | not significant |
| 10892 | GO_REGULATION_OF_CARBOHYDRATE_BIOSYNTHETIC_PROCESS                  | 1.27 | 0.9  | 0 | 0 | 0 | not significant |
| 10893 | CHR17Q11                                                            | 1.27 | 0.88 | 0 | 0 | 0 | not significant |
| 10894 | GO_COFACTOR_TRANSPORT                                               | 1.27 | 0.88 | 0 | 0 | 0 | not significant |
| 10895 | CTIP_DN.V1_DN                                                       | 1.27 | 0.87 | 0 | 0 | 0 | not significant |
| 10896 | NATSUME_RESPONSE_TO_INTERFERON_BETA_UP                              | 1.27 | 0.87 | 0 | 0 | 0 | not significant |
| 10897 | CADWELL_ATG16L1_TARGETS_UP                                          | 1.27 | 0.86 | 0 | 0 | 0 | not significant |
| 10898 | GO_DRUG_TRANSMEMBRANE_TRANSPORT                                     | 1.27 | 0.83 | 0 | 0 | 0 | not significant |
| 10899 | TAVOR_CEBPA_TARGETS_DN                                              | 1.27 | 0.83 | 0 | 0 | 0 | not significant |
| 10900 | GO_NATURAL_KILLER_CELL_MEDIATED_IMMUNITY                            | 1.27 | 0.82 | 0 | 0 | 0 | not significant |
| 10901 | GO_PH_REDUCTION                                                     | 1.27 | 0.82 | 0 | 0 | 0 | not significant |
| 10902 | GO_T_CELL_DIFFERENTIATION_IN_THYMUS                                 | 1.27 | 0.82 | 0 | 0 | 0 | not significant |
| 10903 | ABE_INNER_EAR                                                       | 1.27 | 0.81 | 0 | 0 | 0 | not significant |
| 10904 | BILANGES_RAPAMYCIN_SENSITIVE_GENES                                  | 1.27 | 0.81 | 0 | 0 | 0 | not significant |
| 10905 | SATO_SILENCED_EPIGENETICALLY_IN_PANCREATIC_CANCER                   | 1.27 | 0.79 | 0 | 0 | 0 | not significant |
| 10906 | BREDEMEYER_RAG_SIGNALING_VIA_ATM_NOT_VIA_NFKB_UP                    | 1.27 | 0.78 | 0 | 0 | 0 | not significant |
| 10907 | GO_SPERM_MOTILITY                                                   | 1.27 | 0.78 | 0 | 0 | 0 | not significant |
| 10908 | LOPES_METHYLATED_IN_COLON_CANCER_DN                                 | 1.27 | 0.78 | 0 | 0 | 0 | not significant |
| 10909 | BIOCARTA_TOLL_PATHWAY                                               | 1.27 | 0.77 | 0 | 0 | 0 | not significant |
| 10910 | GO_POSITIVE_REGULATION_OF_TRANSCRIPTION_FROM_RNA_POLYMERASE_II_PR   | 1.27 | 0.77 | 0 | 0 | 0 | not significant |
| 10911 | REACTOME_GLYCOSPHINGOLIPID_METABOLISM                               | 1.27 | 0.77 | 0 | 0 | 0 | not significant |
| 10912 | CHR15Q14                                                            | 1.27 | 0.76 | 0 | 0 | 0 | not significant |
| 10913 | SHAFFER_IRF4_MULTIPLE_MYELOMA_PROGRAM                               | 1.27 | 0.76 | 0 | 0 | 0 | not significant |
| 10914 | FONTAINE_THYROID_TUMOR_UNCERTAIN_MALIGNANCY_UP                      | 1.27 | 0.75 | 0 | 0 | 0 | not significant |
| 10915 | GO_DENDRITIC_CELL_DIFFERENTIATION                                   | 1.27 | 0.75 | 0 | 0 | 0 | not significant |
| 10916 | GO_REGULATION_OF_ANION_TRANSMEMBRANE_TRANSPORT                      | 1.27 | 0.75 | 0 | 0 | 0 | not significant |
| 10917 | GO_REGULATION_OF_MYOBLAST_FUSION                                    | 1.27 | 0.75 | 0 | 0 | 0 | not significant |
| 10918 | MANTOVANI_NFKB_TARGETS_DN                                           | 1.27 | 0.75 | 0 | 0 | 0 | not significant |
| 10919 | GO_AMYLOID_BETA_CLEARANCE                                           | 1.27 | 0.74 | 0 | 0 | 0 | not significant |
| 10920 | GO_NITRIC_OXIDE_MEDIATED_SIGNAL_TRANSDUCTION                        | 1.27 | 0.74 | 0 | 0 | 0 | not significant |
| 10921 | GO_THYMIC_T_CELL_SELECTION                                          | 1.27 | 0.74 | 0 | 0 | 0 | not significant |
| 10922 | GO_INTERLEUKIN_17_PRODUCTION                                        | 1.27 | 0.72 | 0 | 0 | 0 | not significant |
| 10923 | GO_INTESTINAL_ABSORPTION                                            | 1.27 | 0.72 | 0 | 0 | 0 | not significant |
| 10924 | GO_MITOTIC_G2_DNA_DAMAGE_CHECKPOINT                                 | 1.27 | 0.72 | 0 | 0 | 0 | not significant |
| 10925 | GO_MUSCLE_FILAMENT_SLIDING                                          | 1.27 | 0.72 | 0 | 0 | 0 | not significant |
| 10926 | GO_NUCLEAR_RECEPTOR_ACTIVITY                                        | 1.27 | 0.72 | 0 | 0 | 0 | not significant |
| 10927 | BIOCARTA_NOZ12_PATHWAY                                              | 1.27 | 0.71 | 0 | 0 | 0 | not significant |
| 10928 | GO_CELLULAR_KETONE_BODY_METABOLIC_PROCESS                           | 1.27 | 0.71 | 0 | 0 | 0 | not significant |
| 10929 | GO_INTERMEDIATE_FILAMENT_ORGANIZATION                               | 1.27 | 0.71 | 0 | 0 | 0 | not significant |
| 10930 | PID_HNF3B_PATHWAY                                                   | 1.27 | 0.71 | 0 | 0 | 0 | not significant |
| 10931 | REACTOME_N_GLYCAN_ANTENNAE_ELONGATION                               | 1.27 | 0.71 | 0 | 0 | 0 | not significant |
| 10932 | VANLOO_SP3_TARGETS_UP                                               | 1.27 | 0.71 | 0 | 0 | 0 | not significant |
| 10933 | ZERBINI_RESPONSE_TO_SULINDAC_UP                                     | 1.27 | 0.71 | 0 | 0 | 0 | not significant |
| 10934 | GO_NUCLEAR_MEMBRANE_PROTEIN_COMPLEX                                 | 1.27 | 0.7  | 0 | 0 | 0 | not significant |
| 10935 | GO_T_CELL_ACTIVATION_VIA_T_CELL_RECEPTOR_CONTACT_WITH_ANTIGEN_BOL   | 1.27 | 0.7  | 0 | 0 | 0 | not significant |
| 10936 | MONTERO_THYROID_CANCER_POOR_SURVIVAL_DN                             | 1.27 | 0.7  | 0 | 0 | 0 | not significant |
| 10937 | GO_DENSE_CORE_GRANULE                                               | 1.27 | 0.69 | 0 | 0 | 0 | not significant |
| 10938 | GO_GLUCURONOSYLTRANSFERASE_ACTIVITY                                 | 1.27 | 0.69 | 0 | 0 | 0 | not significant |
| 10939 | GO_GLUCOCORTICOID_METABOLIC_PROCESS                                 | 1.27 | 0.68 | 0 | 0 | 0 | not significant |
| 10940 | GO_INTERLEUKIN_6_BIOSYNTHETIC_PROCESS                               | 1.27 | 0.68 | 0 | 0 | 0 | not significant |
| 10941 | GO_SERINE_FAMILY_AMINO_ACID_CATABOLIC_PROCESS                       | 1.27 | 0.68 | 0 | 0 | 0 | not significant |
| 10942 | REACTOME_CHL1_INTERACTIONS                                          | 1.27 | 0.68 | 0 | 0 | 0 | not significant |
| 10943 | REACTOME_CLEC7A_INFLAMMASOME_PATHWAY                                | 1.27 | 0.66 | 0 | 0 | 0 | not significant |
| 10944 | GO_REGULATION_OF_STORE_OPERATED_CALCIIUM_CHANNEL_ACTIVITY           | 1.27 | 0.65 | 0 | 0 | 0 | not significant |
| 10945 | MATZUK_PREOVULATORY_FOLLICLE                                        | 1.27 | 0.65 | 0 | 0 | 0 | not significant |
| 10946 | GO_LOCOMOTION_INVOLVED_IN_LOCOMOTORY_BEHAVIOR                       | 1.27 | 0.64 | 0 | 0 | 0 | not significant |
| 10947 | GO_CYTOPLASMIC_VESICLE_PART                                         | 1.28 | 2.27 | 0 | 0 | 0 | not significant |
| 10948 | GO_RESPONSE_TO_OXYGEN_CONTAINING_COMPOUND                           | 1.28 | 2.27 | 0 | 0 | 0 | not significant |
| 10949 | GO_MYELOID_LEUKOCYTE_ACTIVATION                                     | 1.28 | 1.65 | 0 | 0 | 0 | not significant |
| 10950 | CHR19Q13                                                            | 1.28 | 1.62 | 0 | 0 | 0 | not significant |
| 10951 | GO_ENDOSOMAL_PART                                                   | 1.28 | 1.56 | 0 | 0 | 0 | not significant |
| 10952 | GINESTIER_BREAST_CANCER_ZNF217_AMPLIFIED_DN                         | 1.28 | 1.55 | 0 | 0 | 0 | not significant |
| 10953 | BLUM_RESPONSE_TO_SALIRASIB_UP                                       | 1.28 | 1.32 | 0 | 0 | 0 | not significant |
| 10954 | GO_POSITIVE_REGULATION_OF_CELL_ADHESION                             | 1.28 | 1.3  | 0 | 0 | 0 | not significant |
| 10955 | GO_MAINTENANCE_OF_LOCATION                                          | 1.28 | 1.23 | 0 | 0 | 0 | not significant |
| 10956 | HELLER_SILENCED_BY_METHYLATION_UP                                   | 1.28 | 1.23 | 0 | 0 | 0 | not significant |
| 10957 | SCHUETZ_BREAST_CANCER_DUCTAL_INVASIVE_UP                            | 1.28 | 1.15 | 0 | 0 | 0 | not significant |
| 10958 | ACEVEDO_LIVER_TUMOR_VS_NORMAL_ADJACENT_TISSUE_DN                    | 1.28 | 1.13 | 0 | 0 | 0 | not significant |
| 10959 | KARLSSON_TGFB1_TARGETS_DN                                           | 1.28 | 1.08 | 0 | 0 | 0 | not significant |
| 10960 | COULOUARN_TEMPORAL_TGFB1_SIGNATURE_DN                               | 1.28 | 1.06 | 0 | 0 | 0 | not significant |
| 10961 | CRX_DN.V1_UP                                                        | 1.28 | 1.02 | 0 | 0 | 0 | not significant |
| 10962 | GAUSSMANN_MLL_AF4_FUSION_TARGETS_G_UP                               | 1.28 | 1.02 | 0 | 0 | 0 | not significant |
| 10963 | GO_RESPONSE_TO_ORGANOPHOSPHORUS                                     | 1.28 | 1    | 0 | 0 | 0 | not significant |
| 10964 | GO_ENDOPLASMIC_RETICULUM_UNFOLDED_PROTEIN_RESPONSE                  | 1.28 | 0.97 | 0 | 0 | 0 | not significant |
| 10965 | GO_REGULATION_OF_MUSCLE_CELL_DIFFERENTIATION                        | 1.28 | 0.97 | 0 | 0 | 0 | not significant |
| 10966 | GO_POSITIVE_REGULATION_OF_STRESS_ACTIVATED_PROTEIN_KINASE_SIGNALING | 1.28 | 0.96 | 0 | 0 | 0 | not significant |
| 10967 | ADDYA_ERYTHROID_DIFFERENTIATION_BY_HEMIN                            | 1.28 | 0.94 | 0 | 0 | 0 | not significant |
| 10968 | VECCHI_GASTRIC_CANCER_ADVANCED_VS_EARLY_DN                          | 1.28 | 0.94 | 0 | 0 | 0 | not significant |
| 10969 | BOSCO_TH1_CYTOTOXIC_MODULE                                          | 1.28 | 0.93 | 0 | 0 | 0 | not significant |
| 10970 | GO_CELLULAR_CARBOHYDRATE_BIOSYNTHETIC_PROCESS                       | 1.28 | 0.93 | 0 | 0 | 0 | not significant |
| 10971 | GOZGIT_ESR1_TARGETS_UP                                              | 1.28 | 0.93 | 0 | 0 | 0 | not significant |
| 10972 | HINATA_NFKB_TARGETS_FIBROBLAST_UP                                   | 1.28 | 0.91 | 0 | 0 | 0 | not significant |
| 10973 | GO_ACTIVATING_TRANSCRIPTION_FACTOR_BINDING                          | 1.28 | 0.89 | 0 | 0 | 0 | not significant |
| 10974 | KEGG_BASE_EXCISION_REPAIR                                           | 1.28 | 0.87 | 0 | 0 | 0 | not significant |
| 10975 | MATZUK_MEIOTIC_AND_DNA_REPAIR                                       | 1.28 | 0.86 | 0 | 0 | 0 | not significant |
| 10976 | GARGALOVIC_RESPONSE_TO_OXIDIZED_PHOSPHOLIPIDS_BLACK_UP              | 1.28 | 0.85 | 0 | 0 | 0 | not significant |
| 10977 | GO_CAVEOLA                                                          | 1.28 | 0.85 | 0 | 0 | 0 | not significant |
| 10978 | WESTON_VEGFA_TARGETS_3HR                                            | 1.28 | 0.84 | 0 | 0 | 0 | not significant |
| 10979 | GO_CELLULAR_EXTRAVASATION                                           | 1.28 | 0.83 | 0 | 0 | 0 | not significant |
| 10980 | LEE_LIVER_CANCER_MYC_TGFA_DN                                        | 1.28 | 0.8  | 0 | 0 | 0 | not significant |
| 10981 | BIOCARTA_INSULIN_PATHWAY                                            | 1.28 | 0.79 | 0 | 0 | 0 | not significant |
| 10982 | GO_INTRINSIC_APOPTOTIC_SIGNALING_PATHWAY_IN_RESPONSE_TO_DNA_DAMAG   | 1.28 | 0.79 | 0 | 0 | 0 | not significant |
| 10983 | GO_PHENOL_CONTAINING_COMPOUND_BIOSYNTHETIC_PROCESS                  | 1.28 | 0.79 | 0 | 0 | 0 | not significant |
| 10984 | GO_PYRIDINE_CONTAINING_COMPOUND_METABOLIC_PROCESS                   | 1.28 | 0.79 | 0 | 0 | 0 | not significant |
| 10985 | GO_REGULATION_OF_NATURAL_KILLER_CELL_ACTIVATION                     | 1.28 | 0.78 | 0 | 0 | 0 | not significant |
| 10986 | GO_T_CELL_LINEAGE_COMMITMENT                                        | 1.28 | 0.78 | 0 | 0 | 0 | not significant |
| 10987 | CHR4Q28                                                             | 1.28 | 0.77 | 0 | 0 | 0 | not significant |
| 10988 | GO_NEGATIVE_REGULATION_OF_SYNAPTIC_TRANSMISSION                     | 1.28 | 0.77 | 0 | 0 | 0 | not significant |
| 10989 | GALE_APL_WITH_FLT3_MUTATED_DN                                       | 1.28 | 0.76 | 0 | 0 | 0 | not significant |
| 10990 | GO_CELL_CELL_ADHESION_MEDIATED_BY_CADHERIN                          | 1.28 | 0.76 | 0 | 0 | 0 | not significant |
| 10991 | PATTERSON_DOCETAXEL_RESISTANCE                                      | 1.28 | 0.76 | 0 | 0 | 0 | not significant |
| 10992 | REACTOME_SYNTHESIS_OF_VERY_LONG_CHAIN_FATTY_ACYL_COAS               | 1.28 | 0.76 | 0 | 0 | 0 | not significant |
| 10993 | GO_ENDONUCLEASE_ACTIVITY_ACTIVE_WITH_EITHER_RIBO_OR_DEOXYRIBONUCLI  | 1.28 | 0.75 | 0 | 0 | 0 | not significant |
| 10994 | GO_MONONUCLEAR_CELL_MIGRATION                                       | 1.28 | 0.75 | 0 | 0 | 0 | not significant |
| 10995 | GO_DNA_STRAND_ELONGATION_INVOLVED_IN_DNA_REPLICATION                | 1.28 | 0.74 | 0 | 0 | 0 | not significant |
| 10996 | GO_HORMONE_ACTIVITY                                                 | 1.28 | 0.74 | 0 | 0 | 0 | not significant |
| 10997 | GO_INTERLEUKIN_21_MEDIATED_SIGNALING_PATHWAY                        | 1.28 | 0.74 | 0 | 0 | 0 | not significant |

|       |                                                                   |      |      |   |   |   |                 |
|-------|-------------------------------------------------------------------|------|------|---|---|---|-----------------|
| 10998 | GO_LATERAL_MESODERM_DEVELOPMENT                                   | 1.28 | 0.74 | 0 | 0 | 0 | not significant |
| 10999 | GO_LONG_CHAIN_FATTY_ACYL_COA_BIOSYNTHETIC_PROCESS                 | 1.28 | 0.74 | 0 | 0 | 0 | not significant |
| 11000 | GO_REGULATION_OF_ACUTE_INFLAMMATORY_RESPONSE_TO_ANTIAGENIC_STIMUL | 1.28 | 0.74 | 0 | 0 | 0 | not significant |
| 11001 | OSADA_ASCL1_TARGETS_UP                                            | 1.28 | 0.74 | 0 | 0 | 0 | not significant |
| 11002 | GO_GATOR2_COMPLEX                                                 | 1.28 | 0.73 | 0 | 0 | 0 | not significant |
| 11003 | GO_KETONE_CATABOLIC_PROCESS                                       | 1.28 | 0.73 | 0 | 0 | 0 | not significant |
| 11004 | GO_PHOSPHATE_ION_TRANSMEMBRANE_TRANSPORTER_ACTIVITY               | 1.28 | 0.73 | 0 | 0 | 0 | not significant |
| 11005 | GO_PLACENTA_BLOOD_VESSEL_DEVELOPMENT                              | 1.28 | 0.73 | 0 | 0 | 0 | not significant |
| 11006 | KANG_FLUOROURACIL_RESISTANCE_DN                                   | 1.28 | 0.73 | 0 | 0 | 0 | not significant |
| 11007 | GO_DIAPHRAGM_DEVELOPMENT                                          | 1.28 | 0.72 | 0 | 0 | 0 | not significant |
| 11008 | BIOCARTA_IFNA_PATHWAY                                             | 1.28 | 0.71 | 0 | 0 | 0 | not significant |
| 11009 | GO_AMINO_ACID_BETAINE_BIOSYNTHETIC_PROCESS                        | 1.28 | 0.71 | 0 | 0 | 0 | not significant |
| 11010 | GO_CYTOSKELETAL_ANCHORING_AT_NUCLEAR_MEMBRANE                     | 1.28 | 0.71 | 0 | 0 | 0 | not significant |
| 11011 | GO_UTERUS_DEVELOPMENT                                             | 1.28 | 0.71 | 0 | 0 | 0 | not significant |
| 11012 | PID_INTEGRIN3_PATHWAY                                             | 1.28 | 0.71 | 0 | 0 | 0 | not significant |
| 11013 | REACTOME_NOTCH4_ACTIVATION_AND_TRANSMISSION_OF_SIGNAL_TO_THE_NUCI | 1.28 | 0.71 | 0 | 0 | 0 | not significant |
| 11014 | SHIN_B_CELL_LYMPHOMA_CLUSTER_1                                    | 1.28 | 0.71 | 0 | 0 | 0 | not significant |
| 11015 | GO_REGULATION_OF_HUMORAL_IMMUNE_RESPONSE_MEDIATED_BY_CIRCULATING  | 1.28 | 0.7  | 0 | 0 | 0 | not significant |
| 11016 | CROONQUIST_IL6_DEPRIVATION_UP                                     | 1.28 | 0.69 | 0 | 0 | 0 | not significant |
| 11017 | GO_KETONE_BODY_BIOSYNTHETIC_PROCESS                               | 1.28 | 0.69 | 0 | 0 | 0 | not significant |
| 11018 | GO_PPTIDYL_LYSINE_DEACETYLATION                                   | 1.28 | 0.69 | 0 | 0 | 0 | not significant |
| 11019 | GO_PROTEIN_C_LINKED_GLYCOSYLATION                                 | 1.28 | 0.69 | 0 | 0 | 0 | not significant |
| 11020 | GO_TOLL LIKE RECEPTOR_7_SIGNALING_PATHWAY                         | 1.28 | 0.69 | 0 | 0 | 0 | not significant |
| 11021 | PID_P38_GAMMA_DELTA_PATHWAY                                       | 1.28 | 0.69 | 0 | 0 | 0 | not significant |
| 11022 | WANG_LSD1_TARGETS_UP                                              | 1.28 | 0.69 | 0 | 0 | 0 | not significant |
| 11023 | GO_ANNEALING_ACTIVITY                                             | 1.28 | 0.68 | 0 | 0 | 0 | not significant |
| 11024 | GO_SIGNAL_PEPTIDASE_COMPLEX                                       | 1.28 | 0.68 | 0 | 0 | 0 | not significant |
| 11025 | HUMMERICH_MALIGNANT_SKIN_TUMOR_DN                                 | 1.28 | 0.68 | 0 | 0 | 0 | not significant |
| 11026 | GO_ENDOSOME                                                       | 1.29 | 2.36 | 0 | 0 | 0 | not significant |
| 11027 | GO_TRANSMEMBRANE_TRANSPORT                                        | 1.29 | 2.12 | 0 | 0 | 0 | not significant |
| 11028 | BRUINS_UVC_RESPONSE_VIA_TP53_GROUP_B                              | 1.29 | 1.51 | 0 | 0 | 0 | not significant |
| 11029 | RUTELLA_RESPONSE_TO_HGF_VS_CSF2RB_AND_IL4_UP                      | 1.29 | 1.49 | 0 | 0 | 0 | not significant |
| 11030 | GO_MONOCARBOXYLIC_ACID_METABOLIC_PROCESS                          | 1.29 | 1.43 | 0 | 0 | 0 | not significant |
| 11031 | HAN_SATB1_TARGETS_DN                                              | 1.29 | 1.38 | 0 | 0 | 0 | not significant |
| 11032 | GO_NEGATIVE_REGULATION_OF_GROWTH                                  | 1.29 | 1.18 | 0 | 0 | 0 | not significant |
| 11033 | GO_ORGANIC_ACID_TRANSPORT                                         | 1.29 | 1.18 | 0 | 0 | 0 | not significant |
| 11034 | PDGF_ERK_DN.V1_DN                                                 | 1.29 | 1.18 | 0 | 0 | 0 | not significant |
| 11035 | PANGAS_TUMOR_SUPPRESSION_BY_SMAD1_AND_SMAD5_DN                    | 1.29 | 1.15 | 0 | 0 | 0 | not significant |
| 11036 | GO_SPECIFIC_GRANULE                                               | 1.29 | 1.12 | 0 | 0 | 0 | not significant |
| 11037 | MANALO_HYPOXIA_UP                                                 | 1.29 | 1.11 | 0 | 0 | 0 | not significant |
| 11038 | GO_PRIMARY_ACTIVE_TRANSMEMBRANE_TRANSPORTER_ACTIVITY              | 1.29 | 1.08 | 0 | 0 | 0 | not significant |
| 11039 | REACTOME_HOMOLOGY_DIRECTED_REPAIR                                 | 1.29 | 1.08 | 0 | 0 | 0 | not significant |
| 11040 | GO_POTASSIUM_ION_TRANSPORT                                        | 1.29 | 1.05 | 0 | 0 | 0 | not significant |
| 11041 | GO_NEGATIVE_REGULATION_OF_CELL_CELL_ADHESION                      | 1.29 | 1.03 | 0 | 0 | 0 | not significant |
| 11042 | GAVIN_FOXP3_TARGETS_CLUSTER_T4                                    | 1.29 | 0.99 | 0 | 0 | 0 | not significant |
| 11043 | GO_UBIQUITIN_DEPENDENT_ERAD_PATHWAY                               | 1.29 | 0.97 | 0 | 0 | 0 | not significant |
| 11044 | KRAS.PROSTATE_UP.V1_UP                                            | 1.29 | 0.97 | 0 | 0 | 0 | not significant |
| 11045 | WNT_UP.V1_UP                                                      | 1.29 | 0.95 | 0 | 0 | 0 | not significant |
| 11046 | GO_REGULATION_OF_DNA_DEPENDENT_DNA_REPLICATION                    | 1.29 | 0.94 | 0 | 0 | 0 | not significant |
| 11047 | GO_REGULATION_OF_LIPID_TRANSPORT                                  | 1.29 | 0.94 | 0 | 0 | 0 | not significant |
| 11048 | GO_REGULATION_OF_ANION_TRANSPORT                                  | 1.29 | 0.92 | 0 | 0 | 0 | not significant |
| 11049 | NIKOLSKY_BREAST_CANCER_16Q24_AMPLICON                             | 1.29 | 0.92 | 0 | 0 | 0 | not significant |
| 11050 | YEGNASUBRAMANIAN_PROSTATE_CANCER                                  | 1.29 | 0.92 | 0 | 0 | 0 | not significant |
| 11051 | GO_CYTOPLASMIC_PATTERN_RECOGNITION_RECEPTOR_SIGNALING_PATHWAY     | 1.29 | 0.91 | 0 | 0 | 0 | not significant |
| 11052 | GO_INTRINSIC_COMPONENT_OF_GOLGI_MEMBRANE                          | 1.29 | 0.91 | 0 | 0 | 0 | not significant |
| 11053 | CHRXQ13                                                           | 1.29 | 0.9  | 0 | 0 | 0 | not significant |
| 11054 | DIRMEIER_LMP1_RESPONSE_LATE_UP                                    | 1.29 | 0.9  | 0 | 0 | 0 | not significant |
| 11055 | DOANE_BREAST_CANCER_CLASSES_UP                                    | 1.29 | 0.87 | 0 | 0 | 0 | not significant |
| 11056 | KEGG_NOD LIKE RECEPTOR_SIGNALING_PATHWAY                          | 1.29 | 0.87 | 0 | 0 | 0 | not significant |
| 11057 | PID_GMCSF_PATHWAY                                                 | 1.29 | 0.86 | 0 | 0 | 0 | not significant |
| 11058 | GO_BASEMENT_MEMBRANE                                              | 1.29 | 0.85 | 0 | 0 | 0 | not significant |
| 11059 | PID_P38_ALPHA_BETA_PATHWAY                                        | 1.29 | 0.85 | 0 | 0 | 0 | not significant |
| 11060 | GO_RHYTHMIC_BEHAVIOR                                              | 1.29 | 0.83 | 0 | 0 | 0 | not significant |
| 11061 | GO_REGULATION_OF_PROTEIN_OLIGOMERIZATION                          | 1.29 | 0.82 | 0 | 0 | 0 | not significant |
| 11062 | GO_REGULATION_OF_VASOCONSTRICTION                                 | 1.29 | 0.82 | 0 | 0 | 0 | not significant |
| 11063 | GO_ACID_AMINO_ACID_LIGASE_ACTIVITY                                | 1.29 | 0.81 | 0 | 0 | 0 | not significant |
| 11064 | KEGG_HOMOLOGOUS_RECOMBINATION                                     | 1.29 | 0.81 | 0 | 0 | 0 | not significant |
| 11065 | GO_VASCULAR_ENDOTHELIAL_CELL_PROLIFERATION                        | 1.29 | 0.8  | 0 | 0 | 0 | not significant |
| 11066 | REACTOME_THE_ACTIVATION_OF_ARYLSULFATASES                         | 1.29 | 0.8  | 0 | 0 | 0 | not significant |
| 11067 | GO_RESPIRATORY_BURST                                              | 1.29 | 0.79 | 0 | 0 | 0 | not significant |
| 11068 | WATANABE_ULCERATIVE_COLITIS_WITH_CANCER_DN                        | 1.29 | 0.79 | 0 | 0 | 0 | not significant |
| 11069 | GO_DEOXYRIBONUCLEOSIDE_MONOPHOSPHATE_BIOSYNTHETIC_PROCESS         | 1.29 | 0.78 | 0 | 0 | 0 | not significant |
| 11070 | GO_REGULATION_OF_ACUTE_INFLAMMATORY_RESPONSE                      | 1.29 | 0.78 | 0 | 0 | 0 | not significant |
| 11071 | KYNG_ENVIRONMENTAL_STRESS_RESPONSE_NOT_BY_UV_IN_OLD               | 1.29 | 0.78 | 0 | 0 | 0 | not significant |
| 11072 | GO_PROTON_TRANSPORTING_V_TYPE_ATPASE_VO_DOMAIN                    | 1.29 | 0.77 | 0 | 0 | 0 | not significant |
| 11073 | GO_TERMINAL_BOUTON                                                | 1.29 | 0.77 | 0 | 0 | 0 | not significant |
| 11074 | GO_WOUND_HEALING_INVOLVED_IN_INFLAMMATORY_RESPONSE                | 1.29 | 0.77 | 0 | 0 | 0 | not significant |
| 11075 | BIOCARTA_DC_PATHWAY                                               | 1.29 | 0.76 | 0 | 0 | 0 | not significant |
| 11076 | GO_NATURAL_KILLER_CELL_PROLIFERATION                              | 1.29 | 0.76 | 0 | 0 | 0 | not significant |
| 11077 | GO_REGULATION_OF_INFLAMMATORY_RESPONSE_TO_ANTIAGENIC_STIMULUS     | 1.29 | 0.76 | 0 | 0 | 0 | not significant |
| 11078 | GO_REGULATION_OF_SYNCYTIUM_FORMATION_BY_PLASMA_MEMBRANE_FUSION    | 1.29 | 0.76 | 0 | 0 | 0 | not significant |
| 11079 | TRAYNOR_RETT_SYNDROM_DN                                           | 1.29 | 0.76 | 0 | 0 | 0 | not significant |
| 11080 | BIOCARTA_CCR5_PATHWAY                                             | 1.29 | 0.75 | 0 | 0 | 0 | not significant |
| 11081 | GO_EPITHELIAL_CILIUM_MOVEMENT                                     | 1.29 | 0.75 | 0 | 0 | 0 | not significant |
| 11082 | GO_POSITIVE_REGULATION_OF_PROTEIN_OLIGOMERIZATION                 | 1.29 | 0.75 | 0 | 0 | 0 | not significant |
| 11083 | LA_MEN1_TARGETS                                                   | 1.29 | 0.75 | 0 | 0 | 0 | not significant |
| 11084 | GO_NEGATIVE_REGULATION_OF_LYMPHOCYTE_MIGRATION                    | 1.29 | 0.74 | 0 | 0 | 0 | not significant |
| 11085 | GO_REGULATION_OF_RESPIRATORY_BURST                                | 1.29 | 0.74 | 0 | 0 | 0 | not significant |
| 11086 | GO_AROMATIC_AMINO_ACID_TRANSPORT                                  | 1.29 | 0.72 | 0 | 0 | 0 | not significant |
| 11087 | GO_CARBOHYDRATE_CATION_SYMPORTER_ACTIVITY                         | 1.29 | 0.72 | 0 | 0 | 0 | not significant |
| 11088 | GO_NEGATIVE_REGULATION_OF_TISSUE_REMODELING                       | 1.29 | 0.72 | 0 | 0 | 0 | not significant |
| 11089 | KEGG_GLYCOSPHINGOLIPID_BIOSYNTHESIS_GLOBO_SERIES                  | 1.29 | 0.72 | 0 | 0 | 0 | not significant |
| 11090 | GO_DNA_REPAIR_COMPLEX_ASSEMBLY                                    | 1.29 | 0.71 | 0 | 0 | 0 | not significant |
| 11091 | GO_MUTALPHA_COMPLEX_BINDING                                       | 1.29 | 0.71 | 0 | 0 | 0 | not significant |
| 11092 | REACTOME_REACTIONS_SPECIFIC_TO_THE_COMPLEX_N_GLYCAN_SYNTHESIS_PA  | 1.29 | 0.71 | 0 | 0 | 0 | not significant |
| 11093 | GO_INTERLEUKIN_5_SECRETION                                        | 1.29 | 0.7  | 0 | 0 | 0 | not significant |
| 11094 | WANG_RESPONSE_TO_PACLITAXEL_VIA_MAPK8_UP                          | 1.29 | 0.7  | 0 | 0 | 0 | not significant |
| 11095 | GO_INSULIN LIKE GROWTH_FACTOR_BINDING                             | 1.29 | 0.69 | 0 | 0 | 0 | not significant |
| 11096 | GO_RESPONSE_TO_DRUG                                               | 1.30 | 2.05 | 0 | 0 | 0 | not significant |
| 11097 | GO_VESICLE_MEMBRANE                                               | 1.30 | 1.99 | 0 | 0 | 0 | not significant |
| 11098 | ENK_UV_RESPONSE_KERATINOCYTE_UP                                   | 1.30 | 1.82 | 0 | 0 | 0 | not significant |
| 11099 | GO_TUBE_MORPHOGENESIS                                             | 1.30 | 1.73 | 0 | 0 | 0 | not significant |
| 11100 | GO_CATION_TRANSMEMBRANE_TRANSPORT                                 | 1.30 | 1.7  | 0 | 0 | 0 | not significant |
| 11101 | ACEVEDO_LIVER_CANCER_DN                                           | 1.30 | 1.55 | 0 | 0 | 0 | not significant |
| 11102 | SMID_BREAST_CANCER_BASAL_DN                                       | 1.30 | 1.49 | 0 | 0 | 0 | not significant |
| 11103 | NFE2L2.V2                                                         | 1.30 | 1.35 | 0 | 0 | 0 | not significant |
| 11104 | GO_LIPID_CATABOLIC_PROCESS                                        | 1.30 | 1.34 | 0 | 0 | 0 | not significant |
| 11105 | GO_CELLULAR_RESPONSE_TO_DRUG                                      | 1.30 | 1.33 | 0 | 0 | 0 | not significant |
| 11106 | GO_CELLULAR_RESPONSE_TO_STEROID_HORMONE_STIMULUS                  | 1.30 | 1.29 | 0 | 0 | 0 | not significant |

|       |                                                                   |      |      |   |   |   |                 |
|-------|-------------------------------------------------------------------|------|------|---|---|---|-----------------|
| 11107 | OSWALD_HEMATOPOIETIC_STEM_CELL_IN_COLLAGEN_GEL_UP                 | 1.30 | 1.26 | 0 | 0 | 0 | not significant |
| 11108 | SHEDDEN_LUNG_CANCER_GOOD_SURVIVAL_A12                             | 1.30 | 1.22 | 0 | 0 | 0 | not significant |
| 11109 | BENPORATH_PRC2_TARGETS                                            | 1.30 | 1.21 | 0 | 0 | 0 | not significant |
| 11110 | GO_NEGATIVE_REGULATION_OF_ESTABLISHMENT_OF_PROTEIN_LOCALIZATION   | 1.30 | 1.21 | 0 | 0 | 0 | not significant |
| 11111 | GO_FATTY_ACID_METABOLIC_PROCESS                                   | 1.30 | 1.18 | 0 | 0 | 0 | not significant |
| 11112 | PRC2_EED_UP.V1_DN                                                 | 1.30 | 1.18 | 0 | 0 | 0 | not significant |
| 11113 | SNF5_DNV1_UP                                                      | 1.30 | 1.17 | 0 | 0 | 0 | not significant |
| 11114 | GO_CARBOHYDRATE_DERIVATIVE_CATABOLIC_PROCESS                      | 1.30 | 1.11 | 0 | 0 | 0 | not significant |
| 11115 | ATF2_UP.V1_UP                                                     | 1.30 | 1.09 | 0 | 0 | 0 | not significant |
| 11116 | CHR5Q35                                                           | 1.30 | 1.09 | 0 | 0 | 0 | not significant |
| 11117 | GO_LIPID_TRANSPORTER_ACTIVITY                                     | 1.30 | 1.02 | 0 | 0 | 0 | not significant |
| 11118 | CHEN_LVAD_SUPPORT_OF_FAILING_HEART_UP                             | 1.30 | 1.01 | 0 | 0 | 0 | not significant |
| 11119 | KEGG_RIBOSOME                                                     | 1.30 | 1.01 | 0 | 0 | 0 | not significant |
| 11120 | GO_GOLGI_ASSOCIATED_VESICLE_MEMBRANE                              | 1.30 | 1    | 0 | 0 | 0 | not significant |
| 11121 | KEGG_SMALL_CELL_LUNG_CANCER                                       | 1.30 | 0.97 | 0 | 0 | 0 | not significant |
| 11122 | PID_E2F_PATHWAY                                                   | 1.30 | 0.96 | 0 | 0 | 0 | not significant |
| 11123 | BAELDE_DIABETIC_NEPHROPATHY_UP                                    | 1.30 | 0.93 | 0 | 0 | 0 | not significant |
| 11124 | NABA_ECM_REGULATORS                                               | 1.30 | 0.92 | 0 | 0 | 0 | not significant |
| 11125 | GO_MACROPHAGE_ACTIVATION                                          | 1.30 | 0.91 | 0 | 0 | 0 | not significant |
| 11126 | KEGG_DILATED_CARDIOMYOPATHY                                       | 1.30 | 0.91 | 0 | 0 | 0 | not significant |
| 11127 | PID_RHOA_PATHWAY                                                  | 1.30 | 0.9  | 0 | 0 | 0 | not significant |
| 11128 | GO_GLIAL_CELL_PROLIFERATION                                       | 1.30 | 0.89 | 0 | 0 | 0 | not significant |
| 11129 | GO_RNA_POLYMERASE_II_CORE_PROMOTER_SEQUENCE_SPECIFIC_DNA_BINDING  | 1.30 | 0.87 | 0 | 0 | 0 | not significant |
| 11130 | GO_PYRIDINE_CONTAINING_COMPOUND_BIOSYNTHETIC_PROCESS              | 1.30 | 0.85 | 0 | 0 | 0 | not significant |
| 11131 | CHR7Q21                                                           | 1.30 | 0.83 | 0 | 0 | 0 | not significant |
| 11132 | GO_INTERLEUKIN_4_MEDIATED_SIGNALING_PATHWAY                       | 1.30 | 0.83 | 0 | 0 | 0 | not significant |
| 11133 | GO_LENS_FIBER_CELL_DIFFERENTIATION                                | 1.30 | 0.83 | 0 | 0 | 0 | not significant |
| 11134 | PID_TCR_RAS_PATHWAY                                               | 1.30 | 0.83 | 0 | 0 | 0 | not significant |
| 11135 | GO_CAP_INDEPENDENT_TRANSLATIONAL_INITIATION                       | 1.30 | 0.82 | 0 | 0 | 0 | not significant |
| 11136 | GO_REGULATION_OF_GLYCOPROTEIN_BIOSYNTHETIC_PROCESS                | 1.30 | 0.81 | 0 | 0 | 0 | not significant |
| 11137 | REACTOME_TRANSPORT_OF_NUCLEOSIDES_AND_FREE_PURINE_AND_PYRIMIDINE  | 1.30 | 0.81 | 0 | 0 | 0 | not significant |
| 11138 | FRIDMAN_IMMORTALIZATION_DN                                        | 1.30 | 0.8  | 0 | 0 | 0 | not significant |
| 11139 | GO_NEGATIVE_REGULATION_OF_ANION_TRANSPORT                         | 1.30 | 0.8  | 0 | 0 | 0 | not significant |
| 11140 | GO_NEGATIVE_REGULATION_OF_FATTY_ACID_BIOSYNTHETIC_PROCESS         | 1.30 | 0.8  | 0 | 0 | 0 | not significant |
| 11141 | MIKKELSEN_MEF_ICP_WITH_H3K4ME3_AND_H3K27ME3                       | 1.30 | 0.8  | 0 | 0 | 0 | not significant |
| 11142 | REACTOME_DOPAMINE_NEUROTRANSMITTER_RELEASE_CYCLE                  | 1.30 | 0.8  | 0 | 0 | 0 | not significant |
| 11143 | GO_BILE_ACID_BIOSYNTHETIC_PROCESS                                 | 1.30 | 0.79 | 0 | 0 | 0 | not significant |
| 11144 | GO_NEGATIVE_REGULATION_OF_MACROPHAGE_MIGRATION                    | 1.30 | 0.79 | 0 | 0 | 0 | not significant |
| 11145 | DORSEY_GAB2_TARGETS                                               | 1.30 | 0.78 | 0 | 0 | 0 | not significant |
| 11146 | GO_ACTIN_FILAMENT_REORGANIZATION                                  | 1.30 | 0.78 | 0 | 0 | 0 | not significant |
| 11147 | GO_NADPLUS_ADP_RIBOSYLTRANSFERASE_ACTIVITY                        | 1.30 | 0.78 | 0 | 0 | 0 | not significant |
| 11148 | REACTOME_CELL_CELL_JUNCTION_ORGANIZATION                          | 1.30 | 0.78 | 0 | 0 | 0 | not significant |
| 11149 | BIOCARTA_LAIR_PATHWAY                                             | 1.30 | 0.77 | 0 | 0 | 0 | not significant |
| 11150 | GO_CYSTEINE_METABOLIC_PROCESS                                     | 1.30 | 0.77 | 0 | 0 | 0 | not significant |
| 11151 | GO_DIHYDROLIPOYL_DEHYDROGENASE_COMPLEX                            | 1.30 | 0.77 | 0 | 0 | 0 | not significant |
| 11152 | GO_MACROPHAGE_ACTIVATION_INVOLVED_IN_IMMUNE_RESPONSE              | 1.30 | 0.77 | 0 | 0 | 0 | not significant |
| 11153 | GO_RECEPTOR_INHIBITOR_ACTIVITY                                    | 1.30 | 0.77 | 0 | 0 | 0 | not significant |
| 11154 | GO_REGULATION_OF_SYSTEMIC_ARTERIAL_BLOOD_PRESSURE_BY_RENIN_ANGIO  | 1.30 | 0.77 | 0 | 0 | 0 | not significant |
| 11155 | GO_CRANIAL_SUTURE_MORPHOGENESIS                                   | 1.30 | 0.76 | 0 | 0 | 0 | not significant |
| 11156 | GO_POSITIVE_REGULATION_OF_FC_RECEPTOR_MEDIATED_STIMULATORY_SIGNAL | 1.30 | 0.76 | 0 | 0 | 0 | not significant |
| 11157 | GO_RESPONSE_TO_INTERFERON_ALPHA                                   | 1.30 | 0.76 | 0 | 0 | 0 | not significant |
| 11158 | KREPPPEL_CD99_TARGETS_DN                                          | 1.30 | 0.76 | 0 | 0 | 0 | not significant |
| 11159 | REACTOME_PLATELET_ADHESION_TO_EXPOSED_COLLAGEN                    | 1.30 | 0.76 | 0 | 0 | 0 | not significant |
| 11160 | VERRECCHIA_RESPONSE_TO_TGFB1_C2                                   | 1.30 | 0.76 | 0 | 0 | 0 | not significant |
| 11161 | ABE_VEGFA_TARGETS                                                 | 1.30 | 0.75 | 0 | 0 | 0 | not significant |
| 11162 | REACTOME_BIOSYNTHESIS_OF_SPECIALIZED_PRORESOLVING_MEDIATORS_SPMS  | 1.30 | 0.74 | 0 | 0 | 0 | not significant |
| 11163 | REACTOME_PYRIMIDINE_CATABOLISM                                    | 1.30 | 0.74 | 0 | 0 | 0 | not significant |
| 11164 | SCIAN_INVERSED_TARGETS_OF_TP53_AND_TP73_UP                        | 1.30 | 0.74 | 0 | 0 | 0 | not significant |
| 11165 | BOYALILT_LIVER_CANCER_SUBCLASS_G56_UP                             | 1.30 | 0.73 | 0 | 0 | 0 | not significant |
| 11166 | CHEN_PDGF_TARGETS                                                 | 1.30 | 0.73 | 0 | 0 | 0 | not significant |
| 11167 | GO_FOLIC_ACID_BINDING                                             | 1.30 | 0.73 | 0 | 0 | 0 | not significant |
| 11168 | GO_INSULIN_LIKE_GROWTH_FACTOR_I_BINDING                           | 1.30 | 0.73 | 0 | 0 | 0 | not significant |
| 11169 | REACTOME_SEROTONIN_NEUROTRANSMITTER_RELEASE_CYCLE                 | 1.30 | 0.73 | 0 | 0 | 0 | not significant |
| 11170 | GO_REGULATION_OF_FC_GAMMA_RECEPTOR_SIGNALING_PATHWAY_INVOLVED_IN  | 1.30 | 0.72 | 0 | 0 | 0 | not significant |
| 11171 | MAHADEVAN_IMATINIB_RESISTANCE_DN                                  | 1.30 | 0.72 | 0 | 0 | 0 | not significant |
| 11172 | OUELLET_CULTURED_OVARIAN_CANCER_INVASIVE_VS_LMP_DN                | 1.30 | 0.72 | 0 | 0 | 0 | not significant |
| 11173 | GO_REGULATION_OF_PROTEIN_ADP_RIBOSYLATION                         | 1.30 | 0.7  | 0 | 0 | 0 | not significant |
| 11174 | GO_SECONDARY_PALATE_DEVELOPMENT                                   | 1.30 | 0.7  | 0 | 0 | 0 | not significant |
| 11175 | GO_CELL_MOTILITY                                                  | 1.31 | 2.65 | 0 | 0 | 0 | not significant |
| 11176 | GO_CELLULAR_RESPONSE_TO_OXYGEN_CONTAINING_COMPOUND                | 1.31 | 2.26 | 0 | 0 | 0 | not significant |
| 11177 | GO_CELLULAR_RESPONSE_TO_HORMONE_STIMULUS                          | 1.31 | 1.9  | 0 | 0 | 0 | not significant |
| 11178 | GO_MOLECULAR_ADAPTOR_ACTIVITY                                     | 1.31 | 1.33 | 0 | 0 | 0 | not significant |
| 11179 | GO_PROTEIN_LOCALIZATION_TO_ENDOPLASMIC_RETICULUM                  | 1.31 | 1.29 | 0 | 0 | 0 | not significant |
| 11180 | GO_CELLULAR_RESPONSE_TO_TOXIC_SUBSTANCE                           | 1.31 | 1.27 | 0 | 0 | 0 | not significant |
| 11181 | PICCALUGA_ANGIOIMMUNOBLASTIC_LYMPHOMA_DN                          | 1.31 | 1.26 | 0 | 0 | 0 | not significant |
| 11182 | PHONG_TNF_RESPONSE_VIA_P38_PARTIAL                                | 1.31 | 1.2  | 0 | 0 | 0 | not significant |
| 11183 | ESC_V6.5_UP_LATE.V1_DN                                            | 1.31 | 1.19 | 0 | 0 | 0 | not significant |
| 11184 | GO_SIGNAL_TRANSDUCTION_IN_RESPONSE_TO_DNA_DAMAGE                  | 1.31 | 1.14 | 0 | 0 | 0 | not significant |
| 11185 | PASQUALUCCI_LYMPHOMA_BY_GC_STAGE_DN                               | 1.31 | 1.14 | 0 | 0 | 0 | not significant |
| 11186 | JAK2_DN.V1_DN                                                     | 1.31 | 1.1  | 0 | 0 | 0 | not significant |
| 11187 | GO_REGULATION_OF_DNA_BINDING                                      | 1.31 | 1.08 | 0 | 0 | 0 | not significant |
| 11188 | TAKEDA_TARGETS_OF_NUP98_HOXA9_FUSION_8D_DN                        | 1.31 | 1.06 | 0 | 0 | 0 | not significant |
| 11189 | GO_VASCULOGENESIS                                                 | 1.31 | 0.97 | 0 | 0 | 0 | not significant |
| 11190 | GRADE_COLON_AND_RECTAL_CANCER_DN                                  | 1.31 | 0.97 | 0 | 0 | 0 | not significant |
| 11191 | CHR16Q24                                                          | 1.31 | 0.96 | 0 | 0 | 0 | not significant |
| 11192 | GO_DNA_DEPENDENT_DNA_REPLICATION_MAINTENANCE_OF_FIDELITY          | 1.31 | 0.96 | 0 | 0 | 0 | not significant |
| 11193 | GO_POSITIVE_REGULATION_OF_ALPHA_BETA_T_CELL_ACTIVATION            | 1.31 | 0.96 | 0 | 0 | 0 | not significant |
| 11194 | WOO_LIVER_CANCER_RECURRENCE_UP                                    | 1.31 | 0.96 | 0 | 0 | 0 | not significant |
| 11195 | GO_ISOPRENOID_METABOLIC_PROCESS                                   | 1.31 | 0.94 | 0 | 0 | 0 | not significant |
| 11196 | ROSS_LEUKEMIA_WITH_MLL_FUSIONS                                    | 1.31 | 0.94 | 0 | 0 | 0 | not significant |
| 11197 | REACTOME_TNF_SIGNALING                                            | 1.31 | 0.93 | 0 | 0 | 0 | not significant |
| 11198 | PID_IL6_7_PATHWAY                                                 | 1.31 | 0.92 | 0 | 0 | 0 | not significant |
| 11199 | ZHAN_MULTIPLE_MYELOMA_LB_DN                                       | 1.31 | 0.91 | 0 | 0 | 0 | not significant |
| 1200  | BIOCARTA_EGF_PATHWAY                                              | 1.31 | 0.9  | 0 | 0 | 0 | not significant |
| 1201  | GO_NEGATIVE_REGULATION_OF_CYTOKINE_SECRETION                      | 1.31 | 0.89 | 0 | 0 | 0 | not significant |
| 1202  | GO_POSITIVE_REGULATION_OF_DNA_RECOMBINATION                       | 1.31 | 0.88 | 0 | 0 | 0 | not significant |
| 1203  | TRACEY_RESISTANCE_TO_IFNA2_DN                                     | 1.31 | 0.88 | 0 | 0 | 0 | not significant |
| 1204  | GO_POSITIVE_REGULATION_OF_IMMUNOGLOBULIN_PRODUCTION               | 1.31 | 0.87 | 0 | 0 | 0 | not significant |
| 1205  | JIANG_TIP30_TARGETS_DN                                            | 1.31 | 0.87 | 0 | 0 | 0 | not significant |
| 1206  | BIOCARTA_NGF_PATHWAY                                              | 1.31 | 0.86 | 0 | 0 | 0 | not significant |
| 1207  | GO_SODIUM_CHANNEL_COMPLEX                                         | 1.31 | 0.86 | 0 | 0 | 0 | not significant |
| 1208  | GO_POSITIVE_REGULATION_OF_CELLULAR_CARBOHYDRATE_METABOLIC_PROCE   | 1.31 | 0.85 | 0 | 0 | 0 | not significant |
| 1209  | IWANAGA_E2F1_TARGETS_INDUCED_BY_SERUM                             | 1.31 | 0.85 | 0 | 0 | 0 | not significant |
| 1210  | REACTOME_TP53_REGULATES_TRANSCRIPTION_OF_CASPASE_ACTIVATORS_AND   | 1.31 | 0.85 | 0 | 0 | 0 | not significant |
| 1211  | PID_AR_NONGENOMIC_PATHWAY                                         | 1.31 | 0.84 | 0 | 0 | 0 | not significant |
| 1212  | PID_TCR_CALCIIUM_PATHWAY                                          | 1.31 | 0.83 | 0 | 0 | 0 | not significant |
| 1213  | PODAR_RESPONSE_TO_ADAPHOSTIN_DN                                   | 1.31 | 0.83 | 0 | 0 | 0 | not significant |
| 1214  | TSUNODA_CISPLATIN_RESISTANCE_DN                                   | 1.31 | 0.83 | 0 | 0 | 0 | not significant |
| 1215  | GO_ANTIOTIC_TRANSPORT                                             | 1.31 | 0.82 | 0 | 0 | 0 | not significant |

|       |                                                                     |      |      |   |   |   |                 |
|-------|---------------------------------------------------------------------|------|------|---|---|---|-----------------|
| 11216 | GO_ATP_DEPENDENT_PROTEIN_BINDING                                    | 1.31 | 0.82 | 0 | 0 | 0 | not significant |
| 11217 | GO_Glutathione_derivative_biosynthetic_process                      | 1.31 | 0.82 | 0 | 0 | 0 | not significant |
| 11218 | GO_OLIGOSACCHARIDE_CATABOLIC_PROCESS                                | 1.31 | 0.82 | 0 | 0 | 0 | not significant |
| 11219 | GO_POSITIVE_REGULATION_OF_MAST_CELL_ACTIVATION                      | 1.31 | 0.82 | 0 | 0 | 0 | not significant |
| 11220 | GO_POSITIVE_REGULATION_OF_MESENCHYMAL_CELL_PROLIFERATION            | 1.31 | 0.82 | 0 | 0 | 0 | not significant |
| 11221 | GO_REGULATION_OF_DNA_DIRECTED_DNA_POLYMERASE_ACTIVITY               | 1.31 | 0.82 | 0 | 0 | 0 | not significant |
| 11222 | FUJII_YBX1_TARGETS_UP                                               | 1.31 | 0.81 | 0 | 0 | 0 | not significant |
| 11223 | GO_LIVER_MORPHOGENESIS                                              | 1.31 | 0.81 | 0 | 0 | 0 | not significant |
| 11224 | SAKAI_CHRONIC_HEPATITIS_VS_LIVER_CANCER_DN                          | 1.31 | 0.81 | 0 | 0 | 0 | not significant |
| 11225 | GO_CELLULAR_RESPONSE_TO_PH                                          | 1.31 | 0.8  | 0 | 0 | 0 | not significant |
| 11226 | GO_HEART_VALVE_FORMATION                                            | 1.31 | 0.8  | 0 | 0 | 0 | not significant |
| 11227 | VALK_AML_CLUSTER_3                                                  | 1.31 | 0.8  | 0 | 0 | 0 | not significant |
| 11228 | GO_AMP_BINDING                                                      | 1.31 | 0.79 | 0 | 0 | 0 | not significant |
| 11229 | GO_CARBON_NITROGEN_LYASE_ACTIVITY                                   | 1.31 | 0.79 | 0 | 0 | 0 | not significant |
| 11230 | GO_CRANIOFACIAL_SUTURE_MORPHOGENESIS                                | 1.31 | 0.79 | 0 | 0 | 0 | not significant |
| 11231 | SCIAN_CELL_CYCLE_TARGETS_OF_TP53_AND_TP73_UP                        | 1.31 | 0.79 | 0 | 0 | 0 | not significant |
| 11232 | GO_CALCIIUM_ACTIVATED_POTASSIUM_CHANNEL_ACTIVITY                    | 1.31 | 0.78 | 0 | 0 | 0 | not significant |
| 11233 | GO_LIPOPROTEIN_CATABOLIC_PROCESS                                    | 1.31 | 0.78 | 0 | 0 | 0 | not significant |
| 11234 | GO_METALLOCARBOXYPEPTIDASE_ACTIVITY                                 | 1.31 | 0.77 | 0 | 0 | 0 | not significant |
| 11235 | GO_NEGATIVE_REGULATION_OF_AMYLOID_PRECURSOR_PROTEIN_BIOSYNTHETIC    | 1.31 | 0.77 | 0 | 0 | 0 | not significant |
| 11236 | GO_REGULATION_OF_MEMBRANE_INVAGINATION                              | 1.31 | 0.77 | 0 | 0 | 0 | not significant |
| 11237 | GO_ESTROGEN_BIOSYNTHETIC_PROCESS                                    | 1.31 | 0.76 | 0 | 0 | 0 | not significant |
| 11238 | GO_MITOTIC_CELL_CYCLE_ARREST                                        | 1.31 | 0.74 | 0 | 0 | 0 | not significant |
| 11239 | GO_DOLICHYL_PHOSPHATE_MANNANOSE_PROTEIN_MANNOSYLTRANSFERASE_ACTIV   | 1.31 | 0.73 | 0 | 0 | 0 | not significant |
| 11240 | GO_REGULATION_OF_HEAT_GENERATION                                    | 1.31 | 0.73 | 0 | 0 | 0 | not significant |
| 11241 | ZWANG_TRANSIENTLY_UP_BY_1ST_EGF_PULSE_ONLY                          | 1.32 | 4    | 0 | 0 | 0 | not significant |
| 11242 | GO_TUBE_DEVELOPMENT                                                 | 1.32 | 2.33 | 0 | 0 | 0 | not significant |
| 11243 | GO_REGULATION_OF_LIPID_METABOLIC_PROCESS                            | 1.32 | 1.58 | 0 | 0 | 0 | not significant |
| 11244 | AMUNDSON_RESPONSE_TO_ARSENITE                                       | 1.32 | 1.42 | 0 | 0 | 0 | not significant |
| 11245 | GO_REGULATION_OF_SMALL_MOLECULE_METABOLIC_PROCESS                   | 1.32 | 1.35 | 0 | 0 | 0 | not significant |
| 11246 | ZHENG_FOXP3_TARGETS_IN_THYMUS_UP                                    | 1.32 | 1.35 | 0 | 0 | 0 | not significant |
| 11247 | CHR12Q13                                                            | 1.32 | 1.33 | 0 | 0 | 0 | not significant |
| 11248 | PGF_UP.V1_DN                                                        | 1.32 | 1.26 | 0 | 0 | 0 | not significant |
| 11249 | GO_POSITIVE_REGULATION_OF_JNK_CASCADE                               | 1.32 | 1.22 | 0 | 0 | 0 | not significant |
| 11250 | RAF_UP.V1_UP                                                        | 1.32 | 1.19 | 0 | 0 | 0 | not significant |
| 11251 | GO_MAINTENANCE_OF_LOCATION_IN_CELL                                  | 1.32 | 1.17 | 0 | 0 | 0 | not significant |
| 11252 | GO_POSITIVE_REGULATION_OF_LEUKOCYTE_DIFFERENTIATION                 | 1.32 | 1.14 | 0 | 0 | 0 | not significant |
| 11253 | GO_GROWTH_FACTOR_BINDING                                            | 1.32 | 1.1  | 0 | 0 | 0 | not significant |
| 11254 | TURASHVILI_BREAST_DUCTAL_CARCINOMA_VS_DUCTAL_NORMAL_DN              | 1.32 | 1.07 | 0 | 0 | 0 | not significant |
| 11255 | GO_POSITIVE_REGULATION_OF_LEUKOCYTE_MIGRATION                       | 1.32 | 1.06 | 0 | 0 | 0 | not significant |
| 11256 | MOHANKUMAR_TLX1_TARGETS_DN                                          | 1.32 | 1.05 | 0 | 0 | 0 | not significant |
| 11257 | RAMALHO_STEMNESS_DN                                                 | 1.32 | 1.01 | 0 | 0 | 0 | not significant |
| 11258 | FAELT_B_CLL_WITH_VH3_21_DN                                          | 1.32 | 1    | 0 | 0 | 0 | not significant |
| 11259 | GO_CHEMOKINE_PRODUCTION                                             | 1.32 | 0.97 | 0 | 0 | 0 | not significant |
| 11260 | LEIN_PONS_MARKERS                                                   | 1.32 | 0.97 | 0 | 0 | 0 | not significant |
| 11261 | GO_INTRINSIC_APOPTOTIC_SIGNALING_PATHWAY_IN_RESPONSE_TO_ENDOPLASM   | 1.32 | 0.95 | 0 | 0 | 0 | not significant |
| 11262 | GO_LIGAND_GATED_ION_CHANNEL_ACTIVITY                                | 1.32 | 0.94 | 0 | 0 | 0 | not significant |
| 11263 | GO_TETRAPYRROLE_METABOLIC_PROCESS                                   | 1.32 | 0.94 | 0 | 0 | 0 | not significant |
| 11264 | GO_AMYLOID_PRECURSOR_PROTEIN_METABOLIC_PROCESS                      | 1.32 | 0.92 | 0 | 0 | 0 | not significant |
| 11265 | GO_NEGATIVE_REGULATION_OF_SMOOTH_MUSCLE_CELL_PROLIFERATION          | 1.32 | 0.92 | 0 | 0 | 0 | not significant |
| 11266 | GO_POSITIVE_CHEMOTAXIS                                              | 1.32 | 0.92 | 0 | 0 | 0 | not significant |
| 11267 | GO_PROTEIN_DEACETYLASE_ACTIVITY                                     | 1.32 | 0.91 | 0 | 0 | 0 | not significant |
| 11268 | LEE_LIVER_CANCER_CIPROFIBRATE_UP                                    | 1.32 | 0.9  | 0 | 0 | 0 | not significant |
| 11269 | GO_ENDOPLASMIC_RETICULUM_TO_CYTOSOL_TRANSPORT                       | 1.32 | 0.89 | 0 | 0 | 0 | not significant |
| 11270 | TING_SILENCED_BY_DICER                                              | 1.32 | 0.89 | 0 | 0 | 0 | not significant |
| 11271 | GO_POSITIVE_REGULATION_OF_CHEMOKINE_PRODUCTION                      | 1.32 | 0.88 | 0 | 0 | 0 | not significant |
| 11272 | GO_CELL_MOTILITY_INVOLVED_IN_CEREBRAL_CORTEX_RADIAL_GLIA_GUIDED_MIG | 1.32 | 0.88 | 0 | 0 | 0 | not significant |
| 11273 | GO_CHROMAFFIN_GRANULE                                               | 1.32 | 0.87 | 0 | 0 | 0 | not significant |
| 11274 | SAMOLS_TARGETS_OF_KHSV_MIRNAS_DN                                    | 1.32 | 0.87 | 0 | 0 | 0 | not significant |
| 11275 | GO_VASCULAR_ENDOTHELIAL_GROWTH_FACTOR_SIGNALING_PATHWAY             | 1.32 | 0.86 | 0 | 0 | 0 | not significant |
| 11276 | HAN_JNK_SIGNALING_UP                                                | 1.32 | 0.86 | 0 | 0 | 0 | not significant |
| 11277 | SPIRA_SMOKERS_LUNG_CANCER_UP                                        | 1.32 | 0.86 | 0 | 0 | 0 | not significant |
| 11278 | GO_CELL_FATE_DETERMINATION                                          | 1.32 | 0.85 | 0 | 0 | 0 | not significant |
| 11279 | GO_NEUROTRANSMITTER_RECEPTOR_ACTIVITY                               | 1.32 | 0.85 | 0 | 0 | 0 | not significant |
| 11280 | GO_PROSTANOID_METABOLIC_PROCESS                                     | 1.32 | 0.84 | 0 | 0 | 0 | not significant |
| 11281 | GO_MITOCHONDRIAL_DNA_METABOLIC_PROCESS                              | 1.32 | 0.83 | 0 | 0 | 0 | not significant |
| 11282 | GO_NEGATIVE_REGULATION_OF_FATTY_ACID_OXIDATION                      | 1.32 | 0.83 | 0 | 0 | 0 | not significant |
| 11283 | MCCLUNG_DELTA_FOSB_TARGETS_2WK                                      | 1.32 | 0.83 | 0 | 0 | 0 | not significant |
| 11284 | GO_CELLULAR_RESPONSE_TO_FOLLICLE_STIMULATING_HORMONE_STIMULUS       | 1.32 | 0.82 | 0 | 0 | 0 | not significant |
| 11285 | GO_XENOBIOTIC_TRANSPORT                                             | 1.32 | 0.82 | 0 | 0 | 0 | not significant |
| 11286 | GO_PROTEIN_CARBOXYL_O_METHYLTRANSFERASE_ACTIVITY                    | 1.32 | 0.81 | 0 | 0 | 0 | not significant |
| 11287 | GO ESTRADIOL_17_BETA_DEHYDROGENASE_ACTIVITY                         | 1.32 | 0.8  | 0 | 0 | 0 | not significant |
| 11288 | GO_VOLTAGE_GATED_SODIUM_CHANNEL_COMPLEX                             | 1.32 | 0.8  | 0 | 0 | 0 | not significant |
| 11289 | GO_GUANYLATE_KINASE_ACTIVITY                                        | 1.32 | 0.79 | 0 | 0 | 0 | not significant |
| 11290 | GO_DNA_LIGATION_INVOLVED_IN_DNA_REPAIR                              | 1.32 | 0.78 | 0 | 0 | 0 | not significant |
| 11291 | GO_CELLULAR_RESPONSE_TO_GLUCAGON_STIMULUS                           | 1.32 | 0.77 | 0 | 0 | 0 | not significant |
| 11292 | GO_ESTROUS_CYCLE                                                    | 1.32 | 0.77 | 0 | 0 | 0 | not significant |
| 11293 | GO_GTP_RHO_BINDING                                                  | 1.32 | 0.77 | 0 | 0 | 0 | not significant |
| 11294 | GO_PROTEIN_AUTOADP_RIBOSYLATION                                     | 1.32 | 0.77 | 0 | 0 | 0 | not significant |
| 11295 | GO_STABILIZATION_OF_MEMBRANE_POTENTIAL                              | 1.32 | 0.77 | 0 | 0 | 0 | not significant |
| 11296 | CHR1P33                                                             | 1.32 | 0.76 | 0 | 0 | 0 | not significant |
| 11297 | GO_NEGATIVE_REGULATION_OF_FATTY_ACID_METABOLIC_PROCESS              | 1.32 | 0.76 | 0 | 0 | 0 | not significant |
| 11298 | GO_POSITIVE_REGULATION_OF_INTEGRIN_ACTIVATION                       | 1.32 | 0.74 | 0 | 0 | 0 | not significant |
| 11299 | GO_LOCOMOTION                                                       | 1.33 | 2.94 | 0 | 0 | 0 | not significant |
| 11300 | GO_WHOLE_MEMBRANE                                                   | 1.33 | 2.94 | 0 | 0 | 0 | not significant |
| 11301 | GO_ION_TRANSPORT                                                    | 1.33 | 2.93 | 0 | 0 | 0 | not significant |
| 11302 | GO_CATION_TRANSPORT                                                 | 1.33 | 2.91 | 0 | 0 | 0 | not significant |
| 11303 | ZWANG_TRANSIENTLY_UP_BY_2ND_EGF_PULSE_ONLY                          | 1.33 | 2.33 | 0 | 0 | 0 | not significant |
| 11304 | PEDERSEN_METASTASIS_BY_ERBB2_ISOFORM_7                              | 1.33 | 1.77 | 0 | 0 | 0 | not significant |
| 11305 | GO_ORGANELLE_SUBCOMPARTMENT                                         | 1.33 | 1.67 | 0 | 0 | 0 | not significant |
| 11306 | GO_CELLULAR_RESPONSE_TO_EXTRACELLULAR_STIMULUS                      | 1.33 | 1.53 | 0 | 0 | 0 | not significant |
| 11307 | GO_PROTEIN_MATURATION                                               | 1.33 | 1.46 | 0 | 0 | 0 | not significant |
| 11308 | GO_AMEBOIDAL_TYPE_CELL_MIGRATION                                    | 1.33 | 1.44 | 0 | 0 | 0 | not significant |
| 11309 | GO_REGULATION_OF_T_CELL_ACTIVATION                                  | 1.33 | 1.43 | 0 | 0 | 0 | not significant |
| 11310 | GO_DNA_DEPENDENT_DNA_REPLICATION                                    | 1.33 | 1.38 | 0 | 0 | 0 | not significant |
| 11311 | GO_VACUOLE_ORGANIZATION                                             | 1.33 | 1.32 | 0 | 0 | 0 | not significant |
| 11312 | HALLMARK_APOPTOSIS                                                  | 1.33 | 1.28 | 0 | 0 | 0 | not significant |
| 11313 | FLORIO_NEOCORTEX_BASAL_RADIAL_GLIA_UP                               | 1.33 | 1.25 | 0 | 0 | 0 | not significant |
| 11314 | ELVIDGE_HIF1A_TARGETS_DN                                            | 1.33 | 1.17 | 0 | 0 | 0 | not significant |
| 11315 | DURAND_STROMA_NS_UP                                                 | 1.33 | 1.16 | 0 | 0 | 0 | not significant |
| 11316 | GO_PRESYNAPTIC_MEMBRANE                                             | 1.33 | 1.16 | 0 | 0 | 0 | not significant |
| 11317 | GO_REGULATION_OF_RESPONSE_TO_ENDOPLASMIC_RETICULUM_STRESS           | 1.33 | 1.14 | 0 | 0 | 0 | not significant |
| 11318 | MCBRYAN_PUBERTAL_BREAST_3_4WK_UP                                    | 1.33 | 1.14 | 0 | 0 | 0 | not significant |
| 11319 | GO_SPECIFIC_GRANULE_MEMBRANE                                        | 1.33 | 1.09 | 0 | 0 | 0 | not significant |
| 11320 | GO_IMMUNOGLOBULIN_PRODUCTION                                        | 1.33 | 1.07 | 0 | 0 | 0 | not significant |
| 11321 | SHAFFER_IRF4_TARGETS_IN_ACTIVATED_DENDRITIC_CELL                    | 1.33 | 1.07 | 0 | 0 | 0 | not significant |
| 11322 | ROSS_AML_WITH_MLL_FUSIONS                                           | 1.33 | 1.06 | 0 | 0 | 0 | not significant |
| 11323 | CRX_NRL_DN.V1_UP                                                    | 1.33 | 1.05 | 0 | 0 | 0 | not significant |
| 11324 | AKL_HTLV1_INFECTION_DN                                              | 1.33 | 1.04 | 0 | 0 | 0 | not significant |

|       |                                                                     |      |      |   |   |   |                 |
|-------|---------------------------------------------------------------------|------|------|---|---|---|-----------------|
| 11325 | VANASSE_BCL2_TARGETS_DN                                             | 1.33 | 1.04 | 0 | 0 | 0 | not significant |
| 11326 | WIELAND_UP_BY_HBV_INFECTION                                         | 1.33 | 1.04 | 0 | 0 | 0 | not significant |
| 11327 | GO_NEGATIVE_REGULATION_OF_DEVELOPMENTAL_GROWTH                      | 1.33 | 1.02 | 0 | 0 | 0 | not significant |
| 11328 | ZHAN_MULTIPLE_MYELOMA_HP_DN                                         | 1.33 | 1.01 | 0 | 0 | 0 | not significant |
| 11329 | BOYALT_LIVER_CANCER_SUBCLASS_G6_UP                                  | 1.33 | 0.98 | 0 | 0 | 0 | not significant |
| 11330 | GO_SELECTIVE_AUTOPHAGY                                              | 1.33 | 0.98 | 0 | 0 | 0 | not significant |
| 11331 | GERHOLD_ADIPOGENESIS_UP                                             | 1.33 | 0.97 | 0 | 0 | 0 | not significant |
| 11332 | KRAS.LUNG_UP.V1_DN                                                  | 1.33 | 0.96 | 0 | 0 | 0 | not significant |
| 11333 | GO_REGULATION_OF_MYOTUBE_DIFFERENTIATION                            | 1.33 | 0.95 | 0 | 0 | 0 | not significant |
| 11334 | GO_LYTIC_VACUOLE_ORGANIZATION                                       | 1.33 | 0.94 | 0 | 0 | 0 | not significant |
| 11335 | REACTOME_CHEMOKINE_RECEPTORS_BIND_CHEMOKINES                        | 1.33 | 0.94 | 0 | 0 | 0 | not significant |
| 11336 | PID_BARD1_PATHWAY                                                   | 1.33 | 0.93 | 0 | 0 | 0 | not significant |
| 11337 | GO_MONOCYTE_CHEMOTACTIC_PROTEIN_1_PRODUCTION                        | 1.33 | 0.89 | 0 | 0 | 0 | not significant |
| 11338 | GO_POSITIVE_REGULATION_OF_ERBB_SIGNALING_PATHWAY                    | 1.33 | 0.87 | 0 | 0 | 0 | not significant |
| 11339 | REACTOME_TNF_RECEPTOR_SUPERFAMILY_TNFSF_MEMBERS_MEDIATING_NON_C     | 1.33 | 0.87 | 0 | 0 | 0 | not significant |
| 11340 | GO_GALACTOSE_METABOLIC_PROCESS                                      | 1.33 | 0.86 | 0 | 0 | 0 | not significant |
| 11341 | GO_ALPHA_BETA_T_CELL_LINEAGE_COMMITMENT                             | 1.33 | 0.85 | 0 | 0 | 0 | not significant |
| 11342 | GO_DEVELOPMENTAL_INDUCATION                                         | 1.33 | 0.85 | 0 | 0 | 0 | not significant |
| 11343 | GO_PROTEIN_UFMYLATION                                               | 1.33 | 0.85 | 0 | 0 | 0 | not significant |
| 11344 | GO_REGULATION_OF_THYMOCYTE_APOPTOTIC_PROCESS                        | 1.33 | 0.85 | 0 | 0 | 0 | not significant |
| 11345 | GO_DNA_CATABOLIC_PROCESS_EXONUCLEOLYTIC                             | 1.33 | 0.84 | 0 | 0 | 0 | not significant |
| 11346 | GO_LOW_DENSITY_LIPOPROTEIN_PARTICLE_BINDING                         | 1.33 | 0.84 | 0 | 0 | 0 | not significant |
| 11347 | GO_STRIATUM_DEVELOPMENT                                             | 1.33 | 0.84 | 0 | 0 | 0 | not significant |
| 11348 | GO_CHLORIDE_ION_HOMEOSTASIS                                         | 1.33 | 0.83 | 0 | 0 | 0 | not significant |
| 11349 | GO_POSITIVE_REGULATION_OF_SPROUTING_ANGIOGENESIS                    | 1.33 | 0.83 | 0 | 0 | 0 | not significant |
| 11350 | KEGG_OTHER_GLYCAN_DEGRADATION                                       | 1.33 | 0.83 | 0 | 0 | 0 | not significant |
| 11351 | GO_INOSITOL_TRISPHOSPHATE_BIOSYNTHETIC_PROCESS                      | 1.33 | 0.82 | 0 | 0 | 0 | not significant |
| 11352 | GO_NEGATIVE_REGULATION_OF_FATTY_ACID_TRANSPORT                      | 1.33 | 0.82 | 0 | 0 | 0 | not significant |
| 11353 | GO_NEGATIVE_REGULATION_OF_T_CELL_DIFFERENTIATION_IN_THYMUS          | 1.33 | 0.82 | 0 | 0 | 0 | not significant |
| 11354 | GO_POSITIVE_REGULATION_OF_STEROL_TRANSPORT                          | 1.33 | 0.82 | 0 | 0 | 0 | not significant |
| 11355 | GO_THIAMINE_PYROPHOSPHATE_BINDING                                   | 1.33 | 0.82 | 0 | 0 | 0 | not significant |
| 11356 | GO_POLYSACCHARIDE_BINDING                                           | 1.33 | 0.81 | 0 | 0 | 0 | not significant |
| 11357 | KEGG_METABOLISM_OF_XENOBIOTICS_BY_CYTOCHROME_P450                   | 1.33 | 0.81 | 0 | 0 | 0 | not significant |
| 11358 | KUROZUMI_RESPONSE_TO_ONCOCYTIC_VIRUS_AND_CYCLIC_RGD                 | 1.33 | 0.81 | 0 | 0 | 0 | not significant |
| 11359 | CHRAQ34                                                             | 1.33 | 0.8  | 0 | 0 | 0 | not significant |
| 11360 | GO_REGULATION_OF_CGMP_MEDIATED_SIGNALING                            | 1.33 | 0.8  | 0 | 0 | 0 | not significant |
| 11361 | GO_REGULATION_OF_T_HELPER_1_TYPE_IMMUNE_RESPONSE                    | 1.33 | 0.8  | 0 | 0 | 0 | not significant |
| 11362 | GO_STRUCTURAL_CONSTITUENT_OF_SYNAPSE                                | 1.33 | 0.8  | 0 | 0 | 0 | not significant |
| 11363 | WANG_BARRETTES_ESOPHAGUS_AND_ESOPHAGUS_CANCER_UP                    | 1.33 | 0.8  | 0 | 0 | 0 | not significant |
| 11364 | GO_AMPA_GLUTAMATE_RECEPTOR_COMPLEX                                  | 1.33 | 0.79 | 0 | 0 | 0 | not significant |
| 11365 | GO_ANGIOTENSIN_ACTIVATED_SIGNALING_PATHWAY                          | 1.33 | 0.78 | 0 | 0 | 0 | not significant |
| 11366 | GO_CELL_MATRIX_ADHESION_MEDIATOR_ACTIVITY                           | 1.33 | 0.76 | 0 | 0 | 0 | not significant |
| 11367 | PASQUALUCCI_LYMPHOMA_BY_GC_STAGE_UP                                 | 1.34 | 1.67 | 0 | 0 | 0 | not significant |
| 11368 | GO_RESPONSE_TO_RADIATION                                            | 1.34 | 1.66 | 0 | 0 | 0 | not significant |
| 11369 | GO_POSITIVE_REGULATION_OF_CELL_ACTIVATION                           | 1.34 | 1.61 | 0 | 0 | 0 | not significant |
| 11370 | KUMAR_TARGETS_OF_MLL_AF9_FUSION                                     | 1.34 | 1.61 | 0 | 0 | 0 | not significant |
| 11371 | GO_REGULATION_OF_NEUROTRANSMITTER_LEVELS                            | 1.34 | 1.48 | 0 | 0 | 0 | not significant |
| 11372 | GO_CELLULAR_LIPID_CATABOLIC_PROCESS                                 | 1.34 | 1.4  | 0 | 0 | 0 | not significant |
| 11373 | NAGASHIMA_NRG1_SIGNALING_UP                                         | 1.34 | 1.34 | 0 | 0 | 0 | not significant |
| 11374 | GO_REGULATION_OF_LYMPHOCYTE_DIFFERENTIATION                         | 1.34 | 1.31 | 0 | 0 | 0 | not significant |
| 11375 | GO_PLASMA_MEMBRANE_RECEPTOR_COMPLEX                                 | 1.34 | 1.24 | 0 | 0 | 0 | not significant |
| 11376 | VERHAAK_AML_WITH_NPM1_MUTATED_UP                                    | 1.34 | 1.23 | 0 | 0 | 0 | not significant |
| 11377 | GO_ATPASE_ACTIVITY_COUPLED_TO_MOVEMENT_OF_SUBSTANCES                | 1.34 | 1.22 | 0 | 0 | 0 | not significant |
| 11378 | RODWELL_AGING_KIDNEY_NO_BLOOD_UP                                    | 1.34 | 1.21 | 0 | 0 | 0 | not significant |
| 11379 | REACTOME_AMYLOID_FIBER_FORMATION                                    | 1.34 | 1.19 | 0 | 0 | 0 | not significant |
| 11380 | GO_POSITIVE_REGULATION_OF_EPITHELIAL_CELL_MIGRATION                 | 1.34 | 1.16 | 0 | 0 | 0 | not significant |
| 11381 | REACTOME_PLASMA_LIPOPROTEIN_ASSEMBLY_REMODELING_AND_CLEARANCE       | 1.34 | 1.12 | 0 | 0 | 0 | not significant |
| 11382 | RHEIN_ALL_GLUCOCORTICOID_THERAPY_UP                                 | 1.34 | 1.1  | 0 | 0 | 0 | not significant |
| 11383 | ASTIER_INTEGRIN_SIGNALING                                           | 1.34 | 1.07 | 0 | 0 | 0 | not significant |
| 11384 | GO_ANTIOXIDANT_ACTIVITY                                             | 1.34 | 1.02 | 0 | 0 | 0 | not significant |
| 11385 | KRAS.PROSTATE_UP.V1_DN                                              | 1.34 | 1    | 0 | 0 | 0 | not significant |
| 11386 | GO_NATURAL_KILLER_CELL_ACTIVATION                                   | 1.34 | 0.99 | 0 | 0 | 0 | not significant |
| 11387 | GO_GPI_ANCHOR_BIOSYNTHETIC_PROCESS                                  | 1.34 | 0.98 | 0 | 0 | 0 | not significant |
| 11388 | BOYLAN_MULTIPLE_MYELOMA_C_DN                                        | 1.34 | 0.96 | 0 | 0 | 0 | not significant |
| 11389 | GO_NEGATIVE_REGULATION_OF_TYPE_I_INTERFERON_PRODUCTION              | 1.34 | 0.96 | 0 | 0 | 0 | not significant |
| 11390 | PID_ARF6_TRAFFICKING_PATHWAY                                        | 1.34 | 0.96 | 0 | 0 | 0 | not significant |
| 11391 | GO_RESPONSE_TO_LIGHT_INTENSITY                                      | 1.34 | 0.95 | 0 | 0 | 0 | not significant |
| 11392 | GO_PHOSPHOLIPID_TRANSLOCATING_ATPASE_ACTIVITY                       | 1.34 | 0.93 | 0 | 0 | 0 | not significant |
| 11393 | GO_AUTONOMIC_NERVOUS_SYSTEM_DEVELOPMENT                             | 1.34 | 0.92 | 0 | 0 | 0 | not significant |
| 11394 | GO_REGULATION_OF_FIBROBLAST_GROWTH_FACTOR_RECEPTOR_SIGNALING_P/     | 1.34 | 0.92 | 0 | 0 | 0 | not significant |
| 11395 | GO_RESPONSE_TO_PROGESTERONE                                         | 1.34 | 0.92 | 0 | 0 | 0 | not significant |
| 11396 | EPPERT_CE_HSC_LSC                                                   | 1.34 | 0.91 | 0 | 0 | 0 | not significant |
| 11397 | GO_POSTSYNAPTIC_ENDOSOME                                            | 1.34 | 0.91 | 0 | 0 | 0 | not significant |
| 11398 | GO_KILLING_OF_CELLS_OF_OTHER_ORGANISM                               | 1.34 | 0.9  | 0 | 0 | 0 | not significant |
| 11399 | GO_NLRP3_INFLAMMASOME_COMPLEX                                       | 1.34 | 0.9  | 0 | 0 | 0 | not significant |
| 11400 | KEGG_DRUG_METABOLISM_CYTOCHROME_P450                                | 1.34 | 0.9  | 0 | 0 | 0 | not significant |
| 11401 | BIOCARTA_TCAPOPTOSIS_PATHWAY                                        | 1.34 | 0.89 | 0 | 0 | 0 | not significant |
| 11402 | GO_SUBPALLIUM_DEVELOPMENT                                           | 1.34 | 0.89 | 0 | 0 | 0 | not significant |
| 11403 | KEGG_ARACHIDONIC_ACID_METABOLISM                                    | 1.34 | 0.89 | 0 | 0 | 0 | not significant |
| 11404 | REACTOME_HS_GAG_BIOSYNTHESIS                                        | 1.34 | 0.88 | 0 | 0 | 0 | not significant |
| 11405 | WENG_POR_TARGETS_GLOBAL_DN                                          | 1.34 | 0.88 | 0 | 0 | 0 | not significant |
| 11406 | GO_CHROMAFFIN_GRANULE_MEMBRANE                                      | 1.34 | 0.87 | 0 | 0 | 0 | not significant |
| 11407 | GO_CYSTEINE_TYPE_ENDOPEPTIDASE_ACTIVITY_INVOLVED_IN_APOPTOTIC_PROC  | 1.34 | 0.87 | 0 | 0 | 0 | not significant |
| 11408 | GO_POSITIVE_REGULATION_OF_MAST_CELL_ACTIVATION_INVOLVED_IN_IMMUNE_F | 1.34 | 0.87 | 0 | 0 | 0 | not significant |
| 11409 | GO_RESPONSE_TO_STEROL_DEPLETION                                     | 1.34 | 0.87 | 0 | 0 | 0 | not significant |
| 11410 | REACTOME_ABC_TRANSPORTERS_IN_LIPID_HOMEOSTASIS                      | 1.34 | 0.87 | 0 | 0 | 0 | not significant |
| 11411 | TERAMOTO_OPN_TARGETS_CLUSTER_5                                      | 1.34 | 0.87 | 0 | 0 | 0 | not significant |
| 11412 | GO_MANNANOSE_METABOLIC_PROCESS                                      | 1.34 | 0.86 | 0 | 0 | 0 | not significant |
| 11413 | GO_POSITIVE_REGULATION_OF_INTERLEUKIN_8_PRODUCTION                  | 1.34 | 0.86 | 0 | 0 | 0 | not significant |
| 11414 | GO_POSITIVE_REGULATION_OF_NEURON_PROJECTION_REGENERATION            | 1.34 | 0.86 | 0 | 0 | 0 | not significant |
| 11415 | GO_PROTEIN_ADP_RIBOSYLASE_ACTIVITY                                  | 1.34 | 0.86 | 0 | 0 | 0 | not significant |
| 11416 | GO_PROTON_TRANSPORTING_TWO_SECTOR_ATPASE_COMPLEX_PROTON_TRAN        | 1.34 | 0.86 | 0 | 0 | 0 | not significant |
| 11417 | REACTOME_MYOGENESIS                                                 | 1.34 | 0.86 | 0 | 0 | 0 | not significant |
| 11418 | GO_ACYLGLYCEROL_HOMEOSTASIS                                         | 1.34 | 0.85 | 0 | 0 | 0 | not significant |
| 11419 | GO_SREBP_SIGNALING_PATHWAY                                          | 1.34 | 0.85 | 0 | 0 | 0 | not significant |
| 11420 | HOWLIN_CITED1_TARGETS_2_UP                                          | 1.34 | 0.85 | 0 | 0 | 0 | not significant |
| 11421 | GO_CD4_POSITIVE_ALPHA_BETA_T_CELL_LINEAGE_COMMITMENT                | 1.34 | 0.84 | 0 | 0 | 0 | not significant |
| 11422 | GO_LYSOPHOSPHOLIPASE_ACTIVITY                                       | 1.34 | 0.84 | 0 | 0 | 0 | not significant |
| 11423 | GO_NEGATIVE_REGULATION_OF_INTERLEUKIN_10_PRODUCTION                 | 1.34 | 0.84 | 0 | 0 | 0 | not significant |
| 11424 | GO_POSITIVE_REGULATION_OF_NATURAL_KILLER_CELL_ACTIVATION            | 1.34 | 0.84 | 0 | 0 | 0 | not significant |
| 11425 | REACTOME_SIGNALING_BY_ACTIVIN                                       | 1.34 | 0.83 | 0 | 0 | 0 | not significant |
| 11426 | GO_CHROMATIN_MEDIATED_MAINTENANCE_OF_TRANSCRIPTION                  | 1.34 | 0.82 | 0 | 0 | 0 | not significant |
| 11427 | GO_HEAT_GENERATION                                                  | 1.34 | 0.82 | 0 | 0 | 0 | not significant |
| 11428 | GO_NEGATIVE_REGULATION_OF_TORC1_SIGNALING                           | 1.34 | 0.82 | 0 | 0 | 0 | not significant |
| 11429 | HE_PTEEN_TARGETS_DN                                                 | 1.34 | 0.81 | 0 | 0 | 0 | not significant |
| 11430 | SU_PLACENTA                                                         | 1.34 | 0.81 | 0 | 0 | 0 | not significant |
| 11431 | GO_POSITIVE_REGULATION_OF_PROTEIN_HOMOOLIGOMERIZATION               | 1.34 | 0.8  | 0 | 0 | 0 | not significant |
| 11432 | GO_REGULATION_OF_DNA_DEPENDENT_DNA_REPLICATION_INITIATION           | 1.34 | 0.8  | 0 | 0 | 0 | not significant |
| 11433 | REACTOME_UNWINDING_OF_DNA                                           | 1.34 | 0.77 | 0 | 0 | 0 | not significant |

|       |                                                                    |      |      |   |   |   |                 |
|-------|--------------------------------------------------------------------|------|------|---|---|---|-----------------|
| 11434 | BRUINS_UVC_RESPONSE_VIA_TP53_GROUP_A                               | 1.35 | 2.15 | 0 | 0 | 0 | not significant |
| 11435 | GO_CELLULAR_RESPONSE_TO_NITROGEN_COMPOUND                          | 1.35 | 2.07 | 0 | 0 | 0 | not significant |
| 11436 | BENPORATH_ES_WITH_H3K27ME3                                         | 1.35 | 1.91 | 0 | 0 | 0 | not significant |
| 11437 | GO_RESPONSE_TO_PEPTIDE_HORMONE                                     | 1.35 | 1.76 | 0 | 0 | 0 | not significant |
| 11438 | LIU_PROSTATE_CANCER_DN                                             | 1.35 | 1.67 | 0 | 0 | 0 | not significant |
| 11439 | GO_REGULATION_OF_LYMPHOCYTE_ACTIVATION                             | 1.35 | 1.65 | 0 | 0 | 0 | not significant |
| 11440 | MULLIGHAN_MLL_SIGNATURE_2_DN                                       | 1.35 | 1.57 | 0 | 0 | 0 | not significant |
| 11441 | FORTSCHEGGER_PHF8_TARGETS_UP                                       | 1.35 | 1.51 | 0 | 0 | 0 | not significant |
| 11442 | GO_REGULATION_OF_CYTOSOLIC_CALCIIUM_ION_CONCENTRATION              | 1.35 | 1.45 | 0 | 0 | 0 | not significant |
| 11443 | CHR16P13                                                           | 1.35 | 1.35 | 0 | 0 | 0 | not significant |
| 11444 | RICKMAN_TUMOR_DIFFERENTIATED_WELL_VS_MODERATELY_UP                 | 1.35 | 1.28 | 0 | 0 | 0 | not significant |
| 11445 | GO_LATE_ENDOSOME_MEMBRANE                                          | 1.35 | 1.27 | 0 | 0 | 0 | not significant |
| 11446 | GO_REGULATION_OF_PRODUCTION_OF_MOLECULAR_MEDIATOR_OF_IMMUNE_RE     | 1.35 | 1.25 | 0 | 0 | 0 | not significant |
| 11447 | GO_CELL_CELL_ADHESION_VIA_PLASMA_MEMBRANE_ADHESION_MOLECULES       | 1.35 | 1.24 | 0 | 0 | 0 | not significant |
| 11448 | BROWNE_HCMV_INFECTION_24HR_DN                                      | 1.35 | 1.21 | 0 | 0 | 0 | not significant |
| 11449 | GO_VASCULAR_PROCESS_IN_CIRCULATORY_SYSTEM                          | 1.35 | 1.21 | 0 | 0 | 0 | not significant |
| 11450 | GO_REGULATION_OF_BLOOD_PRESSURE                                    | 1.35 | 1.19 | 0 | 0 | 0 | not significant |
| 11451 | CHEN_LIVER_METABOLISM_QTL_CIS                                      | 1.35 | 1.17 | 0 | 0 | 0 | not significant |
| 11452 | GO_POSITIVE_REGULATION_OF_NEURON_DEATH                             | 1.35 | 1.17 | 0 | 0 | 0 | not significant |
| 11453 | LABBE_WNT3A_TARGETS_DN                                             | 1.35 | 1.17 | 0 | 0 | 0 | not significant |
| 11454 | MIKKELSEN_NPC_HCP_WITH_H3K27ME3                                    | 1.35 | 1.16 | 0 | 0 | 0 | not significant |
| 11455 | GO_ERAD_PATHWAY                                                    | 1.35 | 1.14 | 0 | 0 | 0 | not significant |
| 11456 | NABA_CORE_MATRISOME                                                | 1.35 | 1.13 | 0 | 0 | 0 | not significant |
| 11457 | GO_Glutamine_FAMILY_AMINO_ACID_METABOLIC_PROCESS                   | 1.35 | 1.12 | 0 | 0 | 0 | not significant |
| 11458 | YAO_TEMPORAL_RESPONSE_TO_PROGESTERONE_CLUSTER_12                   | 1.35 | 1.12 | 0 | 0 | 0 | not significant |
| 11459 | NABA_ECM_AFFILIATED                                                | 1.35 | 1.09 | 0 | 0 | 0 | not significant |
| 11460 | GO_REGULATION_OF_ALPHA_BETA_T_CELL_ACTIVATION                      | 1.35 | 1.07 | 0 | 0 | 0 | not significant |
| 11461 | REACTOME_INTERLEUKIN_2_FAMILY_SIGNALING                            | 1.35 | 1.06 | 0 | 0 | 0 | not significant |
| 11462 | GO_EXOGENOUS_PROTEIN_BINDING                                       | 1.35 | 1.05 | 0 | 0 | 0 | not significant |
| 11463 | GAVIN_FOXP3_TARGETS_CLUSTER_P2                                     | 1.35 | 1.04 | 0 | 0 | 0 | not significant |
| 11464 | MOREAUX_B_LYMPHOCYTE_MATURATION_BY_TACI_UP                         | 1.35 | 1.04 | 0 | 0 | 0 | not significant |
| 11465 | REACTOME_PLASMA_LIPOPROTEIN_CLEARANCE                              | 1.35 | 1.04 | 0 | 0 | 0 | not significant |
| 11466 | GO_AMINOGLYCAN_BIOSYNTHETIC_PROCESS                                | 1.35 | 1.03 | 0 | 0 | 0 | not significant |
| 11467 | BASSO_CD40_SIGNALING_DN                                            | 1.35 | 1.01 | 0 | 0 | 0 | not significant |
| 11468 | GULLAUMOND_KLF10_TARGETS_UP                                        | 1.35 | 1    | 0 | 0 | 0 | not significant |
| 11469 | GO_LIGASE_ACTIVITY_FORMING_CARBON_SULFUR_BONDS                     | 1.35 | 0.97 | 0 | 0 | 0 | not significant |
| 11470 | OHM_METHYLATED_IN_ADULT_CANCERS                                    | 1.35 | 0.97 | 0 | 0 | 0 | not significant |
| 11471 | CHR9P22                                                            | 1.35 | 0.96 | 0 | 0 | 0 | not significant |
| 11472 | GO_NEGATIVE_REGULATION_OF_LIPID_LOCALIZATION                       | 1.35 | 0.96 | 0 | 0 | 0 | not significant |
| 11473 | GO_BEHAVIORAL_RESPONSE_TO_PAIN                                     | 1.35 | 0.94 | 0 | 0 | 0 | not significant |
| 11474 | REACTOME_METABOLISM_OF_INGESTED_SEMET_SEC_MESEC_INTO_H2SE          | 1.35 | 0.94 | 0 | 0 | 0 | not significant |
| 11475 | GO_POSITIVE_REGULATION_OF_PRI_MIRNA_TRANSCRIPTION_BY_RNA_POLYMERAS | 1.35 | 0.93 | 0 | 0 | 0 | not significant |
| 11476 | GO_REGULATION_OF_HAIR_FOLLICLE_DEVELOPMENT                         | 1.35 | 0.93 | 0 | 0 | 0 | not significant |
| 11477 | HARRIS_BRAIN_CANCER_PROGENITORS                                    | 1.35 | 0.93 | 0 | 0 | 0 | not significant |
| 11478 | MAGRANGEAS_MULTIPLE_MYELOMA_IGLL_VS_IGLK_DN                        | 1.35 | 0.92 | 0 | 0 | 0 | not significant |
| 11479 | GO_TRANSMITTER_GATED_CHANNEL_ACTIVITY                              | 1.35 | 0.91 | 0 | 0 | 0 | not significant |
| 11480 | HERNANDEZ_MITOTIC_ARREST_BY_DOCETAXEL_1_UP                         | 1.35 | 0.91 | 0 | 0 | 0 | not significant |
| 11481 | GO_NEGATIVE_REGULATION_OF_BONE_REMODELING                          | 1.35 | 0.9  | 0 | 0 | 0 | not significant |
| 11482 | GO_REGULATION_OF_MAST_CELL_CHEMOTAXIS                              | 1.35 | 0.9  | 0 | 0 | 0 | not significant |
| 11483 | LOPEZ_MESOTHELIOMA_SURVIVAL_UP                                     | 1.35 | 0.9  | 0 | 0 | 0 | not significant |
| 11484 | REACTOME_TNFR1_INDUCED_PROAPOPTOTIC_SIGNALING                      | 1.35 | 0.9  | 0 | 0 | 0 | not significant |
| 11485 | GO_NEGATIVE_T_CELL_SELECTION                                       | 1.35 | 0.89 | 0 | 0 | 0 | not significant |
| 11486 | BIOCARTA_CDMAC_PATHWAY                                             | 1.35 | 0.88 | 0 | 0 | 0 | not significant |
| 11487 | GO_COMMON_PARTNER_SMAD_PROTEIN_PHOSPHORYLATION                     | 1.35 | 0.88 | 0 | 0 | 0 | not significant |
| 11488 | GO_MIDDLE_EAR_MORPHOGENESIS                                        | 1.35 | 0.88 | 0 | 0 | 0 | not significant |
| 11489 | REACTOME_DEFECTIVE_B4GALT7_CAUSES_EDS_PROGEROID_TYPE               | 1.35 | 0.88 | 0 | 0 | 0 | not significant |
| 11490 | REACTOME_Glutathione_SYNTHESIS_AND_RECYCLING                       | 1.35 | 0.88 | 0 | 0 | 0 | not significant |
| 11491 | REACTOME_SYNTHESIS_SECRETION_AND_INACTIVATION_OF_GLUcOSE_DEPENDE   | 1.35 | 0.88 | 0 | 0 | 0 | not significant |
| 11492 | GO_COCHLEA_MORPHOGENESIS                                           | 1.35 | 0.87 | 0 | 0 | 0 | not significant |
| 11493 | GO_NEGATIVE_REGULATION_OF_CARDIAC_MUSCLE_CELL_PROLIFERATION        | 1.35 | 0.87 | 0 | 0 | 0 | not significant |
| 11494 | LI_CYTIDINE_ANALOG_PATHWAY                                         | 1.35 | 0.86 | 0 | 0 | 0 | not significant |
| 11495 | REACTOME_NOREPINEPHRINE_NEUROTRANSMITTER_RELEASE_CYCLE             | 1.35 | 0.86 | 0 | 0 | 0 | not significant |
| 11496 | REACTOME_TFAP2_AP_2_FAMILY_REGULATES_TRANSCRIPTION_OF_GROWTH_FA    | 1.35 | 0.86 | 0 | 0 | 0 | not significant |
| 11497 | GO_REGULATION_OF_SYNAPTIC_VESICLE_FUSION_TO_PRESYNAPTIC_ACTIVE_ZOI | 1.35 | 0.85 | 0 | 0 | 0 | not significant |
| 11498 | GO_PHOSPHOLIPASE_A2_ACTIVITY_CONSUMING_1_2_DIPALMITOYLPHOSPHATIDYL | 1.35 | 0.84 | 0 | 0 | 0 | not significant |
| 11499 | YAO_TEMPORAL_RESPONSE_TO_PROGESTERONE_CLUSTER_5                    | 1.35 | 0.84 | 0 | 0 | 0 | not significant |
| 11500 | NIKOLSKY_BREAST_CANCER_21Q22_AMPLICON                              | 1.35 | 0.83 | 0 | 0 | 0 | not significant |
| 11501 | GO_CD4_POSITIVE_ALPHA_BETA_T_CELL_PROLIFERATION                    | 1.35 | 0.81 | 0 | 0 | 0 | not significant |
| 11502 | MEISSNER_BRAIN_HCP_WITH_H3K4ME3_AND_H3K27ME3                       | 1.36 | 2.32 | 0 | 0 | 0 | not significant |
| 11503 | GO_CARDIOVASCULAR_SYSTEM_DEVELOPMENT                               | 1.36 | 2.08 | 0 | 0 | 0 | not significant |
| 11504 | GO_RESPONSE_TO_EXTRACELLULAR_STIMULUS                              | 1.36 | 2.01 | 0 | 0 | 0 | not significant |
| 11505 | GO_METAL_ION_TRANSMEMBRANE_TRANSPORTER_ACTIVITY                    | 1.36 | 1.68 | 0 | 0 | 0 | not significant |
| 11506 | HELLER_HDAC_TARGETS_UP                                             | 1.36 | 1.68 | 0 | 0 | 0 | not significant |
| 11507 | HOLLMANN_APOPTOSIS_VIA_CD40_DN                                     | 1.36 | 1.57 | 0 | 0 | 0 | not significant |
| 11508 | GO_CELLULAR_RESPONSE_TO_PEPTIDE_HORMONE_STIMULUS                   | 1.36 | 1.56 | 0 | 0 | 0 | not significant |
| 11509 | GO_POSITIVE_REGULATION_OF_LYMPHOCYTE_ACTIVATION                    | 1.36 | 1.47 | 0 | 0 | 0 | not significant |
| 11510 | GO_RESPONSE_TO_XENOBIOTIC_STIMULUS                                 | 1.36 | 1.47 | 0 | 0 | 0 | not significant |
| 11511 | WINTER_HYPOXIA_METAGENE                                            | 1.36 | 1.47 | 0 | 0 | 0 | not significant |
| 11512 | GO_NEGATIVE_REGULATION_OF_DEFENSE_RESPONSE                         | 1.36 | 1.43 | 0 | 0 | 0 | not significant |
| 11513 | GAVIN_FOXP3_TARGETS_CLUSTER_P3                                     | 1.36 | 1.4  | 0 | 0 | 0 | not significant |
| 11514 | PLASARI_TGFB1_TARGETS_10HR_UP                                      | 1.36 | 1.3  | 0 | 0 | 0 | not significant |
| 11515 | JNK_DN.V1_DN                                                       | 1.36 | 1.24 | 0 | 0 | 0 | not significant |
| 11516 | BMI1_DN.V1_DN                                                      | 1.36 | 1.21 | 0 | 0 | 0 | not significant |
| 11517 | DAUER_STAT3_TARGETS_DN                                             | 1.36 | 1.19 | 0 | 0 | 0 | not significant |
| 11518 | CHR7Q36                                                            | 1.36 | 1.16 | 0 | 0 | 0 | not significant |
| 11519 | GO_REGULATION_OF_B_CELL_ACTIVATION                                 | 1.36 | 1.16 | 0 | 0 | 0 | not significant |
| 11520 | INGRAM_SHH_TARGETS_UP                                              | 1.36 | 1.15 | 0 | 0 | 0 | not significant |
| 11521 | GO_LYMPHOCYTE_MIGRATION                                            | 1.36 | 1.13 | 0 | 0 | 0 | not significant |
| 11522 | SAFFORD_T_LYMPHOCYTE_ANERGY                                        | 1.36 | 1.13 | 0 | 0 | 0 | not significant |
| 11523 | FONTAINE_FOLLICULAR_THYROID_ADENOMA_UP                             | 1.36 | 1.08 | 0 | 0 | 0 | not significant |
| 11524 | GO_REGULATION_OF_IMMUNOGLOBULIN_PRODUCTION                         | 1.36 | 1.08 | 0 | 0 | 0 | not significant |
| 11525 | PID_P38_ALPHA_BETA_DOWNSTREAM_PATHWAY                              | 1.36 | 1.08 | 0 | 0 | 0 | not significant |
| 11526 | GO_LEARNING                                                        | 1.36 | 1.07 | 0 | 0 | 0 | not significant |
| 11527 | GO_DNA_REPLICATION_INITIATION                                      | 1.36 | 1.06 | 0 | 0 | 0 | not significant |
| 11528 | GO_LYSOSOMAL_LUMEN_ACIDIFICATION                                   | 1.36 | 1.05 | 0 | 0 | 0 | not significant |
| 11529 | KEGG_DNA_REPLICATION                                               | 1.36 | 1.05 | 0 | 0 | 0 | not significant |
| 11530 | GO_INTRINSIC_COMPONENT_OF_SYNAPTIC_MEMBRANE                        | 1.36 | 1.04 | 0 | 0 | 0 | not significant |
| 11531 | HARRIS_HYPOXIA                                                     | 1.36 | 1.04 | 0 | 0 | 0 | not significant |
| 11532 | PID_MAPK_TRK_PATHWAY                                               | 1.36 | 1.03 | 0 | 0 | 0 | not significant |
| 11533 | POMEROY_MEDULLOBLASTOMA_PROGNOSIS_UP                               | 1.36 | 1.02 | 0 | 0 | 0 | not significant |
| 11534 | YAMASHITA_METHYLATED_IN_PROSTATE_CANCER                            | 1.36 | 1.01 | 0 | 0 | 0 | not significant |
| 11535 | GO_RESPONSE_TO_CHEMOKINE                                           | 1.36 | 1    | 0 | 0 | 0 | not significant |
| 11536 | GO_AXONEME_ASSEMBLY                                                | 1.36 | 0.99 | 0 | 0 | 0 | not significant |
| 11537 | LINDSTEDT_DENDRITIC_CELL_MATURATION_A                              | 1.36 | 0.99 | 0 | 0 | 0 | not significant |
| 11538 | GO_GLIAL_CELL_PROJECTION                                           | 1.36 | 0.98 | 0 | 0 | 0 | not significant |
| 11539 | GO_PROTEIN_HOMOTRIMERIZATION                                       | 1.36 | 0.98 | 0 | 0 | 0 | not significant |
| 11540 | HOLLEMAN_ASPARAGINASE_RESISTANCE_B_ALL_UP                          | 1.36 | 0.98 | 0 | 0 | 0 | not significant |
| 11541 | BIOCARTA_G1_PATHWAY                                                | 1.36 | 0.97 | 0 | 0 | 0 | not significant |
| 11542 | VERRECCHIA_RESPONSE_TO_TGFB1_C5                                    | 1.36 | 0.97 | 0 | 0 | 0 | not significant |

|       |                                                                   |      |      |   |   |   |                 |
|-------|-------------------------------------------------------------------|------|------|---|---|---|-----------------|
| 11543 | GO_IMMUNOGLOBULIN_SECRETION                                       | 1.36 | 0.96 | 0 | 0 | 0 | not significant |
| 11544 | GO_PRODUCTION_OF_MOLECULAR_MEDIATOR_INVOLVED_IN_INFLAMMATORY_RE   | 1.36 | 0.95 | 0 | 0 | 0 | not significant |
| 11545 | GO_T_CELL_CYTOKINE_PRODUCTION                                     | 1.36 | 0.95 | 0 | 0 | 0 | not significant |
| 11546 | GO_HISTONE_H3_K14_ACETYLATION                                     | 1.36 | 0.94 | 0 | 0 | 0 | not significant |
| 11547 | GO_NEGATIVE_REGULATION_OF_DOUBLE_STRAND_BREAK_REPAIR_VIA_HOMOLO   | 1.36 | 0.93 | 0 | 0 | 0 | not significant |
| 11548 | GO_ACROSOMAL_MEMBRANE                                             | 1.36 | 0.92 | 0 | 0 | 0 | not significant |
| 11549 | GO_INFLAMMASOME_COMPLEX                                           | 1.36 | 0.92 | 0 | 0 | 0 | not significant |
| 11550 | GO_NEGATIVE_REGULATION_OF_BLOOD_VESSEL_ENDOTHELIAL_CELL_MIGRATIO  | 1.36 | 0.92 | 0 | 0 | 0 | not significant |
| 11551 | GO_NEGATIVE_REGULATION_OF_BONE_MINERALIZATION                     | 1.36 | 0.92 | 0 | 0 | 0 | not significant |
| 11552 | REACTOME_CATION_COUPLED_CHLORIDE_COTRANSPORTERS                   | 1.36 | 0.92 | 0 | 0 | 0 | not significant |
| 11553 | BOWIE_RESPONSE_TO_EXTRACELLULAR_MATRIX                            | 1.36 | 0.91 | 0 | 0 | 0 | not significant |
| 11554 | GO_APOLIPOPROTEIN_BINDING                                         | 1.36 | 0.91 | 0 | 0 | 0 | not significant |
| 11555 | GO_PROTEIN_O_LINKED_MANNOSYLATION                                 | 1.36 | 0.91 | 0 | 0 | 0 | not significant |
| 11556 | GO_GMP_METABOLIC_PROCESS                                          | 1.36 | 0.9  | 0 | 0 | 0 | not significant |
| 11557 | GO_REGULATION_OF_ADENYLATE_CYCLASE_ACTIVATING_G_PROTEIN_COUPLED   | 1.36 | 0.9  | 0 | 0 | 0 | not significant |
| 11558 | BIOCARTA_IL7_PATHWAY                                              | 1.36 | 0.89 | 0 | 0 | 0 | not significant |
| 11559 | GO_ATRIAL_SEPTUM_MORPHOGENESIS                                    | 1.36 | 0.89 | 0 | 0 | 0 | not significant |
| 11560 | GO_CATALYTIC_ACTIVITY_ACTING_ON_A_GLYCOPROTEIN                    | 1.36 | 0.89 | 0 | 0 | 0 | not significant |
| 11561 | GO_PROTEIN_LIPID_COMPLEX                                          | 1.36 | 0.89 | 0 | 0 | 0 | not significant |
| 11562 | GO_REPLICATIVE_SENESCENCE                                         | 1.36 | 0.89 | 0 | 0 | 0 | not significant |
| 11563 | KYNG_DNA_DAMAGE_BY_4NQO_OR_GAMMA_RADIATION                        | 1.36 | 0.89 | 0 | 0 | 0 | not significant |
| 11564 | MARIADASON_RESPONSE_TO_BUTYRATE_CURCUMIN_SULINDAC_TSA_2           | 1.36 | 0.89 | 0 | 0 | 0 | not significant |
| 11565 | TERAMOTO_OPN_TARGETS_CLUSTER_1                                    | 1.36 | 0.89 | 0 | 0 | 0 | not significant |
| 11566 | FRASOR_RESPONSE_TO ESTRADIOL_UP                                   | 1.36 | 0.88 | 0 | 0 | 0 | not significant |
| 11567 | GO_EXTRACELLULAR_REGULATION_OF_SIGNAL_TRANSDUCTION                | 1.36 | 0.88 | 0 | 0 | 0 | not significant |
| 11568 | GO_L_SERINE_METABOLIC_PROCESS                                     | 1.36 | 0.88 | 0 | 0 | 0 | not significant |
| 11569 | TONKS_TARGETS_OF_RUNX1_RUNX1T1_FUSION_SUSTAINED_IN_MONOCYTE_UP    | 1.36 | 0.88 | 0 | 0 | 0 | not significant |
| 11570 | GO_NEGATIVE_REGULATION_OF_PROTEIN_EXT_FROM_ENDOPLASMIC_RETICULUM  | 1.36 | 0.87 | 0 | 0 | 0 | not significant |
| 11571 | GO_REGULATION_OF_STEM_CELL_DIVISION                               | 1.36 | 0.87 | 0 | 0 | 0 | not significant |
| 11572 | GO_QUATERNARY_AMMONIUM_GROUP_TRANSPORT                            | 1.36 | 0.86 | 0 | 0 | 0 | not significant |
| 11573 | GO_NEGATIVE_REGULATION_OF_CHOLESTEROL_STORAGE                     | 1.36 | 0.84 | 0 | 0 | 0 | not significant |
| 11574 | GO_RESPONSE_TO_NITROGEN_COMPOUND                                  | 1.37 | 2.92 | 0 | 0 | 0 | not significant |
| 11575 | BOQUEST_STEM_CELL_CULTURED_VS_FRESH_UP                            | 1.37 | 1.75 | 0 | 0 | 0 | not significant |
| 11576 | GO_RECEPTOR_COMPLEX                                               | 1.37 | 1.71 | 0 | 0 | 0 | not significant |
| 11577 | DOANE_RESPONSE_TO_ANDROGEN_DN                                     | 1.37 | 1.62 | 0 | 0 | 0 | not significant |
| 11578 | KASLER_HDAC7_TARGETS_1_UP                                         | 1.37 | 1.59 | 0 | 0 | 0 | not significant |
| 11579 | GO_GLYCOSYLATION                                                  | 1.37 | 1.56 | 0 | 0 | 0 | not significant |
| 11580 | LINDGREN_BLADDER_CANCER_CLUSTER_3_DN                              | 1.37 | 1.52 | 0 | 0 | 0 | not significant |
| 11581 | FOSTER_KDM1A_TARGETS_UP                                           | 1.37 | 1.37 | 0 | 0 | 0 | not significant |
| 11582 | PID_CXCR4_PATHWAY                                                 | 1.37 | 1.36 | 0 | 0 | 0 | not significant |
| 11583 | GO_INTERLEUKIN_6_PRODUCTION                                       | 1.37 | 1.3  | 0 | 0 | 0 | not significant |
| 11584 | GO_LIPID_STORAGE                                                  | 1.37 | 1.26 | 0 | 0 | 0 | not significant |
| 11585 | GO_CELLULAR_RESPONSE_TO_ANTIOTIC                                  | 1.37 | 1.24 | 0 | 0 | 0 | not significant |
| 11586 | GO_LIPOPROTEIN_BIOSYNTHETIC_PROCESS                               | 1.37 | 1.23 | 0 | 0 | 0 | not significant |
| 11587 | GO_PHAGOCYTTIC_VESICLE_MEMBRANE                                   | 1.37 | 1.21 | 0 | 0 | 0 | not significant |
| 11588 | GO_RESPONSE_TO_CAMP                                               | 1.37 | 1.21 | 0 | 0 | 0 | not significant |
| 11589 | NIELSEN_GIST                                                      | 1.37 | 1.2  | 0 | 0 | 0 | not significant |
| 11590 | ZHAN_MULTIPLE_MYELOMA_CD1_AND_CD2_UP                              | 1.37 | 1.2  | 0 | 0 | 0 | not significant |
| 11591 | GO_AMINOGLYCAN_METABOLIC_PROCESS                                  | 1.37 | 1.19 | 0 | 0 | 0 | not significant |
| 11592 | HOSHIDA_LIVER_CANCER_SURVIVAL_DN                                  | 1.37 | 1.19 | 0 | 0 | 0 | not significant |
| 11593 | ZHANG_TARGETS_OF_EWSR1_FL1_FUSION                                 | 1.37 | 1.19 | 0 | 0 | 0 | not significant |
| 11594 | MCBRYAN_PUBERTAL_BREAST_5_6WK_UP                                  | 1.37 | 1.18 | 0 | 0 | 0 | not significant |
| 11595 | SERVITJA_LIVER_HNF1A_TARGETS_DN                                   | 1.37 | 1.18 | 0 | 0 | 0 | not significant |
| 11596 | RASHI_RESPONSE_TO_IONIZING_RADIATION_6                            | 1.37 | 1.17 | 0 | 0 | 0 | not significant |
| 11597 | GO_RESPONSE_TO_BMP                                                | 1.37 | 1.15 | 0 | 0 | 0 | not significant |
| 11598 | GO_POSITIVE_REGULATION_OF_LYMPHOCYTE_DIFFERENTIATION              | 1.37 | 1.14 | 0 | 0 | 0 | not significant |
| 11599 | LAU_APOPTOSIS_CDKN2A_UP                                           | 1.37 | 1.13 | 0 | 0 | 0 | not significant |
| 11600 | GO_POSITIVE_REGULATION_OF_B_CELL_ACTIVATION                       | 1.37 | 1.09 | 0 | 0 | 0 | not significant |
| 11601 | KEGG_BIOSYNTHESIS_OF_UNSATURATED_FATTY_ACIDS                      | 1.37 | 1.09 | 0 | 0 | 0 | not significant |
| 11602 | VANTVEER_BREAST_CANCER_METASTASIS_UP                              | 1.37 | 1.07 | 0 | 0 | 0 | not significant |
| 11603 | GO_FATTY_ACID_DERIVATIVE_BIOSYNTHETIC_PROCESS                     | 1.37 | 1.04 | 0 | 0 | 0 | not significant |
| 11604 | GO_TRANSFORMING_GROWTH_FACTOR_BETA_PRODUCTION                     | 1.37 | 1.04 | 0 | 0 | 0 | not significant |
| 11605 | WANG_METHYLATED_IN_BREAST_CANCER                                  | 1.37 | 1.02 | 0 | 0 | 0 | not significant |
| 11606 | LIU_SMARCA4_TARGETS                                               | 1.37 | 1.01 | 0 | 0 | 0 | not significant |
| 11607 | BIOCARTA_PDGF_PATHWAY                                             | 1.37 | 1    | 0 | 0 | 0 | not significant |
| 11608 | REACTOME_COMPLEMENT_CASCADE                                       | 1.37 | 1    | 0 | 0 | 0 | not significant |
| 11609 | REACTOME_G1_S_SPECIFIC_TRANSCRIPTION                              | 1.37 | 1    | 0 | 0 | 0 | not significant |
| 11610 | BIOCARTA_IL6_PATHWAY                                              | 1.37 | 0.99 | 0 | 0 | 0 | not significant |
| 11611 | LEE_AGING_MUSCLE_UP                                               | 1.37 | 0.99 | 0 | 0 | 0 | not significant |
| 11612 | BIOCARTA_ARENRF2_PATHWAY                                          | 1.37 | 0.98 | 0 | 0 | 0 | not significant |
| 11613 | GO_GOLGI_LUMEN                                                    | 1.37 | 0.98 | 0 | 0 | 0 | not significant |
| 11614 | REACTOME_NAPLUS_CL_DEPENDENT_NEUROTRANSMITTER_TRANSPORTERS        | 1.37 | 0.98 | 0 | 0 | 0 | not significant |
| 11615 | GO_CELLULAR_MODIFIED_AMINO_ACID_CATABOLIC_PROCESS                 | 1.37 | 0.97 | 0 | 0 | 0 | not significant |
| 11616 | GO_IMMATURE_B_CELL_DIFFERENTIATION                                | 1.37 | 0.97 | 0 | 0 | 0 | not significant |
| 11617 | GO_PROTEIN_DEMANNOSYLATION                                        | 1.37 | 0.97 | 0 | 0 | 0 | not significant |
| 11618 | GO_EXOCRINE_SYSTEM_DEVELOPMENT                                    | 1.37 | 0.95 | 0 | 0 | 0 | not significant |
| 11619 | GO_EXPORT_ACROSS_PLASMA_MEMBRANE                                  | 1.37 | 0.95 | 0 | 0 | 0 | not significant |
| 11620 | GO_NEGATIVE_REGULATION_OF_CD4_POSITIVE_ALPHA_BETA_T_CELL_PROLIFER | 1.37 | 0.95 | 0 | 0 | 0 | not significant |
| 11621 | GO_POSITIVE_REGULATION_OF_B_CELL_MEDIATED_IMMUNITY                | 1.37 | 0.94 | 0 | 0 | 0 | not significant |
| 11622 | SCHIEDEREIT_IKK_TARGETS                                           | 1.37 | 0.94 | 0 | 0 | 0 | not significant |
| 11623 | GO_INHIBITORY_SYNAPSE_ASSEMBLY                                    | 1.37 | 0.93 | 0 | 0 | 0 | not significant |
| 11624 | GO_DNA_DAMAGE_INDUCED_PROTEIN_PHOSPHORYLATION                     | 1.37 | 0.92 | 0 | 0 | 0 | not significant |
| 11625 | GO_MISMATCH_REPAIR_COMPLEX_BINDING                                | 1.37 | 0.92 | 0 | 0 | 0 | not significant |
| 11626 | GO_SULFOTRANSFERASE_ACTIVITY                                      | 1.37 | 0.92 | 0 | 0 | 0 | not significant |
| 11627 | GO_CD8_POSITIVE_ALPHA_BETA_T_CELL_DIFFERENTIATION                 | 1.37 | 0.91 | 0 | 0 | 0 | not significant |
| 11628 | GO_GAMMA_SECRETASE_COMPLEX                                        | 1.37 | 0.91 | 0 | 0 | 0 | not significant |
| 11629 | MYLLYKANGAS_AMPLIFICATION_HOT_SPOT_5                              | 1.37 | 0.91 | 0 | 0 | 0 | not significant |
| 11630 | RICKMAN_HEAD_AND_NECK_CANCER_B                                    | 1.37 | 0.91 | 0 | 0 | 0 | not significant |
| 11631 | TONKS_TARGETS_OF_RUNX1_RUNX1T1_FUSION_SUSTAINED_IN GRANULOCYTE_U  | 1.37 | 0.91 | 0 | 0 | 0 | not significant |
| 11632 | GO_MESODERMAL_CELL_FATE_COMMITMENT                                | 1.37 | 0.9  | 0 | 0 | 0 | not significant |
| 11633 | GO_MUTSALPHA_COMPLEX_BINDING                                      | 1.37 | 0.9  | 0 | 0 | 0 | not significant |
| 11634 | SA_REG_CASCADE_OF_CYCLIN_EXPR                                     | 1.37 | 0.89 | 0 | 0 | 0 | not significant |
| 11635 | GO_VOLTAGE_GATED_SODIUM_CHANNEL_ACTIVITY                          | 1.37 | 0.88 | 0 | 0 | 0 | not significant |
| 11636 | GO_PROTEIN_POLYADP_RIBOSYLATION                                   | 1.37 | 0.87 | 0 | 0 | 0 | not significant |
| 11637 | REACTOME_REGULATED_PROTEOLYSIS_OF_P75NTR                          | 1.37 | 0.87 | 0 | 0 | 0 | not significant |
| 11638 | GO_NEGATIVE_REGULATION_OF_ANION_TRANSMEMBRANE_TRANSPORT           | 1.37 | 0.86 | 0 | 0 | 0 | not significant |
| 11639 | GO_RESPONSE_TO_FUNGICIDE                                          | 1.37 | 0.84 | 0 | 0 | 0 | not significant |
| 11640 | GO_INORGANIC_ION_TRANSMEMBRANE_TRANSPORT                          | 1.38 | 2.31 | 0 | 0 | 0 | not significant |
| 11641 | BENPORATH_SUZ12_TARGETS                                           | 1.38 | 2.07 | 0 | 0 | 0 | not significant |
| 11642 | BROWNE_HCMV_INFECTION_48HR_DN                                     | 1.38 | 1.95 | 0 | 0 | 0 | not significant |
| 11643 | BILD_HRAS_ONCOGENIC_SIGNALATURE                                   | 1.38 | 1.65 | 0 | 0 | 0 | not significant |
| 11644 | WANG_SMARCE1_TARGETS_UP                                           | 1.38 | 1.57 | 0 | 0 | 0 | not significant |
| 11645 | GO_POSITIVE_REGULATION_OF_LEUKOCYTE_CELL_CELL_ADHESION            | 1.38 | 1.56 | 0 | 0 | 0 | not significant |
| 11646 | GO_PRODUCTION_OF_MOLECULAR_MEDIATOR_OF_IMMUNE_RESPONSE            | 1.38 | 1.53 | 0 | 0 | 0 | not significant |
| 11647 | LANDIS_ERBB2_BREAST_TUMORS_324_UP                                 | 1.38 | 1.51 | 0 | 0 | 0 | not significant |
| 11648 | WAKABAYASHI_ADIPOGENESIS_PPARG_RXRA_BOUND_WITH_H4K20ME1_MARK      | 1.38 | 1.51 | 0 | 0 | 0 | not significant |
| 11649 | ATF2_S_UP_V1_DN                                                   | 1.38 | 1.46 | 0 | 0 | 0 | not significant |
| 11650 | STK33_SKM_DN                                                      | 1.38 | 1.46 | 0 | 0 | 0 | not significant |
| 11651 | GO_CARBOHYDRATE_BINDING                                           | 1.38 | 1.45 | 0 | 0 | 0 | not significant |

|       |                                                                    |      |      |   |   |   |                 |
|-------|--------------------------------------------------------------------|------|------|---|---|---|-----------------|
| 11652 | GO_SULFUR_COMPOUND_BIOSYNTHETIC_PROCESS                            | 1.38 | 1.43 | 0 | 0 | 0 | not significant |
| 11653 | AFFAR_Y1_TARGETS_UP                                                | 1.38 | 1.32 | 0 | 0 | 0 | not significant |
| 11654 | CHIANG_LIVER_CANCER_SUBCLASS_PROLIFERATION_DN                      | 1.38 | 1.29 | 0 | 0 | 0 | not significant |
| 11655 | WANG_ESOPHAGUS_CANCER_VS_NORMAL_UP                                 | 1.38 | 1.28 | 0 | 0 | 0 | not significant |
| 11656 | BECKER_TAMOXIFEN_RESISTANCE_UP                                     | 1.38 | 1.17 | 0 | 0 | 0 | not significant |
| 11657 | KRAS.LUNG.BREAST.UP.V1.UP                                          | 1.38 | 1.17 | 0 | 0 | 0 | not significant |
| 11658 | LIU_TARGETS_OF_VMYB_VS_CMYB_DN                                     | 1.38 | 1.14 | 0 | 0 | 0 | not significant |
| 11659 | GHANDH_BYSTANDER_IRRADIATION_UP                                    | 1.38 | 1.13 | 0 | 0 | 0 | not significant |
| 11660 | HAHTOLA_MYCOSIS_FUNGOIDES_CD4_UP                                   | 1.38 | 1.13 | 0 | 0 | 0 | not significant |
| 11661 | KRASNOSELSKAYA_ILF3_TARGETS_DN                                     | 1.38 | 1.12 | 0 | 0 | 0 | not significant |
| 11662 | SMID_BREAST_CANCER_RELAPSE_IN_BONE_UP                              | 1.38 | 1.1  | 0 | 0 | 0 | not significant |
| 11663 | SERVITJA_ISLET_HNF1A_TARGETS_DN                                    | 1.38 | 1.09 | 0 | 0 | 0 | not significant |
| 11664 | GO_MESENCHYMAL_CELL_PROLIFERATION                                  | 1.38 | 1.07 | 0 | 0 | 0 | not significant |
| 11665 | URS_ADIPOCYTE_DIFFERENTIATION_UP                                   | 1.38 | 1.07 | 0 | 0 | 0 | not significant |
| 11666 | GO_NEGATIVE_REGULATION_OF_T_CELL_MEDIATED_IMMUNITY                 | 1.38 | 1.05 | 0 | 0 | 0 | not significant |
| 11667 | GO_POSITIVE_REGULATION_OF_BONE_MINERALIZATION                      | 1.38 | 1.03 | 0 | 0 | 0 | not significant |
| 11668 | GO_POSITIVE_REGULATION_OF_OSTEOCLAST_DIFFERENTIATION               | 1.38 | 1.02 | 0 | 0 | 0 | not significant |
| 11669 | GO_REGULATION_OF_LIPOPOLYSACCHARIDE_MEDIATED_SIGNALING_PATHWAY     | 1.38 | 1.01 | 0 | 0 | 0 | not significant |
| 11670 | GO_SOLUTE_PROTON_SYMPORTER_ACTIVITY                                | 1.38 | 1    | 0 | 0 | 0 | not significant |
| 11671 | REACTOME_NOD1_2_SIGNALING_PATHWAY                                  | 1.38 | 1    | 0 | 0 | 0 | not significant |
| 11672 | BIOCARTA_CARDIACEGF_PATHWAY                                        | 1.38 | 0.99 | 0 | 0 | 0 | not significant |
| 11673 | DORN_ADENOVIRUS_INFECTION_48HR_DN                                  | 1.38 | 0.99 | 0 | 0 | 0 | not significant |
| 11674 | GO_LEUKOCYTE_ACTIVATION_INVOLVED_IN_INFLAMMATORY_RESPONSE          | 1.38 | 0.99 | 0 | 0 | 0 | not significant |
| 11675 | GO_SHORT_CHAIN_FATTY_ACID_CATABOLIC_PROCESS                        | 1.38 | 0.99 | 0 | 0 | 0 | not significant |
| 11676 | GO_VACUOLAR_PROTON_TRANSPORTING_V_TYPE_ATPASE_COMPLEX              | 1.38 | 0.99 | 0 | 0 | 0 | not significant |
| 11677 | GO_BILE_ACID_METABOLIC_PROCESS                                     | 1.38 | 0.98 | 0 | 0 | 0 | not significant |
| 11678 | GO_RENAL_SYSTEM_PROCESS_INVOLVED_IN_REGULATION_OF_SYSTEMIC_ARTEF   | 1.38 | 0.98 | 0 | 0 | 0 | not significant |
| 11679 | GO_RESPONSE_TO_INTERLEUKIN_15                                      | 1.38 | 0.98 | 0 | 0 | 0 | not significant |
| 11680 | HUPER_BREAST_BASAL_VS_LUMINAL_UP                                   | 1.38 | 0.98 | 0 | 0 | 0 | not significant |
| 11681 | NAKAJIMA_MAST_CELL                                                 | 1.38 | 0.98 | 0 | 0 | 0 | not significant |
| 11682 | PID_INTEGRIN_A9B1_PATHWAY                                          | 1.38 | 0.98 | 0 | 0 | 0 | not significant |
| 11683 | BIOCARTA_TNFR2_PATHWAY                                             | 1.38 | 0.97 | 0 | 0 | 0 | not significant |
| 11684 | GO_NEUTROPHIL_HOMEOSTASIS                                          | 1.38 | 0.97 | 0 | 0 | 0 | not significant |
| 11685 | GO_POSITIVE_REGULATION_OF_T_CELL_MIGRATION                         | 1.38 | 0.97 | 0 | 0 | 0 | not significant |
| 11686 | GO_REGULATION_OF_SYNAPTIC_TRANSMISSION_GlutAMATERGIC               | 1.38 | 0.97 | 0 | 0 | 0 | not significant |
| 11687 | GO_SODIUM_BICARBONATE_SYMPORTER_ACTIVITY                           | 1.38 | 0.97 | 0 | 0 | 0 | not significant |
| 11688 | GO_TOLL_LIKE_RECEPTOR_3_SIGNALING_PATHWAY                          | 1.38 | 0.97 | 0 | 0 | 0 | not significant |
| 11689 | REACTOME_DEFECTS_IN_COBALAMIN_B12_METABOLISM                       | 1.38 | 0.97 | 0 | 0 | 0 | not significant |
| 11690 | MEISSNER_NPC_HCP_WITH_H3K27ME3                                     | 1.38 | 0.96 | 0 | 0 | 0 | not significant |
| 11691 | BIOCARTA GRANULOCYTES_PATHWAY                                      | 1.38 | 0.95 | 0 | 0 | 0 | not significant |
| 11692 | GAUSSMANN_MLL_AF4_FUSION_TARGETS_D_DN                              | 1.38 | 0.95 | 0 | 0 | 0 | not significant |
| 11693 | GO_NEGATIVE_REGULATION_OF_BEHAVIOR                                 | 1.38 | 0.95 | 0 | 0 | 0 | not significant |
| 11694 | GO_NOTCH_RECEPTOR_PROCESSING_LIGAND_DEPENDENT                      | 1.38 | 0.95 | 0 | 0 | 0 | not significant |
| 11695 | GO_ORGAN_INDUCTION                                                 | 1.38 | 0.95 | 0 | 0 | 0 | not significant |
| 11696 | GO_POSITIVE_REGULATION_OF_HISTONE_H3_K9_ACETYLATION                | 1.38 | 0.95 | 0 | 0 | 0 | not significant |
| 11697 | CHEMELLO_SOLEUS_VS_EDL_MYOFIBERS_UP                                | 1.38 | 0.92 | 0 | 0 | 0 | not significant |
| 11698 | GO_HIPPOCAMPAL_MOSSY_FIBER_TO_CA3_SYNAPSE                          | 1.38 | 0.89 | 0 | 0 | 0 | not significant |
| 11699 | GO_MAST_CELL_MIGRATION                                             | 1.38 | 0.89 | 0 | 0 | 0 | not significant |
| 11700 | HERNANDEZ_ABERRANT_MITOSIS_BY_DOCETACEL_4NM_UP                     | 1.38 | 0.88 | 0 | 0 | 0 | not significant |
| 11701 | GO_GOLGI_MEMBRANE                                                  | 1.39 | 4    | 0 | 0 | 0 | not significant |
| 11702 | MTOR_UP.N4.V1.UP                                                   | 1.39 | 2.02 | 0 | 0 | 0 | not significant |
| 11703 | GO_RESPONSE_TO_TOXIC_SUBSTANCE                                     | 1.39 | 1.99 | 0 | 0 | 0 | not significant |
| 11704 | GO_PLASMA_MEMBRANE_PROTEIN_COMPLEX                                 | 1.39 | 1.95 | 0 | 0 | 0 | not significant |
| 11705 | GO_POSITIVE_REGULATION_OF_SECRETION                                | 1.39 | 1.77 | 0 | 0 | 0 | not significant |
| 11706 | GO_LIPID_LOCALIZATION                                              | 1.39 | 1.73 | 0 | 0 | 0 | not significant |
| 11707 | RIGGI_EWING_SARCOMA_PROGENITOR_UP                                  | 1.39 | 1.71 | 0 | 0 | 0 | not significant |
| 11708 | GO_TISSUE_MIGRATION                                                | 1.39 | 1.52 | 0 | 0 | 0 | not significant |
| 11709 | NING_CHRONIC_OBSTRUCTIVE_PULMONARY_DISEASE_UP                      | 1.39 | 1.52 | 0 | 0 | 0 | not significant |
| 11710 | SHEDDEN_LUNG_CANCER_GOOD_SURVIVAL_A4                               | 1.39 | 1.52 | 0 | 0 | 0 | not significant |
| 11711 | GO_CATION_CHANNEL_ACTIVITY                                         | 1.39 | 1.51 | 0 | 0 | 0 | not significant |
| 11712 | REACTOME_SRP_DEPENDENT_COTRANSLATIONAL_PROTEIN_TARGETING_TO_MEI    | 1.39 | 1.51 | 0 | 0 | 0 | not significant |
| 11713 | RB_DNV1_UP                                                         | 1.39 | 1.46 | 0 | 0 | 0 | not significant |
| 11714 | GO_RECOMBINATIONAL_REPAIR                                          | 1.39 | 1.44 | 0 | 0 | 0 | not significant |
| 11715 | PTEN_DNV2_DN                                                       | 1.39 | 1.41 | 0 | 0 | 0 | not significant |
| 11716 | HOFFMANN_SMALL_PRE_BIL_TO_IMMATURE_B_LYMPHOCYTE_UP                 | 1.39 | 1.33 | 0 | 0 | 0 | not significant |
| 11717 | GO_UDP_GLYCOSYLTRANSFERASE_ACTIVITY                                | 1.39 | 1.3  | 0 | 0 | 0 | not significant |
| 11718 | GO_RESPONSE_TO_TYPE_I_INTERFERON                                   | 1.39 | 1.27 | 0 | 0 | 0 | not significant |
| 11719 | GO_MYOTUBE_DIFFERENTIATION                                         | 1.39 | 1.26 | 0 | 0 | 0 | not significant |
| 11720 | FERREIRA_EWINGS_SARCOMA_UNSTABLE_VS_STABLE_DN                      | 1.39 | 1.24 | 0 | 0 | 0 | not significant |
| 11721 | ROPERO_HDAC2_TARGETS                                               | 1.39 | 1.22 | 0 | 0 | 0 | not significant |
| 11722 | GO_EAR_MORPHOGENESIS                                               | 1.39 | 1.21 | 0 | 0 | 0 | not significant |
| 11723 | BROWNE_INTERFERON_RESPONSIVE_GENES                                 | 1.39 | 1.19 | 0 | 0 | 0 | not significant |
| 11724 | CROMER_METASTASIS_UP                                               | 1.39 | 1.19 | 0 | 0 | 0 | not significant |
| 11725 | GO_GLYCOLIPID_BIOSYNTHETIC_PROCESS                                 | 1.39 | 1.17 | 0 | 0 | 0 | not significant |
| 11726 | GO_NUCLEAR_DNA_REPLICATION                                         | 1.39 | 1.17 | 0 | 0 | 0 | not significant |
| 11727 | LEE_NEURAL_CREST_STEM_CELL_UP                                      | 1.39 | 1.15 | 0 | 0 | 0 | not significant |
| 11728 | PEDERSEN_TARGETS_OF_611CTF_ISOFORM_OF_ERBB2                        | 1.39 | 1.13 | 0 | 0 | 0 | not significant |
| 11729 | GO_PEPTIDE_RECEPTOR_ACTIVITY                                       | 1.39 | 1.12 | 0 | 0 | 0 | not significant |
| 11730 | GO_TELOMERE_MAINTENANCE_VIA_SEMI_CONSERVATIVE_REPLICATION          | 1.39 | 1.12 | 0 | 0 | 0 | not significant |
| 11731 | REACTOME_MAPK_TARGETS_NUCLEAR_EVENTS_MEDIATED_BY_MAP_KINASES       | 1.39 | 1.12 | 0 | 0 | 0 | not significant |
| 11732 | GO_GLYCEROLIPID_CATABOLIC_PROCESS                                  | 1.39 | 1.11 | 0 | 0 | 0 | not significant |
| 11733 | GEISS_RESPONSE_TO_DSRNA_UP                                         | 1.39 | 1.09 | 0 | 0 | 0 | not significant |
| 11734 | REACTOME_REGULATION_OF_INSULIN_LIKE_GROWTH_FACTOR_IGF_TRANSPORT_   | 1.39 | 1.09 | 0 | 0 | 0 | not significant |
| 11735 | GO_SULFUR_COMPOUND_CATABOLIC_PROCESS                               | 1.39 | 1.07 | 0 | 0 | 0 | not significant |
| 11736 | GO_NEGATIVE_REGULATION_OF_CHEMOKINE_PRODUCTION                     | 1.39 | 1.05 | 0 | 0 | 0 | not significant |
| 11737 | GARGALOVIC_RESPONSE_TO_OXIDIZED_PHOSPHOLIPIDS_LIGHTGREEN_DN        | 1.39 | 1.04 | 0 | 0 | 0 | not significant |
| 11738 | REACTOME_ASSEMBLY_OF_ACTIVE_LPL_AND_LIPC_LIPASE_COMPLEXES          | 1.39 | 1.04 | 0 | 0 | 0 | not significant |
| 11739 | REACTOME_DEFECTIVE_EXT2_CAUSES_EXOSTOSES_2                         | 1.39 | 1.04 | 0 | 0 | 0 | not significant |
| 11740 | GO_REELIN_MEDIATED_SIGNALING_PATHWAY                               | 1.39 | 1.03 | 0 | 0 | 0 | not significant |
| 11741 | GO_CD4_POSITIVE_OR_CD8_POSITIVE_ALPHA_BETA_T_CELL_LINEAGE_COMMITMI | 1.39 | 1.02 | 0 | 0 | 0 | not significant |
| 11742 | GO_PHAGOCYTI_CUP                                                   | 1.39 | 1.02 | 0 | 0 | 0 | not significant |
| 11743 | REACTOME_PLASMA_LIPOPROTEIN_REMODELING                             | 1.39 | 1.02 | 0 | 0 | 0 | not significant |
| 11744 | FLECHNER_BIOPSY_KIDNEY_TRANSPLANT_OK_VS_DONOR_DN                   | 1.39 | 1.01 | 0 | 0 | 0 | not significant |
| 11745 | GO_INFLAMMATORY_RESPONSE_TO_WOUNDING                               | 1.39 | 1.01 | 0 | 0 | 0 | not significant |
| 11746 | GO_PRE_B_CELL_DIFFERENTIATION                                      | 1.39 | 1.01 | 0 | 0 | 0 | not significant |
| 11747 | GO_POTASSIUM_CHLORIDE_SYMPORTER_ACTIVITY                           | 1.39 | 1    | 0 | 0 | 0 | not significant |
| 11748 | PID_UPA_UPAR_PATHWAY                                               | 1.39 | 1    | 0 | 0 | 0 | not significant |
| 11749 | FONTAINE_THYROID_TUMOR_UNCERTAIN_MALIGNANCY_DN                     | 1.39 | 0.99 | 0 | 0 | 0 | not significant |
| 11750 | GO_DNA_CLAMP_LOADER_ACTIVITY                                       | 1.39 | 0.99 | 0 | 0 | 0 | not significant |
| 11751 | REACTOME_SIGNALING_BY_NODAL                                        | 1.39 | 0.99 | 0 | 0 | 0 | not significant |
| 11752 | GO_NEGATIVE_REGULATION_OF_CYTOKINE_PRODUCTION_INVOLVED_IN_IMMUNE   | 1.39 | 0.98 | 0 | 0 | 0 | not significant |
| 11753 | GO_ORGANIC_CATION_TRANSMEMBRANE_TRANSPORTER_ACTIVITY               | 1.39 | 0.98 | 0 | 0 | 0 | not significant |
| 11754 | GO_IMMUNOLOGICAL_MEMORY_FORMATION_PROCESS                          | 1.39 | 0.97 | 0 | 0 | 0 | not significant |
| 11755 | GO_NEGATIVE_REGULATION_OF_THYMOCYTE_APOPTOTIC_PROCESS              | 1.39 | 0.97 | 0 | 0 | 0 | not significant |
| 11756 | GO_NEURON_PROJECTION_EXTENSION_INVOLVED_IN_NEURON_PROJECTION_GUID  | 1.39 | 0.97 | 0 | 0 | 0 | not significant |
| 11757 | GO_PLASMA_MEMBRANE_PHOSPHOLIPID_SCRAMBLING                         | 1.39 | 0.97 | 0 | 0 | 0 | not significant |
| 11758 | GO_REGULATION_OF_INORGANIC_ANION_TRANSMEMBRANE_TRANSPORT           | 1.39 | 0.97 | 0 | 0 | 0 | not significant |
| 11759 | GO_TETRAHYDROBIOPTERIN_BIOSYNTHETIC_PROCESS                        | 1.39 | 0.95 | 0 | 0 | 0 | not significant |
| 11760 | MAHADEVAN_RESPONSE_TO_MP470_DN                                     | 1.39 | 0.95 | 0 | 0 | 0 | not significant |



|       |                                                                     |      |      |   |   |   |                 |
|-------|---------------------------------------------------------------------|------|------|---|---|---|-----------------|
| 11761 | DARWICHE_PAPILLOMA_RISK_HIGH_VS_LOW_UP                              | 1.39 | 0.93 | 0 | 0 | 0 | not significant |
| 11762 | GO_COBALAMIN_TRANSPORT                                              | 1.39 | 0.93 | 0 | 0 | 0 | not significant |
| 11763 | GO_CARDIAC_EPITHELIAL_TO_MESENCHYMAL_TRANSITION                     | 1.39 | 0.92 | 0 | 0 | 0 | not significant |
| 11764 | GO_POSITIVE_REGULATION_OF_FATTY_ACID_METABOLIC_PROCESS              | 1.39 | 0.92 | 0 | 0 | 0 | not significant |
| 11765 | GO_LUNG_CELL_DIFFERENTIATION                                        | 1.39 | 0.91 | 0 | 0 | 0 | not significant |
| 11766 | GO_ANTIGEN_PROCESSING_AND_PRESENTATION_OF_LIPID_ANTIGEN_VIA_MHC_CL  | 1.39 | 0.89 | 0 | 0 | 0 | not significant |
| 11767 | GO_POLE_PLASM                                                       | 1.39 | 0.85 | 0 | 0 | 0 | not significant |
| 11768 | LEI_HOXC8_TARGETS_UP                                                | 1.39 | 0.84 | 0 | 0 | 0 | not significant |
| 11769 | GO_CELLULAR_RESPONSE_TO_LIPID                                       | 1.40 | 2.21 | 0 | 0 | 0 | not significant |
| 11770 | GOZG1T_ESR1_TARGETS_DN                                              | 1.40 | 2.03 | 0 | 0 | 0 | not significant |
| 11771 | HALLMARK_ALLOGRAFT_REJECTION                                        | 1.40 | 1.7  | 0 | 0 | 0 | not significant |
| 11772 | KIM_WT1_TARGETS_UP                                                  | 1.40 | 1.7  | 0 | 0 | 0 | not significant |
| 11773 | MIYAGAWA_TARGETS_OF_EWSR1_ETS_FUSIONS_UP                            | 1.40 | 1.7  | 0 | 0 | 0 | not significant |
| 11774 | HALLMARK_HEME_METABOLISM                                            | 1.40 | 1.64 | 0 | 0 | 0 | not significant |
| 11775 | HOXA9_DN.V1_UP                                                      | 1.40 | 1.64 | 0 | 0 | 0 | not significant |
| 11776 | HALLMARK_INTERFERON_GAMMA_RESPONSE                                  | 1.40 | 1.62 | 0 | 0 | 0 | not significant |
| 11777 | GO_POSITIVE_REGULATION_OF_IMMUNE_EFFECTOR_PROCESS                   | 1.40 | 1.58 | 0 | 0 | 0 | not significant |
| 11778 | GO_AZUROPHIL_GROANULE                                               | 1.40 | 1.53 | 0 | 0 | 0 | not significant |
| 11779 | GO_RESPONSE_TO_ALCOHOL                                              | 1.40 | 1.5  | 0 | 0 | 0 | not significant |
| 11780 | GO_PROTEIN_PROCESSING                                               | 1.40 | 1.48 | 0 | 0 | 0 | not significant |
| 11781 | CHR16P11                                                            | 1.40 | 1.44 | 0 | 0 | 0 | not significant |
| 11782 | REACTOME_P13K_AKT_SIGNALING_IN_CANCER                               | 1.40 | 1.41 | 0 | 0 | 0 | not significant |
| 11783 | JOHNSTONE_PARVB_TARGETS_2_UP                                        | 1.40 | 1.38 | 0 | 0 | 0 | not significant |
| 11784 | HECKER_IFNB1_TARGETS                                                | 1.40 | 1.28 | 0 | 0 | 0 | not significant |
| 11785 | DACOSTA_UV_RESPONSE_VIA_ERCC3_COMMON_UP                             | 1.40 | 1.25 | 0 | 0 | 0 | not significant |
| 11786 | FAELT_B_CLL_WITH_VH_REARRANGEMENTS_UP                               | 1.40 | 1.24 | 0 | 0 | 0 | not significant |
| 11787 | GO_CELLULAR_RESPONSE_TO_CORTICOSTEROID_STIMULUS                     | 1.40 | 1.22 | 0 | 0 | 0 | not significant |
| 11788 | GO_INTEGRIN_BINDING                                                 | 1.40 | 1.22 | 0 | 0 | 0 | not significant |
| 11789 | PENG_Glutamine_Deprivation_UP                                       | 1.40 | 1.22 | 0 | 0 | 0 | not significant |
| 11790 | REACTOME_GLYCOSAMINOGLYCAN_METABOLISM                               | 1.40 | 1.22 | 0 | 0 | 0 | not significant |
| 11791 | GO_ICOSANOID_METABOLIC_PROCESS                                      | 1.40 | 1.19 | 0 | 0 | 0 | not significant |
| 11792 | FRASOR_RESPONSE_TO ESTRADIOL_DN                                     | 1.40 | 1.18 | 0 | 0 | 0 | not significant |
| 11793 | MAYBURD_RESPONSE_TO_L663536_UP                                      | 1.40 | 1.18 | 0 | 0 | 0 | not significant |
| 11794 | GO_PROTEIN_ADP_RIBOSYLATION                                         | 1.40 | 1.15 | 0 | 0 | 0 | not significant |
| 11795 | GO_UNSATURATED_FATTY_ACID_BIOSYNTHETIC_PROCESS                      | 1.40 | 1.15 | 0 | 0 | 0 | not significant |
| 11796 | GO_P38MAPK_CASCADE                                                  | 1.40 | 1.11 | 0 | 0 | 0 | not significant |
| 11797 | GO_ATP_GATED_ION_CHANNEL_ACTIVITY                                   | 1.40 | 1.1  | 0 | 0 | 0 | not significant |
| 11798 | GO_CELL_VOLUME_HOMEOSTASIS                                          | 1.40 | 1.09 | 0 | 0 | 0 | not significant |
| 11799 | GO DOUBLE STRAND BREAK REPAIR VIA SYNTHESIS DEPENDENT STRAND ANN    | 1.40 | 1.09 | 0 | 0 | 0 | not significant |
| 11800 | MIKKELSEN_MCV6_ICP_WITH_H3K27ME3                                    | 1.40 | 1.09 | 0 | 0 | 0 | not significant |
| 11801 | GO_INTRINSIC_COMPONENT_OF_PRESYNAPTIC_MEMBRANE                      | 1.40 | 1.08 | 0 | 0 | 0 | not significant |
| 11802 | REACTOME_ACTIVATION_OF_THE_PRE_REPLICATIVE_COMPLEX                  | 1.40 | 1.08 | 0 | 0 | 0 | not significant |
| 11803 | REACTOME_HDR_THROUGH_SINGLE_STRAND_ANNEALING_SSA                    | 1.40 | 1.08 | 0 | 0 | 0 | not significant |
| 11804 | SHIN_B_CELL_LYMPHOMA_CLUSTER_2                                      | 1.40 | 1.07 | 0 | 0 | 0 | not significant |
| 11805 | CHR6Q15                                                             | 1.40 | 1.06 | 0 | 0 | 0 | not significant |
| 11806 | GO_NEGATIVE_REGULATION_OF_ENDOTHELIAL_CELL_APOPTOTIC_PROCESS        | 1.40 | 1.06 | 0 | 0 | 0 | not significant |
| 11807 | GO_NOTCH_RECEPTOR_PROCESSING                                        | 1.40 | 1.06 | 0 | 0 | 0 | not significant |
| 11808 | BERENIENO_TRANSFORMED_BY_RHOA_FOREVER_UP                            | 1.40 | 1.04 | 0 | 0 | 0 | not significant |
| 11809 | GO_ALANINE_TRANSPORT                                                | 1.40 | 1.04 | 0 | 0 | 0 | not significant |
| 11810 | GO_POSITIVE_REGULATION_OF_FATTY_ACID_BETA_OXIDATION                 | 1.40 | 1.04 | 0 | 0 | 0 | not significant |
| 11811 | GO_TUMOR_NECROSIS_FACTOR_ACTIVATED_RECEPTOR_ACTIVITY                | 1.40 | 1.04 | 0 | 0 | 0 | not significant |
| 11812 | KORKOLA_EMBRYONIC_CARCINOMA_VS_SEMINOMA_DN                          | 1.40 | 1.03 | 0 | 0 | 0 | not significant |
| 11813 | GO_STRAND_INVASION                                                  | 1.40 | 1.02 | 0 | 0 | 0 | not significant |
| 11814 | REACTOME_SUMOYLATION_OF_IMMUNE_RESPONSE_PROTEINS                    | 1.40 | 1.02 | 0 | 0 | 0 | not significant |
| 11815 | GO_RESPONSE_TO_MUSCLE_STRETCH                                       | 1.40 | 1.01 | 0 | 0 | 0 | not significant |
| 11816 | GO_TRANSFERASE_ACTIVITY_TRANSFERRING_AMINO_ACYL_GROUPS              | 1.40 | 1.01 | 0 | 0 | 0 | not significant |
| 11817 | GROSS_HYPOXIA_VIA_HIF1A_ONLY                                        | 1.40 | 1.01 | 0 | 0 | 0 | not significant |
| 11818 | KIM_ALL_DISORDERS_CALB1_CORR_DN                                     | 1.40 | 1.01 | 0 | 0 | 0 | not significant |
| 11819 | GO_MKS_COMPLEX                                                      | 1.40 | 1    | 0 | 0 | 0 | not significant |
| 11820 | GO_CELLULAR_RESPONSE_TO_MURAMYL_DIPEPTIDE                           | 1.40 | 0.99 | 0 | 0 | 0 | not significant |
| 11821 | GO_GALACTOSE_CATABOLIC_PROCESS_VIA_UDP_GALACTOSE                    | 1.40 | 0.99 | 0 | 0 | 0 | not significant |
| 11822 | NEWMAN_ERCC6_TARGETS_UP                                             | 1.40 | 0.99 | 0 | 0 | 0 | not significant |
| 11823 | GO_ACTIVATION_OF_PHOSPHOLIPASE_C_ACTIVITY                           | 1.40 | 0.98 | 0 | 0 | 0 | not significant |
| 11824 | GO_DEATH_RECEPTOR_ACTIVITY                                          | 1.40 | 0.98 | 0 | 0 | 0 | not significant |
| 11825 | GO_REGULATION_OF_EXCITATORY_SYNAPSE_ASSEMBLY                        | 1.40 | 0.98 | 0 | 0 | 0 | not significant |
| 11826 | GO_NEGATIVE_REGULATION_OF_LIPID_CATABOLIC_PROCESS                   | 1.40 | 0.96 | 0 | 0 | 0 | not significant |
| 11827 | KIM_GLI32_TARGETS_DN                                                | 1.40 | 0.94 | 0 | 0 | 0 | not significant |
| 11828 | GO_SIGNAL_COMPLEX_ASSEMBLY                                          | 1.40 | 0.89 | 0 | 0 | 0 | not significant |
| 11829 | GO_GOLGI_APPARATUS_PART                                             | 1.41 | 4    | 0 | 0 | 0 | not significant |
| 11830 | GO_BLOOD_VESSEL_MORPHOGENESIS                                       | 1.41 | 2.42 | 0 | 0 | 0 | not significant |
| 11831 | GO_CELLULAR_RESPONSE_TO_PEPTIDE                                     | 1.41 | 2.41 | 0 | 0 | 0 | not significant |
| 11832 | GO_RESPONSE_TO_PEPTIDE                                              | 1.41 | 2.21 | 0 | 0 | 0 | not significant |
| 11833 | GO_REGULATION_OF_IMMUNE_EFFECTOR_PROCESS                            | 1.41 | 2.19 | 0 | 0 | 0 | not significant |
| 11834 | BENPORATH_EED_TARGETS                                               | 1.41 | 2.02 | 0 | 0 | 0 | not significant |
| 11835 | HADDAD_B_LYMPHOCYTE_PROGENITOR                                      | 1.41 | 1.86 | 0 | 0 | 0 | not significant |
| 11836 | GO_REGULATION_OF_CELL_CELL_ADHESION                                 | 1.41 | 1.85 | 0 | 0 | 0 | not significant |
| 11837 | RUTELLA_RESPONSE_TO_HGF_VS_CSF2RB_AND_IL4_DN                        | 1.41 | 1.82 | 0 | 0 | 0 | not significant |
| 11838 | IVANOVA_HEMATOPOIESIS_STEM_CELL                                     | 1.41 | 1.59 | 0 | 0 | 0 | not significant |
| 11839 | GO_ALPHA_AMINO_ACID_METABOLIC_PROCESS                               | 1.41 | 1.58 | 0 | 0 | 0 | not significant |
| 11840 | CHIARADONNA_NEOPLASTIC_TRANSFORMATION_CDC25_DN                      | 1.41 | 1.47 | 0 | 0 | 0 | not significant |
| 11841 | GO_COLLAGEN_CONTAINING_EXTRACELLULAR_MATRIX                         | 1.41 | 1.45 | 0 | 0 | 0 | not significant |
| 11842 | GO_CELLULAR_MONOVALENT_INORGANIC_CATION_HOMEOSTASIS                 | 1.41 | 1.39 | 0 | 0 | 0 | not significant |
| 11843 | REACTOME_CELL_SURFACE_INTERACTIONS_AT_THE_VASCULAR_WALL             | 1.41 | 1.37 | 0 | 0 | 0 | not significant |
| 11844 | REACTOME_NUCLEOTIDE_BINDING_DOMAIN_LEUCINE_RICH_REPEAT_CONTAINING   | 1.41 | 1.36 | 0 | 0 | 0 | not significant |
| 11845 | BIOCARTA_IL2RB_PATHWAY                                              | 1.41 | 1.28 | 0 | 0 | 0 | not significant |
| 11846 | GO_NEUTRAL_LIPID_METABOLIC_PROCESS                                  | 1.41 | 1.28 | 0 | 0 | 0 | not significant |
| 11847 | ELVIDGE_HIF1A_AND_HIF2A_TARGETS_DN                                  | 1.41 | 1.27 | 0 | 0 | 0 | not significant |
| 11848 | HERNANDEZ_ABERRANT_MITOSIS_BY_DOCETACEL_2NM_UP                      | 1.41 | 1.21 | 0 | 0 | 0 | not significant |
| 11849 | REACTOME_REGULATION_OF_CHOLESTEROL_BIOSYNTHESIS_BY_SREBP_SREBF      | 1.41 | 1.2  | 0 | 0 | 0 | not significant |
| 11850 | GO_ION_ANTIPORTER_ACTIVITY                                          | 1.41 | 1.15 | 0 | 0 | 0 | not significant |
| 11851 | GO_POSITIVE_T_CELL_SELECTION                                        | 1.41 | 1.14 | 0 | 0 | 0 | not significant |
| 11852 | GO_ADENYLATE_CYCLASE_ACTIVATING_G_PROTEIN_COUPLED_RECEPTOR_SIGN     | 1.41 | 1.13 | 0 | 0 | 0 | not significant |
| 11853 | GO_EXTRACELLULAR_MATRIX_DISASSEMBLY                                 | 1.41 | 1.11 | 0 | 0 | 0 | not significant |
| 11854 | GO_INFLAMMATORY_RESPONSE_TO_ANTIAGENIC_STIMULUS                     | 1.41 | 1.11 | 0 | 0 | 0 | not significant |
| 11855 | GO_NEGATIVE_REGULATION_OF_T_CELL_PROLIFERATION                      | 1.41 | 1.11 | 0 | 0 | 0 | not significant |
| 11856 | GO_REGULATION_OF_CD40_SIGNALING_PATHWAY                             | 1.41 | 1.11 | 0 | 0 | 0 | not significant |
| 11857 | GO_RESPONSE_TO_ZINC_ION                                             | 1.41 | 1.11 | 0 | 0 | 0 | not significant |
| 11858 | PID_IL23_PATHWAY                                                    | 1.41 | 1.11 | 0 | 0 | 0 | not significant |
| 11859 | REACTOME_INTERLEUKIN_15_SIGNALING                                   | 1.41 | 1.11 | 0 | 0 | 0 | not significant |
| 11860 | VALK_AML_CLUSTER_12                                                 | 1.41 | 1.1  | 0 | 0 | 0 | not significant |
| 11861 | GO_NEUROTRANSMITTER_SODIUM_SYMPORTER_ACTIVITY                       | 1.41 | 1.09 | 0 | 0 | 0 | not significant |
| 11862 | GO_RECEPTOR_RECYCLING                                               | 1.41 | 1.09 | 0 | 0 | 0 | not significant |
| 11863 | GO_3_5_EXODEOXYRIBONUCLEASE_ACTIVITY                                | 1.41 | 1.08 | 0 | 0 | 0 | not significant |
| 11864 | GO_REGULATION_OF_NEURON_PROJECTION_ARBORIZATION                     | 1.41 | 1.08 | 0 | 0 | 0 | not significant |
| 11865 | REACTOME_N_GLYCAN_ANTENNAE_ELONGATION_IN_THE_MEDIAL_TRANS_GOLGI     | 1.41 | 1.07 | 0 | 0 | 0 | not significant |
| 11866 | REACTOME_SYNTHESIS_SECRETION_AND_DEACYLATION_OF_GHRELIN             | 1.41 | 1.07 | 0 | 0 | 0 | not significant |
| 11867 | GO_INTERLEUKIN_12_SECRETION                                         | 1.41 | 1.06 | 0 | 0 | 0 | not significant |
| 11868 | GO_NUCLEOTIDE_BINDING_OLIGOMERIZATION_DOMAIN_CONTAINING_2_SIGNALING | 1.41 | 1.06 | 0 | 0 | 0 | not significant |
| 11869 | REACTOME_INTERLEUKIN_2_SIGNALING                                    | 1.41 | 1.06 | 0 | 0 | 0 | not significant |

|       |                                                                                           |      |      |   |   |   |                 |
|-------|-------------------------------------------------------------------------------------------|------|------|---|---|---|-----------------|
| 11870 | GO_NEGATIVE_REGULATION_OF_NATURAL_KILLER_CELL_MEDIATED_IMMUNITY                           | 1.41 | 1.05 | 0 | 0 | 0 | not significant |
| 11871 | GO_POSITIVE_REGULATION_OF_INTERLEUKIN_1_SECRETION                                         | 1.41 | 1.05 | 0 | 0 | 0 | not significant |
| 11872 | GO_POSITIVE_REGULATION_OF_TOLL_LIKE_RECEPTOR_2_SIGNALING_PATHWAY                          | 1.41 | 1.05 | 0 | 0 | 0 | not significant |
| 11873 | GO_REGULATION_OF_CELLULAR_RESPONSE_TO_VASCULAR_ENDOTHELIAL_GROWTH_FACTOR                  | 1.41 | 1.05 | 0 | 0 | 0 | not significant |
| 11874 | GO_SIGNAL_PEPTIDE_PROCESSING                                                              | 1.41 | 1.04 | 0 | 0 | 0 | not significant |
| 11875 | OUYANG_PROSTATE_CANCER_PROGRESSION_UP                                                     | 1.41 | 1.04 | 0 | 0 | 0 | not significant |
| 11876 | GO_RESPONSE_TO_IMMOBILIZATION_STRESS                                                      | 1.41 | 1.03 | 0 | 0 | 0 | not significant |
| 11877 | BIOCARTA_FBW7_PATHWAY                                                                     | 1.41 | 1.02 | 0 | 0 | 0 | not significant |
| 11878 | GO_POSITIVE_REGULATION_OF_GLYCOGEN_METABOLIC_PROCESS                                      | 1.41 | 1.02 | 0 | 0 | 0 | not significant |
| 11879 | GO_REGULATION_OF_RENAL_SYSTEM_PROCESS                                                     | 1.41 | 1.02 | 0 | 0 | 0 | not significant |
| 11880 | GO_LOW_DENSITY_LIPOPROTEIN_PARTICLE                                                       | 1.41 | 1.01 | 0 | 0 | 0 | not significant |
| 11881 | GO_POSITIVE_REGULATION_OF_GLUCOSE_METABOLIC_PROCESS                                       | 1.41 | 1.01 | 0 | 0 | 0 | not significant |
| 11882 | GO_NEGATIVE_REGULATION_OF_INSULIN_SECRETION_INVOLVED_IN_CELLULAR_RESPONSE_TO_HYPERTENSION | 1.41 | 1    | 0 | 0 | 0 | not significant |
| 11883 | ZIRN_TRETINOIN_RESPONSE_UP                                                                | 1.41 | 0.99 | 0 | 0 | 0 | not significant |
| 11884 | GO_REGULATION_OF_T_HELPER_1_CELL_DIFFERENTIATION                                          | 1.41 | 0.98 | 0 | 0 | 0 | not significant |
| 11885 | GO_DNA_REPLICATION_FACTOR_C_COMPLEX                                                       | 1.41 | 0.97 | 0 | 0 | 0 | not significant |
| 11886 | GO_POSITIVE_REGULATION_OF_INFLAMMATORY_RESPONSE_TO_ANTIAGENIC_STIMULUS                    | 1.41 | 0.97 | 0 | 0 | 0 | not significant |
| 11887 | GO_POSITIVE_REGULATION_OF_VASOCONSTRICTION                                                | 1.41 | 0.97 | 0 | 0 | 0 | not significant |
| 11888 | GO_INTRINSIC_COMPONENT_OF_VACUOLAR_MEMBRANE                                               | 1.41 | 0.96 | 0 | 0 | 0 | not significant |
| 11889 | GO_NEURONAL_ACTION_POTENTIAL                                                              | 1.41 | 0.96 | 0 | 0 | 0 | not significant |
| 11890 | CAFFAREL_RESPONSE_TO_THC_8HR_5_UP                                                         | 1.41 | 0.95 | 0 | 0 | 0 | not significant |
| 11891 | DODD_NASOPHARYNGEAL_CARCINOMA_4                                                           | 1.42 | 4    | 0 | 0 | 0 | not significant |
| 11892 | GO_TRANSPORTER_ACTIVITY                                                                   | 1.42 | 4    | 0 | 0 | 0 | not significant |
| 11893 | HELLER_HDAC_TARGETS_SILENCED_BY_METHYLATION_UP                                            | 1.42 | 2.2  | 0 | 0 | 0 | not significant |
| 11894 | GO_PEPTIDE_SECRETION                                                                      | 1.42 | 2.13 | 0 | 0 | 0 | not significant |
| 11895 | GO_ORGANIC_ANION_TRANSPORT                                                                | 1.42 | 2    | 0 | 0 | 0 | not significant |
| 11896 | WANG_CISPLATIN_RESPONSE_AND_XPC_DN                                                        | 1.42 | 1.97 | 0 | 0 | 0 | not significant |
| 11897 | GO_EPITHELIAL_CELL_PROLIFERATION                                                          | 1.42 | 1.77 | 0 | 0 | 0 | not significant |
| 11898 | GO_CELLULAR_RESPONSE_TO_ACID_CHEMICAL                                                     | 1.42 | 1.64 | 0 | 0 | 0 | not significant |
| 11899 | CHR8Q24                                                                                   | 1.42 | 1.59 | 0 | 0 | 0 | not significant |
| 11900 | NRL_DNV1_UP                                                                               | 1.42 | 1.57 | 0 | 0 | 0 | not significant |
| 11901 | GO_RESPONSE_TO_KETONE                                                                     | 1.42 | 1.54 | 0 | 0 | 0 | not significant |
| 11902 | ESC_J1_UP_EARLY_V1_DN                                                                     | 1.42 | 1.5  | 0 | 0 | 0 | not significant |
| 11903 | GO_ORGANIC_HYDROXY_COMPOUND_TRANSPORT                                                     | 1.42 | 1.48 | 0 | 0 | 0 | not significant |
| 11904 | BASSO_CD40_SIGNALING_UP                                                                   | 1.42 | 1.33 | 0 | 0 | 0 | not significant |
| 11905 | CHING_MULTIPLE_MYELOMA_HYPERPLOID_UP                                                      | 1.42 | 1.33 | 0 | 0 | 0 | not significant |
| 11906 | MEL18_DNV1_DN                                                                             | 1.42 | 1.31 | 0 | 0 | 0 | not significant |
| 11907 | GO_LIPOSACCHARIDE_METABOLIC_PROCESS                                                       | 1.42 | 1.26 | 0 | 0 | 0 | not significant |
| 11908 | HOELZEL_NF1_TARGETS_DN                                                                    | 1.42 | 1.26 | 0 | 0 | 0 | not significant |
| 11909 | NAKAYAMA_SOFT_TISSUE_TUMORS_PCA1_UP                                                       | 1.42 | 1.22 | 0 | 0 | 0 | not significant |
| 11910 | GO_POSITIVE_REGULATION_OF_FATTY_ACID_TRANSPORT                                            | 1.42 | 1.21 | 0 | 0 | 0 | not significant |
| 11911 | OKAMOTO_LIVER_CANCER_MULTICENTRIC_OCCURRENCE_UP                                           | 1.42 | 1.21 | 0 | 0 | 0 | not significant |
| 11912 | GO_POSITIVE_REGULATION_OF_TOLL_LIKE_RECEPTOR_SIGNALING_PATHWAY                            | 1.42 | 1.19 | 0 | 0 | 0 | not significant |
| 11913 | GO_POSITIVE_REGULATION_OF_ENDOTHELIAL_CELL_CHEMOTAXIS                                     | 1.42 | 1.18 | 0 | 0 | 0 | not significant |
| 11914 | HERNANDEZ_ABERRANT_MITOSIS_BY_DOCETACEL_2NM_DN                                            | 1.42 | 1.18 | 0 | 0 | 0 | not significant |
| 11915 | GO_MODIFIED_AMINO_ACID_BINDING                                                            | 1.42 | 1.17 | 0 | 0 | 0 | not significant |
| 11916 | GO_DETECTION_OF_BIOTIC_STIMULUS                                                           | 1.42 | 1.16 | 0 | 0 | 0 | not significant |
| 11917 | GO_HISTONE_ACETYLTRANSFERASE_BINDING                                                      | 1.42 | 1.16 | 0 | 0 | 0 | not significant |
| 11918 | GO_NEUROTRANSMITTER_RECEPTOR_COMPLEX                                                      | 1.42 | 1.16 | 0 | 0 | 0 | not significant |
| 11919 | KASLER_HDAC7_TARGETS_2_DN                                                                 | 1.42 | 1.14 | 0 | 0 | 0 | not significant |
| 11920 | GO_LONG_CHAIN_FATTY_ACID_IMPORT_ACROSS_PLASMA_MEMBRANE                                    | 1.42 | 1.13 | 0 | 0 | 0 | not significant |
| 11921 | GO_PEPTIDYL_GLUTAMIC_ACID_MODIFICATION                                                    | 1.42 | 1.13 | 0 | 0 | 0 | not significant |
| 11922 | RAMASWAMY_METASTASIS_DN                                                                   | 1.42 | 1.13 | 0 | 0 | 0 | not significant |
| 11923 | GO_CELL_CELL_ADHESION_MEDIATED_BY_INTEGRIN                                                | 1.42 | 1.12 | 0 | 0 | 0 | not significant |
| 11924 | GO_CHEMOKINE_BINDING                                                                      | 1.42 | 1.12 | 0 | 0 | 0 | not significant |
| 11925 | GO_RESPIRATORY_BURST_INVOLVED_IN_DEFENSE_RESPONSE                                         | 1.42 | 1.12 | 0 | 0 | 0 | not significant |
| 11926 | GO_GLIAL_CELL_ACTIVATION                                                                  | 1.42 | 1.11 | 0 | 0 | 0 | not significant |
| 11927 | GO_TOLL_LIKE_RECEPTOR_4_SIGNALING_PATHWAY                                                 | 1.42 | 1.11 | 0 | 0 | 0 | not significant |
| 11928 | GO_DOPAMINERGIC_SYNAPSE                                                                   | 1.42 | 1.1  | 0 | 0 | 0 | not significant |
| 11929 | GO_INTEGRAL_COMPONENT_OF_CYTOPLASMIC_SIDE_OF_ENDOPLASMIC_RETICULUM                        | 1.42 | 1.1  | 0 | 0 | 0 | not significant |
| 11930 | BIOCARTA_GLEEVEC_PATHWAY                                                                  | 1.42 | 1.09 | 0 | 0 | 0 | not significant |
| 11931 | BIOCARTA_IL17_PATHWAY                                                                     | 1.42 | 1.08 | 0 | 0 | 0 | not significant |
| 11932 | GO_AMIDINE_LYASE_ACTIVITY                                                                 | 1.42 | 1.08 | 0 | 0 | 0 | not significant |
| 11933 | GO_T_HELPER_17_TYPE_IMMUNE_RESPONSE                                                       | 1.42 | 1.08 | 0 | 0 | 0 | not significant |
| 11934 | GO_PEPTIDE_ANTIEN_BINDING                                                                 | 1.42 | 1.07 | 0 | 0 | 0 | not significant |
| 11935 | GO_CTF18_RFC_LIKE_COMPLEX                                                                 | 1.42 | 1.06 | 0 | 0 | 0 | not significant |
| 11936 | SABATES_COLORECTAL_ADENOMA_SIZE_UP                                                        | 1.42 | 1.06 | 0 | 0 | 0 | not significant |
| 11937 | GO_CELLULAR_RESPONSE_TO_INTERFERON_ALPHA                                                  | 1.42 | 1.05 | 0 | 0 | 0 | not significant |
| 11938 | GO_NEGATIVE_REGULATION_OF_LIPOPOLYSACCHARIDE_MEDIATED_SIGNALING_PATHWAY                   | 1.42 | 1.05 | 0 | 0 | 0 | not significant |
| 11939 | GO_NEUTROPHIL_APOPTOTIC_PROCESS                                                           | 1.42 | 1.05 | 0 | 0 | 0 | not significant |
| 11940 | GO ASPARTATE METABOLIC PROCESS                                                            | 1.42 | 1.04 | 0 | 0 | 0 | not significant |
| 11941 | KEGG_ALPHA_LINOLENIC_ACID_METABOLISM                                                      | 1.42 | 1.04 | 0 | 0 | 0 | not significant |
| 11942 | GO_REGULATION_OF_PROTEIN_KINASE_C_SIGNALING                                               | 1.42 | 1.02 | 0 | 0 | 0 | not significant |
| 11943 | GO_POSITIVE_REGULATION_OF_REGULATORY_T_CELL_DIFFERENTIATION                               | 1.42 | 1    | 0 | 0 | 0 | not significant |
| 11944 | PID_VEGF_VEGFR_PATHWAY                                                                    | 1.42 | 0.99 | 0 | 0 | 0 | not significant |
| 11945 | GO_LUTEINIZATION                                                                          | 1.42 | 0.96 | 0 | 0 | 0 | not significant |
| 11946 | GO_RESPONSE_TO_HYDROXYUREA                                                                | 1.42 | 0.96 | 0 | 0 | 0 | not significant |
| 11947 | REACTOME_UREA_CYCLE                                                                       | 1.42 | 0.95 | 0 | 0 | 0 | not significant |
| 11948 | GO_NEGATIVE_REGULATION_OF_CAMP_MEDIATED_SIGNALING                                         | 1.42 | 0.94 | 0 | 0 | 0 | not significant |
| 11949 | GO_CELL_CELL_ADHESION                                                                     | 1.43 | 4    | 0 | 0 | 0 | not significant |
| 11950 | GO_CELLULAR_LIPID_METABOLIC_PROCESS                                                       | 1.43 | 4    | 0 | 0 | 0 | not significant |
| 11951 | GO_DEFENSE_RESPONSE                                                                       | 1.43 | 4    | 0 | 0 | 0 | not significant |
| 11952 | GO_DNA_BINDING_TRANSCRIPTION_ACTIVATOR_ACTIVITY                                           | 1.43 | 4    | 0 | 0 | 0 | not significant |
| 11953 | GO_GOLGI_APPARATUS                                                                        | 1.43 | 4    | 0 | 0 | 0 | not significant |
| 11954 | GO_IMMUNE_EFFECTOR_PROCESS                                                                | 1.43 | 4    | 0 | 0 | 0 | not significant |
| 11955 | MITSADES_RESPONSE_TO_APLIDIN_UP                                                           | 1.43 | 2.9  | 0 | 0 | 0 | not significant |
| 11956 | GO_RESPONSE_TO_STEROID_HORMONE                                                            | 1.43 | 2.41 | 0 | 0 | 0 | not significant |
| 11957 | GO_REGULATION_OF_RESPONSE_TO_EXTERNAL_STIMULUS                                            | 1.43 | 2.23 | 0 | 0 | 0 | not significant |
| 11958 | HAN_SATB1_TARGETS_UP                                                                      | 1.43 | 2.12 | 0 | 0 | 0 | not significant |
| 11959 | GO_LATE_ENDOSOME                                                                          | 1.43 | 2.04 | 0 | 0 | 0 | not significant |
| 11960 | RUTELLA_RESPONSE_TO_HGF_DN                                                                | 1.43 | 1.98 | 0 | 0 | 0 | not significant |
| 11961 | GO_POSITIVE_REGULATION_OF_CELL_CELL_ADHESION                                              | 1.43 | 1.79 | 0 | 0 | 0 | not significant |
| 11962 | NIKOLSKY_BREAST_CANCER_Q23_Q24_AMPLICON                                                   | 1.43 | 1.66 | 0 | 0 | 0 | not significant |
| 11963 | GO_RESPONSE_TO_INTERFERON_GAMMA                                                           | 1.43 | 1.65 | 0 | 0 | 0 | not significant |
| 11964 | CHICAS_RB1_TARGETS_LOW_SERUM                                                              | 1.43 | 1.55 | 0 | 0 | 0 | not significant |
| 11965 | GO_FATTY_ACID_BIOSYNTHETIC_PROCESS                                                        | 1.43 | 1.54 | 0 | 0 | 0 | not significant |
| 11966 | HALLMARK_KRAS_SIGNALING_UP                                                                | 1.43 | 1.52 | 0 | 0 | 0 | not significant |
| 11967 | GO_RESPONSE_TO_PURINE_CONTAINING_COMPOUND                                                 | 1.43 | 1.49 | 0 | 0 | 0 | not significant |
| 11968 | RODRIGUES_DCC_TARGETS_DN                                                                  | 1.43 | 1.49 | 0 | 0 | 0 | not significant |
| 11969 | GO_NEGATIVE_REGULATION_OF_LEUKOCYTE_CELL_CELL_ADHESION                                    | 1.43 | 1.47 | 0 | 0 | 0 | not significant |
| 11970 | P53_DNV1_DN                                                                               | 1.43 | 1.42 | 0 | 0 | 0 | not significant |
| 11971 | GO_CELL_CYCLE_DNA_REPLICATION                                                             | 1.43 | 1.41 | 0 | 0 | 0 | not significant |
| 11972 | REACTOME_BASE_EXCISION_REPAIR                                                             | 1.43 | 1.4  | 0 | 0 | 0 | not significant |
| 11973 | GO_IMPORT_ACROSS_PLASMA_MEMBRANE                                                          | 1.43 | 1.34 | 0 | 0 | 0 | not significant |
| 11974 | NABA_ECM_GLYCOPROTEINS                                                                    | 1.43 | 1.34 | 0 | 0 | 0 | not significant |
| 11975 | REACTOME_ACTIVATION_OF_GENE_EXPRESSION_BY_SREBF_SREBP                                     | 1.43 | 1.34 | 0 | 0 | 0 | not significant |
| 11976 | GO_DEACETYLASE_ACTIVITY                                                                   | 1.43 | 1.32 | 0 | 0 | 0 | not significant |
| 11977 | GO ASPARTIC ENDOPEPTIDASE ACTIVITY INTRAMEMBRANE_CLEAVING                                 | 1.43 | 1.27 | 0 | 0 | 0 | not significant |
| 11978 | HOWLIN_PUBERTAL_MAMMARY_GLAND                                                             | 1.43 | 1.26 | 0 | 0 | 0 | not significant |

|       |                                                                    |      |      |   |   |   |                 |
|-------|--------------------------------------------------------------------|------|------|---|---|---|-----------------|
| 11979 | TAKEDA_TARGETS_OF_NUP98_HOXA9_FUSION_10D_DN                        | 1.43 | 1.26 | 0 | 0 | 0 | not significant |
| 11980 | XU_RESPONSE_TO_TRETINOIN_UP                                        | 1.43 | 1.25 | 0 | 0 | 0 | not significant |
| 11981 | GO_ALPHA_AMINO_ACID_BIOSYNTHETIC_PROCESS                           | 1.43 | 1.22 | 0 | 0 | 0 | not significant |
| 11982 | GO_REGULATION_OF_RETROGRADE_PROTEIN_TRANSPORT_ER_TO_CYTOSOL        | 1.43 | 1.21 | 0 | 0 | 0 | not significant |
| 11983 | GO_TRANSCRIPTION_FACTOR_AP_1_COMPLEX                               | 1.43 | 1.2  | 0 | 0 | 0 | not significant |
| 11984 | GO_NARROW_PORE_CHANNEL_ACTIVITY                                    | 1.43 | 1.19 | 0 | 0 | 0 | not significant |
| 11985 | GO_NEGATIVE_REGULATION_OF_ADAPTIVE_IMMUNE_RESPONSE                 | 1.43 | 1.18 | 0 | 0 | 0 | not significant |
| 11986 | PEPPER_CHRONIC_LYMPHOCTIC_LEUKEMIA_UP                              | 1.43 | 1.18 | 0 | 0 | 0 | not significant |
| 11987 | PLASARI_TGFB1_SIGNALING_VIA_NFIC_1HR_UP                            | 1.43 | 1.18 | 0 | 0 | 0 | not significant |
| 11988 | FOURNIER_ACINAR_DEVELOPMENT_EARLY_DN                               | 1.43 | 1.16 | 0 | 0 | 0 | not significant |
| 11989 | GO_REGULATORY_T_CELL_DIFFERENTIATION                               | 1.43 | 1.16 | 0 | 0 | 0 | not significant |
| 11990 | GO_UREA_CYCLE                                                      | 1.43 | 1.16 | 0 | 0 | 0 | not significant |
| 11991 | BIOCARTA_SKP2ZF_PATHWAY                                            | 1.43 | 1.14 | 0 | 0 | 0 | not significant |
| 11992 | GO_MYOBLAST_FUSION                                                 | 1.43 | 1.12 | 0 | 0 | 0 | not significant |
| 11993 | PEDERSEN_METASTASIS_BY_ERBB2_ISOFORM_1                             | 1.43 | 1.12 | 0 | 0 | 0 | not significant |
| 11994 | REACTOME_CDC6_ASSOCIATION_WITH_THE_ORC.ORIGIN_COMPLEX              | 1.43 | 1.12 | 0 | 0 | 0 | not significant |
| 11995 | GO_REGULATION_OF_ENDOTHELIAL_CELL_CHEMOTAXIS                       | 1.43 | 1.11 | 0 | 0 | 0 | not significant |
| 11996 | GO_REGULATION_OF_TRANSLATION_IN_RESPONSE_TO_ENDOPLASMIC_RETICULUM  | 1.43 | 1.1  | 0 | 0 | 0 | not significant |
| 11997 | GERHOLD_RESPONSE_TO_TZD_DN                                         | 1.43 | 1.09 | 0 | 0 | 0 | not significant |
| 11998 | GO_MANNOSYL_OLIGOSACCHARIDE_MANNOSIDASE_ACTIVITY                   | 1.43 | 1.09 | 0 | 0 | 0 | not significant |
| 11999 | GO_RESPONSE_TO_VITAMIN_E                                           | 1.43 | 1.09 | 0 | 0 | 0 | not significant |
| 12000 | SA_B_CELL_RECEPTOR_COMPLEXES                                       | 1.43 | 1.08 | 0 | 0 | 0 | not significant |
| 12001 | LU_TUMOR_ANGIOGENESIS_UP                                           | 1.43 | 1.07 | 0 | 0 | 0 | not significant |
| 12002 | GO_C21_STEROID_HORMONE_BIOSYNTHETIC_PROCESS                        | 1.43 | 1.06 | 0 | 0 | 0 | not significant |
| 12003 | REACTOME_MET_ACTIVATES_PTK2_SIGNALING                              | 1.43 | 1.06 | 0 | 0 | 0 | not significant |
| 12004 | UROSEVIC_RESPONSE_TO_MIGUIMOD                                      | 1.43 | 1.06 | 0 | 0 | 0 | not significant |
| 12005 | RAMJAIN_APOPTOSIS_BY_TGFB1_VIA_SMAD4_UP                            | 1.43 | 1.05 | 0 | 0 | 0 | not significant |
| 12006 | GO_NEGATIVE_REGULATION_OF_STEROID_METABOLIC_PROCESS                | 1.43 | 1.03 | 0 | 0 | 0 | not significant |
| 12007 | NIELSEN_GIST_VS_SYNOVIAL_SARCOMA_DN                                | 1.43 | 1.01 | 0 | 0 | 0 | not significant |
| 12008 | GO_MEMBRANE_RAFT_LOCALIZATION                                      | 1.43 | 0.99 | 0 | 0 | 0 | not significant |
| 12009 | GO_REGULATION_OF_ICOSANOID_SECRETION                               | 1.43 | 0.99 | 0 | 0 | 0 | not significant |
| 12010 | GO_BEHAVIOR                                                        | 1.44 | 2.88 | 0 | 0 | 0 | not significant |
| 12011 | MIKKELSEN_ES_ICP_WITH_H3K4ME3                                      | 1.44 | 2.43 | 0 | 0 | 0 | not significant |
| 12012 | RUTELLA_RESPONSE_TO_CSF2RB_AND_IL4_UP                              | 1.44 | 2.29 | 0 | 0 | 0 | not significant |
| 12013 | GO_NEGATIVE_REGULATION_OF_RESPONSE_TO_EXTERNAL_STIMULUS            | 1.44 | 2.09 | 0 | 0 | 0 | not significant |
| 12014 | MOREAUX_MULTIPLE_MYELOMA_BY_TACI_UP                                | 1.44 | 1.92 | 0 | 0 | 0 | not significant |
| 12015 | GO_CELLULAR_RESPONSE_TO_BIOTIC_STIMULUS                            | 1.44 | 1.82 | 0 | 0 | 0 | not significant |
| 12016 | DAVICIONI_MOLECULAR_ARMS_VS_ERMS_DN                                | 1.44 | 1.74 | 0 | 0 | 0 | not significant |
| 12017 | GO_DNA_DAMAGE_RESPONSE_SIGNAL_TRANSDUCTION_BY_P53_CLASS_MEDIATOR   | 1.44 | 1.66 | 0 | 0 | 0 | not significant |
| 12018 | TAKEDA_TARGETS_OF_NUP98_HOXA9_FUSION_10D_UP                        | 1.44 | 1.59 | 0 | 0 | 0 | not significant |
| 12019 | GO_LIGASE_ACTIVITY_FORMING_COXON_NITROGEN_BONDS                    | 1.44 | 1.49 | 0 | 0 | 0 | not significant |
| 12020 | MORI_SMALL_PRE_BII_LYMPHOCYTE_UP                                   | 1.44 | 1.42 | 0 | 0 | 0 | not significant |
| 12021 | KEGG_ARRHYTHMOGENIC_RIGHT_VENTRICULAR_CARDIOMYOPATHY_ARVC          | 1.44 | 1.4  | 0 | 0 | 0 | not significant |
| 12022 | AMIT_EGF_RESPONSE_240_HELA                                         | 1.44 | 1.37 | 0 | 0 | 0 | not significant |
| 12023 | GO_CELLULAR_RESPONSE_TO_KETONE                                     | 1.44 | 1.35 | 0 | 0 | 0 | not significant |
| 12024 | HILLION_HMGA1B_TARGETS                                             | 1.44 | 1.31 | 0 | 0 | 0 | not significant |
| 12025 | KLEIN_TARGETS_OF_BCR_ABL1_FUSION                                   | 1.44 | 1.26 | 0 | 0 | 0 | not significant |
| 12026 | GO_PROTEIN_TRIMERIZATION                                           | 1.44 | 1.25 | 0 | 0 | 0 | not significant |
| 12027 | BIOCARTA_ERAD_PATHWAY                                              | 1.44 | 1.24 | 0 | 0 | 0 | not significant |
| 12028 | GO_POSITIVE_REGULATION_OF_TRANSCRIPTION_FROM_RNA_POLYMERASE_II_PR  | 1.44 | 1.23 | 0 | 0 | 0 | not significant |
| 12029 | KEGG_PRIMARY_IMMUNODEFICIENCY                                      | 1.44 | 1.22 | 0 | 0 | 0 | not significant |
| 12030 | GO_POSITIVE_REGULATION_OF_LYMPHOCYTE_MIGRATION                     | 1.44 | 1.21 | 0 | 0 | 0 | not significant |
| 12031 | GO_COMMISSURAL_NEURON_AXON_GUIDANCE                                | 1.44 | 1.19 | 0 | 0 | 0 | not significant |
| 12032 | GO_MULTIVESICULAR_BODY                                             | 1.44 | 1.19 | 0 | 0 | 0 | not significant |
| 12033 | HOEGERKORP_CD44_TARGETS_TEMPORAL_UP                                | 1.44 | 1.19 | 0 | 0 | 0 | not significant |
| 12034 | GO_LEUKOCYTE_ADHESION_TO_VASCULAR_ENDOTHELIAL_CELL                 | 1.44 | 1.18 | 0 | 0 | 0 | not significant |
| 12035 | GO_MISMATCH_REPAIR                                                 | 1.44 | 1.18 | 0 | 0 | 0 | not significant |
| 12036 | GO_ORGANIC_CATION_TRANSPORT                                        | 1.44 | 1.18 | 0 | 0 | 0 | not significant |
| 12037 | GO_REGULATION_OF_AXON_GUIDANCE                                     | 1.44 | 1.17 | 0 | 0 | 0 | not significant |
| 12038 | GO_TERPENOID_BIOSYNTHETIC_PROCESS                                  | 1.44 | 1.16 | 0 | 0 | 0 | not significant |
| 12039 | GUENTHER_GROWTH_SPHERICAL_VS_ADHERENT_UP                           | 1.44 | 1.16 | 0 | 0 | 0 | not significant |
| 12040 | REACTOME_DSCAM_INTERACTIONS                                        | 1.44 | 1.16 | 0 | 0 | 0 | not significant |
| 12041 | GO_POTASSIUM_ION_EXPORT_ACROSS_PLASMA_MEMBRANE                     | 1.44 | 1.15 | 0 | 0 | 0 | not significant |
| 12042 | PID_PRL_SIGNALING_EVENTS_PATHWAY                                   | 1.44 | 1.15 | 0 | 0 | 0 | not significant |
| 12043 | GO_BONE_MATURATION                                                 | 1.44 | 1.14 | 0 | 0 | 0 | not significant |
| 12044 | GO_GLYCEROPHOSPHOLIPID_CATABOLIC_PROCESS                           | 1.44 | 1.14 | 0 | 0 | 0 | not significant |
| 12045 | GO_PHOSPHATIDIC_ACID_BINDING                                       | 1.44 | 1.14 | 0 | 0 | 0 | not significant |
| 12046 | TURJANSKI_MAPK7_TARGETS                                            | 1.44 | 1.14 | 0 | 0 | 0 | not significant |
| 12047 | GARGALOVIC_RESPONSE_TO_OXIDIZED_PHOSPHOLIPIDS_BROWN_UP             | 1.44 | 1.13 | 0 | 0 | 0 | not significant |
| 12048 | KRAS_50_UP.V1_DN                                                   | 1.44 | 1.13 | 0 | 0 | 0 | not significant |
| 12049 | GO_ACROSOME_REACTION                                               | 1.44 | 1.12 | 0 | 0 | 0 | not significant |
| 12050 | NAKAYAMA_FGF2_TARGETS                                              | 1.44 | 1.12 | 0 | 0 | 0 | not significant |
| 12051 | REACTOME_NEUROTOXICITY_OF_CLOSTRIDIUM_TOXINS                       | 1.44 | 1.12 | 0 | 0 | 0 | not significant |
| 12052 | SEITZ_NEOPLASTIC_TRANSFORMATION_BY_8P_DELETION_DN                  | 1.44 | 1.12 | 0 | 0 | 0 | not significant |
| 12053 | NIELSEN_SYNOVIAL_SARCOMA_DN                                        | 1.44 | 1.11 | 0 | 0 | 0 | not significant |
| 12054 | GO_REGULATION_OF_HISTONE_H3_K9_ACETYLATION                         | 1.44 | 1.1  | 0 | 0 | 0 | not significant |
| 12055 | GO_REGULATION_OF_FATTY_ACID_TRANSPORT                              | 1.44 | 1.09 | 0 | 0 | 0 | not significant |
| 12056 | GO_SERINE_TYPE_ENDOPEPTIDASE_INHIBITOR_ACTIVITY                    | 1.44 | 1.09 | 0 | 0 | 0 | not significant |
| 12057 | KYNG_DNA_DAMAGE_BY_4NQO                                            | 1.44 | 1.09 | 0 | 0 | 0 | not significant |
| 12058 | REACTOME_NUCLEAR_SIGNALING_BY_ERBB4                                | 1.44 | 1.09 | 0 | 0 | 0 | not significant |
| 12059 | GO_GOLGI_TRANS_CISTERNA                                            | 1.44 | 1.08 | 0 | 0 | 0 | not significant |
| 12060 | GO_GLUTATHIONE_PEROXIDASE_ACTIVITY                                 | 1.44 | 1.06 | 0 | 0 | 0 | not significant |
| 12061 | GO_HISTONE_H3_K9_ACETYLATION                                       | 1.44 | 1.06 | 0 | 0 | 0 | not significant |
| 12062 | GO_POSITIVE_REGULATION_OF_CELL_MIGRATION_INVOLVED_IN_SPROUTING_ANG | 1.44 | 1.05 | 0 | 0 | 0 | not significant |
| 12063 | GO_AMYLOID_PRECURSOR_PROTEIN_BIOSYNTHETIC_PROCESS                  | 1.44 | 1.03 | 0 | 0 | 0 | not significant |
| 12064 | GO_LEUKOTRIENE_METABOLIC_PROCESS                                   | 1.44 | 0.99 | 0 | 0 | 0 | not significant |
| 12065 | GO_CELL_ACTIVATION_INVOLVED_IN_IMMUNE_RESPONSE                     | 1.45 | 4    | 0 | 0 | 0 | not significant |
| 12066 | GO_RESPONSE_TO_LIPID                                               | 1.45 | 4    | 0 | 0 | 0 | not significant |
| 12067 | HOXA9_DN.V1_DN                                                     | 1.45 | 2.17 | 0 | 0 | 0 | not significant |
| 12068 | DANG_REGULATED_BY_MYC_DN                                           | 1.45 | 2.02 | 0 | 0 | 0 | not significant |
| 12069 | ACEVEDO_FGFR1_TARGETS_IN_PROSTATE_CANCER_MODEL_UP                  | 1.45 | 1.91 | 0 | 0 | 0 | not significant |
| 12070 | LIU_VMYB_TARGETS_UP                                                | 1.45 | 1.71 | 0 | 0 | 0 | not significant |
| 12071 | MIKKELSEN_IPS_LCP_WITH_H3K4ME3                                     | 1.45 | 1.66 | 0 | 0 | 0 | not significant |
| 12072 | HOSHIDA_LIVER_CANCER_SUBCLASS_S3                                   | 1.45 | 1.65 | 0 | 0 | 0 | not significant |
| 12073 | GO_MONOCARBOXYLIC_ACID_BIOSYNTHETIC_PROCESS                        | 1.45 | 1.64 | 0 | 0 | 0 | not significant |
| 12074 | GO_REGULATION_OF_PH                                                | 1.45 | 1.53 | 0 | 0 | 0 | not significant |
| 12075 | CHR1Q23                                                            | 1.45 | 1.49 | 0 | 0 | 0 | not significant |
| 12076 | GO_ACETYLGUCOSAMINYLTRANSFERASE_ACTIVITY                           | 1.45 | 1.42 | 0 | 0 | 0 | not significant |
| 12077 | REACTOME_HOMOLOGOUS_DNA_PAIRING_AND_STRAND_EXCHANGE                | 1.45 | 1.41 | 0 | 0 | 0 | not significant |
| 12078 | PID_FANCONI_PATHWAY                                                | 1.45 | 1.36 | 0 | 0 | 0 | not significant |
| 12079 | GO_REGULATION_OF_TRANSCRIPTION_INVOLVED_IN_G1_S_TRANSITION_OF_MITO | 1.45 | 1.35 | 0 | 0 | 0 | not significant |
| 12080 | GO_NADP_BINDING                                                    | 1.45 | 1.34 | 0 | 0 | 0 | not significant |
| 12081 | GO_POSITIVE_REGULATION_OF_SMALL_GTPASE_MEDIATED_SIGNAL_TRANSDUCTI  | 1.45 | 1.3  | 0 | 0 | 0 | not significant |
| 12082 | GO_CELLULAR_RESPONSE_TO_CALCIIUM_ION                               | 1.45 | 1.29 | 0 | 0 | 0 | not significant |
| 12083 | GO_ORGANIC_ACID_SODIUM_SYMPORTER_ACTIVITY                          | 1.45 | 1.29 | 0 | 0 | 0 | not significant |
| 12084 | CHIARADONNA_NEOPLASTIC_TRANSFORMATION_KRAS_CDC25_UP                | 1.45 | 1.28 | 0 | 0 | 0 | not significant |
| 12085 | GO_PHOSPHOLIPASE_ACTIVITY                                          | 1.45 | 1.28 | 0 | 0 | 0 | not significant |
| 12086 | GO_POSITIVE_REGULATION_OF_BLOOD_VESSEL_ENDOTHELIAL_CELL_MIGRATION  | 1.45 | 1.27 | 0 | 0 | 0 | not significant |
| 12087 | GO_REGULATION_OF_DOUBLE_STRAND_BREAK_REPAIR_VIA_HOMOLOGOUS_REC     | 1.45 | 1.27 | 0 | 0 | 0 | not significant |

|       |                                                                     |      |      |   |   |   |                 |
|-------|---------------------------------------------------------------------|------|------|---|---|---|-----------------|
| 12088 | GO_PHOSPHOLIPASE_A2_ACTIVITY                                        | 1.45 | 1.25 | 0 | 0 | 0 | not significant |
| 12089 | MEISSNER_BRAIN_HCP_WITH_H3K4ME2_AND_H3K27ME3                        | 1.45 | 1.24 | 0 | 0 | 0 | not significant |
| 12090 | GO_FOUR_WAY_JUNCTION_HELICASE_ACTIVITY                              | 1.45 | 1.23 | 0 | 0 | 0 | not significant |
| 12091 | GO_FEEDING_BEHAVIOR                                                 | 1.45 | 1.22 | 0 | 0 | 0 | not significant |
| 12092 | GO_EPITHELIAL_CELL_MATURATION                                       | 1.45 | 1.21 | 0 | 0 | 0 | not significant |
| 12093 | GO_INTRINSIC_COMPONENT_OF_SYNAPTIC_VESICLE_MEMBRANE                 | 1.45 | 1.21 | 0 | 0 | 0 | not significant |
| 12094 | JEPSEN_SMRT_TARGETS                                                 | 1.45 | 1.21 | 0 | 0 | 0 | not significant |
| 12095 | KRIEG_HYPOXIA_VIA_KDM3A                                             | 1.45 | 1.21 | 0 | 0 | 0 | not significant |
| 12096 | ZAIDI_OSTEOLAST_TRANSCRIPTION_FACTORS                               | 1.45 | 1.2  | 0 | 0 | 0 | not significant |
| 12097 | GO_NEPHRIC_DUCT_MORPHOGENESIS                                       | 1.45 | 1.19 | 0 | 0 | 0 | not significant |
| 12098 | TAKADA_GASTRIC_CANCER_COPY_NUMBER_DN                                | 1.45 | 1.19 | 0 | 0 | 0 | not significant |
| 12099 | GO_COBALAMIN_METABOLIC_PROCESS                                      | 1.45 | 1.17 | 0 | 0 | 0 | not significant |
| 12100 | GO_RESPONSE_TO_AMINE                                                | 1.45 | 1.17 | 0 | 0 | 0 | not significant |
| 12101 | GO_CAMP_RESPONSE_ELEMENT_BINDING                                    | 1.45 | 1.16 | 0 | 0 | 0 | not significant |
| 12102 | GO_CELLULAR_RESPONSE_TO_GROWTH_HORMONE_STIMULUS                     | 1.45 | 1.16 | 0 | 0 | 0 | not significant |
| 12103 | GO_ENDOPLASMIC_RETICULUM_MANNOSE_TRIMMING                           | 1.45 | 1.16 | 0 | 0 | 0 | not significant |
| 12104 | GO_POTASSIUM_ION_HOMEOSTASIS                                        | 1.45 | 1.16 | 0 | 0 | 0 | not significant |
| 12105 | NOJIMA_SFRP2_TARGETS_DN                                             | 1.45 | 1.15 | 0 | 0 | 0 | not significant |
| 12106 | REACTOME_A_TETRASACCHARIDE_LINKER_SEQUENCE_IS_REQUIRED_FOR_GAG_     | 1.45 | 1.15 | 0 | 0 | 0 | not significant |
| 12107 | MAHADEVAN_RESPONSE_TO_MP470_UP                                      | 1.45 | 1.14 | 0 | 0 | 0 | not significant |
| 12108 | GO_N_GLYCAN_PROCESSING                                              | 1.45 | 1.13 | 0 | 0 | 0 | not significant |
| 12109 | ODONNELL_METASTASIS_DN                                              | 1.45 | 1.13 | 0 | 0 | 0 | not significant |
| 12110 | BIOCARTA_DREAM_PATHWAY                                              | 1.45 | 1.12 | 0 | 0 | 0 | not significant |
| 12111 | GO_REGULATION_OF_MICROTUBULE_BASED_MOVEMENT                         | 1.45 | 1.12 | 0 | 0 | 0 | not significant |
| 12112 | MATHEW_FANCONI_ANEMIA_GENES                                         | 1.45 | 1.12 | 0 | 0 | 0 | not significant |
| 12113 | MATZUK_CENTRAL_FOR_FEMALE_FERTILITY                                 | 1.45 | 1.12 | 0 | 0 | 0 | not significant |
| 12114 | GO_SULFUR_COMPOUND_TRANSMEMBRANE_TRANSPORTER_ACTIVITY               | 1.45 | 1.11 | 0 | 0 | 0 | not significant |
| 12115 | GO_NEGATIVE_REGULATION_OF_PROTEIN_MATURATION                        | 1.45 | 1.08 | 0 | 0 | 0 | not significant |
| 12116 | GO_ION_TRANSMEMBRANE_TRANSPORT                                      | 1.46 | 4    | 0 | 0 | 0 | not significant |
| 12117 | GRAESSMANN_APOPTOSIS_BY_DOXORUBICIN_UP                              | 1.46 | 4    | 0 | 0 | 0 | not significant |
| 12118 | MILI_PSEUDOPODIA_CHEMOTAXIS_DN                                      | 1.46 | 4    | 0 | 0 | 0 | not significant |
| 12119 | THUM_SYSTOLIC_HEART_FAILURE_UP                                      | 1.46 | 2.6  | 0 | 0 | 0 | not significant |
| 12120 | GO_MONOVALENT_INORGANIC_CATION_TRANSMEMBRANE_TRANSPORTER_ACTIV      | 1.46 | 2.25 | 0 | 0 | 0 | not significant |
| 12121 | GO_COGNITION                                                        | 1.46 | 2.16 | 0 | 0 | 0 | not significant |
| 12122 | GO_LEUKOCYTE_CELL_CELL_ADHESION                                     | 1.46 | 2.11 | 0 | 0 | 0 | not significant |
| 12123 | BOQUEST_STEM_CELL_DN                                                | 1.46 | 1.81 | 0 | 0 | 0 | not significant |
| 12124 | ACEVEDO_FGFR1_TARGETS_IN_PROSTATE_CANCER_MODEL_DN                   | 1.46 | 1.74 | 0 | 0 | 0 | not significant |
| 12125 | RELA_DNV1_UP                                                        | 1.46 | 1.74 | 0 | 0 | 0 | not significant |
| 12126 | GO_REGULATION_OF_T_CELL_DIFFERENTIATION                             | 1.46 | 1.72 | 0 | 0 | 0 | not significant |
| 12127 | PYEON_HPV_POSITIVE_TUMORS_UP                                        | 1.46 | 1.68 | 0 | 0 | 0 | not significant |
| 12128 | AMBROSINI_FLAVOPIRIDOL_TREATMENT_TP53                               | 1.46 | 1.55 | 0 | 0 | 0 | not significant |
| 12129 | REACTOME_HDR_THROUGH_HOMOLOGOUS_RECOMBINATION_HRR                   | 1.46 | 1.54 | 0 | 0 | 0 | not significant |
| 12130 | REACTOME_POST_TRANSLATIONAL_MODIFICATION_SYNTHESIS_OF_GPI_ANCHOR    | 1.46 | 1.51 | 0 | 0 | 0 | not significant |
| 12131 | GO_ASSOCIATIVE_LEARNING                                             | 1.46 | 1.49 | 0 | 0 | 0 | not significant |
| 12132 | GO_CELLULAR_RESPONSE_TO_ALCOHOL                                     | 1.46 | 1.45 | 0 | 0 | 0 | not significant |
| 12133 | GO_MEMORY                                                           | 1.46 | 1.44 | 0 | 0 | 0 | not significant |
| 12134 | GO_REGULATION_OF_LEUKOCYTE_CHEMOTAXIS                               | 1.46 | 1.44 | 0 | 0 | 0 | not significant |
| 12135 | GO_CARBOHYDRATE_DERIVATIVE_TRANSPORT                                | 1.46 | 1.38 | 0 | 0 | 0 | not significant |
| 12136 | GO_AMYLOID_BETA_BINDING                                             | 1.46 | 1.35 | 0 | 0 | 0 | not significant |
| 12137 | KEGG_ECM_RECEPTOR_INTERACTION                                       | 1.46 | 1.35 | 0 | 0 | 0 | not significant |
| 12138 | GO_POSITIVE_REGULATION_OF_CHEMOKINE_BIOSYNTHETIC_PROCESS            | 1.46 | 1.34 | 0 | 0 | 0 | not significant |
| 12139 | GO_PROTEIN_KINASE_C_ACTIVATING_G_PROTEIN_COUPLED_RECEPTOR_SIGNALI   | 1.46 | 1.34 | 0 | 0 | 0 | not significant |
| 12140 | CHR6P12                                                             | 1.46 | 1.32 | 0 | 0 | 0 | not significant |
| 12141 | HOFFMANN_IMMATURE_TO_MATURE_B_LYMPHOCYTE_UP                         | 1.46 | 1.32 | 0 | 0 | 0 | not significant |
| 12142 | REACTOME_P2Y_RECEPTORS                                              | 1.46 | 1.32 | 0 | 0 | 0 | not significant |
| 12143 | AMIT_EGF_RESPONSE_G0_MCF10A                                         | 1.46 | 1.31 | 0 | 0 | 0 | not significant |
| 12144 | GO_POSITIVE_REGULATION_OF_AMYLOID_BETA_CLEARANCE                    | 1.46 | 1.3  | 0 | 0 | 0 | not significant |
| 12145 | MCCLUNG_COCAINE_REWARD_4WK                                          | 1.46 | 1.3  | 0 | 0 | 0 | not significant |
| 12146 | GO_INTERLEUKIN_13_SECRETION                                         | 1.46 | 1.29 | 0 | 0 | 0 | not significant |
| 12147 | GO_NUCLEOTIDE_EXCISION_REPAIR_DNA_GAP_FILLING                       | 1.46 | 1.27 | 0 | 0 | 0 | not significant |
| 12148 | GO_CELL_MIGRATION_INVOLVED_IN_HEART_DEVELOPMENT                     | 1.46 | 1.27 | 0 | 0 | 0 | not significant |
| 12149 | CHESLER_BRAIN_HIGHEST_EXPRESSION                                    | 1.46 | 1.26 | 0 | 0 | 0 | not significant |
| 12150 | GO_OLIGOPEPTIDE_TRANSPORT                                           | 1.46 | 1.26 | 0 | 0 | 0 | not significant |
| 12151 | PID_FGF_PATHWAY                                                     | 1.46 | 1.26 | 0 | 0 | 0 | not significant |
| 12152 | GO_NEGATIVE_REGULATION_OF_LYMPHOCYTE_MEDIATED_IMMUNITY              | 1.46 | 1.25 | 0 | 0 | 0 | not significant |
| 12153 | MMS_MOUSE_LYMPH_HIGH_4HRS_UP                                        | 1.46 | 1.24 | 0 | 0 | 0 | not significant |
| 12154 | GO_NEGATIVE_REGULATION_OF_CELL_MIGRATION_INVOLVED_IN_SPROUTING_AX   | 1.46 | 1.23 | 0 | 0 | 0 | not significant |
| 12155 | GO_NUCLEAR_MEMBRANE_PART                                            | 1.46 | 1.23 | 0 | 0 | 0 | not significant |
| 12156 | GO_POTASSIUM_ION_LEAK_CHANNEL_ACTIVITY                              | 1.46 | 1.22 | 0 | 0 | 0 | not significant |
| 12157 | GO_HISTONE_DEACETYLASE_ACTIVITY_H3_K14_SPECIFIC                     | 1.46 | 1.21 | 0 | 0 | 0 | not significant |
| 12158 | GO_MODULATION_OF_GROWTH_OF_SYMBIOT_INVOLVED_IN_INTERACTION_WITH     | 1.46 | 1.21 | 0 | 0 | 0 | not significant |
| 12159 | REACTOME_CONSTITUTIVE_SIGNALING_BY_AKT1_E17K_IN_CANCER              | 1.46 | 1.21 | 0 | 0 | 0 | not significant |
| 12160 | GO_DNA_REPLICATION_CHECKPOINT                                       | 1.46 | 1.2  | 0 | 0 | 0 | not significant |
| 12161 | GO_IONOTROPIC_Glutamate_Receptor_Signaling_Pathway                  | 1.46 | 1.2  | 0 | 0 | 0 | not significant |
| 12162 | KEGG_GLYOXYLATE_AND_DICARBOXYLATE_METABOLISM                        | 1.46 | 1.2  | 0 | 0 | 0 | not significant |
| 12163 | CHR7P12                                                             | 1.46 | 1.18 | 0 | 0 | 0 | not significant |
| 12164 | GO_CARBON_SULFUR_LYASE_ACTIVITY                                     | 1.46 | 1.18 | 0 | 0 | 0 | not significant |
| 12165 | GO_CLATHRIN_SCULPTED_VESICLE                                        | 1.46 | 1.18 | 0 | 0 | 0 | not significant |
| 12166 | GO_REGULATION_OF_CYSSTEINE_TYPE_ENDOPEPTIDASE_ACTIVITY_INVOLVED_IN_ | 1.46 | 1.18 | 0 | 0 | 0 | not significant |
| 12167 | GO_REGULATION_OF_MONOCYTE_CHEMOTAXIS                                | 1.46 | 1.16 | 0 | 0 | 0 | not significant |
| 12168 | GO_VENTRAL_SPINAL_CORD_DEVELOPMENT                                  | 1.46 | 1.16 | 0 | 0 | 0 | not significant |
| 12169 | REACTOME_SYNTHESIS_OF_LEUKOTRIENES_LT_AND_EOXINS_EX                 | 1.46 | 1.16 | 0 | 0 | 0 | not significant |
| 12170 | DAVIES_MULTIPLE_MYELOMA_VS_MGUS_DN                                  | 1.46 | 1.15 | 0 | 0 | 0 | not significant |
| 12171 | KEGG_GLYCOSAMINOGLYCAN_BIOSYNTHESIS_CHONDROITIN_SULFATE             | 1.46 | 1.15 | 0 | 0 | 0 | not significant |
| 12172 | GO_ISOTYPE_SWITCHING_TO_IGG_ISOTYPES                                | 1.46 | 1.14 | 0 | 0 | 0 | not significant |
| 12173 | RORIE_TARGETS_OF_EWSR1_FLI1_FUSION_UP                               | 1.46 | 1.14 | 0 | 0 | 0 | not significant |
| 12174 | POS_RESPONSE_TO_HISTAMINE_DN                                        | 1.46 | 1.08 | 0 | 0 | 0 | not significant |
| 12175 | GO_CELL_ACTIVATION                                                  | 1.47 | 4    | 0 | 0 | 0 | not significant |
| 12176 | GO_LIPID_METABOLIC_PROCESS                                          | 1.47 | 4    | 0 | 0 | 0 | not significant |
| 12177 | GO_LIPID_BIOSYNTHETIC_PROCESS                                       | 1.47 | 2.9  | 0 | 0 | 0 | not significant |
| 12178 | OSWALD_HEMATOPOIETIC_STEM_CELL_IN_COLLAGEN_GEL_DN                   | 1.47 | 2.86 | 0 | 0 | 0 | not significant |
| 12179 | FULCHER_INFLAMMATORY_RESPONSE_LECTIN_VS_LPS_DN                      | 1.47 | 2.31 | 0 | 0 | 0 | not significant |
| 12180 | STK33_NOMO_DN                                                       | 1.47 | 2.28 | 0 | 0 | 0 | not significant |
| 12181 | TORCHIA_TARGETS_OF_EWSR1_FLI1_FUSION_UP                             | 1.47 | 2.16 | 0 | 0 | 0 | not significant |
| 12182 | MULLIGHAN_MLL_SIGNATURE_1_DN                                        | 1.47 | 2.02 | 0 | 0 | 0 | not significant |
| 12183 | GO_POSITIVE_REGULATION_OF_I_KAPPAB_KINASE_NF_KAPPAB_SIGNALING       | 1.47 | 1.83 | 0 | 0 | 0 | not significant |
| 12184 | KEGG_SYSTEMIC_LUPUS_ERYTHEMATOSUS                                   | 1.47 | 1.83 | 0 | 0 | 0 | not significant |
| 12185 | CHIANG_LIVER_CANCER_SUBCLASS_CTNNB1_DN                              | 1.47 | 1.73 | 0 | 0 | 0 | not significant |
| 12186 | GO_REGULATION_OF_LEUKOCYTE_MIGRATION                                | 1.47 | 1.72 | 0 | 0 | 0 | not significant |
| 12187 | HOLLERN_EMT_BREAST_TUMOR_UP                                         | 1.47 | 1.71 | 0 | 0 | 0 | not significant |
| 12188 | GO_MAINTENANCE_OF_PROTEIN_LOCATION                                  | 1.47 | 1.69 | 0 | 0 | 0 | not significant |
| 12189 | GO_NEGATIVE_REGULATION_OF_IMMUNE_RESPONSE                           | 1.47 | 1.65 | 0 | 0 | 0 | not significant |
| 12190 | FLECHNER_BIOPSY_KIDNEY_TRANSPLANT_REJECTED_VS_OK_UP                 | 1.47 | 1.62 | 0 | 0 | 0 | not significant |
| 12191 | GO_ARGININE_TRANSMEMBRANE_TRANSPORT                                 | 1.47 | 1.6  | 0 | 0 | 0 | not significant |
| 12192 | GO_VOLTAGE_GATED_ION_CHANNEL_ACTIVITY                               | 1.47 | 1.57 | 0 | 0 | 0 | not significant |
| 12193 | CHR15Q26                                                            | 1.47 | 1.52 | 0 | 0 | 0 | not significant |
| 12194 | GO_MIDGUT_DEVELOPMENT                                               | 1.47 | 1.48 | 0 | 0 | 0 | not significant |
| 12195 | GO_FATTY_ACID_DERIVATIVE_TRANSPORT                                  | 1.47 | 1.41 | 0 | 0 | 0 | not significant |
| 12196 | MAHAJAN_RESPONSE_TO_IL1A_UP                                         | 1.47 | 1.39 | 0 | 0 | 0 | not significant |

|       |                                                                   |      |      |   |   |   |                 |
|-------|-------------------------------------------------------------------|------|------|---|---|---|-----------------|
| 12197 | SEITZ_NEOPLASTIC_TRANSFORMATION_BY_8P_DELETION_UP                 | 1.47 | 1.39 | 0 | 0 | 0 | not significant |
| 12198 | LEE_LIVER_CANCER_E2F1_UP                                          | 1.47 | 1.36 | 0 | 0 | 0 | not significant |
| 12199 | GO_HEXOSAMINIDASE_ACTIVITY                                        | 1.47 | 1.35 | 0 | 0 | 0 | not significant |
| 12200 | GO_AMINO_ACID_BINDING                                             | 1.47 | 1.34 | 0 | 0 | 0 | not significant |
| 12201 | GO_L_ALPHA_AMINO_ACID_TRANSMEMBRANE_TRANSPORT                     | 1.47 | 1.34 | 0 | 0 | 0 | not significant |
| 12202 | PID_S1P_S1P2_PATHWAY                                              | 1.47 | 1.34 | 0 | 0 | 0 | not significant |
| 12203 | REACTOME_PROCESSIVE_SYNTHESIS_ON_THE_LAGGING_STRAND               | 1.47 | 1.33 | 0 | 0 | 0 | not significant |
| 12204 | GO_RESPONSE_TO_INTERLEUKIN_7                                      | 1.47 | 1.32 | 0 | 0 | 0 | not significant |
| 12205 | GO_NUCLEAR_ENVELOPE_LUMEN                                         | 1.47 | 1.31 | 0 | 0 | 0 | not significant |
| 12206 | MEDINA_SMARCA4_TARGETS                                            | 1.47 | 1.31 | 0 | 0 | 0 | not significant |
| 12207 | GO_O_ACETYLTTRANSFERASE_ACTIVITY                                  | 1.47 | 1.3  | 0 | 0 | 0 | not significant |
| 12208 | MURAKAMI_UV_RESPONSE_24HR                                         | 1.47 | 1.3  | 0 | 0 | 0 | not significant |
| 12209 | GO_ISOPRENOID_BIOSYNTHETIC_PROCESS                                | 1.47 | 1.29 | 0 | 0 | 0 | not significant |
| 12210 | BIOCARTA_ATRBRCA_PATHWAY                                          | 1.47 | 1.28 | 0 | 0 | 0 | not significant |
| 12211 | LEIN_CHOROID_PLEXUS_MARKERS                                       | 1.47 | 1.28 | 0 | 0 | 0 | not significant |
| 12212 | HUPER_BREAST_BASAL_VS_LUMINAL_DN                                  | 1.47 | 1.27 | 0 | 0 | 0 | not significant |
| 12213 | REACTOME_BICARBONATE_TRANSPORTERS                                 | 1.47 | 1.26 | 0 | 0 | 0 | not significant |
| 12214 | GO_FANCONI_ANAEMIA_NUCLEAR_COMPLEX                                | 1.47 | 1.25 | 0 | 0 | 0 | not significant |
| 12215 | GO_EXTRINSIC_COMPONENT_OF_ENDOSOME_MEMBRANE                       | 1.47 | 1.24 | 0 | 0 | 0 | not significant |
| 12216 | GO_PEPTIDE_CROSS_LINKING                                          | 1.47 | 1.24 | 0 | 0 | 0 | not significant |
| 12217 | GO_VOLTAGE_GATED_CHLORIDE_CHANNEL_ACTIVITY                        | 1.47 | 1.23 | 0 | 0 | 0 | not significant |
| 12218 | REACTOME_METABOLISM_OF_FAT_SOLUBLE_VITAMINS                       | 1.47 | 1.23 | 0 | 0 | 0 | not significant |
| 12219 | GO_CATION_CHLORIDE_SYMPORTER_ACTIVITY                             | 1.47 | 1.22 | 0 | 0 | 0 | not significant |
| 12220 | GESERICK_TERT_TARGETS_DN                                          | 1.47 | 1.21 | 0 | 0 | 0 | not significant |
| 12221 | GO_NEGATIVE_REGULATION_OF_GLYCOPROTEIN_BIOSYNTHETIC_PROCESS       | 1.47 | 1.21 | 0 | 0 | 0 | not significant |
| 12222 | GO_R_SMAD_BINDING                                                 | 1.47 | 1.21 | 0 | 0 | 0 | not significant |
| 12223 | KIM_PTEN_TARGETS_UP                                               | 1.47 | 1.19 | 0 | 0 | 0 | not significant |
| 12224 | MURAKAMI_UV_RESPONSE_6HR_DN                                       | 1.47 | 1.19 | 0 | 0 | 0 | not significant |
| 12225 | GO_REGULATION_OF_TOLL LIKE RECEPTOR_3_SIGNALING_PATHWAY           | 1.47 | 1.17 | 0 | 0 | 0 | not significant |
| 12226 | PLASARI_TGFB1_TARGETS_1HR_UP                                      | 1.47 | 1.17 | 0 | 0 | 0 | not significant |
| 12227 | GO_REGULATION_OF_LYSOSOMAL_LUMEN_PH                               | 1.47 | 1.15 | 0 | 0 | 0 | not significant |
| 12228 | REACTOME_COBALAMIN_CBL_VITAMIN_B12_TRANSPORT_AND_METABOLISM       | 1.47 | 1.11 | 0 | 0 | 0 | not significant |
| 12229 | MILI_PSEUDOPODIA_HAPTOTAXIS_DN                                    | 1.48 | 4    | 0 | 0 | 0 | not significant |
| 12230 | GO_EXTRACELLULAR_MATRIX                                           | 1.48 | 2.83 | 0 | 0 | 0 | not significant |
| 12231 | STK33_DN                                                          | 1.48 | 2.57 | 0 | 0 | 0 | not significant |
| 12232 | TIEN_INTESTINE_PROBIOTICS_24HR_DN                                 | 1.48 | 2.57 | 0 | 0 | 0 | not significant |
| 12233 | PEDRIOLI_MIR31_TARGETS_DN                                         | 1.48 | 2.42 | 0 | 0 | 0 | not significant |
| 12234 | GO_GLYCOPROTEIN_BIOSYNTHETIC_PROCESS                              | 1.48 | 2.41 | 0 | 0 | 0 | not significant |
| 12235 | GO_LEUKOCYTE_PROLIFERATION                                        | 1.48 | 2.17 | 0 | 0 | 0 | not significant |
| 12236 | GO_NEURON_PROJECTION_GUIDANCE                                     | 1.48 | 2.15 | 0 | 0 | 0 | not significant |
| 12237 | TAKEDA_TARGETS_OF_NUP98_HOXA9_FUSION_16D_UP                       | 1.48 | 2    | 0 | 0 | 0 | not significant |
| 12238 | WIENGA_STAT5A_TARGETS_UP                                          | 1.48 | 1.96 | 0 | 0 | 0 | not significant |
| 12239 | GO_GLYCOPROTEIN_METABOLIC_PROCESS                                 | 1.48 | 1.74 | 0 | 0 | 0 | not significant |
| 12240 | HALLMARK_BILE_ACID_METABOLISM                                     | 1.48 | 1.71 | 0 | 0 | 0 | not significant |
| 12241 | MIKKELSEN_MCV6_LCP_WITH_H3K4ME3                                   | 1.48 | 1.71 | 0 | 0 | 0 | not significant |
| 12242 | WANG_HCP_PROSTATE_CANCER                                          | 1.48 | 1.66 | 0 | 0 | 0 | not significant |
| 12243 | GO_POSITIVE_REGULATION_OF_ENDOTHELIAL_CELL_MIGRATION              | 1.48 | 1.61 | 0 | 0 | 0 | not significant |
| 12244 | GO_NEUROTRANSMITTER_METABOLIC_PROCESS                             | 1.48 | 1.58 | 0 | 0 | 0 | not significant |
| 12245 | GO_AMPA_Glutamate_Receptor_Clustering                             | 1.48 | 1.56 | 0 | 0 | 0 | not significant |
| 12246 | GO_MAINTENANCE_OF_PROTEIN_LOCATION_IN_CELL                        | 1.48 | 1.53 | 0 | 0 | 0 | not significant |
| 12247 | MYC_UP.V1_DN                                                      | 1.48 | 1.53 | 0 | 0 | 0 | not significant |
| 12248 | GO_ANTIGEN_PROCESSING_AND_PRESENTATION_ENDOGENOUS_LIPID_ANTIGEN_V | 1.48 | 1.49 | 0 | 0 | 0 | not significant |
| 12249 | KRAS_300_UP.V1_UP                                                 | 1.48 | 1.49 | 0 | 0 | 0 | not significant |
| 12250 | MA_MYELOID_DIFFERENTIATION_DN                                     | 1.48 | 1.48 | 0 | 0 | 0 | not significant |
| 12251 | GO_URIDYLTRANSFERASE_ACTIVITY                                     | 1.48 | 1.47 | 0 | 0 | 0 | not significant |
| 12252 | VILMAS_NOTCH1_TARGETS_UP                                          | 1.48 | 1.46 | 0 | 0 | 0 | not significant |
| 12253 | GO_ARGININE_TRANSMEMBRANE_TRANSPORTER_ACTIVITY                    | 1.48 | 1.44 | 0 | 0 | 0 | not significant |
| 12254 | MEISSNER_BRAIN_HCP_WITH_H3K27ME3                                  | 1.48 | 1.43 | 0 | 0 | 0 | not significant |
| 12255 | KEGG_N_GLYCAN_BIOSYNTHESIS                                        | 1.48 | 1.4  | 0 | 0 | 0 | not significant |
| 12256 | KRASNOSELSKAYA_ILF3_TARGETS_UP                                    | 1.48 | 1.4  | 0 | 0 | 0 | not significant |
| 12257 | CAFFAREL_RESPONSE_TO_THC_UP                                       | 1.48 | 1.39 | 0 | 0 | 0 | not significant |
| 12258 | GO_ACYLGLYCEROL_LIPASE_ACTIVITY                                   | 1.48 | 1.39 | 0 | 0 | 0 | not significant |
| 12259 | GO_HISTONE_H4_K12_ACETYLATION                                     | 1.48 | 1.38 | 0 | 0 | 0 | not significant |
| 12260 | GO_OLIGOSACCHARIDE_METABOLIC_PROCESS                              | 1.48 | 1.38 | 0 | 0 | 0 | not significant |
| 12261 | GO_RESPONSE_TO_CISPLATIN                                          | 1.48 | 1.37 | 0 | 0 | 0 | not significant |
| 12262 | REACTOME_VEGF_LIGAND_RECEPTOR_INTERACTIONS                        | 1.48 | 1.36 | 0 | 0 | 0 | not significant |
| 12263 | REACTOME_GAP_FILLING_DNA_REPAIR_SYNTHESIS_AND_LIGATION_IN_GG_NER  | 1.48 | 1.32 | 0 | 0 | 0 | not significant |
| 12264 | GO_RESPONSE_TO_PAIN                                               | 1.48 | 1.31 | 0 | 0 | 0 | not significant |
| 12265 | BIOCARTA_P53_PATHWAY                                              | 1.48 | 1.3  | 0 | 0 | 0 | not significant |
| 12266 | GO_DOUBLE_STRAND_BREAK_REPAIR_VIA_BREAK_INDUCED_REPLICATION       | 1.48 | 1.3  | 0 | 0 | 0 | not significant |
| 12267 | GO_T_HELPER_17_CELL_LINEAGE_COMMITMENT                            | 1.48 | 1.3  | 0 | 0 | 0 | not significant |
| 12268 | GO_CELLULAR_RESPONSE_TO_LIPOPROTEIN_PARTICLE_STIMULUS             | 1.48 | 1.28 | 0 | 0 | 0 | not significant |
| 12269 | GO_CATENIN_COMPLEX                                                | 1.48 | 1.25 | 0 | 0 | 0 | not significant |
| 12270 | ROETH_TERT_TARGETS_UP                                             | 1.48 | 1.24 | 0 | 0 | 0 | not significant |
| 12271 | GO_RESPONSE_TO_PH                                                 | 1.48 | 1.23 | 0 | 0 | 0 | not significant |
| 12272 | REACTOME_MISMATCH_REPAIR                                          | 1.48 | 1.23 | 0 | 0 | 0 | not significant |
| 12273 | REACTOME_ERYTHROPOIETIN_ACTIVATES_PHOSPHOLIPASE_C_GAMMA_PLGC      | 1.48 | 1.22 | 0 | 0 | 0 | not significant |
| 12274 | VALK_AML_CLUSTER_10                                               | 1.48 | 1.2  | 0 | 0 | 0 | not significant |
| 12275 | GO_GROWTH_INVOLVED_IN_SYMBIOTIC_INTERACTION                       | 1.48 | 1.16 | 0 | 0 | 0 | not significant |
| 12276 | GO_ANIMAL_ORGAN_MATURATION                                        | 1.48 | 1.15 | 0 | 0 | 0 | not significant |
| 12277 | ZHENG_BOUND_BY_FOXP3                                              | 1.49 | 4    | 0 | 0 | 0 | not significant |
| 12278 | DUTERTRE_ESTRADIOL_RESPONSE_24HR_DN                               | 1.49 | 2.89 | 0 | 0 | 0 | not significant |
| 12279 | GO_REGULATION_OF_PEPTIDE_SECRETION                                | 1.49 | 2.6  | 0 | 0 | 0 | not significant |
| 12280 | GO_RESPONSE_TO_ENDOPLASMIC_RETICULUM_STRESS                       | 1.49 | 2.59 | 0 | 0 | 0 | not significant |
| 12281 | HORIUCHI_WTAP_TARGETS_UP                                          | 1.49 | 2.28 | 0 | 0 | 0 | not significant |
| 12282 | BROCKE_APOPTOSIS_REVERSED_BY_IL6                                  | 1.49 | 2.15 | 0 | 0 | 0 | not significant |
| 12283 | SHAFFER_IRF4_TARGETS_IN_MYELOMA_VS_MATURE_B_LYMPHOCYTE            | 1.49 | 1.98 | 0 | 0 | 0 | not significant |
| 12284 | GO_POSITIVE_REGULATION_OF_PEPTIDE_SECRETION                       | 1.49 | 1.97 | 0 | 0 | 0 | not significant |
| 12285 | GO_ALCOHOL_METABOLIC_PROCESS                                      | 1.49 | 1.87 | 0 | 0 | 0 | not significant |
| 12286 | QI_HYPOXIA                                                        | 1.49 | 1.71 | 0 | 0 | 0 | not significant |
| 12287 | GO_B_CELL_MEDIATED_IMMUNITY                                       | 1.49 | 1.64 | 0 | 0 | 0 | not significant |
| 12288 | GO_NATURAL_KILLER_CELL_LECTIN LIKE RECEPTOR_BINDING               | 1.49 | 1.6  | 0 | 0 | 0 | not significant |
| 12289 | GO_SPHINGOLIPID_METABOLIC_PROCESS                                 | 1.49 | 1.6  | 0 | 0 | 0 | not significant |
| 12290 | REACTOME_RESOLUTION_OF_ABASIC_SITES_AP_SITES                      | 1.49 | 1.6  | 0 | 0 | 0 | not significant |
| 12291 | LENAOUR_DENDRITIC_CELL_MATURATION_UP                              | 1.49 | 1.59 | 0 | 0 | 0 | not significant |
| 12292 | DORN_ADENOVIRUS_INFECTION_24HR_DN                                 | 1.49 | 1.53 | 0 | 0 | 0 | not significant |
| 12293 | BILD_SRC_ONCOGENIC_SIGNATURE                                      | 1.49 | 1.52 | 0 | 0 | 0 | not significant |
| 12294 | BOSCO_INTERFERON_INDUCED_ANTIVIRAL_MODULE                         | 1.49 | 1.52 | 0 | 0 | 0 | not significant |
| 12295 | CHARAFE_BREAST_CANCER_BASAL_VS_MESENCHYMAL_UP                     | 1.49 | 1.47 | 0 | 0 | 0 | not significant |
| 12296 | GO_OXIDOREDUCTASE_ACTIVITY_ACTING_ON_THE_CH_CH_GROUP_OF_DONORS    | 1.49 | 1.47 | 0 | 0 | 0 | not significant |
| 12297 | GO_RESPONSE_TO_GRAVITY                                            | 1.49 | 1.45 | 0 | 0 | 0 | not significant |
| 12298 | GO_NEGATIVE_REGULATION_OF_LEUKOCYTE_PROLIFERATION                 | 1.49 | 1.44 | 0 | 0 | 0 | not significant |
| 12299 | GO_INNER_EAR_MORPHOGENESIS                                        | 1.49 | 1.43 | 0 | 0 | 0 | not significant |
| 12300 | GO_CELLULAR_RESPONSE_TO_DEXMETHASONE_STIMULUS                     | 1.49 | 1.42 | 0 | 0 | 0 | not significant |
| 12301 | WILLIAMS_ESR1_TARGETS_DN                                          | 1.49 | 1.42 | 0 | 0 | 0 | not significant |
| 12302 | GO_UNSATURATED_FATTY_ACID_METABOLIC_PROCESS                       | 1.49 | 1.4  | 0 | 0 | 0 | not significant |
| 12303 | SENGUPTA_NASOPHARYNGEAL_CARCINOMA_WITH_LMP1_DN                    | 1.49 | 1.4  | 0 | 0 | 0 | not significant |
| 12304 | GO_POSITIVE_REGULATION_OF_ISOTYPE_SWITCHING_TO_IgG_ISOTYPES       | 1.49 | 1.38 | 0 | 0 | 0 | not significant |
| 12305 | GO_RESPONSE_TO_CAMPTOTHECIN                                       | 1.49 | 1.38 | 0 | 0 | 0 | not significant |

|       |                                                                 |      |      |   |   |   |                 |
|-------|-----------------------------------------------------------------|------|------|---|---|---|-----------------|
| 12306 | REACTOME_GLUTATHIONE_CONJUGATION                                | 1.49 | 1.36 | 0 | 0 | 0 | not significant |
| 12307 | SU_THYMUS                                                       | 1.49 | 1.35 | 0 | 0 | 0 | not significant |
| 12308 | GO_RESPONSE_TO_MINERALOCORTICOID                                | 1.49 | 1.34 | 0 | 0 | 0 | not significant |
| 12309 | GRAHAM_NORMAL_QUIESCENT_VS_NORMAL_DIVIDING_UP                   | 1.49 | 1.34 | 0 | 0 | 0 | not significant |
| 12310 | GO_ANTIGEN_PROCESSING_AND_PRESENTATION_OF_ENDOGENOUS_PEPTIDE_AN | 1.49 | 1.33 | 0 | 0 | 0 | not significant |
| 12311 | RASHI_NFKB1_TARGETS                                             | 1.49 | 1.33 | 0 | 0 | 0 | not significant |
| 12312 | REACTOME_GROWTH_HORMONE_RECEPTOR_SIGNALING                      | 1.49 | 1.33 | 0 | 0 | 0 | not significant |
| 12313 | GO_HYPERSENSITIVITY                                             | 1.49 | 1.32 | 0 | 0 | 0 | not significant |
| 12314 | GO_SIGNAL_RECOGNITION_PARTICLE_RECEPTOR_COMPLEX                 | 1.49 | 1.32 | 0 | 0 | 0 | not significant |
| 12315 | CHO_NR4A1_TARGETS                                               | 1.49 | 1.31 | 0 | 0 | 0 | not significant |
| 12316 | GO_LOW_DENSITY_LIPOPROTEIN_PARTICLE_RECEPTOR_ACTIVITY           | 1.49 | 1.31 | 0 | 0 | 0 | not significant |
| 12317 | SA_CASPASE_CASCADE                                              | 1.49 | 1.31 | 0 | 0 | 0 | not significant |
| 12318 | ZHENG_FOXP3_TARGETS_UP                                          | 1.49 | 1.31 | 0 | 0 | 0 | not significant |
| 12319 | GO_IMMUNOLOGICAL_MEMORY_PROCESS                                 | 1.49 | 1.3  | 0 | 0 | 0 | not significant |
| 12320 | GO_REGULATION_OF_STEROL_TRANSPORT                               | 1.49 | 1.3  | 0 | 0 | 0 | not significant |
| 12321 | GO_MITRAL_VALVE_DEVELOPMENT                                     | 1.49 | 1.29 | 0 | 0 | 0 | not significant |
| 12322 | GO_NAD_DEPENDENT_PROTEIN_DEACETYLASE_ACTIVITY                   | 1.49 | 1.29 | 0 | 0 | 0 | not significant |
| 12323 | VANDESLUIS_COMMD1_TARGETS_GROUP_4_DN                            | 1.49 | 1.28 | 0 | 0 | 0 | not significant |
| 12324 | NUNODA_RESPONSE_TO_DASATINIB_IMATINIB_DN                        | 1.49 | 1.24 | 0 | 0 | 0 | not significant |
| 12325 | GO_ENDOPLASMIC_RETICULUM_QUALITY_CONTROL_COMPARTMENT            | 1.49 | 1.22 | 0 | 0 | 0 | not significant |
| 12326 | GO_NUCLEAR_OUTER_MEMBRANE_ENDOPLASMIC_RETICULUM_MEMBRANE_NETW   | 1.50 | 4    | 0 | 0 | 0 | Enhanced        |
| 12327 | PHONG_TNF_RESPONSE_NOT_VIA_P38                                  | 1.50 | 2.88 | 0 | 0 | 0 | Enhanced        |
| 12328 | MCBRYAN_PUBERTAL_BREAST_4_5WK_UP                                | 1.50 | 2.24 | 0 | 0 | 0 | Enhanced        |
| 12329 | HALLMARK_ESTROGEN_RESPONSE_LATE                                 | 1.50 | 1.93 | 0 | 0 | 0 | Enhanced        |
| 12330 | ROVERSI_GLIOMA_COPY_NUMBER_UP                                   | 1.50 | 1.83 | 0 | 0 | 0 | Enhanced        |
| 12331 | GO_NEGATIVE_REGULATION_OF_INFLAMMATORY_RESPONSE                 | 1.50 | 1.76 | 0 | 0 | 0 | Enhanced        |
| 12332 | REACTOME_ACTIVATION_OF_PPARGC1A_PGC_1ALPHA_BY_PHOSPHORYLATION   | 1.50 | 1.71 | 0 | 0 | 0 | Enhanced        |
| 12333 | SLEBOS_HEAD_AND_NECK_CANCER_WITH_HP4_UP                         | 1.50 | 1.7  | 0 | 0 | 0 | Enhanced        |
| 12334 | GO_COLLAGEN_BINDING                                             | 1.50 | 1.64 | 0 | 0 | 0 | Enhanced        |
| 12335 | GO_ATP_BINDING_CASSETTE_ABC_TRANSPORTER_COMPLEX                 | 1.50 | 1.61 | 0 | 0 | 0 | Enhanced        |
| 12336 | GERY_CEBP_TARGETS                                               | 1.50 | 1.6  | 0 | 0 | 0 | Enhanced        |
| 12337 | GO_EXTRACELLULAR_MATRIX_STRUCTURAL_CONSTITUENT                  | 1.50 | 1.59 | 0 | 0 | 0 | Enhanced        |
| 12338 | NADLER_OBESITY_UP                                               | 1.50 | 1.54 | 0 | 0 | 0 | Enhanced        |
| 12339 | HILLION_HMG1_TARGETS                                            | 1.50 | 1.51 | 0 | 0 | 0 | Enhanced        |
| 12340 | GO_REGULATION_OF_CHRONIC_INFLAMMATORY_RESPONSE                  | 1.50 | 1.49 | 0 | 0 | 0 | Enhanced        |
| 12341 | LEE_LIVER_CANCER_ACOX1_DN                                       | 1.50 | 1.49 | 0 | 0 | 0 | Enhanced        |
| 12342 | GO_NEGATIVE_REGULATION_OF_P38MAPK_CASCADE                       | 1.50 | 1.47 | 0 | 0 | 0 | Enhanced        |
| 12343 | CHIANG_LIVER_CANCER_SUBCLASS_INTERFERON_UP                      | 1.50 | 1.46 | 0 | 0 | 0 | Enhanced        |
| 12344 | CHR4Q21                                                         | 1.50 | 1.46 | 0 | 0 | 0 | Enhanced        |
| 12345 | DAZARD_UV_RESPONSE_CLUSTER_G24                                  | 1.50 | 1.46 | 0 | 0 | 0 | Enhanced        |
| 12346 | GO_SYMPATHETIC_NERVOUS_SYSTEM_DEVELOPMENT                       | 1.50 | 1.46 | 0 | 0 | 0 | Enhanced        |
| 12347 | GO_REGULATION_OF_TRANSCRIPTION_INVOLVED_IN_CELL_FATE_COMMITMENT | 1.50 | 1.44 | 0 | 0 | 0 | Enhanced        |
| 12348 | GROSS_HYPOXIA_VIA_ELK3_ONLY_UP                                  | 1.50 | 1.44 | 0 | 0 | 0 | Enhanced        |
| 12349 | FOURNIER_ACINAR_DEVELOPMENT_LATE_UP                             | 1.50 | 1.42 | 0 | 0 | 0 | Enhanced        |
| 12350 | STREICHER_LSM1_TARGETS_UP                                       | 1.50 | 1.42 | 0 | 0 | 0 | Enhanced        |
| 12351 | GO_CELLULAR_MODIFIED_AMINO_ACID_BIOSYNTHETIC_PROCESS            | 1.50 | 1.41 | 0 | 0 | 0 | Enhanced        |
| 12352 | GO_DIACYLGLYCEROL_METABOLIC_PROCESS                             | 1.50 | 1.41 | 0 | 0 | 0 | Enhanced        |
| 12353 | GO_ATPASE_DEPENDENT_TRANSMEMBRANE_TRANSPORT_COMPLEX             | 1.50 | 1.38 | 0 | 0 | 0 | Enhanced        |
| 12354 | WANG_METASTASIS_OF_BREAST_CANCER                                | 1.50 | 1.38 | 0 | 0 | 0 | Enhanced        |
| 12355 | GO_ACID_THIOL_LIGASE_ACTIVITY                                   | 1.50 | 1.37 | 0 | 0 | 0 | Enhanced        |
| 12356 | GO_FIBRONECTIN_BINDING                                          | 1.50 | 1.37 | 0 | 0 | 0 | Enhanced        |
| 12357 | GO_REGULATION_OF_POSITIVE_CHEMOTAXIS                            | 1.50 | 1.37 | 0 | 0 | 0 | Enhanced        |
| 12358 | AIYAR_COBRA1_TARGETS_UP                                         | 1.50 | 1.36 | 0 | 0 | 0 | Enhanced        |
| 12359 | GO_ANION_CATION_SYMPORTER_ACTIVITY                              | 1.50 | 1.36 | 0 | 0 | 0 | Enhanced        |
| 12360 | GO_LIPID_ANTIGEN_BINDING                                        | 1.50 | 1.36 | 0 | 0 | 0 | Enhanced        |
| 12361 | BIOCARTA_LYMPHOCYTE_PATHWAY                                     | 1.50 | 1.35 | 0 | 0 | 0 | Enhanced        |
| 12362 | GALL_TP53_TARGETS_APOPTOTIC_UP                                  | 1.50 | 1.35 | 0 | 0 | 0 | Enhanced        |
| 12363 | GO ASPARTATE_FAMILY_AMINO_ACID_METABOLIC_PROCESS                | 1.50 | 1.34 | 0 | 0 | 0 | Enhanced        |
| 12364 | GO_T_CELL_SELECTION                                             | 1.50 | 1.34 | 0 | 0 | 0 | Enhanced        |
| 12365 | GO_PHOSPHATIDYLCHOLINE_CATABOLIC_PROCESS                        | 1.50 | 1.32 | 0 | 0 | 0 | Enhanced        |
| 12366 | GO_LUNG_EPITHELIUM_DEVELOPMENT                                  | 1.50 | 1.31 | 0 | 0 | 0 | Enhanced        |
| 12367 | GO_RESPONSE_TO_INTERLEUKIN_2                                    | 1.50 | 1.3  | 0 | 0 | 0 | Enhanced        |
| 12368 | GO_SYNCYTIUM_FORMATION                                          | 1.50 | 1.3  | 0 | 0 | 0 | Enhanced        |
| 12369 | GO_HEPATOCTYTE_DIFFERENTIATION                                  | 1.50 | 1.28 | 0 | 0 | 0 | Enhanced        |
| 12370 | GO_SYNAPSIS                                                     | 1.50 | 1.27 | 0 | 0 | 0 | Enhanced        |
| 12371 | REACTOME_LEADING_STRAND_SYNTHESIS                               | 1.50 | 1.27 | 0 | 0 | 0 | Enhanced        |
| 12372 | TURJANSKI_MAPK1_AND_MAPK2_TARGETS                               | 1.50 | 1.27 | 0 | 0 | 0 | Enhanced        |
| 12373 | GO_AMINO_SUGAR_CATABOLIC_PROCESS                                | 1.50 | 1.25 | 0 | 0 | 0 | Enhanced        |
| 12374 | GO_CHRONIC_INFLAMMATORY_RESPONSE                                | 1.50 | 1.24 | 0 | 0 | 0 | Enhanced        |
| 12375 | ENK_UV_RESPONSE_EPIDERMIS_DN                                    | 1.51 | 4    | 0 | 0 | 0 | Enhanced        |
| 12376 | GO_CYTOKINE_PRODUCTION                                          | 1.51 | 4    | 0 | 0 | 0 | Enhanced        |
| 12377 | GO_RESPONSE_TO_VIRUS                                            | 1.51 | 2.87 | 0 | 0 | 0 | Enhanced        |
| 12378 | GO_POSITIVE_REGULATION_OF_CYTOKINE_PRODUCTION                   | 1.51 | 2.6  | 0 | 0 | 0 | Enhanced        |
| 12379 | GO_DEFENSE_RESPONSE_TO_OTHER_ORGANISM                           | 1.51 | 2.59 | 0 | 0 | 0 | Enhanced        |
| 12380 | CHR11Q13                                                        | 1.51 | 2.56 | 0 | 0 | 0 | Enhanced        |
| 12381 | GO_SECRETORY_GRANULE_MEMBRANE                                   | 1.51 | 2.39 | 0 | 0 | 0 | Enhanced        |
| 12382 | GRAESSMANN_APOPTOSIS_BY_SERUM_DEPRIVATION_DN                    | 1.51 | 2.38 | 0 | 0 | 0 | Enhanced        |
| 12383 | GO_MEMBRANE_LIPID_METABOLIC_PROCESS                             | 1.51 | 2.24 | 0 | 0 | 0 | Enhanced        |
| 12384 | GO_VACUOLAR_LUMEN                                               | 1.51 | 1.94 | 0 | 0 | 0 | Enhanced        |
| 12385 | KRAS.600_UP.V1_DN                                               | 1.51 | 1.87 | 0 | 0 | 0 | Enhanced        |
| 12386 | MEL18_DN.V1_UP                                                  | 1.51 | 1.83 | 0 | 0 | 0 | Enhanced        |
| 12387 | GO_HORMONE_METABOLIC_PROCESS                                    | 1.51 | 1.82 | 0 | 0 | 0 | Enhanced        |
| 12388 | BMI1_DN.V1_UP                                                   | 1.51 | 1.8  | 0 | 0 | 0 | Enhanced        |
| 12389 | GO_RESPONSE_TO_AMINO_ACID                                       | 1.51 | 1.77 | 0 | 0 | 0 | Enhanced        |
| 12390 | PID_IL2_IPATHWAY                                                | 1.51 | 1.69 | 0 | 0 | 0 | Enhanced        |
| 12391 | GO_DIGESTIVE_SYSTEM_DEVELOPMENT                                 | 1.51 | 1.67 | 0 | 0 | 0 | Enhanced        |
| 12392 | CRX_NRL_DN.V1_DN                                                | 1.51 | 1.64 | 0 | 0 | 0 | Enhanced        |
| 12393 | REACTOME_REGULATION_OF_TNFR1_SIGNALING                          | 1.51 | 1.58 | 0 | 0 | 0 | Enhanced        |
| 12394 | BIOCARTA_NKT_PATHWAY                                            | 1.51 | 1.52 | 0 | 0 | 0 | Enhanced        |
| 12395 | GO_ARGININE_TRANSPORT                                           | 1.51 | 1.52 | 0 | 0 | 0 | Enhanced        |
| 12396 | GO_METALLOENDOPEPTIDASE_INHIBITOR_ACTIVITY                      | 1.51 | 1.52 | 0 | 0 | 0 | Enhanced        |
| 12397 | GO_RESPONSE_TO_OLEIC_ACID                                       | 1.51 | 1.5  | 0 | 0 | 0 | Enhanced        |
| 12398 | GO_CELLULAR_HORMONE_METABOLIC_PROCESS                           | 1.51 | 1.49 | 0 | 0 | 0 | Enhanced        |
| 12399 | HINATA_NFKB_TARGETS_KERATINOCYTE_UP                             | 1.51 | 1.49 | 0 | 0 | 0 | Enhanced        |
| 12400 | MCBRYAN_PUBERTAL_TGFB1_TARGETS_DN                               | 1.51 | 1.47 | 0 | 0 | 0 | Enhanced        |
| 12401 | DORN_ADENOVIRUS_INFECTION_32HR_DN                               | 1.51 | 1.46 | 0 | 0 | 0 | Enhanced        |
| 12402 | GO_RESPONSE_TO_DEXAMETHASONE                                    | 1.51 | 1.44 | 0 | 0 | 0 | Enhanced        |
| 12403 | BIOCARTA_MONOCYTE_PATHWAY                                       | 1.51 | 1.43 | 0 | 0 | 0 | Enhanced        |
| 12404 | GAURNIER_PSM4_TARGETS                                           | 1.51 | 1.42 | 0 | 0 | 0 | Enhanced        |
| 12405 | GO_JCOSANOID_BIOSYNTHETIC_PROCESS                               | 1.51 | 1.4  | 0 | 0 | 0 | Enhanced        |
| 12406 | WHITESIDE_CISPLATIN_RESISTANCE_DN                               | 1.51 | 1.4  | 0 | 0 | 0 | Enhanced        |
| 12407 | GO_GLUTATHIONE_TRANSFERASE_ACTIVITY                             | 1.51 | 1.39 | 0 | 0 | 0 | Enhanced        |
| 12408 | GO_REGULATION_OF_AMYLOID_BETA_CLEARANCE                         | 1.51 | 1.38 | 0 | 0 | 0 | Enhanced        |
| 12409 | GO_PHOSPHATIDYLSERINE_METABOLIC_PROCESS                         | 1.51 | 1.37 | 0 | 0 | 0 | Enhanced        |
| 12410 | GO_SULFATE_TRANSMEMBRANE_TRANSPORTER_ACTIVITY                   | 1.51 | 1.37 | 0 | 0 | 0 | Enhanced        |
| 12411 | SASL_RESISTANCE_TO_NEOPLASTIC_TRANSFORMATION                    | 1.51 | 1.37 | 0 | 0 | 0 | Enhanced        |
| 12412 | GO_RESPONSE_TO_CORTICOSTERONE                                   | 1.51 | 1.36 | 0 | 0 | 0 | Enhanced        |
| 12413 | MIKKELSEN_IPS_WITH_HCP_H3K27ME3                                 | 1.51 | 1.35 | 0 | 0 | 0 | Enhanced        |
| 12414 | GYORFFY_DOXORUBICIN_RESISTANCE                                  | 1.51 | 1.33 | 0 | 0 | 0 | Enhanced        |

|       |                                                                   |      |      |   |   |   |          |
|-------|-------------------------------------------------------------------|------|------|---|---|---|----------|
| 12415 | GO_EXTRACELLULAR_LIGAND_GATED_ION_CHANNEL_ACTIVITY                | 1.51 | 1.31 | 0 | 0 | 0 | Enhanced |
| 12416 | GO_THROMBIN_ACTIVATED_RECEPTOR_SIGNALING_PATHWAY                  | 1.51 | 1.31 | 0 | 0 | 0 | Enhanced |
| 12417 | ISSAeva_MLL2_TARGETS                                              | 1.51 | 1.31 | 0 | 0 | 0 | Enhanced |
| 12418 | GO_ADRENERGIC_RECEPTOR_SIGNALING_PATHWAY                          | 1.51 | 1.3  | 0 | 0 | 0 | Enhanced |
| 12419 | GO_INTEGRAL_COMPONENT_OF_SYNAPTIC_VESICLE_MEMBRANE                | 1.51 | 1.28 | 0 | 0 | 0 | Enhanced |
| 12420 | GO_STEROID_DEHYDROGENASE_ACTIVITY                                 | 1.51 | 1.24 | 0 | 0 | 0 | Enhanced |
| 12421 | GO_REGULATION_OF_HISTONE_H3_K27_METHYLATION                       | 1.51 | 1.19 | 0 | 0 | 0 | Enhanced |
| 12422 | GO_INTRINSIC_COMPONENT_OF_ORGANELLE_MEMBRANE                      | 1.52 | 4    | 0 | 0 | 0 | Enhanced |
| 12423 | GO_LEUKOCYTE_MEDIATED_IMMUNITY                                    | 1.52 | 4    | 0 | 0 | 0 | Enhanced |
| 12424 | PHONG_TNF_RESPONSE_VIA_P38_COMPLETE                               | 1.52 | 4    | 0 | 0 | 0 | Enhanced |
| 12425 | SCHAEFFER_PROSTATE_DEVELOPMENT_48HR_UP                            | 1.52 | 2.86 | 0 | 0 | 0 | Enhanced |
| 12426 | GO_RESPONSE_TO_ACID_CHEMICAL                                      | 1.52 | 2.84 | 0 | 0 | 0 | Enhanced |
| 12427 | DOUGLAS_BMI1_TARGETS_DN                                           | 1.52 | 2.42 | 0 | 0 | 0 | Enhanced |
| 12428 | GO_TRANSFERASE_ACTIVITY_TRANSFERRING_GLYCOSYL_GROUPS              | 1.52 | 2.09 | 0 | 0 | 0 | Enhanced |
| 12429 | PRG2_SUZ12_UP.V1_UP                                               | 1.52 | 2.05 | 0 | 0 | 0 | Enhanced |
| 12430 | HSIAO_LIVER_SPECIFIC_GENES                                        | 1.52 | 1.98 | 0 | 0 | 0 | Enhanced |
| 12431 | KEGG_HYPERTROPHIC_CARDIOMYOPATHY_HCM                              | 1.52 | 1.8  | 0 | 0 | 0 | Enhanced |
| 12432 | GO_AMINO_ACID_TRANSPORT                                           | 1.52 | 1.79 | 0 | 0 | 0 | Enhanced |
| 12433 | BMI1_DN_MEL18_DN.V1_DN                                            | 1.52 | 1.74 | 0 | 0 | 0 | Enhanced |
| 12434 | SMID_BREAST_CANCER_ERBB2_UP                                       | 1.52 | 1.74 | 0 | 0 | 0 | Enhanced |
| 12435 | GO_MAINTENANCE_OF_PROTEIN_LOCALIZATION_IN_ORGANELLE               | 1.52 | 1.72 | 0 | 0 | 0 | Enhanced |
| 12436 | GO_REGULATION_OF_RECEPTOR_SIGNALING_PATHWAY_VIA_STAT              | 1.52 | 1.67 | 0 | 0 | 0 | Enhanced |
| 12437 | GO_EPITHELIAL_CELL_APOPTOTIC_PROCESS                              | 1.52 | 1.65 | 0 | 0 | 0 | Enhanced |
| 12438 | GO_POSITIVE_REGULATION_OF_PHAGOCYTOSIS                            | 1.52 | 1.63 | 0 | 0 | 0 | Enhanced |
| 12439 | GO_AMMONIUM_ION_METABOLIC_PROCESS                                 | 1.52 | 1.62 | 0 | 0 | 0 | Enhanced |
| 12440 | LUI_THYROID_CANCER_CLUSTER_1                                      | 1.52 | 1.62 | 0 | 0 | 0 | Enhanced |
| 12441 | GO_SERINE_FAMILY_AMINO_ACID_METABOLIC_PROCESS                     | 1.52 | 1.61 | 0 | 0 | 0 | Enhanced |
| 12442 | NKOLSKY_BREAST_CANCER_22Q13_AMPLICON                              | 1.52 | 1.59 | 0 | 0 | 0 | Enhanced |
| 12443 | GO_SYNAPTIC_TRANSMISSION_GlutAMATERGIC                            | 1.52 | 1.58 | 0 | 0 | 0 | Enhanced |
| 12444 | GO_POSITIVE_REGULATION_OF_HISTONE_H3_K27_METHYLATION              | 1.52 | 1.55 | 0 | 0 | 0 | Enhanced |
| 12445 | HALMOS_CEBPA_TARGETS_UP                                           | 1.52 | 1.55 | 0 | 0 | 0 | Enhanced |
| 12446 | REACTOME_NUCLEOTIDE LIKE PURINERGIC RECEPTORS                     | 1.52 | 1.54 | 0 | 0 | 0 | Enhanced |
| 12447 | MOSERLE_IFNA_RESPONSE                                             | 1.52 | 1.51 | 0 | 0 | 0 | Enhanced |
| 12448 | GO_ACYLGLYCEROL_METABOLIC_PROCESS                                 | 1.52 | 1.5  | 0 | 0 | 0 | Enhanced |
| 12449 | GO_ARACHIDONIC_ACID_SECRETION                                     | 1.52 | 1.5  | 0 | 0 | 0 | Enhanced |
| 12450 | GO_DNA_STRAND_RENATURATION                                        | 1.52 | 1.5  | 0 | 0 | 0 | Enhanced |
| 12451 | GO_CD40_SIGNALING_PATHWAY                                         | 1.52 | 1.47 | 0 | 0 | 0 | Enhanced |
| 12452 | GO_INORGANIC_ANION_EXCHANGER_ACTIVITY                             | 1.52 | 1.47 | 0 | 0 | 0 | Enhanced |
| 12453 | KEGG_ALANINE_ASPARTATE_AND_GlutAMATE_METABOLISM                   | 1.52 | 1.47 | 0 | 0 | 0 | Enhanced |
| 12454 | KRAS.BREAST_UP.V1_UP                                              | 1.52 | 1.47 | 0 | 0 | 0 | Enhanced |
| 12455 | GO_INTERLEUKIN_23_MEDIATED_SIGNALING_PATHWAY                      | 1.52 | 1.46 | 0 | 0 | 0 | Enhanced |
| 12456 | GO_NEGATIVE_REGULATION_OF_CELL_KILLING                            | 1.52 | 1.46 | 0 | 0 | 0 | Enhanced |
| 12457 | GO_STEROID_DEHYDROGENASE_ACTIVITY_ACTING_ON_THE_CH_OH_GROUP_OF_   | 1.52 | 1.46 | 0 | 0 | 0 | Enhanced |
| 12458 | REACTOME_ADHERENS_JUNCTIONS_INTERACTIONS                          | 1.52 | 1.45 | 0 | 0 | 0 | Enhanced |
| 12459 | GO_OLIGOSACCHARYL_TRANSFERASE_ACTIVITY                            | 1.52 | 1.44 | 0 | 0 | 0 | Enhanced |
| 12460 | BROWNE_HCMV_INFECTION_30MIN_UP                                    | 1.52 | 1.43 | 0 | 0 | 0 | Enhanced |
| 12461 | GO_DERMATAN_SULFATE_PROTEOGLYCAN_BIOSYNTHETIC_PROCESS             | 1.52 | 1.42 | 0 | 0 | 0 | Enhanced |
| 12462 | KEGG_TERPENOID_BACKBONE_BIOSYNTHESIS                              | 1.52 | 1.42 | 0 | 0 | 0 | Enhanced |
| 12463 | BIOCARTA_ARAP_PATHWAY                                             | 1.52 | 1.41 | 0 | 0 | 0 | Enhanced |
| 12464 | GARGALOVIC_RESPONSE_TO_OXIDIZED_PHOSPHOLIPIDS_PINK_DN             | 1.52 | 1.4  | 0 | 0 | 0 | Enhanced |
| 12465 | REACTOME_COLLAGEN_BIOSYNTHESIS_AND_MODIFYING_ENZYMES              | 1.52 | 1.4  | 0 | 0 | 0 | Enhanced |
| 12466 | REACTOME_ESTROGEN_DEPENDENT_NUCLEAR_EVENTS_DOWNSTREAM_OF_ESR      | 1.52 | 1.4  | 0 | 0 | 0 | Enhanced |
| 12467 | GO_PROTEIN_POLYGLUTAMYLATION                                      | 1.52 | 1.38 | 0 | 0 | 0 | Enhanced |
| 12468 | TURASHVILI_BREAST_DUCTAL_CARCINOMA_VS_LOBULAR_NORMAL_DN           | 1.52 | 1.38 | 0 | 0 | 0 | Enhanced |
| 12469 | GO_REGULATION_OF_VASCULAR_PERMEABILITY                            | 1.52 | 1.32 | 0 | 0 | 0 | Enhanced |
| 12470 | BIOCARTA_REELIN_PATHWAY                                           | 1.52 | 1.31 | 0 | 0 | 0 | Enhanced |
| 12471 | GO_ACUTE_INFLAMMATORY_RESPONSE_TO_ANTIgenic_STIMULUS              | 1.52 | 1.27 | 0 | 0 | 0 | Enhanced |
| 12472 | MEK_UP.V1_UP                                                      | 1.53 | 2.54 | 0 | 0 | 0 | Enhanced |
| 12473 | RODRIGUES_NTN1_TARGETS_DN                                         | 1.53 | 2.53 | 0 | 0 | 0 | Enhanced |
| 12474 | GO_POSITIVE_REGULATION_OF_INFLAMMATORY_RESPONSE                   | 1.53 | 2.12 | 0 | 0 | 0 | Enhanced |
| 12475 | GO_MONOVALENT_INORGANIC_CATION_HOMEOSTASIS                        | 1.53 | 2    | 0 | 0 | 0 | Enhanced |
| 12476 | DELYS_THYROID_CANCER_DN                                           | 1.53 | 1.99 | 0 | 0 | 0 | Enhanced |
| 12477 | GO_LEUKOCYTE_CHEMOTAXIS                                           | 1.53 | 1.98 | 0 | 0 | 0 | Enhanced |
| 12478 | GO_ANNEALING_HELICASE_ACTIVITY                                    | 1.53 | 1.87 | 0 | 0 | 0 | Enhanced |
| 12479 | GO_MYELOID_LEUKOCYTE_MIGRATION                                    | 1.53 | 1.87 | 0 | 0 | 0 | Enhanced |
| 12480 | KATSANOULAVL1_TARGETS_UP                                          | 1.53 | 1.86 | 0 | 0 | 0 | Enhanced |
| 12481 | SRC_UP.V1_UP                                                      | 1.53 | 1.85 | 0 | 0 | 0 | Enhanced |
| 12482 | SIRNA_EIF4G1_UP                                                   | 1.53 | 1.83 | 0 | 0 | 0 | Enhanced |
| 12483 | GO_REGULATION_OF_FAT_CELL_DIFFERENTIATION                         | 1.53 | 1.8  | 0 | 0 | 0 | Enhanced |
| 12484 | GO_PERIKARYON                                                     | 1.53 | 1.78 | 0 | 0 | 0 | Enhanced |
| 12485 | TONKS_TARGETS_OF_RUNX1_RUNX1T1_FUSION_ERYTHROCYTE_UP              | 1.53 | 1.76 | 0 | 0 | 0 | Enhanced |
| 12486 | GO_AUTOPHAGOSOME                                                  | 1.53 | 1.75 | 0 | 0 | 0 | Enhanced |
| 12487 | REACTOME_INTERLEUKIN_1_PROCESSING                                 | 1.53 | 1.67 | 0 | 0 | 0 | Enhanced |
| 12488 | GO_NEPHRIC_DUCT_DEVELOPMENT                                       | 1.53 | 1.66 | 0 | 0 | 0 | Enhanced |
| 12489 | BILBAN_B_CLL_LPL_DN                                               | 1.53 | 1.64 | 0 | 0 | 0 | Enhanced |
| 12490 | BIOCARTA_LYM_PATHWAY                                              | 1.53 | 1.6  | 0 | 0 | 0 | Enhanced |
| 12491 | GO_ANTIgen_PROCESSING_AND_PRESENTATION_OF_PEPTIDE_ANTIgen_VIA_MHC | 1.53 | 1.56 | 0 | 0 | 0 | Enhanced |
| 12492 | TONKS_TARGETS_OF_RUNX1_RUNX1T1_FUSION_MONOCYTE_DN                 | 1.53 | 1.55 | 0 | 0 | 0 | Enhanced |
| 12493 | GO_NEUROINFLAMMATORY_RESPONSE                                     | 1.53 | 1.54 | 0 | 0 | 0 | Enhanced |
| 12494 | GO_SPERM_AXONEME_ASSEMBLY                                         | 1.53 | 1.54 | 0 | 0 | 0 | Enhanced |
| 12495 | LEE_EARLY_T_LYMPHOCYTE_DN                                         | 1.53 | 1.54 | 0 | 0 | 0 | Enhanced |
| 12496 | GO_SKELETAL_MUSCLE_CELL_DIFFERENTIATION                           | 1.53 | 1.5  | 0 | 0 | 0 | Enhanced |
| 12497 | GO_BETA_2_MICROGLOBULIN_BINDING                                   | 1.53 | 1.47 | 0 | 0 | 0 | Enhanced |
| 12498 | REACTOME_RESOLUTION_OF_D_LOOP_STRUCTURES_THROUGH_SYNTHESIS_DEP    | 1.53 | 1.47 | 0 | 0 | 0 | Enhanced |
| 12499 | LEE_DOUBLE_POLAR_THYMOCYTE                                        | 1.53 | 1.46 | 0 | 0 | 0 | Enhanced |
| 12500 | OXFORD_RALA_TARGETS_UP                                            | 1.53 | 1.46 | 0 | 0 | 0 | Enhanced |
| 12501 | REACTOME_INTERLEUKIN_23_SIGNALING                                 | 1.53 | 1.46 | 0 | 0 | 0 | Enhanced |
| 12502 | GO_OXIDOREDUCTASE_ACTIVITY_ACTING_ON_PAIRIED_DONORS_WITH_INCORPOR | 1.53 | 1.45 | 0 | 0 | 0 | Enhanced |
| 12503 | REACTOME_ALPHA_LINOLENIC_OMEGA3_AND_LINOLEIC_OMEGA6_ACID_METABOL  | 1.53 | 1.45 | 0 | 0 | 0 | Enhanced |
| 12504 | GO_MONOCYTE_CHEMOTAXIS                                            | 1.53 | 1.44 | 0 | 0 | 0 | Enhanced |
| 12505 | GO_REGULATION_OF_NMDA_RECEPTOR_ACTIVITY                           | 1.53 | 1.44 | 0 | 0 | 0 | Enhanced |
| 12506 | AMIT_EGF_RESPONSE_20_HELA                                         | 1.53 | 1.41 | 0 | 0 | 0 | Enhanced |
| 12507 | KEGG_TYPE_1_DIABETES_MELLITUS                                     | 1.53 | 1.41 | 0 | 0 | 0 | Enhanced |
| 12508 | OSADA_ASCL1_TARGETS_DN                                            | 1.53 | 1.41 | 0 | 0 | 0 | Enhanced |
| 12509 | BIOCARTA_BARD1_PATHWAY                                            | 1.53 | 1.39 | 0 | 0 | 0 | Enhanced |
| 12510 | BIOCARTA_IL2_PATHWAY                                              | 1.53 | 1.37 | 0 | 0 | 0 | Enhanced |
| 12511 | SARTIPY_NORMAL_AT_INSULIN_RESISTANCE_DN                           | 1.53 | 1.33 | 0 | 0 | 0 | Enhanced |
| 12512 | GO_ESTABLISHMENT_OF_PLANAR_POLARITY_INVOLVED_IN_NEURAL_TUBE_CLOS  | 1.53 | 1.27 | 0 | 0 | 0 | Enhanced |
| 12513 | CHARAFE_BREAST_CANCER_LUMINAL_VS_MESENCHYMAL_UP                   | 1.54 | 4    | 0 | 0 | 0 | Enhanced |
| 12514 | GO_CATION_TRANSMEMBRANE_TRANSPORTER_ACTIVITY                      | 1.54 | 4    | 0 | 0 | 0 | Enhanced |
| 12515 | GO_SMALL_MOLECULE_BIOSYNTHETIC_PROCESS                            | 1.54 | 4    | 0 | 0 | 0 | Enhanced |
| 12516 | GOBERT_OLIGODENDROCYTE_DIFFERENTIATION_DN                         | 1.54 | 4    | 0 | 0 | 0 | Enhanced |
| 12517 | PARENT_MTOR_SIGNALING_UP                                          | 1.54 | 4    | 0 | 0 | 0 | Enhanced |
| 12518 | LEF1_UP.V1_DN                                                     | 1.54 | 2.82 | 0 | 0 | 0 | Enhanced |
| 12519 | WILCOX_RESPONSE_TO_PROGESTERONE_UP                                | 1.54 | 2.24 | 0 | 0 | 0 | Enhanced |
| 12520 | CHYLA_CBFAT3_TARGETS_DN                                           | 1.54 | 2.15 | 0 | 0 | 0 | Enhanced |
| 12521 | GO_REGULATION_OF_CHEMOTAXIS                                       | 1.54 | 2.12 | 0 | 0 | 0 | Enhanced |
| 12522 | GO_REGULATION_OF_ENDOTHELIAL_CELL_MIGRATION                       | 1.54 | 1.97 | 0 | 0 | 0 | Enhanced |
| 12523 | IYENGAR_RESPONSE_TO_ADIPOCYTE_FACTORS                             | 1.54 | 1.72 | 0 | 0 | 0 | Enhanced |

|       |                                                                     |      |      |   |   |   |          |
|-------|---------------------------------------------------------------------|------|------|---|---|---|----------|
| 12524 | GO_SCAVENGER_RECEPTOR_ACTIVITY                                      | 1.54 | 1.69 | 0 | 0 | 0 | Enhanced |
| 12525 | REACTOME_TELOMERE_C_STRAND_LAGGING_STRAND_SYNTHESIS                 | 1.54 | 1.66 | 0 | 0 | 0 | Enhanced |
| 12526 | GO_ACID_SECRETION                                                   | 1.54 | 1.65 | 0 | 0 | 0 | Enhanced |
| 12527 | KEGG_LEISHMANIA_INFECTION                                           | 1.54 | 1.65 | 0 | 0 | 0 | Enhanced |
| 12528 | GO_CELLULAR_RESPONSE_TO_AMINO_ACID_STIMULUS                         | 1.54 | 1.61 | 0 | 0 | 0 | Enhanced |
| 12529 | WANG_BARRETTES_ESOPHAGUS_UP                                         | 1.54 | 1.61 | 0 | 0 | 0 | Enhanced |
| 12530 | RADAEVA_RESPONSE_TO_IFNA1_UP                                        | 1.54 | 1.59 | 0 | 0 | 0 | Enhanced |
| 12531 | GO_AMELOGENESIS                                                     | 1.54 | 1.57 | 0 | 0 | 0 | Enhanced |
| 12532 | GO_GROWTH_HORMONE_RECEPTOR_SIGNALING_PATHWAY_VIA_JAK_STAT           | 1.54 | 1.57 | 0 | 0 | 0 | Enhanced |
| 12533 | GO_BASIC_AMINO_ACID_TRANSMEMBRANE_TRANSPORT                         | 1.54 | 1.54 | 0 | 0 | 0 | Enhanced |
| 12534 | KEGG_COMPLEMENT_AND_COAGULATION_CASCADES                            | 1.54 | 1.52 | 0 | 0 | 0 | Enhanced |
| 12535 | GO_NEGATIVE_REGULATION_OF_LEUKOCYTE_MEDIATED_IMMUNITY               | 1.54 | 1.5  | 0 | 0 | 0 | Enhanced |
| 12536 | REACTOME_INTERACTION_BETWEEN_L1_AND_ANKYRINS                        | 1.54 | 1.5  | 0 | 0 | 0 | Enhanced |
| 12537 | GO_OXIDOREDUCTASE_ACTIVITY_ACTING_ON_PEROXIDE_AS_ACCEPTOR           | 1.54 | 1.49 | 0 | 0 | 0 | Enhanced |
| 12538 | GO_POSITIVE_REGULATION_OF_PHAGOCYTOSIS_ENGULFMENT                   | 1.54 | 1.47 | 0 | 0 | 0 | Enhanced |
| 12539 | APPEL_IMATINIB_RESPONSE                                             | 1.54 | 1.45 | 0 | 0 | 0 | Enhanced |
| 12540 | GO_POSITIVE_REGULATION_OF_EPITHELIAL_CELL_APOPTOTIC_PROCESS         | 1.54 | 1.45 | 0 | 0 | 0 | Enhanced |
| 12541 | GO_REGULATION_OF_EPITHELIAL_TUBE_FORMATION                          | 1.54 | 1.45 | 0 | 0 | 0 | Enhanced |
| 12542 | CHR7Q31                                                             | 1.54 | 1.44 | 0 | 0 | 0 | Enhanced |
| 12543 | GO_NEUROTRANSMITTER_TRANSPORTER_ACTIVITY                            | 1.54 | 1.44 | 0 | 0 | 0 | Enhanced |
| 12544 | GO_ALPHA_LINOLENIC_ACID_METABOLIC_PROCESS                           | 1.54 | 1.43 | 0 | 0 | 0 | Enhanced |
| 12545 | GO_RESPONSE_TO_GROWTH_HORMONE                                       | 1.54 | 1.43 | 0 | 0 | 0 | Enhanced |
| 12546 | GO_OXIDOREDUCTASE_ACTIVITY_ACTING_ON_SINGLE_DONORS_WITH_INCORPOR    | 1.54 | 1.42 | 0 | 0 | 0 | Enhanced |
| 12547 | NIKOLSKY_BREAST_CANCER_1Q21_AMPLICON                                | 1.54 | 1.42 | 0 | 0 | 0 | Enhanced |
| 12548 | BIOCARTA_CD40_PATHWAY                                               | 1.54 | 1.38 | 0 | 0 | 0 | Enhanced |
| 12549 | BIOCARTA_TCYTOTOXIC_PATHWAY                                         | 1.54 | 1.37 | 0 | 0 | 0 | Enhanced |
| 12550 | REACTOME_PROCESSIVE_SYNTHESIS_ON_THE_C_STRAND_OF_THE_TELOMERE       | 1.54 | 1.3  | 0 | 0 | 0 | Enhanced |
| 12551 | LEE_DIFFERENTIATING_T_LYMPHOCYTE                                    | 1.55 | 4    | 0 | 0 | 0 | Enhanced |
| 12552 | RODWELL_AGING_KIDNEY_UP                                             | 1.55 | 4    | 0 | 0 | 0 | Enhanced |
| 12553 | MARTENS_TRETINOIN_RESPONSE_UP                                       | 1.55 | 2.86 | 0 | 0 | 0 | Enhanced |
| 12554 | STK33_NOMO_UP                                                       | 1.55 | 2.86 | 0 | 0 | 0 | Enhanced |
| 12555 | CHYLA_CBFA2T3_TARGETS_UP                                            | 1.55 | 2.85 | 0 | 0 | 0 | Enhanced |
| 12556 | GO_REGULATION_OF_INFLAMMATORY_RESPONSE                              | 1.55 | 2.84 | 0 | 0 | 0 | Enhanced |
| 12557 | GO_POSITIVE_REGULATION_OF_RESPONSE_TO_EXTERNAL_STIMULUS             | 1.55 | 2.83 | 0 | 0 | 0 | Enhanced |
| 12558 | GO_TRANSFERASE_ACTIVITY_TRANSFERRING_HEXOSYL_GROUPS                 | 1.55 | 2.55 | 0 | 0 | 0 | Enhanced |
| 12559 | REACTOME_SLC_MEDIATED_TRANSMEMBRANE_TRANSPORT                       | 1.55 | 2.54 | 0 | 0 | 0 | Enhanced |
| 12560 | AKT_UP.V1_UP                                                        | 1.55 | 2.35 | 0 | 0 | 0 | Enhanced |
| 12561 | DURAND_STROMA_S_UP                                                  | 1.55 | 2.17 | 0 | 0 | 0 | Enhanced |
| 12562 | GO_CYTOKINE_SECRETION                                               | 1.55 | 2.01 | 0 | 0 | 0 | Enhanced |
| 12563 | MATZUK_LUTEAL_GENES                                                 | 1.55 | 1.94 | 0 | 0 | 0 | Enhanced |
| 12564 | GO_ANTIPORTER_ACTIVITY                                              | 1.55 | 1.86 | 0 | 0 | 0 | Enhanced |
| 12565 | GO_RESPONSE_TO_ANTI-METABOLITE                                      | 1.55 | 1.83 | 0 | 0 | 0 | Enhanced |
| 12566 | GO_AUTOPHAGIC_CELL_DEATH                                            | 1.55 | 1.74 | 0 | 0 | 0 | Enhanced |
| 12567 | GO_L_AMINO_ACID_TRANSPORT                                           | 1.55 | 1.74 | 0 | 0 | 0 | Enhanced |
| 12568 | BIOCARTA_TSP1_PATHWAY                                               | 1.55 | 1.71 | 0 | 0 | 0 | Enhanced |
| 12569 | GO_PROTEIN_KINASE_C_SIGNALING                                       | 1.55 | 1.69 | 0 | 0 | 0 | Enhanced |
| 12570 | GO_VOLUME_SENSITIVE_ANION_CHANNEL_ACTIVITY                          | 1.55 | 1.69 | 0 | 0 | 0 | Enhanced |
| 12571 | GO_AMINO_ACID_IMPORT                                                | 1.55 | 1.67 | 0 | 0 | 0 | Enhanced |
| 12572 | REACTOME_RESOLUTION_OF_D_LOOP_STRUCTURES                            | 1.55 | 1.65 | 0 | 0 | 0 | Enhanced |
| 12573 | GO_DISRUPTION_OF_CELLS_OF_OTHER_ORGANISM_INVOLVED_IN_SYMBIOTIC_INT  | 1.55 | 1.63 | 0 | 0 | 0 | Enhanced |
| 12574 | GO_REGULATION_OF_TOLL_LIKE_RECEPTOR_SIGNALING_PATHWAY               | 1.55 | 1.62 | 0 | 0 | 0 | Enhanced |
| 12575 | GO_MEMBRANE_RAFT_ORGANIZATION                                       | 1.55 | 1.58 | 0 | 0 | 0 | Enhanced |
| 12576 | BOGN_TREATMENT_RELATED_MYELOID_LEUKEMIA_DN                          | 1.55 | 1.55 | 0 | 0 | 0 | Enhanced |
| 12577 | GO_EXCITATORY_SYNAPSE                                               | 1.55 | 1.55 | 0 | 0 | 0 | Enhanced |
| 12578 | HOLLEMAN_PREDNISOLONE_RESISTANCE_B_ALL_DN                           | 1.55 | 1.55 | 0 | 0 | 0 | Enhanced |
| 12579 | PID_ATF2_PATHWAY                                                    | 1.55 | 1.55 | 0 | 0 | 0 | Enhanced |
| 12580 | KIM_LRRC3B_TARGETS                                                  | 1.55 | 1.54 | 0 | 0 | 0 | Enhanced |
| 12581 | GO_MONOOXYGENASE_ACTIVITY                                           | 1.55 | 1.52 | 0 | 0 | 0 | Enhanced |
| 12582 | SANA_RESPONSE_TO_IFNG_UP                                            | 1.55 | 1.52 | 0 | 0 | 0 | Enhanced |
| 12583 | SCHURINGA_STAT5A_TARGETS_DN                                         | 1.55 | 1.51 | 0 | 0 | 0 | Enhanced |
| 12584 | BIOCARTA_S1P_PATHWAY                                                | 1.55 | 1.48 | 0 | 0 | 0 | Enhanced |
| 12585 | GO_POSITIVE_REGULATION_OF_CHOLESTEROL_EFFLUX                        | 1.55 | 1.48 | 0 | 0 | 0 | Enhanced |
| 12586 | TERAMOTO_OPN_TARGETS_CLUSTER_7                                      | 1.55 | 1.48 | 0 | 0 | 0 | Enhanced |
| 12587 | GO_STEROL_TRANSPORTER_ACTIVITY                                      | 1.55 | 1.46 | 0 | 0 | 0 | Enhanced |
| 12588 | PID_IL12_STAT4_PATHWAY                                              | 1.55 | 1.46 | 0 | 0 | 0 | Enhanced |
| 12589 | GO_LEUKOCYTE_TETHERING_OR_ROLLING                                   | 1.55 | 1.43 | 0 | 0 | 0 | Enhanced |
| 12590 | GO_MEMBRANE_PROTEIN_INTRACELLULAR_DOMAIN_PROTEOLYSIS                | 1.55 | 1.42 | 0 | 0 | 0 | Enhanced |
| 12591 | GO_FAT_CELL_DIFFERENTIATION                                         | 1.56 | 2.53 | 0 | 0 | 0 | Enhanced |
| 12592 | GO_ORGANIC_ACID_BIOSYNTHETIC_PROCESS                                | 1.56 | 2.39 | 0 | 0 | 0 | Enhanced |
| 12593 | LIU_CMYB_TARGETS_UP                                                 | 1.56 | 2.37 | 0 | 0 | 0 | Enhanced |
| 12594 | KONDO_EZH2_TARGETS                                                  | 1.56 | 2.25 | 0 | 0 | 0 | Enhanced |
| 12595 | IL21_UP.V1_DN                                                       | 1.56 | 2.09 | 0 | 0 | 0 | Enhanced |
| 12596 | TAKEDA_TARGETS_OF_NUP98_HOXA9_FUSION_8D_UP                          | 1.56 | 2    | 0 | 0 | 0 | Enhanced |
| 12597 | BHAT_ESR1_TARGETS_VIA_AKT1_DN                                       | 1.56 | 1.95 | 0 | 0 | 0 | Enhanced |
| 12598 | GALINDO_IMMUNE_RESPONSE_TO_ENTEROTOXIN                              | 1.56 | 1.95 | 0 | 0 | 0 | Enhanced |
| 12599 | GO_HEPARAN_SULFATE_PROTEOGLYCAN_BINDING                             | 1.56 | 1.94 | 0 | 0 | 0 | Enhanced |
| 12600 | PARK_OSTEOBLAST_DIFFERENTIATION_BY_PHENYLAMINYL_UP                  | 1.56 | 1.94 | 0 | 0 | 0 | Enhanced |
| 12601 | GO_POSITIVE_REGULATION_OF_LEUKOCYTE_PROLIFERATION                   | 1.56 | 1.87 | 0 | 0 | 0 | Enhanced |
| 12602 | GO_CELLULAR_AMINO_ACID_BIOSYNTHETIC_PROCESS                         | 1.56 | 1.83 | 0 | 0 | 0 | Enhanced |
| 12603 | YAO_TEMPORAL_RESPONSE_TO_PROGESTERONE_CLUSTER_1                     | 1.56 | 1.82 | 0 | 0 | 0 | Enhanced |
| 12604 | BIOCARTA_IL22BP_PATHWAY                                             | 1.56 | 1.79 | 0 | 0 | 0 | Enhanced |
| 12605 | MCCABE_HOXC6_TARGETS_CANCER_UP                                      | 1.56 | 1.79 | 0 | 0 | 0 | Enhanced |
| 12606 | YAO_TEMPORAL_RESPONSE_TO_PROGESTERONE_CLUSTER_16                    | 1.56 | 1.77 | 0 | 0 | 0 | Enhanced |
| 12607 | BIOCARTA_ETS_PATHWAY                                                | 1.56 | 1.76 | 0 | 0 | 0 | Enhanced |
| 12608 | GO_LIPOPROTEIN_PARTICLE_RECEPTOR_ACTIVITY                           | 1.56 | 1.76 | 0 | 0 | 0 | Enhanced |
| 12609 | GO_LIPOPEPTIDE_BINDING                                              | 1.56 | 1.75 | 0 | 0 | 0 | Enhanced |
| 12610 | HOLLEMAN_ASPARAGINASE_RESISTANCE_B_ALL_DN                           | 1.56 | 1.74 | 0 | 0 | 0 | Enhanced |
| 12611 | GO_NEGATIVE_REGULATION_OF_INNATE_IMMUNE_RESPONSE                    | 1.56 | 1.72 | 0 | 0 | 0 | Enhanced |
| 12612 | GO_NEGATIVE_REGULATION_OF_NEUROINFLAMMATORY_RESPONSE                | 1.56 | 1.71 | 0 | 0 | 0 | Enhanced |
| 12613 | GO_CELLULAR_RESPONSE_TO_LOW_DENSITY_LIPOPROTEIN_PARTICLE_STIMULUS   | 1.56 | 1.63 | 0 | 0 | 0 | Enhanced |
| 12614 | SMID_BREAST_CANCER_RELAPSE_IN_PLEURA_DN                             | 1.56 | 1.63 | 0 | 0 | 0 | Enhanced |
| 12615 | GO_INTRAMOLECULAR_OXIDOREDUCTASE_ACTIVITY_TRANSPOSING_C_C_BONDS     | 1.56 | 1.57 | 0 | 0 | 0 | Enhanced |
| 12616 | GO_RESPONSE_TO_UV_C                                                 | 1.56 | 1.57 | 0 | 0 | 0 | Enhanced |
| 12617 | XU_RESPONSE_TO_TRETINOIN_AND_NSC682994_UP                           | 1.56 | 1.57 | 0 | 0 | 0 | Enhanced |
| 12618 | GO_BICARBONATE_TRANSPORT                                            | 1.56 | 1.56 | 0 | 0 | 0 | Enhanced |
| 12619 | GO_COLLATERAL_SPROUTING                                             | 1.56 | 1.56 | 0 | 0 | 0 | Enhanced |
| 12620 | GO_POSITIVE_REGULATION_OF_CYSSTEINE_TYPE_ENDOPEPTIDASE_ACTIVITY_INV | 1.56 | 1.54 | 0 | 0 | 0 | Enhanced |
| 12621 | CROONQUIST_STROMAL_STIMULATION_UP                                   | 1.56 | 1.5  | 0 | 0 | 0 | Enhanced |
| 12622 | GO_PHOSPHATIDYLCHOLINE_ACYL_CHAIN_REMODELING                        | 1.56 | 1.49 | 0 | 0 | 0 | Enhanced |
| 12623 | LEIN_OLIGODENDROCYTE_MARKERS                                        | 1.56 | 1.49 | 0 | 0 | 0 | Enhanced |
| 12624 | SIG_CD40PATHWAYMAP                                                  | 1.56 | 1.48 | 0 | 0 | 0 | Enhanced |
| 12625 | VALK_AML_WITH_EV1                                                   | 1.56 | 1.42 | 0 | 0 | 0 | Enhanced |
| 12626 | PID_SYNDECAN_3_PATHWAY                                              | 1.56 | 1.39 | 0 | 0 | 0 | Enhanced |
| 12627 | GO_C21_STEROID_HORMONE_METABOLIC_PROCESS                            | 1.56 | 1.36 | 0 | 0 | 0 | Enhanced |
| 12628 | GO_PROTEIN_LIPID_COMPLEX_BINDING                                    | 1.56 | 1.33 | 0 | 0 | 0 | Enhanced |
| 12629 | CHEN_METABOLIC_SYNDROM_NETWORK                                      | 1.57 | 4    | 0 | 0 | 0 | Enhanced |
| 12630 | GO_RESPONSE_TO_BIOTIC_STIMULUS                                      | 1.57 | 4    | 0 | 0 | 0 | Enhanced |
| 12631 | GO_REGULATION_OF_LEUKOCYTE_MEDIATED_IMMUNITY                        | 1.57 | 2.84 | 0 | 0 | 0 | Enhanced |
| 12632 | GO_REGULATION_OF_NUCLEOTIDE_BINDING_OLIGOMERIZATION_DOMAIN_CONTAIN  | 1.57 | 2.69 | 0 | 0 | 0 | Enhanced |



|       |                                                                    |      |      |   |   |   |          |
|-------|--------------------------------------------------------------------|------|------|---|---|---|----------|
| 12633 | HUMMERICH_SKIN_CANCER_PROGRESSION_UP                               | 1.57 | 2.34 | 0 | 0 | 0 | Enhanced |
| 12634 | JAEGER_METASTASIS_DN                                               | 1.57 | 2.34 | 0 | 0 | 0 | Enhanced |
| 12635 | ACOSTA_PROLIFERATION_INDEPENDENT_MYC_TARGETS_DN                    | 1.57 | 2.13 | 0 | 0 | 0 | Enhanced |
| 12636 | IGLESIAS_E2F_TARGETS_UP                                            | 1.57 | 2.13 | 0 | 0 | 0 | Enhanced |
| 12637 | GO_NEGATIVE_REGULATION_OF_PEPTIDE_SECRETION                        | 1.57 | 2.11 | 0 | 0 | 0 | Enhanced |
| 12638 | GO_GAP_JUNCTION                                                    | 1.57 | 2.02 | 0 | 0 | 0 | Enhanced |
| 12639 | GO_NEGATIVE_REGULATION_OF_T_HELPER_1_TYPE_IMMUNE_RESPONSE          | 1.57 | 1.88 | 0 | 0 | 0 | Enhanced |
| 12640 | GAVIN_FOXP3_TARGETS_CLUSTER_P7                                     | 1.57 | 1.86 | 0 | 0 | 0 | Enhanced |
| 12641 | REACTOME_RHO_GTPASES_ACTIVATE_RHOTEKIN_AND_RHOPHILINS              | 1.57 | 1.86 | 0 | 0 | 0 | Enhanced |
| 12642 | GO_NEGATIVE_REGULATION_OF_CHEMOTAXIS                               | 1.57 | 1.82 | 0 | 0 | 0 | Enhanced |
| 12643 | GO_STEROID_BINDING                                                 | 1.57 | 1.8  | 0 | 0 | 0 | Enhanced |
| 12644 | GO_ALCOHOL_BINDING                                                 | 1.57 | 1.79 | 0 | 0 | 0 | Enhanced |
| 12645 | REACTOME_LINOLEIC_ACID_LA_METABOLISM                               | 1.57 | 1.79 | 0 | 0 | 0 | Enhanced |
| 12646 | BIOCARTA_P27_PATHWAY                                               | 1.57 | 1.78 | 0 | 0 | 0 | Enhanced |
| 12647 | GO_CHEMOKINE_BIOSYNTHETIC_PROCESS                                  | 1.57 | 1.75 | 0 | 0 | 0 | Enhanced |
| 12648 | GO_HORMONE_BIOSYNTHETIC_PROCESS                                    | 1.57 | 1.75 | 0 | 0 | 0 | Enhanced |
| 12649 | GO_NEUROTRANSMITTER_GATED_ION_CHANNEL_CLUSTERING                   | 1.57 | 1.73 | 0 | 0 | 0 | Enhanced |
| 12650 | DAVICIONI_RHABDOMYOSARCOMA_PAX_FOXO1_FUSION_UP                     | 1.57 | 1.68 | 0 | 0 | 0 | Enhanced |
| 12651 | GO_REGULATION_OF_CELL_MIGRATION_INVOLVED_IN_SPROUTING_ANGIOGENESIS | 1.57 | 1.68 | 0 | 0 | 0 | Enhanced |
| 12652 | REACTOME_LAGGING_STRAND_SYNTHESIS                                  | 1.57 | 1.67 | 0 | 0 | 0 | Enhanced |
| 12653 | WEIGEL_OXIDATIVE_STRESS_RESPONSE                                   | 1.57 | 1.67 | 0 | 0 | 0 | Enhanced |
| 12654 | WINZEN_DEGRADED_VIA_KHSRP                                          | 1.57 | 1.66 | 0 | 0 | 0 | Enhanced |
| 12655 | KIM_GERMINAL_CENTER_T_HELPER_DN                                    | 1.57 | 1.65 | 0 | 0 | 0 | Enhanced |
| 12656 | BOYLAN_MULTIPLE_MYELOMA_C_CLUSTER_DN                               | 1.57 | 1.63 | 0 | 0 | 0 | Enhanced |
| 12657 | GO_CD8_POSITIVE_ALPHA_BETA_T_CELL_ACTIVATION                       | 1.57 | 1.62 | 0 | 0 | 0 | Enhanced |
| 12658 | PENG_GLUCOSE_DEPRIVATION_UP                                        | 1.57 | 1.62 | 0 | 0 | 0 | Enhanced |
| 12659 | GO_GLYCOPROTEIN_CATABOLIC_PROCESS                                  | 1.57 | 1.6  | 0 | 0 | 0 | Enhanced |
| 12660 | GU_PDEF_TARGETS_UP                                                 | 1.57 | 1.58 | 0 | 0 | 0 | Enhanced |
| 12661 | GO_STEROID_HORMONE_RECEPTOR_ACTIVITY                               | 1.57 | 1.57 | 0 | 0 | 0 | Enhanced |
| 12662 | GO_NEGATIVE_REGULATION_OF_CYTOKINE_PRODUCTION_INVOLVED_IN_INFLAMM  | 1.57 | 1.54 | 0 | 0 | 0 | Enhanced |
| 12663 | ZHANG_ANTIVIRAL_RESPONSE_TO_RIBAVIRIN_UP                           | 1.57 | 1.53 | 0 | 0 | 0 | Enhanced |
| 12664 | BIOCARTA_THELPER_PATHWAY                                           | 1.57 | 1.52 | 0 | 0 | 0 | Enhanced |
| 12665 | RAMJANI_APOPTOSIS_BY_TGFB1_VIA_MAPK1_DN                            | 1.57 | 1.52 | 0 | 0 | 0 | Enhanced |
| 12666 | GO_BASIC_AMINO_ACID_TRANSMEMBRANE_TRANSPORTER_ACTIVITY             | 1.57 | 1.45 | 0 | 0 | 0 | Enhanced |
| 12667 | GO_INTERLEUKIN_1_SECRETION                                         | 1.57 | 1.45 | 0 | 0 | 0 | Enhanced |
| 12668 | ABE_VEGFA_TARGETS_2HR                                              | 1.57 | 1.44 | 0 | 0 | 0 | Enhanced |
| 12669 | GO_ANTIGEN_PROCESSING_AND_PRESENTATION_OF_EXOGENOUS_PEPTIDE_ANTI   | 1.57 | 1.4  | 0 | 0 | 0 | Enhanced |
| 12670 | GO_ANION_TRANSPORT                                                 | 1.58 | 4    | 0 | 0 | 0 | Enhanced |
| 12671 | GO_ENDOPLASMIC_RETICULUM                                           | 1.58 | 4    | 0 | 0 | 0 | Enhanced |
| 12672 | GO_ENDOPLASMIC_RETICULUM_PART                                      | 1.58 | 4    | 0 | 0 | 0 | Enhanced |
| 12673 | GO_TAXIS                                                           | 1.58 | 2.88 | 0 | 0 | 0 | Enhanced |
| 12674 | ZHANG_TLX_TARGETS_36HR_UP                                          | 1.58 | 2.85 | 0 | 0 | 0 | Enhanced |
| 12675 | GO_REGULATION_OF_LEUKOCYTE_PROLIFERATION                           | 1.58 | 2.83 | 0 | 0 | 0 | Enhanced |
| 12676 | HALLMARK_INTERFERON_ALPHA_RESPONSE                                 | 1.58 | 2.35 | 0 | 0 | 0 | Enhanced |
| 12677 | DIAZ_CHRONIC_MEYLOGENOUS_LEUKEMIA_DN                               | 1.58 | 2.21 | 0 | 0 | 0 | Enhanced |
| 12678 | YAUCH_HEDGEHOG_SIGNALING_PARACRINE_UP                              | 1.58 | 2.21 | 0 | 0 | 0 | Enhanced |
| 12679 | GO_REGULATION_OF_ANION_CHANNEL_ACTIVITY                            | 1.58 | 2.09 | 0 | 0 | 0 | Enhanced |
| 12680 | GO_CELL_KILLING                                                    | 1.58 | 2.04 | 0 | 0 | 0 | Enhanced |
| 12681 | BORCZUK_MALIGNANT_MESOTHELIOMA_DN                                  | 1.58 | 1.97 | 0 | 0 | 0 | Enhanced |
| 12682 | GO_MHC_CLASS_I_PROTEIN_COMPLEX                                     | 1.58 | 1.96 | 0 | 0 | 0 | Enhanced |
| 12683 | GO_NEGATIVE_REGULATION_OF_MACROPHAGE_ACTIVATION                    | 1.58 | 1.95 | 0 | 0 | 0 | Enhanced |
| 12684 | TAKEDA_TARGETS_OF_NUP98_HOXA9_FUSION_T6D_DN                        | 1.58 | 1.9  | 0 | 0 | 0 | Enhanced |
| 12685 | GO_NITRIC_OXIDE_BIOSYNTHETIC_PROCESS                               | 1.58 | 1.88 | 0 | 0 | 0 | Enhanced |
| 12686 | KUNNINGER_IGF1_VS_PDGF_TARGETS_UP                                  | 1.58 | 1.88 | 0 | 0 | 0 | Enhanced |
| 12687 | GO_BASIC_AMINO_ACID_TRANSPORT                                      | 1.58 | 1.87 | 0 | 0 | 0 | Enhanced |
| 12688 | GO_OXIDOREDUCTASE_ACTIVITY_ACTING_ON_PAIRRED_DONORS_WITH_OXIDATION | 1.58 | 1.85 | 0 | 0 | 0 | Enhanced |
| 12689 | REACTOME_ACYL_CHAIN_REMODELLING_OF_PC                              | 1.58 | 1.84 | 0 | 0 | 0 | Enhanced |
| 12690 | GO_INTERLEUKIN_1_BETA_SECRETION                                    | 1.58 | 1.81 | 0 | 0 | 0 | Enhanced |
| 12691 | GO_REACTIVE_OXYGEN_SPECIES_BIOSYNTHETIC_PROCESS                    | 1.58 | 1.81 | 0 | 0 | 0 | Enhanced |
| 12692 | GO_RESPONSE_TO_STEROL                                              | 1.58 | 1.8  | 0 | 0 | 0 | Enhanced |
| 12693 | GO_NEUROTRANSMITTER_BIOSYNTHETIC_PROCESS                           | 1.58 | 1.77 | 0 | 0 | 0 | Enhanced |
| 12694 | GO_REGULATION_OF_KETONE_BIOSYNTHETIC_PROCESS                       | 1.58 | 1.77 | 0 | 0 | 0 | Enhanced |
| 12695 | GO_RESPONSE_TO_INTERLEUKIN_9                                       | 1.58 | 1.76 | 0 | 0 | 0 | Enhanced |
| 12696 | GO_AZUROPHIL_GNANULE_MEMBRANE                                      | 1.58 | 1.75 | 0 | 0 | 0 | Enhanced |
| 12697 | GO_ANTIGEN_PROCESSING_AND_PRESENTATION_OF_ENDOGENOUS_PEPTIDE_AN    | 1.58 | 1.7  | 0 | 0 | 0 | Enhanced |
| 12698 | BIOCARTA_TPO_PATHWAY                                               | 1.58 | 1.69 | 0 | 0 | 0 | Enhanced |
| 12699 | GARGALOVIC_RESPONSE_TO_OXIDIZED_PHOSPHOLIPIDS_LIGHTYELLOW_DN       | 1.58 | 1.68 | 0 | 0 | 0 | Enhanced |
| 12700 | GO_POSITIVE_REGULATION_OF_HORMONE_BIOSYNTHETIC_PROCESS             | 1.58 | 1.67 | 0 | 0 | 0 | Enhanced |
| 12701 | GO_SODIUM_CHANNEL_ACTIVITY                                         | 1.58 | 1.66 | 0 | 0 | 0 | Enhanced |
| 12702 | GO_TRIGLYCERIDE_RICH_PLASMA_LIPOPROTEIN_PARTICLE                   | 1.58 | 1.65 | 0 | 0 | 0 | Enhanced |
| 12703 | GO_POSITIVE_REGULATION_OF_TRANSFORMING_GROWTH_FACTOR_BETA_PROD     | 1.58 | 1.62 | 0 | 0 | 0 | Enhanced |
| 12704 | BIOCARTA_RANKL_PATHWAY                                             | 1.58 | 1.6  | 0 | 0 | 0 | Enhanced |
| 12705 | DOANE_BREAST_CANCER_ESR1_DN                                        | 1.58 | 1.59 | 0 | 0 | 0 | Enhanced |
| 12706 | MARSON_FOXP3_CORE_DIRECT_TARGETS                                   | 1.58 | 1.57 | 0 | 0 | 0 | Enhanced |
| 12707 | CLASPER_LYMPHATIC_VESSELS_DURING_METASTASIS_UP                     | 1.58 | 1.55 | 0 | 0 | 0 | Enhanced |
| 12708 | REACTOME_CREB3_FACTORS_ACTIVATE_GENES                              | 1.58 | 1.54 | 0 | 0 | 0 | Enhanced |
| 12709 | GO_RESPONSE_TO_MURAMYL_DIPEPTIDE                                   | 1.58 | 1.52 | 0 | 0 | 0 | Enhanced |
| 12710 | TURJANSKI_MAPK14_TARGETS                                           | 1.58 | 1.48 | 0 | 0 | 0 | Enhanced |
| 12711 | ZHAN_V1_LATE_DIFFERENTIATION_GENES_UP                              | 1.58 | 1.48 | 0 | 0 | 0 | Enhanced |
| 12712 | GO_INTERLEUKIN_2_BIOSYNTHETIC_PROCESS                              | 1.58 | 1.47 | 0 | 0 | 0 | Enhanced |
| 12713 | STOSSI_RESPONSE_TO ESTRADIOL                                       | 1.58 | 1.47 | 0 | 0 | 0 | Enhanced |
| 12714 | GO_NEGATIVE_REGULATION_OF_FIBROBLAST_GROWTH_FACTOR_RECEPTOR_SIK    | 1.58 | 1.46 | 0 | 0 | 0 | Enhanced |
| 12715 | GO_HISTONE_H3_K27_METHYLATION                                      | 1.58 | 1.44 | 0 | 0 | 0 | Enhanced |
| 12716 | RODRIGUES_NTN1_AND_DCC_TARGETS                                     | 1.58 | 1.42 | 0 | 0 | 0 | Enhanced |
| 12717 | TOMLINS_METASTASIS_DN                                              | 1.58 | 1.4  | 0 | 0 | 0 | Enhanced |
| 12718 | DCA_UP_V1_DN                                                       | 1.59 | 4    | 0 | 0 | 0 | Enhanced |
| 12719 | WONG_ADULT_TISSUE_STEM_MODULE                                      | 1.59 | 4    | 0 | 0 | 0 | Enhanced |
| 12720 | GO_REGULATION_OF_T_HELPER_2_CELL_CYTOKINE_PRODUCTION               | 1.59 | 2.69 | 0 | 0 | 0 | Enhanced |
| 12721 | AKT_UP_MTOR_DN_V1_DN                                               | 1.59 | 2.55 | 0 | 0 | 0 | Enhanced |
| 12722 | LIU_SOX4_TARGETS_UP                                                | 1.59 | 2.55 | 0 | 0 | 0 | Enhanced |
| 12723 | GROSS_HYPOXIA_VIA_ELK3_DN                                          | 1.59 | 2.52 | 0 | 0 | 0 | Enhanced |
| 12724 | GO_SKELETAL_MUSCLE_ORGAN_DEVELOPMENT                               | 1.59 | 2.51 | 0 | 0 | 0 | Enhanced |
| 12725 | GO_ORGANIC_ACID_TRANSMEMBRANE_TRANSPORT                            | 1.59 | 2.33 | 0 | 0 | 0 | Enhanced |
| 12726 | MORI_IMMATURE_B_LYMPHOCYTE_UP                                      | 1.59 | 2.3  | 0 | 0 | 0 | Enhanced |
| 12727 | KANG_AR_TARGETS_DN                                                 | 1.59 | 2.14 | 0 | 0 | 0 | Enhanced |
| 12728 | BIOCARTA_AMAN_PATHWAY                                              | 1.59 | 2.12 | 0 | 0 | 0 | Enhanced |
| 12729 | GO_REGULATION_OF_TYPE_B_PANCREATIC_CELL_PROLIFERATION              | 1.59 | 2.12 | 0 | 0 | 0 | Enhanced |
| 12730 | GO_DRUG_TRANSMEMBRANE_TRANSPORTER_ACTIVITY                         | 1.59 | 1.95 | 0 | 0 | 0 | Enhanced |
| 12731 | REACTOME_BUTYROPHILIN_BTN_FAMILY_INTERACTIONS                      | 1.59 | 1.95 | 0 | 0 | 0 | Enhanced |
| 12732 | GO_L_SERINE_BIOSYNTHETIC_PROCESS                                   | 1.59 | 1.93 | 0 | 0 | 0 | Enhanced |
| 12733 | GO_MAINTENANCE_OF_PROTEIN_LOCATION_IN_NUCLEUS                      | 1.59 | 1.88 | 0 | 0 | 0 | Enhanced |
| 12734 | NAGASHIMA_EGF_SIGNALING_UP                                         | 1.59 | 1.85 | 0 | 0 | 0 | Enhanced |
| 12735 | GO_PYRIMIDINE_NUCLEOTIDE_METABOLIC_PROCESS                         | 1.59 | 1.79 | 0 | 0 | 0 | Enhanced |
| 12736 | CAHOY_NEURONAL                                                     | 1.59 | 1.75 | 0 | 0 | 0 | Enhanced |
| 12737 | GO_DICARBOXYLIC_ACID_METABOLIC_PROCESS                             | 1.59 | 1.74 | 0 | 0 | 0 | Enhanced |
| 12738 | CAIRO_PML_TARGETS_BOUND_BY_MYC_DN                                  | 1.59 | 1.72 | 0 | 0 | 0 | Enhanced |
| 12739 | WANG_LSD1_TARGETS_DN                                               | 1.59 | 1.71 | 0 | 0 | 0 | Enhanced |
| 12740 | REACTOME_SERINE_BIOSYNTHESIS                                       | 1.59 | 1.7  | 0 | 0 | 0 | Enhanced |
| 12741 | GO_PHOSPHATIDYLCHOLINE_METABOLIC_PROCESS                           | 1.59 | 1.64 | 0 | 0 | 0 | Enhanced |

|       |                                                                   |      |      |   |   |   |          |
|-------|-------------------------------------------------------------------|------|------|---|---|---|----------|
| 12742 | GO_POSITIVE_REGULATION_OF_HORMONE_METABOLIC_PROCESS               | 1.59 | 1.61 | 0 | 0 | 0 | Enhanced |
| 12743 | GO_POSITIVE_REGULATION_OF_INTERLEUKIN_1_PRODUCTION                | 1.59 | 1.57 | 0 | 0 | 0 | Enhanced |
| 12744 | GO_GOLGI_CIS_CISTERNA                                             | 1.59 | 1.55 | 0 | 0 | 0 | Enhanced |
| 12745 | IZUKA_LIVER_CANCER_PROGRESSION_L1_G1_UP                           | 1.59 | 1.54 | 0 | 0 | 0 | Enhanced |
| 12746 | OHGUCHI_LIVER_HNF4A_TARGETS_UP                                    | 1.59 | 1.41 | 0 | 0 | 0 | Enhanced |
| 12747 | GO_TOLL_LIKE_RECEPTOR_2_SIGNALING_PATHWAY                         | 1.59 | 1.39 | 0 | 0 | 0 | Enhanced |
| 12748 | WEST_ADRENOCORITICAL_TUMOR_DN                                     | 1.60 | 4    | 0 | 0 | 0 | Enhanced |
| 12749 | GO_EXTRACELLULAR_STRUCTURE_ORGANIZATION                           | 1.60 | 2.84 | 0 | 0 | 0 | Enhanced |
| 12750 | CASORELLI_ACUTE_PROMYELOCYTIC_LEUKEMIA_UP                         | 1.60 | 2.83 | 0 | 0 | 0 | Enhanced |
| 12751 | COULOUARN_TEMPORAL_TGFB1_SIGNATURE_UP                             | 1.60 | 2.51 | 0 | 0 | 0 | Enhanced |
| 12752 | YAMAZAKI_TCEB3_TARGETS_UP                                         | 1.60 | 2.35 | 0 | 0 | 0 | Enhanced |
| 12753 | REACTOME_METABOLISM_OF_STEROIDS                                   | 1.60 | 2.24 | 0 | 0 | 0 | Enhanced |
| 12754 | GO_POSITIVE_REGULATION_OF_T_CELL_PROLIFERATION                    | 1.60 | 2.11 | 0 | 0 | 0 | Enhanced |
| 12755 | GO_LIPASE_ACTIVITY                                                | 1.60 | 2.1  | 0 | 0 | 0 | Enhanced |
| 12756 | CHEN_HOXA5_TARGETS_6HR_UP                                         | 1.60 | 1.95 | 0 | 0 | 0 | Enhanced |
| 12757 | GO_REGULATION_OF_TOLL_LIKE_RECEPTOR_2_SIGNALING_PATHWAY           | 1.60 | 1.93 | 0 | 0 | 0 | Enhanced |
| 12758 | GO_STEROL_BINDING                                                 | 1.60 | 1.93 | 0 | 0 | 0 | Enhanced |
| 12759 | GO_STEROL_HOMEOSTASIS                                             | 1.60 | 1.9  | 0 | 0 | 0 | Enhanced |
| 12760 | LEE_NEURAL_CREST_STEM_CELL_DN                                     | 1.60 | 1.9  | 0 | 0 | 0 | Enhanced |
| 12761 | GO_HOMOPHILIC_CELL_ADHESION_VIA_PLASMA_MEMBRANE_ADHESION_MOLECUL  | 1.60 | 1.89 | 0 | 0 | 0 | Enhanced |
| 12762 | GO_NEGATIVE_REGULATION_OF_INTERLEUKIN_1_PRODUCTION                | 1.60 | 1.89 | 0 | 0 | 0 | Enhanced |
| 12763 | GO_T_CELL_MEDIATED_CYTOTOXICITY                                   | 1.60 | 1.88 | 0 | 0 | 0 | Enhanced |
| 12764 | REACTOME_INTERLEUKIN_7_SIGNALING                                  | 1.60 | 1.88 | 0 | 0 | 0 | Enhanced |
| 12765 | YAO_TEMPORAL_RESPONSE_TO_PROGESTERONE_CLUSTER_2                   | 1.60 | 1.87 | 0 | 0 | 0 | Enhanced |
| 12766 | INGA_TP53_TARGETS                                                 | 1.60 | 1.85 | 0 | 0 | 0 | Enhanced |
| 12767 | GO_INTERLEUKIN_10_SECRETION                                       | 1.60 | 1.82 | 0 | 0 | 0 | Enhanced |
| 12768 | GO_CARGO_RECEPTOR_ACTIVITY                                        | 1.60 | 1.81 | 0 | 0 | 0 | Enhanced |
| 12769 | BROWNE_HCMV_INFECTION_1HR_UP                                      | 1.60 | 1.8  | 0 | 0 | 0 | Enhanced |
| 12770 | COWLING_MYCN_TARGETS                                              | 1.60 | 1.8  | 0 | 0 | 0 | Enhanced |
| 12771 | GO_PHOSPHATIDYLETHANOLAMINE_ACYL_CHAIN_REMODELING                 | 1.60 | 1.8  | 0 | 0 | 0 | Enhanced |
| 12772 | ZHAN_MULTIPLE_MYELOMA_HP_UP                                       | 1.60 | 1.8  | 0 | 0 | 0 | Enhanced |
| 12773 | GO_OLIGOSACCHARYLTRANSFERASE_COMPLEX                              | 1.60 | 1.79 | 0 | 0 | 0 | Enhanced |
| 12774 | GO_NEGATIVE_REGULATION_OF_NIK_NF_KAPPA_B_SIGNALING                | 1.60 | 1.75 | 0 | 0 | 0 | Enhanced |
| 12775 | BARRIER_CANCER_RELAPSE_NORMAL_SAMPLE_DN                           | 1.60 | 1.74 | 0 | 0 | 0 | Enhanced |
| 12776 | GO_REGULATION_OF_TUMOR_NECROSIS_FACTOR_MEDIATED_SIGNALING_PATHW   | 1.60 | 1.74 | 0 | 0 | 0 | Enhanced |
| 12777 | BIOCARTA_TH1TH2_PATHWAY                                           | 1.60 | 1.73 | 0 | 0 | 0 | Enhanced |
| 12778 | REACTOME_PCNA_DEPENDENT_LONG_PATCH_BASE_EXCISION_REPAIR           | 1.60 | 1.72 | 0 | 0 | 0 | Enhanced |
| 12779 | PID_CD40_PATHWAY                                                  | 1.60 | 1.69 | 0 | 0 | 0 | Enhanced |
| 12780 | REACTOME_ENDOSOMAL_VACUOLAR_PATHWAY                               | 1.60 | 1.69 | 0 | 0 | 0 | Enhanced |
| 12781 | GO_PROTEIN_DEGLYCOSYLATION                                        | 1.60 | 1.66 | 0 | 0 | 0 | Enhanced |
| 12782 | GO_GLUCOCORTICOID_RECEPTOR_BINDING                                | 1.60 | 1.65 | 0 | 0 | 0 | Enhanced |
| 12783 | SCHLINGEMANN_SKIN_CARCINOGENESIS_TPA_DN                           | 1.60 | 1.64 | 0 | 0 | 0 | Enhanced |
| 12784 | GO_T_HELPER_2_CELL_DIFFERENTIATION                                | 1.60 | 1.61 | 0 | 0 | 0 | Enhanced |
| 12785 | GO_REGULATION_OF_TOLL_LIKE_RECEPTOR_4_SIGNALING_PATHWAY           | 1.60 | 1.57 | 0 | 0 | 0 | Enhanced |
| 12786 | CHICAS_RB1_TARGETS_CONFLUENT                                      | 1.61 | 4    | 0 | 0 | 0 | Enhanced |
| 12787 | GO_LYMPHOCYTE_ACTIVATION                                          | 1.61 | 4    | 0 | 0 | 0 | Enhanced |
| 12788 | GRAESSMANN_RESPONSE_TO_MC_AND_DOXORUBICIN_UP                      | 1.61 | 4    | 0 | 0 | 0 | Enhanced |
| 12789 | MONNIER_POSTRADIATION_TUMOR_ESCAPE_DN                             | 1.61 | 4    | 0 | 0 | 0 | Enhanced |
| 12790 | SANSOM_APC_TARGETS_DN                                             | 1.61 | 2.58 | 0 | 0 | 0 | Enhanced |
| 12791 | CAIRO_HEPATOBLASTOMA_DN                                           | 1.61 | 2.55 | 0 | 0 | 0 | Enhanced |
| 12792 | GO_POSITIVE_REGULATION_OF_CYTOKINE_SECRETION                      | 1.61 | 2.5  | 0 | 0 | 0 | Enhanced |
| 12793 | GO_POSITIVE_REGULATION_OF_T_HELPER_2_CELL_CYTOKINE_PRODUCTION     | 1.61 | 2.41 | 0 | 0 | 0 | Enhanced |
| 12794 | MARTORIATI_MDM4_TARGETS_NEUROEPITHELIUM_DN                        | 1.61 | 2.34 | 0 | 0 | 0 | Enhanced |
| 12795 | GO_SLEEP                                                          | 1.61 | 2.25 | 0 | 0 | 0 | Enhanced |
| 12796 | VILIMAS_NOTCH1_TARGETS_DN                                         | 1.61 | 2.23 | 0 | 0 | 0 | Enhanced |
| 12797 | GO_REGULATION_OF_EPITHELIAL_CELL_APOPTOTIC_PROCESS                | 1.61 | 2.08 | 0 | 0 | 0 | Enhanced |
| 12798 | GO_POSITIVE_REGULATION_OF_INTERFERON_GAMMA_SECRETION              | 1.61 | 2.01 | 0 | 0 | 0 | Enhanced |
| 12799 | RORIE_TARGETS_OF_EWSR1_FL11_FUSION_DN                             | 1.61 | 2.01 | 0 | 0 | 0 | Enhanced |
| 12800 | GO_REGULATION_OF_REACTIVE_OXYGEN_SPECIES_BIOSYNTHETIC_PROCESS     | 1.61 | 1.95 | 0 | 0 | 0 | Enhanced |
| 12801 | GRAHAM_CML_QUIESCENT_VS_NORMAL_DIVIDING_UP                        | 1.61 | 1.93 | 0 | 0 | 0 | Enhanced |
| 12802 | CUI_TCF21_TARGETS_DN                                              | 1.61 | 1.9  | 0 | 0 | 0 | Enhanced |
| 12803 | GO_CARDIAC_RIGHT_VENTRICLE_MORPHOGENESIS                          | 1.61 | 1.88 | 0 | 0 | 0 | Enhanced |
| 12804 | GO_RESPONSE_TO_COLD                                               | 1.61 | 1.88 | 0 | 0 | 0 | Enhanced |
| 12805 | GO_RESPONSE_TO_FOLLICLE_STIMULATING_HORMONE                       | 1.61 | 1.88 | 0 | 0 | 0 | Enhanced |
| 12806 | GO_POSITIVE_REGULATION_OF_INTERLEUKIN_2_BIOSYNTHETIC_PROCESS      | 1.61 | 1.87 | 0 | 0 | 0 | Enhanced |
| 12807 | REACTOME_RESOLUTION_OF_AP_SITES_VIA_THE_MULTIPLE_NUCLEOTIDE_PATCH | 1.61 | 1.87 | 0 | 0 | 0 | Enhanced |
| 12808 | GO_PHOSPHATIDYLSERINE_BINDING                                     | 1.61 | 1.72 | 0 | 0 | 0 | Enhanced |
| 12809 | GO_REGULATION_OF_MACROPHAGE_ACTIVATION                            | 1.61 | 1.72 | 0 | 0 | 0 | Enhanced |
| 12810 | GO_POSITIVE_REGULATION_OF_INTERLEUKIN_4_PRODUCTION                | 1.61 | 1.71 | 0 | 0 | 0 | Enhanced |
| 12811 | GO_REGULATION_OF_MICROGLIAL_CELL_ACTIVATION                       | 1.61 | 1.71 | 0 | 0 | 0 | Enhanced |
| 12812 | GO_ASTROCYTE_ACTIVATION                                           | 1.61 | 1.7  | 0 | 0 | 0 | Enhanced |
| 12813 | GO_REGULATION_OF_HORMONE_METABOLIC_PROCESS                        | 1.61 | 1.69 | 0 | 0 | 0 | Enhanced |
| 12814 | BIOCARTA_MCM_PATHWAY                                              | 1.61 | 1.68 | 0 | 0 | 0 | Enhanced |
| 12815 | JOSEPH_RESPONSE_TO_SODIUM_BUTYRATE_UP                             | 1.61 | 1.65 | 0 | 0 | 0 | Enhanced |
| 12816 | REACTOME_ASSEMBLY_OF_COLLAGEN_FIBRILS_AND_OTHER_MULTIMERIC_STRUC  | 1.61 | 1.6  | 0 | 0 | 0 | Enhanced |
| 12817 | BILD_E2F3_ONCOGENIC_SIGNATURE                                     | 1.62 | 4    | 0 | 0 | 0 | Enhanced |
| 12818 | DACOSTA_UV_RESPONSE_VIA_ERCC3_UP                                  | 1.62 | 4    | 0 | 0 | 0 | Enhanced |
| 12819 | GO_B_CELL_ACTIVATION                                              | 1.62 | 4    | 0 | 0 | 0 | Enhanced |
| 12820 | GO_GOLGI_STACK                                                    | 1.62 | 4    | 0 | 0 | 0 | Enhanced |
| 12821 | GO_VACUOLAR_MEMBRANE                                              | 1.62 | 4    | 0 | 0 | 0 | Enhanced |
| 12822 | GO_VACUOLAR_PART                                                  | 1.62 | 4    | 0 | 0 | 0 | Enhanced |
| 12823 | ODONNELL_TFRC_TARGETS_UP                                          | 1.62 | 4    | 0 | 0 | 0 | Enhanced |
| 12824 | DAVICIONI_TARGETS_OF_PAX_FOXP1_FUSIONS_UP                         | 1.62 | 2.84 | 0 | 0 | 0 | Enhanced |
| 12825 | GO_POSITIVE_REGULATION_OF_LEUKOCYTE_MEDIATED_IMMUNITY             | 1.62 | 2.81 | 0 | 0 | 0 | Enhanced |
| 12826 | GO_T_CELL_PROLIFERATION                                           | 1.62 | 2.54 | 0 | 0 | 0 | Enhanced |
| 12827 | GO_POSITIVE_REGULATION_OF_ADAPTIVE_IMMUNE_RESPONSE                | 1.62 | 2.5  | 0 | 0 | 0 | Enhanced |
| 12828 | BMIT_DN_MEL18_DN.V1_UP                                            | 1.62 | 2.35 | 0 | 0 | 0 | Enhanced |
| 12829 | VERHAAK_GLIOMASTOMA_PRONEURAL                                     | 1.62 | 2.35 | 0 | 0 | 0 | Enhanced |
| 12830 | MORI_LARGE_PRE_BII_LYMPHOCYTE_DN                                  | 1.62 | 2.32 | 0 | 0 | 0 | Enhanced |
| 12831 | BURTON_ADIPOGENESIS_PEAK_AT_0HR                                   | 1.62 | 2.29 | 0 | 0 | 0 | Enhanced |
| 12832 | GO_INTRACELLULAR_CALCIIUM_ACTIVATED_CHLORIDE_CHANNEL_ACTIVITY     | 1.62 | 2.25 | 0 | 0 | 0 | Enhanced |
| 12833 | ESC_J1_UP_EARLY.V1_UP                                             | 1.62 | 2.23 | 0 | 0 | 0 | Enhanced |
| 12834 | GO_REGULATION_OF_INTERFERON_GAMMA_SECRETION                       | 1.62 | 2.23 | 0 | 0 | 0 | Enhanced |
| 12835 | SANA_TNF_SIGNALING_UP                                             | 1.62 | 2.2  | 0 | 0 | 0 | Enhanced |
| 12836 | WAMUNYOKOLI_OVARIAN_CANCER_GRADES_1_2_DN                          | 1.62 | 2.16 | 0 | 0 | 0 | Enhanced |
| 12837 | MORI_PRE_BI_LYMPHOCYTE_DN                                         | 1.62 | 2.12 | 0 | 0 | 0 | Enhanced |
| 12838 | BAKKER_FOXP3_TARGETS_UP                                           | 1.62 | 2.08 | 0 | 0 | 0 | Enhanced |
| 12839 | ONO_FOXP3_TARGETS_UP                                              | 1.62 | 2.05 | 0 | 0 | 0 | Enhanced |
| 12840 | GO_ENDOTHELIAL_CELL_PROLIFERATION                                 | 1.62 | 2.03 | 0 | 0 | 0 | Enhanced |
| 12841 | KRAS.BREAST_UP.V1_DN                                              | 1.62 | 2.03 | 0 | 0 | 0 | Enhanced |
| 12842 | BIOCARTA_ASBCELL_PATHWAY                                          | 1.62 | 2.02 | 0 | 0 | 0 | Enhanced |
| 12843 | GAUSSMANN_MLL_AF4_FUSION_TARGETS_E_UP                             | 1.62 | 2.02 | 0 | 0 | 0 | Enhanced |
| 12844 | GO_CD4_POSITIVE_ALPHA_BETA_T_CELL_CYTOKINE_PRODUCTION             | 1.62 | 1.96 | 0 | 0 | 0 | Enhanced |
| 12845 | REACTOME_ACYL_CHAIN_REMODELING_OF_PE                              | 1.62 | 1.95 | 0 | 0 | 0 | Enhanced |
| 12846 | NRL_DN.V1_DN                                                      | 1.62 | 1.94 | 0 | 0 | 0 | Enhanced |
| 12847 | SMID_BREAST_CANCER_LUMINAL_A_UP                                   | 1.62 | 1.89 | 0 | 0 | 0 | Enhanced |
| 12848 | GO_MHC_PROTEIN_COMPLEX                                            | 1.62 | 1.88 | 0 | 0 | 0 | Enhanced |
| 12849 | TARTE_PLASMA_CELL_VS_B_LYMPHOCYTE_DN                              | 1.62 | 1.86 | 0 | 0 | 0 | Enhanced |
| 12850 | GO_REGULATION_OF_SPROUTING_ANGIOGENESIS                           | 1.62 | 1.85 | 0 | 0 | 0 | Enhanced |

|       |                                                                          |      |      |   |   |   |          |
|-------|--------------------------------------------------------------------------|------|------|---|---|---|----------|
| 12851 | CHR5P12                                                                  | 1.62 | 1.84 | 0 | 0 | 0 | Enhanced |
| 12852 | VALK_AML_CLUSTER_4                                                       | 1.62 | 1.78 | 0 | 0 | 0 | Enhanced |
| 12853 | GO_SERINE_FAMILY_AMINO_ACID_BIOSYNTHETIC_PROCESS                         | 1.62 | 1.77 | 0 | 0 | 0 | Enhanced |
| 12854 | REACTOME_AFLATOXIN_ACTIVATION_AND_DETOXIFICATION                         | 1.62 | 1.77 | 0 | 0 | 0 | Enhanced |
| 12855 | BIOCARTA_EPO_PATHWAY                                                     | 1.62 | 1.75 | 0 | 0 | 0 | Enhanced |
| 12856 | REACTOME_INTERLEUKIN_9_SIGNALING                                         | 1.62 | 1.75 | 0 | 0 | 0 | Enhanced |
| 12857 | GO_REGULATION_OF_CHOLESTEROL_METABOLIC_PROCESS                           | 1.62 | 1.73 | 0 | 0 | 0 | Enhanced |
| 12858 | GO_NEGATIVE_REGULATION_OF_INTERLEUKIN_1_SECRETION                        | 1.62 | 1.69 | 0 | 0 | 0 | Enhanced |
| 12859 | ZHENG_IL22_SIGNALING_UP                                                  | 1.62 | 1.55 | 0 | 0 | 0 | Enhanced |
| 12860 | AKT_UP.V1_DN                                                             | 1.63 | 4    | 0 | 0 | 0 | Enhanced |
| 12861 | FEVR_CTNNB1_TARGETS_UP                                                   | 1.63 | 4    | 0 | 0 | 0 | Enhanced |
| 12862 | GO_CELL_CHEMOTAXIS                                                       | 1.63 | 2.84 | 0 | 0 | 0 | Enhanced |
| 12863 | HALLMARK_HYPOXIA                                                         | 1.63 | 2.83 | 0 | 0 | 0 | Enhanced |
| 12864 | GCNP_SHH_UP_EARLY.V1_DN                                                  | 1.63 | 2.81 | 0 | 0 | 0 | Enhanced |
| 12865 | GAUSSMANN_MLL_AF4_FUSION_TARGETS_F_UP                                    | 1.63 | 2.8  | 0 | 0 | 0 | Enhanced |
| 12866 | SERVITJA_ISLET_HNF1A_TARGETS_UP                                          | 1.63 | 2.8  | 0 | 0 | 0 | Enhanced |
| 12867 | SHAFFER_IRF4_TARGETS_IN_PLASMA_CELL_VS_MATURE_B_LYMPHOCYTE               | 1.63 | 2.5  | 0 | 0 | 0 | Enhanced |
| 12868 | GO_TRANSPORTER_COMPLEX                                                   | 1.63 | 2.38 | 0 | 0 | 0 | Enhanced |
| 12869 | ZHAN_EARLY_DIFFERENTIATION_GENES_UP                                      | 1.63 | 2.37 | 0 | 0 | 0 | Enhanced |
| 12870 | MTOR_UP.V1_DN                                                            | 1.63 | 2.35 | 0 | 0 | 0 | Enhanced |
| 12871 | GO_B_CELL_ACTIVATION_INVOLVED_IN_IMMUNE_RESPONSE                         | 1.63 | 2.32 | 0 | 0 | 0 | Enhanced |
| 12872 | GO_AMINO_ACID_TRANSMEMBRANE_TRANSPORT                                    | 1.63 | 2.18 | 0 | 0 | 0 | Enhanced |
| 12873 | ZHANG_TLX_TARGETS_UP                                                     | 1.63 | 2.13 | 0 | 0 | 0 | Enhanced |
| 12874 | BOYLAN_MULTIPLE_MYELOMA_PCA1_UP                                          | 1.63 | 2.02 | 0 | 0 | 0 | Enhanced |
| 12875 | GO_DEFENSE_RESPONSE_TO_GRAM_POSITIVE_BACTERIUM                           | 1.63 | 2    | 0 | 0 | 0 | Enhanced |
| 12876 | REACTOME_SIGNALING_BY_LEPTIN                                             | 1.63 | 1.96 | 0 | 0 | 0 | Enhanced |
| 12877 | GO_REGULATION_OF_NATURAL_KILLER_CELL_MEDIATED_IMMUNITY                   | 1.63 | 1.92 | 0 | 0 | 0 | Enhanced |
| 12878 | GO_TOLERANCE_INDUCTION                                                   | 1.63 | 1.91 | 0 | 0 | 0 | Enhanced |
| 12879 | GO_AMMONIUM_TRANSMEMBRANE_TRANSPORTER_ACTIVITY                           | 1.63 | 1.9  | 0 | 0 | 0 | Enhanced |
| 12880 | GO_INTERLEUKIN_4_PRODUCTION                                              | 1.63 | 1.9  | 0 | 0 | 0 | Enhanced |
| 12881 | PLASARI_TGFB1_SIGNALING_VIA_NFIC_10HR_DN                                 | 1.63 | 1.89 | 0 | 0 | 0 | Enhanced |
| 12882 | GO_ANCHORED_COMPONENT_OF_PLASMA_MEMBRANE                                 | 1.63 | 1.86 | 0 | 0 | 0 | Enhanced |
| 12883 | GO_NONRIBOSOMAL_PEPTIDE_BIOSYNTHETIC_PROCESS                             | 1.63 | 1.8  | 0 | 0 | 0 | Enhanced |
| 12884 | REACTOME_DISEASES_ASSOCIATED_WITH_GLYCOSAMINOGLYCAN_METABOLISM           | 1.63 | 1.8  | 0 | 0 | 0 | Enhanced |
| 12885 | CHEOK_RESPONSE_TO_HD_MTX_UP                                              | 1.63 | 1.79 | 0 | 0 | 0 | Enhanced |
| 12886 | PID_IL4_2PATHWAY                                                         | 1.63 | 1.79 | 0 | 0 | 0 | Enhanced |
| 12887 | REACTOME_OTHER_SEMAPHORIN_INTERACTIONS                                   | 1.63 | 1.78 | 0 | 0 | 0 | Enhanced |
| 12888 | TSAL_DNAJB4_TARGETS_UP                                                   | 1.63 | 1.78 | 0 | 0 | 0 | Enhanced |
| 12889 | YU_MYC_TARGETS_DN                                                        | 1.63 | 1.74 | 0 | 0 | 0 | Enhanced |
| 12890 | GO_POSITIVE_REGULATION_OF_INTERLEUKIN_2_PRODUCTION                       | 1.63 | 1.65 | 0 | 0 | 0 | Enhanced |
| 12891 | GO_SIDE_OF_MEMBRANE                                                      | 1.64 | 4    | 0 | 0 | 0 | Enhanced |
| 12892 | HUTTMANN_B_CELL_POOR_SURVIVAL_UP                                         | 1.64 | 4    | 0 | 0 | 0 | Enhanced |
| 12893 | SENESE_HDAC1_AND_HDAC2_TARGETS_DN                                        | 1.64 | 4    | 0 | 0 | 0 | Enhanced |
| 12894 | GO_GATED_CHANNEL_ACTIVITY                                                | 1.64 | 2.83 | 0 | 0 | 0 | Enhanced |
| 12895 | CAIRO_LIVER_DEVELOPMENT_DN                                               | 1.64 | 2.81 | 0 | 0 | 0 | Enhanced |
| 12896 | EGFR_UP.V1_UP                                                            | 1.64 | 2.81 | 0 | 0 | 0 | Enhanced |
| 12897 | GO_RESPONSE_TO_CORTICOSTEROID                                            | 1.64 | 2.81 | 0 | 0 | 0 | Enhanced |
| 12898 | MARKEY_RB1_CHRONIC_LOF_UP                                                | 1.64 | 2.79 | 0 | 0 | 0 | Enhanced |
| 12899 | MOROSETTI_FACIOSCAPULOHUMERAL_MUSCULAR_DISTROPHY_DN                      | 1.64 | 2.68 | 0 | 0 | 0 | Enhanced |
| 12900 | GO_RECEPTOR_SIGNALING_PATHWAY_VIA_STAT                                   | 1.64 | 2.51 | 0 | 0 | 0 | Enhanced |
| 12901 | GO_ENDOTHELIAL_CELL_MIGRATION                                            | 1.64 | 2.36 | 0 | 0 | 0 | Enhanced |
| 12902 | GO_POSITIVE_REGULATION_OF_VASCULATURE_DEVELOPMENT                        | 1.64 | 2.24 | 0 | 0 | 0 | Enhanced |
| 12903 | MURAKAMI_UV_RESPONSE_1HR_DN                                              | 1.64 | 2.22 | 0 | 0 | 0 | Enhanced |
| 12904 | GO_LEUKOCYTE_MEDIATED_CYTOTOXICITY                                       | 1.64 | 2.21 | 0 | 0 | 0 | Enhanced |
| 12905 | BURTON_ADIPOGENESIS_9                                                    | 1.64 | 2.2  | 0 | 0 | 0 | Enhanced |
| 12906 | REACTOME_CHONDROITIN_SULFATE_DERMATAN_SULFATE_METABOLISM                 | 1.64 | 2.16 | 0 | 0 | 0 | Enhanced |
| 12907 | KRAS.300_UP.V1_DN                                                        | 1.64 | 2.12 | 0 | 0 | 0 | Enhanced |
| 12908 | REACTOME_TP53_REGULATES_TRANSCRIPTION_OF_GENES_INVOLVED_IN_G1_CELL_CYCLE | 1.64 | 2.12 | 0 | 0 | 0 | Enhanced |
| 12909 | HANN_RESISTANCE_TO_BCL2_INHIBITOR_DN                                     | 1.64 | 2.05 | 0 | 0 | 0 | Enhanced |
| 12910 | GO_HYDROLASE_ACTIVITY_ACTING_ON_GLYCOSYL_BONDS                           | 1.64 | 2.04 | 0 | 0 | 0 | Enhanced |
| 12911 | CHUNG_BLISTER_CYTOTOXICITY_DN                                            | 1.64 | 2.01 | 0 | 0 | 0 | Enhanced |
| 12912 | ZHANG_GATA6_TARGETS_DN                                                   | 1.64 | 1.99 | 0 | 0 | 0 | Enhanced |
| 12913 | PID_HNF3A_PATHWAY                                                        | 1.64 | 1.92 | 0 | 0 | 0 | Enhanced |
| 12914 | GO_PROTEOGLYCAN_BINDING                                                  | 1.64 | 1.89 | 0 | 0 | 0 | Enhanced |
| 12915 | AMIT_EGF_RESPONSE_40_MCF10A                                              | 1.64 | 1.85 | 0 | 0 | 0 | Enhanced |
| 12916 | GO_BASAL_PART_OF_CELL                                                    | 1.64 | 1.82 | 0 | 0 | 0 | Enhanced |
| 12917 | REACTOME_HS_GAG_DEGRADATION                                              | 1.64 | 1.79 | 0 | 0 | 0 | Enhanced |
| 12918 | ZHU_SKIL_TARGETS_UP                                                      | 1.64 | 1.79 | 0 | 0 | 0 | Enhanced |
| 12919 | GO_RESPONSE_TO_LAMINAR_FLUID_SHEAR_STRESS                                | 1.64 | 1.74 | 0 | 0 | 0 | Enhanced |
| 12920 | WATTEL_AUTONOMOUS_THYROID_ADENOMA_DN                                     | 1.64 | 1.69 | 0 | 0 | 0 | Enhanced |
| 12921 | GO_ANTIGEN_PROCESSING_AND_PRESENTATION_VIA_MHC_CLASS_II                  | 1.64 | 1.55 | 0 | 0 | 0 | Enhanced |
| 12922 | BASAKI_YBX1_TARGETS_DN                                                   | 1.65 | 4    | 0 | 0 | 0 | Enhanced |
| 12923 | GO_LEUKOCYTE_MIGRATION                                                   | 1.65 | 4    | 0 | 0 | 0 | Enhanced |
| 12924 | GO_RESPONSE_TO_MOLECULE_OF_BACTERIAL_ORIGIN                              | 1.65 | 4    | 0 | 0 | 0 | Enhanced |
| 12925 | REACTOME_ERYTHROPOIETIN_ACTIVATES_STAT5                                  | 1.65 | 4    | 0 | 0 | 0 | Enhanced |
| 12926 | GO_CELLULAR_RESPONSE_TO_XENOBIOTIC_STIMULUS                              | 1.65 | 2.79 | 0 | 0 | 0 | Enhanced |
| 12927 | REACTOME_INTERFERON_ALPHA_BETA_SIGNALING                                 | 1.65 | 2.78 | 0 | 0 | 0 | Enhanced |
| 12928 | KRAS.600_UP.V1_UP                                                        | 1.65 | 2.54 | 0 | 0 | 0 | Enhanced |
| 12929 | REACTOME_DEGRADATION_OF_THE_EXTRACELLULAR_MATRIX                         | 1.65 | 2.5  | 0 | 0 | 0 | Enhanced |
| 12930 | GO_POSITIVE_REGULATION_OF_ENDOTHELIAL_CELL_PROLIFERATION                 | 1.65 | 2.31 | 0 | 0 | 0 | Enhanced |
| 12931 | GO_STEROL_TRANSPORT                                                      | 1.65 | 2.3  | 0 | 0 | 0 | Enhanced |
| 12932 | KEGG_GRAFT_VERSUS_HOST_DISEASE                                           | 1.65 | 2.25 | 0 | 0 | 0 | Enhanced |
| 12933 | KEGG_NEUROACTIVE_LIGAND_RECEPTOR_INTERACTION                             | 1.65 | 2.2  | 0 | 0 | 0 | Enhanced |
| 12934 | TOMIDA_METASTASIS_DN                                                     | 1.65 | 2.05 | 0 | 0 | 0 | Enhanced |
| 12935 | SCHWAB_TARGETS_OF_BMYB_POLYMORPHIC_VARIANTS_DN                           | 1.65 | 1.97 | 0 | 0 | 0 | Enhanced |
| 12936 | REACTOME_ANTIMICROBIAL_PEPTIDES                                          | 1.65 | 1.96 | 0 | 0 | 0 | Enhanced |
| 12937 | GO_NEGATIVE_REGULATION_OF_INTERLEUKIN_1_BETA_PRODUCTION                  | 1.65 | 1.95 | 0 | 0 | 0 | Enhanced |
| 12938 | CTIP_DN.V1_UP                                                            | 1.65 | 1.94 | 0 | 0 | 0 | Enhanced |
| 12939 | REACTOME_DNA_STRAND_ELONGATION                                           | 1.65 | 1.93 | 0 | 0 | 0 | Enhanced |
| 12940 | GO_NEGATIVE_REGULATION_OF_LEUKOCYTE_MIGRATION                            | 1.65 | 1.92 | 0 | 0 | 0 | Enhanced |
| 12941 | GO_POSITIVE_REGULATION_OF_REACTIVE_OXYGEN_SPECIES_BIOSYNTHETIC_PROCESS   | 1.65 | 1.88 | 0 | 0 | 0 | Enhanced |
| 12942 | GO_CELLULAR_RESPONSE_TO_LAMINAR_FLUID_SHEAR_STRESS                       | 1.65 | 1.82 | 0 | 0 | 0 | Enhanced |
| 12943 | GO_NEGATIVE_REGULATION_OF_I_KAPPAB_KINASE_NF_KAPPAB_SIGNALING            | 1.65 | 1.74 | 0 | 0 | 0 | Enhanced |
| 12944 | PID_IL27_PATHWAY                                                         | 1.65 | 1.66 | 0 | 0 | 0 | Enhanced |
| 12945 | GRANDVAUX_IRF3_TARGETS_DN                                                | 1.65 | 1.64 | 0 | 0 | 0 | Enhanced |
| 12946 | GO_ENDOPLASMIC_RETICULUM_LUMEN                                           | 1.66 | 4    | 0 | 0 | 0 | Enhanced |
| 12947 | GO_REGULATION_OF_VASCULATURE_DEVELOPMENT                                 | 1.66 | 4    | 0 | 0 | 0 | Enhanced |
| 12948 | GO_T_CELL_ACTIVATION                                                     | 1.66 | 4    | 0 | 0 | 0 | Enhanced |
| 12949 | GO_VACUOLE                                                               | 1.66 | 4    | 0 | 0 | 0 | Enhanced |
| 12950 | KRAS.DF.V1_UP                                                            | 1.66 | 2.84 | 0 | 0 | 0 | Enhanced |
| 12951 | FLOTHO_PEDIATRIC_ALL_THERAPY_RESPONSE_UP                                 | 1.66 | 2.77 | 0 | 0 | 0 | Enhanced |
| 12952 | GO_ORGANIC_ACID_TRANSMEMBRANE_TRANSPORTER_ACTIVITY                       | 1.66 | 2.5  | 0 | 0 | 0 | Enhanced |
| 12953 | VANLOO_SP3_TARGETS_DN                                                    | 1.66 | 2.49 | 0 | 0 | 0 | Enhanced |
| 12954 | GO_NEGATIVE_REGULATION_OF_LEUKOCYTE_CHEMOTAXIS                           | 1.66 | 2.42 | 0 | 0 | 0 | Enhanced |
| 12955 | TIAN_BHLHA15_TARGETS                                                     | 1.66 | 2.42 | 0 | 0 | 0 | Enhanced |
| 12956 | REACTOME_ACTIVATION_OF_THE_AP_1_FAMILY_OF_TRANSCRIPTION_FACTORS          | 1.66 | 2.41 | 0 | 0 | 0 | Enhanced |
| 12957 | GO_LIPID_HOMEOSTASIS                                                     | 1.66 | 2.36 | 0 | 0 | 0 | Enhanced |
| 12958 | HU_ANGIOGENESIS_UP                                                       | 1.66 | 2.16 | 0 | 0 | 0 | Enhanced |
| 12959 | GO_OXIDOREDUCTASE_ACTIVITY_ACTING_ON_THE_CH_CH_GROUP_OF_DONORS           | 1.66 | 2.15 | 0 | 0 | 0 | Enhanced |

|       |                                                                    |      |      |   |   |   |          |
|-------|--------------------------------------------------------------------|------|------|---|---|---|----------|
| 12960 | GO_REGULATION_OF_INTERLEUKIN_4_PRODUCTION                          | 1.66 | 2.15 | 0 | 0 | 0 | Enhanced |
| 12961 | GO_POSITIVE_REGULATION_OF_T_CELL_MEDIATED_CYTOTOXICITY             | 1.66 | 2.14 | 0 | 0 | 0 | Enhanced |
| 12962 | GO_TYPE_B_PANCREATIC_CELL_PROLIFERATION                            | 1.66 | 2.12 | 0 | 0 | 0 | Enhanced |
| 12963 | INGRAM_SHH_TARGETS_DN                                              | 1.66 | 2.07 | 0 | 0 | 0 | Enhanced |
| 12964 | DACOSTA_ERCC3_ALLELE_XPCS_VS_TTD_DN                                | 1.66 | 2.06 | 0 | 0 | 0 | Enhanced |
| 12965 | GO_POSITIVE_REGULATION_OF_NITRIC_OXIDE_BIOSYNTHETIC_PROCESS        | 1.66 | 2.06 | 0 | 0 | 0 | Enhanced |
| 12966 | MARIADASON_RESPONSE_TO_BUTYRATE_CURCUMIN_SULINDAC_TSA_1            | 1.66 | 2.03 | 0 | 0 | 0 | Enhanced |
| 12967 | KEGG_ASTHMA                                                        | 1.66 | 2.02 | 0 | 0 | 0 | Enhanced |
| 12968 | DAZARD_UV_RESPONSE_CLUSTER_G3                                      | 1.66 | 1.96 | 0 | 0 | 0 | Enhanced |
| 12969 | GO_COLLAGEN_CATABOLIC_PROCESS                                      | 1.66 | 1.96 | 0 | 0 | 0 | Enhanced |
| 12970 | GO_ACUTE_INFLAMMATORY_RESPONSE                                     | 1.66 | 1.95 | 0 | 0 | 0 | Enhanced |
| 12971 | GO_REGULATION_OF_NEUROINFLAMMATORY_RESPONSE                        | 1.66 | 1.94 | 0 | 0 | 0 | Enhanced |
| 12972 | ALK_DN.V1_DN                                                       | 1.66 | 1.92 | 0 | 0 | 0 | Enhanced |
| 12973 | BIOCARTA_IL10_PATHWAY                                              | 1.66 | 1.89 | 0 | 0 | 0 | Enhanced |
| 12974 | GO_BASAL_PLASMA_MEMBRANE                                           | 1.66 | 1.89 | 0 | 0 | 0 | Enhanced |
| 12975 | XU_HGF_SIGNALING_NOT_VIA_AKT1_48HR_UP                              | 1.66 | 1.87 | 0 | 0 | 0 | Enhanced |
| 12976 | ROSS_AML_WITH_CBF3_MYH11_FUSION                                    | 1.66 | 1.86 | 0 | 0 | 0 | Enhanced |
| 12977 | GO_CELLULAR_RESPONSE_TO_CHOLESTEROL                                | 1.66 | 1.79 | 0 | 0 | 0 | Enhanced |
| 12978 | GO_INTERLEUKIN_8_BIOSYNTHETIC_PROCESS                              | 1.67 | 4    | 0 | 0 | 0 | Enhanced |
| 12979 | GO_LEUKOCYTE_DIFFERENTIATION                                       | 1.67 | 4    | 0 | 0 | 0 | Enhanced |
| 12980 | HAMAI_APOPTOSIS_VIA_TRAIL_DN                                       | 1.67 | 4    | 0 | 0 | 0 | Enhanced |
| 12981 | REACTOME_TYPE_I_HEMIDESMOSOME_ASSEMBLY                             | 1.67 | 4    | 0 | 0 | 0 | Enhanced |
| 12982 | TAKEDA_TARGETS_OF_NUP98_HOXA9_FUSION_3D_UP                         | 1.67 | 4    | 0 | 0 | 0 | Enhanced |
| 12983 | GO_REGULATION_OF_LYMPHOCYTE_MEDIATED_IMMUNITY                      | 1.67 | 2.8  | 0 | 0 | 0 | Enhanced |
| 12984 | GO_ORGANIC_ANION_TRANSMEMBRANE_TRANSPORTER_ACTIVITY                | 1.67 | 2.53 | 0 | 0 | 0 | Enhanced |
| 12985 | GO_SODIUM_ION_TRANSMEMBRANE_TRANSPORTER_ACTIVITY                   | 1.67 | 2.5  | 0 | 0 | 0 | Enhanced |
| 12986 | GO_RESPONSE_TO_ANTINEOPLASTIC_AGENT                                | 1.67 | 2.34 | 0 | 0 | 0 | Enhanced |
| 12987 | ONC_AML1_TARGETS_UP                                                | 1.67 | 2.27 | 0 | 0 | 0 | Enhanced |
| 12988 | HUMMEL_BURKITT'S_LYMPHOMA_DN                                       | 1.67 | 2.26 | 0 | 0 | 0 | Enhanced |
| 12989 | DUTERTRE ESTRADIOL_RESPONSE_6HR_DN                                 | 1.67 | 2.19 | 0 | 0 | 0 | Enhanced |
| 12990 | NIELSEN_GIST_AND_SYNOVIAL_SARCOMA_UP                               | 1.67 | 2.12 | 0 | 0 | 0 | Enhanced |
| 12991 | LEI_HOXC8_TARGETS_DN                                               | 1.67 | 2.1  | 0 | 0 | 0 | Enhanced |
| 12992 | GO_SPLEEN_DEVELOPMENT                                              | 1.67 | 2.05 | 0 | 0 | 0 | Enhanced |
| 12993 | ZHANG_INTERFERON_RESPONSE                                          | 1.67 | 2.04 | 0 | 0 | 0 | Enhanced |
| 12994 | GO_RESPONSE_TO_PROTOZOAN                                           | 1.67 | 2.02 | 0 | 0 | 0 | Enhanced |
| 12995 | SABATES_COLORECTAL_ADENOMA_UP                                      | 1.67 | 2.01 | 0 | 0 | 0 | Enhanced |
| 12996 | GO_POSITIVE_REGULATION_OF_ENDOTHELIAL_CELL_APOPTOTIC_PROCESS       | 1.67 | 1.98 | 0 | 0 | 0 | Enhanced |
| 12997 | GO_NEGATIVE_REGULATION_OF_INTERLEUKIN_1_BETA_SECRETION             | 1.67 | 1.94 | 0 | 0 | 0 | Enhanced |
| 12998 | GAUSSMANN_MLL_AF4_FUSION_TARGETS_E_DN                              | 1.67 | 1.9  | 0 | 0 | 0 | Enhanced |
| 12999 | PID_NFKAPPAB_ATYPICAL_PATHWAY                                      | 1.67 | 1.9  | 0 | 0 | 0 | Enhanced |
| 13000 | WU_SILENCED_BY_METHYLATION_IN_BLADDER_CANCER                       | 1.67 | 1.86 | 0 | 0 | 0 | Enhanced |
| 13001 | GO_RESPONSE_TO_ACIDIC_PH                                           | 1.67 | 1.82 | 0 | 0 | 0 | Enhanced |
| 13002 | PID_INTEGRIN2_PATHWAY                                              | 1.67 | 1.78 | 0 | 0 | 0 | Enhanced |
| 13003 | GO_POSITIVE_REGULATION_OF_RHO_PROTEIN_SIGNAL_TRANSDUCTION          | 1.67 | 1.74 | 0 | 0 | 0 | Enhanced |
| 13004 | BUSA_SAM68_TARGETS_UP                                              | 1.68 | 4    | 0 | 0 | 0 | Enhanced |
| 13005 | ELVIDGE_HYPOXIA_UP                                                 | 1.68 | 4    | 0 | 0 | 0 | Enhanced |
| 13006 | KRIGE_RESPONSE_TO_TOSEDOSTAT_6HR_UP                                | 1.68 | 4    | 0 | 0 | 0 | Enhanced |
| 13007 | VERHAAK_GLIOMASTOMA_MESENCHYMAL                                    | 1.68 | 4    | 0 | 0 | 0 | Enhanced |
| 13008 | CHANDRAN_METASTASIS_DN                                             | 1.68 | 2.84 | 0 | 0 | 0 | Enhanced |
| 13009 | GO_TUMOR_NECROSIS_FACTOR_SUPERFAMILY_CYTOKINE_PRODUCTION           | 1.68 | 2.52 | 0 | 0 | 0 | Enhanced |
| 13010 | GO_GAMMA_DELTA_T_CELL_DIFFERENTIATION                              | 1.68 | 2.41 | 0 | 0 | 0 | Enhanced |
| 13011 | KANG_IMMORTALIZED_BY_TERT_DN                                       | 1.68 | 2.34 | 0 | 0 | 0 | Enhanced |
| 13012 | GO_BICARBONATE_TRANSMEMBRANE_TRANSPORTER_ACTIVITY                  | 1.68 | 2.24 | 0 | 0 | 0 | Enhanced |
| 13013 | SAGIV_CD24_TARGETS_DN                                              | 1.68 | 2.19 | 0 | 0 | 0 | Enhanced |
| 13014 | NAKAYAMA_FRA2_TARGETS                                              | 1.68 | 2.17 | 0 | 0 | 0 | Enhanced |
| 13015 | GO_REGULATION_OF_T_CELL_MEDIATED_CYTOTOXICITY                      | 1.68 | 2.16 | 0 | 0 | 0 | Enhanced |
| 13016 | GO_CHOLESTEROL_TRANSPORTER_ACTIVITY                                | 1.68 | 2.1  | 0 | 0 | 0 | Enhanced |
| 13017 | DAVICIONI_PAX_FOXO1_SIGNATURE_IN_ARMS_UP                           | 1.68 | 2.08 | 0 | 0 | 0 | Enhanced |
| 13018 | GO_AMMONIUM_TRANSPORT                                              | 1.68 | 2.08 | 0 | 0 | 0 | Enhanced |
| 13019 | GO_HUMORAL_IMMUNE_RESPONSE_MEDIATED_BY_CIRCULATING_IMMUNOGLOBULIN  | 1.68 | 2.07 | 0 | 0 | 0 | Enhanced |
| 13020 | SCHOEN_NFKB_SIGNALING                                              | 1.68 | 2.05 | 0 | 0 | 0 | Enhanced |
| 13021 | STEARMAN_TUMOR_FIELD_EFFECT_UP                                     | 1.68 | 2.04 | 0 | 0 | 0 | Enhanced |
| 13022 | REACTOME_AKT_PHOSPHORYLATES_TARGETS_IN_THE_NUCLEUS                 | 1.68 | 2.02 | 0 | 0 | 0 | Enhanced |
| 13023 | GO_CHLORIDE_CHANNEL_COMPLEX                                        | 1.68 | 1.97 | 0 | 0 | 0 | Enhanced |
| 13024 | GO_MATURE_B_CELL_DIFFERENTIATION_INVOLVED_IN_IMMUNE_RESPONSE       | 1.68 | 1.97 | 0 | 0 | 0 | Enhanced |
| 13025 | LIAN_NEUTROPHIL_GRANULE_CONSTITUENTS                               | 1.68 | 1.96 | 0 | 0 | 0 | Enhanced |
| 13026 | REACTOME_INTERLEUKIN_21_SIGNALING                                  | 1.68 | 1.94 | 0 | 0 | 0 | Enhanced |
| 13027 | DUNNE_TARGETS_OF_AML1_MTG8_FUSION_UP                               | 1.68 | 1.9  | 0 | 0 | 0 | Enhanced |
| 13028 | REACTOME_HEPARAN_SULFATE_HEPARIN_HS_GAG_METABOLISM                 | 1.68 | 1.77 | 0 | 0 | 0 | Enhanced |
| 13029 | GO_ION_TRANSMEMBRANE_TRANSPORTER_ACTIVITY                          | 1.69 | 4    | 0 | 0 | 0 | Enhanced |
| 13030 | GO_ORGANIC_HYDROXY_COMPOUND_METABOLIC_PROCESS                      | 1.69 | 4    | 0 | 0 | 0 | Enhanced |
| 13031 | GO_REGULATION_OF_LIPID_BIOSYNTHETIC_PROCESS                        | 1.69 | 4    | 0 | 0 | 0 | Enhanced |
| 13032 | GO_T_HELPER_2_CELL_CYTOKINE_PRODUCTION                             | 1.69 | 4    | 0 | 0 | 0 | Enhanced |
| 13033 | GO_TRANSMEMBRANE_TRANSPORTER_ACTIVITY                              | 1.69 | 4    | 0 | 0 | 0 | Enhanced |
| 13034 | HELLER_SILENCED_BY_METHYLATION_DN                                  | 1.69 | 4    | 0 | 0 | 0 | Enhanced |
| 13035 | HESS_TARGETS_OF_HOXA9_AND_MEI1_DN                                  | 1.69 | 4    | 0 | 0 | 0 | Enhanced |
| 13036 | REACTOME_GPCR_LIGAND_BINDING                                       | 1.69 | 4    | 0 | 0 | 0 | Enhanced |
| 13037 | YAGI_AML_FAB_MARKERS                                               | 1.69 | 4    | 0 | 0 | 0 | Enhanced |
| 13038 | ZHANG_TLX_TARGETS_60HR_UP                                          | 1.69 | 2.86 | 0 | 0 | 0 | Enhanced |
| 13039 | VEGF_A_UP.V1_UP                                                    | 1.69 | 2.82 | 0 | 0 | 0 | Enhanced |
| 13040 | ZWANG_EGF_INTERVAL_DN                                              | 1.69 | 2.82 | 0 | 0 | 0 | Enhanced |
| 13041 | GO_MARGINAL_ZONE_B_CELL_DIFFERENTIATION                            | 1.69 | 2.7  | 0 | 0 | 0 | Enhanced |
| 13042 | REACTOME_CLASS_A_T_RHODOPSIN_LIKE_RECEPTORS                        | 1.69 | 2.5  | 0 | 0 | 0 | Enhanced |
| 13043 | BAE_BRCA1_TARGETS_UP                                               | 1.69 | 2.49 | 0 | 0 | 0 | Enhanced |
| 13044 | SCHRAETS_MLL_TARGETS_UP                                            | 1.69 | 2.42 | 0 | 0 | 0 | Enhanced |
| 13045 | VANHARANTA_UTERINE_FIBROID_DN                                      | 1.69 | 2.32 | 0 | 0 | 0 | Enhanced |
| 13046 | GO_NEUTRAL_AMINO_ACID_TRANSPORT                                    | 1.69 | 2.29 | 0 | 0 | 0 | Enhanced |
| 13047 | BOYLAN_MULTIPLE_MYELOMA_D_DN                                       | 1.69 | 2.2  | 0 | 0 | 0 | Enhanced |
| 13048 | GO_HYDROLASE_ACTIVITY_HYDROLYZING_O_GLYCOSYL_COMPOUNDS             | 1.69 | 2.2  | 0 | 0 | 0 | Enhanced |
| 13049 | GO_INTERLEUKIN_2_PRODUCTION                                        | 1.69 | 2.2  | 0 | 0 | 0 | Enhanced |
| 13050 | PACHER_TARGETS_OF_IGF1_AND_IGF2_UP                                 | 1.69 | 2.17 | 0 | 0 | 0 | Enhanced |
| 13051 | GO_ALPHA_BETA_T_CELL_PROLIFERATION                                 | 1.69 | 2.16 | 0 | 0 | 0 | Enhanced |
| 13052 | GO_POSITIVE_REGULATION_OF_NATURAL_KILLER_CELL_MEDIATED_IMMUNITY    | 1.69 | 2.16 | 0 | 0 | 0 | Enhanced |
| 13053 | GO_MATURE_B_CELL_DIFFERENTIATION                                   | 1.69 | 2.15 | 0 | 0 | 0 | Enhanced |
| 13054 | GO_NEGATIVE_REGULATION_OF_SPROUTING_ANGIOGENESIS                   | 1.69 | 2.14 | 0 | 0 | 0 | Enhanced |
| 13055 | TIAN_TNF_SIGNALING_VIA_NFKB                                        | 1.69 | 2.14 | 0 | 0 | 0 | Enhanced |
| 13056 | REACTOME_ACTIVATION_OF_MATRIX_METALLOPROTEINASES                   | 1.69 | 2.13 | 0 | 0 | 0 | Enhanced |
| 13057 | HELLEBREKERS_SILENCED_DURING_TUMOR_ANGIOGENESIS                    | 1.69 | 2.1  | 0 | 0 | 0 | Enhanced |
| 13058 | LOPES_METHYLATED_IN_COLON_CANCER_UP                                | 1.69 | 1.97 | 0 | 0 | 0 | Enhanced |
| 13059 | GO_CELLULAR_RESPONSE_TO_FLUID_SHEAR_STRESS                         | 1.69 | 1.96 | 0 | 0 | 0 | Enhanced |
| 13060 | GO_NEGATIVE_REGULATION_OF_FAT_CELL_DIFFERENTIATION                 | 1.69 | 1.94 | 0 | 0 | 0 | Enhanced |
| 13061 | GO_CALCIIUM_DEPENDING_CELL_CELL_ADHESION_VIA_PLASMA_MEMBRANE_CELL  | 1.69 | 1.88 | 0 | 0 | 0 | Enhanced |
| 13062 | GO_REGULATION_OF_HORMONE_BIOSYNTHETIC_PROCESS                      | 1.69 | 1.75 | 0 | 0 | 0 | Enhanced |
| 13063 | ELVIDGE_HYPOXIA_BY_DMOG_UP                                         | 1.70 | 4    | 0 | 0 | 0 | Enhanced |
| 13064 | GO_ACTIVE_TRANSMEMBRANE_TRANSPORTER_ACTIVITY                       | 1.70 | 4    | 0 | 0 | 0 | Enhanced |
| 13065 | GO_CELL_MIGRATION_INVOLVED_IN_SPROUTING_ANGIOGENESIS               | 1.70 | 4    | 0 | 0 | 0 | Enhanced |
| 13066 | GO_PHOSPHOLIPASE_C_ACTIVATING_G_PROTEIN_COUPLED_RECEPTOR_SIGNALING | 1.70 | 4    | 0 | 0 | 0 | Enhanced |
| 13067 | COUYER_TATI_TARGETS_DN                                             | 1.70 | 4    | 0 | 0 | 0 | Enhanced |
| 13068 | JAATINEN_HEMATOPOIETIC_STEM_CELL_DN                                | 1.70 | 4    | 0 | 0 | 0 | Enhanced |

|       |                                                                 |      |      |   |   |   |          |
|-------|-----------------------------------------------------------------|------|------|---|---|---|----------|
| 13069 | RB_P107_DNV1_UP                                                 | 1.70 | 4    | 0 | 0 | 0 | Enhanced |
| 13070 | SENESE_HDAC1_TARGETS_DN                                         | 1.70 | 2.83 | 0 | 0 | 0 | Enhanced |
| 13071 | FOSTER_TOLERANT_MACROPHAGE_UP                                   | 1.70 | 2.82 | 0 | 0 | 0 | Enhanced |
| 13072 | KIM_MYCN_AMPLIFICATION_TARGETS_DN                               | 1.70 | 2.81 | 0 | 0 | 0 | Enhanced |
| 13073 | GO_REGULATION_OF_NIK_NF_KAPPAB_SIGNALING                        | 1.70 | 2.8  | 0 | 0 | 0 | Enhanced |
| 13074 | SUNG_METASTASIS_STROMA_UP                                       | 1.70 | 2.51 | 0 | 0 | 0 | Enhanced |
| 13075 | PID_IL12_2PATHWAY                                               | 1.70 | 2.32 | 0 | 0 | 0 | Enhanced |
| 13076 | GO_POSITIVE_REGULATION_OF_EPITHELIAL_CELL_PROLIFERATION         | 1.70 | 2.22 | 0 | 0 | 0 | Enhanced |
| 13077 | GO_GOLGI_CISTERNA_MEMBRANE                                      | 1.70 | 2.19 | 0 | 0 | 0 | Enhanced |
| 13078 | GO_ANTIGEN_PROCESSING_AND_PRESENTATION_OF_ENDOGENOUS_ANTIGEN    | 1.70 | 2.15 | 0 | 0 | 0 | Enhanced |
| 13079 | GO_POSITIVE_REGULATION_OF_T_CELL_MEDIATED_IMMUNITY              | 1.70 | 2.1  | 0 | 0 | 0 | Enhanced |
| 13080 | ATM_DNV1_UP                                                     | 1.71 | 4    | 0 | 0 | 0 | Enhanced |
| 13081 | GO_BLOOD_VESSEL_ENDOTHELIAL_CELL_MIGRATION                      | 1.71 | 4    | 0 | 0 | 0 | Enhanced |
| 13082 | RADAEVA_RESPONSE_TO_IFNA1_DN                                    | 1.71 | 4    | 0 | 0 | 0 | Enhanced |
| 13083 | SATO_SILENCED_BY_METHYLATION_IN_PANCREATIC_CANCER_1             | 1.71 | 4    | 0 | 0 | 0 | Enhanced |
| 13084 | STK33_SKM_UP                                                    | 1.71 | 4    | 0 | 0 | 0 | Enhanced |
| 13085 | STK33_UP                                                        | 1.71 | 4    | 0 | 0 | 0 | Enhanced |
| 13086 | GO_POSITIVE_REGULATION_OF_LYMPHOCYTE_MEDIATED_IMMUNITY          | 1.71 | 2.79 | 0 | 0 | 0 | Enhanced |
| 13087 | GO_INTERLEUKIN_1_PRODUCTION                                     | 1.71 | 2.78 | 0 | 0 | 0 | Enhanced |
| 13088 | LIU_IL13_PRIMING_MODEL                                          | 1.71 | 2.74 | 0 | 0 | 0 | Enhanced |
| 13089 | HERNANDEZ_MITOTIC_ARREST_BY_DOCETAXEL_2_DN                      | 1.71 | 2.44 | 0 | 0 | 0 | Enhanced |
| 13090 | GO_DIPEPTIDASE_ACTIVITY                                         | 1.71 | 2.42 | 0 | 0 | 0 | Enhanced |
| 13091 | TENEDINI_MEGAKARYOCYTE_MARKERS                                  | 1.71 | 2.31 | 0 | 0 | 0 | Enhanced |
| 13092 | ZHENG_FOXP3_TARGETS_IN_T_LYMPHOCYTE_DN                          | 1.71 | 2.3  | 0 | 0 | 0 | Enhanced |
| 13093 | YAO_HOXA10_TARGETS_VIA_PROGESTERONE_UP                          | 1.71 | 2.28 | 0 | 0 | 0 | Enhanced |
| 13094 | DALESSIO_TSA_RESPONSE                                           | 1.71 | 2.27 | 0 | 0 | 0 | Enhanced |
| 13095 | REACTOME_INTERLEUKIN_20_FAMILY_SIGNALING                        | 1.71 | 2.16 | 0 | 0 | 0 | Enhanced |
| 13096 | DORN_ADENOVIRUS_INFECTION_12HR_UP                               | 1.71 | 2.14 | 0 | 0 | 0 | Enhanced |
| 13097 | GO_CELLULAR_RESPONSE_TO_VASCULAR_ENDOTHELIAL_GROWTH_FACTOR_STI  | 1.71 | 2.08 | 0 | 0 | 0 | Enhanced |
| 13098 | GO_ANCHORED_COMPONENT_OF_MEMBRANE                               | 1.72 | 2    | 0 | 0 | 0 | Enhanced |
| 13099 | BERENJENO_TRANSFORMED_BY_RHOA_DN                                | 1.72 | 4    | 0 | 0 | 0 | Enhanced |
| 13100 | GO_HEMIDESMOSOME_ASSEMBLY                                       | 1.72 | 4    | 0 | 0 | 0 | Enhanced |
| 13101 | GO_I_KAPPAB_KINASE_NF_KAPPAB_SIGNALING                          | 1.72 | 4    | 0 | 0 | 0 | Enhanced |
| 13102 | GO_LYMPHOCYTE_ACTIVATION_INVOLVED_IN_IMMUNE_RESPONSE            | 1.72 | 4    | 0 | 0 | 0 | Enhanced |
| 13103 | GO_PASSIVE_TRANSMEMBRANE_TRANSPORTER_ACTIVITY                   | 1.72 | 4    | 0 | 0 | 0 | Enhanced |
| 13104 | GO_REGULATION_OF_ADAPTIVE_IMMUNE_RESPONSE                       | 1.72 | 4    | 0 | 0 | 0 | Enhanced |
| 13105 | HELLER_HDAC_TARGETS_SILENCED_BY_METHYLATION_DN                  | 1.72 | 4    | 0 | 0 | 0 | Enhanced |
| 13106 | KRAS.LUNG_UP.V1_UP                                              | 1.72 | 4    | 0 | 0 | 0 | Enhanced |
| 13107 | LIM_MAMMARY_STEM_CELL_DN                                        | 1.72 | 4    | 0 | 0 | 0 | Enhanced |
| 13108 | LINDGREN_BLADDER_CANCER_CLUSTER_2B                              | 1.72 | 4    | 0 | 0 | 0 | Enhanced |
| 13109 | GO_INTERLEUKIN_1_BETA_PRODUCTION                                | 1.72 | 2.77 | 0 | 0 | 0 | Enhanced |
| 13110 | GO_MANNOSIDASE_ACTIVITY                                         | 1.72 | 2.73 | 0 | 0 | 0 | Enhanced |
| 13111 | ODONNELL_TARGETS_OF_MYC_AND_TFRC_UP                             | 1.72 | 2.5  | 0 | 0 | 0 | Enhanced |
| 13112 | GO_REGULATION_OF_T_CELL_MEDIATED_IMMUNITY                       | 1.72 | 2.49 | 0 | 0 | 0 | Enhanced |
| 13113 | TONKS_TARGETS_OF_RUNX1_RUNX1T1_FUSION_SUSTAINED_IN_ERYTHROCYTE_ | 1.72 | 2.29 | 0 | 0 | 0 | Enhanced |
| 13114 | SPIELMAN_LYMPHOBLAST_EUROPEAN_VS_ASIAN_2FC_DN                   | 1.72 | 2.27 | 0 | 0 | 0 | Enhanced |
| 13115 | FURUKAWA_DUSP6_TARGETS_PCI35_UP                                 | 1.72 | 2.18 | 0 | 0 | 0 | Enhanced |
| 13116 | GILMORE_CORE_NFKB_PATHWAY                                       | 1.72 | 2.15 | 0 | 0 | 0 | Enhanced |
| 13117 | ABBUD_LIF_SIGNALING_1_UP                                        | 1.72 | 2.07 | 0 | 0 | 0 | Enhanced |
| 13118 | SATO_SILENCED_BY_METHYLATION_IN_PANCREATIC_CANCER_2             | 1.72 | 1.85 | 0 | 0 | 0 | Enhanced |
| 13119 | GO_B_CELL_DIFFERENTIATION                                       | 1.73 | 4    | 0 | 0 | 0 | Enhanced |
| 13120 | GO_RESPONSE_TO_BACTERIUM                                        | 1.73 | 4    | 0 | 0 | 0 | Enhanced |
| 13121 | GO_TYPE_2_IMMUNE_RESPONSE                                       | 1.73 | 4    | 0 | 0 | 0 | Enhanced |
| 13122 | ONDER_CDH1_TARGETS_2_DN                                         | 1.73 | 4    | 0 | 0 | 0 | Enhanced |
| 13123 | ESC_V6.5_UP_EARLY.V1_DN                                         | 1.73 | 2.8  | 0 | 0 | 0 | Enhanced |
| 13124 | KEGG_ALLOGRAFT_REJECTION                                        | 1.73 | 2.72 | 0 | 0 | 0 | Enhanced |
| 13125 | IZUKA_LIVER_CANCER_EARLY_RECURRENCE                             | 1.73 | 2.71 | 0 | 0 | 0 | Enhanced |
| 13126 | GO_PHOSPHATE_ION_TRANSPORT                                      | 1.73 | 2.44 | 0 | 0 | 0 | Enhanced |
| 13127 | PEDERSEN_METASTASIS_BY_ERBB2_ISOFORM_4                          | 1.73 | 2.32 | 0 | 0 | 0 | Enhanced |
| 13128 | CORRE_MULTIPLE_MYELOMA_DN                                       | 1.73 | 2.3  | 0 | 0 | 0 | Enhanced |
| 13129 | GO_AMINO_ACID_TRANSMEMBRANE_TRANSPORTER_ACTIVITY                | 1.73 | 2.3  | 0 | 0 | 0 | Enhanced |
| 13130 | GO_AUTOPHAGOSOME_MEMBRANE                                       | 1.73 | 1.88 | 0 | 0 | 0 | Enhanced |
| 13131 | CSR_EARLY_UP.V1_DN                                              | 1.74 | 4    | 0 | 0 | 0 | Enhanced |
| 13132 | JOHNSTONE_PARVB_TARGETS_3_UP                                    | 1.74 | 4    | 0 | 0 | 0 | Enhanced |
| 13133 | PENG_LEUCINE_DEPRIVATION_UP                                     | 1.74 | 4    | 0 | 0 | 0 | Enhanced |
| 13134 | REACTOME_LAMININ_INTERACTIONS                                   | 1.74 | 4    | 0 | 0 | 0 | Enhanced |
| 13135 | GO_NEGATIVE_REGULATION_OF_INTERLEUKIN_8_PRODUCTION              | 1.74 | 2.73 | 0 | 0 | 0 | Enhanced |
| 13136 | GO_LINOLEIC_ACID_METABOLIC_PROCESS                              | 1.74 | 2.7  | 0 | 0 | 0 | Enhanced |
| 13137 | GO_GERMINAL_CENTER_FORMATION                                    | 1.74 | 2.42 | 0 | 0 | 0 | Enhanced |
| 13138 | GO_GOLGI_CISTERNA                                               | 1.74 | 2.34 | 0 | 0 | 0 | Enhanced |
| 13139 | GO_HETEROTYPIC_CELL_CELL_ADHESION                               | 1.74 | 2.3  | 0 | 0 | 0 | Enhanced |
| 13140 | KEGG_HEMATOPOIETIC_CELL_LINEAGE                                 | 1.74 | 2.3  | 0 | 0 | 0 | Enhanced |
| 13141 | ODONNELL_METASTASIS_UP                                          | 1.74 | 2.29 | 0 | 0 | 0 | Enhanced |
| 13142 | GO_TUMOR_NECROSIS_FACTOR_BIOSYNTHETIC_PROCESS                   | 1.74 | 2.23 | 0 | 0 | 0 | Enhanced |
| 13143 | KEGG_GLYCINE_SERINE_AND_THREONINE_METABOLISM                    | 1.74 | 2.16 | 0 | 0 | 0 | Enhanced |
| 13144 | GO_DEFENSE_RESPONSE_TO_GRAM_NEGATIVE_BACTERIUM                  | 1.74 | 2.15 | 0 | 0 | 0 | Enhanced |
| 13145 | CHIARADONNA_NEOPLASTIC_TRANSFORMATION_KRAS_CDC25_DN             | 1.74 | 2.14 | 0 | 0 | 0 | Enhanced |
| 13146 | GO_VACUOLAR_ACIDIFICATION                                       | 1.74 | 1.84 | 0 | 0 | 0 | Enhanced |
| 13147 | CHASSOT_SKIN_WOUND                                              | 1.75 | 4    | 0 | 0 | 0 | Enhanced |
| 13148 | KOBAYASHI_EGFR_SIGNALING_6HR_UP                                 | 1.75 | 4    | 0 | 0 | 0 | Enhanced |
| 13149 | NAKAMURA_TUMOR_ZONE_PERIPHERAL_VS_CENTRAL_DN                    | 1.75 | 4    | 0 | 0 | 0 | Enhanced |
| 13150 | PASINI_SLZ12_TARGETS_UP                                         | 1.75 | 4    | 0 | 0 | 0 | Enhanced |
| 13151 | FERRANDO_T_ALL_WITH_MLL_ENL_FUSION_UP                           | 1.75 | 2.8  | 0 | 0 | 0 | Enhanced |
| 13152 | GO_REGULATION_OF_CHOLESTEROL_BIOSYNTHETIC_PROCESS               | 1.75 | 2.76 | 0 | 0 | 0 | Enhanced |
| 13153 | GO_Glutamate_Receptor_Signaling_Pathway                         | 1.75 | 2.48 | 0 | 0 | 0 | Enhanced |
| 13154 | PID_NFAT_TFPATHWAY                                              | 1.75 | 2.47 | 0 | 0 | 0 | Enhanced |
| 13155 | PID_INTEGRIN_CS_PATHWAY                                         | 1.75 | 2.46 | 0 | 0 | 0 | Enhanced |
| 13156 | GO_SOLUTE_SODIUM_SYMPORTER_ACTIVITY                             | 1.75 | 2.43 | 0 | 0 | 0 | Enhanced |
| 13157 | WIERENGA_STAT5A_TARGETS_GROUP2                                  | 1.75 | 2.3  | 0 | 0 | 0 | Enhanced |
| 13158 | WILENSKY_RESPONSE_TO_DARAPLADIB                                 | 1.75 | 2.29 | 0 | 0 | 0 | Enhanced |
| 13159 | CHR13Q32                                                        | 1.75 | 2.28 | 0 | 0 | 0 | Enhanced |
| 13160 | LINDVALL_IMMORTALIZED_BY_TERT_UP                                | 1.75 | 2.28 | 0 | 0 | 0 | Enhanced |
| 13161 | PLASARI_TGFB1_SIGNALING_VIA_NFIC_10HR_UP                        | 1.75 | 2.26 | 0 | 0 | 0 | Enhanced |
| 13162 | GAUSSMANN_MLL_AF4_FUSION_TARGETS_C_DN                           | 1.76 | 4    | 0 | 0 | 0 | Enhanced |
| 13163 | GO_GAMMA_DELTA_T_CELL_ACTIVATION                                | 1.76 | 4    | 0 | 0 | 0 | Enhanced |
| 13164 | GO_INFLAMMATORY_RESPONSE                                        | 1.76 | 4    | 0 | 0 | 0 | Enhanced |
| 13165 | GO_LYMPHOCYTE_MEDIATED_IMMUNITY                                 | 1.76 | 4    | 0 | 0 | 0 | Enhanced |
| 13166 | KRAS.600.LUNG.BREAST.UP.V1.UP                                   | 1.76 | 4    | 0 | 0 | 0 | Enhanced |
| 13167 | PENG_RAPAMYCIN_RESPONSE_UP                                      | 1.76 | 4    | 0 | 0 | 0 | Enhanced |
| 13168 | RPS14_DNV1_UP                                                   | 1.76 | 4    | 0 | 0 | 0 | Enhanced |
| 13169 | VECCHI_GASTRIC_CANCER_EARLY_DN                                  | 1.76 | 2.83 | 0 | 0 | 0 | Enhanced |
| 13170 | GO_INTERFERON_GAMMA_PRODUCTION                                  | 1.76 | 2.79 | 0 | 0 | 0 | Enhanced |
| 13171 | GO_SYMPORTER_ACTIVITY                                           | 1.76 | 2.77 | 0 | 0 | 0 | Enhanced |
| 13172 | GO_POSITIVE_REGULATION_OF_INTERLEUKIN_8_SECRETION               | 1.76 | 2.72 | 0 | 0 | 0 | Enhanced |
| 13173 | GO_PHOSPHATE_ION_TRANSMEMBRANE_TRANSPORT                        | 1.76 | 2.7  | 0 | 0 | 0 | Enhanced |
| 13174 | TAKEDA_TARGETS_OF_NUP98_HOXA9_FUSION_6HR_UP                     | 1.76 | 2.48 | 0 | 0 | 0 | Enhanced |
| 13175 | DACOSTA_ERCC3_ALLELE_XPCS_VS_TTD_UP                             | 1.76 | 2.43 | 0 | 0 | 0 | Enhanced |
| 13176 | REACTOME_COLLAGEN_FORMATION                                     | 1.76 | 2.31 | 0 | 0 | 0 | Enhanced |
| 13177 | CHIBA_RESPONSE_TO_TSA_UP                                        | 1.76 | 2.17 | 0 | 0 | 0 | Enhanced |

|       |                                                                    |      |      |   |   |   |          |
|-------|--------------------------------------------------------------------|------|------|---|---|---|----------|
| 13178 | CHICAS_RB1_TARGETS_SENESCENT                                       | 1.77 | 4    | 0 | 0 | 0 | Enhanced |
| 13179 | GO_ANION_ANION_ANTIPORTER_ACTIVITY                                 | 1.77 | 4    | 0 | 0 | 0 | Enhanced |
| 13180 | GO_INTRINSIC_COMPONENT_OF_ENDOPLASMIC_RETICULUM_MEMBRANE           | 1.77 | 4    | 0 | 0 | 0 | Enhanced |
| 13181 | GO_MOLECULAR_TRANSDUCER_ACTIVITY                                   | 1.77 | 4    | 0 | 0 | 0 | Enhanced |
| 13182 | GO_NEGATIVE_REGULATION_OF_CYTOKINE_PRODUCTION                      | 1.77 | 4    | 0 | 0 | 0 | Enhanced |
| 13183 | GO_POSITIVE_REGULATION_OF_CELL_KILLING                             | 1.77 | 4    | 0 | 0 | 0 | Enhanced |
| 13184 | GO_RESPONSE_TO_FLUID_SHEAR_STRESS                                  | 1.77 | 4    | 0 | 0 | 0 | Enhanced |
| 13185 | MATTHEWS_AP1_TARGETS                                               | 1.77 | 4    | 0 | 0 | 0 | Enhanced |
| 13186 | ZHU_CMY_8_HR_UP                                                    | 1.77 | 4    | 0 | 0 | 0 | Enhanced |
| 13187 | ZWANG_CLASS_3_TRANSIENTLY_INDUCED_BY_EGF                           | 1.77 | 4    | 0 | 0 | 0 | Enhanced |
| 13188 | E2F1_UP.V1_DN                                                      | 1.77 | 2.82 | 0 | 0 | 0 | Enhanced |
| 13189 | GUO_TARGETS_OF_IRS1_AND_IRS2                                       | 1.77 | 2.8  | 0 | 0 | 0 | Enhanced |
| 13190 | LIEN_BREAST_CARCINOMA_METAPLASTIC_VS_DUCTAL_DN                     | 1.77 | 2.77 | 0 | 0 | 0 | Enhanced |
| 13191 | ONDER_CDH1_SIGNALING_VIA_CTNNB1                                    | 1.77 | 2.77 | 0 | 0 | 0 | Enhanced |
| 13192 | GO_PROTEIN_COMPLEX_INVOLVED_IN_CELL_ADHESION                       | 1.77 | 2.75 | 0 | 0 | 0 | Enhanced |
| 13193 | LEE_LIVER_CANCER_HEPATOBLAST                                       | 1.77 | 2.7  | 0 | 0 | 0 | Enhanced |
| 13194 | RASHI_RESPONSE_TO_IONIZING_RADIATION_1                             | 1.77 | 2.48 | 0 | 0 | 0 | Enhanced |
| 13195 | DAUER_STAT3_TARGETS_UP                                             | 1.77 | 2.47 | 0 | 0 | 0 | Enhanced |
| 13196 | BARRIER_COLON_CANCER_RECURRENCE_DN                                 | 1.77 | 2.45 | 0 | 0 | 0 | Enhanced |
| 13197 | BIOCARTA_IL3_PATHWAY                                               | 1.77 | 2.44 | 0 | 0 | 0 | Enhanced |
| 13198 | KEGG_ABC_TRANSPORTERS                                              | 1.77 | 2.44 | 0 | 0 | 0 | Enhanced |
| 13199 | REACTOME_FOXO_MEDIATED_TRANSCRIPTION_OF_CELL_CYCLE_GENES           | 1.77 | 2.43 | 0 | 0 | 0 | Enhanced |
| 13200 | TSAI_RESPONSE_TO_RADIATION_THERAPY                                 | 1.77 | 2.26 | 0 | 0 | 0 | Enhanced |
| 13201 | BOYLAN_MULTIPLE_MYELOMA_C_D_DN                                     | 1.78 | 4    | 0 | 0 | 0 | Enhanced |
| 13202 | CHR14Q11                                                           | 1.78 | 4    | 0 | 0 | 0 | Enhanced |
| 13203 | GO_G_PROTEIN_COUPLED_RECEPTOR_ACTIVITY                             | 1.78 | 4    | 0 | 0 | 0 | Enhanced |
| 13204 | LINDSTEDT_DENDRITIC_CELL_MATURATION_B                              | 1.78 | 4    | 0 | 0 | 0 | Enhanced |
| 13205 | GARCIA_TARGETS_OF_FL11_AND_DAX1_UP                                 | 1.78 | 2.76 | 0 | 0 | 0 | Enhanced |
| 13206 | AMIT_SERUM_RESPONSE_60_MCF10A                                      | 1.78 | 2.74 | 0 | 0 | 0 | Enhanced |
| 13207 | GO_LUMENAL_SIDE_OF_MEMBRANE                                        | 1.78 | 2.74 | 0 | 0 | 0 | Enhanced |
| 13208 | SOTIRIOU_BREAST_CANCER_GRADE_1_VS_3_DN                             | 1.78 | 2.73 | 0 | 0 | 0 | Enhanced |
| 13209 | GO_CELLULAR_RESPONSE_TO_STEROL                                     | 1.78 | 2.72 | 0 | 0 | 0 | Enhanced |
| 13210 | GO_POSITIVE_REGULATION_OF_ALPHA_BETA_T_CELL_PROLIFERATION          | 1.78 | 2.72 | 0 | 0 | 0 | Enhanced |
| 13211 | GRAHAM_CML_DIVIDING_VS_NORMAL_QUIESCENT_DN                         | 1.78 | 2.5  | 0 | 0 | 0 | Enhanced |
| 13212 | GO_SPROUTING_ANGIOGENESIS                                          | 1.78 | 2.49 | 0 | 0 | 0 | Enhanced |
| 13213 | HOLLERN_MICROACINAR_BREAST_TUMOR_UP                                | 1.78 | 2.46 | 0 | 0 | 0 | Enhanced |
| 13214 | FOURNIER_ACINAR_DEVELOPMENT_EARLY_UP                               | 1.78 | 2.44 | 0 | 0 | 0 | Enhanced |
| 13215 | GO_ACUTE_PHASE_RESPONSE                                            | 1.78 | 2.44 | 0 | 0 | 0 | Enhanced |
| 13216 | GO_L_AMINO_ACID_TRANSMEMBRANE_TRANSPORTER_ACTIVITY                 | 1.78 | 2.3  | 0 | 0 | 0 | Enhanced |
| 13217 | GO_LYMPHOCYTE_DIFFERENTIATION                                      | 1.79 | 4    | 0 | 0 | 0 | Enhanced |
| 13218 | GO_REGULATION_OF_CELL_KILLING                                      | 1.79 | 4    | 0 | 0 | 0 | Enhanced |
| 13219 | GO_REGULATION_OF_CHOLESTEROL_EFFLUX                                | 1.79 | 4    | 0 | 0 | 0 | Enhanced |
| 13220 | KIM_RESPONSE_TO_TSA_AND_DECITABINE_UP                              | 1.79 | 4    | 0 | 0 | 0 | Enhanced |
| 13221 | RAPA_EARLY_UP.V1_UP                                                | 1.79 | 4    | 0 | 0 | 0 | Enhanced |
| 13222 | REACTOME_EXTRACELLULAR_MATRIX_ORGANIZATION                         | 1.79 | 4    | 0 | 0 | 0 | Enhanced |
| 13223 | PDGF_UP.V1_DN                                                      | 1.79 | 2.78 | 0 | 0 | 0 | Enhanced |
| 13224 | VISALA_RESPONSE_TO_HEAT_SHOCK_AND_AGING_UP                         | 1.79 | 2.74 | 0 | 0 | 0 | Enhanced |
| 13225 | GO_NEGATIVE_REGULATION_OF_CYTOKINE_BIOSYNTHETIC_PROCESS            | 1.79 | 2.73 | 0 | 0 | 0 | Enhanced |
| 13226 | GO_NEUTRAL_AMINO_ACID_TRANSMEMBRANE_TRANSPORTER_ACTIVITY           | 1.79 | 2.73 | 0 | 0 | 0 | Enhanced |
| 13227 | GO_REGULATION_OF_Glutamate_Receptor_Signaling_Pathway              | 1.79 | 2.45 | 0 | 0 | 0 | Enhanced |
| 13228 | GENTLES_LEUKEMIC_STEM_CELL_UP                                      | 1.79 | 2.27 | 0 | 0 | 0 | Enhanced |
| 13229 | GENTILE_UV_HIGH_DOSE_UP                                            | 1.80 | 4    | 0 | 0 | 0 | Enhanced |
| 13230 | GO_ENDOTHELIAL_CELL_CHEMOTAXIS                                     | 1.80 | 4    | 0 | 0 | 0 | Enhanced |
| 13231 | HUANG_GATA2_TARGETS_UP                                             | 1.80 | 4    | 0 | 0 | 0 | Enhanced |
| 13232 | KEGG_AUTOIMMUNE_THYROID_DISEASE                                    | 1.80 | 4    | 0 | 0 | 0 | Enhanced |
| 13233 | PID_AP1_PATHWAY                                                    | 1.80 | 4    | 0 | 0 | 0 | Enhanced |
| 13234 | GO_SECONDARY_ALCOHOL_METABOLIC_PROCESS                             | 1.80 | 2.78 | 0 | 0 | 0 | Enhanced |
| 13235 | GO_REGULATION_OF_NEUROTRANSMITTER_RECEPTOR_ACTIVITY                | 1.80 | 2.75 | 0 | 0 | 0 | Enhanced |
| 13236 | GO_POSITIVE_REGULATION_OF_CYTOSOLIC_CALCIIUM_ION_CONCENTRATION_INV | 1.80 | 2.71 | 0 | 0 | 0 | Enhanced |
| 13237 | CHIARADONNA_NEOPLASTIC_TRANSFORMATION_KRAS_DN                      | 1.80 | 2.51 | 0 | 0 | 0 | Enhanced |
| 13238 | KEGG_INTESTINAL_IMMUNE_NETWORK_FOR_IGA_PRODUCTION                  | 1.80 | 2.28 | 0 | 0 | 0 | Enhanced |
| 13239 | GEORGANTAS_HSC_MARKERS                                             | 1.81 | 4    | 0 | 0 | 0 | Enhanced |
| 13240 | GO_ENDOTHELIAL_CELL_APOPTOTIC_PROCESS                              | 1.81 | 4    | 0 | 0 | 0 | Enhanced |
| 13241 | GO_LYSOSOMAL_LUMEN                                                 | 1.81 | 4    | 0 | 0 | 0 | Enhanced |
| 13242 | GO_REGULATION_OF_ALCOHOL_BIOSYNTHETIC_PROCESS                      | 1.81 | 4    | 0 | 0 | 0 | Enhanced |
| 13243 | GO_SECONDARY_ACTIVE_TRANSMEMBRANE_TRANSPORTER_ACTIVITY             | 1.81 | 4    | 0 | 0 | 0 | Enhanced |
| 13244 | LIU_PROSTATE_CANCER_UP                                             | 1.81 | 4    | 0 | 0 | 0 | Enhanced |
| 13245 | MISSIAGLIA_REGULATED_BY_METHYLATION_UP                             | 1.81 | 4    | 0 | 0 | 0 | Enhanced |
| 13246 | PEDERSEN_METASTASIS_BY_ERBB2_ISOFORM_5                             | 1.81 | 4    | 0 | 0 | 0 | Enhanced |
| 13247 | SABATES_COLORECTAL_ADENOMA_DN                                      | 1.81 | 4    | 0 | 0 | 0 | Enhanced |
| 13248 | VERNELL_RETINOBLASTOMA_PATHWAY_UP                                  | 1.81 | 4    | 0 | 0 | 0 | Enhanced |
| 13249 | WHITFIELD_CELL_CYCLE_S                                             | 1.81 | 4    | 0 | 0 | 0 | Enhanced |
| 13250 | LEE_AGING_NEOCORTEX_UP                                             | 1.81 | 2.79 | 0 | 0 | 0 | Enhanced |
| 13251 | GO_POSITIVE_REGULATION_OF_INTERFERON_GAMMA_PRODUCTION              | 1.81 | 2.76 | 0 | 0 | 0 | Enhanced |
| 13252 | GO_CELL_SURFACE                                                    | 1.82 | 4    | 0 | 0 | 0 | Enhanced |
| 13253 | GO_STEROL_METABOLIC_PROCESS                                        | 1.82 | 4    | 0 | 0 | 0 | Enhanced |
| 13254 | GO_T_HELPER_1_TYPE_IMMUNE_RESPONSE                                 | 1.82 | 4    | 0 | 0 | 0 | Enhanced |
| 13255 | KOBAYASHI_RESPONSE_TO_ROMIDEPSIN                                   | 1.82 | 4    | 0 | 0 | 0 | Enhanced |
| 13256 | MEISSNER_NPC_HCP_WITH_H3_UNMETHYLATED                              | 1.82 | 4    | 0 | 0 | 0 | Enhanced |
| 13257 | MISHRA_CARCINOMA_ASSOCIATED_FIBROBLAST_UP                          | 1.82 | 4    | 0 | 0 | 0 | Enhanced |
| 13258 | PID_REG_GR_PATHWAY                                                 | 1.82 | 4    | 0 | 0 | 0 | Enhanced |
| 13259 | SHIPP_DLBCI_VS_FOLLICULAR_LYMPHOMA_DN                              | 1.82 | 4    | 0 | 0 | 0 | Enhanced |
| 13260 | ZHANG_RESPONSE_TO_IKK_INHIBITOR_AND_TNF_UP                         | 1.82 | 4    | 0 | 0 | 0 | Enhanced |
| 13261 | VALK_AML_CLUSTER_11                                                | 1.82 | 2.74 | 0 | 0 | 0 | Enhanced |
| 13262 | REACTOME_AMINO_ACID_TRANSPORT_ACROSS_THE_PLASMA_MEMBRANE           | 1.82 | 2.44 | 0 | 0 | 0 | Enhanced |
| 13263 | GO_NEGATIVE_REGULATION_OF_TUMOR_NECROSIS_FACTOR_SUPERFAMILY_CYT    | 1.82 | 2.16 | 0 | 0 | 0 | Enhanced |
| 13264 | GO_ANTIGEN_BINDING                                                 | 1.82 | 2.09 | 0 | 0 | 0 | Enhanced |
| 13265 | GO_ALPHA_BETA_T_CELL_ACTIVATION                                    | 1.83 | 4    | 0 | 0 | 0 | Enhanced |
| 13266 | GO_CD4_POSITIVE_ALPHA_BETA_T_CELL_ACTIVATION                       | 1.83 | 4    | 0 | 0 | 0 | Enhanced |
| 13267 | GO_T_CELL_DIFFERENTIATION                                          | 1.83 | 4    | 0 | 0 | 0 | Enhanced |
| 13268 | HOFFMANN_LARGE_TO_SMALL_PRE_BII_LYMPHOCYTE_DN                      | 1.83 | 4    | 0 | 0 | 0 | Enhanced |
| 13269 | RIZ_ERYTHROID_DIFFERENTIATION_12HR                                 | 1.83 | 4    | 0 | 0 | 0 | Enhanced |
| 13270 | GO_CHOLESTEROL_EFFLUX                                              | 1.83 | 2.74 | 0 | 0 | 0 | Enhanced |
| 13271 | WENG_POR_TARGETS_LIVER_UP                                          | 1.83 | 2.74 | 0 | 0 | 0 | Enhanced |
| 13272 | CASORELLI_APL_SECONDARY_VS_DE_NOVO_UP                              | 1.83 | 2.46 | 0 | 0 | 0 | Enhanced |
| 13273 | KHETCHOUMIAN_TRIM24_TARGETS_UP                                     | 1.83 | 2.28 | 0 | 0 | 0 | Enhanced |
| 13274 | CHANG_IMMORTALIZED_BY_HPV31_DN                                     | 1.84 | 4    | 0 | 0 | 0 | Enhanced |
| 13275 | GO_ALPHA_BETA_T_CELL_DIFFERENTIATION                               | 1.84 | 4    | 0 | 0 | 0 | Enhanced |
| 13276 | KEGG_LYSOSOME                                                      | 1.84 | 4    | 0 | 0 | 0 | Enhanced |
| 13277 | KRAS.600.LUNG.BREAST_UP.V1_DN                                      | 1.84 | 4    | 0 | 0 | 0 | Enhanced |
| 13278 | PHONG_TNF_TARGETS_UP                                               | 1.84 | 4    | 0 | 0 | 0 | Enhanced |
| 13279 | PID_INTEGRIN1_PATHWAY                                              | 1.84 | 4    | 0 | 0 | 0 | Enhanced |
| 13280 | SHIN_B_CELL_LYMPHOMA_CLUSTER_5                                     | 1.84 | 4    | 0 | 0 | 0 | Enhanced |
| 13281 | ZWANG_EGF_PERSISTENTLY_DN                                          | 1.84 | 4    | 0 | 0 | 0 | Enhanced |
| 13282 | NIKOLSKY_BREAST_CANCER_16P13_AMPLICON                              | 1.84 | 2.8  | 0 | 0 | 0 | Enhanced |
| 13283 | CHOW_RA5SF1_TARGETS_DN                                             | 1.84 | 2.76 | 0 | 0 | 0 | Enhanced |
| 13284 | GO_NEGATIVE_REGULATION_OF_RECEPTOR_SIGNALING_PATHWAY_VIA_STAT      | 1.84 | 2.74 | 0 | 0 | 0 | Enhanced |
| 13285 | GO_INTERLEUKIN_8_SECRETION                                         | 1.84 | 2.72 | 0 | 0 | 0 | Enhanced |
| 13286 | ERBB2_UP.V1_UP                                                     | 1.85 | 4    | 0 | 0 | 0 | Enhanced |

|       |                                                                  |      |      |   |   |   |          |
|-------|------------------------------------------------------------------|------|------|---|---|---|----------|
| 13287 | GO_ALCOHOL_BIOSYNTHETIC_PROCESS                                  | 1.85 | 4    | 0 | 0 | 0 | Enhanced |
| 13288 | GO_INTERFERON_GAMMA_SECRETION                                    | 1.85 | 4    | 0 | 0 | 0 | Enhanced |
| 13289 | GO_INTERLEUKIN_8_PRODUCTION                                      | 1.85 | 4    | 0 | 0 | 0 | Enhanced |
| 13290 | GO_NEGATIVE_REGULATION_OF_INTERLEUKIN_2_PRODUCTION               | 1.85 | 4    | 0 | 0 | 0 | Enhanced |
| 13291 | ALK_DN.V1_UP                                                     | 1.86 | 4    | 0 | 0 | 0 | Enhanced |
| 13292 | BRCA1_DN.V1_UP                                                   | 1.86 | 4    | 0 | 0 | 0 | Enhanced |
| 13293 | GAJATE_RESPONSE_TO TRABECTEDIN_UP                                | 1.86 | 4    | 0 | 0 | 0 | Enhanced |
| 13294 | GO_HUMORAL_IMMUNE_RESPONSE                                       | 1.86 | 4    | 0 | 0 | 0 | Enhanced |
| 13295 | MOLENAAR_TARGETS_OF_CCND1_AND_CDK4_UP                            | 1.86 | 4    | 0 | 0 | 0 | Enhanced |
| 13296 | REACTOME_INTEGRIN_CELL_SURFACE_INTERACTIONS                      | 1.86 | 4    | 0 | 0 | 0 | Enhanced |
| 13297 | SEKI_INFLAMMATORY_RESPONSE_LPS_UP                                | 1.86 | 4    | 0 | 0 | 0 | Enhanced |
| 13298 | WHITFIELD_CELL_CYCLE_G1_S                                        | 1.86 | 4    | 0 | 0 | 0 | Enhanced |
| 13299 | BURTON_ADIPOGENESIS_10                                           | 1.87 | 4    | 0 | 0 | 0 | Enhanced |
| 13300 | GO_INTRINSIC_COMPONENT_OF_PLASMA_MEMBRANE                        | 1.87 | 4    | 0 | 0 | 0 | Enhanced |
| 13301 | GO_ORGANIC_HYDROXY_COMPOUND_BIOSYNTHETIC_PROCESS                 | 1.87 | 4    | 0 | 0 | 0 | Enhanced |
| 13302 | GO_T_CELL_ACTIVATION_INVOLVED_IN_IMMUNE_RESPONSE                 | 1.87 | 4    | 0 | 0 | 0 | Enhanced |
| 13303 | HALLMARK_KRAS_SIGNALING_DN                                       | 1.87 | 4    | 0 | 0 | 0 | Enhanced |
| 13304 | LE_EGR2_TARGETS_DN                                               | 1.87 | 4    | 0 | 0 | 0 | Enhanced |
| 13305 | ONDER_CDHI_TARGETS_1_UP                                          | 1.87 | 4    | 0 | 0 | 0 | Enhanced |
| 13306 | REACTOME_IMMUNOREGULATORY_INTERACTIONS_BETWEEN_A_LYMPHOID_AND_F  | 1.87 | 4    | 0 | 0 | 0 | Enhanced |
| 13307 | SMID_BREAST_CANCER_NORMAL_LIKE_UP                                | 1.87 | 4    | 0 | 0 | 0 | Enhanced |
| 13308 | GO_INTERLEUKIN_7_MEDIATED_SIGNALING_PATHWAY                      | 1.87 | 2.74 | 0 | 0 | 0 | Enhanced |
| 13309 | GO_TRANSMEMBRANE_SIGNALING_RECEPTOR_ACTIVITY                     | 1.88 | 4    | 0 | 0 | 0 | Enhanced |
| 13310 | HORTON_SREBF_TARGETS                                             | 1.88 | 4    | 0 | 0 | 0 | Enhanced |
| 13311 | WINTER_HYPOXIA_DN                                                | 1.88 | 2.78 | 0 | 0 | 0 | Enhanced |
| 13312 | UZONYI_RESPONSE_TO_LEUKOTRIENE_AND_THROMBIN                      | 1.88 | 2.76 | 0 | 0 | 0 | Enhanced |
| 13313 | AMIT_SERUM_RESPONSE_40_MCF10A                                    | 1.89 | 4    | 0 | 0 | 0 | Enhanced |
| 13314 | FARMER_BREAST_CANCER_CLUSTER_1                                   | 1.89 | 4    | 0 | 0 | 0 | Enhanced |
| 13315 | GO_ADAPTIVE_IMMUNE_RESPONSE_BASED_ON_SOMATIC_RECOMBINATION_OF_IM | 1.89 | 4    | 0 | 0 | 0 | Enhanced |
| 13316 | GO_POSITIVE_REGULATION_OF_CYTOKINE_BIOSYNTHETIC_PROCESS          | 1.89 | 4    | 0 | 0 | 0 | Enhanced |
| 13317 | GO_REGULATION_OF_STEROID_BIOSYNTHETIC_PROCESS                    | 1.89 | 4    | 0 | 0 | 0 | Enhanced |
| 13318 | GO_SOLUTE_CATION_SYMPORTER_ACTIVITY                              | 1.89 | 4    | 0 | 0 | 0 | Enhanced |
| 13319 | ALTEMEIER_RESPONSE_TO_LPS_WITH_MECHANICAL_VENTILATION            | 1.90 | 4    | 0 | 0 | 0 | Enhanced |
| 13320 | GO_ADAPTIVE_IMMUNE_RESPONSE                                      | 1.90 | 4    | 0 | 0 | 0 | Enhanced |
| 13321 | GO_ANION_TRANSMEMBRANE_TRANSPORT                                 | 1.90 | 4    | 0 | 0 | 0 | Enhanced |
| 13322 | GO_STEROID_METABOLIC_PROCESS                                     | 1.90 | 4    | 0 | 0 | 0 | Enhanced |
| 13323 | VERHAAK_AML_WITH_NPM1_MUTATED_DN                                 | 1.90 | 4    | 0 | 0 | 0 | Enhanced |
| 13324 | WANG_RESPONSE_TO_GSK3_INHIBITOR_SB216763_UP                      | 1.90 | 4    | 0 | 0 | 0 | Enhanced |
| 13325 | ZHAN_MULTIPLE_MYELOMA_CD1_UP                                     | 1.90 | 2.77 | 0 | 0 | 0 | Enhanced |
| 13326 | TIAN_TNF_SIGNALING_NOT_VIA_NFKB                                  | 1.90 | 2.71 | 0 | 0 | 0 | Enhanced |
| 13327 | E2F3_UP.V1_UP                                                    | 1.91 | 4    | 0 | 0 | 0 | Enhanced |
| 13328 | GO_DEFENSE_RESPONSE_TO_BACTERIUM                                 | 1.91 | 4    | 0 | 0 | 0 | Enhanced |
| 13329 | GO_T_CELL_DIFFERENTIATION_INVOLVED_IN_IMMUNE_RESPONSE            | 1.91 | 4    | 0 | 0 | 0 | Enhanced |
| 13330 | GO_T_CELL_MEDIATED_IMMUNITY                                      | 1.91 | 4    | 0 | 0 | 0 | Enhanced |
| 13331 | LEE_AGING_CEREBELLUM_UP                                          | 1.91 | 4    | 0 | 0 | 0 | Enhanced |
| 13332 | REACTOME_TRANSPORT_OF_INORGANIC_CATIONS_ANIONS_AND_AMINO_ACIDS_O | 1.91 | 4    | 0 | 0 | 0 | Enhanced |
| 13333 | CRX_DN.V1_DN                                                     | 1.92 | 4    | 0 | 0 | 0 | Enhanced |
| 13334 | GO_CHLORIDE_CHANNEL_ACTIVITY                                     | 1.92 | 4    | 0 | 0 | 0 | Enhanced |
| 13335 | JECHLINGER_EPITHELIAL_TO_MESENCHYMAL_TRANSITION_DN               | 1.92 | 4    | 0 | 0 | 0 | Enhanced |
| 13336 | KRAS_LUNG_BREAST_UP.V1_DN                                        | 1.92 | 4    | 0 | 0 | 0 | Enhanced |
| 13337 | MARZEC_IL2_SIGNALING_DN                                          | 1.92 | 4    | 0 | 0 | 0 | Enhanced |
| 13338 | WENG_POR_TARGETS_GLOBAL_UP                                       | 1.92 | 4    | 0 | 0 | 0 | Enhanced |
| 13339 | GO_ANION_CHANNEL_ACTIVITY                                        | 1.92 | 2.77 | 0 | 0 | 0 | Enhanced |
| 13340 | P53_DN.V2_UP                                                     | 1.92 | 2.76 | 0 | 0 | 0 | Enhanced |
| 13341 | BHATI_G2M_ARREST_BY_2METHOXYESTRADIOL_DN                         | 1.93 | 4    | 0 | 0 | 0 | Enhanced |
| 13342 | BOYALTI_LIVER_CANCER_SUBCLASS_G5_DN                              | 1.93 | 4    | 0 | 0 | 0 | Enhanced |
| 13343 | GO_STEROID_BIOSYNTHETIC_PROCESS                                  | 1.93 | 4    | 0 | 0 | 0 | Enhanced |
| 13344 | GO_STEROL_BIOSYNTHETIC_PROCESS                                   | 1.93 | 4    | 0 | 0 | 0 | Enhanced |
| 13345 | KEGG_STEROID_BIOSYNTHESIS                                        | 1.93 | 4    | 0 | 0 | 0 | Enhanced |
| 13346 | KINSEY_TARGETS_OF_EWSR1_FLII_FUSION_DN                           | 1.93 | 4    | 0 | 0 | 0 | Enhanced |
| 13347 | YAO_TEMPORAL_RESPONSE_TO_PROGESTERONE_CLUSTER_0                  | 1.93 | 2.77 | 0 | 0 | 0 | Enhanced |
| 13348 | BROWNE_HCMV_INFECTION_2HR_UP                                     | 1.94 | 4    | 0 | 0 | 0 | Enhanced |
| 13349 | GO_ANION_TRANSMEMBRANE_TRANSPORTER_ACTIVITY                      | 1.94 | 4    | 0 | 0 | 0 | Enhanced |
| 13350 | GO_REGULATION_OF_STEROID_METABOLIC_PROCESS                       | 1.94 | 4    | 0 | 0 | 0 | Enhanced |
| 13351 | KOBAYASHI_EGFR_SIGNALING_24HR_UP                                 | 1.94 | 4    | 0 | 0 | 0 | Enhanced |
| 13352 | LEE_BMP2_TARGETS_UP                                              | 1.94 | 4    | 0 | 0 | 0 | Enhanced |
| 13353 | WALLACE_PROSTATE_CANCER_RACE_UP                                  | 1.94 | 4    | 0 | 0 | 0 | Enhanced |
| 13354 | GO_CHLORIDE_TRANSMEMBRANE_TRANSPORT                              | 1.95 | 4    | 0 | 0 | 0 | Enhanced |
| 13355 | HIRSCH_CELLULAR_TRANSFORMATION_SIGNATURE_UP                      | 1.95 | 4    | 0 | 0 | 0 | Enhanced |
| 13356 | SMID_BREAST_CANCER_LUMINAL_B_DN                                  | 1.95 | 4    | 0 | 0 | 0 | Enhanced |
| 13357 | GO_CYTOKINE_METABOLIC_PROCESS                                    | 1.96 | 4    | 0 | 0 | 0 | Enhanced |
| 13358 | GO_INTERLEUKIN_10_PRODUCTION                                     | 1.97 | 4    | 0 | 0 | 0 | Enhanced |
| 13359 | MCDOWELL_ACUTE_LUNG_INJURY_UP                                    | 1.97 | 4    | 0 | 0 | 0 | Enhanced |
| 13360 | RUIZ_TNC_TARGETS_UP                                              | 1.97 | 4    | 0 | 0 | 0 | Enhanced |
| 13361 | BURTON_ADIPOGENESIS_PEAK_AT_2HR                                  | 1.98 | 4    | 0 | 0 | 0 | Enhanced |
| 13362 | DIRMEIER_LMP1_RESPONSE_EARLY                                     | 1.98 | 4    | 0 | 0 | 0 | Enhanced |
| 13363 | SARRIO_EPITHELIAL_MESENCHYMAL_TRANSITION_DN                      | 1.98 | 4    | 0 | 0 | 0 | Enhanced |
| 13364 | ZHAN_MULTIPLE_MYELOMA_CD1_VS_CD2_UP                              | 1.98 | 4    | 0 | 0 | 0 | Enhanced |
| 13365 | GO_CHLORIDE_TRANSPORT                                            | 1.98 | 2.76 | 0 | 0 | 0 | Enhanced |
| 13366 | CHANDRAN_METASTASIS_TOP50_DN                                     | 1.99 | 4    | 0 | 0 | 0 | Enhanced |
| 13367 | GO_ANTIBACTERIAL_HUMORAL_RESPONSE                                | 1.99 | 4    | 0 | 0 | 0 | Enhanced |
| 13368 | HALLMARK_TNFA_SIGNALING_VIA_NFKB                                 | 1.99 | 4    | 0 | 0 | 0 | Enhanced |
| 13369 | MCLACHLAN_DENTAL_CARIES_UP                                       | 1.99 | 4    | 0 | 0 | 0 | Enhanced |
| 13370 | ABE_VEGFA_TARGETS_30MIN                                          | 2.00 | 4    | 0 | 0 | 0 | Enhanced |
| 13371 | GO_EXTERNAL_SIDE_OF_PLASMA_MEMBRANE                              | 2.00 | 4    | 0 | 0 | 0 | Enhanced |
| 13372 | PODAR_RESPONSE_TO_ADAPHOSTIN_UP                                  | 2.01 | 4    | 0 | 0 | 0 | Enhanced |
| 13373 | GO_CHLORIDE_TRANSMEMBRANE_TRANSPORTER_ACTIVITY                   | 2.02 | 4    | 0 | 0 | 0 | Enhanced |
| 13374 | GO_INORGANIC_ANION_TRANSPORT                                     | 2.02 | 4    | 0 | 0 | 0 | Enhanced |
| 13375 | GO_POSITIVE_REGULATION_OF_INTERLEUKIN_10_PRODUCTION              | 2.02 | 4    | 0 | 0 | 0 | Enhanced |
| 13376 | KRIGE_RESPONSE_TO_TOSEDOSTAT_24HR_UP                             | 2.02 | 4    | 0 | 0 | 0 | Enhanced |
| 13377 | TONKS_TARGETS_OF_RUNX1_RUNX1T1_FUSION_HSC_UP                     | 2.03 | 4    | 0 | 0 | 0 | Enhanced |
| 13378 | FISCHER_G1_S_CELL_CYCLE                                          | 2.04 | 4    | 0 | 0 | 0 | Enhanced |
| 13379 | KEGG_CELL_ADHESION_MOLECULES_CAMS                                | 2.05 | 4    | 0 | 0 | 0 | Enhanced |
| 13380 | IL2_UP.V1_DN                                                     | 2.06 | 4    | 0 | 0 | 0 | Enhanced |
| 13381 | JECHLINGER_EPITHELIAL_TO_MESENCHYMAL_TRANSITION_UP               | 2.06 | 4    | 0 | 0 | 0 | Enhanced |
| 13382 | GO_INORGANIC_ANION_TRANSMEMBRANE_TRANSPORT                       | 2.07 | 4    | 0 | 0 | 0 | Enhanced |
| 13383 | JI_RESPONSE_TO_FSH_UP                                            | 2.07 | 4    | 0 | 0 | 0 | Enhanced |
| 13384 | MTOR_UP.N4.V1_DN                                                 | 2.07 | 4    | 0 | 0 | 0 | Enhanced |
| 13385 | HUANG_FOXA2_TARGETS_UP                                           | 2.08 | 4    | 0 | 0 | 0 | Enhanced |
| 13386 | KRIGE_AMINO_ACID_DEPRIVATION                                     | 2.08 | 4    | 0 | 0 | 0 | Enhanced |
| 13387 | CHANG_CORE_SERUM_RESPONSE_DN                                     | 2.09 | 4    | 0 | 0 | 0 | Enhanced |
| 13388 | IL15_UP.V1_DN                                                    | 2.09 | 4    | 0 | 0 | 0 | Enhanced |
| 13389 | REACTOME_CHOLESTEROL_BIOSYNTHESIS                                | 2.09 | 4    | 0 | 0 | 0 | Enhanced |
| 13390 | AMIT_EGF_RESPONSE_40_HELA                                        | 2.12 | 4    | 0 | 0 | 0 | Enhanced |
| 13391 | GO_INORGANIC_ANION_TRANSMEMBRANE_TRANSPORTER_ACTIVITY            | 2.12 | 4    | 0 | 0 | 0 | Enhanced |
| 13392 | SCHMIDT_POR_TARGETS_IN_LIMB_BUD_UP                               | 2.12 | 4    | 0 | 0 | 0 | Enhanced |
| 13393 | GARY_CD5_TARGETS_UP                                              | 2.14 | 4    | 0 | 0 | 0 | Enhanced |
| 13394 | TARTE_PLASMA_CELL_VS_PLASMABLAST_UP                              | 2.14 | 4    | 0 | 0 | 0 | Enhanced |
| 13395 | GO_ANTIMICROBIAL_HUMORAL_RESPONSE                                | 2.15 | 4    | 0 | 0 | 0 | Enhanced |

|                                        |      |   |   |   |   |          |
|----------------------------------------|------|---|---|---|---|----------|
| 13396 CSR_LATE_UP.V1_DN                | 2.19 | 4 | 0 | 0 | 0 | Enhanced |
| 13397 HALLMARK_CHOLESTEROL_HOMEOSTASIS | 2.19 | 4 | 0 | 0 | 0 | Enhanced |

---



**Supplementary Table 7C:** Gene expression changes induced by RZ-2994 vs. DMSO at Day 3 on KOPTK1 cells.

Significance estimated based on DESeq2 (apeglm shrunken fold change) padj < 0.10. Effect of RZ-2994 on gene expression: decreased if log2FoldChange < -1.5, increased if log2FoldChange > 1.5. Base mean is the average DESeq2 normalized reads in DMSO replicates. Expressed genes have at least 10 reads in at least three replicate samples. Shown are the expressed genes at Day 3 ranked by RZ-2994 vs. DMSO log2FoldChange expression.

| #  | Gene symbol (hg19) | log2FoldChange RZ-2994 vs. DMSO Day3 DESeq2 apeglm | pvalue RZ-2994 vs. DMSO Day3 DESeq2 | padj RZ-2994 vs. DMSO Day3 DESeq2 | baseMean RZ-2994 vs. DMSO Day3 DESeq2 | RZ-2994 effect on gene expression at Day 3 |
|----|--------------------|----------------------------------------------------|-------------------------------------|-----------------------------------|---------------------------------------|--------------------------------------------|
| 1  | DEFA6              | -4.63                                              | 4.43E-05                            | 1.35E-04                          | 11.35                                 | Decreased                                  |
| 2  | CCR5               | -4.49                                              | 5.61E-07                            | 2.19E-06                          | 17.95                                 | Decreased                                  |
| 3  | ELK3               | -4.01                                              | 7.78E-06                            | 2.62E-05                          | 16.29                                 | Decreased                                  |
| 4  | USH1C              | -3.78                                              | 5.28E-04                            | 1.33E-03                          | 8.45                                  | Decreased                                  |
| 5  | TMPRSS13           | -3.74                                              | 4.93E-05                            | 1.48E-04                          | 13.04                                 | Decreased                                  |
| 6  | ABCC8              | -3.53                                              | 1.27E-09                            | 6.63E-09                          | 36.37                                 | Decreased                                  |
| 7  | STRA6              | -3.36                                              | 2.83E-19                            | 3.46E-18                          | 87.54                                 | Decreased                                  |
| 8  | MTSS1              | -3.33                                              | 2.75E-20                            | 3.57E-19                          | 91.97                                 | Decreased                                  |
| 9  | GBP5               | -3.31                                              | 1.81E-49                            | 1.10E-47                          | 260.44                                | Decreased                                  |
| 10 | CXCR3              | -3.17                                              | 1.90E-03                            | 4.30E-03                          | 7.30                                  | Decreased                                  |
| 11 | MYT1               | -3.11                                              | 1.68E-05                            | 5.42E-05                          | 18.30                                 | Decreased                                  |
| 12 | MKLN1-AS           | -3.01                                              | 4.12E-09                            | 2.05E-08                          | 41.28                                 | Decreased                                  |
| 13 | ANXA1              | -3.00                                              | 6.33E-33                            | 1.86E-31                          | 189.57                                | Decreased                                  |
| 14 | H19                | -2.85                                              | 3.55E-34                            | 1.14E-32                          | 214.95                                | Decreased                                  |
| 15 | METTL7A            | -2.75                                              | 6.84E-22                            | 9.85E-21                          | 154.42                                | Decreased                                  |
| 16 | IRF8               | -2.75                                              | 5.69E-10                            | 3.10E-09                          | 52.61                                 | Decreased                                  |
| 17 | ASS1               | -2.61                                              | 2.19E-14                            | 1.79E-13                          | 106.55                                | Decreased                                  |
| 18 | COL5A2             | -2.60                                              | 1.50E-07                            | 6.29E-07                          | 199.90                                | Decreased                                  |
| 19 | IFIT1              | -2.59                                              | 1.78E-13                            | 1.34E-12                          | 84.39                                 | Decreased                                  |
| 20 | PTMS               | -2.56                                              | 1.74E-86                            | 3.27E-84                          | 755.58                                | Decreased                                  |
| 21 | PFKFB4             | -2.55                                              | 8.08E-25                            | 1.41E-23                          | 188.15                                | Decreased                                  |
| 22 | CLEC12A            | -2.53                                              | 3.25E-11                            | 2.00E-10                          | 74.51                                 | Decreased                                  |
| 23 | PAPSS2             | -2.52                                              | 3.28E-13                            | 2.41E-12                          | 91.55                                 | Decreased                                  |
| 24 | RNF43              | -2.44                                              | 2.04E-04                            | 5.56E-04                          | 19.29                                 | Decreased                                  |
| 25 | KCNJ11             | -2.39                                              | 4.60E-109                           | 1.56E-106                         | 1206.59                               | Decreased                                  |
| 26 | APOBEC3H           | -2.38                                              | 1.52E-16                            | 1.49E-15                          | 130.65                                | Decreased                                  |
| 27 | NDUFA4L2           | -2.33                                              | 4.43E-04                            | 1.13E-03                          | 17.63                                 | Decreased                                  |
| 28 | CD4                | -2.30                                              | 2.23E-09                            | 1.14E-08                          | 82.35                                 | Decreased                                  |
| 29 | ANXA2              | -2.25                                              | 1.35E-26                            | 2.65E-25                          | 265.14                                | Decreased                                  |
| 30 | PTPN3              | -2.25                                              | 8.14E-48                            | 4.65E-46                          | 493.88                                | Decreased                                  |
| 31 | CCR2               | -2.24                                              | 1.76E-03                            | 4.03E-03                          | 12.96                                 | Decreased                                  |
| 32 | LOC101927482       | -2.23                                              | 7.99E-17                            | 8.02E-16                          | 173.01                                | Decreased                                  |
| 33 | TLR9               | -2.23                                              | 2.11E-29                            | 4.94E-28                          | 297.69                                | Decreased                                  |
| 34 | ACSL6              | -2.22                                              | 4.21E-09                            | 2.09E-08                          | 69.41                                 | Decreased                                  |
| 35 | CDC20              | -2.21                                              | 3.10E-229                           | 9.48E-226                         | 5647.42                               | Decreased                                  |
| 36 | BMP10              | -2.20                                              | 4.74E-06                            | 1.65E-05                          | 38.94                                 | Decreased                                  |
| 37 | TRAF3IP2           | -2.19                                              | 8.92E-24                            | 1.47E-22                          | 244.76                                | Decreased                                  |
| 38 | TBKBP1             | -2.18                                              | 1.71E-07                            | 7.09E-07                          | 57.21                                 | Decreased                                  |
| 39 | IFFO2              | -2.18                                              | 2.01E-10                            | 1.15E-09                          | 91.80                                 | Decreased                                  |
| 40 | HIST1H2BH          | -2.18                                              | 1.82E-10                            | 1.05E-09                          | 88.95                                 | Decreased                                  |
| 41 | HMMR               | -2.17                                              | 1.09E-192                           | 1.67E-189                         | 3572.61                               | Decreased                                  |
| 42 | ZNF385A            | -2.17                                              | 1.08E-08                            | 5.16E-08                          | 85.82                                 | Decreased                                  |
| 43 | GPR114             | -2.16                                              | 7.20E-06                            | 2.44E-05                          | 40.23                                 | Decreased                                  |
| 44 | SPR                | -2.14                                              | 6.05E-05                            | 1.80E-04                          | 31.78                                 | Decreased                                  |
| 45 | RASSF4             | -2.13                                              | 1.52E-21                            | 2.14E-20                          | 233.29                                | Decreased                                  |
| 46 | DHRS2              | -2.12                                              | 4.30E-04                            | 1.10E-03                          | 24.00                                 | Decreased                                  |
| 47 | TREML2             | -2.12                                              | 4.45E-52                            | 3.00E-50                          | 727.89                                | Decreased                                  |
| 48 | SLC35F3            | -2.11                                              | 1.17E-15                            | 1.07E-14                          | 164.69                                | Decreased                                  |
| 49 | HMGNS              | -2.10                                              | 1.23E-62                            | 1.18E-60                          | 880.03                                | Decreased                                  |
| 50 | RHBDF2             | -2.10                                              | 3.67E-11                            | 2.25E-10                          | 108.21                                | Decreased                                  |
| 51 | PDE9A              | -2.08                                              | 1.43E-13                            | 1.08E-12                          | 145.24                                | Decreased                                  |
| 52 | KCNH3              | -2.08                                              | 3.38E-03                            | 7.34E-03                          | 11.92                                 | Decreased                                  |
| 53 | GPC3               | -2.07                                              | 1.94E-06                            | 7.08E-06                          | 55.80                                 | Decreased                                  |
| 54 | THEMIS2            | -2.07                                              | 3.98E-04                            | 1.03E-03                          | 23.57                                 | Decreased                                  |
| 55 | NINJ2              | -2.05                                              | 2.73E-08                            | 1.25E-07                          | 74.48                                 | Decreased                                  |
| 56 | PPFIA4             | -2.04                                              | 1.00E-10                            | 5.89E-10                          | 120.27                                | Decreased                                  |
| 57 | EHD3               | -2.04                                              | 4.17E-10                            | 2.31E-09                          | 100.25                                | Decreased                                  |
| 58 | HSD3B7             | -2.04                                              | 7.10E-05                            | 2.09E-04                          | 32.85                                 | Decreased                                  |
| 59 | ROPN1L             | -2.00                                              | 6.69E-04                            | 1.65E-03                          | 22.67                                 | Decreased                                  |
| 60 | RTN4RL2            | -2.00                                              | 2.98E-06                            | 1.06E-05                          | 60.01                                 | Decreased                                  |
| 61 | TUBA4A             | -1.99                                              | 4.67E-13                            | 3.39E-12                          | 148.84                                | Decreased                                  |
| 62 | KCTD21             | -1.98                                              | 9.52E-19                            | 1.12E-17                          | 252.18                                | Decreased                                  |
| 63 | DOK2               | -1.97                                              | 5.16E-04                            | 1.30E-03                          | 26.13                                 | Decreased                                  |
| 64 | PIF1               | -1.97                                              | 8.89E-31                            | 2.25E-29                          | 486.76                                | Decreased                                  |
| 65 | ANGPTL2            | -1.97                                              | 6.99E-09                            | 3.41E-08                          | 94.80                                 | Decreased                                  |
| 66 | SH3PXD2B           | -1.97                                              | 2.75E-05                            | 8.59E-05                          | 49.47                                 | Decreased                                  |
| 67 | ANXA3              | -1.96                                              | 1.01E-05                            | 3.36E-05                          | 54.19                                 | Decreased                                  |
| 68 | SLC14A2            | -1.95                                              | 1.18E-04                            | 3.33E-04                          | 34.61                                 | Decreased                                  |
| 69 | PLAC8              | -1.94                                              | 1.58E-25                            | 2.91E-24                          | 377.44                                | Decreased                                  |
| 70 | RASGRP3            | -1.94                                              | 1.71E-13                            | 1.29E-12                          | 172.99                                | Decreased                                  |
| 71 | TMEM229B           | -1.94                                              | 7.76E-38                            | 3.14E-36                          | 650.69                                | Decreased                                  |
| 72 | RTN4IP1            | -1.93                                              | 2.22E-14                            | 1.81E-13                          | 208.70                                | Decreased                                  |
| 73 | FBLN5              | -1.93                                              | 8.65E-18                            | 9.41E-17                          | 260.15                                | Decreased                                  |
| 74 | WASF1              | -1.92                                              | 1.84E-80                            | 2.96E-78                          | 1581.94                               | Decreased                                  |
| 75 | IL2RB              | -1.91                                              | 5.65E-51                            | 3.67E-49                          | 1074.83                               | Decreased                                  |
| 76 | PSTPIP2            | -1.91                                              | 4.00E-27                            | 8.11E-26                          | 440.56                                | Decreased                                  |

|     |             |       |           |           |          |           |
|-----|-------------|-------|-----------|-----------|----------|-----------|
| 77  | PLK1        | -1.91 | 4.02E-156 | 3.50E-153 | 5164.08  | Decreased |
| 78  | MIR22HG     | -1.90 | 1.79E-03  | 4.07E-03  | 20.63    | Decreased |
| 79  | PLXNA4      | -1.89 | 5.04E-04  | 1.28E-03  | 31.57    | Decreased |
| 80  | HIST1H3C    | -1.89 | 3.59E-04  | 9.33E-04  | 32.06    | Decreased |
| 81  | CTSG        | -1.88 | 6.89E-08  | 2.99E-07  | 89.51    | Decreased |
| 82  | LFNG        | -1.88 | 1.74E-06  | 6.40E-06  | 74.49    | Decreased |
| 83  | TNNT1       | -1.88 | 5.74E-07  | 2.23E-06  | 80.34    | Decreased |
| 84  | SUSD2       | -1.88 | 5.46E-03  | 1.13E-02  | 12.36    | Decreased |
| 85  | CD27        | -1.88 | 8.47E-09  | 4.10E-08  | 106.34   | Decreased |
| 86  | ID2         | -1.87 | 9.43E-04  | 2.27E-03  | 25.73    | Decreased |
| 87  | TLR7        | -1.87 | 4.17E-03  | 8.88E-03  | 14.86    | Decreased |
| 88  | NEIL2       | -1.85 | 1.86E-33  | 5.65E-32  | 574.96   | Decreased |
| 89  | KLF9        | -1.85 | 5.03E-04  | 1.27E-03  | 33.55    | Decreased |
| 90  | WNK4        | -1.84 | 2.61E-07  | 1.06E-06  | 92.64    | Decreased |
| 91  | IL18R1      | -1.84 | 5.27E-06  | 1.81E-05  | 65.02    | Decreased |
| 92  | KLHL13      | -1.84 | 2.21E-11  | 1.38E-10  | 164.78   | Decreased |
| 93  | TM6SF1      | -1.84 | 3.35E-07  | 1.35E-06  | 83.58    | Decreased |
| 94  | CST7        | -1.83 | 1.87E-07  | 7.74E-07  | 91.66    | Decreased |
| 95  | NR6A1       | -1.83 | 8.67E-05  | 2.52E-04  | 46.63    | Decreased |
| 96  | CHCHD10     | -1.81 | 6.48E-30  | 1.56E-28  | 565.98   | Decreased |
| 97  | IL10RA      | -1.81 | 6.98E-04  | 1.72E-03  | 29.88    | Decreased |
| 98  | RARG        | -1.81 | 2.18E-07  | 8.94E-07  | 103.33   | Decreased |
| 99  | TOR4A       | -1.81 | 1.98E-03  | 4.47E-03  | 22.23    | Decreased |
| 100 | GABARAPL1   | -1.81 | 1.12E-13  | 8.56E-13  | 210.46   | Decreased |
| 101 | OAS1        | -1.80 | 5.15E-11  | 3.11E-10  | 164.03   | Decreased |
| 102 | PKIG        | -1.80 | 3.87E-07  | 1.54E-06  | 91.11    | Decreased |
| 103 | ALDOC       | -1.79 | 3.24E-36  | 1.18E-34  | 735.11   | Decreased |
| 104 | EPHX4       | -1.79 | 2.59E-07  | 1.06E-06  | 96.41    | Decreased |
| 105 | KPNA2       | -1.78 | 2.18E-138 | 1.56E-135 | 5359.10  | Decreased |
| 106 | TPMT        | -1.78 | 1.50E-27  | 3.14E-26  | 566.91   | Decreased |
| 107 | C6orf52     | -1.78 | 3.23E-04  | 8.46E-04  | 38.98    | Decreased |
| 108 | CDKN1A      | -1.77 | 2.66E-20  | 3.46E-19  | 369.80   | Decreased |
| 109 | SH3BP5      | -1.77 | 5.52E-10  | 3.02E-09  | 164.37   | Decreased |
| 110 | DOK4        | -1.77 | 5.15E-11  | 3.11E-10  | 186.93   | Decreased |
| 111 | NR1H3       | -1.77 | 6.02E-10  | 3.27E-09  | 157.45   | Decreased |
| 112 | LINC00263   | -1.77 | 7.07E-15  | 6.07E-14  | 268.03   | Decreased |
| 113 | ENPEP       | -1.76 | 2.28E-41  | 1.06E-39  | 1355.07  | Decreased |
| 114 | MICAL2      | -1.75 | 1.48E-13  | 1.13E-12  | 232.89   | Decreased |
| 115 | KIAA0513    | -1.75 | 1.01E-04  | 2.91E-04  | 52.83    | Decreased |
| 116 | ARHGAP5-AS1 | -1.75 | 5.93E-03  | 1.22E-02  | 15.13    | Decreased |
| 117 | PTPRU       | -1.74 | 1.58E-30  | 3.92E-29  | 675.82   | Decreased |
| 118 | FAM64A      | -1.74 | 1.13E-34  | 3.71E-33  | 1039.70  | Decreased |
| 119 | UBE2S       | -1.73 | 7.12E-74  | 9.26E-72  | 5186.02  | Decreased |
| 120 | TFEB        | -1.73 | 6.39E-14  | 5.02E-13  | 270.47   | Decreased |
| 121 | CPNE2       | -1.72 | 3.56E-16  | 3.38E-15  | 306.27   | Decreased |
| 122 | CYTH3       | -1.72 | 4.91E-08  | 2.18E-07  | 122.37   | Decreased |
| 123 | HIST1H2AH   | -1.72 | 3.76E-03  | 8.10E-03  | 21.01    | Decreased |
| 124 | AXIN2       | -1.72 | 2.78E-07  | 1.13E-06  | 117.73   | Decreased |
| 125 | PPFIBP1     | -1.72 | 2.13E-39  | 9.14E-38  | 976.70   | Decreased |
| 126 | FBLN2       | -1.72 | 1.24E-13  | 9.48E-13  | 263.21   | Decreased |
| 127 | LDHA        | -1.71 | 1.94E-128 | 1.13E-125 | 35219.09 | Decreased |
| 128 | UBTD1       | -1.71 | 3.20E-03  | 6.96E-03  | 22.95    | Decreased |
| 129 | SMTN        | -1.71 | 7.49E-29  | 1.69E-27  | 707.56   | Decreased |
| 130 | HSPA5       | -1.71 | 1.15E-133 | 7.40E-131 | 7932.55  | Decreased |
| 131 | GARS        | -1.71 | 5.83E-125 | 2.96E-122 | 7937.44  | Decreased |
| 132 | SFXN3       | -1.70 | 7.62E-05  | 2.23E-04  | 57.63    | Decreased |
| 133 | RDH10       | -1.70 | 5.21E-56  | 4.13E-54  | 1650.61  | Decreased |
| 134 | LINC01132   | -1.70 | 2.17E-13  | 1.63E-12  | 255.06   | Decreased |
| 135 | RAP1GAP2    | -1.70 | 1.15E-03  | 2.72E-03  | 34.83    | Decreased |
| 136 | FAM72B      | -1.69 | 1.77E-11  | 1.11E-10  | 219.32   | Decreased |
| 137 | DARS2       | -1.69 | 2.40E-69  | 2.79E-67  | 2083.42  | Decreased |
| 138 | HDHD1       | -1.69 | 1.11E-39  | 4.83E-38  | 1036.10  | Decreased |
| 139 | EGR1        | -1.69 | 1.11E-73  | 1.41E-71  | 2407.65  | Decreased |
| 140 | SSR4P1      | -1.69 | 5.25E-05  | 1.57E-04  | 66.95    | Decreased |
| 141 | DGUOK-AS1   | -1.68 | 3.68E-04  | 9.55E-04  | 47.33    | Decreased |
| 142 | BCL9L       | -1.68 | 1.17E-28  | 2.59E-27  | 679.54   | Decreased |
| 143 | ZDHHC11     | -1.68 | 3.79E-05  | 1.16E-04  | 67.87    | Decreased |
| 144 | CREB3L1     | -1.68 | 1.01E-04  | 2.91E-04  | 59.52    | Decreased |
| 145 | C4orf32     | -1.68 | 2.23E-07  | 9.12E-07  | 136.93   | Decreased |
| 146 | MYL4        | -1.67 | 8.02E-03  | 1.61E-02  | 14.30    | Decreased |
| 147 | GEMIN8P4    | -1.67 | 3.37E-05  | 1.04E-04  | 78.33    | Decreased |
| 148 | SCD         | -1.67 | 1.08E-129 | 6.58E-127 | 39556.57 | Decreased |
| 149 | EFNA1       | -1.67 | 1.31E-04  | 3.68E-04  | 66.54    | Decreased |
| 150 | LOC728084   | -1.67 | 6.55E-55  | 4.97E-53  | 2054.60  | Decreased |
| 151 | TUBB4B      | -1.67 | 2.83E-109 | 1.02E-106 | 6577.42  | Decreased |
| 152 | IFI30       | -1.66 | 8.79E-23  | 1.34E-21  | 539.72   | Decreased |
| 153 | SH3BGR      | -1.66 | 1.58E-06  | 5.84E-06  | 104.48   | Decreased |
| 154 | DAB1        | -1.66 | 5.86E-04  | 1.46E-03  | 43.22    | Decreased |
| 155 | EBNA1BP2    | -1.66 | 4.90E-49  | 2.95E-47  | 2825.73  | Decreased |
| 156 | CBWD1       | -1.66 | 8.94E-16  | 8.21E-15  | 361.32   | Decreased |
| 157 | TFRC        | -1.66 | 8.07E-168 | 1.10E-164 | 28882.49 | Decreased |
| 158 | FAH         | -1.66 | 2.70E-26  | 5.17E-25  | 713.08   | Decreased |
| 159 | PHPT1       | -1.65 | 6.83E-25  | 1.21E-23  | 712.00   | Decreased |
| 160 | ICAM4       | -1.65 | 1.46E-04  | 4.08E-04  | 61.46    | Decreased |
| 161 | FARSB       | -1.65 | 1.77E-77  | 2.48E-75  | 2767.05  | Decreased |
| 162 | MAP1A       | -1.65 | 1.03E-19  | 1.29E-18  | 4232.10  | Decreased |
| 163 | ARHGAP18    | -1.64 | 1.55E-20  | 2.04E-19  | 520.83   | Decreased |
| 164 | SLC50A1     | -1.64 | 1.89E-30  | 4.67E-29  | 932.74   | Decreased |

|     |             |       |           |           |          |           |
|-----|-------------|-------|-----------|-----------|----------|-----------|
| 165 | PGK1        | -1.64 | 6.44E-104 | 1.87E-101 | 12665.70 | Decreased |
| 166 | PRF1        | -1.63 | 4.64E-08  | 2.07E-07  | 166.51   | Decreased |
| 167 | GREB1       | -1.63 | 4.74E-11  | 2.88E-10  | 269.62   | Decreased |
| 168 | ATP6V1E2    | -1.63 | 3.48E-09  | 1.75E-08  | 188.61   | Decreased |
| 169 | DHRS4L2     | -1.62 | 5.66E-26  | 1.06E-24  | 757.45   | Decreased |
| 170 | RRAS        | -1.62 | 8.78E-06  | 2.94E-05  | 98.20    | Decreased |
| 171 | PLCD3       | -1.62 | 3.14E-09  | 1.59E-08  | 205.19   | Decreased |
| 172 | SH3BGR13    | -1.62 | 7.69E-73  | 9.59E-71  | 4557.55  | Decreased |
| 173 | ZBED5-AS1   | -1.62 | 2.48E-06  | 8.93E-06  | 113.99   | Decreased |
| 174 | CEP112      | -1.61 | 3.35E-13  | 2.46E-12  | 316.31   | Decreased |
| 175 | KATNAL2     | -1.61 | 2.15E-06  | 7.82E-06  | 116.17   | Decreased |
| 176 | PKM         | -1.61 | 1.23E-137 | 8.36E-135 | 14069.68 | Decreased |
| 177 | CCNB1       | -1.61 | 1.02E-108 | 3.37E-106 | 5771.94  | Decreased |
| 178 | PTTG1       | -1.61 | 4.08E-66  | 4.19E-64  | 2969.87  | Decreased |
| 179 | SLC7A11     | -1.61 | 3.04E-14  | 2.46E-13  | 413.57   | Decreased |
| 180 | RYR2        | -1.61 | 3.81E-05  | 1.17E-04  | 83.98    | Decreased |
| 181 | LYAR        | -1.61 | 6.74E-58  | 5.53E-56  | 2335.05  | Decreased |
| 182 | KBTBD8      | -1.61 | 5.50E-17  | 5.62E-16  | 435.27   | Decreased |
| 183 | MRPL24      | -1.61 | 9.27E-28  | 1.97E-26  | 888.31   | Decreased |
| 184 | CCR7        | -1.60 | 4.46E-10  | 2.46E-09  | 237.16   | Decreased |
| 185 | KLF10       | -1.60 | 2.34E-22  | 3.47E-21  | 712.80   | Decreased |
| 186 | ARHGEF11    | -1.60 | 2.75E-05  | 8.59E-05  | 90.89    | Decreased |
| 187 | RGS9        | -1.60 | 6.79E-08  | 2.96E-07  | 169.48   | Decreased |
| 188 | SPEF1       | -1.60 | 1.12E-02  | 2.19E-02  | 12.04    | Decreased |
| 189 | FAM86C2P    | -1.60 | 2.08E-05  | 6.61E-05  | 90.95    | Decreased |
| 190 | ADORA3      | -1.59 | 4.47E-03  | 9.48E-03  | 27.77    | Decreased |
| 191 | LIMA1       | -1.59 | 1.51E-31  | 3.99E-30  | 1069.94  | Decreased |
| 192 | ADM2        | -1.59 | 1.31E-09  | 6.83E-09  | 241.96   | Decreased |
| 193 | IQCK        | -1.59 | 2.69E-04  | 7.16E-04  | 62.28    | Decreased |
| 194 | CBR4        | -1.59 | 6.32E-27  | 1.27E-25  | 860.09   | Decreased |
| 195 | MARS        | -1.59 | 3.11E-107 | 9.99E-105 | 7043.72  | Decreased |
| 196 | GPRIN3      | -1.59 | 1.17E-11  | 7.51E-11  | 320.47   | Decreased |
| 197 | STAT4       | -1.59 | 6.61E-25  | 1.17E-23  | 847.34   | Decreased |
| 198 | CNN2        | -1.59 | 3.56E-76  | 4.89E-74  | 3854.05  | Decreased |
| 199 | PLBD2       | -1.58 | 1.09E-08  | 5.19E-08  | 207.11   | Decreased |
| 200 | CCDC107     | -1.58 | 5.22E-08  | 2.31E-07  | 200.07   | Decreased |
| 201 | DAB2IP      | -1.58 | 2.18E-03  | 4.89E-03  | 39.53    | Decreased |
| 202 | CCT5        | -1.58 | 1.81E-78  | 2.73E-76  | 14785.46 | Decreased |
| 203 | 43526_22646 | -1.58 | 2.15E-06  | 7.80E-06  | 126.25   | Decreased |
| 204 | MRM1        | -1.58 | 1.19E-03  | 2.82E-03  | 51.85    | Decreased |
| 205 | ATP5EP2     | -1.57 | 1.74E-04  | 4.81E-04  | 73.50    | Decreased |
| 206 | HSP90B1     | -1.57 | 1.32E-96  | 3.05E-94  | 21377.88 | Decreased |
| 207 | PLXNC1      | -1.57 | 1.38E-04  | 3.86E-04  | 74.35    | Decreased |
| 208 | DLGAP5      | -1.57 | 3.65E-60  | 3.21E-58  | 4978.12  | Decreased |
| 209 | CREM        | -1.57 | 4.53E-22  | 6.60E-21  | 660.85   | Decreased |
| 210 | SGSH        | -1.57 | 5.74E-03  | 1.19E-02  | 28.22    | Decreased |
| 211 | CKS2        | -1.57 | 2.49E-57  | 2.03E-55  | 3313.35  | Decreased |
| 212 | RHOU        | -1.57 | 3.86E-27  | 7.84E-26  | 880.30   | Decreased |
| 213 | THSD1       | -1.57 | 4.69E-03  | 9.91E-03  | 29.87    | Decreased |
| 214 | DLEU1       | -1.57 | 3.65E-19  | 4.42E-18  | 677.92   | Decreased |
| 215 | PINX1       | -1.57 | 2.55E-22  | 3.76E-21  | 806.55   | Decreased |
| 216 | ETFB        | -1.57 | 1.11E-24  | 1.93E-23  | 1298.26  | Decreased |
| 217 | MUC4        | -1.57 | 4.26E-05  | 1.30E-04  | 113.44   | Decreased |
| 218 | NKG7        | -1.57 | 4.20E-17  | 4.31E-16  | 652.97   | Decreased |
| 219 | CFH         | -1.57 | 1.69E-14  | 1.39E-13  | 429.82   | Decreased |
| 220 | EIF5AL1     | -1.57 | 1.37E-05  | 4.46E-05  | 107.91   | Decreased |
| 221 | CENPE       | -1.56 | 8.02E-74  | 1.03E-71  | 5369.87  | Decreased |
| 222 | ANKRD6      | -1.56 | 9.59E-03  | 1.89E-02  | 17.10    | Decreased |
| 223 | HES1        | -1.56 | 1.53E-06  | 5.68E-06  | 142.26   | Decreased |
| 224 | RARA        | -1.56 | 1.75E-24  | 3.00E-23  | 857.05   | Decreased |
| 225 | PTGDR2      | -1.56 | 1.40E-05  | 4.55E-05  | 123.37   | Decreased |
| 226 | PPAP2B      | -1.56 | 8.94E-05  | 2.59E-04  | 86.87    | Decreased |
| 227 | CDKN3       | -1.56 | 1.13E-40  | 5.09E-39  | 1542.45  | Decreased |
| 228 | GPR126      | -1.55 | 6.12E-03  | 1.26E-02  | 28.95    | Decreased |
| 229 | TMPRSS3     | -1.55 | 1.08E-04  | 3.06E-04  | 93.22    | Decreased |
| 230 | SSH3        | -1.55 | 1.65E-04  | 4.56E-04  | 78.44    | Decreased |
| 231 | STIP1       | -1.55 | 6.42E-110 | 2.38E-107 | 12157.97 | Decreased |
| 232 | RETN        | -1.55 | 4.10E-06  | 1.43E-05  | 137.18   | Decreased |
| 233 | TNFSF4      | -1.55 | 1.51E-07  | 6.34E-07  | 194.83   | Decreased |
| 234 | CCDC86      | -1.55 | 5.34E-49  | 3.18E-47  | 2177.12  | Decreased |
| 235 | PSAT1       | -1.55 | 4.62E-76  | 6.28E-74  | 4456.23  | Decreased |
| 236 | TMEM71      | -1.55 | 6.95E-10  | 3.74E-09  | 278.63   | Decreased |
| 237 | EIF4EBP1    | -1.55 | 1.80E-43  | 8.82E-42  | 1939.03  | Decreased |
| 238 | RAET1E      | -1.55 | 1.42E-03  | 3.30E-03  | 46.92    | Decreased |
| 239 | DLEU2       | -1.55 | 2.05E-21  | 2.88E-20  | 694.65   | Decreased |
| 240 | EDARADD     | -1.55 | 1.46E-10  | 8.41E-10  | 333.21   | Decreased |
| 241 | CORO1C      | -1.55 | 4.98E-82  | 8.33E-80  | 5132.48  | Decreased |
| 242 | CHAC1       | -1.55 | 9.75E-05  | 2.81E-04  | 85.93    | Decreased |
| 243 | ATP6V0E2    | -1.55 | 3.05E-19  | 3.70E-18  | 651.62   | Decreased |
| 244 | STX11       | -1.54 | 7.57E-04  | 1.85E-03  | 58.11    | Decreased |
| 245 | COX20       | -1.54 | 3.49E-26  | 6.63E-25  | 992.39   | Decreased |
| 246 | BAG3        | -1.54 | 2.04E-25  | 3.72E-24  | 858.35   | Decreased |
| 247 | HLF         | -1.54 | 2.02E-03  | 4.56E-03  | 42.52    | Decreased |
| 248 | FN3K        | -1.54 | 5.72E-03  | 1.18E-02  | 29.24    | Decreased |
| 249 | MLKL        | -1.54 | 1.51E-18  | 1.75E-17  | 607.77   | Decreased |
| 250 | LUCAT1      | -1.54 | 1.93E-03  | 4.36E-03  | 45.58    | Decreased |
| 251 | FAM98A      | -1.53 | 1.59E-35  | 5.52E-34  | 1635.95  | Decreased |
| 252 | COX17       | -1.53 | 1.03E-23  | 1.69E-22  | 981.80   | Decreased |

|     |              |       |          |          |         |                 |
|-----|--------------|-------|----------|----------|---------|-----------------|
| 253 | BHLHE40      | -1.53 | 2.05E-17 | 2.16E-16 | 580.41  | Decreased       |
| 254 | WDR18        | -1.53 | 3.27E-37 | 1.26E-35 | 1507.15 | Decreased       |
| 255 | DUSP6        | -1.53 | 3.06E-89 | 6.12E-87 | 6969.10 | Decreased       |
| 256 | LOC101927045 | -1.53 | 3.22E-04 | 8.46E-04 | 76.55   | Decreased       |
| 257 | NME1         | -1.53 | 1.19E-32 | 3.43E-31 | 1368.11 | Decreased       |
| 258 | NDUFB8       | -1.53 | 1.44E-54 | 1.06E-52 | 4299.50 | Decreased       |
| 259 | ALPK1        | -1.53 | 1.18E-09 | 6.18E-09 | 290.12  | Decreased       |
| 260 | PACGSIN3     | -1.53 | 2.25E-06 | 8.16E-06 | 159.40  | Decreased       |
| 261 | MRPL13       | -1.53 | 5.05E-43 | 2.44E-41 | 2019.50 | Decreased       |
| 262 | SPNS3        | -1.53 | 1.74E-21 | 2.45E-20 | 801.64  | Decreased       |
| 263 | TAMM41       | -1.53 | 8.56E-08 | 3.68E-07 | 210.46  | Decreased       |
| 264 | COQ3         | -1.53 | 2.71E-13 | 2.01E-12 | 403.67  | Decreased       |
| 265 | CCNB2        | -1.53 | 2.63E-61 | 2.35E-59 | 3283.86 | Decreased       |
| 266 | DANCR        | -1.53 | 2.88E-40 | 1.28E-38 | 1821.07 | Decreased       |
| 267 | AIF1         | -1.53 | 1.34E-34 | 4.41E-33 | 1867.43 | Decreased       |
| 268 | AAK1         | -1.52 | 4.68E-29 | 1.07E-27 | 1687.37 | Decreased       |
| 269 | SRP14-AS1    | -1.52 | 3.58E-03 | 7.73E-03 | 40.27   | Decreased       |
| 270 | CD79B        | -1.52 | 1.85E-13 | 1.39E-12 | 420.09  | Decreased       |
| 271 | CDK2AP2      | -1.52 | 9.76E-46 | 5.23E-44 | 4029.04 | Decreased       |
| 272 | CEP19        | -1.52 | 1.03E-14 | 8.69E-14 | 456.28  | Decreased       |
| 273 | BST1         | -1.52 | 1.56E-04 | 4.34E-04 | 84.77   | Decreased       |
| 274 | WT1          | -1.52 | 2.88E-19 | 3.51E-18 | 701.91  | Decreased       |
| 275 | RNASE6       | -1.52 | 2.09E-03 | 4.71E-03 | 45.18   | Decreased       |
| 276 | IKBKE        | -1.52 | 8.04E-11 | 4.76E-10 | 367.54  | Decreased       |
| 277 | GPAM         | -1.52 | 2.35E-31 | 6.17E-30 | 1227.66 | Decreased       |
| 278 | DHRS4        | -1.52 | 4.09E-17 | 4.21E-16 | 654.35  | Decreased       |
| 279 | PAK1IP1      | -1.52 | 8.79E-31 | 2.23E-29 | 1362.33 | Decreased       |
| 280 | SLC25A23     | -1.52 | 6.15E-32 | 1.67E-30 | 1310.86 | Decreased       |
| 281 | ABCG1        | -1.52 | 1.89E-12 | 1.30E-11 | 408.38  | Decreased       |
| 282 | S100A10      | -1.52 | 2.27E-13 | 1.69E-12 | 532.49  | Decreased       |
| 283 | TUBA1C       | -1.51 | 1.40E-68 | 1.57E-66 | 6158.95 | Decreased       |
| 284 | FAM86A       | -1.51 | 4.35E-08 | 1.94E-07 | 242.57  | Decreased       |
| 285 | MORN2        | -1.51 | 1.28E-03 | 3.00E-03 | 57.03   | Decreased       |
| 286 | XBP1         | -1.51 | 1.31E-39 | 5.63E-38 | 2334.72 | Decreased       |
| 287 | LGALS1       | -1.51 | 3.21E-07 | 1.29E-06 | 205.16  | Decreased       |
| 288 | FRMD4B       | -1.51 | 1.88E-04 | 5.16E-04 | 88.06   | Decreased       |
| 289 | CTSH         | -1.51 | 1.67E-20 | 2.20E-19 | 952.18  | Decreased       |
| 290 | FAM83F       | -1.51 | 1.08E-04 | 3.08E-04 | 95.32   | Decreased       |
| 291 | ARPC5L       | -1.51 | 2.65E-27 | 5.45E-26 | 1581.10 | Decreased       |
| 292 | NDRG2        | -1.51 | 6.64E-03 | 1.36E-02 | 28.70   | Decreased       |
| 293 | SREBF1       | -1.51 | 1.72E-62 | 1.60E-60 | 6205.87 | Decreased       |
| 294 | EHD4         | -1.51 | 7.26E-11 | 4.32E-10 | 334.21  | Decreased       |
| 295 | RRAS2        | -1.51 | 2.87E-14 | 2.32E-13 | 510.86  | Decreased       |
| 296 | KLRG1        | -1.51 | 3.52E-04 | 9.17E-04 | 78.04   | Decreased       |
| 297 | HCST         | -1.51 | 1.07E-08 | 5.10E-08 | 271.50  | Decreased       |
| 298 | DDIT4        | -1.50 | 1.71E-16 | 1.66E-15 | 721.05  | Decreased       |
| 299 | SERPINF1     | -1.50 | 3.62E-10 | 2.01E-09 | 325.96  | Decreased       |
| 300 | AURKA        | -1.50 | 5.53E-50 | 3.48E-48 | 2793.06 | Decreased       |
| 301 | PLS1         | -1.50 | 3.28E-30 | 8.04E-29 | 1281.06 | Decreased       |
| 302 | S100Z        | -1.50 | 4.87E-04 | 1.24E-03 | 75.31   | Decreased       |
| 303 | PAPLN        | -1.50 | 5.84E-04 | 1.46E-03 | 85.65   | Decreased       |
| 304 | LTV1         | -1.50 | 1.85E-38 | 7.62E-37 | 1847.73 | Decreased       |
| 305 | RPF2         | -1.50 | 3.30E-34 | 1.06E-32 | 1566.52 | Decreased       |
| 306 | SEPN1        | -1.50 | 8.38E-04 | 2.03E-03 | 71.02   | not significant |
| 307 | NCR3LG1      | -1.50 | 5.11E-19 | 6.08E-18 | 704.09  | not significant |
| 308 | ASUN         | -1.49 | 5.68E-44 | 2.89E-42 | 2677.44 | not significant |
| 309 | PIK3AP1      | -1.49 | 2.32E-05 | 7.31E-05 | 138.85  | not significant |
| 310 | SIRPG        | -1.49 | 4.22E-05 | 1.29E-04 | 115.54  | not significant |
| 311 | FAM171A1     | -1.49 | 2.64E-05 | 8.27E-05 | 129.46  | not significant |
| 312 | DUSP3        | -1.49 | 4.93E-15 | 4.28E-14 | 569.13  | not significant |
| 313 | CD8B         | -1.49 | 1.12E-03 | 2.66E-03 | 62.17   | not significant |
| 314 | CERCAM       | -1.49 | 9.33E-03 | 1.84E-02 | 25.46   | not significant |
| 315 | SIGLEC12     | -1.49 | 5.84E-08 | 2.57E-07 | 236.70  | not significant |
| 316 | CDCA2        | -1.49 | 1.29E-49 | 7.91E-48 | 2844.69 | not significant |
| 317 | CHORDC1      | -1.49 | 6.27E-51 | 4.05E-49 | 2716.75 | not significant |
| 318 | GPATCH4      | -1.49 | 8.13E-23 | 1.24E-21 | 1654.30 | not significant |
| 319 | ITGA2        | -1.49 | 3.00E-08 | 1.37E-07 | 288.27  | not significant |
| 320 | PACGSIN1     | -1.49 | 1.26E-09 | 6.60E-09 | 327.19  | not significant |
| 321 | SESN2        | -1.49 | 3.79E-12 | 2.54E-11 | 413.30  | not significant |
| 322 | C3orf18      | -1.49 | 1.71E-17 | 1.81E-16 | 655.49  | not significant |
| 323 | CD52         | -1.48 | 9.76E-20 | 1.23E-18 | 908.94  | not significant |
| 324 | FLNB         | -1.48 | 2.52E-10 | 1.43E-09 | 3461.10 | not significant |
| 325 | ELOVL6       | -1.48 | 1.50E-16 | 1.48E-15 | 713.61  | not significant |
| 326 | RARS         | -1.48 | 1.92E-38 | 7.85E-37 | 2017.01 | not significant |
| 327 | FOCAD        | -1.48 | 1.47E-27 | 3.06E-26 | 1219.72 | not significant |
| 328 | RIMS3        | -1.48 | 1.02E-32 | 2.95E-31 | 1810.70 | not significant |
| 329 | IARS         | -1.48 | 5.24E-62 | 4.82E-60 | 6372.41 | not significant |
| 330 | PRDX1        | -1.48 | 3.61E-39 | 1.52E-37 | 9672.36 | not significant |
| 331 | HIST1H2BC    | -1.48 | 5.26E-03 | 1.10E-02 | 40.19   | not significant |
| 332 | LINC01061    | -1.48 | 1.50E-05 | 4.86E-05 | 145.81  | not significant |
| 333 | PPIL1        | -1.48 | 9.66E-31 | 2.43E-29 | 1923.03 | not significant |
| 334 | LOC90784     | -1.48 | 4.09E-09 | 2.04E-08 | 358.29  | not significant |
| 335 | RIMBP2       | -1.48 | 3.95E-04 | 1.02E-03 | 81.58   | not significant |
| 336 | AUH          | -1.48 | 9.80E-07 | 3.71E-06 | 195.32  | not significant |
| 337 | KRT10        | -1.48 | 1.06E-18 | 1.24E-17 | 913.46  | not significant |
| 338 | CPT2         | -1.48 | 6.48E-15 | 5.58E-14 | 723.96  | not significant |
| 339 | PCED1B       | -1.47 | 1.11E-04 | 3.16E-04 | 112.17  | not significant |
| 340 | SNRPG        | -1.47 | 2.53E-35 | 8.60E-34 | 2060.18 | not significant |

|     |             |       |          |          |           |                 |
|-----|-------------|-------|----------|----------|-----------|-----------------|
| 341 | PPP1R14B    | -1.47 | 3.44E-34 | 1.10E-32 | 2214.37   | not significant |
| 342 | GGACT       | -1.47 | 4.29E-03 | 9.13E-03 | 42.21     | not significant |
| 343 | CHAC2       | -1.47 | 1.47E-15 | 1.33E-14 | 598.97    | not significant |
| 344 | CDCA3       | -1.47 | 3.96E-11 | 2.42E-10 | 442.20    | not significant |
| 345 | ST3GAL4-AS1 | -1.47 | 8.94E-06 | 2.99E-05 | 161.75    | not significant |
| 346 | ITGB1BP1    | -1.47 | 7.27E-34 | 2.30E-32 | 2665.33   | not significant |
| 347 | CORO1A      | -1.47 | 4.09E-67 | 4.30E-65 | 15044.88  | not significant |
| 348 | DBI         | -1.47 | 4.73E-41 | 2.17E-39 | 4695.11   | not significant |
| 349 | ENO1        | -1.47 | 8.05E-77 | 1.12E-74 | 82924.86  | not significant |
| 350 | PPA2        | -1.47 | 1.27E-22 | 1.93E-21 | 1035.27   | not significant |
| 351 | FADS2       | -1.47 | 1.99E-63 | 1.94E-61 | 14574.54  | not significant |
| 352 | PNPT1       | -1.46 | 1.41E-30 | 3.50E-29 | 1979.02   | not significant |
| 353 | GTBPBP4     | -1.46 | 6.24E-46 | 3.36E-44 | 4160.87   | not significant |
| 354 | PRMT5       | -1.46 | 2.42E-52 | 1.66E-50 | 3316.99   | not significant |
| 355 | RFTN1       | -1.46 | 2.29E-37 | 8.90E-36 | 1942.70   | not significant |
| 356 | TRMT10C     | -1.46 | 2.92E-30 | 7.16E-29 | 1740.58   | not significant |
| 357 | AHDC1       | -1.46 | 1.22E-26 | 2.42E-25 | 1242.29   | not significant |
| 358 | LRRC59      | -1.46 | 9.28E-75 | 1.23E-72 | 8408.64   | not significant |
| 359 | SLC45A3     | -1.46 | 7.89E-03 | 1.59E-02 | 31.95     | not significant |
| 360 | ARHGDI4     | -1.46 | 2.23E-87 | 4.40E-85 | 23959.58  | not significant |
| 361 | WDR43       | -1.46 | 4.72E-52 | 3.17E-50 | 3507.55   | not significant |
| 362 | UCHL3       | -1.46 | 2.52E-21 | 3.51E-20 | 975.66    | not significant |
| 363 | BUB1        | -1.46 | 1.83E-68 | 2.02E-66 | 7327.03   | not significant |
| 364 | NDUFAF2     | -1.46 | 3.95E-10 | 2.19E-09 | 364.11    | not significant |
| 365 | TAF12       | -1.46 | 2.47E-25 | 4.48E-24 | 1232.88   | not significant |
| 366 | TIMM44      | -1.46 | 2.65E-29 | 6.12E-28 | 1514.43   | not significant |
| 367 | TAP2        | -1.46 | 1.63E-16 | 1.59E-15 | 773.01    | not significant |
| 368 | PSMD1       | -1.45 | 3.77E-59 | 3.15E-57 | 4377.79   | not significant |
| 369 | SGOL2       | -1.45 | 9.55E-45 | 5.01E-43 | 4911.29   | not significant |
| 370 | FAM162A     | -1.45 | 4.61E-23 | 7.19E-22 | 1392.36   | not significant |
| 371 | TUBB4A      | -1.45 | 6.85E-08 | 2.98E-07 | 282.65    | not significant |
| 372 | FSIP1       | -1.45 | 1.49E-02 | 2.82E-02 | 15.72     | not significant |
| 373 | PFN1        | -1.45 | 1.43E-62 | 1.34E-60 | 44545.74  | not significant |
| 374 | COMMD1      | -1.45 | 2.01E-10 | 1.15E-09 | 380.74    | not significant |
| 375 | NANS        | -1.45 | 1.09E-11 | 7.03E-11 | 554.92    | not significant |
| 376 | TIMM23      | -1.45 | 1.99E-05 | 6.34E-05 | 152.35    | not significant |
| 377 | MANF        | -1.45 | 6.50E-15 | 5.60E-14 | 802.49    | not significant |
| 378 | BNIP1       | -1.45 | 1.22E-02 | 2.35E-02 | 23.24     | not significant |
| 379 | PYCR1       | -1.45 | 7.93E-24 | 1.31E-22 | 1275.18   | not significant |
| 380 | LCP1        | -1.45 | 2.50E-78 | 3.67E-76 | 40712.84  | not significant |
| 381 | IZUMO4      | -1.45 | 2.89E-03 | 6.34E-03 | 58.02     | not significant |
| 382 | SNHG4       | -1.45 | 1.75E-06 | 6.42E-06 | 221.27    | not significant |
| 383 | NFS1        | -1.45 | 4.56E-22 | 6.64E-21 | 1025.61   | not significant |
| 384 | VPREB1      | -1.45 | 1.49E-02 | 2.81E-02 | 17.38     | not significant |
| 385 | S100A11     | -1.45 | 3.16E-17 | 3.28E-16 | 782.51    | not significant |
| 386 | PSPH        | -1.45 | 2.22E-24 | 3.78E-23 | 1350.33   | not significant |
| 387 | ACTB        | -1.45 | 2.77E-69 | 3.16E-67 | 168054.54 | not significant |
| 388 | POLR3G      | -1.44 | 5.57E-22 | 8.07E-21 | 1025.15   | not significant |
| 389 | TCTN1       | -1.44 | 8.65E-05 | 2.51E-04 | 127.25    | not significant |
| 390 | CAMKMT      | -1.44 | 9.11E-07 | 3.46E-06 | 217.66    | not significant |
| 391 | IGFBP2      | -1.44 | 1.07E-33 | 3.33E-32 | 5621.81   | not significant |
| 392 | EIF5A       | -1.44 | 3.78E-50 | 2.39E-48 | 14357.89  | not significant |
| 393 | HIST1H4I    | -1.44 | 1.56E-02 | 2.92E-02 | 16.30     | not significant |
| 394 | ARL6IP5     | -1.44 | 3.66E-42 | 1.73E-40 | 2508.45   | not significant |
| 395 | MRPS28      | -1.44 | 1.04E-20 | 1.39E-19 | 1146.00   | not significant |
| 396 | PSMD12      | -1.44 | 9.70E-41 | 4.37E-39 | 2533.25   | not significant |
| 397 | NOL10       | -1.44 | 1.21E-31 | 3.23E-30 | 1807.64   | not significant |
| 398 | CCDC53      | -1.44 | 2.48E-17 | 2.59E-16 | 783.78    | not significant |
| 399 | ILK         | -1.44 | 1.69E-32 | 4.80E-31 | 1740.04   | not significant |
| 400 | FRRS1       | -1.44 | 4.66E-06 | 1.62E-05 | 189.85    | not significant |
| 401 | HEXIM1      | -1.44 | 2.34E-32 | 6.60E-31 | 1912.68   | not significant |
| 402 | FOXO6       | -1.44 | 5.48E-11 | 3.29E-10 | 444.03    | not significant |
| 403 | ATP5J2      | -1.44 | 6.65E-33 | 1.95E-31 | 2154.30   | not significant |
| 404 | ACTR3       | -1.43 | 1.46E-66 | 1.53E-64 | 11488.49  | not significant |
| 405 | SLC4A10     | -1.43 | 7.35E-05 | 2.15E-04 | 140.21    | not significant |
| 406 | TPM3        | -1.43 | 5.35E-79 | 8.17E-77 | 27202.04  | not significant |
| 407 | ACSL3       | -1.43 | 1.35E-37 | 5.36E-36 | 3411.74   | not significant |
| 408 | ADARB1      | -1.43 | 4.80E-20 | 6.15E-19 | 1125.14   | not significant |
| 409 | SH3BP1      | -1.43 | 1.93E-20 | 2.53E-19 | 1053.42   | not significant |
| 410 | CHD3        | -1.43 | 7.65E-51 | 4.92E-49 | 6105.40   | not significant |
| 411 | SWI5        | -1.43 | 3.15E-07 | 1.27E-06 | 317.16    | not significant |
| 412 | PRELID1     | -1.43 | 9.09E-36 | 3.21E-34 | 3626.46   | not significant |
| 413 | MAGOH       | -1.43 | 4.57E-29 | 1.05E-27 | 2301.34   | not significant |
| 414 | TMEM156     | -1.43 | 1.29E-06 | 4.82E-06 | 253.70    | not significant |
| 415 | SNRNP40     | -1.43 | 6.28E-36 | 2.26E-34 | 2813.67   | not significant |
| 416 | SFPQ        | -1.43 | 1.23E-54 | 9.13E-53 | 20747.65  | not significant |
| 417 | PXN         | -1.43 | 2.88E-13 | 2.13E-12 | 575.82    | not significant |
| 418 | PSME2       | -1.43 | 1.01E-38 | 4.22E-37 | 6686.59   | not significant |
| 419 | KCNJ14      | -1.43 | 4.04E-03 | 8.64E-03 | 60.68     | not significant |
| 420 | ALG8        | -1.43 | 3.01E-27 | 6.15E-26 | 1586.29   | not significant |
| 421 | ZCCHC14     | -1.43 | 8.63E-09 | 4.18E-08 | 374.30    | not significant |
| 422 | TIMM21      | -1.43 | 1.10E-18 | 1.28E-17 | 978.35    | not significant |
| 423 | KIAA0040    | -1.42 | 1.07E-19 | 1.34E-18 | 980.42    | not significant |
| 424 | MRPL17      | -1.42 | 1.32E-27 | 2.77E-26 | 1587.49   | not significant |
| 425 | HNRNPA2B1   | -1.42 | 7.51E-50 | 4.66E-48 | 73955.95  | not significant |
| 426 | FKBP1A      | -1.42 | 2.68E-69 | 3.09E-67 | 12379.38  | not significant |
| 427 | ALDH1B1     | -1.42 | 1.45E-04 | 4.05E-04 | 131.60    | not significant |
| 428 | C12orf5     | -1.42 | 2.70E-08 | 1.24E-07 | 346.76    | not significant |

|     |           |       |          |          |          |                 |
|-----|-----------|-------|----------|----------|----------|-----------------|
| 429 | LONRF2    | -1.42 | 4.49E-13 | 3.26E-12 | 689.39   | not significant |
| 430 | AGTRAP    | -1.42 | 5.24E-09 | 2.58E-08 | 366.66   | not significant |
| 431 | XPOT      | -1.42 | 9.96E-70 | 1.17E-67 | 8549.18  | not significant |
| 432 | SLC25A19  | -1.42 | 3.64E-24 | 6.14E-23 | 1355.47  | not significant |
| 433 | IDH3A     | -1.42 | 6.21E-39 | 2.61E-37 | 2637.35  | not significant |
| 434 | GAR1      | -1.42 | 8.70E-27 | 1.73E-25 | 1982.21  | not significant |
| 435 | UCHL5     | -1.42 | 2.36E-35 | 8.09E-34 | 3768.68  | not significant |
| 436 | IDE       | -1.42 | 4.28E-28 | 9.25E-27 | 1877.46  | not significant |
| 437 | GIPC1     | -1.42 | 1.18E-20 | 1.57E-19 | 1235.95  | not significant |
| 438 | C10orf54  | -1.42 | 6.43E-24 | 1.06E-22 | 1456.07  | not significant |
| 439 | RUVBL1    | -1.42 | 1.83E-37 | 7.19E-36 | 3652.01  | not significant |
| 440 | TC2N      | -1.42 | 5.84E-17 | 5.96E-16 | 875.63   | not significant |
| 441 | TTC1      | -1.42 | 2.22E-23 | 3.54E-22 | 1972.12  | not significant |
| 442 | CALM3     | -1.42 | 1.92E-68 | 2.08E-66 | 19914.38 | not significant |
| 443 | ANAPC1    | -1.42 | 8.23E-37 | 3.10E-35 | 2597.13  | not significant |
| 444 | PRMT3     | -1.42 | 4.57E-21 | 6.25E-20 | 1384.77  | not significant |
| 445 | POLR3B    | -1.42 | 2.91E-17 | 3.02E-16 | 939.68   | not significant |
| 446 | CCDC124   | -1.42 | 4.01E-35 | 1.35E-33 | 2908.30  | not significant |
| 447 | SLC9A9    | -1.42 | 2.18E-03 | 4.88E-03 | 69.25    | not significant |
| 448 | AMZ2      | -1.42 | 3.41E-14 | 2.75E-13 | 778.02   | not significant |
| 449 | CBS       | -1.42 | 3.13E-17 | 3.25E-16 | 935.75   | not significant |
| 450 | CMC1      | -1.41 | 2.28E-16 | 2.21E-15 | 851.16   | not significant |
| 451 | CRADD     | -1.41 | 1.05E-06 | 3.96E-06 | 264.78   | not significant |
| 452 | PPAP2A    | -1.41 | 2.81E-09 | 1.43E-08 | 411.11   | not significant |
| 453 | CCDC51    | -1.41 | 2.06E-08 | 9.55E-08 | 411.46   | not significant |
| 454 | TMPO-AS1  | -1.41 | 6.69E-18 | 7.35E-17 | 1062.83  | not significant |
| 455 | NOP16     | -1.41 | 4.96E-26 | 9.34E-25 | 1497.35  | not significant |
| 456 | HELZ2     | -1.41 | 7.73E-07 | 2.96E-06 | 252.14   | not significant |
| 457 | GSTM4     | -1.41 | 2.83E-03 | 6.23E-03 | 73.15    | not significant |
| 458 | C12orf60  | -1.41 | 1.19E-02 | 2.30E-02 | 32.29    | not significant |
| 459 | YARS      | -1.41 | 1.93E-62 | 1.79E-60 | 7661.66  | not significant |
| 460 | PSMB3     | -1.41 | 3.51E-31 | 9.06E-30 | 3290.90  | not significant |
| 461 | NANP      | -1.41 | 5.41E-18 | 5.97E-17 | 987.61   | not significant |
| 462 | YBX1      | -1.41 | 6.81E-55 | 5.14E-53 | 45359.57 | not significant |
| 463 | ARPP21    | -1.41 | 1.63E-14 | 1.35E-13 | 785.20   | not significant |
| 464 | PFDN6     | -1.41 | 1.24E-13 | 9.47E-13 | 742.33   | not significant |
| 465 | AMIGO3    | -1.41 | 3.39E-10 | 1.89E-09 | 494.28   | not significant |
| 466 | GGA2      | -1.41 | 1.41E-17 | 1.52E-16 | 909.05   | not significant |
| 467 | DNTTIP2   | -1.41 | 9.10E-31 | 2.29E-29 | 2807.82  | not significant |
| 468 | GSPT1     | -1.41 | 1.69E-68 | 1.87E-66 | 8746.93  | not significant |
| 469 | UQCR10    | -1.41 | 2.77E-31 | 7.20E-30 | 2663.05  | not significant |
| 470 | HSP90AA1  | -1.41 | 2.51E-39 | 1.07E-37 | 87590.95 | not significant |
| 471 | NT5DC2    | -1.41 | 7.66E-29 | 1.73E-27 | 1810.54  | not significant |
| 472 | FAS       | -1.41 | 6.71E-18 | 7.36E-17 | 1033.48  | not significant |
| 473 | TRERF1    | -1.41 | 7.12E-17 | 7.19E-16 | 903.61   | not significant |
| 474 | GLDC      | -1.41 | 2.20E-09 | 1.12E-08 | 426.90   | not significant |
| 475 | PSMC4     | -1.41 | 2.12E-43 | 1.03E-41 | 3497.51  | not significant |
| 476 | MPP6      | -1.41 | 7.91E-10 | 4.23E-09 | 440.41   | not significant |
| 477 | IFT27     | -1.41 | 1.26E-07 | 5.31E-07 | 313.21   | not significant |
| 478 | TNFSF9    | -1.40 | 3.27E-03 | 7.11E-03 | 65.51    | not significant |
| 479 | SPDL1     | -1.40 | 2.58E-32 | 7.23E-31 | 2663.87  | not significant |
| 480 | AHSA1     | -1.40 | 1.64E-32 | 4.67E-31 | 7058.32  | not significant |
| 481 | SH3TC1    | -1.40 | 2.48E-11 | 1.54E-10 | 580.18   | not significant |
| 482 | TAF15     | -1.40 | 2.26E-35 | 7.77E-34 | 4814.76  | not significant |
| 483 | FLT3LG    | -1.40 | 1.39E-07 | 5.83E-07 | 347.87   | not significant |
| 484 | FKBP2     | -1.40 | 3.12E-14 | 2.52E-13 | 820.53   | not significant |
| 485 | FBXO6     | -1.40 | 4.71E-05 | 1.42E-04 | 171.92   | not significant |
| 486 | BRIX1     | -1.40 | 1.23E-28 | 2.72E-27 | 2018.68  | not significant |
| 487 | INTS8     | -1.40 | 1.10E-25 | 2.05E-24 | 1858.87  | not significant |
| 488 | MZB1      | -1.40 | 8.92E-51 | 5.71E-49 | 5088.33  | not significant |
| 489 | ETFA      | -1.40 | 1.46E-33 | 4.48E-32 | 2969.07  | not significant |
| 490 | PHB       | -1.40 | 1.23E-43 | 6.09E-42 | 5184.77  | not significant |
| 491 | ODC1      | -1.40 | 1.01E-53 | 7.25E-52 | 13559.24 | not significant |
| 492 | FASTKD5   | -1.40 | 6.87E-17 | 6.94E-16 | 1084.59  | not significant |
| 493 | XPR1      | -1.40 | 6.32E-30 | 1.52E-28 | 1993.95  | not significant |
| 494 | GNAO1     | -1.40 | 7.57E-05 | 2.22E-04 | 153.29   | not significant |
| 495 | NUS1      | -1.40 | 2.07E-29 | 4.85E-28 | 2051.53  | not significant |
| 496 | COX7B     | -1.40 | 3.28E-06 | 1.16E-05 | 1538.22  | not significant |
| 497 | LOC257396 | -1.40 | 6.08E-03 | 1.25E-02 | 52.18    | not significant |
| 498 | RXRA      | -1.40 | 2.22E-06 | 8.04E-06 | 274.78   | not significant |
| 499 | MIF       | -1.40 | 4.03E-36 | 1.45E-34 | 15165.36 | not significant |
| 500 | VARS      | -1.40 | 1.01E-19 | 1.27E-18 | 2038.32  | not significant |
| 501 | ABCB9     | -1.40 | 3.64E-03 | 7.84E-03 | 63.42    | not significant |
| 502 | MED27     | -1.40 | 1.82E-11 | 1.14E-10 | 567.27   | not significant |
| 503 | CISH      | -1.40 | 2.95E-63 | 2.86E-61 | 9216.87  | not significant |
| 504 | KIAA1804  | -1.40 | 1.58E-04 | 4.38E-04 | 138.75   | not significant |
| 505 | NDUFC1    | -1.40 | 4.28E-16 | 4.03E-15 | 1020.01  | not significant |
| 506 | G6PD      | -1.39 | 1.46E-17 | 1.56E-16 | 1096.61  | not significant |
| 507 | RANBP1    | -1.39 | 6.26E-50 | 3.92E-48 | 7792.69  | not significant |
| 508 | BID       | -1.39 | 1.22E-33 | 3.78E-32 | 3542.47  | not significant |
| 509 | RANGAP1   | -1.39 | 9.19E-50 | 5.67E-48 | 7742.34  | not significant |
| 510 | MTHFD1L   | -1.39 | 3.39E-27 | 6.90E-26 | 2128.62  | not significant |
| 511 | PDE6G     | -1.39 | 1.04E-02 | 2.04E-02 | 39.25    | not significant |
| 512 | TOMM40    | -1.39 | 2.29E-27 | 4.72E-26 | 4094.36  | not significant |
| 513 | PSMA4     | -1.39 | 2.96E-46 | 1.60E-44 | 4766.46  | not significant |
| 514 | SPIB      | -1.39 | 1.75E-02 | 3.26E-02 | 21.58    | not significant |
| 515 | ITPR2     | -1.39 | 9.50E-29 | 2.12E-27 | 3501.32  | not significant |
| 516 | PTPN7     | -1.39 | 5.39E-60 | 4.71E-58 | 8523.95  | not significant |

|     |           |       |          |          |          |                 |
|-----|-----------|-------|----------|----------|----------|-----------------|
| 517 | ISOC2     | -1.39 | 6.20E-17 | 6.31E-16 | 1101.62  | not significant |
| 518 | MRPL47    | -1.39 | 2.55E-21 | 3.54E-20 | 1413.84  | not significant |
| 519 | SLC38A3   | -1.39 | 1.89E-02 | 3.48E-02 | 18.41    | not significant |
| 520 | CAMKK1    | -1.39 | 3.25E-05 | 1.01E-04 | 180.39   | not significant |
| 521 | CIB1      | -1.39 | 4.86E-30 | 1.18E-28 | 2351.02  | not significant |
| 522 | COQ2      | -1.39 | 1.91E-05 | 6.11E-05 | 200.62   | not significant |
| 523 | GAS2L1    | -1.39 | 3.73E-07 | 1.49E-06 | 295.81   | not significant |
| 524 | LSS       | -1.39 | 6.03E-29 | 1.37E-27 | 2104.48  | not significant |
| 525 | VEGFA     | -1.39 | 1.64E-11 | 1.03E-10 | 645.33   | not significant |
| 526 | PSME3     | -1.39 | 2.42E-51 | 1.58E-49 | 7171.88  | not significant |
| 527 | THNSL1    | -1.39 | 8.04E-11 | 4.76E-10 | 666.85   | not significant |
| 528 | SRXN1     | -1.39 | 1.11E-04 | 3.16E-04 | 170.66   | not significant |
| 529 | EIF2B3    | -1.39 | 5.63E-17 | 5.75E-16 | 1214.49  | not significant |
| 530 | PAPOLA    | -1.39 | 7.22E-49 | 4.24E-47 | 10952.26 | not significant |
| 531 | LACTB2    | -1.39 | 1.26E-07 | 5.31E-07 | 359.49   | not significant |
| 532 | TAGLN2    | -1.39 | 5.11E-49 | 3.06E-47 | 8726.62  | not significant |
| 533 | GTSF1     | -1.39 | 3.17E-06 | 1.13E-05 | 246.35   | not significant |
| 534 | GLS       | -1.39 | 2.28E-48 | 1.32E-46 | 7168.08  | not significant |
| 535 | CSE1L     | -1.39 | 3.68E-55 | 2.81E-53 | 9829.02  | not significant |
| 536 | PGAM1     | -1.39 | 3.26E-35 | 1.10E-33 | 2666.93  | not significant |
| 537 | HMBS      | -1.38 | 5.45E-14 | 4.31E-13 | 1090.64  | not significant |
| 538 | MYLK2     | -1.38 | 1.08E-02 | 2.10E-02 | 43.09    | not significant |
| 539 | KLHL29    | -1.38 | 8.18E-04 | 1.99E-03 | 114.86   | not significant |
| 540 | DEPDC1B   | -1.38 | 1.25E-31 | 3.32E-30 | 2474.49  | not significant |
| 541 | NDUFAF1   | -1.38 | 3.50E-07 | 1.40E-06 | 351.85   | not significant |
| 542 | METAP1D   | -1.38 | 1.15E-04 | 3.25E-04 | 166.63   | not significant |
| 543 | NUBPL     | -1.38 | 1.42E-06 | 5.30E-06 | 275.36   | not significant |
| 544 | CSRNP1    | -1.38 | 3.61E-05 | 1.11E-04 | 190.76   | not significant |
| 545 | EFHD2     | -1.38 | 6.34E-29 | 1.43E-27 | 3071.38  | not significant |
| 546 | ITPRIPL1  | -1.38 | 2.86E-15 | 2.53E-14 | 959.68   | not significant |
| 547 | NINJ1     | -1.38 | 7.19E-07 | 2.77E-06 | 302.62   | not significant |
| 548 | ETF1      | -1.38 | 4.41E-37 | 1.70E-35 | 6062.58  | not significant |
| 549 | POP4      | -1.38 | 3.76E-22 | 5.50E-21 | 1530.09  | not significant |
| 550 | SLC36A1   | -1.38 | 1.62E-07 | 6.73E-07 | 385.13   | not significant |
| 551 | CDH23     | -1.38 | 2.34E-04 | 6.31E-04 | 141.71   | not significant |
| 552 | MAMDC4    | -1.38 | 2.07E-03 | 4.67E-03 | 114.18   | not significant |
| 553 | PKI55     | -1.38 | 4.90E-08 | 2.18E-07 | 406.39   | not significant |
| 554 | DDX21     | -1.38 | 1.34E-58 | 1.12E-56 | 12922.85 | not significant |
| 555 | SLC7A5    | -1.38 | 1.09E-36 | 4.09E-35 | 14615.13 | not significant |
| 556 | ATP10D    | -1.38 | 3.61E-07 | 1.45E-06 | 330.76   | not significant |
| 557 | HSD17B10  | -1.38 | 3.07E-12 | 2.07E-11 | 728.75   | not significant |
| 558 | RND2      | -1.38 | 5.79E-03 | 1.20E-02 | 58.24    | not significant |
| 559 | SDHB      | -1.38 | 1.37E-29 | 3.25E-28 | 2690.53  | not significant |
| 560 | DBF4      | -1.38 | 2.02E-33 | 6.11E-32 | 3498.23  | not significant |
| 561 | TMEM173   | -1.38 | 1.75E-19 | 2.16E-18 | 1352.55  | not significant |
| 562 | LOC440600 | -1.38 | 1.84E-02 | 3.40E-02 | 23.62    | not significant |
| 563 | DPH6      | -1.38 | 1.28E-05 | 4.20E-05 | 223.69   | not significant |
| 564 | ARHGEF3   | -1.38 | 1.71E-25 | 3.14E-24 | 1849.23  | not significant |
| 565 | UBE2V2    | -1.38 | 1.18E-30 | 2.96E-29 | 4979.01  | not significant |
| 566 | ADM5      | -1.38 | 8.09E-05 | 2.36E-04 | 194.91   | not significant |
| 567 | PDI5      | -1.37 | 6.90E-13 | 4.94E-12 | 727.53   | not significant |
| 568 | TCEB3-AS1 | -1.37 | 1.63E-03 | 3.75E-03 | 93.80    | not significant |
| 569 | BOLA3     | -1.37 | 3.38E-13 | 2.48E-12 | 882.09   | not significant |
| 570 | CACYBP    | -1.37 | 7.86E-40 | 3.42E-38 | 4819.25  | not significant |
| 571 | NDUFA3    | -1.37 | 2.18E-13 | 1.63E-12 | 778.04   | not significant |
| 572 | SCPEP1    | -1.37 | 7.66E-09 | 3.72E-08 | 520.65   | not significant |
| 573 | CYCS      | -1.37 | 7.29E-30 | 1.75E-28 | 7221.64  | not significant |
| 574 | PNO1      | -1.37 | 3.43E-19 | 4.16E-18 | 1315.43  | not significant |
| 575 | PRADC1    | -1.37 | 1.47E-12 | 1.03E-11 | 763.86   | not significant |
| 576 | SBDS      | -1.37 | 3.12E-13 | 2.30E-12 | 926.44   | not significant |
| 577 | NMB       | -1.37 | 3.70E-04 | 9.60E-04 | 141.21   | not significant |
| 578 | ACSS2     | -1.37 | 6.99E-07 | 2.70E-06 | 321.54   | not significant |
| 579 | MPC1      | -1.37 | 1.88E-18 | 2.16E-17 | 1166.24  | not significant |
| 580 | USP5      | -1.37 | 3.64E-30 | 8.90E-29 | 2369.31  | not significant |
| 581 | PPP1R7    | -1.37 | 8.71E-22 | 1.25E-20 | 2249.57  | not significant |
| 582 | POR       | -1.37 | 1.03E-08 | 4.93E-08 | 523.89   | not significant |
| 583 | UBE3C     | -1.37 | 4.93E-32 | 1.35E-30 | 3630.70  | not significant |
| 584 | THRA      | -1.37 | 1.66E-12 | 1.15E-11 | 780.40   | not significant |
| 585 | GMPPA     | -1.37 | 6.13E-12 | 4.04E-11 | 683.10   | not significant |
| 586 | HLA-F     | -1.37 | 1.44E-02 | 2.73E-02 | 34.55    | not significant |
| 587 | NFE2L2    | -1.37 | 1.11E-24 | 1.93E-23 | 1792.73  | not significant |
| 588 | MRPL2     | -1.37 | 6.63E-14 | 5.19E-13 | 813.48   | not significant |
| 589 | RPP38     | -1.37 | 1.49E-07 | 6.26E-07 | 370.02   | not significant |
| 590 | LGALS8    | -1.37 | 2.24E-26 | 4.32E-25 | 2020.22  | not significant |
| 591 | ENDOG     | -1.37 | 1.82E-05 | 5.82E-05 | 244.63   | not significant |
| 592 | MAML2     | -1.37 | 1.66E-02 | 3.11E-02 | 29.74    | not significant |
| 593 | HLA-B     | -1.37 | 4.36E-27 | 8.78E-26 | 7754.05  | not significant |
| 594 | NOC2L     | -1.37 | 7.37E-36 | 2.63E-34 | 3634.94  | not significant |
| 595 | NARS2     | -1.37 | 2.40E-15 | 2.13E-14 | 1288.32  | not significant |
| 596 | C1GALT1C1 | -1.37 | 2.08E-07 | 8.54E-07 | 407.70   | not significant |
| 597 | CD3EAP    | -1.37 | 6.79E-11 | 4.05E-10 | 714.25   | not significant |
| 598 | AIFM1     | -1.37 | 9.40E-21 | 1.26E-19 | 2145.24  | not significant |
| 599 | MECR      | -1.37 | 2.85E-11 | 1.76E-10 | 624.52   | not significant |
| 600 | IL15RA    | -1.37 | 7.03E-05 | 2.07E-04 | 208.65   | not significant |
| 601 | RPS27L    | -1.37 | 1.06E-13 | 8.15E-13 | 860.72   | not significant |
| 602 | SAT2      | -1.36 | 2.92E-03 | 6.40E-03 | 90.20    | not significant |
| 603 | GOT1      | -1.36 | 8.88E-20 | 1.12E-18 | 1481.98  | not significant |
| 604 | ANXA6     | -1.36 | 3.19E-47 | 1.78E-45 | 7708.91  | not significant |

|     |              |       |          |          |          |                 |
|-----|--------------|-------|----------|----------|----------|-----------------|
| 605 | METTL5       | -1.36 | 4.53E-13 | 3.29E-12 | 879.46   | not significant |
| 606 | TAF13        | -1.36 | 1.76E-05 | 5.66E-05 | 241.70   | not significant |
| 607 | CCNA2        | -1.36 | 7.23E-57 | 5.85E-55 | 8397.48  | not significant |
| 608 | GALK2        | -1.36 | 4.16E-08 | 1.86E-07 | 458.78   | not significant |
| 609 | IKZF4        | -1.36 | 1.73E-11 | 1.09E-10 | 650.19   | not significant |
| 610 | KANK2        | -1.36 | 4.85E-04 | 1.23E-03 | 134.15   | not significant |
| 611 | GALK1        | -1.36 | 1.65E-21 | 2.32E-20 | 1739.03  | not significant |
| 612 | TUBG1        | -1.36 | 1.02E-22 | 1.55E-21 | 1855.07  | not significant |
| 613 | ETNK1        | -1.36 | 3.46E-33 | 1.02E-31 | 4047.32  | not significant |
| 614 | WARS         | -1.36 | 2.72E-26 | 5.20E-25 | 2030.13  | not significant |
| 615 | C1orf74      | -1.36 | 5.38E-04 | 1.35E-03 | 132.21   | not significant |
| 616 | TIMMDC1      | -1.36 | 2.04E-22 | 3.04E-21 | 1708.53  | not significant |
| 617 | DKC1         | -1.36 | 3.91E-31 | 1.01E-29 | 3215.27  | not significant |
| 618 | SCOC-AS1     | -1.36 | 1.27E-02 | 2.44E-02 | 46.40    | not significant |
| 619 | HIST1H2AJ    | -1.36 | 2.04E-02 | 3.74E-02 | 23.09    | not significant |
| 620 | CHTF8        | -1.36 | 6.85E-33 | 2.00E-31 | 5408.16  | not significant |
| 621 | MRPL36       | -1.36 | 1.29E-09 | 6.72E-09 | 533.74   | not significant |
| 622 | RPL26L1      | -1.36 | 5.73E-08 | 2.52E-07 | 550.50   | not significant |
| 623 | PRMT1        | -1.36 | 8.15E-34 | 2.55E-32 | 7952.65  | not significant |
| 624 | LINC00852    | -1.36 | 1.15E-02 | 2.23E-02 | 44.90    | not significant |
| 625 | SNRPC        | -1.36 | 1.13E-29 | 2.68E-28 | 3664.05  | not significant |
| 626 | TBC1D16      | -1.36 | 1.13E-06 | 4.25E-06 | 338.29   | not significant |
| 627 | HMGCL        | -1.36 | 3.99E-08 | 1.79E-07 | 454.11   | not significant |
| 628 | CDC123       | -1.36 | 5.55E-31 | 1.42E-29 | 4139.88  | not significant |
| 629 | ANXA4        | -1.36 | 8.83E-10 | 4.68E-09 | 592.02   | not significant |
| 630 | ARHGDIB      | -1.36 | 6.14E-44 | 3.10E-42 | 39419.17 | not significant |
| 631 | ABCE1        | -1.36 | 3.22E-45 | 1.70E-43 | 6673.27  | not significant |
| 632 | DPF3         | -1.36 | 2.25E-09 | 1.15E-08 | 566.52   | not significant |
| 633 | SBF2-AS1     | -1.36 | 3.40E-06 | 1.20E-05 | 317.10   | not significant |
| 634 | CFL1         | -1.36 | 4.93E-34 | 1.57E-32 | 33634.19 | not significant |
| 635 | GNAI2        | -1.36 | 7.95E-33 | 2.30E-31 | 4533.02  | not significant |
| 636 | ATP5G1       | -1.36 | 4.72E-22 | 6.85E-21 | 2055.01  | not significant |
| 637 | HSPA4L       | -1.36 | 5.56E-16 | 5.20E-15 | 1052.73  | not significant |
| 638 | C2orf74      | -1.36 | 5.18E-04 | 1.31E-03 | 147.33   | not significant |
| 639 | HLA-A        | -1.36 | 6.57E-25 | 1.17E-23 | 3276.23  | not significant |
| 640 | CDC27        | -1.36 | 5.02E-40 | 2.20E-38 | 4773.38  | not significant |
| 641 | STEAP1B      | -1.36 | 3.06E-03 | 6.68E-03 | 83.09    | not significant |
| 642 | TBRG4        | -1.35 | 2.44E-32 | 6.86E-31 | 3647.65  | not significant |
| 643 | HOXB7        | -1.35 | 1.69E-03 | 3.86E-03 | 102.58   | not significant |
| 644 | NUGGC        | -1.35 | 3.02E-05 | 9.37E-05 | 233.43   | not significant |
| 645 | TMEM163      | -1.35 | 1.69E-05 | 5.43E-05 | 235.82   | not significant |
| 646 | MDH2         | -1.35 | 1.55E-28 | 3.42E-27 | 4614.53  | not significant |
| 647 | GTF3A        | -1.35 | 5.86E-44 | 2.97E-42 | 10407.62 | not significant |
| 648 | LAMTOR2      | -1.35 | 1.26E-13 | 9.60E-13 | 890.74   | not significant |
| 649 | MRPL4        | -1.35 | 2.98E-28 | 6.47E-27 | 3237.66  | not significant |
| 650 | PRKCD        | -1.35 | 2.86E-05 | 8.92E-05 | 247.83   | not significant |
| 651 | LSM10        | -1.35 | 8.56E-11 | 5.06E-10 | 833.86   | not significant |
| 652 | MRPL51       | -1.35 | 4.29E-24 | 7.20E-23 | 3543.97  | not significant |
| 653 | MPP5         | -1.35 | 5.79E-12 | 3.83E-11 | 756.79   | not significant |
| 654 | KAZALD1      | -1.35 | 2.04E-02 | 3.74E-02 | 15.01    | not significant |
| 655 | SHC1         | -1.35 | 9.93E-27 | 1.98E-25 | 2553.44  | not significant |
| 656 | DUSP2        | -1.35 | 2.32E-10 | 1.32E-09 | 611.80   | not significant |
| 657 | CYP4F3       | -1.35 | 1.85E-02 | 3.42E-02 | 11.50    | not significant |
| 658 | MCU          | -1.35 | 8.86E-14 | 6.85E-13 | 963.95   | not significant |
| 659 | GPD1L        | -1.35 | 8.25E-10 | 4.39E-09 | 577.53   | not significant |
| 660 | PALD1        | -1.35 | 6.53E-08 | 2.85E-07 | 434.80   | not significant |
| 661 | AKAP6        | -1.35 | 6.25E-03 | 1.28E-02 | 73.78    | not significant |
| 662 | TRDMT1       | -1.35 | 2.67E-11 | 1.65E-10 | 751.72   | not significant |
| 663 | BCCIP        | -1.35 | 1.66E-29 | 3.92E-28 | 3537.03  | not significant |
| 664 | MMAA         | -1.35 | 3.52E-08 | 1.59E-07 | 469.79   | not significant |
| 665 | EMP3         | -1.35 | 4.08E-10 | 2.26E-09 | 594.81   | not significant |
| 666 | PLGRKT       | -1.35 | 2.51E-08 | 1.15E-07 | 483.16   | not significant |
| 667 | UQCRQ        | -1.35 | 1.35E-22 | 2.04E-21 | 2442.54  | not significant |
| 668 | PELI3        | -1.35 | 6.88E-03 | 1.40E-02 | 71.56    | not significant |
| 669 | TUBE1        | -1.35 | 3.39E-04 | 8.86E-04 | 163.62   | not significant |
| 670 | LOC100506100 | -1.35 | 2.28E-05 | 7.19E-05 | 255.28   | not significant |
| 671 | USP40        | -1.35 | 2.28E-11 | 1.42E-10 | 690.46   | not significant |
| 672 | IL22RA1      | -1.35 | 2.32E-03 | 5.17E-03 | 95.37    | not significant |
| 673 | BATF         | -1.35 | 1.33E-10 | 7.74E-10 | 741.12   | not significant |
| 674 | CCDC28B      | -1.35 | 1.47E-11 | 9.36E-11 | 829.71   | not significant |
| 675 | MEMO1        | -1.35 | 1.42E-09 | 7.36E-09 | 669.40   | not significant |
| 676 | DAZAP1       | -1.35 | 5.05E-38 | 2.06E-36 | 8657.65  | not significant |
| 677 | MRTO4        | -1.35 | 2.94E-33 | 8.78E-32 | 3515.74  | not significant |
| 678 | ACOT11       | -1.35 | 1.22E-02 | 2.35E-02 | 46.73    | not significant |
| 679 | C1orf131     | -1.35 | 1.53E-13 | 1.16E-12 | 976.55   | not significant |
| 680 | AGRN         | -1.35 | 5.63E-03 | 1.17E-02 | 73.32    | not significant |
| 681 | HEATR3       | -1.34 | 4.33E-14 | 3.44E-13 | 1010.45  | not significant |
| 682 | BCS1L        | -1.34 | 1.83E-09 | 9.43E-09 | 558.67   | not significant |
| 683 | SNHG3        | -1.34 | 3.77E-05 | 1.16E-04 | 1516.82  | not significant |
| 684 | MRPL23       | -1.34 | 5.63E-23 | 8.74E-22 | 2058.45  | not significant |
| 685 | ZNF788       | -1.34 | 7.40E-08 | 3.21E-07 | 464.13   | not significant |
| 686 | ASPH         | -1.34 | 1.52E-06 | 5.63E-06 | 332.08   | not significant |
| 687 | RNF6         | -1.34 | 8.76E-28 | 1.86E-26 | 2674.81  | not significant |
| 688 | PPP1CA       | -1.34 | 1.99E-34 | 6.47E-33 | 10455.64 | not significant |
| 689 | NETO1        | -1.34 | 2.32E-03 | 5.19E-03 | 104.35   | not significant |
| 690 | FPGT         | -1.34 | 2.71E-05 | 8.46E-05 | 238.88   | not significant |
| 691 | STX8         | -1.34 | 1.39E-08 | 6.53E-08 | 650.35   | not significant |
| 692 | PIWIL3       | -1.34 | 1.46E-03 | 3.40E-03 | 118.60   | not significant |



|     |            |       |          |          |          |                 |
|-----|------------|-------|----------|----------|----------|-----------------|
| 693 | PSRC1      | -1.34 | 1.71E-12 | 1.18E-11 | 1083.90  | not significant |
| 694 | AMPD3      | -1.34 | 3.82E-15 | 3.35E-14 | 1157.14  | not significant |
| 695 | PPID       | -1.34 | 6.96E-25 | 1.23E-23 | 2141.26  | not significant |
| 696 | MKNK2      | -1.34 | 2.92E-28 | 6.36E-27 | 5719.57  | not significant |
| 697 | AVIL       | -1.34 | 1.46E-02 | 2.77E-02 | 42.08    | not significant |
| 698 | PCGF2      | -1.34 | 4.53E-06 | 1.57E-05 | 308.29   | not significant |
| 699 | MCEE       | -1.34 | 1.21E-03 | 2.85E-03 | 120.76   | not significant |
| 700 | BCL2L14    | -1.34 | 1.85E-02 | 3.42E-02 | 34.58    | not significant |
| 701 | OXNAD1     | -1.34 | 3.03E-11 | 1.87E-10 | 756.93   | not significant |
| 702 | HEATR1     | -1.34 | 1.53E-21 | 2.15E-20 | 4089.98  | not significant |
| 703 | AP1S1      | -1.34 | 4.57E-17 | 4.69E-16 | 1295.59  | not significant |
| 704 | NAT1       | -1.34 | 3.74E-06 | 1.31E-05 | 316.54   | not significant |
| 705 | ARPC2      | -1.34 | 1.87E-34 | 6.08E-33 | 12148.01 | not significant |
| 706 | COMM10     | -1.34 | 1.12E-11 | 7.22E-11 | 843.13   | not significant |
| 707 | GALNS      | -1.34 | 4.92E-06 | 1.70E-05 | 308.32   | not significant |
| 708 | PSMC2      | -1.34 | 1.43E-34 | 4.70E-33 | 3615.71  | not significant |
| 709 | MRPL20     | -1.34 | 5.13E-18 | 5.69E-17 | 2258.07  | not significant |
| 710 | ZHX1       | -1.34 | 2.65E-33 | 7.95E-32 | 3814.84  | not significant |
| 711 | BMS1       | -1.34 | 5.03E-26 | 9.45E-25 | 3440.68  | not significant |
| 712 | CTU2       | -1.34 | 5.45E-11 | 3.28E-10 | 816.67   | not significant |
| 713 | NAA15      | -1.34 | 3.31E-36 | 1.21E-34 | 5599.84  | not significant |
| 714 | ITPR1      | -1.34 | 6.16E-10 | 3.34E-09 | 752.23   | not significant |
| 715 | COASY      | -1.34 | 1.61E-27 | 3.36E-26 | 2617.93  | not significant |
| 716 | IMPDH1     | -1.34 | 1.63E-12 | 1.13E-11 | 929.95   | not significant |
| 717 | MRPL22     | -1.34 | 1.29E-14 | 1.08E-13 | 1184.13  | not significant |
| 718 | NLN        | -1.34 | 1.66E-16 | 1.62E-15 | 1455.34  | not significant |
| 719 | ALDH2      | -1.34 | 1.84E-02 | 3.40E-02 | 35.50    | not significant |
| 720 | EIF3J      | -1.34 | 6.31E-24 | 1.05E-22 | 3127.59  | not significant |
| 721 | CISD3      | -1.34 | 6.39E-16 | 5.96E-15 | 1335.93  | not significant |
| 722 | PAPD5      | -1.34 | 5.62E-15 | 4.85E-14 | 1081.63  | not significant |
| 723 | BATF3      | -1.34 | 3.24E-10 | 1.81E-09 | 652.43   | not significant |
| 724 | RITA1      | -1.34 | 9.37E-17 | 9.40E-16 | 1683.05  | not significant |
| 725 | ACN9       | -1.34 | 2.37E-11 | 1.47E-10 | 842.97   | not significant |
| 726 | ATP5G3     | -1.33 | 1.37E-32 | 3.92E-31 | 7112.47  | not significant |
| 727 | NOLC1      | -1.33 | 2.35E-47 | 1.32E-45 | 12557.61 | not significant |
| 728 | ECHDC1     | -1.33 | 2.01E-26 | 3.89E-25 | 3149.71  | not significant |
| 729 | TPCN1      | -1.33 | 2.93E-12 | 1.98E-11 | 852.78   | not significant |
| 730 | PPIP5K1    | -1.33 | 2.16E-04 | 5.86E-04 | 185.90   | not significant |
| 731 | TUBB2A     | -1.33 | 7.20E-03 | 1.46E-02 | 73.05    | not significant |
| 732 | NDUFA12    | -1.33 | 4.08E-20 | 5.24E-19 | 2642.27  | not significant |
| 733 | RRP36      | -1.33 | 1.21E-17 | 1.30E-16 | 1942.46  | not significant |
| 734 | SNAPC5     | -1.33 | 1.58E-04 | 4.39E-04 | 200.84   | not significant |
| 735 | ANAPC15    | -1.33 | 1.07E-22 | 1.63E-21 | 1976.67  | not significant |
| 736 | RSU1       | -1.33 | 2.09E-21 | 2.92E-20 | 1975.46  | not significant |
| 737 | KIF20A     | -1.33 | 6.91E-25 | 1.22E-23 | 2484.41  | not significant |
| 738 | ATG3       | -1.33 | 2.94E-32 | 8.16E-31 | 3541.83  | not significant |
| 739 | CDKN2AIPNL | -1.33 | 8.90E-14 | 6.87E-13 | 1273.67  | not significant |
| 740 | CHMP2A     | -1.33 | 1.15E-14 | 9.66E-14 | 1298.21  | not significant |
| 741 | ARF3       | -1.33 | 5.08E-28 | 1.09E-26 | 8448.76  | not significant |
| 742 | UACA       | -1.33 | 1.81E-02 | 3.36E-02 | 11.58    | not significant |
| 743 | NDUFS6     | -1.33 | 6.81E-06 | 2.31E-05 | 2736.09  | not significant |
| 744 | LTB        | -1.33 | 1.09E-08 | 5.21E-08 | 637.87   | not significant |
| 745 | SSB        | -1.33 | 1.52E-21 | 2.15E-20 | 5162.48  | not significant |
| 746 | C20orf24   | -1.33 | 9.16E-12 | 5.95E-11 | 1072.73  | not significant |
| 747 | ERH        | -1.33 | 1.26E-35 | 4.40E-34 | 8310.23  | not significant |
| 748 | INPP4B     | -1.33 | 2.74E-07 | 1.11E-06 | 447.04   | not significant |
| 749 | PPARGC1B   | -1.33 | 2.27E-07 | 9.30E-07 | 617.45   | not significant |
| 750 | FTH1       | -1.33 | 1.06E-27 | 2.23E-26 | 22079.61 | not significant |
| 751 | ZNF480     | -1.33 | 8.52E-21 | 1.15E-19 | 1814.83  | not significant |
| 752 | PPP2R2A    | -1.33 | 5.00E-24 | 8.33E-23 | 2779.13  | not significant |
| 753 | SLC2A3     | -1.33 | 1.67E-07 | 6.95E-07 | 457.84   | not significant |
| 754 | STRAP      | -1.33 | 2.20E-32 | 6.23E-31 | 5446.08  | not significant |
| 755 | EIF4E      | -1.33 | 3.94E-19 | 4.74E-18 | 1596.39  | not significant |
| 756 | EHBP1      | -1.33 | 2.79E-13 | 2.07E-12 | 965.12   | not significant |
| 757 | ADCY7      | -1.33 | 5.79E-22 | 8.38E-21 | 2322.29  | not significant |
| 758 | SKP1       | -1.33 | 7.93E-34 | 2.49E-32 | 9368.87  | not significant |
| 759 | GPSM2      | -1.33 | 9.52E-17 | 9.53E-16 | 1696.86  | not significant |
| 760 | BRE        | -1.33 | 1.17E-11 | 7.48E-11 | 841.69   | not significant |
| 761 | ANKRD52    | -1.33 | 1.81E-08 | 8.43E-08 | 5853.23  | not significant |
| 762 | RPL39L     | -1.33 | 9.64E-17 | 9.63E-16 | 1377.00  | not significant |
| 763 | SNX33      | -1.32 | 1.07E-02 | 2.08E-02 | 61.66    | not significant |
| 764 | KNOP1      | -1.32 | 4.14E-13 | 3.03E-12 | 1107.42  | not significant |
| 765 | AIMP2      | -1.32 | 8.15E-15 | 6.94E-14 | 1232.55  | not significant |
| 766 | TXNIP      | -1.32 | 8.56E-10 | 4.55E-09 | 717.45   | not significant |
| 767 | ACAT1      | -1.32 | 2.26E-18 | 2.57E-17 | 1785.15  | not significant |
| 768 | MRPS34     | -1.32 | 2.69E-21 | 3.73E-20 | 3019.48  | not significant |
| 769 | POLR2L     | -1.32 | 3.10E-20 | 3.99E-19 | 2179.11  | not significant |
| 770 | DCLRE1A    | -1.32 | 7.51E-15 | 6.41E-14 | 1260.49  | not significant |
| 771 | TCP10L     | -1.32 | 7.54E-03 | 1.52E-02 | 74.39    | not significant |
| 772 | APOBEC3D   | -1.32 | 5.65E-08 | 2.49E-07 | 594.42   | not significant |
| 773 | CA6        | -1.32 | 5.19E-03 | 1.08E-02 | 94.76    | not significant |
| 774 | TRAPPC1    | -1.32 | 1.70E-23 | 2.74E-22 | 3524.05  | not significant |
| 775 | TANK       | -1.32 | 2.82E-20 | 3.66E-19 | 1787.26  | not significant |
| 776 | KIAA0196   | -1.32 | 3.86E-26 | 7.33E-25 | 3215.36  | not significant |
| 777 | HSPA4      | -1.32 | 1.14E-36 | 4.24E-35 | 6659.79  | not significant |
| 778 | RUVBL2     | -1.32 | 2.45E-31 | 6.42E-30 | 4877.08  | not significant |
| 779 | UTP15      | -1.32 | 9.87E-13 | 6.99E-12 | 983.49   | not significant |
| 780 | CRYZ       | -1.32 | 1.62E-10 | 9.35E-10 | 907.32   | not significant |

|     |           |       |          |          |          |                 |
|-----|-----------|-------|----------|----------|----------|-----------------|
| 781 | PUS7      | -1.32 | 3.88E-18 | 4.36E-17 | 1801.75  | not significant |
| 782 | OASL      | -1.32 | 1.16E-03 | 2.75E-03 | 141.76   | not significant |
| 783 | MRPL39    | -1.32 | 4.25E-13 | 3.10E-12 | 1052.43  | not significant |
| 784 | KCND1     | -1.32 | 1.96E-02 | 3.60E-02 | 11.02    | not significant |
| 785 | COA7      | -1.32 | 6.21E-09 | 3.03E-08 | 634.15   | not significant |
| 786 | DYNLL1    | -1.32 | 1.34E-32 | 3.84E-31 | 4705.95  | not significant |
| 787 | TIMM8B    | -1.32 | 1.63E-10 | 9.38E-10 | 936.02   | not significant |
| 788 | SLC19A2   | -1.32 | 3.14E-07 | 1.27E-06 | 449.76   | not significant |
| 789 | HAT1      | -1.32 | 2.75E-25 | 4.99E-24 | 3802.87  | not significant |
| 790 | GPI       | -1.32 | 1.27E-46 | 6.91E-45 | 15519.86 | not significant |
| 791 | MRPS12    | -1.32 | 2.84E-13 | 2.10E-12 | 1237.64  | not significant |
| 792 | CAP1      | -1.32 | 7.70E-40 | 3.36E-38 | 10122.83 | not significant |
| 793 | DHX15     | -1.32 | 6.02E-45 | 3.17E-43 | 11677.79 | not significant |
| 794 | DIMT1     | -1.32 | 1.33E-15 | 1.21E-14 | 1398.49  | not significant |
| 795 | ALDOA     | -1.32 | 7.43E-47 | 4.11E-45 | 24525.86 | not significant |
| 796 | NSUN2     | -1.32 | 4.64E-35 | 1.56E-33 | 5017.99  | not significant |
| 797 | VCL       | -1.32 | 1.50E-02 | 2.83E-02 | 49.99    | not significant |
| 798 | TOMM5     | -1.32 | 1.26E-27 | 2.66E-26 | 3672.01  | not significant |
| 799 | LST1      | -1.32 | 2.44E-03 | 5.42E-03 | 120.98   | not significant |
| 800 | BIRC5     | -1.32 | 5.67E-34 | 1.80E-32 | 11055.48 | not significant |
| 801 | DYNLRB1   | -1.32 | 1.64E-24 | 2.82E-23 | 3266.93  | not significant |
| 802 | RBM26-AS1 | -1.32 | 7.44E-04 | 1.82E-03 | 158.18   | not significant |
| 803 | NCEH1     | -1.32 | 5.43E-06 | 1.87E-05 | 346.12   | not significant |
| 804 | SORD      | -1.32 | 3.58E-12 | 2.40E-11 | 967.48   | not significant |
| 805 | HIGD1A    | -1.32 | 1.42E-19 | 1.76E-18 | 3162.82  | not significant |
| 806 | MCTS2P    | -1.32 | 1.24E-04 | 3.49E-04 | 224.81   | not significant |
| 807 | EIF3B     | -1.32 | 6.82E-39 | 2.85E-37 | 11534.78 | not significant |
| 808 | AK6       | -1.32 | 1.61E-05 | 5.21E-05 | 335.98   | not significant |
| 809 | USB1      | -1.32 | 1.21E-22 | 1.83E-21 | 3065.05  | not significant |
| 810 | CCZ1B     | -1.32 | 1.07E-09 | 5.66E-09 | 768.83   | not significant |
| 811 | TPH1      | -1.32 | 3.21E-24 | 5.42E-23 | 5655.48  | not significant |
| 812 | TMEM241   | -1.32 | 1.58E-05 | 5.11E-05 | 319.72   | not significant |
| 813 | ZMAT5     | -1.32 | 1.29E-08 | 6.11E-08 | 731.84   | not significant |
| 814 | SCN2A     | -1.31 | 2.69E-02 | 4.78E-02 | 23.32    | not significant |
| 815 | ITGB2     | -1.31 | 8.82E-29 | 1.98E-27 | 3458.77  | not significant |
| 816 | DOC2A     | -1.31 | 8.46E-03 | 1.69E-02 | 80.81    | not significant |
| 817 | RNF145    | -1.31 | 7.91E-31 | 2.01E-29 | 4724.45  | not significant |
| 818 | PMAIP1    | -1.31 | 1.44E-27 | 3.01E-26 | 3305.51  | not significant |
| 819 | SRA1      | -1.31 | 4.93E-09 | 2.44E-08 | 711.25   | not significant |
| 820 | TARS      | -1.31 | 2.28E-30 | 5.62E-29 | 6273.41  | not significant |
| 821 | ZMPSTE24  | -1.31 | 1.76E-23 | 2.83E-22 | 2395.15  | not significant |
| 822 | UBAP2L    | -1.31 | 1.15E-33 | 3.54E-32 | 8228.82  | not significant |
| 823 | ERC1      | -1.31 | 1.48E-10 | 8.58E-10 | 835.64   | not significant |
| 824 | IGSF3     | -1.31 | 8.08E-08 | 3.49E-07 | 523.12   | not significant |
| 825 | MRPS15    | -1.31 | 1.24E-18 | 1.45E-17 | 2746.67  | not significant |
| 826 | FADD      | -1.31 | 5.03E-11 | 3.04E-10 | 1029.52  | not significant |
| 827 | DCAF13    | -1.31 | 3.72E-20 | 4.78E-19 | 2676.54  | not significant |
| 828 | CIRH1A    | -1.31 | 1.68E-21 | 2.36E-20 | 2112.52  | not significant |
| 829 | ADAT3     | -1.31 | 1.16E-03 | 2.75E-03 | 148.52   | not significant |
| 830 | GRWD1     | -1.31 | 1.47E-16 | 1.45E-15 | 2226.32  | not significant |
| 831 | ZNF593    | -1.31 | 3.95E-05 | 1.21E-04 | 285.11   | not significant |
| 832 | TOB1      | -1.31 | 8.44E-08 | 3.63E-07 | 513.77   | not significant |
| 833 | ARL15     | -1.31 | 2.99E-04 | 7.88E-04 | 209.20   | not significant |
| 834 | KIF14     | -1.31 | 1.13E-26 | 2.23E-25 | 4359.81  | not significant |
| 835 | LOC440028 | -1.31 | 2.73E-02 | 4.85E-02 | 23.33    | not significant |
| 836 | FXYD2     | -1.31 | 8.19E-03 | 1.64E-02 | 92.97    | not significant |
| 837 | TAP1      | -1.31 | 2.46E-12 | 1.68E-11 | 1020.07  | not significant |
| 838 | HRSP12    | -1.31 | 1.33E-07 | 5.58E-07 | 521.74   | not significant |
| 839 | LIN28B    | -1.31 | 1.52E-24 | 2.61E-23 | 3247.11  | not significant |
| 840 | SUPT4H1   | -1.31 | 1.48E-33 | 4.51E-32 | 5024.29  | not significant |
| 841 | C12orf66  | -1.31 | 6.10E-07 | 2.37E-06 | 445.26   | not significant |
| 842 | GPR75     | -1.31 | 2.08E-02 | 3.80E-02 | 46.19    | not significant |
| 843 | XRCC6     | -1.31 | 5.67E-32 | 1.54E-30 | 20979.61 | not significant |
| 844 | FARP2     | -1.31 | 2.16E-05 | 6.83E-05 | 316.75   | not significant |
| 845 | CRELD2    | -1.31 | 5.59E-09 | 2.74E-08 | 885.65   | not significant |
| 846 | HSD17B4   | -1.31 | 1.13E-23 | 1.85E-22 | 2993.46  | not significant |
| 847 | PDP2      | -1.31 | 1.17E-13 | 8.94E-13 | 1477.35  | not significant |
| 848 | SLFN12L   | -1.31 | 1.16E-03 | 2.74E-03 | 166.93   | not significant |
| 849 | USP7      | -1.31 | 1.24E-37 | 4.92E-36 | 10918.55 | not significant |
| 850 | RRP9      | -1.31 | 6.68E-16 | 6.21E-15 | 1454.96  | not significant |
| 851 | PHGDH     | -1.31 | 1.28E-35 | 4.45E-34 | 7663.96  | not significant |
| 852 | DPM1      | -1.31 | 4.35E-18 | 4.87E-17 | 2030.98  | not significant |
| 853 | DNAJB6    | -1.31 | 1.62E-27 | 3.36E-26 | 6381.68  | not significant |
| 854 | ICT1      | -1.31 | 5.88E-12 | 3.88E-11 | 1199.48  | not significant |
| 855 | ETFDH     | -1.31 | 3.80E-09 | 1.90E-08 | 720.23   | not significant |
| 856 | AARS      | -1.31 | 2.29E-35 | 7.86E-34 | 7257.28  | not significant |
| 857 | POLR2F    | -1.31 | 2.92E-16 | 2.79E-15 | 1672.33  | not significant |
| 858 | CLN8      | -1.31 | 7.51E-06 | 2.54E-05 | 350.26   | not significant |
| 859 | CINP      | -1.31 | 2.19E-11 | 1.37E-10 | 867.77   | not significant |
| 860 | WDR75     | -1.31 | 1.97E-17 | 2.08E-16 | 1986.45  | not significant |
| 861 | CALM1     | -1.31 | 1.14E-33 | 3.54E-32 | 6609.44  | not significant |
| 862 | HABP4     | -1.31 | 3.84E-03 | 8.26E-03 | 105.95   | not significant |
| 863 | MRPL52    | -1.31 | 2.15E-13 | 1.62E-12 | 1229.48  | not significant |
| 864 | TOP1      | -1.31 | 5.30E-37 | 2.02E-35 | 9945.39  | not significant |
| 865 | SLC25A32  | -1.31 | 3.26E-16 | 3.10E-15 | 2867.19  | not significant |
| 866 | N6AMT2    | -1.31 | 1.38E-05 | 4.48E-05 | 336.20   | not significant |
| 867 | TPX2      | -1.31 | 2.49E-44 | 1.29E-42 | 17237.85 | not significant |
| 868 | WDR4      | -1.31 | 1.35E-08 | 6.37E-08 | 597.63   | not significant |

|     |            |       |          |          |          |                 |
|-----|------------|-------|----------|----------|----------|-----------------|
| 869 | ZFP69      | -1.31 | 6.90E-04 | 1.70E-03 | 178.96   | not significant |
| 870 | NQO2       | -1.31 | 2.34E-09 | 1.20E-08 | 731.28   | not significant |
| 871 | ATPIF1     | -1.31 | 1.58E-22 | 2.37E-21 | 2520.82  | not significant |
| 872 | GMNN       | -1.31 | 1.01E-28 | 2.24E-27 | 4268.97  | not significant |
| 873 | CTSK       | -1.31 | 9.94E-03 | 1.95E-02 | 73.30    | not significant |
| 874 | SCFD2      | -1.31 | 3.16E-10 | 1.77E-09 | 775.99   | not significant |
| 875 | MPHOSPH6   | -1.31 | 9.20E-19 | 1.08E-17 | 1877.51  | not significant |
| 876 | MALSU1     | -1.31 | 5.38E-12 | 3.56E-11 | 1026.32  | not significant |
| 877 | DEPDC1     | -1.31 | 1.90E-19 | 2.35E-18 | 2109.59  | not significant |
| 878 | CD63       | -1.31 | 7.32E-15 | 6.27E-14 | 2070.46  | not significant |
| 879 | MSN        | -1.31 | 6.29E-49 | 3.71E-47 | 35436.73 | not significant |
| 880 | TMEM99     | -1.31 | 1.27E-03 | 2.99E-03 | 152.18   | not significant |
| 881 | SGTB       | -1.30 | 7.89E-08 | 3.41E-07 | 596.67   | not significant |
| 882 | SRRT       | -1.30 | 1.42E-25 | 2.62E-24 | 8964.32  | not significant |
| 883 | GHRLOS     | -1.30 | 1.96E-02 | 3.60E-02 | 48.91    | not significant |
| 884 | C2orf43    | -1.30 | 2.12E-19 | 2.60E-18 | 1996.70  | not significant |
| 885 | KIAA2022   | -1.30 | 2.72E-02 | 4.85E-02 | 28.17    | not significant |
| 886 | BMS1P20    | -1.30 | 3.74E-10 | 2.07E-09 | 771.43   | not significant |
| 887 | CCDC92     | -1.30 | 2.17E-14 | 1.78E-13 | 1400.31  | not significant |
| 888 | NOP58      | -1.30 | 2.38E-28 | 5.21E-27 | 5628.08  | not significant |
| 889 | GTF2A2     | -1.30 | 3.26E-15 | 2.87E-14 | 1458.18  | not significant |
| 890 | CLYBL      | -1.30 | 3.60E-04 | 9.36E-04 | 196.16   | not significant |
| 891 | MIEN1      | -1.30 | 1.54E-17 | 1.64E-16 | 1729.38  | not significant |
| 892 | EIF2S2     | -1.30 | 1.19E-24 | 2.06E-23 | 5921.81  | not significant |
| 893 | ACAD10     | -1.30 | 1.05E-10 | 6.16E-10 | 1002.83  | not significant |
| 894 | MAGOHB     | -1.30 | 1.85E-15 | 1.66E-14 | 1731.71  | not significant |
| 895 | EXOSC8     | -1.30 | 2.48E-17 | 2.59E-16 | 1662.21  | not significant |
| 896 | PSMD2      | -1.30 | 2.07E-31 | 5.45E-30 | 7637.05  | not significant |
| 897 | FERMT3     | -1.30 | 3.16E-26 | 6.03E-25 | 5941.30  | not significant |
| 898 | HNRNPC     | -1.30 | 1.24E-26 | 2.45E-25 | 22491.60 | not significant |
| 899 | C7orf61    | -1.30 | 2.89E-02 | 5.11E-02 | 25.57    | not significant |
| 900 | IMP4       | -1.30 | 2.50E-16 | 2.41E-15 | 1628.87  | not significant |
| 901 | NTMT1      | -1.30 | 6.30E-09 | 3.08E-08 | 684.86   | not significant |
| 902 | SLC29A1    | -1.30 | 1.62E-34 | 5.28E-33 | 7840.58  | not significant |
| 903 | SPATA24    | -1.30 | 2.36E-02 | 4.25E-02 | 38.48    | not significant |
| 904 | SESN1      | -1.30 | 1.55E-08 | 7.22E-08 | 659.83   | not significant |
| 905 | GRN        | -1.30 | 1.81E-07 | 7.48E-07 | 606.36   | not significant |
| 906 | BCAT1      | -1.30 | 7.51E-23 | 1.15E-21 | 2867.81  | not significant |
| 907 | COQ5       | -1.30 | 7.64E-09 | 3.71E-08 | 783.10   | not significant |
| 908 | SNTA1      | -1.30 | 6.71E-08 | 2.93E-07 | 557.58   | not significant |
| 909 | MRPL35     | -1.30 | 1.08E-16 | 1.08E-15 | 1848.48  | not significant |
| 910 | DMD        | -1.30 | 2.15E-03 | 4.84E-03 | 159.27   | not significant |
| 911 | HN1        | -1.30 | 2.20E-26 | 4.24E-25 | 8233.98  | not significant |
| 912 | SETD7      | -1.30 | 3.89E-14 | 3.11E-13 | 1311.70  | not significant |
| 913 | PSME4      | -1.30 | 4.06E-17 | 4.18E-16 | 3291.63  | not significant |
| 914 | SCARB1     | -1.30 | 6.46E-14 | 5.07E-13 | 1369.50  | not significant |
| 915 | UMPS       | -1.30 | 1.68E-13 | 1.27E-12 | 1751.41  | not significant |
| 916 | MAPKAP1    | -1.30 | 1.41E-22 | 2.13E-21 | 3171.42  | not significant |
| 917 | CENPW      | -1.30 | 3.12E-04 | 8.20E-04 | 1096.46  | not significant |
| 918 | HNRNPM     | -1.30 | 4.70E-23 | 7.32E-22 | 16864.17 | not significant |
| 919 | MAK16      | -1.30 | 1.06E-21 | 1.50E-20 | 2483.45  | not significant |
| 920 | FAHD2B     | -1.30 | 3.45E-04 | 9.00E-04 | 220.27   | not significant |
| 921 | DNAJA1     | -1.30 | 6.26E-25 | 1.11E-23 | 12028.33 | not significant |
| 922 | HSD17B7    | -1.30 | 5.97E-06 | 2.04E-05 | 379.20   | not significant |
| 923 | PRIMPOL    | -1.30 | 1.22E-07 | 5.15E-07 | 561.76   | not significant |
| 924 | KPNA1      | -1.30 | 1.88E-25 | 3.44E-24 | 3433.63  | not significant |
| 925 | ATP5H      | -1.30 | 5.84E-19 | 6.92E-18 | 3800.59  | not significant |
| 926 | HSPBP1     | -1.30 | 2.85E-12 | 1.93E-11 | 1405.44  | not significant |
| 927 | RNFT1      | -1.30 | 8.11E-06 | 2.73E-05 | 366.87   | not significant |
| 928 | WDR1       | -1.30 | 1.39E-33 | 4.28E-32 | 13760.90 | not significant |
| 929 | MROH6      | -1.30 | 1.03E-05 | 3.40E-05 | 448.91   | not significant |
| 930 | UBE2N      | -1.30 | 9.44E-32 | 2.53E-30 | 8048.72  | not significant |
| 931 | GTF2E2     | -1.30 | 1.49E-15 | 1.35E-14 | 2175.41  | not significant |
| 932 | PPP6R1     | -1.30 | 7.26E-41 | 3.28E-39 | 17177.78 | not significant |
| 933 | PRR13      | -1.30 | 5.70E-23 | 8.82E-22 | 3216.58  | not significant |
| 934 | MRPL3      | -1.30 | 3.62E-26 | 6.87E-25 | 4362.67  | not significant |
| 935 | C3orf67    | -1.30 | 2.94E-02 | 5.18E-02 | 24.25    | not significant |
| 936 | MYO1B      | -1.30 | 1.90E-20 | 2.50E-19 | 2217.20  | not significant |
| 937 | TOP1MT     | -1.30 | 5.65E-19 | 6.71E-18 | 2113.34  | not significant |
| 938 | PUF60      | -1.30 | 1.19E-15 | 1.08E-14 | 1940.68  | not significant |
| 939 | TCAP       | -1.29 | 2.99E-02 | 5.26E-02 | 30.36    | not significant |
| 940 | JDP2       | -1.29 | 7.36E-04 | 1.80E-03 | 185.10   | not significant |
| 941 | ALOX5AP    | -1.29 | 2.46E-17 | 2.58E-16 | 1755.27  | not significant |
| 942 | ZBTB11-AS1 | -1.29 | 8.79E-03 | 1.75E-02 | 84.76    | not significant |
| 943 | UQCR11     | -1.29 | 3.99E-18 | 4.48E-17 | 3064.73  | not significant |
| 944 | DDC        | -1.29 | 2.69E-02 | 4.79E-02 | 14.45    | not significant |
| 945 | METTL8     | -1.29 | 3.57E-11 | 2.19E-10 | 978.19   | not significant |
| 946 | SSBP1      | -1.29 | 1.61E-16 | 1.58E-15 | 2627.16  | not significant |
| 947 | FAM118B    | -1.29 | 2.40E-09 | 1.22E-08 | 738.63   | not significant |
| 948 | PREB       | -1.29 | 3.08E-18 | 3.49E-17 | 2023.13  | not significant |
| 949 | CHRNA5     | -1.29 | 2.13E-07 | 8.76E-07 | 566.26   | not significant |
| 950 | PMM2       | -1.29 | 8.50E-20 | 1.08E-18 | 2586.29  | not significant |
| 951 | NUP37      | -1.29 | 1.94E-15 | 1.73E-14 | 2073.64  | not significant |
| 952 | TRMT1L     | -1.29 | 3.61E-11 | 2.22E-10 | 967.39   | not significant |
| 953 | PSMA6      | -1.29 | 4.12E-26 | 7.80E-25 | 7207.23  | not significant |
| 954 | NOP56      | -1.29 | 3.90E-29 | 8.97E-28 | 12144.70 | not significant |
| 955 | NDUFAB1    | -1.29 | 1.39E-18 | 1.61E-17 | 2527.49  | not significant |
| 956 | SPC25      | -1.29 | 2.96E-10 | 1.67E-09 | 899.87   | not significant |

|      |           |       |          |          |          |                 |
|------|-----------|-------|----------|----------|----------|-----------------|
| 957  | PRKACA    | -1.29 | 9.01E-24 | 1.48E-22 | 3704.50  | not significant |
| 958  | PSMB8     | -1.29 | 6.58E-16 | 6.12E-15 | 1963.17  | not significant |
| 959  | RAB30     | -1.29 | 1.32E-03 | 3.09E-03 | 162.55   | not significant |
| 960  | TAF2      | -1.29 | 1.33E-19 | 1.65E-18 | 2709.74  | not significant |
| 961  | PDIA4     | -1.29 | 6.92E-28 | 1.48E-26 | 6603.64  | not significant |
| 962  | DAD1      | -1.29 | 1.32E-16 | 1.31E-15 | 2184.26  | not significant |
| 963  | WDR12     | -1.29 | 5.06E-17 | 5.18E-16 | 2028.12  | not significant |
| 964  | ECI2      | -1.29 | 1.35E-16 | 1.33E-15 | 1752.24  | not significant |
| 965  | MRPL41    | -1.29 | 1.76E-06 | 6.45E-06 | 468.49   | not significant |
| 966  | NUDT5     | -1.29 | 6.14E-17 | 6.25E-16 | 2744.36  | not significant |
| 967  | POLR1C    | -1.29 | 2.72E-08 | 1.24E-07 | 666.53   | not significant |
| 968  | RGL1      | -1.29 | 4.82E-03 | 1.01E-02 | 117.20   | not significant |
| 969  | RFT1      | -1.29 | 7.39E-15 | 6.32E-14 | 1530.47  | not significant |
| 970  | MAFG-AS1  | -1.29 | 1.13E-02 | 2.19E-02 | 78.44    | not significant |
| 971  | ADORA2B   | -1.29 | 1.79E-04 | 4.93E-04 | 286.67   | not significant |
| 972  | CHAT      | -1.29 | 7.47E-03 | 1.51E-02 | 104.57   | not significant |
| 973  | SRP54     | -1.29 | 2.48E-22 | 3.66E-21 | 3112.21  | not significant |
| 974  | NOP10     | -1.29 | 1.81E-18 | 2.09E-17 | 2097.99  | not significant |
| 975  | ZNF878    | -1.29 | 2.77E-02 | 4.91E-02 | 35.59    | not significant |
| 976  | HNRNPD    | -1.29 | 1.17E-23 | 1.90E-22 | 22672.99 | not significant |
| 977  | AMMECR1   | -1.29 | 1.47E-06 | 5.48E-06 | 462.06   | not significant |
| 978  | RIOK1     | -1.29 | 9.53E-21 | 1.27E-19 | 2449.26  | not significant |
| 979  | LINC00176 | -1.29 | 2.42E-02 | 4.36E-02 | 44.02    | not significant |
| 980  | RPF1      | -1.29 | 1.09E-15 | 9.98E-15 | 2135.29  | not significant |
| 981  | CSTF3     | -1.29 | 9.62E-15 | 8.14E-14 | 1862.25  | not significant |
| 982  | RGS6      | -1.29 | 4.76E-03 | 1.00E-02 | 115.64   | not significant |
| 983  | WDR77     | -1.29 | 1.18E-23 | 1.92E-22 | 3577.08  | not significant |
| 984  | BCL7C     | -1.29 | 4.23E-08 | 1.89E-07 | 905.18   | not significant |
| 985  | CCNF      | -1.29 | 6.99E-25 | 1.23E-23 | 4088.46  | not significant |
| 986  | CBWD2     | -1.29 | 5.02E-06 | 1.73E-05 | 499.39   | not significant |
| 987  | FDPS      | -1.29 | 5.44E-26 | 1.02E-24 | 5869.99  | not significant |
| 988  | PCK2      | -1.29 | 1.55E-07 | 6.49E-07 | 706.05   | not significant |
| 989  | RAP1A     | -1.29 | 4.76E-15 | 4.13E-14 | 2189.35  | not significant |
| 990  | PNP       | -1.29 | 8.79E-21 | 1.18E-19 | 3589.76  | not significant |
| 991  | POLR2B    | -1.29 | 8.43E-34 | 2.63E-32 | 7693.61  | not significant |
| 992  | TIMM17A   | -1.29 | 5.97E-05 | 1.78E-04 | 2029.79  | not significant |
| 993  | EPB41L2   | -1.29 | 1.19E-30 | 2.96E-29 | 5056.30  | not significant |
| 994  | PSMD7     | -1.29 | 1.80E-23 | 2.89E-22 | 4261.17  | not significant |
| 995  | RNH1      | -1.29 | 7.28E-19 | 8.56E-18 | 2355.31  | not significant |
| 996  | DDI2      | -1.29 | 5.92E-06 | 2.03E-05 | 459.63   | not significant |
| 997  | ZNHIT1    | -1.29 | 1.59E-12 | 1.10E-11 | 1602.72  | not significant |
| 998  | TIMM22    | -1.29 | 3.78E-09 | 1.89E-08 | 808.55   | not significant |
| 999  | NCL       | -1.29 | 1.33E-23 | 2.15E-22 | 53082.53 | not significant |
| 1000 | COX7A2    | -1.29 | 6.83E-20 | 8.67E-19 | 4092.39  | not significant |
| 1001 | LEPR      | -1.29 | 1.64E-02 | 3.07E-02 | 63.91    | not significant |
| 1002 | TMEM14A   | -1.29 | 4.96E-08 | 2.20E-07 | 704.86   | not significant |
| 1003 | PTP4A2    | -1.28 | 1.15E-37 | 4.62E-36 | 46473.95 | not significant |
| 1004 | AQP3      | -1.28 | 3.01E-23 | 4.76E-22 | 3784.29  | not significant |
| 1005 | NUP35     | -1.28 | 2.04E-09 | 1.05E-08 | 844.90   | not significant |
| 1006 | CYBA      | -1.28 | 1.92E-14 | 1.57E-13 | 2145.04  | not significant |
| 1007 | DZIP3     | -1.28 | 3.60E-09 | 1.80E-08 | 766.47   | not significant |
| 1008 | FASTKD3   | -1.28 | 4.64E-07 | 1.83E-06 | 579.41   | not significant |
| 1009 | FGD2      | -1.28 | 1.92E-02 | 3.53E-02 | 59.53    | not significant |
| 1010 | ERCC4     | -1.28 | 8.95E-08 | 3.84E-07 | 682.24   | not significant |
| 1011 | MORF4L2   | -1.28 | 9.54E-28 | 2.02E-26 | 4856.17  | not significant |
| 1012 | MPV17L2   | -1.28 | 1.03E-08 | 4.95E-08 | 832.28   | not significant |
| 1013 | NDUFA7    | -1.28 | 2.35E-12 | 1.60E-11 | 1433.54  | not significant |
| 1014 | E2F5      | -1.28 | 5.44E-09 | 2.67E-08 | 752.85   | not significant |
| 1015 | TCEB2     | -1.28 | 8.93E-15 | 7.57E-14 | 2262.06  | not significant |
| 1016 | TAGAP     | -1.28 | 1.78E-07 | 7.39E-07 | 632.13   | not significant |
| 1017 | CNOT1     | -1.28 | 2.62E-27 | 5.40E-26 | 16598.82 | not significant |
| 1018 | CARS2     | -1.28 | 3.04E-12 | 2.06E-11 | 1458.55  | not significant |
| 1019 | ROGDI     | -1.28 | 7.43E-03 | 1.50E-02 | 100.51   | not significant |
| 1020 | CDCA8     | -1.28 | 9.67E-29 | 2.16E-27 | 5048.43  | not significant |
| 1021 | EGLN3     | -1.28 | 1.90E-04 | 5.20E-04 | 284.19   | not significant |
| 1022 | ATP5I     | -1.28 | 5.35E-15 | 4.62E-14 | 1691.49  | not significant |
| 1023 | TMEM205   | -1.28 | 1.25E-07 | 5.26E-07 | 642.86   | not significant |
| 1024 | TTC4      | -1.28 | 3.01E-02 | 5.29E-02 | 18.14    | not significant |
| 1025 | POLR2E    | -1.28 | 8.24E-25 | 1.44E-23 | 6571.59  | not significant |
| 1026 | AP1B1     | -1.28 | 5.06E-30 | 1.22E-28 | 5654.90  | not significant |
| 1027 | PSMC1     | -1.28 | 1.17E-08 | 5.58E-08 | 758.22   | not significant |
| 1028 | CDC42     | -1.28 | 1.79E-27 | 3.72E-26 | 7378.22  | not significant |
| 1029 | SRR       | -1.28 | 4.60E-07 | 1.82E-06 | 587.34   | not significant |
| 1030 | RAB29     | -1.28 | 3.80E-09 | 1.90E-08 | 846.71   | not significant |
| 1031 | CENPA     | -1.28 | 5.17E-16 | 4.86E-15 | 2044.02  | not significant |
| 1032 | EIF4G1    | -1.28 | 1.86E-28 | 4.08E-27 | 17443.74 | not significant |
| 1033 | C12orf75  | -1.28 | 2.01E-18 | 2.30E-17 | 4069.23  | not significant |
| 1034 | KIF21B    | -1.28 | 1.94E-23 | 3.09E-22 | 6347.72  | not significant |
| 1035 | DDX1      | -1.28 | 5.67E-23 | 8.78E-22 | 4102.39  | not significant |
| 1036 | PER1      | -1.28 | 3.20E-08 | 1.45E-07 | 692.74   | not significant |
| 1037 | ARG2      | -1.28 | 2.30E-02 | 4.17E-02 | 50.43    | not significant |
| 1038 | AP1S3     | -1.28 | 3.14E-02 | 5.51E-02 | 17.76    | not significant |
| 1039 | CLPP      | -1.28 | 6.18E-19 | 7.32E-18 | 2499.57  | not significant |
| 1040 | WWP1      | -1.28 | 1.50E-15 | 1.36E-14 | 1737.14  | not significant |
| 1041 | DNMT3B    | -1.28 | 3.39E-16 | 3.21E-15 | 2427.47  | not significant |
| 1042 | MMAB      | -1.28 | 1.05E-14 | 8.86E-14 | 1534.42  | not significant |
| 1043 | DPP9      | -1.28 | 4.37E-22 | 6.38E-21 | 3111.13  | not significant |
| 1044 | DENND4A   | -1.28 | 2.58E-07 | 1.05E-06 | 615.30   | not significant |

|      |              |       |          |          |          |                 |
|------|--------------|-------|----------|----------|----------|-----------------|
| 1045 | CUL3         | -1.28 | 3.25E-25 | 5.90E-24 | 3742.86  | not significant |
| 1046 | OGDH         | -1.28 | 2.62E-29 | 6.08E-28 | 4681.02  | not significant |
| 1047 | IFI6         | -1.28 | 8.15E-12 | 5.32E-11 | 1472.92  | not significant |
| 1048 | LSM4         | -1.28 | 1.61E-22 | 2.40E-21 | 9210.83  | not significant |
| 1049 | KIF4A        | -1.28 | 7.84E-22 | 1.12E-20 | 3280.57  | not significant |
| 1050 | SEPHS2       | -1.28 | 3.80E-18 | 4.28E-17 | 2991.29  | not significant |
| 1051 | SSBP4        | -1.28 | 1.27E-19 | 1.58E-18 | 3822.07  | not significant |
| 1052 | API5         | -1.28 | 7.21E-32 | 1.94E-30 | 6753.53  | not significant |
| 1053 | HOXB2        | -1.28 | 1.02E-02 | 2.00E-02 | 87.16    | not significant |
| 1054 | RAG1         | -1.28 | 8.22E-03 | 1.64E-02 | 99.47    | not significant |
| 1055 | AK2          | -1.28 | 7.60E-36 | 2.71E-34 | 9043.96  | not significant |
| 1056 | MICAL3       | -1.28 | 6.26E-08 | 2.74E-07 | 751.65   | not significant |
| 1057 | SLC6A20      | -1.28 | 6.94E-04 | 1.71E-03 | 234.96   | not significant |
| 1058 | CETN3        | -1.28 | 3.81E-08 | 1.71E-07 | 862.71   | not significant |
| 1059 | ATP1A1       | -1.28 | 1.35E-38 | 5.61E-37 | 18979.43 | not significant |
| 1060 | DUS2         | -1.28 | 5.77E-06 | 1.98E-05 | 450.69   | not significant |
| 1061 | PGAM5        | -1.28 | 1.77E-26 | 3.44E-25 | 4415.95  | not significant |
| 1062 | ATP5L        | -1.28 | 5.83E-16 | 5.45E-15 | 1936.02  | not significant |
| 1063 | TFB1M        | -1.28 | 3.67E-05 | 1.13E-04 | 365.02   | not significant |
| 1064 | AMICA1       | -1.28 | 3.34E-02 | 5.82E-02 | 28.11    | not significant |
| 1065 | LSAMP        | -1.28 | 3.08E-04 | 8.10E-04 | 271.47   | not significant |
| 1066 | FITM2        | -1.28 | 3.40E-02 | 5.89E-02 | 23.86    | not significant |
| 1067 | PSMD14       | -1.28 | 1.57E-20 | 2.07E-19 | 3847.78  | not significant |
| 1068 | TOP1P1       | -1.28 | 2.24E-02 | 4.06E-02 | 55.89    | not significant |
| 1069 | LDLR         | -1.28 | 1.21E-18 | 1.42E-17 | 2495.32  | not significant |
| 1070 | FSD1         | -1.28 | 2.69E-04 | 7.17E-04 | 262.65   | not significant |
| 1071 | LPHN1        | -1.28 | 5.76E-06 | 1.98E-05 | 439.47   | not significant |
| 1072 | PCDH12       | -1.28 | 3.39E-02 | 5.88E-02 | 23.77    | not significant |
| 1073 | ACKR3        | -1.28 | 8.26E-03 | 1.65E-02 | 99.53    | not significant |
| 1074 | SPRED1       | -1.28 | 7.13E-04 | 1.75E-03 | 247.79   | not significant |
| 1075 | ATP5J        | -1.28 | 4.87E-14 | 3.86E-13 | 3235.31  | not significant |
| 1076 | NIFK         | -1.28 | 9.98E-15 | 8.43E-14 | 2311.12  | not significant |
| 1077 | GEMIN7       | -1.28 | 5.22E-06 | 1.80E-05 | 442.63   | not significant |
| 1078 | NUP88        | -1.28 | 1.73E-17 | 1.84E-16 | 2267.68  | not significant |
| 1079 | PDSS1        | -1.28 | 2.96E-09 | 1.50E-08 | 815.88   | not significant |
| 1080 | NUDC         | -1.28 | 6.27E-21 | 8.53E-20 | 6564.04  | not significant |
| 1081 | ZBTB8OS      | -1.28 | 1.73E-06 | 6.38E-06 | 492.62   | not significant |
| 1082 | ADCK1        | -1.28 | 1.60E-04 | 4.44E-04 | 285.42   | not significant |
| 1083 | CCDC58       | -1.28 | 8.04E-08 | 3.47E-07 | 691.62   | not significant |
| 1084 | BTN2A3P      | -1.28 | 1.81E-02 | 3.36E-02 | 67.38    | not significant |
| 1085 | LOC101928766 | -1.28 | 1.15E-02 | 2.23E-02 | 89.50    | not significant |
| 1086 | TNS4         | -1.28 | 9.56E-03 | 1.88E-02 | 96.57    | not significant |
| 1087 | FAR2         | -1.28 | 1.36E-16 | 1.34E-15 | 1963.99  | not significant |
| 1088 | SKIV2L2      | -1.28 | 6.37E-22 | 9.21E-21 | 3351.21  | not significant |
| 1089 | KBTBD3       | -1.28 | 1.81E-02 | 3.36E-02 | 71.38    | not significant |
| 1090 | CGN          | -1.28 | 9.95E-06 | 3.30E-05 | 413.09   | not significant |
| 1091 | POP1         | -1.28 | 2.30E-09 | 1.17E-08 | 1084.57  | not significant |
| 1092 | PRPF19       | -1.28 | 1.33E-31 | 3.52E-30 | 9674.84  | not significant |
| 1093 | EBAG9        | -1.28 | 2.57E-11 | 1.59E-10 | 1442.03  | not significant |
| 1094 | GNG5         | -1.28 | 4.81E-22 | 6.98E-21 | 4921.06  | not significant |
| 1095 | TRA2B        | -1.28 | 1.34E-29 | 3.19E-28 | 13489.24 | not significant |
| 1096 | TIMM10       | -1.28 | 1.13E-09 | 5.93E-09 | 872.24   | not significant |
| 1097 | PSMD6        | -1.28 | 1.65E-17 | 1.75E-16 | 2445.44  | not significant |
| 1098 | CXorf40A     | -1.28 | 2.99E-02 | 5.26E-02 | 41.65    | not significant |
| 1099 | LRRFIP1      | -1.28 | 1.05E-21 | 1.50E-20 | 6249.30  | not significant |
| 1100 | C21orf59     | -1.27 | 1.07E-13 | 8.26E-13 | 1933.87  | not significant |
| 1101 | DOK1         | -1.27 | 1.71E-05 | 5.49E-05 | 383.30   | not significant |
| 1102 | USP44        | -1.27 | 1.07E-10 | 6.25E-10 | 1171.47  | not significant |
| 1103 | SMC4         | -1.27 | 3.62E-21 | 4.99E-20 | 14740.86 | not significant |
| 1104 | GLRX2        | -1.27 | 2.06E-04 | 5.61E-04 | 276.83   | not significant |
| 1105 | BPGM         | -1.27 | 1.14E-07 | 4.85E-07 | 688.94   | not significant |
| 1106 | MAGI3        | -1.27 | 2.50E-04 | 6.71E-04 | 262.89   | not significant |
| 1107 | VDAC1        | -1.27 | 2.18E-33 | 6.56E-32 | 8911.44  | not significant |
| 1108 | PKP4         | -1.27 | 4.56E-18 | 5.09E-17 | 2205.20  | not significant |
| 1109 | DYRK2        | -1.27 | 4.09E-15 | 3.57E-14 | 1819.56  | not significant |
| 1110 | C6orf203     | -1.27 | 8.95E-03 | 1.77E-02 | 102.48   | not significant |
| 1111 | KIF18A       | -1.27 | 3.55E-13 | 2.60E-12 | 1522.78  | not significant |
| 1112 | C7orf50      | -1.27 | 3.84E-09 | 1.92E-08 | 919.94   | not significant |
| 1113 | DPP3         | -1.27 | 1.02E-21 | 1.44E-20 | 3220.30  | not significant |
| 1114 | SIK1         | -1.27 | 2.07E-03 | 4.66E-03 | 172.90   | not significant |
| 1115 | C9orf3       | -1.27 | 6.67E-03 | 1.36E-02 | 109.73   | not significant |
| 1116 | LYPLA2       | -1.27 | 1.32E-14 | 1.10E-13 | 1799.85  | not significant |
| 1117 | DCAF6        | -1.27 | 6.82E-14 | 5.33E-13 | 1634.77  | not significant |
| 1118 | INTS9        | -1.27 | 6.78E-13 | 4.85E-12 | 1555.11  | not significant |
| 1119 | METTL2B      | -1.27 | 1.05E-08 | 5.02E-08 | 860.80   | not significant |
| 1120 | IFI44L       | -1.27 | 2.08E-02 | 3.79E-02 | 10.32    | not significant |
| 1121 | WDR3         | -1.27 | 2.73E-21 | 3.77E-20 | 3183.94  | not significant |
| 1122 | TIMM50       | -1.27 | 1.20E-14 | 1.00E-13 | 1934.31  | not significant |
| 1123 | ACACA        | -1.27 | 2.09E-15 | 1.86E-14 | 4643.95  | not significant |
| 1124 | MPHOSPH10    | -1.27 | 2.37E-13 | 1.77E-12 | 1939.60  | not significant |
| 1125 | TTLL11       | -1.27 | 9.27E-03 | 1.83E-02 | 99.29    | not significant |
| 1126 | TSPAN17      | -1.27 | 5.66E-10 | 3.09E-09 | 1003.53  | not significant |
| 1127 | CLUH         | -1.27 | 2.47E-22 | 3.66E-21 | 4318.78  | not significant |
| 1128 | FTSJ3        | -1.27 | 3.68E-25 | 6.64E-24 | 4850.04  | not significant |
| 1129 | HK1          | -1.27 | 5.88E-24 | 9.78E-23 | 3707.59  | not significant |
| 1130 | PDCD5        | -1.27 | 8.95E-11 | 5.28E-10 | 1376.69  | not significant |
| 1131 | NDUFA8       | -1.27 | 5.65E-09 | 2.77E-08 | 971.75   | not significant |
| 1132 | LOC399815    | -1.27 | 2.93E-03 | 6.41E-03 | 162.09   | not significant |

|      |           |       |          |          |          |                 |
|------|-----------|-------|----------|----------|----------|-----------------|
| 1133 | PLEKHB2   | -1.27 | 2.79E-29 | 6.45E-28 | 5970.55  | not significant |
| 1134 | BIRC3     | -1.27 | 3.78E-08 | 1.70E-07 | 819.69   | not significant |
| 1135 | TIPIN     | -1.27 | 3.21E-07 | 1.29E-06 | 698.01   | not significant |
| 1136 | DNAJB5    | -1.27 | 5.61E-05 | 1.68E-04 | 356.00   | not significant |
| 1137 | AGER      | -1.27 | 1.30E-02 | 2.48E-02 | 86.31    | not significant |
| 1138 | INPP5D    | -1.27 | 3.39E-33 | 1.00E-31 | 8158.17  | not significant |
| 1139 | MPV17     | -1.27 | 1.44E-09 | 7.49E-09 | 1026.93  | not significant |
| 1140 | B3GNTL1   | -1.27 | 2.48E-05 | 7.79E-05 | 419.54   | not significant |
| 1141 | ALG2      | -1.27 | 2.05E-06 | 7.46E-06 | 520.04   | not significant |
| 1142 | HIBCH     | -1.27 | 1.13E-08 | 5.37E-08 | 882.02   | not significant |
| 1143 | NGFRAP1   | -1.27 | 4.15E-06 | 1.45E-05 | 493.51   | not significant |
| 1144 | AK4       | -1.27 | 5.05E-04 | 1.28E-03 | 251.84   | not significant |
| 1145 | TACC3     | -1.27 | 9.83E-33 | 2.84E-31 | 8692.41  | not significant |
| 1146 | NDRG1     | -1.27 | 1.88E-18 | 2.16E-17 | 2635.12  | not significant |
| 1147 | JMJD6     | -1.27 | 1.30E-11 | 8.31E-11 | 1254.59  | not significant |
| 1148 | NAA10     | -1.27 | 8.27E-13 | 5.88E-12 | 1388.58  | not significant |
| 1149 | METTL1    | -1.27 | 4.44E-06 | 1.55E-05 | 585.04   | not significant |
| 1150 | POLR1B    | -1.27 | 8.83E-16 | 8.13E-15 | 2141.91  | not significant |
| 1151 | ONECUT2   | -1.27 | 8.95E-03 | 1.77E-02 | 106.31   | not significant |
| 1152 | GBP1      | -1.27 | 2.28E-15 | 2.03E-14 | 1868.95  | not significant |
| 1153 | GLRX5     | -1.27 | 2.80E-16 | 2.68E-15 | 2513.96  | not significant |
| 1154 | OAS3      | -1.27 | 1.27E-22 | 1.92E-21 | 5390.85  | not significant |
| 1155 | LIPT2     | -1.27 | 1.71E-02 | 3.19E-02 | 74.60    | not significant |
| 1156 | CCDC59    | -1.27 | 4.29E-14 | 3.42E-13 | 1642.33  | not significant |
| 1157 | ACTR2     | -1.27 | 7.71E-21 | 1.04E-19 | 20047.30 | not significant |
| 1158 | TRMT61A   | -1.27 | 4.28E-09 | 2.13E-08 | 933.00   | not significant |
| 1159 | IL17RE    | -1.27 | 6.98E-03 | 1.42E-02 | 114.13   | not significant |
| 1160 | PTRH2     | -1.27 | 4.45E-09 | 2.21E-08 | 898.38   | not significant |
| 1161 | SH2D2A    | -1.27 | 5.77E-04 | 1.44E-03 | 234.25   | not significant |
| 1162 | STOM      | -1.27 | 6.02E-08 | 2.64E-07 | 788.92   | not significant |
| 1163 | WDR46     | -1.27 | 7.53E-09 | 3.66E-08 | 868.93   | not significant |
| 1164 | HSPH1     | -1.27 | 3.10E-32 | 8.58E-31 | 16077.66 | not significant |
| 1165 | DDX18     | -1.27 | 4.56E-26 | 8.59E-25 | 5248.36  | not significant |
| 1166 | COG2      | -1.27 | 9.94E-12 | 6.43E-11 | 1297.43  | not significant |
| 1167 | UQCRFS1   | -1.27 | 3.46E-15 | 3.05E-14 | 2707.65  | not significant |
| 1168 | SRP14     | -1.27 | 2.47E-22 | 3.66E-21 | 5512.55  | not significant |
| 1169 | SLC41A2   | -1.27 | 3.27E-03 | 7.11E-03 | 169.76   | not significant |
| 1170 | PSMG1     | -1.27 | 6.65E-14 | 5.20E-13 | 1690.95  | not significant |
| 1171 | ZDHHC3    | -1.27 | 8.66E-18 | 9.41E-17 | 2494.21  | not significant |
| 1172 | MST4      | -1.27 | 1.78E-29 | 4.18E-28 | 5908.19  | not significant |
| 1173 | DDX27     | -1.27 | 2.89E-15 | 2.55E-14 | 3397.61  | not significant |
| 1174 | MBD2      | -1.27 | 2.65E-22 | 3.89E-21 | 3466.04  | not significant |
| 1175 | C12orf4   | -1.26 | 4.94E-08 | 2.20E-07 | 757.14   | not significant |
| 1176 | C1orf216  | -1.26 | 6.54E-07 | 2.53E-06 | 670.41   | not significant |
| 1177 | LRIG1     | -1.26 | 5.65E-09 | 2.77E-08 | 859.73   | not significant |
| 1178 | HDAC3     | -1.26 | 9.99E-20 | 1.25E-18 | 2747.95  | not significant |
| 1179 | FAM136A   | -1.26 | 1.49E-16 | 1.47E-15 | 3572.63  | not significant |
| 1180 | BAK1      | -1.26 | 7.36E-10 | 3.95E-09 | 1276.90  | not significant |
| 1181 | RAE1      | -1.26 | 1.03E-16 | 1.03E-15 | 2646.73  | not significant |
| 1182 | SLC39A14  | -1.26 | 1.84E-19 | 2.28E-18 | 3362.88  | not significant |
| 1183 | HNRNPK    | -1.26 | 8.28E-35 | 2.75E-33 | 35571.09 | not significant |
| 1184 | GART      | -1.26 | 1.42E-26 | 2.78E-25 | 5394.59  | not significant |
| 1185 | SLC25A20  | -1.26 | 1.34E-08 | 6.34E-08 | 1137.39  | not significant |
| 1186 | PAG1      | -1.26 | 3.88E-24 | 6.53E-23 | 5133.60  | not significant |
| 1187 | ADRM1     | -1.26 | 1.25E-14 | 1.04E-13 | 2626.57  | not significant |
| 1188 | POLD2     | -1.26 | 4.38E-28 | 9.45E-27 | 6807.16  | not significant |
| 1189 | COPB2     | -1.26 | 3.91E-22 | 5.70E-21 | 4883.49  | not significant |
| 1190 | ABCD1     | -1.26 | 8.05E-03 | 1.61E-02 | 114.97   | not significant |
| 1191 | KIAA0020  | -1.26 | 2.83E-16 | 2.70E-15 | 2363.88  | not significant |
| 1192 | CCT7      | -1.26 | 8.84E-21 | 1.19E-19 | 15504.90 | not significant |
| 1193 | KIF20B    | -1.26 | 1.34E-19 | 1.66E-18 | 3996.88  | not significant |
| 1194 | PDLIM7    | -1.26 | 2.44E-04 | 6.54E-04 | 299.15   | not significant |
| 1195 | C11orf45  | -1.26 | 1.28E-04 | 3.60E-04 | 326.46   | not significant |
| 1196 | S100P     | -1.26 | 3.64E-02 | 6.27E-02 | 32.50    | not significant |
| 1197 | DCUN1D5   | -1.26 | 6.06E-14 | 4.77E-13 | 1718.50  | not significant |
| 1198 | MRPL12    | -1.26 | 7.63E-16 | 7.07E-15 | 3500.29  | not significant |
| 1199 | FAM96B    | -1.26 | 8.67E-13 | 6.16E-12 | 2039.81  | not significant |
| 1200 | HUWE1     | -1.26 | 1.59E-04 | 4.40E-04 | 4911.94  | not significant |
| 1201 | TNKS1BP1  | -1.26 | 3.98E-06 | 1.40E-05 | 592.91   | not significant |
| 1202 | CSTF2     | -1.26 | 1.35E-09 | 7.04E-09 | 1043.35  | not significant |
| 1203 | FABP5     | -1.26 | 5.08E-07 | 1.99E-06 | 807.10   | not significant |
| 1204 | MTIF3     | -1.26 | 8.33E-08 | 3.59E-07 | 764.20   | not significant |
| 1205 | GALNT6    | -1.26 | 1.57E-12 | 1.09E-11 | 1641.37  | not significant |
| 1206 | YBX3      | -1.26 | 8.20E-17 | 8.22E-16 | 2781.12  | not significant |
| 1207 | MAPKAPK3  | -1.26 | 1.01E-28 | 2.25E-27 | 6867.80  | not significant |
| 1208 | NDUFB3    | -1.26 | 4.94E-12 | 3.29E-11 | 1527.16  | not significant |
| 1209 | NOP2      | -1.26 | 1.49E-15 | 1.34E-14 | 2868.89  | not significant |
| 1210 | PROSC     | -1.26 | 2.70E-21 | 3.74E-20 | 5253.16  | not significant |
| 1211 | TNFAIP8L1 | -1.26 | 1.22E-07 | 5.16E-07 | 702.48   | not significant |
| 1212 | PDAP1     | -1.26 | 6.60E-18 | 7.25E-17 | 5212.59  | not significant |
| 1213 | GNL2      | -1.26 | 7.07E-14 | 5.52E-13 | 2402.18  | not significant |
| 1214 | HOMER1    | -1.26 | 1.42E-12 | 9.89E-12 | 1455.47  | not significant |
| 1215 | TRAP1     | -1.26 | 6.03E-15 | 5.20E-14 | 2532.61  | not significant |
| 1216 | SCO1      | -1.26 | 4.95E-11 | 2.99E-10 | 1271.75  | not significant |
| 1217 | DHRS4-AS1 | -1.26 | 9.47E-09 | 4.56E-08 | 856.96   | not significant |
| 1218 | EPHA1     | -1.26 | 2.75E-02 | 4.89E-02 | 12.42    | not significant |
| 1219 | KPNB1     | -1.26 | 1.13E-37 | 4.55E-36 | 22819.78 | not significant |
| 1220 | NUP93     | -1.26 | 9.68E-22 | 1.38E-20 | 3688.29  | not significant |

|      |              |       |          |          |          |                 |
|------|--------------|-------|----------|----------|----------|-----------------|
| 1221 | PSMB6        | -1.26 | 1.36E-15 | 1.24E-14 | 2674.27  | not significant |
| 1222 | LOC100996324 | -1.26 | 1.39E-03 | 3.25E-03 | 211.34   | not significant |
| 1223 | MLLT3        | -1.26 | 3.12E-15 | 2.75E-14 | 2117.74  | not significant |
| 1224 | MTFMT        | -1.26 | 4.84E-05 | 1.46E-04 | 455.40   | not significant |
| 1225 | HIST1H1D     | -1.26 | 3.85E-02 | 6.58E-02 | 34.19    | not significant |
| 1226 | RAB1B        | -1.26 | 5.67E-20 | 7.23E-19 | 6615.22  | not significant |
| 1227 | EIF5B        | -1.26 | 6.89E-23 | 1.06E-21 | 6252.46  | not significant |
| 1228 | MINOS1       | -1.26 | 9.63E-08 | 4.12E-07 | 856.03   | not significant |
| 1229 | ATPAF1       | -1.26 | 1.47E-16 | 1.45E-15 | 2241.99  | not significant |
| 1230 | KPNA3        | -1.26 | 2.87E-23 | 4.54E-22 | 4072.69  | not significant |
| 1231 | FOXRED1      | -1.26 | 1.42E-11 | 9.01E-11 | 1309.60  | not significant |
| 1232 | SERF2        | -1.26 | 3.73E-23 | 5.85E-22 | 4688.30  | not significant |
| 1233 | USP54        | -1.26 | 4.64E-05 | 1.40E-04 | 431.88   | not significant |
| 1234 | CHRNA9       | -1.26 | 3.39E-03 | 7.36E-03 | 193.45   | not significant |
| 1235 | IQSEC1       | -1.26 | 2.20E-16 | 2.13E-15 | 2298.99  | not significant |
| 1236 | PMPCA        | -1.26 | 5.01E-13 | 3.62E-12 | 1596.19  | not significant |
| 1237 | TWF1         | -1.26 | 3.16E-07 | 1.27E-06 | 687.85   | not significant |
| 1238 | RABEPK       | -1.26 | 9.98E-08 | 4.27E-07 | 814.60   | not significant |
| 1239 | LOC100130899 | -1.26 | 3.77E-02 | 6.46E-02 | 34.55    | not significant |
| 1240 | VCP          | -1.26 | 3.72E-32 | 1.02E-30 | 12978.57 | not significant |
| 1241 | HEATR2       | -1.26 | 4.24E-15 | 3.70E-14 | 1991.99  | not significant |
| 1242 | LINC00260    | -1.26 | 3.74E-02 | 6.42E-02 | 19.06    | not significant |
| 1243 | DDX10        | -1.26 | 7.29E-13 | 5.20E-12 | 1662.30  | not significant |
| 1244 | LSM3         | -1.26 | 1.33E-12 | 9.30E-12 | 2493.87  | not significant |
| 1245 | SERTAD1      | -1.26 | 1.46E-02 | 2.76E-02 | 92.90    | not significant |
| 1246 | MTRF1L       | -1.26 | 1.45E-03 | 3.37E-03 | 207.91   | not significant |
| 1247 | STAT6        | -1.26 | 6.81E-21 | 9.22E-20 | 5037.43  | not significant |
| 1248 | SLCO3A1      | -1.26 | 7.81E-03 | 1.57E-02 | 123.48   | not significant |
| 1249 | SIL1         | -1.26 | 6.38E-05 | 1.89E-04 | 391.80   | not significant |
| 1250 | UTP3         | -1.26 | 4.49E-11 | 2.73E-10 | 2273.71  | not significant |
| 1251 | DNAJC2       | -1.26 | 3.78E-15 | 3.32E-14 | 2175.62  | not significant |
| 1252 | ZCRB1        | -1.26 | 2.24E-17 | 2.37E-16 | 3448.02  | not significant |
| 1253 | AEN          | -1.26 | 1.86E-11 | 1.16E-10 | 1358.99  | not significant |
| 1254 | CMSS1        | -1.25 | 2.85E-13 | 2.11E-12 | 1796.11  | not significant |
| 1255 | UBAC2-AS1    | -1.25 | 3.88E-02 | 6.62E-02 | 34.47    | not significant |
| 1256 | EXT1         | -1.25 | 2.51E-05 | 7.87E-05 | 430.72   | not significant |
| 1257 | ABCD3        | -1.25 | 1.32E-16 | 1.31E-15 | 3672.70  | not significant |
| 1258 | TACO1        | -1.25 | 3.51E-10 | 1.95E-09 | 1173.84  | not significant |
| 1259 | SLC1A5       | -1.25 | 4.40E-25 | 7.89E-24 | 6399.25  | not significant |
| 1260 | FAM173B      | -1.25 | 7.61E-05 | 2.23E-04 | 400.88   | not significant |
| 1261 | TRMT5        | -1.25 | 1.99E-07 | 8.21E-07 | 741.55   | not significant |
| 1262 | DHX29        | -1.25 | 6.09E-11 | 3.65E-10 | 1325.55  | not significant |
| 1263 | DHX57        | -1.25 | 3.10E-10 | 1.74E-09 | 1121.29  | not significant |
| 1264 | REEP4        | -1.25 | 8.34E-13 | 5.92E-12 | 1619.05  | not significant |
| 1265 | KIF1B        | -1.25 | 1.76E-09 | 9.10E-09 | 1268.20  | not significant |
| 1266 | GUK1         | -1.25 | 1.84E-20 | 2.42E-19 | 5803.01  | not significant |
| 1267 | NUTF2        | -1.25 | 1.44E-23 | 2.33E-22 | 5043.96  | not significant |
| 1268 | CCT6A        | -1.25 | 1.82E-23 | 2.91E-22 | 15381.27 | not significant |
| 1269 | SARS         | -1.25 | 4.86E-19 | 5.80E-18 | 3998.25  | not significant |
| 1270 | FCF1         | -1.25 | 2.50E-13 | 1.86E-12 | 2425.28  | not significant |
| 1271 | DCAF4        | -1.25 | 4.55E-07 | 1.80E-06 | 690.50   | not significant |
| 1272 | SOCS2        | -1.25 | 2.01E-14 | 1.65E-13 | 2259.45  | not significant |
| 1273 | MRPS17       | -1.25 | 2.29E-06 | 8.30E-06 | 725.55   | not significant |
| 1274 | SRGAP2       | -1.25 | 8.29E-04 | 2.01E-03 | 260.34   | not significant |
| 1275 | EIF1AY       | -1.25 | 2.76E-13 | 2.04E-12 | 3685.37  | not significant |
| 1276 | PALLD        | -1.25 | 1.07E-11 | 6.90E-11 | 1464.16  | not significant |
| 1277 | INTS12       | -1.25 | 5.55E-07 | 2.16E-06 | 847.80   | not significant |
| 1278 | COPS6        | -1.25 | 4.67E-15 | 4.06E-14 | 2859.86  | not significant |
| 1279 | NCBP1        | -1.25 | 1.14E-19 | 1.42E-18 | 3354.80  | not significant |
| 1280 | EIF5         | -1.25 | 2.29E-25 | 4.18E-24 | 12789.79 | not significant |
| 1281 | KLLN         | -1.25 | 3.37E-04 | 8.82E-04 | 298.39   | not significant |
| 1282 | HIST1H3F     | -1.25 | 3.70E-02 | 6.35E-02 | 20.21    | not significant |
| 1283 | LOC643733    | -1.25 | 3.82E-02 | 6.55E-02 | 20.96    | not significant |
| 1284 | NDUFAF4      | -1.25 | 8.83E-08 | 3.80E-07 | 1063.70  | not significant |
| 1285 | IFT46        | -1.25 | 5.53E-04 | 1.39E-03 | 297.65   | not significant |
| 1286 | GNGT2        | -1.25 | 5.54E-04 | 1.39E-03 | 317.52   | not significant |
| 1287 | STC2         | -1.25 | 2.98E-02 | 5.25E-02 | 12.89    | not significant |
| 1288 | STX4         | -1.25 | 2.11E-06 | 7.65E-06 | 676.38   | not significant |
| 1289 | POP5         | -1.25 | 4.95E-08 | 2.20E-07 | 868.86   | not significant |
| 1290 | G2E3         | -1.25 | 3.43E-10 | 1.91E-09 | 1504.32  | not significant |
| 1291 | MOCS2        | -1.25 | 1.58E-13 | 1.19E-12 | 1876.20  | not significant |
| 1292 | AHCTF1       | -1.25 | 1.90E-17 | 2.01E-16 | 2950.88  | not significant |
| 1293 | FHL2         | -1.25 | 2.63E-04 | 7.03E-04 | 327.47   | not significant |
| 1294 | CAPZB        | -1.25 | 5.61E-21 | 7.66E-20 | 7473.49  | not significant |
| 1295 | ACTN1        | -1.25 | 1.20E-05 | 3.94E-05 | 501.25   | not significant |
| 1296 | XRCC4        | -1.25 | 2.12E-05 | 6.72E-05 | 502.78   | not significant |
| 1297 | UBA1         | -1.25 | 5.52E-26 | 1.03E-24 | 6064.19  | not significant |
| 1298 | DDX31        | -1.25 | 2.81E-07 | 1.14E-06 | 705.65   | not significant |
| 1299 | NUDCD2       | -1.25 | 1.22E-10 | 7.10E-10 | 1357.35  | not significant |
| 1300 | TSPAN13      | -1.25 | 4.78E-05 | 1.44E-04 | 437.85   | not significant |
| 1301 | CAB39L       | -1.25 | 1.10E-02 | 2.14E-02 | 120.58   | not significant |
| 1302 | RHOBTB3      | -1.25 | 2.80E-03 | 6.17E-03 | 279.56   | not significant |
| 1303 | CTDP1        | -1.25 | 1.42E-10 | 8.23E-10 | 1745.86  | not significant |
| 1304 | HMOX2        | -1.25 | 1.83E-10 | 1.05E-09 | 1378.99  | not significant |
| 1305 | GNPNAT1      | -1.25 | 6.70E-17 | 6.79E-16 | 2734.42  | not significant |
| 1306 | SDF2L1       | -1.25 | 4.42E-03 | 9.38E-03 | 788.62   | not significant |
| 1307 | NDUFB7       | -1.25 | 3.21E-12 | 2.17E-11 | 1701.62  | not significant |
| 1308 | HCCS         | -1.25 | 6.01E-05 | 1.79E-04 | 480.29   | not significant |

|      |           |       |          |          |          |                 |
|------|-----------|-------|----------|----------|----------|-----------------|
| 1309 | C5orf55   | -1.25 | 3.67E-02 | 6.30E-02 | 51.27    | not significant |
| 1310 | RFESD     | -1.25 | 1.29E-03 | 3.02E-03 | 227.95   | not significant |
| 1311 | CMC2      | -1.25 | 9.61E-11 | 5.66E-10 | 1576.22  | not significant |
| 1312 | IL32      | -1.25 | 2.60E-17 | 2.72E-16 | 4100.22  | not significant |
| 1313 | CNOT11    | -1.25 | 2.72E-20 | 3.53E-19 | 3682.02  | not significant |
| 1314 | PARPBP    | -1.25 | 4.39E-12 | 2.93E-11 | 1745.28  | not significant |
| 1315 | LARP4     | -1.25 | 2.43E-21 | 3.39E-20 | 5990.89  | not significant |
| 1316 | TPD52     | -1.25 | 8.44E-16 | 7.79E-15 | 3201.26  | not significant |
| 1317 | PLD2      | -1.25 | 3.62E-02 | 6.22E-02 | 54.49    | not significant |
| 1318 | WBP11     | -1.25 | 3.97E-26 | 7.52E-25 | 6548.49  | not significant |
| 1319 | GYG2      | -1.25 | 5.91E-05 | 1.76E-04 | 411.74   | not significant |
| 1320 | PPP2R5A   | -1.25 | 1.15E-14 | 9.63E-14 | 2585.29  | not significant |
| 1321 | DNHD1     | -1.25 | 1.82E-04 | 4.99E-04 | 466.88   | not significant |
| 1322 | ADK       | -1.25 | 3.20E-10 | 1.79E-09 | 1314.39  | not significant |
| 1323 | ATG101    | -1.25 | 1.39E-06 | 5.17E-06 | 849.30   | not significant |
| 1324 | NEK2      | -1.25 | 1.99E-14 | 1.64E-13 | 2350.88  | not significant |
| 1325 | COQ9      | -1.25 | 1.41E-06 | 5.24E-06 | 705.52   | not significant |
| 1326 | SUSD1     | -1.25 | 1.07E-03 | 2.53E-03 | 271.50   | not significant |
| 1327 | TSR1      | -1.25 | 2.61E-20 | 3.41E-19 | 3506.91  | not significant |
| 1328 | MTCH2     | -1.25 | 7.44E-17 | 7.49E-16 | 3573.11  | not significant |
| 1329 | PRKCB     | -1.25 | 1.14E-21 | 1.62E-20 | 8247.19  | not significant |
| 1330 | PDCD61PP2 | -1.25 | 2.92E-02 | 5.15E-02 | 62.16    | not significant |
| 1331 | HNRNPAB   | -1.25 | 4.01E-16 | 3.78E-15 | 14352.22 | not significant |
| 1332 | TPK1      | -1.25 | 2.65E-02 | 4.73E-02 | 71.22    | not significant |
| 1333 | RHPN1-AS1 | -1.25 | 1.37E-02 | 2.62E-02 | 106.15   | not significant |
| 1334 | GNL3      | -1.25 | 5.88E-23 | 9.07E-22 | 4635.58  | not significant |
| 1335 | FDX1L     | -1.25 | 5.51E-05 | 1.65E-04 | 465.55   | not significant |
| 1336 | NDUFA6    | -1.25 | 2.34E-05 | 7.38E-05 | 682.77   | not significant |
| 1337 | APRT      | -1.25 | 6.23E-17 | 6.33E-16 | 3600.56  | not significant |
| 1338 | HSPA14    | -1.25 | 8.41E-18 | 9.16E-17 | 2883.46  | not significant |
| 1339 | LMLN      | -1.25 | 6.72E-03 | 1.37E-02 | 144.64   | not significant |
| 1340 | NCBP2     | -1.25 | 3.49E-19 | 4.23E-18 | 5908.93  | not significant |
| 1341 | SEC13     | -1.25 | 4.31E-15 | 3.76E-14 | 3199.38  | not significant |
| 1342 | PRR7      | -1.24 | 1.09E-02 | 2.13E-02 | 119.31   | not significant |
| 1343 | USP35     | -1.24 | 1.49E-03 | 3.46E-03 | 246.24   | not significant |
| 1344 | BCAT2     | -1.24 | 5.57E-09 | 2.74E-08 | 1031.87  | not significant |
| 1345 | GPX1      | -1.24 | 8.83E-13 | 6.26E-12 | 2202.60  | not significant |
| 1346 | SAFB2     | -1.24 | 1.10E-17 | 1.19E-16 | 2994.52  | not significant |
| 1347 | DDX60L    | -1.24 | 3.52E-11 | 2.16E-10 | 1804.50  | not significant |
| 1348 | C8orf33   | -1.24 | 6.75E-24 | 1.12E-22 | 5378.15  | not significant |
| 1349 | GALE      | -1.24 | 3.66E-06 | 1.29E-05 | 595.12   | not significant |
| 1350 | TRIT1     | -1.24 | 3.43E-08 | 1.55E-07 | 981.34   | not significant |
| 1351 | DCTN3     | -1.24 | 1.67E-12 | 1.15E-11 | 1772.46  | not significant |
| 1352 | TREX1     | -1.24 | 6.53E-05 | 1.93E-04 | 400.73   | not significant |
| 1353 | DNAJB1    | -1.24 | 5.91E-20 | 7.52E-19 | 4101.61  | not significant |
| 1354 | TMEM165   | -1.24 | 1.06E-14 | 8.87E-14 | 2142.00  | not significant |
| 1355 | CORO1B    | -1.24 | 1.29E-10 | 7.51E-10 | 1495.84  | not significant |
| 1356 | PPP3CB    | -1.24 | 3.28E-12 | 2.21E-11 | 1891.72  | not significant |
| 1357 | SCO2      | -1.24 | 7.55E-04 | 1.84E-03 | 272.18   | not significant |
| 1358 | CBR1      | -1.24 | 1.59E-05 | 5.14E-05 | 525.82   | not significant |
| 1359 | RBM8A     | -1.24 | 7.86E-12 | 5.14E-11 | 1863.07  | not significant |
| 1360 | CARS      | -1.24 | 2.53E-12 | 1.73E-11 | 1743.64  | not significant |
| 1361 | KIF3B     | -1.24 | 6.92E-08 | 3.01E-07 | 1037.38  | not significant |
| 1362 | BOP1      | -1.24 | 2.38E-05 | 7.48E-05 | 477.94   | not significant |
| 1363 | ACOT13    | -1.24 | 3.13E-07 | 1.26E-06 | 801.59   | not significant |
| 1364 | MTDH      | -1.24 | 1.45E-26 | 2.83E-25 | 16027.26 | not significant |
| 1365 | NAA50     | -1.24 | 2.12E-27 | 4.38E-26 | 10993.91 | not significant |
| 1366 | MRPS23    | -1.24 | 1.48E-11 | 9.41E-11 | 2281.15  | not significant |
| 1367 | ARPC1B    | -1.24 | 2.55E-16 | 2.45E-15 | 7244.58  | not significant |
| 1368 | NUDT1     | -1.24 | 5.75E-10 | 3.13E-09 | 2375.78  | not significant |
| 1369 | COG8      | -1.24 | 1.54E-05 | 4.98E-05 | 532.27   | not significant |
| 1370 | NTPCR     | -1.24 | 3.56E-07 | 1.43E-06 | 858.77   | not significant |
| 1371 | MBNL1     | -1.24 | 7.79E-25 | 1.36E-23 | 28005.65 | not significant |
| 1372 | MRPS6     | -1.24 | 7.68E-15 | 6.55E-14 | 2507.67  | not significant |
| 1373 | MRPS10    | -1.24 | 1.09E-13 | 8.35E-13 | 2051.31  | not significant |
| 1374 | GTF3C6    | -1.24 | 3.57E-10 | 1.99E-09 | 2013.35  | not significant |
| 1375 | PITPNB    | -1.24 | 7.59E-10 | 4.06E-09 | 1330.64  | not significant |
| 1376 | TRMT10A   | -1.24 | 2.71E-04 | 7.21E-04 | 336.59   | not significant |
| 1377 | XPO5      | -1.24 | 9.25E-21 | 1.24E-19 | 4896.76  | not significant |
| 1378 | SEC14L2   | -1.24 | 1.60E-04 | 4.44E-04 | 389.37   | not significant |
| 1379 | MRPS14    | -1.24 | 1.11E-07 | 4.70E-07 | 971.57   | not significant |
| 1380 | H2AFZ     | -1.24 | 2.59E-06 | 9.29E-06 | 17632.62 | not significant |
| 1381 | POLR2J    | -1.24 | 1.24E-07 | 5.24E-07 | 1212.93  | not significant |
| 1382 | ARHGEF6   | -1.24 | 1.17E-24 | 2.03E-23 | 10226.58 | not significant |
| 1383 | PSMD8     | -1.24 | 1.03E-16 | 1.03E-15 | 4925.94  | not significant |
| 1384 | FAM126A   | -1.24 | 3.25E-12 | 2.19E-11 | 1783.53  | not significant |
| 1385 | LRRC8D    | -1.24 | 4.39E-11 | 2.67E-10 | 1597.25  | not significant |
| 1386 | NAT10     | -1.24 | 2.59E-17 | 2.71E-16 | 5784.88  | not significant |
| 1387 | WDR89     | -1.24 | 5.42E-09 | 2.66E-08 | 1337.26  | not significant |
| 1388 | ZNF143    | -1.24 | 2.98E-07 | 1.20E-06 | 770.71   | not significant |
| 1389 | FAM49B    | -1.24 | 7.89E-29 | 1.77E-27 | 10604.79 | not significant |
| 1390 | BCAR3     | -1.24 | 3.92E-02 | 6.69E-02 | 17.74    | not significant |
| 1391 | ODF2      | -1.24 | 3.82E-18 | 4.30E-17 | 4243.23  | not significant |
| 1392 | FAM114A2  | -1.24 | 3.59E-08 | 1.62E-07 | 931.06   | not significant |
| 1393 | CLPB      | -1.24 | 4.86E-08 | 2.17E-07 | 972.42   | not significant |
| 1394 | SAR1B     | -1.24 | 1.25E-08 | 5.92E-08 | 1237.01  | not significant |
| 1395 | R3HDM1    | -1.24 | 5.43E-20 | 6.93E-19 | 5560.65  | not significant |
| 1396 | NDUVF3    | -1.24 | 4.02E-04 | 1.04E-03 | 326.33   | not significant |



|      |              |       |          |          |          |                 |
|------|--------------|-------|----------|----------|----------|-----------------|
| 1397 | UBE2E2       | -1.24 | 5.04E-07 | 1.98E-06 | 754.15   | not significant |
| 1398 | RWDD2B       | -1.24 | 5.30E-06 | 1.82E-05 | 619.23   | not significant |
| 1399 | MTFR2        | -1.24 | 7.52E-07 | 2.88E-06 | 849.90   | not significant |
| 1400 | COX5B        | -1.24 | 3.71E-15 | 3.26E-14 | 3020.58  | not significant |
| 1401 | TRIP13       | -1.24 | 2.46E-17 | 2.58E-16 | 2945.38  | not significant |
| 1402 | EIF2AK4      | -1.24 | 7.72E-14 | 6.00E-13 | 2468.31  | not significant |
| 1403 | HYOU1        | -1.24 | 1.24E-18 | 1.44E-17 | 3334.07  | not significant |
| 1404 | CTSB         | -1.24 | 2.07E-19 | 2.54E-18 | 5192.26  | not significant |
| 1405 | DOLK         | -1.24 | 5.36E-03 | 1.12E-02 | 170.76   | not significant |
| 1406 | APOO         | -1.24 | 4.03E-06 | 1.41E-05 | 616.43   | not significant |
| 1407 | BCL9         | -1.24 | 7.27E-03 | 1.47E-02 | 163.10   | not significant |
| 1408 | DGUOK        | -1.24 | 1.11E-12 | 7.86E-12 | 2031.62  | not significant |
| 1409 | NEDD8        | -1.24 | 1.45E-12 | 1.01E-11 | 1804.92  | not significant |
| 1410 | ABHD6        | -1.24 | 1.96E-03 | 4.44E-03 | 222.53   | not significant |
| 1411 | GOSR2        | -1.24 | 1.77E-11 | 1.11E-10 | 1588.71  | not significant |
| 1412 | NUDT6        | -1.24 | 1.06E-03 | 2.53E-03 | 280.00   | not significant |
| 1413 | PSMA3        | -1.24 | 3.15E-17 | 3.27E-16 | 4139.80  | not significant |
| 1414 | INPP1        | -1.24 | 7.69E-03 | 1.55E-02 | 153.64   | not significant |
| 1415 | EXOSC7       | -1.24 | 6.29E-08 | 2.75E-07 | 997.43   | not significant |
| 1416 | ANP32E       | -1.24 | 3.14E-10 | 1.76E-09 | 2262.43  | not significant |
| 1417 | SPATA5L1     | -1.24 | 1.94E-04 | 5.31E-04 | 365.80   | not significant |
| 1418 | C1QBP        | -1.24 | 7.52E-19 | 8.84E-18 | 12039.65 | not significant |
| 1419 | LSP1         | -1.24 | 1.58E-17 | 1.68E-16 | 3525.37  | not significant |
| 1420 | TRAK2        | -1.24 | 1.50E-10 | 8.68E-10 | 1467.71  | not significant |
| 1421 | EIF2B5       | -1.24 | 2.23E-13 | 1.67E-12 | 1992.04  | not significant |
| 1422 | ATG5         | -1.24 | 7.32E-09 | 3.56E-08 | 1465.78  | not significant |
| 1423 | TLDC1        | -1.24 | 9.38E-04 | 2.25E-03 | 285.39   | not significant |
| 1424 | TOP2A        | -1.24 | 7.75E-22 | 1.11E-20 | 42048.63 | not significant |
| 1425 | MYBBP1A      | -1.24 | 5.78E-13 | 4.16E-12 | 4188.09  | not significant |
| 1426 | GOT2         | -1.24 | 3.15E-24 | 5.33E-23 | 7452.10  | not significant |
| 1427 | PTCD2        | -1.24 | 9.56E-04 | 2.29E-03 | 295.19   | not significant |
| 1428 | IPO11        | -1.24 | 8.78E-08 | 3.77E-07 | 902.05   | not significant |
| 1429 | C20orf27     | -1.24 | 3.92E-12 | 2.62E-11 | 2454.72  | not significant |
| 1430 | COA4         | -1.24 | 5.60E-09 | 2.75E-08 | 1227.57  | not significant |
| 1431 | LSM1         | -1.24 | 2.01E-12 | 1.38E-11 | 1853.44  | not significant |
| 1432 | FAM216A      | -1.24 | 1.08E-08 | 5.16E-08 | 1099.01  | not significant |
| 1433 | METTL4       | -1.24 | 4.77E-07 | 1.88E-06 | 943.43   | not significant |
| 1434 | UBE2L3       | -1.23 | 9.94E-23 | 1.51E-21 | 5166.89  | not significant |
| 1435 | GLIPR2       | -1.23 | 1.55E-04 | 4.32E-04 | 432.81   | not significant |
| 1436 | YWHAE        | -1.23 | 1.22E-26 | 2.42E-25 | 18311.71 | not significant |
| 1437 | DNAJC11      | -1.23 | 3.22E-13 | 2.37E-12 | 2182.37  | not significant |
| 1438 | SFXN1        | -1.23 | 3.64E-22 | 5.33E-21 | 4770.54  | not significant |
| 1439 | SGTA         | -1.23 | 7.17E-15 | 6.14E-14 | 4036.40  | not significant |
| 1440 | RRS1         | -1.23 | 4.02E-11 | 2.46E-10 | 1824.44  | not significant |
| 1441 | CAPN14       | -1.23 | 4.12E-02 | 6.98E-02 | 49.40    | not significant |
| 1442 | CSTF1        | -1.23 | 2.11E-11 | 1.32E-10 | 1612.54  | not significant |
| 1443 | SEC23IP      | -1.23 | 4.41E-14 | 3.51E-13 | 2331.21  | not significant |
| 1444 | PRDX3        | -1.23 | 9.97E-22 | 1.42E-20 | 9374.00  | not significant |
| 1445 | PLEKH02      | -1.23 | 6.26E-06 | 2.14E-05 | 713.37   | not significant |
| 1446 | NOL6         | -1.23 | 8.29E-16 | 7.67E-15 | 2811.77  | not significant |
| 1447 | SHQ1         | -1.23 | 2.97E-20 | 3.85E-19 | 4449.53  | not significant |
| 1448 | BMP4         | -1.23 | 4.55E-03 | 9.63E-03 | 184.78   | not significant |
| 1449 | CYB5D2       | -1.23 | 2.30E-03 | 5.14E-03 | 236.90   | not significant |
| 1450 | MRPL1        | -1.23 | 1.40E-07 | 5.89E-07 | 936.50   | not significant |
| 1451 | NRF1         | -1.23 | 1.52E-09 | 7.86E-09 | 1525.35  | not significant |
| 1452 | EWSR1        | -1.23 | 2.38E-28 | 5.21E-27 | 11723.16 | not significant |
| 1453 | USMG5        | -1.23 | 4.99E-15 | 4.32E-14 | 2821.20  | not significant |
| 1454 | PRICKLE4     | -1.23 | 2.24E-02 | 4.07E-02 | 94.26    | not significant |
| 1455 | SMARCA5      | -1.23 | 4.87E-19 | 5.81E-18 | 11462.03 | not significant |
| 1456 | NIF3L1       | -1.23 | 6.76E-10 | 3.65E-09 | 1547.30  | not significant |
| 1457 | MRPL49       | -1.23 | 3.47E-14 | 2.79E-13 | 2902.21  | not significant |
| 1458 | CENPF        | -1.23 | 5.32E-15 | 4.61E-14 | 17045.98 | not significant |
| 1459 | TDG          | -1.23 | 5.06E-17 | 5.18E-16 | 3728.71  | not significant |
| 1460 | CRLS1        | -1.23 | 8.71E-11 | 5.14E-10 | 1760.40  | not significant |
| 1461 | RQCD1        | -1.23 | 3.05E-20 | 3.94E-19 | 5444.36  | not significant |
| 1462 | SYNGR2       | -1.23 | 1.28E-10 | 7.44E-10 | 2242.07  | not significant |
| 1463 | MRPL28       | -1.23 | 2.18E-13 | 1.63E-12 | 2442.16  | not significant |
| 1464 | MKNK1        | -1.23 | 8.37E-06 | 2.81E-05 | 590.52   | not significant |
| 1465 | VRK1         | -1.23 | 2.11E-13 | 1.58E-12 | 3628.32  | not significant |
| 1466 | PREPL        | -1.23 | 1.81E-13 | 1.37E-12 | 2319.54  | not significant |
| 1467 | POLR3E       | -1.23 | 1.54E-11 | 9.78E-11 | 1865.40  | not significant |
| 1468 | LOXL1        | -1.23 | 4.95E-02 | 8.24E-02 | 28.66    | not significant |
| 1469 | TRIM66       | -1.23 | 2.81E-04 | 7.44E-04 | 501.13   | not significant |
| 1470 | NIP2         | -1.23 | 6.15E-14 | 4.84E-13 | 3064.51  | not significant |
| 1471 | USP14        | -1.23 | 2.62E-21 | 3.64E-20 | 5602.82  | not significant |
| 1472 | PDI3         | -1.23 | 2.88E-19 | 3.51E-18 | 7269.35  | not significant |
| 1473 | ID3          | -1.23 | 1.34E-05 | 4.38E-05 | 606.35   | not significant |
| 1474 | PPIH         | -1.23 | 1.68E-10 | 9.67E-10 | 2092.95  | not significant |
| 1475 | ELP4         | -1.23 | 3.95E-07 | 1.57E-06 | 880.01   | not significant |
| 1476 | CARM1        | -1.23 | 2.29E-16 | 2.21E-15 | 3684.36  | not significant |
| 1477 | LOC103611081 | -1.23 | 2.81E-03 | 6.18E-03 | 300.04   | not significant |
| 1478 | NDUFB4       | -1.23 | 6.52E-13 | 4.68E-12 | 2982.85  | not significant |
| 1479 | LOC100507250 | -1.23 | 5.04E-02 | 8.38E-02 | 28.43    | not significant |
| 1480 | NFU1         | -1.23 | 3.53E-06 | 1.25E-05 | 746.00   | not significant |
| 1481 | RPUSD2       | -1.23 | 2.81E-04 | 7.43E-04 | 426.37   | not significant |
| 1482 | HIBADH       | -1.23 | 1.58E-06 | 5.84E-06 | 827.20   | not significant |
| 1483 | ZFP36        | -1.23 | 8.06E-05 | 2.35E-04 | 462.91   | not significant |
| 1484 | THUMP3       | -1.23 | 2.71E-13 | 2.01E-12 | 2908.32  | not significant |

|      |             |       |          |          |          |                 |
|------|-------------|-------|----------|----------|----------|-----------------|
| 1485 | SNRPA1      | -1.23 | 2.09E-11 | 1.30E-10 | 2089.59  | not significant |
| 1486 | PSMD3       | -1.23 | 1.11E-20 | 1.48E-19 | 6493.40  | not significant |
| 1487 | PIIB        | -1.23 | 2.40E-16 | 2.31E-15 | 6965.68  | not significant |
| 1488 | WDR61       | -1.23 | 1.06E-08 | 5.07E-08 | 1357.41  | not significant |
| 1489 | UTP20       | -1.23 | 2.78E-04 | 7.37E-04 | 3224.90  | not significant |
| 1490 | FAM69A      | -1.23 | 4.38E-06 | 1.53E-05 | 734.62   | not significant |
| 1491 | C4orf27     | -1.23 | 2.19E-09 | 1.12E-08 | 1480.16  | not significant |
| 1492 | TRMU        | -1.23 | 3.66E-06 | 1.29E-05 | 836.10   | not significant |
| 1493 | UBL5        | -1.23 | 2.70E-04 | 7.18E-04 | 3070.59  | not significant |
| 1494 | ATP5B       | -1.23 | 3.86E-17 | 3.99E-16 | 34682.85 | not significant |
| 1495 | PRDM1       | -1.23 | 3.34E-02 | 5.81E-02 | 71.44    | not significant |
| 1496 | RNASEH1-AS1 | -1.23 | 6.64E-04 | 1.64E-03 | 321.57   | not significant |
| 1497 | MYO1C       | -1.23 | 1.54E-06 | 5.70E-06 | 838.16   | not significant |
| 1498 | CHP1        | -1.23 | 3.34E-09 | 1.68E-08 | 2079.65  | not significant |
| 1499 | POMP        | -1.23 | 4.50E-12 | 3.00E-11 | 3747.48  | not significant |
| 1500 | TRUB1       | -1.23 | 1.41E-08 | 6.61E-08 | 1200.41  | not significant |
| 1501 | DNAJC25     | -1.23 | 5.46E-03 | 1.13E-02 | 202.02   | not significant |
| 1502 | POLR2D      | -1.23 | 2.52E-17 | 2.64E-16 | 4060.02  | not significant |
| 1503 | SUSD3       | -1.23 | 9.44E-03 | 1.86E-02 | 155.30   | not significant |
| 1504 | KRTCAP2     | -1.23 | 8.87E-09 | 4.29E-08 | 1324.63  | not significant |
| 1505 | MAP4K1      | -1.23 | 1.16E-14 | 9.74E-14 | 2695.07  | not significant |
| 1506 | CPVL        | -1.23 | 9.18E-12 | 5.96E-11 | 2437.97  | not significant |
| 1507 | TCOF1       | -1.23 | 6.40E-21 | 8.69E-20 | 5967.69  | not significant |
| 1508 | IFRD2       | -1.23 | 2.20E-06 | 7.98E-06 | 761.68   | not significant |
| 1509 | TANGO6      | -1.23 | 5.06E-07 | 1.99E-06 | 888.49   | not significant |
| 1510 | KLHL18      | -1.23 | 3.64E-07 | 1.46E-06 | 903.70   | not significant |
| 1511 | PES1        | -1.22 | 8.26E-15 | 7.03E-14 | 3129.73  | not significant |
| 1512 | TNFRSF8     | -1.22 | 1.81E-06 | 6.63E-06 | 750.96   | not significant |
| 1513 | NPRL2       | -1.22 | 5.44E-06 | 1.87E-05 | 758.30   | not significant |
| 1514 | VAMP8       | -1.22 | 2.64E-04 | 7.03E-04 | 414.14   | not significant |
| 1515 | HN1L        | -1.22 | 2.71E-21 | 3.75E-20 | 4955.31  | not significant |
| 1516 | SRSF1       | -1.22 | 4.22E-25 | 7.58E-24 | 26568.82 | not significant |
| 1517 | SPATA2L     | -1.22 | 5.94E-03 | 1.22E-02 | 186.91   | not significant |
| 1518 | FKBP3       | -1.22 | 3.63E-14 | 2.91E-13 | 3089.56  | not significant |
| 1519 | POLR3GL     | -1.22 | 3.40E-04 | 8.89E-04 | 418.29   | not significant |
| 1520 | SLC16A1     | -1.22 | 2.30E-23 | 3.65E-22 | 7820.61  | not significant |
| 1521 | EI24        | -1.22 | 1.54E-10 | 8.88E-10 | 2401.29  | not significant |
| 1522 | NDUFB6      | -1.22 | 5.11E-07 | 2.00E-06 | 1536.88  | not significant |
| 1523 | EIF2S1      | -1.22 | 1.38E-18 | 1.61E-17 | 5409.02  | not significant |
| 1524 | NOTCH2      | -1.22 | 2.79E-10 | 1.57E-09 | 3024.99  | not significant |
| 1525 | ZNF652      | -1.22 | 6.64E-04 | 1.64E-03 | 414.20   | not significant |
| 1526 | TTLL12      | -1.22 | 4.82E-20 | 6.15E-19 | 6349.88  | not significant |
| 1527 | TMEM5       | -1.22 | 5.74E-05 | 1.71E-04 | 645.65   | not significant |
| 1528 | CPSF2       | -1.22 | 9.54E-20 | 1.20E-18 | 5740.87  | not significant |
| 1529 | UTP11L      | -1.22 | 5.33E-11 | 3.21E-10 | 1952.67  | not significant |
| 1530 | 43533_16638 | -1.22 | 6.61E-10 | 3.57E-09 | 1767.08  | not significant |
| 1531 | SMPD4       | -1.22 | 1.82E-14 | 1.50E-13 | 3665.64  | not significant |
| 1532 | TCEAL4      | -1.22 | 1.92E-02 | 3.53E-02 | 111.93   | not significant |
| 1533 | FTSJ1       | -1.22 | 1.35E-05 | 4.41E-05 | 612.89   | not significant |
| 1534 | CEP55       | -1.22 | 4.62E-15 | 4.02E-14 | 5548.03  | not significant |
| 1535 | RANGRF      | -1.22 | 2.25E-10 | 1.28E-09 | 1920.78  | not significant |
| 1536 | SLC6A9      | -1.22 | 1.11E-02 | 2.16E-02 | 150.43   | not significant |
| 1537 | ACTN4       | -1.22 | 7.47E-15 | 6.39E-14 | 4866.19  | not significant |
| 1538 | NSRP1       | -1.22 | 3.57E-06 | 1.26E-05 | 1084.59  | not significant |
| 1539 | C14orf64    | -1.22 | 3.21E-04 | 8.43E-04 | 469.83   | not significant |
| 1540 | EARS2       | -1.22 | 4.02E-08 | 1.80E-07 | 1347.24  | not significant |
| 1541 | MTFP1       | -1.22 | 3.89E-10 | 2.16E-09 | 2011.43  | not significant |
| 1542 | AGPS        | -1.22 | 2.06E-15 | 1.84E-14 | 3510.66  | not significant |
| 1543 | CAB39       | -1.22 | 4.85E-15 | 4.20E-14 | 5636.75  | not significant |
| 1544 | KIAA0226L   | -1.22 | 2.33E-06 | 8.44E-06 | 780.91   | not significant |
| 1545 | IDH1        | -1.22 | 2.51E-07 | 1.02E-06 | 1121.16  | not significant |
| 1546 | RALB        | -1.22 | 6.47E-06 | 2.21E-05 | 694.10   | not significant |
| 1547 | C1orf52     | -1.22 | 1.08E-06 | 4.07E-06 | 881.89   | not significant |
| 1548 | SAR1A       | -1.22 | 8.22E-18 | 8.96E-17 | 4032.03  | not significant |
| 1549 | PPP6R3      | -1.22 | 2.28E-17 | 2.40E-16 | 5982.31  | not significant |
| 1550 | C10orf2     | -1.22 | 4.60E-04 | 2.53E-09 | 1676.06  | not significant |
| 1551 | LZTS2       | -1.22 | 2.68E-04 | 7.13E-04 | 428.06   | not significant |
| 1552 | NAB2        | -1.22 | 1.13E-06 | 4.25E-06 | 863.97   | not significant |
| 1553 | MYO7B       | -1.22 | 3.28E-16 | 3.11E-15 | 46730.36 | not significant |
| 1554 | BORA        | -1.22 | 2.00E-10 | 1.14E-09 | 1822.10  | not significant |
| 1555 | LYPLAL1     | -1.22 | 2.88E-03 | 6.31E-03 | 239.68   | not significant |
| 1556 | TOMM6       | -1.22 | 1.63E-13 | 1.23E-12 | 4269.55  | not significant |
| 1557 | CAPNS1      | -1.22 | 1.43E-22 | 2.15E-21 | 6596.09  | not significant |
| 1558 | SLC7A6      | -1.22 | 1.89E-14 | 1.55E-13 | 2750.01  | not significant |
| 1559 | SLC38A10    | -1.22 | 2.15E-15 | 1.92E-14 | 3682.49  | not significant |
| 1560 | SPRTN       | -1.22 | 2.51E-05 | 7.87E-05 | 675.47   | not significant |
| 1561 | DOHH        | -1.22 | 2.24E-06 | 8.11E-06 | 1102.08  | not significant |
| 1562 | FYCO1       | -1.22 | 8.77E-10 | 4.65E-09 | 1630.71  | not significant |
| 1563 | ZNF518B     | -1.22 | 1.18E-09 | 6.20E-09 | 1471.66  | not significant |
| 1564 | PPP2R1B     | -1.22 | 7.83E-15 | 6.68E-14 | 2786.92  | not significant |
| 1565 | MIR4697HG   | -1.22 | 1.67E-03 | 3.83E-03 | 350.11   | not significant |
| 1566 | SUMO1       | -1.22 | 6.73E-12 | 4.42E-11 | 4365.30  | not significant |
| 1567 | BRCC3       | -1.22 | 5.97E-03 | 1.23E-02 | 256.86   | not significant |
| 1568 | MRPL48      | -1.22 | 3.17E-09 | 1.60E-08 | 1571.73  | not significant |
| 1569 | NDUFC2      | -1.22 | 1.65E-06 | 6.10E-06 | 941.34   | not significant |
| 1570 | PDCL3       | -1.22 | 1.37E-06 | 5.13E-06 | 1032.13  | not significant |
| 1571 | MRPL46      | -1.22 | 8.79E-05 | 2.55E-04 | 507.02   | not significant |
| 1572 | ULBP1       | -1.22 | 2.83E-05 | 8.83E-05 | 573.13   | not significant |

|      |              |       |          |          |          |                 |
|------|--------------|-------|----------|----------|----------|-----------------|
| 1573 | HDDC3        | -1.22 | 3.87E-03 | 8.32E-03 | 265.84   | not significant |
| 1574 | DENR         | -1.22 | 1.02E-22 | 1.55E-21 | 8347.83  | not significant |
| 1575 | FKBP1B       | -1.22 | 5.54E-02 | 9.10E-02 | 32.73    | not significant |
| 1576 | PSMC5        | -1.22 | 2.45E-14 | 1.99E-13 | 6686.62  | not significant |
| 1577 | NDUFB9       | -1.22 | 3.39E-14 | 2.73E-13 | 3772.19  | not significant |
| 1578 | RFK          | -1.22 | 7.13E-10 | 3.84E-09 | 1592.47  | not significant |
| 1579 | SLC35C1      | -1.22 | 1.20E-06 | 4.51E-06 | 955.54   | not significant |
| 1580 | RBM14        | -1.22 | 1.51E-17 | 1.62E-16 | 4486.47  | not significant |
| 1581 | HDAC8        | -1.22 | 1.32E-02 | 2.53E-02 | 152.56   | not significant |
| 1582 | LINC00998    | -1.22 | 3.84E-07 | 1.53E-06 | 996.98   | not significant |
| 1583 | GEMIN6       | -1.22 | 2.83E-05 | 8.82E-05 | 647.42   | not significant |
| 1584 | B9D2         | -1.22 | 1.82E-02 | 3.37E-02 | 138.62   | not significant |
| 1585 | NUDT7        | -1.22 | 2.98E-02 | 5.25E-02 | 91.09    | not significant |
| 1586 | TMEM86B      | -1.22 | 2.15E-03 | 4.84E-03 | 283.73   | not significant |
| 1587 | PARL         | -1.22 | 1.17E-08 | 5.55E-08 | 1473.41  | not significant |
| 1588 | ARHGAP19     | -1.22 | 6.42E-11 | 3.84E-10 | 3182.83  | not significant |
| 1589 | ALG3         | -1.22 | 1.59E-07 | 6.61E-07 | 1335.46  | not significant |
| 1590 | ITGA5        | -1.22 | 1.52E-12 | 1.05E-11 | 2340.20  | not significant |
| 1591 | SEH1L        | -1.22 | 4.48E-14 | 3.56E-13 | 4123.51  | not significant |
| 1592 | ZNF684       | -1.22 | 4.30E-03 | 9.14E-03 | 218.24   | not significant |
| 1593 | MED10        | -1.22 | 6.91E-10 | 3.72E-09 | 1696.91  | not significant |
| 1594 | PPP2CA       | -1.22 | 2.12E-21 | 2.96E-20 | 11068.59 | not significant |
| 1595 | DHFRL1       | -1.22 | 1.66E-06 | 6.13E-06 | 825.98   | not significant |
| 1596 | RRP12        | -1.22 | 1.45E-08 | 6.81E-08 | 1737.11  | not significant |
| 1597 | VPS45        | -1.22 | 4.87E-06 | 1.68E-05 | 732.39   | not significant |
| 1598 | EIF2B1       | -1.22 | 1.10E-15 | 1.01E-14 | 4114.03  | not significant |
| 1599 | DCXR         | -1.22 | 6.58E-10 | 3.55E-09 | 1589.68  | not significant |
| 1600 | SUCLG1       | -1.22 | 8.37E-14 | 6.49E-13 | 3041.80  | not significant |
| 1601 | MRPL16       | -1.22 | 1.50E-10 | 8.64E-10 | 2390.19  | not significant |
| 1602 | FOXO4        | -1.22 | 2.92E-04 | 7.72E-04 | 460.23   | not significant |
| 1603 | COX6B1       | -1.22 | 8.75E-15 | 7.43E-14 | 3893.76  | not significant |
| 1604 | USP10        | -1.22 | 6.25E-17 | 6.34E-16 | 4183.88  | not significant |
| 1605 | TRUB2        | -1.22 | 2.20E-06 | 7.98E-06 | 963.16   | not significant |
| 1606 | SMC6         | -1.22 | 2.30E-12 | 1.57E-11 | 2922.77  | not significant |
| 1607 | PIGK         | -1.22 | 8.14E-08 | 3.51E-07 | 1346.67  | not significant |
| 1608 | WT1-AS       | -1.22 | 5.57E-02 | 9.15E-02 | 37.94    | not significant |
| 1609 | PSMA7        | -1.22 | 1.93E-11 | 1.21E-10 | 5036.15  | not significant |
| 1610 | CYP27B1      | -1.22 | 2.96E-02 | 5.21E-02 | 105.26   | not significant |
| 1611 | SRGN         | -1.21 | 4.28E-05 | 1.30E-04 | 595.95   | not significant |
| 1612 | FKBP5        | -1.21 | 3.87E-19 | 4.66E-18 | 6631.92  | not significant |
| 1613 | KPNA4        | -1.21 | 1.89E-18 | 2.16E-17 | 5476.34  | not significant |
| 1614 | IFT57        | -1.21 | 5.45E-05 | 1.63E-04 | 549.04   | not significant |
| 1615 | C17orf89     | -1.21 | 3.02E-03 | 6.60E-03 | 1840.05  | not significant |
| 1616 | C1D          | -1.21 | 6.94E-05 | 2.04E-04 | 555.98   | not significant |
| 1617 | ZNF41        | -1.21 | 7.37E-05 | 2.16E-04 | 543.65   | not significant |
| 1618 | PPRC1        | -1.21 | 2.12E-09 | 1.09E-08 | 2757.19  | not significant |
| 1619 | ERVFRD-1     | -1.21 | 3.90E-02 | 6.66E-02 | 14.28    | not significant |
| 1620 | TNF          | -1.21 | 5.80E-02 | 9.46E-02 | 36.30    | not significant |
| 1621 | HNRNPL       | -1.21 | 3.23E-27 | 6.59E-26 | 16396.45 | not significant |
| 1622 | RNF213       | -1.21 | 1.16E-02 | 2.25E-02 | 22960.26 | not significant |
| 1623 | PDHA1        | -1.21 | 2.99E-11 | 1.84E-10 | 3386.03  | not significant |
| 1624 | ARF1         | -1.21 | 1.15E-16 | 1.14E-15 | 12748.21 | not significant |
| 1625 | LOC100862671 | -1.21 | 4.22E-03 | 8.98E-03 | 230.08   | not significant |
| 1626 | MFNG         | -1.21 | 1.20E-10 | 7.03E-10 | 2063.09  | not significant |
| 1627 | ITIH4        | -1.21 | 1.23E-02 | 2.36E-02 | 207.52   | not significant |
| 1628 | DNAJA3       | -1.21 | 2.47E-16 | 2.37E-15 | 3778.50  | not significant |
| 1629 | MIPEP        | -1.21 | 3.32E-04 | 8.70E-04 | 428.82   | not significant |
| 1630 | GADD45GIP1   | -1.21 | 1.41E-08 | 6.61E-08 | 1786.13  | not significant |
| 1631 | ZFYVE9       | -1.21 | 2.14E-02 | 3.89E-02 | 124.03   | not significant |
| 1632 | ELAC2        | -1.21 | 3.58E-14 | 2.88E-13 | 3947.57  | not significant |
| 1633 | C6orf89      | -1.21 | 2.73E-19 | 3.34E-18 | 5419.95  | not significant |
| 1634 | C8orf37      | -1.21 | 5.32E-03 | 1.11E-02 | 239.06   | not significant |
| 1635 | UBE2MP1      | -1.21 | 5.65E-02 | 9.24E-02 | 43.53    | not significant |
| 1636 | PCED1B-AS1   | -1.21 | 6.25E-04 | 1.55E-03 | 378.43   | not significant |
| 1637 | SRM          | -1.21 | 4.63E-17 | 4.75E-16 | 4211.71  | not significant |
| 1638 | PPP2R5D      | -1.21 | 2.26E-17 | 2.38E-16 | 4518.17  | not significant |
| 1639 | TSTA3        | -1.21 | 4.74E-07 | 1.87E-06 | 1401.97  | not significant |
| 1640 | ROMO1        | -1.21 | 5.71E-06 | 1.96E-05 | 965.67   | not significant |
| 1641 | MMACHC       | -1.21 | 2.37E-04 | 6.38E-04 | 482.29   | not significant |
| 1642 | PPP4R2       | -1.21 | 3.26E-09 | 1.64E-08 | 2028.98  | not significant |
| 1643 | SNRNP70      | -1.21 | 1.16E-17 | 1.25E-16 | 8458.80  | not significant |
| 1644 | CHKA         | -1.21 | 9.92E-06 | 3.29E-05 | 880.98   | not significant |
| 1645 | AMIGO2       | -1.21 | 2.50E-03 | 5.55E-03 | 276.15   | not significant |
| 1646 | RAB8A        | -1.21 | 3.29E-14 | 2.65E-13 | 5000.15  | not significant |
| 1647 | LACTB        | -1.21 | 9.58E-03 | 1.89E-02 | 180.52   | not significant |
| 1648 | C4orf33      | -1.21 | 9.34E-05 | 2.70E-04 | 592.44   | not significant |
| 1649 | HLA-C        | -1.21 | 3.47E-18 | 3.92E-17 | 7653.29  | not significant |
| 1650 | ZC3H15       | -1.21 | 9.88E-15 | 8.36E-14 | 3364.61  | not significant |
| 1651 | CACUL1       | -1.21 | 1.78E-09 | 9.18E-09 | 1532.54  | not significant |
| 1652 | GNG4         | -1.21 | 1.91E-05 | 6.12E-05 | 761.87   | not significant |
| 1653 | IFITM2       | -1.21 | 5.29E-02 | 8.73E-02 | 19.69    | not significant |
| 1654 | CARD16       | -1.21 | 5.83E-03 | 1.20E-02 | 253.70   | not significant |
| 1655 | TUBA1B       | -1.21 | 3.96E-19 | 4.76E-18 | 69042.21 | not significant |
| 1656 | C2orf27A     | -1.21 | 3.61E-02 | 6.21E-02 | 83.59    | not significant |
| 1657 | LY6E         | -1.21 | 9.67E-09 | 4.65E-08 | 1584.70  | not significant |
| 1658 | CCNC         | -1.21 | 5.47E-14 | 4.32E-13 | 3575.06  | not significant |
| 1659 | ORC5         | -1.21 | 8.03E-07 | 3.07E-06 | 1063.84  | not significant |
| 1660 | MKI67        | -1.21 | 1.53E-03 | 3.54E-03 | 29381.06 | not significant |

|      |           |       |          |          |          |                 |
|------|-----------|-------|----------|----------|----------|-----------------|
| 1661 | CLTC      | -1.21 | 9.89E-11 | 5.81E-10 | 14161.06 | not significant |
| 1662 | ACOT7     | -1.21 | 3.11E-15 | 2.74E-14 | 5971.84  | not significant |
| 1663 | CDK2AP1   | -1.21 | 1.98E-12 | 1.36E-11 | 4098.09  | not significant |
| 1664 | NDUFV2    | -1.21 | 6.56E-13 | 4.70E-12 | 2860.46  | not significant |
| 1665 | RREB1     | -1.21 | 1.22E-07 | 5.15E-07 | 1244.30  | not significant |
| 1666 | NDUFS5    | -1.21 | 6.13E-10 | 3.32E-09 | 2512.01  | not significant |
| 1667 | DIAPH3    | -1.21 | 1.27E-10 | 7.42E-10 | 2247.81  | not significant |
| 1668 | C10orf12  | -1.21 | 2.14E-04 | 5.80E-04 | 526.64   | not significant |
| 1669 | AKAP1     | -1.21 | 1.45E-14 | 1.21E-13 | 3797.90  | not significant |
| 1670 | MXRA7     | -1.21 | 1.45E-04 | 4.05E-04 | 524.46   | not significant |
| 1671 | GBE1      | -1.21 | 4.83E-07 | 1.90E-06 | 1369.20  | not significant |
| 1672 | OTUD6B    | -1.21 | 1.74E-09 | 8.97E-09 | 1707.16  | not significant |
| 1673 | CD248     | -1.21 | 3.13E-04 | 8.23E-04 | 433.10   | not significant |
| 1674 | CHST2     | -1.21 | 1.25E-12 | 8.77E-12 | 3896.85  | not significant |
| 1675 | NUDCD1    | -1.21 | 4.94E-12 | 3.29E-11 | 2856.63  | not significant |
| 1676 | XPNPEP3   | -1.21 | 5.31E-04 | 1.34E-03 | 415.42   | not significant |
| 1677 | CAPZA1    | -1.21 | 3.85E-23 | 6.04E-22 | 11609.19 | not significant |
| 1678 | ARCN1     | -1.21 | 4.04E-08 | 1.81E-07 | 1367.07  | not significant |
| 1679 | TNFRSF10A | -1.21 | 1.41E-02 | 2.68E-02 | 6.64     | not significant |
| 1680 | VPS33A    | -1.21 | 3.96E-09 | 1.98E-08 | 2009.43  | not significant |
| 1681 | ACSL1     | -1.21 | 4.24E-04 | 1.09E-03 | 463.53   | not significant |
| 1682 | PYGM      | -1.21 | 4.78E-02 | 7.99E-02 | 66.10    | not significant |
| 1683 | TSNAX     | -1.21 | 5.30E-09 | 2.61E-08 | 1540.72  | not significant |
| 1684 | STAG1     | -1.21 | 1.19E-12 | 8.38E-12 | 3245.76  | not significant |
| 1685 | LINC00999 | -1.21 | 3.30E-02 | 5.76E-02 | 101.04   | not significant |
| 1686 | ASCC3     | -1.21 | 1.69E-16 | 1.64E-15 | 5235.98  | not significant |
| 1687 | NDUFA4    | -1.21 | 6.28E-12 | 4.14E-11 | 4536.40  | not significant |
| 1688 | FAM120A   | -1.21 | 9.96E-19 | 1.17E-17 | 7970.64  | not significant |
| 1689 | LCT       | -1.21 | 1.36E-03 | 3.17E-03 | 356.62   | not significant |
| 1690 | ANAPC7    | -1.21 | 6.26E-14 | 4.92E-13 | 4027.53  | not significant |
| 1691 | PSMB2     | -1.21 | 1.29E-16 | 1.28E-15 | 9135.17  | not significant |
| 1692 | ZCCHC17   | -1.21 | 1.09E-07 | 4.63E-07 | 1377.70  | not significant |
| 1693 | TCEB3     | -1.21 | 8.91E-10 | 4.72E-09 | 2149.54  | not significant |
| 1694 | HEBP2     | -1.21 | 2.00E-03 | 4.51E-03 | 338.94   | not significant |
| 1695 | MYBL2     | -1.21 | 7.05E-18 | 7.72E-17 | 14119.97 | not significant |
| 1696 | POLE3     | -1.21 | 6.06E-18 | 6.68E-17 | 6829.98  | not significant |
| 1697 | STK40     | -1.21 | 4.22E-12 | 2.82E-11 | 2706.96  | not significant |
| 1698 | MTERF3    | -1.21 | 6.36E-08 | 2.78E-07 | 1208.68  | not significant |
| 1699 | APBB1IP   | -1.21 | 1.98E-11 | 1.24E-10 | 2443.33  | not significant |
| 1700 | LNP1      | -1.21 | 2.33E-02 | 4.22E-02 | 130.21   | not significant |
| 1701 | DTYMK     | -1.21 | 1.50E-12 | 1.04E-11 | 2875.20  | not significant |
| 1702 | EEF1E1    | -1.21 | 8.89E-04 | 2.15E-03 | 432.53   | not significant |
| 1703 | ALKBH8    | -1.21 | 4.12E-05 | 1.26E-04 | 657.70   | not significant |
| 1704 | TXNL4A    | -1.21 | 4.04E-12 | 2.70E-11 | 3584.68  | not significant |
| 1705 | CWC27     | -1.21 | 1.98E-09 | 1.02E-08 | 2217.58  | not significant |
| 1706 | HIST1H2AM | -1.21 | 6.39E-02 | 1.03E-01 | 35.85    | not significant |
| 1707 | DNAJC17   | -1.21 | 2.36E-03 | 5.27E-03 | 326.56   | not significant |
| 1708 | HMG3      | -1.21 | 3.30E-12 | 2.22E-11 | 3903.85  | not significant |
| 1709 | GEMIN2    | -1.21 | 1.89E-04 | 5.18E-04 | 522.04   | not significant |
| 1710 | ZHX3      | -1.21 | 2.37E-08 | 1.09E-07 | 1360.76  | not significant |
| 1711 | FARSA     | -1.21 | 8.97E-16 | 8.23E-15 | 5037.71  | not significant |
| 1712 | RPS19BP1  | -1.21 | 6.29E-08 | 2.75E-07 | 2735.64  | not significant |
| 1713 | EPHB1     | -1.21 | 7.54E-03 | 1.52E-02 | 205.62   | not significant |
| 1714 | PA2G4     | -1.21 | 4.15E-19 | 4.98E-18 | 18758.86 | not significant |
| 1715 | FASTKD1   | -1.21 | 1.67E-09 | 8.64E-09 | 1656.35  | not significant |
| 1716 | TSFM      | -1.21 | 5.65E-08 | 2.49E-07 | 1351.47  | not significant |
| 1717 | RHOQ      | -1.21 | 1.30E-03 | 3.04E-03 | 336.98   | not significant |
| 1718 | EMC8      | -1.21 | 1.09E-09 | 5.76E-09 | 1681.88  | not significant |
| 1719 | MON1A     | -1.21 | 1.35E-04 | 3.78E-04 | 552.64   | not significant |
| 1720 | PRDX5     | -1.20 | 6.24E-11 | 3.73E-10 | 4725.16  | not significant |
| 1721 | FTH1P3    | -1.20 | 6.42E-02 | 1.03E-01 | 35.07    | not significant |
| 1722 | SMIM24    | -1.20 | 2.52E-10 | 1.43E-09 | 2042.45  | not significant |
| 1723 | FAM63B    | -1.20 | 2.40E-03 | 5.34E-03 | 320.38   | not significant |
| 1724 | SMIM15    | -1.20 | 6.12E-03 | 1.26E-02 | 256.67   | not significant |
| 1725 | PDZD11    | -1.20 | 2.30E-07 | 9.42E-07 | 1143.42  | not significant |
| 1726 | SNRPB     | -1.20 | 1.30E-13 | 9.91E-13 | 12741.77 | not significant |
| 1727 | DDX28     | -1.20 | 8.77E-06 | 2.94E-05 | 841.38   | not significant |
| 1728 | FGD6      | -1.20 | 1.22E-03 | 2.88E-03 | 384.37   | not significant |
| 1729 | PLEKHB1   | -1.20 | 3.27E-03 | 7.11E-03 | 275.54   | not significant |
| 1730 | LARS2     | -1.20 | 3.69E-11 | 2.26E-10 | 2506.95  | not significant |
| 1731 | MOSPD1    | -1.20 | 1.28E-04 | 3.60E-04 | 565.22   | not significant |
| 1732 | PRDX4     | -1.20 | 5.57E-07 | 2.17E-06 | 1329.08  | not significant |
| 1733 | USP24     | -1.20 | 1.96E-15 | 1.75E-14 | 5972.36  | not significant |
| 1734 | CCT2      | -1.20 | 2.62E-17 | 2.73E-16 | 14780.04 | not significant |
| 1735 | RSC1A1    | -1.20 | 2.79E-03 | 6.14E-03 | 291.07   | not significant |
| 1736 | ACTR1A    | -1.20 | 5.40E-17 | 5.52E-16 | 5130.19  | not significant |
| 1737 | GSTP1     | -1.20 | 2.82E-16 | 2.70E-15 | 9485.45  | not significant |
| 1738 | MEA1      | -1.20 | 1.51E-11 | 9.59E-11 | 3407.62  | not significant |
| 1739 | FOXN2     | -1.20 | 8.41E-12 | 5.47E-11 | 2487.32  | not significant |
| 1740 | IARS2     | -1.20 | 2.38E-14 | 1.94E-13 | 4746.83  | not significant |
| 1741 | RAD54B    | -1.20 | 2.46E-08 | 1.13E-07 | 1470.69  | not significant |
| 1742 | CCDC137   | -1.20 | 8.01E-10 | 4.27E-09 | 1892.09  | not significant |
| 1743 | C2orf47   | -1.20 | 4.50E-04 | 1.15E-03 | 505.59   | not significant |
| 1744 | SCFD1     | -1.20 | 4.06E-07 | 1.61E-06 | 1274.57  | not significant |
| 1745 | PSMC3     | -1.20 | 1.44E-16 | 1.42E-15 | 6222.67  | not significant |
| 1746 | NQO1      | -1.20 | 2.10E-02 | 3.83E-02 | 139.03   | not significant |
| 1747 | GTF3C2    | -1.20 | 5.21E-13 | 3.76E-12 | 3344.03  | not significant |
| 1748 | GP5       | -1.20 | 4.05E-02 | 6.88E-02 | 13.54    | not significant |

|      |          |       |          |          |          |                 |
|------|----------|-------|----------|----------|----------|-----------------|
| 1749 | SMG7     | -1.20 | 5.28E-18 | 5.84E-17 | 6622.62  | not significant |
| 1750 | SPOP     | -1.20 | 6.02E-10 | 3.27E-09 | 2042.22  | not significant |
| 1751 | IMMT     | -1.20 | 6.24E-18 | 6.87E-17 | 5777.39  | not significant |
| 1752 | OXSM     | -1.20 | 4.45E-03 | 9.45E-03 | 265.09   | not significant |
| 1753 | COX18    | -1.20 | 1.08E-04 | 3.06E-04 | 592.43   | not significant |
| 1754 | DHX34    | -1.20 | 4.44E-07 | 1.76E-06 | 1151.93  | not significant |
| 1755 | SEC61B   | -1.20 | 4.97E-03 | 1.04E-02 | 2034.49  | not significant |
| 1756 | LUZP1    | -1.20 | 8.22E-12 | 5.36E-11 | 2851.40  | not significant |
| 1757 | SF3B6    | -1.20 | 1.67E-09 | 8.64E-09 | 2874.50  | not significant |
| 1758 | PSMD11   | -1.20 | 9.97E-15 | 8.43E-14 | 3814.66  | not significant |
| 1759 | GRPEL1   | -1.20 | 1.06E-06 | 4.02E-06 | 1392.53  | not significant |
| 1760 | PEPD     | -1.20 | 2.69E-07 | 1.10E-06 | 1261.42  | not significant |
| 1761 | DLAT     | -1.20 | 7.36E-07 | 2.82E-06 | 1050.01  | not significant |
| 1762 | C19orf53 | -1.20 | 1.67E-11 | 1.05E-10 | 2655.66  | not significant |
| 1763 | NOMO1    | -1.20 | 4.16E-05 | 1.27E-04 | 730.26   | not significant |
| 1764 | F2RL2    | -1.20 | 1.71E-02 | 3.19E-02 | 154.87   | not significant |
| 1765 | PFKM     | -1.20 | 7.85E-10 | 4.19E-09 | 1998.43  | not significant |
| 1766 | EPT1     | -1.20 | 4.61E-16 | 4.33E-15 | 4121.44  | not significant |
| 1767 | FKBP4    | -1.20 | 1.77E-18 | 2.04E-17 | 8237.49  | not significant |
| 1768 | ARHGAP5  | -1.20 | 1.92E-10 | 1.10E-09 | 2663.16  | not significant |
| 1769 | APOBEC3G | -1.20 | 3.60E-06 | 1.27E-05 | 1096.74  | not significant |
| 1770 | INSIG1   | -1.20 | 2.99E-19 | 3.64E-18 | 20943.62 | not significant |
| 1771 | EMG1     | -1.20 | 5.35E-04 | 1.35E-03 | 439.99   | not significant |
| 1772 | MAP3K7CL | -1.20 | 6.83E-03 | 1.39E-02 | 261.18   | not significant |
| 1773 | POLE2    | -1.20 | 6.11E-06 | 2.09E-05 | 1055.01  | not significant |
| 1774 | MRPS18C  | -1.20 | 4.65E-05 | 1.41E-04 | 739.77   | not significant |
| 1775 | SWAP70   | -1.20 | 3.12E-10 | 1.75E-09 | 2815.49  | not significant |
| 1776 | HINT2    | -1.20 | 1.23E-05 | 4.05E-05 | 815.18   | not significant |
| 1777 | USPL1    | -1.20 | 7.40E-09 | 3.60E-08 | 2022.28  | not significant |
| 1778 | ATP6V1E1 | -1.20 | 1.73E-12 | 1.19E-11 | 3252.43  | not significant |
| 1779 | ISOC1    | -1.20 | 2.92E-08 | 1.33E-07 | 1565.40  | not significant |
| 1780 | CHUK     | -1.20 | 1.29E-11 | 8.26E-11 | 2477.35  | not significant |
| 1781 | RNF219   | -1.20 | 2.43E-08 | 1.12E-07 | 1890.99  | not significant |
| 1782 | WBP5     | -1.20 | 8.90E-03 | 1.76E-02 | 216.92   | not significant |
| 1783 | SERBP1   | -1.20 | 1.18E-16 | 1.17E-15 | 17146.80 | not significant |
| 1784 | PUS1     | -1.20 | 1.12E-08 | 5.32E-08 | 1941.05  | not significant |
| 1785 | SGK223   | -1.20 | 6.69E-02 | 1.07E-01 | 32.95    | not significant |
| 1786 | PDCD10   | -1.20 | 1.53E-09 | 7.94E-09 | 2099.83  | not significant |
| 1787 | CYC1     | -1.20 | 6.26E-14 | 4.92E-13 | 4866.71  | not significant |
| 1788 | ASNSD1   | -1.20 | 2.46E-10 | 1.39E-09 | 2173.87  | not significant |
| 1789 | MOSPD3   | -1.20 | 1.44E-03 | 3.36E-03 | 459.90   | not significant |
| 1790 | PRKDC    | -1.20 | 2.75E-02 | 4.88E-02 | 27958.39 | not significant |
| 1791 | AURKB    | -1.20 | 3.34E-12 | 2.24E-11 | 4588.59  | not significant |
| 1792 | NOL11    | -1.20 | 1.03E-14 | 8.66E-14 | 5342.59  | not significant |
| 1793 | POLR3K   | -1.20 | 4.77E-06 | 1.65E-05 | 1015.74  | not significant |
| 1794 | PPP2R4   | -1.20 | 1.07E-09 | 5.66E-09 | 3771.79  | not significant |
| 1795 | MKX      | -1.20 | 6.86E-02 | 1.10E-01 | 33.50    | not significant |
| 1796 | ABCF2    | -1.20 | 4.48E-15 | 3.90E-14 | 4571.56  | not significant |
| 1797 | SURF6    | -1.20 | 1.50E-02 | 2.82E-02 | 172.69   | not significant |
| 1798 | APOA1BP  | -1.20 | 5.60E-09 | 2.75E-08 | 2083.18  | not significant |
| 1799 | SLC25A46 | -1.20 | 7.36E-13 | 5.25E-12 | 2914.28  | not significant |
| 1800 | DDX24    | -1.20 | 6.84E-15 | 5.88E-14 | 5786.16  | not significant |
| 1801 | HNRNPU   | -1.20 | 1.84E-21 | 2.58E-20 | 40631.85 | not significant |
| 1802 | LARS     | -1.20 | 1.69E-17 | 1.80E-16 | 7147.49  | not significant |
| 1803 | SLC27A4  | -1.20 | 1.36E-05 | 4.44E-05 | 874.17   | not significant |
| 1804 | NCOA5    | -1.20 | 3.18E-13 | 2.34E-12 | 3969.75  | not significant |
| 1805 | CISD1    | -1.20 | 2.80E-06 | 1.00E-05 | 955.36   | not significant |
| 1806 | RPUSD3   | -1.20 | 1.80E-05 | 5.76E-05 | 855.19   | not significant |
| 1807 | CHMP2B   | -1.20 | 1.73E-08 | 8.07E-08 | 1664.95  | not significant |
| 1808 | HK2      | -1.20 | 2.16E-08 | 9.99E-08 | 1578.98  | not significant |
| 1809 | PIK3C2B  | -1.20 | 7.00E-08 | 3.04E-07 | 1780.47  | not significant |
| 1810 | SSNA1    | -1.20 | 2.96E-07 | 1.20E-06 | 1996.49  | not significant |
| 1811 | LPCAT2   | -1.20 | 7.04E-02 | 1.12E-01 | 35.35    | not significant |
| 1812 | MAP2K3   | -1.20 | 2.03E-07 | 8.33E-07 | 1364.12  | not significant |
| 1813 | TWISTNB  | -1.20 | 8.03E-10 | 4.28E-09 | 2177.56  | not significant |
| 1814 | YWHAG    | -1.20 | 1.90E-19 | 2.35E-18 | 19546.74 | not significant |
| 1815 | GRHL1    | -1.20 | 6.74E-02 | 1.08E-01 | 24.75    | not significant |
| 1816 | FAM65A   | -1.20 | 5.23E-06 | 1.80E-05 | 911.30   | not significant |
| 1817 | KRAS     | -1.20 | 1.34E-10 | 7.78E-10 | 3825.66  | not significant |
| 1818 | RPAP3    | -1.20 | 3.33E-12 | 2.24E-11 | 2993.70  | not significant |
| 1819 | LONP2    | -1.20 | 1.64E-10 | 9.42E-10 | 2877.36  | not significant |
| 1820 | PIH1D1   | -1.20 | 6.39E-09 | 3.12E-08 | 1764.71  | not significant |
| 1821 | TBCCD1   | -1.20 | 4.69E-05 | 1.42E-04 | 693.13   | not significant |
| 1822 | WDR25    | -1.19 | 3.31E-02 | 5.76E-02 | 115.29   | not significant |
| 1823 | SUCLG2   | -1.19 | 1.27E-06 | 4.76E-06 | 1475.29  | not significant |
| 1824 | MRPL21   | -1.19 | 1.71E-05 | 5.49E-05 | 946.30   | not significant |
| 1825 | TCEB1    | -1.19 | 1.72E-10 | 9.91E-10 | 3078.51  | not significant |
| 1826 | TDP2     | -1.19 | 1.19E-07 | 5.05E-07 | 1971.24  | not significant |
| 1827 | ZNF468   | -1.19 | 4.50E-06 | 1.57E-05 | 971.69   | not significant |
| 1828 | KIAA0754 | -1.19 | 4.40E-09 | 2.18E-08 | 1832.17  | not significant |
| 1829 | AGK      | -1.19 | 3.17E-06 | 1.13E-05 | 944.76   | not significant |
| 1830 | LTB4R    | -1.19 | 4.82E-03 | 1.01E-02 | 423.89   | not significant |
| 1831 | DHCR7    | -1.19 | 3.31E-09 | 1.66E-08 | 2101.55  | not significant |
| 1832 | CUL2     | -1.19 | 5.88E-11 | 3.53E-10 | 2450.31  | not significant |
| 1833 | INCENP   | -1.19 | 7.32E-17 | 7.37E-16 | 6251.19  | not significant |
| 1834 | SLAIN2   | -1.19 | 2.68E-10 | 1.51E-09 | 2452.36  | not significant |
| 1835 | PHLDA3   | -1.19 | 5.35E-03 | 1.11E-02 | 277.36   | not significant |
| 1836 | GPR65    | -1.19 | 3.20E-03 | 6.97E-03 | 326.76   | not significant |

|      |            |       |          |          |          |                 |
|------|------------|-------|----------|----------|----------|-----------------|
| 1837 | PRAME      | -1.19 | 6.96E-02 | 1.11E-01 | 27.21    | not significant |
| 1838 | MTM1       | -1.19 | 8.54E-03 | 1.70E-02 | 239.10   | not significant |
| 1839 | FOS        | -1.19 | 6.16E-02 | 9.98E-02 | 59.59    | not significant |
| 1840 | EIF4E2     | -1.19 | 2.18E-08 | 1.01E-07 | 2328.20  | not significant |
| 1841 | UBE2E1     | -1.19 | 1.34E-12 | 9.37E-12 | 3886.01  | not significant |
| 1842 | DPH3       | -1.19 | 1.04E-07 | 4.43E-07 | 1482.49  | not significant |
| 1843 | S100A4     | -1.19 | 6.67E-02 | 1.07E-01 | 23.54    | not significant |
| 1844 | PBK        | -1.19 | 1.76E-11 | 1.11E-10 | 2799.76  | not significant |
| 1845 | SAP130     | -1.19 | 4.37E-08 | 1.95E-07 | 1940.25  | not significant |
| 1846 | UNC119     | -1.19 | 1.26E-04 | 3.55E-04 | 670.94   | not significant |
| 1847 | MRPS7      | -1.19 | 5.70E-10 | 3.11E-09 | 2886.14  | not significant |
| 1848 | RAB3D      | -1.19 | 2.96E-02 | 5.22E-02 | 128.41   | not significant |
| 1849 | GAA        | -1.19 | 1.41E-05 | 4.60E-05 | 1396.78  | not significant |
| 1850 | PCYT1A     | -1.19 | 2.88E-04 | 7.62E-04 | 553.94   | not significant |
| 1851 | SMIM3      | -1.19 | 5.49E-04 | 1.38E-03 | 473.71   | not significant |
| 1852 | SEC23A     | -1.19 | 9.14E-09 | 4.42E-08 | 1802.50  | not significant |
| 1853 | SDCBP2-AS1 | -1.19 | 4.58E-02 | 7.68E-02 | 92.94    | not significant |
| 1854 | BAG2       | -1.19 | 2.79E-04 | 7.39E-04 | 569.78   | not significant |
| 1855 | ABCF1      | -1.19 | 2.20E-11 | 1.37E-10 | 2553.10  | not significant |
| 1856 | TNPO1      | -1.19 | 3.83E-15 | 3.36E-14 | 10306.31 | not significant |
| 1857 | MRPL14     | -1.19 | 1.36E-06 | 5.08E-06 | 1210.73  | not significant |
| 1858 | TREML1     | -1.19 | 6.05E-02 | 9.82E-02 | 18.69    | not significant |
| 1859 | COPS4      | -1.19 | 4.11E-08 | 1.84E-07 | 1899.42  | not significant |
| 1860 | PPP1R35    | -1.19 | 1.95E-07 | 8.05E-07 | 1528.54  | not significant |
| 1861 | CCDC84     | -1.19 | 8.55E-03 | 1.70E-02 | 242.58   | not significant |
| 1862 | PXN-AS1    | -1.19 | 1.22E-02 | 2.36E-02 | 224.79   | not significant |
| 1863 | AAAS       | -1.19 | 2.13E-12 | 1.46E-11 | 3179.18  | not significant |
| 1864 | MBTPS2     | -1.19 | 3.11E-04 | 8.19E-04 | 591.13   | not significant |
| 1865 | DPY30      | -1.19 | 3.58E-06 | 1.26E-05 | 1159.71  | not significant |
| 1866 | UTP6       | -1.19 | 2.21E-06 | 8.00E-06 | 1566.11  | not significant |
| 1867 | CEBPZ      | -1.19 | 2.33E-10 | 1.33E-09 | 2902.58  | not significant |
| 1868 | ZNF778     | -1.19 | 1.54E-02 | 2.90E-02 | 198.11   | not significant |
| 1869 | PSMB9      | -1.19 | 7.93E-05 | 2.31E-04 | 996.97   | not significant |
| 1870 | JTB        | -1.19 | 3.48E-12 | 2.34E-11 | 4045.75  | not significant |
| 1871 | NAP1L5     | -1.19 | 1.98E-03 | 4.47E-03 | 382.63   | not significant |
| 1872 | GET4       | -1.19 | 7.19E-10 | 3.86E-09 | 2288.94  | not significant |
| 1873 | PPIE       | -1.19 | 7.06E-08 | 3.07E-07 | 1499.32  | not significant |
| 1874 | EXOSC3     | -1.19 | 9.55E-08 | 4.09E-07 | 1567.11  | not significant |
| 1875 | WWOX       | -1.19 | 2.09E-04 | 5.68E-04 | 577.84   | not significant |
| 1876 | COX11      | -1.19 | 1.75E-09 | 9.06E-09 | 2136.77  | not significant |
| 1877 | FAM129B    | -1.19 | 1.38E-04 | 3.87E-04 | 711.83   | not significant |
| 1878 | MED6       | -1.19 | 1.69E-06 | 6.23E-06 | 1291.68  | not significant |
| 1879 | THAP1      | -1.19 | 2.55E-05 | 8.00E-05 | 803.20   | not significant |
| 1880 | C12orf43   | -1.19 | 1.08E-06 | 4.06E-06 | 1186.19  | not significant |
| 1881 | PTBP1      | -1.19 | 6.71E-19 | 7.91E-18 | 24443.61 | not significant |
| 1882 | AAGAB      | -1.19 | 2.72E-09 | 1.38E-08 | 2415.73  | not significant |
| 1883 | HIST1H4L   | -1.19 | 4.69E-02 | 7.85E-02 | 13.36    | not significant |
| 1884 | PWP2       | -1.19 | 4.69E-07 | 1.85E-06 | 1222.95  | not significant |
| 1885 | PPIA       | -1.19 | 8.61E-12 | 5.60E-11 | 33642.47 | not significant |
| 1886 | YKT6       | -1.19 | 4.58E-12 | 3.05E-11 | 4969.46  | not significant |
| 1887 | B2M        | -1.19 | 1.89E-12 | 1.30E-11 | 37012.77 | not significant |
| 1888 | ECHS1      | -1.19 | 2.96E-08 | 1.35E-07 | 1954.63  | not significant |
| 1889 | SFRBP1     | -1.19 | 1.26E-04 | 3.55E-04 | 675.58   | not significant |
| 1890 | ITGB1BP2   | -1.19 | 6.58E-02 | 1.06E-01 | 66.37    | not significant |
| 1891 | TDRD7      | -1.19 | 4.61E-03 | 9.74E-03 | 295.99   | not significant |
| 1892 | COX8A      | -1.19 | 2.14E-10 | 1.22E-09 | 5498.16  | not significant |
| 1893 | ZCCHC5     | -1.19 | 5.88E-02 | 9.57E-02 | 16.88    | not significant |
| 1894 | RAD23B     | -1.19 | 2.17E-15 | 1.93E-14 | 5857.88  | not significant |
| 1895 | LIMD1-AS1  | -1.19 | 7.53E-02 | 1.19E-01 | 39.45    | not significant |
| 1896 | MROH8      | -1.19 | 5.14E-02 | 8.52E-02 | 89.96    | not significant |
| 1897 | HCAR1      | -1.19 | 2.31E-02 | 4.17E-02 | 156.70   | not significant |
| 1898 | DHX9       | -1.19 | 3.93E-15 | 3.44E-14 | 17809.03 | not significant |
| 1899 | C15orf39   | -1.19 | 5.50E-08 | 2.43E-07 | 1694.33  | not significant |
| 1900 | CLINT1     | -1.19 | 1.57E-16 | 1.54E-15 | 8470.61  | not significant |
| 1901 | DIABLO     | -1.19 | 3.45E-08 | 1.56E-07 | 2514.76  | not significant |
| 1902 | TYW3       | -1.19 | 1.44E-07 | 6.05E-07 | 1959.98  | not significant |
| 1903 | CAAP1      | -1.19 | 2.85E-07 | 1.15E-06 | 1530.63  | not significant |
| 1904 | ARPC5      | -1.19 | 7.09E-13 | 5.07E-12 | 7855.06  | not significant |
| 1905 | MIR210HG   | -1.19 | 3.24E-02 | 5.66E-02 | 125.69   | not significant |
| 1906 | AIDA       | -1.19 | 1.75E-04 | 4.82E-04 | 673.60   | not significant |
| 1907 | PRR22      | -1.19 | 5.77E-02 | 9.42E-02 | 81.38    | not significant |
| 1908 | GLIPR1     | -1.19 | 2.76E-04 | 7.31E-04 | 568.19   | not significant |
| 1909 | TP53I11    | -1.19 | 1.52E-08 | 7.09E-08 | 1818.58  | not significant |
| 1910 | MCM6       | -1.19 | 4.41E-13 | 3.21E-12 | 16431.03 | not significant |
| 1911 | COPS7A     | -1.19 | 5.21E-06 | 1.79E-05 | 1164.15  | not significant |
| 1912 | CFDP1      | -1.19 | 5.14E-09 | 2.54E-08 | 3405.46  | not significant |
| 1913 | RAC2       | -1.19 | 2.72E-14 | 2.21E-13 | 13375.59 | not significant |
| 1914 | SBDSP1     | -1.19 | 6.56E-03 | 1.34E-02 | 289.85   | not significant |
| 1915 | FAM149B1   | -1.19 | 2.07E-04 | 5.62E-04 | 603.54   | not significant |
| 1916 | EOMES      | -1.19 | 6.84E-03 | 1.39E-02 | 280.54   | not significant |
| 1917 | ASCC2      | -1.19 | 5.57E-11 | 3.35E-10 | 3144.62  | not significant |
| 1918 | FAM104B    | -1.19 | 1.79E-03 | 4.07E-03 | 409.71   | not significant |
| 1919 | ADPRHL2    | -1.19 | 1.70E-05 | 5.47E-05 | 1032.76  | not significant |
| 1920 | POLR1A     | -1.19 | 1.11E-08 | 5.30E-08 | 3138.89  | not significant |
| 1921 | VTI1B      | -1.19 | 3.76E-09 | 1.88E-08 | 2027.70  | not significant |
| 1922 | EBP        | -1.19 | 5.91E-04 | 1.47E-03 | 532.98   | not significant |
| 1923 | LACE1      | -1.19 | 5.62E-02 | 9.21E-02 | 88.40    | not significant |
| 1924 | TMEM63A    | -1.19 | 1.95E-04 | 5.33E-04 | 715.06   | not significant |

|      |              |       |          |          |          |                 |
|------|--------------|-------|----------|----------|----------|-----------------|
| 1925 | STXBP5       | -1.19 | 1.57E-03 | 3.62E-03 | 475.54   | not significant |
| 1926 | DNAJC8       | -1.19 | 4.03E-14 | 3.21E-13 | 5936.17  | not significant |
| 1927 | OAZ2         | -1.19 | 7.62E-07 | 2.92E-06 | 1404.86  | not significant |
| 1928 | SLC38A5      | -1.19 | 1.76E-04 | 4.86E-04 | 683.00   | not significant |
| 1929 | TMEM11       | -1.18 | 4.42E-04 | 1.13E-03 | 586.81   | not significant |
| 1930 | ARL4D        | -1.18 | 4.85E-02 | 8.09E-02 | 99.43    | not significant |
| 1931 | KCTD9        | -1.18 | 4.97E-11 | 3.01E-10 | 2884.93  | not significant |
| 1932 | FRMD6        | -1.18 | 7.80E-02 | 1.23E-01 | 42.61    | not significant |
| 1933 | BCAS2        | -1.18 | 5.39E-07 | 2.10E-06 | 1499.71  | not significant |
| 1934 | SMYD5        | -1.18 | 5.50E-07 | 2.15E-06 | 1480.30  | not significant |
| 1935 | DERA         | -1.18 | 1.02E-05 | 3.39E-05 | 985.98   | not significant |
| 1936 | C6orf223     | -1.18 | 2.07E-06 | 7.52E-06 | 1219.47  | not significant |
| 1937 | NDUFS1       | -1.18 | 4.69E-11 | 2.85E-10 | 3123.30  | not significant |
| 1938 | RNPEP        | -1.18 | 7.25E-04 | 1.78E-03 | 499.98   | not significant |
| 1939 | ZNF23        | -1.18 | 7.77E-03 | 1.56E-02 | 280.14   | not significant |
| 1940 | EIF2B2       | -1.18 | 2.69E-07 | 1.09E-06 | 1618.77  | not significant |
| 1941 | INTS2        | -1.18 | 7.80E-10 | 4.17E-09 | 3785.65  | not significant |
| 1942 | ASIC1        | -1.18 | 4.69E-06 | 1.63E-05 | 1405.69  | not significant |
| 1943 | TT C27       | -1.18 | 1.53E-06 | 5.69E-06 | 1258.15  | not significant |
| 1944 | PSMA5        | -1.18 | 6.22E-13 | 4.47E-12 | 5570.93  | not significant |
| 1945 | TOMM34       | -1.18 | 1.56E-07 | 6.51E-07 | 1683.40  | not significant |
| 1946 | BRMS1L       | -1.18 | 4.48E-03 | 9.50E-03 | 325.17   | not significant |
| 1947 | AP2M1        | -1.18 | 6.54E-13 | 4.70E-12 | 8008.82  | not significant |
| 1948 | DOCK2        | -1.18 | 1.52E-13 | 1.16E-12 | 13040.05 | not significant |
| 1949 | RBM42        | -1.18 | 6.29E-08 | 2.75E-07 | 2415.92  | not significant |
| 1950 | SLCO4A1      | -1.18 | 1.54E-07 | 6.44E-07 | 1587.72  | not significant |
| 1951 | UPRT         | -1.18 | 1.48E-05 | 4.80E-05 | 984.78   | not significant |
| 1952 | LIMK1        | -1.18 | 4.94E-03 | 1.04E-02 | 324.09   | not significant |
| 1953 | GTF2H3       | -1.18 | 1.27E-07 | 5.35E-07 | 2569.23  | not significant |
| 1954 | SIDT1        | -1.18 | 5.45E-05 | 1.63E-04 | 823.58   | not significant |
| 1955 | E2F4         | -1.18 | 2.88E-13 | 2.13E-12 | 5243.22  | not significant |
| 1956 | ACADVL       | -1.18 | 1.25E-11 | 7.97E-11 | 4276.62  | not significant |
| 1957 | HAUS7        | -1.18 | 8.03E-03 | 1.61E-02 | 278.39   | not significant |
| 1958 | HDAC9        | -1.18 | 1.25E-03 | 2.93E-03 | 445.08   | not significant |
| 1959 | EEFSEC       | -1.18 | 4.22E-06 | 1.47E-05 | 1108.50  | not significant |
| 1960 | CPSF6        | -1.18 | 4.67E-09 | 2.31E-08 | 8115.09  | not significant |
| 1961 | SEC24A       | -1.18 | 3.05E-08 | 1.39E-07 | 1891.32  | not significant |
| 1962 | DDX39A       | -1.18 | 7.22E-16 | 6.70E-15 | 8555.52  | not significant |
| 1963 | CCDC167      | -1.18 | 1.46E-07 | 6.11E-07 | 1900.90  | not significant |
| 1964 | CKAP5        | -1.18 | 7.42E-10 | 3.98E-09 | 12985.50 | not significant |
| 1965 | AP1G1        | -1.18 | 6.37E-11 | 3.81E-10 | 3723.74  | not significant |
| 1966 | SPRED2       | -1.18 | 6.77E-07 | 2.61E-06 | 1329.30  | not significant |
| 1967 | PIK3R6       | -1.18 | 6.17E-04 | 1.53E-03 | 560.39   | not significant |
| 1968 | ARF4         | -1.18 | 5.59E-10 | 3.05E-09 | 2577.30  | not significant |
| 1969 | TRA2A        | -1.18 | 3.48E-10 | 1.94E-09 | 3475.78  | not significant |
| 1970 | STRA13       | -1.18 | 2.85E-10 | 1.61E-09 | 2974.90  | not significant |
| 1971 | IPO13        | -1.18 | 1.88E-06 | 6.87E-06 | 1377.64  | not significant |
| 1972 | UBE2K        | -1.18 | 1.63E-12 | 1.13E-11 | 4965.10  | not significant |
| 1973 | NRN1         | -1.18 | 1.06E-13 | 8.17E-13 | 4711.62  | not significant |
| 1974 | PDI A6       | -1.18 | 9.85E-11 | 5.79E-10 | 10884.88 | not significant |
| 1975 | MRPL55       | -1.18 | 3.08E-04 | 8.10E-04 | 684.23   | not significant |
| 1976 | POLR3H       | -1.18 | 2.03E-07 | 8.33E-07 | 2229.38  | not significant |
| 1977 | ARHGAP30     | -1.18 | 1.42E-12 | 9.89E-12 | 9061.96  | not significant |
| 1978 | VRK2         | -1.18 | 6.43E-04 | 1.59E-03 | 520.84   | not significant |
| 1979 | PLEKHH2      | -1.18 | 8.29E-02 | 1.30E-01 | 44.18    | not significant |
| 1980 | UQC C1       | -1.18 | 1.29E-08 | 6.10E-08 | 2140.76  | not significant |
| 1981 | KIAA1524     | -1.18 | 5.77E-10 | 3.14E-09 | 2964.15  | not significant |
| 1982 | SOD2         | -1.18 | 9.24E-08 | 3.96E-07 | 1843.62  | not significant |
| 1983 | ICE2         | -1.18 | 1.05E-11 | 6.81E-11 | 3502.51  | not significant |
| 1984 | GORASP2      | -1.18 | 5.58E-13 | 4.02E-12 | 4380.83  | not significant |
| 1985 | CLCN2        | -1.18 | 2.88E-02 | 5.09E-02 | 172.61   | not significant |
| 1986 | THOC7        | -1.18 | 6.51E-10 | 3.52E-09 | 2884.81  | not significant |
| 1987 | RNASEH1      | -1.18 | 5.54E-07 | 2.16E-06 | 1541.81  | not significant |
| 1988 | KTN1         | -1.18 | 7.53E-11 | 4.47E-10 | 9378.49  | not significant |
| 1989 | LINC01481    | -1.18 | 3.77E-02 | 6.46E-02 | 128.12   | not significant |
| 1990 | METT L2A     | -1.18 | 2.53E-05 | 7.95E-05 | 919.94   | not significant |
| 1991 | LRP6         | -1.18 | 1.01E-06 | 3.81E-06 | 1473.61  | not significant |
| 1992 | CLP1         | -1.18 | 1.48E-03 | 3.43E-03 | 475.78   | not significant |
| 1993 | PRPF31       | -1.18 | 2.46E-05 | 7.72E-05 | 1224.50  | not significant |
| 1994 | ATXN1        | -1.18 | 1.26E-02 | 2.43E-02 | 287.12   | not significant |
| 1995 | CAPN1        | -1.18 | 9.42E-12 | 6.11E-11 | 4229.35  | not significant |
| 1996 | XPO1         | -1.18 | 5.97E-17 | 6.09E-16 | 19566.39 | not significant |
| 1997 | C5           | -1.18 | 3.56E-02 | 6.13E-02 | 142.02   | not significant |
| 1998 | LINC00892    | -1.18 | 8.24E-02 | 1.29E-01 | 28.07    | not significant |
| 1999 | RAC1         | -1.18 | 1.09E-13 | 8.36E-13 | 5582.69  | not significant |
| 2000 | POLK         | -1.18 | 1.66E-06 | 6.13E-06 | 1393.85  | not significant |
| 2001 | IMP3         | -1.18 | 5.96E-08 | 2.62E-07 | 1881.82  | not significant |
| 2002 | CCDC47       | -1.18 | 3.24E-11 | 1.99E-10 | 5180.73  | not significant |
| 2003 | NRBP1        | -1.18 | 2.76E-09 | 1.40E-08 | 2270.21  | not significant |
| 2004 | NFKBIB       | -1.18 | 7.89E-06 | 2.66E-05 | 1048.63  | not significant |
| 2005 | PARN         | -1.18 | 2.98E-10 | 1.68E-09 | 2597.21  | not significant |
| 2006 | AHCTF1P1     | -1.18 | 8.52E-02 | 1.33E-01 | 39.47    | not significant |
| 2007 | ISCA2        | -1.18 | 1.04E-04 | 2.98E-04 | 814.56   | not significant |
| 2008 | INTS5        | -1.18 | 2.67E-05 | 8.36E-05 | 920.64   | not significant |
| 2009 | DESI1        | -1.18 | 3.71E-09 | 1.86E-08 | 2196.64  | not significant |
| 2010 | TXN          | -1.18 | 1.18E-08 | 5.60E-08 | 3945.33  | not significant |
| 2011 | LOC100130744 | -1.18 | 3.32E-02 | 5.78E-02 | 165.88   | not significant |
| 2012 | U2AF2        | -1.18 | 1.45E-13 | 1.10E-12 | 17756.15 | not significant |

|      |              |       |          |          |          |                 |
|------|--------------|-------|----------|----------|----------|-----------------|
| 2013 | NUFIP1       | -1.18 | 1.63E-04 | 4.52E-04 | 704.71   | not significant |
| 2014 | FKBP8        | -1.18 | 4.42E-13 | 3.22E-12 | 7066.16  | not significant |
| 2015 | KDELR2       | -1.18 | 1.07E-10 | 6.28E-10 | 2881.80  | not significant |
| 2016 | OCIAD2       | -1.18 | 1.08E-06 | 4.08E-06 | 1961.67  | not significant |
| 2017 | NECAP2       | -1.18 | 6.06E-08 | 2.66E-07 | 2346.73  | not significant |
| 2018 | ERP27        | -1.18 | 4.70E-02 | 7.86E-02 | 111.03   | not significant |
| 2019 | SUB1         | -1.18 | 2.69E-13 | 2.00E-12 | 9191.28  | not significant |
| 2020 | ACO2         | -1.18 | 8.16E-14 | 6.33E-13 | 5503.97  | not significant |
| 2021 | WFIKKN1      | -1.18 | 8.81E-02 | 1.37E-01 | 31.27    | not significant |
| 2022 | GLI1         | -1.18 | 7.93E-02 | 1.25E-01 | 56.63    | not significant |
| 2023 | METTL15      | -1.18 | 4.67E-03 | 9.86E-03 | 382.78   | not significant |
| 2024 | LOC100379224 | -1.18 | 8.31E-02 | 1.30E-01 | 50.17    | not significant |
| 2025 | NARS         | -1.18 | 5.00E-14 | 3.96E-13 | 6865.52  | not significant |
| 2026 | NDUFA9       | -1.18 | 4.91E-09 | 2.43E-08 | 2869.97  | not significant |
| 2027 | DSE          | -1.18 | 4.04E-02 | 6.86E-02 | 130.14   | not significant |
| 2028 | CD79A        | -1.18 | 9.95E-03 | 1.95E-02 | 278.27   | not significant |
| 2029 | AMPD2        | -1.18 | 2.01E-08 | 9.31E-08 | 2293.11  | not significant |
| 2030 | SETBP1       | -1.18 | 5.97E-02 | 9.70E-02 | 92.98    | not significant |
| 2031 | MPZL3        | -1.18 | 4.06E-02 | 6.89E-02 | 133.87   | not significant |
| 2032 | ADIPOR2      | -1.18 | 1.22E-14 | 1.02E-13 | 6602.83  | not significant |
| 2033 | INTS10       | -1.18 | 2.64E-10 | 1.49E-09 | 2712.67  | not significant |
| 2034 | LONP1        | -1.18 | 1.32E-11 | 8.43E-11 | 4189.58  | not significant |
| 2035 | TRMT6        | -1.18 | 1.14E-07 | 4.82E-07 | 1775.33  | not significant |
| 2036 | RABL3        | -1.18 | 2.11E-07 | 8.66E-07 | 1640.44  | not significant |
| 2037 | RAB38        | -1.18 | 8.86E-02 | 1.37E-01 | 38.92    | not significant |
| 2038 | NPIP3        | -1.18 | 2.69E-02 | 4.78E-02 | 213.76   | not significant |
| 2039 | TRIM16       | -1.18 | 7.90E-03 | 1.59E-02 | 294.21   | not significant |
| 2040 | KIF11        | -1.18 | 4.78E-15 | 4.15E-14 | 11577.53 | not significant |
| 2041 | XPO6         | -1.18 | 9.04E-13 | 6.40E-12 | 6154.75  | not significant |
| 2042 | IRF2BPL      | -1.18 | 5.12E-07 | 2.00E-06 | 1711.77  | not significant |
| 2043 | PIIF         | -1.18 | 7.84E-13 | 5.58E-12 | 5335.17  | not significant |
| 2044 | BRCA2        | -1.18 | 2.66E-07 | 1.08E-06 | 2808.68  | not significant |
| 2045 | SEC11C       | -1.18 | 1.29E-05 | 4.23E-05 | 1144.78  | not significant |
| 2046 | IMMP1L       | -1.18 | 1.17E-03 | 2.76E-03 | 559.81   | not significant |
| 2047 | BZW1         | -1.18 | 8.46E-14 | 6.56E-13 | 8557.18  | not significant |
| 2048 | CCDC7        | -1.18 | 4.27E-02 | 7.22E-02 | 124.26   | not significant |
| 2049 | AKT1S1       | -1.18 | 1.86E-03 | 4.22E-03 | 475.88   | not significant |
| 2050 | NOTCH3       | -1.18 | 2.02E-05 | 6.43E-05 | 1266.30  | not significant |
| 2051 | TMEM63B      | -1.18 | 5.28E-03 | 1.10E-02 | 338.89   | not significant |
| 2052 | RPA3         | -1.18 | 1.55E-06 | 5.73E-06 | 1722.27  | not significant |
| 2053 | IDI1         | -1.18 | 7.56E-10 | 4.05E-09 | 4373.83  | not significant |
| 2054 | UBE2T        | -1.18 | 1.88E-09 | 9.69E-09 | 2530.35  | not significant |
| 2055 | NDRG3        | -1.18 | 5.04E-09 | 2.49E-08 | 2975.40  | not significant |
| 2056 | LAS1L        | -1.18 | 1.51E-08 | 7.07E-08 | 2287.19  | not significant |
| 2057 | CEP83        | -1.18 | 1.02E-05 | 3.37E-05 | 1065.72  | not significant |
| 2058 | PHF23        | -1.18 | 7.56E-06 | 2.55E-05 | 1099.14  | not significant |
| 2059 | FAM98B       | -1.18 | 1.83E-07 | 7.57E-07 | 2232.48  | not significant |
| 2060 | CSNK2A1      | -1.18 | 8.97E-14 | 6.92E-13 | 5525.37  | not significant |
| 2061 | NPRL3        | -1.18 | 4.66E-09 | 2.31E-08 | 2223.09  | not significant |
| 2062 | RAB31        | -1.18 | 8.76E-02 | 1.36E-01 | 43.49    | not significant |
| 2063 | DNAJB11      | -1.18 | 9.86E-07 | 3.74E-06 | 2420.14  | not significant |
| 2064 | GRK5         | -1.17 | 6.54E-08 | 2.85E-07 | 2329.67  | not significant |
| 2065 | MYL6         | -1.17 | 5.70E-14 | 4.49E-13 | 8760.68  | not significant |
| 2066 | CHCHD4       | -1.17 | 5.65E-05 | 1.69E-04 | 847.33   | not significant |
| 2067 | STK3         | -1.17 | 8.04E-06 | 2.71E-05 | 1210.26  | not significant |
| 2068 | SUPV3L1      | -1.17 | 9.53E-07 | 3.62E-06 | 1358.90  | not significant |
| 2069 | NELFCD       | -1.17 | 9.74E-10 | 5.15E-09 | 2964.66  | not significant |
| 2070 | SAFB         | -1.17 | 3.57E-13 | 2.61E-12 | 5887.16  | not significant |
| 2071 | STOML2       | -1.17 | 1.33E-08 | 6.28E-08 | 3662.66  | not significant |
| 2072 | PARVG        | -1.17 | 2.65E-10 | 1.50E-09 | 3183.62  | not significant |
| 2073 | HAX1         | -1.17 | 1.13E-09 | 5.92E-09 | 2769.55  | not significant |
| 2074 | KHSRP        | -1.17 | 1.00E-15 | 9.20E-15 | 16631.96 | not significant |
| 2075 | DDX49        | -1.17 | 3.11E-07 | 1.25E-06 | 1768.55  | not significant |
| 2076 | TXNDC17      | -1.17 | 1.88E-05 | 6.03E-05 | 1103.17  | not significant |
| 2077 | C19orf24     | -1.17 | 4.22E-04 | 1.08E-03 | 942.64   | not significant |
| 2078 | LINC01431    | -1.17 | 6.83E-02 | 1.09E-01 | 16.75    | not significant |
| 2079 | SLC39A10     | -1.17 | 6.35E-08 | 2.77E-07 | 2195.85  | not significant |
| 2080 | SDAD1        | -1.17 | 6.30E-10 | 3.41E-09 | 2907.28  | not significant |
| 2081 | NHP2         | -1.17 | 1.19E-09 | 6.25E-09 | 4017.97  | not significant |
| 2082 | MRPS33       | -1.17 | 1.36E-05 | 4.44E-05 | 1305.81  | not significant |
| 2083 | BUD31        | -1.17 | 9.47E-08 | 4.06E-07 | 2819.43  | not significant |
| 2084 | ATXN7L1      | -1.17 | 9.55E-04 | 2.29E-03 | 569.13   | not significant |
| 2085 | TAF3         | -1.17 | 1.99E-06 | 7.27E-06 | 1506.52  | not significant |
| 2086 | MNAT1        | -1.17 | 2.11E-04 | 5.72E-04 | 917.24   | not significant |
| 2087 | SYNCRIP      | -1.17 | 6.89E-15 | 5.92E-14 | 21807.82 | not significant |
| 2088 | HDDC2        | -1.17 | 6.23E-08 | 2.73E-07 | 1901.14  | not significant |
| 2089 | ZNF831       | -1.17 | 2.10E-02 | 3.83E-02 | 200.55   | not significant |
| 2090 | FASN         | -1.17 | 2.14E-02 | 3.89E-02 | 23856.48 | not significant |
| 2091 | MTX1         | -1.17 | 3.82E-03 | 8.21E-03 | 380.51   | not significant |
| 2092 | DHCR24       | -1.17 | 6.78E-11 | 4.05E-10 | 5448.94  | not significant |
| 2093 | CCDC18       | -1.17 | 4.40E-05 | 1.34E-04 | 982.83   | not significant |
| 2094 | NSDHL        | -1.17 | 1.41E-02 | 2.69E-02 | 252.80   | not significant |
| 2095 | MIEF1        | -1.17 | 4.25E-09 | 2.11E-08 | 3466.03  | not significant |
| 2096 | PITPNA       | -1.17 | 9.49E-11 | 5.59E-10 | 3539.40  | not significant |
| 2097 | PSMD13       | -1.17 | 2.85E-09 | 1.45E-08 | 4190.30  | not significant |
| 2098 | IL17RA       | -1.17 | 5.31E-09 | 2.62E-08 | 2286.75  | not significant |
| 2099 | GPS1         | -1.17 | 2.93E-12 | 1.98E-11 | 5078.46  | not significant |
| 2100 | TMA7         | -1.17 | 8.66E-03 | 1.72E-02 | 2557.33  | not significant |



|      |              |       |          |          |          |                 |
|------|--------------|-------|----------|----------|----------|-----------------|
| 2101 | NKIRAS1      | -1.17 | 6.55E-02 | 1.05E-01 | 94.05    | not significant |
| 2102 | LOC100506603 | -1.17 | 4.76E-02 | 7.96E-02 | 128.31   | not significant |
| 2103 | DPH2         | -1.17 | 4.99E-07 | 1.96E-06 | 1592.67  | not significant |
| 2104 | IFIH1        | -1.17 | 1.47E-03 | 3.42E-03 | 507.73   | not significant |
| 2105 | CHST1        | -1.17 | 8.51E-02 | 1.33E-01 | 63.04    | not significant |
| 2106 | TIPRL        | -1.17 | 2.62E-12 | 1.78E-11 | 4180.24  | not significant |
| 2107 | MTRR         | -1.17 | 8.58E-07 | 3.27E-06 | 1650.76  | not significant |
| 2108 | MBOAT7       | -1.17 | 3.66E-04 | 9.51E-04 | 673.73   | not significant |
| 2109 | NAGA         | -1.17 | 2.23E-04 | 6.04E-04 | 747.52   | not significant |
| 2110 | ALYREF       | -1.17 | 4.72E-11 | 2.87E-10 | 9653.73  | not significant |
| 2111 | BNIP2        | -1.17 | 1.54E-07 | 6.43E-07 | 2485.88  | not significant |
| 2112 | ITSN1        | -1.17 | 2.59E-04 | 6.93E-04 | 761.87   | not significant |
| 2113 | TRNAU1AP     | -1.17 | 1.07E-04 | 3.04E-04 | 834.09   | not significant |
| 2114 | MTAP         | -1.17 | 6.34E-10 | 3.43E-09 | 2897.94  | not significant |
| 2115 | ATAD3A       | -1.17 | 3.56E-06 | 1.26E-05 | 1980.86  | not significant |
| 2116 | DYRK3        | -1.17 | 9.41E-02 | 1.45E-01 | 37.95    | not significant |
| 2117 | PICALM       | -1.17 | 2.01E-11 | 1.26E-10 | 4211.15  | not significant |
| 2118 | DEF8         | -1.17 | 6.38E-02 | 1.03E-01 | 95.21    | not significant |
| 2119 | BTBD10       | -1.17 | 5.15E-05 | 1.54E-04 | 967.64   | not significant |
| 2120 | CABIN1       | -1.17 | 3.26E-08 | 1.48E-07 | 4169.55  | not significant |
| 2121 | FGF11        | -1.17 | 6.24E-02 | 1.01E-01 | 106.31   | not significant |
| 2122 | CORO6        | -1.17 | 6.74E-02 | 1.08E-01 | 100.40   | not significant |
| 2123 | SNX11        | -1.17 | 4.87E-04 | 1.24E-03 | 682.63   | not significant |
| 2124 | RHOF         | -1.17 | 2.58E-08 | 1.18E-07 | 2635.22  | not significant |
| 2125 | CECR5        | -1.17 | 2.82E-07 | 1.14E-06 | 2537.40  | not significant |
| 2126 | POLA1        | -1.17 | 4.90E-11 | 2.97E-10 | 4980.07  | not significant |
| 2127 | GTF2E1       | -1.17 | 6.27E-05 | 1.86E-04 | 897.26   | not significant |
| 2128 | ALKBH3       | -1.17 | 3.11E-05 | 9.64E-05 | 1084.14  | not significant |
| 2129 | RNASSEL      | -1.17 | 4.74E-03 | 9.99E-03 | 371.51   | not significant |
| 2130 | ZNHIT6       | -1.17 | 1.16E-07 | 4.93E-07 | 2032.13  | not significant |
| 2131 | SBF2         | -1.17 | 1.74E-04 | 4.81E-04 | 798.93   | not significant |
| 2132 | TMEM70       | -1.17 | 5.20E-07 | 2.04E-06 | 1974.60  | not significant |
| 2133 | VPS25        | -1.17 | 1.55E-07 | 6.48E-07 | 1760.97  | not significant |
| 2134 | TMEM104      | -1.17 | 3.44E-06 | 1.22E-05 | 1312.93  | not significant |
| 2135 | NRXN2        | -1.17 | 1.31E-02 | 2.50E-02 | 260.33   | not significant |
| 2136 | EFNA3        | -1.17 | 7.54E-02 | 1.19E-01 | 77.31    | not significant |
| 2137 | ELAVL1       | -1.17 | 1.41E-12 | 9.87E-12 | 7496.43  | not significant |
| 2138 | ATPAF2       | -1.17 | 2.06E-03 | 4.64E-03 | 478.38   | not significant |
| 2139 | TBXAS1       | -1.17 | 8.82E-02 | 1.37E-01 | 62.46    | not significant |
| 2140 | COX10        | -1.17 | 2.10E-04 | 5.70E-04 | 759.90   | not significant |
| 2141 | MRPS18B      | -1.17 | 2.91E-04 | 7.69E-04 | 718.14   | not significant |
| 2142 | SAE1         | -1.17 | 1.79E-10 | 1.03E-09 | 10017.00 | not significant |
| 2143 | UBE2D3       | -1.17 | 2.70E-16 | 2.59E-15 | 13923.47 | not significant |
| 2144 | TMED2        | -1.17 | 3.74E-13 | 2.73E-12 | 10909.28 | not significant |
| 2145 | ENOX1        | -1.17 | 7.74E-02 | 1.22E-01 | 74.70    | not significant |
| 2146 | ERCC6L       | -1.17 | 5.03E-08 | 2.23E-07 | 2084.42  | not significant |
| 2147 | IRF5         | -1.17 | 9.17E-02 | 1.41E-01 | 26.72    | not significant |
| 2148 | CHCHD1       | -1.17 | 1.84E-04 | 5.04E-04 | 930.44   | not significant |
| 2149 | ACOX3        | -1.17 | 3.99E-03 | 8.54E-03 | 401.33   | not significant |
| 2150 | IER2         | -1.17 | 3.58E-08 | 1.62E-07 | 2601.97  | not significant |
| 2151 | AP3B1        | -1.17 | 2.25E-10 | 1.28E-09 | 3657.64  | not significant |
| 2152 | CKAP2        | -1.17 | 1.78E-11 | 1.12E-10 | 5533.06  | not significant |
| 2153 | CD300A       | -1.17 | 1.54E-06 | 5.69E-06 | 1558.53  | not significant |
| 2154 | RND3         | -1.17 | 1.44E-02 | 2.74E-02 | 267.49   | not significant |
| 2155 | TACC1        | -1.17 | 1.27E-11 | 8.13E-11 | 7980.43  | not significant |
| 2156 | MRPS5        | -1.17 | 5.40E-09 | 2.66E-08 | 2741.72  | not significant |
| 2157 | LOC100506325 | -1.17 | 9.15E-02 | 1.41E-01 | 27.86    | not significant |
| 2158 | POFUT1       | -1.17 | 7.04E-10 | 3.79E-09 | 3461.72  | not significant |
| 2159 | JHDM1D-AS1   | -1.17 | 5.09E-02 | 8.44E-02 | 136.21   | not significant |
| 2160 | TBCB         | -1.17 | 3.95E-07 | 1.57E-06 | 2488.33  | not significant |
| 2161 | MARS2        | -1.17 | 2.25E-05 | 7.10E-05 | 1163.02  | not significant |
| 2162 | PIGP         | -1.17 | 1.62E-03 | 3.72E-03 | 555.22   | not significant |
| 2163 | SACM1L       | -1.17 | 1.41E-11 | 9.00E-11 | 4408.27  | not significant |
| 2164 | C1orf109     | -1.17 | 1.65E-05 | 5.32E-05 | 1184.43  | not significant |
| 2165 | ARHGAP11A    | -1.17 | 5.34E-09 | 2.63E-08 | 4329.72  | not significant |
| 2166 | ZNF185       | -1.17 | 5.84E-02 | 9.52E-02 | 13.64    | not significant |
| 2167 | RPAP2        | -1.17 | 2.57E-04 | 6.88E-04 | 829.86   | not significant |
| 2168 | ARHGAP10     | -1.17 | 8.61E-03 | 1.71E-02 | 313.30   | not significant |
| 2169 | TCP1         | -1.17 | 1.10E-11 | 7.08E-11 | 16454.37 | not significant |
| 2170 | ALKBH1       | -1.17 | 1.25E-03 | 2.94E-03 | 550.10   | not significant |
| 2171 | FAM103A1     | -1.17 | 3.04E-03 | 6.64E-03 | 469.66   | not significant |
| 2172 | SLC25A44     | -1.17 | 4.22E-06 | 1.47E-05 | 1404.07  | not significant |
| 2173 | TFEC         | -1.17 | 1.43E-08 | 6.69E-08 | 6851.84  | not significant |
| 2174 | CACNA1D      | -1.17 | 9.86E-02 | 1.51E-01 | 34.39    | not significant |
| 2175 | TMEM183A     | -1.17 | 3.77E-02 | 6.45E-02 | 181.59   | not significant |
| 2176 | SRRD         | -1.17 | 1.08E-03 | 2.56E-03 | 681.50   | not significant |
| 2177 | DDX55        | -1.17 | 4.53E-07 | 1.79E-06 | 2605.81  | not significant |
| 2178 | MRPL11       | -1.17 | 1.84E-08 | 8.55E-08 | 3015.05  | not significant |
| 2179 | PNPO         | -1.17 | 1.02E-06 | 3.86E-06 | 1723.44  | not significant |
| 2180 | ZNF664       | -1.17 | 4.54E-14 | 3.60E-13 | 11148.71 | not significant |
| 2181 | PARP11       | -1.17 | 4.83E-05 | 1.45E-04 | 1115.80  | not significant |
| 2182 | LRRC20       | -1.17 | 4.04E-06 | 1.41E-05 | 1508.26  | not significant |
| 2183 | RAB1A        | -1.17 | 1.26E-06 | 4.73E-06 | 2592.69  | not significant |
| 2184 | NFKBIE       | -1.17 | 1.41E-02 | 2.68E-02 | 267.91   | not significant |
| 2185 | TRIP12       | -1.17 | 3.75E-14 | 3.01E-13 | 8895.20  | not significant |
| 2186 | ATP6AP1L     | -1.17 | 1.67E-02 | 3.13E-02 | 253.33   | not significant |
| 2187 | CERS4        | -1.17 | 5.20E-02 | 8.60E-02 | 132.06   | not significant |
| 2188 | FAR1         | -1.17 | 8.09E-10 | 4.31E-09 | 4666.61  | not significant |

|      |          |       |          |          |          |                 |
|------|----------|-------|----------|----------|----------|-----------------|
| 2189 | DCPS     | -1.17 | 7.70E-05 | 2.25E-04 | 994.53   | not significant |
| 2190 | NT5DC3   | -1.17 | 1.25E-02 | 2.40E-02 | 291.18   | not significant |
| 2191 | BBS9     | -1.17 | 4.69E-02 | 7.86E-02 | 148.53   | not significant |
| 2192 | CCDC74A  | -1.17 | 5.51E-02 | 9.05E-02 | 123.39   | not significant |
| 2193 | RPL17    | -1.17 | 2.89E-02 | 5.11E-02 | 216.34   | not significant |
| 2194 | GUSBP1   | -1.17 | 1.96E-02 | 3.59E-02 | 241.64   | not significant |
| 2195 | MRPL18   | -1.17 | 7.09E-07 | 2.73E-06 | 1802.06  | not significant |
| 2196 | BEND6    | -1.17 | 5.82E-02 | 9.49E-02 | 12.53    | not significant |
| 2197 | SVIL-AS1 | -1.17 | 1.21E-04 | 3.41E-04 | 922.54   | not significant |
| 2198 | HLA-H    | -1.17 | 3.80E-02 | 6.50E-02 | 181.31   | not significant |
| 2199 | LSM6     | -1.17 | 1.22E-05 | 4.01E-05 | 1631.24  | not significant |
| 2200 | ISG15    | -1.17 | 4.59E-05 | 1.39E-04 | 1251.19  | not significant |
| 2201 | PIGX     | -1.16 | 4.03E-08 | 1.81E-07 | 2753.31  | not significant |
| 2202 | GGT1     | -1.16 | 5.11E-03 | 1.07E-02 | 496.66   | not significant |
| 2203 | LONRF1   | -1.16 | 4.25E-04 | 1.09E-03 | 721.84   | not significant |
| 2204 | PSMB1    | -1.16 | 9.94E-07 | 3.77E-06 | 4123.46  | not significant |
| 2205 | SLC25A30 | -1.16 | 4.56E-05 | 1.38E-04 | 1029.22  | not significant |
| 2206 | MRPS9    | -1.16 | 1.63E-05 | 5.27E-05 | 1237.99  | not significant |
| 2207 | ACSL4    | -1.16 | 1.20E-07 | 5.09E-07 | 2743.11  | not significant |
| 2208 | HECTD3   | -1.16 | 6.64E-05 | 1.96E-04 | 1041.16  | not significant |
| 2209 | POLR2I   | -1.16 | 2.05E-04 | 5.58E-04 | 945.77   | not significant |
| 2210 | BCLAF1   | -1.16 | 7.05E-11 | 4.20E-10 | 10849.40 | not significant |
| 2211 | ATRIP    | -1.16 | 4.89E-04 | 1.24E-03 | 691.28   | not significant |
| 2212 | RCAN1    | -1.16 | 8.94E-06 | 2.99E-05 | 1577.49  | not significant |
| 2213 | TBK1     | -1.16 | 1.73E-05 | 5.57E-05 | 1235.87  | not significant |
| 2214 | KIF23    | -1.16 | 1.57E-07 | 6.54E-07 | 2634.54  | not significant |
| 2215 | FERMT2   | -1.16 | 9.92E-02 | 1.51E-01 | 51.83    | not significant |
| 2216 | SNRPD3   | -1.16 | 2.47E-09 | 1.26E-08 | 7228.12  | not significant |
| 2217 | NDUFB1   | -1.16 | 6.24E-05 | 1.85E-04 | 1127.95  | not significant |
| 2218 | PARS2    | -1.16 | 2.89E-02 | 5.11E-02 | 198.41   | not significant |
| 2219 | ERI3     | -1.16 | 1.70E-06 | 6.27E-06 | 1571.62  | not significant |
| 2220 | PFAS     | -1.16 | 3.03E-10 | 1.70E-09 | 4545.06  | not significant |
| 2221 | PRPF4    | -1.16 | 1.18E-08 | 5.61E-08 | 2430.85  | not significant |
| 2222 | RAB33A   | -1.16 | 8.81E-03 | 1.75E-02 | 327.78   | not significant |
| 2223 | GEMIN5   | -1.16 | 2.14E-06 | 7.78E-06 | 1985.93  | not significant |
| 2224 | KPTN     | -1.16 | 5.33E-03 | 1.11E-02 | 397.59   | not significant |
| 2225 | LRP1     | -1.16 | 1.02E-01 | 1.55E-01 | 30.60    | not significant |
| 2226 | FAM115C  | -1.16 | 5.44E-02 | 8.96E-02 | 142.97   | not significant |
| 2227 | DPP8     | -1.16 | 7.76E-06 | 2.62E-05 | 1423.25  | not significant |
| 2228 | TRAF4    | -1.16 | 7.68E-05 | 2.24E-04 | 960.42   | not significant |
| 2229 | CLDN12   | -1.16 | 4.43E-03 | 9.39E-03 | 431.48   | not significant |
| 2230 | TRMT13   | -1.16 | 2.60E-04 | 6.96E-04 | 1137.68  | not significant |
| 2231 | KIAA1161 | -1.16 | 1.75E-02 | 3.25E-02 | 261.33   | not significant |
| 2232 | LZTS1    | -1.16 | 8.58E-10 | 4.55E-09 | 4216.48  | not significant |
| 2233 | CCER2    | -1.16 | 8.03E-02 | 1.26E-01 | 17.08    | not significant |
| 2234 | ARHGAP15 | -1.16 | 3.34E-08 | 1.51E-07 | 4125.75  | not significant |
| 2235 | SNAPIN   | -1.16 | 1.05E-04 | 3.00E-04 | 964.34   | not significant |
| 2236 | CNDP2    | -1.16 | 7.44E-12 | 4.87E-11 | 5894.96  | not significant |
| 2237 | NAA25    | -1.16 | 1.05E-07 | 4.46E-07 | 2307.48  | not significant |
| 2238 | PTER     | -1.16 | 2.67E-06 | 9.57E-06 | 1492.63  | not significant |
| 2239 | GALM     | -1.16 | 2.94E-05 | 9.15E-05 | 1142.19  | not significant |
| 2240 | STK10    | -1.16 | 1.46E-08 | 6.84E-08 | 2922.67  | not significant |
| 2241 | SLC29A2  | -1.16 | 9.85E-02 | 1.51E-01 | 63.05    | not significant |
| 2242 | IFT74    | -1.16 | 6.44E-03 | 1.32E-02 | 378.09   | not significant |
| 2243 | NAE1     | -1.16 | 9.48E-10 | 5.01E-09 | 3945.48  | not significant |
| 2244 | TSPYL2   | -1.16 | 8.05E-02 | 1.26E-01 | 82.68    | not significant |
| 2245 | TTK      | -1.16 | 9.40E-09 | 4.53E-08 | 3488.92  | not significant |
| 2246 | TOMM40L  | -1.16 | 3.38E-04 | 8.83E-04 | 745.13   | not significant |
| 2247 | TBL3     | -1.16 | 3.16E-06 | 1.12E-05 | 1550.49  | not significant |
| 2248 | MTMR10   | -1.16 | 1.51E-06 | 5.60E-06 | 1622.49  | not significant |
| 2249 | TARS2    | -1.16 | 6.98E-05 | 2.05E-04 | 980.42   | not significant |
| 2250 | POP7     | -1.16 | 1.86E-05 | 5.96E-05 | 1457.31  | not significant |
| 2251 | VEGFC    | -1.16 | 3.79E-02 | 6.49E-02 | 189.69   | not significant |
| 2252 | CSK      | -1.16 | 3.48E-12 | 2.34E-11 | 5392.91  | not significant |
| 2253 | WDR17    | -1.16 | 5.11E-02 | 8.47E-02 | 159.02   | not significant |
| 2254 | ALG14    | -1.16 | 1.08E-02 | 2.11E-02 | 320.45   | not significant |
| 2255 | MKKS     | -1.16 | 9.55E-06 | 3.18E-05 | 1880.31  | not significant |
| 2256 | CUL1     | -1.16 | 6.26E-09 | 3.06E-08 | 3857.99  | not significant |
| 2257 | UQCRC1   | -1.16 | 3.99E-10 | 2.21E-09 | 4535.60  | not significant |
| 2258 | CEACAM21 | -1.16 | 6.54E-02 | 1.05E-01 | 14.91    | not significant |
| 2259 | MTF1     | -1.16 | 2.44E-04 | 6.54E-04 | 835.91   | not significant |
| 2260 | CWC22    | -1.16 | 8.34E-06 | 2.80E-05 | 1389.58  | not significant |
| 2261 | CTNNA1   | -1.16 | 2.49E-08 | 1.14E-07 | 3238.26  | not significant |
| 2262 | BCHE     | -1.16 | 1.03E-04 | 2.94E-04 | 968.05   | not significant |
| 2263 | MRPS11   | -1.16 | 1.19E-04 | 3.37E-04 | 1018.98  | not significant |
| 2264 | RAB3A    | -1.16 | 1.02E-01 | 1.56E-01 | 53.35    | not significant |
| 2265 | IWS1     | -1.16 | 2.05E-07 | 8.43E-07 | 3466.09  | not significant |
| 2266 | DBB1     | -1.16 | 8.48E-16 | 7.82E-15 | 14074.11 | not significant |
| 2267 | EFTUD2   | -1.16 | 8.86E-14 | 6.85E-13 | 7273.55  | not significant |
| 2268 | PEA15    | -1.16 | 1.45E-05 | 4.69E-05 | 1342.81  | not significant |
| 2269 | CCAR1    | -1.16 | 1.01E-08 | 4.86E-08 | 6629.95  | not significant |
| 2270 | MAPKBP1  | -1.16 | 1.77E-04 | 4.87E-04 | 1051.00  | not significant |
| 2271 | DDX41    | -1.16 | 8.88E-09 | 4.30E-08 | 3499.11  | not significant |
| 2272 | NDUFA5   | -1.16 | 1.77E-06 | 6.51E-06 | 2452.32  | not significant |
| 2273 | NTAN1    | -1.16 | 5.95E-05 | 1.77E-04 | 1188.75  | not significant |
| 2274 | GATAD2A  | -1.16 | 6.82E-14 | 5.33E-13 | 8418.48  | not significant |
| 2275 | ZNF563   | -1.16 | 9.78E-02 | 1.50E-01 | 62.72    | not significant |
| 2276 | ARMCX6   | -1.16 | 4.59E-02 | 7.70E-02 | 164.02   | not significant |

|      |              |       |          |          |          |                 |
|------|--------------|-------|----------|----------|----------|-----------------|
| 2277 | SMIM4        | -1.16 | 5.59E-02 | 9.17E-02 | 135.77   | not significant |
| 2278 | CORO2A       | -1.16 | 4.93E-06 | 1.70E-05 | 1555.03  | not significant |
| 2279 | TMEM169      | -1.16 | 8.44E-02 | 1.32E-01 | 20.09    | not significant |
| 2280 | COX6A1       | -1.16 | 2.63E-06 | 9.43E-06 | 3262.70  | not significant |
| 2281 | PAICS        | -1.16 | 8.82E-12 | 5.73E-11 | 24734.62 | not significant |
| 2282 | SH3PXD2A-AS1 | -1.16 | 4.26E-02 | 7.21E-02 | 9.69     | not significant |
| 2283 | NOSIP        | -1.16 | 3.37E-05 | 1.04E-04 | 1324.90  | not significant |
| 2284 | GADD45B      | -1.16 | 2.39E-03 | 5.32E-03 | 538.15   | not significant |
| 2285 | NDUFS7       | -1.16 | 2.06E-05 | 6.56E-05 | 1551.16  | not significant |
| 2286 | TNFRSF10B    | -1.16 | 1.04E-01 | 1.58E-01 | 27.69    | not significant |
| 2287 | CSNK1G3      | -1.16 | 6.24E-03 | 1.28E-02 | 436.30   | not significant |
| 2288 | SLC39A7      | -1.16 | 5.16E-04 | 1.30E-03 | 729.42   | not significant |
| 2289 | THOC6        | -1.16 | 6.55E-06 | 2.23E-05 | 1447.18  | not significant |
| 2290 | ASTN2        | -1.16 | 7.02E-02 | 1.12E-01 | 105.95   | not significant |
| 2291 | YWHAB        | -1.16 | 7.44E-14 | 5.80E-13 | 21892.66 | not significant |
| 2292 | RAD50        | -1.16 | 4.79E-08 | 2.13E-07 | 3499.71  | not significant |
| 2293 | GNB4         | -1.16 | 1.40E-09 | 7.31E-09 | 5344.23  | not significant |
| 2294 | FAM50A       | -1.16 | 8.87E-04 | 2.14E-03 | 703.32   | not significant |
| 2295 | DBF4B        | -1.16 | 3.18E-06 | 1.13E-05 | 1661.12  | not significant |
| 2296 | FTSJ2        | -1.16 | 5.92E-05 | 1.77E-04 | 1708.07  | not significant |
| 2297 | HERC6        | -1.16 | 4.17E-02 | 7.06E-02 | 172.78   | not significant |
| 2298 | VTA1         | -1.16 | 9.98E-09 | 4.79E-08 | 3249.23  | not significant |
| 2299 | MAD2L1BP     | -1.16 | 8.78E-04 | 2.12E-03 | 646.46   | not significant |
| 2300 | ANKRD13C     | -1.16 | 6.10E-05 | 1.81E-04 | 1074.68  | not significant |
| 2301 | TTI1         | -1.16 | 9.21E-10 | 4.88E-09 | 3414.01  | not significant |
| 2302 | USP39        | -1.16 | 3.93E-10 | 2.18E-09 | 4974.18  | not significant |
| 2303 | CA11         | -1.16 | 2.17E-02 | 3.95E-02 | 246.05   | not significant |
| 2304 | GAN          | -1.16 | 3.34E-02 | 5.82E-02 | 212.70   | not significant |
| 2305 | ESPL1        | -1.16 | 4.52E-07 | 1.79E-06 | 6634.47  | not significant |
| 2306 | C14orf169    | -1.16 | 2.19E-05 | 6.93E-05 | 1213.56  | not significant |
| 2307 | RNF181       | -1.16 | 2.70E-04 | 7.19E-04 | 866.70   | not significant |
| 2308 | PRPF38B      | -1.16 | 5.87E-07 | 2.28E-06 | 4074.82  | not significant |
| 2309 | MFAP1        | -1.16 | 2.02E-06 | 7.35E-06 | 2015.96  | not significant |
| 2310 | HPS3         | -1.16 | 1.91E-05 | 6.10E-05 | 1342.20  | not significant |
| 2311 | MTG2         | -1.16 | 5.38E-04 | 1.36E-03 | 781.46   | not significant |
| 2312 | SPCS1        | -1.16 | 8.10E-08 | 3.49E-07 | 3346.26  | not significant |
| 2313 | TRAPPC9      | -1.16 | 1.04E-07 | 4.44E-07 | 2250.43  | not significant |
| 2314 | NDUFA2       | -1.16 | 1.49E-05 | 4.84E-05 | 1783.02  | not significant |
| 2315 | VPRBP        | -1.16 | 1.59E-04 | 4.41E-04 | 916.77   | not significant |
| 2316 | LINC00426    | -1.16 | 7.12E-03 | 1.44E-02 | 382.73   | not significant |
| 2317 | RCL1         | -1.16 | 1.32E-04 | 3.70E-04 | 977.04   | not significant |
| 2318 | SPRYD3       | -1.16 | 6.67E-04 | 1.65E-03 | 707.66   | not significant |
| 2319 | LLPH         | -1.16 | 9.42E-06 | 3.14E-05 | 1432.87  | not significant |
| 2320 | SLC9A3R1     | -1.16 | 7.19E-13 | 5.13E-12 | 15188.04 | not significant |
| 2321 | LOC100996286 | -1.16 | 2.19E-03 | 4.91E-03 | 791.91   | not significant |
| 2322 | POU2F2       | -1.16 | 8.30E-02 | 1.30E-01 | 94.77    | not significant |
| 2323 | YOD1         | -1.16 | 2.88E-05 | 8.98E-05 | 1578.06  | not significant |
| 2324 | SETMAR       | -1.16 | 3.48E-04 | 9.07E-04 | 781.54   | not significant |
| 2325 | CYTH4        | -1.16 | 1.08E-01 | 1.63E-01 | 33.18    | not significant |
| 2326 | VRK3         | -1.16 | 2.44E-05 | 7.67E-05 | 1280.14  | not significant |
| 2327 | POLDIP2      | -1.16 | 2.79E-05 | 8.72E-05 | 1379.44  | not significant |
| 2328 | IK           | -1.16 | 2.49E-09 | 1.27E-08 | 4176.06  | not significant |
| 2329 | MGST2        | -1.16 | 4.01E-02 | 6.82E-02 | 216.43   | not significant |
| 2330 | PRPF8        | -1.16 | 1.10E-02 | 2.15E-02 | 22179.95 | not significant |
| 2331 | LINC01184    | -1.16 | 1.87E-02 | 3.45E-02 | 305.42   | not significant |
| 2332 | STRADB       | -1.16 | 1.09E-03 | 2.59E-03 | 642.06   | not significant |
| 2333 | TRIM21       | -1.16 | 7.49E-04 | 1.83E-03 | 796.64   | not significant |
| 2334 | AP3S1        | -1.16 | 1.99E-07 | 8.19E-07 | 2396.55  | not significant |
| 2335 | MVK          | -1.16 | 1.56E-03 | 3.60E-03 | 719.16   | not significant |
| 2336 | ZNF511       | -1.16 | 8.14E-04 | 1.98E-03 | 702.52   | not significant |
| 2337 | ALG5         | -1.16 | 2.36E-04 | 6.34E-04 | 1220.52  | not significant |
| 2338 | TFPT         | -1.16 | 2.23E-02 | 4.05E-02 | 268.32   | not significant |
| 2339 | HSF4         | -1.16 | 3.11E-02 | 5.46E-02 | 276.59   | not significant |
| 2340 | NPR2         | -1.16 | 9.58E-02 | 1.47E-01 | 98.17    | not significant |
| 2341 | MRPL19       | -1.16 | 4.62E-07 | 1.82E-06 | 2502.10  | not significant |
| 2342 | PSMA8        | -1.16 | 4.80E-03 | 1.01E-02 | 452.67   | not significant |
| 2343 | ZC3HC1       | -1.16 | 5.37E-04 | 1.35E-03 | 809.39   | not significant |
| 2344 | ZNF101       | -1.16 | 1.93E-05 | 6.18E-05 | 1388.18  | not significant |
| 2345 | TRIM65       | -1.16 | 1.74E-06 | 6.40E-06 | 2291.99  | not significant |
| 2346 | ADCY10P1     | -1.16 | 1.03E-01 | 1.56E-01 | 64.11    | not significant |
| 2347 | NR2C2AP      | -1.16 | 4.98E-04 | 1.26E-03 | 808.91   | not significant |
| 2348 | PISD         | -1.16 | 9.27E-06 | 3.09E-05 | 1537.85  | not significant |
| 2349 | RPL7L1       | -1.16 | 3.49E-05 | 1.07E-04 | 1519.66  | not significant |
| 2350 | CTNBL1       | -1.16 | 4.48E-08 | 2.00E-07 | 3108.11  | not significant |
| 2351 | CCDC109B     | -1.16 | 2.75E-07 | 1.12E-06 | 3125.80  | not significant |
| 2352 | FADS1        | -1.16 | 9.18E-12 | 5.95E-11 | 7950.05  | not significant |
| 2353 | RNPS1        | -1.16 | 6.18E-10 | 3.35E-09 | 7478.26  | not significant |
| 2354 | RBM12        | -1.16 | 1.43E-10 | 8.28E-10 | 7467.85  | not significant |
| 2355 | AKR1B1       | -1.16 | 1.75E-09 | 9.04E-09 | 4317.50  | not significant |
| 2356 | LRRC47       | -1.16 | 8.19E-08 | 3.53E-07 | 2429.13  | not significant |
| 2357 | CIAPIN1      | -1.16 | 1.03E-05 | 3.41E-05 | 1768.29  | not significant |
| 2358 | CCDC117      | -1.16 | 7.94E-10 | 4.24E-09 | 3957.11  | not significant |
| 2359 | UBE2M        | -1.16 | 5.05E-08 | 2.24E-07 | 3821.88  | not significant |
| 2360 | WDR92        | -1.16 | 2.73E-03 | 6.01E-03 | 591.44   | not significant |
| 2361 | SUOX         | -1.16 | 1.13E-01 | 1.69E-01 | 33.85    | not significant |
| 2362 | EED          | -1.16 | 1.01E-04 | 2.90E-04 | 1181.89  | not significant |
| 2363 | NFKB1        | -1.15 | 4.06E-08 | 1.82E-07 | 2542.43  | not significant |
| 2364 | PRPF38A      | -1.15 | 1.02E-10 | 5.96E-10 | 4718.12  | not significant |

|      |            |       |          |          |          |                 |
|------|------------|-------|----------|----------|----------|-----------------|
| 2365 | MTOR       | -1.15 | 2.61E-06 | 9.37E-06 | 4210.90  | not significant |
| 2366 | IKBIP      | -1.15 | 2.74E-04 | 7.27E-04 | 1091.35  | not significant |
| 2367 | UROD       | -1.15 | 1.37E-04 | 3.83E-04 | 1075.93  | not significant |
| 2368 | MYO1A      | -1.15 | 1.13E-01 | 1.69E-01 | 29.55    | not significant |
| 2369 | EML5       | -1.15 | 2.50E-02 | 4.49E-02 | 280.38   | not significant |
| 2370 | C9orf41    | -1.15 | 1.06E-03 | 2.53E-03 | 766.83   | not significant |
| 2371 | MAPK1IP1L  | -1.15 | 1.52E-09 | 7.86E-09 | 5805.09  | not significant |
| 2372 | CAPZA2     | -1.15 | 7.61E-09 | 3.70E-08 | 3394.19  | not significant |
| 2373 | RAB11FIP4  | -1.15 | 1.11E-01 | 1.67E-01 | 31.83    | not significant |
| 2374 | RCOR2      | -1.15 | 6.88E-02 | 1.10E-01 | 125.18   | not significant |
| 2375 | IQCE       | -1.15 | 3.36E-04 | 8.79E-04 | 935.87   | not significant |
| 2376 | ISG20L2    | -1.15 | 1.57E-06 | 5.79E-06 | 1930.12  | not significant |
| 2377 | TBC1D4     | -1.15 | 4.11E-06 | 1.44E-05 | 1713.93  | not significant |
| 2378 | MDFI       | -1.15 | 5.05E-06 | 1.74E-05 | 1711.58  | not significant |
| 2379 | UQCC3      | -1.15 | 1.03E-02 | 2.02E-02 | 469.89   | not significant |
| 2380 | AFAP1L2    | -1.15 | 1.10E-01 | 1.66E-01 | 26.22    | not significant |
| 2381 | ATP6V1B2   | -1.15 | 1.31E-08 | 6.21E-08 | 2934.81  | not significant |
| 2382 | 43710_4150 | -1.15 | 2.31E-11 | 1.44E-10 | 12137.52 | not significant |
| 2383 | RAET1K     | -1.15 | 9.20E-02 | 1.42E-01 | 92.01    | not significant |
| 2384 | ADD3       | -1.15 | 1.65E-13 | 1.25E-12 | 9120.82  | not significant |
| 2385 | GORASP1    | -1.15 | 1.35E-02 | 2.57E-02 | 382.65   | not significant |
| 2386 | STK4       | -1.15 | 2.92E-13 | 2.16E-12 | 7773.96  | not significant |
| 2387 | SSU72      | -1.15 | 2.78E-09 | 1.41E-08 | 3783.94  | not significant |
| 2388 | FAM86C1    | -1.15 | 6.63E-02 | 1.06E-01 | 129.63   | not significant |
| 2389 | RPS6KA4    | -1.15 | 5.23E-06 | 1.80E-05 | 1696.95  | not significant |
| 2390 | PARP1      | -1.15 | 1.25E-13 | 9.52E-13 | 11465.33 | not significant |
| 2391 | TRIP6      | -1.15 | 1.14E-01 | 1.71E-01 | 29.58    | not significant |
| 2392 | ARHGEF25   | -1.15 | 1.08E-01 | 1.63E-01 | 67.37    | not significant |
| 2393 | DESI2      | -1.15 | 2.09E-08 | 9.67E-08 | 3904.32  | not significant |
| 2394 | NUP188     | -1.15 | 2.28E-10 | 1.30E-09 | 5305.61  | not significant |
| 2395 | SLA2       | -1.15 | 2.58E-08 | 1.18E-07 | 4005.42  | not significant |
| 2396 | SCRN1      | -1.15 | 7.53E-02 | 1.19E-01 | 114.11   | not significant |
| 2397 | ST6GALNAC6 | -1.15 | 3.49E-03 | 7.55E-03 | 518.04   | not significant |
| 2398 | NSFL1C     | -1.15 | 8.77E-07 | 3.34E-06 | 2063.58  | not significant |
| 2399 | MDC1       | -1.15 | 6.92E-03 | 1.41E-02 | 440.49   | not significant |
| 2400 | TMED10     | -1.15 | 1.67E-14 | 1.38E-13 | 14724.44 | not significant |
| 2401 | CYB5R3     | -1.15 | 5.71E-09 | 2.80E-08 | 4982.33  | not significant |
| 2402 | NOTCH2NL   | -1.15 | 8.03E-02 | 1.26E-01 | 120.75   | not significant |
| 2403 | ISCU       | -1.15 | 5.94E-08 | 2.61E-07 | 2697.75  | not significant |
| 2404 | GABPB2     | -1.15 | 1.31E-02 | 2.51E-02 | 338.37   | not significant |
| 2405 | NOL8       | -1.15 | 3.54E-06 | 1.25E-05 | 1912.57  | not significant |
| 2406 | VPS8       | -1.15 | 5.13E-04 | 1.30E-03 | 832.41   | not significant |
| 2407 | CCDC6      | -1.15 | 1.94E-05 | 6.18E-05 | 1412.21  | not significant |
| 2408 | GBAS       | -1.15 | 1.55E-07 | 6.49E-07 | 2854.41  | not significant |
| 2409 | ENTPD5     | -1.15 | 2.64E-02 | 4.71E-02 | 253.94   | not significant |
| 2410 | RBBP7      | -1.15 | 1.09E-09 | 5.75E-09 | 10249.38 | not significant |
| 2411 | INPP5A     | -1.15 | 3.41E-03 | 7.39E-03 | 541.66   | not significant |
| 2412 | SF1        | -1.15 | 3.27E-13 | 2.40E-12 | 16293.28 | not significant |
| 2413 | TDRKH      | -1.15 | 9.46E-04 | 2.27E-03 | 724.67   | not significant |
| 2414 | ATF7IP2    | -1.15 | 2.29E-03 | 5.11E-03 | 629.47   | not significant |
| 2415 | CCDC125    | -1.15 | 7.50E-02 | 1.19E-01 | 124.26   | not significant |
| 2416 | TRAPPC4    | -1.15 | 4.46E-02 | 7.51E-02 | 198.46   | not significant |
| 2417 | PMS2CL     | -1.15 | 1.44E-02 | 2.74E-02 | 403.73   | not significant |
| 2418 | RGS19      | -1.15 | 5.94E-04 | 1.48E-03 | 1334.80  | not significant |
| 2419 | ABCB8      | -1.15 | 1.26E-04 | 3.55E-04 | 1388.53  | not significant |
| 2420 | NRBF2      | -1.15 | 4.03E-03 | 8.62E-03 | 545.72   | not significant |
| 2421 | RABEP1     | -1.15 | 9.78E-09 | 4.70E-08 | 5172.07  | not significant |
| 2422 | R3HCC1L    | -1.15 | 1.12E-04 | 3.17E-04 | 1070.62  | not significant |
| 2423 | TBC1D7     | -1.15 | 2.76E-03 | 6.09E-03 | 571.57   | not significant |
| 2424 | ESF1       | -1.15 | 1.33E-05 | 4.36E-05 | 1816.93  | not significant |
| 2425 | WDR44      | -1.15 | 2.75E-04 | 7.30E-04 | 924.17   | not significant |
| 2426 | CCNK       | -1.15 | 2.44E-10 | 1.38E-09 | 4666.02  | not significant |
| 2427 | NUDT9      | -1.15 | 1.54E-03 | 3.55E-03 | 821.91   | not significant |
| 2428 | MTMR1      | -1.15 | 3.10E-03 | 6.78E-03 | 563.56   | not significant |
| 2429 | NDUFA13    | -1.15 | 7.88E-03 | 1.58E-02 | 3595.16  | not significant |
| 2430 | BCAP31     | -1.15 | 9.54E-06 | 3.17E-05 | 2402.07  | not significant |
| 2431 | ANKRD27    | -1.15 | 1.14E-05 | 3.75E-05 | 1662.47  | not significant |
| 2432 | CBWD5      | -1.15 | 1.14E-01 | 1.71E-01 | 28.46    | not significant |
| 2433 | STYXL1     | -1.15 | 1.25E-02 | 2.40E-02 | 348.10   | not significant |
| 2434 | SART3      | -1.15 | 3.25E-10 | 1.82E-09 | 5670.07  | not significant |
| 2435 | PPP1CC     | -1.15 | 3.17E-11 | 1.95E-10 | 12064.25 | not significant |
| 2436 | GDF11      | -1.15 | 1.47E-04 | 4.11E-04 | 1413.85  | not significant |
| 2437 | BNIP3      | -1.15 | 1.65E-04 | 4.57E-04 | 992.08   | not significant |
| 2438 | ABHD14B    | -1.15 | 7.79E-05 | 2.27E-04 | 1211.58  | not significant |
| 2439 | AKIRIN2    | -1.15 | 1.36E-04 | 3.82E-04 | 1053.54  | not significant |
| 2440 | AEBP2      | -1.15 | 1.98E-06 | 7.22E-06 | 2925.74  | not significant |
| 2441 | SPTLC1     | -1.15 | 1.07E-04 | 3.06E-04 | 1254.64  | not significant |
| 2442 | CYSTM1     | -1.15 | 5.66E-02 | 9.26E-02 | 159.41   | not significant |
| 2443 | NUP107     | -1.15 | 2.93E-08 | 1.34E-07 | 5469.12  | not significant |
| 2444 | UNC13D     | -1.15 | 4.38E-13 | 3.19E-12 | 9384.49  | not significant |
| 2445 | CHMP4B     | -1.15 | 2.04E-08 | 9.44E-08 | 5667.06  | not significant |
| 2446 | ZCCHC9     | -1.15 | 1.04E-05 | 3.43E-05 | 1541.82  | not significant |
| 2447 | MBNL1-AS1  | -1.15 | 1.13E-01 | 1.70E-01 | 25.19    | not significant |
| 2448 | OGFOD2     | -1.15 | 7.88E-04 | 1.92E-03 | 865.55   | not significant |
| 2449 | C16orf72   | -1.15 | 1.17E-04 | 3.31E-04 | 1452.60  | not significant |
| 2450 | HPDL       | -1.15 | 5.71E-02 | 9.33E-02 | 182.65   | not significant |
| 2451 | CDK7       | -1.15 | 1.03E-02 | 2.01E-02 | 492.79   | not significant |
| 2452 | YWHAQ      | -1.15 | 1.73E-11 | 1.09E-10 | 17560.08 | not significant |

|      |              |       |          |          |          |                 |
|------|--------------|-------|----------|----------|----------|-----------------|
| 2453 | SLC4A1AP     | -1.15 | 1.01E-04 | 2.91E-04 | 1098.42  | not significant |
| 2454 | FOSL2        | -1.15 | 1.07E-01 | 1.62E-01 | 74.01    | not significant |
| 2455 | RELL2        | -1.15 | 7.55E-02 | 1.19E-01 | 143.41   | not significant |
| 2456 | IGSF9B       | -1.15 | 2.47E-02 | 4.44E-02 | 294.11   | not significant |
| 2457 | MGAT2        | -1.15 | 2.85E-06 | 1.02E-05 | 1982.35  | not significant |
| 2458 | SLC25A12     | -1.15 | 1.99E-05 | 6.34E-05 | 1605.18  | not significant |
| 2459 | GYS1         | -1.15 | 4.24E-06 | 1.48E-05 | 1933.43  | not significant |
| 2460 | SNW1         | -1.15 | 7.05E-07 | 2.72E-06 | 2791.94  | not significant |
| 2461 | FBLN7        | -1.15 | 1.22E-01 | 1.81E-01 | 50.74    | not significant |
| 2462 | LAP3         | -1.15 | 1.67E-05 | 5.38E-05 | 1574.20  | not significant |
| 2463 | MICU2        | -1.15 | 5.70E-05 | 1.70E-04 | 1372.66  | not significant |
| 2464 | SPRYD7       | -1.15 | 1.05E-01 | 1.60E-01 | 87.61    | not significant |
| 2465 | NF1          | -1.15 | 5.05E-09 | 2.50E-08 | 4382.48  | not significant |
| 2466 | RHNO1        | -1.15 | 1.31E-08 | 6.18E-08 | 3177.59  | not significant |
| 2467 | SLIRP        | -1.15 | 1.86E-03 | 4.23E-03 | 776.37   | not significant |
| 2468 | PPIL2        | -1.15 | 5.33E-07 | 2.08E-06 | 2774.10  | not significant |
| 2469 | MINPP1       | -1.15 | 1.86E-04 | 5.09E-04 | 1098.55  | not significant |
| 2470 | TRAF1        | -1.15 | 1.11E-01 | 1.66E-01 | 75.75    | not significant |
| 2471 | SMIM11       | -1.15 | 1.92E-03 | 4.35E-03 | 764.83   | not significant |
| 2472 | RPAP1        | -1.15 | 2.11E-05 | 6.70E-05 | 1607.91  | not significant |
| 2473 | AGA          | -1.15 | 2.50E-03 | 5.55E-03 | 597.76   | not significant |
| 2474 | PTPLAD2      | -1.15 | 8.53E-05 | 2.48E-04 | 1428.87  | not significant |
| 2475 | RGS18        | -1.15 | 1.23E-01 | 1.83E-01 | 51.37    | not significant |
| 2476 | NBPF3        | -1.15 | 7.83E-03 | 1.57E-02 | 447.53   | not significant |
| 2477 | ZNF106       | -1.15 | 2.67E-07 | 1.09E-06 | 2798.79  | not significant |
| 2478 | PGM2         | -1.15 | 3.82E-07 | 1.52E-06 | 2623.07  | not significant |
| 2479 | SLFN5        | -1.15 | 1.21E-06 | 4.56E-06 | 2456.90  | not significant |
| 2480 | ACTR3B       | -1.15 | 3.15E-02 | 5.51E-02 | 253.00   | not significant |
| 2481 | TGFB1        | -1.15 | 6.04E-07 | 2.34E-06 | 3494.31  | not significant |
| 2482 | YIF1A        | -1.15 | 1.41E-04 | 3.95E-04 | 1150.68  | not significant |
| 2483 | HIST1H2BL    | -1.15 | 1.14E-01 | 1.70E-01 | 24.04    | not significant |
| 2484 | NGLY1        | -1.15 | 2.38E-07 | 9.72E-07 | 2629.66  | not significant |
| 2485 | SUCLA2       | -1.15 | 8.07E-06 | 2.71E-05 | 1945.10  | not significant |
| 2486 | LOC100131691 | -1.15 | 1.03E-01 | 1.57E-01 | 88.78    | not significant |
| 2487 | FAM212A      | -1.15 | 1.20E-01 | 1.78E-01 | 59.95    | not significant |
| 2488 | PRKAG1       | -1.15 | 1.84E-06 | 6.75E-06 | 2067.82  | not significant |
| 2489 | ADCK5        | -1.15 | 7.34E-02 | 1.16E-01 | 148.88   | not significant |
| 2490 | C19orf70     | -1.15 | 1.53E-03 | 3.53E-03 | 755.35   | not significant |
| 2491 | ATP7B        | -1.15 | 8.45E-02 | 1.32E-01 | 14.63    | not significant |
| 2492 | ZNF37A       | -1.15 | 2.56E-06 | 9.22E-06 | 2061.38  | not significant |
| 2493 | CEBPZOS      | -1.15 | 7.74E-06 | 2.61E-05 | 1688.49  | not significant |
| 2494 | FAM86EP      | -1.15 | 1.18E-01 | 1.76E-01 | 67.93    | not significant |
| 2495 | DHX37        | -1.15 | 1.51E-09 | 7.85E-09 | 3934.90  | not significant |
| 2496 | DECR1        | -1.15 | 3.35E-05 | 1.03E-04 | 1809.39  | not significant |
| 2497 | FUT8-AS1     | -1.15 | 1.28E-01 | 1.89E-01 | 45.40    | not significant |
| 2498 | FAM175B      | -1.15 | 6.93E-05 | 2.04E-04 | 1218.14  | not significant |
| 2499 | DOCK10       | -1.15 | 5.03E-09 | 2.49E-08 | 3939.23  | not significant |
| 2500 | CD55         | -1.15 | 2.36E-02 | 4.25E-02 | 311.29   | not significant |
| 2501 | CCSER2       | -1.15 | 2.52E-06 | 9.06E-06 | 2033.15  | not significant |
| 2502 | CHD5         | -1.15 | 1.28E-01 | 1.89E-01 | 51.85    | not significant |
| 2503 | TMC6         | -1.15 | 1.90E-05 | 6.09E-05 | 2096.95  | not significant |
| 2504 | ALDH9A1      | -1.15 | 6.32E-07 | 2.45E-06 | 2362.25  | not significant |
| 2505 | LOC100507316 | -1.15 | 7.79E-02 | 1.23E-01 | 126.59   | not significant |
| 2506 | RFX2         | -1.15 | 9.72E-02 | 1.49E-01 | 97.85    | not significant |
| 2507 | AURKAIP1     | -1.15 | 7.21E-05 | 2.12E-04 | 2574.04  | not significant |
| 2508 | PPP1R12A     | -1.15 | 1.13E-09 | 5.95E-09 | 5532.18  | not significant |
| 2509 | PSMD10       | -1.15 | 3.49E-05 | 1.07E-04 | 1448.90  | not significant |
| 2510 | EPHX1        | -1.15 | 9.36E-02 | 1.44E-01 | 108.15   | not significant |
| 2511 | OPN3         | -1.15 | 9.13E-04 | 2.20E-03 | 855.87   | not significant |
| 2512 | SPOCD1       | -1.15 | 5.46E-02 | 8.99E-02 | 190.88   | not significant |
| 2513 | APEH         | -1.15 | 2.78E-08 | 1.27E-07 | 4046.44  | not significant |
| 2514 | GNB2         | -1.15 | 5.47E-08 | 2.42E-07 | 5408.44  | not significant |
| 2515 | DHDDS        | -1.15 | 2.72E-04 | 7.24E-04 | 1041.64  | not significant |
| 2516 | NUF2         | -1.15 | 3.58E-06 | 1.26E-05 | 2814.41  | not significant |
| 2517 | FAM58A       | -1.15 | 3.94E-02 | 6.72E-02 | 226.48   | not significant |
| 2518 | PLEKHA5      | -1.14 | 3.28E-03 | 7.12E-03 | 599.05   | not significant |
| 2519 | UBP1         | -1.14 | 9.34E-09 | 4.50E-08 | 4189.27  | not significant |
| 2520 | ACLY         | -1.14 | 2.78E-10 | 1.57E-09 | 6086.78  | not significant |
| 2521 | DGKH         | -1.14 | 5.86E-02 | 9.55E-02 | 1157.60  | not significant |
| 2522 | PIGN         | -1.14 | 4.49E-05 | 1.36E-04 | 1667.34  | not significant |
| 2523 | CCDC181      | -1.14 | 1.31E-01 | 1.92E-01 | 36.00    | not significant |
| 2524 | AMER1        | -1.14 | 2.31E-03 | 5.15E-03 | 653.49   | not significant |
| 2525 | NAA38        | -1.14 | 1.65E-03 | 3.78E-03 | 863.25   | not significant |
| 2526 | ANP32C       | -1.14 | 1.24E-01 | 1.84E-01 | 30.05    | not significant |
| 2527 | LMNB1        | -1.14 | 2.14E-12 | 1.47E-11 | 18847.54 | not significant |
| 2528 | AMOTL2       | -1.14 | 1.07E-01 | 1.62E-01 | 20.45    | not significant |
| 2529 | UBE3A        | -1.14 | 6.50E-09 | 3.17E-08 | 4375.69  | not significant |
| 2530 | ST3GAL6      | -1.14 | 6.37E-02 | 1.03E-01 | 11.09    | not significant |
| 2531 | VAV3         | -1.14 | 4.12E-05 | 1.26E-04 | 1545.88  | not significant |
| 2532 | UBE2C        | -1.14 | 2.04E-08 | 9.43E-08 | 6911.69  | not significant |
| 2533 | RPS6KA3      | -1.14 | 7.08E-10 | 3.81E-09 | 7277.67  | not significant |
| 2534 | GMFB         | -1.14 | 7.78E-06 | 2.62E-05 | 2119.18  | not significant |
| 2535 | TFAM         | -1.14 | 5.83E-08 | 2.57E-07 | 3948.21  | not significant |
| 2536 | KCNN3        | -1.14 | 3.69E-02 | 6.34E-02 | 7.66     | not significant |
| 2537 | UBA5         | -1.14 | 3.94E-06 | 1.38E-05 | 1889.98  | not significant |
| 2538 | MTERF2       | -1.14 | 6.25E-02 | 1.01E-01 | 175.88   | not significant |
| 2539 | HSPA9        | -1.14 | 1.78E-09 | 9.16E-09 | 15873.51 | not significant |
| 2540 | USP45        | -1.14 | 4.84E-03 | 1.02E-02 | 665.52   | not significant |

|      |              |       |          |          |          |                 |
|------|--------------|-------|----------|----------|----------|-----------------|
| 2541 | FUNDC2       | -1.14 | 6.50E-03 | 1.33E-02 | 656.62   | not significant |
| 2542 | NSUN6        | -1.14 | 7.86E-03 | 1.58E-02 | 503.76   | not significant |
| 2543 | CCDC66       | -1.14 | 2.73E-03 | 6.03E-03 | 814.71   | not significant |
| 2544 | TSEN54       | -1.14 | 5.17E-06 | 1.78E-05 | 2056.02  | not significant |
| 2545 | PDHX         | -1.14 | 5.55E-04 | 1.39E-03 | 944.08   | not significant |
| 2546 | SERPINB8     | -1.14 | 1.31E-01 | 1.92E-01 | 57.20    | not significant |
| 2547 | EIF4A3       | -1.14 | 1.63E-07 | 6.79E-07 | 6211.27  | not significant |
| 2548 | MFN2         | -1.14 | 1.18E-08 | 5.59E-08 | 4303.51  | not significant |
| 2549 | SIGLEC8      | -1.14 | 6.24E-02 | 1.01E-01 | 10.00    | not significant |
| 2550 | FDXR         | -1.14 | 9.97E-04 | 2.38E-03 | 786.89   | not significant |
| 2551 | SNUPN        | -1.14 | 3.82E-04 | 9.88E-04 | 1289.01  | not significant |
| 2552 | RRP1B        | -1.14 | 4.02E-09 | 2.00E-08 | 4883.58  | not significant |
| 2553 | CD70         | -1.14 | 6.43E-02 | 1.04E-01 | 164.93   | not significant |
| 2554 | PRPSAP2      | -1.14 | 9.04E-05 | 2.61E-04 | 1668.46  | not significant |
| 2555 | FKBP14       | -1.14 | 3.01E-02 | 5.29E-02 | 301.16   | not significant |
| 2556 | TMEM41A      | -1.14 | 3.01E-03 | 6.59E-03 | 671.36   | not significant |
| 2557 | PLRG1        | -1.14 | 1.35E-05 | 4.41E-05 | 2190.80  | not significant |
| 2558 | PIGT         | -1.14 | 6.72E-07 | 2.60E-06 | 2663.45  | not significant |
| 2559 | GGPS1        | -1.14 | 2.07E-04 | 5.62E-04 | 1132.58  | not significant |
| 2560 | PIGO         | -1.14 | 1.03E-03 | 2.45E-03 | 956.25   | not significant |
| 2561 | PLAG1        | -1.14 | 1.31E-01 | 1.92E-01 | 60.87    | not significant |
| 2562 | SLC27A5      | -1.14 | 3.21E-02 | 5.61E-02 | 267.18   | not significant |
| 2563 | GCF2         | -1.14 | 3.94E-04 | 1.02E-03 | 1008.67  | not significant |
| 2564 | MAGED1       | -1.14 | 3.78E-04 | 9.78E-04 | 1088.28  | not significant |
| 2565 | CCDC138      | -1.14 | 4.23E-04 | 1.09E-03 | 1084.95  | not significant |
| 2566 | SLMAP        | -1.14 | 6.35E-06 | 2.17E-05 | 2238.59  | not significant |
| 2567 | MPI          | -1.14 | 2.22E-03 | 4.96E-03 | 757.13   | not significant |
| 2568 | GLMN         | -1.14 | 6.72E-03 | 1.37E-02 | 602.40   | not significant |
| 2569 | AP2S1        | -1.14 | 2.10E-05 | 6.68E-05 | 2915.43  | not significant |
| 2570 | SETD3        | -1.14 | 5.87E-07 | 2.28E-06 | 2731.96  | not significant |
| 2571 | SLC10A7      | -1.14 | 1.85E-03 | 4.21E-03 | 743.54   | not significant |
| 2572 | GABPB1       | -1.14 | 3.06E-05 | 9.50E-05 | 1760.93  | not significant |
| 2573 | ZCCHC2       | -1.14 | 1.56E-03 | 3.61E-03 | 731.23   | not significant |
| 2574 | YWHAH        | -1.14 | 3.32E-08 | 1.50E-07 | 4756.34  | not significant |
| 2575 | SFXN4        | -1.14 | 3.50E-05 | 1.08E-04 | 1485.02  | not significant |
| 2576 | MRPL50       | -1.14 | 6.21E-03 | 1.28E-02 | 511.12   | not significant |
| 2577 | CHMP4A       | -1.14 | 8.82E-05 | 2.55E-04 | 1453.76  | not significant |
| 2578 | BAG4         | -1.14 | 3.47E-04 | 9.06E-04 | 1128.69  | not significant |
| 2579 | RGS5         | -1.14 | 1.05E-01 | 1.60E-01 | 96.58    | not significant |
| 2580 | OAZ1         | -1.14 | 2.13E-06 | 7.75E-06 | 22045.06 | not significant |
| 2581 | GPD2         | -1.14 | 2.85E-02 | 5.05E-02 | 305.34   | not significant |
| 2582 | MYL12A       | -1.14 | 9.60E-10 | 5.08E-09 | 5376.47  | not significant |
| 2583 | HSPB1        | -1.14 | 5.03E-06 | 1.74E-05 | 2749.49  | not significant |
| 2584 | APTX         | -1.14 | 1.78E-04 | 4.90E-04 | 1216.15  | not significant |
| 2585 | SYNE4        | -1.14 | 1.23E-01 | 1.82E-01 | 24.67    | not significant |
| 2586 | LIPA         | -1.14 | 6.18E-06 | 2.11E-05 | 2870.49  | not significant |
| 2587 | ALDH18A1     | -1.14 | 4.91E-10 | 2.70E-09 | 5966.83  | not significant |
| 2588 | PRPF40A      | -1.14 | 4.72E-10 | 2.60E-09 | 6611.12  | not significant |
| 2589 | HMGN2        | -1.14 | 3.73E-08 | 1.68E-07 | 14047.09 | not significant |
| 2590 | EZR          | -1.14 | 1.89E-12 | 1.30E-11 | 15338.22 | not significant |
| 2591 | ARMC9        | -1.14 | 1.13E-01 | 1.70E-01 | 89.46    | not significant |
| 2592 | SALL2        | -1.14 | 3.90E-03 | 8.36E-03 | 631.56   | not significant |
| 2593 | PSME1        | -1.14 | 4.28E-09 | 2.13E-08 | 10319.71 | not significant |
| 2594 | GTF3C4       | -1.14 | 1.57E-04 | 4.38E-04 | 1206.71  | not significant |
| 2595 | LOC100507600 | -1.14 | 9.10E-08 | 3.91E-07 | 3841.87  | not significant |
| 2596 | SNX8         | -1.14 | 4.15E-04 | 1.07E-03 | 1146.97  | not significant |
| 2597 | TCEA2        | -1.14 | 1.44E-02 | 2.73E-02 | 460.00   | not significant |
| 2598 | EFCAB13      | -1.14 | 7.34E-02 | 1.16E-01 | 157.13   | not significant |
| 2599 | KDM1A        | -1.14 | 1.03E-10 | 6.05E-10 | 7350.19  | not significant |
| 2600 | WDR7         | -1.14 | 1.70E-05 | 5.47E-05 | 1902.20  | not significant |
| 2601 | MICU1        | -1.14 | 5.08E-06 | 1.75E-05 | 2480.08  | not significant |
| 2602 | SDHC         | -1.14 | 1.95E-04 | 5.33E-04 | 1338.10  | not significant |
| 2603 | ITM2C        | -1.14 | 3.01E-07 | 1.21E-06 | 4937.44  | not significant |
| 2604 | TCERG1       | -1.14 | 6.14E-07 | 2.38E-06 | 5815.41  | not significant |
| 2605 | OCRL         | -1.14 | 7.76E-02 | 1.22E-01 | 151.34   | not significant |
| 2606 | SPTY2D1      | -1.14 | 3.28E-05 | 1.01E-04 | 1716.87  | not significant |
| 2607 | NELFE        | -1.14 | 1.01E-04 | 2.90E-04 | 1575.48  | not significant |
| 2608 | BRMS1        | -1.14 | 6.82E-06 | 2.32E-05 | 2597.01  | not significant |
| 2609 | NRD1         | -1.14 | 2.90E-10 | 1.63E-09 | 6697.83  | not significant |
| 2610 | NKRF         | -1.14 | 1.90E-04 | 5.20E-04 | 1150.26  | not significant |
| 2611 | STAMPB       | -1.14 | 4.83E-06 | 1.67E-05 | 2187.47  | not significant |
| 2612 | KNSTRN       | -1.14 | 9.68E-05 | 2.79E-04 | 1506.71  | not significant |
| 2613 | APH1B        | -1.14 | 1.48E-02 | 2.80E-02 | 405.87   | not significant |
| 2614 | KIAA0930     | -1.14 | 3.18E-06 | 1.13E-05 | 3241.44  | not significant |
| 2615 | PDE6B        | -1.14 | 1.78E-02 | 3.30E-02 | 366.50   | not significant |
| 2616 | SRSF2        | -1.14 | 6.82E-08 | 2.97E-07 | 20511.44 | not significant |
| 2617 | DDA1         | -1.14 | 9.64E-06 | 3.21E-05 | 1961.67  | not significant |
| 2618 | OSBPL11      | -1.14 | 7.17E-06 | 2.43E-05 | 1917.55  | not significant |
| 2619 | MTHFD2L      | -1.14 | 4.46E-02 | 7.51E-02 | 234.50   | not significant |
| 2620 | LOC100507424 | -1.14 | 1.34E-01 | 1.96E-01 | 63.08    | not significant |
| 2621 | LHFPL2       | -1.14 | 5.52E-02 | 9.06E-02 | 9.41     | not significant |
| 2622 | UTP23        | -1.14 | 7.14E-06 | 2.42E-05 | 2050.49  | not significant |
| 2623 | ARL5A        | -1.14 | 2.15E-06 | 7.80E-06 | 2998.30  | not significant |
| 2624 | PPHLN1       | -1.14 | 3.27E-08 | 1.48E-07 | 4110.03  | not significant |
| 2625 | TAF1A        | -1.14 | 8.81E-03 | 1.75E-02 | 536.67   | not significant |
| 2626 | COX6C        | -1.14 | 2.34E-02 | 4.22E-02 | 4181.52  | not significant |
| 2627 | RAB10        | -1.14 | 3.72E-10 | 2.07E-09 | 6596.77  | not significant |
| 2628 | WFS1         | -1.14 | 1.42E-01 | 2.07E-01 | 46.39    | not significant |

|      |            |       |          |          |          |                 |
|------|------------|-------|----------|----------|----------|-----------------|
| 2629 | C4orf29    | -1.14 | 6.34E-03 | 1.30E-02 | 659.66   | not significant |
| 2630 | LCP2       | -1.14 | 3.21E-08 | 1.46E-07 | 4299.35  | not significant |
| 2631 | SIPA1L2    | -1.14 | 1.38E-01 | 2.02E-01 | 32.64    | not significant |
| 2632 | PLIN3      | -1.14 | 2.55E-06 | 9.16E-06 | 2801.95  | not significant |
| 2633 | DNM3       | -1.14 | 1.42E-01 | 2.07E-01 | 42.71    | not significant |
| 2634 | ERMP1      | -1.14 | 2.09E-02 | 3.82E-02 | 380.28   | not significant |
| 2635 | QRSL1      | -1.14 | 1.03E-04 | 2.94E-04 | 1367.78  | not significant |
| 2636 | ABCD2      | -1.14 | 1.42E-01 | 2.07E-01 | 45.96    | not significant |
| 2637 | WWP2       | -1.14 | 1.42E-05 | 4.61E-05 | 1949.44  | not significant |
| 2638 | MTMR6      | -1.14 | 4.59E-07 | 1.81E-06 | 2863.66  | not significant |
| 2639 | DHRS7B     | -1.14 | 5.93E-02 | 9.66E-02 | 208.39   | not significant |
| 2640 | NDUFA1     | -1.14 | 2.87E-02 | 5.08E-02 | 2033.27  | not significant |
| 2641 | XRCC5      | -1.14 | 1.45E-10 | 8.39E-10 | 24516.97 | not significant |
| 2642 | LY96       | -1.14 | 9.25E-02 | 1.43E-01 | 152.14   | not significant |
| 2643 | ARPC3      | -1.14 | 3.99E-08 | 1.79E-07 | 10515.63 | not significant |
| 2644 | CNTROB     | -1.14 | 7.29E-07 | 2.80E-06 | 2807.18  | not significant |
| 2645 | NUPL2      | -1.14 | 3.95E-04 | 1.02E-03 | 1103.94  | not significant |
| 2646 | AFTPH      | -1.14 | 4.95E-04 | 1.26E-03 | 1416.28  | not significant |
| 2647 | GEMIN4     | -1.14 | 1.51E-06 | 5.61E-06 | 2488.96  | not significant |
| 2648 | TADA2A     | -1.14 | 5.47E-04 | 1.38E-03 | 1001.09  | not significant |
| 2649 | QTRTD1     | -1.14 | 8.47E-05 | 2.46E-04 | 1480.19  | not significant |
| 2650 | TESC       | -1.14 | 9.08E-07 | 3.45E-06 | 4199.51  | not significant |
| 2651 | DCTN1      | -1.14 | 5.99E-10 | 3.26E-09 | 7200.21  | not significant |
| 2652 | HAR1A      | -1.14 | 9.70E-02 | 1.49E-01 | 123.46   | not significant |
| 2653 | F2RL1      | -1.14 | 1.46E-01 | 2.11E-01 | 50.58    | not significant |
| 2654 | HDAC2      | -1.14 | 3.05E-09 | 1.54E-08 | 8386.83  | not significant |
| 2655 | TIMP1      | -1.14 | 8.06E-02 | 1.26E-01 | 155.40   | not significant |
| 2656 | ARL6IP1    | -1.14 | 2.11E-09 | 1.08E-08 | 11580.28 | not significant |
| 2657 | PDRG1      | -1.14 | 5.03E-03 | 1.05E-02 | 950.13   | not significant |
| 2658 | TOMM22     | -1.14 | 1.25E-07 | 5.28E-07 | 4576.38  | not significant |
| 2659 | DDX56      | -1.14 | 7.88E-06 | 2.65E-05 | 2820.41  | not significant |
| 2660 | SH3KBP1    | -1.14 | 5.58E-10 | 3.05E-09 | 7732.32  | not significant |
| 2661 | ZNF197-AS1 | -1.14 | 6.04E-02 | 9.81E-02 | 9.30     | not significant |
| 2662 | MED19      | -1.14 | 1.06E-02 | 2.07E-02 | 541.91   | not significant |
| 2663 | G3BP1      | -1.14 | 4.09E-09 | 2.04E-08 | 9003.74  | not significant |
| 2664 | RDH13      | -1.14 | 1.12E-01 | 1.68E-01 | 102.92   | not significant |
| 2665 | UROS       | -1.14 | 3.83E-05 | 1.17E-04 | 1644.82  | not significant |
| 2666 | CSNK2A3    | -1.14 | 1.31E-01 | 1.92E-01 | 80.81    | not significant |
| 2667 | PNPLA7     | -1.14 | 1.44E-01 | 2.09E-01 | 32.95    | not significant |
| 2668 | CANT1      | -1.14 | 2.77E-07 | 1.12E-06 | 4535.62  | not significant |
| 2669 | SGPP1      | -1.14 | 4.92E-04 | 1.25E-03 | 1360.01  | not significant |
| 2670 | RGS14      | -1.14 | 1.67E-04 | 4.63E-04 | 1392.63  | not significant |
| 2671 | ATP8B3     | -1.14 | 2.41E-03 | 5.37E-03 | 882.62   | not significant |
| 2672 | MRPL40     | -1.14 | 1.05E-02 | 2.06E-02 | 527.66   | not significant |
| 2673 | SMEK2      | -1.14 | 1.42E-08 | 6.64E-08 | 5578.50  | not significant |
| 2674 | CUTC       | -1.14 | 5.86E-03 | 1.21E-02 | 813.95   | not significant |
| 2675 | TRNT1      | -1.14 | 3.14E-04 | 8.25E-04 | 1195.47  | not significant |
| 2676 | ZNF542P    | -1.14 | 1.01E-03 | 2.41E-03 | 1038.31  | not significant |
| 2677 | KMT2C      | -1.14 | 1.05E-02 | 2.05E-02 | 3960.38  | not significant |
| 2678 | PPAT       | -1.14 | 1.54E-05 | 5.00E-05 | 2981.05  | not significant |
| 2679 | NDUFA11    | -1.14 | 1.82E-06 | 6.66E-06 | 2542.21  | not significant |
| 2680 | GPR124     | -1.14 | 5.09E-06 | 1.76E-05 | 2670.98  | not significant |
| 2681 | COMMD8     | -1.14 | 7.91E-04 | 1.93E-03 | 1063.46  | not significant |
| 2682 | TMEM14B    | -1.14 | 9.25E-05 | 2.67E-04 | 2072.95  | not significant |
| 2683 | ABHD15     | -1.13 | 1.42E-02 | 2.69E-02 | 475.33   | not significant |
| 2684 | PMFBP1     | -1.13 | 1.09E-01 | 1.64E-01 | 110.32   | not significant |
| 2685 | PDCD11     | -1.13 | 6.23E-08 | 2.73E-07 | 5398.80  | not significant |
| 2686 | FYN        | -1.13 | 1.52E-08 | 7.11E-08 | 4283.33  | not significant |
| 2687 | SRSF9      | -1.13 | 1.05E-02 | 2.05E-02 | 6517.29  | not significant |
| 2688 | U2AF1      | -1.13 | 2.41E-05 | 7.57E-05 | 3557.48  | not significant |
| 2689 | RAPGEF5    | -1.13 | 9.89E-06 | 3.28E-05 | 2133.68  | not significant |
| 2690 | FLAD1      | -1.13 | 2.12E-03 | 4.77E-03 | 758.04   | not significant |
| 2691 | MLF2       | -1.13 | 2.14E-07 | 8.77E-07 | 5452.36  | not significant |
| 2692 | CAND1      | -1.13 | 4.66E-11 | 2.83E-10 | 9805.58  | not significant |
| 2693 | SDCCAG8    | -1.13 | 1.15E-02 | 2.23E-02 | 478.21   | not significant |
| 2694 | PPP2R5E    | -1.13 | 2.96E-07 | 1.19E-06 | 3465.42  | not significant |
| 2695 | ERF        | -1.13 | 8.26E-05 | 2.40E-04 | 1774.37  | not significant |
| 2696 | PSMD5      | -1.13 | 4.86E-04 | 1.24E-03 | 1089.25  | not significant |
| 2697 | VASP       | -1.13 | 2.58E-04 | 6.91E-04 | 2071.54  | not significant |
| 2698 | SLC37A2    | -1.13 | 1.51E-01 | 2.18E-01 | 51.04    | not significant |
| 2699 | ARTN       | -1.13 | 1.33E-01 | 1.95E-01 | 23.31    | not significant |
| 2700 | ATF1       | -1.13 | 7.27E-05 | 2.13E-04 | 1625.58  | not significant |
| 2701 | SRPK1      | -1.13 | 2.17E-09 | 1.11E-08 | 6854.42  | not significant |
| 2702 | WDR33      | -1.13 | 6.77E-08 | 2.95E-07 | 4043.79  | not significant |
| 2703 | STK17A     | -1.13 | 1.74E-07 | 7.23E-07 | 3313.62  | not significant |
| 2704 | RBM26      | -1.13 | 4.42E-05 | 1.34E-04 | 3842.93  | not significant |
| 2705 | TERF1      | -1.13 | 9.12E-06 | 3.05E-05 | 2464.31  | not significant |
| 2706 | CTR9       | -1.13 | 2.57E-06 | 9.22E-06 | 4710.60  | not significant |
| 2707 | AGL        | -1.13 | 4.43E-04 | 1.13E-03 | 1788.35  | not significant |
| 2708 | SENP3      | -1.13 | 4.75E-03 | 1.00E-02 | 703.54   | not significant |
| 2709 | NAPSA      | -1.13 | 1.02E-01 | 1.56E-01 | 15.40    | not significant |
| 2710 | TSEN2      | -1.13 | 2.00E-02 | 3.67E-02 | 406.49   | not significant |
| 2711 | SLC9A1     | -1.13 | 1.51E-03 | 3.50E-03 | 946.07   | not significant |
| 2712 | ZNF18      | -1.13 | 2.60E-02 | 4.64E-02 | 339.02   | not significant |
| 2713 | ENOPH1     | -1.13 | 7.27E-07 | 2.80E-06 | 3750.80  | not significant |
| 2714 | PFKFB3     | -1.13 | 3.77E-04 | 9.78E-04 | 1145.08  | not significant |
| 2715 | SCG5       | -1.13 | 8.02E-02 | 1.26E-01 | 11.26    | not significant |
| 2716 | GINS1      | -1.13 | 2.43E-07 | 9.95E-07 | 4088.04  | not significant |

|      |            |       |          |          |          |                 |
|------|------------|-------|----------|----------|----------|-----------------|
| 2717 | IQGAP1     | -1.13 | 2.19E-09 | 1.12E-08 | 14182.22 | not significant |
| 2718 | HBS1L      | -1.13 | 1.45E-05 | 4.71E-05 | 3796.22  | not significant |
| 2719 | G3BP2      | -1.13 | 2.00E-10 | 1.14E-09 | 8209.68  | not significant |
| 2720 | RBM43      | -1.13 | 2.27E-02 | 4.11E-02 | 419.30   | not significant |
| 2721 | HSPE1      | -1.13 | 4.69E-02 | 7.85E-02 | 1465.01  | not significant |
| 2722 | SYMPK      | -1.13 | 2.32E-08 | 1.07E-07 | 4384.50  | not significant |
| 2723 | DAXX       | -1.13 | 5.99E-03 | 1.23E-02 | 617.31   | not significant |
| 2724 | TAF6L      | -1.13 | 2.55E-03 | 5.65E-03 | 833.12   | not significant |
| 2725 | EPN2       | -1.13 | 9.46E-03 | 1.87E-02 | 551.94   | not significant |
| 2726 | FDXACB1    | -1.13 | 1.50E-01 | 2.17E-01 | 32.27    | not significant |
| 2727 | LGMN       | -1.13 | 1.17E-01 | 1.74E-01 | 17.64    | not significant |
| 2728 | ZW10       | -1.13 | 2.56E-04 | 6.85E-04 | 1470.92  | not significant |
| 2729 | THUMPD2    | -1.13 | 3.76E-03 | 8.10E-03 | 712.23   | not significant |
| 2730 | RBM27      | -1.13 | 2.57E-07 | 1.05E-06 | 3387.22  | not significant |
| 2731 | PFKP       | -1.13 | 1.73E-08 | 8.04E-08 | 5681.30  | not significant |
| 2732 | TARDBP     | -1.13 | 9.46E-09 | 4.55E-08 | 8733.74  | not significant |
| 2733 | NDUFAF5    | -1.13 | 1.20E-02 | 2.31E-02 | 540.19   | not significant |
| 2734 | ZFR        | -1.13 | 2.86E-08 | 1.31E-07 | 5323.00  | not significant |
| 2735 | CAT        | -1.13 | 3.31E-07 | 1.33E-06 | 3469.33  | not significant |
| 2736 | KDM4A-AS1  | -1.13 | 1.57E-01 | 2.25E-01 | 51.27    | not significant |
| 2737 | RAD51B     | -1.13 | 3.52E-02 | 6.07E-02 | 342.08   | not significant |
| 2738 | TRAPPC2L   | -1.13 | 1.80E-03 | 4.10E-03 | 934.05   | not significant |
| 2739 | LATS2      | -1.13 | 1.55E-01 | 2.22E-01 | 40.98    | not significant |
| 2740 | RRN3       | -1.13 | 1.72E-05 | 5.54E-05 | 2184.14  | not significant |
| 2741 | CARD11     | -1.13 | 1.26E-05 | 4.12E-05 | 2877.13  | not significant |
| 2742 | DDX19A     | -1.13 | 1.20E-05 | 3.96E-05 | 2703.51  | not significant |
| 2743 | HARB1I     | -1.13 | 1.33E-01 | 1.95E-01 | 92.55    | not significant |
| 2744 | INIP       | -1.13 | 2.57E-03 | 5.70E-03 | 933.74   | not significant |
| 2745 | ABCC4      | -1.13 | 2.52E-04 | 6.74E-04 | 1303.27  | not significant |
| 2746 | DOK3       | -1.13 | 1.52E-01 | 2.19E-01 | 67.68    | not significant |
| 2747 | EMC3       | -1.13 | 1.90E-04 | 5.20E-04 | 1449.95  | not significant |
| 2748 | ORAOV1     | -1.13 | 7.60E-03 | 1.53E-02 | 599.78   | not significant |
| 2749 | TBC1D10C   | -1.13 | 2.54E-06 | 9.14E-06 | 3413.98  | not significant |
| 2750 | MRPS30     | -1.13 | 7.43E-04 | 1.82E-03 | 1053.93  | not significant |
| 2751 | GDPD1      | -1.13 | 1.08E-01 | 1.64E-01 | 125.38   | not significant |
| 2752 | MRS2       | -1.13 | 4.70E-04 | 1.20E-03 | 1673.02  | not significant |
| 2753 | ZDHHC14    | -1.13 | 1.39E-01 | 2.04E-01 | 82.46    | not significant |
| 2754 | SRSF4      | -1.13 | 6.04E-08 | 2.65E-07 | 6352.04  | not significant |
| 2755 | PIIG       | -1.13 | 2.04E-06 | 7.42E-06 | 3517.22  | not significant |
| 2756 | TSC22D3    | -1.13 | 1.45E-01 | 2.11E-01 | 26.89    | not significant |
| 2757 | TULP4      | -1.13 | 3.87E-03 | 8.32E-03 | 840.50   | not significant |
| 2758 | MAD1L1     | -1.13 | 2.77E-04 | 7.35E-04 | 1690.02  | not significant |
| 2759 | ATP6V1C1   | -1.13 | 2.90E-06 | 1.04E-05 | 3477.75  | not significant |
| 2760 | NOC3L      | -1.13 | 5.76E-04 | 1.44E-03 | 1600.81  | not significant |
| 2761 | SDHA       | -1.13 | 1.13E-06 | 4.25E-06 | 4164.47  | not significant |
| 2762 | APOBEC3F   | -1.13 | 1.55E-02 | 2.91E-02 | 552.38   | not significant |
| 2763 | PUS7L      | -1.13 | 5.98E-04 | 1.49E-03 | 1104.45  | not significant |
| 2764 | MCOLN2     | -1.13 | 1.57E-01 | 2.25E-01 | 31.37    | not significant |
| 2765 | LDLRAP1    | -1.13 | 1.26E-01 | 1.86E-01 | 20.17    | not significant |
| 2766 | UBQLN1     | -1.13 | 1.43E-08 | 6.71E-08 | 6029.65  | not significant |
| 2767 | TBC1D22B   | -1.13 | 1.24E-05 | 4.08E-05 | 2179.74  | not significant |
| 2768 | REEP3      | -1.13 | 6.30E-04 | 1.56E-03 | 1206.83  | not significant |
| 2769 | MDH1       | -1.13 | 1.40E-06 | 5.23E-06 | 6493.69  | not significant |
| 2770 | UPF2       | -1.13 | 5.88E-05 | 1.76E-04 | 1943.87  | not significant |
| 2771 | M6PR       | -1.13 | 1.04E-06 | 3.94E-06 | 4261.94  | not significant |
| 2772 | TFB2M      | -1.13 | 3.96E-03 | 8.49E-03 | 771.38   | not significant |
| 2773 | 43715_9262 | -1.13 | 1.18E-08 | 5.62E-08 | 11256.85 | not significant |
| 2774 | SEC24D     | -1.13 | 4.92E-05 | 1.48E-04 | 1828.93  | not significant |
| 2775 | SYDE2      | -1.13 | 9.14E-02 | 1.41E-01 | 182.40   | not significant |
| 2776 | GPN3       | -1.13 | 2.32E-04 | 6.26E-04 | 1687.63  | not significant |
| 2777 | KCTD5      | -1.13 | 5.04E-04 | 1.28E-03 | 1585.65  | not significant |
| 2778 | C6orf1     | -1.13 | 2.78E-02 | 4.93E-02 | 387.18   | not significant |
| 2779 | FAM32A     | -1.13 | 3.33E-06 | 1.18E-05 | 3375.12  | not significant |
| 2780 | C1orf61    | -1.13 | 1.27E-01 | 1.88E-01 | 17.95    | not significant |
| 2781 | TCF25      | -1.13 | 1.24E-05 | 4.07E-05 | 2756.27  | not significant |
| 2782 | SPATA2     | -1.13 | 3.45E-03 | 7.47E-03 | 792.24   | not significant |
| 2783 | RPS6KB2    | -1.13 | 6.77E-06 | 2.30E-05 | 2466.93  | not significant |
| 2784 | SZRD1      | -1.13 | 1.33E-07 | 5.58E-07 | 7143.89  | not significant |
| 2785 | TSR2       | -1.13 | 9.40E-04 | 2.26E-03 | 1590.95  | not significant |
| 2786 | PAAF1      | -1.13 | 8.84E-03 | 1.75E-02 | 636.45   | not significant |
| 2787 | GUCY1A3    | -1.13 | 4.53E-03 | 9.59E-03 | 756.80   | not significant |
| 2788 | ATG7       | -1.13 | 1.38E-02 | 2.62E-02 | 498.59   | not significant |
| 2789 | NUDT4      | -1.13 | 1.62E-01 | 2.32E-01 | 63.46    | not significant |
| 2790 | HIST1H2BF  | -1.13 | 1.54E-01 | 2.21E-01 | 28.30    | not significant |
| 2791 | ARMCX5     | -1.13 | 6.02E-03 | 1.24E-02 | 652.74   | not significant |
| 2792 | STMN3      | -1.13 | 1.44E-06 | 5.36E-06 | 3516.78  | not significant |
| 2793 | CCRL2      | -1.13 | 7.60E-02 | 1.20E-01 | 192.49   | not significant |
| 2794 | TRIB3      | -1.13 | 5.94E-04 | 1.48E-03 | 1244.69  | not significant |
| 2795 | MIS12      | -1.13 | 4.22E-05 | 1.29E-04 | 1978.06  | not significant |
| 2796 | RRP1       | -1.13 | 2.10E-03 | 4.73E-03 | 915.26   | not significant |
| 2797 | APOM       | -1.13 | 1.64E-01 | 2.34E-01 | 38.70    | not significant |
| 2798 | RIOK2      | -1.13 | 3.56E-04 | 9.27E-04 | 1519.63  | not significant |
| 2799 | HNRNPR     | -1.13 | 2.86E-08 | 1.30E-07 | 19171.17 | not significant |
| 2800 | DUSP19     | -1.13 | 1.11E-01 | 1.67E-01 | 140.35   | not significant |
| 2801 | STAG3      | -1.13 | 2.39E-02 | 4.30E-02 | 426.26   | not significant |
| 2802 | RAB7A      | -1.13 | 3.52E-07 | 1.41E-06 | 8786.30  | not significant |
| 2803 | DHFR       | -1.13 | 8.50E-07 | 3.24E-06 | 4693.91  | not significant |
| 2804 | FGGY       | -1.13 | 6.72E-02 | 1.08E-01 | 229.14   | not significant |



|      |              |       |          |          |          |                 |
|------|--------------|-------|----------|----------|----------|-----------------|
| 2805 | HCFC1R1      | -1.13 | 2.60E-02 | 4.64E-02 | 432.40   | not significant |
| 2806 | RAD51C       | -1.13 | 2.22E-05 | 7.04E-05 | 2418.34  | not significant |
| 2807 | LINC00659    | -1.13 | 1.43E-01 | 2.09E-01 | 86.32    | not significant |
| 2808 | NACC1        | -1.13 | 4.97E-05 | 1.50E-04 | 5163.87  | not significant |
| 2809 | TNRC6C-AS1   | -1.13 | 9.30E-02 | 1.43E-01 | 171.19   | not significant |
| 2810 | TOP2B        | -1.13 | 2.06E-08 | 9.54E-08 | 15168.70 | not significant |
| 2811 | RLIM         | -1.13 | 7.58E-05 | 2.22E-04 | 2558.68  | not significant |
| 2812 | SNTB1        | -1.13 | 1.28E-01 | 1.90E-01 | 121.18   | not significant |
| 2813 | NOL7         | -1.13 | 1.66E-04 | 4.59E-04 | 1872.23  | not significant |
| 2814 | UBE2J2       | -1.13 | 4.10E-05 | 1.25E-04 | 2616.91  | not significant |
| 2815 | TGM1         | -1.13 | 1.67E-01 | 2.38E-01 | 38.15    | not significant |
| 2816 | PEAK1        | -1.13 | 2.12E-03 | 4.78E-03 | 1153.98  | not significant |
| 2817 | PTGES3       | -1.13 | 4.68E-06 | 1.63E-05 | 22235.66 | not significant |
| 2818 | RIC8A        | -1.13 | 1.15E-06 | 4.31E-06 | 3446.37  | not significant |
| 2819 | THYN1        | -1.13 | 5.21E-04 | 1.32E-03 | 1747.14  | not significant |
| 2820 | RPL23        | -1.13 | 1.49E-05 | 4.83E-05 | 20513.13 | not significant |
| 2821 | MTFR1L       | -1.13 | 9.90E-04 | 2.37E-03 | 1077.47  | not significant |
| 2822 | ZC3H11A      | -1.13 | 5.00E-08 | 2.22E-07 | 5526.11  | not significant |
| 2823 | LOC101927021 | -1.13 | 1.13E-01 | 1.69E-01 | 147.20   | not significant |
| 2824 | PIM3         | -1.13 | 8.34E-05 | 2.43E-04 | 2230.15  | not significant |
| 2825 | SHOC2        | -1.13 | 8.93E-05 | 2.58E-04 | 1967.40  | not significant |
| 2826 | TMEM126B     | -1.13 | 1.47E-03 | 3.41E-03 | 1061.33  | not significant |
| 2827 | ERV3-1       | -1.13 | 4.53E-02 | 7.62E-02 | 428.17   | not significant |
| 2828 | NPIP5        | -1.13 | 1.25E-01 | 1.85E-01 | 144.10   | not significant |
| 2829 | YIPF1        | -1.13 | 4.06E-03 | 8.67E-03 | 825.35   | not significant |
| 2830 | RHOG         | -1.13 | 5.68E-05 | 1.70E-04 | 3886.21  | not significant |
| 2831 | KIRREL       | -1.13 | 1.03E-04 | 2.96E-04 | 1694.46  | not significant |
| 2832 | CDC23        | -1.13 | 1.94E-06 | 7.08E-06 | 3150.21  | not significant |
| 2833 | TRIAP1       | -1.13 | 5.50E-04 | 1.38E-03 | 1675.77  | not significant |
| 2834 | ATP5F1       | -1.13 | 7.72E-07 | 2.95E-06 | 6424.09  | not significant |
| 2835 | FAM78A       | -1.13 | 6.67E-04 | 1.65E-03 | 1365.87  | not significant |
| 2836 | TAF9B        | -1.13 | 3.48E-02 | 6.02E-02 | 346.42   | not significant |
| 2837 | EIF1AX       | -1.13 | 8.76E-06 | 2.93E-05 | 2625.95  | not significant |
| 2838 | TMX2         | -1.13 | 1.40E-05 | 4.56E-05 | 2465.07  | not significant |
| 2839 | SPNS2        | -1.13 | 1.61E-01 | 2.30E-01 | 89.96    | not significant |
| 2840 | FNDC3B       | -1.13 | 7.64E-02 | 1.21E-01 | 236.06   | not significant |
| 2841 | APOL6        | -1.13 | 3.93E-07 | 1.56E-06 | 5484.23  | not significant |
| 2842 | GNPDA1       | -1.13 | 3.85E-06 | 1.35E-05 | 3121.38  | not significant |
| 2843 | C2orf44      | -1.13 | 3.88E-04 | 1.00E-03 | 1495.75  | not significant |
| 2844 | DENND1A      | -1.13 | 1.50E-03 | 3.47E-03 | 983.33   | not significant |
| 2845 | TMEM33       | -1.13 | 9.11E-07 | 3.46E-06 | 3871.92  | not significant |
| 2846 | MELK         | -1.13 | 1.54E-06 | 5.71E-06 | 3999.38  | not significant |
| 2847 | ALG6         | -1.13 | 3.01E-04 | 7.93E-04 | 1426.10  | not significant |
| 2848 | FRMPD2       | -1.13 | 1.09E-01 | 1.64E-01 | 14.62    | not significant |
| 2849 | GTF2A1       | -1.13 | 1.50E-07 | 6.29E-07 | 4776.88  | not significant |
| 2850 | CLTB         | -1.12 | 7.53E-04 | 1.84E-03 | 1431.70  | not significant |
| 2851 | SLAIN1       | -1.12 | 4.65E-05 | 1.40E-04 | 2230.76  | not significant |
| 2852 | RGCC         | -1.12 | 5.20E-03 | 1.09E-02 | 771.71   | not significant |
| 2853 | MRPL42       | -1.12 | 2.40E-06 | 8.65E-06 | 3312.39  | not significant |
| 2854 | STRBP        | -1.12 | 2.36E-05 | 7.42E-05 | 3203.77  | not significant |
| 2855 | ANAPC5       | -1.12 | 1.64E-07 | 6.81E-07 | 5834.96  | not significant |
| 2856 | PRPS1        | -1.12 | 1.80E-05 | 5.77E-05 | 2913.84  | not significant |
| 2857 | PIAS3        | -1.12 | 1.02E-01 | 1.55E-01 | 166.91   | not significant |
| 2858 | ARRDC4       | -1.12 | 1.74E-01 | 2.46E-01 | 38.96    | not significant |
| 2859 | EFR3A        | -1.12 | 7.28E-08 | 3.15E-07 | 5541.93  | not significant |
| 2860 | SSSCA1       | -1.12 | 1.39E-02 | 2.64E-02 | 622.49   | not significant |
| 2861 | CYTIP        | -1.12 | 7.22E-02 | 1.15E-01 | 8.78     | not significant |
| 2862 | CHST15       | -1.12 | 5.71E-02 | 9.32E-02 | 8.08     | not significant |
| 2863 | TBPL1        | -1.12 | 4.73E-03 | 9.98E-03 | 834.87   | not significant |
| 2864 | DPM2         | -1.12 | 1.05E-03 | 2.50E-03 | 1114.95  | not significant |
| 2865 | PREP         | -1.12 | 3.83E-06 | 1.35E-05 | 2957.50  | not significant |
| 2866 | C11orf96     | -1.12 | 1.30E-01 | 1.91E-01 | 126.48   | not significant |
| 2867 | C1orf174     | -1.12 | 2.43E-04 | 6.51E-04 | 1481.22  | not significant |
| 2868 | SERPIN1      | -1.12 | 1.67E-01 | 2.38E-01 | 32.30    | not significant |
| 2869 | BYSL         | -1.12 | 6.40E-05 | 1.90E-04 | 2038.94  | not significant |
| 2870 | APOL3        | -1.12 | 4.51E-04 | 1.15E-03 | 1432.98  | not significant |
| 2871 | TSPAN2       | -1.12 | 5.54E-02 | 9.10E-02 | 267.18   | not significant |
| 2872 | MIF4GD       | -1.12 | 5.91E-04 | 1.47E-03 | 1390.03  | not significant |
| 2873 | MREG         | -1.12 | 8.82E-03 | 1.75E-02 | 650.50   | not significant |
| 2874 | ARHGAP12     | -1.12 | 1.23E-02 | 2.36E-02 | 591.90   | not significant |
| 2875 | LINC01128    | -1.12 | 2.09E-02 | 3.81E-02 | 482.16   | not significant |
| 2876 | TMEM198B     | -1.12 | 3.21E-02 | 5.61E-02 | 615.58   | not significant |
| 2877 | GPS2         | -1.12 | 5.51E-05 | 1.65E-04 | 2001.85  | not significant |
| 2878 | RNF4         | -1.12 | 1.59E-05 | 5.13E-05 | 3888.57  | not significant |
| 2879 | TBL1X        | -1.12 | 6.38E-05 | 1.89E-04 | 2273.88  | not significant |
| 2880 | ATP13A1      | -1.12 | 2.08E-05 | 6.60E-05 | 2861.01  | not significant |
| 2881 | C6orf57      | -1.12 | 7.22E-02 | 1.15E-01 | 236.40   | not significant |
| 2882 | FDFT1        | -1.12 | 9.37E-09 | 4.51E-08 | 15250.71 | not significant |
| 2883 | COMMD7       | -1.12 | 1.04E-04 | 2.96E-04 | 2083.04  | not significant |
| 2884 | JMJD8        | -1.12 | 1.01E-03 | 2.40E-03 | 1295.75  | not significant |
| 2885 | HSD17B8      | -1.12 | 5.34E-02 | 8.80E-02 | 296.15   | not significant |
| 2886 | TMEM55A      | -1.12 | 2.44E-02 | 4.39E-02 | 447.36   | not significant |
| 2887 | WBSR22       | -1.12 | 7.61E-04 | 1.85E-03 | 1528.46  | not significant |
| 2888 | RAP2C        | -1.12 | 3.78E-04 | 9.81E-04 | 1652.27  | not significant |
| 2889 | VARS2        | -1.12 | 7.40E-04 | 1.81E-03 | 1224.64  | not significant |
| 2890 | APOPT1       | -1.12 | 3.88E-03 | 8.33E-03 | 986.54   | not significant |
| 2891 | SH2D3A       | -1.12 | 1.54E-01 | 2.22E-01 | 88.38    | not significant |
| 2892 | MRPL38       | -1.12 | 1.03E-04 | 2.95E-04 | 3078.11  | not significant |

|      |            |       |          |          |          |                 |
|------|------------|-------|----------|----------|----------|-----------------|
| 2893 | DNAAF2     | -1.12 | 2.78E-02 | 4.94E-02 | 410.38   | not significant |
| 2894 | CAPN15     | -1.12 | 5.80E-06 | 1.99E-05 | 3133.14  | not significant |
| 2895 | STAG3L5P   | -1.12 | 1.51E-01 | 2.17E-01 | 20.48    | not significant |
| 2896 | PLOD1      | -1.12 | 2.97E-03 | 6.50E-03 | 891.83   | not significant |
| 2897 | SLC44A1    | -1.12 | 1.19E-02 | 2.29E-02 | 640.26   | not significant |
| 2898 | IMPA1      | -1.12 | 1.27E-04 | 3.57E-04 | 1816.99  | not significant |
| 2899 | ATL2       | -1.12 | 2.61E-06 | 9.36E-06 | 3391.85  | not significant |
| 2900 | EXTL2      | -1.12 | 3.86E-03 | 8.28E-03 | 891.66   | not significant |
| 2901 | C6orf120   | -1.12 | 1.77E-03 | 4.04E-03 | 1294.15  | not significant |
| 2902 | TRAF3IP3   | -1.12 | 4.94E-06 | 1.71E-05 | 3459.54  | not significant |
| 2903 | OTOF       | -1.12 | 8.30E-02 | 1.30E-01 | 9.57     | not significant |
| 2904 | MAPK6      | -1.12 | 1.38E-06 | 5.14E-06 | 3818.74  | not significant |
| 2905 | DNAJA2     | -1.12 | 3.58E-05 | 1.10E-04 | 3118.77  | not significant |
| 2906 | ACBD6      | -1.12 | 1.53E-04 | 4.26E-04 | 1774.14  | not significant |
| 2907 | TGS1       | -1.12 | 1.04E-05 | 3.44E-05 | 2970.07  | not significant |
| 2908 | PURA       | -1.12 | 9.67E-04 | 2.32E-03 | 1285.46  | not significant |
| 2909 | ACTR3C     | -1.12 | 1.25E-01 | 1.85E-01 | 17.04    | not significant |
| 2910 | PYCRL      | -1.12 | 6.77E-02 | 1.08E-01 | 354.04   | not significant |
| 2911 | DEXI       | -1.12 | 8.99E-03 | 1.78E-02 | 715.35   | not significant |
| 2912 | DYNC1LI1   | -1.12 | 1.20E-04 | 3.39E-04 | 2119.36  | not significant |
| 2913 | PYROXD1    | -1.12 | 4.23E-02 | 7.16E-02 | 364.72   | not significant |
| 2914 | DHX16      | -1.12 | 6.36E-03 | 1.30E-02 | 715.05   | not significant |
| 2915 | EYA3       | -1.12 | 4.44E-04 | 1.14E-03 | 1739.82  | not significant |
| 2916 | PITRM1     | -1.12 | 8.29E-06 | 2.78E-05 | 2900.93  | not significant |
| 2917 | DHX33      | -1.12 | 3.91E-05 | 1.20E-04 | 2743.75  | not significant |
| 2918 | ERAL1      | -1.12 | 1.87E-04 | 5.12E-04 | 1827.31  | not significant |
| 2919 | TMEM44-AS1 | -1.12 | 1.74E-01 | 2.46E-01 | 29.08    | not significant |
| 2920 | SUV39H2    | -1.12 | 8.58E-05 | 2.49E-04 | 1866.33  | not significant |
| 2921 | RRP7A      | -1.12 | 3.85E-06 | 1.35E-05 | 5927.62  | not significant |
| 2922 | RIN1       | -1.12 | 1.48E-01 | 2.15E-01 | 20.23    | not significant |
| 2923 | CCNH       | -1.12 | 5.02E-03 | 1.05E-02 | 843.38   | not significant |
| 2924 | PIGF       | -1.12 | 2.92E-02 | 5.16E-02 | 491.50   | not significant |
| 2925 | ZMAT3      | -1.12 | 2.30E-04 | 6.21E-04 | 3018.13  | not significant |
| 2926 | URI1       | -1.12 | 2.67E-06 | 9.56E-06 | 3487.94  | not significant |
| 2927 | FAM83D     | -1.12 | 3.12E-03 | 6.81E-03 | 1024.52  | not significant |
| 2928 | SERAC1     | -1.12 | 4.28E-02 | 7.22E-02 | 349.86   | not significant |
| 2929 | IKBKAP     | -1.12 | 4.87E-05 | 1.47E-04 | 2283.74  | not significant |
| 2930 | EPRS       | -1.12 | 2.54E-06 | 9.14E-06 | 6491.57  | not significant |
| 2931 | BUB1B      | -1.12 | 2.50E-06 | 9.00E-06 | 3992.37  | not significant |
| 2932 | CENPI      | -1.12 | 8.44E-03 | 1.68E-02 | 732.44   | not significant |
| 2933 | PRPF3      | -1.12 | 8.97E-02 | 1.39E-01 | 928.95   | not significant |
| 2934 | NTHL1      | -1.12 | 9.80E-03 | 1.93E-02 | 723.16   | not significant |
| 2935 | ACTL6A     | -1.12 | 1.34E-06 | 5.00E-06 | 3476.00  | not significant |
| 2936 | FAM120B    | -1.12 | 2.70E-04 | 7.19E-04 | 1757.52  | not significant |
| 2937 | CMTM4      | -1.12 | 1.70E-01 | 2.41E-01 | 78.16    | not significant |
| 2938 | TMOD3      | -1.12 | 6.16E-06 | 2.11E-05 | 3264.88  | not significant |
| 2939 | PIK3R1     | -1.12 | 3.34E-07 | 1.34E-06 | 5509.55  | not significant |
| 2940 | CENPP      | -1.12 | 8.83E-03 | 1.75E-02 | 702.46   | not significant |
| 2941 | TLN1       | -1.12 | 2.59E-02 | 4.63E-02 | 14904.83 | not significant |
| 2942 | MCM7       | -1.12 | 3.75E-10 | 2.08E-09 | 24102.62 | not significant |
| 2943 | RNF166     | -1.12 | 8.47E-04 | 2.05E-03 | 1337.82  | not significant |
| 2944 | RPL36AL    | -1.12 | 3.22E-04 | 8.44E-04 | 4202.49  | not significant |
| 2945 | PRRC2C     | -1.12 | 6.72E-02 | 1.08E-01 | 15743.40 | not significant |
| 2946 | PLEC       | -1.12 | 9.96E-02 | 1.52E-01 | 205.83   | not significant |
| 2947 | PYCR2      | -1.12 | 4.15E-06 | 1.45E-05 | 4524.35  | not significant |
| 2948 | CASC14     | -1.12 | 1.86E-01 | 2.60E-01 | 55.19    | not significant |
| 2949 | MED26      | -1.12 | 1.76E-02 | 3.27E-02 | 572.07   | not significant |
| 2950 | PDHB       | -1.12 | 1.15E-04 | 3.25E-04 | 2510.28  | not significant |
| 2951 | STAR4      | -1.12 | 2.32E-04 | 6.25E-04 | 1737.95  | not significant |
| 2952 | MOB3C      | -1.12 | 1.26E-01 | 1.87E-01 | 138.79   | not significant |
| 2953 | PDCD6      | -1.12 | 1.58E-04 | 4.39E-04 | 2590.76  | not significant |
| 2954 | DEK        | -1.12 | 2.05E-06 | 7.48E-06 | 18322.30 | not significant |
| 2955 | GAPVD1     | -1.12 | 3.89E-04 | 1.01E-03 | 2123.43  | not significant |
| 2956 | EAF2       | -1.12 | 1.68E-01 | 2.39E-01 | 82.17    | not significant |
| 2957 | NOP14      | -1.12 | 2.73E-07 | 1.11E-06 | 4713.03  | not significant |
| 2958 | CEP70      | -1.12 | 2.32E-05 | 7.32E-05 | 2513.23  | not significant |
| 2959 | GPR160     | -1.12 | 5.98E-02 | 9.72E-02 | 285.34   | not significant |
| 2960 | SRSF10     | -1.12 | 7.09E-04 | 1.74E-03 | 1406.08  | not significant |
| 2961 | SCAMP3     | -1.12 | 2.15E-03 | 4.84E-03 | 1356.46  | not significant |
| 2962 | LOC653712  | -1.12 | 1.56E-01 | 2.24E-01 | 20.13    | not significant |
| 2963 | ASIC3      | -1.12 | 1.88E-01 | 2.62E-01 | 49.01    | not significant |
| 2964 | ZNF544     | -1.12 | 1.13E-03 | 2.68E-03 | 1613.80  | not significant |
| 2965 | EHD1       | -1.12 | 1.29E-05 | 4.22E-05 | 3604.40  | not significant |
| 2966 | CHEK2      | -1.12 | 1.81E-03 | 4.12E-03 | 1096.32  | not significant |
| 2967 | TMA16      | -1.12 | 8.44E-04 | 2.05E-03 | 1440.07  | not significant |
| 2968 | RAB14      | -1.12 | 3.96E-05 | 1.21E-04 | 2429.99  | not significant |
| 2969 | PIK3R4     | -1.12 | 1.50E-04 | 4.19E-04 | 1870.47  | not significant |
| 2970 | NME7       | -1.12 | 3.53E-02 | 6.09E-02 | 432.02   | not significant |
| 2971 | EDEM3      | -1.12 | 1.71E-06 | 6.28E-06 | 4324.93  | not significant |
| 2972 | TMCO1      | -1.12 | 2.83E-06 | 1.01E-05 | 6439.54  | not significant |
| 2973 | NSF        | -1.12 | 3.42E-04 | 8.92E-04 | 1524.91  | not significant |
| 2974 | PROSER1    | -1.12 | 7.31E-07 | 2.81E-06 | 4875.72  | not significant |
| 2975 | SMARCA2    | -1.12 | 1.05E-01 | 1.59E-01 | 181.98   | not significant |
| 2976 | LOH12CR1   | -1.12 | 8.35E-02 | 1.30E-01 | 233.37   | not significant |
| 2977 | ELOF1      | -1.12 | 1.07E-03 | 2.54E-03 | 1373.38  | not significant |
| 2978 | UTP18      | -1.12 | 8.19E-05 | 2.38E-04 | 2513.16  | not significant |
| 2979 | EMC6       | -1.12 | 4.91E-03 | 1.03E-02 | 1195.45  | not significant |
| 2980 | CDC26      | -1.12 | 1.15E-01 | 1.72E-01 | 169.52   | not significant |

|      |              |       |          |          |          |                 |
|------|--------------|-------|----------|----------|----------|-----------------|
| 2981 | XRR1         | -1.12 | 5.33E-03 | 1.11E-02 | 996.48   | not significant |
| 2982 | CITED2       | -1.12 | 1.46E-02 | 2.77E-02 | 581.05   | not significant |
| 2983 | NBPF15       | -1.12 | 1.81E-01 | 2.54E-01 | 27.67    | not significant |
| 2984 | PPFIA3       | -1.12 | 8.66E-02 | 1.35E-01 | 232.53   | not significant |
| 2985 | INPP4A       | -1.12 | 3.45E-05 | 1.06E-04 | 2936.99  | not significant |
| 2986 | 43709_19983  | -1.12 | 5.20E-07 | 2.04E-06 | 6758.31  | not significant |
| 2987 | NT5C3B       | -1.12 | 1.45E-02 | 2.75E-02 | 741.77   | not significant |
| 2988 | PRMT6        | -1.12 | 1.97E-03 | 4.46E-03 | 1218.92  | not significant |
| 2989 | C17orf75     | -1.12 | 2.30E-03 | 5.14E-03 | 1248.91  | not significant |
| 2990 | C21orf67     | -1.12 | 1.22E-01 | 1.82E-01 | 157.02   | not significant |
| 2991 | NABP2        | -1.12 | 1.29E-04 | 3.62E-04 | 2591.30  | not significant |
| 2992 | DPAGT1       | -1.12 | 4.77E-04 | 1.21E-03 | 1573.92  | not significant |
| 2993 | TNFAIP1      | -1.12 | 1.66E-01 | 2.37E-01 | 95.44    | not significant |
| 2994 | RAD23A       | -1.12 | 1.06E-06 | 4.00E-06 | 5086.37  | not significant |
| 2995 | SOD1         | -1.12 | 3.31E-05 | 1.02E-04 | 7795.55  | not significant |
| 2996 | RBM3         | -1.12 | 1.58E-04 | 4.38E-04 | 2006.55  | not significant |
| 2997 | DNTTIP1      | -1.12 | 1.13E-03 | 2.68E-03 | 1355.24  | not significant |
| 2998 | FAM35A       | -1.12 | 1.85E-03 | 4.20E-03 | 1297.76  | not significant |
| 2999 | CDCA4        | -1.12 | 1.15E-04 | 3.27E-04 | 2277.50  | not significant |
| 3000 | F3           | -1.12 | 1.19E-01 | 1.77E-01 | 12.78    | not significant |
| 3001 | IDH3B        | -1.12 | 3.07E-05 | 9.52E-05 | 3280.39  | not significant |
| 3002 | TFDP1        | -1.12 | 4.95E-07 | 1.94E-06 | 11113.99 | not significant |
| 3003 | GUCA1B       | -1.12 | 1.80E-01 | 2.54E-01 | 83.51    | not significant |
| 3004 | ANGEL1       | -1.12 | 7.22E-03 | 1.46E-02 | 805.14   | not significant |
| 3005 | ANP32A       | -1.12 | 3.11E-06 | 1.11E-05 | 7469.17  | not significant |
| 3006 | TMEM128      | -1.12 | 2.02E-02 | 3.71E-02 | 548.68   | not significant |
| 3007 | JUNB         | -1.12 | 1.79E-04 | 4.93E-04 | 2545.84  | not significant |
| 3008 | TOM1         | -1.12 | 5.16E-03 | 1.08E-02 | 866.01   | not significant |
| 3009 | FBXO41       | -1.12 | 4.78E-04 | 1.22E-03 | 2536.12  | not significant |
| 3010 | TEX261       | -1.12 | 5.09E-02 | 8.44E-02 | 384.26   | not significant |
| 3011 | SLC20A2      | -1.12 | 3.85E-04 | 9.96E-04 | 1798.50  | not significant |
| 3012 | PSMD6-AS2    | -1.12 | 1.98E-01 | 2.74E-01 | 47.22    | not significant |
| 3013 | RNF157       | -1.12 | 9.74E-06 | 3.24E-05 | 3501.66  | not significant |
| 3014 | P4HA1        | -1.12 | 4.73E-04 | 1.21E-03 | 1727.56  | not significant |
| 3015 | USP25        | -1.12 | 2.82E-05 | 8.79E-05 | 2772.73  | not significant |
| 3016 | PARG         | -1.12 | 8.98E-03 | 1.78E-02 | 784.13   | not significant |
| 3017 | MYADM        | -1.12 | 1.40E-03 | 3.27E-03 | 1394.17  | not significant |
| 3018 | CCZ1         | -1.12 | 1.60E-01 | 2.29E-01 | 112.32   | not significant |
| 3019 | ALDH3A2      | -1.12 | 1.31E-01 | 1.93E-01 | 14.77    | not significant |
| 3020 | FAM200A      | -1.12 | 4.07E-02 | 6.90E-02 | 389.41   | not significant |
| 3021 | SF3A3        | -1.12 | 1.03E-06 | 3.90E-06 | 6968.80  | not significant |
| 3022 | TOLLIP-AS1   | -1.12 | 1.71E-01 | 2.42E-01 | 23.54    | not significant |
| 3023 | ANKRD40      | -1.12 | 6.63E-05 | 1.96E-04 | 3057.80  | not significant |
| 3024 | SPTA1        | -1.12 | 5.72E-02 | 9.34E-02 | 350.74   | not significant |
| 3025 | COX19        | -1.12 | 2.14E-03 | 4.80E-03 | 1451.90  | not significant |
| 3026 | PPP4C        | -1.12 | 8.28E-06 | 2.78E-05 | 4622.62  | not significant |
| 3027 | LOC100419583 | -1.12 | 1.32E-02 | 2.53E-02 | 672.38   | not significant |
| 3028 | INAFM2       | -1.12 | 5.86E-02 | 9.55E-02 | 315.54   | not significant |
| 3029 | SLC25A25-AS1 | -1.12 | 1.21E-01 | 1.80E-01 | 248.45   | not significant |
| 3030 | TUBGCP2      | -1.12 | 6.79E-05 | 2.00E-04 | 2361.72  | not significant |
| 3031 | BRWD3        | -1.12 | 1.18E-02 | 2.28E-02 | 761.53   | not significant |
| 3032 | TTC21A       | -1.12 | 1.07E-01 | 1.61E-01 | 10.80    | not significant |
| 3033 | CAMTA1       | -1.12 | 9.35E-03 | 1.85E-02 | 769.65   | not significant |
| 3034 | ARV1         | -1.12 | 1.07E-02 | 2.08E-02 | 754.54   | not significant |
| 3035 | YIF1B        | -1.12 | 1.80E-03 | 4.09E-03 | 1645.80  | not significant |
| 3036 | EML4         | -1.12 | 2.35E-04 | 6.33E-04 | 2500.23  | not significant |
| 3037 | RBM33        | -1.12 | 1.68E-04 | 4.65E-04 | 4504.27  | not significant |
| 3038 | STXBP2       | -1.11 | 5.62E-04 | 1.41E-03 | 1486.51  | not significant |
| 3039 | PDE12        | -1.11 | 2.15E-04 | 5.82E-04 | 1981.25  | not significant |
| 3040 | NUP155       | -1.11 | 3.92E-05 | 1.20E-04 | 2701.64  | not significant |
| 3041 | DBT          | -1.11 | 3.43E-03 | 7.43E-03 | 1186.83  | not significant |
| 3042 | SORBS2       | -1.11 | 1.08E-01 | 1.63E-01 | 191.72   | not significant |
| 3043 | CSGALNACT1   | -1.11 | 1.11E-01 | 1.67E-01 | 11.28    | not significant |
| 3044 | SNRPB2       | -1.11 | 2.86E-05 | 8.91E-05 | 4070.62  | not significant |
| 3045 | PIK3R2       | -1.11 | 2.23E-04 | 6.03E-04 | 1959.21  | not significant |
| 3046 | UBE4A        | -1.11 | 1.39E-03 | 3.25E-03 | 1385.65  | not significant |
| 3047 | PFKFB1       | -1.11 | 1.71E-01 | 2.42E-01 | 21.52    | not significant |
| 3048 | IL20RB       | -1.11 | 1.99E-01 | 2.75E-01 | 39.91    | not significant |
| 3049 | FH           | -1.11 | 6.98E-05 | 2.05E-04 | 2700.13  | not significant |
| 3050 | ADA          | -1.11 | 8.26E-08 | 3.56E-07 | 23796.17 | not significant |
| 3051 | CHCHD7       | -1.11 | 6.49E-04 | 1.60E-03 | 1708.62  | not significant |
| 3052 | HTT          | -1.11 | 3.06E-04 | 8.06E-04 | 3924.41  | not significant |
| 3053 | ADAM19       | -1.11 | 3.04E-06 | 1.08E-05 | 4519.17  | not significant |
| 3054 | UBXN2B       | -1.11 | 1.89E-04 | 5.16E-04 | 2141.74  | not significant |
| 3055 | PRR14        | -1.11 | 7.15E-04 | 1.75E-03 | 1763.26  | not significant |
| 3056 | PTPN12       | -1.11 | 2.02E-01 | 2.79E-01 | 59.53    | not significant |
| 3057 | SNHG17       | -1.11 | 2.13E-02 | 3.89E-02 | 551.65   | not significant |
| 3058 | LRP8         | -1.11 | 1.07E-03 | 2.54E-03 | 2618.19  | not significant |
| 3059 | NNT          | -1.11 | 8.83E-07 | 3.36E-06 | 6470.76  | not significant |
| 3060 | PCID2        | -1.11 | 4.84E-05 | 1.46E-04 | 2480.63  | not significant |
| 3061 | MAP6D1       | -1.11 | 2.03E-01 | 2.81E-01 | 53.25    | not significant |
| 3062 | CRIPAK       | -1.11 | 1.40E-01 | 2.04E-01 | 165.95   | not significant |
| 3063 | RRBP1        | -1.11 | 7.21E-03 | 1.46E-02 | 884.88   | not significant |
| 3064 | WDR53        | -1.11 | 3.16E-02 | 5.52E-02 | 455.57   | not significant |
| 3065 | SNRNP25      | -1.11 | 6.38E-04 | 1.58E-03 | 1659.87  | not significant |
| 3066 | CSRNP2BP     | -1.11 | 2.91E-03 | 6.39E-03 | 1086.26  | not significant |
| 3067 | COMTD1       | -1.11 | 1.05E-01 | 1.60E-01 | 245.55   | not significant |
| 3068 | TMEM109      | -1.11 | 9.43E-06 | 3.14E-05 | 5032.36  | not significant |

|      |           |       |          |          |          |                 |
|------|-----------|-------|----------|----------|----------|-----------------|
| 3069 | FLOT1     | -1.11 | 1.13E-03 | 2.69E-03 | 1457.40  | not significant |
| 3070 | SSRP1     | -1.11 | 3.92E-07 | 1.56E-06 | 14450.57 | not significant |
| 3071 | PDCC2L    | -1.11 | 5.94E-02 | 9.66E-02 | 353.41   | not significant |
| 3072 | METTL13   | -1.11 | 8.23E-04 | 2.00E-03 | 2305.26  | not significant |
| 3073 | NBEAL1    | -1.11 | 1.06E-01 | 1.61E-01 | 264.01   | not significant |
| 3074 | TRIM62    | -1.11 | 2.50E-02 | 4.48E-02 | 528.32   | not significant |
| 3075 | ZNF281    | -1.11 | 1.33E-03 | 3.12E-03 | 1351.85  | not significant |
| 3076 | MON1B     | -1.11 | 5.53E-04 | 1.39E-03 | 1641.69  | not significant |
| 3077 | CD82      | -1.11 | 5.32E-05 | 1.59E-04 | 5335.33  | not significant |
| 3078 | CDKL1     | -1.11 | 1.36E-01 | 1.99E-01 | 157.61   | not significant |
| 3079 | HRAS      | -1.11 | 1.42E-02 | 2.70E-02 | 748.19   | not significant |
| 3080 | GIN1      | -1.11 | 2.02E-01 | 2.79E-01 | 34.37    | not significant |
| 3081 | LOC643387 | -1.11 | 9.71E-02 | 1.49E-01 | 10.80    | not significant |
| 3082 | LRWD1     | -1.11 | 8.01E-04 | 1.95E-03 | 1486.40  | not significant |
| 3083 | GSTCD     | -1.11 | 4.10E-03 | 8.74E-03 | 1038.51  | not significant |
| 3084 | OAS2      | -1.11 | 5.46E-06 | 1.87E-05 | 3700.43  | not significant |
| 3085 | POU3F2    | -1.11 | 3.49E-02 | 6.03E-02 | 458.54   | not significant |
| 3086 | TBCK      | -1.11 | 8.14E-03 | 1.63E-02 | 895.93   | not significant |
| 3087 | TXNDC12   | -1.11 | 1.07E-05 | 3.54E-05 | 3578.03  | not significant |
| 3088 | LSG1      | -1.11 | 2.67E-04 | 7.11E-04 | 2504.98  | not significant |
| 3089 | MAP2K1    | -1.11 | 5.38E-04 | 1.35E-03 | 2110.87  | not significant |
| 3090 | WDR83     | -1.11 | 3.20E-02 | 5.59E-02 | 486.44   | not significant |
| 3091 | C14orf119 | -1.11 | 1.31E-03 | 3.06E-03 | 1347.10  | not significant |
| 3092 | ESYT1     | -1.11 | 1.47E-07 | 6.16E-07 | 10218.63 | not significant |
| 3093 | ESD       | -1.11 | 8.59E-05 | 2.49E-04 | 5782.03  | not significant |
| 3094 | SLC25A22  | -1.11 | 1.22E-03 | 2.88E-03 | 1461.04  | not significant |
| 3095 | KLC1      | -1.11 | 3.14E-05 | 9.72E-05 | 3141.08  | not significant |
| 3096 | IFT20     | -1.11 | 1.44E-01 | 2.10E-01 | 147.45   | not significant |
| 3097 | GLRX      | -1.11 | 1.11E-03 | 2.64E-03 | 1483.97  | not significant |
| 3098 | TSKU      | -1.11 | 1.05E-01 | 1.60E-01 | 209.83   | not significant |
| 3099 | MAP2K6    | -1.11 | 2.66E-02 | 4.74E-02 | 539.72   | not significant |
| 3100 | AGFG1     | -1.11 | 4.50E-05 | 1.36E-04 | 3320.69  | not significant |
| 3101 | NCLN      | -1.11 | 6.26E-05 | 1.86E-04 | 3911.90  | not significant |
| 3102 | EDRF1     | -1.11 | 5.45E-03 | 1.13E-02 | 1442.94  | not significant |
| 3103 | APOBEC3C  | -1.11 | 2.46E-04 | 6.59E-04 | 2026.60  | not significant |
| 3104 | MMP14     | -1.11 | 2.05E-01 | 2.83E-01 | 35.73    | not significant |
| 3105 | MSL3P1    | -1.11 | 2.60E-02 | 4.65E-02 | 579.04   | not significant |
| 3106 | TSEN15    | -1.11 | 5.78E-05 | 1.72E-04 | 2541.18  | not significant |
| 3107 | TMEM200A  | -1.11 | 1.46E-01 | 2.11E-01 | 146.29   | not significant |
| 3108 | CHCHD3    | -1.11 | 1.03E-05 | 3.41E-05 | 4965.91  | not significant |
| 3109 | RARRS3    | -1.11 | 4.17E-03 | 8.89E-03 | 1045.77  | not significant |
| 3110 | AOC2      | -1.11 | 2.06E-01 | 2.83E-01 | 33.27    | not significant |
| 3111 | PCF11     | -1.11 | 1.04E-04 | 2.96E-04 | 3366.20  | not significant |
| 3112 | NOC4L     | -1.11 | 2.20E-03 | 4.94E-03 | 1288.69  | not significant |
| 3113 | SLBP      | -1.11 | 1.46E-05 | 4.74E-05 | 7488.27  | not significant |
| 3114 | PIN1      | -1.11 | 2.56E-04 | 6.85E-04 | 2713.49  | not significant |
| 3115 | HCFC1     | -1.11 | 1.19E-03 | 2.81E-03 | 2568.33  | not significant |
| 3116 | DAAM1     | -1.11 | 3.27E-02 | 5.70E-02 | 503.59   | not significant |
| 3117 | COPS7B    | -1.11 | 9.76E-05 | 2.81E-04 | 2844.60  | not significant |
| 3118 | GPR180    | -1.11 | 6.27E-04 | 1.56E-03 | 1724.13  | not significant |
| 3119 | DNM2      | -1.11 | 1.66E-07 | 6.92E-07 | 8172.96  | not significant |
| 3120 | OTUD5     | -1.11 | 2.07E-02 | 3.78E-02 | 611.77   | not significant |
| 3121 | GFM1      | -1.11 | 1.73E-04 | 4.79E-04 | 2354.62  | not significant |
| 3122 | MSH6      | -1.11 | 2.15E-06 | 7.79E-06 | 4618.70  | not significant |
| 3123 | GTF2B     | -1.11 | 1.58E-03 | 3.64E-03 | 1576.10  | not significant |
| 3124 | C16orf91  | -1.11 | 3.86E-02 | 6.60E-02 | 453.93   | not significant |
| 3125 | ANKRD44   | -1.11 | 6.77E-03 | 1.38E-02 | 922.99   | not significant |
| 3126 | PPM1F     | -1.11 | 7.68E-04 | 1.87E-03 | 1869.93  | not significant |
| 3127 | SENCR     | -1.11 | 1.38E-01 | 2.02E-01 | 13.32    | not significant |
| 3128 | NOM1      | -1.11 | 4.93E-04 | 1.25E-03 | 2016.76  | not significant |
| 3129 | ARRB1     | -1.11 | 2.63E-04 | 7.02E-04 | 2474.75  | not significant |
| 3130 | NDUFS8    | -1.11 | 2.40E-04 | 6.46E-04 | 2070.61  | not significant |
| 3131 | FUNDC1    | -1.11 | 2.83E-02 | 5.01E-02 | 586.34   | not significant |
| 3132 | ZMYM1     | -1.11 | 1.14E-02 | 2.22E-02 | 876.01   | not significant |
| 3133 | BTN1A1    | -1.11 | 9.38E-02 | 1.44E-01 | 9.69     | not significant |
| 3134 | PNLDC1    | -1.11 | 1.30E-01 | 1.92E-01 | 12.57    | not significant |
| 3135 | SRP19     | -1.11 | 9.11E-04 | 2.19E-03 | 1622.63  | not significant |
| 3136 | NAPA      | -1.11 | 3.33E-04 | 8.72E-04 | 2618.49  | not significant |
| 3137 | AGAP5     | -1.11 | 2.14E-01 | 2.93E-01 | 49.22    | not significant |
| 3138 | LARP4B    | -1.11 | 1.66E-06 | 6.13E-06 | 5147.05  | not significant |
| 3139 | TLL4      | -1.11 | 5.69E-04 | 1.42E-03 | 1870.91  | not significant |
| 3140 | SNX18     | -1.11 | 6.46E-02 | 1.04E-01 | 384.33   | not significant |
| 3141 | IPPK      | -1.11 | 5.62E-02 | 9.20E-02 | 374.15   | not significant |
| 3142 | FAM53C    | -1.11 | 7.24E-04 | 1.77E-03 | 1700.88  | not significant |
| 3143 | ATP2A2    | -1.11 | 4.06E-07 | 1.61E-06 | 11072.17 | not significant |
| 3144 | BCORL1    | -1.11 | 5.53E-03 | 1.15E-02 | 1245.80  | not significant |
| 3145 | UBC       | -1.11 | 6.97E-05 | 2.05E-04 | 13186.41 | not significant |
| 3146 | LOC339803 | -1.11 | 1.02E-01 | 1.55E-01 | 237.74   | not significant |
| 3147 | WDR36     | -1.11 | 2.97E-05 | 9.22E-05 | 3144.64  | not significant |
| 3148 | DEDD      | -1.11 | 7.26E-04 | 1.78E-03 | 1838.06  | not significant |
| 3149 | GRAP      | -1.11 | 2.08E-03 | 4.69E-03 | 1328.64  | not significant |
| 3150 | EIF4G2    | -1.11 | 1.99E-07 | 8.19E-07 | 51470.27 | not significant |
| 3151 | SMC5      | -1.11 | 3.57E-05 | 1.10E-04 | 4099.00  | not significant |
| 3152 | RPS6KC1   | -1.11 | 2.02E-02 | 3.70E-02 | 618.91   | not significant |
| 3153 | TNIP2     | -1.11 | 1.15E-02 | 2.24E-02 | 1118.84  | not significant |
| 3154 | DPM3      | -1.11 | 7.39E-02 | 1.17E-01 | 330.12   | not significant |
| 3155 | MRRF      | -1.11 | 2.82E-02 | 5.00E-02 | 615.84   | not significant |
| 3156 | FAM210A   | -1.11 | 2.38E-03 | 5.29E-03 | 1265.89  | not significant |

|      |              |       |          |          |          |                 |
|------|--------------|-------|----------|----------|----------|-----------------|
| 3157 | PIGW         | -1.11 | 1.72E-01 | 2.44E-01 | 18.74    | not significant |
| 3158 | PTCD3        | -1.11 | 2.48E-04 | 6.65E-04 | 5088.48  | not significant |
| 3159 | LOC285484    | -1.11 | 1.49E-01 | 2.15E-01 | 14.98    | not significant |
| 3160 | WRNIP1       | -1.11 | 2.03E-04 | 5.54E-04 | 3472.39  | not significant |
| 3161 | UBA3         | -1.11 | 1.60E-03 | 3.68E-03 | 1548.14  | not significant |
| 3162 | IPO4         | -1.11 | 4.38E-04 | 1.12E-03 | 2168.27  | not significant |
| 3163 | ILKAP        | -1.11 | 2.21E-03 | 4.95E-03 | 1361.58  | not significant |
| 3164 | C2orf76      | -1.11 | 1.09E-01 | 1.64E-01 | 243.87   | not significant |
| 3165 | ACAA2        | -1.11 | 4.51E-05 | 1.37E-04 | 3355.57  | not significant |
| 3166 | USO1         | -1.11 | 1.75E-04 | 4.82E-04 | 3180.78  | not significant |
| 3167 | ATRAID       | -1.11 | 7.24E-04 | 1.77E-03 | 1945.33  | not significant |
| 3168 | CSTB         | -1.11 | 2.00E-03 | 4.51E-03 | 2070.11  | not significant |
| 3169 | C17orf51     | -1.11 | 1.94E-01 | 2.69E-01 | 22.43    | not significant |
| 3170 | MTX2         | -1.11 | 7.90E-03 | 1.59E-02 | 1066.26  | not significant |
| 3171 | CROCC        | -1.11 | 1.18E-02 | 2.27E-02 | 868.95   | not significant |
| 3172 | ZGLP1        | -1.11 | 2.21E-01 | 3.01E-01 | 43.03    | not significant |
| 3173 | MCPH1        | -1.11 | 1.72E-03 | 3.93E-03 | 1528.41  | not significant |
| 3174 | EXOSC10      | -1.11 | 4.69E-04 | 1.20E-03 | 3461.81  | not significant |
| 3175 | RDH11        | -1.11 | 1.68E-05 | 5.41E-05 | 3983.56  | not significant |
| 3176 | CWC15        | -1.11 | 1.63E-02 | 3.05E-02 | 701.31   | not significant |
| 3177 | COPRS        | -1.11 | 1.22E-02 | 2.34E-02 | 835.73   | not significant |
| 3178 | FAM91A1      | -1.11 | 5.35E-04 | 1.35E-03 | 3104.68  | not significant |
| 3179 | C11orf24     | -1.11 | 1.03E-01 | 1.57E-01 | 241.74   | not significant |
| 3180 | C2orf42      | -1.11 | 7.04E-02 | 1.12E-01 | 362.07   | not significant |
| 3181 | CHPT1        | -1.11 | 9.92E-03 | 1.95E-02 | 881.53   | not significant |
| 3182 | TRMT61B      | -1.11 | 5.14E-02 | 8.51E-02 | 402.40   | not significant |
| 3183 | XPO7         | -1.11 | 4.19E-06 | 1.47E-05 | 4731.19  | not significant |
| 3184 | MCCC2        | -1.11 | 2.63E-03 | 5.82E-03 | 1271.57  | not significant |
| 3185 | PLAGL2       | -1.11 | 7.43E-05 | 2.18E-04 | 4783.89  | not significant |
| 3186 | SRSF7        | -1.11 | 7.56E-08 | 3.27E-07 | 9895.57  | not significant |
| 3187 | SMIM8        | -1.11 | 5.45E-02 | 8.97E-02 | 387.92   | not significant |
| 3188 | BAZ1A        | -1.11 | 1.70E-05 | 5.47E-05 | 5738.36  | not significant |
| 3189 | RRP15        | -1.11 | 4.05E-03 | 8.65E-03 | 1317.89  | not significant |
| 3190 | UBAP1        | -1.11 | 7.96E-04 | 1.93E-03 | 1705.58  | not significant |
| 3191 | UFSP2        | -1.11 | 1.49E-02 | 2.81E-02 | 755.09   | not significant |
| 3192 | URB1         | -1.11 | 4.81E-03 | 1.01E-02 | 2237.52  | not significant |
| 3193 | LOC100506990 | -1.11 | 1.18E-01 | 1.76E-01 | 220.67   | not significant |
| 3194 | NPPA-AS1     | -1.11 | 1.73E-01 | 2.45E-01 | 17.77    | not significant |
| 3195 | TMEM223      | -1.11 | 5.27E-02 | 8.70E-02 | 480.52   | not significant |
| 3196 | TUFM         | -1.11 | 4.60E-05 | 1.39E-04 | 7973.73  | not significant |
| 3197 | ANKRD26      | -1.11 | 4.22E-03 | 8.97E-03 | 1126.08  | not significant |
| 3198 | YWHAZ        | -1.11 | 1.07E-07 | 4.56E-07 | 36086.92 | not significant |
| 3199 | ACAD9        | -1.11 | 7.05E-04 | 1.73E-03 | 1817.25  | not significant |
| 3200 | LOC101927919 | -1.11 | 1.76E-01 | 2.49E-01 | 21.21    | not significant |
| 3201 | LINC00116    | -1.11 | 1.75E-01 | 2.47E-01 | 138.03   | not significant |
| 3202 | SURF1        | -1.11 | 5.32E-02 | 8.78E-02 | 429.27   | not significant |
| 3203 | ST6GALNAC4   | -1.11 | 2.05E-01 | 2.83E-01 | 89.62    | not significant |
| 3204 | PRKAR1B      | -1.11 | 4.12E-04 | 1.06E-03 | 3162.25  | not significant |
| 3205 | BLVRB        | -1.11 | 2.02E-01 | 2.79E-01 | 97.57    | not significant |
| 3206 | C1QL1        | -1.11 | 2.25E-01 | 3.06E-01 | 45.49    | not significant |
| 3207 | ARHGEF7      | -1.11 | 2.12E-04 | 5.75E-04 | 3063.38  | not significant |
| 3208 | ADPRHL1      | -1.11 | 2.22E-01 | 3.02E-01 | 34.09    | not significant |
| 3209 | DRG1         | -1.11 | 1.48E-03 | 3.43E-03 | 2474.62  | not significant |
| 3210 | SAMD4A       | -1.11 | 1.48E-01 | 2.14E-01 | 13.02    | not significant |
| 3211 | C12orf29     | -1.11 | 1.62E-03 | 3.72E-03 | 1444.65  | not significant |
| 3212 | SOCS2-AS1    | -1.11 | 2.17E-01 | 2.96E-01 | 75.86    | not significant |
| 3213 | RPS6KB1      | -1.11 | 1.01E-04 | 2.90E-04 | 4047.48  | not significant |
| 3214 | ECD          | -1.11 | 3.92E-03 | 8.40E-03 | 1255.13  | not significant |
| 3215 | PARK7        | -1.11 | 4.86E-04 | 1.23E-03 | 4482.60  | not significant |
| 3216 | KLHL3        | -1.11 | 2.89E-02 | 5.10E-02 | 628.30   | not significant |
| 3217 | 43723_1041   | -1.11 | 2.03E-05 | 6.45E-05 | 6768.24  | not significant |
| 3218 | GNAS         | -1.11 | 4.20E-07 | 1.67E-06 | 25838.85 | not significant |
| 3219 | NLGN4X       | -1.11 | 1.02E-01 | 1.55E-01 | 272.47   | not significant |
| 3220 | SNX19        | -1.11 | 4.56E-05 | 1.38E-04 | 3256.49  | not significant |
| 3221 | MRGBP        | -1.11 | 3.42E-03 | 7.41E-03 | 1297.94  | not significant |
| 3222 | PFDN1        | -1.11 | 5.68E-04 | 1.42E-03 | 2305.11  | not significant |
| 3223 | NDC80        | -1.11 | 2.39E-04 | 6.42E-04 | 2954.07  | not significant |
| 3224 | NADK         | -1.11 | 1.47E-04 | 4.11E-04 | 2802.01  | not significant |
| 3225 | THAP5        | -1.11 | 1.93E-03 | 4.36E-03 | 1558.05  | not significant |
| 3226 | BCDIN3D      | -1.11 | 1.03E-01 | 1.56E-01 | 270.56   | not significant |
| 3227 | ZDHHC16      | -1.11 | 1.74E-03 | 3.97E-03 | 1670.04  | not significant |
| 3228 | MYL12B       | -1.11 | 2.45E-05 | 7.70E-05 | 8213.46  | not significant |
| 3229 | IRAK3        | -1.10 | 9.79E-02 | 1.50E-01 | 8.46     | not significant |
| 3230 | NET1         | -1.10 | 6.10E-04 | 1.52E-03 | 3180.28  | not significant |
| 3231 | HIST1H2BG    | -1.10 | 1.75E-01 | 2.47E-01 | 16.15    | not significant |
| 3232 | FEZ2         | -1.10 | 2.29E-02 | 4.15E-02 | 663.81   | not significant |
| 3233 | LINC00341    | -1.10 | 1.90E-01 | 2.65E-01 | 116.82   | not significant |
| 3234 | AP5M1        | -1.10 | 2.34E-04 | 6.31E-04 | 2537.02  | not significant |
| 3235 | ARPC4        | -1.10 | 4.06E-04 | 1.05E-03 | 3121.31  | not significant |
| 3236 | NBPF10       | -1.10 | 2.30E-01 | 3.11E-01 | 61.65    | not significant |
| 3237 | ATP2A3       | -1.10 | 6.55E-06 | 2.23E-05 | 17755.17 | not significant |
| 3238 | ZNRD1-AS1    | -1.10 | 1.90E-01 | 2.65E-01 | 20.52    | not significant |
| 3239 | MLLT1        | -1.10 | 9.68E-06 | 3.22E-05 | 5148.26  | not significant |
| 3240 | NCK1-AS1     | -1.10 | 2.10E-01 | 2.88E-01 | 93.13    | not significant |
| 3241 | YIPF5        | -1.10 | 2.79E-03 | 6.14E-03 | 1304.87  | not significant |
| 3242 | PRUNE2       | -1.10 | 2.65E-02 | 4.72E-02 | 866.07   | not significant |
| 3243 | SAMM50       | -1.10 | 1.18E-03 | 2.78E-03 | 1974.39  | not significant |
| 3244 | RAPGEF6      | -1.10 | 1.46E-03 | 3.39E-03 | 1788.17  | not significant |

|      |              |       |          |          |          |                 |
|------|--------------|-------|----------|----------|----------|-----------------|
| 3245 | FLJ38122     | -1.10 | 1.86E-01 | 2.60E-01 | 130.40   | not significant |
| 3246 | GNAI3        | -1.10 | 1.31E-04 | 3.68E-04 | 5259.71  | not significant |
| 3247 | U2SURP       | -1.10 | 4.48E-05 | 1.36E-04 | 8670.72  | not significant |
| 3248 | RBM25        | -1.10 | 1.48E-04 | 4.14E-04 | 6486.03  | not significant |
| 3249 | GMEB2        | -1.10 | 4.66E-03 | 9.84E-03 | 1253.55  | not significant |
| 3250 | TTC26        | -1.10 | 2.54E-02 | 4.54E-02 | 627.48   | not significant |
| 3251 | C9orf172     | -1.10 | 1.88E-01 | 2.63E-01 | 18.33    | not significant |
| 3252 | ALS2CR12     | -1.10 | 1.13E-01 | 1.69E-01 | 9.97     | not significant |
| 3253 | DGKE         | -1.10 | 1.43E-01 | 2.08E-01 | 1933.47  | not significant |
| 3254 | CHMP1A       | -1.10 | 3.47E-04 | 9.04E-04 | 3124.40  | not significant |
| 3255 | BAIAP2-AS1   | -1.10 | 7.30E-02 | 1.16E-01 | 352.27   | not significant |
| 3256 | TPM3P9       | -1.10 | 1.33E-02 | 2.54E-02 | 852.30   | not significant |
| 3257 | PIK3CB       | -1.10 | 1.71E-03 | 3.92E-03 | 1534.36  | not significant |
| 3258 | MIR17HG      | -1.10 | 2.36E-01 | 3.18E-01 | 288.54   | not significant |
| 3259 | TMSB4X       | -1.10 | 2.24E-04 | 6.04E-04 | 40361.32 | not significant |
| 3260 | DTWD2        | -1.10 | 4.39E-02 | 7.40E-02 | 530.31   | not significant |
| 3261 | DNMT1        | -1.10 | 2.76E-04 | 7.32E-04 | 16503.48 | not significant |
| 3262 | TRIM52-AS1   | -1.10 | 5.77E-02 | 9.43E-02 | 461.79   | not significant |
| 3263 | TXN2         | -1.10 | 2.23E-04 | 6.03E-04 | 2695.22  | not significant |
| 3264 | SCYL3        | -1.10 | 5.17E-02 | 8.55E-02 | 475.96   | not significant |
| 3265 | LOC100505549 | -1.10 | 9.65E-02 | 1.48E-01 | 324.76   | not significant |
| 3266 | CPEB4        | -1.10 | 7.66E-02 | 1.21E-01 | 345.53   | not significant |
| 3267 | SLC7A5P1     | -1.10 | 2.40E-01 | 3.22E-01 | 48.14    | not significant |
| 3268 | RAB5A        | -1.10 | 1.58E-03 | 3.65E-03 | 1875.68  | not significant |
| 3269 | NCKIPSD      | -1.10 | 1.08E-02 | 2.10E-02 | 958.69   | not significant |
| 3270 | PCBP1        | -1.10 | 4.85E-06 | 1.68E-05 | 13158.05 | not significant |
| 3271 | ZNF232       | -1.10 | 4.42E-02 | 7.44E-02 | 586.86   | not significant |
| 3272 | ADSL         | -1.10 | 2.65E-04 | 7.06E-04 | 4470.45  | not significant |
| 3273 | PTP4A1       | -1.10 | 1.15E-05 | 3.78E-05 | 7067.64  | not significant |
| 3274 | ELMOD3       | -1.10 | 3.46E-02 | 5.99E-02 | 560.44   | not significant |
| 3275 | MAP3K4       | -1.10 | 2.17E-03 | 4.88E-03 | 1536.22  | not significant |
| 3276 | PEF1         | -1.10 | 9.72E-04 | 2.33E-03 | 2144.64  | not significant |
| 3277 | HLA-G        | -1.10 | 1.08E-01 | 1.63E-01 | 8.85     | not significant |
| 3278 | AAR2         | -1.10 | 5.02E-04 | 1.27E-03 | 2637.61  | not significant |
| 3279 | C10orf91     | -1.10 | 2.04E-01 | 2.81E-01 | 20.62    | not significant |
| 3280 | POC5         | -1.10 | 1.89E-02 | 3.48E-02 | 846.38   | not significant |
| 3281 | C9orf64      | -1.10 | 1.64E-02 | 3.07E-02 | 848.51   | not significant |
| 3282 | LAPTM5       | -1.10 | 4.70E-06 | 1.63E-05 | 13234.32 | not significant |
| 3283 | MAGT1        | -1.10 | 3.49E-02 | 6.03E-02 | 562.27   | not significant |
| 3284 | EPDR1        | -1.10 | 9.62E-03 | 1.89E-02 | 1143.71  | not significant |
| 3285 | CPOX         | -1.10 | 8.42E-03 | 1.68E-02 | 1223.97  | not significant |
| 3286 | NUFIP2       | -1.10 | 3.42E-02 | 5.93E-02 | 7152.85  | not significant |
| 3287 | RPTOR        | -1.10 | 1.08E-05 | 3.56E-05 | 7475.39  | not significant |
| 3288 | SOCS7        | -1.10 | 1.61E-01 | 2.31E-01 | 175.60   | not significant |
| 3289 | KCNQ1OT1     | -1.10 | 2.40E-01 | 3.23E-01 | 36.62    | not significant |
| 3290 | TRPM7        | -1.10 | 1.49E-05 | 4.85E-05 | 5058.59  | not significant |
| 3291 | ANGEL2       | -1.10 | 8.60E-03 | 1.71E-02 | 1201.97  | not significant |
| 3292 | HERPUD1      | -1.10 | 1.25E-03 | 2.93E-03 | 1831.44  | not significant |
| 3293 | URB2         | -1.10 | 7.27E-04 | 1.78E-03 | 2159.05  | not significant |
| 3294 | RP9          | -1.10 | 6.40E-02 | 1.03E-01 | 461.77   | not significant |
| 3295 | PRRT2        | -1.10 | 1.10E-01 | 1.65E-01 | 8.99     | not significant |
| 3296 | VMP1         | -1.10 | 6.41E-04 | 1.59E-03 | 3091.06  | not significant |
| 3297 | ALMS1        | -1.10 | 1.72E-03 | 3.92E-03 | 2522.71  | not significant |
| 3298 | PDXK         | -1.10 | 8.26E-03 | 1.65E-02 | 1068.87  | not significant |
| 3299 | IFIT3        | -1.10 | 3.72E-02 | 6.39E-02 | 597.05   | not significant |
| 3300 | CBX4         | -1.10 | 1.43E-03 | 3.33E-03 | 2476.95  | not significant |
| 3301 | MMADHC       | -1.10 | 6.26E-04 | 1.55E-03 | 2258.09  | not significant |
| 3302 | ACTA2        | -1.10 | 2.42E-01 | 3.25E-01 | 37.59    | not significant |
| 3303 | KXD1         | -1.10 | 2.92E-04 | 7.71E-04 | 2890.74  | not significant |
| 3304 | WIP1         | -1.10 | 1.51E-01 | 2.18E-01 | 202.38   | not significant |
| 3305 | CUL4A        | -1.10 | 3.99E-05 | 1.22E-04 | 4037.75  | not significant |
| 3306 | DIS3         | -1.10 | 1.06E-04 | 3.01E-04 | 3255.20  | not significant |
| 3307 | CRLF3        | -1.10 | 3.18E-04 | 8.35E-04 | 2520.56  | not significant |
| 3308 | GPBP1        | -1.10 | 1.77E-04 | 4.88E-04 | 4828.22  | not significant |
| 3309 | B3GNT9       | -1.10 | 2.33E-01 | 3.15E-01 | 90.15    | not significant |
| 3310 | KLHL12       | -1.10 | 2.52E-03 | 5.59E-03 | 1680.82  | not significant |
| 3311 | SNHG16       | -1.10 | 2.18E-03 | 4.89E-03 | 1695.62  | not significant |
| 3312 | ACY1         | -1.10 | 1.77E-01 | 2.49E-01 | 16.22    | not significant |
| 3313 | COPE         | -1.10 | 7.54E-05 | 2.21E-04 | 4986.75  | not significant |
| 3314 | MYH9         | -1.10 | 1.47E-01 | 2.13E-01 | 20782.64 | not significant |
| 3315 | ZNF438       | -1.10 | 6.43E-02 | 1.04E-01 | 476.54   | not significant |
| 3316 | ANXA5        | -1.10 | 7.23E-05 | 2.12E-04 | 4209.07  | not significant |
| 3317 | TFAP4        | -1.10 | 1.11E-02 | 2.16E-02 | 943.19   | not significant |
| 3318 | MAPK8IP2     | -1.10 | 2.03E-01 | 2.81E-01 | 18.85    | not significant |
| 3319 | DGCR6        | -1.10 | 1.97E-01 | 2.73E-01 | 20.02    | not significant |
| 3320 | NEXN         | -1.10 | 1.17E-03 | 2.77E-03 | 2008.31  | not significant |
| 3321 | GMEB1        | -1.10 | 3.08E-02 | 5.40E-02 | 620.72   | not significant |
| 3322 | KIDINS220    | -1.10 | 1.29E-05 | 4.23E-05 | 4650.31  | not significant |
| 3323 | LINC01260    | -1.10 | 1.45E-02 | 2.74E-02 | 857.33   | not significant |
| 3324 | AQR          | -1.10 | 1.79E-03 | 4.08E-03 | 2355.96  | not significant |
| 3325 | CEP63        | -1.10 | 2.63E-03 | 5.82E-03 | 1712.66  | not significant |
| 3326 | TRMT44       | -1.10 | 8.11E-02 | 1.27E-01 | 382.01   | not significant |
| 3327 | TDP1         | -1.10 | 6.26E-04 | 1.55E-03 | 2848.78  | not significant |
| 3328 | ABR          | -1.10 | 7.36E-04 | 1.80E-03 | 2209.19  | not significant |
| 3329 | ELOVL1       | -1.10 | 1.45E-03 | 3.37E-03 | 1852.68  | not significant |
| 3330 | CYB561A3     | -1.10 | 4.58E-03 | 9.69E-03 | 2448.33  | not significant |
| 3331 | GLO1         | -1.10 | 5.15E-05 | 1.55E-04 | 8536.10  | not significant |
| 3332 | COPB1        | -1.10 | 2.48E-06 | 8.93E-06 | 7150.05  | not significant |

|      |              |       |          |          |          |                 |
|------|--------------|-------|----------|----------|----------|-----------------|
| 3333 | POLR2K       | -1.10 | 4.20E-04 | 1.08E-03 | 2687.23  | not significant |
| 3334 | LRRCC1       | -1.10 | 8.70E-04 | 2.10E-03 | 2202.56  | not significant |
| 3335 | C6orf136     | -1.10 | 1.86E-01 | 2.60E-01 | 164.35   | not significant |
| 3336 | DST          | -1.10 | 1.69E-01 | 2.40E-01 | 13.54    | not significant |
| 3337 | UQCRC2       | -1.10 | 9.48E-05 | 2.73E-04 | 8986.81  | not significant |
| 3338 | UGGT1        | -1.10 | 3.40E-05 | 1.05E-04 | 6129.78  | not significant |
| 3339 | ARL1         | -1.10 | 5.94E-04 | 1.48E-03 | 2197.33  | not significant |
| 3340 | MORF4L1      | -1.10 | 2.74E-05 | 8.55E-05 | 5193.56  | not significant |
| 3341 | COG7         | -1.10 | 4.29E-02 | 7.24E-02 | 666.01   | not significant |
| 3342 | UFSP1        | -1.10 | 1.81E-01 | 2.54E-01 | 14.52    | not significant |
| 3343 | ELP5         | -1.10 | 3.05E-03 | 6.66E-03 | 2637.83  | not significant |
| 3344 | FAM213B      | -1.10 | 1.32E-02 | 2.53E-02 | 1194.85  | not significant |
| 3345 | SMU1         | -1.10 | 2.18E-04 | 5.91E-04 | 3568.74  | not significant |
| 3346 | SLC35B1      | -1.10 | 9.47E-03 | 1.87E-02 | 1074.35  | not significant |
| 3347 | PSMF1        | -1.10 | 3.14E-05 | 9.74E-05 | 6977.45  | not significant |
| 3348 | CDYL         | -1.10 | 1.40E-02 | 2.67E-02 | 909.62   | not significant |
| 3349 | GNG2         | -1.10 | 2.49E-06 | 8.96E-06 | 12329.85 | not significant |
| 3350 | C3orf58      | -1.10 | 5.33E-02 | 8.80E-02 | 504.16   | not significant |
| 3351 | DIP2B        | -1.10 | 6.14E-04 | 1.53E-03 | 3737.15  | not significant |
| 3352 | BTBD3        | -1.10 | 1.91E-02 | 3.52E-02 | 892.31   | not significant |
| 3353 | MRPL54       | -1.10 | 3.07E-02 | 5.39E-02 | 851.02   | not significant |
| 3354 | SHFM1        | -1.10 | 9.40E-03 | 1.86E-02 | 2145.98  | not significant |
| 3355 | SRI          | -1.10 | 7.50E-04 | 1.83E-03 | 2747.48  | not significant |
| 3356 | PPP1R15B     | -1.10 | 8.33E-05 | 2.42E-04 | 4438.34  | not significant |
| 3357 | GUF1         | -1.10 | 8.57E-04 | 2.07E-03 | 2378.64  | not significant |
| 3358 | CUEDC1       | -1.10 | 2.56E-01 | 3.41E-01 | 39.15    | not significant |
| 3359 | CD80         | -1.10 | 2.24E-01 | 3.05E-01 | 22.74    | not significant |
| 3360 | VIMP         | -1.10 | 1.91E-02 | 3.52E-02 | 849.45   | not significant |
| 3361 | 43717_21856  | -1.10 | 2.07E-05 | 6.59E-05 | 55293.88 | not significant |
| 3362 | KIN          | -1.10 | 2.73E-02 | 4.86E-02 | 742.23   | not significant |
| 3363 | CHMP7        | -1.10 | 9.64E-04 | 2.31E-03 | 2928.10  | not significant |
| 3364 | ZKSCAN5      | -1.10 | 8.41E-03 | 1.68E-02 | 1318.20  | not significant |
| 3365 | SLC25A17     | -1.10 | 3.10E-03 | 6.78E-03 | 1539.40  | not significant |
| 3366 | PPP4R1L      | -1.10 | 2.36E-01 | 3.18E-01 | 28.27    | not significant |
| 3367 | RNF126       | -1.10 | 7.92E-04 | 1.93E-03 | 2455.15  | not significant |
| 3368 | ATP5O        | -1.10 | 6.32E-05 | 1.88E-04 | 5019.20  | not significant |
| 3369 | RSG1         | -1.10 | 2.49E-01 | 3.32E-01 | 80.54    | not significant |
| 3370 | DIEXF        | -1.10 | 9.43E-03 | 1.86E-02 | 1158.97  | not significant |
| 3371 | CASP6        | -1.10 | 2.13E-02 | 3.88E-02 | 1158.27  | not significant |
| 3372 | NSL1         | -1.10 | 3.46E-04 | 9.03E-04 | 2848.39  | not significant |
| 3373 | IQCG         | -1.10 | 2.32E-01 | 3.13E-01 | 97.82    | not significant |
| 3374 | LOC100506136 | -1.10 | 1.64E-01 | 2.34E-01 | 11.95    | not significant |
| 3375 | MDM2         | -1.10 | 2.30E-04 | 6.19E-04 | 5360.10  | not significant |
| 3376 | TM9SF2       | -1.10 | 4.44E-05 | 1.35E-04 | 6451.39  | not significant |
| 3377 | METTL6       | -1.10 | 2.79E-02 | 4.95E-02 | 816.18   | not significant |
| 3378 | PEBP1        | -1.10 | 2.30E-04 | 6.20E-04 | 9512.14  | not significant |
| 3379 | YME1L1       | -1.10 | 1.39E-05 | 4.53E-05 | 9789.72  | not significant |
| 3380 | SLC35A2      | -1.10 | 2.61E-01 | 3.47E-01 | 53.94    | not significant |
| 3381 | TTLL5        | -1.10 | 7.17E-03 | 1.45E-02 | 1397.09  | not significant |
| 3382 | SYNGAP1      | -1.10 | 1.37E-01 | 2.01E-01 | 311.68   | not significant |
| 3383 | TSC22D4      | -1.10 | 6.04E-04 | 1.50E-03 | 3216.67  | not significant |
| 3384 | TUSC2        | -1.10 | 1.88E-01 | 2.63E-01 | 162.01   | not significant |
| 3385 | CDK1         | -1.10 | 1.33E-05 | 4.37E-05 | 7183.78  | not significant |
| 3386 | RAPGEFL1     | -1.10 | 2.33E-01 | 3.15E-01 | 103.06   | not significant |
| 3387 | ASTE1        | -1.10 | 6.58E-02 | 1.06E-01 | 464.00   | not significant |
| 3388 | SNF8         | -1.10 | 7.54E-03 | 1.52E-02 | 2136.50  | not significant |
| 3389 | RAP1GDS1     | -1.10 | 2.97E-05 | 9.22E-05 | 4499.59  | not significant |
| 3390 | ICOS         | -1.10 | 1.74E-04 | 4.81E-04 | 5060.01  | not significant |
| 3391 | SLK          | -1.10 | 4.55E-04 | 1.16E-03 | 3821.84  | not significant |
| 3392 | ATOX1        | -1.10 | 6.62E-02 | 1.06E-01 | 537.86   | not significant |
| 3393 | STT3A        | -1.10 | 1.75E-05 | 5.63E-05 | 5598.00  | not significant |
| 3394 | PIK3R3       | -1.10 | 6.44E-03 | 1.32E-02 | 1646.98  | not significant |
| 3395 | FBXO38       | -1.10 | 1.23E-02 | 2.37E-02 | 1339.50  | not significant |
| 3396 | SAPCD2       | -1.10 | 7.40E-03 | 1.49E-02 | 1353.18  | not significant |
| 3397 | PNKD         | -1.10 | 3.25E-02 | 5.67E-02 | 788.69   | not significant |
| 3398 | SNX4         | -1.10 | 2.70E-03 | 5.96E-03 | 1742.30  | not significant |
| 3399 | HEMK1        | -1.10 | 2.27E-02 | 4.11E-02 | 1323.18  | not significant |
| 3400 | MARK3        | -1.10 | 9.39E-04 | 2.26E-03 | 2396.29  | not significant |
| 3401 | SRF          | -1.10 | 1.23E-03 | 2.89E-03 | 3500.29  | not significant |
| 3402 | ZNF330       | -1.10 | 6.14E-03 | 1.26E-02 | 1753.82  | not significant |
| 3403 | SGK1         | -1.10 | 2.64E-01 | 3.49E-01 | 56.44    | not significant |
| 3404 | PDSS2        | -1.10 | 1.56E-01 | 2.24E-01 | 234.57   | not significant |
| 3405 | PAGR1        | -1.10 | 4.88E-03 | 1.03E-02 | 2301.07  | not significant |
| 3406 | TOR1A        | -1.10 | 1.27E-03 | 2.99E-03 | 2489.87  | not significant |
| 3407 | SKA1         | -1.10 | 9.87E-02 | 1.51E-01 | 351.96   | not significant |
| 3408 | DCTN6        | -1.10 | 2.24E-02 | 4.06E-02 | 813.51   | not significant |
| 3409 | ARL11        | -1.10 | 9.25E-02 | 1.43E-01 | 379.55   | not significant |
| 3410 | TIPARP       | -1.10 | 8.37E-02 | 1.31E-01 | 411.88   | not significant |
| 3411 | KRIT1        | -1.10 | 1.46E-03 | 3.39E-03 | 2266.50  | not significant |
| 3412 | LMTK2        | -1.10 | 3.75E-03 | 8.08E-03 | 2005.93  | not significant |
| 3413 | RNF8         | -1.10 | 6.78E-03 | 1.38E-02 | 1421.85  | not significant |
| 3414 | CLTCL1       | -1.10 | 2.59E-01 | 3.44E-01 | 70.16    | not significant |
| 3415 | FLYWCH2      | -1.10 | 3.30E-02 | 5.75E-02 | 815.53   | not significant |
| 3416 | MAD2L1       | -1.10 | 3.06E-04 | 8.05E-04 | 4624.93  | not significant |
| 3417 | RAB35        | -1.10 | 3.57E-04 | 9.29E-04 | 3680.50  | not significant |
| 3418 | ZNF470       | -1.10 | 1.75E-01 | 2.47E-01 | 199.72   | not significant |
| 3419 | EXOSC9       | -1.10 | 4.76E-04 | 1.21E-03 | 2840.53  | not significant |
| 3420 | ARL4A        | -1.10 | 1.50E-01 | 2.17E-01 | 254.27   | not significant |

|      |              |       |          |          |          |                 |
|------|--------------|-------|----------|----------|----------|-----------------|
| 3421 | BCL2L13      | -1.10 | 3.20E-03 | 6.98E-03 | 1798.15  | not significant |
| 3422 | EXOC2        | -1.10 | 5.95E-04 | 1.48E-03 | 2399.15  | not significant |
| 3423 | SLC7A1       | -1.10 | 6.84E-06 | 2.33E-05 | 9320.82  | not significant |
| 3424 | RHOV         | -1.10 | 2.29E-01 | 3.10E-01 | 21.02    | not significant |
| 3425 | LGALSL       | -1.10 | 2.28E-01 | 3.09E-01 | 20.02    | not significant |
| 3426 | ANAPC11      | -1.10 | 1.15E-01 | 1.72E-01 | 1856.09  | not significant |
| 3427 | SHKBP1       | -1.09 | 7.33E-04 | 1.79E-03 | 3087.71  | not significant |
| 3428 | TCEANC       | -1.09 | 2.27E-01 | 3.09E-01 | 119.10   | not significant |
| 3429 | LYRM7        | -1.09 | 2.76E-04 | 7.31E-04 | 3041.06  | not significant |
| 3430 | EME1         | -1.09 | 2.58E-02 | 4.61E-02 | 858.17   | not significant |
| 3431 | ORMDL2       | -1.09 | 3.69E-02 | 6.34E-02 | 678.73   | not significant |
| 3432 | TMEM161B-AS1 | -1.09 | 2.56E-01 | 3.41E-01 | 88.15    | not significant |
| 3433 | HAUS6        | -1.09 | 8.27E-05 | 2.40E-04 | 3873.03  | not significant |
| 3434 | POLR3A       | -1.09 | 1.68E-03 | 3.85E-03 | 2380.40  | not significant |
| 3435 | AATF         | -1.09 | 1.26E-04 | 3.54E-04 | 5121.15  | not significant |
| 3436 | ZNF155       | -1.09 | 1.27E-01 | 1.87E-01 | 288.44   | not significant |
| 3437 | TMEM135      | -1.09 | 9.74E-04 | 2.33E-03 | 2241.76  | not significant |
| 3438 | DGKZ         | -1.09 | 7.72E-05 | 2.25E-04 | 6191.93  | not significant |
| 3439 | C19orf40     | -1.09 | 1.40E-01 | 2.04E-01 | 270.68   | not significant |
| 3440 | CNOT2        | -1.09 | 1.91E-04 | 5.22E-04 | 4549.50  | not significant |
| 3441 | DR1          | -1.09 | 9.31E-06 | 3.10E-05 | 7062.41  | not significant |
| 3442 | DRG2         | -1.09 | 3.11E-03 | 6.78E-03 | 1858.29  | not significant |
| 3443 | ZNF275       | -1.09 | 2.60E-01 | 3.45E-01 | 30.03    | not significant |
| 3444 | DCAKD        | -1.09 | 2.12E-02 | 3.86E-02 | 1136.81  | not significant |
| 3445 | FAM104A      | -1.09 | 1.88E-03 | 4.26E-03 | 3027.37  | not significant |
| 3446 | UBE2I        | -1.09 | 2.31E-05 | 7.30E-05 | 7460.00  | not significant |
| 3447 | C3orf38      | -1.09 | 1.13E-02 | 2.20E-02 | 1176.44  | not significant |
| 3448 | CD200R1      | -1.09 | 1.30E-01 | 1.91E-01 | 341.49   | not significant |
| 3449 | ETAA1        | -1.09 | 1.57E-02 | 2.94E-02 | 1112.80  | not significant |
| 3450 | ACADM        | -1.09 | 1.05E-04 | 3.00E-04 | 4086.32  | not significant |
| 3451 | SNX1         | -1.09 | 1.11E-04 | 3.15E-04 | 4029.45  | not significant |
| 3452 | MED25        | -1.09 | 9.14E-03 | 1.81E-02 | 1367.49  | not significant |
| 3453 | TBRG1        | -1.09 | 5.32E-03 | 1.11E-02 | 1813.19  | not significant |
| 3454 | FUBP1        | -1.09 | 2.31E-04 | 6.23E-04 | 7371.39  | not significant |
| 3455 | KARS         | -1.09 | 2.19E-04 | 5.94E-04 | 9575.60  | not significant |
| 3456 | LOC100506746 | -1.09 | 2.36E-01 | 3.18E-01 | 21.05    | not significant |
| 3457 | MTMR2        | -1.09 | 6.45E-04 | 1.60E-03 | 2693.15  | not significant |
| 3458 | ORC4         | -1.09 | 1.10E-02 | 2.15E-02 | 1217.96  | not significant |
| 3459 | ADAT2        | -1.09 | 4.23E-02 | 7.16E-02 | 785.68   | not significant |
| 3460 | RAB3GAP1     | -1.09 | 4.07E-03 | 8.69E-03 | 1677.18  | not significant |
| 3461 | EDEM2        | -1.09 | 6.39E-03 | 1.31E-02 | 1382.68  | not significant |
| 3462 | SIT1         | -1.09 | 4.82E-02 | 8.05E-02 | 602.99   | not significant |
| 3463 | RETSAT       | -1.09 | 3.83E-02 | 6.56E-02 | 679.26   | not significant |
| 3464 | TALDO1       | -1.09 | 5.12E-04 | 1.30E-03 | 4655.74  | not significant |
| 3465 | ID1          | -1.09 | 1.94E-01 | 2.70E-01 | 13.99    | not significant |
| 3466 | MIER1        | -1.09 | 1.60E-03 | 3.68E-03 | 2466.55  | not significant |
| 3467 | OMA1         | -1.09 | 2.10E-02 | 3.83E-02 | 904.20   | not significant |
| 3468 | TMEM209      | -1.09 | 8.37E-05 | 2.43E-04 | 4611.80  | not significant |
| 3469 | APC          | -1.09 | 1.00E-02 | 1.97E-02 | 1435.07  | not significant |
| 3470 | UBE2D1       | -1.09 | 2.70E-02 | 4.81E-02 | 836.62   | not significant |
| 3471 | POLR2A       | -1.09 | 1.82E-01 | 2.55E-01 | 11304.51 | not significant |
| 3472 | SLC35B4      | -1.09 | 5.30E-04 | 1.34E-03 | 2903.07  | not significant |
| 3473 | TMEM261      | -1.09 | 6.84E-03 | 1.39E-02 | 1764.17  | not significant |
| 3474 | IRAK4        | -1.09 | 7.39E-04 | 1.81E-03 | 2958.85  | not significant |
| 3475 | ZDHHC5       | -1.09 | 7.82E-05 | 2.28E-04 | 5352.40  | not significant |
| 3476 | DNAJC19      | -1.09 | 2.89E-02 | 5.11E-02 | 865.38   | not significant |
| 3477 | HJURP        | -1.09 | 1.52E-04 | 4.23E-04 | 3843.25  | not significant |
| 3478 | KCTD10       | -1.09 | 3.48E-04 | 9.08E-04 | 3227.34  | not significant |
| 3479 | MED18        | -1.09 | 4.69E-02 | 7.86E-02 | 644.67   | not significant |
| 3480 | MOCS3        | -1.09 | 1.10E-01 | 1.66E-01 | 352.15   | not significant |
| 3481 | FOXP3-AS1    | -1.09 | 2.50E-01 | 3.34E-01 | 24.10    | not significant |
| 3482 | PMS1         | -1.09 | 7.86E-03 | 1.58E-02 | 1590.00  | not significant |
| 3483 | NPFF         | -1.09 | 2.51E-01 | 3.35E-01 | 22.64    | not significant |
| 3484 | MSTO1        | -1.09 | 2.72E-01 | 3.58E-01 | 77.08    | not significant |
| 3485 | FGFR3        | -1.09 | 1.92E-01 | 2.67E-01 | 216.98   | not significant |
| 3486 | ATP6V0A1     | -1.09 | 2.82E-01 | 3.70E-01 | 57.67    | not significant |
| 3487 | TBCE         | -1.09 | 2.81E-02 | 4.97E-02 | 910.92   | not significant |
| 3488 | ILF2         | -1.09 | 1.00E-05 | 3.33E-05 | 17892.16 | not significant |
| 3489 | GPR35        | -1.09 | 2.80E-01 | 3.68E-01 | 38.39    | not significant |
| 3490 | TGFBRAP1     | -1.09 | 2.28E-03 | 5.10E-03 | 2428.23  | not significant |
| 3491 | CDON         | -1.09 | 8.19E-02 | 1.28E-01 | 462.75   | not significant |
| 3492 | BPHL         | -1.09 | 1.44E-01 | 2.10E-01 | 274.01   | not significant |
| 3493 | BBS7         | -1.09 | 3.24E-02 | 5.66E-02 | 849.43   | not significant |
| 3494 | CHCHD2       | -1.09 | 2.02E-04 | 5.50E-04 | 11009.96 | not significant |
| 3495 | RAB23        | -1.09 | 1.11E-01 | 1.67E-01 | 377.37   | not significant |
| 3496 | WDR41        | -1.09 | 3.95E-03 | 8.46E-03 | 1777.42  | not significant |
| 3497 | CCT4         | -1.09 | 1.28E-04 | 3.60E-04 | 11287.49 | not significant |
| 3498 | STK16        | -1.09 | 4.55E-02 | 7.64E-02 | 681.47   | not significant |
| 3499 | XPNPEP1      | -1.09 | 3.39E-04 | 8.87E-04 | 3550.95  | not significant |
| 3500 | TIMM13       | -1.09 | 4.93E-03 | 1.03E-02 | 2492.08  | not significant |
| 3501 | ZNF385C      | -1.09 | 1.57E-01 | 2.25E-01 | 10.68    | not significant |
| 3502 | TGDS         | -1.09 | 2.99E-02 | 5.27E-02 | 997.93   | not significant |
| 3503 | RBX1         | -1.09 | 7.95E-03 | 1.60E-02 | 1929.43  | not significant |
| 3504 | GLCE         | -1.09 | 2.84E-01 | 3.72E-01 | 59.12    | not significant |
| 3505 | TTI2         | -1.09 | 1.83E-02 | 3.38E-02 | 1138.05  | not significant |
| 3506 | BCL10        | -1.09 | 4.75E-02 | 7.94E-02 | 670.59   | not significant |
| 3507 | CRYGS        | -1.09 | 2.82E-01 | 3.70E-01 | 38.75    | not significant |
| 3508 | LRRRC42      | -1.09 | 1.29E-02 | 2.47E-02 | 1252.42  | not significant |



|      |              |       |          |          |          |                 |
|------|--------------|-------|----------|----------|----------|-----------------|
| 3509 | HDAC4        | -1.09 | 8.76E-05 | 2.54E-04 | 6556.50  | not significant |
| 3510 | CNIH4        | -1.09 | 4.61E-02 | 7.73E-02 | 715.72   | not significant |
| 3511 | RPA2         | -1.09 | 1.12E-03 | 2.66E-03 | 4990.90  | not significant |
| 3512 | SSBP3        | -1.09 | 2.86E-05 | 8.92E-05 | 7384.43  | not significant |
| 3513 | COPG1        | -1.09 | 3.79E-04 | 9.82E-04 | 4112.12  | not significant |
| 3514 | EIF1AD       | -1.09 | 6.07E-03 | 1.25E-02 | 1901.47  | not significant |
| 3515 | VAC14        | -1.09 | 6.26E-02 | 1.28E-02 | 1523.67  | not significant |
| 3516 | CA5BP1       | -1.09 | 2.44E-01 | 3.27E-01 | 131.41   | not significant |
| 3517 | TRAF2        | -1.09 | 1.39E-02 | 2.65E-02 | 1142.30  | not significant |
| 3518 | DDX59        | -1.09 | 2.56E-02 | 4.59E-02 | 954.14   | not significant |
| 3519 | HDLBP        | -1.09 | 6.77E-05 | 2.00E-04 | 6521.30  | not significant |
| 3520 | FAM120AOS    | -1.09 | 1.06E-02 | 2.07E-02 | 1265.04  | not significant |
| 3521 | VPS53        | -1.09 | 6.68E-03 | 1.36E-02 | 1564.11  | not significant |
| 3522 | HEBP1        | -1.09 | 1.62E-01 | 2.32E-01 | 10.83    | not significant |
| 3523 | ARFRP1       | -1.09 | 2.39E-02 | 4.31E-02 | 1097.04  | not significant |
| 3524 | SNHG11       | -1.09 | 1.07E-01 | 1.61E-01 | 429.92   | not significant |
| 3525 | NCKAP5L      | -1.09 | 1.15E-02 | 2.23E-02 | 1522.15  | not significant |
| 3526 | PUS10        | -1.09 | 1.09E-01 | 1.64E-01 | 387.05   | not significant |
| 3527 | PIM2         | -1.09 | 2.88E-01 | 3.76E-01 | 43.66    | not significant |
| 3528 | HNRNPUL1     | -1.09 | 4.22E-06 | 1.47E-05 | 23949.85 | not significant |
| 3529 | OXR1         | -1.09 | 1.07E-04 | 3.04E-04 | 6513.68  | not significant |
| 3530 | NDNL2        | -1.09 | 3.95E-02 | 6.73E-02 | 833.00   | not significant |
| 3531 | EXOC5        | -1.09 | 9.64E-05 | 2.78E-04 | 5875.19  | not significant |
| 3532 | SYNJ2        | -1.09 | 8.25E-03 | 2.00E-03 | 3111.33  | not significant |
| 3533 | CD164        | -1.09 | 4.04E-05 | 1.23E-04 | 11983.81 | not significant |
| 3534 | ESRRA        | -1.09 | 3.14E-02 | 5.50E-02 | 900.30   | not significant |
| 3535 | TCEA3        | -1.09 | 2.93E-01 | 3.82E-01 | 52.72    | not significant |
| 3536 | SRSF11       | -1.09 | 2.04E-03 | 4.60E-03 | 7076.67  | not significant |
| 3537 | GLRX3        | -1.09 | 1.40E-03 | 3.26E-03 | 2556.47  | not significant |
| 3538 | ATP2A1       | -1.09 | 1.48E-01 | 2.15E-01 | 297.92   | not significant |
| 3539 | CCDC163P     | -1.09 | 1.70E-01 | 2.42E-01 | 260.97   | not significant |
| 3540 | ARF5         | -1.09 | 9.13E-04 | 2.20E-03 | 3831.67  | not significant |
| 3541 | RMI1         | -1.09 | 3.82E-03 | 8.22E-03 | 1987.37  | not significant |
| 3542 | RBBP6        | -1.09 | 9.23E-04 | 2.22E-03 | 4875.31  | not significant |
| 3543 | TFG          | -1.09 | 1.90E-03 | 4.30E-03 | 2356.57  | not significant |
| 3544 | VPS36        | -1.09 | 7.96E-04 | 1.93E-03 | 3106.56  | not significant |
| 3545 | HIST1H2BO    | -1.09 | 2.71E-01 | 3.57E-01 | 24.26    | not significant |
| 3546 | PRCC         | -1.09 | 7.94E-04 | 1.93E-03 | 3151.18  | not significant |
| 3547 | CYB5B        | -1.09 | 2.26E-04 | 6.09E-04 | 6826.78  | not significant |
| 3548 | DUSP18       | -1.09 | 2.12E-01 | 2.90E-01 | 179.15   | not significant |
| 3549 | CEP76        | -1.09 | 5.23E-02 | 8.64E-02 | 682.37   | not significant |
| 3550 | GATB         | -1.09 | 3.19E-02 | 5.58E-02 | 817.92   | not significant |
| 3551 | TMEM167A     | -1.09 | 6.46E-05 | 1.91E-04 | 4930.38  | not significant |
| 3552 | ATG4C        | -1.09 | 3.34E-02 | 5.81E-02 | 918.27   | not significant |
| 3553 | WDR60        | -1.09 | 5.26E-02 | 8.69E-02 | 666.25   | not significant |
| 3554 | PITX1        | -1.09 | 2.24E-01 | 3.05E-01 | 163.41   | not significant |
| 3555 | POC1B        | -1.09 | 6.95E-03 | 1.41E-02 | 1525.03  | not significant |
| 3556 | GGNBP2       | -1.09 | 4.52E-02 | 7.59E-02 | 799.24   | not significant |
| 3557 | ABI3         | -1.09 | 3.62E-02 | 6.22E-02 | 945.23   | not significant |
| 3558 | FES          | -1.09 | 2.98E-01 | 3.87E-01 | 43.85    | not significant |
| 3559 | WWC3         | -1.09 | 1.37E-02 | 2.61E-02 | 1380.44  | not significant |
| 3560 | STAMBPL1     | -1.09 | 9.81E-03 | 1.93E-02 | 1449.27  | not significant |
| 3561 | MTFR1        | -1.09 | 5.42E-02 | 8.93E-02 | 672.09   | not significant |
| 3562 | INO80        | -1.09 | 4.66E-03 | 9.84E-03 | 1938.95  | not significant |
| 3563 | DHODH        | -1.09 | 8.49E-02 | 1.32E-01 | 473.15   | not significant |
| 3564 | SMAP2        | -1.09 | 7.48E-04 | 1.83E-03 | 3074.72  | not significant |
| 3565 | EMR1         | -1.09 | 2.84E-01 | 3.72E-01 | 28.75    | not significant |
| 3566 | LEO1         | -1.09 | 1.13E-02 | 2.19E-02 | 1526.86  | not significant |
| 3567 | LOC102724297 | -1.09 | 2.16E-01 | 2.96E-01 | 13.84    | not significant |
| 3568 | SLC30A6      | -1.09 | 6.24E-03 | 1.28E-02 | 1828.48  | not significant |
| 3569 | DENND1C      | -1.09 | 7.52E-04 | 1.83E-03 | 3301.76  | not significant |
| 3570 | HSD17B12     | -1.09 | 5.00E-04 | 1.27E-03 | 3212.73  | not significant |
| 3571 | VPS29        | -1.09 | 2.99E-03 | 6.55E-03 | 2190.97  | not significant |
| 3572 | DTNBP1       | -1.09 | 4.53E-02 | 7.61E-02 | 744.92   | not significant |
| 3573 | KMT2D        | -1.09 | 1.39E-01 | 2.03E-01 | 8438.98  | not significant |
| 3574 | PHTF2        | -1.09 | 3.76E-03 | 8.10E-03 | 2135.95  | not significant |
| 3575 | WDR20        | -1.09 | 8.29E-02 | 1.30E-01 | 548.79   | not significant |
| 3576 | HELB         | -1.09 | 1.57E-01 | 2.25E-01 | 290.71   | not significant |
| 3577 | KIAA0586     | -1.09 | 1.43E-02 | 2.71E-02 | 1373.19  | not significant |
| 3578 | KIAA1033     | -1.09 | 1.03E-03 | 2.46E-03 | 2863.05  | not significant |
| 3579 | PSMG3-AS1    | -1.09 | 1.11E-01 | 1.67E-01 | 479.93   | not significant |
| 3580 | MAP3K2       | -1.09 | 1.04E-02 | 2.04E-02 | 2281.83  | not significant |
| 3581 | AGPAT3       | -1.09 | 1.25E-03 | 2.94E-03 | 2753.49  | not significant |
| 3582 | FAN1         | -1.09 | 1.47E-02 | 2.78E-02 | 1313.63  | not significant |
| 3583 | RHBDD1       | -1.09 | 1.16E-02 | 2.25E-02 | 1468.47  | not significant |
| 3584 | MPP7         | -1.09 | 3.02E-01 | 3.92E-01 | 45.44    | not significant |
| 3585 | TOPORS       | -1.09 | 1.21E-02 | 2.33E-02 | 1477.00  | not significant |
| 3586 | NDUFB10      | -1.09 | 4.21E-03 | 8.95E-03 | 2439.46  | not significant |
| 3587 | METTL16      | -1.09 | 5.12E-03 | 1.07E-02 | 2298.85  | not significant |
| 3588 | MIR503HG     | -1.09 | 2.45E-01 | 3.28E-01 | 17.33    | not significant |
| 3589 | LYPLA1       | -1.09 | 1.10E-03 | 2.61E-03 | 3908.08  | not significant |
| 3590 | BLOC1S2      | -1.09 | 2.31E-02 | 4.17E-02 | 1332.69  | not significant |
| 3591 | FKBP7        | -1.09 | 1.97E-01 | 2.74E-01 | 237.73   | not significant |
| 3592 | RPL35        | -1.09 | 7.05E-04 | 1.73E-03 | 13393.70 | not significant |
| 3593 | ZNF146       | -1.09 | 1.58E-03 | 3.63E-03 | 7077.17  | not significant |
| 3594 | WSB2         | -1.09 | 4.18E-03 | 8.90E-03 | 2503.69  | not significant |
| 3595 | SMEK1        | -1.09 | 1.44E-04 | 4.03E-04 | 5726.35  | not significant |
| 3596 | GPR19        | -1.09 | 1.98E-01 | 2.74E-01 | 217.77   | not significant |

|      |              |       |          |          |          |                 |
|------|--------------|-------|----------|----------|----------|-----------------|
| 3597 | UQCRHL       | -1.09 | 1.14E-01 | 1.70E-01 | 417.69   | not significant |
| 3598 | LINS         | -1.09 | 1.45E-01 | 2.11E-01 | 409.25   | not significant |
| 3599 | PPP3R1       | -1.09 | 1.28E-04 | 3.61E-04 | 5584.20  | not significant |
| 3600 | MVD          | -1.09 | 1.14E-02 | 2.20E-02 | 1377.89  | not significant |
| 3601 | CALU         | -1.09 | 3.63E-04 | 9.45E-04 | 5203.13  | not significant |
| 3602 | ZBTB24       | -1.09 | 1.54E-02 | 2.90E-02 | 1369.28  | not significant |
| 3603 | TRAPPC3      | -1.09 | 4.11E-03 | 8.77E-03 | 2031.82  | not significant |
| 3604 | PPP5C        | -1.09 | 3.96E-03 | 8.48E-03 | 2866.33  | not significant |
| 3605 | USP32        | -1.09 | 5.64E-04 | 1.41E-03 | 3703.11  | not significant |
| 3606 | GFPT1        | -1.09 | 2.60E-03 | 5.76E-03 | 2919.67  | not significant |
| 3607 | ABHD13       | -1.09 | 6.80E-03 | 1.39E-02 | 1636.60  | not significant |
| 3608 | STX17        | -1.09 | 7.30E-03 | 1.48E-02 | 1693.48  | not significant |
| 3609 | RNF26        | -1.09 | 6.85E-03 | 1.39E-02 | 2360.77  | not significant |
| 3610 | SETSIP       | -1.09 | 3.05E-01 | 3.94E-01 | 35.99    | not significant |
| 3611 | TAF6         | -1.09 | 5.81E-04 | 1.45E-03 | 4043.48  | not significant |
| 3612 | TMEM65       | -1.09 | 1.80E-02 | 3.34E-02 | 1493.34  | not significant |
| 3613 | CASP3        | -1.09 | 8.74E-04 | 2.11E-03 | 5084.20  | not significant |
| 3614 | BMPR2        | -1.09 | 5.35E-02 | 8.83E-02 | 719.96   | not significant |
| 3615 | SUMO1P3      | -1.09 | 2.84E-01 | 3.72E-01 | 26.65    | not significant |
| 3616 | ZNF485       | -1.09 | 2.12E-01 | 2.91E-01 | 206.65   | not significant |
| 3617 | GALNT2       | -1.09 | 6.33E-05 | 1.88E-04 | 10985.18 | not significant |
| 3618 | KLHL8        | -1.09 | 1.13E-02 | 2.19E-02 | 1501.02  | not significant |
| 3619 | LOC728485    | -1.09 | 2.14E-01 | 2.93E-01 | 214.84   | not significant |
| 3620 | NID2         | -1.09 | 2.00E-01 | 2.77E-01 | 224.57   | not significant |
| 3621 | PTPN22       | -1.09 | 1.49E-02 | 2.82E-02 | 1366.94  | not significant |
| 3622 | UBE2G1       | -1.09 | 6.46E-04 | 1.60E-03 | 4033.28  | not significant |
| 3623 | KDM4C        | -1.09 | 1.90E-02 | 3.50E-02 | 1321.67  | not significant |
| 3624 | LOC100507002 | -1.09 | 2.72E-01 | 3.58E-01 | 21.49    | not significant |
| 3625 | OSGEP1       | -1.08 | 1.08E-01 | 1.64E-01 | 498.56   | not significant |
| 3626 | ACADSB       | -1.08 | 3.53E-02 | 6.10E-02 | 1085.47  | not significant |
| 3627 | FBXO24       | -1.08 | 2.07E-01 | 2.85E-01 | 12.78    | not significant |
| 3628 | EFCAB11      | -1.08 | 2.09E-01 | 2.87E-01 | 226.01   | not significant |
| 3629 | RAPGEF4      | -1.08 | 2.99E-01 | 3.88E-01 | 32.78    | not significant |
| 3630 | ANKEF1       | -1.08 | 2.28E-01 | 3.09E-01 | 181.03   | not significant |
| 3631 | ARHGAP25     | -1.08 | 2.49E-02 | 4.46E-02 | 1052.04  | not significant |
| 3632 | PTAFR        | -1.08 | 2.02E-01 | 2.79E-01 | 11.24    | not significant |
| 3633 | HUS1         | -1.08 | 3.96E-02 | 6.74E-02 | 913.47   | not significant |
| 3634 | IRF3         | -1.08 | 8.36E-03 | 1.67E-02 | 1712.46  | not significant |
| 3635 | MYCBP2       | -1.08 | 7.31E-02 | 1.16E-01 | 6824.78  | not significant |
| 3636 | PPP1R21      | -1.08 | 4.91E-02 | 8.17E-02 | 773.76   | not significant |
| 3637 | PRMT7        | -1.08 | 9.11E-03 | 1.80E-02 | 1608.65  | not significant |
| 3638 | MPDU1        | -1.08 | 1.19E-02 | 2.29E-02 | 1416.40  | not significant |
| 3639 | NRADDP       | -1.08 | 1.79E-01 | 2.52E-01 | 9.97     | not significant |
| 3640 | TUBGCP4      | -1.08 | 7.48E-03 | 1.51E-02 | 1830.51  | not significant |
| 3641 | SNAI3-AS1    | -1.08 | 3.08E-01 | 3.97E-01 | 35.04    | not significant |
| 3642 | SS18L2       | -1.08 | 5.68E-02 | 9.28E-02 | 853.36   | not significant |
| 3643 | SLC6A19      | -1.08 | 2.79E-01 | 3.67E-01 | 22.63    | not significant |
| 3644 | MSRB2        | -1.08 | 1.53E-01 | 2.20E-01 | 400.80   | not significant |
| 3645 | SIRT4        | -1.08 | 2.42E-01 | 3.25E-01 | 16.20    | not significant |
| 3646 | CSNK1A1      | -1.08 | 2.16E-04 | 5.85E-04 | 7298.74  | not significant |
| 3647 | NGDN         | -1.08 | 1.86E-02 | 3.43E-02 | 1582.67  | not significant |
| 3648 | CRK          | -1.08 | 5.23E-02 | 8.64E-02 | 755.08   | not significant |
| 3649 | NRAS         | -1.08 | 3.20E-05 | 9.90E-05 | 9421.41  | not significant |
| 3650 | DDX5         | -1.08 | 4.41E-04 | 1.13E-03 | 16407.42 | not significant |
| 3651 | TMEM138      | -1.08 | 5.79E-02 | 9.44E-02 | 726.69   | not significant |
| 3652 | ABL2         | -1.08 | 3.46E-02 | 6.00E-02 | 1042.87  | not significant |
| 3653 | PPP2R5B      | -1.08 | 1.72E-01 | 2.44E-01 | 290.29   | not significant |
| 3654 | RPP40        | -1.08 | 1.84E-01 | 2.58E-01 | 258.94   | not significant |
| 3655 | PCDHGA10     | -1.08 | 1.77E-01 | 2.49E-01 | 9.20     | not significant |
| 3656 | FOXP4        | -1.08 | 2.84E-03 | 6.24E-03 | 3121.10  | not significant |
| 3657 | ZNF148       | -1.08 | 5.78E-03 | 1.19E-02 | 2674.34  | not significant |
| 3658 | NEDD1        | -1.08 | 2.78E-04 | 7.37E-04 | 4537.51  | not significant |
| 3659 | NDEL1        | -1.08 | 2.21E-02 | 4.02E-02 | 1265.01  | not significant |
| 3660 | MAP2K4       | -1.08 | 1.54E-02 | 2.89E-02 | 1696.45  | not significant |
| 3661 | VANGL1       | -1.08 | 3.50E-05 | 1.08E-04 | 10893.26 | not significant |
| 3662 | XRCC3        | -1.08 | 3.02E-03 | 6.61E-03 | 2379.27  | not significant |
| 3663 | AARD         | -1.08 | 1.80E-01 | 2.54E-01 | 278.91   | not significant |
| 3664 | HIST1H4C     | -1.08 | 2.85E-01 | 3.73E-01 | 23.08    | not significant |
| 3665 | TXNDC9       | -1.08 | 4.33E-02 | 7.30E-02 | 957.28   | not significant |
| 3666 | LOC100506083 | -1.08 | 3.22E-01 | 4.13E-01 | 48.26    | not significant |
| 3667 | ZDHHC6       | -1.08 | 7.02E-03 | 1.43E-02 | 2615.44  | not significant |
| 3668 | MMS22L       | -1.08 | 1.69E-03 | 3.88E-03 | 3319.81  | not significant |
| 3669 | S100A6       | -1.08 | 2.53E-01 | 3.37E-01 | 16.66    | not significant |
| 3670 | GPR176       | -1.08 | 2.05E-01 | 2.82E-01 | 232.20   | not significant |
| 3671 | DYNLT1       | -1.08 | 1.87E-01 | 2.61E-01 | 309.42   | not significant |
| 3672 | ZNF658       | -1.08 | 3.22E-01 | 4.13E-01 | 48.35    | not significant |
| 3673 | PXK          | -1.08 | 1.30E-03 | 3.05E-03 | 3554.57  | not significant |
| 3674 | B3GNT1       | -1.08 | 1.91E-01 | 2.65E-01 | 270.28   | not significant |
| 3675 | RPL8         | -1.08 | 7.16E-04 | 1.76E-03 | 39864.77 | not significant |
| 3676 | DUS3L        | -1.08 | 6.47E-03 | 1.32E-02 | 1823.18  | not significant |
| 3677 | SNX2         | -1.08 | 3.63E-02 | 6.24E-02 | 1328.02  | not significant |
| 3678 | GSR          | -1.08 | 4.44E-04 | 1.14E-03 | 4669.91  | not significant |
| 3679 | ZNF207       | -1.08 | 2.34E-04 | 6.29E-04 | 9082.52  | not significant |
| 3680 | METTL18      | -1.08 | 9.52E-02 | 1.46E-01 | 521.41   | not significant |
| 3681 | BAZ1B        | -1.08 | 1.51E-03 | 3.49E-03 | 3270.03  | not significant |
| 3682 | SAP18        | -1.08 | 8.40E-04 | 2.04E-03 | 4791.29  | not significant |
| 3683 | SMC2         | -1.08 | 2.72E-04 | 7.24E-04 | 6514.77  | not significant |
| 3684 | MAFF         | -1.08 | 3.13E-01 | 4.03E-01 | 31.34    | not significant |

|      |              |       |          |          |          |                 |
|------|--------------|-------|----------|----------|----------|-----------------|
| 3685 | GHITM        | -1.08 | 9.32E-04 | 2.24E-03 | 6140.25  | not significant |
| 3686 | PTGER2       | -1.08 | 1.82E-01 | 2.56E-01 | 293.48   | not significant |
| 3687 | C12orf65     | -1.08 | 3.76E-02 | 6.45E-02 | 1142.76  | not significant |
| 3688 | CILP2        | -1.08 | 1.81E-01 | 2.55E-01 | 10.05    | not significant |
| 3689 | SRGAP2D      | -1.08 | 3.19E-01 | 4.10E-01 | 37.04    | not significant |
| 3690 | CDC40        | -1.08 | 1.31E-02 | 2.52E-02 | 1943.26  | not significant |
| 3691 | P2RX7        | -1.08 | 1.66E-01 | 2.36E-01 | 315.32   | not significant |
| 3692 | UBE2G2       | -1.08 | 1.42E-01 | 2.07E-01 | 396.15   | not significant |
| 3693 | KIAA1522     | -1.08 | 2.69E-01 | 3.55E-01 | 18.02    | not significant |
| 3694 | USP47        | -1.08 | 9.77E-04 | 2.34E-03 | 3870.21  | not significant |
| 3695 | TAF5L        | -1.08 | 5.13E-03 | 1.07E-02 | 2233.67  | not significant |
| 3696 | PAFAH2       | -1.08 | 5.98E-03 | 1.23E-02 | 1951.88  | not significant |
| 3697 | SAMD10       | -1.08 | 1.90E-01 | 2.65E-01 | 301.81   | not significant |
| 3698 | MOB3A        | -1.08 | 1.05E-02 | 2.06E-02 | 2158.89  | not significant |
| 3699 | HMGN1        | -1.08 | 1.13E-03 | 2.69E-03 | 11972.23 | not significant |
| 3700 | C10orf76     | -1.08 | 1.52E-02 | 2.87E-02 | 1453.51  | not significant |
| 3701 | GPALPP1      | -1.08 | 3.49E-02 | 6.03E-02 | 1094.57  | not significant |
| 3702 | DCAF7        | -1.08 | 1.39E-04 | 3.89E-04 | 15099.51 | not significant |
| 3703 | IER5         | -1.08 | 1.20E-02 | 2.32E-02 | 1793.16  | not significant |
| 3704 | OTUB1        | -1.08 | 3.26E-03 | 7.10E-03 | 2910.92  | not significant |
| 3705 | ZCCHC4       | -1.08 | 1.15E-01 | 1.72E-01 | 488.01   | not significant |
| 3706 | KCNK12       | -1.08 | 2.71E-01 | 3.58E-01 | 19.00    | not significant |
| 3707 | FBXL18       | -1.08 | 2.94E-02 | 5.18E-02 | 1071.07  | not significant |
| 3708 | CYFIP2       | -1.08 | 1.37E-04 | 3.84E-04 | 20178.67 | not significant |
| 3709 | ANAPC4       | -1.08 | 2.43E-02 | 4.38E-02 | 1295.12  | not significant |
| 3710 | LIG3         | -1.08 | 4.90E-03 | 1.03E-02 | 2130.03  | not significant |
| 3711 | HDAC1        | -1.08 | 3.82E-05 | 1.17E-04 | 10287.16 | not significant |
| 3712 | DERL2        | -1.08 | 6.27E-02 | 1.01E-01 | 883.24   | not significant |
| 3713 | NR2F6        | -1.08 | 1.51E-01 | 2.18E-01 | 419.87   | not significant |
| 3714 | YRDC         | -1.08 | 3.46E-02 | 5.99E-02 | 1149.86  | not significant |
| 3715 | PRPF40B      | -1.08 | 2.70E-01 | 3.56E-01 | 141.70   | not significant |
| 3716 | CCND2        | -1.08 | 2.33E-01 | 3.15E-01 | 13.19    | not significant |
| 3717 | LOC727896    | -1.08 | 2.69E-01 | 3.55E-01 | 17.76    | not significant |
| 3718 | POU2F1       | -1.08 | 2.57E-02 | 4.60E-02 | 1719.01  | not significant |
| 3719 | LOC100506674 | -1.08 | 1.80E-01 | 2.53E-01 | 9.34     | not significant |
| 3720 | DPYD         | -1.08 | 2.71E-03 | 5.98E-03 | 2621.71  | not significant |
| 3721 | GNPDA2       | -1.08 | 1.48E-01 | 2.14E-01 | 359.60   | not significant |
| 3722 | CDV3         | -1.08 | 6.84E-04 | 1.68E-03 | 10455.38 | not significant |
| 3723 | TXNDC11      | -1.08 | 2.15E-02 | 3.91E-02 | 1390.56  | not significant |
| 3724 | MOB1A        | -1.08 | 1.86E-03 | 4.23E-03 | 4207.91  | not significant |
| 3725 | DNAJC10      | -1.08 | 1.52E-03 | 3.53E-03 | 3133.06  | not significant |
| 3726 | RPN2         | -1.08 | 2.60E-04 | 6.94E-04 | 15841.84 | not significant |
| 3727 | CRKL         | -1.08 | 1.80E-04 | 4.94E-04 | 6461.90  | not significant |
| 3728 | LOC100288842 | -1.08 | 2.75E-01 | 3.61E-01 | 19.75    | not significant |
| 3729 | HEYL         | -1.08 | 3.29E-01 | 4.20E-01 | 42.87    | not significant |
| 3730 | ASB6         | -1.08 | 5.29E-02 | 8.73E-02 | 857.13   | not significant |
| 3731 | TXLNG        | -1.08 | 5.44E-03 | 1.13E-02 | 2141.42  | not significant |
| 3732 | NUDT22       | -1.08 | 6.88E-02 | 1.10E-01 | 712.26   | not significant |
| 3733 | THRAP3       | -1.08 | 2.01E-04 | 5.47E-04 | 11704.11 | not significant |
| 3734 | DLD          | -1.08 | 3.93E-03 | 8.42E-03 | 4476.12  | not significant |
| 3735 | MFSD5        | -1.08 | 5.13E-02 | 8.50E-02 | 819.06   | not significant |
| 3736 | PELP1        | -1.08 | 1.36E-03 | 3.17E-03 | 4150.86  | not significant |
| 3737 | RPL23AP82    | -1.08 | 3.12E-01 | 4.03E-01 | 28.12    | not significant |
| 3738 | GLIPR1L2     | -1.08 | 3.00E-01 | 3.89E-01 | 23.75    | not significant |
| 3739 | HDAC11       | -1.08 | 2.86E-01 | 3.74E-01 | 135.06   | not significant |
| 3740 | VAPA         | -1.08 | 7.12E-04 | 1.75E-03 | 7578.20  | not significant |
| 3741 | RAB2A        | -1.08 | 8.52E-03 | 1.70E-02 | 2520.18  | not significant |
| 3742 | HEATR6       | -1.08 | 7.97E-02 | 1.25E-01 | 679.82   | not significant |
| 3743 | MRPL43       | -1.08 | 1.55E-02 | 2.91E-02 | 1511.04  | not significant |
| 3744 | MDN1         | -1.08 | 2.87E-01 | 3.75E-01 | 4015.03  | not significant |
| 3745 | RNGTT        | -1.08 | 3.09E-03 | 6.75E-03 | 3085.77  | not significant |
| 3746 | PMS2         | -1.08 | 5.19E-02 | 8.58E-02 | 797.17   | not significant |
| 3747 | CHRNA6       | -1.08 | 3.07E-01 | 3.97E-01 | 109.35   | not significant |
| 3748 | CBX6         | -1.08 | 1.77E-02 | 3.28E-02 | 1867.42  | not significant |
| 3749 | TIGD4        | -1.08 | 3.29E-01 | 4.20E-01 | 68.54    | not significant |
| 3750 | FANCM        | -1.08 | 7.36E-02 | 1.17E-01 | 831.57   | not significant |
| 3751 | TFIP11       | -1.08 | 9.43E-03 | 1.86E-02 | 1819.92  | not significant |
| 3752 | H2AFY        | -1.08 | 1.68E-04 | 4.64E-04 | 16510.92 | not significant |
| 3753 | WDR55        | -1.08 | 6.55E-02 | 1.05E-01 | 927.99   | not significant |
| 3754 | PPP1R13B     | -1.08 | 3.29E-01 | 4.20E-01 | 72.61    | not significant |
| 3755 | SSC4D        | -1.08 | 2.89E-01 | 3.77E-01 | 20.55    | not significant |
| 3756 | ZNF774       | -1.08 | 3.35E-01 | 4.27E-01 | 40.30    | not significant |
| 3757 | KIAA2018     | -1.08 | 1.11E-02 | 2.16E-02 | 1976.21  | not significant |
| 3758 | AKAP11       | -1.08 | 2.76E-02 | 4.91E-02 | 1674.38  | not significant |
| 3759 | TSNAXIP1     | -1.08 | 2.86E-01 | 3.74E-01 | 21.30    | not significant |
| 3760 | CDC37        | -1.08 | 1.99E-04 | 5.42E-04 | 6722.07  | not significant |
| 3761 | PPP4R1       | -1.08 | 8.72E-03 | 2.11E-03 | 4169.71  | not significant |
| 3762 | EIF4G3       | -1.08 | 4.35E-03 | 9.23E-03 | 2748.36  | not significant |
| 3763 | CHEK1        | -1.08 | 9.30E-04 | 2.24E-03 | 6445.55  | not significant |
| 3764 | MBP          | -1.08 | 3.20E-01 | 4.11E-01 | 96.21    | not significant |
| 3765 | PPWD1        | -1.08 | 2.04E-02 | 3.73E-02 | 1437.74  | not significant |
| 3766 | TXLNA        | -1.08 | 5.12E-04 | 1.30E-03 | 4889.11  | not significant |
| 3767 | C11orf73     | -1.08 | 3.85E-02 | 6.59E-02 | 1068.25  | not significant |
| 3768 | SV2B         | -1.08 | 2.71E-01 | 3.57E-01 | 18.62    | not significant |
| 3769 | CDC73        | -1.08 | 1.24E-02 | 2.38E-02 | 1801.62  | not significant |
| 3770 | TXNL4B       | -1.08 | 1.68E-02 | 3.13E-02 | 1539.33  | not significant |
| 3771 | NELFB        | -1.08 | 9.93E-03 | 1.95E-02 | 1990.12  | not significant |
| 3772 | MTF2         | -1.08 | 4.20E-04 | 1.08E-03 | 5522.06  | not significant |

|      |              |       |          |          |          |                 |
|------|--------------|-------|----------|----------|----------|-----------------|
| 3773 | MFSD2A       | -1.08 | 2.60E-01 | 3.45E-01 | 168.40   | not significant |
| 3774 | BRD4         | -1.08 | 1.49E-03 | 3.45E-03 | 4795.98  | not significant |
| 3775 | ASPM         | -1.08 | 5.70E-03 | 1.18E-02 | 10466.62 | not significant |
| 3776 | KIFC3        | -1.08 | 2.68E-01 | 3.54E-01 | 18.69    | not significant |
| 3777 | RIOK3        | -1.08 | 8.11E-03 | 1.62E-02 | 1967.36  | not significant |
| 3778 | GABPA        | -1.08 | 1.05E-02 | 2.06E-02 | 2325.95  | not significant |
| 3779 | BABAM1       | -1.08 | 1.69E-02 | 3.15E-02 | 2246.15  | not significant |
| 3780 | CNP          | -1.08 | 1.31E-01 | 1.93E-01 | 453.55   | not significant |
| 3781 | ZSWIM8-AS1   | -1.08 | 3.42E-01 | 4.33E-01 | 56.88    | not significant |
| 3782 | GNPTAB       | -1.08 | 2.45E-04 | 6.56E-04 | 7674.20  | not significant |
| 3783 | LRRC16B      | -1.08 | 2.78E-01 | 3.65E-01 | 194.79   | not significant |
| 3784 | DROSHA       | -1.08 | 8.96E-04 | 2.16E-03 | 3940.99  | not significant |
| 3785 | HIST1H2BI    | -1.08 | 2.74E-01 | 3.61E-01 | 16.03    | not significant |
| 3786 | KTN1-AS1     | -1.08 | 3.43E-01 | 4.34E-01 | 50.49    | not significant |
| 3787 | GPR157       | -1.08 | 3.40E-01 | 4.31E-01 | 71.84    | not significant |
| 3788 | ATP6V1D      | -1.08 | 2.04E-02 | 3.74E-02 | 1787.34  | not significant |
| 3789 | PAXIP1       | -1.08 | 1.59E-03 | 3.67E-03 | 3379.64  | not significant |
| 3790 | CDR2         | -1.08 | 1.04E-02 | 2.04E-02 | 2141.35  | not significant |
| 3791 | PARP4        | -1.08 | 3.65E-03 | 7.88E-03 | 4630.82  | not significant |
| 3792 | LOC100506804 | -1.08 | 2.86E-01 | 3.74E-01 | 18.67    | not significant |
| 3793 | RALGAPA1     | -1.08 | 3.42E-01 | 4.33E-01 | 68.56    | not significant |
| 3794 | CLPTM1       | -1.08 | 3.78E-03 | 8.14E-03 | 3126.85  | not significant |
| 3795 | LRRC58       | -1.08 | 5.77E-04 | 1.44E-03 | 7903.73  | not significant |
| 3796 | XPO4         | -1.08 | 1.58E-02 | 2.97E-02 | 2765.40  | not significant |
| 3797 | VPS72        | -1.08 | 3.97E-02 | 6.76E-02 | 1395.32  | not significant |
| 3798 | DDX46        | -1.08 | 1.14E-03 | 2.71E-03 | 6570.79  | not significant |
| 3799 | MB21D2       | -1.08 | 3.45E-01 | 4.36E-01 | 54.02    | not significant |
| 3800 | SFXN2        | -1.08 | 5.00E-02 | 8.32E-02 | 896.91   | not significant |
| 3801 | PEX26        | -1.08 | 6.03E-03 | 1.24E-02 | 2368.00  | not significant |
| 3802 | LARP1        | -1.08 | 5.51E-04 | 1.38E-03 | 16264.99 | not significant |
| 3803 | TCFL5        | -1.08 | 2.78E-02 | 4.94E-02 | 1180.87  | not significant |
| 3804 | CNOT7        | -1.08 | 5.53E-04 | 1.39E-03 | 8195.28  | not significant |
| 3805 | CD27-AS1     | -1.08 | 1.68E-01 | 2.39E-01 | 361.18   | not significant |
| 3806 | OPA3         | -1.08 | 3.77E-02 | 6.46E-02 | 1075.02  | not significant |
| 3807 | DNAH1        | -1.08 | 1.07E-01 | 1.62E-01 | 788.08   | not significant |
| 3808 | NXT2         | -1.08 | 4.59E-02 | 7.70E-02 | 992.07   | not significant |
| 3809 | SATB2        | -1.08 | 3.46E-01 | 4.38E-01 | 65.77    | not significant |
| 3810 | DNAJB4       | -1.08 | 2.28E-01 | 3.10E-01 | 232.37   | not significant |
| 3811 | PCYOX1       | -1.08 | 1.89E-02 | 3.49E-02 | 1644.55  | not significant |
| 3812 | FAM132A      | -1.08 | 1.74E-01 | 2.46E-01 | 7.82     | not significant |
| 3813 | LAT          | -1.08 | 6.66E-04 | 1.64E-03 | 8885.16  | not significant |
| 3814 | EIF3J-AS1    | -1.08 | 3.28E-01 | 4.19E-01 | 92.59    | not significant |
| 3815 | RALY         | -1.08 | 3.56E-04 | 9.28E-04 | 18913.74 | not significant |
| 3816 | MTHFR        | -1.08 | 4.23E-02 | 7.16E-02 | 1030.71  | not significant |
| 3817 | FAHD2CP      | -1.08 | 3.50E-01 | 4.41E-01 | 61.12    | not significant |
| 3818 | ACP6         | -1.08 | 3.04E-01 | 3.94E-01 | 130.71   | not significant |
| 3819 | PARD3        | -1.08 | 4.69E-03 | 9.90E-03 | 3027.02  | not significant |
| 3820 | NXT1         | -1.08 | 3.50E-02 | 6.04E-02 | 1176.08  | not significant |
| 3821 | L3MBTL2      | -1.08 | 1.46E-02 | 2.76E-02 | 1708.07  | not significant |
| 3822 | BSG          | -1.08 | 3.36E-03 | 7.31E-03 | 8642.71  | not significant |
| 3823 | C14orf80     | -1.08 | 2.53E-01 | 3.37E-01 | 199.12   | not significant |
| 3824 | NR1D1        | -1.08 | 1.87E-01 | 2.61E-01 | 349.20   | not significant |
| 3825 | SMG1         | -1.08 | 6.89E-03 | 1.40E-02 | 7497.76  | not significant |
| 3826 | GTF2H1       | -1.08 | 7.91E-03 | 1.59E-02 | 2116.36  | not significant |
| 3827 | PHB2         | -1.08 | 2.64E-03 | 5.85E-03 | 4883.16  | not significant |
| 3828 | SMG1P3       | -1.08 | 3.42E-01 | 4.34E-01 | 106.64   | not significant |
| 3829 | HSDL2        | -1.08 | 3.06E-02 | 5.38E-02 | 1243.07  | not significant |
| 3830 | PLXNB2       | -1.08 | 2.81E-01 | 3.68E-01 | 17.58    | not significant |
| 3831 | HCG18        | -1.08 | 3.51E-01 | 4.43E-01 | 52.28    | not significant |
| 3832 | SKA3         | -1.08 | 2.29E-03 | 5.11E-03 | 3609.95  | not significant |
| 3833 | YDJC         | -1.08 | 3.25E-02 | 5.67E-02 | 1192.64  | not significant |
| 3834 | SIKE1        | -1.08 | 2.70E-03 | 5.96E-03 | 3511.55  | not significant |
| 3835 | DNAJC15      | -1.08 | 1.49E-01 | 2.16E-01 | 443.61   | not significant |
| 3836 | ZNF613       | -1.08 | 2.13E-01 | 2.92E-01 | 270.05   | not significant |
| 3837 | TANC2        | -1.08 | 1.92E-01 | 2.67E-01 | 310.87   | not significant |
| 3838 | ESCO1        | -1.08 | 1.59E-02 | 2.98E-02 | 1817.80  | not significant |
| 3839 | CDK5RAP1     | -1.08 | 2.62E-02 | 4.68E-02 | 1264.45  | not significant |
| 3840 | BTN2A1       | -1.08 | 2.92E-02 | 5.15E-02 | 1303.68  | not significant |
| 3841 | GEN1         | -1.08 | 2.68E-01 | 3.54E-01 | 2308.57  | not significant |
| 3842 | SF3B3        | -1.08 | 4.41E-03 | 9.36E-03 | 13853.76 | not significant |
| 3843 | OGFOD1       | -1.08 | 7.28E-03 | 1.47E-02 | 2309.08  | not significant |
| 3844 | NCDN         | -1.08 | 3.03E-02 | 5.32E-02 | 1610.95  | not significant |
| 3845 | ROCK1        | -1.08 | 6.55E-04 | 1.62E-03 | 6806.36  | not significant |
| 3846 | SEL1L        | -1.08 | 7.43E-04 | 1.82E-03 | 5007.11  | not significant |
| 3847 | TRIM27       | -1.08 | 9.89E-02 | 1.51E-01 | 643.93   | not significant |
| 3848 | UFM1         | -1.08 | 3.59E-03 | 7.75E-03 | 2886.05  | not significant |
| 3849 | KPNA6        | -1.08 | 7.18E-03 | 1.46E-02 | 2733.86  | not significant |
| 3850 | FIBP         | -1.08 | 8.85E-03 | 1.76E-02 | 3210.16  | not significant |
| 3851 | FKTN         | -1.08 | 9.64E-02 | 1.48E-01 | 648.75   | not significant |
| 3852 | ARMC7        | -1.08 | 6.32E-02 | 1.02E-01 | 912.65   | not significant |
| 3853 | SOAT1        | -1.08 | 3.55E-03 | 7.67E-03 | 3200.48  | not significant |
| 3854 | LITAF        | -1.08 | 6.95E-02 | 1.11E-01 | 803.94   | not significant |
| 3855 | CCT8         | -1.08 | 1.35E-04 | 3.78E-04 | 13125.41 | not significant |
| 3856 | CEP41        | -1.08 | 1.48E-01 | 2.14E-01 | 455.95   | not significant |
| 3857 | SLX4         | -1.08 | 1.27E-01 | 1.87E-01 | 822.32   | not significant |
| 3858 | MAN1A2       | -1.08 | 2.04E-02 | 3.74E-02 | 1488.69  | not significant |
| 3859 | TEX30        | -1.08 | 5.14E-02 | 8.52E-02 | 1022.35  | not significant |
| 3860 | DCTPP1       | -1.08 | 8.52E-03 | 1.70E-02 | 3312.36  | not significant |

|      |            |       |          |          |          |                 |
|------|------------|-------|----------|----------|----------|-----------------|
| 3861 | MPC2       | -1.08 | 6.15E-03 | 1.26E-02 | 3157.15  | not significant |
| 3862 | COG3       | -1.08 | 2.09E-02 | 3.81E-02 | 1453.51  | not significant |
| 3863 | NUP62      | -1.08 | 3.66E-04 | 9.51E-04 | 7691.40  | not significant |
| 3864 | MGA        | -1.08 | 1.67E-02 | 3.13E-02 | 3191.49  | not significant |
| 3865 | INTS6      | -1.08 | 1.91E-02 | 3.52E-02 | 1798.36  | not significant |
| 3866 | FBXL19     | -1.08 | 1.45E-02 | 2.75E-02 | 3403.92  | not significant |
| 3867 | GNB1L      | -1.08 | 7.12E-02 | 1.13E-01 | 793.86   | not significant |
| 3868 | VPS35      | -1.08 | 7.73E-04 | 1.88E-03 | 5313.69  | not significant |
| 3869 | CCR4       | -1.08 | 3.13E-01 | 4.03E-01 | 132.03   | not significant |
| 3870 | LSM5       | -1.08 | 5.70E-03 | 1.18E-02 | 3151.44  | not significant |
| 3871 | STIM2      | -1.08 | 5.24E-02 | 8.65E-02 | 1047.59  | not significant |
| 3872 | MCUR1      | -1.08 | 5.82E-03 | 1.20E-02 | 3122.65  | not significant |
| 3873 | ATXN10     | -1.08 | 8.14E-03 | 1.63E-02 | 6042.27  | not significant |
| 3874 | PEX6       | -1.08 | 9.72E-02 | 1.49E-01 | 699.83   | not significant |
| 3875 | ELK4       | -1.08 | 4.30E-03 | 9.14E-03 | 3374.04  | not significant |
| 3876 | ICA1       | -1.08 | 2.04E-01 | 2.81E-01 | 9.46     | not significant |
| 3877 | DDIAS      | -1.08 | 2.34E-02 | 4.23E-02 | 1588.03  | not significant |
| 3878 | BAZ2A      | -1.08 | 9.79E-04 | 2.34E-03 | 5927.16  | not significant |
| 3879 | LIN7C      | -1.08 | 8.76E-02 | 1.36E-01 | 869.69   | not significant |
| 3880 | MOCS1      | -1.08 | 4.10E-02 | 6.96E-02 | 1161.79  | not significant |
| 3881 | MAN1B1-AS1 | -1.08 | 3.17E-01 | 4.08E-01 | 22.84    | not significant |
| 3882 | STX1A      | -1.08 | 2.38E-01 | 3.20E-01 | 10.63    | not significant |
| 3883 | HNRNPH1    | -1.08 | 1.43E-04 | 3.99E-04 | 29210.87 | not significant |
| 3884 | AP3D1      | -1.07 | 1.47E-03 | 3.41E-03 | 6758.85  | not significant |
| 3885 | CCDC91     | -1.07 | 5.22E-02 | 8.63E-02 | 1228.11  | not significant |
| 3886 | SMC1A      | -1.07 | 2.35E-03 | 5.24E-03 | 4340.59  | not significant |
| 3887 | BAG6       | -1.07 | 2.71E-03 | 5.98E-03 | 4409.94  | not significant |
| 3888 | PFDN2      | -1.07 | 6.38E-02 | 1.03E-01 | 1336.73  | not significant |
| 3889 | SNPH       | -1.07 | 3.13E-01 | 4.04E-01 | 136.42   | not significant |
| 3890 | CHERP      | -1.07 | 1.59E-03 | 3.66E-03 | 5277.26  | not significant |
| 3891 | HIST1H2AG  | -1.07 | 3.65E-01 | 4.57E-01 | 44.90    | not significant |
| 3892 | HIP1       | -1.07 | 2.91E-01 | 3.80E-01 | 16.51    | not significant |
| 3893 | PDLIM5     | -1.07 | 5.24E-02 | 8.66E-02 | 987.82   | not significant |
| 3894 | SCAMP2     | -1.07 | 3.61E-02 | 6.21E-02 | 1409.45  | not significant |
| 3895 | CLASP2     | -1.07 | 7.20E-03 | 1.46E-02 | 2879.85  | not significant |
| 3896 | RSBN1L     | -1.07 | 4.43E-02 | 7.47E-02 | 1305.99  | not significant |
| 3897 | GAS5-AS1   | -1.07 | 3.64E-01 | 4.56E-01 | 37.82    | not significant |
| 3898 | CDK5       | -1.07 | 8.10E-02 | 1.27E-01 | 801.23   | not significant |
| 3899 | TIGD6      | -1.07 | 3.09E-01 | 3.99E-01 | 146.16   | not significant |
| 3900 | ATP1B3     | -1.07 | 2.68E-03 | 5.92E-03 | 4874.94  | not significant |
| 3901 | NOS3       | -1.07 | 3.16E-01 | 4.07E-01 | 146.06   | not significant |
| 3902 | SDCCAG3    | -1.07 | 4.79E-02 | 8.01E-02 | 1213.74  | not significant |
| 3903 | DYRK4      | -1.07 | 1.37E-01 | 2.01E-01 | 529.55   | not significant |
| 3904 | ECH1       | -1.07 | 2.39E-02 | 4.31E-02 | 2837.48  | not significant |
| 3905 | C6orf211   | -1.07 | 3.48E-02 | 6.02E-02 | 1599.87  | not significant |
| 3906 | NHP2L1     | -1.07 | 2.44E-03 | 5.42E-03 | 5201.90  | not significant |
| 3907 | SLC6A8     | -1.07 | 2.38E-01 | 3.20E-01 | 11.05    | not significant |
| 3908 | KIAA0895   | -1.07 | 2.67E-01 | 3.53E-01 | 220.68   | not significant |
| 3909 | NSD1       | -1.07 | 4.09E-03 | 8.73E-03 | 5163.02  | not significant |
| 3910 | GTF3C3     | -1.07 | 5.78E-03 | 1.19E-02 | 2782.48  | not significant |
| 3911 | GOLGA7     | -1.07 | 2.76E-03 | 6.08E-03 | 3527.05  | not significant |
| 3912 | SLC25A42   | -1.07 | 9.21E-02 | 1.42E-01 | 718.78   | not significant |
| 3913 | FUBP3      | -1.07 | 1.67E-02 | 3.12E-02 | 2152.05  | not significant |
| 3914 | PHAX       | -1.07 | 5.58E-02 | 9.16E-02 | 1297.31  | not significant |
| 3915 | MTA2       | -1.07 | 3.61E-04 | 9.37E-04 | 9748.08  | not significant |
| 3916 | CD151      | -1.07 | 2.52E-01 | 3.36E-01 | 247.75   | not significant |
| 3917 | TMEM186    | -1.07 | 1.71E-01 | 2.42E-01 | 417.10   | not significant |
| 3918 | TMED9      | -1.07 | 2.27E-01 | 3.08E-01 | 2589.50  | not significant |
| 3919 | CTSV       | -1.07 | 2.80E-01 | 3.68E-01 | 14.04    | not significant |
| 3920 | EZH2       | -1.07 | 4.42E-04 | 1.13E-03 | 7493.93  | not significant |
| 3921 | LMBRD2     | -1.07 | 7.65E-02 | 1.21E-01 | 805.83   | not significant |
| 3922 | CPS1       | -1.07 | 2.95E-01 | 3.84E-01 | 172.77   | not significant |
| 3923 | NUP98      | -1.07 | 4.96E-04 | 1.26E-03 | 7458.68  | not significant |
| 3924 | TRAT1      | -1.07 | 1.19E-02 | 2.29E-02 | 2435.51  | not significant |
| 3925 | TAOK3      | -1.07 | 8.54E-04 | 2.07E-03 | 5052.41  | not significant |
| 3926 | CAMSAP2    | -1.07 | 3.37E-01 | 4.28E-01 | 23.77    | not significant |
| 3927 | SLC23A1    | -1.07 | 3.50E-01 | 4.41E-01 | 139.43   | not significant |
| 3928 | RANBP2     | -1.07 | 1.79E-03 | 4.07E-03 | 6563.08  | not significant |
| 3929 | NUTM2D     | -1.07 | 3.20E-01 | 4.11E-01 | 19.55    | not significant |
| 3930 | ACOT2      | -1.07 | 2.78E-01 | 3.65E-01 | 214.24   | not significant |
| 3931 | STK39      | -1.07 | 2.07E-03 | 4.67E-03 | 3730.90  | not significant |
| 3932 | TNPO3      | -1.07 | 1.29E-03 | 3.02E-03 | 6752.36  | not significant |
| 3933 | PINK1-AS   | -1.07 | 1.99E-01 | 2.75E-01 | 347.30   | not significant |
| 3934 | IKZF5      | -1.07 | 1.01E-01 | 1.54E-01 | 913.57   | not significant |
| 3935 | IGF1R      | -1.07 | 3.25E-02 | 5.68E-02 | 1520.47  | not significant |
| 3936 | PANO       | -1.07 | 3.69E-01 | 4.61E-01 | 70.62    | not significant |
| 3937 | KCNAB2     | -1.07 | 9.86E-04 | 2.36E-03 | 9973.16  | not significant |
| 3938 | ATRN       | -1.07 | 3.43E-01 | 4.34E-01 | 115.47   | not significant |
| 3939 | SLC33A1    | -1.07 | 6.01E-02 | 9.76E-02 | 999.59   | not significant |
| 3940 | WDR5       | -1.07 | 7.42E-03 | 1.50E-02 | 3132.78  | not significant |
| 3941 | MCM10      | -1.07 | 3.47E-03 | 7.50E-03 | 4417.09  | not significant |
| 3942 | TMCO6      | -1.07 | 1.04E-01 | 1.58E-01 | 697.63   | not significant |
| 3943 | TTC7B      | -1.07 | 3.74E-01 | 4.66E-01 | 64.43    | not significant |
| 3944 | LIF        | -1.07 | 9.51E-02 | 1.46E-01 | 863.58   | not significant |
| 3945 | UBE2O      | -1.07 | 7.05E-03 | 1.43E-02 | 3362.81  | not significant |
| 3946 | RAP1B      | -1.07 | 3.81E-03 | 8.19E-03 | 3765.58  | not significant |
| 3947 | CRYGN      | -1.07 | 3.14E-01 | 4.05E-01 | 17.86    | not significant |
| 3948 | UBIAD1     | -1.07 | 5.45E-02 | 8.97E-02 | 1291.34  | not significant |

|      |              |       |          |          |          |                 |
|------|--------------|-------|----------|----------|----------|-----------------|
| 3949 | AKR7L        | -1.07 | 3.52E-01 | 4.44E-01 | 26.83    | not significant |
| 3950 | PRAM1        | -1.07 | 3.52E-01 | 4.44E-01 | 25.84    | not significant |
| 3951 | HMG20A       | -1.07 | 1.75E-02 | 3.25E-02 | 2012.03  | not significant |
| 3952 | FER          | -1.07 | 2.28E-01 | 3.09E-01 | 290.02   | not significant |
| 3953 | ZBTB7A       | -1.07 | 4.92E-02 | 8.18E-02 | 1554.13  | not significant |
| 3954 | SLTM         | -1.07 | 3.02E-03 | 6.61E-03 | 5059.46  | not significant |
| 3955 | EMC1         | -1.07 | 3.49E-02 | 6.04E-02 | 1914.76  | not significant |
| 3956 | DARS         | -1.07 | 2.72E-03 | 6.00E-03 | 4725.34  | not significant |
| 3957 | LOC101927151 | -1.07 | 1.83E-01 | 2.57E-01 | 465.28   | not significant |
| 3958 | LRRC8C       | -1.07 | 4.15E-02 | 7.03E-02 | 1345.33  | not significant |
| 3959 | HSP90B2P     | -1.07 | 3.74E-01 | 4.66E-01 | 80.78    | not significant |
| 3960 | COPZ1        | -1.07 | 8.62E-03 | 1.71E-02 | 4741.47  | not significant |
| 3961 | STRN3        | -1.07 | 6.66E-02 | 1.07E-01 | 983.62   | not significant |
| 3962 | DCTN5        | -1.07 | 1.91E-03 | 4.34E-03 | 4525.67  | not significant |
| 3963 | NUP153       | -1.07 | 1.59E-03 | 3.67E-03 | 6965.64  | not significant |
| 3964 | TOR1AIP2     | -1.07 | 2.06E-02 | 3.77E-02 | 1841.84  | not significant |
| 3965 | AVP1         | -1.07 | 3.05E-01 | 3.95E-01 | 15.85    | not significant |
| 3966 | ZNF467       | -1.07 | 3.38E-01 | 4.29E-01 | 20.39    | not significant |
| 3967 | MTRF1        | -1.07 | 1.66E-01 | 2.36E-01 | 484.41   | not significant |
| 3968 | CYP2R1       | -1.07 | 3.77E-01 | 4.68E-01 | 75.72    | not significant |
| 3969 | LAMTOR5      | -1.07 | 2.54E-02 | 4.54E-02 | 2141.43  | not significant |
| 3970 | RBCK1        | -1.07 | 2.81E-03 | 6.18E-03 | 4978.53  | not significant |
| 3971 | KLHL7-AS1    | -1.07 | 3.83E-01 | 4.75E-01 | 45.01    | not significant |
| 3972 | AP2B1        | -1.07 | 4.90E-03 | 1.03E-02 | 4568.26  | not significant |
| 3973 | ZWILCH       | -1.07 | 1.91E-02 | 3.52E-02 | 2294.25  | not significant |
| 3974 | SKAP1        | -1.07 | 2.99E-02 | 5.26E-02 | 1588.85  | not significant |
| 3975 | FBXO4        | -1.07 | 2.21E-01 | 3.01E-01 | 314.56   | not significant |
| 3976 | GABRR2       | -1.07 | 3.26E-01 | 4.17E-01 | 18.91    | not significant |
| 3977 | PDS5A        | -1.07 | 1.51E-03 | 3.50E-03 | 12862.70 | not significant |
| 3978 | LOC102723703 | -1.07 | 1.71E-01 | 2.43E-01 | 8.52     | not significant |
| 3979 | CYB5R4       | -1.07 | 6.34E-02 | 1.02E-01 | 998.72   | not significant |
| 3980 | SNRPD1       | -1.07 | 2.53E-02 | 4.53E-02 | 4777.06  | not significant |
| 3981 | GANC         | -1.07 | 1.98E-01 | 2.74E-01 | 368.35   | not significant |
| 3982 | LARP1B       | -1.07 | 6.15E-02 | 9.96E-02 | 1067.21  | not significant |
| 3983 | PTGR2        | -1.07 | 2.09E-01 | 2.87E-01 | 347.86   | not significant |
| 3984 | IKZF3        | -1.07 | 1.10E-01 | 1.66E-01 | 710.13   | not significant |
| 3985 | UBL4A        | -1.07 | 1.85E-01 | 2.58E-01 | 480.87   | not significant |
| 3986 | LOC113230    | -1.07 | 2.22E-01 | 3.02E-01 | 9.21     | not significant |
| 3987 | C1orf122     | -1.07 | 1.06E-01 | 1.61E-01 | 806.43   | not significant |
| 3988 | NAMPT        | -1.07 | 4.65E-02 | 7.79E-02 | 1739.48  | not significant |
| 3989 | SEC14L1      | -1.07 | 4.05E-03 | 8.65E-03 | 3926.94  | not significant |
| 3990 | CDC25A       | -1.07 | 2.48E-03 | 5.52E-03 | 4343.46  | not significant |
| 3991 | OXLD1        | -1.07 | 2.22E-01 | 3.03E-01 | 345.98   | not significant |
| 3992 | RASSF5       | -1.07 | 1.13E-01 | 1.69E-01 | 691.52   | not significant |
| 3993 | LYRM1        | -1.07 | 7.78E-02 | 1.22E-01 | 1012.37  | not significant |
| 3994 | PMVK         | -1.07 | 6.13E-02 | 9.93E-02 | 1424.19  | not significant |
| 3995 | KIF2A        | -1.07 | 1.28E-03 | 3.00E-03 | 6924.06  | not significant |
| 3996 | TMEM161A     | -1.07 | 6.05E-02 | 9.82E-02 | 1052.75  | not significant |
| 3997 | BCL11A       | -1.07 | 1.13E-01 | 1.70E-01 | 759.54   | not significant |
| 3998 | SF3B4        | -1.07 | 1.15E-01 | 1.71E-01 | 757.97   | not significant |
| 3999 | PGAM1P5      | -1.07 | 2.63E-01 | 3.49E-01 | 11.74    | not significant |
| 4000 | NEK9         | -1.07 | 2.86E-03 | 6.28E-03 | 4443.70  | not significant |
| 4001 | TK1          | -1.07 | 3.52E-02 | 6.09E-02 | 1394.55  | not significant |
| 4002 | CEP350       | -1.07 | 4.68E-03 | 9.88E-03 | 4586.61  | not significant |
| 4003 | GCLM         | -1.07 | 6.05E-02 | 9.82E-02 | 1255.93  | not significant |
| 4004 | ACER3        | -1.07 | 3.31E-01 | 4.23E-01 | 150.31   | not significant |
| 4005 | FBXL17       | -1.07 | 5.45E-02 | 8.97E-02 | 1158.14  | not significant |
| 4006 | SEC22B       | -1.07 | 1.80E-01 | 2.53E-01 | 452.30   | not significant |
| 4007 | HNRNPUL2     | -1.07 | 3.83E-03 | 8.23E-03 | 4917.81  | not significant |
| 4008 | OTUD6B-AS1   | -1.07 | 3.33E-02 | 5.80E-02 | 1708.24  | not significant |
| 4009 | SIPA1L1      | -1.07 | 3.24E-02 | 5.66E-02 | 1640.75  | not significant |
| 4010 | HIST1H2BE    | -1.07 | 3.81E-01 | 4.73E-01 | 32.28    | not significant |
| 4011 | MTPAP        | -1.07 | 4.73E-02 | 7.92E-02 | 1299.41  | not significant |
| 4012 | AP1M1        | -1.07 | 8.73E-03 | 1.74E-02 | 4022.19  | not significant |
| 4013 | EID2         | -1.07 | 1.21E-01 | 1.80E-01 | 770.82   | not significant |
| 4014 | AMN1         | -1.07 | 2.06E-01 | 2.83E-01 | 423.99   | not significant |
| 4015 | MAP4K5       | -1.07 | 2.02E-02 | 3.70E-02 | 1879.00  | not significant |
| 4016 | GLYR1        | -1.07 | 5.52E-03 | 1.15E-02 | 3713.51  | not significant |
| 4017 | EIF2AK2      | -1.07 | 8.15E-03 | 1.63E-02 | 2911.74  | not significant |
| 4018 | DBR1         | -1.07 | 6.32E-02 | 1.02E-01 | 1246.30  | not significant |
| 4019 | SEMA4G       | -1.07 | 2.69E-01 | 3.55E-01 | 11.77    | not significant |
| 4020 | NADSYN1      | -1.07 | 3.63E-02 | 6.25E-02 | 1477.98  | not significant |
| 4021 | KCNRG        | -1.07 | 3.83E-01 | 4.75E-01 | 34.16    | not significant |
| 4022 | LOC100128239 | -1.07 | 3.23E-01 | 4.14E-01 | 16.49    | not significant |
| 4023 | IFNGR1       | -1.07 | 1.06E-01 | 1.61E-01 | 750.88   | not significant |
| 4024 | MRPS31       | -1.07 | 5.65E-02 | 9.24E-02 | 1131.02  | not significant |
| 4025 | ADARB2       | -1.07 | 3.72E-01 | 4.64E-01 | 27.90    | not significant |
| 4026 | SF3B5        | -1.07 | 2.27E-02 | 4.11E-02 | 3164.20  | not significant |
| 4027 | CMTM3        | -1.07 | 4.09E-03 | 8.72E-03 | 5300.69  | not significant |
| 4028 | CAD          | -1.07 | 2.87E-01 | 3.75E-01 | 7148.43  | not significant |
| 4029 | ARMC2        | -1.07 | 3.63E-01 | 4.55E-01 | 117.44   | not significant |
| 4030 | NEMF         | -1.07 | 3.42E-02 | 5.94E-02 | 2019.79  | not significant |
| 4031 | SUPT20H      | -1.07 | 9.17E-03 | 1.81E-02 | 2973.81  | not significant |
| 4032 | NAA20        | -1.07 | 2.39E-02 | 4.30E-02 | 2271.12  | not significant |
| 4033 | GCN1L1       | -1.07 | 1.99E-01 | 2.75E-01 | 9018.64  | not significant |
| 4034 | STXBP3       | -1.07 | 3.10E-02 | 5.43E-02 | 1812.74  | not significant |
| 4035 | UBR3         | -1.07 | 3.65E-02 | 6.27E-02 | 1477.16  | not significant |
| 4036 | B3GNT2       | -1.07 | 9.89E-03 | 1.94E-02 | 2899.07  | not significant |

|      |              |       |          |          |          |                 |
|------|--------------|-------|----------|----------|----------|-----------------|
| 4037 | TRRAP        | -1.07 | 2.76E-01 | 3.63E-01 | 7939.17  | not significant |
| 4038 | CFAP44       | -1.07 | 3.00E-01 | 3.89E-01 | 307.38   | not significant |
| 4039 | LCLAT1       | -1.07 | 7.67E-02 | 1.21E-01 | 974.30   | not significant |
| 4040 | AOC3         | -1.07 | 3.79E-01 | 4.71E-01 | 27.43    | not significant |
| 4041 | NUTM2B-AS1   | -1.07 | 2.34E-01 | 3.15E-01 | 378.99   | not significant |
| 4042 | WDR37        | -1.07 | 7.22E-02 | 1.15E-01 | 1071.26  | not significant |
| 4043 | ANKRD11      | -1.07 | 4.04E-03 | 8.64E-03 | 5683.16  | not significant |
| 4044 | SF3B2        | -1.07 | 7.50E-04 | 1.83E-03 | 12060.38 | not significant |
| 4045 | LOC100507634 | -1.07 | 3.62E-01 | 4.54E-01 | 21.62    | not significant |
| 4046 | BANF1        | -1.07 | 2.74E-02 | 4.86E-02 | 3253.07  | not significant |
| 4047 | TMCO3        | -1.07 | 5.21E-02 | 8.62E-02 | 1364.14  | not significant |
| 4048 | MCM4         | -1.07 | 4.03E-04 | 1.04E-03 | 29324.93 | not significant |
| 4049 | RPN1         | -1.07 | 1.76E-03 | 4.03E-03 | 9352.43  | not significant |
| 4050 | GNL3L        | -1.07 | 2.43E-02 | 4.37E-02 | 1809.26  | not significant |
| 4051 | PROZ         | -1.07 | 3.87E-01 | 4.80E-01 | 31.89    | not significant |
| 4052 | SH2B3        | -1.07 | 2.24E-02 | 4.07E-02 | 2481.01  | not significant |
| 4053 | SELP         | -1.07 | 3.74E-01 | 4.66E-01 | 26.98    | not significant |
| 4054 | PCGF5        | -1.07 | 4.51E-03 | 9.56E-03 | 7283.20  | not significant |
| 4055 | CEP164       | -1.07 | 9.28E-02 | 1.43E-01 | 887.45   | not significant |
| 4056 | CYB5R1       | -1.07 | 2.24E-01 | 3.05E-01 | 368.42   | not significant |
| 4057 | PLXND1       | -1.07 | 7.80E-02 | 1.23E-01 | 960.34   | not significant |
| 4058 | MED16        | -1.07 | 2.35E-02 | 4.23E-02 | 2491.42  | not significant |
| 4059 | PLEKHH1      | -1.07 | 2.79E-01 | 3.67E-01 | 11.34    | not significant |
| 4060 | CACNB3       | -1.07 | 7.13E-02 | 1.13E-01 | 988.87   | not significant |
| 4061 | CEP89        | -1.07 | 2.44E-01 | 3.28E-01 | 345.33   | not significant |
| 4062 | FKBP11       | -1.07 | 1.25E-01 | 1.85E-01 | 661.93   | not significant |
| 4063 | NPAS1        | -1.07 | 3.66E-01 | 4.58E-01 | 22.71    | not significant |
| 4064 | FRA10AC1     | -1.07 | 1.34E-01 | 1.97E-01 | 701.22   | not significant |
| 4065 | ANXA7        | -1.07 | 1.41E-02 | 2.68E-02 | 2660.47  | not significant |
| 4066 | TNK2         | -1.07 | 4.01E-02 | 6.82E-02 | 1545.96  | not significant |
| 4067 | ABAT         | -1.07 | 1.19E-01 | 1.77E-01 | 704.59   | not significant |
| 4068 | CACNB4       | -1.07 | 3.66E-01 | 4.57E-01 | 21.70    | not significant |
| 4069 | AFMID        | -1.07 | 2.32E-01 | 3.13E-01 | 346.12   | not significant |
| 4070 | CEP85L       | -1.07 | 3.66E-02 | 6.29E-02 | 2285.03  | not significant |
| 4071 | ARIH2        | -1.07 | 4.59E-03 | 9.72E-03 | 3844.97  | not significant |
| 4072 | ISCA1        | -1.07 | 9.25E-02 | 1.43E-01 | 842.50   | not significant |
| 4073 | LOC101926928 | -1.07 | 2.80E-01 | 3.68E-01 | 12.98    | not significant |
| 4074 | ITSN2        | -1.07 | 1.90E-02 | 3.51E-02 | 2159.84  | not significant |
| 4075 | CBX3         | -1.07 | 7.63E-03 | 1.54E-02 | 16674.87 | not significant |
| 4076 | PLK3         | -1.07 | 2.58E-01 | 3.43E-01 | 310.00   | not significant |
| 4077 | MLH3         | -1.07 | 4.67E-02 | 7.84E-02 | 1497.61  | not significant |
| 4078 | PALB2        | -1.07 | 6.70E-02 | 1.07E-01 | 1182.62  | not significant |
| 4079 | SRD5A1       | -1.07 | 1.72E-01 | 2.44E-01 | 535.73   | not significant |
| 4080 | CENPK        | -1.07 | 5.45E-02 | 8.97E-02 | 1961.91  | not significant |
| 4081 | ARMC8        | -1.07 | 2.45E-02 | 4.41E-02 | 1939.57  | not significant |
| 4082 | COMMDD9      | -1.07 | 5.98E-02 | 9.72E-02 | 1312.93  | not significant |
| 4083 | PPARD        | -1.07 | 1.63E-01 | 2.32E-01 | 577.59   | not significant |
| 4084 | NHLRC2       | -1.07 | 3.55E-01 | 4.47E-01 | 712.23   | not significant |
| 4085 | IRAK1BP1     | -1.07 | 2.36E-01 | 3.18E-01 | 363.62   | not significant |
| 4086 | SLC19A1      | -1.07 | 4.88E-02 | 8.13E-02 | 1519.44  | not significant |
| 4087 | SLC27A3      | -1.07 | 3.10E-01 | 4.01E-01 | 13.15    | not significant |
| 4088 | ARHGEF17     | -1.07 | 4.10E-01 | 5.02E-01 | 45.13    | not significant |
| 4089 | GDPPG1       | -1.07 | 3.93E-01 | 4.85E-01 | 28.98    | not significant |
| 4090 | ILF3-AS1     | -1.07 | 2.35E-01 | 3.17E-01 | 393.68   | not significant |
| 4091 | ANAPC10      | -1.07 | 1.32E-01 | 1.94E-01 | 658.32   | not significant |
| 4092 | LOC401134    | -1.07 | 2.60E-01 | 3.45E-01 | 9.20     | not significant |
| 4093 | SPEG         | -1.07 | 2.61E-01 | 3.46E-01 | 9.81     | not significant |
| 4094 | PHF21A       | -1.07 | 9.01E-02 | 1.39E-01 | 1035.49  | not significant |
| 4095 | HTATSF1P2    | -1.07 | 4.00E-01 | 4.92E-01 | 87.33    | not significant |
| 4096 | FBXO28       | -1.07 | 6.91E-02 | 1.10E-01 | 1226.83  | not significant |
| 4097 | SEC24C       | -1.07 | 3.17E-03 | 6.92E-03 | 5504.23  | not significant |
| 4098 | LINC-PINT    | -1.07 | 3.19E-01 | 4.10E-01 | 14.13    | not significant |
| 4099 | USP34        | -1.07 | 1.00E-02 | 1.96E-02 | 6864.03  | not significant |
| 4100 | LOC102724467 | -1.07 | 2.53E-01 | 3.37E-01 | 9.11     | not significant |
| 4101 | LOC101060498 | -1.07 | 3.80E-01 | 4.72E-01 | 23.69    | not significant |
| 4102 | GRB10        | -1.07 | 4.09E-01 | 5.01E-01 | 71.70    | not significant |
| 4103 | SERTAD3      | -1.07 | 4.09E-01 | 5.01E-01 | 71.78    | not significant |
| 4104 | COPS8        | -1.07 | 2.21E-02 | 4.01E-02 | 2826.53  | not significant |
| 4105 | WAS          | -1.07 | 5.20E-02 | 8.61E-02 | 1298.90  | not significant |
| 4106 | IFNAR2       | -1.07 | 2.09E-02 | 3.82E-02 | 2415.00  | not significant |
| 4107 | HMGB3        | -1.07 | 8.71E-02 | 1.35E-01 | 1023.62  | not significant |
| 4108 | RTN4R        | -1.07 | 2.99E-01 | 3.88E-01 | 258.04   | not significant |
| 4109 | MYT1L        | -1.07 | 2.64E-01 | 3.50E-01 | 356.85   | not significant |
| 4110 | HAVCR2       | -1.07 | 3.96E-01 | 4.88E-01 | 28.94    | not significant |
| 4111 | ATP8B2       | -1.07 | 5.81E-03 | 1.20E-02 | 3889.97  | not significant |
| 4112 | MED31        | -1.07 | 2.86E-01 | 3.74E-01 | 257.87   | not significant |
| 4113 | SOX7         | -1.07 | 3.15E-01 | 4.05E-01 | 12.91    | not significant |
| 4114 | SNAP23       | -1.07 | 3.18E-02 | 5.56E-02 | 1758.54  | not significant |
| 4115 | CSPP1        | -1.07 | 7.02E-02 | 1.12E-01 | 1592.49  | not significant |
| 4116 | TPD52L2      | -1.07 | 1.97E-02 | 3.62E-02 | 2931.02  | not significant |
| 4117 | DCAF4L1      | -1.07 | 3.88E-01 | 4.81E-01 | 24.39    | not significant |
| 4118 | LOC100289092 | -1.07 | 3.91E-01 | 4.83E-01 | 116.84   | not significant |
| 4119 | TRIM25       | -1.07 | 4.08E-03 | 8.72E-03 | 5891.88  | not significant |
| 4120 | LPCAT1       | -1.07 | 1.21E-02 | 2.32E-02 | 7074.85  | not significant |
| 4121 | LINC00977    | -1.07 | 8.01E-02 | 1.26E-01 | 1044.30  | not significant |
| 4122 | ZC3H12A      | -1.07 | 3.16E-01 | 4.07E-01 | 221.27   | not significant |
| 4123 | FUT10        | -1.07 | 2.01E-01 | 2.78E-01 | 476.04   | not significant |
| 4124 | MBNL2        | -1.07 | 1.09E-01 | 1.64E-01 | 1079.11  | not significant |

|      |             |       |          |          |          |                 |
|------|-------------|-------|----------|----------|----------|-----------------|
| 4125 | DRP2        | -1.07 | 3.86E-01 | 4.78E-01 | 127.83   | not significant |
| 4126 | DCAF10      | -1.07 | 3.74E-02 | 6.41E-02 | 1626.60  | not significant |
| 4127 | HIST1H1B    | -1.07 | 4.21E-01 | 5.13E-01 | 54.41    | not significant |
| 4128 | SMIM12      | -1.07 | 7.90E-02 | 1.24E-01 | 1182.89  | not significant |
| 4129 | UFL1        | -1.07 | 2.19E-02 | 3.98E-02 | 2382.62  | not significant |
| 4130 | NSUN5       | -1.07 | 1.57E-01 | 2.25E-01 | 618.21   | not significant |
| 4131 | OGFR        | -1.07 | 2.44E-02 | 4.39E-02 | 2721.81  | not significant |
| 4132 | MFSD12      | -1.07 | 1.22E-01 | 1.82E-01 | 903.67   | not significant |
| 4133 | EPB41       | -1.07 | 4.10E-03 | 8.74E-03 | 8146.08  | not significant |
| 4134 | ZNF117      | -1.07 | 1.51E-01 | 2.17E-01 | 1163.98  | not significant |
| 4135 | PHF20L1     | -1.07 | 4.56E-03 | 9.66E-03 | 5600.12  | not significant |
| 4136 | DDX47       | -1.07 | 1.92E-02 | 3.53E-02 | 2292.23  | not significant |
| 4137 | RPIA        | -1.07 | 3.86E-02 | 6.59E-02 | 3166.38  | not significant |
| 4138 | TYW5        | -1.07 | 2.08E-01 | 2.86E-01 | 466.70   | not significant |
| 4139 | NDUFS4      | -1.07 | 1.37E-01 | 2.01E-01 | 948.44   | not significant |
| 4140 | BCL2L12     | -1.07 | 7.21E-02 | 1.15E-01 | 1277.47  | not significant |
| 4141 | GPR97       | -1.07 | 3.34E-01 | 4.25E-01 | 14.69    | not significant |
| 4142 | XPA         | -1.07 | 1.73E-01 | 2.45E-01 | 663.23   | not significant |
| 4143 | RSRC1       | -1.06 | 7.06E-02 | 1.12E-01 | 1270.52  | not significant |
| 4144 | SNRPF       | -1.06 | 2.38E-01 | 3.20E-01 | 4676.54  | not significant |
| 4145 | MAML3       | -1.06 | 2.39E-01 | 3.22E-01 | 391.92   | not significant |
| 4146 | SUMF1       | -1.06 | 3.52E-01 | 4.44E-01 | 189.45   | not significant |
| 4147 | NIP7        | -1.06 | 2.40E-02 | 4.32E-02 | 2413.33  | not significant |
| 4148 | ELP3        | -1.06 | 3.07E-02 | 5.38E-02 | 2094.39  | not significant |
| 4149 | GCSHP3      | -1.06 | 3.66E-01 | 4.58E-01 | 157.52   | not significant |
| 4150 | ZNF705E     | -1.06 | 2.66E-01 | 3.52E-01 | 9.17     | not significant |
| 4151 | WDR62       | -1.06 | 2.22E-01 | 3.02E-01 | 3420.57  | not significant |
| 4152 | JAKMIP1     | -1.06 | 3.23E-02 | 5.65E-02 | 2875.09  | not significant |
| 4153 | COMT        | -1.06 | 4.32E-02 | 7.30E-02 | 2315.75  | not significant |
| 4154 | GTF2H2      | -1.06 | 4.29E-01 | 5.21E-01 | 56.65    | not significant |
| 4155 | MYO19       | -1.06 | 1.31E-01 | 1.93E-01 | 756.59   | not significant |
| 4156 | SCAF11      | -1.06 | 1.72E-03 | 3.93E-03 | 9804.02  | not significant |
| 4157 | LMAN2       | -1.06 | 1.66E-02 | 3.09E-02 | 5693.04  | not significant |
| 4158 | LRRRC37A2   | -1.06 | 4.28E-01 | 5.20E-01 | 49.31    | not significant |
| 4159 | ARHGAP21    | -1.06 | 3.98E-02 | 6.78E-02 | 2521.53  | not significant |
| 4160 | TXNRD1      | -1.06 | 2.64E-03 | 5.83E-03 | 12001.75 | not significant |
| 4161 | MGME1       | -1.06 | 7.50E-02 | 1.19E-01 | 1760.70  | not significant |
| 4162 | LINC01516   | -1.06 | 3.13E-01 | 4.04E-01 | 11.94    | not significant |
| 4163 | SDHAF2      | -1.06 | 6.19E-02 | 1.00E-01 | 1433.00  | not significant |
| 4164 | COTL1       | -1.06 | 1.97E-03 | 4.45E-03 | 8962.67  | not significant |
| 4165 | HRH2        | -1.06 | 2.28E-01 | 3.09E-01 | 8.37     | not significant |
| 4166 | KLRAP1      | -1.06 | 4.11E-01 | 5.03E-01 | 144.42   | not significant |
| 4167 | DIAPH1      | -1.06 | 5.90E-04 | 1.47E-03 | 17699.60 | not significant |
| 4168 | UBXN2A      | -1.06 | 8.61E-02 | 1.34E-01 | 1151.10  | not significant |
| 4169 | COMMMD2     | -1.06 | 4.56E-02 | 7.66E-02 | 1615.58  | not significant |
| 4170 | RGS12       | -1.06 | 4.24E-01 | 5.16E-01 | 35.83    | not significant |
| 4171 | CTDSPL2     | -1.06 | 6.76E-03 | 1.38E-02 | 4246.51  | not significant |
| 4172 | RNF144A-AS1 | -1.06 | 2.22E-01 | 3.02E-01 | 450.85   | not significant |
| 4173 | NDC1        | -1.06 | 5.20E-03 | 1.09E-02 | 4818.35  | not significant |
| 4174 | SENP2       | -1.06 | 4.81E-02 | 8.03E-02 | 2081.50  | not significant |
| 4175 | CCDC127     | -1.06 | 2.05E-01 | 2.83E-01 | 474.90   | not significant |
| 4176 | SHCBP1      | -1.06 | 2.60E-02 | 4.64E-02 | 2944.84  | not significant |
| 4177 | FSTL3       | -1.06 | 3.96E-01 | 4.87E-01 | 127.18   | not significant |
| 4178 | ATIC        | -1.06 | 3.23E-03 | 7.04E-03 | 6463.05  | not significant |
| 4179 | TBC1D5      | -1.06 | 7.48E-03 | 1.51E-02 | 5424.34  | not significant |
| 4180 | CNST        | -1.06 | 3.70E-02 | 6.35E-02 | 1828.35  | not significant |
| 4181 | RBMS2       | -1.06 | 1.98E-01 | 2.75E-01 | 581.78   | not significant |
| 4182 | ABCF3       | -1.06 | 8.49E-02 | 1.32E-01 | 1090.24  | not significant |
| 4183 | SET         | -1.06 | 1.96E-03 | 4.44E-03 | 25694.29 | not significant |
| 4184 | TRMT2A      | -1.06 | 3.34E-02 | 5.81E-02 | 2052.99  | not significant |
| 4185 | SOX12       | -1.06 | 7.65E-02 | 1.21E-01 | 1200.41  | not significant |
| 4186 | MORC2       | -1.06 | 5.59E-02 | 9.16E-02 | 1846.12  | not significant |
| 4187 | LRR1        | -1.06 | 4.58E-02 | 7.68E-02 | 1741.46  | not significant |
| 4188 | HCFC2       | -1.06 | 1.70E-01 | 2.42E-01 | 610.82   | not significant |
| 4189 | HIST1H3I    | -1.06 | 4.11E-01 | 5.03E-01 | 27.70    | not significant |
| 4190 | MAP7D3      | -1.06 | 4.32E-02 | 7.30E-02 | 1840.82  | not significant |
| 4191 | WEE1        | -1.06 | 1.37E-02 | 2.62E-02 | 4139.36  | not significant |
| 4192 | ZZZ3        | -1.06 | 3.84E-02 | 6.57E-02 | 2130.44  | not significant |
| 4193 | AMD1        | -1.06 | 2.05E-03 | 4.63E-03 | 8397.72  | not significant |
| 4194 | ITPRIP      | -1.06 | 1.55E-01 | 2.22E-01 | 695.28   | not significant |
| 4195 | FAM122B     | -1.06 | 1.02E-02 | 2.00E-02 | 5461.97  | not significant |
| 4196 | C3orf62     | -1.06 | 2.65E-01 | 3.50E-01 | 387.68   | not significant |
| 4197 | AGGF1       | -1.06 | 9.82E-03 | 1.93E-02 | 3627.53  | not significant |
| 4198 | BRD2        | -1.06 | 2.14E-02 | 3.89E-02 | 2711.00  | not significant |
| 4199 | LOC654342   | -1.06 | 4.33E-01 | 5.25E-01 | 79.85    | not significant |
| 4200 | FEM1B       | -1.06 | 3.59E-02 | 6.18E-02 | 1878.75  | not significant |
| 4201 | SLC35G1     | -1.06 | 3.81E-01 | 4.73E-01 | 176.05   | not significant |
| 4202 | MRPL27      | -1.06 | 1.43E-01 | 2.08E-01 | 941.09   | not significant |
| 4203 | TMBIM6      | -1.06 | 6.91E-03 | 1.41E-02 | 31265.69 | not significant |
| 4204 | ZSWIM7      | -1.06 | 1.99E-01 | 2.75E-01 | 537.72   | not significant |
| 4205 | QRICH1      | -1.06 | 1.09E-02 | 2.11E-02 | 4210.10  | not significant |
| 4206 | RAD21-AS1   | -1.06 | 3.77E-01 | 4.69E-01 | 19.25    | not significant |
| 4207 | TAB2        | -1.06 | 2.11E-02 | 3.86E-02 | 2785.35  | not significant |
| 4208 | C16orf95    | -1.06 | 4.13E-01 | 5.04E-01 | 112.52   | not significant |
| 4209 | XYLT1       | -1.06 | 3.38E-01 | 4.30E-01 | 13.94    | not significant |
| 4210 | HIST1H2BN   | -1.06 | 4.11E-01 | 5.03E-01 | 25.66    | not significant |
| 4211 | PTGES3L     | -1.06 | 3.17E-01 | 4.08E-01 | 11.26    | not significant |
| 4212 | FUT8        | -1.06 | 2.52E-02 | 4.52E-02 | 2875.89  | not significant |



|      |              |       |          |          |          |                 |
|------|--------------|-------|----------|----------|----------|-----------------|
| 4213 | UBE2Q1       | -1.06 | 2.12E-02 | 3.87E-02 | 2922.48  | not significant |
| 4214 | ALG11        | -1.06 | 3.69E-01 | 4.61E-01 | 173.70   | not significant |
| 4215 | LINC00936    | -1.06 | 3.83E-01 | 4.75E-01 | 19.96    | not significant |
| 4216 | TMEM62       | -1.06 | 4.32E-01 | 5.24E-01 | 82.08    | not significant |
| 4217 | PRR14L       | -1.06 | 4.77E-02 | 7.98E-02 | 2378.72  | not significant |
| 4218 | KLF16        | -1.06 | 8.50E-02 | 1.32E-01 | 1432.77  | not significant |
| 4219 | CANX         | -1.06 | 6.95E-04 | 1.71E-03 | 28315.48 | not significant |
| 4220 | HIST1H2AI    | -1.06 | 3.89E-01 | 4.81E-01 | 19.51    | not significant |
| 4221 | TRADD        | -1.06 | 3.26E-01 | 4.17E-01 | 314.96   | not significant |
| 4222 | DEGS1        | -1.06 | 6.26E-02 | 1.01E-01 | 2183.29  | not significant |
| 4223 | BRAP         | -1.06 | 5.97E-02 | 9.71E-02 | 1818.08  | not significant |
| 4224 | PCCB         | -1.06 | 2.76E-02 | 4.90E-02 | 2524.45  | not significant |
| 4225 | PTMA         | -1.06 | 2.60E-03 | 5.77E-03 | 83042.12 | not significant |
| 4226 | LOC100288637 | -1.06 | 1.41E-01 | 2.06E-01 | 801.26   | not significant |
| 4227 | SMAD6        | -1.06 | 1.47E-01 | 2.13E-01 | 917.35   | not significant |
| 4228 | LAMA2        | -1.06 | 3.35E-01 | 4.27E-01 | 13.85    | not significant |
| 4229 | ILF3         | -1.06 | 1.82E-02 | 3.36E-02 | 26000.53 | not significant |
| 4230 | C9orf69      | -1.06 | 6.40E-02 | 1.03E-01 | 1488.95  | not significant |
| 4231 | CDK6         | -1.06 | 1.33E-02 | 2.55E-02 | 59852.66 | not significant |
| 4232 | PIGG         | -1.06 | 8.06E-02 | 1.26E-01 | 1197.85  | not significant |
| 4233 | AMMECR1L     | -1.06 | 5.53E-02 | 9.08E-02 | 1629.76  | not significant |
| 4234 | NCAPH        | -1.06 | 5.09E-03 | 1.07E-02 | 5465.02  | not significant |
| 4235 | WBSCR16      | -1.06 | 2.77E-01 | 3.64E-01 | 389.28   | not significant |
| 4236 | UBAP2        | -1.06 | 1.33E-02 | 2.55E-02 | 3663.80  | not significant |
| 4237 | POM121       | -1.06 | 1.03E-01 | 1.57E-01 | 1071.35  | not significant |
| 4238 | BRD9         | -1.06 | 3.51E-02 | 6.06E-02 | 2079.53  | not significant |
| 4239 | LBR          | -1.06 | 1.42E-03 | 3.30E-03 | 17991.69 | not significant |
| 4240 | ULBP2        | -1.06 | 4.44E-01 | 5.36E-01 | 86.65    | not significant |
| 4241 | ATP6V1A      | -1.06 | 4.05E-02 | 6.88E-02 | 2075.90  | not significant |
| 4242 | HDHD3        | -1.06 | 3.22E-01 | 4.13E-01 | 267.97   | not significant |
| 4243 | HIST1H4E     | -1.06 | 4.49E-01 | 5.41E-01 | 43.60    | not significant |
| 4244 | SIGMAR1      | -1.06 | 2.56E-02 | 4.59E-02 | 3339.84  | not significant |
| 4245 | HNRNPH3      | -1.06 | 9.50E-03 | 1.87E-02 | 9785.76  | not significant |
| 4246 | INO80D       | -1.06 | 1.90E-01 | 2.65E-01 | 1003.08  | not significant |
| 4247 | CDC6         | -1.06 | 1.51E-02 | 2.84E-02 | 3636.58  | not significant |
| 4248 | AHCYL1       | -1.06 | 2.21E-02 | 4.03E-02 | 4160.85  | not significant |
| 4249 | FAM168B      | -1.06 | 2.37E-02 | 4.27E-02 | 7735.52  | not significant |
| 4250 | LOC341056    | -1.06 | 4.09E-01 | 5.01E-01 | 21.14    | not significant |
| 4251 | AKT2         | -1.06 | 6.63E-03 | 1.35E-02 | 6192.58  | not significant |
| 4252 | STS          | -1.06 | 2.24E-01 | 3.05E-01 | 492.25   | not significant |
| 4253 | FASTKD2      | -1.06 | 1.10E-01 | 1.66E-01 | 1211.72  | not significant |
| 4254 | PSMD9        | -1.06 | 6.08E-02 | 9.86E-02 | 2150.52  | not significant |
| 4255 | REXO1        | -1.06 | 2.58E-02 | 4.61E-02 | 2795.37  | not significant |
| 4256 | LINC01024    | -1.06 | 3.24E-01 | 4.15E-01 | 10.93    | not significant |
| 4257 | NACAP1       | -1.06 | 4.52E-01 | 5.44E-01 | 67.37    | not significant |
| 4258 | DENND3       | -1.06 | 2.15E-01 | 2.95E-01 | 585.09   | not significant |
| 4259 | RNF125       | -1.06 | 3.10E-01 | 4.00E-01 | 313.85   | not significant |
| 4260 | TYW1         | -1.06 | 1.63E-01 | 2.33E-01 | 849.89   | not significant |
| 4261 | RNU6-2       | -1.06 | 3.47E-01 | 4.39E-01 | 14.23    | not significant |
| 4262 | C17orf58     | -1.06 | 4.00E-01 | 4.92E-01 | 21.41    | not significant |
| 4263 | CPB2-AS1     | -1.06 | 4.51E-01 | 5.43E-01 | 40.44    | not significant |
| 4264 | RAB3GAP2     | -1.06 | 2.22E-02 | 4.03E-02 | 2738.62  | not significant |
| 4265 | PPP1R3D      | -1.06 | 4.52E-01 | 5.44E-01 | 68.68    | not significant |
| 4266 | NCAPG2       | -1.06 | 7.38E-03 | 1.49E-02 | 8259.13  | not significant |
| 4267 | PRRC2A       | -1.06 | 1.85E-02 | 3.42E-02 | 7309.14  | not significant |
| 4268 | ARHGAP26     | -1.06 | 7.02E-02 | 1.12E-01 | 1433.76  | not significant |
| 4269 | TMEM251      | -1.06 | 2.25E-01 | 3.06E-01 | 489.56   | not significant |
| 4270 | CREB3        | -1.06 | 1.69E-01 | 2.40E-01 | 893.15   | not significant |
| 4271 | CXorf40B     | -1.06 | 4.28E-01 | 5.20E-01 | 110.92   | not significant |
| 4272 | RALGAPB      | -1.06 | 2.71E-02 | 4.83E-02 | 4811.17  | not significant |
| 4273 | ATMIN        | -1.06 | 3.18E-02 | 5.57E-02 | 2246.51  | not significant |
| 4274 | SEC61G       | -1.06 | 3.41E-01 | 4.32E-01 | 1531.62  | not significant |
| 4275 | PDE6D        | -1.06 | 5.57E-02 | 9.15E-02 | 1743.69  | not significant |
| 4276 | MED7         | -1.06 | 2.76E-01 | 3.63E-01 | 363.15   | not significant |
| 4277 | RAB5C        | -1.06 | 7.50E-02 | 1.19E-01 | 1847.58  | not significant |
| 4278 | PIP4K2C      | -1.06 | 1.19E-01 | 1.77E-01 | 968.90   | not significant |
| 4279 | NEK7         | -1.06 | 1.65E-02 | 3.08E-02 | 4617.04  | not significant |
| 4280 | ZNF584       | -1.06 | 2.92E-01 | 3.80E-01 | 343.66   | not significant |
| 4281 | ZNF839       | -1.06 | 2.65E-01 | 3.51E-01 | 401.86   | not significant |
| 4282 | ADAM8        | -1.06 | 4.57E-01 | 5.49E-01 | 47.03    | not significant |
| 4283 | LOC101928063 | -1.06 | 4.37E-01 | 5.29E-01 | 26.96    | not significant |
| 4284 | NKAP         | -1.06 | 1.63E-01 | 2.33E-01 | 759.71   | not significant |
| 4285 | NAPA-AS1     | -1.06 | 4.55E-01 | 5.46E-01 | 79.79    | not significant |
| 4286 | GNG7         | -1.06 | 2.93E-01 | 3.81E-01 | 9.47     | not significant |
| 4287 | RPP30        | -1.06 | 8.30E-02 | 1.30E-01 | 1629.54  | not significant |
| 4288 | WDR63        | -1.06 | 2.90E-01 | 3.78E-01 | 8.84     | not significant |
| 4289 | PPP1R8       | -1.06 | 2.27E-02 | 4.12E-02 | 3304.64  | not significant |
| 4290 | SRPR         | -1.06 | 7.04E-03 | 1.43E-02 | 6233.02  | not significant |
| 4291 | ZNF267       | -1.06 | 1.42E-01 | 2.07E-01 | 917.16   | not significant |
| 4292 | PIGS         | -1.06 | 7.76E-02 | 1.22E-01 | 1569.22  | not significant |
| 4293 | ZNF79        | -1.06 | 3.43E-01 | 4.34E-01 | 271.68   | not significant |
| 4294 | FBL          | -1.06 | 1.94E-01 | 2.69E-01 | 8352.38  | not significant |
| 4295 | FAM192A      | -1.06 | 1.21E-02 | 2.33E-02 | 4256.30  | not significant |
| 4296 | PCNA         | -1.06 | 1.82E-02 | 3.36E-02 | 27680.27 | not significant |
| 4297 | NAPG         | -1.06 | 6.67E-02 | 1.07E-01 | 1627.36  | not significant |
| 4298 | AFG3L2       | -1.06 | 4.84E-02 | 8.07E-02 | 2760.88  | not significant |
| 4299 | MC1R         | -1.06 | 4.30E-01 | 5.22E-01 | 25.51    | not significant |
| 4300 | TMEM50A      | -1.06 | 1.11E-02 | 2.16E-02 | 4188.46  | not significant |

|      |           |       |          |          |          |                 |
|------|-----------|-------|----------|----------|----------|-----------------|
| 4301 | SLC52A2   | -1.06 | 4.05E-01 | 4.97E-01 | 162.25   | not significant |
| 4302 | PI4KB     | -1.06 | 3.96E-02 | 6.75E-02 | 2648.58  | not significant |
| 4303 | ANGPT1    | -1.06 | 2.51E-01 | 3.35E-01 | 474.06   | not significant |
| 4304 | PLCG2     | -1.06 | 4.59E-01 | 5.50E-01 | 77.25    | not significant |
| 4305 | MAP1LC3B2 | -1.06 | 4.08E-01 | 5.00E-01 | 19.83    | not significant |
| 4306 | CCDC168   | -1.06 | 4.67E-01 | 5.58E-01 | 55.78    | not significant |
| 4307 | TRIM71    | -1.06 | 4.05E-01 | 4.97E-01 | 159.82   | not significant |
| 4308 | RBM45     | -1.06 | 2.66E-01 | 3.52E-01 | 427.62   | not significant |
| 4309 | ATG10     | -1.06 | 2.28E-01 | 3.09E-01 | 519.34   | not significant |
| 4310 | DTD2      | -1.06 | 1.71E-01 | 2.43E-01 | 789.66   | not significant |
| 4311 | CREG1     | -1.06 | 1.23E-01 | 1.82E-01 | 1200.83  | not significant |
| 4312 | FAM220A   | -1.06 | 1.94E-01 | 2.69E-01 | 692.94   | not significant |
| 4313 | EEF2K     | -1.06 | 8.59E-02 | 1.34E-01 | 1671.15  | not significant |
| 4314 | B3GALT6   | -1.06 | 1.53E-01 | 2.20E-01 | 1318.40  | not significant |
| 4315 | MBD1      | -1.06 | 3.02E-02 | 5.31E-02 | 3243.98  | not significant |
| 4316 | SASH3     | -1.06 | 4.60E-03 | 9.73E-03 | 20809.34 | not significant |
| 4317 | SLC16A7   | -1.06 | 7.42E-02 | 1.18E-01 | 1821.31  | not significant |
| 4318 | TLR3      | -1.06 | 3.36E-01 | 4.27E-01 | 305.51   | not significant |
| 4319 | EIF3I     | -1.06 | 2.12E-02 | 3.86E-02 | 8468.54  | not significant |
| 4320 | PCTP      | -1.06 | 2.39E-01 | 3.21E-01 | 497.86   | not significant |
| 4321 | CCDC12    | -1.06 | 1.27E-01 | 1.88E-01 | 1217.19  | not significant |
| 4322 | LMAN2L    | -1.06 | 2.11E-01 | 2.89E-01 | 679.79   | not significant |
| 4323 | NSMCE1    | -1.06 | 8.75E-02 | 1.36E-01 | 1496.95  | not significant |
| 4324 | CCAR2     | -1.06 | 4.06E-03 | 8.67E-03 | 9246.64  | not significant |
| 4325 | AKTIP     | -1.06 | 3.36E-01 | 4.27E-01 | 294.10   | not significant |
| 4326 | RPGR      | -1.06 | 2.65E-01 | 3.51E-01 | 450.99   | not significant |
| 4327 | ANKDD1A   | -1.06 | 4.73E-01 | 5.65E-01 | 55.37    | not significant |
| 4328 | ASRGL1    | -1.06 | 7.82E-02 | 1.23E-01 | 2074.26  | not significant |
| 4329 | HLA-DMA   | -1.06 | 4.67E-01 | 5.58E-01 | 37.69    | not significant |
| 4330 | YTHDF2    | -1.06 | 1.54E-02 | 2.90E-02 | 4100.29  | not significant |
| 4331 | ERMARD    | -1.06 | 3.23E-01 | 4.14E-01 | 388.14   | not significant |
| 4332 | CEBPB     | -1.06 | 3.20E-01 | 4.11E-01 | 450.67   | not significant |
| 4333 | NFATC3    | -1.06 | 1.37E-02 | 2.61E-02 | 7063.21  | not significant |
| 4334 | DNAJC24   | -1.06 | 1.49E-01 | 2.15E-01 | 860.76   | not significant |
| 4335 | C16orf13  | -1.06 | 6.78E-02 | 1.08E-01 | 1673.21  | not significant |
| 4336 | KDM1B     | -1.06 | 1.62E-01 | 2.32E-01 | 878.91   | not significant |
| 4337 | AMH       | -1.06 | 4.43E-01 | 5.35E-01 | 697.62   | not significant |
| 4338 | WAC-AS1   | -1.06 | 2.71E-01 | 3.57E-01 | 420.80   | not significant |
| 4339 | FZR1      | -1.06 | 3.92E-02 | 6.69E-02 | 2639.07  | not significant |
| 4340 | TRIM35    | -1.06 | 7.38E-02 | 1.17E-01 | 2157.41  | not significant |
| 4341 | HAUS2     | -1.06 | 6.15E-02 | 9.96E-02 | 1923.37  | not significant |
| 4342 | DDX52     | -1.06 | 6.61E-02 | 1.06E-01 | 1894.71  | not significant |
| 4343 | MRPL44    | -1.06 | 1.45E-01 | 2.11E-01 | 1055.82  | not significant |
| 4344 | SUPT6H    | -1.06 | 2.37E-02 | 4.28E-02 | 5275.06  | not significant |
| 4345 | UQCRH     | -1.06 | 3.94E-02 | 6.72E-02 | 4317.84  | not significant |
| 4346 | NFYA      | -1.06 | 1.69E-02 | 3.16E-02 | 4801.82  | not significant |
| 4347 | CDK13     | -1.06 | 3.90E-02 | 6.66E-02 | 2972.27  | not significant |
| 4348 | KIF5A     | -1.06 | 4.60E-01 | 5.52E-01 | 31.17    | not significant |
| 4349 | LOC143666 | -1.06 | 4.00E-01 | 4.92E-01 | 17.03    | not significant |
| 4350 | C3AR1     | -1.06 | 3.96E-01 | 4.88E-01 | 16.04    | not significant |
| 4351 | MTMR4     | -1.06 | 1.79E-02 | 3.31E-02 | 4281.61  | not significant |
| 4352 | CCDC25    | -1.06 | 3.98E-02 | 6.77E-02 | 2666.06  | not significant |
| 4353 | ATAD1     | -1.06 | 1.91E-02 | 3.51E-02 | 4041.77  | not significant |
| 4354 | AASDHPPT  | -1.06 | 4.69E-02 | 7.86E-02 | 3078.59  | not significant |
| 4355 | RNMTL1    | -1.06 | 1.87E-01 | 2.61E-01 | 740.85   | not significant |
| 4356 | MACF1     | -1.06 | 5.27E-02 | 8.71E-02 | 10176.53 | not significant |
| 4357 | AGPAT1    | -1.06 | 3.30E-01 | 4.21E-01 | 315.00   | not significant |
| 4358 | CIDECP    | -1.06 | 4.12E-01 | 5.03E-01 | 182.48   | not significant |
| 4359 | NUP205    | -1.06 | 1.69E-02 | 3.14E-02 | 8522.53  | not significant |
| 4360 | FAM45B    | -1.06 | 4.05E-01 | 4.97E-01 | 246.00   | not significant |
| 4361 | RBM17     | -1.06 | 1.28E-02 | 2.46E-02 | 5476.91  | not significant |
| 4362 | DENND6B   | -1.06 | 4.48E-01 | 5.40E-01 | 26.34    | not significant |
| 4363 | CCRN4L    | -1.06 | 3.92E-01 | 4.84E-01 | 212.11   | not significant |
| 4364 | TRMT112   | -1.06 | 5.77E-02 | 9.42E-02 | 2965.23  | not significant |
| 4365 | PIP4K2B   | -1.06 | 1.11E-02 | 2.15E-02 | 5694.07  | not significant |
| 4366 | ATP2B4    | -1.06 | 1.58E-02 | 2.96E-02 | 7449.72  | not significant |
| 4367 | GSTA4     | -1.06 | 4.21E-01 | 5.13E-01 | 161.61   | not significant |
| 4368 | ZNF415    | -1.06 | 2.74E-01 | 3.61E-01 | 450.19   | not significant |
| 4369 | CNOT3     | -1.06 | 1.07E-01 | 1.62E-01 | 1282.20  | not significant |
| 4370 | C2orf69   | -1.06 | 2.12E-01 | 2.91E-01 | 701.37   | not significant |
| 4371 | NUPL1     | -1.06 | 6.97E-03 | 1.42E-02 | 6525.17  | not significant |
| 4372 | AK8       | -1.06 | 3.71E-01 | 4.62E-01 | 12.34    | not significant |
| 4373 | SEC31A    | -1.06 | 7.43E-03 | 1.50E-02 | 6059.44  | not significant |
| 4374 | ZP3       | -1.06 | 4.53E-01 | 5.45E-01 | 27.62    | not significant |
| 4375 | PAF1      | -1.06 | 5.06E-02 | 8.40E-02 | 2192.00  | not significant |
| 4376 | TSSC4     | -1.06 | 1.84E-01 | 2.58E-01 | 860.39   | not significant |
| 4377 | SEC63     | -1.06 | 1.61E-02 | 3.01E-02 | 4819.86  | not significant |
| 4378 | UNG       | -1.06 | 1.27E-02 | 2.43E-02 | 6998.98  | not significant |
| 4379 | TBP       | -1.06 | 1.65E-01 | 2.36E-01 | 875.33   | not significant |
| 4380 | TANGO2    | -1.06 | 1.85E-01 | 2.59E-01 | 806.67   | not significant |
| 4381 | PRDX2     | -1.06 | 1.89E-02 | 3.48E-02 | 4530.96  | not significant |
| 4382 | RNF25     | -1.06 | 2.99E-01 | 3.88E-01 | 441.50   | not significant |
| 4383 | SRP68     | -1.06 | 1.23E-02 | 2.38E-02 | 6052.18  | not significant |
| 4384 | FRYL      | -1.06 | 2.96E-01 | 3.84E-01 | 4702.14  | not significant |
| 4385 | CKS1B     | -1.06 | 1.42E-01 | 2.07E-01 | 1598.58  | not significant |
| 4386 | RPRD1A    | -1.06 | 5.79E-02 | 9.46E-02 | 2353.14  | not significant |
| 4387 | MAP4      | -1.06 | 2.35E-02 | 4.25E-02 | 8272.14  | not significant |
| 4388 | PIGA      | -1.06 | 2.78E-01 | 3.65E-01 | 485.24   | not significant |

|      |           |       |          |          |          |                 |
|------|-----------|-------|----------|----------|----------|-----------------|
| 4389 | MDK       | -1.06 | 4.47E-01 | 5.39E-01 | 145.53   | not significant |
| 4390 | NPTN      | -1.06 | 1.27E-01 | 1.87E-01 | 1273.32  | not significant |
| 4391 | TPGS2     | -1.06 | 1.56E-02 | 2.92E-02 | 5768.18  | not significant |
| 4392 | PVRL3     | -1.06 | 1.19E-01 | 1.78E-01 | 1189.97  | not significant |
| 4393 | LOC643770 | -1.06 | 3.41E-01 | 4.32E-01 | 9.55     | not significant |
| 4394 | MYH7B     | -1.06 | 3.47E-01 | 4.38E-01 | 9.94     | not significant |
| 4395 | TMEM50B   | -1.06 | 3.43E-01 | 4.34E-01 | 299.07   | not significant |
| 4396 | L2HGDH    | -1.06 | 1.35E-01 | 1.98E-01 | 1134.37  | not significant |
| 4397 | RABGAP1   | -1.06 | 7.33E-02 | 1.16E-01 | 1728.29  | not significant |
| 4398 | ADAP1     | -1.06 | 4.77E-01 | 5.68E-01 | 33.73    | not significant |
| 4399 | NECAB3    | -1.06 | 2.70E-01 | 3.56E-01 | 745.97   | not significant |
| 4400 | METTL17   | -1.06 | 7.05E-02 | 1.12E-01 | 2255.21  | not significant |
| 4401 | ADD1      | -1.06 | 4.63E-03 | 9.78E-03 | 9403.91  | not significant |
| 4402 | IFT122    | -1.06 | 1.27E-01 | 1.88E-01 | 1122.31  | not significant |
| 4403 | SRCAP     | -1.06 | 1.70E-02 | 3.16E-02 | 7727.86  | not significant |
| 4404 | SLC39A11  | -1.06 | 1.91E-01 | 2.66E-01 | 866.78   | not significant |
| 4405 | LIAS      | -1.06 | 2.48E-01 | 3.32E-01 | 676.03   | not significant |
| 4406 | DPH1      | -1.05 | 2.82E-01 | 3.70E-01 | 456.47   | not significant |
| 4407 | DUS4L     | -1.05 | 2.19E-01 | 2.99E-01 | 656.15   | not significant |
| 4408 | FAM207A   | -1.05 | 2.18E-01 | 2.98E-01 | 710.42   | not significant |
| 4409 | LINC00152 | -1.05 | 4.32E-01 | 5.24E-01 | 171.50   | not significant |
| 4410 | DUSP7     | -1.05 | 1.64E-01 | 2.34E-01 | 1325.50  | not significant |
| 4411 | SRSF3     | -1.05 | 8.63E-03 | 1.72E-02 | 21848.67 | not significant |
| 4412 | CFAP20    | -1.05 | 6.47E-02 | 1.04E-01 | 3294.12  | not significant |
| 4413 | SRPRB     | -1.05 | 8.71E-02 | 1.35E-01 | 2175.60  | not significant |
| 4414 | TCTEX1D2  | -1.05 | 4.01E-01 | 4.93E-01 | 220.65   | not significant |
| 4415 | ATXN3     | -1.05 | 9.24E-02 | 1.42E-01 | 1483.97  | not significant |
| 4416 | ZNF28     | -1.05 | 1.64E-01 | 2.34E-01 | 1035.10  | not significant |
| 4417 | LAMTOR1   | -1.05 | 7.08E-02 | 1.13E-01 | 2239.18  | not significant |
| 4418 | SP100     | -1.05 | 5.54E-02 | 9.10E-02 | 2217.06  | not significant |
| 4419 | UBR5      | -1.05 | 2.40E-01 | 3.22E-01 | 7820.83  | not significant |
| 4420 | TMED8     | -1.05 | 3.22E-01 | 4.13E-01 | 380.32   | not significant |
| 4421 | RIC1      | -1.05 | 8.35E-02 | 1.30E-01 | 1596.99  | not significant |
| 4422 | ACER2     | -1.05 | 4.34E-01 | 5.26E-01 | 162.14   | not significant |
| 4423 | LRP5L     | -1.05 | 4.02E-01 | 4.93E-01 | 222.65   | not significant |
| 4424 | DRAP1     | -1.05 | 5.95E-02 | 9.69E-02 | 3564.54  | not significant |
| 4425 | SLC26A11  | -1.05 | 3.27E-01 | 4.18E-01 | 8.71     | not significant |
| 4426 | CCDC116   | -1.05 | 4.73E-01 | 5.64E-01 | 27.96    | not significant |
| 4427 | STARD7    | -1.05 | 2.01E-02 | 3.68E-02 | 11509.45 | not significant |
| 4428 | FOXP1     | -1.05 | 1.35E-01 | 1.98E-01 | 1112.84  | not significant |
| 4429 | BTRC      | -1.05 | 1.57E-01 | 2.25E-01 | 988.52   | not significant |
| 4430 | PGGT1B    | -1.05 | 2.31E-01 | 3.13E-01 | 756.29   | not significant |
| 4431 | KLHDC10   | -1.05 | 1.46E-01 | 2.11E-01 | 1077.42  | not significant |
| 4432 | KCTD3     | -1.05 | 1.77E-01 | 2.49E-01 | 866.95   | not significant |
| 4433 | LOC115110 | -1.05 | 4.83E-01 | 5.74E-01 | 33.50    | not significant |
| 4434 | DMC1      | -1.05 | 2.30E-01 | 3.11E-01 | 614.00   | not significant |
| 4435 | SGOL1     | -1.05 | 7.08E-02 | 1.13E-01 | 1902.96  | not significant |
| 4436 | SEPHS1    | -1.05 | 1.70E-02 | 3.17E-02 | 5457.39  | not significant |
| 4437 | TICAM1    | -1.05 | 3.29E-01 | 4.20E-01 | 357.84   | not significant |
| 4438 | MID1IP1   | -1.05 | 4.81E-02 | 8.03E-02 | 3231.59  | not significant |
| 4439 | UFD1L     | -1.05 | 5.60E-02 | 9.18E-02 | 2483.44  | not significant |
| 4440 | CIPC      | -1.05 | 1.43E-01 | 2.08E-01 | 1158.29  | not significant |
| 4441 | COL4A3BP  | -1.05 | 6.67E-02 | 1.07E-01 | 2553.16  | not significant |
| 4442 | RAB6A     | -1.05 | 3.44E-02 | 5.96E-02 | 4051.09  | not significant |
| 4443 | RRP8      | -1.05 | 2.09E-01 | 2.87E-01 | 727.93   | not significant |
| 4444 | ASB8      | -1.05 | 1.22E-01 | 1.81E-01 | 1477.40  | not significant |
| 4445 | SUPT16H   | -1.05 | 1.13E-02 | 2.19E-02 | 14794.36 | not significant |
| 4446 | SWSAP1    | -1.05 | 4.73E-01 | 5.64E-01 | 119.00   | not significant |
| 4447 | ICE1      | -1.05 | 4.06E-02 | 6.89E-02 | 3893.71  | not significant |
| 4448 | OVCA2     | -1.05 | 5.02E-01 | 5.92E-01 | 52.87    | not significant |
| 4449 | GTF2H5    | -1.05 | 2.83E-01 | 3.71E-01 | 572.70   | not significant |
| 4450 | TIAF1     | -1.05 | 3.39E-01 | 4.30E-01 | 8.46     | not significant |
| 4451 | CD6       | -1.05 | 3.95E-02 | 6.72E-02 | 3591.40  | not significant |
| 4452 | SPAG5     | -1.05 | 9.51E-03 | 1.87E-02 | 6750.55  | not significant |
| 4453 | TMEM72    | -1.05 | 5.03E-01 | 5.93E-01 | 51.58    | not significant |
| 4454 | KCTD6     | -1.05 | 4.58E-01 | 5.49E-01 | 168.61   | not significant |
| 4455 | SHMT2     | -1.05 | 1.66E-02 | 3.09E-02 | 9569.94  | not significant |
| 4456 | C2CD2L    | -1.05 | 2.02E-01 | 2.79E-01 | 851.92   | not significant |
| 4457 | HNRNPA3   | -1.05 | 2.46E-02 | 4.42E-02 | 23023.18 | not significant |
| 4458 | BNIP1     | -1.05 | 3.03E-01 | 3.92E-01 | 446.52   | not significant |
| 4459 | DDTL      | -1.05 | 3.30E-01 | 4.21E-01 | 9.82     | not significant |
| 4460 | OTULIN    | -1.05 | 7.00E-02 | 1.12E-01 | 2375.14  | not significant |
| 4461 | PC        | -1.05 | 2.01E-01 | 2.78E-01 | 846.17   | not significant |
| 4462 | FAM189B   | -1.05 | 3.60E-01 | 4.52E-01 | 458.91   | not significant |
| 4463 | NUBP1     | -1.05 | 3.07E-01 | 3.97E-01 | 448.16   | not significant |
| 4464 | FHL1      | -1.05 | 8.55E-02 | 1.33E-01 | 2112.75  | not significant |
| 4465 | LHPP      | -1.05 | 3.49E-01 | 4.41E-01 | 356.32   | not significant |
| 4466 | ARFGEF1   | -1.05 | 1.64E-02 | 3.07E-02 | 5440.10  | not significant |
| 4467 | USP8      | -1.05 | 9.98E-02 | 1.52E-01 | 1850.24  | not significant |
| 4468 | KIAA2013  | -1.05 | 1.10E-01 | 1.66E-01 | 1801.77  | not significant |
| 4469 | ATP8A2    | -1.05 | 2.47E-01 | 3.31E-01 | 632.85   | not significant |
| 4470 | TRAFD1    | -1.05 | 5.70E-02 | 9.31E-02 | 2483.94  | not significant |
| 4471 | GLDN      | -1.05 | 4.86E-01 | 5.76E-01 | 117.87   | not significant |
| 4472 | UGDH      | -1.05 | 2.42E-01 | 3.25E-01 | 661.67   | not significant |
| 4473 | LRSAM1    | -1.05 | 2.66E-01 | 3.52E-01 | 549.10   | not significant |
| 4474 | MRPL37    | -1.05 | 2.20E-02 | 4.01E-02 | 5265.75  | not significant |
| 4475 | CCDC82    | -1.05 | 1.05E-01 | 1.59E-01 | 1516.29  | not significant |
| 4476 | DNPH1     | -1.05 | 2.40E-01 | 3.22E-01 | 636.89   | not significant |

|      |           |       |          |          |          |                 |
|------|-----------|-------|----------|----------|----------|-----------------|
| 4477 | GNPAT     | -1.05 | 5.56E-02 | 9.13E-02 | 2716.87  | not significant |
| 4478 | FBXO31    | -1.05 | 1.36E-01 | 1.99E-01 | 1223.65  | not significant |
| 4479 | BIRC2     | -1.05 | 1.09E-01 | 1.64E-01 | 1571.19  | not significant |
| 4480 | RSRC2     | -1.05 | 7.47E-02 | 1.18E-01 | 3854.08  | not significant |
| 4481 | SON       | -1.05 | 4.99E-02 | 8.30E-02 | 18909.50 | not significant |
| 4482 | MAPRE2    | -1.05 | 2.28E-02 | 4.12E-02 | 5723.75  | not significant |
| 4483 | GPR155    | -1.05 | 2.23E-01 | 3.03E-01 | 758.51   | not significant |
| 4484 | TRAM2-AS1 | -1.05 | 5.08E-01 | 5.97E-01 | 96.00    | not significant |
| 4485 | C15orf37  | -1.05 | 5.03E-01 | 5.93E-01 | 91.41    | not significant |
| 4486 | RHBDD3    | -1.05 | 2.00E-01 | 2.77E-01 | 847.12   | not significant |
| 4487 | ACSL5     | -1.05 | 3.88E-02 | 6.62E-02 | 3239.14  | not significant |
| 4488 | FEN1      | -1.05 | 2.62E-01 | 3.47E-01 | 7743.56  | not significant |
| 4489 | UBQLN4    | -1.05 | 5.83E-02 | 9.51E-02 | 2450.72  | not significant |
| 4490 | RAN       | -1.05 | 2.45E-02 | 4.41E-02 | 29007.40 | not significant |
| 4491 | HHIP      | -1.05 | 1.04E-01 | 1.59E-01 | 1583.47  | not significant |
| 4492 | XAF1      | -1.05 | 1.42E-01 | 2.07E-01 | 1463.70  | not significant |
| 4493 | MFSD3     | -1.05 | 3.52E-01 | 4.44E-01 | 357.93   | not significant |
| 4494 | PTTG1IP   | -1.05 | 5.16E-02 | 8.55E-02 | 2798.66  | not significant |
| 4495 | DICER1    | -1.05 | 5.51E-02 | 9.06E-02 | 5947.68  | not significant |
| 4496 | ATP6V0B   | -1.05 | 8.06E-02 | 1.26E-01 | 2982.98  | not significant |
| 4497 | C9orf78   | -1.05 | 4.78E-02 | 8.00E-02 | 5351.93  | not significant |
| 4498 | FCHO1     | -1.05 | 1.33E-01 | 1.95E-01 | 1645.63  | not significant |
| 4499 | RTN4RL1   | -1.05 | 4.99E-01 | 5.88E-01 | 29.65    | not significant |
| 4500 | DUSP11    | -1.05 | 2.19E-01 | 2.98E-01 | 814.37   | not significant |
| 4501 | RHOA      | -1.05 | 5.10E-03 | 1.07E-02 | 21260.64 | not significant |
| 4502 | TLL1      | -1.05 | 4.78E-01 | 5.69E-01 | 21.14    | not significant |
| 4503 | TMEM184B  | -1.05 | 1.69E-01 | 2.39E-01 | 1285.14  | not significant |
| 4504 | TM2D2     | -1.05 | 2.20E-01 | 3.00E-01 | 804.45   | not significant |
| 4505 | VAMP5     | -1.05 | 1.62E-01 | 2.31E-01 | 1085.21  | not significant |
| 4506 | DTWD1     | -1.05 | 3.65E-01 | 4.57E-01 | 365.18   | not significant |
| 4507 | THOC1     | -1.05 | 1.10E-01 | 1.65E-01 | 1815.93  | not significant |
| 4508 | PRPF18    | -1.05 | 2.01E-01 | 2.78E-01 | 925.91   | not significant |
| 4509 | ZNF202    | -1.05 | 2.37E-01 | 3.19E-01 | 808.87   | not significant |
| 4510 | LRBA      | -1.05 | 9.08E-02 | 1.40E-01 | 3484.92  | not significant |
| 4511 | BBS12     | -1.05 | 5.19E-01 | 6.08E-01 | 45.42    | not significant |
| 4512 | GCHFR     | -1.05 | 3.66E-01 | 4.58E-01 | 355.35   | not significant |
| 4513 | SYAP1     | -1.05 | 2.04E-01 | 2.81E-01 | 1003.37  | not significant |
| 4514 | JAM3      | -1.05 | 3.91E-02 | 6.68E-02 | 3805.23  | not significant |
| 4515 | TPRKB     | -1.05 | 2.18E-01 | 2.98E-01 | 1347.43  | not significant |
| 4516 | CSRP1     | -1.05 | 9.30E-02 | 1.43E-01 | 2154.94  | not significant |
| 4517 | MUL1      | -1.05 | 2.89E-01 | 3.77E-01 | 638.94   | not significant |
| 4518 | PCMT1     | -1.05 | 6.67E-02 | 1.07E-01 | 3693.31  | not significant |
| 4519 | STK38     | -1.05 | 5.47E-02 | 9.00E-02 | 2926.30  | not significant |
| 4520 | TP53RK    | -1.05 | 1.27E-01 | 1.88E-01 | 1615.09  | not significant |
| 4521 | SEC16A    | -1.05 | 9.26E-02 | 1.43E-01 | 4655.37  | not significant |
| 4522 | BAX       | -1.05 | 8.50E-02 | 1.32E-01 | 2370.17  | not significant |
| 4523 | CCDC71    | -1.05 | 2.75E-01 | 3.62E-01 | 601.87   | not significant |
| 4524 | PHF5A     | -1.05 | 1.45E-01 | 2.11E-01 | 2810.51  | not significant |
| 4525 | TET1      | -1.05 | 2.17E-01 | 2.96E-01 | 816.54   | not significant |
| 4526 | OSTM1     | -1.05 | 1.41E-01 | 2.06E-01 | 1442.59  | not significant |
| 4527 | GRB2      | -1.05 | 3.54E-02 | 6.11E-02 | 15653.09 | not significant |
| 4528 | UBE2D2    | -1.05 | 3.62E-02 | 6.23E-02 | 6412.68  | not significant |
| 4529 | THEMIS    | -1.05 | 5.74E-02 | 9.38E-02 | 2869.07  | not significant |
| 4530 | SNRPD2    | -1.05 | 7.51E-02 | 1.19E-01 | 6293.38  | not significant |
| 4531 | MYOM1     | -1.05 | 4.66E-01 | 5.58E-01 | 17.99    | not significant |
| 4532 | C11orf49  | -1.05 | 2.06E-01 | 2.84E-01 | 906.25   | not significant |
| 4533 | FLNA      | -1.05 | 6.51E-02 | 1.05E-01 | 7750.21  | not significant |
| 4534 | AKAP8     | -1.05 | 1.12E-01 | 1.68E-01 | 1627.46  | not significant |
| 4535 | TMSB10    | -1.05 | 3.50E-02 | 6.06E-02 | 18766.11 | not significant |
| 4536 | THAP2     | -1.05 | 4.55E-01 | 5.47E-01 | 208.21   | not significant |
| 4537 | TADA3     | -1.05 | 9.04E-02 | 1.40E-01 | 2467.21  | not significant |
| 4538 | CCDC85C   | -1.05 | 1.18E-01 | 1.76E-01 | 2633.61  | not significant |
| 4539 | OSTF1     | -1.05 | 1.24E-01 | 1.83E-01 | 2013.00  | not significant |
| 4540 | GDE1      | -1.05 | 8.77E-02 | 1.36E-01 | 2333.24  | not significant |
| 4541 | SRSF6     | -1.05 | 2.41E-02 | 4.34E-02 | 14598.16 | not significant |
| 4542 | C19orf71  | -1.05 | 5.14E-01 | 6.03E-01 | 31.86    | not significant |
| 4543 | CDC16     | -1.05 | 1.27E-01 | 1.87E-01 | 2263.09  | not significant |
| 4544 | TRIM38    | -1.05 | 1.73E-01 | 2.45E-01 | 1248.06  | not significant |
| 4545 | GNB1      | -1.05 | 1.94E-02 | 3.56E-02 | 22227.28 | not significant |
| 4546 | ZNF121    | -1.05 | 5.22E-01 | 6.10E-01 | 426.14   | not significant |
| 4547 | THOC2     | -1.05 | 3.19E-02 | 5.58E-02 | 5940.91  | not significant |
| 4548 | LPXN      | -1.05 | 3.83E-02 | 6.56E-02 | 3818.89  | not significant |
| 4549 | CUL5      | -1.05 | 1.29E-01 | 1.91E-01 | 1661.90  | not significant |
| 4550 | ATG4A     | -1.05 | 3.24E-01 | 4.15E-01 | 477.31   | not significant |
| 4551 | ARL3      | -1.05 | 3.27E-01 | 4.18E-01 | 463.79   | not significant |
| 4552 | DIS3L2    | -1.05 | 1.73E-01 | 2.45E-01 | 1179.63  | not significant |
| 4553 | ATP11B    | -1.05 | 2.43E-02 | 4.38E-02 | 7735.33  | not significant |
| 4554 | TCF7      | -1.05 | 8.59E-03 | 1.71E-02 | 43046.99 | not significant |
| 4555 | PPP1R18   | -1.05 | 3.98E-01 | 4.90E-01 | 328.63   | not significant |
| 4556 | ADAMTS7   | -1.05 | 4.33E-01 | 5.25E-01 | 14.01    | not significant |
| 4557 | CDK8      | -1.05 | 2.06E-01 | 2.84E-01 | 1039.31  | not significant |
| 4558 | RHOBTB1   | -1.05 | 3.75E-01 | 4.67E-01 | 348.68   | not significant |
| 4559 | MTO1      | -1.05 | 1.29E-01 | 1.91E-01 | 1630.96  | not significant |
| 4560 | AKIRIN1   | -1.05 | 9.71E-02 | 1.49E-01 | 2641.46  | not significant |
| 4561 | TWF2      | -1.05 | 1.43E-01 | 2.09E-01 | 3088.17  | not significant |
| 4562 | SRRM1     | -1.05 | 4.89E-02 | 8.15E-02 | 5571.64  | not significant |
| 4563 | KIF2C     | -1.05 | 2.07E-02 | 3.79E-02 | 5601.76  | not significant |
| 4564 | YY1       | -1.05 | 2.64E-02 | 4.71E-02 | 6657.25  | not significant |

|      |           |       |          |          |          |                 |
|------|-----------|-------|----------|----------|----------|-----------------|
| 4565 | PDK3      | -1.05 | 1.51E-01 | 2.18E-01 | 1584.89  | not significant |
| 4566 | JAKMIP3   | -1.05 | 5.36E-01 | 6.23E-01 | 47.83    | not significant |
| 4567 | NAAA      | -1.05 | 4.12E-01 | 5.03E-01 | 287.46   | not significant |
| 4568 | MED30     | -1.05 | 1.91E-01 | 2.66E-01 | 1316.81  | not significant |
| 4569 | MANEA     | -1.05 | 1.24E-01 | 1.84E-01 | 1894.17  | not significant |
| 4570 | HOMER2    | -1.05 | 3.57E-01 | 4.48E-01 | 429.42   | not significant |
| 4571 | TRIM3     | -1.05 | 5.36E-01 | 6.23E-01 | 76.55    | not significant |
| 4572 | BRAT1     | -1.05 | 9.98E-02 | 1.52E-01 | 2454.53  | not significant |
| 4573 | SELT      | -1.05 | 6.60E-02 | 1.06E-01 | 3070.89  | not significant |
| 4574 | ITGAE     | -1.05 | 6.89E-02 | 1.10E-01 | 3299.92  | not significant |
| 4575 | SMG1P1    | -1.05 | 5.34E-01 | 6.22E-01 | 72.45    | not significant |
| 4576 | ATR       | -1.05 | 1.19E-01 | 1.78E-01 | 2055.94  | not significant |
| 4577 | PPP1R3B   | -1.05 | 2.88E-01 | 3.76E-01 | 615.50   | not significant |
| 4578 | TCEA1     | -1.05 | 8.33E-02 | 1.30E-01 | 3238.86  | not significant |
| 4579 | LPIN1     | -1.05 | 3.74E-02 | 6.42E-02 | 4819.19  | not significant |
| 4580 | CCDC136   | -1.05 | 2.82E-01 | 3.70E-01 | 844.41   | not significant |
| 4581 | FOPNL     | -1.05 | 5.05E-02 | 8.39E-02 | 3781.33  | not significant |
| 4582 | CLDND2    | -1.05 | 4.00E-01 | 4.92E-01 | 9.65     | not significant |
| 4583 | CSNK1G2   | -1.05 | 5.58E-02 | 9.15E-02 | 6106.18  | not significant |
| 4584 | TBC1D31   | -1.05 | 1.76E-01 | 2.48E-01 | 1265.91  | not significant |
| 4585 | USP6NL    | -1.05 | 1.66E-01 | 2.36E-01 | 1607.37  | not significant |
| 4586 | NOVA1     | -1.05 | 5.04E-01 | 5.94E-01 | 143.66   | not significant |
| 4587 | NAF1      | -1.05 | 2.11E-01 | 2.89E-01 | 960.57   | not significant |
| 4588 | APBA2     | -1.05 | 1.56E-01 | 2.24E-01 | 1323.38  | not significant |
| 4589 | WDR74     | -1.05 | 1.57E-01 | 2.25E-01 | 1384.53  | not significant |
| 4590 | TBC1D25   | -1.05 | 5.43E-01 | 6.29E-01 | 50.59    | not significant |
| 4591 | TRPV2     | -1.05 | 1.63E-01 | 2.33E-01 | 1286.29  | not significant |
| 4592 | POLR2H    | -1.05 | 1.51E-01 | 2.17E-01 | 1834.51  | not significant |
| 4593 | MRPL53    | -1.05 | 2.93E-01 | 3.81E-01 | 667.70   | not significant |
| 4594 | RFC4      | -1.05 | 8.72E-02 | 1.35E-01 | 3442.09  | not significant |
| 4595 | CDH26     | -1.05 | 4.34E-01 | 5.26E-01 | 12.60    | not significant |
| 4596 | YBX2      | -1.05 | 5.27E-01 | 6.15E-01 | 100.11   | not significant |
| 4597 | TMEM81    | -1.05 | 5.36E-01 | 6.24E-01 | 93.27    | not significant |
| 4598 | LRRC63    | -1.05 | 5.46E-01 | 6.32E-01 | 43.82    | not significant |
| 4599 | EIF3D     | -1.05 | 2.59E-02 | 4.63E-02 | 10425.93 | not significant |
| 4600 | MUM1      | -1.05 | 1.58E-01 | 2.26E-01 | 1328.70  | not significant |
| 4601 | RNF141    | -1.05 | 2.22E-01 | 3.03E-01 | 940.46   | not significant |
| 4602 | APP       | -1.05 | 5.24E-01 | 6.12E-01 | 26.53    | not significant |
| 4603 | NKIRAS2   | -1.05 | 4.71E-01 | 5.63E-01 | 258.43   | not significant |
| 4604 | ZNF263    | -1.05 | 1.59E-01 | 2.28E-01 | 1510.37  | not significant |
| 4605 | PGBD1     | -1.05 | 3.62E-01 | 4.54E-01 | 426.93   | not significant |
| 4606 | HAS3      | -1.05 | 5.50E-01 | 6.36E-01 | 49.71    | not significant |
| 4607 | DBNL      | -1.05 | 5.39E-02 | 8.89E-02 | 6315.73  | not significant |
| 4608 | MCTS1     | -1.05 | 1.45E-01 | 2.11E-01 | 1818.38  | not significant |
| 4609 | REV3L     | -1.05 | 1.06E-01 | 1.61E-01 | 2351.21  | not significant |
| 4610 | ANKRD32   | -1.05 | 1.57E-01 | 2.26E-01 | 1441.68  | not significant |
| 4611 | TMEM127   | -1.05 | 1.59E-01 | 2.28E-01 | 1625.54  | not significant |
| 4612 | LMAN1     | -1.05 | 2.67E-02 | 4.76E-02 | 8213.33  | not significant |
| 4613 | DOCK9     | -1.05 | 2.07E-01 | 2.84E-01 | 1174.09  | not significant |
| 4614 | ABHD17A   | -1.05 | 2.06E-01 | 2.84E-01 | 1028.78  | not significant |
| 4615 | LRRC38    | -1.05 | 5.38E-01 | 6.25E-01 | 32.87    | not significant |
| 4616 | MAF1      | -1.05 | 7.10E-02 | 1.13E-01 | 5007.22  | not significant |
| 4617 | AIFM2     | -1.05 | 5.41E-01 | 6.28E-01 | 87.59    | not significant |
| 4618 | STAU2     | -1.05 | 2.70E-02 | 4.81E-02 | 5803.02  | not significant |
| 4619 | MAGED2    | -1.05 | 1.10E-01 | 1.65E-01 | 2134.62  | not significant |
| 4620 | SLC35E3   | -1.05 | 3.90E-01 | 4.83E-01 | 411.70   | not significant |
| 4621 | ERGIC2    | -1.05 | 1.93E-01 | 2.68E-01 | 1162.49  | not significant |
| 4622 | WBP4      | -1.05 | 1.95E-01 | 2.70E-01 | 1291.02  | not significant |
| 4623 | OST4      | -1.05 | 6.94E-02 | 1.11E-01 | 3006.82  | not significant |
| 4624 | ELMO3     | -1.05 | 5.40E-01 | 6.27E-01 | 122.42   | not significant |
| 4625 | PTPN11    | -1.05 | 8.98E-02 | 1.39E-01 | 14315.15 | not significant |
| 4626 | DHX36     | -1.05 | 9.37E-02 | 1.44E-01 | 2475.36  | not significant |
| 4627 | CMTM6     | -1.05 | 3.33E-02 | 5.80E-02 | 7932.02  | not significant |
| 4628 | C19orf10  | -1.05 | 1.58E-01 | 2.26E-01 | 1692.46  | not significant |
| 4629 | LPCAT3    | -1.05 | 3.17E-01 | 4.07E-01 | 580.47   | not significant |
| 4630 | GLA       | -1.05 | 4.84E-01 | 5.75E-01 | 201.41   | not significant |
| 4631 | SH3D21    | -1.05 | 5.56E-01 | 6.41E-01 | 59.77    | not significant |
| 4632 | TNFAIP8L2 | -1.05 | 5.23E-01 | 6.11E-01 | 23.15    | not significant |
| 4633 | UAP1      | -1.05 | 1.96E-01 | 2.71E-01 | 1330.51  | not significant |
| 4634 | ZPR1      | -1.05 | 1.48E-01 | 2.14E-01 | 1550.77  | not significant |
| 4635 | USP31     | -1.05 | 3.02E-01 | 3.92E-01 | 610.35   | not significant |
| 4636 | IPO9      | -1.05 | 4.21E-02 | 7.12E-02 | 4978.07  | not significant |
| 4637 | ERIC1     | -1.05 | 1.88E-01 | 2.62E-01 | 1372.17  | not significant |
| 4638 | TAF10     | -1.05 | 1.59E-01 | 2.28E-01 | 2296.36  | not significant |
| 4639 | SV2A      | -1.05 | 3.65E-01 | 4.57E-01 | 446.51   | not significant |
| 4640 | ZCCHC10   | -1.05 | 1.97E-01 | 2.73E-01 | 1126.44  | not significant |
| 4641 | KIAA1024  | -1.05 | 5.49E-01 | 6.35E-01 | 87.98    | not significant |
| 4642 | INO80E    | -1.05 | 9.29E-02 | 1.43E-01 | 2486.12  | not significant |
| 4643 | PORCN     | -1.05 | 5.57E-01 | 6.42E-01 | 43.99    | not significant |
| 4644 | LAMTOR4   | -1.05 | 1.73E-01 | 2.45E-01 | 1498.81  | not significant |
| 4645 | SLC22A5   | -1.05 | 4.22E-01 | 5.14E-01 | 313.73   | not significant |
| 4646 | CCDC88A   | -1.05 | 4.02E-01 | 4.93E-01 | 4522.94  | not significant |
| 4647 | LRRC37A3  | -1.05 | 5.61E-01 | 6.46E-01 | 59.13    | not significant |
| 4648 | RAD18     | -1.05 | 7.80E-02 | 1.23E-01 | 2698.46  | not significant |
| 4649 | NCOA6     | -1.05 | 9.17E-02 | 1.42E-01 | 5158.08  | not significant |
| 4650 | HORMAD2   | -1.05 | 4.62E-01 | 5.54E-01 | 13.16    | not significant |
| 4651 | UBE2A     | -1.05 | 4.94E-02 | 8.22E-02 | 4370.68  | not significant |
| 4652 | SMAD5     | -1.05 | 3.79E-01 | 4.70E-01 | 445.64   | not significant |

|      |           |       |          |          |          |                 |
|------|-----------|-------|----------|----------|----------|-----------------|
| 4653 | FNTB      | -1.05 | 5.62E-01 | 6.46E-01 | 44.21    | not significant |
| 4654 | FIP1L1    | -1.05 | 7.01E-02 | 1.12E-01 | 3216.92  | not significant |
| 4655 | GTF2F2    | -1.05 | 2.19E-01 | 2.99E-01 | 1459.01  | not significant |
| 4656 | GALNT10   | -1.05 | 1.97E-01 | 2.73E-01 | 1312.20  | not significant |
| 4657 | TTC30B    | -1.05 | 5.54E-01 | 6.39E-01 | 94.40    | not significant |
| 4658 | PSMG4     | -1.05 | 2.88E-01 | 3.76E-01 | 736.24   | not significant |
| 4659 | ARF6      | -1.05 | 3.47E-02 | 6.01E-02 | 6736.43  | not significant |
| 4660 | GBP4      | -1.05 | 1.28E-01 | 1.89E-01 | 1901.30  | not significant |
| 4661 | ACOT8     | -1.05 | 2.71E-01 | 3.57E-01 | 825.87   | not significant |
| 4662 | HIF1A     | -1.05 | 5.48E-02 | 9.02E-02 | 4136.60  | not significant |
| 4663 | PRR34-AS1 | -1.05 | 5.48E-01 | 6.34E-01 | 110.06   | not significant |
| 4664 | ERCC3     | -1.05 | 1.06E-01 | 1.61E-01 | 2662.59  | not significant |
| 4665 | ZNF689    | -1.05 | 1.73E-01 | 2.45E-01 | 1425.96  | not significant |
| 4666 | RASSF1    | -1.05 | 4.12E-01 | 5.03E-01 | 365.26   | not significant |
| 4667 | SLC25A51  | -1.05 | 3.57E-01 | 4.49E-01 | 504.11   | not significant |
| 4668 | UBA2      | -1.04 | 5.22E-02 | 8.63E-02 | 8613.27  | not significant |
| 4669 | UBA6      | -1.04 | 1.08E-01 | 1.63E-01 | 3422.29  | not significant |
| 4670 | USP1      | -1.04 | 4.10E-02 | 6.95E-02 | 9140.61  | not significant |
| 4671 | GJA3      | -1.04 | 5.44E-01 | 6.30E-01 | 26.49    | not significant |
| 4672 | TMEM131   | -1.04 | 7.68E-02 | 1.21E-01 | 3233.46  | not significant |
| 4673 | VPS37A    | -1.04 | 2.05E-01 | 2.83E-01 | 1516.87  | not significant |
| 4674 | OSM       | -1.04 | 2.55E-01 | 3.40E-01 | 860.13   | not significant |
| 4675 | TMEM184C  | -1.04 | 1.63E-01 | 2.33E-01 | 1695.75  | not significant |
| 4676 | VSIG10L   | -1.04 | 5.65E-01 | 6.49E-01 | 41.96    | not significant |
| 4677 | AKNA      | -1.04 | 5.41E-02 | 8.92E-02 | 8684.11  | not significant |
| 4678 | REXO2     | -1.04 | 2.96E-01 | 3.84E-01 | 820.38   | not significant |
| 4679 | NMNAT1    | -1.04 | 4.03E-01 | 4.95E-01 | 391.65   | not significant |
| 4680 | PPP1CB    | -1.04 | 3.87E-02 | 6.61E-02 | 7328.08  | not significant |
| 4681 | SLC39A3   | -1.04 | 1.99E-01 | 2.75E-01 | 1396.22  | not significant |
| 4682 | GMPS      | -1.04 | 6.45E-02 | 1.04E-01 | 4198.08  | not significant |
| 4683 | IL21R     | -1.04 | 5.67E-01 | 6.51E-01 | 37.80    | not significant |
| 4684 | SKA2      | -1.04 | 4.50E-02 | 7.58E-02 | 5850.49  | not significant |
| 4685 | UGP2      | -1.04 | 5.32E-02 | 8.78E-02 | 12797.60 | not significant |
| 4686 | SIRT5     | -1.04 | 3.61E-01 | 4.53E-01 | 545.86   | not significant |
| 4687 | COA1      | -1.04 | 1.20E-01 | 1.79E-01 | 3458.66  | not significant |
| 4688 | POLR2C    | -1.04 | 8.65E-02 | 1.34E-01 | 4047.28  | not significant |
| 4689 | GINS2     | -1.04 | 1.23E-01 | 1.83E-01 | 3108.57  | not significant |
| 4690 | RNF14     | -1.04 | 1.38E-01 | 2.02E-01 | 1932.68  | not significant |
| 4691 | RNF144B   | -1.04 | 5.05E-01 | 5.95E-01 | 16.24    | not significant |
| 4692 | TTPAL     | -1.04 | 2.30E-01 | 3.11E-01 | 1123.78  | not significant |
| 4693 | SCNM1     | -1.04 | 4.72E-01 | 5.64E-01 | 12.27    | not significant |
| 4694 | RASSF3    | -1.04 | 1.64E-01 | 2.34E-01 | 1896.42  | not significant |
| 4695 | DSTYK     | -1.04 | 4.83E-01 | 5.73E-01 | 243.61   | not significant |
| 4696 | KRCC1     | -1.04 | 3.17E-01 | 4.08E-01 | 650.19   | not significant |
| 4697 | GNAZ      | -1.04 | 4.65E-01 | 5.57E-01 | 11.97    | not significant |
| 4698 | RPA1      | -1.04 | 5.37E-02 | 8.86E-02 | 11675.76 | not significant |
| 4699 | SORBS3    | -1.04 | 1.18E-01 | 1.76E-01 | 2130.05  | not significant |
| 4700 | KIF9-AS1  | -1.04 | 5.51E-01 | 6.36E-01 | 26.20    | not significant |
| 4701 | GNL1      | -1.04 | 2.61E-01 | 3.46E-01 | 1040.64  | not significant |
| 4702 | ANKFN1    | -1.04 | 3.10E-01 | 4.00E-01 | 689.79   | not significant |
| 4703 | MED11     | -1.04 | 4.38E-01 | 5.30E-01 | 340.70   | not significant |
| 4704 | FAM83G    | -1.04 | 5.08E-01 | 5.97E-01 | 197.22   | not significant |
| 4705 | NFE2L3    | -1.04 | 4.88E-01 | 5.78E-01 | 244.48   | not significant |
| 4706 | TMEM2     | -1.04 | 3.36E-01 | 4.27E-01 | 660.09   | not significant |
| 4707 | TIMM10B   | -1.04 | 1.37E-01 | 2.00E-01 | 1913.86  | not significant |
| 4708 | ZNF396    | -1.04 | 4.19E-01 | 5.11E-01 | 8.21     | not significant |
| 4709 | MFAP3     | -1.04 | 1.47E-01 | 2.13E-01 | 1894.75  | not significant |
| 4710 | USP16     | -1.04 | 1.06E-01 | 1.61E-01 | 2462.87  | not significant |
| 4711 | SLC35F6   | -1.04 | 2.35E-01 | 3.17E-01 | 1063.05  | not significant |
| 4712 | SLC35G2   | -1.04 | 5.25E-01 | 6.13E-01 | 172.08   | not significant |
| 4713 | TTC8      | -1.04 | 5.65E-01 | 6.49E-01 | 105.91   | not significant |
| 4714 | NF2       | -1.04 | 1.65E-01 | 2.35E-01 | 2275.08  | not significant |
| 4715 | GGA1      | -1.04 | 2.11E-01 | 2.89E-01 | 1565.47  | not significant |
| 4716 | RNASEH2B  | -1.04 | 4.88E-02 | 8.14E-02 | 6627.55  | not significant |
| 4717 | TRAF3IP1  | -1.04 | 3.75E-01 | 4.67E-01 | 515.81   | not significant |
| 4718 | B4GALT7   | -1.04 | 4.61E-01 | 5.53E-01 | 295.65   | not significant |
| 4719 | LOC728730 | -1.04 | 5.83E-01 | 6.65E-01 | 54.41    | not significant |
| 4720 | EIF2B4    | -1.04 | 2.99E-01 | 3.88E-01 | 796.91   | not significant |
| 4721 | USP43     | -1.04 | 5.68E-01 | 6.51E-01 | 32.66    | not significant |
| 4722 | ISPD      | -1.04 | 5.57E-01 | 6.42E-01 | 132.61   | not significant |
| 4723 | ANTXR2    | -1.04 | 5.72E-01 | 6.56E-01 | 36.59    | not significant |
| 4724 | MESDC2    | -1.04 | 1.92E-01 | 2.67E-01 | 2274.49  | not significant |
| 4725 | EP300-AS1 | -1.04 | 5.62E-01 | 6.46E-01 | 31.24    | not significant |
| 4726 | MIF-AS1   | -1.04 | 5.12E-01 | 6.01E-01 | 375.27   | not significant |
| 4727 | C1orf123  | -1.04 | 2.97E-01 | 3.86E-01 | 865.22   | not significant |
| 4728 | USP15     | -1.04 | 1.37E-01 | 2.00E-01 | 3185.37  | not significant |
| 4729 | MBD3      | -1.04 | 7.25E-02 | 1.15E-01 | 5272.49  | not significant |
| 4730 | CCDC186   | -1.04 | 3.74E-01 | 4.66E-01 | 564.62   | not significant |
| 4731 | SMDT1     | -1.04 | 5.05E-01 | 5.94E-01 | 240.78   | not significant |
| 4732 | RBMXL1    | -1.04 | 2.27E-01 | 3.08E-01 | 1448.02  | not significant |
| 4733 | HELLS     | -1.04 | 1.30E-01 | 1.91E-01 | 2393.67  | not significant |
| 4734 | MBIP      | -1.04 | 3.21E-01 | 4.12E-01 | 769.71   | not significant |
| 4735 | AES       | -1.04 | 8.96E-02 | 1.39E-01 | 15217.33 | not significant |
| 4736 | CHKB-AS1  | -1.04 | 5.83E-01 | 6.65E-01 | 34.33    | not significant |
| 4737 | STRN      | -1.04 | 1.15E-01 | 1.72E-01 | 3984.48  | not significant |
| 4738 | CEP83-AS1 | -1.04 | 5.54E-01 | 6.39E-01 | 22.69    | not significant |
| 4739 | TP53INP2  | -1.04 | 5.03E-01 | 5.93E-01 | 238.11   | not significant |
| 4740 | DET1      | -1.04 | 5.49E-01 | 6.35E-01 | 164.96   | not significant |

|      |            |       |          |          |          |                 |
|------|------------|-------|----------|----------|----------|-----------------|
| 4741 | STYX       | -1.04 | 1.78E-01 | 2.50E-01 | 1849.34  | not significant |
| 4742 | TPHP2      | -1.04 | 5.90E-01 | 6.72E-01 | 43.44    | not significant |
| 4743 | RER1       | -1.04 | 1.22E-01 | 1.81E-01 | 3832.18  | not significant |
| 4744 | LPAR4      | -1.04 | 5.40E-01 | 6.27E-01 | 19.38    | not significant |
| 4745 | HMGB1      | -1.04 | 7.83E-02 | 1.23E-01 | 19601.01 | not significant |
| 4746 | TRIM2      | -1.04 | 5.81E-01 | 6.64E-01 | 30.98    | not significant |
| 4747 | CTTNBP2NL  | -1.04 | 5.32E-01 | 6.20E-01 | 186.82   | not significant |
| 4748 | KATNB1     | -1.04 | 2.53E-01 | 3.37E-01 | 1069.42  | not significant |
| 4749 | MTHFD1     | -1.04 | 3.86E-02 | 6.59E-02 | 9808.54  | not significant |
| 4750 | SLC9A6     | -1.04 | 5.59E-01 | 6.44E-01 | 142.38   | not significant |
| 4751 | MANSC1     | -1.04 | 4.51E-01 | 5.43E-01 | 9.08     | not significant |
| 4752 | SNX29      | -1.04 | 2.61E-01 | 3.46E-01 | 1096.16  | not significant |
| 4753 | GTDC1      | -1.04 | 4.97E-01 | 5.87E-01 | 277.84   | not significant |
| 4754 | LINC01144  | -1.04 | 5.65E-01 | 6.49E-01 | 22.98    | not significant |
| 4755 | PBRM1      | -1.04 | 8.05E-02 | 1.26E-01 | 8729.17  | not significant |
| 4756 | TPM1       | -1.04 | 5.95E-01 | 6.76E-01 | 47.31    | not significant |
| 4757 | TMEM102    | -1.04 | 4.98E-01 | 5.88E-01 | 339.48   | not significant |
| 4758 | ZNF639     | -1.04 | 1.62E-01 | 2.32E-01 | 2131.56  | not significant |
| 4759 | STON2      | -1.04 | 5.96E-01 | 6.77E-01 | 57.26    | not significant |
| 4760 | C9orf156   | -1.04 | 4.93E-01 | 5.84E-01 | 278.41   | not significant |
| 4761 | SBNO1      | -1.04 | 1.04E-01 | 1.58E-01 | 4651.41  | not significant |
| 4762 | SCARNA9    | -1.04 | 5.40E-01 | 6.27E-01 | 18.05    | not significant |
| 4763 | COX5A      | -1.04 | 1.16E-01 | 1.73E-01 | 3372.58  | not significant |
| 4764 | POLG2      | -1.04 | 5.42E-01 | 6.29E-01 | 179.43   | not significant |
| 4765 | TTC30A     | -1.04 | 5.98E-01 | 6.78E-01 | 60.58    | not significant |
| 4766 | RILPL2     | -1.04 | 2.86E-01 | 3.74E-01 | 1056.07  | not significant |
| 4767 | HSBP1      | -1.04 | 1.64E-01 | 2.34E-01 | 1864.21  | not significant |
| 4768 | ATP5C1     | -1.04 | 5.47E-02 | 9.00E-02 | 7884.49  | not significant |
| 4769 | RNF13      | -1.04 | 2.86E-01 | 3.75E-01 | 1004.05  | not significant |
| 4770 | PLEKHA4    | -1.04 | 6.01E-01 | 6.80E-01 | 58.34    | not significant |
| 4771 | TRMT10B    | -1.04 | 4.64E-01 | 5.56E-01 | 401.92   | not significant |
| 4772 | ERCC8      | -1.04 | 3.40E-01 | 4.32E-01 | 701.38   | not significant |
| 4773 | RFC2       | -1.04 | 2.16E-01 | 2.95E-01 | 1891.10  | not significant |
| 4774 | LRRC16A    | -1.04 | 5.51E-01 | 6.37E-01 | 18.45    | not significant |
| 4775 | ZSCAN30    | -1.04 | 3.84E-01 | 4.76E-01 | 680.49   | not significant |
| 4776 | ZSWIM1     | -1.04 | 4.12E-01 | 5.04E-01 | 463.35   | not significant |
| 4777 | APOOL      | -1.04 | 2.93E-01 | 3.81E-01 | 899.86   | not significant |
| 4778 | PDS5B      | -1.04 | 1.65E-01 | 2.35E-01 | 4175.88  | not significant |
| 4779 | ZSCAN5A    | -1.04 | 5.65E-01 | 6.49E-01 | 144.51   | not significant |
| 4780 | LSM7       | -1.04 | 5.30E-01 | 6.18E-01 | 1912.11  | not significant |
| 4781 | NLRP14     | -1.04 | 6.01E-01 | 6.81E-01 | 72.78    | not significant |
| 4782 | GIMAP7     | -1.04 | 1.18E-01 | 1.75E-01 | 7868.25  | not significant |
| 4783 | TBC1D23    | -1.04 | 2.70E-01 | 3.56E-01 | 1196.09  | not significant |
| 4784 | ERCC2      | -1.04 | 2.90E-01 | 3.78E-01 | 1003.32  | not significant |
| 4785 | TRAPPC12   | -1.04 | 2.61E-01 | 3.46E-01 | 1329.97  | not significant |
| 4786 | SCMH1      | -1.04 | 1.34E-01 | 1.96E-01 | 2749.46  | not significant |
| 4787 | ZRANB2     | -1.04 | 1.07E-01 | 1.62E-01 | 5937.93  | not significant |
| 4788 | EHBP1L1    | -1.04 | 1.17E-01 | 1.75E-01 | 2756.24  | not significant |
| 4789 | FAF1       | -1.04 | 9.52E-02 | 1.46E-01 | 3554.47  | not significant |
| 4790 | LMNB2      | -1.04 | 9.20E-02 | 1.42E-01 | 11841.44 | not significant |
| 4791 | RNMT       | -1.04 | 1.46E-01 | 2.12E-01 | 3538.37  | not significant |
| 4792 | SLC16A13   | -1.04 | 5.23E-01 | 6.12E-01 | 231.04   | not significant |
| 4793 | YAE1D1     | -1.04 | 5.20E-01 | 6.08E-01 | 237.05   | not significant |
| 4794 | PSMC6      | -1.04 | 1.50E-01 | 2.17E-01 | 2495.64  | not significant |
| 4795 | SIRT3      | -1.04 | 4.48E-01 | 5.40E-01 | 397.39   | not significant |
| 4796 | C9orf89    | -1.04 | 4.56E-01 | 5.48E-01 | 392.92   | not significant |
| 4797 | RNF157-AS1 | -1.04 | 4.84E-01 | 5.74E-01 | 11.12    | not significant |
| 4798 | ATRX       | -1.04 | 3.35E-01 | 4.27E-01 | 812.86   | not significant |
| 4799 | MCF2       | -1.04 | 5.91E-01 | 6.72E-01 | 28.61    | not significant |
| 4800 | RPP14      | -1.04 | 2.48E-01 | 3.32E-01 | 1259.15  | not significant |
| 4801 | MANBAL     | -1.04 | 4.17E-01 | 5.08E-01 | 525.18   | not significant |
| 4802 | AVEN       | -1.04 | 4.32E-01 | 5.24E-01 | 466.91   | not significant |
| 4803 | SH3BP5L    | -1.04 | 1.76E-01 | 2.49E-01 | 1823.07  | not significant |
| 4804 | BBS4       | -1.04 | 4.42E-01 | 5.35E-01 | 417.75   | not significant |
| 4805 | PTPRVP     | -1.04 | 5.87E-01 | 6.69E-01 | 30.95    | not significant |
| 4806 | AMZ2P1     | -1.04 | 3.96E-01 | 4.88E-01 | 591.83   | not significant |
| 4807 | ITGA9-AS1  | -1.04 | 5.88E-01 | 6.69E-01 | 27.04    | not significant |
| 4808 | DECR2      | -1.04 | 4.50E-01 | 5.43E-01 | 398.14   | not significant |
| 4809 | MED4       | -1.04 | 1.26E-01 | 1.87E-01 | 3357.48  | not significant |
| 4810 | LINC00662  | -1.04 | 5.78E-01 | 6.61E-01 | 147.39   | not significant |
| 4811 | SMIM19     | -1.04 | 4.00E-01 | 4.91E-01 | 594.75   | not significant |
| 4812 | TRIP11     | -1.04 | 2.76E-01 | 3.63E-01 | 1293.95  | not significant |
| 4813 | TOMM70A    | -1.04 | 6.07E-02 | 9.85E-02 | 6432.55  | not significant |
| 4814 | AUNIP      | -1.04 | 4.43E-01 | 5.36E-01 | 413.13   | not significant |
| 4815 | AMDHD1     | -1.04 | 5.15E-01 | 6.03E-01 | 11.74    | not significant |
| 4816 | PIZO1      | -1.04 | 3.95E-01 | 4.87E-01 | 9867.00  | not significant |
| 4817 | NAA16      | -1.04 | 3.39E-01 | 4.30E-01 | 1462.54  | not significant |
| 4818 | CDKN2AIP   | -1.04 | 2.04E-01 | 2.82E-01 | 1655.57  | not significant |
| 4819 | RFX7       | -1.04 | 1.60E-01 | 2.29E-01 | 3413.65  | not significant |
| 4820 | APAF1      | -1.04 | 1.83E-01 | 2.56E-01 | 2047.78  | not significant |
| 4821 | GLB1       | -1.04 | 2.57E-01 | 3.42E-01 | 1440.10  | not significant |
| 4822 | NLRP1      | -1.04 | 4.95E-01 | 5.85E-01 | 346.08   | not significant |
| 4823 | ZMYND19    | -1.04 | 3.37E-01 | 4.29E-01 | 850.62   | not significant |
| 4824 | ZSCAN22    | -1.04 | 5.90E-01 | 6.72E-01 | 126.96   | not significant |
| 4825 | BRI3BP     | -1.04 | 2.26E-01 | 3.07E-01 | 1506.77  | not significant |
| 4826 | EMC4       | -1.04 | 1.98E-01 | 2.75E-01 | 1737.36  | not significant |
| 4827 | SP110      | -1.04 | 2.37E-01 | 3.19E-01 | 1551.67  | not significant |
| 4828 | ELOVL4     | -1.04 | 2.66E-01 | 3.52E-01 | 1271.02  | not significant |

|      |              |       |          |          |          |                 |
|------|--------------|-------|----------|----------|----------|-----------------|
| 4829 | RNF34        | -1.04 | 5.50E-01 | 6.35E-01 | 231.35   | not significant |
| 4830 | ITCH         | -1.04 | 8.04E-02 | 1.26E-01 | 5535.78  | not significant |
| 4831 | GLE1         | -1.04 | 1.73E-01 | 2.45E-01 | 2541.48  | not significant |
| 4832 | SLC43A2      | -1.04 | 5.47E-01 | 6.33E-01 | 213.82   | not significant |
| 4833 | TMED5        | -1.04 | 6.75E-02 | 1.08E-01 | 5802.32  | not significant |
| 4834 | NDUFA10      | -1.04 | 1.33E-01 | 1.95E-01 | 2728.46  | not significant |
| 4835 | LRRC8B       | -1.04 | 4.30E-01 | 5.22E-01 | 469.45   | not significant |
| 4836 | MCM2         | -1.04 | 5.89E-02 | 9.59E-02 | 16370.09 | not significant |
| 4837 | ZC3H4        | -1.04 | 1.52E-01 | 2.19E-01 | 3103.90  | not significant |
| 4838 | COA5         | -1.04 | 3.24E-01 | 4.15E-01 | 978.97   | not significant |
| 4839 | BIN3         | -1.04 | 3.38E-01 | 4.30E-01 | 1058.59  | not significant |
| 4840 | CAST         | -1.04 | 3.27E-01 | 4.18E-01 | 970.37   | not significant |
| 4841 | FAM126B      | -1.04 | 2.56E-01 | 3.40E-01 | 1690.44  | not significant |
| 4842 | ZNF654       | -1.04 | 3.19E-01 | 4.10E-01 | 964.99   | not significant |
| 4843 | RAG2         | -1.04 | 6.16E-01 | 6.94E-01 | 39.29    | not significant |
| 4844 | BROX         | -1.04 | 3.61E-01 | 4.53E-01 | 911.76   | not significant |
| 4845 | SLC7A6OS     | -1.04 | 4.29E-01 | 5.21E-01 | 504.20   | not significant |
| 4846 | PLOD3        | -1.04 | 5.61E-01 | 6.45E-01 | 184.77   | not significant |
| 4847 | C6orf106     | -1.04 | 1.99E-01 | 2.75E-01 | 4172.64  | not significant |
| 4848 | LRR1Q3       | -1.04 | 5.91E-01 | 6.72E-01 | 25.30    | not significant |
| 4849 | LOC100506730 | -1.04 | 5.66E-01 | 6.50E-01 | 185.62   | not significant |
| 4850 | SNRPA        | -1.04 | 6.80E-02 | 1.09E-01 | 5586.90  | not significant |
| 4851 | AK9          | -1.04 | 6.05E-01 | 6.85E-01 | 108.95   | not significant |
| 4852 | GBF1         | -1.04 | 5.06E-01 | 5.96E-01 | 3431.89  | not significant |
| 4853 | RPRD2        | -1.04 | 2.30E-01 | 3.11E-01 | 2409.98  | not significant |
| 4854 | LYRM4        | -1.04 | 3.20E-01 | 4.11E-01 | 927.16   | not significant |
| 4855 | CHRNA10      | -1.04 | 5.79E-01 | 6.62E-01 | 20.39    | not significant |
| 4856 | KATNA1       | -1.04 | 2.97E-01 | 3.86E-01 | 1020.20  | not significant |
| 4857 | PHKA1        | -1.04 | 6.17E-01 | 6.95E-01 | 39.18    | not significant |
| 4858 | DHX30        | -1.04 | 9.49E-02 | 1.46E-01 | 4924.22  | not significant |
| 4859 | NEK6         | -1.04 | 5.40E-01 | 6.27E-01 | 234.07   | not significant |
| 4860 | BAIAP2       | -1.04 | 5.26E-01 | 6.14E-01 | 287.76   | not significant |
| 4861 | TMEM150A     | -1.04 | 5.27E-01 | 6.15E-01 | 12.01    | not significant |
| 4862 | RARS2        | -1.04 | 3.05E-01 | 3.95E-01 | 1006.27  | not significant |
| 4863 | MCMBP        | -1.04 | 1.10E-01 | 1.65E-01 | 7084.73  | not significant |
| 4864 | TMEM154      | -1.04 | 3.54E-01 | 4.46E-01 | 810.96   | not significant |
| 4865 | ECT2         | -1.04 | 9.72E-02 | 1.49E-01 | 4599.69  | not significant |
| 4866 | UBN1         | -1.04 | 9.20E-02 | 1.42E-01 | 5065.70  | not significant |
| 4867 | MSS51        | -1.04 | 6.27E-01 | 7.03E-01 | 51.66    | not significant |
| 4868 | GCSH         | -1.04 | 6.12E-01 | 6.90E-01 | 97.86    | not significant |
| 4869 | CCDC152      | -1.04 | 2.32E-01 | 3.14E-01 | 2102.60  | not significant |
| 4870 | DCAF5        | -1.04 | 2.09E-01 | 2.87E-01 | 2920.64  | not significant |
| 4871 | KCTD20       | -1.04 | 8.88E-02 | 1.38E-01 | 6363.06  | not significant |
| 4872 | ARFGEF2      | -1.04 | 1.26E-01 | 1.87E-01 | 4183.95  | not significant |
| 4873 | PLP2         | -1.04 | 3.97E-01 | 4.88E-01 | 714.09   | not significant |
| 4874 | RNF187       | -1.04 | 1.22E-01 | 1.82E-01 | 5207.16  | not significant |
| 4875 | R3HDM4       | -1.04 | 2.68E-01 | 3.54E-01 | 1287.83  | not significant |
| 4876 | MLX          | -1.04 | 1.86E-01 | 2.61E-01 | 2666.43  | not significant |
| 4877 | FUT11        | -1.04 | 6.27E-01 | 7.03E-01 | 46.53    | not significant |
| 4878 | MBLAC2       | -1.04 | 4.13E-01 | 5.04E-01 | 574.46   | not significant |
| 4879 | RAVER1       | -1.04 | 1.07E-01 | 1.62E-01 | 9233.09  | not significant |
| 4880 | FAM208A      | -1.04 | 9.38E-02 | 1.44E-01 | 6650.07  | not significant |
| 4881 | RBM23        | -1.04 | 1.66E-01 | 2.36E-01 | 2881.31  | not significant |
| 4882 | C8orf58      | -1.04 | 6.18E-01 | 6.95E-01 | 97.78    | not significant |
| 4883 | FRG1         | -1.04 | 3.56E-01 | 4.48E-01 | 1181.48  | not significant |
| 4884 | FAM212B      | -1.04 | 5.84E-01 | 6.66E-01 | 167.62   | not significant |
| 4885 | INPP5K       | -1.04 | 2.78E-01 | 3.66E-01 | 1560.64  | not significant |
| 4886 | SHB          | -1.04 | 5.49E-01 | 6.35E-01 | 13.49    | not significant |
| 4887 | BTBD7        | -1.04 | 3.51E-01 | 4.43E-01 | 861.52   | not significant |
| 4888 | SLC38A6      | -1.04 | 5.33E-01 | 6.20E-01 | 276.84   | not significant |
| 4889 | FBXO18       | -1.04 | 2.04E-01 | 2.81E-01 | 2249.69  | not significant |
| 4890 | FBXO9        | -1.04 | 1.78E-01 | 2.51E-01 | 2387.26  | not significant |
| 4891 | FAM96A       | -1.04 | 2.27E-01 | 3.09E-01 | 1646.47  | not significant |
| 4892 | NOMO2        | -1.04 | 5.36E-01 | 6.23E-01 | 288.95   | not significant |
| 4893 | GOLGA5       | -1.04 | 3.34E-01 | 4.26E-01 | 892.68   | not significant |
| 4894 | WIPF2        | -1.04 | 2.20E-01 | 3.00E-01 | 1716.60  | not significant |
| 4895 | BST2         | -1.04 | 5.07E-01 | 5.97E-01 | 1809.66  | not significant |
| 4896 | MED1         | -1.04 | 1.18E-01 | 1.76E-01 | 7840.03  | not significant |
| 4897 | HIST1H4A     | -1.04 | 6.31E-01 | 7.08E-01 | 42.51    | not significant |
| 4898 | BCL2L15      | -1.04 | 5.87E-01 | 6.69E-01 | 19.48    | not significant |
| 4899 | ST3GAL2      | -1.04 | 2.32E-01 | 3.14E-01 | 1718.08  | not significant |
| 4900 | PSD4         | -1.04 | 8.74E-02 | 1.36E-01 | 6839.22  | not significant |
| 4901 | NDUFV1       | -1.04 | 8.61E-02 | 1.34E-01 | 5078.89  | not significant |
| 4902 | FAM199X      | -1.04 | 6.13E-01 | 6.91E-01 | 125.95   | not significant |
| 4903 | LYRM5        | -1.04 | 5.05E-01 | 5.94E-01 | 339.27   | not significant |
| 4904 | GSS          | -1.04 | 1.71E-01 | 2.43E-01 | 2781.16  | not significant |
| 4905 | LOC730202    | -1.04 | 5.72E-01 | 6.56E-01 | 17.99    | not significant |
| 4906 | GS1-259H13.2 | -1.04 | 6.30E-01 | 7.06E-01 | 87.01    | not significant |
| 4907 | UCK2         | -1.04 | 1.35E-01 | 1.97E-01 | 5530.63  | not significant |
| 4908 | UTP14A       | -1.04 | 1.99E-01 | 2.75E-01 | 2131.81  | not significant |
| 4909 | GTPBP3       | -1.04 | 3.65E-01 | 4.57E-01 | 1167.70  | not significant |
| 4910 | GZMA         | -1.04 | 5.80E-01 | 6.63E-01 | 188.72   | not significant |
| 4911 | LINC00665    | -1.04 | 5.08E-01 | 5.97E-01 | 342.19   | not significant |
| 4912 | RNF113A      | -1.04 | 3.81E-01 | 4.73E-01 | 824.85   | not significant |
| 4913 | ZNF800       | -1.04 | 2.66E-01 | 3.52E-01 | 1457.02  | not significant |
| 4914 | GTF2I        | -1.04 | 1.64E-01 | 2.34E-01 | 3693.32  | not significant |
| 4915 | SNX3         | -1.04 | 1.29E-01 | 1.91E-01 | 4100.96  | not significant |
| 4916 | AP4E1        | -1.04 | 3.41E-01 | 4.32E-01 | 977.91   | not significant |



|      |              |       |          |          |          |                 |
|------|--------------|-------|----------|----------|----------|-----------------|
| 4917 | SLC25A39     | -1.04 | 1.51E-01 | 2.18E-01 | 3251.46  | not significant |
| 4918 | ARMC4        | -1.04 | 6.34E-01 | 7.10E-01 | 81.30    | not significant |
| 4919 | FAF2         | -1.04 | 1.51E-01 | 2.18E-01 | 2954.32  | not significant |
| 4920 | MPHOSPH8     | -1.04 | 2.35E-01 | 3.17E-01 | 1919.15  | not significant |
| 4921 | LIME1        | -1.04 | 3.31E-01 | 4.22E-01 | 1321.53  | not significant |
| 4922 | ZNF75A       | -1.04 | 4.99E-01 | 5.88E-01 | 400.02   | not significant |
| 4923 | LOC646214    | -1.04 | 6.29E-01 | 7.06E-01 | 31.16    | not significant |
| 4924 | TFCP2        | -1.04 | 1.36E-01 | 1.99E-01 | 4658.99  | not significant |
| 4925 | RPUSD1       | -1.04 | 3.20E-01 | 4.11E-01 | 1372.39  | not significant |
| 4926 | KLHDC3       | -1.04 | 1.28E-01 | 1.88E-01 | 5177.18  | not significant |
| 4927 | FAM208B      | -1.04 | 2.05E-01 | 2.82E-01 | 3776.61  | not significant |
| 4928 | GTPBP10      | -1.04 | 3.13E-01 | 4.04E-01 | 1111.74  | not significant |
| 4929 | MECP2        | -1.04 | 6.29E-01 | 7.06E-01 | 106.33   | not significant |
| 4930 | CD320        | -1.04 | 2.55E-01 | 3.40E-01 | 1944.71  | not significant |
| 4931 | ROCK2        | -1.04 | 2.53E-01 | 3.37E-01 | 1981.05  | not significant |
| 4932 | ZNF22        | -1.04 | 1.08E-01 | 1.63E-01 | 5292.24  | not significant |
| 4933 | CLEC16A      | -1.04 | 1.96E-01 | 2.72E-01 | 2284.69  | not significant |
| 4934 | LOC284009    | -1.04 | 4.73E-01 | 5.64E-01 | 7.33     | not significant |
| 4935 | ATP11A       | -1.04 | 2.62E-01 | 3.47E-01 | 2346.48  | not significant |
| 4936 | GPR3         | -1.04 | 6.45E-01 | 7.19E-01 | 63.19    | not significant |
| 4937 | GABBR1       | -1.04 | 6.46E-01 | 7.20E-01 | 71.32    | not significant |
| 4938 | ZNF720       | -1.04 | 5.10E-01 | 5.99E-01 | 381.89   | not significant |
| 4939 | SLC39A1      | -1.04 | 1.91E-01 | 2.66E-01 | 2932.64  | not significant |
| 4940 | DDX51        | -1.04 | 2.30E-01 | 3.12E-01 | 2267.91  | not significant |
| 4941 | ERCC6L2      | -1.04 | 3.28E-01 | 4.19E-01 | 1157.46  | not significant |
| 4942 | RAB8B        | -1.04 | 1.33E-01 | 1.96E-01 | 4388.82  | not significant |
| 4943 | OXTR         | -1.04 | 6.36E-01 | 7.11E-01 | 116.78   | not significant |
| 4944 | NAA35        | -1.04 | 3.34E-01 | 4.25E-01 | 1037.40  | not significant |
| 4945 | FGL2         | -1.04 | 5.16E-01 | 6.04E-01 | 365.69   | not significant |
| 4946 | EIF3M        | -1.04 | 1.36E-01 | 1.99E-01 | 11526.42 | not significant |
| 4947 | TRIP4        | -1.04 | 5.01E-01 | 5.91E-01 | 508.93   | not significant |
| 4948 | HSPB11       | -1.04 | 2.59E-01 | 3.45E-01 | 1601.60  | not significant |
| 4949 | SPEN         | -1.04 | 2.39E-01 | 3.22E-01 | 7991.68  | not significant |
| 4950 | KIF5B        | -1.04 | 9.28E-02 | 1.43E-01 | 8810.90  | not significant |
| 4951 | PAK2         | -1.04 | 1.09E-01 | 1.64E-01 | 11852.42 | not significant |
| 4952 | LIMS1        | -1.04 | 2.16E-01 | 2.95E-01 | 2654.88  | not significant |
| 4953 | CHAF1A       | -1.04 | 1.18E-01 | 1.75E-01 | 5804.43  | not significant |
| 4954 | GBP1P1       | -1.04 | 6.42E-01 | 7.17E-01 | 34.75    | not significant |
| 4955 | PIBF1        | -1.04 | 4.30E-01 | 5.22E-01 | 730.65   | not significant |
| 4956 | ZNF507       | -1.04 | 2.58E-01 | 3.43E-01 | 1917.01  | not significant |
| 4957 | GRAMD3       | -1.04 | 6.46E-01 | 7.20E-01 | 95.83    | not significant |
| 4958 | KIAA1467     | -1.03 | 5.99E-01 | 6.79E-01 | 180.99   | not significant |
| 4959 | FAM86DP      | -1.03 | 6.03E-01 | 6.83E-01 | 213.20   | not significant |
| 4960 | RING1        | -1.03 | 4.88E-01 | 5.78E-01 | 483.28   | not significant |
| 4961 | TAGLN        | -1.03 | 6.37E-01 | 7.12E-01 | 30.05    | not significant |
| 4962 | FAM86HP      | -1.03 | 6.43E-01 | 7.18E-01 | 33.41    | not significant |
| 4963 | EP300        | -1.03 | 4.77E-01 | 5.68E-01 | 3628.54  | not significant |
| 4964 | COQ7         | -1.03 | 4.55E-01 | 5.47E-01 | 556.93   | not significant |
| 4965 | ZNF546       | -1.03 | 5.99E-01 | 6.79E-01 | 191.57   | not significant |
| 4966 | LOC100506321 | -1.03 | 5.99E-01 | 6.79E-01 | 17.96    | not significant |
| 4967 | PMEL         | -1.03 | 5.28E-01 | 6.16E-01 | 8.93     | not significant |
| 4968 | RPSAP9       | -1.03 | 5.77E-01 | 6.61E-01 | 12.88    | not significant |
| 4969 | COX7C        | -1.03 | 2.11E-01 | 2.90E-01 | 5638.67  | not significant |
| 4970 | RRAGA        | -1.03 | 3.26E-01 | 4.18E-01 | 1262.38  | not significant |
| 4971 | HSPD1        | -1.03 | 1.56E-01 | 2.24E-01 | 27736.70 | not significant |
| 4972 | CRTC2        | -1.03 | 3.35E-01 | 4.26E-01 | 1342.45  | not significant |
| 4973 | RACGAP1P     | -1.03 | 5.69E-01 | 6.53E-01 | 12.35    | not significant |
| 4974 | SMG1P2       | -1.03 | 6.60E-01 | 7.33E-01 | 58.01    | not significant |
| 4975 | ATAD2        | -1.03 | 9.63E-02 | 1.48E-01 | 12999.15 | not significant |
| 4976 | UNC45A       | -1.03 | 2.46E-01 | 3.29E-01 | 2258.45  | not significant |
| 4977 | ATXN7L3      | -1.03 | 1.88E-01 | 2.62E-01 | 3658.28  | not significant |
| 4978 | G6PC3        | -1.03 | 5.81E-01 | 6.63E-01 | 245.86   | not significant |
| 4979 | NPEPPS       | -1.03 | 1.58E-01 | 2.26E-01 | 3711.30  | not significant |
| 4980 | NDUFB5       | -1.03 | 2.50E-01 | 3.34E-01 | 2438.74  | not significant |
| 4981 | MAP10        | -1.03 | 4.67E-01 | 5.58E-01 | 587.18   | not significant |
| 4982 | CDIPT-AS1    | -1.03 | 5.80E-01 | 6.63E-01 | 13.41    | not significant |
| 4983 | IFT81        | -1.03 | 4.93E-01 | 5.83E-01 | 491.05   | not significant |
| 4984 | TAF5         | -1.03 | 4.12E-01 | 5.04E-01 | 958.40   | not significant |
| 4985 | UHRF1        | -1.03 | 1.47E-01 | 2.13E-01 | 9063.93  | not significant |
| 4986 | SMIM7        | -1.03 | 3.71E-01 | 4.63E-01 | 1315.12  | not significant |
| 4987 | HIST1H2AE    | -1.03 | 6.56E-01 | 7.28E-01 | 34.83    | not significant |
| 4988 | LRPAP1       | -1.03 | 2.26E-01 | 3.06E-01 | 2217.06  | not significant |
| 4989 | DNM1L        | -1.03 | 1.86E-01 | 2.60E-01 | 2949.95  | not significant |
| 4990 | HIST1H1E     | -1.03 | 6.64E-01 | 7.36E-01 | 74.79    | not significant |
| 4991 | HVCN1        | -1.03 | 4.56E-01 | 5.47E-01 | 646.89   | not significant |
| 4992 | ZNF665       | -1.03 | 5.81E-01 | 6.64E-01 | 267.11   | not significant |
| 4993 | A1BG-AS1     | -1.03 | 5.92E-01 | 6.73E-01 | 256.82   | not significant |
| 4994 | CCDC102A     | -1.03 | 4.71E-01 | 5.63E-01 | 559.24   | not significant |
| 4995 | ETS2         | -1.03 | 9.87E-02 | 1.51E-01 | 10072.70 | not significant |
| 4996 | NOL3         | -1.03 | 6.67E-01 | 7.38E-01 | 83.64    | not significant |
| 4997 | C16orf70     | -1.03 | 3.74E-01 | 4.66E-01 | 993.00   | not significant |
| 4998 | MMP15        | -1.03 | 6.53E-01 | 7.27E-01 | 31.51    | not significant |
| 4999 | ITLN1        | -1.03 | 5.62E-01 | 6.46E-01 | 11.27    | not significant |
| 5000 | NUDT19       | -1.03 | 5.04E-01 | 5.93E-01 | 501.00   | not significant |
| 5001 | INTS3        | -1.03 | 3.79E-01 | 4.70E-01 | 1076.91  | not significant |
| 5002 | IPP          | -1.03 | 4.47E-01 | 5.39E-01 | 649.49   | not significant |
| 5003 | GLUD1        | -1.03 | 1.22E-01 | 1.82E-01 | 6158.48  | not significant |
| 5004 | TSPAN5       | -1.03 | 2.55E-01 | 3.39E-01 | 2133.78  | not significant |

|      |              |       |          |          |          |                 |
|------|--------------|-------|----------|----------|----------|-----------------|
| 5005 | IL2RG        | -1.03 | 7.84E-02 | 1.23E-01 | 14586.50 | not significant |
| 5006 | PMS2P1       | -1.03 | 3.28E-01 | 4.19E-01 | 1418.37  | not significant |
| 5007 | TMEM126A     | -1.03 | 5.17E-01 | 6.05E-01 | 695.96   | not significant |
| 5008 | SPTSSA       | -1.03 | 3.53E-01 | 4.45E-01 | 1212.21  | not significant |
| 5009 | ICMT         | -1.03 | 1.76E-01 | 2.48E-01 | 7232.44  | not significant |
| 5010 | ANKRD17      | -1.03 | 2.44E-01 | 3.28E-01 | 5845.04  | not significant |
| 5011 | C18orf25     | -1.03 | 3.66E-01 | 4.58E-01 | 1671.93  | not significant |
| 5012 | LOC100133315 | -1.03 | 6.61E-01 | 7.33E-01 | 96.08    | not significant |
| 5013 | NOL12        | -1.03 | 3.93E-01 | 4.85E-01 | 1178.84  | not significant |
| 5014 | DNAH10       | -1.03 | 6.62E-01 | 7.34E-01 | 38.72    | not significant |
| 5015 | OTX1         | -1.03 | 6.34E-01 | 7.10E-01 | 153.42   | not significant |
| 5016 | PECR         | -1.03 | 6.53E-01 | 7.27E-01 | 113.96   | not significant |
| 5017 | N4BP2L2-IT2  | -1.03 | 6.69E-01 | 7.39E-01 | 89.92    | not significant |
| 5018 | VPS41        | -1.03 | 2.52E-01 | 3.37E-01 | 2224.52  | not significant |
| 5019 | GSTM2        | -1.03 | 6.66E-01 | 7.37E-01 | 83.00    | not significant |
| 5020 | NPEPL1       | -1.03 | 5.56E-01 | 6.41E-01 | 9.95     | not significant |
| 5021 | METTTL23     | -1.03 | 3.57E-01 | 4.49E-01 | 1189.90  | not significant |
| 5022 | EGR2         | -1.03 | 5.53E-01 | 6.39E-01 | 10.10    | not significant |
| 5023 | CYP4F11      | -1.03 | 5.53E-01 | 6.38E-01 | 9.32     | not significant |
| 5024 | LZIC         | -1.03 | 3.96E-01 | 4.88E-01 | 1056.40  | not significant |
| 5025 | KMT2A        | -1.03 | 4.79E-01 | 5.70E-01 | 774.05   | not significant |
| 5026 | TMEM8A       | -1.03 | 3.28E-01 | 4.19E-01 | 1833.67  | not significant |
| 5027 | CCT3         | -1.03 | 1.75E-01 | 2.48E-01 | 18388.93 | not significant |
| 5028 | NAGLU        | -1.03 | 5.94E-01 | 6.74E-01 | 249.63   | not significant |
| 5029 | MATR3        | -1.03 | 1.06E-01 | 1.60E-01 | 27414.02 | not significant |
| 5030 | CXorf38      | -1.03 | 3.06E-01 | 3.95E-01 | 1545.73  | not significant |
| 5031 | MCAM         | -1.03 | 6.68E-01 | 7.39E-01 | 38.33    | not significant |
| 5032 | LINC00944    | -1.03 | 6.32E-01 | 7.08E-01 | 164.78   | not significant |
| 5033 | PHKB         | -1.03 | 2.22E-01 | 3.02E-01 | 3069.87  | not significant |
| 5034 | GFM2         | -1.03 | 3.33E-01 | 4.24E-01 | 1741.72  | not significant |
| 5035 | FOXJ3        | -1.03 | 1.79E-01 | 2.52E-01 | 3690.82  | not significant |
| 5036 | BCL7B        | -1.03 | 4.39E-01 | 5.31E-01 | 741.62   | not significant |
| 5037 | WDFY1        | -1.03 | 2.92E-01 | 3.81E-01 | 1631.19  | not significant |
| 5038 | GOLGA4       | -1.03 | 2.40E-01 | 3.23E-01 | 3355.69  | not significant |
| 5039 | DDX20        | -1.03 | 3.23E-01 | 4.14E-01 | 1484.43  | not significant |
| 5040 | MCFD2        | -1.03 | 1.95E-01 | 2.71E-01 | 4261.52  | not significant |
| 5041 | ENPP3        | -1.03 | 6.54E-01 | 7.27E-01 | 26.36    | not significant |
| 5042 | KIFC1        | -1.03 | 2.68E-01 | 3.54E-01 | 2013.26  | not significant |
| 5043 | NDUFAF6      | -1.03 | 4.81E-01 | 5.72E-01 | 607.35   | not significant |
| 5044 | FAM13A       | -1.03 | 6.69E-01 | 7.39E-01 | 40.22    | not significant |
| 5045 | DUSP12       | -1.03 | 4.54E-01 | 5.46E-01 | 708.25   | not significant |
| 5046 | RHBDL1       | -1.03 | 6.48E-01 | 7.22E-01 | 182.44   | not significant |
| 5047 | KIF13B       | -1.03 | 2.72E-01 | 3.59E-01 | 1962.25  | not significant |
| 5048 | C5orf51      | -1.03 | 2.95E-01 | 3.84E-01 | 1985.76  | not significant |
| 5049 | TMEM68       | -1.03 | 3.67E-01 | 4.58E-01 | 1141.49  | not significant |
| 5050 | CDKAL1       | -1.03 | 4.10E-01 | 5.02E-01 | 1051.67  | not significant |
| 5051 | LINC01366    | -1.03 | 5.82E-01 | 6.65E-01 | 282.74   | not significant |
| 5052 | ZNF200       | -1.03 | 4.03E-01 | 4.95E-01 | 973.79   | not significant |
| 5053 | CIRBP-AS1    | -1.03 | 5.43E-01 | 6.29E-01 | 8.27     | not significant |
| 5054 | MID1IP1-AS1  | -1.03 | 5.79E-01 | 6.62E-01 | 11.82    | not significant |
| 5055 | KDM5C        | -1.03 | 3.23E-01 | 4.15E-01 | 1588.78  | not significant |
| 5056 | CTDSPL       | -1.03 | 3.97E-01 | 4.89E-01 | 963.42   | not significant |
| 5057 | TEFM         | -1.03 | 6.16E-01 | 6.94E-01 | 231.25   | not significant |
| 5058 | NUP50        | -1.03 | 1.23E-01 | 1.83E-01 | 8900.09  | not significant |
| 5059 | SEC23B       | -1.03 | 2.18E-01 | 2.98E-01 | 3047.22  | not significant |
| 5060 | SMIM20       | -1.03 | 5.03E-01 | 5.93E-01 | 617.02   | not significant |
| 5061 | FHOD1        | -1.03 | 3.14E-01 | 4.04E-01 | 1572.02  | not significant |
| 5062 | PCDH9        | -1.03 | 6.81E-01 | 7.50E-01 | 54.13    | not significant |
| 5063 | DNAJC3       | -1.03 | 2.64E-01 | 3.49E-01 | 2217.37  | not significant |
| 5064 | ABLIM2       | -1.03 | 5.88E-01 | 6.69E-01 | 11.44    | not significant |
| 5065 | DMTN         | -1.03 | 6.63E-01 | 7.35E-01 | 31.38    | not significant |
| 5066 | HIST1H2BM    | -1.03 | 6.36E-01 | 7.11E-01 | 19.48    | not significant |
| 5067 | COA3         | -1.03 | 5.04E-01 | 5.94E-01 | 525.03   | not significant |
| 5068 | KCNAB3       | -1.03 | 6.09E-01 | 6.88E-01 | 263.98   | not significant |
| 5069 | UQCC2        | -1.03 | 4.18E-01 | 5.10E-01 | 976.97   | not significant |
| 5070 | ZSCAN20      | -1.03 | 6.60E-01 | 7.33E-01 | 135.52   | not significant |
| 5071 | DIAPH2       | -1.03 | 4.66E-01 | 5.58E-01 | 803.32   | not significant |
| 5072 | DPP4         | -1.03 | 1.26E-01 | 1.86E-01 | 6513.08  | not significant |
| 5073 | 43531_3536   | -1.03 | 1.38E-01 | 2.02E-01 | 5424.44  | not significant |
| 5074 | ORC2         | -1.03 | 2.95E-01 | 3.84E-01 | 2098.29  | not significant |
| 5075 | GLTP         | -1.03 | 3.68E-01 | 4.60E-01 | 1613.14  | not significant |
| 5076 | SKI          | -1.03 | 5.40E-01 | 6.27E-01 | 423.51   | not significant |
| 5077 | PTGES2       | -1.03 | 4.56E-01 | 5.48E-01 | 887.49   | not significant |
| 5078 | ANKRD36BP2   | -1.03 | 6.65E-01 | 7.37E-01 | 25.66    | not significant |
| 5079 | LURAP1       | -1.03 | 6.26E-01 | 7.03E-01 | 15.32    | not significant |
| 5080 | ZDHHC7       | -1.03 | 3.05E-01 | 3.95E-01 | 1945.43  | not significant |
| 5081 | DDX3X        | -1.03 | 1.67E-01 | 2.38E-01 | 14882.91 | not significant |
| 5082 | TUBGCP5      | -1.03 | 5.03E-01 | 5.93E-01 | 708.70   | not significant |
| 5083 | RFWD2        | -1.03 | 3.36E-01 | 4.27E-01 | 1791.20  | not significant |
| 5084 | SLC35F2      | -1.03 | 4.05E-01 | 4.97E-01 | 1029.19  | not significant |
| 5085 | TAF1A-AS1    | -1.03 | 6.30E-01 | 7.06E-01 | 16.20    | not significant |
| 5086 | SNX20        | -1.03 | 6.41E-01 | 7.16E-01 | 205.28   | not significant |
| 5087 | ZSCAN21      | -1.03 | 6.21E-01 | 6.98E-01 | 255.76   | not significant |
| 5088 | DNAJC13      | -1.03 | 2.48E-01 | 3.32E-01 | 3242.60  | not significant |
| 5089 | PTPN1        | -1.03 | 1.97E-01 | 2.73E-01 | 4385.87  | not significant |
| 5090 | GK5          | -1.03 | 3.53E-01 | 4.45E-01 | 1432.49  | not significant |
| 5091 | MTA1         | -1.03 | 2.55E-01 | 3.40E-01 | 2568.32  | not significant |
| 5092 | NADK2        | -1.03 | 3.85E-01 | 4.77E-01 | 1604.83  | not significant |

|      |              |       |          |          |          |                 |
|------|--------------|-------|----------|----------|----------|-----------------|
| 5093 | KIF22        | -1.03 | 1.54E-01 | 2.21E-01 | 7320.75  | not significant |
| 5094 | IQCD         | -1.03 | 6.58E-01 | 7.31E-01 | 20.51    | not significant |
| 5095 | MRPS16       | -1.03 | 1.99E-01 | 2.75E-01 | 4264.14  | not significant |
| 5096 | EZR-AS1      | -1.03 | 5.52E-01 | 6.38E-01 | 8.46     | not significant |
| 5097 | TMEM63C      | -1.03 | 5.44E-01 | 6.30E-01 | 8.66     | not significant |
| 5098 | NEIL3        | -1.03 | 2.55E-01 | 3.39E-01 | 2959.77  | not significant |
| 5099 | ZNF808       | -1.03 | 5.94E-01 | 6.75E-01 | 462.30   | not significant |
| 5100 | TNPO2        | -1.03 | 2.49E-01 | 3.33E-01 | 6824.89  | not significant |
| 5101 | VKORC1       | -1.03 | 3.72E-01 | 4.64E-01 | 1531.81  | not significant |
| 5102 | EBPL         | -1.03 | 4.83E-01 | 5.73E-01 | 1175.67  | not significant |
| 5103 | YTHDC1       | -1.03 | 3.93E-01 | 4.85E-01 | 1161.16  | not significant |
| 5104 | SQLE         | -1.03 | 2.39E-01 | 3.22E-01 | 5111.99  | not significant |
| 5105 | C2orf81      | -1.03 | 6.93E-01 | 7.60E-01 | 53.60    | not significant |
| 5106 | RACGAP1      | -1.03 | 1.84E-01 | 2.58E-01 | 7750.52  | not significant |
| 5107 | ENTPD6       | -1.03 | 3.08E-01 | 3.97E-01 | 1986.23  | not significant |
| 5108 | BSN          | -1.03 | 6.89E-01 | 7.57E-01 | 38.39    | not significant |
| 5109 | TBC1D20      | -1.03 | 2.68E-01 | 3.54E-01 | 2364.28  | not significant |
| 5110 | PANK3        | -1.03 | 3.30E-01 | 4.21E-01 | 2374.61  | not significant |
| 5111 | LIPC         | -1.03 | 6.97E-01 | 7.62E-01 | 65.72    | not significant |
| 5112 | DNAJC7       | -1.03 | 3.56E-01 | 4.47E-01 | 1941.17  | not significant |
| 5113 | PFKFB2       | -1.03 | 6.31E-01 | 7.08E-01 | 242.53   | not significant |
| 5114 | CALHM2       | -1.03 | 5.16E-01 | 6.05E-01 | 579.00   | not significant |
| 5115 | HSPA2        | -1.03 | 6.98E-01 | 7.63E-01 | 49.59    | not significant |
| 5116 | SREBF2       | -1.03 | 1.54E-01 | 2.21E-01 | 12272.23 | not significant |
| 5117 | TBC1D9       | -1.03 | 5.80E-01 | 6.63E-01 | 374.44   | not significant |
| 5118 | MKLN1        | -1.03 | 3.09E-01 | 3.99E-01 | 2766.54  | not significant |
| 5119 | DOT1L        | -1.03 | 2.44E-01 | 3.27E-01 | 5001.39  | not significant |
| 5120 | GMPPB        | -1.03 | 4.86E-01 | 5.77E-01 | 696.31   | not significant |
| 5121 | SAV1         | -1.03 | 5.08E-01 | 5.97E-01 | 609.61   | not significant |
| 5122 | C5orf28      | -1.03 | 5.66E-01 | 6.50E-01 | 425.81   | not significant |
| 5123 | FHIT         | -1.03 | 5.09E-01 | 5.98E-01 | 655.44   | not significant |
| 5124 | CYP4F35P     | -1.03 | 6.32E-01 | 7.08E-01 | 13.71    | not significant |
| 5125 | UBR7         | -1.03 | 1.78E-01 | 2.51E-01 | 7039.96  | not significant |
| 5126 | BPNT1        | -1.03 | 4.04E-01 | 4.95E-01 | 1128.88  | not significant |
| 5127 | CSNK1D       | -1.03 | 1.81E-01 | 2.54E-01 | 6582.27  | not significant |
| 5128 | MKS1         | -1.03 | 4.76E-01 | 5.67E-01 | 834.91   | not significant |
| 5129 | ORC6         | -1.03 | 3.16E-01 | 4.07E-01 | 1894.79  | not significant |
| 5130 | CACTIN       | -1.03 | 3.46E-01 | 4.38E-01 | 1659.83  | not significant |
| 5131 | FAM188A      | -1.03 | 5.34E-01 | 6.21E-01 | 547.84   | not significant |
| 5132 | LOC100507462 | -1.03 | 7.01E-01 | 7.66E-01 | 45.31    | not significant |
| 5133 | NUP160       | -1.03 | 2.08E-01 | 2.86E-01 | 6245.15  | not significant |
| 5134 | TNFRSF21     | -1.03 | 4.29E-01 | 5.21E-01 | 1142.36  | not significant |
| 5135 | SCAF4        | -1.03 | 2.85E-01 | 3.73E-01 | 4511.88  | not significant |
| 5136 | HIST1H4F     | -1.03 | 4.01E-01 | 4.93E-01 | 11.66    | not significant |
| 5137 | OTUB2        | -1.03 | 6.95E-01 | 7.61E-01 | 97.02    | not significant |
| 5138 | ADO          | -1.03 | 3.75E-01 | 4.67E-01 | 1380.12  | not significant |
| 5139 | DCLRE1C      | -1.03 | 3.82E-01 | 4.74E-01 | 1365.78  | not significant |
| 5140 | ZBTB2        | -1.03 | 3.42E-01 | 4.34E-01 | 1688.55  | not significant |
| 5141 | PRNP         | -1.03 | 6.06E-01 | 6.85E-01 | 334.73   | not significant |
| 5142 | OCEL1        | -1.03 | 6.98E-01 | 7.63E-01 | 106.92   | not significant |
| 5143 | MSMO1        | -1.03 | 3.56E-01 | 4.48E-01 | 1881.03  | not significant |
| 5144 | C11orf65     | -1.03 | 6.47E-01 | 7.21E-01 | 15.09    | not significant |
| 5145 | ZNF252P      | -1.03 | 4.40E-01 | 5.32E-01 | 1056.25  | not significant |
| 5146 | CALM2        | -1.03 | 2.38E-01 | 3.20E-01 | 19656.37 | not significant |
| 5147 | SIRT7        | -1.03 | 5.12E-01 | 6.01E-01 | 824.31   | not significant |
| 5148 | THAP11       | -1.03 | 3.92E-01 | 4.84E-01 | 1996.74  | not significant |
| 5149 | KIF4B        | -1.03 | 6.56E-01 | 7.29E-01 | 16.81    | not significant |
| 5150 | TARBP1       | -1.03 | 3.24E-01 | 4.15E-01 | 2492.65  | not significant |
| 5151 | NCOR1        | -1.03 | 1.86E-01 | 2.60E-01 | 9300.03  | not significant |
| 5152 | ZNF761       | -1.03 | 3.95E-01 | 4.87E-01 | 1389.24  | not significant |
| 5153 | TERF2        | -1.03 | 3.03E-01 | 3.92E-01 | 2144.83  | not significant |
| 5154 | ORAI1        | -1.03 | 7.04E-01 | 7.69E-01 | 80.13    | not significant |
| 5155 | LOC100507195 | -1.03 | 6.01E-01 | 6.81E-01 | 9.43     | not significant |
| 5156 | DYNC112      | -1.03 | 3.24E-01 | 4.15E-01 | 2039.47  | not significant |
| 5157 | MCM3AP       | -1.03 | 2.62E-01 | 3.48E-01 | 3042.98  | not significant |
| 5158 | HIP1R        | -1.03 | 2.97E-01 | 3.86E-01 | 3819.73  | not significant |
| 5159 | C11orf71     | -1.03 | 6.80E-01 | 7.49E-01 | 146.07   | not significant |
| 5160 | GIGYF2       | -1.03 | 2.66E-01 | 3.52E-01 | 3380.95  | not significant |
| 5161 | BTN2A2       | -1.03 | 5.66E-01 | 6.50E-01 | 460.07   | not significant |
| 5162 | SLC39A9      | -1.03 | 2.03E-01 | 2.81E-01 | 4110.73  | not significant |
| 5163 | PRPF6        | -1.03 | 2.64E-01 | 3.50E-01 | 3526.16  | not significant |
| 5164 | PAIP2B       | -1.03 | 7.09E-01 | 7.72E-01 | 51.54    | not significant |
| 5165 | PA2G4P4      | -1.03 | 6.94E-01 | 7.61E-01 | 118.28   | not significant |
| 5166 | OMG          | -1.03 | 6.35E-01 | 7.11E-01 | 12.69    | not significant |
| 5167 | DCLRE1B      | -1.03 | 4.26E-01 | 5.18E-01 | 1422.54  | not significant |
| 5168 | ALG13        | -1.03 | 4.69E-01 | 5.61E-01 | 1126.15  | not significant |
| 5169 | RCOR1        | -1.03 | 3.15E-01 | 4.06E-01 | 2863.87  | not significant |
| 5170 | SLC5A6       | -1.03 | 3.15E-01 | 4.06E-01 | 2497.48  | not significant |
| 5171 | KIAA1211L    | -1.03 | 6.93E-01 | 7.60E-01 | 26.53    | not significant |
| 5172 | SAMD9L       | -1.03 | 4.96E-01 | 5.86E-01 | 923.22   | not significant |
| 5173 | CEP78        | -1.03 | 3.43E-01 | 4.34E-01 | 1850.41  | not significant |
| 5174 | NCAPG        | -1.03 | 2.44E-01 | 3.28E-01 | 4829.22  | not significant |
| 5175 | GSN          | -1.03 | 6.15E-01 | 6.93E-01 | 10.97    | not significant |
| 5176 | ZNF815P      | -1.03 | 7.04E-01 | 7.69E-01 | 33.37    | not significant |
| 5177 | FBXO45       | -1.03 | 3.25E-01 | 4.16E-01 | 2415.67  | not significant |
| 5178 | TSR3         | -1.03 | 4.32E-01 | 5.24E-01 | 1306.71  | not significant |
| 5179 | GCC1         | -1.03 | 4.55E-01 | 5.47E-01 | 1005.18  | not significant |
| 5180 | LCOR         | -1.03 | 4.78E-01 | 5.69E-01 | 918.47   | not significant |

|      |           |       |          |          |          |                 |
|------|-----------|-------|----------|----------|----------|-----------------|
| 5181 | SOBP      | -1.03 | 4.88E-01 | 5.78E-01 | 895.40   | not significant |
| 5182 | SLC35A4   | -1.03 | 2.94E-01 | 3.83E-01 | 3999.26  | not significant |
| 5183 | VPS26A    | -1.03 | 3.70E-01 | 4.62E-01 | 2139.38  | not significant |
| 5184 | GRPEL2    | -1.03 | 5.72E-01 | 6.56E-01 | 476.19   | not significant |
| 5185 | EXOC6B    | -1.03 | 6.22E-01 | 6.99E-01 | 324.09   | not significant |
| 5186 | ANLN      | -1.03 | 2.55E-01 | 3.40E-01 | 3938.73  | not significant |
| 5187 | WDHD1     | -1.03 | 2.34E-01 | 3.16E-01 | 4426.85  | not significant |
| 5188 | EMC2      | -1.03 | 5.58E-01 | 6.43E-01 | 551.43   | not significant |
| 5189 | CLCN5     | -1.03 | 7.05E-01 | 7.69E-01 | 33.51    | not significant |
| 5190 | KANSL3    | -1.03 | 1.98E-01 | 2.75E-01 | 5967.23  | not significant |
| 5191 | ARFIP2    | -1.03 | 3.66E-01 | 4.58E-01 | 1646.24  | not significant |
| 5192 | SNX25     | -1.03 | 4.97E-01 | 5.87E-01 | 806.66   | not significant |
| 5193 | RCC1      | -1.03 | 2.46E-01 | 3.29E-01 | 5972.50  | not significant |
| 5194 | LINC01337 | -1.03 | 6.40E-01 | 7.16E-01 | 11.94    | not significant |
| 5195 | RBM4B     | -1.03 | 6.33E-01 | 7.09E-01 | 355.62   | not significant |
| 5196 | TMEM182   | -1.03 | 6.93E-01 | 7.60E-01 | 151.48   | not significant |
| 5197 | OGG1      | -1.03 | 6.20E-01 | 6.97E-01 | 346.97   | not significant |
| 5198 | STXBP1    | -1.03 | 5.75E-01 | 6.58E-01 | 483.87   | not significant |
| 5199 | SCML1     | -1.03 | 6.13E-01 | 6.91E-01 | 358.70   | not significant |
| 5200 | UBTF      | -1.03 | 1.82E-01 | 2.56E-01 | 10117.56 | not significant |
| 5201 | CLPX      | -1.03 | 4.41E-01 | 5.34E-01 | 1386.58  | not significant |
| 5202 | P2RX1     | -1.03 | 6.97E-01 | 7.63E-01 | 139.81   | not significant |
| 5203 | ARAF      | -1.03 | 3.46E-01 | 4.37E-01 | 1917.76  | not significant |
| 5204 | NUCB2     | -1.03 | 3.12E-01 | 4.02E-01 | 22033.90 | not significant |
| 5205 | KCTD18    | -1.03 | 4.97E-01 | 5.87E-01 | 835.15   | not significant |
| 5206 | SUPT5H    | -1.03 | 2.14E-01 | 2.93E-01 | 4681.57  | not significant |
| 5207 | PUS3      | -1.03 | 5.70E-01 | 6.54E-01 | 519.03   | not significant |
| 5208 | FUK       | -1.03 | 6.13E-01 | 6.91E-01 | 399.63   | not significant |
| 5209 | UBE2F     | -1.03 | 4.85E-01 | 5.75E-01 | 869.69   | not significant |
| 5210 | SPOCK2    | -1.03 | 7.15E-01 | 7.78E-01 | 102.55   | not significant |
| 5211 | SLC9B1    | -1.03 | 7.16E-01 | 7.79E-01 | 42.19    | not significant |
| 5212 | DAZAP2    | -1.03 | 2.39E-01 | 3.21E-01 | 12382.68 | not significant |
| 5213 | KCNQ4     | -1.03 | 6.72E-01 | 7.42E-01 | 17.36    | not significant |
| 5214 | MAPK1     | -1.03 | 1.98E-01 | 2.74E-01 | 10348.67 | not significant |
| 5215 | COQ4      | -1.03 | 5.69E-01 | 6.53E-01 | 584.28   | not significant |
| 5216 | PRR3      | -1.03 | 6.55E-01 | 7.28E-01 | 246.27   | not significant |
| 5217 | ACIN1     | -1.03 | 1.91E-01 | 2.66E-01 | 10696.57 | not significant |
| 5218 | CORO7     | -1.03 | 5.79E-01 | 6.62E-01 | 486.09   | not significant |
| 5219 | YTHDF1    | -1.03 | 3.07E-01 | 3.96E-01 | 2545.86  | not significant |
| 5220 | NBPF8     | -1.03 | 7.00E-01 | 7.65E-01 | 22.10    | not significant |
| 5221 | MLST8     | -1.03 | 3.69E-01 | 4.61E-01 | 1943.34  | not significant |
| 5222 | ERIC5     | -1.03 | 6.93E-01 | 7.60E-01 | 22.84    | not significant |
| 5223 | TYW1B     | -1.03 | 7.29E-01 | 7.89E-01 | 60.32    | not significant |
| 5224 | CHTOP     | -1.03 | 2.78E-01 | 3.65E-01 | 3493.80  | not significant |
| 5225 | LINC00471 | -1.03 | 6.76E-01 | 7.45E-01 | 16.16    | not significant |
| 5226 | HIST1H2AL | -1.03 | 6.79E-01 | 7.48E-01 | 17.26    | not significant |
| 5227 | ABCA2     | -1.03 | 7.27E-01 | 7.88E-01 | 42.17    | not significant |
| 5228 | EIF2AK1   | -1.03 | 1.46E-01 | 2.11E-01 | 11362.80 | not significant |
| 5229 | ZNF69     | -1.03 | 7.09E-01 | 7.73E-01 | 137.56   | not significant |
| 5230 | LRRC40    | -1.03 | 4.06E-01 | 4.98E-01 | 1834.11  | not significant |
| 5231 | ZC3HAV1L  | -1.03 | 5.64E-01 | 6.49E-01 | 831.34   | not significant |
| 5232 | SOS1      | -1.03 | 3.73E-01 | 4.65E-01 | 2381.61  | not significant |
| 5233 | DNAJC5    | -1.03 | 3.44E-01 | 4.35E-01 | 3512.31  | not significant |
| 5234 | PSAP      | -1.03 | 2.61E-01 | 3.46E-01 | 30553.03 | not significant |
| 5235 | CCDC90B   | -1.03 | 4.63E-01 | 5.55E-01 | 1295.63  | not significant |
| 5236 | GPX7      | -1.03 | 4.34E-01 | 5.26E-01 | 1266.52  | not significant |
| 5237 | URGCP     | -1.03 | 4.69E-01 | 5.60E-01 | 1259.00  | not significant |
| 5238 | FGFRL1    | -1.03 | 5.74E-01 | 6.57E-01 | 549.15   | not significant |
| 5239 | WDR82     | -1.03 | 2.16E-01 | 2.95E-01 | 11309.60 | not significant |
| 5240 | SYNGR1    | -1.03 | 6.28E-01 | 7.04E-01 | 10.47    | not significant |
| 5241 | POF1B     | -1.03 | 5.45E-01 | 6.31E-01 | 769.10   | not significant |
| 5242 | MGAT1     | -1.03 | 3.37E-01 | 4.28E-01 | 3904.46  | not significant |
| 5243 | CREB3L2   | -1.03 | 3.37E-01 | 4.29E-01 | 2627.75  | not significant |
| 5244 | CELF1     | -1.03 | 2.56E-01 | 3.41E-01 | 6059.15  | not significant |
| 5245 | FAM222B   | -1.03 | 5.44E-01 | 6.31E-01 | 743.37   | not significant |
| 5246 | COA6      | -1.03 | 5.60E-01 | 6.44E-01 | 859.00   | not significant |
| 5247 | GMFG      | -1.03 | 3.33E-01 | 4.24E-01 | 3862.83  | not significant |
| 5248 | CCND3     | -1.03 | 2.15E-01 | 2.95E-01 | 31289.14 | not significant |
| 5249 | GTF3C1    | -1.03 | 3.91E-01 | 4.83E-01 | 4497.07  | not significant |
| 5250 | CCNY      | -1.03 | 2.58E-01 | 3.43E-01 | 5017.47  | not significant |
| 5251 | ZMYND10   | -1.03 | 6.98E-01 | 7.63E-01 | 17.83    | not significant |
| 5252 | SEC61A1   | -1.03 | 2.19E-01 | 2.99E-01 | 10176.45 | not significant |
| 5253 | NEO1      | -1.03 | 6.50E-01 | 7.24E-01 | 11.18    | not significant |
| 5254 | RASGRF1   | -1.03 | 6.36E-01 | 7.11E-01 | 10.07    | not significant |
| 5255 | RAB11FIP1 | -1.03 | 2.38E-01 | 3.21E-01 | 10761.97 | not significant |
| 5256 | UBR1      | -1.03 | 4.66E-01 | 5.58E-01 | 1559.06  | not significant |
| 5257 | SMURF2    | -1.03 | 5.45E-01 | 6.31E-01 | 765.42   | not significant |
| 5258 | STOX1     | -1.03 | 6.84E-01 | 7.52E-01 | 233.35   | not significant |
| 5259 | NIPBL     | -1.03 | 3.24E-01 | 4.16E-01 | 6402.85  | not significant |
| 5260 | RDH5      | -1.03 | 7.33E-01 | 7.93E-01 | 32.19    | not significant |
| 5261 | LSM12     | -1.03 | 6.83E-01 | 7.51E-01 | 229.99   | not significant |
| 5262 | ZNF526    | -1.03 | 6.17E-01 | 6.94E-01 | 463.37   | not significant |
| 5263 | SNIP1     | -1.03 | 5.18E-01 | 6.06E-01 | 875.46   | not significant |
| 5264 | DDR1      | -1.03 | 7.41E-01 | 7.99E-01 | 71.11    | not significant |
| 5265 | RTFDC1    | -1.03 | 3.69E-01 | 4.61E-01 | 3174.67  | not significant |
| 5266 | C4orf48   | -1.03 | 6.25E-01 | 7.02E-01 | 415.39   | not significant |
| 5267 | RNF40     | -1.03 | 2.73E-01 | 3.60E-01 | 5435.58  | not significant |
| 5268 | ATP13A3   | -1.03 | 2.48E-01 | 3.32E-01 | 9555.85  | not significant |

|      |              |       |          |          |          |                 |
|------|--------------|-------|----------|----------|----------|-----------------|
| 5269 | NDUFAF3      | -1.03 | 4.87E-01 | 5.77E-01 | 1311.54  | not significant |
| 5270 | HERC1        | -1.03 | 4.28E-01 | 5.20E-01 | 2458.19  | not significant |
| 5271 | BDNF-AS      | -1.03 | 7.22E-01 | 7.84E-01 | 23.67    | not significant |
| 5272 | DUSP10       | -1.03 | 7.44E-01 | 8.01E-01 | 52.74    | not significant |
| 5273 | SC5D         | -1.02 | 4.12E-01 | 5.03E-01 | 1693.44  | not significant |
| 5274 | TRAPPC13     | -1.02 | 4.87E-01 | 5.77E-01 | 1168.06  | not significant |
| 5275 | ARRB2        | -1.02 | 2.80E-01 | 3.68E-01 | 4286.95  | not significant |
| 5276 | DLGAP1-AS2   | -1.02 | 6.63E-01 | 7.35E-01 | 10.55    | not significant |
| 5277 | UBE2H        | -1.02 | 4.26E-01 | 5.18E-01 | 2154.63  | not significant |
| 5278 | UBE3B        | -1.02 | 4.24E-01 | 5.16E-01 | 1735.31  | not significant |
| 5279 | HIST1H4H     | -1.02 | 7.40E-01 | 7.98E-01 | 47.54    | not significant |
| 5280 | TBL1XR1      | -1.02 | 2.91E-01 | 3.80E-01 | 6910.08  | not significant |
| 5281 | CNR2         | -1.02 | 7.40E-01 | 7.98E-01 | 87.85    | not significant |
| 5282 | CPNE5        | -1.02 | 7.40E-01 | 7.98E-01 | 100.08   | not significant |
| 5283 | ZMYM4        | -1.02 | 3.16E-01 | 4.06E-01 | 4305.34  | not significant |
| 5284 | ECE2         | -1.02 | 6.84E-01 | 7.52E-01 | 312.69   | not significant |
| 5285 | RBM39        | -1.02 | 1.96E-01 | 2.72E-01 | 14130.63 | not significant |
| 5286 | MAP2K7       | -1.02 | 3.69E-01 | 4.61E-01 | 2245.35  | not significant |
| 5287 | LOC100506469 | -1.02 | 7.17E-01 | 7.80E-01 | 183.46   | not significant |
| 5288 | TSPAN10      | -1.02 | 6.40E-01 | 7.16E-01 | 9.76     | not significant |
| 5289 | BIRC6        | -1.02 | 3.81E-01 | 4.73E-01 | 5017.87  | not significant |
| 5290 | ADNP2        | -1.02 | 3.36E-01 | 4.27E-01 | 2811.84  | not significant |
| 5291 | HIST1H2BJ    | -1.02 | 7.27E-01 | 7.88E-01 | 26.34    | not significant |
| 5292 | VWA8         | -1.02 | 5.16E-01 | 6.05E-01 | 1173.81  | not significant |
| 5293 | RPS14P3      | -1.02 | 7.39E-01 | 7.98E-01 | 127.14   | not significant |
| 5294 | BBIP1        | -1.02 | 6.47E-01 | 7.22E-01 | 409.04   | not significant |
| 5295 | SENP8        | -1.02 | 7.52E-01 | 8.08E-01 | 62.86    | not significant |
| 5296 | ALKBH5       | -1.02 | 3.90E-01 | 4.83E-01 | 4521.86  | not significant |
| 5297 | ASNA1        | -1.02 | 4.27E-01 | 5.20E-01 | 2149.94  | not significant |
| 5298 | ZBTB39       | -1.02 | 4.60E-01 | 5.51E-01 | 1397.55  | not significant |
| 5299 | ZNF391       | -1.02 | 7.23E-01 | 7.85E-01 | 158.39   | not significant |
| 5300 | SUSD4        | -1.02 | 6.69E-01 | 7.39E-01 | 313.44   | not significant |
| 5301 | AKAP10       | -1.02 | 5.10E-01 | 5.99E-01 | 990.88   | not significant |
| 5302 | INTS7        | -1.02 | 3.52E-01 | 4.44E-01 | 2704.63  | not significant |
| 5303 | GNN          | -1.02 | 7.06E-01 | 7.71E-01 | 15.67    | not significant |
| 5304 | ZBED8        | -1.02 | 7.50E-01 | 8.06E-01 | 100.04   | not significant |
| 5305 | AKR7A2       | -1.02 | 4.31E-01 | 5.23E-01 | 2061.96  | not significant |
| 5306 | MAEA         | -1.02 | 3.72E-01 | 4.64E-01 | 2629.50  | not significant |
| 5307 | VAV1         | -1.02 | 2.74E-01 | 3.61E-01 | 5259.72  | not significant |
| 5308 | CCDC132      | -1.02 | 5.32E-01 | 6.20E-01 | 912.83   | not significant |
| 5309 | RNF138       | -1.02 | 3.40E-01 | 4.31E-01 | 4336.05  | not significant |
| 5310 | KLHL36       | -1.02 | 7.04E-01 | 7.69E-01 | 241.54   | not significant |
| 5311 | DEF6         | -1.02 | 3.29E-01 | 4.20E-01 | 4005.23  | not significant |
| 5312 | SMARCE1      | -1.02 | 2.37E-01 | 3.19E-01 | 10458.52 | not significant |
| 5313 | PTS          | -1.02 | 6.06E-01 | 6.85E-01 | 549.43   | not significant |
| 5314 | VTI1A        | -1.02 | 5.01E-01 | 5.91E-01 | 1125.63  | not significant |
| 5315 | TEX14        | -1.02 | 7.08E-01 | 7.72E-01 | 17.74    | not significant |
| 5316 | CFP          | -1.02 | 6.92E-01 | 7.59E-01 | 12.64    | not significant |
| 5317 | LOC101930452 | -1.02 | 7.30E-01 | 7.90E-01 | 21.38    | not significant |
| 5318 | UCP3         | -1.02 | 7.56E-01 | 8.11E-01 | 94.42    | not significant |
| 5319 | UXS1         | -1.02 | 4.53E-01 | 5.45E-01 | 1643.21  | not significant |
| 5320 | SETD2        | -1.02 | 4.03E-01 | 4.95E-01 | 5768.42  | not significant |
| 5321 | RALA         | -1.02 | 3.87E-01 | 4.80E-01 | 3867.27  | not significant |
| 5322 | CLASRP       | -1.02 | 5.22E-01 | 6.11E-01 | 1959.21  | not significant |
| 5323 | MIA3         | -1.02 | 3.76E-01 | 4.68E-01 | 2799.89  | not significant |
| 5324 | LINC00996    | -1.02 | 7.10E-01 | 7.74E-01 | 16.57    | not significant |
| 5325 | WAPAL        | -1.02 | 2.82E-01 | 3.70E-01 | 5213.15  | not significant |
| 5326 | STARD10      | -1.02 | 7.29E-01 | 7.89E-01 | 165.91   | not significant |
| 5327 | MR1          | -1.02 | 5.41E-01 | 6.28E-01 | 945.91   | not significant |
| 5328 | RANBP3       | -1.02 | 3.60E-01 | 4.52E-01 | 2828.48  | not significant |
| 5329 | UHRF1BP1     | -1.02 | 4.15E-01 | 5.06E-01 | 2315.63  | not significant |
| 5330 | ACAP2        | -1.02 | 3.36E-01 | 4.27E-01 | 5360.20  | not significant |
| 5331 | GNA15        | -1.02 | 3.19E-01 | 4.10E-01 | 12445.30 | not significant |
| 5332 | ECH1         | -1.02 | 7.28E-01 | 7.89E-01 | 18.99    | not significant |
| 5333 | USP9X        | -1.02 | 4.21E-01 | 5.13E-01 | 5133.14  | not significant |
| 5334 | CRCP         | -1.02 | 3.99E-01 | 4.91E-01 | 2266.90  | not significant |
| 5335 | PPCS         | -1.02 | 5.90E-01 | 6.72E-01 | 675.22   | not significant |
| 5336 | DMPK         | -1.02 | 6.35E-01 | 7.10E-01 | 486.95   | not significant |
| 5337 | AREL1        | -1.02 | 3.71E-01 | 4.62E-01 | 2914.52  | not significant |
| 5338 | GAK          | -1.02 | 3.68E-01 | 4.60E-01 | 3751.05  | not significant |
| 5339 | NFKBIA       | -1.02 | 4.93E-01 | 5.83E-01 | 1254.48  | not significant |
| 5340 | PEX7         | -1.02 | 7.29E-01 | 7.90E-01 | 205.47   | not significant |
| 5341 | RAPGEF1      | -1.02 | 3.96E-01 | 4.88E-01 | 3095.12  | not significant |
| 5342 | ALAS1        | -1.02 | 4.75E-01 | 5.66E-01 | 1476.01  | not significant |
| 5343 | ZC3H18       | -1.02 | 3.40E-01 | 4.32E-01 | 4570.45  | not significant |
| 5344 | EVI5         | -1.02 | 7.63E-01 | 8.17E-01 | 110.14   | not significant |
| 5345 | TECR         | -1.02 | 4.09E-01 | 5.01E-01 | 3203.37  | not significant |
| 5346 | PIP5K1A      | -1.02 | 2.98E-01 | 3.87E-01 | 4453.81  | not significant |
| 5347 | GLB1L        | -1.02 | 7.67E-01 | 8.21E-01 | 69.95    | not significant |
| 5348 | ALDH4A1      | -1.02 | 6.77E-01 | 7.47E-01 | 369.84   | not significant |
| 5349 | ZNF597       | -1.02 | 7.59E-01 | 8.14E-01 | 117.18   | not significant |
| 5350 | ATP1A1-AS1   | -1.02 | 7.57E-01 | 8.12E-01 | 117.30   | not significant |
| 5351 | VPS16        | -1.02 | 5.13E-01 | 6.02E-01 | 1446.64  | not significant |
| 5352 | FNBP4        | -1.02 | 4.77E-01 | 5.68E-01 | 4100.89  | not significant |
| 5353 | TMEM120B     | -1.02 | 4.86E-01 | 5.76E-01 | 1524.83  | not significant |
| 5354 | PCYT2        | -1.02 | 4.14E-01 | 5.06E-01 | 2486.22  | not significant |
| 5355 | CCDC11       | -1.02 | 6.91E-01 | 7.58E-01 | 10.68    | not significant |
| 5356 | TRAPPC5      | -1.02 | 5.97E-01 | 6.77E-01 | 754.68   | not significant |

|      |              |       |          |          |          |                 |
|------|--------------|-------|----------|----------|----------|-----------------|
| 5357 | ESCO2        | -1.02 | 4.12E-01 | 5.03E-01 | 2863.31  | not significant |
| 5358 | MCM3         | -1.02 | 2.17E-01 | 2.96E-01 | 24256.23 | not significant |
| 5359 | RFC5         | -1.02 | 3.13E-01 | 4.04E-01 | 5007.91  | not significant |
| 5360 | MTIF2        | -1.02 | 5.84E-01 | 6.66E-01 | 792.61   | not significant |
| 5361 | RIPK1        | -1.02 | 4.84E-01 | 5.75E-01 | 1480.00  | not significant |
| 5362 | TRIM46       | -1.02 | 7.31E-01 | 7.91E-01 | 216.19   | not significant |
| 5363 | LYSMD3       | -1.02 | 5.47E-01 | 6.33E-01 | 1083.20  | not significant |
| 5364 | HID1         | -1.02 | 6.72E-01 | 7.41E-01 | 9.15     | not significant |
| 5365 | HSP90AB1     | -1.02 | 2.90E-01 | 3.78E-01 | 55189.07 | not significant |
| 5366 | CLSTN3       | -1.02 | 5.39E-01 | 6.26E-01 | 1200.06  | not significant |
| 5367 | RAB3B        | -1.02 | 7.45E-01 | 8.02E-01 | 21.32    | not significant |
| 5368 | SOGA3        | -1.02 | 5.96E-01 | 6.76E-01 | 761.27   | not significant |
| 5369 | PPP1R2P3     | -1.02 | 7.47E-01 | 8.03E-01 | 20.62    | not significant |
| 5370 | MAPRE1       | -1.02 | 2.89E-01 | 3.77E-01 | 14017.64 | not significant |
| 5371 | LOC101929512 | -1.02 | 7.25E-01 | 7.86E-01 | 15.43    | not significant |
| 5372 | PGS1         | -1.02 | 5.14E-01 | 6.02E-01 | 1347.75  | not significant |
| 5373 | H2AFY2       | -1.02 | 7.11E-01 | 7.75E-01 | 13.29    | not significant |
| 5374 | CNPY2        | -1.02 | 4.55E-01 | 5.47E-01 | 1998.08  | not significant |
| 5375 | SLC4A4       | -1.02 | 5.10E-01 | 5.99E-01 | 1348.02  | not significant |
| 5376 | SLC16A4      | -1.02 | 6.77E-01 | 7.46E-01 | 10.06    | not significant |
| 5377 | C12orf73     | -1.02 | 6.15E-01 | 6.93E-01 | 626.57   | not significant |
| 5378 | RPL23AP7     | -1.02 | 7.73E-01 | 8.25E-01 | 72.32    | not significant |
| 5379 | ZSWIM3       | -1.02 | 7.30E-01 | 7.90E-01 | 241.19   | not significant |
| 5380 | UBR4         | -1.02 | 7.59E-01 | 8.14E-01 | 6852.04  | not significant |
| 5381 | EXOSC2       | -1.02 | 5.08E-01 | 5.97E-01 | 1447.24  | not significant |
| 5382 | GTSE1        | -1.02 | 3.65E-01 | 4.57E-01 | 3711.89  | not significant |
| 5383 | NPLOC4       | -1.02 | 3.48E-01 | 4.40E-01 | 8366.27  | not significant |
| 5384 | PIGV         | -1.02 | 6.96E-01 | 7.62E-01 | 340.84   | not significant |
| 5385 | OSBPL5       | -1.02 | 4.33E-01 | 5.25E-01 | 2742.81  | not significant |
| 5386 | TEF          | -1.02 | 7.02E-01 | 7.67E-01 | 312.27   | not significant |
| 5387 | PTPRG        | -1.02 | 7.78E-01 | 8.30E-01 | 56.45    | not significant |
| 5388 | MGMT         | -1.02 | 5.84E-01 | 6.66E-01 | 1001.95  | not significant |
| 5389 | KCNIP2-AS1   | -1.02 | 6.80E-01 | 7.49E-01 | 8.29     | not significant |
| 5390 | RHPN1        | -1.02 | 6.96E-01 | 7.62E-01 | 2902.23  | not significant |
| 5391 | MRPL33       | -1.02 | 5.42E-01 | 6.28E-01 | 1322.19  | not significant |
| 5392 | ADAMTSL5     | -1.02 | 7.67E-01 | 8.20E-01 | 28.61    | not significant |
| 5393 | HTATSF1      | -1.02 | 6.67E-01 | 7.38E-01 | 5769.02  | not significant |
| 5394 | RNF10        | -1.02 | 3.29E-01 | 4.20E-01 | 6826.29  | not significant |
| 5395 | FAM214B      | -1.02 | 7.72E-01 | 8.25E-01 | 107.55   | not significant |
| 5396 | ZNF790       | -1.02 | 7.40E-01 | 7.98E-01 | 248.31   | not significant |
| 5397 | HSF1         | -1.02 | 4.87E-01 | 5.77E-01 | 2524.41  | not significant |
| 5398 | C1QTNF6      | -1.02 | 7.27E-01 | 7.88E-01 | 14.03    | not significant |
| 5399 | SLC25A43     | -1.02 | 7.65E-01 | 8.19E-01 | 142.22   | not significant |
| 5400 | SART1        | -1.02 | 4.75E-01 | 5.66E-01 | 3873.86  | not significant |
| 5401 | CASC5        | -1.02 | 4.81E-01 | 5.72E-01 | 3380.23  | not significant |
| 5402 | KANK1        | -1.02 | 7.79E-01 | 8.30E-01 | 92.92    | not significant |
| 5403 | PMP22        | -1.02 | 7.77E-01 | 8.29E-01 | 36.57    | not significant |
| 5404 | TMTC2        | -1.02 | 7.52E-01 | 8.09E-01 | 19.13    | not significant |
| 5405 | FAM86JP      | -1.02 | 7.80E-01 | 8.31E-01 | 38.85    | not significant |
| 5406 | PKNOX1       | -1.02 | 6.07E-01 | 6.86E-01 | 828.70   | not significant |
| 5407 | IFITM1       | -1.02 | 4.13E-01 | 5.04E-01 | 7375.91  | not significant |
| 5408 | RPA3OS       | -1.02 | 5.82E-01 | 6.64E-01 | 976.52   | not significant |
| 5409 | RBM44        | -1.02 | 7.76E-01 | 8.28E-01 | 33.29    | not significant |
| 5410 | RABGGTB      | -1.02 | 5.11E-01 | 6.00E-01 | 1950.56  | not significant |
| 5411 | ZNF286A      | -1.02 | 6.06E-01 | 6.85E-01 | 845.94   | not significant |
| 5412 | LOC100507501 | -1.02 | 7.86E-01 | 8.36E-01 | 53.20    | not significant |
| 5413 | C11orf94     | -1.02 | 7.00E-01 | 7.65E-01 | 9.86     | not significant |
| 5414 | NUSAP1       | -1.02 | 3.59E-01 | 4.51E-01 | 10059.51 | not significant |
| 5415 | HMGA1        | -1.02 | 2.65E-01 | 3.50E-01 | 15573.88 | not significant |
| 5416 | CCDC13       | -1.02 | 7.41E-01 | 7.99E-01 | 14.39    | not significant |
| 5417 | CNBP         | -1.02 | 4.07E-01 | 4.99E-01 | 14589.55 | not significant |
| 5418 | EIF4H        | -1.02 | 5.95E-01 | 6.76E-01 | 1046.33  | not significant |
| 5419 | C19orf83     | -1.02 | 7.56E-01 | 8.12E-01 | 18.72    | not significant |
| 5420 | CHRAC1       | -1.02 | 4.25E-01 | 5.17E-01 | 3859.54  | not significant |
| 5421 | PIGU         | -1.02 | 5.16E-01 | 6.04E-01 | 1700.49  | not significant |
| 5422 | WHSC1        | -1.02 | 3.63E-01 | 4.55E-01 | 17056.60 | not significant |
| 5423 | ZFYVE21      | -1.02 | 6.65E-01 | 7.37E-01 | 572.47   | not significant |
| 5424 | SRP9         | -1.02 | 3.73E-01 | 4.65E-01 | 726.82   | not significant |
| 5425 | ECE1         | -1.02 | 4.62E-01 | 5.54E-01 | 2579.38  | not significant |
| 5426 | VAPB         | -1.02 | 4.68E-01 | 5.59E-01 | 2185.48  | not significant |
| 5427 | ARFIP1       | -1.02 | 5.81E-01 | 6.64E-01 | 1065.89  | not significant |
| 5428 | DCUN1D3      | -1.02 | 7.72E-01 | 8.25E-01 | 145.52   | not significant |
| 5429 | MIS18BP1     | -1.02 | 4.65E-01 | 5.57E-01 | 2901.32  | not significant |
| 5430 | LOC100507547 | -1.02 | 6.81E-01 | 7.49E-01 | 7.33     | not significant |
| 5431 | PRKAA1       | -1.02 | 5.39E-01 | 6.26E-01 | 3106.35  | not significant |
| 5432 | OSBPL9       | -1.02 | 4.68E-01 | 5.59E-01 | 2163.99  | not significant |
| 5433 | SETX         | -1.02 | 4.55E-01 | 5.47E-01 | 4618.42  | not significant |
| 5434 | ENPP4        | -1.02 | 6.32E-01 | 7.08E-01 | 784.02   | not significant |
| 5435 | COQ10B       | -1.02 | 6.58E-01 | 7.31E-01 | 623.49   | not significant |
| 5436 | OR2AG2       | -1.02 | 7.10E-01 | 7.73E-01 | 9.26     | not significant |
| 5437 | NSUN3        | -1.02 | 7.45E-01 | 8.02E-01 | 249.88   | not significant |
| 5438 | RB1          | -1.02 | 3.13E-01 | 4.03E-01 | 17336.15 | not significant |
| 5439 | MAPK9        | -1.02 | 4.45E-01 | 5.38E-01 | 2719.81  | not significant |
| 5440 | CHST10       | -1.02 | 5.78E-01 | 6.61E-01 | 1207.94  | not significant |
| 5441 | SCRN3        | -1.02 | 6.89E-01 | 7.56E-01 | 533.59   | not significant |
| 5442 | SLC31A1      | -1.02 | 5.58E-01 | 6.43E-01 | 1343.08  | not significant |
| 5443 | CCM2         | -1.02 | 4.70E-01 | 5.61E-01 | 3237.75  | not significant |
| 5444 | C19orf47     | -1.02 | 5.95E-01 | 6.76E-01 | 1053.91  | not significant |

|      |               |       |          |          |          |                 |
|------|---------------|-------|----------|----------|----------|-----------------|
| 5445 | MALAT1        | -1.02 | 7.75E-01 | 8.27E-01 | 8853.88  | not significant |
| 5446 | JKAMP         | -1.02 | 5.83E-01 | 6.65E-01 | 1065.83  | not significant |
| 5447 | TANC1         | -1.02 | 7.40E-01 | 7.98E-01 | 12.33    | not significant |
| 5448 | THAP7-AS1     | -1.02 | 7.75E-01 | 8.27E-01 | 21.74    | not significant |
| 5449 | CEBPG         | -1.02 | 5.35E-01 | 6.22E-01 | 1970.11  | not significant |
| 5450 | SMG8          | -1.02 | 5.67E-01 | 6.51E-01 | 1289.40  | not significant |
| 5451 | LINC00173     | -1.02 | 7.97E-01 | 8.46E-01 | 42.48    | not significant |
| 5452 | C14orf1       | -1.02 | 5.72E-01 | 6.56E-01 | 1428.87  | not significant |
| 5453 | SPCS2         | -1.02 | 5.90E-01 | 6.72E-01 | 1509.47  | not significant |
| 5454 | PANK4         | -1.02 | 5.99E-01 | 6.79E-01 | 1064.77  | not significant |
| 5455 | ZC3H13        | -1.02 | 4.18E-01 | 5.10E-01 | 4511.37  | not significant |
| 5456 | MIR181A2HG    | -1.02 | 7.44E-01 | 8.01E-01 | 11.98    | not significant |
| 5457 | ITGB3BP       | -1.02 | 6.23E-01 | 7.00E-01 | 991.47   | not significant |
| 5458 | ARL6IP4       | -1.02 | 4.38E-01 | 5.30E-01 | 5787.76  | not significant |
| 5459 | ARHGAP17      | -1.02 | 4.63E-01 | 5.55E-01 | 2734.27  | not significant |
| 5460 | LRRC61        | -1.02 | 5.43E-01 | 6.29E-01 | 2083.72  | not significant |
| 5461 | INTS4         | -1.02 | 6.00E-01 | 6.80E-01 | 1156.21  | not significant |
| 5462 | AIG1          | -1.02 | 7.12E-01 | 7.76E-01 | 433.62   | not significant |
| 5463 | TMEM39B       | -1.02 | 5.74E-01 | 6.57E-01 | 1537.80  | not significant |
| 5464 | CMAS          | -1.02 | 5.79E-01 | 6.62E-01 | 1724.85  | not significant |
| 5465 | DARS-AS1      | -1.02 | 7.95E-01 | 8.44E-01 | 38.18    | not significant |
| 5466 | AP3M1         | -1.02 | 3.62E-01 | 4.55E-01 | 5691.32  | not significant |
| 5467 | ABHD14A       | -1.02 | 7.53E-01 | 8.09E-01 | 256.73   | not significant |
| 5468 | CMTR2         | -1.02 | 5.62E-01 | 6.46E-01 | 1419.60  | not significant |
| 5469 | IFIT5         | -1.02 | 6.77E-01 | 7.46E-01 | 578.32   | not significant |
| 5470 | LMBR1         | -1.02 | 4.96E-01 | 5.86E-01 | 2332.27  | not significant |
| 5471 | GPR125        | -1.02 | 5.38E-01 | 6.25E-01 | 1641.54  | not significant |
| 5472 | MPZ           | -1.02 | 8.00E-01 | 8.48E-01 | 39.54    | not significant |
| 5473 | ZBTB34        | -1.02 | 6.71E-01 | 7.41E-01 | 784.13   | not significant |
| 5474 | KCTD21-AS1    | -1.02 | 7.80E-01 | 8.31E-01 | 20.34    | not significant |
| 5475 | ERP44         | -1.02 | 5.31E-01 | 6.19E-01 | 1956.65  | not significant |
| 5476 | ALG1          | -1.02 | 5.95E-01 | 6.75E-01 | 1152.84  | not significant |
| 5477 | KIAA1614      | -1.02 | 7.41E-01 | 7.99E-01 | 11.77    | not significant |
| 5478 | PPTC7         | -1.02 | 4.95E-01 | 5.85E-01 | 3395.25  | not significant |
| 5479 | LOC101928370  | -1.02 | 7.50E-01 | 8.07E-01 | 11.58    | not significant |
| 5480 | C7orf73       | -1.02 | 4.70E-01 | 5.62E-01 | 2913.31  | not significant |
| 5481 | TP53BP1       | -1.02 | 5.45E-01 | 6.31E-01 | 2197.67  | not significant |
| 5482 | NUDT15        | -1.02 | 6.05E-01 | 6.85E-01 | 1662.70  | not significant |
| 5483 | SLC25A16      | -1.02 | 7.15E-01 | 7.78E-01 | 447.39   | not significant |
| 5484 | RBM15         | -1.02 | 5.87E-01 | 6.69E-01 | 1517.49  | not significant |
| 5485 | TXNRD2        | -1.02 | 7.31E-01 | 7.91E-01 | 379.32   | not significant |
| 5486 | JAKMIP2       | -1.02 | 7.03E-01 | 7.68E-01 | 535.49   | not significant |
| 5487 | PDXDC1        | -1.02 | 5.06E-01 | 5.96E-01 | 2582.41  | not significant |
| 5488 | FKBP1AP1      | -1.02 | 8.02E-01 | 8.49E-01 | 35.25    | not significant |
| 5489 | TMEM38A       | -1.02 | 7.30E-01 | 7.90E-01 | 9.87     | not significant |
| 5490 | ARL6          | -1.02 | 8.08E-01 | 8.54E-01 | 77.34    | not significant |
| 5491 | ADH5          | -1.02 | 4.56E-01 | 5.47E-01 | 4271.00  | not significant |
| 5492 | MYOM2         | -1.02 | 7.89E-01 | 8.39E-01 | 170.10   | not significant |
| 5493 | SLC9B2        | -1.02 | 5.67E-01 | 6.51E-01 | 1756.32  | not significant |
| 5494 | LRCH3         | -1.02 | 6.65E-01 | 7.37E-01 | 735.99   | not significant |
| 5495 | ITGAL         | -1.02 | 5.56E-01 | 6.42E-01 | 3674.05  | not significant |
| 5496 | ROM1          | -1.02 | 7.83E-01 | 8.33E-01 | 17.29    | not significant |
| 5497 | HMGB2         | -1.02 | 4.75E-01 | 5.67E-01 | 33418.73 | not significant |
| 5498 | HIVEP3        | -1.02 | 4.74E-01 | 5.66E-01 | 3930.29  | not significant |
| 5499 | TOPBP1        | -1.02 | 3.91E-01 | 4.84E-01 | 10195.12 | not significant |
| 5500 | RSPH3         | -1.02 | 8.10E-01 | 8.55E-01 | 92.55    | not significant |
| 5501 | TMEM230       | -1.02 | 4.22E-01 | 5.13E-01 | 5019.43  | not significant |
| 5502 | GMDS          | -1.02 | 5.92E-01 | 6.73E-01 | 1553.97  | not significant |
| 5503 | ABT1          | -1.02 | 7.65E-01 | 8.19E-01 | 279.98   | not significant |
| 5504 | HIC2          | -1.02 | 6.85E-01 | 7.53E-01 | 624.37   | not significant |
| 5505 | SNHG15        | -1.02 | 5.96E-01 | 6.76E-01 | 1269.43  | not significant |
| 5506 | TMEM161B      | -1.02 | 6.58E-01 | 7.31E-01 | 843.94   | not significant |
| 5507 | ILDR2         | -1.02 | 6.98E-01 | 7.64E-01 | 644.06   | not significant |
| 5508 | ZDHHC20       | -1.02 | 4.26E-01 | 5.18E-01 | 7009.38  | not significant |
| 5509 | PRPF39        | -1.02 | 6.14E-01 | 6.92E-01 | 2088.24  | not significant |
| 5510 | MRPL57        | -1.02 | 5.85E-01 | 6.67E-01 | 2317.24  | not significant |
| 5511 | SCAF1         | -1.02 | 5.28E-01 | 6.16E-01 | 3438.96  | not significant |
| 5512 | CCBL1         | -1.02 | 7.32E-01 | 7.92E-01 | 398.11   | not significant |
| 5513 | PRG2          | -1.02 | 8.10E-01 | 8.55E-01 | 34.62    | not significant |
| 5514 | TMEM147       | -1.02 | 5.91E-01 | 6.72E-01 | 1711.10  | not significant |
| 5515 | ELAC1         | -1.02 | 7.95E-01 | 8.43E-01 | 183.86   | not significant |
| 5516 | PWP1          | -1.02 | 5.09E-01 | 5.98E-01 | 2936.29  | not significant |
| 5517 | TRIM28        | -1.02 | 3.76E-01 | 4.68E-01 | 26508.90 | not significant |
| 5518 | ZWINT         | -1.02 | 4.34E-01 | 5.26E-01 | 7429.64  | not significant |
| 5519 | WAC           | -1.02 | 3.68E-01 | 4.60E-01 | 9101.39  | not significant |
| 5520 | ANKRD46       | -1.02 | 5.81E-01 | 6.64E-01 | 1587.69  | not significant |
| 5521 | LRRC69        | -1.02 | 8.07E-01 | 8.52E-01 | 26.18    | not significant |
| 5522 | MYO1F         | -1.02 | 8.20E-01 | 8.64E-01 | 67.29    | not significant |
| 5523 | PARD6A        | -1.02 | 7.77E-01 | 8.28E-01 | 261.77   | not significant |
| 5524 | TNRC6B        | -1.02 | 5.91E-01 | 6.72E-01 | 1807.56  | not significant |
| 5525 | UBE4B         | -1.02 | 5.25E-01 | 6.13E-01 | 2595.83  | not significant |
| 5526 | RNF168        | -1.02 | 5.13E-01 | 6.02E-01 | 2667.54  | not significant |
| 5527 | PCNXL3        | -1.02 | 5.59E-01 | 6.44E-01 | 3453.28  | not significant |
| 5528 | CTD-2201118.1 | -1.02 | 8.06E-01 | 8.52E-01 | 24.92    | not significant |
| 5529 | SMOX          | -1.02 | 8.04E-01 | 8.50E-01 | 151.62   | not significant |
| 5530 | SUMO3         | -1.02 | 5.07E-01 | 5.97E-01 | 4656.04  | not significant |
| 5531 | FGFR1OP2      | -1.02 | 5.30E-01 | 6.18E-01 | 3049.36  | not significant |
| 5532 | ACTA2-AS1     | -1.02 | 7.75E-01 | 8.27E-01 | 13.43    | not significant |

|      |               |       |          |          |          |                 |
|------|---------------|-------|----------|----------|----------|-----------------|
| 5533 | ZBTB43        | -1.02 | 7.02E-01 | 7.67E-01 | 621.15   | not significant |
| 5534 | CASP8AP2      | -1.02 | 4.75E-01 | 5.66E-01 | 4104.40  | not significant |
| 5535 | ARHGAP39      | -1.02 | 7.98E-01 | 8.46E-01 | 19.16    | not significant |
| 5536 | ZNF609        | -1.02 | 5.33E-01 | 6.21E-01 | 2941.82  | not significant |
| 5537 | MAX           | -1.02 | 4.42E-01 | 5.34E-01 | 5249.55  | not significant |
| 5538 | CBX8          | -1.02 | 7.42E-01 | 8.00E-01 | 433.89   | not significant |
| 5539 | CDKN2B-AS1    | -1.02 | 8.01E-01 | 8.48E-01 | 20.52    | not significant |
| 5540 | TMEM232       | -1.02 | 7.98E-01 | 8.46E-01 | 18.82    | not significant |
| 5541 | RAD21         | -1.02 | 4.00E-01 | 4.92E-01 | 38629.44 | not significant |
| 5542 | FXYD5         | -1.02 | 5.23E-01 | 6.11E-01 | 2883.37  | not significant |
| 5543 | MAP3K7        | -1.02 | 4.92E-01 | 5.82E-01 | 3291.78  | not significant |
| 5544 | LSM14A        | -1.02 | 5.96E-01 | 6.76E-01 | 1938.65  | not significant |
| 5545 | TOR2A         | -1.02 | 6.97E-01 | 7.63E-01 | 710.40   | not significant |
| 5546 | NAP1L4        | -1.02 | 4.84E-01 | 5.74E-01 | 8993.02  | not significant |
| 5547 | PRKRIR        | -1.02 | 5.31E-01 | 6.19E-01 | 3102.11  | not significant |
| 5548 | SLC25A33      | -1.02 | 7.62E-01 | 8.17E-01 | 373.84   | not significant |
| 5549 | C17orf67      | -1.02 | 8.07E-01 | 8.52E-01 | 178.30   | not significant |
| 5550 | SENP6         | -1.02 | 4.65E-01 | 5.56E-01 | 5116.39  | not significant |
| 5551 | FCER1G        | -1.02 | 7.25E-01 | 7.87E-01 | 6.79     | not significant |
| 5552 | RNF11         | -1.02 | 5.57E-01 | 6.42E-01 | 2150.46  | not significant |
| 5553 | CREBBP        | -1.02 | 5.78E-01 | 6.62E-01 | 3347.23  | not significant |
| 5554 | CLN5          | -1.02 | 7.37E-01 | 7.96E-01 | 535.16   | not significant |
| 5555 | TIMM17B       | -1.02 | 7.47E-01 | 8.04E-01 | 450.71   | not significant |
| 5556 | KIAA1191      | -1.02 | 5.81E-01 | 6.64E-01 | 1843.92  | not significant |
| 5557 | RNF165        | -1.02 | 8.09E-01 | 8.54E-01 | 20.42    | not significant |
| 5558 | GNMT          | -1.02 | 8.19E-01 | 8.62E-01 | 26.57    | not significant |
| 5559 | LAGE3         | -1.02 | 7.80E-01 | 8.31E-01 | 328.85   | not significant |
| 5560 | CASC4         | -1.02 | 5.63E-01 | 6.48E-01 | 2223.75  | not significant |
| 5561 | GPATCH11      | -1.02 | 6.21E-01 | 6.98E-01 | 1749.64  | not significant |
| 5562 | RASA2         | -1.02 | 6.37E-01 | 7.12E-01 | 1555.05  | not significant |
| 5563 | SENP5         | -1.02 | 5.74E-01 | 6.57E-01 | 2191.57  | not significant |
| 5564 | OSBPL8        | -1.02 | 4.86E-01 | 5.76E-01 | 8290.13  | not significant |
| 5565 | EFTUD1        | -1.02 | 6.53E-01 | 7.27E-01 | 1273.15  | not significant |
| 5566 | DIS3L         | -1.02 | 6.08E-01 | 6.87E-01 | 1903.57  | not significant |
| 5567 | HERC2P3       | -1.02 | 8.01E-01 | 8.48E-01 | 15.15    | not significant |
| 5568 | PIAS1         | -1.02 | 6.62E-01 | 7.34E-01 | 1035.26  | not significant |
| 5569 | TIGD2         | -1.02 | 8.23E-01 | 8.66E-01 | 127.34   | not significant |
| 5570 | COX4I1        | -1.02 | 5.58E-01 | 6.43E-01 | 8313.38  | not significant |
| 5571 | METTL22       | -1.02 | 7.59E-01 | 8.14E-01 | 465.00   | not significant |
| 5572 | SRP72         | -1.02 | 4.24E-01 | 5.16E-01 | 7921.06  | not significant |
| 5573 | GSKIP         | -1.02 | 6.82E-01 | 7.51E-01 | 1109.52  | not significant |
| 5574 | IL1RAP        | -1.02 | 8.36E-01 | 8.76E-01 | 55.90    | not significant |
| 5575 | VPS37B        | -1.02 | 5.11E-01 | 6.00E-01 | 3562.34  | not significant |
| 5576 | TAF1          | -1.02 | 6.12E-01 | 6.90E-01 | 2493.99  | not significant |
| 5577 | NPIPA5        | -1.02 | 8.20E-01 | 8.64E-01 | 156.46   | not significant |
| 5578 | UPP1          | -1.02 | 8.31E-01 | 8.72E-01 | 29.93    | not significant |
| 5579 | MAP3K14-AS1   | -1.02 | 8.04E-01 | 8.51E-01 | 222.27   | not significant |
| 5580 | ASGR1         | -1.02 | 7.56E-01 | 8.11E-01 | 7.72     | not significant |
| 5581 | SENP1         | -1.02 | 5.39E-01 | 6.26E-01 | 3702.32  | not significant |
| 5582 | ARL16         | -1.02 | 6.70E-01 | 7.40E-01 | 1233.60  | not significant |
| 5583 | RAB18         | -1.02 | 6.00E-01 | 6.79E-01 | 1967.75  | not significant |
| 5584 | USP46-AS1     | -1.02 | 7.81E-01 | 8.32E-01 | 11.23    | not significant |
| 5585 | BANP          | -1.02 | 7.43E-01 | 8.01E-01 | 573.20   | not significant |
| 5586 | RNF139        | -1.02 | 6.11E-01 | 6.90E-01 | 1834.56  | not significant |
| 5587 | LRCH1         | -1.02 | 6.35E-01 | 7.10E-01 | 1462.38  | not significant |
| 5588 | MCAT          | -1.02 | 7.34E-01 | 7.93E-01 | 601.99   | not significant |
| 5589 | CCDC65        | -1.02 | 7.71E-01 | 8.24E-01 | 8.91     | not significant |
| 5590 | LY6G5B        | -1.02 | 8.01E-01 | 8.48E-01 | 14.11    | not significant |
| 5591 | TMBIM1        | -1.02 | 7.40E-01 | 7.98E-01 | 589.22   | not significant |
| 5592 | TUSC5         | -1.02 | 7.79E-01 | 8.30E-01 | 366.55   | not significant |
| 5593 | CEP57L1       | -1.02 | 6.89E-01 | 7.57E-01 | 1044.46  | not significant |
| 5594 | TMEM242       | -1.02 | 8.35E-01 | 8.75E-01 | 121.98   | not significant |
| 5595 | INF2          | -1.02 | 5.99E-01 | 6.79E-01 | 2593.22  | not significant |
| 5596 | UBAC1         | -1.02 | 6.89E-01 | 7.57E-01 | 1124.33  | not significant |
| 5597 | C8orf76       | -1.02 | 8.32E-01 | 8.73E-01 | 97.36    | not significant |
| 5598 | ZNF660        | -1.02 | 7.90E-01 | 8.40E-01 | 10.61    | not significant |
| 5599 | DDX50         | -1.02 | 5.85E-01 | 6.67E-01 | 3471.26  | not significant |
| 5600 | ARMCX5-GPRASF | -1.01 | 8.37E-01 | 8.77E-01 | 32.53    | not significant |
| 5601 | SMNDC1        | -1.01 | 6.00E-01 | 6.80E-01 | 2370.06  | not significant |
| 5602 | VPS4A         | -1.01 | 5.81E-01 | 6.63E-01 | 3462.67  | not significant |
| 5603 | ANAPC16       | -1.01 | 5.71E-01 | 6.55E-01 | 3674.46  | not significant |
| 5604 | FAIM          | -1.01 | 8.22E-01 | 8.65E-01 | 195.40   | not significant |
| 5605 | CUEDC2        | -1.01 | 5.75E-01 | 6.59E-01 | 2473.83  | not significant |
| 5606 | PET100        | -1.01 | 7.31E-01 | 7.91E-01 | 663.32   | not significant |
| 5607 | SLAMF1        | -1.01 | 7.84E-01 | 8.34E-01 | 343.03   | not significant |
| 5608 | TMLHE         | -1.01 | 8.43E-01 | 8.82E-01 | 74.59    | not significant |
| 5609 | GDAP2         | -1.01 | 7.26E-01 | 7.87E-01 | 716.23   | not significant |
| 5610 | RECQL         | -1.01 | 5.45E-01 | 6.31E-01 | 3492.83  | not significant |
| 5611 | CD274         | -1.01 | 8.45E-01 | 8.83E-01 | 43.87    | not significant |
| 5612 | ACOT9         | -1.01 | 8.07E-01 | 8.53E-01 | 250.50   | not significant |
| 5613 | CHID1         | -1.01 | 6.44E-01 | 7.19E-01 | 1479.16  | not significant |
| 5614 | FAM149A       | -1.01 | 8.35E-01 | 8.75E-01 | 131.57   | not significant |
| 5615 | VKORC1L1      | -1.01 | 5.42E-01 | 6.29E-01 | 3623.81  | not significant |
| 5616 | FAM3C         | -1.01 | 7.97E-01 | 8.46E-01 | 313.27   | not significant |
| 5617 | MRPS26        | -1.01 | 6.65E-01 | 7.37E-01 | 1976.21  | not significant |
| 5618 | VPS37C        | -1.01 | 8.32E-01 | 8.73E-01 | 163.03   | not significant |
| 5619 | STAM2         | -1.01 | 7.22E-01 | 7.84E-01 | 831.61   | not significant |
| 5620 | CSNK1G1       | -1.01 | 6.52E-01 | 7.25E-01 | 1932.13  | not significant |



|      |            |       |          |          |          |                 |
|------|------------|-------|----------|----------|----------|-----------------|
| 5621 | MED8       | -1.01 | 7.03E-01 | 7.68E-01 | 942.87   | not significant |
| 5622 | MTMR9      | -1.01 | 7.34E-01 | 7.94E-01 | 946.88   | not significant |
| 5623 | PTEN       | -1.01 | 5.04E-01 | 5.94E-01 | 12482.63 | not significant |
| 5624 | ZNF598     | -1.01 | 6.04E-01 | 6.84E-01 | 2602.64  | not significant |
| 5625 | SMYD2      | -1.01 | 6.10E-01 | 6.88E-01 | 2031.22  | not significant |
| 5626 | KHK        | -1.01 | 8.29E-01 | 8.70E-01 | 176.47   | not significant |
| 5627 | TADA1      | -1.01 | 7.08E-01 | 7.72E-01 | 1067.30  | not significant |
| 5628 | NCOA7      | -1.01 | 6.76E-01 | 7.45E-01 | 1256.99  | not significant |
| 5629 | MIP        | -1.01 | 7.16E-01 | 7.79E-01 | 880.91   | not significant |
| 5630 | QSER1      | -1.01 | 6.61E-01 | 7.33E-01 | 1913.41  | not significant |
| 5631 | COLGALT1   | -1.01 | 5.58E-01 | 6.42E-01 | 3576.45  | not significant |
| 5632 | ZNF576     | -1.01 | 8.04E-01 | 8.51E-01 | 365.79   | not significant |
| 5633 | GPRIN1     | -1.01 | 7.97E-01 | 8.45E-01 | 10.44    | not significant |
| 5634 | GOLPH3     | -1.01 | 5.72E-01 | 6.56E-01 | 3504.10  | not significant |
| 5635 | KIF18B     | -1.01 | 7.69E-01 | 8.23E-01 | 4498.27  | not significant |
| 5636 | RRM2B      | -1.01 | 7.40E-01 | 7.98E-01 | 717.16   | not significant |
| 5637 | TAPT1-AS1  | -1.01 | 8.54E-01 | 8.90E-01 | 77.54    | not significant |
| 5638 | PITPNA-AS1 | -1.01 | 8.18E-01 | 8.62E-01 | 267.80   | not significant |
| 5639 | RFXANK     | -1.01 | 7.05E-01 | 7.69E-01 | 1047.77  | not significant |
| 5640 | NUP85      | -1.01 | 5.74E-01 | 6.57E-01 | 4107.89  | not significant |
| 5641 | RABL6      | -1.01 | 5.84E-01 | 6.66E-01 | 3440.07  | not significant |
| 5642 | GRIK5      | -1.01 | 8.21E-01 | 8.64E-01 | 12.96    | not significant |
| 5643 | SMG6       | -1.01 | 5.93E-01 | 6.74E-01 | 2978.91  | not significant |
| 5644 | TMED10P1   | -1.01 | 8.31E-01 | 8.72E-01 | 16.35    | not significant |
| 5645 | PPA1       | -1.01 | 5.75E-01 | 6.59E-01 | 8138.38  | not significant |
| 5646 | MSL1       | -1.01 | 5.56E-01 | 6.41E-01 | 3997.25  | not significant |
| 5647 | LINC00909  | -1.01 | 7.71E-01 | 8.24E-01 | 596.01   | not significant |
| 5648 | TMEM177    | -1.01 | 8.31E-01 | 8.72E-01 | 256.02   | not significant |
| 5649 | DLX4       | -1.01 | 8.22E-01 | 8.65E-01 | 12.86    | not significant |
| 5650 | EPS8L1     | -1.01 | 8.55E-01 | 8.91E-01 | 106.38   | not significant |
| 5651 | SNX17      | -1.01 | 6.18E-01 | 6.95E-01 | 4378.37  | not significant |
| 5652 | OCLM       | -1.01 | 8.41E-01 | 8.80E-01 | 21.32    | not significant |
| 5653 | SCEL       | -1.01 | 6.57E-01 | 7.30E-01 | 1927.06  | not significant |
| 5654 | DCUN1D1    | -1.01 | 6.78E-01 | 7.47E-01 | 1536.07  | not significant |
| 5655 | GANAB      | -1.01 | 5.07E-01 | 5.96E-01 | 14261.71 | not significant |
| 5656 | CNIH3      | -1.01 | 8.47E-01 | 8.85E-01 | 23.96    | not significant |
| 5657 | MSRB1      | -1.01 | 8.05E-01 | 8.51E-01 | 375.90   | not significant |
| 5658 | TPTEP1     | -1.01 | 7.63E-01 | 8.17E-01 | 647.91   | not significant |
| 5659 | SLC25A1    | -1.01 | 7.59E-01 | 8.14E-01 | 801.77   | not significant |
| 5660 | MAPKAPK5   | -1.01 | 6.41E-01 | 7.16E-01 | 2435.93  | not significant |
| 5661 | SLC43A1    | -1.01 | 8.43E-01 | 8.82E-01 | 199.27   | not significant |
| 5662 | ENTPD1-AS1 | -1.01 | 8.62E-01 | 8.97E-01 | 68.90    | not significant |
| 5663 | HOOK3      | -1.01 | 6.35E-01 | 7.11E-01 | 2871.59  | not significant |
| 5664 | TNFSF8     | -1.01 | 8.52E-01 | 8.89E-01 | 132.44   | not significant |
| 5665 | EMC9       | -1.01 | 7.87E-01 | 8.37E-01 | 482.26   | not significant |
| 5666 | PDK1       | -1.01 | 6.70E-01 | 7.40E-01 | 1657.46  | not significant |
| 5667 | TECPR2     | -1.01 | 7.63E-01 | 8.17E-01 | 711.43   | not significant |
| 5668 | TRIM47     | -1.01 | 8.63E-01 | 8.97E-01 | 75.18    | not significant |
| 5669 | SEC22C     | -1.01 | 6.69E-01 | 7.39E-01 | 2252.94  | not significant |
| 5670 | MRPL32     | -1.01 | 7.30E-01 | 7.90E-01 | 1304.30  | not significant |
| 5671 | BMP1       | -1.01 | 8.15E-01 | 8.59E-01 | 334.79   | not significant |
| 5672 | VWA9       | -1.01 | 6.78E-01 | 7.47E-01 | 1747.28  | not significant |
| 5673 | LLGL2      | -1.01 | 8.63E-01 | 8.97E-01 | 82.36    | not significant |
| 5674 | ALDH16A1   | -1.01 | 7.10E-01 | 7.73E-01 | 1530.36  | not significant |
| 5675 | NDUFB2     | -1.01 | 8.36E-01 | 8.76E-01 | 1268.77  | not significant |
| 5676 | MFHAS1     | -1.01 | 6.17E-01 | 6.95E-01 | 5551.03  | not significant |
| 5677 | RAB9A      | -1.01 | 8.14E-01 | 8.59E-01 | 361.12   | not significant |
| 5678 | UBB        | -1.01 | 4.75E-01 | 5.66E-01 | 21311.40 | not significant |
| 5679 | CDC45      | -1.01 | 6.16E-01 | 6.94E-01 | 4135.75  | not significant |
| 5680 | SMUG1      | -1.01 | 7.93E-01 | 8.42E-01 | 480.60   | not significant |
| 5681 | HIST1H4B   | -1.01 | 8.05E-01 | 8.51E-01 | 8.56     | not significant |
| 5682 | SCLT1      | -1.01 | 7.39E-01 | 7.98E-01 | 924.11   | not significant |
| 5683 | PCDH18     | -1.01 | 8.65E-01 | 8.99E-01 | 39.49    | not significant |
| 5684 | NPM1       | -1.01 | 6.05E-01 | 6.85E-01 | 31786.21 | not significant |
| 5685 | CS         | -1.01 | 4.90E-01 | 5.80E-01 | 10607.57 | not significant |
| 5686 | PRDM8      | -1.01 | 8.66E-01 | 9.00E-01 | 75.91    | not significant |
| 5687 | MRFAP1L1   | -1.01 | 6.83E-01 | 7.52E-01 | 2276.02  | not significant |
| 5688 | VPS54      | -1.01 | 7.31E-01 | 7.91E-01 | 1189.13  | not significant |
| 5689 | RPGRIP1L   | -1.01 | 8.05E-01 | 8.51E-01 | 418.81   | not significant |
| 5690 | GPANK1     | -1.01 | 8.62E-01 | 8.97E-01 | 115.06   | not significant |
| 5691 | C9orf40    | -1.01 | 7.29E-01 | 7.90E-01 | 1154.97  | not significant |
| 5692 | CD7        | -1.01 | 5.93E-01 | 6.74E-01 | 7428.31  | not significant |
| 5693 | VWA5A      | -1.01 | 8.67E-01 | 9.00E-01 | 36.14    | not significant |
| 5694 | DHX38      | -1.01 | 6.26E-01 | 7.03E-01 | 3033.94  | not significant |
| 5695 | PFKL       | -1.01 | 6.63E-01 | 7.35E-01 | 2442.59  | not significant |
| 5696 | ULK4       | -1.01 | 8.50E-01 | 8.88E-01 | 207.76   | not significant |
| 5697 | CALML4     | -1.01 | 8.27E-01 | 8.69E-01 | 340.47   | not significant |
| 5698 | ZFP91      | -1.01 | 6.19E-01 | 6.97E-01 | 3455.08  | not significant |
| 5699 | ERI2       | -1.01 | 7.21E-01 | 7.83E-01 | 1210.48  | not significant |
| 5700 | TLE3       | -1.01 | 5.92E-01 | 6.73E-01 | 8571.96  | not significant |
| 5701 | DTX2       | -1.01 | 8.01E-01 | 8.48E-01 | 646.58   | not significant |
| 5702 | PARP9      | -1.01 | 6.47E-01 | 7.22E-01 | 2751.94  | not significant |
| 5703 | NAPRT      | -1.01 | 8.27E-01 | 8.69E-01 | 403.66   | not significant |
| 5704 | FGFR4      | -1.01 | 8.62E-01 | 8.96E-01 | 25.41    | not significant |
| 5705 | ZNF256     | -1.01 | 8.36E-01 | 8.76E-01 | 321.82   | not significant |
| 5706 | FBXO48     | -1.01 | 8.60E-01 | 8.95E-01 | 158.73   | not significant |
| 5707 | PELI1      | -1.01 | 8.05E-01 | 8.51E-01 | 493.97   | not significant |
| 5708 | SECISBP2   | -1.01 | 7.03E-01 | 7.67E-01 | 1880.74  | not significant |

|      |            |       |          |          |          |                 |
|------|------------|-------|----------|----------|----------|-----------------|
| 5709 | C6orf163   | -1.01 | 8.36E-01 | 8.76E-01 | 11.47    | not significant |
| 5710 | TEX2       | -1.01 | 7.08E-01 | 7.72E-01 | 1505.58  | not significant |
| 5711 | RALBP1     | -1.01 | 6.31E-01 | 7.08E-01 | 4925.88  | not significant |
| 5712 | VPS9D1     | -1.01 | 8.76E-01 | 9.07E-01 | 75.81    | not significant |
| 5713 | LTBP1      | -1.01 | 8.81E-01 | 9.10E-01 | 109.11   | not significant |
| 5714 | RC3H1      | -1.01 | 7.40E-01 | 7.98E-01 | 1646.09  | not significant |
| 5715 | SIRT6      | -1.01 | 7.73E-01 | 8.25E-01 | 920.69   | not significant |
| 5716 | LINC00467  | -1.01 | 8.77E-01 | 9.08E-01 | 58.83    | not significant |
| 5717 | C14orf2    | -1.01 | 6.89E-01 | 7.57E-01 | 3408.04  | not significant |
| 5718 | CMTM2      | -1.01 | 8.39E-01 | 8.78E-01 | 12.00    | not significant |
| 5719 | PUM2       | -1.01 | 5.63E-01 | 6.48E-01 | 9936.58  | not significant |
| 5720 | GAS8       | -1.01 | 8.74E-01 | 9.05E-01 | 33.15    | not significant |
| 5721 | CHD1       | -1.01 | 6.51E-01 | 7.25E-01 | 4487.67  | not significant |
| 5722 | POLB       | -1.01 | 7.33E-01 | 7.92E-01 | 1351.22  | not significant |
| 5723 | FMO4       | -1.01 | 8.78E-01 | 9.08E-01 | 39.11    | not significant |
| 5724 | HELZ       | -1.01 | 6.48E-01 | 7.23E-01 | 9015.86  | not significant |
| 5725 | FBXO25     | -1.01 | 7.02E-01 | 7.67E-01 | 2656.62  | not significant |
| 5726 | LOC344967  | -1.01 | 8.51E-01 | 8.88E-01 | 14.26    | not significant |
| 5727 | ATAD2B     | -1.01 | 7.27E-01 | 7.88E-01 | 1729.04  | not significant |
| 5728 | NRSN2-AS1  | -1.01 | 8.74E-01 | 9.06E-01 | 29.42    | not significant |
| 5729 | PXDN       | -1.01 | 6.51E-01 | 7.25E-01 | 3588.06  | not significant |
| 5730 | EPN1       | -1.01 | 6.79E-01 | 7.48E-01 | 2728.31  | not significant |
| 5731 | C19orf18   | -1.01 | 8.37E-01 | 8.77E-01 | 10.25    | not significant |
| 5732 | CTPS1      | -1.01 | 6.22E-01 | 6.99E-01 | 6683.76  | not significant |
| 5733 | NDN        | -1.01 | 8.43E-01 | 8.81E-01 | 362.40   | not significant |
| 5734 | CBY1       | -1.01 | 8.76E-01 | 9.07E-01 | 130.47   | not significant |
| 5735 | ITGB3      | -1.01 | 8.82E-01 | 9.11E-01 | 42.87    | not significant |
| 5736 | UTP14C     | -1.01 | 7.70E-01 | 8.24E-01 | 1107.36  | not significant |
| 5737 | SCLY       | -1.01 | 8.39E-01 | 8.78E-01 | 9.80     | not significant |
| 5738 | ZFAND6     | -1.01 | 7.38E-01 | 7.97E-01 | 1355.10  | not significant |
| 5739 | DUSP5P1    | -1.01 | 8.74E-01 | 9.05E-01 | 23.55    | not significant |
| 5740 | SLC39A8    | -1.01 | 6.65E-01 | 7.37E-01 | 3544.75  | not significant |
| 5741 | OSBP       | -1.01 | 6.69E-01 | 7.39E-01 | 3182.68  | not significant |
| 5742 | TRAPPC8    | -1.01 | 6.82E-01 | 7.50E-01 | 2583.75  | not significant |
| 5743 | GLT8D1     | -1.01 | 7.66E-01 | 8.20E-01 | 1224.45  | not significant |
| 5744 | ALPK3      | -1.01 | 8.49E-01 | 8.86E-01 | 13.18    | not significant |
| 5745 | LETM1      | -1.01 | 6.20E-01 | 6.97E-01 | 4986.97  | not significant |
| 5746 | PREX1      | -1.01 | 6.88E-01 | 7.56E-01 | 3163.21  | not significant |
| 5747 | DDX6       | -1.01 | 7.40E-01 | 7.98E-01 | 1952.67  | not significant |
| 5748 | FXN        | -1.01 | 8.76E-01 | 9.07E-01 | 219.04   | not significant |
| 5749 | FAM134B    | -1.01 | 7.26E-01 | 7.87E-01 | 1803.65  | not significant |
| 5750 | ZNF287     | -1.01 | 8.58E-01 | 8.94E-01 | 299.77   | not significant |
| 5751 | ZNF343     | -1.01 | 8.16E-01 | 8.60E-01 | 595.69   | not significant |
| 5752 | NEDD4      | -1.01 | 7.43E-01 | 8.01E-01 | 1553.37  | not significant |
| 5753 | RAB19      | -1.01 | 8.86E-01 | 9.14E-01 | 37.53    | not significant |
| 5754 | KIAA1586   | -1.01 | 8.23E-01 | 8.66E-01 | 535.12   | not significant |
| 5755 | NBEAL2     | -1.01 | 8.62E-01 | 8.97E-01 | 7269.94  | not significant |
| 5756 | REV1       | -1.01 | 7.57E-01 | 8.12E-01 | 1390.13  | not significant |
| 5757 | FIS1       | -1.01 | 7.67E-01 | 8.21E-01 | 1670.05  | not significant |
| 5758 | ACBD7      | -1.01 | 7.55E-01 | 8.11E-01 | 1444.77  | not significant |
| 5759 | VPS9D1-AS1 | -1.01 | 8.63E-01 | 8.97E-01 | 394.72   | not significant |
| 5760 | UNC93B1    | -1.01 | 8.86E-01 | 9.14E-01 | 23.39    | not significant |
| 5761 | SERGEF     | -1.01 | 8.32E-01 | 8.73E-01 | 525.44   | not significant |
| 5762 | GFRA3      | -1.01 | 8.63E-01 | 8.97E-01 | 12.31    | not significant |
| 5763 | ATP5A1     | -1.01 | 6.98E-01 | 7.63E-01 | 20511.17 | not significant |
| 5764 | GMPR2      | -1.01 | 7.69E-01 | 8.22E-01 | 1757.56  | not significant |
| 5765 | LASP1      | -1.01 | 6.67E-01 | 7.38E-01 | 10470.30 | not significant |
| 5766 | PPP3CA     | -1.01 | 7.63E-01 | 8.17E-01 | 1544.60  | not significant |
| 5767 | HIST1H4D   | -1.01 | 8.58E-01 | 8.94E-01 | 9.96     | not significant |
| 5768 | ZNF134     | -1.01 | 7.99E-01 | 8.47E-01 | 1039.71  | not significant |
| 5769 | SLC37A4    | -1.01 | 8.91E-01 | 9.18E-01 | 144.45   | not significant |
| 5770 | TCF7L2     | -1.01 | 8.47E-01 | 8.85E-01 | 435.45   | not significant |
| 5771 | HEATR5A    | -1.01 | 8.71E-01 | 9.03E-01 | 276.35   | not significant |
| 5772 | RBMXL2     | -1.01 | 8.54E-01 | 8.91E-01 | 8.59     | not significant |
| 5773 | HIST1H3D   | -1.01 | 8.92E-01 | 9.19E-01 | 26.44    | not significant |
| 5774 | BBS5       | -1.01 | 8.86E-01 | 9.14E-01 | 210.29   | not significant |
| 5775 | PPP6C      | -1.01 | 7.09E-01 | 7.72E-01 | 3513.85  | not significant |
| 5776 | AZIN1      | -1.01 | 5.83E-01 | 6.65E-01 | 15959.22 | not significant |
| 5777 | ZNF137P    | -1.01 | 8.68E-01 | 9.01E-01 | 323.37   | not significant |
| 5778 | EXOC6      | -1.01 | 7.94E-01 | 8.43E-01 | 1113.59  | not significant |
| 5779 | ITPK1      | -1.01 | 7.45E-01 | 8.02E-01 | 2482.54  | not significant |
| 5780 | IGF2BP3    | -1.01 | 8.96E-01 | 9.21E-01 | 28.46    | not significant |
| 5781 | PPP1R11    | -1.01 | 8.95E-01 | 9.21E-01 | 165.10   | not significant |
| 5782 | CENPBD1    | -1.01 | 8.77E-01 | 9.07E-01 | 284.59   | not significant |
| 5783 | MGAT3      | -1.01 | 8.96E-01 | 9.21E-01 | 27.22    | not significant |
| 5784 | SATB1      | -1.01 | 7.42E-01 | 8.00E-01 | 2314.30  | not significant |
| 5785 | PITRM1-AS1 | -1.01 | 9.01E-01 | 9.25E-01 | 36.61    | not significant |
| 5786 | TLN2       | -1.01 | 9.02E-01 | 9.25E-01 | 94.65    | not significant |
| 5787 | ATXN1L     | -1.01 | 7.32E-01 | 7.92E-01 | 2867.69  | not significant |
| 5788 | MAFK       | -1.01 | 7.24E-01 | 7.86E-01 | 2904.44  | not significant |
| 5789 | XRCC6BP1   | -1.01 | 8.68E-01 | 9.01E-01 | 353.76   | not significant |
| 5790 | SMARCAD1   | -1.01 | 7.12E-01 | 7.75E-01 | 4162.67  | not significant |
| 5791 | ZNF257     | -1.01 | 8.90E-01 | 9.17E-01 | 180.83   | not significant |
| 5792 | NUP214     | -1.01 | 8.68E-01 | 9.01E-01 | 3065.32  | not significant |
| 5793 | GOLGA2     | -1.01 | 7.71E-01 | 8.24E-01 | 1740.11  | not significant |
| 5794 | YY2        | -1.01 | 9.02E-01 | 9.26E-01 | 118.22   | not significant |
| 5795 | DEPDC4     | -1.01 | 9.07E-01 | 9.30E-01 | 48.97    | not significant |
| 5796 | POU4F1     | -1.01 | 9.00E-01 | 9.24E-01 | 27.80    | not significant |

|      |               |       |          |          |          |                 |
|------|---------------|-------|----------|----------|----------|-----------------|
| 5797 | ARID2         | -1.01 | 7.39E-01 | 7.98E-01 | 4507.41  | not significant |
| 5798 | GPN1          | -1.01 | 7.75E-01 | 8.27E-01 | 1667.38  | not significant |
| 5799 | MUSTN1        | -1.01 | 8.92E-01 | 9.19E-01 | 18.84    | not significant |
| 5800 | SMARCA4       | -1.01 | 7.38E-01 | 7.97E-01 | 14073.12 | not significant |
| 5801 | ARL6IP6       | -1.01 | 7.73E-01 | 8.25E-01 | 2541.65  | not significant |
| 5802 | PTPN14        | -1.01 | 8.95E-01 | 9.21E-01 | 200.46   | not significant |
| 5803 | MDM1          | -1.01 | 7.82E-01 | 8.32E-01 | 1538.52  | not significant |
| 5804 | MRPS35        | -1.01 | 7.60E-01 | 8.14E-01 | 2793.17  | not significant |
| 5805 | HMCES         | -1.01 | 7.76E-01 | 8.28E-01 | 2901.29  | not significant |
| 5806 | KRTCAP3       | -1.01 | 8.95E-01 | 9.21E-01 | 18.04    | not significant |
| 5807 | C11orf58      | -1.01 | 7.09E-01 | 7.72E-01 | 5846.44  | not significant |
| 5808 | SELPLG        | -1.01 | 7.25E-01 | 7.86E-01 | 5772.73  | not significant |
| 5809 | ZNF84         | -1.01 | 9.06E-01 | 9.29E-01 | 110.75   | not significant |
| 5810 | CYB561D1      | -1.01 | 8.55E-01 | 8.91E-01 | 595.36   | not significant |
| 5811 | EXOSC4        | -1.01 | 9.11E-01 | 9.33E-01 | 67.38    | not significant |
| 5812 | TP53TG1       | -1.01 | 8.93E-01 | 9.19E-01 | 253.48   | not significant |
| 5813 | FBXO42        | -1.01 | 8.20E-01 | 8.64E-01 | 1040.94  | not significant |
| 5814 | PXYLP1        | -1.01 | 7.54E-01 | 8.10E-01 | 3088.28  | not significant |
| 5815 | FUS           | -1.01 | 7.22E-01 | 7.84E-01 | 20406.32 | not significant |
| 5816 | NLGN2         | -1.01 | 8.58E-01 | 8.94E-01 | 595.91   | not significant |
| 5817 | RAC3          | -1.01 | 8.85E-01 | 9.14E-01 | 365.67   | not significant |
| 5818 | WASF2         | -1.01 | 7.12E-01 | 7.75E-01 | 8569.48  | not significant |
| 5819 | DBP           | -1.01 | 8.52E-01 | 8.89E-01 | 696.34   | not significant |
| 5820 | HNRNPF        | -1.01 | 7.08E-01 | 7.72E-01 | 22331.94 | not significant |
| 5821 | PWWP2B        | -1.01 | 8.80E-01 | 9.10E-01 | 452.33   | not significant |
| 5822 | PRDX6         | -1.01 | 7.30E-01 | 7.90E-01 | 5586.24  | not significant |
| 5823 | NMRK1         | -1.01 | 9.01E-01 | 9.25E-01 | 248.90   | not significant |
| 5824 | EMC7          | -1.01 | 8.44E-01 | 8.82E-01 | 952.29   | not significant |
| 5825 | SP4           | -1.01 | 7.98E-01 | 8.46E-01 | 2102.56  | not significant |
| 5826 | PM20D2        | -1.01 | 7.25E-01 | 7.87E-01 | 4766.94  | not significant |
| 5827 | HSF2BP        | -1.01 | 9.07E-01 | 9.30E-01 | 18.56    | not significant |
| 5828 | ITPKA         | -1.01 | 9.08E-01 | 9.30E-01 | 21.70    | not significant |
| 5829 | CD97          | -1.01 | 8.29E-01 | 8.71E-01 | 1887.42  | not significant |
| 5830 | KIAA0100      | -1.01 | 7.14E-01 | 7.77E-01 | 9395.56  | not significant |
| 5831 | IFT43         | -1.01 | 9.15E-01 | 9.35E-01 | 131.01   | not significant |
| 5832 | CUTA          | -1.01 | 8.09E-01 | 8.55E-01 | 1569.92  | not significant |
| 5833 | HAUS1         | -1.01 | 7.94E-01 | 8.43E-01 | 2115.45  | not significant |
| 5834 | DKFZP434I0714 | -1.01 | 9.10E-01 | 9.32E-01 | 227.61   | not significant |
| 5835 | MBOAT2        | -1.01 | 8.32E-01 | 8.73E-01 | 1368.41  | not significant |
| 5836 | KIF9          | -1.01 | 9.12E-01 | 9.33E-01 | 176.83   | not significant |
| 5837 | IST1          | -1.01 | 7.48E-01 | 8.05E-01 | 4218.78  | not significant |
| 5838 | ACAT2         | -1.01 | 7.85E-01 | 8.35E-01 | 3513.17  | not significant |
| 5839 | RUNX1         | -1.01 | 7.42E-01 | 8.00E-01 | 8879.31  | not significant |
| 5840 | HARS          | -1.01 | 7.96E-01 | 8.45E-01 | 2348.58  | not significant |
| 5841 | HOXB-AS1      | -1.01 | 9.23E-01 | 9.42E-01 | 40.60    | not significant |
| 5842 | FBXO5         | -1.01 | 7.91E-01 | 8.41E-01 | 2922.45  | not significant |
| 5843 | PAX8-AS1      | -1.01 | 8.44E-01 | 8.82E-01 | 1371.25  | not significant |
| 5844 | SAYSD1        | -1.01 | 8.71E-01 | 9.04E-01 | 636.03   | not significant |
| 5845 | LRRC17        | -1.01 | 9.05E-01 | 9.28E-01 | 12.92    | not significant |
| 5846 | WDR24         | -1.01 | 8.64E-01 | 8.98E-01 | 943.19   | not significant |
| 5847 | TEX10         | -1.01 | 8.54E-01 | 8.91E-01 | 1085.23  | not significant |
| 5848 | CCDC64        | -1.01 | 8.43E-01 | 8.81E-01 | 995.97   | not significant |
| 5849 | KLHDC1        | -1.01 | 9.24E-01 | 9.43E-01 | 45.82    | not significant |
| 5850 | MAN2B2        | -1.01 | 8.26E-01 | 8.68E-01 | 1639.67  | not significant |
| 5851 | TEX9          | -1.01 | 9.26E-01 | 9.44E-01 | 65.86    | not significant |
| 5852 | CD2AP         | -1.01 | 7.91E-01 | 8.40E-01 | 4227.68  | not significant |
| 5853 | LPAR2         | -1.01 | 9.14E-01 | 9.35E-01 | 277.57   | not significant |
| 5854 | ARHGAP23      | -1.01 | 9.05E-01 | 9.28E-01 | 266.99   | not significant |
| 5855 | ARL14EP       | -1.01 | 8.54E-01 | 8.91E-01 | 1026.14  | not significant |
| 5856 | TMEM134       | -1.01 | 8.71E-01 | 9.04E-01 | 735.29   | not significant |
| 5857 | ZNF616        | -1.01 | 8.78E-01 | 9.08E-01 | 641.13   | not significant |
| 5858 | SCARNA10      | -1.01 | 9.04E-01 | 9.27E-01 | 11.81    | not significant |
| 5859 | ACTR10        | -1.01 | 8.53E-01 | 8.90E-01 | 1114.45  | not significant |
| 5860 | PYROXD2       | -1.01 | 9.21E-01 | 9.41E-01 | 163.38   | not significant |
| 5861 | POU2AF1       | -1.01 | 8.74E-01 | 9.05E-01 | 746.60   | not significant |
| 5862 | SACS          | -1.01 | 8.87E-01 | 9.15E-01 | 5801.67  | not significant |
| 5863 | MYNN          | -1.01 | 8.67E-01 | 9.00E-01 | 852.38   | not significant |
| 5864 | NMRAL1        | -1.01 | 8.02E-01 | 8.49E-01 | 3140.83  | not significant |
| 5865 | C16orf87      | -1.01 | 8.93E-01 | 9.19E-01 | 550.05   | not significant |
| 5866 | N4BP1         | -1.01 | 8.25E-01 | 8.67E-01 | 1914.74  | not significant |
| 5867 | USP38         | -1.01 | 8.25E-01 | 8.67E-01 | 2087.86  | not significant |
| 5868 | ARNTL         | -1.01 | 9.01E-01 | 9.25E-01 | 479.35   | not significant |
| 5869 | ZNF182        | -1.01 | 9.29E-01 | 9.47E-01 | 31.13    | not significant |
| 5870 | ZNF596        | -1.01 | 9.24E-01 | 9.43E-01 | 170.19   | not significant |
| 5871 | CMPK1         | -1.01 | 8.00E-01 | 8.48E-01 | 5141.03  | not significant |
| 5872 | BTD           | -1.01 | 9.25E-01 | 9.44E-01 | 165.61   | not significant |
| 5873 | SNX22         | -1.01 | 9.19E-01 | 9.39E-01 | 84.86    | not significant |
| 5874 | CASZ1         | -1.01 | 9.00E-01 | 9.24E-01 | 423.37   | not significant |
| 5875 | NECAP1        | -1.01 | 8.95E-01 | 9.21E-01 | 737.16   | not significant |
| 5876 | WRAP73        | -1.01 | 8.75E-01 | 9.06E-01 | 1140.44  | not significant |
| 5877 | ALOX15P1      | -1.01 | 9.32E-01 | 9.49E-01 | 23.63    | not significant |
| 5878 | HMGCR         | -1.01 | 7.84E-01 | 8.35E-01 | 7015.20  | not significant |
| 5879 | IQCH          | -1.01 | 9.38E-01 | 9.52E-01 | 42.91    | not significant |
| 5880 | ZNF416        | -1.01 | 9.20E-01 | 9.39E-01 | 290.96   | not significant |
| 5881 | WDR83OS       | -1.01 | 8.69E-01 | 9.01E-01 | 1493.87  | not significant |
| 5882 | ADAM9         | -1.01 | 8.89E-01 | 9.16E-01 | 829.17   | not significant |
| 5883 | DGCR6L        | -1.01 | 8.95E-01 | 9.21E-01 | 652.62   | not significant |
| 5884 | AP2A2         | -1.01 | 8.55E-01 | 8.91E-01 | 1678.65  | not significant |

|      |              |       |          |          |          |                 |
|------|--------------|-------|----------|----------|----------|-----------------|
| 5885 | MIPEPP3      | -1.01 | 9.40E-01 | 9.54E-01 | 62.59    | not significant |
| 5886 | ABH1         | -1.01 | 8.31E-01 | 8.72E-01 | 2678.40  | not significant |
| 5887 | VWCE         | -1.01 | 9.28E-01 | 9.46E-01 | 226.45   | not significant |
| 5888 | LOC100652758 | -1.01 | 9.37E-01 | 9.52E-01 | 28.95    | not significant |
| 5889 | THAP8        | -1.01 | 9.29E-01 | 9.47E-01 | 248.12   | not significant |
| 5890 | NCOR2        | -1.01 | 8.06E-01 | 8.52E-01 | 7874.50  | not significant |
| 5891 | ANKRD42      | -1.01 | 9.41E-01 | 9.55E-01 | 71.39    | not significant |
| 5892 | USP28        | -1.01 | 8.75E-01 | 9.06E-01 | 1303.20  | not significant |
| 5893 | CENPBD1P1    | -1.01 | 8.81E-01 | 9.10E-01 | 1101.55  | not significant |
| 5894 | COQ6         | -1.01 | 9.13E-01 | 9.34E-01 | 404.54   | not significant |
| 5895 | EXOSC5       | -1.01 | 9.02E-01 | 9.26E-01 | 675.11   | not significant |
| 5896 | ZNF638       | -1.01 | 8.16E-01 | 8.60E-01 | 3957.45  | not significant |
| 5897 | TCEAL8       | -1.01 | 8.58E-01 | 8.94E-01 | 1837.16  | not significant |
| 5898 | SLMO2        | -1.01 | 8.55E-01 | 8.91E-01 | 2510.79  | not significant |
| 5899 | MED24        | -1.01 | 8.30E-01 | 8.71E-01 | 4230.58  | not significant |
| 5900 | FAM172A      | -1.01 | 8.69E-01 | 9.01E-01 | 1538.96  | not significant |
| 5901 | CHRNA3       | -1.01 | 9.40E-01 | 9.54E-01 | 27.34    | not significant |
| 5902 | ATP6V0E1     | -1.01 | 8.64E-01 | 8.98E-01 | 221.68   | not significant |
| 5903 | TOR1B        | -1.01 | 8.83E-01 | 9.12E-01 | 1053.33  | not significant |
| 5904 | TBCD         | -1.01 | 7.79E-01 | 8.30E-01 | 9692.97  | not significant |
| 5905 | ENSA         | -1.01 | 8.35E-01 | 8.75E-01 | 6465.51  | not significant |
| 5906 | KREMEN2      | -1.01 | 9.38E-01 | 9.53E-01 | 19.53    | not significant |
| 5907 | FARS2        | -1.01 | 9.17E-01 | 9.37E-01 | 481.83   | not significant |
| 5908 | LARP7        | -1.01 | 8.55E-01 | 8.91E-01 | 2244.04  | not significant |
| 5909 | TATDN3       | -1.01 | 8.95E-01 | 9.21E-01 | 956.36   | not significant |
| 5910 | UPF3B        | -1.00 | 8.85E-01 | 9.13E-01 | 1415.44  | not significant |
| 5911 | RSL1D1       | -1.00 | 8.42E-01 | 8.80E-01 | 7849.12  | not significant |
| 5912 | MAPK13       | -1.00 | 9.47E-01 | 9.60E-01 | 75.14    | not significant |
| 5913 | LTN1         | -1.00 | 8.98E-01 | 9.22E-01 | 1937.95  | not significant |
| 5914 | RAB28        | -1.00 | 8.98E-01 | 9.22E-01 | 1117.00  | not significant |
| 5915 | CHD4         | -1.00 | 8.43E-01 | 8.81E-01 | 18782.07 | not significant |
| 5916 | NSUN4        | -1.00 | 8.88E-01 | 9.15E-01 | 1558.96  | not significant |
| 5917 | DCAF11       | -1.00 | 8.59E-01 | 8.95E-01 | 4242.17  | not significant |
| 5918 | MAST4        | -1.00 | 9.14E-01 | 9.35E-01 | 1024.29  | not significant |
| 5919 | CHCHD5       | -1.00 | 9.51E-01 | 9.63E-01 | 115.88   | not significant |
| 5920 | STARD3NL     | -1.00 | 8.85E-01 | 9.13E-01 | 2490.45  | not significant |
| 5921 | PLD3         | -1.00 | 9.02E-01 | 9.25E-01 | 1207.15  | not significant |
| 5922 | CBWD6        | -1.00 | 9.50E-01 | 9.63E-01 | 27.93    | not significant |
| 5923 | SRRM5        | -1.00 | 9.45E-01 | 9.58E-01 | 18.60    | not significant |
| 5924 | KIAA0922     | -1.00 | 8.54E-01 | 8.91E-01 | 4826.56  | not significant |
| 5925 | UBFD1        | -1.00 | 8.62E-01 | 8.97E-01 | 3921.50  | not significant |
| 5926 | MRPS22       | -1.00 | 9.15E-01 | 9.36E-01 | 947.48   | not significant |
| 5927 | RNF2         | -1.00 | 9.02E-01 | 9.25E-01 | 1398.43  | not significant |
| 5928 | VPS13A       | -1.00 | 8.90E-01 | 9.17E-01 | 3210.00  | not significant |
| 5929 | 43711_25571  | -1.00 | 9.56E-01 | 9.67E-01 | 49.84    | not significant |
| 5930 | SLC12A7      | -1.00 | 8.97E-01 | 9.22E-01 | 1819.33  | not significant |
| 5931 | ZNF567       | -1.00 | 9.26E-01 | 9.45E-01 | 619.21   | not significant |
| 5932 | SCAF8        | -1.00 | 8.61E-01 | 8.96E-01 | 3478.45  | not significant |
| 5933 | SMC3         | -1.00 | 8.62E-01 | 8.97E-01 | 7571.08  | not significant |
| 5934 | LIMK2        | -1.00 | 8.96E-01 | 9.21E-01 | 1700.80  | not significant |
| 5935 | LTB4R2       | -1.00 | 9.57E-01 | 9.68E-01 | 87.02    | not significant |
| 5936 | TERC         | -1.00 | 9.34E-01 | 9.50E-01 | 7.60     | not significant |
| 5937 | HERC4        | -1.00 | 9.02E-01 | 9.26E-01 | 1573.55  | not significant |
| 5938 | GTF2H4       | -1.00 | 9.28E-01 | 9.46E-01 | 620.09   | not significant |
| 5939 | SARS2        | -1.00 | 9.23E-01 | 9.43E-01 | 768.51   | not significant |
| 5940 | AMN          | -1.00 | 9.49E-01 | 9.62E-01 | 227.03   | not significant |
| 5941 | ZNF329       | -1.00 | 9.33E-01 | 9.50E-01 | 674.69   | not significant |
| 5942 | C18orf8      | -1.00 | 9.13E-01 | 9.34E-01 | 1165.63  | not significant |
| 5943 | NDUFS2       | -1.00 | 8.95E-01 | 9.21E-01 | 2180.41  | not significant |
| 5944 | PNRC2        | -1.00 | 9.31E-01 | 9.48E-01 | 632.38   | not significant |
| 5945 | LTA          | -1.00 | 9.59E-01 | 9.69E-01 | 81.26    | not significant |
| 5946 | RAB44        | -1.00 | 9.57E-01 | 9.68E-01 | 162.48   | not significant |
| 5947 | MKL1         | -1.00 | 8.95E-01 | 9.21E-01 | 2231.62  | not significant |
| 5948 | NUCB1        | -1.00 | 8.73E-01 | 9.05E-01 | 5102.45  | not significant |
| 5949 | RGL4         | -1.00 | 9.22E-01 | 9.41E-01 | 1071.40  | not significant |
| 5950 | RBAK         | -1.00 | 9.26E-01 | 9.44E-01 | 1232.93  | not significant |
| 5951 | FASTK        | -1.00 | 9.17E-01 | 9.38E-01 | 1692.87  | not significant |
| 5952 | FBXO34       | -1.00 | 9.15E-01 | 9.36E-01 | 1477.39  | not significant |
| 5953 | LEPREL4      | -1.00 | 9.48E-01 | 9.61E-01 | 10.58    | not significant |
| 5954 | RSAD1        | -1.00 | 9.08E-01 | 9.30E-01 | 1720.24  | not significant |
| 5955 | TXNDC5       | -1.00 | 9.61E-01 | 9.71E-01 | 45.99    | not significant |
| 5956 | ERO1L        | -1.00 | 8.95E-01 | 9.21E-01 | 4389.05  | not significant |
| 5957 | TNRC6A       | -1.00 | 8.96E-01 | 9.21E-01 | 2624.15  | not significant |
| 5958 | CYP4V2       | -1.00 | 9.24E-01 | 9.44E-01 | 1056.87  | not significant |
| 5959 | TMEM179B     | -1.00 | 9.38E-01 | 9.52E-01 | 694.04   | not significant |
| 5960 | SKIV2L       | -1.00 | 9.40E-01 | 9.54E-01 | 687.32   | not significant |
| 5961 | PRDM2        | -1.00 | 9.32E-01 | 9.49E-01 | 1184.34  | not significant |
| 5962 | NFIX         | -1.00 | 9.26E-01 | 9.44E-01 | 1277.92  | not significant |
| 5963 | SLC25A13     | -1.00 | 9.47E-01 | 9.60E-01 | 545.05   | not significant |
| 5964 | DNAJB14      | -1.00 | 9.15E-01 | 9.35E-01 | 2498.71  | not significant |
| 5965 | RASA1        | -1.00 | 9.39E-01 | 9.53E-01 | 919.03   | not significant |
| 5966 | PBDC1        | -1.00 | 9.66E-01 | 9.74E-01 | 148.62   | not significant |
| 5967 | YTHDF3       | -1.00 | 9.19E-01 | 9.39E-01 | 2412.65  | not significant |
| 5968 | IFRD1        | -1.00 | 9.34E-01 | 9.50E-01 | 1082.17  | not significant |
| 5969 | EIF1         | -1.00 | 9.09E-01 | 9.31E-01 | 21677.99 | not significant |
| 5970 | CDK12        | -1.00 | 9.18E-01 | 9.38E-01 | 4393.32  | not significant |
| 5971 | RPL13P5      | -1.00 | 9.58E-01 | 9.68E-01 | 8.78     | not significant |
| 5972 | C7orf25      | -1.00 | 9.61E-01 | 9.70E-01 | 330.16   | not significant |

|      |              |       |          |          |           |                 |
|------|--------------|-------|----------|----------|-----------|-----------------|
| 5973 | WDR11        | -1.00 | 9.35E-01 | 9.51E-01 | 1435.85   | not significant |
| 5974 | PIKFYVE      | -1.00 | 9.08E-01 | 9.30E-01 | 5786.59   | not significant |
| 5975 | LINC00565    | -1.00 | 9.64E-01 | 9.73E-01 | 13.36     | not significant |
| 5976 | ZNF668       | -1.00 | 9.55E-01 | 9.66E-01 | 805.58    | not significant |
| 5977 | PPIP5K2      | -1.00 | 9.36E-01 | 9.52E-01 | 1518.15   | not significant |
| 5978 | LOC399715    | -1.00 | 9.68E-01 | 9.76E-01 | 19.44     | not significant |
| 5979 | SLC39A4      | -1.00 | 9.72E-01 | 9.79E-01 | 105.85    | not significant |
| 5980 | SLC30A9      | -1.00 | 9.33E-01 | 9.50E-01 | 2335.94   | not significant |
| 5981 | SGK2         | -1.00 | 9.65E-01 | 9.73E-01 | 12.53     | not significant |
| 5982 | DCP1B        | -1.00 | 9.60E-01 | 9.70E-01 | 492.59    | not significant |
| 5983 | REEP6        | -1.00 | 9.73E-01 | 9.80E-01 | 41.58     | not significant |
| 5984 | KANSL2       | -1.00 | 9.32E-01 | 9.49E-01 | 2225.66   | not significant |
| 5985 | NMT1         | -1.00 | 9.14E-01 | 9.35E-01 | 5897.74   | not significant |
| 5986 | SPATA13      | -1.00 | 9.33E-01 | 9.50E-01 | 3585.80   | not significant |
| 5987 | LINC00539    | -1.00 | 9.73E-01 | 9.80E-01 | 28.55     | not significant |
| 5988 | MYH3         | -1.00 | 9.75E-01 | 9.81E-01 | 121.02    | not significant |
| 5989 | IER3IP1      | -1.00 | 9.36E-01 | 9.52E-01 | 1877.90   | not significant |
| 5990 | TTC39C       | -1.00 | 9.58E-01 | 9.69E-01 | 741.19    | not significant |
| 5991 | TRANK1       | -1.00 | 9.43E-01 | 9.57E-01 | 2148.17   | not significant |
| 5992 | MOK          | -1.00 | 9.68E-01 | 9.76E-01 | 10.56     | not significant |
| 5993 | HM13         | -1.00 | 9.32E-01 | 9.49E-01 | 4813.98   | not significant |
| 5994 | C19orf25     | -1.00 | 9.58E-01 | 9.69E-01 | 818.63    | not significant |
| 5995 | JOSD2        | -1.00 | 9.71E-01 | 9.78E-01 | 291.92    | not significant |
| 5996 | WBP11P1      | -1.00 | 9.70E-01 | 9.77E-01 | 10.89     | not significant |
| 5997 | SDHD         | -1.00 | 9.44E-01 | 9.57E-01 | 3315.50   | not significant |
| 5998 | POLG         | -1.00 | 9.33E-01 | 9.50E-01 | 4889.94   | not significant |
| 5999 | EP400NL      | -1.00 | 9.72E-01 | 9.79E-01 | 327.19    | not significant |
| 6000 | PSMD4        | -1.00 | 9.45E-01 | 9.58E-01 | 3685.58   | not significant |
| 6001 | FGFBP3       | -1.00 | 9.79E-01 | 9.84E-01 | 74.65     | not significant |
| 6002 | MED14OS      | -1.00 | 9.69E-01 | 9.76E-01 | 8.80      | not significant |
| 6003 | TSG101       | -1.00 | 9.53E-01 | 9.65E-01 | 1603.23   | not significant |
| 6004 | TATDN1       | -1.00 | 9.68E-01 | 9.76E-01 | 630.80    | not significant |
| 6005 | ATP2B1       | -1.00 | 9.54E-01 | 9.66E-01 | 2332.55   | not significant |
| 6006 | LCK          | -1.00 | 9.40E-01 | 9.54E-01 | 22340.72  | not significant |
| 6007 | ZNF142       | -1.00 | 9.60E-01 | 9.70E-01 | 1953.35   | not significant |
| 6008 | UBL3         | -1.00 | 9.63E-01 | 9.72E-01 | 1057.83   | not significant |
| 6009 | PTPDC1       | -1.00 | 9.73E-01 | 9.79E-01 | 422.74    | not significant |
| 6010 | LOC101929715 | -1.00 | 9.73E-01 | 9.79E-01 | 8.49      | not significant |
| 6011 | CTSA         | -1.00 | 9.56E-01 | 9.67E-01 | 2249.96   | not significant |
| 6012 | TNFSF12      | -1.00 | 9.76E-01 | 9.82E-01 | 12.32     | not significant |
| 6013 | CSRP2        | -1.00 | 9.77E-01 | 9.83E-01 | 14.21     | not significant |
| 6014 | CCT6B        | -1.00 | 9.71E-01 | 9.78E-01 | 9.75      | not significant |
| 6015 | CBFB         | -1.00 | 9.45E-01 | 9.58E-01 | 10115.85  | not significant |
| 6016 | POLR2M       | -1.00 | 9.82E-01 | 9.87E-01 | 95.79     | not significant |
| 6017 | ARSK         | -1.00 | 9.76E-01 | 9.82E-01 | 502.19    | not significant |
| 6018 | HIATL1       | -1.00 | 9.61E-01 | 9.71E-01 | 3494.43   | not significant |
| 6019 | CEACAM1      | -1.00 | 9.80E-01 | 9.85E-01 | 48.03     | not significant |
| 6020 | ATF6         | -1.00 | 9.53E-01 | 9.65E-01 | 3424.55   | not significant |
| 6021 | FBF1         | -1.00 | 9.70E-01 | 9.78E-01 | 1113.01   | not significant |
| 6022 | GAPDH        | -1.00 | 9.86E-01 | 9.90E-01 | 189970.30 | not significant |
| 6023 | RAD17        | -1.00 | 9.64E-01 | 9.73E-01 | 1111.55   | not significant |
| 6024 | CACTIN-AS1   | -1.00 | 9.83E-01 | 9.87E-01 | 15.19     | not significant |
| 6025 | AARS2        | -1.00 | 9.72E-01 | 9.79E-01 | 1741.64   | not significant |
| 6026 | RINT1        | -1.00 | 9.79E-01 | 9.84E-01 | 1160.12   | not significant |
| 6027 | ASCC1        | -1.00 | 9.76E-01 | 9.82E-01 | 1063.50   | not significant |
| 6028 | LOC100506023 | -1.00 | 9.87E-01 | 9.91E-01 | 33.67     | not significant |
| 6029 | TOX4         | -1.00 | 9.69E-01 | 9.76E-01 | 2917.47   | not significant |
| 6030 | CYB561D2     | -1.00 | 9.85E-01 | 9.89E-01 | 552.04    | not significant |
| 6031 | EEA1         | -1.00 | 9.75E-01 | 9.81E-01 | 1690.10   | not significant |
| 6032 | KSR1         | -1.00 | 9.90E-01 | 9.92E-01 | 153.42    | not significant |
| 6033 | SLC25A34     | -1.00 | 9.90E-01 | 9.92E-01 | 32.28     | not significant |
| 6034 | BLOC1S4      | -1.00 | 9.88E-01 | 9.91E-01 | 522.58    | not significant |
| 6035 | SCP2         | -1.00 | 9.81E-01 | 9.86E-01 | 3483.17   | not significant |
| 6036 | WDR78        | -1.00 | 9.90E-01 | 9.92E-01 | 12.62     | not significant |
| 6037 | NT5C2        | -1.00 | 9.80E-01 | 9.85E-01 | 3623.23   | not significant |
| 6038 | GRSF1        | -1.00 | 9.75E-01 | 9.81E-01 | 9593.21   | not significant |
| 6039 | MPHOSPH9     | -1.00 | 9.75E-01 | 9.81E-01 | 3892.11   | not significant |
| 6040 | SIX3-AS1     | -1.00 | 9.92E-01 | 9.94E-01 | 45.48     | not significant |
| 6041 | PER3         | -1.00 | 9.93E-01 | 9.95E-01 | 20.91     | not significant |
| 6042 | ZNF561-AS1   | -1.00 | 9.94E-01 | 9.96E-01 | 98.91     | not significant |
| 6043 | SLC16A3      | -1.00 | 9.93E-01 | 9.95E-01 | 503.26    | not significant |
| 6044 | TGIF2        | -1.00 | 9.90E-01 | 9.92E-01 | 1957.32   | not significant |
| 6045 | NXPE3        | -1.00 | 9.92E-01 | 9.95E-01 | 2703.71   | not significant |
| 6046 | BLVRA        | -1.00 | 9.94E-01 | 9.96E-01 | 1037.60   | not significant |
| 6047 | ZBTB38       | -1.00 | 9.96E-01 | 9.97E-01 | 27.31     | not significant |
| 6048 | PTPMT1       | -1.00 | 9.89E-01 | 9.92E-01 | 1526.67   | not significant |
| 6049 | SQRDL        | -1.00 | 1.00E+00 | 1.00E+00 | 822.44    | not significant |
| 6050 | PAFAH1B1     | -1.00 | 9.94E-01 | 9.95E-01 | 7874.65   | not significant |
| 6051 | THUMPDI      | -1.00 | 9.95E-01 | 9.96E-01 | 3289.34   | not significant |
| 6052 | CIT          | -1.00 | 9.97E-01 | 9.98E-01 | 6202.43   | not significant |
| 6053 | CMTR1        | -1.00 | 9.97E-01 | 9.98E-01 | 4343.41   | not significant |
| 6054 | KLF6         | 1.00  | 9.94E-01 | 9.96E-01 | 3690.75   | not significant |
| 6055 | C19orf12     | 1.00  | 9.93E-01 | 9.95E-01 | 772.45    | not significant |
| 6056 | MYO5C        | 1.00  | 9.99E-01 | 9.99E-01 | 184.75    | not significant |
| 6057 | GHDC         | 1.00  | 9.99E-01 | 9.99E-01 | 654.60    | not significant |
| 6058 | SMIM13       | 1.00  | 9.98E-01 | 9.99E-01 | 1021.96   | not significant |
| 6059 | SETD1A       | 1.00  | 9.95E-01 | 9.96E-01 | 3773.08   | not significant |
| 6060 | LYG1         | 1.00  | 9.99E-01 | 9.99E-01 | 54.65     | not significant |

|      |              |      |          |          |          |                 |
|------|--------------|------|----------|----------|----------|-----------------|
| 6061 | FBXL3        | 1.00 | 9.95E-01 | 9.96E-01 | 2546.28  | not significant |
| 6062 | ATP6AP2      | 1.00 | 9.94E-01 | 9.95E-01 | 2553.52  | not significant |
| 6063 | UGCG         | 1.00 | 9.95E-01 | 9.96E-01 | 514.98   | not significant |
| 6064 | CSDE1        | 1.00 | 9.96E-01 | 9.97E-01 | 23782.02 | not significant |
| 6065 | INSL3        | 1.00 | 9.97E-01 | 9.97E-01 | 11.03    | not significant |
| 6066 | RALGDS       | 1.00 | 9.90E-01 | 9.93E-01 | 2044.25  | not significant |
| 6067 | FGFR1OP      | 1.00 | 9.92E-01 | 9.94E-01 | 1267.20  | not significant |
| 6068 | PDCD2        | 1.00 | 9.89E-01 | 9.92E-01 | 3182.38  | not significant |
| 6069 | ERI1         | 1.00 | 9.90E-01 | 9.93E-01 | 2411.05  | not significant |
| 6070 | TCP11L2      | 1.00 | 9.97E-01 | 9.97E-01 | 30.91    | not significant |
| 6071 | PTPRA        | 1.00 | 9.84E-01 | 9.88E-01 | 5534.23  | not significant |
| 6072 | PRPS2        | 1.00 | 9.83E-01 | 9.87E-01 | 4205.29  | not significant |
| 6073 | SLC35B3      | 1.00 | 9.93E-01 | 9.95E-01 | 347.69   | not significant |
| 6074 | CCDC97       | 1.00 | 9.85E-01 | 9.89E-01 | 2326.74  | not significant |
| 6075 | BDP1         | 1.00 | 9.88E-01 | 9.91E-01 | 1078.57  | not significant |
| 6076 | SPSB2        | 1.00 | 9.94E-01 | 9.95E-01 | 16.91    | not significant |
| 6077 | ING2         | 1.00 | 9.89E-01 | 9.92E-01 | 590.62   | not significant |
| 6078 | SPTAN1       | 1.00 | 9.95E-01 | 9.96E-01 | 12316.86 | not significant |
| 6079 | TAF4B        | 1.00 | 9.69E-01 | 9.76E-01 | 1678.74  | not significant |
| 6080 | PRKAR2A      | 1.00 | 9.78E-01 | 9.84E-01 | 818.35   | not significant |
| 6081 | PRR34        | 1.00 | 9.90E-01 | 9.93E-01 | 15.17    | not significant |
| 6082 | NIM1K        | 1.00 | 9.88E-01 | 9.91E-01 | 8.65     | not significant |
| 6083 | PDLIM2       | 1.00 | 9.82E-01 | 9.86E-01 | 1040.31  | not significant |
| 6084 | SIVA1        | 1.00 | 9.72E-01 | 9.79E-01 | 3692.96  | not significant |
| 6085 | ARMC10       | 1.00 | 9.78E-01 | 9.84E-01 | 1584.88  | not significant |
| 6086 | ARSB         | 1.00 | 9.77E-01 | 9.83E-01 | 1435.06  | not significant |
| 6087 | RBMS1        | 1.00 | 9.70E-01 | 9.77E-01 | 2959.75  | not significant |
| 6088 | AGBL3        | 1.00 | 9.93E-01 | 9.95E-01 | 33.00    | not significant |
| 6089 | TMPO         | 1.00 | 9.59E-01 | 9.69E-01 | 38427.56 | not significant |
| 6090 | FAM185A      | 1.00 | 9.87E-01 | 9.91E-01 | 203.10   | not significant |
| 6091 | NDUFB2-AS1   | 1.00 | 9.89E-01 | 9.92E-01 | 32.86    | not significant |
| 6092 | OCIAD1       | 1.00 | 9.62E-01 | 9.71E-01 | 5381.41  | not significant |
| 6093 | ZNF276       | 1.00 | 9.86E-01 | 9.90E-01 | 2023.73  | not significant |
| 6094 | YY1AP1       | 1.00 | 9.63E-01 | 9.72E-01 | 2520.83  | not significant |
| 6095 | CAPG         | 1.00 | 9.60E-01 | 9.70E-01 | 3651.48  | not significant |
| 6096 | IMPA2        | 1.00 | 9.86E-01 | 9.90E-01 | 24.91    | not significant |
| 6097 | LOC100294362 | 1.00 | 9.83E-01 | 9.87E-01 | 14.20    | not significant |
| 6098 | PAN2         | 1.00 | 9.81E-01 | 9.85E-01 | 2932.42  | not significant |
| 6099 | NAGK         | 1.00 | 9.74E-01 | 9.80E-01 | 634.88   | not significant |
| 6100 | SUFU         | 1.00 | 9.65E-01 | 9.73E-01 | 1257.47  | not significant |
| 6101 | TERT         | 1.00 | 9.82E-01 | 9.87E-01 | 198.97   | not significant |
| 6102 | TMX1         | 1.00 | 9.49E-01 | 9.62E-01 | 4666.93  | not significant |
| 6103 | SGSM3        | 1.00 | 9.62E-01 | 9.71E-01 | 2258.20  | not significant |
| 6104 | UVRAG        | 1.00 | 9.61E-01 | 9.71E-01 | 1250.99  | not significant |
| 6105 | NCBP2-AS2    | 1.00 | 9.59E-01 | 9.69E-01 | 802.72   | not significant |
| 6106 | HOMEZ        | 1.00 | 9.77E-01 | 9.83E-01 | 398.56   | not significant |
| 6107 | CEBPB-AS1    | 1.00 | 9.79E-01 | 9.84E-01 | 25.55    | not significant |
| 6108 | TMEM258      | 1.00 | 9.57E-01 | 9.68E-01 | 1481.36  | not significant |
| 6109 | KCNIP2       | 1.00 | 9.79E-01 | 9.84E-01 | 31.83    | not significant |
| 6110 | SAMD8        | 1.00 | 9.55E-01 | 9.66E-01 | 819.56   | not significant |
| 6111 | ORMDL3       | 1.00 | 9.34E-01 | 9.50E-01 | 6900.61  | not significant |
| 6112 | TYRO3        | 1.00 | 9.63E-01 | 9.72E-01 | 634.51   | not significant |
| 6113 | SLC25A10     | 1.00 | 9.52E-01 | 9.64E-01 | 1542.21  | not significant |
| 6114 | SLX4IP       | 1.00 | 9.70E-01 | 9.77E-01 | 193.94   | not significant |
| 6115 | CBX1         | 1.00 | 9.37E-01 | 9.52E-01 | 10184.21 | not significant |
| 6116 | PHF14        | 1.00 | 9.22E-01 | 9.41E-01 | 3606.20  | not significant |
| 6117 | SVIL         | 1.00 | 9.49E-01 | 9.62E-01 | 826.79   | not significant |
| 6118 | KCMF1        | 1.00 | 9.27E-01 | 9.45E-01 | 1985.69  | not significant |
| 6119 | KIF1C        | 1.00 | 9.38E-01 | 9.52E-01 | 1767.00  | not significant |
| 6120 | STX18-AS1    | 1.00 | 9.74E-01 | 9.80E-01 | 96.19    | not significant |
| 6121 | GUSBP4       | 1.00 | 9.70E-01 | 9.77E-01 | 220.17   | not significant |
| 6122 | DNAJB12      | 1.00 | 9.38E-01 | 9.53E-01 | 1504.63  | not significant |
| 6123 | PJA1         | 1.00 | 9.67E-01 | 9.75E-01 | 271.68   | not significant |
| 6124 | NUDCD3       | 1.00 | 9.21E-01 | 9.41E-01 | 2677.46  | not significant |
| 6125 | LOC100129083 | 1.00 | 9.63E-01 | 9.72E-01 | 11.15    | not significant |
| 6126 | CTNNB1       | 1.00 | 9.10E-01 | 9.32E-01 | 4058.18  | not significant |
| 6127 | KCNMB3       | 1.00 | 9.66E-01 | 9.75E-01 | 17.22    | not significant |
| 6128 | PRUNE        | 1.00 | 9.34E-01 | 9.50E-01 | 1323.19  | not significant |
| 6129 | KIAA1279     | 1.00 | 9.46E-01 | 9.59E-01 | 741.36   | not significant |
| 6130 | BECN1        | 1.00 | 9.15E-01 | 9.36E-01 | 2303.47  | not significant |
| 6131 | SURF2        | 1.00 | 9.64E-01 | 9.73E-01 | 179.58   | not significant |
| 6132 | ZNF35        | 1.00 | 9.60E-01 | 9.70E-01 | 13.43    | not significant |
| 6133 | AVL9         | 1.00 | 9.49E-01 | 9.62E-01 | 814.29   | not significant |
| 6134 | CTBP1-AS2    | 1.00 | 9.36E-01 | 9.52E-01 | 883.51   | not significant |
| 6135 | LRP5         | 1.00 | 9.41E-01 | 9.55E-01 | 730.22   | not significant |
| 6136 | DUSP22       | 1.00 | 9.34E-01 | 9.50E-01 | 1029.24  | not significant |
| 6137 | PAX6         | 1.00 | 9.54E-01 | 9.65E-01 | 9.62     | not significant |
| 6138 | LOC100996351 | 1.00 | 9.60E-01 | 9.70E-01 | 17.45    | not significant |
| 6139 | CKAP2L       | 1.00 | 8.95E-01 | 9.21E-01 | 3104.15  | not significant |
| 6140 | FBXW7        | 1.00 | 9.26E-01 | 9.44E-01 | 1311.12  | not significant |
| 6141 | TAF4         | 1.00 | 9.09E-01 | 9.31E-01 | 2274.19  | not significant |
| 6142 | AGO3         | 1.00 | 9.37E-01 | 9.52E-01 | 661.34   | not significant |
| 6143 | CLSPN        | 1.00 | 8.78E-01 | 9.08E-01 | 4744.17  | not significant |
| 6144 | CHN1         | 1.00 | 9.66E-01 | 9.74E-01 | 36.57    | not significant |
| 6145 | CCDC114      | 1.00 | 9.62E-01 | 9.71E-01 | 25.57    | not significant |
| 6146 | MIAT         | 1.00 | 9.62E-01 | 9.71E-01 | 144.35   | not significant |
| 6147 | FTO          | 1.00 | 9.04E-01 | 9.28E-01 | 2260.30  | not significant |
| 6148 | RNF24        | 1.00 | 9.09E-01 | 9.31E-01 | 1500.96  | not significant |

|      |              |      |          |          |          |                 |
|------|--------------|------|----------|----------|----------|-----------------|
| 6149 | LOC101060091 | 1.00 | 9.58E-01 | 9.69E-01 | 18.14    | not significant |
| 6150 | RDX          | 1.00 | 9.64E-01 | 9.73E-01 | 64.65    | not significant |
| 6151 | VPS13D       | 1.00 | 9.06E-01 | 9.29E-01 | 2416.34  | not significant |
| 6152 | ITFG3        | 1.00 | 9.22E-01 | 9.41E-01 | 954.56   | not significant |
| 6153 | CHAF1B       | 1.00 | 8.91E-01 | 9.18E-01 | 2555.19  | not significant |
| 6154 | LOC102606465 | 1.00 | 9.45E-01 | 9.59E-01 | 339.07   | not significant |
| 6155 | UPF1         | 1.00 | 8.65E-01 | 8.99E-01 | 10270.27 | not significant |
| 6156 | TCF20        | 1.00 | 9.58E-01 | 9.69E-01 | 121.05   | not significant |
| 6157 | BAG5         | 1.00 | 8.80E-01 | 9.10E-01 | 2886.73  | not significant |
| 6158 | LRTOMT       | 1.00 | 9.49E-01 | 9.62E-01 | 278.09   | not significant |
| 6159 | GGA3         | 1.00 | 8.80E-01 | 9.10E-01 | 4081.91  | not significant |
| 6160 | PDE1B        | 1.00 | 9.59E-01 | 9.69E-01 | 676.19   | not significant |
| 6161 | MAP7D1       | 1.00 | 8.51E-01 | 8.88E-01 | 6512.24  | not significant |
| 6162 | EAPP         | 1.00 | 9.09E-01 | 9.31E-01 | 1318.16  | not significant |
| 6163 | RFC3         | 1.00 | 8.64E-01 | 8.98E-01 | 3827.65  | not significant |
| 6164 | SPAG6        | 1.00 | 9.40E-01 | 9.54E-01 | 8.91     | not significant |
| 6165 | C9orf114     | 1.00 | 8.97E-01 | 9.22E-01 | 1594.29  | not significant |
| 6166 | ZC3H7B       | 1.00 | 8.48E-01 | 8.86E-01 | 6671.67  | not significant |
| 6167 | DCTN2        | 1.00 | 8.58E-01 | 8.94E-01 | 5000.09  | not significant |
| 6168 | APEX2        | 1.00 | 9.06E-01 | 9.29E-01 | 1473.68  | not significant |
| 6169 | PITPNM3      | 1.00 | 9.58E-01 | 9.68E-01 | 35.07    | not significant |
| 6170 | HIST1H3H     | 1.00 | 9.51E-01 | 9.63E-01 | 18.92    | not significant |
| 6171 | CDC34        | 1.00 | 9.14E-01 | 9.35E-01 | 1004.27  | not significant |
| 6172 | RBM10        | 1.00 | 8.92E-01 | 9.19E-01 | 1870.10  | not significant |
| 6173 | CAPN2        | 1.00 | 9.37E-01 | 9.52E-01 | 8.33     | not significant |
| 6174 | POLH         | 1.00 | 8.76E-01 | 9.07E-01 | 2538.20  | not significant |
| 6175 | YLPM1        | 1.00 | 9.34E-01 | 9.50E-01 | 5615.35  | not significant |
| 6176 | PRKRA        | 1.00 | 9.14E-01 | 9.35E-01 | 1017.48  | not significant |
| 6177 | ZNF433       | 1.00 | 9.47E-01 | 9.60E-01 | 14.59    | not significant |
| 6178 | LOC100132352 | 1.00 | 9.57E-01 | 9.68E-01 | 34.19    | not significant |
| 6179 | RPL23AP53    | 1.00 | 9.11E-01 | 9.32E-01 | 1019.59  | not significant |
| 6180 | C1orf162     | 1.00 | 9.51E-01 | 9.63E-01 | 22.80    | not significant |
| 6181 | OAT          | 1.00 | 8.89E-01 | 9.16E-01 | 1676.52  | not significant |
| 6182 | JPH1         | 1.00 | 8.95E-01 | 9.21E-01 | 1657.25  | not significant |
| 6183 | MPZL1        | 1.00 | 8.50E-01 | 8.88E-01 | 4029.81  | not significant |
| 6184 | THAP7        | 1.00 | 9.10E-01 | 9.32E-01 | 887.09   | not significant |
| 6185 | AIMP1        | 1.00 | 8.77E-01 | 9.07E-01 | 2633.09  | not significant |
| 6186 | LOC101929125 | 1.00 | 9.44E-01 | 9.58E-01 | 15.13    | not significant |
| 6187 | ARMC12       | 1.00 | 9.51E-01 | 9.63E-01 | 31.15    | not significant |
| 6188 | TMEM214      | 1.00 | 8.93E-01 | 9.19E-01 | 1545.91  | not significant |
| 6189 | FBXO32       | 1.00 | 9.49E-01 | 9.62E-01 | 133.62   | not significant |
| 6190 | QRICH2       | 1.00 | 9.36E-01 | 9.52E-01 | 328.71   | not significant |
| 6191 | SKP1P2       | 1.00 | 9.36E-01 | 9.52E-01 | 10.83    | not significant |
| 6192 | MPLKIP       | 1.00 | 8.99E-01 | 9.23E-01 | 1328.68  | not significant |
| 6193 | TMIGD2       | 1.00 | 9.34E-01 | 9.50E-01 | 206.46   | not significant |
| 6194 | HYAL2        | 1.00 | 9.52E-01 | 9.64E-01 | 50.28    | not significant |
| 6195 | GORAB        | 1.00 | 9.26E-01 | 9.45E-01 | 473.77   | not significant |
| 6196 | APBB1        | 1.00 | 9.48E-01 | 9.61E-01 | 119.20   | not significant |
| 6197 | RPL18A       | 1.00 | 8.31E-01 | 8.72E-01 | 15401.24 | not significant |
| 6198 | SREK1        | 1.00 | 8.73E-01 | 9.05E-01 | 4207.98  | not significant |
| 6199 | RFTN2        | 1.00 | 9.29E-01 | 9.47E-01 | 11.25    | not significant |
| 6200 | PCM1         | 1.00 | 8.05E-01 | 8.51E-01 | 10530.37 | not significant |
| 6201 | WDR31        | 1.00 | 9.42E-01 | 9.56E-01 | 21.79    | not significant |
| 6202 | TECTA        | 1.01 | 9.39E-01 | 9.54E-01 | 16.60    | not significant |
| 6203 | CAPRIN1      | 1.01 | 7.90E-01 | 8.40E-01 | 19864.39 | not significant |
| 6204 | CCDC142      | 1.01 | 9.33E-01 | 9.50E-01 | 278.08   | not significant |
| 6205 | ATP6V0D1     | 1.01 | 8.65E-01 | 8.99E-01 | 1627.73  | not significant |
| 6206 | NDUFA6-AS1   | 1.01 | 9.31E-01 | 9.48E-01 | 11.79    | not significant |
| 6207 | CPPED1       | 1.01 | 8.91E-01 | 9.17E-01 | 978.49   | not significant |
| 6208 | PGAP2        | 1.01 | 8.88E-01 | 9.15E-01 | 1092.06  | not significant |
| 6209 | NCAPD3       | 1.01 | 8.11E-01 | 8.55E-01 | 9625.52  | not significant |
| 6210 | VEGFB        | 1.01 | 8.68E-01 | 9.01E-01 | 1607.41  | not significant |
| 6211 | EDC3         | 1.01 | 8.66E-01 | 8.99E-01 | 1671.55  | not significant |
| 6212 | LIPE         | 1.01 | 9.25E-01 | 9.44E-01 | 417.81   | not significant |
| 6213 | BCL2L1       | 1.01 | 8.23E-01 | 8.65E-01 | 7177.95  | not significant |
| 6214 | ST20         | 1.01 | 9.30E-01 | 9.47E-01 | 190.63   | not significant |
| 6215 | GLUD2        | 1.01 | 9.38E-01 | 9.53E-01 | 145.06   | not significant |
| 6216 | ETV4         | 1.01 | 9.25E-01 | 9.44E-01 | 12.21    | not significant |
| 6217 | C1orf35      | 1.01 | 8.83E-01 | 9.12E-01 | 989.14   | not significant |
| 6218 | TTC23        | 1.01 | 9.39E-01 | 9.53E-01 | 41.51    | not significant |
| 6219 | TMEM17       | 1.01 | 9.16E-01 | 9.36E-01 | 9.86     | not significant |
| 6220 | RALY-AS1     | 1.01 | 9.37E-01 | 9.52E-01 | 26.31    | not significant |
| 6221 | PAFAH1B2     | 1.01 | 8.27E-01 | 8.69E-01 | 2555.68  | not significant |
| 6222 | SNX27        | 1.01 | 8.75E-01 | 9.06E-01 | 1134.06  | not significant |
| 6223 | LUC7L2       | 1.01 | 9.34E-01 | 9.50E-01 | 747.47   | not significant |
| 6224 | STK17B       | 1.01 | 7.78E-01 | 8.30E-01 | 8187.80  | not significant |
| 6225 | LOC100288798 | 1.01 | 9.37E-01 | 9.52E-01 | 145.31   | not significant |
| 6226 | GGH          | 1.01 | 8.61E-01 | 8.96E-01 | 1602.81  | not significant |
| 6227 | PAK4         | 1.01 | 8.76E-01 | 9.07E-01 | 936.14   | not significant |
| 6228 | RALGAPA2     | 1.01 | 8.66E-01 | 8.99E-01 | 1260.40  | not significant |
| 6229 | MLH1         | 1.01 | 8.16E-01 | 8.60E-01 | 3330.61  | not significant |
| 6230 | CCDC9        | 1.01 | 8.95E-01 | 9.21E-01 | 651.56   | not significant |
| 6231 | STXBP4       | 1.01 | 9.27E-01 | 9.46E-01 | 208.96   | not significant |
| 6232 | LINC00667    | 1.01 | 8.86E-01 | 9.14E-01 | 740.34   | not significant |
| 6233 | TRAM1        | 1.01 | 7.50E-01 | 8.06E-01 | 17498.67 | not significant |
| 6234 | KLHL32       | 1.01 | 9.33E-01 | 9.50E-01 | 32.45    | not significant |
| 6235 | SEC62        | 1.01 | 8.17E-01 | 8.61E-01 | 3560.61  | not significant |
| 6236 | DNPEP        | 1.01 | 8.38E-01 | 8.78E-01 | 1908.54  | not significant |

|      |              |      |          |          |          |                 |
|------|--------------|------|----------|----------|----------|-----------------|
| 6237 | PPP1R12C     | 1.01 | 8.37E-01 | 8.77E-01 | 2634.35  | not significant |
| 6238 | HIRIP3       | 1.01 | 8.23E-01 | 8.66E-01 | 2336.54  | not significant |
| 6239 | ERLIN1       | 1.01 | 8.36E-01 | 8.76E-01 | 1718.21  | not significant |
| 6240 | BSPRY        | 1.01 | 9.34E-01 | 9.50E-01 | 78.26    | not significant |
| 6241 | CWF19L1      | 1.01 | 8.29E-01 | 8.71E-01 | 1819.15  | not significant |
| 6242 | CRAT         | 1.01 | 9.14E-01 | 9.35E-01 | 294.20   | not significant |
| 6243 | DSCR9        | 1.01 | 9.25E-01 | 9.44E-01 | 19.07    | not significant |
| 6244 | ZBTB48       | 1.01 | 8.84E-01 | 9.13E-01 | 634.37   | not significant |
| 6245 | ASB12        | 1.01 | 9.26E-01 | 9.44E-01 | 21.89    | not significant |
| 6246 | SLC2A6       | 1.01 | 9.09E-01 | 9.31E-01 | 10.19    | not significant |
| 6247 | GPATCH8      | 1.01 | 7.88E-01 | 8.38E-01 | 3950.97  | not significant |
| 6248 | ZC3H7A       | 1.01 | 7.94E-01 | 8.43E-01 | 3613.03  | not significant |
| 6249 | TINCR        | 1.01 | 9.30E-01 | 9.48E-01 | 31.66    | not significant |
| 6250 | CFD          | 1.01 | 8.98E-01 | 9.22E-01 | 8.60     | not significant |
| 6251 | LOC100288069 | 1.01 | 9.09E-01 | 9.31E-01 | 11.73    | not significant |
| 6252 | MAP2K2       | 1.01 | 7.79E-01 | 8.30E-01 | 4824.07  | not significant |
| 6253 | POT1         | 1.01 | 8.14E-01 | 8.58E-01 | 2496.14  | not significant |
| 6254 | ZNF326       | 1.01 | 8.10E-01 | 8.55E-01 | 2188.24  | not significant |
| 6255 | PAQR6        | 1.01 | 9.29E-01 | 9.47E-01 | 287.71   | not significant |
| 6256 | ASNS         | 1.01 | 8.82E-01 | 9.11E-01 | 691.32   | not significant |
| 6257 | C6orf226     | 1.01 | 9.24E-01 | 9.44E-01 | 131.95   | not significant |
| 6258 | SF3B1        | 1.01 | 7.43E-01 | 8.00E-01 | 19105.44 | not significant |
| 6259 | GNA12        | 1.01 | 8.08E-01 | 8.54E-01 | 2721.71  | not significant |
| 6260 | PRKACB       | 1.01 | 7.63E-01 | 8.17E-01 | 5341.25  | not significant |
| 6261 | OIP5         | 1.01 | 8.87E-01 | 9.15E-01 | 507.89   | not significant |
| 6262 | LRMP         | 1.01 | 8.14E-01 | 8.59E-01 | 1758.13  | not significant |
| 6263 | TAX1BP1      | 1.01 | 7.97E-01 | 8.45E-01 | 3925.41  | not significant |
| 6264 | KLHL21       | 1.01 | 8.66E-01 | 9.00E-01 | 832.14   | not significant |
| 6265 | EPS15L1      | 1.01 | 8.24E-01 | 8.66E-01 | 1598.17  | not significant |
| 6266 | ACSM3        | 1.01 | 8.98E-01 | 9.22E-01 | 10.24    | not significant |
| 6267 | PAPD7        | 1.01 | 8.39E-01 | 8.78E-01 | 1656.07  | not significant |
| 6268 | CD109        | 1.01 | 9.11E-01 | 9.33E-01 | 226.99   | not significant |
| 6269 | NUCB1-AS1    | 1.01 | 8.87E-01 | 9.15E-01 | 9.75     | not significant |
| 6270 | PDZD8        | 1.01 | 8.36E-01 | 8.76E-01 | 1416.63  | not significant |
| 6271 | DZIP1        | 1.01 | 8.81E-01 | 9.10E-01 | 475.60   | not significant |
| 6272 | CXCR5        | 1.01 | 9.14E-01 | 9.35E-01 | 21.46    | not significant |
| 6273 | ARSG         | 1.01 | 8.76E-01 | 9.07E-01 | 507.44   | not significant |
| 6274 | PRMT9        | 1.01 | 8.82E-01 | 9.11E-01 | 487.13   | not significant |
| 6275 | MASTL        | 1.01 | 8.03E-01 | 8.50E-01 | 2142.40  | not significant |
| 6276 | FAM71E1      | 1.01 | 9.04E-01 | 9.27E-01 | 15.92    | not significant |
| 6277 | MYLIP        | 1.01 | 8.86E-01 | 9.14E-01 | 8.79     | not significant |
| 6278 | VBP1         | 1.01 | 8.59E-01 | 8.94E-01 | 881.86   | not significant |
| 6279 | IPMK         | 1.01 | 8.73E-01 | 9.05E-01 | 550.02   | not significant |
| 6280 | ENTPD3-AS1   | 1.01 | 8.79E-01 | 9.09E-01 | 8.60     | not significant |
| 6281 | DAP          | 1.01 | 7.72E-01 | 8.25E-01 | 3252.64  | not significant |
| 6282 | PSMB4        | 1.01 | 7.47E-01 | 8.04E-01 | 5556.02  | not significant |
| 6283 | C11orf31     | 1.01 | 7.98E-01 | 8.46E-01 | 3509.58  | not significant |
| 6284 | DLG4         | 1.01 | 8.59E-01 | 8.94E-01 | 682.36   | not significant |
| 6285 | BMS1P4       | 1.01 | 9.11E-01 | 9.33E-01 | 138.48   | not significant |
| 6286 | CENPH        | 1.01 | 7.79E-01 | 8.30E-01 | 2672.43  | not significant |
| 6287 | MLYCD        | 1.01 | 8.90E-01 | 9.17E-01 | 308.57   | not significant |
| 6288 | FIG4         | 1.01 | 8.39E-01 | 8.78E-01 | 843.93   | not significant |
| 6289 | MAP3K9       | 1.01 | 8.44E-01 | 8.82E-01 | 878.80   | not significant |
| 6290 | GPN2         | 1.01 | 8.51E-01 | 8.88E-01 | 707.19   | not significant |
| 6291 | PLCG1-AS1    | 1.01 | 9.18E-01 | 9.38E-01 | 31.77    | not significant |
| 6292 | MMD          | 1.01 | 7.86E-01 | 8.36E-01 | 2245.97  | not significant |
| 6293 | SASS6        | 1.01 | 8.12E-01 | 8.57E-01 | 1732.64  | not significant |
| 6294 | DMXL2        | 1.01 | 8.17E-01 | 8.61E-01 | 1680.81  | not significant |
| 6295 | SNRNP35      | 1.01 | 8.65E-01 | 8.99E-01 | 525.30   | not significant |
| 6296 | CASKIN2      | 1.01 | 8.14E-01 | 8.58E-01 | 1283.44  | not significant |
| 6297 | TTC5         | 1.01 | 8.49E-01 | 8.87E-01 | 679.86   | not significant |
| 6298 | BTBD2        | 1.01 | 7.18E-01 | 7.81E-01 | 5283.04  | not significant |
| 6299 | TMEM87B      | 1.01 | 8.01E-01 | 8.48E-01 | 1391.65  | not significant |
| 6300 | GAL3ST4      | 1.01 | 8.85E-01 | 9.13E-01 | 392.04   | not significant |
| 6301 | CYB5RL       | 1.01 | 8.71E-01 | 9.03E-01 | 488.45   | not significant |
| 6302 | UBE2D4       | 1.01 | 8.75E-01 | 9.06E-01 | 361.32   | not significant |
| 6303 | C9orf85      | 1.01 | 8.77E-01 | 9.07E-01 | 414.89   | not significant |
| 6304 | BLOC1S3      | 1.01 | 8.88E-01 | 9.15E-01 | 278.40   | not significant |
| 6305 | ING1         | 1.01 | 8.19E-01 | 8.62E-01 | 1099.42  | not significant |
| 6306 | TMEM143      | 1.01 | 8.80E-01 | 9.10E-01 | 397.89   | not significant |
| 6307 | SCARF1       | 1.01 | 8.81E-01 | 9.10E-01 | 10.86    | not significant |
| 6308 | ZNF587B      | 1.01 | 8.90E-01 | 9.17E-01 | 318.52   | not significant |
| 6309 | CLEC11A      | 1.01 | 9.08E-01 | 9.30E-01 | 40.61    | not significant |
| 6310 | CDK11A       | 1.01 | 8.83E-01 | 9.12E-01 | 320.30   | not significant |
| 6311 | PQLC1        | 1.01 | 8.06E-01 | 8.52E-01 | 1398.84  | not significant |
| 6312 | ADAMTS13     | 1.01 | 8.60E-01 | 8.95E-01 | 8.05     | not significant |
| 6313 | TNRC18       | 1.01 | 7.04E-01 | 7.69E-01 | 5391.77  | not significant |
| 6314 | BRF2         | 1.01 | 8.30E-01 | 8.71E-01 | 749.32   | not significant |
| 6315 | NAA30        | 1.01 | 8.06E-01 | 8.52E-01 | 1441.51  | not significant |
| 6316 | CHD8         | 1.01 | 7.41E-01 | 7.99E-01 | 5730.63  | not significant |
| 6317 | TMOD1        | 1.01 | 8.86E-01 | 9.14E-01 | 15.04    | not significant |
| 6318 | CLEC4A       | 1.01 | 8.66E-01 | 8.99E-01 | 9.46     | not significant |
| 6319 | WDR13        | 1.01 | 8.88E-01 | 9.15E-01 | 222.62   | not significant |
| 6320 | TRPM2        | 1.01 | 8.00E-01 | 8.48E-01 | 1279.65  | not significant |
| 6321 | NUP54        | 1.01 | 7.35E-01 | 7.94E-01 | 2616.56  | not significant |
| 6322 | ADCY3        | 1.01 | 7.49E-01 | 8.06E-01 | 1941.22  | not significant |
| 6323 | MGC57346     | 1.01 | 8.79E-01 | 9.09E-01 | 247.56   | not significant |
| 6324 | SLC27A1      | 1.01 | 9.01E-01 | 9.25E-01 | 107.51   | not significant |



|      |              |      |          |          |          |                 |
|------|--------------|------|----------|----------|----------|-----------------|
| 6325 | HYKK         | 1.01 | 8.96E-01 | 9.21E-01 | 25.58    | not significant |
| 6326 | PAPD4        | 1.01 | 7.26E-01 | 7.87E-01 | 2730.55  | not significant |
| 6327 | ZNF780A      | 1.01 | 8.65E-01 | 8.99E-01 | 391.97   | not significant |
| 6328 | PIGH         | 1.01 | 8.19E-01 | 8.63E-01 | 921.56   | not significant |
| 6329 | ZNF280B      | 1.01 | 8.92E-01 | 9.18E-01 | 176.49   | not significant |
| 6330 | FAM129A      | 1.01 | 8.28E-01 | 8.70E-01 | 717.28   | not significant |
| 6331 | EDA2R        | 1.01 | 8.84E-01 | 9.13E-01 | 16.33    | not significant |
| 6332 | CD38         | 1.01 | 7.45E-01 | 8.02E-01 | 1911.39  | not significant |
| 6333 | FAM118A      | 1.01 | 7.92E-01 | 8.41E-01 | 1118.09  | not significant |
| 6334 | AACS         | 1.01 | 7.72E-01 | 8.25E-01 | 1438.58  | not significant |
| 6335 | GCAT         | 1.01 | 8.72E-01 | 9.04E-01 | 252.48   | not significant |
| 6336 | MTERF1       | 1.01 | 8.58E-01 | 8.94E-01 | 401.63   | not significant |
| 6337 | MLEC         | 1.01 | 6.73E-01 | 7.42E-01 | 16734.99 | not significant |
| 6338 | FCHO2        | 1.01 | 8.58E-01 | 8.94E-01 | 9.62     | not significant |
| 6339 | RBKS         | 1.01 | 8.98E-01 | 9.22E-01 | 78.48    | not significant |
| 6340 | SMAP1        | 1.01 | 7.43E-01 | 8.00E-01 | 1980.59  | not significant |
| 6341 | GOLPH3L      | 1.01 | 7.77E-01 | 8.29E-01 | 1354.28  | not significant |
| 6342 | ERCC1        | 1.01 | 7.48E-01 | 8.04E-01 | 1694.33  | not significant |
| 6343 | FANCD2       | 1.01 | 7.03E-01 | 7.68E-01 | 4831.63  | not significant |
| 6344 | CYSLTR2      | 1.01 | 8.61E-01 | 8.96E-01 | 307.71   | not significant |
| 6345 | ZNF775       | 1.01 | 8.31E-01 | 8.72E-01 | 660.22   | not significant |
| 6346 | ZNF611       | 1.01 | 8.05E-01 | 8.51E-01 | 737.48   | not significant |
| 6347 | MORF4L2-AS1  | 1.01 | 8.97E-01 | 9.22E-01 | 50.20    | not significant |
| 6348 | HDFG         | 1.01 | 6.67E-01 | 7.38E-01 | 13729.62 | not significant |
| 6349 | STRADA       | 1.01 | 7.27E-01 | 7.88E-01 | 2085.44  | not significant |
| 6350 | B4GALT5      | 1.01 | 7.94E-01 | 8.43E-01 | 849.08   | not significant |
| 6351 | ADAM17       | 1.01 | 7.55E-01 | 8.11E-01 | 1573.71  | not significant |
| 6352 | KCTD11       | 1.01 | 8.72E-01 | 9.04E-01 | 226.25   | not significant |
| 6353 | LOC642236    | 1.01 | 8.91E-01 | 9.18E-01 | 33.56    | not significant |
| 6354 | GRK6         | 1.01 | 6.91E-01 | 7.58E-01 | 4042.15  | not significant |
| 6355 | ST7L         | 1.01 | 8.41E-01 | 8.80E-01 | 432.42   | not significant |
| 6356 | PEX12        | 1.01 | 8.63E-01 | 8.97E-01 | 269.62   | not significant |
| 6357 | FBXW11       | 1.01 | 7.54E-01 | 8.10E-01 | 1646.76  | not significant |
| 6358 | MED17        | 1.01 | 7.78E-01 | 8.29E-01 | 1111.16  | not significant |
| 6359 | SLC25A37     | 1.01 | 8.48E-01 | 8.86E-01 | 358.84   | not significant |
| 6360 | LINC00888    | 1.01 | 8.78E-01 | 9.08E-01 | 165.77   | not significant |
| 6361 | AAMP         | 1.01 | 7.26E-01 | 7.88E-01 | 3092.55  | not significant |
| 6362 | URM1         | 1.01 | 7.10E-01 | 7.73E-01 | 2581.91  | not significant |
| 6363 | ASXL2        | 1.01 | 7.52E-01 | 8.09E-01 | 2286.39  | not significant |
| 6364 | C5orf22      | 1.01 | 7.60E-01 | 8.15E-01 | 1510.18  | not significant |
| 6365 | PSMG3        | 1.01 | 7.46E-01 | 8.02E-01 | 1714.23  | not significant |
| 6366 | MYD88        | 1.01 | 6.67E-01 | 7.38E-01 | 3589.16  | not significant |
| 6367 | NUDT17       | 1.01 | 8.71E-01 | 9.03E-01 | 17.19    | not significant |
| 6368 | RAF1         | 1.01 | 6.07E-01 | 6.86E-01 | 5955.80  | not significant |
| 6369 | NCK1         | 1.01 | 7.37E-01 | 7.96E-01 | 1761.91  | not significant |
| 6370 | AHCY         | 1.01 | 6.68E-01 | 7.39E-01 | 12847.98 | not significant |
| 6371 | KRR1         | 1.01 | 7.02E-01 | 7.67E-01 | 3844.77  | not significant |
| 6372 | ANKS1A       | 1.01 | 7.83E-01 | 8.33E-01 | 858.88   | not significant |
| 6373 | LTBP4        | 1.01 | 8.46E-01 | 8.84E-01 | 335.40   | not significant |
| 6374 | CDK9         | 1.01 | 7.26E-01 | 7.88E-01 | 1903.08  | not significant |
| 6375 | ISYNA1       | 1.01 | 8.90E-01 | 9.17E-01 | 52.48    | not significant |
| 6376 | PCOLCE       | 1.01 | 8.88E-01 | 9.16E-01 | 45.37    | not significant |
| 6377 | POLR3F       | 1.01 | 8.21E-01 | 8.64E-01 | 544.53   | not significant |
| 6378 | AGBL2        | 1.01 | 8.85E-01 | 9.14E-01 | 94.37    | not significant |
| 6379 | CTRL         | 1.01 | 8.88E-01 | 9.15E-01 | 66.31    | not significant |
| 6380 | CCDC159      | 1.01 | 8.88E-01 | 9.15E-01 | 61.80    | not significant |
| 6381 | LOC100129534 | 1.01 | 7.35E-01 | 7.94E-01 | 11.87    | not significant |
| 6382 | SPHK2        | 1.01 | 7.63E-01 | 8.17E-01 | 1150.60  | not significant |
| 6383 | DEDD2        | 1.01 | 7.93E-01 | 8.42E-01 | 821.26   | not significant |
| 6384 | IDH1-AS1     | 1.01 | 8.65E-01 | 8.99E-01 | 15.97    | not significant |
| 6385 | TSPAN33      | 1.01 | 7.92E-01 | 8.42E-01 | 917.25   | not significant |
| 6386 | ZNF585A      | 1.01 | 8.15E-01 | 8.59E-01 | 543.20   | not significant |
| 6387 | TAF11        | 1.01 | 7.34E-01 | 7.93E-01 | 1366.05  | not significant |
| 6388 | BZW2         | 1.01 | 5.97E-01 | 6.77E-01 | 6901.59  | not significant |
| 6389 | C14orf142    | 1.01 | 7.74E-01 | 8.27E-01 | 1099.71  | not significant |
| 6390 | NFYB         | 1.01 | 6.53E-01 | 7.27E-01 | 2863.10  | not significant |
| 6391 | DBIL5P       | 1.01 | 8.80E-01 | 9.10E-01 | 35.18    | not significant |
| 6392 | TMEM106C     | 1.01 | 5.79E-01 | 6.62E-01 | 7793.38  | not significant |
| 6393 | SLC10A3      | 1.01 | 8.62E-01 | 8.97E-01 | 17.69    | not significant |
| 6394 | ZCCHC6       | 1.01 | 7.53E-01 | 8.10E-01 | 1259.42  | not significant |
| 6395 | GFOD1        | 1.01 | 8.70E-01 | 9.03E-01 | 138.68   | not significant |
| 6396 | RBFADN       | 1.01 | 8.26E-01 | 8.68E-01 | 8.93     | not significant |
| 6397 | BCKDK        | 1.01 | 7.60E-01 | 8.15E-01 | 910.04   | not significant |
| 6398 | MAP3K11      | 1.01 | 6.94E-01 | 7.60E-01 | 2726.91  | not significant |
| 6399 | LINC01011    | 1.01 | 8.70E-01 | 9.02E-01 | 24.41    | not significant |
| 6400 | SLC16A5      | 1.01 | 8.72E-01 | 9.04E-01 | 113.35   | not significant |
| 6401 | BRICD5       | 1.01 | 8.87E-01 | 9.15E-01 | 108.56   | not significant |
| 6402 | CFL2         | 1.01 | 8.42E-01 | 8.81E-01 | 292.15   | not significant |
| 6403 | TICRR        | 1.01 | 7.22E-01 | 7.84E-01 | 2390.32  | not significant |
| 6404 | ACD          | 1.01 | 7.41E-01 | 7.99E-01 | 1166.38  | not significant |
| 6405 | METTL10      | 1.01 | 7.66E-01 | 8.20E-01 | 1027.16  | not significant |
| 6406 | SNRNP27      | 1.01 | 6.72E-01 | 7.42E-01 | 1984.60  | not significant |
| 6407 | ATP1B1       | 1.01 | 8.74E-01 | 9.05E-01 | 94.53    | not significant |
| 6408 | C9orf9       | 1.01 | 8.41E-01 | 8.80E-01 | 292.65   | not significant |
| 6409 | RHOC         | 1.01 | 7.19E-01 | 7.82E-01 | 1659.29  | not significant |
| 6410 | PHYH         | 1.01 | 8.43E-01 | 8.82E-01 | 287.02   | not significant |
| 6411 | RBBP8        | 1.01 | 5.91E-01 | 6.72E-01 | 4306.58  | not significant |
| 6412 | PHLDB2       | 1.01 | 8.01E-01 | 8.48E-01 | 544.53   | not significant |

|      |              |      |          |          |          |                 |
|------|--------------|------|----------|----------|----------|-----------------|
| 6413 | TMEM203      | 1.01 | 7.36E-01 | 7.95E-01 | 1228.26  | not significant |
| 6414 | PML          | 1.01 | 6.62E-01 | 7.34E-01 | 2431.46  | not significant |
| 6415 | C3orf35      | 1.01 | 8.33E-01 | 8.74E-01 | 11.18    | not significant |
| 6416 | SLU7         | 1.01 | 6.61E-01 | 7.33E-01 | 2364.20  | not significant |
| 6417 | RBL1         | 1.01 | 6.06E-01 | 6.85E-01 | 4586.19  | not significant |
| 6418 | AZ12         | 1.01 | 6.63E-01 | 7.35E-01 | 2576.88  | not significant |
| 6419 | NUP210       | 1.01 | 6.06E-01 | 6.85E-01 | 22826.07 | not significant |
| 6420 | LOC100128568 | 1.01 | 8.53E-01 | 8.90E-01 | 21.25    | not significant |
| 6421 | TVP23B       | 1.01 | 8.53E-01 | 8.90E-01 | 230.80   | not significant |
| 6422 | MCMDC2       | 1.01 | 8.28E-01 | 8.70E-01 | 12.34    | not significant |
| 6423 | LINC00926    | 1.01 | 8.73E-01 | 9.04E-01 | 54.06    | not significant |
| 6424 | PRKD2        | 1.01 | 6.10E-01 | 6.88E-01 | 3602.23  | not significant |
| 6425 | VPS13B       | 1.01 | 8.13E-01 | 8.58E-01 | 2861.25  | not significant |
| 6426 | LOC100129917 | 1.01 | 8.63E-01 | 8.97E-01 | 135.77   | not significant |
| 6427 | HPS1         | 1.01 | 6.91E-01 | 7.58E-01 | 1600.99  | not significant |
| 6428 | PSIP1        | 1.01 | 5.83E-01 | 6.65E-01 | 11214.75 | not significant |
| 6429 | ATG12        | 1.01 | 6.84E-01 | 7.52E-01 | 1788.87  | not significant |
| 6430 | LOC101928068 | 1.01 | 8.59E-01 | 8.94E-01 | 24.78    | not significant |
| 6431 | CNKS1        | 1.01 | 8.26E-01 | 8.68E-01 | 11.11    | not significant |
| 6432 | HCLS1        | 1.01 | 6.49E-01 | 7.23E-01 | 6016.36  | not significant |
| 6433 | ATF3         | 1.01 | 7.79E-01 | 8.30E-01 | 582.12   | not significant |
| 6434 | ASB13        | 1.01 | 7.98E-01 | 8.46E-01 | 605.72   | not significant |
| 6435 | MCL1         | 1.01 | 5.46E-01 | 6.32E-01 | 5581.82  | not significant |
| 6436 | SREK1IP1     | 1.01 | 5.95E-01 | 6.76E-01 | 3635.07  | not significant |
| 6437 | RBBP5        | 1.01 | 6.54E-01 | 7.27E-01 | 2115.91  | not significant |
| 6438 | LRFN1        | 1.01 | 8.16E-01 | 8.60E-01 | 334.10   | not significant |
| 6439 | TSC2         | 1.01 | 8.06E-01 | 8.52E-01 | 2510.84  | not significant |
| 6440 | XYLT2        | 1.01 | 7.39E-01 | 7.97E-01 | 968.52   | not significant |
| 6441 | TTF1         | 1.01 | 6.52E-01 | 7.25E-01 | 2215.73  | not significant |
| 6442 | RBM6         | 1.01 | 5.58E-01 | 6.43E-01 | 4890.31  | not significant |
| 6443 | ARHGEF1      | 1.01 | 5.95E-01 | 6.76E-01 | 3720.09  | not significant |
| 6444 | SIAH2        | 1.01 | 6.75E-01 | 7.45E-01 | 2483.40  | not significant |
| 6445 | LOC100129697 | 1.01 | 8.39E-01 | 8.78E-01 | 17.11    | not significant |
| 6446 | EXO5         | 1.01 | 7.60E-01 | 8.15E-01 | 697.47   | not significant |
| 6447 | CALR         | 1.01 | 5.79E-01 | 6.62E-01 | 41076.61 | not significant |
| 6448 | ORMDL1       | 1.01 | 6.05E-01 | 6.85E-01 | 2928.81  | not significant |
| 6449 | CCDC157      | 1.01 | 8.55E-01 | 8.91E-01 | 127.33   | not significant |
| 6450 | CLPTM1L      | 1.01 | 6.08E-01 | 6.86E-01 | 8017.20  | not significant |
| 6451 | MICALL1      | 1.01 | 7.65E-01 | 8.19E-01 | 677.06   | not significant |
| 6452 | KCNK5        | 1.01 | 6.92E-01 | 7.59E-01 | 1314.28  | not significant |
| 6453 | SLC41A1      | 1.01 | 6.71E-01 | 7.41E-01 | 1830.54  | not significant |
| 6454 | MRPS21       | 1.01 | 8.17E-01 | 8.61E-01 | 290.95   | not significant |
| 6455 | RPL6         | 1.01 | 6.08E-01 | 6.87E-01 | 19195.34 | not significant |
| 6456 | DCUN1D2      | 1.01 | 7.32E-01 | 7.92E-01 | 808.01   | not significant |
| 6457 | GOSR1        | 1.01 | 6.45E-01 | 7.19E-01 | 1823.95  | not significant |
| 6458 | ELMOD2       | 1.01 | 6.56E-01 | 7.29E-01 | 1891.44  | not significant |
| 6459 | CDC5L        | 1.01 | 5.66E-01 | 6.50E-01 | 4625.46  | not significant |
| 6460 | FNIP2        | 1.01 | 6.75E-01 | 7.45E-01 | 1453.83  | not significant |
| 6461 | C19orf43     | 1.01 | 6.32E-01 | 7.08E-01 | 6497.37  | not significant |
| 6462 | EVL          | 1.01 | 4.81E-01 | 5.72E-01 | 20512.90 | not significant |
| 6463 | OTUD7B       | 1.01 | 8.59E-01 | 8.94E-01 | 53.35    | not significant |
| 6464 | GNA11        | 1.01 | 8.39E-01 | 8.78E-01 | 41.04    | not significant |
| 6465 | ATAD3B       | 1.01 | 7.56E-01 | 8.12E-01 | 834.79   | not significant |
| 6466 | LOC654841    | 1.01 | 8.34E-01 | 8.75E-01 | 17.71    | not significant |
| 6467 | TMEM9B       | 1.01 | 7.53E-01 | 8.09E-01 | 752.79   | not significant |
| 6468 | MAPK7        | 1.01 | 7.17E-01 | 7.80E-01 | 959.21   | not significant |
| 6469 | DLG1         | 1.01 | 5.78E-01 | 6.61E-01 | 3352.16  | not significant |
| 6470 | PCNP         | 1.01 | 5.59E-01 | 6.44E-01 | 6476.86  | not significant |
| 6471 | PPP1R16A     | 1.01 | 7.62E-01 | 8.17E-01 | 598.60   | not significant |
| 6472 | MSH2         | 1.01 | 5.51E-01 | 6.37E-01 | 7272.98  | not significant |
| 6473 | LINC00094    | 1.01 | 7.65E-01 | 8.19E-01 | 543.11   | not significant |
| 6474 | TLX2         | 1.01 | 8.20E-01 | 8.63E-01 | 13.72    | not significant |
| 6475 | EXD2         | 1.01 | 7.73E-01 | 8.26E-01 | 534.47   | not significant |
| 6476 | TMEM168      | 1.01 | 7.15E-01 | 7.78E-01 | 890.81   | not significant |
| 6477 | SNHG10       | 1.01 | 8.25E-01 | 8.67E-01 | 228.13   | not significant |
| 6478 | CYP4F29P     | 1.01 | 8.36E-01 | 8.76E-01 | 20.90    | not significant |
| 6479 | HCN2         | 1.01 | 8.50E-01 | 8.88E-01 | 28.85    | not significant |
| 6480 | CRYBG3       | 1.01 | 7.85E-01 | 8.35E-01 | 8.25     | not significant |
| 6481 | PKIA         | 1.01 | 6.20E-01 | 6.97E-01 | 2180.36  | not significant |
| 6482 | TYSND1       | 1.01 | 6.95E-01 | 7.61E-01 | 1132.23  | not significant |
| 6483 | CENPL        | 1.01 | 7.03E-01 | 7.68E-01 | 1064.33  | not significant |
| 6484 | NCOA1        | 1.01 | 5.78E-01 | 6.61E-01 | 3100.48  | not significant |
| 6485 | RGMA         | 1.01 | 8.33E-01 | 8.74E-01 | 166.63   | not significant |
| 6486 | YJEFN3       | 1.01 | 8.49E-01 | 8.86E-01 | 111.93   | not significant |
| 6487 | TMEM206      | 1.01 | 6.82E-01 | 7.50E-01 | 1390.47  | not significant |
| 6488 | SHISA5       | 1.01 | 5.82E-01 | 6.64E-01 | 4664.48  | not significant |
| 6489 | LEPROTL1     | 1.01 | 5.33E-01 | 6.20E-01 | 3826.04  | not significant |
| 6490 | VPS33B       | 1.01 | 7.82E-01 | 8.32E-01 | 472.68   | not significant |
| 6491 | F12          | 1.01 | 7.99E-01 | 8.47E-01 | 10.89    | not significant |
| 6492 | ZNF846       | 1.01 | 8.45E-01 | 8.83E-01 | 103.04   | not significant |
| 6493 | ATP1A3       | 1.01 | 7.86E-01 | 8.36E-01 | 359.82   | not significant |
| 6494 | ZFAND4       | 1.01 | 7.24E-01 | 7.86E-01 | 898.87   | not significant |
| 6495 | FGF14-AS2    | 1.01 | 8.50E-01 | 8.87E-01 | 59.70    | not significant |
| 6496 | SPCS3        | 1.01 | 4.43E-01 | 5.36E-01 | 9456.79  | not significant |
| 6497 | BICD2        | 1.01 | 6.07E-01 | 6.86E-01 | 2384.05  | not significant |
| 6498 | BUB3         | 1.01 | 4.59E-01 | 5.50E-01 | 9778.76  | not significant |
| 6499 | LOC100240735 | 1.01 | 8.49E-01 | 8.86E-01 | 66.09    | not significant |
| 6500 | RASGEF1A     | 1.01 | 7.81E-01 | 8.32E-01 | 8.63     | not significant |

|      |           |      |          |          |          |                 |
|------|-----------|------|----------|----------|----------|-----------------|
| 6501 | AGO2      | 1.01 | 6.64E-01 | 7.35E-01 | 1366.42  | not significant |
| 6502 | MAT2A     | 1.01 | 7.71E-01 | 8.24E-01 | 14187.57 | not significant |
| 6503 | ETV3      | 1.01 | 8.04E-01 | 8.51E-01 | 326.55   | not significant |
| 6504 | DDB2      | 1.01 | 6.06E-01 | 6.85E-01 | 2090.47  | not significant |
| 6505 | DGCR11    | 1.01 | 8.37E-01 | 8.77E-01 | 26.97    | not significant |
| 6506 | CCNYL1    | 1.01 | 7.42E-01 | 8.00E-01 | 606.91   | not significant |
| 6507 | GAB3      | 1.01 | 8.43E-01 | 8.81E-01 | 92.84    | not significant |
| 6508 | EFCAB12   | 1.01 | 8.25E-01 | 8.67E-01 | 19.08    | not significant |
| 6509 | DFFA      | 1.01 | 6.13E-01 | 6.91E-01 | 2140.64  | not significant |
| 6510 | HSD17B1   | 1.01 | 8.23E-01 | 8.66E-01 | 18.48    | not significant |
| 6511 | CFAP97    | 1.01 | 5.35E-01 | 6.22E-01 | 3626.09  | not significant |
| 6512 | TNFRSF25  | 1.02 | 7.71E-01 | 8.24E-01 | 409.54   | not significant |
| 6513 | DDX26B    | 1.02 | 8.13E-01 | 8.58E-01 | 221.46   | not significant |
| 6514 | MITD1     | 1.02 | 6.93E-01 | 7.60E-01 | 895.31   | not significant |
| 6515 | TOP3B     | 1.02 | 6.83E-01 | 7.52E-01 | 1064.48  | not significant |
| 6516 | CASS4     | 1.02 | 8.29E-01 | 8.70E-01 | 23.56    | not significant |
| 6517 | AHRR      | 1.02 | 8.03E-01 | 8.50E-01 | 244.46   | not significant |
| 6518 | CECR6     | 1.02 | 8.40E-01 | 8.79E-01 | 41.10    | not significant |
| 6519 | LRRFIP2   | 1.02 | 6.52E-01 | 7.25E-01 | 1459.46  | not significant |
| 6520 | USP48     | 1.02 | 5.23E-01 | 6.11E-01 | 3494.39  | not significant |
| 6521 | CNPPD1    | 1.02 | 6.01E-01 | 6.80E-01 | 2107.68  | not significant |
| 6522 | JUN       | 1.02 | 8.35E-01 | 8.75E-01 | 37.97    | not significant |
| 6523 | AURKC     | 1.02 | 8.08E-01 | 8.53E-01 | 16.13    | not significant |
| 6524 | C17orf80  | 1.02 | 6.14E-01 | 6.92E-01 | 2206.42  | not significant |
| 6525 | OSGEP     | 1.02 | 6.19E-01 | 6.97E-01 | 1815.65  | not significant |
| 6526 | CAHM      | 1.02 | 7.61E-01 | 8.15E-01 | 8.63     | not significant |
| 6527 | SLC35A3   | 1.02 | 6.68E-01 | 7.39E-01 | 1462.35  | not significant |
| 6528 | FSCN1     | 1.02 | 7.86E-01 | 8.36E-01 | 11.96    | not significant |
| 6529 | PTENP1    | 1.02 | 8.35E-01 | 8.75E-01 | 84.98    | not significant |
| 6530 | ATF5      | 1.02 | 7.58E-01 | 8.13E-01 | 425.01   | not significant |
| 6531 | SYCP2L    | 1.02 | 7.83E-01 | 8.33E-01 | 11.22    | not significant |
| 6532 | SFT2D1    | 1.02 | 6.23E-01 | 7.00E-01 | 1596.26  | not significant |
| 6533 | MAPK3     | 1.02 | 5.42E-01 | 6.28E-01 | 3091.37  | not significant |
| 6534 | SEL1L3    | 1.02 | 7.93E-01 | 8.42E-01 | 13.28    | not significant |
| 6535 | SLC8B1    | 1.02 | 6.09E-01 | 6.87E-01 | 1635.73  | not significant |
| 6536 | GSTK1     | 1.02 | 5.85E-01 | 6.67E-01 | 2143.32  | not significant |
| 6537 | GNA13     | 1.02 | 4.62E-01 | 5.54E-01 | 11511.07 | not significant |
| 6538 | FAM3A     | 1.02 | 7.97E-01 | 8.45E-01 | 239.32   | not significant |
| 6539 | TUT1      | 1.02 | 7.07E-01 | 7.71E-01 | 763.78   | not significant |
| 6540 | BBS2      | 1.02 | 6.95E-01 | 7.61E-01 | 849.39   | not significant |
| 6541 | EP400     | 1.02 | 7.76E-01 | 8.28E-01 | 6451.43  | not significant |
| 6542 | NBEA      | 1.02 | 7.93E-01 | 8.42E-01 | 264.60   | not significant |
| 6543 | ZNF562    | 1.02 | 7.07E-01 | 7.71E-01 | 713.00   | not significant |
| 6544 | TM9SF4    | 1.02 | 5.19E-01 | 6.07E-01 | 3503.39  | not significant |
| 6545 | ORC3      | 1.02 | 6.25E-01 | 7.02E-01 | 1462.60  | not significant |
| 6546 | ZCWPW2    | 1.02 | 7.95E-01 | 8.43E-01 | 14.71    | not significant |
| 6547 | NUDT13    | 1.02 | 8.02E-01 | 8.49E-01 | 18.30    | not significant |
| 6548 | MFSD10    | 1.02 | 6.89E-01 | 7.56E-01 | 966.03   | not significant |
| 6549 | ANKFY1    | 1.02 | 6.13E-01 | 6.91E-01 | 3188.28  | not significant |
| 6550 | FEM1A     | 1.02 | 5.89E-01 | 6.71E-01 | 1923.32  | not significant |
| 6551 | XXYL1     | 1.02 | 6.76E-01 | 7.45E-01 | 884.46   | not significant |
| 6552 | MERTK     | 1.02 | 8.30E-01 | 8.72E-01 | 71.08    | not significant |
| 6553 | HKR1      | 1.02 | 6.76E-01 | 7.45E-01 | 992.69   | not significant |
| 6554 | TBL2      | 1.02 | 8.01E-01 | 8.48E-01 | 199.47   | not significant |
| 6555 | GLOD4     | 1.02 | 5.47E-01 | 6.33E-01 | 2802.19  | not significant |
| 6556 | SMARCD2   | 1.02 | 4.76E-01 | 5.67E-01 | 6757.16  | not significant |
| 6557 | SUGP1     | 1.02 | 6.68E-01 | 7.39E-01 | 1116.89  | not significant |
| 6558 | NUP133    | 1.02 | 4.92E-01 | 5.82E-01 | 3620.15  | not significant |
| 6559 | COL15A1   | 1.02 | 7.63E-01 | 8.17E-01 | 10.05    | not significant |
| 6560 | WDR59     | 1.02 | 5.46E-01 | 6.32E-01 | 2430.05  | not significant |
| 6561 | HIST1H3B  | 1.02 | 8.21E-01 | 8.64E-01 | 36.51    | not significant |
| 6562 | DFNB59    | 1.02 | 8.22E-01 | 8.65E-01 | 33.88    | not significant |
| 6563 | KAT2B     | 1.02 | 7.68E-01 | 8.21E-01 | 395.03   | not significant |
| 6564 | SETD9     | 1.02 | 8.23E-01 | 8.66E-01 | 107.12   | not significant |
| 6565 | PRKCQ     | 1.02 | 5.53E-01 | 6.39E-01 | 2261.11  | not significant |
| 6566 | MBTPS1    | 1.02 | 4.52E-01 | 5.44E-01 | 5458.62  | not significant |
| 6567 | ECM1      | 1.02 | 7.90E-01 | 8.40E-01 | 18.62    | not significant |
| 6568 | FAM21A    | 1.02 | 8.17E-01 | 8.61E-01 | 110.70   | not significant |
| 6569 | ZFP41     | 1.02 | 7.35E-01 | 7.94E-01 | 481.47   | not significant |
| 6570 | PI4KA     | 1.02 | 4.86E-01 | 5.77E-01 | 5736.76  | not significant |
| 6571 | IMPAD1    | 1.02 | 4.40E-01 | 5.33E-01 | 4865.81  | not significant |
| 6572 | TMEM216   | 1.02 | 8.08E-01 | 8.54E-01 | 23.46    | not significant |
| 6573 | PGP       | 1.02 | 6.05E-01 | 6.85E-01 | 1521.31  | not significant |
| 6574 | SLC25A24  | 1.02 | 5.59E-01 | 6.44E-01 | 1911.54  | not significant |
| 6575 | SGMS1     | 1.02 | 7.90E-01 | 8.40E-01 | 227.60   | not significant |
| 6576 | CARKD     | 1.02 | 6.21E-01 | 6.98E-01 | 1271.57  | not significant |
| 6577 | SBF1      | 1.02 | 4.98E-01 | 5.88E-01 | 8181.91  | not significant |
| 6578 | ENAH      | 1.02 | 7.16E-01 | 7.78E-01 | 546.40   | not significant |
| 6579 | TROAP     | 1.02 | 7.37E-01 | 7.96E-01 | 3851.19  | not significant |
| 6580 | CA5B      | 1.02 | 8.11E-01 | 8.56E-01 | 133.21   | not significant |
| 6581 | PROB1     | 1.02 | 8.21E-01 | 8.64E-01 | 50.16    | not significant |
| 6582 | TPST2     | 1.02 | 5.85E-01 | 6.67E-01 | 1527.97  | not significant |
| 6583 | CHST7     | 1.02 | 7.96E-01 | 8.44E-01 | 174.99   | not significant |
| 6584 | UNC119B   | 1.02 | 5.02E-01 | 5.92E-01 | 5377.29  | not significant |
| 6585 | PSMB8-AS1 | 1.02 | 8.15E-01 | 8.60E-01 | 38.58    | not significant |
| 6586 | ZNF398    | 1.02 | 6.50E-01 | 7.24E-01 | 922.41   | not significant |
| 6587 | RNF185    | 1.02 | 5.98E-01 | 6.77E-01 | 1474.94  | not significant |
| 6588 | SPOPL     | 1.02 | 6.95E-01 | 7.61E-01 | 667.59   | not significant |

|      |              |      |          |          |          |                 |
|------|--------------|------|----------|----------|----------|-----------------|
| 6589 | ARL8B        | 1.02 | 4.47E-01 | 5.39E-01 | 3777.85  | not significant |
| 6590 | ARL2         | 1.02 | 7.33E-01 | 7.93E-01 | 443.13   | not significant |
| 6591 | ZNF124       | 1.02 | 7.14E-01 | 7.77E-01 | 552.68   | not significant |
| 6592 | FAM63A       | 1.02 | 7.89E-01 | 8.39E-01 | 19.38    | not significant |
| 6593 | SDF4         | 1.02 | 4.98E-01 | 5.88E-01 | 2915.73  | not significant |
| 6594 | LOC339862    | 1.02 | 6.18E-01 | 6.95E-01 | 1204.98  | not significant |
| 6595 | ST7          | 1.02 | 7.68E-01 | 8.21E-01 | 15.15    | not significant |
| 6596 | C11orf48     | 1.02 | 8.16E-01 | 8.60E-01 | 73.48    | not significant |
| 6597 | TMEM39A      | 1.02 | 6.12E-01 | 6.91E-01 | 1229.21  | not significant |
| 6598 | MGC27345     | 1.02 | 7.34E-01 | 7.93E-01 | 530.21   | not significant |
| 6599 | TMEM53       | 1.02 | 8.14E-01 | 8.59E-01 | 40.32    | not significant |
| 6600 | QKI          | 1.02 | 4.70E-01 | 5.62E-01 | 4755.60  | not significant |
| 6601 | PRSS36       | 1.02 | 7.56E-01 | 8.12E-01 | 11.31    | not significant |
| 6602 | FREM1        | 1.02 | 7.68E-01 | 8.21E-01 | 13.54    | not significant |
| 6603 | PARP12       | 1.02 | 5.09E-01 | 5.98E-01 | 2415.24  | not significant |
| 6604 | FBXW9        | 1.02 | 7.74E-01 | 8.26E-01 | 217.17   | not significant |
| 6605 | POLQ         | 1.02 | 5.53E-01 | 6.38E-01 | 2566.25  | not significant |
| 6606 | USE1         | 1.02 | 7.41E-01 | 7.99E-01 | 361.83   | not significant |
| 6607 | DNAJC18      | 1.02 | 6.95E-01 | 7.61E-01 | 564.50   | not significant |
| 6608 | ME2          | 1.02 | 3.73E-01 | 4.65E-01 | 6147.74  | not significant |
| 6609 | SMA4         | 1.02 | 7.55E-01 | 8.11E-01 | 12.09    | not significant |
| 6610 | CHKB         | 1.02 | 7.29E-01 | 7.90E-01 | 9.32     | not significant |
| 6611 | ZBTB14       | 1.02 | 6.11E-01 | 6.90E-01 | 1092.43  | not significant |
| 6612 | HDHD2        | 1.02 | 5.22E-01 | 6.10E-01 | 2528.88  | not significant |
| 6613 | RAB22A       | 1.02 | 5.61E-01 | 6.46E-01 | 1763.38  | not significant |
| 6614 | C15orf40     | 1.02 | 7.42E-01 | 8.00E-01 | 365.90   | not significant |
| 6615 | EPHB4        | 1.02 | 7.94E-01 | 8.43E-01 | 158.90   | not significant |
| 6616 | IGFBP6       | 1.02 | 7.73E-01 | 8.25E-01 | 211.11   | not significant |
| 6617 | CCDC94       | 1.02 | 6.35E-01 | 7.11E-01 | 932.53   | not significant |
| 6618 | SAMSN1       | 1.02 | 5.70E-01 | 6.54E-01 | 1443.93  | not significant |
| 6619 | GNB5         | 1.02 | 6.44E-01 | 7.18E-01 | 864.82   | not significant |
| 6620 | SMARCD3      | 1.02 | 8.08E-01 | 8.54E-01 | 52.23    | not significant |
| 6621 | MIOX         | 1.02 | 7.21E-01 | 7.84E-01 | 8.53     | not significant |
| 6622 | PRKAR2B      | 1.02 | 5.60E-01 | 6.45E-01 | 1639.52  | not significant |
| 6623 | MX1          | 1.02 | 7.50E-01 | 8.06E-01 | 265.57   | not significant |
| 6624 | HIPK3        | 1.02 | 4.90E-01 | 5.80E-01 | 3140.64  | not significant |
| 6625 | BVES         | 1.02 | 8.07E-01 | 8.53E-01 | 45.84    | not significant |
| 6626 | LHFPL1       | 1.02 | 8.00E-01 | 8.48E-01 | 38.22    | not significant |
| 6627 | EIF6         | 1.02 | 4.81E-01 | 5.72E-01 | 3333.56  | not significant |
| 6628 | POM121C      | 1.02 | 6.14E-01 | 6.92E-01 | 973.12   | not significant |
| 6629 | RILP         | 1.02 | 7.88E-01 | 8.38E-01 | 23.13    | not significant |
| 6630 | MAP3K15      | 1.02 | 7.99E-01 | 8.47E-01 | 31.46    | not significant |
| 6631 | GYPC         | 1.02 | 5.35E-01 | 6.22E-01 | 1719.86  | not significant |
| 6632 | NUTM2A-AS1   | 1.02 | 6.65E-01 | 7.37E-01 | 712.38   | not significant |
| 6633 | DNAL1        | 1.02 | 6.95E-01 | 7.61E-01 | 527.72   | not significant |
| 6634 | ERCC5        | 1.02 | 8.00E-01 | 8.48E-01 | 95.46    | not significant |
| 6635 | IFT88        | 1.02 | 7.29E-01 | 7.90E-01 | 385.14   | not significant |
| 6636 | FOXK2        | 1.02 | 3.69E-01 | 4.61E-01 | 7395.53  | not significant |
| 6637 | HELQ         | 1.02 | 6.85E-01 | 7.53E-01 | 535.97   | not significant |
| 6638 | LINC01176    | 1.02 | 7.66E-01 | 8.19E-01 | 16.15    | not significant |
| 6639 | LPP          | 1.02 | 7.55E-01 | 8.11E-01 | 1675.99  | not significant |
| 6640 | TTC18        | 1.02 | 7.53E-01 | 8.09E-01 | 13.67    | not significant |
| 6641 | TARBP2       | 1.02 | 5.57E-01 | 6.42E-01 | 1657.64  | not significant |
| 6642 | TIMM9        | 1.02 | 6.22E-01 | 7.00E-01 | 1189.31  | not significant |
| 6643 | AASDH        | 1.02 | 6.60E-01 | 7.32E-01 | 649.37   | not significant |
| 6644 | ZNF57        | 1.02 | 7.56E-01 | 8.11E-01 | 240.82   | not significant |
| 6645 | LOC100506472 | 1.02 | 8.00E-01 | 8.47E-01 | 69.75    | not significant |
| 6646 | BEX4         | 1.02 | 5.51E-01 | 6.37E-01 | 1830.94  | not significant |
| 6647 | POMGNT2      | 1.02 | 6.79E-01 | 7.48E-01 | 790.37   | not significant |
| 6648 | DGCR8        | 1.02 | 4.97E-01 | 5.87E-01 | 2366.34  | not significant |
| 6649 | MIOS         | 1.02 | 5.96E-01 | 6.76E-01 | 1004.53  | not significant |
| 6650 | POU6F1       | 1.02 | 7.97E-01 | 8.46E-01 | 60.50    | not significant |
| 6651 | VPS18        | 1.02 | 6.35E-01 | 7.10E-01 | 808.96   | not significant |
| 6652 | ACBD3        | 1.02 | 5.35E-01 | 6.22E-01 | 1527.92  | not significant |
| 6653 | CNNM4        | 1.02 | 6.00E-01 | 6.79E-01 | 944.61   | not significant |
| 6654 | H2AFV        | 1.02 | 3.68E-01 | 4.60E-01 | 11600.83 | not significant |
| 6655 | LRP4         | 1.02 | 7.08E-01 | 7.72E-01 | 8.92     | not significant |
| 6656 | MPRIIP       | 1.02 | 3.96E-01 | 4.88E-01 | 7270.52  | not significant |
| 6657 | LOC101927166 | 1.02 | 7.49E-01 | 8.05E-01 | 14.10    | not significant |
| 6658 | RASAL1       | 1.02 | 5.36E-01 | 6.23E-01 | 2113.44  | not significant |
| 6659 | FBXO22       | 1.02 | 7.03E-01 | 7.68E-01 | 400.58   | not significant |
| 6660 | SETD8        | 1.02 | 4.69E-01 | 5.60E-01 | 2461.01  | not significant |
| 6661 | POMT1        | 1.02 | 6.25E-01 | 7.02E-01 | 813.40   | not significant |
| 6662 | C5orf66      | 1.02 | 7.55E-01 | 8.11E-01 | 16.03    | not significant |
| 6663 | ZBTB49       | 1.02 | 7.40E-01 | 7.98E-01 | 253.77   | not significant |
| 6664 | ZNF607       | 1.02 | 6.69E-01 | 7.39E-01 | 540.57   | not significant |
| 6665 | VMA21        | 1.02 | 4.06E-01 | 4.98E-01 | 3577.12  | not significant |
| 6666 | ZNF174       | 1.02 | 6.67E-01 | 7.38E-01 | 547.00   | not significant |
| 6667 | SELK         | 1.02 | 6.11E-01 | 6.90E-01 | 910.46   | not significant |
| 6668 | SNAPC1       | 1.02 | 6.54E-01 | 7.27E-01 | 651.61   | not significant |
| 6669 | BAIAP2L2     | 1.02 | 7.86E-01 | 8.36E-01 | 36.88    | not significant |
| 6670 | SH3BGRL      | 1.02 | 4.37E-01 | 5.29E-01 | 4217.71  | not significant |
| 6671 | MED23        | 1.02 | 5.42E-01 | 6.28E-01 | 1994.02  | not significant |
| 6672 | TOMM20       | 1.02 | 3.56E-01 | 4.48E-01 | 7447.04  | not significant |
| 6673 | PBX2         | 1.02 | 6.17E-01 | 6.95E-01 | 963.40   | not significant |
| 6674 | SP140L       | 1.02 | 5.91E-01 | 6.72E-01 | 1249.19  | not significant |
| 6675 | PHLPP2       | 1.02 | 6.70E-01 | 7.40E-01 | 753.55   | not significant |
| 6676 | LOC100499484 | 1.02 | 7.19E-01 | 7.82E-01 | 11.28    | not significant |

|      |              |      |          |          |          |                 |
|------|--------------|------|----------|----------|----------|-----------------|
| 6677 | PIPSL        | 1.02 | 7.87E-01 | 8.37E-01 | 44.33    | not significant |
| 6678 | DNAJC21      | 1.02 | 4.69E-01 | 5.60E-01 | 2103.92  | not significant |
| 6679 | NEK11        | 1.02 | 7.26E-01 | 7.87E-01 | 12.42    | not significant |
| 6680 | RAD1         | 1.02 | 4.44E-01 | 5.36E-01 | 2406.93  | not significant |
| 6681 | IFNGR2       | 1.02 | 7.13E-01 | 7.76E-01 | 339.61   | not significant |
| 6682 | FOXRED2      | 1.02 | 4.01E-01 | 4.93E-01 | 3752.61  | not significant |
| 6683 | GATC         | 1.02 | 4.94E-01 | 5.84E-01 | 2310.00  | not significant |
| 6684 | TBCC         | 1.02 | 6.71E-01 | 7.41E-01 | 459.26   | not significant |
| 6685 | MFSD9        | 1.02 | 6.70E-01 | 7.40E-01 | 511.96   | not significant |
| 6686 | PSMA1        | 1.02 | 3.57E-01 | 4.49E-01 | 6719.52  | not significant |
| 6687 | MKRN2        | 1.02 | 4.45E-01 | 5.37E-01 | 2433.28  | not significant |
| 6688 | RAB11FIP2    | 1.02 | 5.70E-01 | 6.53E-01 | 1052.01  | not significant |
| 6689 | ADD3-AS1     | 1.02 | 7.27E-01 | 7.88E-01 | 12.78    | not significant |
| 6690 | NTN5         | 1.02 | 7.78E-01 | 8.29E-01 | 32.50    | not significant |
| 6691 | LINC01521    | 1.02 | 6.66E-01 | 7.37E-01 | 481.09   | not significant |
| 6692 | ZFAT         | 1.02 | 6.60E-01 | 7.33E-01 | 516.48   | not significant |
| 6693 | MED13        | 1.02 | 3.70E-01 | 4.62E-01 | 6505.08  | not significant |
| 6694 | CLSTN1       | 1.02 | 2.81E-01 | 3.68E-01 | 11547.96 | not significant |
| 6695 | SLFNL1-AS1   | 1.02 | 7.81E-01 | 8.32E-01 | 59.37    | not significant |
| 6696 | LCMT2        | 1.02 | 6.40E-01 | 7.15E-01 | 617.08   | not significant |
| 6697 | CPSF3        | 1.02 | 4.29E-01 | 5.21E-01 | 3068.43  | not significant |
| 6698 | NOP9         | 1.02 | 4.24E-01 | 5.16E-01 | 2877.13  | not significant |
| 6699 | SLC6A6       | 1.02 | 4.18E-01 | 5.10E-01 | 2913.40  | not significant |
| 6700 | ZNF525       | 1.02 | 6.08E-01 | 6.86E-01 | 788.27   | not significant |
| 6701 | ZNF317       | 1.02 | 4.37E-01 | 5.29E-01 | 2195.13  | not significant |
| 6702 | BCO2         | 1.02 | 7.64E-01 | 8.18E-01 | 24.52    | not significant |
| 6703 | EIF3A        | 1.02 | 2.52E-01 | 3.36E-01 | 23007.64 | not significant |
| 6704 | HCK          | 1.02 | 6.87E-01 | 7.54E-01 | 9.85     | not significant |
| 6705 | ATP6V1C2     | 1.02 | 7.15E-01 | 7.78E-01 | 13.33    | not significant |
| 6706 | SNAP29       | 1.02 | 4.90E-01 | 5.80E-01 | 2024.87  | not significant |
| 6707 | PARP14       | 1.02 | 3.85E-01 | 4.77E-01 | 5593.28  | not significant |
| 6708 | RTN4         | 1.02 | 2.99E-01 | 3.88E-01 | 9364.78  | not significant |
| 6709 | APPL1        | 1.02 | 3.28E-01 | 4.20E-01 | 4651.33  | not significant |
| 6710 | PET117       | 1.02 | 7.63E-01 | 8.17E-01 | 125.20   | not significant |
| 6711 | IFNAR1       | 1.02 | 3.63E-01 | 4.55E-01 | 3857.66  | not significant |
| 6712 | KLHL23       | 1.02 | 7.74E-01 | 8.27E-01 | 43.96    | not significant |
| 6713 | LOC101928784 | 1.02 | 7.60E-01 | 8.15E-01 | 26.02    | not significant |
| 6714 | ITK          | 1.02 | 2.89E-01 | 3.78E-01 | 6715.86  | not significant |
| 6715 | GPR89A       | 1.02 | 7.55E-01 | 8.11E-01 | 27.97    | not significant |
| 6716 | SLC26A4      | 1.02 | 7.36E-01 | 7.95E-01 | 17.10    | not significant |
| 6717 | VLDLR-AS1    | 1.02 | 7.17E-01 | 7.80E-01 | 13.69    | not significant |
| 6718 | BAP1         | 1.02 | 3.34E-01 | 4.25E-01 | 5490.59  | not significant |
| 6719 | PLXDC1       | 1.02 | 7.75E-01 | 8.27E-01 | 78.48    | not significant |
| 6720 | SUV39H1      | 1.02 | 7.21E-01 | 7.83E-01 | 258.36   | not significant |
| 6721 | TLL2         | 1.02 | 7.00E-01 | 7.65E-01 | 10.73    | not significant |
| 6722 | C1QTNF4      | 1.02 | 7.14E-01 | 7.77E-01 | 12.79    | not significant |
| 6723 | PDE7A        | 1.02 | 2.82E-01 | 3.70E-01 | 7320.15  | not significant |
| 6724 | DENND1B      | 1.02 | 3.78E-01 | 4.70E-01 | 3738.61  | not significant |
| 6725 | PIN4P1       | 1.02 | 6.97E-01 | 7.63E-01 | 10.34    | not significant |
| 6726 | ANKIB1       | 1.02 | 3.79E-01 | 4.70E-01 | 3147.37  | not significant |
| 6727 | C16orf62     | 1.02 | 4.48E-01 | 5.40E-01 | 2160.63  | not significant |
| 6728 | RGS3         | 1.02 | 6.81E-01 | 7.50E-01 | 396.74   | not significant |
| 6729 | ANKRD33B     | 1.02 | 5.44E-01 | 6.31E-01 | 1114.92  | not significant |
| 6730 | PIK3CA       | 1.02 | 5.12E-01 | 6.00E-01 | 1454.08  | not significant |
| 6731 | NCOA2        | 1.02 | 4.78E-01 | 5.69E-01 | 1908.30  | not significant |
| 6732 | SAMD3        | 1.02 | 6.95E-01 | 7.61E-01 | 10.42    | not significant |
| 6733 | PDCD6IP      | 1.02 | 4.01E-01 | 4.92E-01 | 4269.53  | not significant |
| 6734 | SPN          | 1.02 | 2.64E-01 | 3.50E-01 | 20333.10 | not significant |
| 6735 | PTRH1        | 1.02 | 7.24E-01 | 7.86E-01 | 222.47   | not significant |
| 6736 | CLIC5        | 1.02 | 7.62E-01 | 8.17E-01 | 99.74    | not significant |
| 6737 | MAGI2        | 1.02 | 6.61E-01 | 7.33E-01 | 8.07     | not significant |
| 6738 | MTMR14       | 1.02 | 4.97E-01 | 5.87E-01 | 1455.41  | not significant |
| 6739 | TARSL2       | 1.02 | 6.89E-01 | 7.56E-01 | 360.08   | not significant |
| 6740 | PIK3R5       | 1.02 | 4.64E-01 | 5.55E-01 | 1796.13  | not significant |
| 6741 | POLRMT       | 1.02 | 4.30E-01 | 5.22E-01 | 2411.14  | not significant |
| 6742 | RAP2B        | 1.02 | 5.50E-01 | 6.36E-01 | 1224.90  | not significant |
| 6743 | FAM20B       | 1.02 | 4.48E-01 | 5.40E-01 | 2628.89  | not significant |
| 6744 | PELO         | 1.02 | 4.52E-01 | 5.44E-01 | 1852.30  | not significant |
| 6745 | EDC4         | 1.02 | 4.00E-01 | 4.92E-01 | 5359.20  | not significant |
| 6746 | C9orf142     | 1.02 | 5.52E-01 | 6.38E-01 | 948.47   | not significant |
| 6747 | ZNF585B      | 1.02 | 6.05E-01 | 6.85E-01 | 709.53   | not significant |
| 6748 | VDAC3        | 1.02 | 3.16E-01 | 4.07E-01 | 7231.48  | not significant |
| 6749 | TRIM5        | 1.02 | 4.64E-01 | 5.56E-01 | 1843.65  | not significant |
| 6750 | CCDC183      | 1.02 | 6.77E-01 | 7.46E-01 | 9.75     | not significant |
| 6751 | LDHB         | 1.02 | 4.51E-01 | 5.43E-01 | 32914.87 | not significant |
| 6752 | SRC          | 1.02 | 6.72E-01 | 7.42E-01 | 365.39   | not significant |
| 6753 | FAM71F2      | 1.02 | 6.49E-01 | 7.23E-01 | 8.00     | not significant |
| 6754 | APMAP        | 1.02 | 3.97E-01 | 4.89E-01 | 3400.45  | not significant |
| 6755 | UBA6-AS1     | 1.02 | 6.40E-01 | 7.15E-01 | 465.82   | not significant |
| 6756 | CHRNB1       | 1.02 | 6.54E-01 | 7.27E-01 | 447.35   | not significant |
| 6757 | SLC9A8       | 1.02 | 5.45E-01 | 6.31E-01 | 1055.06  | not significant |
| 6758 | AGAP2        | 1.02 | 3.65E-01 | 4.57E-01 | 3411.47  | not significant |
| 6759 | LOH12CR2     | 1.02 | 7.16E-01 | 7.79E-01 | 14.80    | not significant |
| 6760 | RWDD3        | 1.02 | 6.99E-01 | 7.64E-01 | 278.84   | not significant |
| 6761 | CTCF         | 1.02 | 2.95E-01 | 3.84E-01 | 5511.67  | not significant |
| 6762 | DCAF13P3     | 1.02 | 7.06E-01 | 7.70E-01 | 13.20    | not significant |
| 6763 | CEP250       | 1.02 | 3.28E-01 | 4.19E-01 | 4423.70  | not significant |
| 6764 | FAM179B      | 1.02 | 7.38E-01 | 7.97E-01 | 143.56   | not significant |

|      |           |      |          |          |         |                 |
|------|-----------|------|----------|----------|---------|-----------------|
| 6765 | ZNF786    | 1.02 | 6.90E-01 | 7.57E-01 | 307.40  | not significant |
| 6766 | KBTBD7    | 1.02 | 6.34E-01 | 7.10E-01 | 477.60  | not significant |
| 6767 | PNN       | 1.02 | 3.69E-01 | 4.61E-01 | 8550.54 | not significant |
| 6768 | LINC00641 | 1.02 | 6.55E-01 | 7.28E-01 | 613.30  | not significant |
| 6769 | HEATR5B   | 1.02 | 5.07E-01 | 5.97E-01 | 1292.21 | not significant |
| 6770 | ZNF583    | 1.02 | 7.21E-01 | 7.83E-01 | 197.02  | not significant |
| 6771 | DSTN      | 1.02 | 4.02E-01 | 4.94E-01 | 3092.50 | not significant |
| 6772 | TMEM141   | 1.02 | 6.78E-01 | 7.47E-01 | 316.60  | not significant |
| 6773 | DDIT3     | 1.02 | 6.76E-01 | 7.45E-01 | 316.99  | not significant |
| 6774 | ATG2B     | 1.02 | 5.05E-01 | 5.95E-01 | 1851.61 | not significant |
| 6775 | ERLIN2    | 1.02 | 4.47E-01 | 5.39E-01 | 1656.98 | not significant |
| 6776 | BLM       | 1.02 | 4.03E-01 | 4.94E-01 | 2971.45 | not significant |
| 6777 | SOCS4     | 1.02 | 6.44E-01 | 7.19E-01 | 2598.55 | not significant |
| 6778 | MCCC1     | 1.02 | 5.20E-01 | 6.08E-01 | 1049.93 | not significant |
| 6779 | LINC01120 | 1.02 | 7.21E-01 | 7.83E-01 | 201.26  | not significant |
| 6780 | TMED3     | 1.02 | 4.67E-01 | 5.59E-01 | 1525.48 | not significant |
| 6781 | OSBPL3    | 1.02 | 5.07E-01 | 5.97E-01 | 1963.22 | not significant |
| 6782 | SNHG21    | 1.02 | 7.32E-01 | 7.92E-01 | 148.13  | not significant |
| 6783 | RTEL1     | 1.02 | 7.54E-01 | 8.10E-01 | 57.97   | not significant |
| 6784 | QDPR      | 1.02 | 5.43E-01 | 6.29E-01 | 842.23  | not significant |
| 6785 | ABHD8     | 1.02 | 6.54E-01 | 7.27E-01 | 388.49  | not significant |
| 6786 | FAM107B   | 1.02 | 4.42E-01 | 5.35E-01 | 1750.80 | not significant |
| 6787 | DDHD2     | 1.02 | 3.61E-01 | 4.53E-01 | 2867.01 | not significant |
| 6788 | RAB21     | 1.02 | 3.93E-01 | 4.85E-01 | 2682.05 | not significant |
| 6789 | SCN8A     | 1.02 | 6.06E-01 | 6.85E-01 | 654.24  | not significant |
| 6790 | NLRC3     | 1.02 | 3.92E-01 | 4.84E-01 | 2437.00 | not significant |
| 6791 | MYH10     | 1.02 | 4.11E-01 | 5.03E-01 | 3299.27 | not significant |
| 6792 | MAP1LC3B  | 1.02 | 3.89E-01 | 4.82E-01 | 2286.80 | not significant |
| 6793 | PHF10     | 1.02 | 3.78E-01 | 4.70E-01 | 2415.49 | not significant |
| 6794 | USP42     | 1.02 | 4.27E-01 | 5.19E-01 | 2074.43 | not significant |
| 6795 | RNFT2     | 1.02 | 6.86E-01 | 7.54E-01 | 247.36  | not significant |
| 6796 | STIM1     | 1.02 | 3.06E-01 | 3.96E-01 | 5815.31 | not significant |
| 6797 | PACSLN2   | 1.02 | 3.58E-01 | 4.50E-01 | 2974.35 | not significant |
| 6798 | GCA       | 1.02 | 6.68E-01 | 7.39E-01 | 310.99  | not significant |
| 6799 | CCDC126   | 1.02 | 6.96E-01 | 7.62E-01 | 224.63  | not significant |
| 6800 | CXCR4     | 1.02 | 2.69E-01 | 3.55E-01 | 8177.39 | not significant |
| 6801 | SPG21     | 1.02 | 3.82E-01 | 4.74E-01 | 2319.84 | not significant |
| 6802 | ITPA      | 1.02 | 4.48E-01 | 5.40E-01 | 1576.20 | not significant |
| 6803 | TRIP10    | 1.02 | 6.81E-01 | 7.50E-01 | 276.11  | not significant |
| 6804 | PCDHGA6   | 1.02 | 6.64E-01 | 7.35E-01 | 10.53   | not significant |
| 6805 | ADIPOR1   | 1.02 | 2.89E-01 | 3.77E-01 | 3967.78 | not significant |
| 6806 | SH3GL1    | 1.02 | 4.52E-01 | 5.44E-01 | 1382.96 | not significant |
| 6807 | SKP2      | 1.02 | 3.04E-01 | 3.93E-01 | 3442.08 | not significant |
| 6808 | PATL1     | 1.02 | 2.90E-01 | 3.78E-01 | 4127.80 | not significant |
| 6809 | ELMO2     | 1.03 | 4.04E-01 | 4.96E-01 | 1930.23 | not significant |
| 6810 | CLCN6     | 1.03 | 5.83E-01 | 6.65E-01 | 714.48  | not significant |
| 6811 | NME2      | 1.03 | 7.45E-01 | 8.02E-01 | 72.94   | not significant |
| 6812 | EPS8L2    | 1.03 | 6.98E-01 | 7.63E-01 | 15.39   | not significant |
| 6813 | MSL3      | 1.03 | 4.74E-01 | 5.65E-01 | 1201.04 | not significant |
| 6814 | ACTR6     | 1.03 | 4.98E-01 | 5.88E-01 | 1362.49 | not significant |
| 6815 | HIRA      | 1.03 | 2.67E-01 | 3.53E-01 | 5357.61 | not significant |
| 6816 | BLMH      | 1.03 | 2.96E-01 | 3.85E-01 | 4234.30 | not significant |
| 6817 | SOCS3     | 1.03 | 7.26E-01 | 7.87E-01 | 26.39   | not significant |
| 6818 | SCAND1    | 1.03 | 4.98E-01 | 5.88E-01 | 1287.12 | not significant |
| 6819 | DYNC2LL1  | 1.03 | 7.35E-01 | 7.94E-01 | 105.85  | not significant |
| 6820 | HMGXB4    | 1.03 | 3.49E-01 | 4.41E-01 | 2863.05 | not significant |
| 6821 | RNF20     | 1.03 | 4.14E-01 | 5.06E-01 | 1751.65 | not significant |
| 6822 | NFXL1     | 1.03 | 5.64E-01 | 6.49E-01 | 674.50  | not significant |
| 6823 | LPCAT4    | 1.03 | 5.40E-01 | 6.26E-01 | 1054.08 | not significant |
| 6824 | UBE2E3    | 1.03 | 6.25E-01 | 7.02E-01 | 440.46  | not significant |
| 6825 | ZUFSP     | 1.03 | 5.51E-01 | 6.36E-01 | 743.63  | not significant |
| 6826 | RNF152    | 1.03 | 6.66E-01 | 7.38E-01 | 12.81   | not significant |
| 6827 | NOXO1     | 1.03 | 6.75E-01 | 7.45E-01 | 13.18   | not significant |
| 6828 | CWC25     | 1.03 | 4.73E-01 | 5.64E-01 | 1268.19 | not significant |
| 6829 | ZDHHC2    | 1.03 | 3.43E-01 | 4.34E-01 | 2608.74 | not significant |
| 6830 | CCHCR1    | 1.03 | 5.40E-01 | 6.26E-01 | 805.17  | not significant |
| 6831 | GPA33     | 1.03 | 6.74E-01 | 7.43E-01 | 256.59  | not significant |
| 6832 | USP9Y     | 1.03 | 4.77E-01 | 5.68E-01 | 2500.32 | not significant |
| 6833 | TNNT3     | 1.03 | 7.13E-01 | 7.77E-01 | 26.51   | not significant |
| 6834 | ZNF407    | 1.03 | 5.20E-01 | 6.08E-01 | 851.99  | not significant |
| 6835 | KLKB1     | 1.03 | 7.01E-01 | 7.66E-01 | 19.26   | not significant |
| 6836 | IDH3G     | 1.03 | 4.86E-01 | 5.76E-01 | 1189.37 | not significant |
| 6837 | IFI35     | 1.03 | 6.54E-01 | 7.27E-01 | 324.52  | not significant |
| 6838 | COG5      | 1.03 | 3.93E-01 | 4.85E-01 | 1854.98 | not significant |
| 6839 | AQP4-AS1  | 1.03 | 7.08E-01 | 7.72E-01 | 23.04   | not significant |
| 6840 | SAMD1     | 1.03 | 3.97E-01 | 4.89E-01 | 1691.31 | not significant |
| 6841 | PAQR3     | 1.03 | 3.35E-01 | 4.26E-01 | 2497.02 | not significant |
| 6842 | FLJ44635  | 1.03 | 7.34E-01 | 7.93E-01 | 85.67   | not significant |
| 6843 | ENY2      | 1.03 | 3.30E-01 | 4.21E-01 | 3712.99 | not significant |
| 6844 | EDF1      | 1.03 | 3.68E-01 | 4.60E-01 | 3134.48 | not significant |
| 6845 | NTNG2     | 1.03 | 7.28E-01 | 7.89E-01 | 34.68   | not significant |
| 6846 | MCRS1     | 1.03 | 3.32E-01 | 4.24E-01 | 3601.24 | not significant |
| 6847 | ELMSAN1   | 1.03 | 4.15E-01 | 5.06E-01 | 1938.97 | not significant |
| 6848 | C19orf73  | 1.03 | 6.50E-01 | 7.24E-01 | 11.25   | not significant |
| 6849 | PATL2     | 1.03 | 7.23E-01 | 7.85E-01 | 29.19   | not significant |
| 6850 | PIGC      | 1.03 | 4.64E-01 | 5.55E-01 | 1284.58 | not significant |
| 6851 | PPM1G     | 1.03 | 2.08E-01 | 2.86E-01 | 9455.71 | not significant |
| 6852 | APBA3     | 1.03 | 5.41E-01 | 6.28E-01 | 696.27  | not significant |

|      |              |      |          |          |          |                 |
|------|--------------|------|----------|----------|----------|-----------------|
| 6853 | SLC35D2      | 1.03 | 6.49E-01 | 7.23E-01 | 11.76    | not significant |
| 6854 | PIK3CD       | 1.03 | 2.20E-01 | 3.01E-01 | 4953.53  | not significant |
| 6855 | TKT          | 1.03 | 2.39E-01 | 3.21E-01 | 7991.13  | not significant |
| 6856 | CES2         | 1.03 | 4.46E-01 | 5.38E-01 | 1396.11  | not significant |
| 6857 | LOC101927391 | 1.03 | 6.61E-01 | 7.33E-01 | 14.07    | not significant |
| 6858 | ENPP1        | 1.03 | 7.27E-01 | 7.88E-01 | 40.02    | not significant |
| 6859 | CLASP1       | 1.03 | 3.45E-01 | 4.36E-01 | 3409.67  | not significant |
| 6860 | PTCH2        | 1.03 | 6.73E-01 | 7.43E-01 | 15.42    | not significant |
| 6861 | GPR108       | 1.03 | 4.08E-01 | 5.00E-01 | 1660.90  | not significant |
| 6862 | SLC26A2      | 1.03 | 4.67E-01 | 5.58E-01 | 1155.47  | not significant |
| 6863 | KAT8         | 1.03 | 4.39E-01 | 5.31E-01 | 1443.85  | not significant |
| 6864 | ZFC3H1       | 1.03 | 6.71E-01 | 7.41E-01 | 3825.78  | not significant |
| 6865 | CAMTA2       | 1.03 | 4.56E-01 | 5.48E-01 | 1269.19  | not significant |
| 6866 | NFE2L1       | 1.03 | 2.28E-01 | 3.09E-01 | 4536.86  | not significant |
| 6867 | SMARCB1      | 1.03 | 3.31E-01 | 4.22E-01 | 3816.14  | not significant |
| 6868 | NUDT3        | 1.03 | 6.79E-01 | 7.48E-01 | 214.67   | not significant |
| 6869 | SPRED3       | 1.03 | 6.56E-01 | 7.28E-01 | 12.89    | not significant |
| 6870 | LIN37        | 1.03 | 6.94E-01 | 7.61E-01 | 189.88   | not significant |
| 6871 | N6AMT1       | 1.03 | 6.74E-01 | 7.43E-01 | 224.90   | not significant |
| 6872 | UBLCP1       | 1.03 | 4.33E-01 | 5.25E-01 | 1911.17  | not significant |
| 6873 | NPM3         | 1.03 | 4.32E-01 | 5.24E-01 | 1760.91  | not significant |
| 6874 | GAMT         | 1.03 | 3.76E-01 | 4.68E-01 | 2100.86  | not significant |
| 6875 | ATP6V0C      | 1.03 | 3.96E-01 | 4.87E-01 | 3963.51  | not significant |
| 6876 | C15orf62     | 1.03 | 7.21E-01 | 7.84E-01 | 37.21    | not significant |
| 6877 | GPATCH1      | 1.03 | 5.14E-01 | 6.03E-01 | 738.90   | not significant |
| 6878 | PIAS2        | 1.03 | 4.26E-01 | 5.18E-01 | 1228.44  | not significant |
| 6879 | GJC2         | 1.03 | 7.16E-01 | 7.79E-01 | 40.53    | not significant |
| 6880 | MEPCE        | 1.03 | 2.59E-01 | 3.45E-01 | 3474.59  | not significant |
| 6881 | PAK1         | 1.03 | 3.35E-01 | 4.26E-01 | 2827.48  | not significant |
| 6882 | LATS1        | 1.03 | 4.01E-01 | 4.93E-01 | 1568.74  | not significant |
| 6883 | EMILIN2      | 1.03 | 5.32E-01 | 6.20E-01 | 704.89   | not significant |
| 6884 | ATF2         | 1.03 | 2.20E-01 | 3.00E-01 | 5327.26  | not significant |
| 6885 | SLC16A1-AS1  | 1.03 | 6.93E-01 | 7.60E-01 | 150.29   | not significant |
| 6886 | TRIM41       | 1.03 | 3.06E-01 | 3.95E-01 | 2553.14  | not significant |
| 6887 | C7orf31      | 1.03 | 5.42E-01 | 6.28E-01 | 581.51   | not significant |
| 6888 | TATDN2       | 1.03 | 3.23E-01 | 4.14E-01 | 4820.32  | not significant |
| 6889 | ADRBK2       | 1.03 | 2.12E-01 | 2.91E-01 | 16406.70 | not significant |
| 6890 | MSANTD4      | 1.03 | 5.08E-01 | 5.97E-01 | 778.71   | not significant |
| 6891 | GINS3        | 1.03 | 3.76E-01 | 4.68E-01 | 1605.83  | not significant |
| 6892 | SMARCD1      | 1.03 | 1.88E-01 | 2.63E-01 | 10275.09 | not significant |
| 6893 | PTPN6        | 1.03 | 4.02E-01 | 4.93E-01 | 1484.61  | not significant |
| 6894 | LOC100506474 | 1.03 | 7.18E-01 | 7.81E-01 | 71.50    | not significant |
| 6895 | KATNAL1      | 1.03 | 4.81E-01 | 5.72E-01 | 1021.07  | not significant |
| 6896 | IMMP2L       | 1.03 | 6.48E-01 | 7.23E-01 | 249.29   | not significant |
| 6897 | EPM2A        | 1.03 | 4.85E-01 | 5.75E-01 | 987.48   | not significant |
| 6898 | HIST1H3G     | 1.03 | 6.89E-01 | 7.56E-01 | 21.99    | not significant |
| 6899 | ARMC6        | 1.03 | 2.91E-01 | 3.79E-01 | 2881.98  | not significant |
| 6900 | ZNF140       | 1.03 | 5.40E-01 | 6.26E-01 | 639.16   | not significant |
| 6901 | ZNHIT2       | 1.03 | 6.82E-01 | 7.51E-01 | 194.17   | not significant |
| 6902 | ASB7         | 1.03 | 5.16E-01 | 6.04E-01 | 735.90   | not significant |
| 6903 | CDK17        | 1.03 | 3.38E-01 | 4.29E-01 | 2398.07  | not significant |
| 6904 | MAN2C1       | 1.03 | 6.81E-01 | 7.50E-01 | 814.37   | not significant |
| 6905 | PRDM4        | 1.03 | 3.60E-01 | 4.52E-01 | 1740.72  | not significant |
| 6906 | BTBD1        | 1.03 | 2.94E-01 | 3.83E-01 | 3199.89  | not significant |
| 6907 | PGAP1        | 1.03 | 5.37E-01 | 6.24E-01 | 893.56   | not significant |
| 6908 | PRPF4B       | 1.03 | 2.85E-01 | 3.73E-01 | 6199.32  | not significant |
| 6909 | SOAT2        | 1.03 | 6.27E-01 | 7.04E-01 | 289.65   | not significant |
| 6910 | SEC24B       | 1.03 | 3.37E-01 | 4.28E-01 | 2064.30  | not significant |
| 6911 | SEMA4D       | 1.03 | 1.89E-01 | 2.63E-01 | 7952.50  | not significant |
| 6912 | CERS6-AS1    | 1.03 | 6.44E-01 | 7.19E-01 | 13.76    | not significant |
| 6913 | PRDM10       | 1.03 | 5.21E-01 | 6.10E-01 | 712.14   | not significant |
| 6914 | KLC2         | 1.03 | 3.53E-01 | 4.45E-01 | 2309.15  | not significant |
| 6915 | ZNF771       | 1.03 | 6.98E-01 | 7.63E-01 | 142.48   | not significant |
| 6916 | NCF2         | 1.03 | 6.42E-01 | 7.17E-01 | 13.65    | not significant |
| 6917 | ZXDC         | 1.03 | 4.63E-01 | 5.55E-01 | 1208.29  | not significant |
| 6918 | PPP1R10      | 1.03 | 4.77E-01 | 5.68E-01 | 870.21   | not significant |
| 6919 | KIAA0391     | 1.03 | 3.48E-01 | 4.40E-01 | 1967.53  | not significant |
| 6920 | KLHDC7B      | 1.03 | 6.26E-01 | 7.02E-01 | 12.97    | not significant |
| 6921 | IL10RB       | 1.03 | 3.32E-01 | 4.24E-01 | 2204.01  | not significant |
| 6922 | PPM1B        | 1.03 | 3.40E-01 | 4.32E-01 | 2344.14  | not significant |
| 6923 | CMYA5        | 1.03 | 6.95E-01 | 7.61E-01 | 31.14    | not significant |
| 6924 | LETM2        | 1.03 | 6.40E-01 | 7.16E-01 | 240.69   | not significant |
| 6925 | HAUS8        | 1.03 | 5.34E-01 | 6.22E-01 | 910.11   | not significant |
| 6926 | GDAP1        | 1.03 | 4.49E-01 | 5.41E-01 | 1019.90  | not significant |
| 6927 | ZNF432       | 1.03 | 6.41E-01 | 7.16E-01 | 272.15   | not significant |
| 6928 | SUZ12        | 1.03 | 2.18E-01 | 2.97E-01 | 6699.89  | not significant |
| 6929 | NRIP3        | 1.03 | 5.90E-01 | 6.72E-01 | 9.82     | not significant |
| 6930 | CRIP1        | 1.03 | 5.05E-01 | 5.95E-01 | 705.81   | not significant |
| 6931 | KCTD13       | 1.03 | 5.29E-01 | 6.17E-01 | 618.86   | not significant |
| 6932 | CRYBB2P1     | 1.03 | 4.94E-01 | 5.84E-01 | 879.39   | not significant |
| 6933 | CASC10       | 1.03 | 6.69E-01 | 7.39E-01 | 18.80    | not significant |
| 6934 | THAP9        | 1.03 | 5.96E-01 | 6.76E-01 | 379.47   | not significant |
| 6935 | POMZP3       | 1.03 | 6.92E-01 | 7.59E-01 | 115.88   | not significant |
| 6936 | LNX2         | 1.03 | 4.55E-01 | 5.47E-01 | 940.13   | not significant |
| 6937 | ATP5E        | 1.03 | 6.90E-01 | 7.58E-01 | 108.13   | not significant |
| 6938 | FBXO33       | 1.03 | 3.54E-01 | 4.46E-01 | 1593.88  | not significant |
| 6939 | CATSPER2P1   | 1.03 | 6.52E-01 | 7.25E-01 | 16.17    | not significant |
| 6940 | CHCHD6       | 1.03 | 5.84E-01 | 6.66E-01 | 401.64   | not significant |

|      |           |      |          |          |          |                 |
|------|-----------|------|----------|----------|----------|-----------------|
| 6941 | KIAA0232  | 1.03 | 2.73E-01 | 3.60E-01 | 2669.74  | not significant |
| 6942 | RBM18     | 1.03 | 4.06E-01 | 4.97E-01 | 1135.54  | not significant |
| 6943 | IREB2     | 1.03 | 2.18E-01 | 2.97E-01 | 4221.73  | not significant |
| 6944 | ZNF749    | 1.03 | 5.96E-01 | 6.77E-01 | 431.83   | not significant |
| 6945 | UBE3D     | 1.03 | 6.51E-01 | 7.25E-01 | 209.10   | not significant |
| 6946 | ZGPAT     | 1.03 | 4.30E-01 | 5.22E-01 | 1214.64  | not significant |
| 6947 | ALDH3B2   | 1.03 | 7.06E-01 | 7.70E-01 | 59.31    | not significant |
| 6948 | PANK1     | 1.03 | 4.59E-01 | 5.51E-01 | 1002.70  | not significant |
| 6949 | COL9A3    | 1.03 | 7.06E-01 | 7.70E-01 | 62.62    | not significant |
| 6950 | STIL      | 1.03 | 2.34E-01 | 3.15E-01 | 3286.06  | not significant |
| 6951 | RBPJ      | 1.03 | 2.89E-01 | 3.78E-01 | 3295.21  | not significant |
| 6952 | TRIM11    | 1.03 | 3.93E-01 | 4.85E-01 | 1278.15  | not significant |
| 6953 | ZIC2      | 1.03 | 7.03E-01 | 7.68E-01 | 65.83    | not significant |
| 6954 | APOE      | 1.03 | 6.55E-01 | 7.28E-01 | 16.89    | not significant |
| 6955 | CCDC17    | 1.03 | 6.98E-01 | 7.64E-01 | 37.62    | not significant |
| 6956 | FAM206A   | 1.03 | 5.69E-01 | 6.53E-01 | 525.57   | not significant |
| 6957 | LINC01278 | 1.03 | 6.55E-01 | 7.28E-01 | 17.15    | not significant |
| 6958 | PQLC3     | 1.03 | 4.46E-01 | 5.39E-01 | 907.46   | not significant |
| 6959 | RRAGC     | 1.03 | 4.20E-01 | 5.12E-01 | 1309.27  | not significant |
| 6960 | MIR497HG  | 1.03 | 5.88E-01 | 6.69E-01 | 10.58    | not significant |
| 6961 | ZNF192P1  | 1.03 | 6.54E-01 | 7.27E-01 | 16.80    | not significant |
| 6962 | APTR      | 1.03 | 6.36E-01 | 7.11E-01 | 206.40   | not significant |
| 6963 | FBXO11    | 1.03 | 3.34E-01 | 4.26E-01 | 2201.96  | not significant |
| 6964 | TTC13     | 1.03 | 5.33E-01 | 6.21E-01 | 612.14   | not significant |
| 6965 | TTLL13    | 1.03 | 5.71E-01 | 6.54E-01 | 8.18     | not significant |
| 6966 | RNF138P1  | 1.03 | 6.56E-01 | 7.28E-01 | 17.49    | not significant |
| 6967 | RPE       | 1.03 | 3.50E-01 | 4.42E-01 | 1584.92  | not significant |
| 6968 | MAST2     | 1.03 | 2.82E-01 | 3.70E-01 | 2331.46  | not significant |
| 6969 | ZBTB25    | 1.03 | 6.07E-01 | 6.86E-01 | 318.43   | not significant |
| 6970 | HILPDA    | 1.03 | 4.48E-01 | 5.40E-01 | 926.58   | not significant |
| 6971 | OPA1      | 1.03 | 1.79E-01 | 2.51E-01 | 4974.26  | not significant |
| 6972 | FKBP15    | 1.03 | 4.31E-01 | 5.23E-01 | 1039.20  | not significant |
| 6973 | TRIM32    | 1.03 | 5.53E-01 | 6.39E-01 | 504.37   | not significant |
| 6974 | KLHL31    | 1.03 | 6.35E-01 | 7.11E-01 | 14.37    | not significant |
| 6975 | ANKRD22   | 1.03 | 6.94E-01 | 7.60E-01 | 85.95    | not significant |
| 6976 | RNF216P1  | 1.03 | 4.42E-01 | 5.34E-01 | 991.18   | not significant |
| 6977 | LAMC3     | 1.03 | 6.32E-01 | 7.08E-01 | 14.66    | not significant |
| 6978 | CAPN5     | 1.03 | 6.96E-01 | 7.62E-01 | 51.19    | not significant |
| 6979 | RNASE4    | 1.03 | 5.97E-01 | 6.77E-01 | 11.24    | not significant |
| 6980 | CCDC74B   | 1.03 | 6.86E-01 | 7.54E-01 | 31.26    | not significant |
| 6981 | PRKCI     | 1.03 | 2.73E-01 | 3.60E-01 | 2298.56  | not significant |
| 6982 | GSTZ1     | 1.03 | 5.68E-01 | 6.52E-01 | 426.43   | not significant |
| 6983 | KIAA1328  | 1.03 | 6.22E-01 | 6.99E-01 | 275.79   | not significant |
| 6984 | DUSP4     | 1.03 | 6.93E-01 | 7.60E-01 | 46.39    | not significant |
| 6985 | LINC01420 | 1.03 | 3.92E-01 | 4.84E-01 | 1166.48  | not significant |
| 6986 | ZNF444    | 1.03 | 3.78E-01 | 4.69E-01 | 1472.09  | not significant |
| 6987 | TTY14     | 1.03 | 6.55E-01 | 7.28E-01 | 19.67    | not significant |
| 6988 | C16orf58  | 1.03 | 3.41E-01 | 4.32E-01 | 1722.32  | not significant |
| 6989 | SCRIB     | 1.03 | 2.86E-01 | 3.74E-01 | 2130.50  | not significant |
| 6990 | RNF111    | 1.03 | 4.05E-01 | 4.97E-01 | 1047.08  | not significant |
| 6991 | CTH       | 1.03 | 6.21E-01 | 6.98E-01 | 15.00    | not significant |
| 6992 | DNAH17    | 1.03 | 6.87E-01 | 7.54E-01 | 86.90    | not significant |
| 6993 | CPSF4     | 1.03 | 2.92E-01 | 3.80E-01 | 2416.40  | not significant |
| 6994 | C1orf53   | 1.03 | 6.90E-01 | 7.58E-01 | 45.87    | not significant |
| 6995 | KIF3C     | 1.03 | 4.20E-01 | 5.12E-01 | 974.21   | not significant |
| 6996 | ZNF565    | 1.03 | 6.91E-01 | 7.58E-01 | 59.95    | not significant |
| 6997 | TAF1B     | 1.03 | 4.18E-01 | 5.10E-01 | 940.44   | not significant |
| 6998 | TFAP2E    | 1.03 | 6.84E-01 | 7.52E-01 | 84.57    | not significant |
| 6999 | CLK3      | 1.03 | 3.40E-01 | 4.31E-01 | 1648.59  | not significant |
| 7000 | ARPP19    | 1.03 | 1.38E-01 | 2.02E-01 | 9619.77  | not significant |
| 7001 | CD3D      | 1.03 | 1.74E-01 | 2.46E-01 | 14907.74 | not significant |
| 7002 | PLEKHF2   | 1.03 | 3.64E-01 | 4.56E-01 | 1299.62  | not significant |
| 7003 | STUB1     | 1.03 | 2.84E-01 | 3.72E-01 | 1983.51  | not significant |
| 7004 | PHF11     | 1.03 | 4.09E-01 | 5.01E-01 | 1321.44  | not significant |
| 7005 | USP36     | 1.03 | 2.34E-01 | 3.16E-01 | 4435.32  | not significant |
| 7006 | MAPK14    | 1.03 | 1.79E-01 | 2.51E-01 | 4452.18  | not significant |
| 7007 | PI4K2A    | 1.03 | 4.10E-01 | 5.02E-01 | 1108.79  | not significant |
| 7008 | FRG1B     | 1.03 | 4.13E-01 | 5.04E-01 | 1025.71  | not significant |
| 7009 | ABHD10    | 1.03 | 2.65E-01 | 3.51E-01 | 2273.50  | not significant |
| 7010 | PALM      | 1.03 | 6.82E-01 | 7.50E-01 | 90.55    | not significant |
| 7011 | NIT2      | 1.03 | 3.99E-01 | 4.91E-01 | 1024.10  | not significant |
| 7012 | SGK494    | 1.03 | 6.73E-01 | 7.43E-01 | 212.44   | not significant |
| 7013 | TMX3      | 1.03 | 2.09E-01 | 2.87E-01 | 3287.66  | not significant |
| 7014 | RHEB      | 1.03 | 3.15E-01 | 4.06E-01 | 1989.84  | not significant |
| 7015 | C14orf166 | 1.03 | 2.30E-01 | 3.12E-01 | 6433.42  | not significant |
| 7016 | KCNA6     | 1.03 | 6.68E-01 | 7.39E-01 | 29.13    | not significant |
| 7017 | FOXM1     | 1.03 | 1.20E-01 | 1.78E-01 | 7195.26  | not significant |
| 7018 | DMBT1     | 1.03 | 5.94E-01 | 6.74E-01 | 12.30    | not significant |
| 7019 | LINC01372 | 1.03 | 5.90E-01 | 6.72E-01 | 11.40    | not significant |
| 7020 | GSK3B     | 1.03 | 1.42E-01 | 2.07E-01 | 6820.80  | not significant |
| 7021 | ZNF286B   | 1.03 | 6.70E-01 | 7.41E-01 | 100.21   | not significant |
| 7022 | GIMAP1    | 1.03 | 2.43E-01 | 3.27E-01 | 5213.42  | not significant |
| 7023 | PIN4      | 1.03 | 4.91E-01 | 5.82E-01 | 581.06   | not significant |
| 7024 | PRG4      | 1.03 | 6.15E-01 | 6.93E-01 | 237.81   | not significant |
| 7025 | FLVCR2    | 1.03 | 6.46E-01 | 7.21E-01 | 23.43    | not significant |
| 7026 | ZNF540    | 1.03 | 6.80E-01 | 7.49E-01 | 63.55    | not significant |
| 7027 | THOC3     | 1.03 | 5.53E-01 | 6.39E-01 | 490.44   | not significant |
| 7028 | ITGB5     | 1.03 | 6.15E-01 | 6.93E-01 | 15.97    | not significant |



|      |              |      |          |          |          |                 |
|------|--------------|------|----------|----------|----------|-----------------|
| 7029 | OGFRP1       | 1.03 | 6.36E-01 | 7.11E-01 | 20.10    | not significant |
| 7030 | LOC100335030 | 1.03 | 6.42E-01 | 7.17E-01 | 21.34    | not significant |
| 7031 | YEATS4       | 1.03 | 2.32E-01 | 3.14E-01 | 2730.93  | not significant |
| 7032 | XKR9         | 1.03 | 5.58E-01 | 6.43E-01 | 9.49     | not significant |
| 7033 | MARK2        | 1.03 | 2.04E-01 | 2.81E-01 | 3168.81  | not significant |
| 7034 | ETV5         | 1.03 | 6.73E-01 | 7.43E-01 | 69.65    | not significant |
| 7035 | POLR2G       | 1.03 | 2.70E-01 | 3.56E-01 | 3186.02  | not significant |
| 7036 | SLC1A4       | 1.03 | 1.06E-01 | 1.61E-01 | 7760.13  | not significant |
| 7037 | SETD5        | 1.03 | 2.48E-01 | 3.32E-01 | 5097.22  | not significant |
| 7038 | GSTO1        | 1.03 | 2.65E-01 | 3.51E-01 | 2476.87  | not significant |
| 7039 | RNASEH2B-AS1 | 1.03 | 6.26E-01 | 7.03E-01 | 17.54    | not significant |
| 7040 | PLA2G15      | 1.03 | 5.72E-01 | 6.56E-01 | 337.21   | not significant |
| 7041 | SURF4        | 1.03 | 4.16E-01 | 5.07E-01 | 831.08   | not significant |
| 7042 | ANO10        | 1.03 | 5.78E-01 | 6.61E-01 | 11.18    | not significant |
| 7043 | NDUFAF7      | 1.03 | 4.62E-01 | 5.54E-01 | 647.47   | not significant |
| 7044 | GPM3         | 1.03 | 5.80E-01 | 6.63E-01 | 276.64   | not significant |
| 7045 | SOWAHA       | 1.03 | 6.51E-01 | 7.25E-01 | 127.97   | not significant |
| 7046 | PWWP2A       | 1.03 | 3.71E-01 | 4.63E-01 | 1064.11  | not significant |
| 7047 | MORC4        | 1.03 | 4.80E-01 | 5.71E-01 | 607.37   | not significant |
| 7048 | PPIL3        | 1.03 | 3.29E-01 | 4.20E-01 | 1380.46  | not significant |
| 7049 | ZNF621       | 1.03 | 5.35E-01 | 6.22E-01 | 402.56   | not significant |
| 7050 | PPT1         | 1.03 | 1.54E-01 | 2.22E-01 | 7173.95  | not significant |
| 7051 | ADAR         | 1.03 | 1.46E-01 | 2.11E-01 | 17662.44 | not significant |
| 7052 | ARIH1        | 1.03 | 1.96E-01 | 2.72E-01 | 2902.57  | not significant |
| 7053 | ASAP1        | 1.03 | 2.54E-01 | 3.39E-01 | 2154.58  | not significant |
| 7054 | ZC3H14       | 1.03 | 2.28E-01 | 3.09E-01 | 2414.18  | not significant |
| 7055 | RPRD1B       | 1.03 | 1.89E-01 | 2.64E-01 | 3049.42  | not significant |
| 7056 | ZMYM6        | 1.03 | 4.46E-01 | 5.38E-01 | 873.53   | not significant |
| 7057 | SYNPO2       | 1.03 | 6.69E-01 | 7.39E-01 | 57.06    | not significant |
| 7058 | ABRACL       | 1.03 | 1.51E-01 | 2.17E-01 | 5248.30  | not significant |
| 7059 | CRHR1-IT1    | 1.03 | 6.57E-01 | 7.29E-01 | 31.26    | not significant |
| 7060 | RLF          | 1.03 | 3.41E-01 | 4.32E-01 | 1155.23  | not significant |
| 7061 | LRP10        | 1.03 | 3.43E-01 | 4.34E-01 | 1429.83  | not significant |
| 7062 | HADHA        | 1.03 | 1.20E-01 | 1.78E-01 | 7970.44  | not significant |
| 7063 | GAL3ST3      | 1.03 | 5.42E-01 | 6.28E-01 | 9.20     | not significant |
| 7064 | CPT1B        | 1.03 | 6.67E-01 | 7.38E-01 | 56.84    | not significant |
| 7065 | SLC35C2      | 1.03 | 2.87E-01 | 3.76E-01 | 1902.26  | not significant |
| 7066 | C11orf54     | 1.03 | 3.74E-01 | 4.66E-01 | 1043.00  | not significant |
| 7067 | TOLLIP       | 1.03 | 2.83E-01 | 3.70E-01 | 1623.10  | not significant |
| 7068 | ZNF233       | 1.03 | 6.63E-01 | 7.35E-01 | 37.73    | not significant |
| 7069 | SNHG20       | 1.03 | 5.96E-01 | 6.76E-01 | 336.31   | not significant |
| 7070 | ANKRD31      | 1.03 | 6.26E-01 | 7.03E-01 | 20.71    | not significant |
| 7071 | LINC00880    | 1.03 | 5.27E-01 | 6.16E-01 | 8.93     | not significant |
| 7072 | TRIM14       | 1.03 | 1.20E-01 | 1.79E-01 | 5707.60  | not significant |
| 7073 | PPAN         | 1.03 | 5.96E-01 | 6.76E-01 | 206.78   | not significant |
| 7074 | TMEM191A     | 1.03 | 5.35E-01 | 6.23E-01 | 8.74     | not significant |
| 7075 | CCDC112      | 1.03 | 4.59E-01 | 5.50E-01 | 592.41   | not significant |
| 7076 | ZNF582-AS1   | 1.03 | 6.62E-01 | 7.34E-01 | 76.64    | not significant |
| 7077 | ZFYVE19      | 1.03 | 4.21E-01 | 5.12E-01 | 769.49   | not significant |
| 7078 | DNLZ         | 1.03 | 4.71E-01 | 5.62E-01 | 562.90   | not significant |
| 7079 | CATSPERB     | 1.03 | 5.68E-01 | 6.52E-01 | 12.38    | not significant |
| 7080 | NOMO3        | 1.03 | 6.44E-01 | 7.19E-01 | 112.79   | not significant |
| 7081 | CHD2         | 1.03 | 2.72E-01 | 3.58E-01 | 2699.33  | not significant |
| 7082 | SLC12A5      | 1.03 | 6.43E-01 | 7.18E-01 | 33.56    | not significant |
| 7083 | IFI16        | 1.03 | 1.28E-01 | 1.89E-01 | 13561.91 | not significant |
| 7084 | WDR47        | 1.03 | 4.72E-01 | 5.63E-01 | 544.36   | not significant |
| 7085 | LOC101927365 | 1.03 | 6.42E-01 | 7.17E-01 | 117.77   | not significant |
| 7086 | HIVEP1       | 1.03 | 5.74E-01 | 6.57E-01 | 275.65   | not significant |
| 7087 | PSTPIP1      | 1.03 | 5.24E-01 | 6.12E-01 | 479.60   | not significant |
| 7088 | SMURF1       | 1.03 | 4.47E-01 | 5.40E-01 | 691.06   | not significant |
| 7089 | CD247        | 1.03 | 1.85E-01 | 2.59E-01 | 8442.75  | not significant |
| 7090 | GPR135       | 1.03 | 5.93E-01 | 6.74E-01 | 14.86    | not significant |
| 7091 | ELL          | 1.03 | 3.60E-01 | 4.52E-01 | 987.02   | not significant |
| 7092 | KMT2B        | 1.03 | 5.18E-01 | 6.07E-01 | 3250.69  | not significant |
| 7093 | KNTC1        | 1.03 | 5.55E-01 | 6.40E-01 | 8029.90  | not significant |
| 7094 | ZDHHC9       | 1.03 | 4.37E-01 | 5.29E-01 | 703.91   | not significant |
| 7095 | SP2          | 1.03 | 2.74E-01 | 3.60E-01 | 1601.81  | not significant |
| 7096 | TMEM185B     | 1.03 | 2.06E-01 | 2.83E-01 | 2516.35  | not significant |
| 7097 | DOCK9-AS2    | 1.03 | 6.21E-01 | 6.98E-01 | 21.88    | not significant |
| 7098 | PPP2CB       | 1.03 | 2.69E-01 | 3.55E-01 | 2465.40  | not significant |
| 7099 | CCDC102B     | 1.03 | 6.59E-01 | 7.32E-01 | 56.94    | not significant |
| 7100 | FAM178A      | 1.03 | 2.46E-01 | 3.29E-01 | 3704.63  | not significant |
| 7101 | FBXO21       | 1.03 | 2.21E-01 | 3.01E-01 | 2211.37  | not significant |
| 7102 | PRMT2        | 1.03 | 2.58E-01 | 3.42E-01 | 1731.38  | not significant |
| 7103 | PIP4K2A      | 1.03 | 1.15E-01 | 1.72E-01 | 5840.27  | not significant |
| 7104 | TEX21P       | 1.03 | 4.85E-01 | 5.76E-01 | 8.41     | not significant |
| 7105 | ZNF687       | 1.03 | 3.14E-01 | 4.04E-01 | 1337.08  | not significant |
| 7106 | ARNT         | 1.03 | 2.58E-01 | 3.43E-01 | 1751.98  | not significant |
| 7107 | KIAA0556     | 1.03 | 4.80E-01 | 5.71E-01 | 490.10   | not significant |
| 7108 | CRNKL1       | 1.03 | 2.49E-01 | 3.32E-01 | 1751.50  | not significant |
| 7109 | PHEX         | 1.03 | 6.41E-01 | 7.16E-01 | 29.49    | not significant |
| 7110 | HDGFRP2      | 1.03 | 2.14E-01 | 2.93E-01 | 3250.32  | not significant |
| 7111 | SMCO4        | 1.03 | 6.53E-01 | 7.27E-01 | 40.31    | not significant |
| 7112 | SLC30A5      | 1.03 | 1.56E-01 | 2.24E-01 | 3325.54  | not significant |
| 7113 | FAHD1        | 1.03 | 4.85E-01 | 5.75E-01 | 487.37   | not significant |
| 7114 | DSN1         | 1.03 | 1.75E-01 | 2.47E-01 | 2819.14  | not significant |
| 7115 | FAT1         | 1.03 | 1.80E-01 | 2.54E-01 | 8289.19  | not significant |
| 7116 | PSENNEN      | 1.03 | 4.61E-01 | 5.53E-01 | 728.97   | not significant |

|      |              |      |          |          |          |                 |
|------|--------------|------|----------|----------|----------|-----------------|
| 7117 | RCN1         | 1.03 | 3.12E-01 | 4.03E-01 | 1391.35  | not significant |
| 7118 | GMCL1        | 1.04 | 2.16E-01 | 2.96E-01 | 2168.76  | not significant |
| 7119 | ALMS1-IT1    | 1.04 | 6.38E-01 | 7.14E-01 | 29.36    | not significant |
| 7120 | CD53         | 1.04 | 1.79E-01 | 2.52E-01 | 4515.46  | not significant |
| 7121 | PHF8         | 1.04 | 4.37E-01 | 5.29E-01 | 596.15   | not significant |
| 7122 | PCNT         | 1.04 | 2.62E-01 | 3.47E-01 | 3145.70  | not significant |
| 7123 | IRF2BP1      | 1.04 | 2.55E-01 | 3.40E-01 | 1974.50  | not significant |
| 7124 | EIF4EBP2     | 1.04 | 8.86E-02 | 1.37E-01 | 13206.21 | not significant |
| 7125 | SNX12        | 1.04 | 3.92E-01 | 4.84E-01 | 964.74   | not significant |
| 7126 | PRICKLE3     | 1.04 | 6.47E-01 | 7.21E-01 | 45.01    | not significant |
| 7127 | LCMT1-AS1    | 1.04 | 6.33E-01 | 7.09E-01 | 29.15    | not significant |
| 7128 | ZNFX1        | 1.04 | 3.39E-01 | 4.30E-01 | 1980.44  | not significant |
| 7129 | SAMD9        | 1.04 | 1.47E-01 | 2.13E-01 | 3349.63  | not significant |
| 7130 | RMND5A       | 1.04 | 1.31E-01 | 1.93E-01 | 5471.28  | not significant |
| 7131 | NRN1L        | 1.04 | 5.00E-01 | 5.90E-01 | 8.68     | not significant |
| 7132 | PROSER3      | 1.04 | 4.80E-01 | 5.71E-01 | 534.15   | not significant |
| 7133 | C2orf49      | 1.04 | 2.63E-01 | 3.49E-01 | 1606.87  | not significant |
| 7134 | ELP6         | 1.04 | 2.72E-01 | 3.58E-01 | 1679.87  | not significant |
| 7135 | COLQ         | 1.04 | 6.51E-01 | 7.25E-01 | 51.49    | not significant |
| 7136 | AP1TD1       | 1.04 | 6.17E-01 | 6.95E-01 | 143.91   | not significant |
| 7137 | SETDB2       | 1.04 | 3.70E-01 | 4.62E-01 | 866.85   | not significant |
| 7138 | EIF4EBP3     | 1.04 | 5.63E-01 | 6.47E-01 | 13.41    | not significant |
| 7139 | ZNF138       | 1.04 | 3.37E-01 | 4.28E-01 | 1195.56  | not significant |
| 7140 | ALKBH4       | 1.04 | 4.49E-01 | 5.41E-01 | 560.73   | not significant |
| 7141 | HNRNPDL      | 1.04 | 8.99E-02 | 1.39E-01 | 16162.28 | not significant |
| 7142 | PPP2R5C      | 1.04 | 1.16E-01 | 1.74E-01 | 6205.94  | not significant |
| 7143 | SLC16A6      | 1.04 | 5.66E-01 | 6.50E-01 | 13.70    | not significant |
| 7144 | FOXO3B       | 1.04 | 4.83E-01 | 5.73E-01 | 510.09   | not significant |
| 7145 | TSTD3        | 1.04 | 6.32E-01 | 7.08E-01 | 29.95    | not significant |
| 7146 | LINC01001    | 1.04 | 5.52E-01 | 6.38E-01 | 11.94    | not significant |
| 7147 | LOC101928103 | 1.04 | 6.34E-01 | 7.10E-01 | 102.07   | not significant |
| 7148 | APPBP2       | 1.04 | 1.78E-01 | 2.51E-01 | 2805.07  | not significant |
| 7149 | RTCB         | 1.04 | 1.92E-01 | 2.67E-01 | 3414.97  | not significant |
| 7150 | PHRF1        | 1.04 | 1.66E-01 | 2.37E-01 | 3858.70  | not significant |
| 7151 | FAHD2A       | 1.04 | 3.88E-01 | 4.81E-01 | 744.92   | not significant |
| 7152 | PLCB3        | 1.04 | 4.47E-01 | 5.39E-01 | 582.30   | not significant |
| 7153 | AOAH         | 1.04 | 6.45E-01 | 7.20E-01 | 54.59    | not significant |
| 7154 | UBN2         | 1.04 | 3.39E-01 | 4.30E-01 | 1201.33  | not significant |
| 7155 | POLR2J4      | 1.04 | 5.49E-01 | 6.35E-01 | 337.43   | not significant |
| 7156 | BOD1L1       | 1.04 | 2.62E-01 | 3.48E-01 | 3128.59  | not significant |
| 7157 | PRX          | 1.04 | 6.30E-01 | 7.06E-01 | 109.47   | not significant |
| 7158 | SRRM2        | 1.04 | 5.54E-01 | 6.39E-01 | 29892.15 | not significant |
| 7159 | KIAA0247     | 1.04 | 2.54E-01 | 3.38E-01 | 1697.87  | not significant |
| 7160 | ZNF410       | 1.04 | 2.41E-01 | 3.24E-01 | 1856.95  | not significant |
| 7161 | MAP1S        | 1.04 | 2.43E-01 | 3.27E-01 | 1713.44  | not significant |
| 7162 | KBTBD2       | 1.04 | 2.15E-01 | 2.94E-01 | 2282.61  | not significant |
| 7163 | AMACR        | 1.04 | 6.23E-01 | 7.00E-01 | 29.91    | not significant |
| 7164 | ANKRD54      | 1.04 | 3.93E-01 | 4.85E-01 | 720.49   | not significant |
| 7165 | NRSN2        | 1.04 | 6.41E-01 | 7.16E-01 | 54.57    | not significant |
| 7166 | DYNC1H1      | 1.04 | 6.32E-01 | 7.08E-01 | 9939.20  | not significant |
| 7167 | LOC652276    | 1.04 | 6.33E-01 | 7.09E-01 | 90.39    | not significant |
| 7168 | CCDC153      | 1.04 | 5.11E-01 | 6.00E-01 | 10.12    | not significant |
| 7169 | KIAA0825     | 1.04 | 6.25E-01 | 7.02E-01 | 32.32    | not significant |
| 7170 | DND1         | 1.04 | 6.27E-01 | 7.03E-01 | 34.19    | not significant |
| 7171 | POPDC2       | 1.04 | 6.05E-01 | 6.85E-01 | 24.26    | not significant |
| 7172 | AKIP1        | 1.04 | 4.52E-01 | 5.44E-01 | 574.80   | not significant |
| 7173 | C1orf56      | 1.04 | 6.26E-01 | 7.03E-01 | 34.21    | not significant |
| 7174 | ADNP         | 1.04 | 8.13E-02 | 1.27E-01 | 6170.53  | not significant |
| 7175 | ATP13A2      | 1.04 | 2.57E-01 | 3.42E-01 | 1839.72  | not significant |
| 7176 | SQSTM1       | 1.04 | 2.37E-01 | 3.20E-01 | 1894.12  | not significant |
| 7177 | ADAP2        | 1.04 | 4.75E-01 | 5.66E-01 | 8.54     | not significant |
| 7178 | RPEL1        | 1.04 | 5.00E-01 | 5.90E-01 | 9.77     | not significant |
| 7179 | MFAP4        | 1.04 | 2.16E-01 | 2.95E-01 | 1939.51  | not significant |
| 7180 | IBTK         | 1.04 | 1.61E-01 | 2.30E-01 | 3146.40  | not significant |
| 7181 | LEF1         | 1.04 | 5.22E-02 | 8.63E-02 | 26364.27 | not significant |
| 7182 | SIDT2        | 1.04 | 4.83E-01 | 5.73E-01 | 401.69   | not significant |
| 7183 | PLCL2        | 1.04 | 2.27E-01 | 3.09E-01 | 1852.63  | not significant |
| 7184 | COX16        | 1.04 | 6.28E-01 | 7.04E-01 | 148.28   | not significant |
| 7185 | LEMD2        | 1.04 | 1.88E-01 | 2.62E-01 | 2617.40  | not significant |
| 7186 | LGALS3BP     | 1.04 | 7.75E-02 | 1.22E-01 | 9551.72  | not significant |
| 7187 | SMARCA5-AS1  | 1.04 | 5.78E-01 | 6.62E-01 | 20.85    | not significant |
| 7188 | SF3A1        | 1.04 | 7.86E-02 | 1.24E-01 | 8161.02  | not significant |
| 7189 | CLOCK        | 1.04 | 4.45E-01 | 5.37E-01 | 549.80   | not significant |
| 7190 | RNF5P1       | 1.04 | 5.78E-01 | 6.62E-01 | 18.43    | not significant |
| 7191 | ZNF318       | 1.04 | 2.35E-01 | 3.17E-01 | 2211.32  | not significant |
| 7192 | CCDC174      | 1.04 | 3.47E-01 | 4.39E-01 | 916.27   | not significant |
| 7193 | SPIRE1       | 1.04 | 4.79E-01 | 5.70E-01 | 8.92     | not significant |
| 7194 | FOKK1        | 1.04 | 2.06E-01 | 2.84E-01 | 2338.39  | not significant |
| 7195 | RWDD2A       | 1.04 | 6.15E-01 | 6.93E-01 | 110.40   | not significant |
| 7196 | SMS          | 1.04 | 1.54E-01 | 2.21E-01 | 3847.40  | not significant |
| 7197 | SNRNP48      | 1.04 | 1.14E-01 | 1.70E-01 | 4327.54  | not significant |
| 7198 | TLK1         | 1.04 | 1.30E-01 | 1.91E-01 | 4511.24  | not significant |
| 7199 | HPGD         | 1.04 | 5.92E-01 | 6.73E-01 | 145.66   | not significant |
| 7200 | TTC16        | 1.04 | 5.34E-01 | 6.22E-01 | 400.80   | not significant |
| 7201 | MYC          | 1.04 | 5.59E-02 | 9.16E-02 | 11612.71 | not significant |
| 7202 | HAR1B        | 1.04 | 6.05E-01 | 6.84E-01 | 26.79    | not significant |
| 7203 | FLVCR1-AS1   | 1.04 | 6.23E-01 | 7.00E-01 | 42.09    | not significant |
| 7204 | LIG4         | 1.04 | 1.23E-01 | 1.83E-01 | 3635.40  | not significant |

|      |               |      |          |          |          |                 |
|------|---------------|------|----------|----------|----------|-----------------|
| 7205 | UBE2J1        | 1.04 | 1.54E-01 | 2.21E-01 | 2783.34  | not significant |
| 7206 | C1QTNF3-AMACR | 1.04 | 4.93E-01 | 5.83E-01 | 10.13    | not significant |
| 7207 | RBM19         | 1.04 | 1.81E-01 | 2.54E-01 | 2337.91  | not significant |
| 7208 | SRRM2-AS1     | 1.04 | 5.33E-01 | 6.21E-01 | 13.30    | not significant |
| 7209 | ANKRD24       | 1.04 | 4.79E-01 | 5.70E-01 | 9.77     | not significant |
| 7210 | DDX23         | 1.04 | 7.63E-02 | 1.21E-01 | 11966.15 | not significant |
| 7211 | ZNF394        | 1.04 | 4.07E-01 | 4.99E-01 | 599.08   | not significant |
| 7212 | TTC7A         | 1.04 | 1.14E-01 | 1.71E-01 | 7947.72  | not significant |
| 7213 | NFRKB         | 1.04 | 1.78E-01 | 2.51E-01 | 2108.29  | not significant |
| 7214 | MBLAC1        | 1.04 | 6.20E-01 | 6.97E-01 | 76.23    | not significant |
| 7215 | HYLS1         | 1.04 | 5.26E-01 | 6.15E-01 | 254.88   | not significant |
| 7216 | ARPC1A        | 1.04 | 1.81E-01 | 2.55E-01 | 2558.72  | not significant |
| 7217 | SNX6          | 1.04 | 1.68E-01 | 2.39E-01 | 2443.86  | not significant |
| 7218 | ARMC1         | 1.04 | 8.50E-02 | 1.32E-01 | 4320.99  | not significant |
| 7219 | MPP1          | 1.04 | 2.44E-01 | 3.27E-01 | 1377.02  | not significant |
| 7220 | PAGE5         | 1.04 | 6.17E-01 | 6.94E-01 | 44.16    | not significant |
| 7221 | CETN2         | 1.04 | 5.96E-01 | 6.76E-01 | 114.83   | not significant |
| 7222 | MYOZ3         | 1.04 | 6.07E-01 | 6.86E-01 | 32.59    | not significant |
| 7223 | MTCL1         | 1.04 | 6.07E-01 | 6.86E-01 | 93.52    | not significant |
| 7224 | NAA60         | 1.04 | 1.65E-01 | 2.35E-01 | 2824.88  | not significant |
| 7225 | FBXO10        | 1.04 | 4.86E-01 | 5.76E-01 | 343.34   | not significant |
| 7226 | AKAP7         | 1.04 | 4.71E-01 | 5.62E-01 | 411.11   | not significant |
| 7227 | C7orf49       | 1.04 | 2.66E-01 | 3.52E-01 | 1855.27  | not significant |
| 7228 | UGT3A2        | 1.04 | 5.92E-01 | 6.73E-01 | 117.79   | not significant |
| 7229 | TMEM60        | 1.04 | 3.87E-01 | 4.80E-01 | 620.55   | not significant |
| 7230 | NPAT          | 1.04 | 2.16E-01 | 2.96E-01 | 2142.01  | not significant |
| 7231 | WDR66         | 1.04 | 5.42E-01 | 6.28E-01 | 15.18    | not significant |
| 7232 | AGPAT2        | 1.04 | 4.82E-01 | 5.73E-01 | 374.39   | not significant |
| 7233 | RPS6KA1       | 1.04 | 1.23E-01 | 1.82E-01 | 3939.78  | not significant |
| 7234 | LY86          | 1.04 | 4.64E-01 | 5.56E-01 | 8.61     | not significant |
| 7235 | ZNF580        | 1.04 | 3.95E-01 | 4.87E-01 | 714.93   | not significant |
| 7236 | IPO9-AS1      | 1.04 | 5.75E-01 | 6.59E-01 | 23.84    | not significant |
| 7237 | EML6          | 1.04 | 4.90E-01 | 5.81E-01 | 317.61   | not significant |
| 7238 | IKBKG         | 1.04 | 5.92E-01 | 6.73E-01 | 112.93   | not significant |
| 7239 | DYNLT3        | 1.04 | 5.98E-01 | 6.78E-01 | 30.84    | not significant |
| 7240 | MX1           | 1.04 | 5.50E-01 | 6.36E-01 | 216.47   | not significant |
| 7241 | PSMB5         | 1.04 | 2.66E-01 | 3.52E-01 | 1337.58  | not significant |
| 7242 | TUSC3         | 1.04 | 2.23E-01 | 3.03E-01 | 1836.57  | not significant |
| 7243 | ZSWIM5        | 1.04 | 5.79E-01 | 6.62E-01 | 145.55   | not significant |
| 7244 | ALKBH6        | 1.04 | 4.65E-01 | 5.56E-01 | 381.69   | not significant |
| 7245 | FBXL5         | 1.04 | 1.91E-01 | 2.66E-01 | 1747.94  | not significant |
| 7246 | GALNT7        | 1.04 | 1.53E-01 | 2.21E-01 | 2561.91  | not significant |
| 7247 | PSPN          | 1.04 | 5.07E-01 | 5.97E-01 | 11.73    | not significant |
| 7248 | LOC101929057  | 1.04 | 6.09E-01 | 6.88E-01 | 49.23    | not significant |
| 7249 | PTBP3         | 1.04 | 7.98E-02 | 1.25E-01 | 9532.88  | not significant |
| 7250 | MKL2          | 1.04 | 2.19E-01 | 2.99E-01 | 1859.49  | not significant |
| 7251 | YEATS2        | 1.04 | 8.86E-02 | 1.37E-01 | 5348.95  | not significant |
| 7252 | MYO18A        | 1.04 | 1.31E-01 | 1.92E-01 | 4539.46  | not significant |
| 7253 | SUV420H1      | 1.04 | 2.17E-01 | 2.96E-01 | 1656.91  | not significant |
| 7254 | JAK1          | 1.04 | 8.41E-02 | 1.31E-01 | 5335.73  | not significant |
| 7255 | CAMKK2        | 1.04 | 7.76E-02 | 1.22E-01 | 5014.04  | not significant |
| 7256 | TMF1          | 1.04 | 2.29E-01 | 3.10E-01 | 1728.86  | not significant |
| 7257 | ZBTB44        | 1.04 | 1.11E-01 | 1.66E-01 | 6134.00  | not significant |
| 7258 | PANK2         | 1.04 | 2.23E-01 | 3.04E-01 | 1500.90  | not significant |
| 7259 | MYLK-AS1      | 1.04 | 6.07E-01 | 6.86E-01 | 64.37    | not significant |
| 7260 | SLC38A1       | 1.04 | 3.48E-02 | 6.02E-02 | 20729.32 | not significant |
| 7261 | ANP32A-IT1    | 1.04 | 5.27E-01 | 6.15E-01 | 16.21    | not significant |
| 7262 | PPM1L         | 1.04 | 5.82E-01 | 6.64E-01 | 153.46   | not significant |
| 7263 | SNAP47        | 1.04 | 3.18E-01 | 4.09E-01 | 846.03   | not significant |
| 7264 | ATG16L1       | 1.04 | 3.19E-01 | 4.10E-01 | 840.88   | not significant |
| 7265 | ABCB10        | 1.04 | 1.87E-01 | 2.61E-01 | 2277.57  | not significant |
| 7266 | LXN           | 1.04 | 5.78E-01 | 6.62E-01 | 118.65   | not significant |
| 7267 | SP1           | 1.04 | 1.02E-01 | 1.56E-01 | 6950.73  | not significant |
| 7268 | NUB1          | 1.04 | 6.87E-02 | 1.10E-01 | 5063.06  | not significant |
| 7269 | TOR1AIP1      | 1.04 | 1.03E-01 | 1.57E-01 | 3803.74  | not significant |
| 7270 | DFFB          | 1.04 | 4.83E-01 | 5.73E-01 | 328.43   | not significant |
| 7271 | SULT1A2       | 1.04 | 5.57E-01 | 6.42E-01 | 19.10    | not significant |
| 7272 | C12orf49      | 1.04 | 1.67E-01 | 2.37E-01 | 2126.55  | not significant |
| 7273 | HOXB4         | 1.04 | 3.74E-01 | 4.66E-01 | 806.95   | not significant |
| 7274 | SCOC          | 1.04 | 1.57E-01 | 2.26E-01 | 2500.53  | not significant |
| 7275 | MCM3AP-AS1    | 1.04 | 5.62E-01 | 6.46E-01 | 147.29   | not significant |
| 7276 | CWF19L2       | 1.04 | 3.55E-01 | 4.46E-01 | 647.97   | not significant |
| 7277 | WDYHV1        | 1.04 | 3.06E-01 | 3.95E-01 | 984.31   | not significant |
| 7278 | MALT1         | 1.04 | 2.29E-01 | 3.10E-01 | 1303.36  | not significant |
| 7279 | MGC12916      | 1.04 | 5.29E-01 | 6.17E-01 | 17.61    | not significant |
| 7280 | PPM1A         | 1.04 | 8.77E-02 | 1.36E-01 | 5036.37  | not significant |
| 7281 | PCDHGA11      | 1.04 | 5.95E-01 | 6.76E-01 | 45.69    | not significant |
| 7282 | ZNF2          | 1.04 | 5.03E-01 | 5.93E-01 | 246.42   | not significant |
| 7283 | HSD17B6       | 1.04 | 5.14E-01 | 6.03E-01 | 255.03   | not significant |
| 7284 | NUMB          | 1.04 | 7.72E-02 | 1.22E-01 | 3775.64  | not significant |
| 7285 | PINK1         | 1.04 | 4.64E-01 | 5.55E-01 | 387.72   | not significant |
| 7286 | AP4S1         | 1.04 | 3.78E-01 | 4.70E-01 | 573.09   | not significant |
| 7287 | RBM41         | 1.04 | 3.53E-01 | 4.45E-01 | 745.98   | not significant |
| 7288 | POLD1         | 1.04 | 8.26E-02 | 1.29E-01 | 5721.18  | not significant |
| 7289 | KAT5          | 1.04 | 1.92E-01 | 2.68E-01 | 1753.17  | not significant |
| 7290 | LOC100289511  | 1.04 | 5.38E-01 | 6.25E-01 | 22.74    | not significant |
| 7291 | ZNF572        | 1.04 | 5.83E-01 | 6.65E-01 | 31.75    | not significant |
| 7292 | CIAO1         | 1.04 | 9.39E-02 | 1.44E-01 | 3978.35  | not significant |

|      |              |      |          |          |          |                 |
|------|--------------|------|----------|----------|----------|-----------------|
| 7293 | PRKXP1       | 1.04 | 5.16E-01 | 6.04E-01 | 284.45   | not significant |
| 7294 | KIAA1429     | 1.04 | 9.62E-02 | 1.47E-01 | 3452.62  | not significant |
| 7295 | GDPD5        | 1.04 | 2.56E-01 | 3.40E-01 | 1094.34  | not significant |
| 7296 | PTPLB        | 1.04 | 3.16E-01 | 4.06E-01 | 736.74   | not significant |
| 7297 | BLOC1S1      | 1.04 | 3.69E-01 | 4.60E-01 | 596.64   | not significant |
| 7298 | PPCDC        | 1.04 | 4.31E-01 | 5.23E-01 | 383.52   | not significant |
| 7299 | SERPINH1     | 1.04 | 5.84E-01 | 6.66E-01 | 87.99    | not significant |
| 7300 | DSCC1        | 1.04 | 1.40E-01 | 2.04E-01 | 2174.20  | not significant |
| 7301 | STK11        | 1.04 | 1.35E-01 | 1.98E-01 | 2803.52  | not significant |
| 7302 | FAM98C       | 1.04 | 5.24E-01 | 6.12E-01 | 187.66   | not significant |
| 7303 | PPP1R32      | 1.04 | 5.91E-01 | 6.72E-01 | 56.86    | not significant |
| 7304 | FIZ1         | 1.04 | 3.62E-01 | 4.54E-01 | 609.42   | not significant |
| 7305 | ABCB6        | 1.04 | 4.83E-01 | 5.74E-01 | 260.70   | not significant |
| 7306 | MAP4K4       | 1.04 | 3.27E-02 | 5.69E-02 | 9075.42  | not significant |
| 7307 | USP33        | 1.04 | 1.51E-01 | 2.18E-01 | 2594.61  | not significant |
| 7308 | LOC389247    | 1.04 | 5.10E-01 | 5.99E-01 | 14.50    | not significant |
| 7309 | ARFGAP2      | 1.04 | 1.06E-01 | 1.60E-01 | 3106.01  | not significant |
| 7310 | AK1          | 1.04 | 5.86E-01 | 6.67E-01 | 78.91    | not significant |
| 7311 | THADA        | 1.04 | 1.50E-01 | 2.16E-01 | 2162.14  | not significant |
| 7312 | LSMEM1       | 1.04 | 5.62E-01 | 6.47E-01 | 26.55    | not significant |
| 7313 | LOC148413    | 1.04 | 3.01E-01 | 3.90E-01 | 846.64   | not significant |
| 7314 | LINC00174    | 1.04 | 5.39E-01 | 6.26E-01 | 180.21   | not significant |
| 7315 | PTOV1        | 1.04 | 1.07E-01 | 1.61E-01 | 4188.74  | not significant |
| 7316 | AKAP9        | 1.04 | 1.54E-01 | 2.21E-01 | 3231.79  | not significant |
| 7317 | CACNB2       | 1.04 | 5.41E-01 | 6.27E-01 | 162.74   | not significant |
| 7318 | NSMAF        | 1.04 | 6.07E-02 | 9.84E-02 | 4079.26  | not significant |
| 7319 | CASKIN1      | 1.04 | 5.70E-01 | 6.54E-01 | 31.69    | not significant |
| 7320 | AGAP2-AS1    | 1.04 | 5.13E-01 | 6.01E-01 | 14.94    | not significant |
| 7321 | RNF169       | 1.04 | 1.41E-01 | 2.05E-01 | 1963.01  | not significant |
| 7322 | TUBA8        | 1.04 | 5.85E-01 | 6.67E-01 | 51.04    | not significant |
| 7323 | PRSS53       | 1.04 | 5.57E-01 | 6.42E-01 | 176.47   | not significant |
| 7324 | EMD          | 1.04 | 3.34E-01 | 4.25E-01 | 746.80   | not significant |
| 7325 | CCDC23       | 1.04 | 3.88E-01 | 4.81E-01 | 489.32   | not significant |
| 7326 | TMCC1        | 1.04 | 3.62E-01 | 4.54E-01 | 587.38   | not significant |
| 7327 | RNF103-CHMP3 | 1.04 | 4.22E-01 | 5.13E-01 | 8.85     | not significant |
| 7328 | FAM115A      | 1.04 | 2.79E-01 | 3.66E-01 | 919.56   | not significant |
| 7329 | SNRPE        | 1.04 | 2.44E-01 | 3.28E-01 | 1700.56  | not significant |
| 7330 | FAM151B      | 1.04 | 5.55E-01 | 6.40E-01 | 25.51    | not significant |
| 7331 | BCDIN3D-AS1  | 1.04 | 5.24E-01 | 6.12E-01 | 17.65    | not significant |
| 7332 | CD81         | 1.04 | 1.30E-01 | 1.91E-01 | 4961.03  | not significant |
| 7333 | RELA         | 1.04 | 9.37E-02 | 1.44E-01 | 2966.03  | not significant |
| 7334 | MED9         | 1.04 | 2.37E-01 | 3.19E-01 | 1147.41  | not significant |
| 7335 | SLC7A5P2     | 1.04 | 5.76E-01 | 6.59E-01 | 77.49    | not significant |
| 7336 | CNN3         | 1.04 | 1.38E-01 | 2.01E-01 | 2389.41  | not significant |
| 7337 | SCAP         | 1.04 | 1.20E-01 | 1.78E-01 | 4217.59  | not significant |
| 7338 | IGIP         | 1.04 | 5.91E-01 | 6.72E-01 | 80.11    | not significant |
| 7339 | NME4         | 1.04 | 2.19E-01 | 2.99E-01 | 1480.54  | not significant |
| 7340 | PDPK1        | 1.04 | 1.77E-01 | 2.49E-01 | 2110.94  | not significant |
| 7341 | MVP          | 1.04 | 4.71E-01 | 5.63E-01 | 285.00   | not significant |
| 7342 | CREB1        | 1.04 | 9.79E-02 | 1.50E-01 | 3286.18  | not significant |
| 7343 | PCNX         | 1.04 | 1.13E-01 | 1.69E-01 | 2486.87  | not significant |
| 7344 | MED22        | 1.04 | 5.59E-01 | 6.44E-01 | 109.61   | not significant |
| 7345 | TMTC4        | 1.04 | 2.68E-01 | 3.54E-01 | 1012.53  | not significant |
| 7346 | NT5C3A       | 1.04 | 2.44E-01 | 3.28E-01 | 1061.05  | not significant |
| 7347 | AKAP13       | 1.04 | 1.32E-01 | 1.95E-01 | 3169.81  | not significant |
| 7348 | ZNF793       | 1.04 | 5.00E-01 | 5.90E-01 | 14.71    | not significant |
| 7349 | ZKSCAN3      | 1.04 | 4.67E-01 | 5.58E-01 | 284.16   | not significant |
| 7350 | RPL27        | 1.04 | 3.49E-02 | 6.03E-02 | 15068.79 | not significant |
| 7351 | VGf          | 1.04 | 4.72E-01 | 5.63E-01 | 12.46    | not significant |
| 7352 | ZFP37        | 1.04 | 5.49E-01 | 6.35E-01 | 123.46   | not significant |
| 7353 | ALAD         | 1.04 | 2.10E-01 | 2.88E-01 | 1322.02  | not significant |
| 7354 | LANCL1       | 1.04 | 4.48E-02 | 7.54E-02 | 5127.72  | not significant |
| 7355 | WRB          | 1.04 | 2.49E-01 | 3.33E-01 | 1070.66  | not significant |
| 7356 | CASP7        | 1.04 | 1.60E-01 | 2.29E-01 | 1746.80  | not significant |
| 7357 | STMN1        | 1.04 | 5.94E-02 | 9.66E-02 | 62874.60 | not significant |
| 7358 | TMEM199      | 1.04 | 5.07E-01 | 5.97E-01 | 189.86   | not significant |
| 7359 | BICD1        | 1.04 | 3.33E-01 | 4.25E-01 | 618.60   | not significant |
| 7360 | HIVEP2       | 1.04 | 1.02E-01 | 1.55E-01 | 2693.91  | not significant |
| 7361 | GM2A         | 1.04 | 1.47E-01 | 2.12E-01 | 2184.07  | not significant |
| 7362 | OPRL1        | 1.04 | 5.18E-01 | 6.06E-01 | 21.91    | not significant |
| 7363 | CCDC134      | 1.04 | 4.51E-01 | 5.43E-01 | 311.88   | not significant |
| 7364 | NFIL3        | 1.04 | 5.72E-01 | 6.55E-01 | 45.82    | not significant |
| 7365 | RABGGTA      | 1.04 | 3.06E-01 | 3.95E-01 | 666.41   | not significant |
| 7366 | RAD54L2      | 1.04 | 2.64E-01 | 3.50E-01 | 1021.25  | not significant |
| 7367 | FBXW5        | 1.04 | 1.88E-01 | 2.62E-01 | 1604.77  | not significant |
| 7368 | LOC101928020 | 1.04 | 4.99E-01 | 5.89E-01 | 17.77    | not significant |
| 7369 | SIK2         | 1.04 | 1.93E-01 | 2.68E-01 | 1317.40  | not significant |
| 7370 | GDPD3        | 1.04 | 5.62E-01 | 6.46E-01 | 110.60   | not significant |
| 7371 | ARID3A       | 1.04 | 2.47E-01 | 3.31E-01 | 1009.68  | not significant |
| 7372 | WDR73        | 1.04 | 3.69E-01 | 4.60E-01 | 469.69   | not significant |
| 7373 | ZNF271       | 1.04 | 1.53E-01 | 2.20E-01 | 1631.79  | not significant |
| 7374 | YIPF2        | 1.04 | 3.15E-01 | 4.05E-01 | 662.93   | not significant |
| 7375 | BZRAP1       | 1.04 | 4.96E-01 | 5.86E-01 | 2140.00  | not significant |
| 7376 | NFAT5        | 1.04 | 4.84E-01 | 5.74E-01 | 1741.40  | not significant |
| 7377 | MYRF         | 1.04 | 5.65E-01 | 6.49E-01 | 40.31    | not significant |
| 7378 | GUCY2D       | 1.04 | 4.89E-01 | 5.79E-01 | 14.20    | not significant |
| 7379 | SHARPIN      | 1.04 | 2.49E-01 | 3.33E-01 | 1104.05  | not significant |
| 7380 | LOC729732    | 1.04 | 4.83E-01 | 5.74E-01 | 13.60    | not significant |

|      |              |      |          |          |          |                 |
|------|--------------|------|----------|----------|----------|-----------------|
| 7381 | ZNF550       | 1.05 | 2.48E-01 | 3.32E-01 | 916.86   | not significant |
| 7382 | FZD6         | 1.05 | 8.71E-02 | 1.35E-01 | 3041.96  | not significant |
| 7383 | NUDT21       | 1.05 | 3.55E-02 | 6.12E-02 | 13505.93 | not significant |
| 7384 | FAM127B      | 1.05 | 4.42E-01 | 5.34E-01 | 295.61   | not significant |
| 7385 | MTHFSD       | 1.05 | 3.34E-01 | 4.26E-01 | 567.94   | not significant |
| 7386 | ARMCX3       | 1.05 | 5.39E-01 | 6.26E-01 | 117.37   | not significant |
| 7387 | MLLT10       | 1.05 | 8.70E-02 | 1.35E-01 | 2734.13  | not significant |
| 7388 | TUBGCP3      | 1.05 | 1.02E-01 | 1.55E-01 | 2342.10  | not significant |
| 7389 | TENC1        | 1.05 | 5.08E-01 | 5.97E-01 | 17.94    | not significant |
| 7390 | XPNPEP2      | 1.05 | 1.56E-01 | 2.25E-01 | 1734.19  | not significant |
| 7391 | DYNLL2       | 1.05 | 1.29E-01 | 1.91E-01 | 6030.34  | not significant |
| 7392 | GALNT8       | 1.05 | 5.27E-01 | 6.15E-01 | 21.35    | not significant |
| 7393 | VPS26B       | 1.05 | 6.24E-02 | 1.01E-01 | 5362.11  | not significant |
| 7394 | GPKOW        | 1.05 | 4.30E-01 | 5.22E-01 | 318.22   | not significant |
| 7395 | RWDD1        | 1.05 | 1.41E-01 | 2.05E-01 | 2645.86  | not significant |
| 7396 | LOC646762    | 1.05 | 4.22E-01 | 5.13E-01 | 9.81     | not significant |
| 7397 | LOC728392    | 1.05 | 5.61E-01 | 6.46E-01 | 52.35    | not significant |
| 7398 | RABGAP1L     | 1.05 | 2.28E-01 | 3.09E-01 | 1033.62  | not significant |
| 7399 | TUBA1A       | 1.05 | 6.41E-02 | 1.03E-01 | 6443.99  | not significant |
| 7400 | STK31        | 1.05 | 4.32E-01 | 5.24E-01 | 10.17    | not significant |
| 7401 | PEMT         | 1.05 | 2.79E-01 | 3.67E-01 | 728.03   | not significant |
| 7402 | RIT1         | 1.05 | 2.25E-01 | 3.06E-01 | 957.66   | not significant |
| 7403 | SPG20        | 1.05 | 5.19E-01 | 6.07E-01 | 21.22    | not significant |
| 7404 | TPTE2P5      | 1.05 | 5.17E-01 | 6.06E-01 | 21.18    | not significant |
| 7405 | TMOD4        | 1.05 | 5.30E-01 | 6.18E-01 | 24.29    | not significant |
| 7406 | EGLN1        | 1.05 | 1.90E-01 | 2.65E-01 | 1334.85  | not significant |
| 7407 | FTO-IT1      | 1.05 | 4.39E-01 | 5.31E-01 | 11.52    | not significant |
| 7408 | FAM76B       | 1.05 | 1.84E-01 | 2.58E-01 | 1265.17  | not significant |
| 7409 | PDXP         | 1.05 | 1.58E-01 | 2.27E-01 | 2783.29  | not significant |
| 7410 | SCARNA17     | 1.05 | 5.17E-01 | 6.05E-01 | 22.22    | not significant |
| 7411 | HMGXB3       | 1.05 | 1.72E-01 | 2.43E-01 | 2157.98  | not significant |
| 7412 | SFSWAP       | 1.05 | 8.86E-02 | 1.37E-01 | 3040.56  | not significant |
| 7413 | CDKL5        | 1.05 | 4.89E-01 | 5.79E-01 | 17.52    | not significant |
| 7414 | PDE8A        | 1.05 | 3.69E-01 | 4.61E-01 | 464.30   | not significant |
| 7415 | TPP2         | 1.05 | 1.06E-01 | 1.61E-01 | 3893.25  | not significant |
| 7416 | ANKMY2       | 1.05 | 1.33E-01 | 1.95E-01 | 1737.79  | not significant |
| 7417 | STX10        | 1.05 | 1.11E-01 | 1.67E-01 | 2658.69  | not significant |
| 7418 | FLJ37035     | 1.05 | 5.06E-01 | 5.95E-01 | 21.72    | not significant |
| 7419 | PRR19        | 1.05 | 5.54E-01 | 6.39E-01 | 65.78    | not significant |
| 7420 | TNFRSF1A     | 1.05 | 1.25E-01 | 1.86E-01 | 1917.22  | not significant |
| 7421 | PHF6         | 1.05 | 6.01E-02 | 9.76E-02 | 4460.45  | not significant |
| 7422 | LOC100130357 | 1.05 | 5.21E-01 | 6.09E-01 | 24.02    | not significant |
| 7423 | SLC4A2       | 1.05 | 6.14E-02 | 9.94E-02 | 4095.82  | not significant |
| 7424 | SEC11A       | 1.05 | 1.18E-01 | 1.75E-01 | 2283.56  | not significant |
| 7425 | CDC7         | 1.05 | 7.83E-02 | 1.23E-01 | 3318.85  | not significant |
| 7426 | EDEM1        | 1.05 | 5.47E-02 | 9.01E-02 | 9765.60  | not significant |
| 7427 | GINS4        | 1.05 | 1.04E-01 | 1.58E-01 | 2541.89  | not significant |
| 7428 | ASB1         | 1.05 | 1.57E-01 | 2.25E-01 | 1461.71  | not significant |
| 7429 | PXMP2        | 1.05 | 1.44E-01 | 2.09E-01 | 1848.62  | not significant |
| 7430 | LINC01252    | 1.05 | 4.79E-01 | 5.70E-01 | 15.82    | not significant |
| 7431 | ZMIZ2        | 1.05 | 3.62E-01 | 4.54E-01 | 3044.91  | not significant |
| 7432 | LMNTD2       | 1.05 | 4.86E-01 | 5.76E-01 | 16.57    | not significant |
| 7433 | HEIH         | 1.05 | 2.46E-01 | 3.29E-01 | 850.78   | not significant |
| 7434 | ZNF141       | 1.05 | 4.71E-01 | 5.63E-01 | 14.62    | not significant |
| 7435 | UBE2L6       | 1.05 | 3.37E-02 | 5.85E-02 | 6153.91  | not significant |
| 7436 | NAV1         | 1.05 | 4.83E-01 | 5.73E-01 | 16.20    | not significant |
| 7437 | LOC146880    | 1.05 | 5.35E-01 | 6.22E-01 | 1053.49  | not significant |
| 7438 | DPEP2        | 1.05 | 5.43E-01 | 6.29E-01 | 36.38    | not significant |
| 7439 | PPP1R2       | 1.05 | 1.75E-01 | 2.47E-01 | 1381.33  | not significant |
| 7440 | LOC101927221 | 1.05 | 3.59E-01 | 4.51E-01 | 7.96     | not significant |
| 7441 | PKN3         | 1.05 | 3.74E-01 | 4.66E-01 | 446.08   | not significant |
| 7442 | ACO1         | 1.05 | 1.44E-01 | 2.09E-01 | 1459.03  | not significant |
| 7443 | MRPL30       | 1.05 | 1.32E-01 | 1.94E-01 | 2291.00  | not significant |
| 7444 | PDCL         | 1.05 | 2.18E-01 | 2.98E-01 | 1021.08  | not significant |
| 7445 | TIAM2        | 1.05 | 4.46E-01 | 5.38E-01 | 243.07   | not significant |
| 7446 | LYSMD2       | 1.05 | 3.03E-01 | 3.92E-01 | 676.49   | not significant |
| 7447 | GZF1         | 1.05 | 2.63E-01 | 3.49E-01 | 761.53   | not significant |
| 7448 | LRCH4        | 1.05 | 8.19E-02 | 1.28E-01 | 3641.80  | not significant |
| 7449 | DTD1         | 1.05 | 4.14E-01 | 5.05E-01 | 10.32    | not significant |
| 7450 | SUCO         | 1.05 | 1.01E-01 | 1.54E-01 | 1979.53  | not significant |
| 7451 | ZNF19        | 1.05 | 5.29E-01 | 6.17E-01 | 29.91    | not significant |
| 7452 | SRD5A3       | 1.05 | 3.63E-01 | 4.55E-01 | 413.56   | not significant |
| 7453 | LRIT3        | 1.05 | 4.46E-01 | 5.38E-01 | 13.14    | not significant |
| 7454 | KMT2E        | 1.05 | 3.01E-02 | 5.30E-02 | 5719.20  | not significant |
| 7455 | HIF1AN       | 1.05 | 2.99E-02 | 5.26E-02 | 4784.57  | not significant |
| 7456 | ETV2         | 1.05 | 4.82E-01 | 5.73E-01 | 17.76    | not significant |
| 7457 | SHPRH        | 1.05 | 1.18E-01 | 1.76E-01 | 2646.28  | not significant |
| 7458 | EXOC8        | 1.05 | 2.24E-01 | 3.05E-01 | 966.56   | not significant |
| 7459 | GRIPAP1      | 1.05 | 1.85E-01 | 2.60E-01 | 1118.01  | not significant |
| 7460 | TMEM9        | 1.05 | 2.29E-01 | 3.10E-01 | 835.05   | not significant |
| 7461 | CDK11B       | 1.05 | 2.56E-01 | 3.40E-01 | 815.78   | not significant |
| 7462 | PPP3CC       | 1.05 | 2.48E-01 | 3.32E-01 | 833.34   | not significant |
| 7463 | OBSCN        | 1.05 | 1.67E-01 | 2.37E-01 | 2035.60  | not significant |
| 7464 | NDFIP2       | 1.05 | 5.82E-02 | 9.49E-02 | 3326.77  | not significant |
| 7465 | UNC5CL       | 1.05 | 5.35E-01 | 6.22E-01 | 107.83   | not significant |
| 7466 | MYCBPAP      | 1.05 | 5.32E-01 | 6.20E-01 | 87.40    | not significant |
| 7467 | IP6K1        | 1.05 | 1.09E-01 | 1.64E-01 | 1782.43  | not significant |
| 7468 | ZNF45        | 1.05 | 2.05E-01 | 2.82E-01 | 1084.84  | not significant |

|      |               |      |          |          |          |                 |
|------|---------------|------|----------|----------|----------|-----------------|
| 7469 | SNRK          | 1.05 | 1.35E-01 | 1.97E-01 | 1458.67  | not significant |
| 7470 | DAPK3         | 1.05 | 2.27E-01 | 3.08E-01 | 997.87   | not significant |
| 7471 | AKR1A1        | 1.05 | 6.63E-02 | 1.06E-01 | 2744.41  | not significant |
| 7472 | VCP1P1        | 1.05 | 1.41E-01 | 2.06E-01 | 1817.32  | not significant |
| 7473 | SLC48A1       | 1.05 | 5.15E-01 | 6.04E-01 | 114.19   | not significant |
| 7474 | GUSBP3        | 1.05 | 5.37E-01 | 6.25E-01 | 68.53    | not significant |
| 7475 | C16orf46      | 1.05 | 5.35E-01 | 6.22E-01 | 73.42    | not significant |
| 7476 | CREBL2        | 1.05 | 2.41E-01 | 3.24E-01 | 838.96   | not significant |
| 7477 | TMEM218       | 1.05 | 2.74E-01 | 3.60E-01 | 629.52   | not significant |
| 7478 | LPPR2         | 1.05 | 4.38E-01 | 5.30E-01 | 12.64    | not significant |
| 7479 | ZNF845        | 1.05 | 3.12E-01 | 4.03E-01 | 527.07   | not significant |
| 7480 | SCN9A         | 1.05 | 5.21E-02 | 8.62E-02 | 3551.86  | not significant |
| 7481 | CA13          | 1.05 | 5.33E-01 | 6.21E-01 | 37.78    | not significant |
| 7482 | REPS1         | 1.05 | 7.09E-02 | 1.13E-01 | 2789.67  | not significant |
| 7483 | ZNF335        | 1.05 | 1.07E-01 | 1.61E-01 | 2295.52  | not significant |
| 7484 | SEPSECS       | 1.05 | 2.15E-01 | 2.95E-01 | 868.13   | not significant |
| 7485 | CLIP1         | 1.05 | 9.01E-02 | 1.39E-01 | 2438.17  | not significant |
| 7486 | LOC101928767  | 1.05 | 5.37E-01 | 6.24E-01 | 62.90    | not significant |
| 7487 | TSKS          | 1.05 | 4.51E-01 | 5.43E-01 | 224.67   | not significant |
| 7488 | FAM168A       | 1.05 | 4.43E-02 | 7.46E-02 | 4001.16  | not significant |
| 7489 | METAP1        | 1.05 | 4.40E-02 | 7.42E-02 | 4025.13  | not significant |
| 7490 | TRAM2         | 1.05 | 9.70E-02 | 1.49E-01 | 1984.53  | not significant |
| 7491 | PPFIA1        | 1.05 | 1.44E-01 | 2.09E-01 | 1517.24  | not significant |
| 7492 | SCYL1         | 1.05 | 8.47E-02 | 1.32E-01 | 2287.20  | not significant |
| 7493 | LOC101929767  | 1.05 | 5.28E-01 | 6.16E-01 | 83.71    | not significant |
| 7494 | KIAA1731      | 1.05 | 1.29E-01 | 1.91E-01 | 1846.72  | not significant |
| 7495 | FAM46C        | 1.05 | 4.36E-01 | 5.28E-01 | 14.15    | not significant |
| 7496 | ZNF449        | 1.05 | 4.52E-01 | 5.44E-01 | 14.63    | not significant |
| 7497 | NDUFS3        | 1.05 | 1.02E-01 | 1.56E-01 | 2555.10  | not significant |
| 7498 | HMGNA4        | 1.05 | 4.21E-02 | 7.13E-02 | 4748.51  | not significant |
| 7499 | CMIP          | 1.05 | 3.17E-02 | 5.55E-02 | 4223.03  | not significant |
| 7500 | ATP6V1F       | 1.05 | 8.56E-02 | 1.33E-01 | 2841.82  | not significant |
| 7501 | LIX1L         | 1.05 | 3.91E-01 | 4.83E-01 | 354.35   | not significant |
| 7502 | PEX3          | 1.05 | 2.97E-01 | 3.86E-01 | 560.08   | not significant |
| 7503 | RIMKLA        | 1.05 | 5.00E-01 | 5.90E-01 | 26.51    | not significant |
| 7504 | LINC00969     | 1.05 | 5.28E-01 | 6.16E-01 | 41.31    | not significant |
| 7505 | BBC3          | 1.05 | 5.28E-01 | 6.16E-01 | 77.13    | not significant |
| 7506 | PGRMC2        | 1.05 | 7.70E-02 | 1.21E-01 | 2713.61  | not significant |
| 7507 | BCAP29        | 1.05 | 8.85E-02 | 1.37E-01 | 2184.10  | not significant |
| 7508 | SLC2A4RG      | 1.05 | 2.52E-01 | 3.37E-01 | 741.62   | not significant |
| 7509 | MAZ           | 1.05 | 4.03E-02 | 6.85E-02 | 21468.32 | not significant |
| 7510 | TBC1D3P1-DHX4 | 1.05 | 5.20E-01 | 6.08E-01 | 35.11    | not significant |
| 7511 | LOC389705     | 1.05 | 4.87E-01 | 5.77E-01 | 21.39    | not significant |
| 7512 | TAF7          | 1.05 | 5.02E-02 | 8.34E-02 | 7259.17  | not significant |
| 7513 | TOB2          | 1.05 | 1.78E-01 | 2.51E-01 | 1153.07  | not significant |
| 7514 | FLT1          | 1.05 | 1.62E-01 | 2.31E-01 | 1174.21  | not significant |
| 7515 | METTL21B      | 1.05 | 3.25E-01 | 4.16E-01 | 515.29   | not significant |
| 7516 | BAHD1         | 1.05 | 1.73E-01 | 2.45E-01 | 1554.86  | not significant |
| 7517 | TBC1D14       | 1.05 | 3.85E-02 | 6.59E-02 | 4204.55  | not significant |
| 7518 | TMEM167B      | 1.05 | 9.38E-02 | 1.44E-01 | 1966.20  | not significant |
| 7519 | SEMA3G        | 1.05 | 4.59E-01 | 5.50E-01 | 16.92    | not significant |
| 7520 | NOXRRED1      | 1.05 | 3.91E-01 | 4.83E-01 | 10.37    | not significant |
| 7521 | PLXNB3        | 1.05 | 4.59E-01 | 5.50E-01 | 15.93    | not significant |
| 7522 | LIMD1         | 1.05 | 3.37E-02 | 5.85E-02 | 3844.81  | not significant |
| 7523 | LOC101928069  | 1.05 | 5.13E-01 | 6.01E-01 | 32.48    | not significant |
| 7524 | CXorf56       | 1.05 | 2.21E-01 | 3.01E-01 | 904.69   | not significant |
| 7525 | METTL21A      | 1.05 | 2.24E-01 | 3.05E-01 | 895.44   | not significant |
| 7526 | SS18          | 1.05 | 8.46E-02 | 1.32E-01 | 3176.11  | not significant |
| 7527 | CA8           | 1.05 | 4.53E-01 | 5.45E-01 | 182.52   | not significant |
| 7528 | YTHDF3-AS1    | 1.05 | 4.90E-01 | 5.80E-01 | 22.67    | not significant |
| 7529 | MX2           | 1.05 | 5.10E-01 | 5.98E-01 | 91.04    | not significant |
| 7530 | TIAL1         | 1.05 | 2.87E-02 | 5.08E-02 | 5748.73  | not significant |
| 7531 | FAM66D        | 1.05 | 4.50E-01 | 5.42E-01 | 15.98    | not significant |
| 7532 | TPR           | 1.05 | 8.18E-02 | 1.28E-01 | 12375.73 | not significant |
| 7533 | ZSCAN32       | 1.05 | 1.88E-01 | 2.62E-01 | 997.90   | not significant |
| 7534 | GEMIN8        | 1.05 | 2.97E-01 | 3.86E-01 | 520.91   | not significant |
| 7535 | PVT1          | 1.05 | 4.22E-01 | 5.14E-01 | 235.91   | not significant |
| 7536 | ANKAR         | 1.05 | 5.23E-01 | 6.11E-01 | 50.61    | not significant |
| 7537 | WDR45B        | 1.05 | 6.57E-02 | 1.06E-01 | 2284.17  | not significant |
| 7538 | NCAPD2        | 1.05 | 1.17E-02 | 2.26E-02 | 19264.77 | not significant |
| 7539 | MIR181A1HG    | 1.05 | 4.95E-01 | 5.85E-01 | 26.41    | not significant |
| 7540 | RNASEH2A      | 1.05 | 1.23E-01 | 1.83E-01 | 2491.22  | not significant |
| 7541 | C10orf88      | 1.05 | 3.14E-01 | 4.04E-01 | 527.99   | not significant |
| 7542 | PGBD4         | 1.05 | 4.74E-01 | 5.65E-01 | 152.46   | not significant |
| 7543 | NDE1          | 1.05 | 9.60E-02 | 1.47E-01 | 1968.49  | not significant |
| 7544 | CLDN15        | 1.05 | 2.28E-01 | 3.09E-01 | 775.05   | not significant |
| 7545 | MAML1         | 1.05 | 4.59E-02 | 7.71E-02 | 3688.12  | not significant |
| 7546 | STON1         | 1.05 | 5.17E-01 | 6.05E-01 | 53.85    | not significant |
| 7547 | LINC01436     | 1.05 | 4.97E-01 | 5.87E-01 | 109.82   | not significant |
| 7548 | IVD           | 1.05 | 1.10E-01 | 1.66E-01 | 2102.89  | not significant |
| 7549 | IRF9          | 1.05 | 3.90E-01 | 4.83E-01 | 284.58   | not significant |
| 7550 | CDK4          | 1.05 | 2.58E-02 | 4.61E-02 | 7509.78  | not significant |
| 7551 | BCRP3         | 1.05 | 3.55E-01 | 4.46E-01 | 8.51     | not significant |
| 7552 | C19orf68      | 1.05 | 3.36E-01 | 4.27E-01 | 504.78   | not significant |
| 7553 | PCSK7         | 1.05 | 9.39E-02 | 1.44E-01 | 1683.56  | not significant |
| 7554 | NUBP2         | 1.05 | 7.21E-02 | 1.14E-01 | 2434.77  | not significant |
| 7555 | ZNF292        | 1.05 | 9.34E-02 | 1.44E-01 | 3085.36  | not significant |
| 7556 | LINC01125     | 1.05 | 4.14E-01 | 5.06E-01 | 12.49    | not significant |

|      |              |      |          |          |          |                 |
|------|--------------|------|----------|----------|----------|-----------------|
| 7557 | NANOS3       | 1.05 | 4.30E-01 | 5.22E-01 | 14.12    | not significant |
| 7558 | TRPC3        | 1.05 | 5.10E-01 | 5.99E-01 | 38.02    | not significant |
| 7559 | LINC00910    | 1.05 | 5.07E-01 | 5.97E-01 | 38.68    | not significant |
| 7560 | FAM219A      | 1.05 | 2.58E-01 | 3.43E-01 | 648.73   | not significant |
| 7561 | LOC100133331 | 1.05 | 5.16E-01 | 6.04E-01 | 50.17    | not significant |
| 7562 | ARL8A        | 1.05 | 1.53E-01 | 2.21E-01 | 1152.77  | not significant |
| 7563 | MAVS         | 1.05 | 3.44E-02 | 5.97E-02 | 6349.67  | not significant |
| 7564 | S100A13      | 1.05 | 5.13E-01 | 6.02E-01 | 64.32    | not significant |
| 7565 | LOC101927550 | 1.05 | 5.09E-01 | 5.98E-01 | 71.61    | not significant |
| 7566 | PTPN2        | 1.05 | 4.55E-02 | 7.65E-02 | 2910.68  | not significant |
| 7567 | STX6         | 1.05 | 8.51E-02 | 1.33E-01 | 2763.90  | not significant |
| 7568 | TM9SF1       | 1.05 | 1.45E-01 | 2.10E-01 | 1253.15  | not significant |
| 7569 | CEP104       | 1.05 | 6.78E-02 | 1.08E-01 | 2203.87  | not significant |
| 7570 | ZNF337       | 1.05 | 1.94E-01 | 2.70E-01 | 975.54   | not significant |
| 7571 | AQPEP        | 1.05 | 4.24E-01 | 5.16E-01 | 13.74    | not significant |
| 7572 | TTF2         | 1.05 | 4.31E-02 | 7.28E-02 | 4698.53  | not significant |
| 7573 | TGFB3        | 1.05 | 5.08E-01 | 5.97E-01 | 41.74    | not significant |
| 7574 | PLEKHO1      | 1.05 | 1.88E-01 | 2.63E-01 | 960.54   | not significant |
| 7575 | SNRNP200     | 1.05 | 7.74E-02 | 1.22E-01 | 20620.46 | not significant |
| 7576 | MEX3C        | 1.05 | 6.63E-02 | 1.06E-01 | 3134.30  | not significant |
| 7577 | ZNF573       | 1.05 | 4.95E-01 | 5.85E-01 | 91.57    | not significant |
| 7578 | GUCY1B3      | 1.05 | 1.13E-01 | 1.69E-01 | 1438.79  | not significant |
| 7579 | RPL36        | 1.05 | 2.84E-01 | 3.72E-01 | 15672.15 | not significant |
| 7580 | TMEM243      | 1.05 | 1.76E-01 | 2.48E-01 | 929.33   | not significant |
| 7581 | RFX8         | 1.05 | 4.92E-01 | 5.82E-01 | 148.00   | not significant |
| 7582 | PEX19        | 1.05 | 7.45E-02 | 1.18E-01 | 2050.78  | not significant |
| 7583 | S1PR2        | 1.05 | 5.08E-01 | 5.97E-01 | 64.18    | not significant |
| 7584 | C3orf33      | 1.05 | 4.75E-01 | 5.66E-01 | 122.63   | not significant |
| 7585 | HEXB         | 1.05 | 9.14E-02 | 1.41E-01 | 2005.03  | not significant |
| 7586 | NABP1        | 1.05 | 3.00E-01 | 3.89E-01 | 472.08   | not significant |
| 7587 | PHC3         | 1.05 | 3.86E-01 | 4.78E-01 | 2293.02  | not significant |
| 7588 | DNM1P46      | 1.05 | 4.87E-01 | 5.77E-01 | 26.94    | not significant |
| 7589 | COG1         | 1.05 | 1.48E-01 | 2.14E-01 | 1326.50  | not significant |
| 7590 | RFC1         | 1.05 | 1.53E-02 | 2.88E-02 | 8068.57  | not significant |
| 7591 | MOB1B        | 1.05 | 2.70E-02 | 4.80E-02 | 5432.66  | not significant |
| 7592 | COPS3        | 1.05 | 2.52E-02 | 4.52E-02 | 5589.45  | not significant |
| 7593 | TRIM26       | 1.05 | 3.28E-01 | 4.19E-01 | 417.51   | not significant |
| 7594 | BTN3A3       | 1.05 | 1.60E-01 | 2.29E-01 | 1015.88  | not significant |
| 7595 | E2F6         | 1.05 | 1.46E-01 | 2.11E-01 | 1058.12  | not significant |
| 7596 | ASF1B        | 1.05 | 3.05E-02 | 5.36E-02 | 6159.90  | not significant |
| 7597 | PRKCA        | 1.05 | 1.73E-02 | 3.22E-02 | 7984.71  | not significant |
| 7598 | PARP15       | 1.05 | 4.59E-01 | 5.51E-01 | 149.61   | not significant |
| 7599 | ZYG11B       | 1.05 | 2.44E-01 | 3.27E-01 | 747.13   | not significant |
| 7600 | PLCD1        | 1.05 | 5.04E-01 | 5.94E-01 | 59.92    | not significant |
| 7601 | R3HCC1       | 1.05 | 9.13E-02 | 1.41E-01 | 1704.56  | not significant |
| 7602 | LEAP2        | 1.05 | 4.76E-01 | 5.67E-01 | 25.93    | not significant |
| 7603 | STX12        | 1.05 | 2.29E-01 | 3.10E-01 | 661.86   | not significant |
| 7604 | LTBP3        | 1.05 | 4.95E-01 | 5.85E-01 | 93.15    | not significant |
| 7605 | PANX1        | 1.05 | 1.00E-01 | 1.53E-01 | 1442.17  | not significant |
| 7606 | EXO1         | 1.05 | 3.96E-02 | 6.75E-02 | 3841.93  | not significant |
| 7607 | FAM204A      | 1.05 | 1.17E-01 | 1.74E-01 | 1283.35  | not significant |
| 7608 | DTX4         | 1.05 | 3.64E-01 | 4.56E-01 | 10.44    | not significant |
| 7609 | ZNF513       | 1.05 | 3.85E-01 | 4.77E-01 | 254.12   | not significant |
| 7610 | RSBN1        | 1.05 | 8.56E-02 | 1.33E-01 | 1854.09  | not significant |
| 7611 | WDR26        | 1.05 | 3.25E-02 | 5.67E-02 | 5498.72  | not significant |
| 7612 | HS3ST3B1     | 1.05 | 3.62E-01 | 4.55E-01 | 10.53    | not significant |
| 7613 | RCAN3        | 1.05 | 1.69E-01 | 2.41E-01 | 1075.23  | not significant |
| 7614 | E2F3         | 1.05 | 2.85E-02 | 5.04E-02 | 3598.67  | not significant |
| 7615 | SPECC1L      | 1.05 | 1.27E-01 | 1.88E-01 | 1261.24  | not significant |
| 7616 | NPB          | 1.05 | 3.91E-01 | 4.84E-01 | 14.25    | not significant |
| 7617 | TCAIM        | 1.05 | 1.24E-01 | 1.84E-01 | 1264.40  | not significant |
| 7618 | CLK2P        | 1.05 | 4.11E-01 | 5.03E-01 | 14.27    | not significant |
| 7619 | LOC103344931 | 1.05 | 3.34E-01 | 4.26E-01 | 343.43   | not significant |
| 7620 | SAMD15       | 1.05 | 3.35E-01 | 4.26E-01 | 9.85     | not significant |
| 7621 | ALG9         | 1.05 | 2.52E-01 | 3.36E-01 | 555.88   | not significant |
| 7622 | CCDC30       | 1.05 | 3.88E-01 | 4.80E-01 | 12.22    | not significant |
| 7623 | ZC3H6        | 1.05 | 2.69E-01 | 3.55E-01 | 569.30   | not significant |
| 7624 | PBX3         | 1.05 | 1.75E-01 | 2.47E-01 | 845.69   | not significant |
| 7625 | UPF3A        | 1.05 | 1.75E-01 | 2.48E-01 | 886.87   | not significant |
| 7626 | INVS         | 1.05 | 2.57E-01 | 3.42E-01 | 546.68   | not significant |
| 7627 | EHMT1        | 1.05 | 4.82E-02 | 8.04E-02 | 2648.43  | not significant |
| 7628 | DLEU7-AS1    | 1.05 | 3.22E-01 | 4.13E-01 | 9.26     | not significant |
| 7629 | ZNF25        | 1.05 | 3.83E-01 | 4.75E-01 | 245.65   | not significant |
| 7630 | CRELD1       | 1.05 | 3.95E-01 | 4.87E-01 | 236.32   | not significant |
| 7631 | F8           | 1.05 | 4.79E-01 | 5.70E-01 | 33.86    | not significant |
| 7632 | CCDC106      | 1.05 | 3.43E-01 | 4.34E-01 | 344.53   | not significant |
| 7633 | FTX          | 1.05 | 4.57E-01 | 5.49E-01 | 24.88    | not significant |
| 7634 | MAPK8        | 1.05 | 1.99E-02 | 3.64E-02 | 4224.63  | not significant |
| 7635 | TBCA         | 1.06 | 4.48E-02 | 7.54E-02 | 4131.44  | not significant |
| 7636 | INTS6-AS1    | 1.06 | 4.78E-01 | 5.69E-01 | 31.25    | not significant |
| 7637 | TMPRSS5      | 1.06 | 3.65E-01 | 4.57E-01 | 11.13    | not significant |
| 7638 | DGCR2        | 1.06 | 6.43E-02 | 1.04E-01 | 2508.76  | not significant |
| 7639 | ZNF429       | 1.06 | 3.23E-01 | 4.14E-01 | 383.56   | not significant |
| 7640 | EPS15        | 1.06 | 3.10E-02 | 5.43E-02 | 3275.87  | not significant |
| 7641 | DPF1         | 1.06 | 4.60E-01 | 5.51E-01 | 129.33   | not significant |
| 7642 | BRCA1        | 1.06 | 1.47E-02 | 2.78E-02 | 5261.44  | not significant |
| 7643 | PNPLA6       | 1.06 | 7.59E-02 | 1.20E-01 | 2307.18  | not significant |
| 7644 | LRRRC37A     | 1.06 | 4.06E-01 | 4.97E-01 | 15.98    | not significant |

|      |              |      |          |          |          |                 |
|------|--------------|------|----------|----------|----------|-----------------|
| 7645 | NOL9         | 1.06 | 1.73E-01 | 2.45E-01 | 1037.18  | not significant |
| 7646 | SPAG1        | 1.06 | 2.50E-01 | 3.34E-01 | 531.72   | not significant |
| 7647 | COX15        | 1.06 | 5.84E-02 | 9.52E-02 | 2028.77  | not significant |
| 7648 | BZRAP1-AS1   | 1.06 | 1.88E-01 | 2.63E-01 | 805.16   | not significant |
| 7649 | SIK3         | 1.06 | 1.78E-01 | 2.50E-01 | 1128.12  | not significant |
| 7650 | RASA3        | 1.06 | 4.22E-02 | 7.14E-02 | 3599.63  | not significant |
| 7651 | KLHL5        | 1.06 | 1.33E-01 | 1.95E-01 | 1104.49  | not significant |
| 7652 | LOC100130691 | 1.06 | 4.83E-01 | 5.73E-01 | 37.85    | not significant |
| 7653 | SAP30        | 1.06 | 2.05E-01 | 2.83E-01 | 850.94   | not significant |
| 7654 | DSCR3        | 1.06 | 3.08E-02 | 5.40E-02 | 3437.50  | not significant |
| 7655 | NMI          | 1.06 | 4.01E-02 | 6.82E-02 | 2800.27  | not significant |
| 7656 | SAP30L-AS1   | 1.06 | 3.29E-01 | 4.20E-01 | 9.08     | not significant |
| 7657 | GLG1         | 1.06 | 3.85E-02 | 6.59E-02 | 3107.03  | not significant |
| 7658 | ZNF347       | 1.06 | 1.28E-01 | 1.89E-01 | 1138.33  | not significant |
| 7659 | SSR1         | 1.06 | 8.51E-03 | 1.69E-02 | 8941.48  | not significant |
| 7660 | POLA2        | 1.06 | 2.60E-02 | 4.64E-02 | 3214.82  | not significant |
| 7661 | TCTE3        | 1.06 | 3.32E-01 | 4.24E-01 | 9.63     | not significant |
| 7662 | SMAD2        | 1.06 | 1.95E-02 | 3.59E-02 | 4336.76  | not significant |
| 7663 | CFAP36       | 1.06 | 2.29E-01 | 3.11E-01 | 607.41   | not significant |
| 7664 | GOPC         | 1.06 | 3.06E-02 | 5.38E-02 | 2842.18  | not significant |
| 7665 | SLC43A3      | 1.06 | 8.94E-03 | 1.77E-02 | 7944.62  | not significant |
| 7666 | ESYT2        | 1.06 | 4.80E-03 | 1.01E-02 | 13049.21 | not significant |
| 7667 | TTC3         | 1.06 | 7.22E-03 | 1.46E-02 | 8160.05  | not significant |
| 7668 | DUS1L        | 1.06 | 1.37E-02 | 2.61E-02 | 5021.77  | not significant |
| 7669 | SRBD1        | 1.06 | 6.84E-02 | 1.09E-01 | 1987.86  | not significant |
| 7670 | TM2D1        | 1.06 | 2.34E-01 | 3.15E-01 | 592.90   | not significant |
| 7671 | KIF26B       | 1.06 | 3.43E-01 | 4.34E-01 | 10.27    | not significant |
| 7672 | AGPAT6       | 1.06 | 3.16E-02 | 5.53E-02 | 3331.79  | not significant |
| 7673 | PJA2         | 1.06 | 1.37E-02 | 2.62E-02 | 5134.40  | not significant |
| 7674 | RAB11A       | 1.06 | 5.94E-02 | 9.67E-02 | 3824.38  | not significant |
| 7675 | SKIDA1       | 1.06 | 4.45E-01 | 5.37E-01 | 24.07    | not significant |
| 7676 | CISD2        | 1.06 | 1.35E-01 | 1.98E-01 | 980.39   | not significant |
| 7677 | CACNA2D4     | 1.06 | 4.77E-01 | 5.68E-01 | 42.90    | not significant |
| 7678 | ZNF225       | 1.06 | 3.74E-01 | 4.66E-01 | 256.11   | not significant |
| 7679 | CNOT4        | 1.06 | 1.44E-01 | 2.10E-01 | 944.08   | not significant |
| 7680 | YTHDC2       | 1.06 | 8.73E-02 | 1.36E-01 | 2552.50  | not significant |
| 7681 | STOML1       | 1.06 | 3.61E-01 | 4.53E-01 | 273.74   | not significant |
| 7682 | PRRC1        | 1.06 | 3.00E-02 | 5.28E-02 | 3273.03  | not significant |
| 7683 | CTU1         | 1.06 | 3.20E-01 | 4.11E-01 | 346.22   | not significant |
| 7684 | TRIM36       | 1.06 | 3.82E-01 | 4.74E-01 | 235.96   | not significant |
| 7685 | FBXO44       | 1.06 | 1.02E-01 | 1.55E-01 | 1420.83  | not significant |
| 7686 | BLZF1        | 1.06 | 2.45E-01 | 3.29E-01 | 581.38   | not significant |
| 7687 | NUP62CL      | 1.06 | 4.60E-01 | 5.52E-01 | 30.91    | not significant |
| 7688 | THOP1        | 1.06 | 3.89E-02 | 6.65E-02 | 3065.14  | not significant |
| 7689 | CDC25C       | 1.06 | 2.78E-01 | 3.65E-01 | 526.12   | not significant |
| 7690 | LOC728554    | 1.06 | 3.43E-01 | 4.34E-01 | 296.19   | not significant |
| 7691 | ZC3H8        | 1.06 | 1.02E-01 | 1.56E-01 | 1505.40  | not significant |
| 7692 | LOC100133985 | 1.06 | 3.56E-01 | 4.48E-01 | 14.72    | not significant |
| 7693 | CD3G         | 1.06 | 1.34E-02 | 2.57E-02 | 6196.01  | not significant |
| 7694 | SLC31A2      | 1.06 | 4.15E-01 | 5.06E-01 | 183.77   | not significant |
| 7695 | RHOT2        | 1.06 | 7.91E-02 | 1.24E-01 | 2635.71  | not significant |
| 7696 | CPTP         | 1.06 | 3.09E-01 | 4.00E-01 | 389.39   | not significant |
| 7697 | SCML2        | 1.06 | 4.86E-02 | 8.10E-02 | 2102.08  | not significant |
| 7698 | MFF          | 1.06 | 3.47E-02 | 6.00E-02 | 2567.64  | not significant |
| 7699 | CYP4F22      | 1.06 | 3.32E-01 | 4.23E-01 | 10.61    | not significant |
| 7700 | HHLA3        | 1.06 | 4.07E-01 | 4.99E-01 | 172.92   | not significant |
| 7701 | ANKRD13B     | 1.06 | 2.14E-01 | 2.93E-01 | 725.47   | not significant |
| 7702 | HECTD2       | 1.06 | 4.74E-01 | 5.65E-01 | 68.44    | not significant |
| 7703 | FLJ37201     | 1.06 | 3.79E-01 | 4.70E-01 | 13.57    | not significant |
| 7704 | JADE3        | 1.06 | 4.20E-01 | 5.12E-01 | 158.75   | not significant |
| 7705 | C11orf80     | 1.06 | 2.14E-01 | 2.93E-01 | 602.76   | not significant |
| 7706 | MRPS25       | 1.06 | 3.90E-02 | 6.66E-02 | 2539.94  | not significant |
| 7707 | BET1         | 1.06 | 1.69E-01 | 2.40E-01 | 849.70   | not significant |
| 7708 | CBLL1        | 1.06 | 2.87E-02 | 5.07E-02 | 2758.66  | not significant |
| 7709 | ZNF165       | 1.06 | 3.62E-01 | 4.54E-01 | 12.20    | not significant |
| 7710 | BTF3         | 1.06 | 4.05E-02 | 6.88E-02 | 20247.97 | not significant |
| 7711 | MAP3K10      | 1.06 | 2.50E-01 | 3.34E-01 | 606.01   | not significant |
| 7712 | EXOC3        | 1.06 | 7.03E-02 | 1.12E-01 | 1822.06  | not significant |
| 7713 | ICAM1        | 1.06 | 3.99E-01 | 4.91E-01 | 192.76   | not significant |
| 7714 | PHF20        | 1.06 | 1.50E-02 | 2.82E-02 | 3800.09  | not significant |
| 7715 | TIGD3        | 1.06 | 4.74E-01 | 5.65E-01 | 50.22    | not significant |
| 7716 | ZNF383       | 1.06 | 3.69E-01 | 4.61E-01 | 238.58   | not significant |
| 7717 | HMHA1        | 1.06 | 7.09E-03 | 1.44E-02 | 9281.35  | not significant |
| 7718 | FAM122A      | 1.06 | 2.11E-01 | 2.90E-01 | 598.12   | not significant |
| 7719 | EIF3K        | 1.06 | 2.89E-02 | 5.11E-02 | 5084.35  | not significant |
| 7720 | TRPC1        | 1.06 | 4.13E-01 | 5.05E-01 | 18.81    | not significant |
| 7721 | PTPLAD1      | 1.06 | 8.22E-03 | 1.64E-02 | 6899.84  | not significant |
| 7722 | SLC25A15     | 1.06 | 6.19E-02 | 1.00E-01 | 2128.65  | not significant |
| 7723 | ZMAT2        | 1.06 | 4.45E-02 | 7.49E-02 | 3483.55  | not significant |
| 7724 | HPRT1        | 1.06 | 2.04E-02 | 3.73E-02 | 3878.73  | not significant |
| 7725 | CHSY1        | 1.06 | 3.50E-02 | 6.04E-02 | 2992.58  | not significant |
| 7726 | MAP3K6       | 1.06 | 3.63E-01 | 4.55E-01 | 12.84    | not significant |
| 7727 | MCF2L        | 1.06 | 3.97E-01 | 4.89E-01 | 16.89    | not significant |
| 7728 | CCDC62       | 1.06 | 4.64E-01 | 5.56E-01 | 37.30    | not significant |
| 7729 | CDK5RAP2     | 1.06 | 4.28E-02 | 7.23E-02 | 3189.57  | not significant |
| 7730 | ZFYVE20      | 1.06 | 1.93E-01 | 2.69E-01 | 659.07   | not significant |
| 7731 | C22orf46     | 1.06 | 1.33E-01 | 1.95E-01 | 1055.77  | not significant |
| 7732 | OTUD3        | 1.06 | 1.53E-01 | 2.20E-01 | 1045.86  | not significant |



|      |            |      |          |          |          |                 |
|------|------------|------|----------|----------|----------|-----------------|
| 7733 | RNF208     | 1.06 | 3.78E-01 | 4.70E-01 | 14.31    | not significant |
| 7734 | LKAAEAR1   | 1.06 | 3.17E-01 | 4.07E-01 | 10.83    | not significant |
| 7735 | FNBP1      | 1.06 | 5.07E-03 | 1.06E-02 | 9086.53  | not significant |
| 7736 | TBC1D10B   | 1.06 | 3.76E-02 | 6.45E-02 | 3357.83  | not significant |
| 7737 | SPATA5     | 1.06 | 1.18E-01 | 1.76E-01 | 1055.60  | not significant |
| 7738 | DTL        | 1.06 | 3.53E-03 | 7.63E-03 | 7204.49  | not significant |
| 7739 | WDR35      | 1.06 | 4.01E-01 | 4.93E-01 | 173.95   | not significant |
| 7740 | PIP5KL1    | 1.06 | 3.64E-01 | 4.56E-01 | 13.49    | not significant |
| 7741 | ASPHD2     | 1.06 | 3.74E-01 | 4.66E-01 | 204.52   | not significant |
| 7742 | PTHLH      | 1.06 | 3.53E-01 | 4.45E-01 | 12.38    | not significant |
| 7743 | C15orf61   | 1.06 | 3.45E-01 | 4.36E-01 | 290.17   | not significant |
| 7744 | RHBDD2     | 1.06 | 3.22E-01 | 4.13E-01 | 331.94   | not significant |
| 7745 | ZNF440     | 1.06 | 3.29E-01 | 4.20E-01 | 280.83   | not significant |
| 7746 | ARID4A     | 1.06 | 7.15E-02 | 1.14E-01 | 1623.28  | not significant |
| 7747 | C17orf96   | 1.06 | 3.07E-01 | 3.97E-01 | 341.74   | not significant |
| 7748 | PPME1      | 1.06 | 6.68E-02 | 1.07E-01 | 1678.78  | not significant |
| 7749 | MCC        | 1.06 | 3.28E-01 | 4.19E-01 | 285.57   | not significant |
| 7750 | NEK4       | 1.06 | 9.62E-02 | 1.47E-01 | 1310.17  | not significant |
| 7751 | LRP2BP     | 1.06 | 4.48E-01 | 5.40E-01 | 31.63    | not significant |
| 7752 | ZNF702P    | 1.06 | 3.53E-01 | 4.45E-01 | 259.08   | not significant |
| 7753 | MTL5       | 1.06 | 4.55E-01 | 5.46E-01 | 82.36    | not significant |
| 7754 | FAM179A    | 1.06 | 3.65E-01 | 4.57E-01 | 205.03   | not significant |
| 7755 | CCNDBP1    | 1.06 | 1.12E-01 | 1.68E-01 | 1080.70  | not significant |
| 7756 | ABI2       | 1.06 | 5.46E-03 | 1.13E-02 | 7745.84  | not significant |
| 7757 | COPA       | 1.06 | 4.42E-03 | 9.38E-03 | 7489.00  | not significant |
| 7758 | LOC407835  | 1.06 | 4.53E-01 | 5.45E-01 | 36.05    | not significant |
| 7759 | TBC1D2     | 1.06 | 4.36E-01 | 5.29E-01 | 27.25    | not significant |
| 7760 | SYVN1      | 1.06 | 6.64E-02 | 1.07E-01 | 1726.92  | not significant |
| 7761 | RIF1       | 1.06 | 3.42E-02 | 5.94E-02 | 6405.99  | not significant |
| 7762 | TRMT11     | 1.06 | 1.85E-01 | 2.59E-01 | 760.73   | not significant |
| 7763 | TRAPPC10   | 1.06 | 5.41E-02 | 8.92E-02 | 2255.29  | not significant |
| 7764 | ZNF692     | 1.06 | 2.34E-01 | 3.15E-01 | 754.23   | not significant |
| 7765 | REPIN1     | 1.06 | 1.76E-02 | 3.27E-02 | 4970.27  | not significant |
| 7766 | ATP7A      | 1.06 | 4.11E-01 | 5.03E-01 | 138.15   | not significant |
| 7767 | TMEM30A    | 1.06 | 9.35E-03 | 1.85E-02 | 5020.66  | not significant |
| 7768 | INPP5F     | 1.06 | 1.70E-01 | 2.41E-01 | 694.94   | not significant |
| 7769 | MED20      | 1.06 | 6.35E-02 | 1.02E-01 | 1662.13  | not significant |
| 7770 | KIAA1715   | 1.06 | 4.74E-02 | 7.92E-02 | 2176.42  | not significant |
| 7771 | RASGRP1    | 1.06 | 1.42E-02 | 2.69E-02 | 4145.81  | not significant |
| 7772 | MTMR12     | 1.06 | 4.92E-02 | 8.19E-02 | 1932.32  | not significant |
| 7773 | FXR2       | 1.06 | 4.10E-02 | 6.95E-02 | 1971.44  | not significant |
| 7774 | LINC00884  | 1.06 | 4.32E-01 | 5.24E-01 | 26.40    | not significant |
| 7775 | CCDC43     | 1.06 | 8.48E-02 | 1.32E-01 | 1363.78  | not significant |
| 7776 | PLEKHA2    | 1.06 | 1.28E-02 | 2.45E-02 | 7585.50  | not significant |
| 7777 | MID1       | 1.06 | 4.20E-01 | 5.12E-01 | 22.70    | not significant |
| 7778 | SEMA6A-AS1 | 1.06 | 3.89E-01 | 4.81E-01 | 17.04    | not significant |
| 7779 | SLC25A4    | 1.06 | 3.94E-01 | 4.86E-01 | 162.42   | not significant |
| 7780 | FBXL8      | 1.06 | 4.52E-01 | 5.44E-01 | 93.97    | not significant |
| 7781 | ALS2       | 1.06 | 1.06E-01 | 1.61E-01 | 1081.72  | not significant |
| 7782 | KDM2A      | 1.06 | 1.68E-02 | 3.14E-02 | 4845.68  | not significant |
| 7783 | ZCCHC8     | 1.06 | 5.61E-02 | 9.19E-02 | 1926.32  | not significant |
| 7784 | CLCN3      | 1.06 | 9.50E-03 | 1.87E-02 | 4924.47  | not significant |
| 7785 | KLHDC8B    | 1.06 | 3.28E-01 | 4.19E-01 | 11.98    | not significant |
| 7786 | D2HGDH     | 1.06 | 2.06E-01 | 2.83E-01 | 691.47   | not significant |
| 7787 | LZTFL1     | 1.06 | 2.45E-01 | 3.28E-01 | 3341.09  | not significant |
| 7788 | ARFGAP1    | 1.06 | 2.87E-02 | 5.08E-02 | 3533.41  | not significant |
| 7789 | STK25      | 1.06 | 1.79E-02 | 3.32E-02 | 3144.73  | not significant |
| 7790 | KIFAP3     | 1.06 | 9.40E-02 | 1.45E-01 | 1142.47  | not significant |
| 7791 | ZFPL1      | 1.06 | 1.95E-01 | 2.71E-01 | 608.17   | not significant |
| 7792 | PAXIP1-AS1 | 1.06 | 4.36E-01 | 5.28E-01 | 396.60   | not significant |
| 7793 | FOXO1      | 1.06 | 3.03E-01 | 3.92E-01 | 10.41    | not significant |
| 7794 | CHIC1      | 1.06 | 2.88E-01 | 3.76E-01 | 365.58   | not significant |
| 7795 | FNTA       | 1.06 | 2.30E-02 | 4.16E-02 | 2573.98  | not significant |
| 7796 | RHOT1      | 1.06 | 2.67E-02 | 4.75E-02 | 2419.85  | not significant |
| 7797 | GTPBP8     | 1.06 | 1.65E-01 | 2.36E-01 | 809.19   | not significant |
| 7798 | HIST1H2BD  | 1.06 | 4.39E-01 | 5.31E-01 | 89.21    | not significant |
| 7799 | MTCH1      | 1.06 | 4.92E-03 | 1.03E-02 | 7386.64  | not significant |
| 7800 | SEPT7-AS1  | 1.06 | 3.83E-01 | 4.75E-01 | 16.93    | not significant |
| 7801 | PSKH1      | 1.06 | 7.38E-02 | 1.17E-01 | 1368.77  | not significant |
| 7802 | MUT        | 1.06 | 1.05E-01 | 1.60E-01 | 1128.66  | not significant |
| 7803 | SAMD13     | 1.06 | 3.94E-01 | 4.86E-01 | 164.05   | not significant |
| 7804 | KLHL15     | 1.06 | 9.16E-02 | 1.41E-01 | 1178.48  | not significant |
| 7805 | TOR3A      | 1.06 | 5.96E-02 | 9.70E-02 | 2708.46  | not significant |
| 7806 | PAQR7      | 1.06 | 4.47E-01 | 5.39E-01 | 47.44    | not significant |
| 7807 | CDC42SE2   | 1.06 | 4.50E-03 | 9.54E-03 | 10555.89 | not significant |
| 7808 | PPP2R3C    | 1.06 | 6.19E-02 | 1.00E-01 | 1585.90  | not significant |
| 7809 | PDZD4      | 1.06 | 4.14E-01 | 5.05E-01 | 23.05    | not significant |
| 7810 | GPT2       | 1.06 | 1.62E-01 | 2.32E-01 | 733.50   | not significant |
| 7811 | HERC2      | 1.06 | 9.25E-02 | 1.43E-01 | 2020.15  | not significant |
| 7812 | RABL2B     | 1.06 | 4.46E-01 | 5.38E-01 | 41.77    | not significant |
| 7813 | POGLUT1    | 1.06 | 1.05E-01 | 1.60E-01 | 1107.46  | not significant |
| 7814 | AKAP8L     | 1.06 | 3.55E-02 | 6.12E-02 | 2423.27  | not significant |
| 7815 | ANTXR1     | 1.06 | 4.13E-02 | 7.00E-02 | 1914.99  | not significant |
| 7816 | HEG1       | 1.06 | 6.24E-02 | 1.01E-01 | 1478.57  | not significant |
| 7817 | TMEM217    | 1.06 | 2.33E-01 | 3.14E-01 | 452.73   | not significant |
| 7818 | PIM1       | 1.06 | 3.61E-03 | 7.79E-03 | 6376.33  | not significant |
| 7819 | TPCN2      | 1.06 | 2.27E-01 | 3.08E-01 | 469.95   | not significant |
| 7820 | FAM177A1   | 1.06 | 2.23E-01 | 3.03E-01 | 473.60   | not significant |

|      |             |      |          |          |          |                 |
|------|-------------|------|----------|----------|----------|-----------------|
| 7821 | MAT2B       | 1.06 | 1.54E-02 | 2.90E-02 | 3795.61  | not significant |
| 7822 | CDKL3       | 1.06 | 4.35E-01 | 5.27E-01 | 87.03    | not significant |
| 7823 | WDPCCP      | 1.06 | 3.39E-01 | 4.30E-01 | 233.03   | not significant |
| 7824 | ARNTL2      | 1.06 | 5.74E-02 | 9.38E-02 | 1776.31  | not significant |
| 7825 | PEX14       | 1.06 | 1.10E-01 | 1.66E-01 | 996.69   | not significant |
| 7826 | UBXN7       | 1.06 | 9.57E-02 | 1.47E-01 | 1525.24  | not significant |
| 7827 | TMEM208     | 1.06 | 1.83E-01 | 2.57E-01 | 962.78   | not significant |
| 7828 | CSTF2T      | 1.06 | 1.91E-02 | 3.51E-02 | 3024.70  | not significant |
| 7829 | MIER3       | 1.06 | 9.19E-02 | 1.42E-01 | 1198.84  | not significant |
| 7830 | ZNF568      | 1.06 | 3.26E-01 | 4.17E-01 | 239.39   | not significant |
| 7831 | SSX2IP      | 1.06 | 6.87E-02 | 1.10E-01 | 1285.89  | not significant |
| 7832 | ACY3        | 1.06 | 4.27E-01 | 5.19E-01 | 88.76    | not significant |
| 7833 | ZNF324      | 1.06 | 2.57E-01 | 3.42E-01 | 421.82   | not significant |
| 7834 | ASF1A       | 1.06 | 2.30E-02 | 4.16E-02 | 2949.32  | not significant |
| 7835 | ZNF382      | 1.06 | 2.60E-01 | 3.45E-01 | 444.97   | not significant |
| 7836 | GLTSCR1     | 1.06 | 1.52E-01 | 2.19E-01 | 714.44   | not significant |
| 7837 | EMC10       | 1.06 | 5.70E-02 | 9.32E-02 | 2935.92  | not significant |
| 7838 | ZNF622      | 1.06 | 1.16E-01 | 1.74E-01 | 964.41   | not significant |
| 7839 | SUV420H2    | 1.06 | 1.29E-01 | 1.91E-01 | 813.19   | not significant |
| 7840 | TAF1L       | 1.06 | 2.92E-01 | 3.80E-01 | 10.88    | not significant |
| 7841 | PCDHGB3     | 1.06 | 3.00E-01 | 3.89E-01 | 9.98     | not significant |
| 7842 | DLGAP4      | 1.06 | 7.20E-02 | 1.14E-01 | 1315.41  | not significant |
| 7843 | PRKAR2A-AS1 | 1.06 | 3.52E-01 | 4.44E-01 | 15.53    | not significant |
| 7844 | MGC16142    | 1.06 | 4.06E-01 | 4.98E-01 | 24.46    | not significant |
| 7845 | MTMR8       | 1.06 | 3.93E-01 | 4.85E-01 | 130.20   | not significant |
| 7846 | PWAR5       | 1.06 | 3.92E-01 | 4.84E-01 | 146.01   | not significant |
| 7847 | UBAP1L      | 1.06 | 3.92E-01 | 4.84E-01 | 23.27    | not significant |
| 7848 | ATAD5       | 1.06 | 4.37E-02 | 7.37E-02 | 3418.97  | not significant |
| 7849 | LOXL2       | 1.06 | 4.39E-01 | 5.31E-01 | 54.06    | not significant |
| 7850 | LOC93622    | 1.06 | 8.44E-02 | 1.32E-01 | 1193.23  | not significant |
| 7851 | CASK        | 1.06 | 1.28E-01 | 1.90E-01 | 805.55   | not significant |
| 7852 | TAOK1       | 1.06 | 3.56E-02 | 6.14E-02 | 4051.23  | not significant |
| 7853 | CDKN2A      | 1.06 | 1.50E-01 | 2.17E-01 | 789.87   | not significant |
| 7854 | ZNF829      | 1.06 | 2.81E-01 | 3.69E-01 | 308.15   | not significant |
| 7855 | C1orf27     | 1.06 | 9.43E-02 | 1.45E-01 | 1027.86  | not significant |
| 7856 | SIPA1       | 1.06 | 1.54E-01 | 2.21E-01 | 668.12   | not significant |
| 7857 | BMP2K       | 1.06 | 6.31E-02 | 1.02E-01 | 1457.84  | not significant |
| 7858 | SARDH       | 1.06 | 4.20E-01 | 5.12E-01 | 93.19    | not significant |
| 7859 | FPGS        | 1.06 | 5.06E-02 | 8.40E-02 | 1660.72  | not significant |
| 7860 | TXNDC16     | 1.06 | 1.14E-01 | 1.71E-01 | 882.05   | not significant |
| 7861 | BIN2        | 1.06 | 4.33E-02 | 7.32E-02 | 1815.18  | not significant |
| 7862 | TTC9        | 1.06 | 1.66E-01 | 2.36E-01 | 621.01   | not significant |
| 7863 | NARFL       | 1.06 | 1.26E-01 | 1.86E-01 | 800.86   | not significant |
| 7864 | ITM2A       | 1.06 | 3.39E-03 | 7.35E-03 | 9448.64  | not significant |
| 7865 | DAK         | 1.06 | 1.28E-01 | 1.89E-01 | 769.96   | not significant |
| 7866 | ACBD5       | 1.06 | 7.92E-02 | 1.24E-01 | 1244.23  | not significant |
| 7867 | TMED7       | 1.06 | 4.93E-02 | 8.20E-02 | 1534.29  | not significant |
| 7868 | PRKAB2      | 1.06 | 4.24E-01 | 5.16E-01 | 41.42    | not significant |
| 7869 | C6orf147    | 1.06 | 3.69E-01 | 4.61E-01 | 161.97   | not significant |
| 7870 | LPIN2       | 1.06 | 1.44E-02 | 2.73E-02 | 3124.28  | not significant |
| 7871 | FBXW2       | 1.06 | 2.57E-02 | 4.59E-02 | 2981.06  | not significant |
| 7872 | KATNBL1     | 1.06 | 1.13E-01 | 1.69E-01 | 866.56   | not significant |
| 7873 | GFPT2       | 1.06 | 4.25E-01 | 5.17E-01 | 35.32    | not significant |
| 7874 | CD226       | 1.06 | 3.33E-01 | 4.24E-01 | 218.57   | not significant |
| 7875 | DNAH6       | 1.06 | 3.84E-01 | 4.76E-01 | 19.60    | not significant |
| 7876 | TASP1       | 1.06 | 1.46E-01 | 2.11E-01 | 772.71   | not significant |
| 7877 | DLG2        | 1.06 | 2.70E-01 | 3.56E-01 | 8.92     | not significant |
| 7878 | RFWD3       | 1.06 | 2.83E-03 | 6.23E-03 | 7631.42  | not significant |
| 7879 | OBFC1       | 1.06 | 4.01E-02 | 6.83E-02 | 1650.35  | not significant |
| 7880 | NPR3        | 1.06 | 2.84E-01 | 3.72E-01 | 10.45    | not significant |
| 7881 | NEU3        | 1.06 | 7.47E-02 | 1.18E-01 | 1576.71  | not significant |
| 7882 | CXXC1       | 1.06 | 3.02E-02 | 5.31E-02 | 2686.94  | not significant |
| 7883 | COL7A1      | 1.06 | 4.28E-01 | 5.20E-01 | 403.70   | not significant |
| 7884 | EIF3G       | 1.06 | 5.81E-03 | 1.20E-02 | 5860.68  | not significant |
| 7885 | IFT172      | 1.06 | 2.93E-01 | 3.82E-01 | 316.10   | not significant |
| 7886 | FAM53A      | 1.06 | 4.28E-01 | 5.21E-01 | 47.28    | not significant |
| 7887 | PLXNA1      | 1.06 | 3.59E-02 | 6.18E-02 | 2495.51  | not significant |
| 7888 | CNEP1R1     | 1.06 | 1.44E-01 | 2.10E-01 | 738.58   | not significant |
| 7889 | KCTD19      | 1.06 | 2.87E-01 | 3.75E-01 | 280.42   | not significant |
| 7890 | KDM7A       | 1.06 | 1.10E-01 | 1.65E-01 | 860.48   | not significant |
| 7891 | FAM169A     | 1.06 | 4.41E-02 | 7.44E-02 | 2105.76  | not significant |
| 7892 | FAM109A     | 1.06 | 3.88E-01 | 4.80E-01 | 131.82   | not significant |
| 7893 | ZNF599      | 1.06 | 3.54E-01 | 4.46E-01 | 168.56   | not significant |
| 7894 | KIAA1257    | 1.06 | 3.48E-01 | 4.39E-01 | 15.44    | not significant |
| 7895 | TINAGL1     | 1.06 | 4.20E-01 | 5.12E-01 | 41.44    | not significant |
| 7896 | LOC554206   | 1.06 | 3.80E-01 | 4.72E-01 | 22.56    | not significant |
| 7897 | MRPL34      | 1.06 | 6.70E-02 | 1.07E-01 | 1770.62  | not significant |
| 7898 | AKT3        | 1.07 | 6.03E-02 | 9.79E-02 | 1529.28  | not significant |
| 7899 | ESYT3       | 1.07 | 4.18E-01 | 5.10E-01 | 41.65    | not significant |
| 7900 | CMC4        | 1.07 | 4.12E-01 | 5.04E-01 | 34.70    | not significant |
| 7901 | KCTD2       | 1.07 | 4.51E-02 | 7.58E-02 | 2394.48  | not significant |
| 7902 | SND1        | 1.07 | 1.68E-03 | 3.84E-03 | 11219.45 | not significant |
| 7903 | TMEM115     | 1.07 | 1.16E-01 | 1.73E-01 | 940.26   | not significant |
| 7904 | GSE1        | 1.07 | 1.97E-02 | 3.62E-02 | 5889.18  | not significant |
| 7905 | PGAM2       | 1.07 | 2.38E-01 | 3.21E-01 | 8.77     | not significant |
| 7906 | CELF2       | 1.07 | 1.08E-02 | 2.11E-02 | 9803.83  | not significant |
| 7907 | NDUFV2-AS1  | 1.07 | 3.11E-01 | 4.01E-01 | 13.16    | not significant |
| 7908 | BCL11B      | 1.07 | 3.18E-03 | 6.93E-03 | 9597.09  | not significant |

|      |              |      |          |          |          |                 |
|------|--------------|------|----------|----------|----------|-----------------|
| 7909 | ZMYND8       | 1.07 | 8.80E-02 | 1.37E-01 | 1041.36  | not significant |
| 7910 | FANCB        | 1.07 | 2.06E-01 | 2.84E-01 | 481.51   | not significant |
| 7911 | AAMDC        | 1.07 | 3.81E-01 | 4.73E-01 | 125.99   | not significant |
| 7912 | CD99L2       | 1.07 | 2.87E-01 | 3.75E-01 | 293.23   | not significant |
| 7913 | RGS2         | 1.07 | 3.93E-01 | 4.85E-01 | 111.55   | not significant |
| 7914 | KCTD17       | 1.07 | 2.11E-01 | 2.89E-01 | 431.25   | not significant |
| 7915 | DLL3         | 1.07 | 4.19E-01 | 5.10E-01 | 45.90    | not significant |
| 7916 | SLC11A2      | 1.07 | 3.70E-02 | 6.35E-02 | 2424.19  | not significant |
| 7917 | FLT3         | 1.07 | 3.93E-01 | 4.85E-01 | 27.02    | not significant |
| 7918 | DCAF17       | 1.07 | 2.99E-02 | 5.26E-02 | 1828.25  | not significant |
| 7919 | ACVR1B       | 1.07 | 3.02E-02 | 5.31E-02 | 1893.72  | not significant |
| 7920 | L3HYPDH      | 1.07 | 3.83E-01 | 4.75E-01 | 116.07   | not significant |
| 7921 | ZFPM2        | 1.07 | 3.92E-01 | 4.84E-01 | 105.87   | not significant |
| 7922 | CAPN7        | 1.07 | 4.28E-02 | 7.22E-02 | 1648.35  | not significant |
| 7923 | ATP5D        | 1.07 | 2.46E-01 | 3.30E-01 | 2358.30  | not significant |
| 7924 | NFIA         | 1.07 | 2.90E-01 | 3.78E-01 | 11.04    | not significant |
| 7925 | ZKSCAN7      | 1.07 | 3.58E-01 | 4.50E-01 | 147.72   | not significant |
| 7926 | NAIF1        | 1.07 | 1.74E-01 | 2.46E-01 | 552.81   | not significant |
| 7927 | WDR76        | 1.07 | 1.36E-02 | 2.60E-02 | 2663.31  | not significant |
| 7928 | POLD3        | 1.07 | 1.31E-02 | 2.50E-02 | 2760.33  | not significant |
| 7929 | OTUD4        | 1.07 | 3.26E-02 | 5.69E-02 | 2669.98  | not significant |
| 7930 | JMJD7        | 1.07 | 4.08E-01 | 4.99E-01 | 84.31    | not significant |
| 7931 | MST1L        | 1.07 | 3.34E-01 | 4.25E-01 | 15.18    | not significant |
| 7932 | BDH1         | 1.07 | 5.84E-02 | 9.52E-02 | 1279.41  | not significant |
| 7933 | B3GALNT2     | 1.07 | 2.66E-02 | 4.74E-02 | 2101.98  | not significant |
| 7934 | MDGA1        | 1.07 | 3.98E-01 | 4.90E-01 | 92.80    | not significant |
| 7935 | MGST3        | 1.07 | 1.87E-01 | 2.62E-01 | 465.27   | not significant |
| 7936 | TSN          | 1.07 | 6.11E-03 | 1.26E-02 | 4543.40  | not significant |
| 7937 | TMEM67       | 1.07 | 2.28E-01 | 3.10E-01 | 374.07   | not significant |
| 7938 | ZNF559       | 1.07 | 1.53E-01 | 2.20E-01 | 611.26   | not significant |
| 7939 | AUP1         | 1.07 | 1.60E-02 | 3.00E-02 | 4017.07  | not significant |
| 7940 | FBXO30       | 1.07 | 1.30E-01 | 1.91E-01 | 758.24   | not significant |
| 7941 | TM7SF3       | 1.07 | 1.43E-03 | 3.33E-03 | 11494.29 | not significant |
| 7942 | LINC00476    | 1.07 | 3.21E-01 | 4.12E-01 | 204.07   | not significant |
| 7943 | SLC46A3      | 1.07 | 1.09E-01 | 1.64E-01 | 836.16   | not significant |
| 7944 | CBX3P2       | 1.07 | 4.07E-01 | 4.99E-01 | 37.09    | not significant |
| 7945 | CENPM        | 1.07 | 2.26E-02 | 4.09E-02 | 2626.10  | not significant |
| 7946 | ANKRD49      | 1.07 | 1.57E-01 | 2.26E-01 | 774.10   | not significant |
| 7947 | TRMT2B       | 1.07 | 3.82E-02 | 6.54E-02 | 1644.00  | not significant |
| 7948 | ACTR5        | 1.07 | 1.31E-01 | 1.92E-01 | 673.72   | not significant |
| 7949 | ZNF423       | 1.07 | 4.19E-02 | 7.09E-02 | 1762.33  | not significant |
| 7950 | H3F3C        | 1.07 | 4.10E-01 | 5.02E-01 | 50.15    | not significant |
| 7951 | PRC1         | 1.07 | 7.32E-03 | 1.48E-02 | 3275.77  | not significant |
| 7952 | SMCR8        | 1.07 | 1.63E-02 | 3.05E-02 | 2568.12  | not significant |
| 7953 | DHX8         | 1.07 | 1.48E-02 | 2.80E-02 | 2647.95  | not significant |
| 7954 | SLC16A10     | 1.07 | 2.40E-01 | 3.22E-01 | 407.32   | not significant |
| 7955 | SLC8A1       | 1.07 | 3.53E-01 | 4.45E-01 | 157.81   | not significant |
| 7956 | P4K2B        | 1.07 | 1.70E-02 | 3.17E-02 | 2657.47  | not significant |
| 7957 | IL11RA       | 1.07 | 3.43E-01 | 4.34E-01 | 173.37   | not significant |
| 7958 | WASH2P       | 1.07 | 3.94E-01 | 4.86E-01 | 96.68    | not significant |
| 7959 | TMEM120A     | 1.07 | 2.94E-01 | 3.83E-01 | 227.80   | not significant |
| 7960 | PLEKHA3      | 1.07 | 1.48E-01 | 2.15E-01 | 615.76   | not significant |
| 7961 | RANBP10      | 1.07 | 2.11E-02 | 3.86E-02 | 1987.92  | not significant |
| 7962 | FBXO7        | 1.07 | 1.84E-02 | 3.40E-02 | 3918.14  | not significant |
| 7963 | C8orf59      | 1.07 | 4.01E-02 | 6.82E-02 | 1719.07  | not significant |
| 7964 | C18orf54     | 1.07 | 1.67E-01 | 2.38E-01 | 574.32   | not significant |
| 7965 | ARHGEF9      | 1.07 | 3.33E-01 | 4.24E-01 | 170.39   | not significant |
| 7966 | OXCT1        | 1.07 | 1.49E-02 | 2.81E-02 | 4788.92  | not significant |
| 7967 | CDC42SE1     | 1.07 | 5.07E-03 | 1.06E-02 | 3673.60  | not significant |
| 7968 | IL6ST        | 1.07 | 1.54E-01 | 2.21E-01 | 714.28   | not significant |
| 7969 | TM9SF3       | 1.07 | 1.98E-03 | 4.47E-03 | 7809.68  | not significant |
| 7970 | STAR4-AS1    | 1.07 | 4.08E-01 | 4.99E-01 | 54.25    | not significant |
| 7971 | LOC100129148 | 1.07 | 3.98E-01 | 4.90E-01 | 53.72    | not significant |
| 7972 | SMG5         | 1.07 | 3.21E-03 | 7.00E-03 | 5867.61  | not significant |
| 7973 | LSM2         | 1.07 | 7.01E-02 | 1.12E-01 | 1020.72  | not significant |
| 7974 | LOC729970    | 1.07 | 3.26E-01 | 4.17E-01 | 18.57    | not significant |
| 7975 | CTBP1-AS     | 1.07 | 3.74E-01 | 4.66E-01 | 34.16    | not significant |
| 7976 | PCDHGB1      | 1.07 | 3.07E-01 | 3.97E-01 | 13.49    | not significant |
| 7977 | ZNF557       | 1.07 | 1.82E-01 | 2.55E-01 | 452.92   | not significant |
| 7978 | PLEKHF1      | 1.07 | 1.43E-01 | 2.08E-01 | 586.79   | not significant |
| 7979 | FBXW4P1      | 1.07 | 3.84E-01 | 4.76E-01 | 29.38    | not significant |
| 7980 | SLC7A3       | 1.07 | 4.03E-01 | 4.95E-01 | 46.92    | not significant |
| 7981 | XIAP         | 1.07 | 3.80E-02 | 6.51E-02 | 2442.64  | not significant |
| 7982 | KDM6B        | 1.07 | 7.40E-02 | 1.17E-01 | 1173.80  | not significant |
| 7983 | SHPK         | 1.07 | 1.06E-01 | 1.61E-01 | 784.22   | not significant |
| 7984 | RNASSET2     | 1.07 | 9.89E-02 | 1.51E-01 | 816.08   | not significant |
| 7985 | ENTPD1       | 1.07 | 2.96E-01 | 3.85E-01 | 12.89    | not significant |
| 7986 | AFF4         | 1.07 | 2.52E-02 | 4.52E-02 | 3875.06  | not significant |
| 7987 | LINC00337    | 1.07 | 3.11E-01 | 4.01E-01 | 13.87    | not significant |
| 7988 | PTPRF        | 1.07 | 3.95E-01 | 4.87E-01 | 74.40    | not significant |
| 7989 | CTNNAL1      | 1.07 | 5.50E-02 | 9.05E-02 | 1381.25  | not significant |
| 7990 | LOC101927572 | 1.07 | 4.00E-01 | 4.92E-01 | 50.89    | not significant |
| 7991 | SYNE2        | 1.07 | 2.39E-01 | 3.22E-01 | 6887.37  | not significant |
| 7992 | EMILIN1      | 1.07 | 3.69E-01 | 4.61E-01 | 27.21    | not significant |
| 7993 | ZNF7         | 1.07 | 1.30E-01 | 1.92E-01 | 785.43   | not significant |
| 7994 | TUBD1        | 1.07 | 1.80E-01 | 2.54E-01 | 460.46   | not significant |
| 7995 | ARHGAP31     | 1.07 | 3.96E-01 | 4.88E-01 | 41.04    | not significant |
| 7996 | CDCA7        | 1.07 | 1.17E-03 | 2.76E-03 | 11288.48 | not significant |

|      |              |      |          |          |          |                 |
|------|--------------|------|----------|----------|----------|-----------------|
| 7997 | ALCAM        | 1.07 | 1.11E-01 | 1.67E-01 | 737.68   | not significant |
| 7998 | HECTD4       | 1.07 | 2.86E-01 | 3.74E-01 | 3694.85  | not significant |
| 7999 | ZFAND3       | 1.07 | 1.06E-02 | 2.06E-02 | 2951.51  | not significant |
| 8000 | MGAT5        | 1.07 | 1.19E-02 | 2.29E-02 | 3076.00  | not significant |
| 8001 | PAPOLG       | 1.07 | 4.35E-02 | 7.34E-02 | 1445.43  | not significant |
| 8002 | PSTK         | 1.07 | 3.25E-01 | 4.16E-01 | 189.26   | not significant |
| 8003 | TBC1D22A     | 1.07 | 6.24E-02 | 1.01E-01 | 1144.03  | not significant |
| 8004 | LOC100129518 | 1.07 | 3.95E-01 | 4.87E-01 | 42.36    | not significant |
| 8005 | DBH-AS1      | 1.07 | 3.97E-01 | 4.89E-01 | 57.34    | not significant |
| 8006 | USP30        | 1.07 | 9.82E-02 | 1.50E-01 | 879.62   | not significant |
| 8007 | MED29        | 1.07 | 3.60E-02 | 6.20E-02 | 1577.00  | not significant |
| 8008 | GPR158       | 1.07 | 3.58E-01 | 4.50E-01 | 23.42    | not significant |
| 8009 | HMBOX1       | 1.07 | 1.23E-01 | 1.83E-01 | 749.51   | not significant |
| 8010 | STARD7-AS1   | 1.07 | 3.36E-01 | 4.27E-01 | 149.44   | not significant |
| 8011 | APLP2        | 1.07 | 2.76E-03 | 6.07E-03 | 6323.22  | not significant |
| 8012 | SEC22A       | 1.07 | 1.57E-01 | 2.25E-01 | 497.57   | not significant |
| 8013 | TRAF3        | 1.07 | 6.40E-03 | 1.31E-02 | 4499.70  | not significant |
| 8014 | ZNF197       | 1.07 | 5.05E-02 | 8.39E-02 | 1339.55  | not significant |
| 8015 | TSHR         | 1.07 | 2.23E-02 | 4.04E-02 | 1711.94  | not significant |
| 8016 | CSNK2B       | 1.07 | 7.33E-03 | 1.48E-02 | 2885.78  | not significant |
| 8017 | NUTM2A       | 1.07 | 3.10E-01 | 4.00E-01 | 16.28    | not significant |
| 8018 | ETS1         | 1.07 | 6.14E-04 | 1.53E-03 | 20603.79 | not significant |
| 8019 | FAM217B      | 1.07 | 8.19E-03 | 1.64E-02 | 4023.73  | not significant |
| 8020 | EXTL3        | 1.07 | 1.25E-02 | 2.40E-02 | 2799.48  | not significant |
| 8021 | SELO         | 1.07 | 1.62E-01 | 2.32E-01 | 770.56   | not significant |
| 8022 | CPEB3        | 1.07 | 3.27E-01 | 4.18E-01 | 153.36   | not significant |
| 8023 | TMEM245      | 1.07 | 5.39E-03 | 1.12E-02 | 3531.32  | not significant |
| 8024 | ACADS        | 1.07 | 8.54E-02 | 1.33E-01 | 800.22   | not significant |
| 8025 | RNF121       | 1.07 | 1.28E-01 | 1.89E-01 | 633.21   | not significant |
| 8026 | LYRM2        | 1.07 | 2.74E-02 | 4.88E-02 | 1696.58  | not significant |
| 8027 | PNISR        | 1.07 | 1.54E-01 | 2.22E-01 | 6134.41  | not significant |
| 8028 | TMEM19       | 1.07 | 1.35E-02 | 2.58E-02 | 2090.08  | not significant |
| 8029 | MED28        | 1.07 | 9.95E-03 | 1.95E-02 | 2692.62  | not significant |
| 8030 | PDCL3P4      | 1.07 | 3.79E-01 | 4.70E-01 | 37.61    | not significant |
| 8031 | BEND4        | 1.07 | 2.87E-02 | 5.08E-02 | 1816.68  | not significant |
| 8032 | PLK4         | 1.07 | 2.07E-03 | 4.67E-03 | 4563.66  | not significant |
| 8033 | FAM120C      | 1.07 | 3.85E-01 | 4.77E-01 | 51.51    | not significant |
| 8034 | ARID1A       | 1.07 | 1.60E-01 | 2.29E-01 | 11272.22 | not significant |
| 8035 | UVSSA        | 1.07 | 1.76E-01 | 2.49E-01 | 465.45   | not significant |
| 8036 | EXOC1        | 1.07 | 8.05E-02 | 1.26E-01 | 924.46   | not significant |
| 8037 | VPS28        | 1.07 | 6.70E-02 | 1.07E-01 | 1133.85  | not significant |
| 8038 | DIP2C        | 1.07 | 3.86E-01 | 4.78E-01 | 55.44    | not significant |
| 8039 | TBC1D30      | 1.07 | 2.33E-01 | 3.15E-01 | 9.66     | not significant |
| 8040 | B9D1         | 1.07 | 3.86E-01 | 4.78E-01 | 59.11    | not significant |
| 8041 | PRKAR1A      | 1.07 | 1.77E-03 | 4.03E-03 | 9152.18  | not significant |
| 8042 | PDP1         | 1.07 | 1.79E-02 | 3.33E-02 | 1975.45  | not significant |
| 8043 | PPP6R2       | 1.07 | 1.62E-02 | 3.04E-02 | 2826.45  | not significant |
| 8044 | PHIP         | 1.07 | 2.49E-01 | 3.33E-01 | 4631.39  | not significant |
| 8045 | ARHGAP1      | 1.07 | 1.87E-02 | 3.46E-02 | 2048.28  | not significant |
| 8046 | ATP6V1H      | 1.07 | 3.34E-02 | 5.81E-02 | 1982.37  | not significant |
| 8047 | BBS10        | 1.07 | 1.34E-01 | 1.96E-01 | 656.48   | not significant |
| 8048 | MEN1         | 1.07 | 1.35E-02 | 2.58E-02 | 3551.27  | not significant |
| 8049 | ARHGAP44     | 1.07 | 3.57E-01 | 4.49E-01 | 27.63    | not significant |
| 8050 | ADAMTS17     | 1.07 | 2.85E-01 | 3.73E-01 | 13.48    | not significant |
| 8051 | TNFSF14      | 1.07 | 3.42E-01 | 4.33E-01 | 26.87    | not significant |
| 8052 | GIT1         | 1.07 | 2.85E-03 | 6.25E-03 | 4708.66  | not significant |
| 8053 | SP3          | 1.07 | 8.50E-04 | 2.06E-03 | 5300.26  | not significant |
| 8054 | LOC729218    | 1.07 | 1.12E-01 | 1.68E-01 | 765.19   | not significant |
| 8055 | GPR68        | 1.07 | 1.26E-01 | 1.87E-01 | 622.60   | not significant |
| 8056 | SPINT1       | 1.07 | 3.82E-01 | 4.74E-01 | 49.22    | not significant |
| 8057 | MBD4         | 1.07 | 1.38E-02 | 2.63E-02 | 2261.00  | not significant |
| 8058 | BTAF1        | 1.07 | 2.02E-01 | 2.79E-01 | 4329.03  | not significant |
| 8059 | PAXBP1       | 1.07 | 2.00E-01 | 2.77E-01 | 2700.35  | not significant |
| 8060 | CHN2         | 1.07 | 8.02E-03 | 1.61E-02 | 2520.74  | not significant |
| 8061 | CASP1        | 1.07 | 1.36E-01 | 1.99E-01 | 565.89   | not significant |
| 8062 | ZNF724P      | 1.07 | 3.66E-01 | 4.58E-01 | 74.19    | not significant |
| 8063 | LOC653653    | 1.07 | 2.98E-01 | 3.86E-01 | 15.07    | not significant |
| 8064 | LAMP3        | 1.07 | 1.84E-01 | 2.58E-01 | 406.21   | not significant |
| 8065 | TRMT1        | 1.07 | 4.04E-02 | 6.87E-02 | 1681.82  | not significant |
| 8066 | PTPN4        | 1.07 | 3.47E-02 | 6.01E-02 | 1436.59  | not significant |
| 8067 | TSPAN14      | 1.07 | 1.47E-02 | 2.78E-02 | 2040.94  | not significant |
| 8068 | NFIB         | 1.07 | 2.68E-01 | 3.54E-01 | 11.91    | not significant |
| 8069 | SCUBE1       | 1.07 | 3.05E-01 | 3.95E-01 | 15.98    | not significant |
| 8070 | KLHL7        | 1.07 | 3.45E-02 | 5.98E-02 | 1660.21  | not significant |
| 8071 | UTRN         | 1.07 | 1.52E-01 | 2.19E-01 | 4155.30  | not significant |
| 8072 | ACOT1        | 1.07 | 3.50E-01 | 4.42E-01 | 28.98    | not significant |
| 8073 | DHRS3        | 1.07 | 2.52E-01 | 3.37E-01 | 257.12   | not significant |
| 8074 | ILVBL        | 1.07 | 7.25E-02 | 1.15E-01 | 1214.40  | not significant |
| 8075 | DDX3Y        | 1.07 | 3.21E-03 | 6.99E-03 | 6839.68  | not significant |
| 8076 | SLC23A3      | 1.07 | 3.47E-01 | 4.38E-01 | 24.58    | not significant |
| 8077 | WDR70        | 1.07 | 8.59E-02 | 1.34E-01 | 898.60   | not significant |
| 8078 | TMEM42       | 1.07 | 2.65E-01 | 3.51E-01 | 224.67   | not significant |
| 8079 | CXorf65      | 1.07 | 3.77E-01 | 4.69E-01 | 64.56    | not significant |
| 8080 | HMGCS1       | 1.07 | 3.55E-03 | 7.66E-03 | 7957.72  | not significant |
| 8081 | ZC3HAV1      | 1.07 | 1.29E-01 | 1.90E-01 | 7850.20  | not significant |
| 8082 | SPATA33      | 1.07 | 2.08E-01 | 2.86E-01 | 355.29   | not significant |
| 8083 | OS9          | 1.07 | 1.56E-03 | 3.61E-03 | 4372.60  | not significant |
| 8084 | KLF13        | 1.07 | 5.67E-03 | 1.17E-02 | 6263.65  | not significant |

|      |              |      |          |          |         |                 |
|------|--------------|------|----------|----------|---------|-----------------|
| 8085 | SLC6A16      | 1.07 | 3.74E-01 | 4.66E-01 | 43.71   | not significant |
| 8086 | CENPN        | 1.07 | 6.51E-03 | 1.33E-02 | 3631.27 | not significant |
| 8087 | BBX          | 1.07 | 7.99E-03 | 1.60E-02 | 2692.31 | not significant |
| 8088 | MBNL3        | 1.07 | 1.20E-02 | 2.32E-02 | 5657.74 | not significant |
| 8089 | LOC100129034 | 1.07 | 1.79E-01 | 2.52E-01 | 383.59  | not significant |
| 8090 | SPG7         | 1.07 | 1.78E-02 | 3.29E-02 | 1927.74 | not significant |
| 8091 | TNK1         | 1.07 | 3.63E-01 | 4.55E-01 | 82.97   | not significant |
| 8092 | IAH1         | 1.07 | 6.36E-02 | 1.03E-01 | 1154.97 | not significant |
| 8093 | POMGNT1      | 1.07 | 8.00E-03 | 1.60E-02 | 2569.17 | not significant |
| 8094 | EEPD1        | 1.07 | 2.66E-02 | 4.73E-02 | 1584.58 | not significant |
| 8095 | FMNL3        | 1.07 | 4.60E-03 | 9.73E-03 | 3522.32 | not significant |
| 8096 | GCLC         | 1.07 | 1.52E-02 | 2.86E-02 | 2147.85 | not significant |
| 8097 | MSANTD2      | 1.07 | 2.81E-01 | 3.69E-01 | 241.61  | not significant |
| 8098 | LEMD3        | 1.07 | 8.48E-03 | 1.69E-02 | 2414.32 | not significant |
| 8099 | TGFBR2       | 1.07 | 7.41E-02 | 1.17E-01 | 798.49  | not significant |
| 8100 | ZNF737       | 1.07 | 3.71E-01 | 4.63E-01 | 54.20   | not significant |
| 8101 | ZBTB21       | 1.07 | 3.40E-02 | 5.90E-02 | 1412.59 | not significant |
| 8102 | MADD         | 1.07 | 5.33E-03 | 1.11E-02 | 2980.97 | not significant |
| 8103 | BARD1        | 1.07 | 1.88E-02 | 3.47E-02 | 1717.54 | not significant |
| 8104 | LAMTOR3      | 1.07 | 3.14E-02 | 5.50E-02 | 1461.68 | not significant |
| 8105 | RIMKLB       | 1.07 | 9.40E-02 | 1.45E-01 | 1002.72 | not significant |
| 8106 | TBC1D2B      | 1.07 | 1.85E-02 | 3.42E-02 | 1705.33 | not significant |
| 8107 | SSBP2        | 1.07 | 1.56E-02 | 2.94E-02 | 2104.88 | not significant |
| 8108 | SIRT2        | 1.07 | 1.93E-02 | 3.55E-02 | 1658.19 | not significant |
| 8109 | DQX1         | 1.07 | 2.22E-01 | 3.02E-01 | 9.63    | not significant |
| 8110 | DNAJC12      | 1.07 | 3.67E-01 | 4.59E-01 | 37.34   | not significant |
| 8111 | AFG3L1P      | 1.07 | 7.19E-02 | 1.14E-01 | 974.89  | not significant |
| 8112 | TMBIM4       | 1.07 | 2.31E-02 | 4.17E-02 | 1578.17 | not significant |
| 8113 | CPSF3L       | 1.07 | 1.29E-02 | 2.47E-02 | 2454.84 | not significant |
| 8114 | AGFG2        | 1.07 | 8.76E-02 | 1.36E-01 | 708.42  | not significant |
| 8115 | NUP50-AS1    | 1.07 | 1.93E-01 | 2.69E-01 | 381.04  | not significant |
| 8116 | NANOS1       | 1.07 | 2.50E-01 | 3.34E-01 | 242.35  | not significant |
| 8117 | DDX11        | 1.07 | 3.56E-02 | 6.14E-02 | 2876.18 | not significant |
| 8118 | LOC100507437 | 1.07 | 2.34E-01 | 3.16E-01 | 10.62   | not significant |
| 8119 | SMG9         | 1.07 | 7.24E-03 | 1.46E-02 | 2417.96 | not significant |
| 8120 | GRK4         | 1.07 | 3.52E-01 | 4.44E-01 | 99.95   | not significant |
| 8121 | GSK3A        | 1.07 | 3.44E-03 | 7.45E-03 | 3565.45 | not significant |
| 8122 | ZNF592       | 1.07 | 1.60E-02 | 2.99E-02 | 1886.82 | not significant |
| 8123 | PAX9         | 1.07 | 1.43E-01 | 2.09E-01 | 483.81  | not significant |
| 8124 | MED21        | 1.07 | 2.17E-02 | 3.94E-02 | 1677.81 | not significant |
| 8125 | NPIPA1       | 1.07 | 3.56E-01 | 4.47E-01 | 82.97   | not significant |
| 8126 | CPT1A        | 1.07 | 7.09E-03 | 1.44E-02 | 3614.66 | not significant |
| 8127 | ZNF620       | 1.07 | 2.73E-01 | 3.59E-01 | 17.43   | not significant |
| 8128 | MIR4435-1HG  | 1.07 | 3.31E-01 | 4.22E-01 | 127.40  | not significant |
| 8129 | LINC01237    | 1.08 | 3.64E-01 | 4.56E-01 | 61.88   | not significant |
| 8130 | PLCH2        | 1.08 | 2.60E-01 | 3.45E-01 | 12.53   | not significant |
| 8131 | LIN9         | 1.08 | 4.78E-02 | 8.00E-02 | 1088.83 | not significant |
| 8132 | ARGLU1       | 1.08 | 1.83E-01 | 2.56E-01 | 5796.48 | not significant |
| 8133 | ANKS3        | 1.08 | 2.17E-01 | 2.96E-01 | 283.10  | not significant |
| 8134 | LOXL1-AS1    | 1.08 | 3.40E-01 | 4.31E-01 | 100.54  | not significant |
| 8135 | CACFD1       | 1.08 | 2.81E-01 | 3.68E-01 | 16.08   | not significant |
| 8136 | SPTLC2       | 1.08 | 3.54E-03 | 7.66E-03 | 4289.49 | not significant |
| 8137 | LOC100130705 | 1.08 | 3.56E-01 | 4.48E-01 | 34.11   | not significant |
| 8138 | C6orf62      | 1.08 | 1.01E-03 | 2.41E-03 | 6205.13 | not significant |
| 8139 | ERLEC1       | 1.08 | 1.30E-02 | 2.49E-02 | 2227.35 | not significant |
| 8140 | RAB3IP       | 1.08 | 1.70E-02 | 3.17E-02 | 1673.63 | not significant |
| 8141 | MSH3         | 1.08 | 2.26E-02 | 4.09E-02 | 1441.12 | not significant |
| 8142 | PCDH10       | 1.08 | 3.57E-01 | 4.49E-01 | 72.91   | not significant |
| 8143 | CAMK2G       | 1.08 | 1.51E-02 | 2.85E-02 | 2272.28 | not significant |
| 8144 | RNLS         | 1.08 | 2.22E-03 | 4.96E-03 | 4760.15 | not significant |
| 8145 | BHLHB9       | 1.08 | 2.14E-01 | 2.93E-01 | 302.48  | not significant |
| 8146 | NRROS        | 1.08 | 6.10E-04 | 1.52E-03 | 5601.43 | not significant |
| 8147 | ADAL         | 1.08 | 1.22E-01 | 1.81E-01 | 531.73  | not significant |
| 8148 | NEGR1        | 1.08 | 2.03E-01 | 2.81E-01 | 8.90    | not significant |
| 8149 | WTIP         | 1.08 | 3.64E-01 | 4.56E-01 | 56.20   | not significant |
| 8150 | PABPN1       | 1.08 | 1.31E-01 | 1.92E-01 | 654.25  | not significant |
| 8151 | CATSPER2     | 1.08 | 1.69E-01 | 2.40E-01 | 7.30    | not significant |
| 8152 | LOC401127    | 1.08 | 3.06E-01 | 3.96E-01 | 18.55   | not significant |
| 8153 | AFF3         | 1.08 | 3.23E-02 | 5.65E-02 | 1462.19 | not significant |
| 8154 | ELK1         | 1.08 | 9.88E-03 | 1.94E-02 | 2233.91 | not significant |
| 8155 | AP2A1        | 1.08 | 5.71E-03 | 1.18E-02 | 3161.69 | not significant |
| 8156 | CNTLN        | 1.08 | 4.79E-02 | 8.01E-02 | 996.44  | not significant |
| 8157 | NVL          | 1.08 | 2.04E-02 | 3.73E-02 | 1571.78 | not significant |
| 8158 | CCDC154      | 1.08 | 2.87E-01 | 3.75E-01 | 16.83   | not significant |
| 8159 | MFSD6        | 1.08 | 5.34E-03 | 1.11E-02 | 3558.36 | not significant |
| 8160 | HLA-J        | 1.08 | 2.31E-01 | 3.13E-01 | 10.43   | not significant |
| 8161 | SNAPC3       | 1.08 | 2.62E-02 | 4.68E-02 | 1382.59 | not significant |
| 8162 | PRRT4        | 1.08 | 3.48E-01 | 4.40E-01 | 32.90   | not significant |
| 8163 | ZDHHC18      | 1.08 | 1.74E-02 | 3.23E-02 | 2031.82 | not significant |
| 8164 | TMEM116      | 1.08 | 1.94E-01 | 2.69E-01 | 331.77  | not significant |
| 8165 | RUSC1        | 1.08 | 4.35E-02 | 7.34E-02 | 1122.18 | not significant |
| 8166 | GOLGA3       | 1.08 | 3.14E-04 | 8.25E-04 | 7469.24 | not significant |
| 8167 | STK24        | 1.08 | 7.57E-04 | 1.85E-03 | 7181.70 | not significant |
| 8168 | FAM127A      | 1.08 | 2.80E-01 | 3.67E-01 | 170.95  | not significant |
| 8169 | ATP11C       | 1.08 | 1.67E-02 | 3.12E-02 | 2053.11 | not significant |
| 8170 | AGAP6        | 1.08 | 3.46E-01 | 4.38E-01 | 81.14   | not significant |
| 8171 | RAB40B       | 1.08 | 3.59E-01 | 4.51E-01 | 46.65   | not significant |
| 8172 | LINC00672    | 1.08 | 3.57E-01 | 4.49E-01 | 50.37   | not significant |

|      |               |      |          |          |          |                 |
|------|---------------|------|----------|----------|----------|-----------------|
| 8173 | SYPL1         | 1.08 | 9.79E-04 | 2.34E-03 | 8101.11  | not significant |
| 8174 | LRRC46        | 1.08 | 3.54E-01 | 4.46E-01 | 43.56    | not significant |
| 8175 | SLC25A11      | 1.08 | 1.20E-02 | 2.32E-02 | 2075.22  | not significant |
| 8176 | MED14         | 1.08 | 6.26E-03 | 1.28E-02 | 3194.10  | not significant |
| 8177 | DLGAP1-AS1    | 1.08 | 3.49E-01 | 4.40E-01 | 83.99    | not significant |
| 8178 | MAP3K5        | 1.08 | 3.57E-01 | 4.48E-01 | 52.43    | not significant |
| 8179 | LYST          | 1.08 | 1.47E-01 | 2.13E-01 | 460.41   | not significant |
| 8180 | TTBK2         | 1.08 | 1.25E-01 | 1.85E-01 | 505.48   | not significant |
| 8181 | MFN1          | 1.08 | 5.17E-02 | 8.56E-02 | 939.34   | not significant |
| 8182 | CARD8         | 1.08 | 1.47E-02 | 2.78E-02 | 2004.87  | not significant |
| 8183 | DOC2GP        | 1.08 | 2.24E-01 | 3.04E-01 | 10.91    | not significant |
| 8184 | NLGN4Y        | 1.08 | 2.00E-01 | 2.77E-01 | 330.03   | not significant |
| 8185 | ZNF215        | 1.08 | 1.20E-01 | 1.79E-01 | 519.63   | not significant |
| 8186 | FAM161A       | 1.08 | 1.21E-01 | 1.80E-01 | 531.78   | not significant |
| 8187 | CD72          | 1.08 | 2.91E-01 | 3.79E-01 | 18.31    | not significant |
| 8188 | WASH3P        | 1.08 | 2.62E-01 | 3.47E-01 | 187.48   | not significant |
| 8189 | COP55         | 1.08 | 9.05E-03 | 1.79E-02 | 3312.23  | not significant |
| 8190 | ZNF813        | 1.08 | 1.02E-01 | 1.55E-01 | 619.50   | not significant |
| 8191 | SDF2          | 1.08 | 4.94E-02 | 8.22E-02 | 1017.83  | not significant |
| 8192 | NENF          | 1.08 | 5.96E-02 | 9.70E-02 | 1148.58  | not significant |
| 8193 | IFT80         | 1.08 | 3.57E-02 | 6.15E-02 | 1192.11  | not significant |
| 8194 | RB1CC1        | 1.08 | 2.62E-03 | 5.81E-03 | 3023.75  | not significant |
| 8195 | ERI3-IT1      | 1.08 | 2.75E-01 | 3.61E-01 | 16.55    | not significant |
| 8196 | RMDN1         | 1.08 | 1.11E-02 | 2.15E-02 | 1894.80  | not significant |
| 8197 | MSTO2P        | 1.08 | 2.87E-01 | 3.76E-01 | 160.32   | not significant |
| 8198 | ZCCHC11       | 1.08 | 1.31E-03 | 3.06E-03 | 4501.12  | not significant |
| 8199 | RAD51         | 1.08 | 1.19E-02 | 2.29E-02 | 1929.48  | not significant |
| 8200 | CTBP1         | 1.08 | 3.85E-03 | 8.28E-03 | 8980.72  | not significant |
| 8201 | STRN4         | 1.08 | 3.62E-03 | 7.80E-03 | 3545.92  | not significant |
| 8202 | UBE2Z         | 1.08 | 5.30E-03 | 1.11E-02 | 2856.96  | not significant |
| 8203 | CCDC15        | 1.08 | 1.25E-01 | 1.85E-01 | 540.78   | not significant |
| 8204 | FAM171B       | 1.08 | 3.50E-01 | 4.41E-01 | 49.52    | not significant |
| 8205 | SMCO2         | 1.08 | 2.45E-01 | 3.28E-01 | 13.54    | not significant |
| 8206 | UCKL1         | 1.08 | 3.47E-02 | 6.00E-02 | 1130.34  | not significant |
| 8207 | LOC145783     | 1.08 | 2.33E-01 | 3.15E-01 | 283.51   | not significant |
| 8208 | HPS6          | 1.08 | 9.11E-02 | 1.41E-01 | 612.52   | not significant |
| 8209 | FRMD8         | 1.08 | 1.63E-02 | 3.04E-02 | 1754.97  | not significant |
| 8210 | RABGEF1       | 1.08 | 8.12E-03 | 1.62E-02 | 2026.82  | not significant |
| 8211 | C1orf43       | 1.08 | 2.97E-03 | 6.50E-03 | 7677.25  | not significant |
| 8212 | THAP3         | 1.08 | 1.09E-01 | 1.64E-01 | 529.19   | not significant |
| 8213 | SDR39U1       | 1.08 | 2.74E-02 | 4.87E-02 | 1269.93  | not significant |
| 8214 | RNF41         | 1.08 | 1.45E-02 | 2.75E-02 | 1822.70  | not significant |
| 8215 | TCF3          | 1.08 | 2.69E-04 | 7.16E-04 | 12446.61 | not significant |
| 8216 | ZNF669        | 1.08 | 9.23E-02 | 1.42E-01 | 613.77   | not significant |
| 8217 | LUC7L         | 1.08 | 2.87E-02 | 5.07E-02 | 1801.06  | not significant |
| 8218 | TPO           | 1.08 | 1.81E-01 | 2.54E-01 | 320.16   | not significant |
| 8219 | CYP2U1        | 1.08 | 8.99E-02 | 1.39E-01 | 626.73   | not significant |
| 8220 | DIXDC1        | 1.08 | 3.26E-01 | 4.18E-01 | 30.23    | not significant |
| 8221 | FAXDC2        | 1.08 | 1.89E-01 | 2.63E-01 | 9.11     | not significant |
| 8222 | PEX10         | 1.08 | 1.03E-01 | 1.57E-01 | 585.45   | not significant |
| 8223 | EVI5L         | 1.08 | 6.10E-02 | 9.89E-02 | 840.94   | not significant |
| 8224 | TMEM164       | 1.08 | 7.66E-04 | 1.86E-03 | 5723.11  | not significant |
| 8225 | DHX35         | 1.08 | 2.74E-02 | 4.87E-02 | 1492.72  | not significant |
| 8226 | SMARCC1       | 1.08 | 3.49E-04 | 9.09E-04 | 15005.31 | not significant |
| 8227 | MYO9A         | 1.08 | 3.34E-02 | 5.81E-02 | 1193.83  | not significant |
| 8228 | TTC3P1        | 1.08 | 3.15E-01 | 4.06E-01 | 24.11    | not significant |
| 8229 | RPL22L1       | 1.08 | 3.94E-03 | 8.44E-03 | 3980.73  | not significant |
| 8230 | QSOX1         | 1.08 | 7.09E-02 | 1.13E-01 | 815.83   | not significant |
| 8231 | PTPN23        | 1.08 | 2.62E-02 | 4.67E-02 | 2312.37  | not significant |
| 8232 | ZNF766        | 1.08 | 3.02E-02 | 5.30E-02 | 1210.77  | not significant |
| 8233 | CGGBP1        | 1.08 | 9.63E-05 | 2.77E-04 | 10207.64 | not significant |
| 8234 | SLC25A38      | 1.08 | 2.06E-03 | 4.64E-03 | 3646.66  | not significant |
| 8235 | CTC-338M12.4  | 1.08 | 3.20E-01 | 4.11E-01 | 93.93    | not significant |
| 8236 | FLJ22184      | 1.08 | 2.26E-01 | 3.07E-01 | 11.31    | not significant |
| 8237 | DOCK4         | 1.08 | 3.30E-01 | 4.21E-01 | 30.68    | not significant |
| 8238 | ANKRD20A5P    | 1.08 | 3.15E-01 | 4.05E-01 | 108.72   | not significant |
| 8239 | DTX2P1-UPK3BP | 1.08 | 3.20E-01 | 4.11E-01 | 85.15    | not significant |
| 8240 | ZNF24         | 1.08 | 6.35E-04 | 1.57E-03 | 4761.20  | not significant |
| 8241 | ZNF510        | 1.08 | 6.78E-02 | 1.08E-01 | 729.94   | not significant |
| 8242 | SLC12A2       | 1.08 | 2.80E-02 | 4.96E-02 | 1264.92  | not significant |
| 8243 | RND1          | 1.08 | 3.39E-01 | 4.30E-01 | 44.59    | not significant |
| 8244 | MRPS2         | 1.08 | 1.80E-02 | 3.35E-02 | 1553.17  | not significant |
| 8245 | PHF13         | 1.08 | 2.10E-02 | 3.83E-02 | 1447.69  | not significant |
| 8246 | LOC101926996  | 1.08 | 1.92E-01 | 2.67E-01 | 9.78     | not significant |
| 8247 | RHOBTB2       | 1.08 | 2.68E-01 | 3.54E-01 | 160.01   | not significant |
| 8248 | TRAP          | 1.08 | 4.51E-02 | 7.58E-02 | 1045.30  | not significant |
| 8249 | TMEM27        | 1.08 | 1.95E-01 | 2.71E-01 | 10.48    | not significant |
| 8250 | GABARAPL2     | 1.08 | 9.53E-03 | 1.88E-02 | 1867.65  | not significant |
| 8251 | B4GALT4       | 1.08 | 1.37E-01 | 2.00E-01 | 450.80   | not significant |
| 8252 | LIPT1         | 1.08 | 2.07E-01 | 2.85E-01 | 251.32   | not significant |
| 8253 | ANP32AP1      | 1.08 | 2.88E-01 | 3.76E-01 | 19.84    | not significant |
| 8254 | ZNF76         | 1.08 | 8.07E-03 | 1.62E-02 | 2116.48  | not significant |
| 8255 | GALNT3        | 1.08 | 2.47E-01 | 3.30E-01 | 14.25    | not significant |
| 8256 | PSEN1         | 1.08 | 6.23E-03 | 1.28E-02 | 2147.61  | not significant |
| 8257 | SAT1          | 1.08 | 2.30E-02 | 4.17E-02 | 1283.94  | not significant |
| 8258 | ATE1          | 1.08 | 1.88E-02 | 3.48E-02 | 1487.98  | not significant |
| 8259 | USP18         | 1.08 | 1.05E-01 | 1.59E-01 | 548.25   | not significant |
| 8260 | SCN3A         | 1.08 | 3.29E-01 | 4.20E-01 | 76.84    | not significant |

|      |            |      |          |          |          |                 |
|------|------------|------|----------|----------|----------|-----------------|
| 8261 | TRIM37     | 1.08 | 2.36E-03 | 5.26E-03 | 2948.05  | not significant |
| 8262 | ITGB7      | 1.08 | 2.46E-01 | 3.29E-01 | 193.87   | not significant |
| 8263 | IL27RA     | 1.08 | 2.82E-02 | 4.99E-02 | 1670.41  | not significant |
| 8264 | TCHP       | 1.08 | 1.71E-02 | 3.18E-02 | 1814.62  | not significant |
| 8265 | MLLT6      | 1.08 | 5.19E-04 | 1.31E-03 | 7756.84  | not significant |
| 8266 | EIF1B-AS1  | 1.08 | 1.70E-01 | 2.41E-01 | 8.45     | not significant |
| 8267 | PPARA      | 1.08 | 2.51E-01 | 3.35E-01 | 187.95   | not significant |
| 8268 | ZNF81      | 1.08 | 2.27E-01 | 3.09E-01 | 13.68    | not significant |
| 8269 | BCKDHA     | 1.08 | 5.19E-02 | 8.59E-02 | 801.79   | not significant |
| 8270 | FAM171A2   | 1.08 | 2.56E-01 | 3.41E-01 | 204.75   | not significant |
| 8271 | CIB2       | 1.08 | 2.12E-01 | 2.91E-01 | 11.06    | not significant |
| 8272 | ZNF235     | 1.08 | 2.63E-01 | 3.48E-01 | 164.57   | not significant |
| 8273 | GPR83      | 1.08 | 2.56E-01 | 3.41E-01 | 16.22    | not significant |
| 8274 | TSC1       | 1.08 | 5.93E-02 | 9.66E-02 | 928.05   | not significant |
| 8275 | ZBED4      | 1.08 | 1.69E-04 | 4.66E-04 | 7242.79  | not significant |
| 8276 | NCKAP1L    | 1.08 | 1.20E-04 | 3.39E-04 | 7421.64  | not significant |
| 8277 | IQCC       | 1.08 | 1.32E-01 | 1.95E-01 | 423.61   | not significant |
| 8278 | MYO5A      | 1.08 | 1.87E-02 | 3.45E-02 | 1687.85  | not significant |
| 8279 | ZNF569     | 1.08 | 6.40E-02 | 1.03E-01 | 868.49   | not significant |
| 8280 | CCT6P3     | 1.08 | 3.03E-01 | 3.92E-01 | 130.98   | not significant |
| 8281 | AFF1       | 1.08 | 2.26E-03 | 5.05E-03 | 5043.23  | not significant |
| 8282 | CAMK1D     | 1.08 | 8.04E-02 | 1.26E-01 | 679.01   | not significant |
| 8283 | COMMD4     | 1.08 | 3.70E-02 | 6.35E-02 | 949.22   | not significant |
| 8284 | HMG20B     | 1.08 | 1.17E-02 | 2.26E-02 | 2049.91  | not significant |
| 8285 | COPS2      | 1.08 | 5.44E-03 | 1.13E-02 | 2143.72  | not significant |
| 8286 | RNF170     | 1.08 | 6.78E-02 | 1.08E-01 | 773.46   | not significant |
| 8287 | FICD       | 1.08 | 3.24E-01 | 4.15E-01 | 74.71    | not significant |
| 8288 | SLC22A23   | 1.08 | 1.58E-01 | 2.27E-01 | 350.18   | not significant |
| 8289 | ECSIT      | 1.08 | 4.59E-02 | 7.70E-02 | 963.14   | not significant |
| 8290 | RTCA-AS1   | 1.08 | 2.77E-01 | 3.64E-01 | 20.00    | not significant |
| 8291 | USP19      | 1.08 | 1.66E-03 | 3.82E-03 | 2986.09  | not significant |
| 8292 | UHMK1      | 1.08 | 2.14E-03 | 4.81E-03 | 7940.95  | not significant |
| 8293 | ACOX1      | 1.08 | 1.87E-03 | 4.24E-03 | 3201.65  | not significant |
| 8294 | MYPOP      | 1.08 | 9.73E-02 | 1.49E-01 | 529.96   | not significant |
| 8295 | TMC8       | 1.08 | 4.32E-03 | 9.17E-03 | 5717.42  | not significant |
| 8296 | ANAPC2     | 1.08 | 8.21E-02 | 1.28E-01 | 980.26   | not significant |
| 8297 | KAT2A      | 1.08 | 1.36E-02 | 2.59E-02 | 1563.87  | not significant |
| 8298 | CLTA       | 1.08 | 1.17E-03 | 2.77E-03 | 4539.54  | not significant |
| 8299 | ACTA1      | 1.08 | 1.94E-01 | 2.70E-01 | 9.83     | not significant |
| 8300 | DCP1A      | 1.08 | 1.53E-01 | 2.21E-01 | 340.49   | not significant |
| 8301 | FOXD2      | 1.08 | 2.92E-01 | 3.81E-01 | 29.07    | not significant |
| 8302 | ATP10A     | 1.08 | 5.58E-02 | 9.15E-02 | 765.61   | not significant |
| 8303 | MCM8       | 1.08 | 1.36E-03 | 3.18E-03 | 4713.08  | not significant |
| 8304 | ZNF460     | 1.08 | 2.85E-01 | 3.73E-01 | 119.28   | not significant |
| 8305 | PEX5       | 1.08 | 8.17E-03 | 1.63E-02 | 2295.25  | not significant |
| 8306 | DOCK7      | 1.08 | 4.07E-02 | 6.91E-02 | 1214.72  | not significant |
| 8307 | ZMYND11    | 1.08 | 1.87E-03 | 4.24E-03 | 2850.53  | not significant |
| 8308 | ADAM10     | 1.08 | 1.17E-03 | 2.76E-03 | 5107.70  | not significant |
| 8309 | STX18      | 1.08 | 3.59E-02 | 6.18E-02 | 986.40   | not significant |
| 8310 | LRRC23     | 1.08 | 3.21E-01 | 4.12E-01 | 39.09    | not significant |
| 8311 | PIK3C3     | 1.08 | 2.83E-02 | 5.02E-02 | 1055.88  | not significant |
| 8312 | ZBTB37     | 1.08 | 2.91E-01 | 3.80E-01 | 122.66   | not significant |
| 8313 | CPNE3      | 1.08 | 2.24E-04 | 6.06E-04 | 5460.28  | not significant |
| 8314 | LOC644656  | 1.08 | 3.24E-01 | 4.15E-01 | 44.62    | not significant |
| 8315 | CPD        | 1.08 | 1.40E-03 | 3.26E-03 | 3178.45  | not significant |
| 8316 | MFSD1      | 1.08 | 3.63E-02 | 6.24E-02 | 1003.66  | not significant |
| 8317 | ANKRD13D   | 1.08 | 1.41E-02 | 2.68E-02 | 1842.96  | not significant |
| 8318 | FBXO3      | 1.08 | 1.34E-01 | 1.97E-01 | 398.51   | not significant |
| 8319 | MAFB       | 1.08 | 3.00E-01 | 3.89E-01 | 26.13    | not significant |
| 8320 | FZD2       | 1.08 | 1.75E-01 | 2.47E-01 | 295.58   | not significant |
| 8321 | ITM2B      | 1.08 | 8.11E-05 | 2.36E-04 | 16675.85 | not significant |
| 8322 | PLEKHA7    | 1.08 | 3.08E-01 | 3.98E-01 | 108.69   | not significant |
| 8323 | SLA        | 1.08 | 5.97E-03 | 1.23E-02 | 1976.87  | not significant |
| 8324 | CEP95      | 1.08 | 3.93E-02 | 6.71E-02 | 1162.70  | not significant |
| 8325 | LRPPRC     | 1.08 | 1.25E-05 | 4.10E-05 | 13138.94 | not significant |
| 8326 | TRAPPC2P1  | 1.08 | 2.80E-01 | 3.68E-01 | 156.29   | not significant |
| 8327 | TSC22D2    | 1.08 | 7.46E-02 | 1.18E-01 | 621.96   | not significant |
| 8328 | ZFAND5     | 1.08 | 3.04E-03 | 6.64E-03 | 2697.59  | not significant |
| 8329 | PAXBP1-AS1 | 1.08 | 3.10E-01 | 4.00E-01 | 30.97    | not significant |
| 8330 | REEP5      | 1.08 | 1.15E-02 | 2.23E-02 | 1547.70  | not significant |
| 8331 | VPS4B      | 1.08 | 1.54E-03 | 3.57E-03 | 4303.45  | not significant |
| 8332 | LENG1      | 1.08 | 2.90E-01 | 3.78E-01 | 104.35   | not significant |
| 8333 | SNAPC4     | 1.08 | 8.17E-02 | 1.28E-01 | 633.56   | not significant |
| 8334 | NCOA3      | 1.08 | 4.66E-03 | 9.85E-03 | 2051.76  | not significant |
| 8335 | PGD        | 1.08 | 7.64E-05 | 2.23E-04 | 10859.00 | not significant |
| 8336 | TEX12      | 1.08 | 1.74E-01 | 2.47E-01 | 9.87     | not significant |
| 8337 | TARP       | 1.08 | 7.86E-02 | 1.24E-01 | 707.28   | not significant |
| 8338 | PHLDA1     | 1.08 | 3.01E-01 | 3.90E-01 | 29.54    | not significant |
| 8339 | AUTS2      | 1.08 | 3.14E-01 | 4.05E-01 | 71.73    | not significant |
| 8340 | TINF2      | 1.08 | 1.98E-03 | 4.48E-03 | 2776.82  | not significant |
| 8341 | EIF2AK3    | 1.08 | 2.06E-02 | 3.77E-02 | 1556.70  | not significant |
| 8342 | HIPK2      | 1.08 | 3.96E-03 | 8.48E-03 | 3947.91  | not significant |
| 8343 | APOL2      | 1.08 | 7.84E-03 | 1.58E-02 | 1872.76  | not significant |
| 8344 | ZBTB18     | 1.08 | 1.44E-02 | 2.73E-02 | 1410.53  | not significant |
| 8345 | TPM4       | 1.08 | 6.41E-05 | 1.90E-04 | 10244.62 | not significant |
| 8346 | C21orf2    | 1.08 | 1.23E-01 | 1.82E-01 | 410.24   | not significant |
| 8347 | DMWD       | 1.08 | 3.53E-02 | 6.09E-02 | 889.55   | not significant |
| 8348 | GIMAP5     | 1.08 | 2.94E-01 | 3.82E-01 | 26.94    | not significant |

|      |            |      |          |          |          |                 |
|------|------------|------|----------|----------|----------|-----------------|
| 8349 | ADAM22     | 1.08 | 6.38E-03 | 1.31E-02 | 2106.75  | not significant |
| 8350 | PRKX       | 1.08 | 3.48E-03 | 7.53E-03 | 2567.18  | not significant |
| 8351 | NMNAT3     | 1.08 | 2.93E-01 | 3.82E-01 | 25.34    | not significant |
| 8352 | PITPNM1    | 1.08 | 1.29E-03 | 3.03E-03 | 3412.51  | not significant |
| 8353 | CLHC1      | 1.08 | 1.95E-01 | 2.71E-01 | 246.41   | not significant |
| 8354 | TUBG2      | 1.08 | 1.77E-01 | 2.50E-01 | 291.45   | not significant |
| 8355 | SLC9C1     | 1.08 | 2.10E-01 | 2.89E-01 | 12.21    | not significant |
| 8356 | MBD5       | 1.08 | 1.42E-01 | 2.07E-01 | 342.01   | not significant |
| 8357 | RCE1       | 1.08 | 5.59E-02 | 9.17E-02 | 742.98   | not significant |
| 8358 | MEF2D      | 1.08 | 7.03E-03 | 1.43E-02 | 1809.00  | not significant |
| 8359 | NR4A1      | 1.08 | 1.48E-01 | 2.15E-01 | 7.70     | not significant |
| 8360 | PIAS4      | 1.08 | 3.37E-02 | 5.85E-02 | 929.80   | not significant |
| 8361 | UBL7       | 1.08 | 1.58E-02 | 2.96E-02 | 1601.33  | not significant |
| 8362 | HARS2      | 1.08 | 2.90E-02 | 5.13E-02 | 1010.55  | not significant |
| 8363 | LINC00563  | 1.08 | 2.98E-01 | 3.87E-01 | 89.67    | not significant |
| 8364 | ASH1L-AS1  | 1.08 | 3.15E-01 | 4.05E-01 | 51.63    | not significant |
| 8365 | DDOST      | 1.08 | 5.07E-04 | 1.28E-03 | 6758.98  | not significant |
| 8366 | ADNP-AS1   | 1.08 | 2.84E-01 | 3.72E-01 | 23.75    | not significant |
| 8367 | ZNF236     | 1.08 | 2.35E-02 | 4.24E-02 | 1339.62  | not significant |
| 8368 | RRM1       | 1.08 | 1.53E-05 | 4.96E-05 | 15343.56 | not significant |
| 8369 | ZDHHC23    | 1.08 | 1.28E-01 | 1.89E-01 | 409.64   | not significant |
| 8370 | YIPF6      | 1.08 | 6.20E-02 | 1.00E-01 | 685.15   | not significant |
| 8371 | TRIM8      | 1.09 | 3.43E-02 | 5.95E-02 | 973.72   | not significant |
| 8372 | ENOX2      | 1.09 | 8.53E-02 | 1.33E-01 | 776.07   | not significant |
| 8373 | PLSCR1     | 1.09 | 1.87E-02 | 3.46E-02 | 1308.80  | not significant |
| 8374 | EFCAB14    | 1.09 | 4.85E-04 | 1.23E-03 | 5403.33  | not significant |
| 8375 | IFITM10    | 1.09 | 3.08E-01 | 3.98E-01 | 37.17    | not significant |
| 8376 | TULP3      | 1.09 | 5.68E-02 | 9.29E-02 | 673.75   | not significant |
| 8377 | DUSP28     | 1.09 | 2.41E-01 | 3.23E-01 | 156.06   | not significant |
| 8378 | SERTAD2    | 1.09 | 1.14E-02 | 2.22E-02 | 1553.87  | not significant |
| 8379 | TMEM110    | 1.09 | 1.55E-02 | 2.90E-02 | 1265.09  | not significant |
| 8380 | COL11A2    | 1.09 | 2.81E-01 | 3.68E-01 | 24.12    | not significant |
| 8381 | PDF        | 1.09 | 2.35E-01 | 3.17E-01 | 188.65   | not significant |
| 8382 | C1RL-AS1   | 1.09 | 1.87E-01 | 2.61E-01 | 306.83   | not significant |
| 8383 | TOP3A      | 1.09 | 9.44E-04 | 2.27E-03 | 3381.95  | not significant |
| 8384 | DYNLL1-AS1 | 1.09 | 2.84E-01 | 3.72E-01 | 104.59   | not significant |
| 8385 | E2F2       | 1.09 | 1.39E-04 | 3.88E-04 | 5436.28  | not significant |
| 8386 | HERPUD2    | 1.09 | 1.16E-02 | 2.25E-02 | 1432.94  | not significant |
| 8387 | MRPS31P5   | 1.09 | 9.38E-02 | 1.44E-01 | 474.64   | not significant |
| 8388 | SERP1      | 1.09 | 3.17E-05 | 9.83E-05 | 10138.33 | not significant |
| 8389 | TMEM222    | 1.09 | 1.61E-02 | 3.02E-02 | 1218.24  | not significant |
| 8390 | BOLA1      | 1.09 | 2.87E-01 | 3.75E-01 | 27.93    | not significant |
| 8391 | TJP2       | 1.09 | 5.62E-02 | 9.20E-02 | 671.40   | not significant |
| 8392 | DUSP16     | 1.09 | 2.03E-01 | 2.80E-01 | 208.24   | not significant |
| 8393 | ZNF791     | 1.09 | 1.42E-01 | 2.07E-01 | 355.97   | not significant |
| 8394 | RNF114     | 1.09 | 2.77E-04 | 7.34E-04 | 4584.91  | not significant |
| 8395 | LOC439994  | 1.09 | 3.05E-01 | 3.94E-01 | 63.71    | not significant |
| 8396 | NOD1       | 1.09 | 1.86E-02 | 3.44E-02 | 1141.45  | not significant |
| 8397 | TMEM248    | 1.09 | 1.02E-04 | 2.92E-04 | 6327.49  | not significant |
| 8398 | RSF1       | 1.09 | 2.04E-02 | 3.73E-02 | 1502.74  | not significant |
| 8399 | NME6       | 1.09 | 7.16E-02 | 1.14E-01 | 610.43   | not significant |
| 8400 | RUNX2      | 1.09 | 7.96E-03 | 1.60E-02 | 2583.26  | not significant |
| 8401 | ZNF14      | 1.09 | 1.44E-01 | 2.09E-01 | 333.59   | not significant |
| 8402 | CDC25B     | 1.09 | 6.58E-05 | 1.95E-04 | 13657.80 | not significant |
| 8403 | OLA1       | 1.09 | 1.37E-03 | 3.21E-03 | 5201.93  | not significant |
| 8404 | ANXA11     | 1.09 | 6.65E-04 | 1.64E-03 | 3812.35  | not significant |
| 8405 | SMPD3      | 1.09 | 3.07E-01 | 3.97E-01 | 50.95    | not significant |
| 8406 | PPM1N      | 1.09 | 1.82E-01 | 2.55E-01 | 11.22    | not significant |
| 8407 | WDR27      | 1.09 | 1.33E-01 | 1.95E-01 | 457.04   | not significant |
| 8408 | HSPA13     | 1.09 | 7.56E-04 | 1.84E-03 | 3246.30  | not significant |
| 8409 | TMEM38B    | 1.09 | 5.17E-02 | 8.55E-02 | 888.69   | not significant |
| 8410 | C7orf26    | 1.09 | 4.32E-03 | 9.17E-03 | 1849.17  | not significant |
| 8411 | SMYD3      | 1.09 | 4.46E-02 | 7.50E-02 | 1035.18  | not significant |
| 8412 | ATG4B      | 1.09 | 1.51E-03 | 3.49E-03 | 2691.57  | not significant |
| 8413 | BEND3      | 1.09 | 2.02E-01 | 2.79E-01 | 12.31    | not significant |
| 8414 | SRSF5      | 1.09 | 2.90E-05 | 9.03E-05 | 11915.69 | not significant |
| 8415 | LPP-AS2    | 1.09 | 3.00E-01 | 3.89E-01 | 75.68    | not significant |
| 8416 | CHM        | 1.09 | 2.97E-02 | 5.24E-02 | 878.80   | not significant |
| 8417 | ZNF77      | 1.09 | 1.82E-01 | 2.55E-01 | 234.41   | not significant |
| 8418 | SEMA4F     | 1.09 | 1.87E-01 | 2.62E-01 | 255.67   | not significant |
| 8419 | TCN2       | 1.09 | 2.26E-01 | 3.07E-01 | 16.36    | not significant |
| 8420 | ATN1       | 1.09 | 8.21E-02 | 1.28E-01 | 522.48   | not significant |
| 8421 | COG4       | 1.09 | 1.79E-02 | 3.32E-02 | 1301.59  | not significant |
| 8422 | TMOD2      | 1.09 | 4.34E-02 | 7.33E-02 | 944.15   | not significant |
| 8423 | NR3C1      | 1.09 | 2.37E-03 | 5.28E-03 | 2291.90  | not significant |
| 8424 | RBM28      | 1.09 | 8.86E-03 | 1.76E-02 | 1551.05  | not significant |
| 8425 | ATP2C1     | 1.09 | 6.04E-04 | 1.50E-03 | 3754.09  | not significant |
| 8426 | RPL12      | 1.09 | 3.35E-04 | 8.78E-04 | 16360.10 | not significant |
| 8427 | SAMHD1     | 1.09 | 2.98E-01 | 3.87E-01 | 37.34    | not significant |
| 8428 | SLC35E1    | 1.09 | 1.16E-03 | 2.75E-03 | 2712.91  | not significant |
| 8429 | GAS6-AS1   | 1.09 | 3.02E-01 | 3.91E-01 | 50.43    | not significant |
| 8430 | CAPS2      | 1.09 | 2.39E-01 | 3.21E-01 | 149.25   | not significant |
| 8431 | NELFA      | 1.09 | 1.44E-02 | 2.73E-02 | 1659.97  | not significant |
| 8432 | POLD4      | 1.09 | 4.87E-02 | 8.13E-02 | 679.38   | not significant |
| 8433 | PIK3C2A    | 1.09 | 4.50E-02 | 7.57E-02 | 1012.72  | not significant |
| 8434 | KRI1       | 1.09 | 1.48E-03 | 3.44E-03 | 2788.67  | not significant |
| 8435 | TRIM16L    | 1.09 | 2.99E-01 | 3.88E-01 | 51.74    | not significant |
| 8436 | TPRN       | 1.09 | 6.05E-02 | 9.82E-02 | 603.94   | not significant |



|      |              |      |          |          |          |                 |
|------|--------------|------|----------|----------|----------|-----------------|
| 8437 | SLC35A5      | 1.09 | 8.00E-03 | 1.60E-02 | 1627.05  | not significant |
| 8438 | LINC00920    | 1.09 | 2.55E-01 | 3.40E-01 | 119.72   | not significant |
| 8439 | NSMCE2       | 1.09 | 3.37E-02 | 5.85E-02 | 984.70   | not significant |
| 8440 | AOX2P        | 1.09 | 1.81E-01 | 2.54E-01 | 11.74    | not significant |
| 8441 | ZNF614       | 1.09 | 1.51E-02 | 2.84E-02 | 1229.45  | not significant |
| 8442 | MCM5         | 1.09 | 9.08E-06 | 3.03E-05 | 12071.86 | not significant |
| 8443 | NSA2         | 1.09 | 8.85E-04 | 2.14E-03 | 3806.84  | not significant |
| 8444 | GUSBP9       | 1.09 | 2.96E-01 | 3.85E-01 | 48.76    | not significant |
| 8445 | MYL6B        | 1.09 | 3.47E-03 | 7.50E-03 | 3601.59  | not significant |
| 8446 | LLGL1        | 1.09 | 5.14E-03 | 1.08E-02 | 2220.92  | not significant |
| 8447 | FAM134C      | 1.09 | 8.58E-03 | 1.71E-02 | 1666.72  | not significant |
| 8448 | PLCXD2       | 1.09 | 2.97E-01 | 3.86E-01 | 59.27    | not significant |
| 8449 | ZNF408       | 1.09 | 1.08E-01 | 1.63E-01 | 392.26   | not significant |
| 8450 | SUDS3        | 1.09 | 4.87E-04 | 1.24E-03 | 3451.43  | not significant |
| 8451 | DIRC2        | 1.09 | 2.24E-01 | 3.05E-01 | 156.21   | not significant |
| 8452 | CLCC1        | 1.09 | 1.17E-01 | 1.74E-01 | 367.58   | not significant |
| 8453 | MRPS36       | 1.09 | 1.17E-01 | 1.75E-01 | 378.73   | not significant |
| 8454 | LOC100287944 | 1.09 | 1.65E-01 | 2.36E-01 | 10.77    | not significant |
| 8455 | PTPRD        | 1.09 | 2.87E-01 | 3.75E-01 | 34.20    | not significant |
| 8456 | AKAP5        | 1.09 | 1.05E-01 | 1.60E-01 | 417.30   | not significant |
| 8457 | SEMA7A       | 1.09 | 2.89E-03 | 6.34E-03 | 2034.03  | not significant |
| 8458 | DRICH1       | 1.09 | 2.53E-01 | 3.38E-01 | 21.68    | not significant |
| 8459 | NEDD9        | 1.09 | 2.38E-02 | 4.30E-02 | 937.67   | not significant |
| 8460 | VAV2         | 1.09 | 1.83E-01 | 2.56E-01 | 11.23    | not significant |
| 8461 | CTAGE5       | 1.09 | 2.26E-02 | 4.09E-02 | 1099.59  | not significant |
| 8462 | ZNF26        | 1.09 | 2.90E-01 | 3.78E-01 | 61.76    | not significant |
| 8463 | LRFN4        | 1.09 | 9.34E-03 | 1.85E-02 | 1618.71  | not significant |
| 8464 | CDK20        | 1.09 | 2.94E-01 | 3.83E-01 | 48.12    | not significant |
| 8465 | AP1AR        | 1.09 | 8.32E-03 | 1.66E-02 | 1413.73  | not significant |
| 8466 | WHAMMP1      | 1.09 | 2.85E-01 | 3.74E-01 | 90.98    | not significant |
| 8467 | TSPAN31      | 1.09 | 1.16E-01 | 1.73E-01 | 423.72   | not significant |
| 8468 | MRPL15       | 1.09 | 1.24E-02 | 2.39E-02 | 2365.08  | not significant |
| 8469 | RXR8         | 1.09 | 1.10E-01 | 1.65E-01 | 381.65   | not significant |
| 8470 | BTBD6        | 1.09 | 1.34E-02 | 2.56E-02 | 1156.39  | not significant |
| 8471 | GRAMD4       | 1.09 | 1.73E-04 | 4.78E-04 | 5952.61  | not significant |
| 8472 | SHMT1        | 1.09 | 3.85E-03 | 8.27E-03 | 1845.99  | not significant |
| 8473 | HOXC4        | 1.09 | 1.53E-01 | 2.20E-01 | 282.31   | not significant |
| 8474 | MTBP         | 1.09 | 1.19E-02 | 2.30E-02 | 1281.10  | not significant |
| 8475 | TOE1         | 1.09 | 6.16E-03 | 1.27E-02 | 1554.43  | not significant |
| 8476 | MIS18A       | 1.09 | 4.90E-03 | 1.03E-02 | 1774.00  | not significant |
| 8477 | GCC2         | 1.09 | 5.99E-03 | 1.23E-02 | 1580.40  | not significant |
| 8478 | GATA3-AS1    | 1.09 | 2.18E-01 | 2.97E-01 | 16.43    | not significant |
| 8479 | LOC256880    | 1.09 | 2.73E-01 | 3.59E-01 | 27.69    | not significant |
| 8480 | SSH2         | 1.09 | 5.74E-04 | 1.44E-03 | 3330.90  | not significant |
| 8481 | LOC102723701 | 1.09 | 2.62E-01 | 3.48E-01 | 27.71    | not significant |
| 8482 | TMEM184A     | 1.09 | 1.82E-01 | 2.55E-01 | 12.72    | not significant |
| 8483 | RNF149       | 1.09 | 5.01E-03 | 1.05E-02 | 1700.61  | not significant |
| 8484 | RAD9A        | 1.09 | 7.38E-03 | 1.49E-02 | 1715.52  | not significant |
| 8485 | LOC100129931 | 1.09 | 1.76E-01 | 2.49E-01 | 12.03    | not significant |
| 8486 | ZMYM3        | 1.09 | 2.33E-03 | 5.19E-03 | 3478.53  | not significant |
| 8487 | ZNF44        | 1.09 | 1.07E-01 | 1.62E-01 | 387.08   | not significant |
| 8488 | ZNF674-AS1   | 1.09 | 2.19E-01 | 2.99E-01 | 161.40   | not significant |
| 8489 | LCAT         | 1.09 | 2.69E-01 | 3.55E-01 | 104.60   | not significant |
| 8490 | H1FO         | 1.09 | 2.39E-01 | 3.22E-01 | 130.33   | not significant |
| 8491 | CELSR3       | 1.09 | 6.25E-03 | 1.28E-02 | 2229.50  | not significant |
| 8492 | METTL14      | 1.09 | 1.40E-02 | 2.66E-02 | 1116.01  | not significant |
| 8493 | CC2D1B       | 1.09 | 9.84E-03 | 1.93E-02 | 1324.83  | not significant |
| 8494 | SLC9A7       | 1.09 | 9.67E-02 | 1.48E-01 | 396.74   | not significant |
| 8495 | C1orf86      | 1.09 | 1.43E-02 | 2.71E-02 | 1514.10  | not significant |
| 8496 | SBNO2        | 1.09 | 1.44E-02 | 2.73E-02 | 1733.19  | not significant |
| 8497 | CDK10        | 1.09 | 8.59E-03 | 1.71E-02 | 1466.09  | not significant |
| 8498 | TMX4         | 1.09 | 1.85E-01 | 2.59E-01 | 205.27   | not significant |
| 8499 | SSR4         | 1.09 | 1.41E-03 | 3.29E-03 | 2462.60  | not significant |
| 8500 | IGHMBP2      | 1.09 | 2.82E-02 | 5.00E-02 | 873.01   | not significant |
| 8501 | NR2C2        | 1.09 | 4.06E-04 | 1.05E-03 | 4002.40  | not significant |
| 8502 | PYGB         | 1.09 | 3.13E-03 | 6.84E-03 | 1882.03  | not significant |
| 8503 | CAMSAP1      | 1.09 | 1.58E-03 | 3.64E-03 | 2335.67  | not significant |
| 8504 | ORAI2        | 1.09 | 1.24E-03 | 2.92E-03 | 3749.77  | not significant |
| 8505 | PPM1D        | 1.09 | 5.04E-03 | 1.06E-02 | 1645.43  | not significant |
| 8506 | NNT-AS1      | 1.09 | 3.94E-02 | 6.72E-02 | 698.50   | not significant |
| 8507 | RNF216       | 1.09 | 7.93E-04 | 1.93E-03 | 3353.97  | not significant |
| 8508 | RASA4        | 1.09 | 2.47E-01 | 3.30E-01 | 21.40    | not significant |
| 8509 | KDM3B        | 1.09 | 5.32E-04 | 1.34E-03 | 5021.84  | not significant |
| 8510 | SPATA7       | 1.09 | 2.00E-01 | 2.77E-01 | 187.45   | not significant |
| 8511 | DOCK11       | 1.09 | 8.53E-04 | 2.06E-03 | 2543.74  | not significant |
| 8512 | RAPH1        | 1.09 | 1.14E-01 | 1.71E-01 | 413.48   | not significant |
| 8513 | SIN3A        | 1.09 | 2.54E-05 | 7.97E-05 | 5236.73  | not significant |
| 8514 | GMIP         | 1.09 | 3.14E-02 | 5.50E-02 | 896.42   | not significant |
| 8515 | TBC1D24      | 1.09 | 4.39E-02 | 7.41E-02 | 753.25   | not significant |
| 8516 | NFX1         | 1.09 | 1.42E-03 | 3.30E-03 | 2438.66  | not significant |
| 8517 | RNF220       | 1.09 | 1.72E-03 | 3.93E-03 | 2996.36  | not significant |
| 8518 | CYBRD1       | 1.09 | 7.95E-02 | 1.25E-01 | 444.09   | not significant |
| 8519 | TBC1D10A     | 1.09 | 5.92E-03 | 1.22E-02 | 1559.80  | not significant |
| 8520 | ING5         | 1.09 | 1.72E-03 | 3.92E-03 | 2099.81  | not significant |
| 8521 | SYTL1        | 1.09 | 5.45E-02 | 8.98E-02 | 757.29   | not significant |
| 8522 | TMEM181      | 1.09 | 6.33E-03 | 1.30E-02 | 1734.08  | not significant |
| 8523 | ZNF160       | 1.09 | 1.51E-02 | 2.84E-02 | 1242.82  | not significant |
| 8524 | MYSM1        | 1.09 | 1.29E-01 | 1.90E-01 | 1960.62  | not significant |

|      |              |      |          |          |          |                 |
|------|--------------|------|----------|----------|----------|-----------------|
| 8525 | DTNB         | 1.09 | 6.64E-02 | 1.07E-01 | 517.55   | not significant |
| 8526 | LINC01341    | 1.09 | 1.52E-01 | 2.20E-01 | 9.79     | not significant |
| 8527 | CERS6        | 1.09 | 4.23E-05 | 1.29E-04 | 6759.74  | not significant |
| 8528 | SCYL2        | 1.09 | 4.50E-04 | 1.15E-03 | 3213.89  | not significant |
| 8529 | ZNF551       | 1.09 | 1.27E-02 | 2.43E-02 | 1132.03  | not significant |
| 8530 | ZNF570       | 1.09 | 1.97E-01 | 2.74E-01 | 185.05   | not significant |
| 8531 | UXT-AS1      | 1.09 | 1.95E-01 | 2.71E-01 | 13.86    | not significant |
| 8532 | TTY10        | 1.09 | 1.50E-01 | 2.17E-01 | 9.61     | not significant |
| 8533 | SLC45A4      | 1.09 | 1.73E-03 | 3.96E-03 | 2072.07  | not significant |
| 8534 | UNK          | 1.09 | 3.50E-04 | 9.11E-04 | 3772.72  | not significant |
| 8535 | VEZT         | 1.09 | 2.84E-04 | 7.52E-04 | 4303.39  | not significant |
| 8536 | IGF2R        | 1.09 | 7.62E-02 | 1.20E-01 | 8735.32  | not significant |
| 8537 | RARA-AS1     | 1.09 | 1.70E-01 | 2.41E-01 | 13.27    | not significant |
| 8538 | B4GALT1      | 1.09 | 4.77E-03 | 1.01E-02 | 1489.54  | not significant |
| 8539 | THAP6        | 1.09 | 9.95E-02 | 1.52E-01 | 379.20   | not significant |
| 8540 | BRPF1        | 1.09 | 1.31E-03 | 3.06E-03 | 2364.76  | not significant |
| 8541 | ZC3H3        | 1.09 | 1.22E-02 | 2.35E-02 | 1436.57  | not significant |
| 8542 | LOC100130872 | 1.09 | 2.77E-02 | 4.92E-02 | 955.24   | not significant |
| 8543 | LRFN3        | 1.09 | 5.42E-02 | 8.93E-02 | 566.67   | not significant |
| 8544 | ZAP70        | 1.09 | 2.73E-04 | 7.25E-04 | 9588.48  | not significant |
| 8545 | MINK1        | 1.09 | 1.30E-02 | 2.49E-02 | 1642.82  | not significant |
| 8546 | DMTF1        | 1.09 | 1.45E-01 | 2.10E-01 | 3049.60  | not significant |
| 8547 | KIF15        | 1.09 | 2.09E-05 | 6.63E-05 | 7090.76  | not significant |
| 8548 | MON2         | 1.09 | 1.16E-01 | 1.74E-01 | 2556.07  | not significant |
| 8549 | LRP12        | 1.09 | 1.86E-02 | 3.44E-02 | 1051.06  | not significant |
| 8550 | FMR1         | 1.09 | 6.54E-02 | 1.05E-01 | 513.04   | not significant |
| 8551 | RIC8B        | 1.09 | 1.41E-02 | 2.69E-02 | 1194.47  | not significant |
| 8552 | LCORL        | 1.09 | 3.47E-02 | 6.01E-02 | 686.64   | not significant |
| 8553 | UBXN4        | 1.09 | 1.52E-05 | 4.93E-05 | 8094.53  | not significant |
| 8554 | TSEN34       | 1.09 | 2.05E-01 | 2.82E-01 | 156.65   | not significant |
| 8555 | CASP2        | 1.09 | 4.26E-05 | 1.30E-04 | 7687.91  | not significant |
| 8556 | WDR64        | 1.09 | 2.56E-01 | 3.40E-01 | 28.05    | not significant |
| 8557 | FAM60A       | 1.09 | 1.21E-04 | 3.42E-04 | 4748.09  | not significant |
| 8558 | IPCEF1       | 1.09 | 3.43E-02 | 5.95E-02 | 806.11   | not significant |
| 8559 | NSMCE4A      | 1.09 | 3.98E-03 | 8.53E-03 | 1733.18  | not significant |
| 8560 | ZNF674       | 1.09 | 2.41E-01 | 3.23E-01 | 120.27   | not significant |
| 8561 | RERE         | 1.09 | 2.14E-02 | 3.90E-02 | 1463.32  | not significant |
| 8562 | TTC37        | 1.09 | 1.23E-04 | 3.47E-04 | 4112.14  | not significant |
| 8563 | ABHD4        | 1.09 | 2.28E-01 | 3.10E-01 | 135.38   | not significant |
| 8564 | PHTF1        | 1.09 | 2.53E-01 | 3.37E-01 | 92.45    | not significant |
| 8565 | LOC100996579 | 1.09 | 4.07E-02 | 6.90E-02 | 636.17   | not significant |
| 8566 | CARHSP1      | 1.09 | 1.58E-04 | 4.40E-04 | 7439.12  | not significant |
| 8567 | C14orf79     | 1.09 | 2.00E-01 | 2.77E-01 | 16.48    | not significant |
| 8568 | PAXIP1OS     | 1.09 | 1.04E-01 | 1.58E-01 | 404.43   | not significant |
| 8569 | ZNF589       | 1.09 | 3.55E-02 | 6.12E-02 | 791.99   | not significant |
| 8570 | PDIK1L       | 1.10 | 6.97E-03 | 1.42E-02 | 1567.44  | not significant |
| 8571 | RCHY1        | 1.10 | 8.46E-03 | 1.69E-02 | 1391.61  | not significant |
| 8572 | PITHD1       | 1.10 | 2.21E-03 | 4.95E-03 | 2158.38  | not significant |
| 8573 | DPH7         | 1.10 | 2.54E-02 | 4.54E-02 | 814.70   | not significant |
| 8574 | JAK2         | 1.10 | 2.49E-02 | 4.46E-02 | 854.09   | not significant |
| 8575 | CFLAR        | 1.10 | 1.40E-02 | 2.67E-02 | 1158.14  | not significant |
| 8576 | ATXN2        | 1.10 | 9.49E-03 | 1.87E-02 | 1745.69  | not significant |
| 8577 | BRD7         | 1.10 | 6.06E-04 | 1.51E-03 | 3757.96  | not significant |
| 8578 | ARAP2        | 1.10 | 7.32E-03 | 1.48E-02 | 1323.07  | not significant |
| 8579 | STX7         | 1.10 | 3.66E-02 | 6.29E-02 | 671.21   | not significant |
| 8580 | ZNF530       | 1.10 | 7.70E-02 | 1.21E-01 | 435.09   | not significant |
| 8581 | C1GALT1      | 1.10 | 4.23E-04 | 1.09E-03 | 2766.83  | not significant |
| 8582 | PLAA         | 1.10 | 3.45E-03 | 7.48E-03 | 1834.78  | not significant |
| 8583 | MEF2A        | 1.10 | 4.10E-04 | 1.06E-03 | 3368.09  | not significant |
| 8584 | MBD6         | 1.10 | 9.10E-03 | 1.80E-02 | 2403.69  | not significant |
| 8585 | CD2BP2       | 1.10 | 6.73E-04 | 1.66E-03 | 3153.38  | not significant |
| 8586 | TRAM1L1      | 1.10 | 2.66E-01 | 3.52E-01 | 43.62    | not significant |
| 8587 | JPX          | 1.10 | 2.13E-01 | 2.92E-01 | 142.31   | not significant |
| 8588 | RAB11B-AS1   | 1.10 | 2.15E-01 | 2.94E-01 | 133.70   | not significant |
| 8589 | ACTR8        | 1.10 | 1.21E-02 | 2.34E-02 | 1114.28  | not significant |
| 8590 | STK38L       | 1.10 | 6.77E-04 | 1.67E-03 | 2266.32  | not significant |
| 8591 | COMMDD6      | 1.10 | 5.03E-03 | 1.05E-02 | 1581.59  | not significant |
| 8592 | LRRC29       | 1.10 | 2.35E-01 | 3.17E-01 | 24.04    | not significant |
| 8593 | ZNF746       | 1.10 | 1.39E-02 | 2.65E-02 | 1044.96  | not significant |
| 8594 | C21orf128    | 1.10 | 2.24E-01 | 3.04E-01 | 20.84    | not significant |
| 8595 | ZNF571       | 1.10 | 2.24E-01 | 3.05E-01 | 110.49   | not significant |
| 8596 | ARL10        | 1.10 | 1.90E-01 | 2.64E-01 | 164.35   | not significant |
| 8597 | NIPSNAP1     | 1.10 | 6.29E-05 | 1.87E-04 | 4458.39  | not significant |
| 8598 | LOC100506606 | 1.10 | 2.45E-01 | 3.29E-01 | 26.41    | not significant |
| 8599 | TET3         | 1.10 | 1.69E-04 | 4.67E-04 | 3920.19  | not significant |
| 8600 | LINC01003    | 1.10 | 1.22E-01 | 1.82E-01 | 275.69   | not significant |
| 8601 | TMEM123      | 1.10 | 7.39E-06 | 2.50E-05 | 24346.00 | not significant |
| 8602 | XRCC2        | 1.10 | 8.33E-03 | 1.66E-02 | 1990.17  | not significant |
| 8603 | ELF4         | 1.10 | 1.14E-03 | 2.70E-03 | 2017.21  | not significant |
| 8604 | FAM227B      | 1.10 | 2.62E-01 | 3.48E-01 | 44.09    | not significant |
| 8605 | LOC100287098 | 1.10 | 1.72E-01 | 2.44E-01 | 13.46    | not significant |
| 8606 | ZKSCAN4      | 1.10 | 1.34E-01 | 1.97E-01 | 254.41   | not significant |
| 8607 | CLNS1A       | 1.10 | 8.89E-04 | 2.15E-03 | 4625.40  | not significant |
| 8608 | PILRB        | 1.10 | 2.35E-01 | 3.17E-01 | 24.77    | not significant |
| 8609 | LOC101927027 | 1.10 | 6.28E-02 | 1.02E-01 | 643.14   | not significant |
| 8610 | CNTRL        | 1.10 | 3.30E-04 | 8.65E-04 | 3420.66  | not significant |
| 8611 | CMTM8        | 1.10 | 7.97E-02 | 1.25E-01 | 452.90   | not significant |
| 8612 | ZNF830       | 1.10 | 3.65E-02 | 6.27E-02 | 683.16   | not significant |

|      |           |      |          |          |          |                 |
|------|-----------|------|----------|----------|----------|-----------------|
| 8613 | APLF      | 1.10 | 1.50E-01 | 2.16E-01 | 232.26   | not significant |
| 8614 | PIK3CG    | 1.10 | 6.78E-04 | 1.67E-03 | 2962.70  | not significant |
| 8615 | ZNF706    | 1.10 | 8.54E-04 | 2.07E-03 | 2258.49  | not significant |
| 8616 | MRI1      | 1.10 | 7.92E-03 | 1.59E-02 | 1467.83  | not significant |
| 8617 | ANKRD16   | 1.10 | 9.15E-02 | 1.41E-01 | 375.22   | not significant |
| 8618 | LOC728613 | 1.10 | 2.09E-01 | 2.87E-01 | 134.40   | not significant |
| 8619 | ZSCAN29   | 1.10 | 7.30E-03 | 1.48E-02 | 1374.36  | not significant |
| 8620 | F11R      | 1.10 | 2.13E-02 | 3.88E-02 | 798.87   | not significant |
| 8621 | VANGL2    | 1.10 | 1.46E-01 | 2.12E-01 | 227.29   | not significant |
| 8622 | WASL      | 1.10 | 5.07E-02 | 8.41E-02 | 510.09   | not significant |
| 8623 | SLC25A35  | 1.10 | 2.07E-01 | 2.84E-01 | 153.31   | not significant |
| 8624 | FLYWCH1   | 1.10 | 7.88E-03 | 1.58E-02 | 1166.52  | not significant |
| 8625 | PPP1R9B   | 1.10 | 1.35E-03 | 3.15E-03 | 2325.52  | not significant |
| 8626 | CCDC115   | 1.10 | 1.58E-02 | 2.97E-02 | 981.91   | not significant |
| 8627 | FYTTD1    | 1.10 | 2.50E-03 | 5.55E-03 | 1975.16  | not significant |
| 8628 | DENND4C   | 1.10 | 3.80E-04 | 9.85E-04 | 2716.45  | not significant |
| 8629 | LINC00265 | 1.10 | 5.14E-02 | 8.52E-02 | 584.46   | not significant |
| 8630 | ZNF17     | 1.10 | 9.71E-02 | 1.49E-01 | 376.01   | not significant |
| 8631 | TMEM189   | 1.10 | 9.96E-03 | 1.96E-02 | 1379.99  | not significant |
| 8632 | RNASEK    | 1.10 | 2.35E-01 | 3.17E-01 | 25.45    | not significant |
| 8633 | BCAS3     | 1.10 | 4.84E-02 | 8.07E-02 | 521.10   | not significant |
| 8634 | CRBN      | 1.10 | 6.17E-03 | 1.27E-02 | 1301.10  | not significant |
| 8635 | TYMP      | 1.10 | 1.55E-01 | 2.23E-01 | 13.29    | not significant |
| 8636 | TNFSF10   | 1.10 | 5.58E-05 | 1.67E-04 | 7190.09  | not significant |
| 8637 | RBM34     | 1.10 | 6.20E-03 | 1.27E-02 | 1376.58  | not significant |
| 8638 | PRKY      | 1.10 | 1.47E-02 | 2.78E-02 | 1023.67  | not significant |
| 8639 | VAT1      | 1.10 | 2.15E-05 | 6.82E-05 | 4617.94  | not significant |
| 8640 | ITGB1     | 1.10 | 6.35E-05 | 1.88E-04 | 6179.05  | not significant |
| 8641 | SPAST     | 1.10 | 9.89E-04 | 2.37E-03 | 2402.83  | not significant |
| 8642 | C11orf57  | 1.10 | 6.10E-04 | 1.52E-03 | 2252.91  | not significant |
| 8643 | JMJD4     | 1.10 | 5.08E-02 | 8.42E-02 | 571.93   | not significant |
| 8644 | TMEM185A  | 1.10 | 2.48E-01 | 3.31E-01 | 68.59    | not significant |
| 8645 | SERHL2    | 1.10 | 2.47E-02 | 4.44E-02 | 752.57   | not significant |
| 8646 | TYK2      | 1.10 | 2.71E-04 | 7.20E-04 | 3915.09  | not significant |
| 8647 | H2AFX     | 1.10 | 3.82E-04 | 9.89E-04 | 10303.89 | not significant |
| 8648 | PLIN2     | 1.10 | 1.87E-03 | 4.24E-03 | 2483.64  | not significant |
| 8649 | FAAH2     | 1.10 | 1.81E-01 | 2.54E-01 | 156.55   | not significant |
| 8650 | NAPEPLD   | 1.10 | 6.51E-02 | 1.05E-01 | 685.13   | not significant |
| 8651 | DNAJC14   | 1.10 | 2.82E-04 | 7.45E-04 | 3229.12  | not significant |
| 8652 | FEM1C     | 1.10 | 1.55E-02 | 2.92E-02 | 910.39   | not significant |
| 8653 | NASP      | 1.10 | 9.82E-04 | 2.35E-03 | 15349.12 | not significant |
| 8654 | TGFBR1    | 1.10 | 5.79E-03 | 1.20E-02 | 1484.44  | not significant |
| 8655 | FOXO3     | 1.10 | 2.10E-02 | 3.83E-02 | 802.26   | not significant |
| 8656 | ITPR3     | 1.10 | 8.54E-02 | 1.33E-01 | 5295.20  | not significant |
| 8657 | CDK16     | 1.10 | 1.03E-03 | 2.45E-03 | 2081.11  | not significant |
| 8658 | PHOSPHO2  | 1.10 | 2.36E-01 | 3.18E-01 | 81.62    | not significant |
| 8659 | BAZ2B     | 1.10 | 1.72E-02 | 3.21E-02 | 863.17   | not significant |
| 8660 | DAGLB     | 1.10 | 2.95E-02 | 5.20E-02 | 679.50   | not significant |
| 8661 | FZD1      | 1.10 | 1.34E-01 | 1.96E-01 | 230.09   | not significant |
| 8662 | IPW       | 1.10 | 8.92E-02 | 1.38E-01 | 358.16   | not significant |
| 8663 | PAX8      | 1.10 | 1.06E-01 | 1.61E-01 | 281.36   | not significant |
| 8664 | ADRBK1    | 1.10 | 7.14E-06 | 2.42E-05 | 15959.91 | not significant |
| 8665 | ZSCAN25   | 1.10 | 2.25E-03 | 5.03E-03 | 1626.43  | not significant |
| 8666 | BTG2      | 1.10 | 1.83E-01 | 2.57E-01 | 158.94   | not significant |
| 8667 | KIAA1551  | 1.10 | 2.33E-05 | 7.36E-05 | 4938.83  | not significant |
| 8668 | ZNF781    | 1.10 | 2.44E-01 | 3.27E-01 | 64.74    | not significant |
| 8669 | ZNF181    | 1.10 | 8.04E-02 | 1.26E-01 | 359.79   | not significant |
| 8670 | GUSBP2    | 1.10 | 2.44E-01 | 3.28E-01 | 36.15    | not significant |
| 8671 | PHF3      | 1.10 | 3.48E-05 | 1.07E-04 | 4600.58  | not significant |
| 8672 | AIM1      | 1.10 | 4.81E-05 | 1.45E-04 | 3658.53  | not significant |
| 8673 | RPL41     | 1.10 | 2.13E-01 | 2.92E-01 | 4142.52  | not significant |
| 8674 | USP21     | 1.10 | 3.43E-03 | 7.43E-03 | 1470.01  | not significant |
| 8675 | EIF4B     | 1.10 | 3.69E-06 | 1.30E-05 | 18833.96 | not significant |
| 8676 | SPIN2B    | 1.10 | 2.23E-01 | 3.04E-01 | 100.22   | not significant |
| 8677 | ROBO3     | 1.10 | 3.54E-02 | 6.11E-02 | 650.47   | not significant |
| 8678 | MRPS18A   | 1.10 | 5.13E-03 | 1.07E-02 | 1277.36  | not significant |
| 8679 | YARS2     | 1.10 | 1.90E-02 | 3.50E-02 | 763.30   | not significant |
| 8680 | HIAT1     | 1.10 | 6.86E-05 | 2.02E-04 | 3580.19  | not significant |
| 8681 | ZNF628    | 1.10 | 9.16E-02 | 1.41E-01 | 330.64   | not significant |
| 8682 | TLK2      | 1.10 | 1.76E-03 | 4.02E-03 | 1705.13  | not significant |
| 8683 | SPRY1     | 1.10 | 7.59E-02 | 1.20E-01 | 361.60   | not significant |
| 8684 | CTSC      | 1.10 | 6.49E-05 | 1.92E-04 | 4411.03  | not significant |
| 8685 | MKRN1     | 1.10 | 2.61E-04 | 6.96E-04 | 2809.76  | not significant |
| 8686 | CDIP1     | 1.10 | 7.83E-02 | 1.23E-01 | 362.26   | not significant |
| 8687 | PLCG1     | 1.10 | 1.16E-05 | 3.81E-05 | 12336.53 | not significant |
| 8688 | VSIG10    | 1.10 | 2.13E-01 | 2.92E-01 | 99.01    | not significant |
| 8689 | HNRNPA1L2 | 1.10 | 4.09E-02 | 6.94E-02 | 551.17   | not significant |
| 8690 | SLC39A13  | 1.10 | 1.82E-02 | 3.36E-02 | 782.38   | not significant |
| 8691 | ZNF543    | 1.10 | 1.24E-01 | 1.84E-01 | 243.70   | not significant |
| 8692 | ARRDC2    | 1.10 | 2.67E-02 | 4.75E-02 | 680.89   | not significant |
| 8693 | FANCF     | 1.10 | 9.61E-03 | 1.89E-02 | 1063.85  | not significant |
| 8694 | PSMB7     | 1.10 | 1.20E-03 | 2.83E-03 | 2866.97  | not significant |
| 8695 | MAP4K2    | 1.10 | 4.70E-03 | 9.93E-03 | 1281.64  | not significant |
| 8696 | LY75      | 1.10 | 4.83E-02 | 8.05E-02 | 476.75   | not significant |
| 8697 | NXF1      | 1.10 | 5.98E-04 | 1.49E-03 | 3744.03  | not significant |
| 8698 | NAGPA     | 1.10 | 4.48E-02 | 7.54E-02 | 492.10   | not significant |
| 8699 | KLF12     | 1.10 | 3.17E-04 | 8.32E-04 | 4038.94  | not significant |
| 8700 | SDHAF1    | 1.10 | 4.90E-02 | 8.17E-02 | 532.27   | not significant |

|      |              |      |          |          |         |                 |
|------|--------------|------|----------|----------|---------|-----------------|
| 8701 | TP53BP2      | 1.10 | 1.13E-04 | 3.21E-04 | 2764.39 | not significant |
| 8702 | VAMP4        | 1.10 | 1.07E-02 | 2.10E-02 | 912.73  | not significant |
| 8703 | TRAPPC11     | 1.10 | 6.47E-04 | 1.60E-03 | 1999.23 | not significant |
| 8704 | NMD3         | 1.10 | 3.67E-04 | 9.53E-04 | 2531.00 | not significant |
| 8705 | TMEM237      | 1.10 | 2.42E-04 | 6.48E-04 | 2492.61 | not significant |
| 8706 | SLC26A6      | 1.10 | 3.20E-02 | 5.60E-02 | 842.68  | not significant |
| 8707 | ZNF274       | 1.10 | 5.02E-02 | 8.34E-02 | 460.49  | not significant |
| 8708 | SH3BP2       | 1.10 | 3.60E-03 | 7.77E-03 | 2056.09 | not significant |
| 8709 | GLCCI1       | 1.10 | 2.95E-03 | 6.47E-03 | 1364.46 | not significant |
| 8710 | INTS1        | 1.10 | 6.25E-04 | 1.55E-03 | 6973.81 | not significant |
| 8711 | FAM21C       | 1.10 | 1.12E-01 | 1.69E-01 | 282.51  | not significant |
| 8712 | RSPRY1       | 1.10 | 2.98E-03 | 6.51E-03 | 1408.86 | not significant |
| 8713 | AP4B1        | 1.10 | 2.05E-02 | 3.76E-02 | 955.17  | not significant |
| 8714 | NEK1         | 1.10 | 6.48E-03 | 1.33E-02 | 1283.94 | not significant |
| 8715 | GON4L        | 1.10 | 5.96E-04 | 1.48E-03 | 2041.61 | not significant |
| 8716 | TMEM55B      | 1.10 | 9.76E-03 | 1.92E-02 | 954.74  | not significant |
| 8717 | CD8A         | 1.10 | 1.94E-05 | 6.19E-05 | 4625.00 | not significant |
| 8718 | FAM195B      | 1.10 | 3.21E-04 | 8.43E-04 | 2272.24 | not significant |
| 8719 | GOLGA2P7     | 1.10 | 1.85E-01 | 2.58E-01 | 17.86   | not significant |
| 8720 | ZNF3         | 1.10 | 4.67E-04 | 1.19E-03 | 2177.48 | not significant |
| 8721 | CDADC1       | 1.10 | 2.94E-02 | 5.19E-02 | 623.15  | not significant |
| 8722 | ALKBH2       | 1.10 | 2.01E-02 | 3.68E-02 | 804.60  | not significant |
| 8723 | TCEAL3       | 1.10 | 2.36E-01 | 3.18E-01 | 63.60   | not significant |
| 8724 | DOLPP1       | 1.10 | 1.35E-02 | 2.58E-02 | 918.95  | not significant |
| 8725 | PLTP         | 1.10 | 2.35E-01 | 3.17E-01 | 70.99   | not significant |
| 8726 | EPHA5        | 1.10 | 1.69E-01 | 2.41E-01 | 14.50   | not significant |
| 8727 | PLCB2        | 1.10 | 7.23E-03 | 1.46E-02 | 1479.43 | not significant |
| 8728 | RPL23P8      | 1.10 | 2.32E-01 | 3.13E-01 | 66.39   | not significant |
| 8729 | FBXL4        | 1.10 | 2.22E-02 | 4.03E-02 | 691.14  | not significant |
| 8730 | SEMA4B       | 1.10 | 6.68E-02 | 1.07E-01 | 413.31  | not significant |
| 8731 | AP3M2        | 1.10 | 3.56E-03 | 7.69E-03 | 1337.83 | not significant |
| 8732 | ZNF264       | 1.10 | 8.82E-03 | 1.75E-02 | 1006.04 | not significant |
| 8733 | APOL1        | 1.10 | 8.02E-03 | 1.61E-02 | 1003.18 | not significant |
| 8734 | CLIC4        | 1.10 | 2.62E-04 | 6.99E-04 | 2245.50 | not significant |
| 8735 | MYEOV2       | 1.10 | 3.46E-03 | 7.48E-03 | 1392.59 | not significant |
| 8736 | LOC101926935 | 1.10 | 9.82E-02 | 1.50E-01 | 8.50    | not significant |
| 8737 | TCEANC2      | 1.10 | 8.94E-03 | 1.77E-02 | 940.72  | not significant |
| 8738 | ANAPC13      | 1.10 | 2.55E-03 | 5.64E-03 | 1610.27 | not significant |
| 8739 | ASB9         | 1.10 | 3.27E-02 | 5.70E-02 | 541.68  | not significant |
| 8740 | CHAMP1       | 1.10 | 2.16E-01 | 2.95E-01 | 80.20   | not significant |
| 8741 | B3GALTL      | 1.10 | 8.03E-03 | 1.61E-02 | 1111.27 | not significant |
| 8742 | TMEM69       | 1.10 | 7.51E-03 | 1.51E-02 | 1092.12 | not significant |
| 8743 | OGDHL        | 1.10 | 5.69E-02 | 9.30E-02 | 441.74  | not significant |
| 8744 | DCTN4        | 1.10 | 1.49E-03 | 3.45E-03 | 1846.44 | not significant |
| 8745 | ANKH         | 1.10 | 1.31E-04 | 3.68E-04 | 2636.76 | not significant |
| 8746 | CCDC96       | 1.10 | 2.29E-01 | 3.10E-01 | 63.78   | not significant |
| 8747 | NFATC2       | 1.10 | 3.82E-04 | 9.89E-04 | 2682.54 | not significant |
| 8748 | LOC100131655 | 1.10 | 2.30E-01 | 3.11E-01 | 39.92   | not significant |
| 8749 | IFIT2        | 1.10 | 6.58E-02 | 1.06E-01 | 405.00  | not significant |
| 8750 | C21orf33     | 1.10 | 3.75E-03 | 8.08E-03 | 1322.38 | not significant |
| 8751 | ZNF484       | 1.10 | 1.93E-01 | 2.69E-01 | 115.86  | not significant |
| 8752 | SCAMP5       | 1.10 | 5.97E-02 | 9.71E-02 | 416.93  | not significant |
| 8753 | OPTN         | 1.10 | 2.72E-04 | 7.23E-04 | 2358.10 | not significant |
| 8754 | TADA2B       | 1.11 | 6.63E-03 | 1.35E-02 | 1039.79 | not significant |
| 8755 | NICN1        | 1.11 | 2.31E-02 | 4.17E-02 | 739.03  | not significant |
| 8756 | OSCP1        | 1.11 | 2.33E-01 | 3.15E-01 | 44.85   | not significant |
| 8757 | NDOR1        | 1.11 | 4.72E-03 | 9.96E-03 | 2536.41 | not significant |
| 8758 | CES3         | 1.11 | 3.35E-02 | 5.83E-02 | 595.04  | not significant |
| 8759 | SAP30BP      | 1.11 | 2.85E-04 | 7.53E-04 | 2481.76 | not significant |
| 8760 | MTR          | 1.11 | 4.96E-03 | 1.04E-02 | 2086.09 | not significant |
| 8761 | FANCC        | 1.11 | 5.30E-03 | 1.11E-02 | 1073.62 | not significant |
| 8762 | CEP85        | 1.11 | 1.76E-04 | 4.85E-04 | 2891.94 | not significant |
| 8763 | ZNF770       | 1.11 | 5.35E-04 | 1.35E-03 | 2019.95 | not significant |
| 8764 | SSH1         | 1.11 | 4.95E-04 | 1.26E-03 | 2229.13 | not significant |
| 8765 | C20orf196    | 1.11 | 8.59E-02 | 1.34E-01 | 314.62  | not significant |
| 8766 | REXO4        | 1.11 | 6.17E-02 | 1.00E-01 | 402.86  | not significant |
| 8767 | C19orf52     | 1.11 | 2.26E-02 | 4.09E-02 | 673.99  | not significant |
| 8768 | UBTD2        | 1.11 | 5.42E-03 | 1.13E-02 | 1255.39 | not significant |
| 8769 | CCNL1        | 1.11 | 1.26E-01 | 1.86E-01 | 3974.59 | not significant |
| 8770 | AP5S1        | 1.11 | 1.30E-02 | 2.49E-02 | 864.67  | not significant |
| 8771 | CNNM2        | 1.11 | 1.50E-01 | 2.16E-01 | 167.88  | not significant |
| 8772 | QTRT1        | 1.11 | 1.22E-02 | 2.35E-02 | 857.89  | not significant |
| 8773 | DRAM1        | 1.11 | 2.28E-01 | 3.10E-01 | 42.22   | not significant |
| 8774 | HPS5         | 1.11 | 5.11E-03 | 1.07E-02 | 1063.77 | not significant |
| 8775 | C10orf25     | 1.11 | 7.16E-02 | 1.14E-01 | 363.45  | not significant |
| 8776 | APIP         | 1.11 | 2.07E-03 | 4.67E-03 | 1531.19 | not significant |
| 8777 | RAPGEF2      | 1.11 | 3.92E-03 | 8.40E-03 | 1206.73 | not significant |
| 8778 | ADSS         | 1.11 | 6.73E-05 | 1.99E-04 | 3603.88 | not significant |
| 8779 | ARL2BP       | 1.11 | 3.26E-04 | 8.54E-04 | 2206.37 | not significant |
| 8780 | LOC284454    | 1.11 | 1.58E-01 | 2.26E-01 | 14.18   | not significant |
| 8781 | GK           | 1.11 | 8.67E-02 | 1.35E-01 | 339.44  | not significant |
| 8782 | CSTF3-AS1    | 1.11 | 2.10E-01 | 2.88E-01 | 83.42   | not significant |
| 8783 | ITPKC        | 1.11 | 9.09E-02 | 1.40E-01 | 361.48  | not significant |
| 8784 | ANKRD28      | 1.11 | 2.23E-05 | 7.05E-05 | 6071.00 | not significant |
| 8785 | CTC1         | 1.11 | 6.65E-02 | 1.07E-01 | 1980.51 | not significant |
| 8786 | SOCS1        | 1.11 | 7.00E-02 | 1.12E-01 | 2949.90 | not significant |
| 8787 | UNC50        | 1.11 | 6.56E-03 | 1.34E-02 | 1150.03 | not significant |
| 8788 | ZRSR2        | 1.11 | 8.64E-02 | 1.34E-01 | 287.48  | not significant |

|      |              |      |          |          |          |                 |
|------|--------------|------|----------|----------|----------|-----------------|
| 8789 | ZNF841       | 1.11 | 1.94E-01 | 2.70E-01 | 470.83   | not significant |
| 8790 | TJAP1        | 1.11 | 2.85E-03 | 6.26E-03 | 1377.22  | not significant |
| 8791 | RPL19P12     | 1.11 | 1.98E-01 | 2.74E-01 | 112.83   | not significant |
| 8792 | CEP135       | 1.11 | 6.32E-04 | 1.57E-03 | 2127.86  | not significant |
| 8793 | HECTD1       | 1.11 | 9.31E-04 | 2.24E-03 | 2938.16  | not significant |
| 8794 | PYHIN1       | 1.11 | 1.56E-03 | 3.60E-03 | 1484.08  | not significant |
| 8795 | NUMBL        | 1.11 | 8.48E-02 | 1.32E-01 | 287.47   | not significant |
| 8796 | LINC00051    | 1.11 | 2.24E-01 | 3.04E-01 | 38.98    | not significant |
| 8797 | HPCAL1       | 1.11 | 3.53E-03 | 7.62E-03 | 1302.74  | not significant |
| 8798 | CD84         | 1.11 | 2.13E-05 | 6.76E-05 | 3571.28  | not significant |
| 8799 | STAG2        | 1.11 | 2.93E-06 | 1.05E-05 | 15205.88 | not significant |
| 8800 | BRPF3        | 1.11 | 8.82E-04 | 2.13E-03 | 1743.87  | not significant |
| 8801 | HS6ST1       | 1.11 | 1.03E-04 | 2.95E-04 | 4996.40  | not significant |
| 8802 | LOC100128494 | 1.11 | 2.07E-01 | 2.85E-01 | 116.61   | not significant |
| 8803 | WDR19        | 1.11 | 4.18E-02 | 7.08E-02 | 496.60   | not significant |
| 8804 | UBR2         | 1.11 | 1.02E-03 | 2.43E-03 | 2557.74  | not significant |
| 8805 | PDDC1        | 1.11 | 5.72E-04 | 1.43E-03 | 2242.44  | not significant |
| 8806 | ZBTB3        | 1.11 | 1.68E-01 | 2.39E-01 | 135.37   | not significant |
| 8807 | PRKCH        | 1.11 | 4.03E-06 | 1.41E-05 | 11623.83 | not significant |
| 8808 | ZNF805       | 1.11 | 9.43E-02 | 1.45E-01 | 297.22   | not significant |
| 8809 | ZNF213-AS1   | 1.11 | 2.08E-01 | 2.86E-01 | 78.04    | not significant |
| 8810 | NDRG4        | 1.11 | 2.15E-01 | 2.94E-01 | 68.28    | not significant |
| 8811 | MORC3        | 1.11 | 2.28E-04 | 6.16E-04 | 2468.09  | not significant |
| 8812 | HGH1         | 1.11 | 2.19E-01 | 2.99E-01 | 35.91    | not significant |
| 8813 | DDHD1        | 1.11 | 1.39E-03 | 3.24E-03 | 3069.20  | not significant |
| 8814 | MARVELD1     | 1.11 | 1.62E-01 | 2.31E-01 | 164.75   | not significant |
| 8815 | NBAS         | 1.11 | 1.56E-03 | 3.59E-03 | 1748.94  | not significant |
| 8816 | CPSF7        | 1.11 | 1.52E-06 | 5.65E-06 | 7684.65  | not significant |
| 8817 | PIFO         | 1.11 | 1.86E-01 | 2.60E-01 | 19.87    | not significant |
| 8818 | GCDH         | 1.11 | 3.66E-03 | 7.90E-03 | 1206.82  | not significant |
| 8819 | SLC7A7       | 1.11 | 1.06E-01 | 1.60E-01 | 9.62     | not significant |
| 8820 | CATSPER3     | 1.11 | 2.08E-01 | 2.86E-01 | 28.69    | not significant |
| 8821 | SUGT1        | 1.11 | 1.81E-03 | 4.12E-03 | 1763.90  | not significant |
| 8822 | RRAGD        | 1.11 | 1.51E-03 | 3.50E-03 | 1374.76  | not significant |
| 8823 | DCAF8        | 1.11 | 6.38E-04 | 1.58E-03 | 3384.15  | not significant |
| 8824 | CYB5D1       | 1.11 | 9.31E-03 | 1.84E-02 | 914.26   | not significant |
| 8825 | RPL37A       | 1.11 | 9.47E-05 | 2.73E-04 | 23817.45 | not significant |
| 8826 | ARHGAP32     | 1.11 | 3.31E-04 | 8.66E-04 | 2239.41  | not significant |
| 8827 | TPP1         | 1.11 | 1.04E-05 | 3.43E-05 | 3958.53  | not significant |
| 8828 | ZNF707       | 1.11 | 2.19E-01 | 2.99E-01 | 46.10    | not significant |
| 8829 | SEMA6C       | 1.11 | 1.94E-01 | 2.70E-01 | 91.76    | not significant |
| 8830 | PAQR4        | 1.11 | 2.78E-04 | 7.37E-04 | 2102.30  | not significant |
| 8831 | RTKN         | 1.11 | 1.78E-01 | 2.50E-01 | 20.61    | not significant |
| 8832 | FLII         | 1.11 | 9.08E-07 | 3.45E-06 | 6359.29  | not significant |
| 8833 | RFX1         | 1.11 | 2.44E-02 | 4.39E-02 | 655.87   | not significant |
| 8834 | PRIM2        | 1.11 | 1.78E-03 | 4.07E-03 | 1516.52  | not significant |
| 8835 | RPL38        | 1.11 | 8.90E-06 | 2.98E-05 | 15663.81 | not significant |
| 8836 | LINC00963    | 1.11 | 9.48E-02 | 1.46E-01 | 9.29     | not significant |
| 8837 | TRIM56       | 1.11 | 5.85E-04 | 1.46E-03 | 1780.33  | not significant |
| 8838 | ZYX          | 1.11 | 7.29E-02 | 1.16E-01 | 318.60   | not significant |
| 8839 | FAM195A      | 1.11 | 1.72E-01 | 2.44E-01 | 20.47    | not significant |
| 8840 | MAP2K5       | 1.11 | 2.21E-03 | 4.95E-03 | 1240.41  | not significant |
| 8841 | NUCKS1       | 1.11 | 7.12E-06 | 2.42E-05 | 23057.94 | not significant |
| 8842 | CUL4B        | 1.11 | 1.38E-04 | 3.86E-04 | 3154.18  | not significant |
| 8843 | C4orf46      | 1.11 | 9.78E-05 | 2.81E-04 | 2988.66  | not significant |
| 8844 | MRPL9        | 1.11 | 9.00E-05 | 2.60E-04 | 2743.91  | not significant |
| 8845 | CERKL        | 1.11 | 1.76E-01 | 2.48E-01 | 25.33    | not significant |
| 8846 | WRN          | 1.11 | 7.14E-04 | 1.75E-03 | 2319.64  | not significant |
| 8847 | CDIPT        | 1.11 | 6.10E-04 | 1.52E-03 | 2634.90  | not significant |
| 8848 | LINC00630    | 1.11 | 1.76E-01 | 2.49E-01 | 105.84   | not significant |
| 8849 | SOCS5        | 1.11 | 1.62E-02 | 3.03E-02 | 712.75   | not significant |
| 8850 | ENC1         | 1.11 | 1.75E-02 | 3.26E-02 | 649.94   | not significant |
| 8851 | LINC00950    | 1.11 | 1.10E-01 | 1.66E-01 | 10.64    | not significant |
| 8852 | MSL2         | 1.11 | 5.88E-08 | 2.59E-07 | 7868.34  | not significant |
| 8853 | ADAT1        | 1.11 | 4.02E-03 | 8.61E-03 | 1016.65  | not significant |
| 8854 | LOC100507557 | 1.11 | 1.92E-01 | 2.67E-01 | 25.34    | not significant |
| 8855 | FAM53B       | 1.11 | 6.81E-04 | 1.68E-03 | 2505.30  | not significant |
| 8856 | RYBP         | 1.11 | 1.44E-03 | 3.34E-03 | 1509.41  | not significant |
| 8857 | TYMS         | 1.11 | 7.47E-06 | 2.52E-05 | 27827.08 | not significant |
| 8858 | ATP9B        | 1.11 | 9.58E-03 | 1.89E-02 | 814.69   | not significant |
| 8859 | SZT2         | 1.11 | 1.24E-01 | 1.84E-01 | 1715.06  | not significant |
| 8860 | UAP1L1       | 1.11 | 1.98E-01 | 2.74E-01 | 27.27    | not significant |
| 8861 | ST5          | 1.11 | 1.44E-01 | 2.10E-01 | 14.17    | not significant |
| 8862 | COG6         | 1.11 | 8.17E-03 | 1.63E-02 | 903.22   | not significant |
| 8863 | NFYC-AS1     | 1.11 | 1.89E-01 | 2.64E-01 | 121.16   | not significant |
| 8864 | SGPL1        | 1.11 | 7.56E-04 | 1.84E-03 | 1543.43  | not significant |
| 8865 | UBA52        | 1.11 | 1.39E-04 | 3.89E-04 | 16496.43 | not significant |
| 8866 | LOC101928812 | 1.11 | 1.58E-01 | 2.27E-01 | 16.25    | not significant |
| 8867 | NKD2         | 1.11 | 7.22E-03 | 1.46E-02 | 943.59   | not significant |
| 8868 | ZNF772       | 1.11 | 1.64E-02 | 3.07E-02 | 655.42   | not significant |
| 8869 | KDM4A        | 1.11 | 6.14E-04 | 1.53E-03 | 1977.28  | not significant |
| 8870 | DCAF15       | 1.11 | 2.35E-04 | 6.32E-04 | 3155.77  | not significant |
| 8871 | ZNF217       | 1.11 | 6.69E-05 | 1.98E-04 | 3094.79  | not significant |
| 8872 | MICA         | 1.11 | 2.12E-01 | 2.91E-01 | 51.06    | not significant |
| 8873 | BUD13        | 1.11 | 7.04E-04 | 1.73E-03 | 1718.07  | not significant |
| 8874 | RELL1        | 1.11 | 8.54E-02 | 1.33E-01 | 275.44   | not significant |
| 8875 | KLHL26       | 1.11 | 6.11E-02 | 9.90E-02 | 382.55   | not significant |
| 8876 | LAMP1        | 1.11 | 8.03E-06 | 2.70E-05 | 5364.32  | not significant |

|      |              |      |          |          |          |                 |
|------|--------------|------|----------|----------|----------|-----------------|
| 8877 | LOC100506124 | 1.11 | 2.09E-01 | 2.87E-01 | 40.32    | not significant |
| 8878 | SLC38A9      | 1.11 | 3.24E-03 | 7.05E-03 | 1092.34  | not significant |
| 8879 | WASH1        | 1.11 | 1.76E-01 | 2.48E-01 | 111.39   | not significant |
| 8880 | MUC1         | 1.11 | 1.36E-01 | 1.99E-01 | 12.86    | not significant |
| 8881 | NLGN3        | 1.11 | 1.56E-01 | 2.24E-01 | 143.15   | not significant |
| 8882 | ARL5B        | 1.11 | 4.09E-03 | 8.73E-03 | 1266.13  | not significant |
| 8883 | LOC100506476 | 1.11 | 1.24E-01 | 1.84E-01 | 12.00    | not significant |
| 8884 | STK36        | 1.11 | 1.17E-01 | 1.75E-01 | 231.50   | not significant |
| 8885 | PLAUR        | 1.11 | 7.15E-02 | 1.14E-01 | 318.44   | not significant |
| 8886 | IRF2         | 1.11 | 7.01E-04 | 1.72E-03 | 1751.87  | not significant |
| 8887 | PDE4DIP      | 1.11 | 5.50E-02 | 9.05E-02 | 404.55   | not significant |
| 8888 | ZNF195       | 1.11 | 2.02E-03 | 4.56E-03 | 1389.38  | not significant |
| 8889 | FUOM         | 1.11 | 1.57E-01 | 2.25E-01 | 137.38   | not significant |
| 8890 | GPC1         | 1.11 | 1.82E-01 | 2.55E-01 | 94.42    | not significant |
| 8891 | FLJ37453     | 1.11 | 1.40E-01 | 2.05E-01 | 156.89   | not significant |
| 8892 | GPR17        | 1.11 | 2.07E-01 | 2.84E-01 | 45.93    | not significant |
| 8893 | GLB1L2       | 1.11 | 1.08E-01 | 1.63E-01 | 213.57   | not significant |
| 8894 | DXO          | 1.11 | 1.74E-01 | 2.46E-01 | 105.14   | not significant |
| 8895 | PGM1         | 1.11 | 6.33E-05 | 1.88E-04 | 2479.27  | not significant |
| 8896 | 43714_12910  | 1.11 | 4.54E-09 | 2.25E-08 | 22381.28 | not significant |
| 8897 | ZNF180       | 1.11 | 4.16E-02 | 7.06E-02 | 486.43   | not significant |
| 8898 | ZNF765       | 1.11 | 1.73E-02 | 3.22E-02 | 606.91   | not significant |
| 8899 | CCDC146      | 1.11 | 2.49E-02 | 4.47E-02 | 562.60   | not significant |
| 8900 | KLHDC4       | 1.11 | 5.51E-04 | 1.39E-03 | 1627.64  | not significant |
| 8901 | VLDLR        | 1.11 | 5.86E-02 | 9.54E-02 | 342.18   | not significant |
| 8902 | TMEM263      | 1.11 | 1.77E-05 | 5.68E-05 | 3479.61  | not significant |
| 8903 | KBTBD6       | 1.11 | 3.40E-02 | 5.91E-02 | 555.28   | not significant |
| 8904 | SLC39A6      | 1.11 | 1.59E-05 | 5.13E-05 | 4704.14  | not significant |
| 8905 | TERF2IP      | 1.11 | 1.26E-04 | 3.56E-04 | 4920.64  | not significant |
| 8906 | DTX3L        | 1.11 | 5.72E-06 | 1.96E-05 | 4233.82  | not significant |
| 8907 | HAUS5        | 1.11 | 1.27E-04 | 3.59E-04 | 2383.97  | not significant |
| 8908 | NIPSNAP3A    | 1.11 | 4.63E-03 | 9.79E-03 | 941.31   | not significant |
| 8909 | TRIM33       | 1.11 | 3.97E-04 | 1.02E-03 | 4033.87  | not significant |
| 8910 | CMAHP        | 1.11 | 1.60E-03 | 3.68E-03 | 2855.42  | not significant |
| 8911 | TMEM43       | 1.11 | 1.95E-04 | 5.31E-04 | 2103.20  | not significant |
| 8912 | TMEM106B     | 1.11 | 1.08E-04 | 3.06E-04 | 2405.73  | not significant |
| 8913 | DCAF12       | 1.11 | 1.43E-05 | 4.66E-05 | 4365.59  | not significant |
| 8914 | PARP3        | 1.11 | 1.57E-02 | 2.95E-02 | 657.43   | not significant |
| 8915 | ZBTB40       | 1.11 | 1.80E-03 | 4.11E-03 | 2378.05  | not significant |
| 8916 | LINC00526    | 1.11 | 1.94E-01 | 2.70E-01 | 77.58    | not significant |
| 8917 | LINC01137    | 1.11 | 1.97E-01 | 2.73E-01 | 31.44    | not significant |
| 8918 | ENKD1        | 1.11 | 6.80E-02 | 1.09E-01 | 316.91   | not significant |
| 8919 | ADAM11       | 1.11 | 1.41E-01 | 2.05E-01 | 14.20    | not significant |
| 8920 | ARRDC1-AS1   | 1.11 | 4.10E-02 | 6.96E-02 | 399.73   | not significant |
| 8921 | BMPR1A       | 1.11 | 3.69E-02 | 6.34E-02 | 449.67   | not significant |
| 8922 | CCDC22       | 1.11 | 5.44E-02 | 8.97E-02 | 362.98   | not significant |
| 8923 | KIF3A        | 1.11 | 1.00E-04 | 2.88E-04 | 2322.74  | not significant |
| 8924 | TYMSOS       | 1.11 | 1.57E-01 | 2.25E-01 | 125.90   | not significant |
| 8925 | GATSL3       | 1.11 | 5.72E-03 | 1.18E-02 | 878.50   | not significant |
| 8926 | CERK         | 1.11 | 4.75E-06 | 1.65E-05 | 4223.41  | not significant |
| 8927 | STK32C       | 1.11 | 1.17E-01 | 1.75E-01 | 12.89    | not significant |
| 8928 | CEP162       | 1.11 | 1.54E-02 | 2.90E-02 | 623.64   | not significant |
| 8929 | FADS3        | 1.11 | 2.04E-01 | 2.81E-01 | 57.65    | not significant |
| 8930 | PGRMC1       | 1.11 | 8.66E-05 | 2.51E-04 | 2548.06  | not significant |
| 8931 | PEX2         | 1.11 | 3.33E-04 | 8.71E-04 | 2476.91  | not significant |
| 8932 | LAMP2        | 1.11 | 9.16E-06 | 3.06E-05 | 4291.42  | not significant |
| 8933 | WHAMM        | 1.11 | 4.80E-02 | 8.02E-02 | 394.64   | not significant |
| 8934 | ZSCAN18      | 1.11 | 1.65E-03 | 3.78E-03 | 1225.38  | not significant |
| 8935 | MAP3K1       | 1.11 | 6.07E-02 | 9.85E-02 | 340.67   | not significant |
| 8936 | SMCHD1       | 1.11 | 6.06E-06 | 2.07E-05 | 8969.68  | not significant |
| 8937 | BET1L        | 1.11 | 9.94E-04 | 2.38E-03 | 1677.21  | not significant |
| 8938 | ZHX2         | 1.11 | 8.17E-02 | 1.28E-01 | 258.07   | not significant |
| 8939 | ZNF615       | 1.11 | 2.06E-02 | 3.76E-02 | 539.46   | not significant |
| 8940 | KIAA0226     | 1.11 | 2.54E-03 | 5.63E-03 | 1402.37  | not significant |
| 8941 | LIN52        | 1.11 | 1.19E-02 | 2.29E-02 | 726.45   | not significant |
| 8942 | TMUB1        | 1.11 | 3.89E-04 | 1.01E-03 | 2087.74  | not significant |
| 8943 | PLEKHA8      | 1.11 | 5.63E-04 | 1.41E-03 | 1773.38  | not significant |
| 8944 | CLN3         | 1.11 | 1.64E-03 | 3.76E-03 | 1262.01  | not significant |
| 8945 | RAD52        | 1.11 | 1.68E-02 | 3.13E-02 | 727.01   | not significant |
| 8946 | TSTD2        | 1.11 | 5.40E-03 | 1.12E-02 | 1007.50  | not significant |
| 8947 | RAB27A       | 1.11 | 3.21E-04 | 8.43E-04 | 1815.77  | not significant |
| 8948 | ARID3B       | 1.11 | 1.28E-04 | 3.61E-04 | 2056.00  | not significant |
| 8949 | RUSC1-AS1    | 1.11 | 1.50E-01 | 2.17E-01 | 16.10    | not significant |
| 8950 | ZMIZ1        | 1.11 | 2.92E-06 | 1.04E-05 | 7231.40  | not significant |
| 8951 | ZBTB45       | 1.11 | 4.91E-02 | 8.17E-02 | 427.62   | not significant |
| 8952 | PCYOX1L      | 1.11 | 4.07E-02 | 6.90E-02 | 463.91   | not significant |
| 8953 | CD59         | 1.11 | 6.77E-04 | 1.67E-03 | 1938.06  | not significant |
| 8954 | AGTPBP1      | 1.11 | 1.55E-03 | 3.58E-03 | 1309.40  | not significant |
| 8955 | RNF7         | 1.11 | 9.90E-04 | 2.37E-03 | 1507.50  | not significant |
| 8956 | DHRS11       | 1.12 | 1.91E-01 | 2.65E-01 | 67.34    | not significant |
| 8957 | NKTR         | 1.12 | 1.61E-01 | 2.30E-01 | 5182.03  | not significant |
| 8958 | MGC72080     | 1.12 | 5.98E-02 | 9.72E-02 | 307.18   | not significant |
| 8959 | ZNF865       | 1.12 | 9.99E-03 | 1.96E-02 | 742.47   | not significant |
| 8960 | ZDHHC17      | 1.12 | 2.03E-04 | 5.54E-04 | 1862.35  | not significant |
| 8961 | C17orf85     | 1.12 | 3.57E-06 | 1.26E-05 | 4429.85  | not significant |
| 8962 | VHL          | 1.12 | 2.04E-06 | 7.43E-06 | 5516.95  | not significant |
| 8963 | DENND4B      | 1.12 | 2.38E-04 | 6.40E-04 | 4119.87  | not significant |
| 8964 | SYNJ1        | 1.12 | 5.66E-03 | 1.17E-02 | 1010.67  | not significant |

|      |              |      |          |          |          |                 |
|------|--------------|------|----------|----------|----------|-----------------|
| 8965 | PTCH1        | 1.12 | 1.54E-01 | 2.22E-01 | 117.45   | not significant |
| 8966 | XPC          | 1.12 | 1.21E-03 | 2.86E-03 | 1258.05  | not significant |
| 8967 | PRTFDC1      | 1.12 | 4.77E-03 | 1.01E-02 | 1059.10  | not significant |
| 8968 | PGM3         | 1.12 | 2.65E-02 | 4.73E-02 | 531.08   | not significant |
| 8969 | PINLYP       | 1.12 | 4.30E-02 | 7.27E-02 | 412.82   | not significant |
| 8970 | ZNF213       | 1.12 | 3.08E-02 | 5.41E-02 | 503.16   | not significant |
| 8971 | SUGP2        | 1.12 | 1.10E-01 | 1.65E-01 | 5792.06  | not significant |
| 8972 | NLRX1        | 1.12 | 5.88E-03 | 1.21E-02 | 924.79   | not significant |
| 8973 | DEAF1        | 1.12 | 2.28E-03 | 5.10E-03 | 1257.32  | not significant |
| 8974 | OSGIN2       | 1.12 | 1.51E-03 | 3.49E-03 | 1468.39  | not significant |
| 8975 | RSL24D1      | 1.12 | 2.08E-05 | 6.60E-05 | 4084.36  | not significant |
| 8976 | IQCH-AS1     | 1.12 | 1.10E-01 | 1.65E-01 | 197.63   | not significant |
| 8977 | DNAJB2       | 1.12 | 9.32E-03 | 1.84E-02 | 865.79   | not significant |
| 8978 | SIPA1L3      | 1.12 | 1.43E-03 | 3.33E-03 | 1458.89  | not significant |
| 8979 | EPC1         | 1.12 | 8.43E-04 | 2.04E-03 | 1775.04  | not significant |
| 8980 | JADE2        | 1.12 | 1.73E-06 | 6.37E-06 | 4832.03  | not significant |
| 8981 | ATP8A1       | 1.12 | 3.95E-03 | 8.46E-03 | 1069.33  | not significant |
| 8982 | PRRG4        | 1.12 | 4.72E-02 | 7.90E-02 | 346.32   | not significant |
| 8983 | HDAC10       | 1.12 | 7.35E-03 | 1.48E-02 | 1206.68  | not significant |
| 8984 | SMG1P5       | 1.12 | 1.41E-01 | 2.05E-01 | 17.43    | not significant |
| 8985 | ZNF552       | 1.12 | 9.50E-02 | 1.46E-01 | 222.03   | not significant |
| 8986 | FBXO36       | 1.12 | 1.70E-01 | 2.42E-01 | 92.27    | not significant |
| 8987 | TBC1D15      | 1.12 | 1.25E-04 | 3.54E-04 | 2010.81  | not significant |
| 8988 | CD1A         | 1.12 | 5.66E-04 | 1.42E-03 | 1828.60  | not significant |
| 8989 | ZNF710       | 1.12 | 6.63E-03 | 1.35E-02 | 859.44   | not significant |
| 8990 | SSR3         | 1.12 | 5.06E-07 | 1.99E-06 | 6569.21  | not significant |
| 8991 | GCSAM        | 1.12 | 8.59E-04 | 2.08E-03 | 1572.35  | not significant |
| 8992 | LOC101927621 | 1.12 | 1.79E-01 | 2.52E-01 | 83.19    | not significant |
| 8993 | FAM24B       | 1.12 | 9.33E-02 | 1.44E-01 | 229.32   | not significant |
| 8994 | EFNB1        | 1.12 | 7.14E-02 | 1.14E-01 | 258.89   | not significant |
| 8995 | SLC3A2       | 1.12 | 1.41E-06 | 5.26E-06 | 5047.78  | not significant |
| 8996 | OARD1        | 1.12 | 2.79E-03 | 6.15E-03 | 1338.25  | not significant |
| 8997 | SLC2A11      | 1.12 | 1.11E-01 | 1.66E-01 | 221.73   | not significant |
| 8998 | REEP2        | 1.12 | 3.90E-02 | 6.66E-02 | 438.57   | not significant |
| 8999 | WIZ          | 1.12 | 9.23E-05 | 2.67E-04 | 2110.32  | not significant |
| 9000 | LEPRE1       | 1.12 | 1.45E-03 | 3.37E-03 | 1301.20  | not significant |
| 9001 | C2orf15      | 1.12 | 1.72E-01 | 2.44E-01 | 24.19    | not significant |
| 9002 | BSCL2        | 1.12 | 1.46E-01 | 2.12E-01 | 121.12   | not significant |
| 9003 | LMF1         | 1.12 | 6.06E-02 | 9.83E-02 | 309.68   | not significant |
| 9004 | SLC25A25     | 1.12 | 3.53E-03 | 7.63E-03 | 976.25   | not significant |
| 9005 | H3F3B        | 1.12 | 1.83E-07 | 7.58E-07 | 38721.49 | not significant |
| 9006 | GLI4         | 1.12 | 1.95E-02 | 3.59E-02 | 645.30   | not significant |
| 9007 | TRIM44       | 1.12 | 1.91E-01 | 2.66E-01 | 56.88    | not significant |
| 9008 | PAIP1        | 1.12 | 2.88E-03 | 6.32E-03 | 1206.00  | not significant |
| 9009 | C9orf91      | 1.12 | 1.71E-03 | 3.91E-03 | 1170.55  | not significant |
| 9010 | REC8         | 1.12 | 1.82E-02 | 3.36E-02 | 649.70   | not significant |
| 9011 | P2RY11       | 1.12 | 1.77E-01 | 2.50E-01 | 87.16    | not significant |
| 9012 | TROVE2       | 1.12 | 2.95E-03 | 6.47E-03 | 1147.88  | not significant |
| 9013 | GUCD1        | 1.12 | 3.00E-05 | 9.33E-05 | 3661.91  | not significant |
| 9014 | CRY1         | 1.12 | 1.29E-04 | 3.64E-04 | 1970.17  | not significant |
| 9015 | TTC21B       | 1.12 | 2.11E-03 | 4.74E-03 | 1245.25  | not significant |
| 9016 | SLC30A4      | 1.12 | 9.85E-02 | 1.51E-01 | 191.58   | not significant |
| 9017 | CHD9         | 1.12 | 3.30E-05 | 1.02E-04 | 3095.56  | not significant |
| 9018 | AURKAPS1     | 1.12 | 1.89E-01 | 2.64E-01 | 37.55    | not significant |
| 9019 | BRF1         | 1.12 | 6.34E-04 | 1.57E-03 | 1576.29  | not significant |
| 9020 | MYL5         | 1.12 | 1.90E-01 | 2.65E-01 | 44.67    | not significant |
| 9021 | USP37        | 1.12 | 9.74E-05 | 2.80E-04 | 2235.31  | not significant |
| 9022 | KCNK6        | 1.12 | 1.60E-01 | 2.28E-01 | 98.05    | not significant |
| 9023 | GTF2F1       | 1.12 | 1.85E-06 | 6.77E-06 | 4487.26  | not significant |
| 9024 | SAMD4B       | 1.12 | 1.12E-04 | 3.17E-04 | 2136.81  | not significant |
| 9025 | OSTC         | 1.12 | 3.33E-05 | 1.03E-04 | 3997.66  | not significant |
| 9026 | TSSC1        | 1.12 | 2.89E-04 | 7.63E-04 | 2269.16  | not significant |
| 9027 | RYK          | 1.12 | 4.77E-04 | 1.21E-03 | 1446.62  | not significant |
| 9028 | TTC33        | 1.12 | 1.78E-03 | 4.05E-03 | 1229.39  | not significant |
| 9029 | RAB39B       | 1.12 | 1.82E-01 | 2.55E-01 | 32.99    | not significant |
| 9030 | IRAK1        | 1.12 | 4.18E-04 | 1.08E-03 | 1769.12  | not significant |
| 9031 | PBX4         | 1.12 | 1.19E-01 | 1.77E-01 | 157.44   | not significant |
| 9032 | ZNRF2        | 1.12 | 1.31E-03 | 3.07E-03 | 1502.28  | not significant |
| 9033 | MTMR3        | 1.12 | 4.54E-04 | 1.16E-03 | 1808.59  | not significant |
| 9034 | PPP2R1A      | 1.12 | 1.93E-06 | 7.06E-06 | 7516.73  | not significant |
| 9035 | ITFG1        | 1.12 | 1.87E-03 | 4.24E-03 | 1529.94  | not significant |
| 9036 | ICK          | 1.12 | 1.48E-02 | 2.80E-02 | 610.95   | not significant |
| 9037 | P4HB         | 1.12 | 7.00E-08 | 3.04E-07 | 27890.83 | not significant |
| 9038 | POLE4        | 1.12 | 5.32E-03 | 1.11E-02 | 809.59   | not significant |
| 9039 | DEPDC5       | 1.12 | 4.09E-03 | 8.73E-03 | 937.50   | not significant |
| 9040 | C15orf57     | 1.12 | 5.63E-02 | 9.22E-02 | 320.40   | not significant |
| 9041 | KIAA1462     | 1.12 | 4.48E-02 | 7.53E-02 | 352.60   | not significant |
| 9042 | PTGER4       | 1.12 | 4.05E-06 | 1.42E-05 | 5443.60  | not significant |
| 9043 | CDPF1        | 1.12 | 6.83E-02 | 1.09E-01 | 267.87   | not significant |
| 9044 | SDHAP2       | 1.12 | 1.70E-01 | 2.41E-01 | 82.15    | not significant |
| 9045 | BCL2A1       | 1.12 | 1.85E-01 | 2.59E-01 | 52.38    | not significant |
| 9046 | POLN         | 1.12 | 1.79E-01 | 2.52E-01 | 42.17    | not significant |
| 9047 | EIF4ENIF1    | 1.12 | 4.59E-04 | 1.17E-03 | 1534.95  | not significant |
| 9048 | TMEM160      | 1.12 | 8.42E-03 | 1.68E-02 | 919.37   | not significant |
| 9049 | WIPF1        | 1.12 | 1.15E-07 | 4.86E-07 | 11707.83 | not significant |
| 9050 | C5orf15      | 1.12 | 1.51E-04 | 4.21E-04 | 1736.32  | not significant |
| 9051 | PLEKHA1      | 1.12 | 1.83E-01 | 2.57E-01 | 44.46    | not significant |
| 9052 | ANKRD12      | 1.12 | 3.78E-05 | 1.16E-04 | 2483.00  | not significant |

|      |              |      |          |          |          |                 |
|------|--------------|------|----------|----------|----------|-----------------|
| 9053 | LOC100507564 | 1.12 | 1.17E-01 | 1.75E-01 | 14.21    | not significant |
| 9054 | ZNF853       | 1.12 | 1.76E-01 | 2.48E-01 | 32.56    | not significant |
| 9055 | AHCYL2       | 1.12 | 1.07E-03 | 2.54E-03 | 1341.39  | not significant |
| 9056 | ZNF574       | 1.12 | 1.24E-02 | 2.39E-02 | 670.41   | not significant |
| 9057 | COMMD5       | 1.12 | 4.73E-02 | 7.91E-02 | 357.42   | not significant |
| 9058 | THRIL        | 1.12 | 1.43E-01 | 2.09E-01 | 23.89    | not significant |
| 9059 | SPATS2       | 1.12 | 4.34E-04 | 1.11E-03 | 1458.15  | not significant |
| 9060 | DGKA         | 1.12 | 3.94E-02 | 6.72E-02 | 5898.20  | not significant |
| 9061 | RRM2         | 1.12 | 7.10E-08 | 3.08E-07 | 20641.00 | not significant |
| 9062 | PTBP2        | 1.12 | 4.49E-03 | 9.52E-03 | 893.68   | not significant |
| 9063 | SLC5A3       | 1.12 | 2.58E-02 | 4.62E-02 | 5188.97  | not significant |
| 9064 | LRRC1        | 1.12 | 3.44E-02 | 5.97E-02 | 382.36   | not significant |
| 9065 | NFATC1       | 1.12 | 1.32E-03 | 3.09E-03 | 1388.12  | not significant |
| 9066 | PLEK         | 1.12 | 1.26E-01 | 1.87E-01 | 15.16    | not significant |
| 9067 | IFT22        | 1.12 | 1.96E-02 | 3.60E-02 | 514.53   | not significant |
| 9068 | TDRD3        | 1.12 | 1.07E-02 | 2.08E-02 | 628.66   | not significant |
| 9069 | CEP152       | 1.12 | 1.50E-05 | 4.85E-05 | 2612.25  | not significant |
| 9070 | PAIP2        | 1.12 | 4.60E-07 | 1.82E-06 | 8559.06  | not significant |
| 9071 | TRABD        | 1.12 | 7.65E-07 | 2.93E-06 | 4065.63  | not significant |
| 9072 | PTPN9        | 1.12 | 4.13E-04 | 1.06E-03 | 1937.99  | not significant |
| 9073 | WDTC1        | 1.12 | 4.40E-05 | 1.34E-04 | 3222.50  | not significant |
| 9074 | PI4KAP2      | 1.12 | 9.69E-02 | 1.49E-01 | 196.42   | not significant |
| 9075 | SPPL3        | 1.12 | 7.51E-06 | 2.54E-05 | 3749.49  | not significant |
| 9076 | ZNF512       | 1.12 | 2.74E-06 | 9.83E-06 | 3346.96  | not significant |
| 9077 | VAMP3        | 1.12 | 2.92E-03 | 6.40E-03 | 978.10   | not significant |
| 9078 | XRN2         | 1.12 | 2.33E-09 | 1.19E-08 | 9215.83  | not significant |
| 9079 | RDH14        | 1.12 | 1.78E-01 | 2.51E-01 | 61.73    | not significant |
| 9080 | THOC5        | 1.12 | 9.04E-05 | 2.61E-04 | 1912.76  | not significant |
| 9081 | NUDT2        | 1.12 | 7.83E-03 | 1.57E-02 | 860.95   | not significant |
| 9082 | CACNB1       | 1.12 | 2.36E-02 | 4.25E-02 | 541.49   | not significant |
| 9083 | TPT1-AS1     | 1.12 | 7.01E-02 | 1.12E-01 | 235.52   | not significant |
| 9084 | UBAC2        | 1.12 | 4.59E-06 | 1.59E-05 | 3098.44  | not significant |
| 9085 | SIMC1        | 1.12 | 2.30E-02 | 4.16E-02 | 474.15   | not significant |
| 9086 | SLC22A18     | 1.12 | 1.55E-01 | 2.22E-01 | 99.06    | not significant |
| 9087 | KAT6A        | 1.12 | 7.43E-08 | 3.22E-07 | 8826.85  | not significant |
| 9088 | MTHFS        | 1.12 | 1.67E-01 | 2.37E-01 | 27.10    | not significant |
| 9089 | AQP11        | 1.12 | 1.43E-01 | 2.08E-01 | 20.70    | not significant |
| 9090 | BCOR         | 1.12 | 3.00E-05 | 9.33E-05 | 4740.27  | not significant |
| 9091 | SFT2D2       | 1.12 | 3.86E-02 | 6.59E-02 | 353.76   | not significant |
| 9092 | IL16         | 1.12 | 2.35E-05 | 7.41E-05 | 2325.52  | not significant |
| 9093 | BRD8         | 1.12 | 3.96E-05 | 1.21E-04 | 2797.73  | not significant |
| 9094 | CEP290       | 1.12 | 3.18E-03 | 6.92E-03 | 1246.46  | not significant |
| 9095 | IDS          | 1.12 | 2.76E-02 | 4.90E-02 | 413.87   | not significant |
| 9096 | CC2D1A       | 1.12 | 9.90E-04 | 2.37E-03 | 1457.21  | not significant |
| 9097 | RUFY1        | 1.12 | 9.57E-05 | 2.76E-04 | 1991.81  | not significant |
| 9098 | USP46        | 1.12 | 3.97E-02 | 6.77E-02 | 332.49   | not significant |
| 9099 | RANBP9       | 1.12 | 7.19E-07 | 2.77E-06 | 3708.63  | not significant |
| 9100 | DUSP14       | 1.12 | 6.71E-03 | 1.37E-02 | 813.02   | not significant |
| 9101 | GPR107       | 1.12 | 6.88E-03 | 1.40E-02 | 691.30   | not significant |
| 9102 | CENPB        | 1.12 | 1.39E-04 | 3.88E-04 | 5156.58  | not significant |
| 9103 | COX14        | 1.12 | 8.05E-03 | 1.61E-02 | 690.28   | not significant |
| 9104 | CTDSP2       | 1.12 | 1.14E-06 | 4.28E-06 | 14808.67 | not significant |
| 9105 | TRMT12       | 1.12 | 1.34E-02 | 2.57E-02 | 550.11   | not significant |
| 9106 | SLC18B1      | 1.12 | 9.77E-03 | 1.92E-02 | 624.87   | not significant |
| 9107 | TMEM25       | 1.12 | 1.59E-01 | 2.27E-01 | 27.08    | not significant |
| 9108 | CLGN         | 1.12 | 1.50E-03 | 3.47E-03 | 1364.19  | not significant |
| 9109 | TCP11L1      | 1.12 | 1.06E-02 | 2.06E-02 | 670.51   | not significant |
| 9110 | TBC1D13      | 1.12 | 5.69E-03 | 1.18E-02 | 877.32   | not significant |
| 9111 | ERG          | 1.12 | 1.06E-03 | 2.53E-03 | 1673.71  | not significant |
| 9112 | LINC01215    | 1.12 | 2.70E-04 | 7.19E-04 | 1566.91  | not significant |
| 9113 | DAG1         | 1.12 | 3.76E-03 | 8.09E-03 | 889.90   | not significant |
| 9114 | UBALD2       | 1.12 | 3.75E-07 | 1.50E-06 | 5050.64  | not significant |
| 9115 | AEBP1        | 1.12 | 2.61E-02 | 4.66E-02 | 27805.30 | not significant |
| 9116 | USF1         | 1.12 | 3.99E-05 | 1.22E-04 | 2581.06  | not significant |
| 9117 | FAM213A      | 1.12 | 2.44E-04 | 6.54E-04 | 1486.62  | not significant |
| 9118 | PPP1R12B     | 1.12 | 4.07E-03 | 8.69E-03 | 785.57   | not significant |
| 9119 | DAPP1        | 1.12 | 1.02E-01 | 1.56E-01 | 158.34   | not significant |
| 9120 | RASSF2       | 1.12 | 6.56E-06 | 2.23E-05 | 2969.58  | not significant |
| 9121 | RAI1         | 1.12 | 3.18E-05 | 9.85E-05 | 2706.49  | not significant |
| 9122 | SNTB2        | 1.12 | 1.83E-03 | 4.16E-03 | 1303.80  | not significant |
| 9123 | TCEAL1       | 1.12 | 1.26E-01 | 1.86E-01 | 128.43   | not significant |
| 9124 | VIM-AS1      | 1.12 | 1.53E-01 | 2.20E-01 | 416.35   | not significant |
| 9125 | SLC25A28     | 1.12 | 1.24E-02 | 2.39E-02 | 652.39   | not significant |
| 9126 | DUT          | 1.12 | 1.17E-06 | 4.39E-06 | 7000.27  | not significant |
| 9127 | RNF38        | 1.12 | 7.08E-05 | 2.08E-04 | 1949.13  | not significant |
| 9128 | C19orf60     | 1.12 | 7.86E-03 | 1.58E-02 | 668.11   | not significant |
| 9129 | PRR11        | 1.12 | 1.97E-07 | 8.15E-07 | 10500.40 | not significant |
| 9130 | TFE3         | 1.12 | 6.91E-02 | 1.10E-01 | 230.13   | not significant |
| 9131 | BRAF         | 1.12 | 1.77E-02 | 3.28E-02 | 482.74   | not significant |
| 9132 | HLCS         | 1.12 | 1.64E-03 | 3.76E-03 | 1018.73  | not significant |
| 9133 | STX16        | 1.12 | 5.18E-05 | 1.55E-04 | 2989.90  | not significant |
| 9134 | CENPO        | 1.12 | 5.52E-07 | 2.15E-06 | 3806.69  | not significant |
| 9135 | KIAA1919     | 1.12 | 3.55E-02 | 6.13E-02 | 422.03   | not significant |
| 9136 | WDR81        | 1.12 | 1.30E-03 | 3.05E-03 | 1102.11  | not significant |
| 9137 | UBE2V1       | 1.12 | 1.62E-01 | 2.32E-01 | 77.78    | not significant |
| 9138 | TSPAN4       | 1.12 | 1.81E-02 | 3.36E-02 | 528.14   | not significant |
| 9139 | LRRC37BP1    | 1.12 | 5.47E-03 | 1.14E-02 | 767.27   | not significant |
| 9140 | RP2          | 1.13 | 1.45E-01 | 2.11E-01 | 107.18   | not significant |



|      |              |      |          |          |          |                 |
|------|--------------|------|----------|----------|----------|-----------------|
| 9141 | CCL28        | 1.13 | 1.66E-01 | 2.36E-01 | 30.58    | not significant |
| 9142 | EPB41L5      | 1.13 | 4.19E-03 | 8.91E-03 | 868.96   | not significant |
| 9143 | KLHL28       | 1.13 | 7.54E-03 | 1.52E-02 | 675.90   | not significant |
| 9144 | SMKR1        | 1.13 | 1.50E-01 | 2.16E-01 | 22.77    | not significant |
| 9145 | NISCH        | 1.13 | 9.60E-05 | 2.77E-04 | 4822.15  | not significant |
| 9146 | ZCHC3        | 1.13 | 1.36E-05 | 4.45E-05 | 3057.31  | not significant |
| 9147 | ARHGAP35     | 1.13 | 4.46E-06 | 1.55E-05 | 3839.80  | not significant |
| 9148 | C11orf30     | 1.13 | 3.63E-04 | 9.43E-04 | 2021.04  | not significant |
| 9149 | VPS52        | 1.13 | 8.63E-03 | 1.72E-02 | 635.02   | not significant |
| 9150 | GRAP2        | 1.13 | 1.09E-07 | 4.65E-07 | 7496.57  | not significant |
| 9151 | SH2B1        | 1.13 | 5.86E-02 | 9.55E-02 | 2177.55  | not significant |
| 9152 | B4GALT3      | 1.13 | 1.31E-03 | 3.08E-03 | 1102.75  | not significant |
| 9153 | ACAA1        | 1.13 | 3.43E-05 | 1.06E-04 | 2210.40  | not significant |
| 9154 | RUNX3        | 1.13 | 7.74E-05 | 2.26E-04 | 1929.38  | not significant |
| 9155 | SLC17A5      | 1.13 | 4.98E-02 | 8.29E-02 | 305.76   | not significant |
| 9156 | VAMP1        | 1.13 | 1.46E-01 | 2.12E-01 | 1291.37  | not significant |
| 9157 | ALDH8A1      | 1.13 | 1.68E-01 | 2.39E-01 | 35.87    | not significant |
| 9158 | ARHGEF19     | 1.13 | 8.04E-02 | 1.26E-01 | 192.41   | not significant |
| 9159 | NDUFB11      | 1.13 | 3.55E-03 | 7.67E-03 | 829.44   | not significant |
| 9160 | MZT2A        | 1.13 | 2.90E-04 | 7.67E-04 | 2390.51  | not significant |
| 9161 | CLMN         | 1.13 | 1.69E-01 | 2.40E-01 | 37.86    | not significant |
| 9162 | EPHB6        | 1.13 | 1.37E-05 | 4.45E-05 | 3362.19  | not significant |
| 9163 | ARMC5        | 1.13 | 1.03E-02 | 2.02E-02 | 615.38   | not significant |
| 9164 | ATF7IP       | 1.13 | 9.37E-05 | 2.70E-04 | 3033.05  | not significant |
| 9165 | AGO1         | 1.13 | 1.35E-05 | 4.41E-05 | 3088.01  | not significant |
| 9166 | ZBTB5        | 1.13 | 2.18E-04 | 5.91E-04 | 1542.19  | not significant |
| 9167 | ZNF780B      | 1.13 | 1.45E-01 | 2.10E-01 | 677.71   | not significant |
| 9168 | NR1H2        | 1.13 | 1.85E-04 | 5.09E-04 | 1778.26  | not significant |
| 9169 | UQCRB        | 1.13 | 2.32E-02 | 4.18E-02 | 5322.44  | not significant |
| 9170 | FAM92A1      | 1.13 | 1.62E-02 | 3.03E-02 | 478.54   | not significant |
| 9171 | UBXN8        | 1.13 | 1.55E-02 | 2.91E-02 | 497.74   | not significant |
| 9172 | LOC100507577 | 1.13 | 1.60E-01 | 2.29E-01 | 73.10    | not significant |
| 9173 | INO80B       | 1.13 | 1.17E-01 | 1.75E-01 | 14.85    | not significant |
| 9174 | SLC15A4      | 1.13 | 2.20E-03 | 4.94E-03 | 963.21   | not significant |
| 9175 | MCM9         | 1.13 | 8.69E-04 | 2.10E-03 | 1089.66  | not significant |
| 9176 | JMJD1C-AS1   | 1.13 | 6.94E-02 | 1.11E-01 | 8.84     | not significant |
| 9177 | AGPAT4       | 1.13 | 1.40E-01 | 2.04E-01 | 97.57    | not significant |
| 9178 | PHF12        | 1.13 | 1.37E-05 | 4.48E-05 | 2521.25  | not significant |
| 9179 | MAPKAPK2     | 1.13 | 3.53E-03 | 7.63E-03 | 777.55   | not significant |
| 9180 | POLE         | 1.13 | 4.98E-02 | 8.28E-02 | 12005.19 | not significant |
| 9181 | KDM5A        | 1.13 | 9.29E-08 | 3.99E-07 | 5090.96  | not significant |
| 9182 | QSOX2        | 1.13 | 2.35E-03 | 5.24E-03 | 1048.34  | not significant |
| 9183 | C1orf198     | 1.13 | 3.36E-03 | 7.31E-03 | 1038.14  | not significant |
| 9184 | SLC35A1      | 1.13 | 8.80E-03 | 1.75E-02 | 584.08   | not significant |
| 9185 | GIT2         | 1.13 | 5.39E-07 | 2.10E-06 | 3774.75  | not significant |
| 9186 | ETHE1        | 1.13 | 2.25E-02 | 4.09E-02 | 426.70   | not significant |
| 9187 | GPBP1L1      | 1.13 | 3.18E-09 | 1.60E-08 | 6268.24  | not significant |
| 9188 | NBN          | 1.13 | 9.90E-06 | 3.29E-05 | 3531.68  | not significant |
| 9189 | TSNARE1      | 1.13 | 3.22E-02 | 5.63E-02 | 360.19   | not significant |
| 9190 | TRIM59       | 1.13 | 4.34E-03 | 9.21E-03 | 807.80   | not significant |
| 9191 | FLJ27354     | 1.13 | 1.32E-01 | 1.93E-01 | 18.11    | not significant |
| 9192 | LINC00618    | 1.13 | 1.23E-01 | 1.82E-01 | 16.24    | not significant |
| 9193 | TTC19        | 1.13 | 1.34E-05 | 4.39E-05 | 2295.72  | not significant |
| 9194 | C1QTNF3      | 1.13 | 7.13E-02 | 1.13E-01 | 217.18   | not significant |
| 9195 | ZZEF1        | 1.13 | 2.58E-05 | 8.10E-05 | 3773.40  | not significant |
| 9196 | PTCD1        | 1.13 | 7.06E-02 | 1.12E-01 | 9.38     | not significant |
| 9197 | LAG3         | 1.13 | 1.03E-01 | 1.57E-01 | 13.05    | not significant |
| 9198 | ABHD11       | 1.13 | 1.59E-01 | 2.27E-01 | 63.52    | not significant |
| 9199 | RBM48        | 1.13 | 8.94E-03 | 1.77E-02 | 573.69   | not significant |
| 9200 | RCOR3        | 1.13 | 4.75E-04 | 1.21E-03 | 1251.86  | not significant |
| 9201 | FRAT2        | 1.13 | 3.63E-02 | 6.25E-02 | 370.02   | not significant |
| 9202 | FURIN        | 1.13 | 2.51E-03 | 5.56E-03 | 1056.88  | not significant |
| 9203 | ZRANB1       | 1.13 | 8.82E-05 | 2.55E-04 | 1731.73  | not significant |
| 9204 | CTBS         | 1.13 | 4.94E-03 | 1.04E-02 | 755.99   | not significant |
| 9205 | BTBD9        | 1.13 | 2.54E-02 | 4.56E-02 | 403.61   | not significant |
| 9206 | EFNA4        | 1.13 | 1.39E-01 | 2.04E-01 | 92.20    | not significant |
| 9207 | RUNDC1       | 1.13 | 2.09E-03 | 4.71E-03 | 863.40   | not significant |
| 9208 | SCARF2       | 1.13 | 1.60E-01 | 2.29E-01 | 31.83    | not significant |
| 9209 | LOC100506159 | 1.13 | 1.53E-01 | 2.20E-01 | 80.94    | not significant |
| 9210 | RNF146       | 1.13 | 1.48E-02 | 2.79E-02 | 512.16   | not significant |
| 9211 | MTG1         | 1.13 | 5.35E-04 | 1.35E-03 | 1277.02  | not significant |
| 9212 | OSBPL2       | 1.13 | 1.71E-03 | 3.92E-03 | 1034.17  | not significant |
| 9213 | KDM8         | 1.13 | 6.41E-02 | 1.03E-01 | 225.37   | not significant |
| 9214 | TCF12        | 1.13 | 9.45E-09 | 4.55E-08 | 7035.75  | not significant |
| 9215 | RPARP-AS1    | 1.13 | 1.59E-02 | 2.97E-02 | 484.12   | not significant |
| 9216 | PUSL1        | 1.13 | 5.17E-03 | 1.08E-02 | 741.05   | not significant |
| 9217 | MEF2BNC      | 1.13 | 9.23E-02 | 1.42E-01 | 154.21   | not significant |
| 9218 | HLTF         | 1.13 | 3.02E-08 | 1.37E-07 | 5064.07  | not significant |
| 9219 | FBXW8        | 1.13 | 3.00E-04 | 7.92E-04 | 1278.91  | not significant |
| 9220 | TRIM24       | 1.13 | 6.43E-08 | 2.81E-07 | 4597.83  | not significant |
| 9221 | PABPC4       | 1.13 | 3.01E-09 | 1.52E-08 | 7261.74  | not significant |
| 9222 | LINC01012    | 1.13 | 1.42E-01 | 2.07E-01 | 21.73    | not significant |
| 9223 | TBC1D8       | 1.13 | 1.05E-02 | 2.06E-02 | 556.28   | not significant |
| 9224 | AKR7A3       | 1.13 | 1.10E-01 | 1.65E-01 | 15.05    | not significant |
| 9225 | LSM14B       | 1.13 | 1.98E-05 | 6.30E-05 | 2080.43  | not significant |
| 9226 | FAM89A       | 1.13 | 7.38E-02 | 1.17E-01 | 198.45   | not significant |
| 9227 | CYP20A1      | 1.13 | 6.50E-04 | 1.61E-03 | 1159.02  | not significant |
| 9228 | SNX16        | 1.13 | 4.27E-02 | 7.22E-02 | 336.63   | not significant |

|      |              |      |          |          |          |                 |
|------|--------------|------|----------|----------|----------|-----------------|
| 9229 | RGP1         | 1.13 | 2.43E-02 | 4.38E-02 | 391.10   | not significant |
| 9230 | SPAG16       | 1.13 | 2.06E-02 | 3.76E-02 | 473.22   | not significant |
| 9231 | EHD2         | 1.13 | 1.12E-03 | 2.66E-03 | 980.00   | not significant |
| 9232 | EMBP1        | 1.13 | 9.26E-02 | 1.43E-01 | 12.03    | not significant |
| 9233 | WTAP         | 1.13 | 6.14E-07 | 2.38E-06 | 4375.42  | not significant |
| 9234 | ZFY          | 1.13 | 1.93E-03 | 4.37E-03 | 993.73   | not significant |
| 9235 | PKMYT1       | 1.13 | 1.35E-05 | 4.41E-05 | 4624.67  | not significant |
| 9236 | SPPL2A       | 1.13 | 9.61E-04 | 2.30E-03 | 998.09   | not significant |
| 9237 | FANCL        | 1.13 | 7.69E-04 | 1.87E-03 | 1083.29  | not significant |
| 9238 | FAM102A      | 1.13 | 4.07E-04 | 1.05E-03 | 1472.99  | not significant |
| 9239 | USP11        | 1.13 | 5.58E-08 | 2.47E-07 | 5010.13  | not significant |
| 9240 | SPAG4        | 1.13 | 1.51E-01 | 2.17E-01 | 27.92    | not significant |
| 9241 | DENND6A      | 1.13 | 2.19E-05 | 6.92E-05 | 1885.36  | not significant |
| 9242 | TSTD1        | 1.13 | 1.04E-02 | 2.04E-02 | 584.89   | not significant |
| 9243 | MGRN1        | 1.13 | 1.60E-05 | 5.18E-05 | 2224.44  | not significant |
| 9244 | ANKRD39      | 1.13 | 2.37E-02 | 4.28E-02 | 407.38   | not significant |
| 9245 | CNOT10       | 1.13 | 5.76E-06 | 1.97E-05 | 2385.98  | not significant |
| 9246 | C14orf93     | 1.13 | 1.14E-01 | 1.71E-01 | 137.51   | not significant |
| 9247 | MLXIP        | 1.13 | 3.73E-06 | 1.31E-05 | 4679.25  | not significant |
| 9248 | HNRNPLL      | 1.13 | 6.68E-05 | 1.97E-04 | 3895.29  | not significant |
| 9249 | GBA          | 1.13 | 4.68E-02 | 7.84E-02 | 292.66   | not significant |
| 9250 | ZNF91        | 1.13 | 2.80E-04 | 7.42E-04 | 1413.62  | not significant |
| 9251 | SAAL1        | 1.13 | 6.29E-05 | 1.87E-04 | 1930.11  | not significant |
| 9252 | ANKRD50      | 1.13 | 3.46E-04 | 9.03E-04 | 1267.01  | not significant |
| 9253 | ZNF655       | 1.13 | 2.23E-05 | 7.06E-05 | 4003.78  | not significant |
| 9254 | FANCG        | 1.13 | 3.52E-06 | 1.24E-05 | 3041.57  | not significant |
| 9255 | LOC283070    | 1.13 | 4.79E-03 | 1.01E-02 | 657.47   | not significant |
| 9256 | FNBP1L       | 1.13 | 2.06E-04 | 5.61E-04 | 1440.01  | not significant |
| 9257 | KLHL20       | 1.13 | 1.20E-02 | 2.32E-02 | 497.65   | not significant |
| 9258 | CSRNP2       | 1.13 | 9.99E-05 | 2.87E-04 | 1774.44  | not significant |
| 9259 | LOC101926963 | 1.13 | 8.28E-02 | 1.29E-01 | 189.88   | not significant |
| 9260 | CNPY4        | 1.13 | 1.43E-02 | 2.71E-02 | 535.94   | not significant |
| 9261 | MIRLET7BHG   | 1.13 | 1.40E-01 | 2.04E-01 | 25.09    | not significant |
| 9262 | ERBB2IP      | 1.13 | 8.04E-08 | 3.47E-07 | 6401.29  | not significant |
| 9263 | DVL1         | 1.13 | 2.34E-04 | 6.30E-04 | 1505.67  | not significant |
| 9264 | RASSF7       | 1.13 | 2.62E-02 | 4.68E-02 | 380.31   | not significant |
| 9265 | ZNF773       | 1.13 | 5.16E-02 | 8.55E-02 | 248.57   | not significant |
| 9266 | PAFAH1B3     | 1.13 | 1.88E-05 | 6.02E-05 | 2094.33  | not significant |
| 9267 | SORT1        | 1.13 | 1.02E-07 | 4.36E-07 | 4120.00  | not significant |
| 9268 | ITGB2-AS1    | 1.13 | 9.78E-02 | 1.50E-01 | 187.18   | not significant |
| 9269 | TNKS         | 1.13 | 2.38E-04 | 6.39E-04 | 2322.27  | not significant |
| 9270 | ERGIC1       | 1.13 | 9.47E-10 | 5.01E-09 | 16063.80 | not significant |
| 9271 | LOC648987    | 1.13 | 4.71E-03 | 9.94E-03 | 654.50   | not significant |
| 9272 | SPAG9        | 1.13 | 1.14E-05 | 3.75E-05 | 2172.09  | not significant |
| 9273 | PXMP4        | 1.13 | 2.37E-03 | 5.29E-03 | 892.43   | not significant |
| 9274 | ARID1B       | 1.13 | 4.40E-07 | 1.74E-06 | 4716.25  | not significant |
| 9275 | WBP2         | 1.13 | 2.26E-07 | 9.28E-07 | 4762.46  | not significant |
| 9276 | C9orf163     | 1.13 | 5.28E-02 | 8.72E-02 | 8.77     | not significant |
| 9277 | PRSS57       | 1.13 | 1.52E-01 | 2.19E-01 | 57.64    | not significant |
| 9278 | CHRNE        | 1.13 | 5.07E-02 | 8.41E-02 | 7.70     | not significant |
| 9279 | STARD5       | 1.13 | 1.44E-01 | 2.09E-01 | 80.57    | not significant |
| 9280 | SPNS1        | 1.13 | 3.55E-04 | 9.24E-04 | 1415.84  | not significant |
| 9281 | EXOC4        | 1.13 | 4.45E-07 | 1.76E-06 | 3696.64  | not significant |
| 9282 | THTPA        | 1.13 | 3.86E-02 | 6.59E-02 | 283.99   | not significant |
| 9283 | SLFN12       | 1.13 | 1.04E-02 | 2.03E-02 | 540.18   | not significant |
| 9284 | NCOA4        | 1.13 | 1.44E-04 | 4.04E-04 | 1535.00  | not significant |
| 9285 | ZNF501       | 1.13 | 9.80E-02 | 1.50E-01 | 147.85   | not significant |
| 9286 | C1orf145     | 1.13 | 9.98E-02 | 1.52E-01 | 14.84    | not significant |
| 9287 | ERO1LB       | 1.13 | 1.08E-01 | 1.63E-01 | 137.78   | not significant |
| 9288 | WBP1L        | 1.13 | 3.80E-05 | 1.16E-04 | 2042.46  | not significant |
| 9289 | AZIN2        | 1.13 | 5.88E-02 | 9.58E-02 | 214.85   | not significant |
| 9290 | PPP2R2D      | 1.13 | 2.23E-02 | 4.05E-02 | 371.48   | not significant |
| 9291 | PLEKHJ1      | 1.13 | 7.00E-05 | 2.06E-04 | 2909.41  | not significant |
| 9292 | GAS7         | 1.13 | 4.05E-07 | 1.61E-06 | 5219.52  | not significant |
| 9293 | LOC101929698 | 1.13 | 1.31E-01 | 1.92E-01 | 20.13    | not significant |
| 9294 | PMS2P3       | 1.13 | 9.57E-02 | 1.47E-01 | 138.86   | not significant |
| 9295 | NIT1         | 1.13 | 1.32E-03 | 3.08E-03 | 926.75   | not significant |
| 9296 | GRHPR        | 1.13 | 7.05E-04 | 1.73E-03 | 1427.86  | not significant |
| 9297 | BAD          | 1.13 | 9.09E-04 | 2.19E-03 | 1214.28  | not significant |
| 9298 | PPIL4        | 1.13 | 3.97E-03 | 8.50E-03 | 784.89   | not significant |
| 9299 | DHRS12       | 1.13 | 1.40E-01 | 2.05E-01 | 75.23    | not significant |
| 9300 | DMXL1        | 1.13 | 3.31E-05 | 1.02E-04 | 2796.52  | not significant |
| 9301 | C4orf3       | 1.13 | 4.71E-04 | 1.20E-03 | 2205.72  | not significant |
| 9302 | AXIN1        | 1.13 | 7.46E-05 | 2.18E-04 | 1531.63  | not significant |
| 9303 | SPICE1       | 1.13 | 5.23E-03 | 1.09E-02 | 804.63   | not significant |
| 9304 | FAM57B       | 1.13 | 1.23E-01 | 1.83E-01 | 94.54    | not significant |
| 9305 | GID8         | 1.13 | 8.67E-07 | 3.31E-06 | 3857.99  | not significant |
| 9306 | HSF2         | 1.13 | 2.14E-04 | 5.82E-04 | 1744.41  | not significant |
| 9307 | EIF5A2       | 1.13 | 1.85E-03 | 4.20E-03 | 812.58   | not significant |
| 9308 | FAM65B       | 1.13 | 4.50E-07 | 1.78E-06 | 3075.14  | not significant |
| 9309 | BLOC1S6      | 1.13 | 5.95E-06 | 2.04E-05 | 3376.57  | not significant |
| 9310 | MED15        | 1.13 | 7.92E-06 | 2.67E-05 | 2154.58  | not significant |
| 9311 | IL18BP       | 1.13 | 2.34E-02 | 4.22E-02 | 441.08   | not significant |
| 9312 | CHFR         | 1.13 | 1.47E-07 | 6.18E-07 | 6160.33  | not significant |
| 9313 | MMGT1        | 1.13 | 1.44E-01 | 2.09E-01 | 63.18    | not significant |
| 9314 | HOXB3        | 1.13 | 3.53E-02 | 6.10E-02 | 359.22   | not significant |
| 9315 | ITGA6        | 1.13 | 1.62E-03 | 3.72E-03 | 890.49   | not significant |
| 9316 | ATP6V1G1     | 1.13 | 7.19E-06 | 2.44E-05 | 2530.76  | not significant |

|      |              |      |          |          |          |                 |
|------|--------------|------|----------|----------|----------|-----------------|
| 9317 | CDKN2C       | 1.13 | 1.92E-06 | 7.04E-06 | 3257.35  | not significant |
| 9318 | SLC2A1       | 1.13 | 2.73E-04 | 7.26E-04 | 1239.85  | not significant |
| 9319 | ATF7         | 1.13 | 6.68E-05 | 1.97E-04 | 1747.49  | not significant |
| 9320 | ACYP2        | 1.13 | 1.01E-01 | 1.55E-01 | 122.85   | not significant |
| 9321 | ISL2         | 1.13 | 8.26E-02 | 1.29E-01 | 161.44   | not significant |
| 9322 | WHSC1L1      | 1.13 | 7.49E-10 | 4.01E-09 | 5795.87  | not significant |
| 9323 | CLK2         | 1.13 | 2.97E-03 | 6.51E-03 | 894.11   | not significant |
| 9324 | HERC2P9      | 1.13 | 8.70E-02 | 1.35E-01 | 161.97   | not significant |
| 9325 | UBASH3A      | 1.14 | 7.10E-04 | 1.74E-03 | 1128.06  | not significant |
| 9326 | SLC15A2      | 1.14 | 1.51E-01 | 2.18E-01 | 47.29    | not significant |
| 9327 | SKOR1        | 1.14 | 1.25E-01 | 1.86E-01 | 22.85    | not significant |
| 9328 | ATF4         | 1.14 | 1.67E-08 | 7.78E-08 | 16503.44 | not significant |
| 9329 | MOGS         | 1.14 | 2.66E-04 | 7.08E-04 | 1839.52  | not significant |
| 9330 | RWDD4        | 1.14 | 4.66E-03 | 9.84E-03 | 627.28   | not significant |
| 9331 | ANKRD37      | 1.14 | 1.37E-01 | 2.01E-01 | 70.08    | not significant |
| 9332 | PIGB         | 1.14 | 2.92E-02 | 5.15E-02 | 311.92   | not significant |
| 9333 | NPAS2        | 1.14 | 7.45E-04 | 1.82E-03 | 1074.23  | not significant |
| 9334 | CENPC        | 1.14 | 7.72E-05 | 2.25E-04 | 1590.68  | not significant |
| 9335 | HGS          | 1.14 | 4.84E-06 | 1.68E-05 | 3585.75  | not significant |
| 9336 | RPS10        | 1.14 | 6.96E-02 | 1.11E-01 | 195.12   | not significant |
| 9337 | ZNF610       | 1.14 | 2.46E-02 | 4.43E-02 | 341.60   | not significant |
| 9338 | SARNP        | 1.14 | 2.01E-06 | 7.35E-06 | 2851.81  | not significant |
| 9339 | DPH5         | 1.14 | 1.21E-04 | 3.41E-04 | 1579.81  | not significant |
| 9340 | ADCK4        | 1.14 | 5.29E-03 | 1.10E-02 | 585.35   | not significant |
| 9341 | UFC1         | 1.14 | 2.62E-05 | 8.20E-05 | 2098.88  | not significant |
| 9342 | LOC101926943 | 1.14 | 8.77E-02 | 1.36E-01 | 13.27    | not significant |
| 9343 | ARMCX2       | 1.14 | 1.00E-01 | 1.53E-01 | 15.21    | not significant |
| 9344 | ATG9A        | 1.14 | 2.26E-04 | 6.11E-04 | 1236.76  | not significant |
| 9345 | BOD1         | 1.14 | 1.39E-03 | 3.24E-03 | 829.05   | not significant |
| 9346 | CDC14A       | 1.14 | 1.72E-02 | 3.21E-02 | 462.53   | not significant |
| 9347 | TRPC4AP      | 1.14 | 1.68E-08 | 7.85E-08 | 5303.91  | not significant |
| 9348 | GCH1         | 1.14 | 1.48E-06 | 5.50E-06 | 2761.08  | not significant |
| 9349 | LZTS3        | 1.14 | 1.01E-01 | 1.54E-01 | 16.02    | not significant |
| 9350 | MIR600HG     | 1.14 | 2.81E-02 | 4.97E-02 | 304.49   | not significant |
| 9351 | DDX60        | 1.14 | 1.21E-04 | 3.42E-04 | 1438.06  | not significant |
| 9352 | RNF167       | 1.14 | 1.02E-06 | 3.86E-06 | 3973.98  | not significant |
| 9353 | LOC101928378 | 1.14 | 8.88E-02 | 1.38E-01 | 178.99   | not significant |
| 9354 | SPTBN1       | 1.14 | 2.95E-06 | 1.05E-05 | 19501.93 | not significant |
| 9355 | CCDC73       | 1.14 | 1.11E-01 | 1.67E-01 | 23.13    | not significant |
| 9356 | C5orf30      | 1.14 | 1.45E-01 | 2.10E-01 | 41.86    | not significant |
| 9357 | MCOLN1       | 1.14 | 7.28E-03 | 1.47E-02 | 558.08   | not significant |
| 9358 | GOLT1B       | 1.14 | 2.33E-04 | 6.29E-04 | 1325.12  | not significant |
| 9359 | RILPL1       | 1.14 | 8.29E-02 | 1.30E-01 | 150.62   | not significant |
| 9360 | PRKD3        | 1.14 | 1.40E-07 | 5.89E-07 | 3206.55  | not significant |
| 9361 | ZDHHC21      | 1.14 | 3.05E-02 | 5.35E-02 | 313.90   | not significant |
| 9362 | KIAA0907     | 1.14 | 3.02E-02 | 5.31E-02 | 2601.22  | not significant |
| 9363 | BTF3L4       | 1.14 | 3.52E-06 | 1.24E-05 | 2691.86  | not significant |
| 9364 | MORN1        | 1.14 | 1.39E-01 | 2.04E-01 | 57.26    | not significant |
| 9365 | SUMF2        | 1.14 | 7.21E-09 | 3.51E-08 | 5415.43  | not significant |
| 9366 | NRDE2        | 1.14 | 3.37E-03 | 7.31E-03 | 674.66   | not significant |
| 9367 | KCNC4        | 1.14 | 1.37E-02 | 2.62E-02 | 417.33   | not significant |
| 9368 | ZNF227       | 1.14 | 1.05E-03 | 2.50E-03 | 1094.67  | not significant |
| 9369 | ULK1         | 1.14 | 3.67E-06 | 1.29E-05 | 3824.26  | not significant |
| 9370 | PRR12        | 1.14 | 8.45E-06 | 2.83E-05 | 3143.85  | not significant |
| 9371 | SPATA25      | 1.14 | 1.09E-01 | 1.65E-01 | 17.10    | not significant |
| 9372 | WDR34        | 1.14 | 8.34E-07 | 3.18E-06 | 3076.73  | not significant |
| 9373 | DOCK8        | 1.14 | 7.25E-10 | 3.89E-09 | 14249.09 | not significant |
| 9374 | NFKBID       | 1.14 | 5.66E-02 | 9.26E-02 | 207.17   | not significant |
| 9375 | DYRK1A       | 1.14 | 5.64E-08 | 2.49E-07 | 3686.52  | not significant |
| 9376 | RECK         | 1.14 | 8.34E-04 | 2.02E-03 | 968.85   | not significant |
| 9377 | MGAT4B       | 1.14 | 1.96E-04 | 5.34E-04 | 1317.59  | not significant |
| 9378 | CCDC88C      | 1.14 | 2.48E-08 | 1.14E-07 | 5165.99  | not significant |
| 9379 | HADHB        | 1.14 | 2.33E-06 | 8.42E-06 | 2712.46  | not significant |
| 9380 | SPG11        | 1.14 | 8.90E-06 | 2.98E-05 | 1850.07  | not significant |
| 9381 | C15orf41     | 1.14 | 1.09E-02 | 2.12E-02 | 454.07   | not significant |
| 9382 | CHPF2        | 1.14 | 2.55E-04 | 6.83E-04 | 1404.21  | not significant |
| 9383 | BLCAP        | 1.14 | 1.32E-04 | 3.72E-04 | 1650.42  | not significant |
| 9384 | ZNF862       | 1.14 | 4.99E-03 | 1.05E-02 | 597.01   | not significant |
| 9385 | CEP120       | 1.14 | 5.13E-05 | 1.54E-04 | 1461.12  | not significant |
| 9386 | TTN-AS1      | 1.14 | 3.06E-02 | 5.38E-02 | 294.42   | not significant |
| 9387 | GXYLT2       | 1.14 | 1.02E-04 | 2.92E-04 | 1382.95  | not significant |
| 9388 | SNAPC2       | 1.14 | 4.06E-03 | 8.68E-03 | 640.45   | not significant |
| 9389 | COMMD3       | 1.14 | 1.24E-03 | 2.92E-03 | 864.74   | not significant |
| 9390 | SMYD4        | 1.14 | 4.27E-05 | 1.30E-04 | 1493.87  | not significant |
| 9391 | ZNF606       | 1.14 | 1.15E-02 | 2.23E-02 | 456.48   | not significant |
| 9392 | ZNF273       | 1.14 | 3.94E-05 | 1.20E-04 | 1614.76  | not significant |
| 9393 | PABPC4L      | 1.14 | 2.84E-03 | 6.25E-03 | 726.14   | not significant |
| 9394 | DNAJC9       | 1.14 | 3.45E-07 | 1.39E-06 | 5557.11  | not significant |
| 9395 | ASH1L        | 1.14 | 2.12E-02 | 3.87E-02 | 1917.18  | not significant |
| 9396 | ZNF527       | 1.14 | 1.22E-02 | 2.34E-02 | 453.18   | not significant |
| 9397 | ADAMTS10     | 1.14 | 1.21E-02 | 2.32E-02 | 438.17   | not significant |
| 9398 | C20orf197    | 1.14 | 1.92E-02 | 3.54E-02 | 380.93   | not significant |
| 9399 | PGPEP1L      | 1.14 | 1.40E-01 | 2.04E-01 | 36.15    | not significant |
| 9400 | SYNRG        | 1.14 | 1.76E-07 | 7.30E-07 | 3811.33  | not significant |
| 9401 | WASH7P       | 1.14 | 1.35E-01 | 1.98E-01 | 29.79    | not significant |
| 9402 | FAM160B2     | 1.14 | 3.73E-04 | 9.67E-04 | 1560.89  | not significant |
| 9403 | NDFIP1       | 1.14 | 1.41E-09 | 7.34E-09 | 6156.46  | not significant |
| 9404 | PRDM15       | 1.14 | 7.10E-03 | 1.44E-02 | 547.62   | not significant |

|      |              |      |          |          |          |                 |
|------|--------------|------|----------|----------|----------|-----------------|
| 9405 | TRAPPC6A     | 1.14 | 2.92E-02 | 5.16E-02 | 447.21   | not significant |
| 9406 | ZFP36L2      | 1.14 | 6.42E-08 | 2.80E-07 | 3609.26  | not significant |
| 9407 | RAD51D       | 1.14 | 2.04E-03 | 4.59E-03 | 811.12   | not significant |
| 9408 | HS2ST1       | 1.14 | 3.44E-08 | 1.56E-07 | 3909.35  | not significant |
| 9409 | RPL13A       | 1.14 | 3.19E-09 | 1.61E-08 | 7062.22  | not significant |
| 9410 | POLR3C       | 1.14 | 6.63E-03 | 1.35E-02 | 556.61   | not significant |
| 9411 | CCDC120      | 1.14 | 9.89E-02 | 1.51E-01 | 110.73   | not significant |
| 9412 | FAM8A1       | 1.14 | 2.13E-03 | 4.79E-03 | 724.15   | not significant |
| 9413 | FUZ          | 1.14 | 6.25E-04 | 1.55E-03 | 998.63   | not significant |
| 9414 | TMEM170B     | 1.14 | 5.69E-04 | 1.43E-03 | 1279.73  | not significant |
| 9415 | TAB3         | 1.14 | 1.34E-05 | 4.39E-05 | 1985.65  | not significant |
| 9416 | ZNF331       | 1.14 | 3.39E-03 | 7.35E-03 | 1022.29  | not significant |
| 9417 | RELT         | 1.14 | 1.11E-03 | 2.63E-03 | 888.94   | not significant |
| 9418 | CGRRF1       | 1.14 | 3.94E-02 | 6.71E-02 | 250.97   | not significant |
| 9419 | ACAP3        | 1.14 | 3.92E-04 | 1.01E-03 | 1702.96  | not significant |
| 9420 | TAF1C        | 1.14 | 4.59E-02 | 7.71E-02 | 2391.65  | not significant |
| 9421 | NCK2         | 1.14 | 2.01E-04 | 5.49E-04 | 1169.33  | not significant |
| 9422 | VPS39        | 1.14 | 4.46E-06 | 1.55E-05 | 2259.17  | not significant |
| 9423 | C14orf159    | 1.14 | 9.78E-06 | 3.25E-05 | 2017.13  | not significant |
| 9424 | ANKLE2       | 1.14 | 2.98E-10 | 1.67E-09 | 6043.62  | not significant |
| 9425 | MIDN         | 1.14 | 4.20E-06 | 1.47E-05 | 2667.32  | not significant |
| 9426 | DNASE2       | 1.14 | 9.23E-04 | 2.22E-03 | 1251.96  | not significant |
| 9427 | POLI         | 1.14 | 1.76E-02 | 3.26E-02 | 406.85   | not significant |
| 9428 | ZFP1         | 1.14 | 1.95E-05 | 6.21E-05 | 1754.92  | not significant |
| 9429 | IRS1         | 1.14 | 1.05E-02 | 2.05E-02 | 453.93   | not significant |
| 9430 | KAT6B        | 1.14 | 3.02E-06 | 1.07E-05 | 2985.84  | not significant |
| 9431 | L3MBTL3      | 1.14 | 8.96E-04 | 2.16E-03 | 877.29   | not significant |
| 9432 | SLC38A7      | 1.14 | 1.03E-02 | 2.03E-02 | 449.23   | not significant |
| 9433 | YES1         | 1.14 | 2.63E-03 | 5.82E-03 | 707.56   | not significant |
| 9434 | CBR3         | 1.14 | 1.19E-01 | 1.77E-01 | 77.27    | not significant |
| 9435 | PTPRE        | 1.14 | 7.08E-03 | 1.44E-02 | 543.56   | not significant |
| 9436 | GGCX         | 1.14 | 4.16E-03 | 8.85E-03 | 623.65   | not significant |
| 9437 | LRP11        | 1.14 | 9.64E-07 | 3.66E-06 | 2975.21  | not significant |
| 9438 | DCTD         | 1.14 | 3.24E-07 | 1.30E-06 | 2958.51  | not significant |
| 9439 | SSFA2        | 1.14 | 2.79E-03 | 6.15E-03 | 693.97   | not significant |
| 9440 | RPSA         | 1.14 | 2.20E-06 | 7.98E-06 | 24020.26 | not significant |
| 9441 | ZNF624       | 1.14 | 3.37E-02 | 5.85E-02 | 288.07   | not significant |
| 9442 | ZNF558       | 1.14 | 8.18E-02 | 1.28E-01 | 135.98   | not significant |
| 9443 | RNF19B       | 1.14 | 1.41E-03 | 3.28E-03 | 801.11   | not significant |
| 9444 | CSNK1E       | 1.14 | 1.11E-06 | 4.19E-06 | 2489.77  | not significant |
| 9445 | EOGT         | 1.14 | 9.92E-02 | 1.51E-01 | 104.51   | not significant |
| 9446 | FAM111B      | 1.14 | 1.97E-04 | 5.36E-04 | 1132.00  | not significant |
| 9447 | C21orf91     | 1.14 | 5.47E-06 | 1.88E-05 | 2066.06  | not significant |
| 9448 | MVB12A       | 1.14 | 9.54E-03 | 1.88E-02 | 432.12   | not significant |
| 9449 | FAM76A       | 1.14 | 3.90E-03 | 8.36E-03 | 651.66   | not significant |
| 9450 | KHDRBS1      | 1.14 | 5.20E-10 | 2.85E-09 | 19878.15 | not significant |
| 9451 | ZNF818P      | 1.14 | 2.09E-02 | 3.81E-02 | 331.47   | not significant |
| 9452 | BCL2         | 1.14 | 3.11E-08 | 1.41E-07 | 4217.45  | not significant |
| 9453 | IFI27L2      | 1.14 | 3.49E-02 | 6.03E-02 | 255.34   | not significant |
| 9454 | AGPAT5       | 1.14 | 7.04E-10 | 3.79E-09 | 5796.48  | not significant |
| 9455 | C17orf62     | 1.14 | 4.49E-09 | 2.23E-08 | 5889.22  | not significant |
| 9456 | TAB1         | 1.14 | 9.18E-05 | 2.65E-04 | 1309.42  | not significant |
| 9457 | PFDN5        | 1.14 | 2.95E-06 | 1.05E-05 | 4864.67  | not significant |
| 9458 | TCTN3        | 1.14 | 1.72E-04 | 4.75E-04 | 1116.15  | not significant |
| 9459 | LRRC34       | 1.14 | 3.54E-02 | 6.11E-02 | 254.27   | not significant |
| 9460 | PHACTR4      | 1.14 | 5.74E-07 | 2.23E-06 | 2381.17  | not significant |
| 9461 | RBFA         | 1.14 | 5.30E-04 | 1.34E-03 | 1001.81  | not significant |
| 9462 | RICTOR       | 1.14 | 3.25E-02 | 5.67E-02 | 1872.21  | not significant |
| 9463 | CRY2         | 1.14 | 9.73E-04 | 2.33E-03 | 849.29   | not significant |
| 9464 | PMEPA1       | 1.14 | 2.61E-05 | 8.18E-05 | 2138.05  | not significant |
| 9465 | PHF7         | 1.14 | 1.68E-03 | 3.84E-03 | 785.87   | not significant |
| 9466 | ZNF675       | 1.14 | 8.89E-04 | 2.15E-03 | 900.49   | not significant |
| 9467 | CCDC85B      | 1.14 | 9.36E-04 | 2.25E-03 | 1073.33  | not significant |
| 9468 | LZTR1        | 1.14 | 6.30E-05 | 1.87E-04 | 1634.43  | not significant |
| 9469 | RTN3         | 1.14 | 2.38E-08 | 1.10E-07 | 8112.62  | not significant |
| 9470 | DIP2A        | 1.14 | 3.41E-04 | 8.91E-04 | 1356.40  | not significant |
| 9471 | GALC         | 1.14 | 1.39E-02 | 2.65E-02 | 367.16   | not significant |
| 9472 | ZNF768       | 1.14 | 6.00E-03 | 1.24E-02 | 487.19   | not significant |
| 9473 | ZNF419       | 1.14 | 2.16E-02 | 3.92E-02 | 310.85   | not significant |
| 9474 | DOCK5        | 1.14 | 8.98E-03 | 1.78E-02 | 506.06   | not significant |
| 9475 | ACACB        | 1.14 | 4.51E-03 | 9.55E-03 | 533.30   | not significant |
| 9476 | LOC100506844 | 1.14 | 1.79E-05 | 5.73E-05 | 1931.48  | not significant |
| 9477 | ZNF691       | 1.14 | 2.83E-02 | 5.01E-02 | 293.58   | not significant |
| 9478 | BCKDHB       | 1.14 | 2.73E-04 | 7.26E-04 | 1168.21  | not significant |
| 9479 | DNAJC16      | 1.14 | 1.74E-03 | 3.97E-03 | 701.97   | not significant |
| 9480 | LOC100270804 | 1.15 | 1.31E-01 | 1.92E-01 | 38.54    | not significant |
| 9481 | VPS13C       | 1.15 | 2.60E-06 | 9.33E-06 | 5024.52  | not significant |
| 9482 | MTHFD2       | 1.15 | 1.12E-09 | 5.87E-09 | 7822.39  | not significant |
| 9483 | HIGD2A       | 1.15 | 2.31E-05 | 7.30E-05 | 2405.25  | not significant |
| 9484 | RPS7         | 1.15 | 7.76E-03 | 1.56E-02 | 18892.07 | not significant |
| 9485 | ZNF461       | 1.15 | 6.07E-02 | 9.84E-02 | 224.93   | not significant |
| 9486 | TRIM9        | 1.15 | 1.30E-01 | 1.91E-01 | 38.17    | not significant |
| 9487 | CD46         | 1.15 | 5.11E-08 | 2.26E-07 | 4779.34  | not significant |
| 9488 | SCGB3A1      | 1.15 | 1.04E-02 | 2.04E-02 | 417.11   | not significant |
| 9489 | FBXL12       | 1.15 | 2.09E-03 | 4.71E-03 | 675.34   | not significant |
| 9490 | GOLGA1       | 1.15 | 7.63E-03 | 1.54E-02 | 519.66   | not significant |
| 9491 | CDK2         | 1.15 | 1.53E-11 | 9.69E-11 | 7329.18  | not significant |
| 9492 | C9orf43      | 1.15 | 6.24E-02 | 1.01E-01 | 10.61    | not significant |

|      |              |      |          |          |          |                 |
|------|--------------|------|----------|----------|----------|-----------------|
| 9493 | ZNF680       | 1.15 | 1.77E-04 | 4.87E-04 | 1067.73  | not significant |
| 9494 | RTF1         | 1.15 | 2.51E-08 | 1.15E-07 | 4531.07  | not significant |
| 9495 | RABL2A       | 1.15 | 1.15E-01 | 1.72E-01 | 73.96    | not significant |
| 9496 | FLOT2        | 1.15 | 1.76E-04 | 4.86E-04 | 1172.49  | not significant |
| 9497 | ISY1         | 1.15 | 6.07E-04 | 1.51E-03 | 989.15   | not significant |
| 9498 | SUPT7L       | 1.15 | 3.99E-05 | 1.22E-04 | 1739.68  | not significant |
| 9499 | DMAP1        | 1.15 | 1.71E-03 | 3.92E-03 | 866.20   | not significant |
| 9500 | RBBP4        | 1.15 | 4.96E-13 | 3.59E-12 | 18248.56 | not significant |
| 9501 | KLHL25       | 1.15 | 1.43E-02 | 2.72E-02 | 353.40   | not significant |
| 9502 | TEP1         | 1.15 | 9.12E-04 | 2.20E-03 | 1330.48  | not significant |
| 9503 | ARL17A       | 1.15 | 5.75E-02 | 9.40E-02 | 182.28   | not significant |
| 9504 | ADPGK        | 1.15 | 3.78E-05 | 1.16E-04 | 1570.98  | not significant |
| 9505 | RBM12B       | 1.15 | 3.03E-06 | 1.08E-05 | 2212.99  | not significant |
| 9506 | DYNC1L12     | 1.15 | 1.79E-04 | 4.93E-04 | 2026.08  | not significant |
| 9507 | POMT2        | 1.15 | 3.95E-03 | 8.46E-03 | 568.79   | not significant |
| 9508 | ZSCAN31      | 1.15 | 1.24E-01 | 1.83E-01 | 54.22    | not significant |
| 9509 | CENPT        | 1.15 | 4.84E-02 | 8.07E-02 | 1601.50  | not significant |
| 9510 | RUFY2        | 1.15 | 2.47E-02 | 4.44E-02 | 387.85   | not significant |
| 9511 | SECISBP2L    | 1.15 | 3.35E-05 | 1.03E-04 | 2064.89  | not significant |
| 9512 | KIAA0430     | 1.15 | 3.22E-06 | 1.14E-05 | 3101.93  | not significant |
| 9513 | MAN2A1       | 1.15 | 2.85E-07 | 1.15E-06 | 2497.75  | not significant |
| 9514 | DRAM2        | 1.15 | 4.77E-05 | 1.44E-04 | 1348.02  | not significant |
| 9515 | ABHD2        | 1.15 | 4.54E-08 | 2.03E-07 | 3120.16  | not significant |
| 9516 | GNAQ         | 1.15 | 2.17E-10 | 1.24E-09 | 6579.03  | not significant |
| 9517 | DCUN1D4      | 1.15 | 3.59E-03 | 7.75E-03 | 698.27   | not significant |
| 9518 | C7orf60      | 1.15 | 5.81E-04 | 1.45E-03 | 921.77   | not significant |
| 9519 | CD58         | 1.15 | 2.02E-02 | 3.70E-02 | 1693.16  | not significant |
| 9520 | ZNF436       | 1.15 | 1.75E-02 | 3.25E-02 | 332.81   | not significant |
| 9521 | TRAF7        | 1.15 | 3.68E-09 | 1.84E-08 | 5017.89  | not significant |
| 9522 | LDB1         | 1.15 | 7.52E-06 | 2.54E-05 | 3686.81  | not significant |
| 9523 | LOC102724814 | 1.15 | 9.55E-02 | 1.47E-01 | 107.29   | not significant |
| 9524 | CTDNBP1      | 1.15 | 2.55E-09 | 1.30E-08 | 6277.49  | not significant |
| 9525 | 43719_6028   | 1.15 | 4.00E-03 | 8.55E-03 | 592.65   | not significant |
| 9526 | RASAL3       | 1.15 | 8.53E-06 | 2.86E-05 | 1761.85  | not significant |
| 9527 | POFUT2       | 1.15 | 1.45E-02 | 2.75E-02 | 408.72   | not significant |
| 9528 | ZNF764       | 1.15 | 5.12E-03 | 1.07E-02 | 557.55   | not significant |
| 9529 | UBE2Q2       | 1.15 | 2.92E-06 | 1.05E-05 | 1832.46  | not significant |
| 9530 | AMBRA1       | 1.15 | 2.00E-06 | 7.30E-06 | 2079.57  | not significant |
| 9531 | ATG2A        | 1.15 | 2.44E-04 | 6.54E-04 | 1077.05  | not significant |
| 9532 | PEX1         | 1.15 | 1.76E-05 | 5.65E-05 | 1814.48  | not significant |
| 9533 | CD1E         | 1.15 | 2.98E-11 | 1.84E-10 | 24595.60 | not significant |
| 9534 | PSPC1        | 1.15 | 3.42E-07 | 1.37E-06 | 2379.98  | not significant |
| 9535 | CEPT1        | 1.15 | 5.38E-07 | 2.10E-06 | 2495.44  | not significant |
| 9536 | PTK7         | 1.15 | 3.82E-06 | 1.34E-05 | 2386.52  | not significant |
| 9537 | BNIP3L       | 1.15 | 4.64E-08 | 2.07E-07 | 3388.75  | not significant |
| 9538 | RPL4         | 1.15 | 5.80E-09 | 2.84E-08 | 39626.73 | not significant |
| 9539 | FTL          | 1.15 | 2.87E-08 | 1.31E-07 | 11968.79 | not significant |
| 9540 | SUGT1P3      | 1.15 | 8.53E-02 | 1.33E-01 | 14.83    | not significant |
| 9541 | FUT4         | 1.15 | 4.45E-05 | 1.35E-04 | 1569.19  | not significant |
| 9542 | IRF2BP2      | 1.15 | 8.77E-07 | 3.34E-06 | 3201.43  | not significant |
| 9543 | MIB1         | 1.15 | 5.02E-08 | 2.23E-07 | 3480.77  | not significant |
| 9544 | USP22        | 1.15 | 5.79E-11 | 3.47E-10 | 11972.69 | not significant |
| 9545 | CCNJ         | 1.15 | 1.24E-03 | 2.91E-03 | 724.86   | not significant |
| 9546 | HENMT1       | 1.15 | 1.03E-05 | 3.41E-05 | 1741.37  | not significant |
| 9547 | DOPEY2       | 1.15 | 5.44E-05 | 1.63E-04 | 1554.86  | not significant |
| 9548 | APPL2        | 1.15 | 2.40E-04 | 6.44E-04 | 1169.88  | not significant |
| 9549 | ZNF879       | 1.15 | 1.08E-01 | 1.64E-01 | 26.09    | not significant |
| 9550 | RPS19        | 1.15 | 1.41E-06 | 5.24E-06 | 15833.81 | not significant |
| 9551 | SMARCC2      | 1.15 | 1.12E-06 | 4.23E-06 | 10055.72 | not significant |
| 9552 | ZBTB7C       | 1.15 | 1.16E-01 | 1.73E-01 | 61.56    | not significant |
| 9553 | RCC2         | 1.15 | 4.30E-10 | 2.37E-09 | 16031.86 | not significant |
| 9554 | HIPK1        | 1.15 | 2.58E-07 | 1.05E-06 | 4715.00  | not significant |
| 9555 | CLIC1        | 1.15 | 1.16E-06 | 4.37E-06 | 2305.50  | not significant |
| 9556 | IFITM3       | 1.15 | 1.20E-01 | 1.79E-01 | 37.67    | not significant |
| 9557 | CRNDE        | 1.15 | 2.70E-05 | 8.45E-05 | 1663.36  | not significant |
| 9558 | LOC728024    | 1.15 | 1.21E-01 | 1.81E-01 | 46.71    | not significant |
| 9559 | CDAN1        | 1.15 | 2.58E-05 | 8.07E-05 | 1425.12  | not significant |
| 9560 | WDR48        | 1.15 | 1.54E-06 | 5.69E-06 | 1989.07  | not significant |
| 9561 | C9orf72      | 1.15 | 1.05E-01 | 1.59E-01 | 303.61   | not significant |
| 9562 | TAZ          | 1.15 | 1.53E-02 | 2.88E-02 | 348.86   | not significant |
| 9563 | STRIP1       | 1.15 | 4.52E-06 | 1.57E-05 | 1755.03  | not significant |
| 9564 | PLXNA3       | 1.15 | 2.49E-02 | 4.46E-02 | 327.71   | not significant |
| 9565 | CIC          | 1.15 | 4.62E-07 | 1.82E-06 | 2968.63  | not significant |
| 9566 | EID1         | 1.15 | 7.83E-10 | 4.19E-09 | 4454.98  | not significant |
| 9567 | PTPRCAP      | 1.15 | 2.78E-07 | 1.13E-06 | 6404.34  | not significant |
| 9568 | ZNF320       | 1.15 | 1.06E-05 | 3.51E-05 | 1687.28  | not significant |
| 9569 | MDP1         | 1.15 | 1.17E-01 | 1.74E-01 | 29.63    | not significant |
| 9570 | MAP3K14      | 1.15 | 2.28E-03 | 5.09E-03 | 595.72   | not significant |
| 9571 | P4KAP1       | 1.15 | 8.99E-02 | 1.39E-01 | 101.15   | not significant |
| 9572 | MIER2        | 1.15 | 4.24E-04 | 1.09E-03 | 832.03   | not significant |
| 9573 | IGFLR1       | 1.15 | 6.17E-02 | 9.99E-02 | 142.55   | not significant |
| 9574 | GRAMD1C      | 1.15 | 6.18E-02 | 1.00E-01 | 139.21   | not significant |
| 9575 | ZBTB11       | 1.15 | 7.41E-06 | 2.51E-05 | 1978.96  | not significant |
| 9576 | CHURC1       | 1.15 | 3.41E-06 | 1.21E-05 | 1775.35  | not significant |
| 9577 | ZNF700       | 1.15 | 2.93E-03 | 6.41E-03 | 630.24   | not significant |
| 9578 | LOC150776    | 1.15 | 8.86E-03 | 1.76E-02 | 479.20   | not significant |
| 9579 | MSI2         | 1.15 | 1.25E-09 | 6.55E-09 | 6311.61  | not significant |
| 9580 | TEX264       | 1.15 | 2.47E-05 | 7.76E-05 | 1369.86  | not significant |

|      |            |      |          |          |          |                 |
|------|------------|------|----------|----------|----------|-----------------|
| 9581 | ZNF641     | 1.15 | 7.13E-03 | 1.45E-02 | 434.64   | not significant |
| 9582 | RNF123     | 1.15 | 4.31E-06 | 1.50E-05 | 1602.48  | not significant |
| 9583 | EVPL       | 1.15 | 1.40E-03 | 3.26E-03 | 800.99   | not significant |
| 9584 | ACP2       | 1.15 | 2.72E-03 | 6.00E-03 | 594.99   | not significant |
| 9585 | MESDC1     | 1.15 | 9.43E-06 | 3.14E-05 | 2656.11  | not significant |
| 9586 | RABAC1     | 1.15 | 1.48E-02 | 2.80E-02 | 340.86   | not significant |
| 9587 | PRSS21     | 1.15 | 4.77E-04 | 1.21E-03 | 863.18   | not significant |
| 9588 | ZNF487     | 1.15 | 1.17E-01 | 1.74E-01 | 45.18    | not significant |
| 9589 | FBXL14     | 1.15 | 6.08E-04 | 1.51E-03 | 1077.74  | not significant |
| 9590 | RIN3       | 1.15 | 4.72E-08 | 2.10E-07 | 3022.36  | not significant |
| 9591 | TTLL1      | 1.15 | 1.03E-02 | 2.03E-02 | 370.29   | not significant |
| 9592 | MOAP1      | 1.15 | 6.19E-05 | 1.84E-04 | 1360.00  | not significant |
| 9593 | CUX1       | 1.15 | 2.07E-06 | 7.52E-06 | 1753.86  | not significant |
| 9594 | POLR2J3    | 1.15 | 1.74E-02 | 3.24E-02 | 328.10   | not significant |
| 9595 | ZNF709     | 1.15 | 4.42E-02 | 7.45E-02 | 187.91   | not significant |
| 9596 | DDX42      | 1.15 | 3.02E-13 | 2.22E-12 | 7547.59  | not significant |
| 9597 | MRE11A     | 1.15 | 1.47E-06 | 5.47E-06 | 3004.52  | not significant |
| 9598 | TESK1      | 1.15 | 1.80E-04 | 4.94E-04 | 931.36   | not significant |
| 9599 | PUM1       | 1.15 | 1.43E-08 | 6.70E-08 | 3923.31  | not significant |
| 9600 | HINT3      | 1.15 | 6.28E-04 | 1.56E-03 | 853.42   | not significant |
| 9601 | RCN2       | 1.15 | 1.28E-08 | 6.04E-08 | 3250.34  | not significant |
| 9602 | SLC44A2    | 1.15 | 4.40E-10 | 2.43E-09 | 3789.87  | not significant |
| 9603 | STX2       | 1.15 | 3.13E-05 | 9.70E-05 | 1579.80  | not significant |
| 9604 | BPTF       | 1.15 | 5.58E-08 | 2.46E-07 | 8782.53  | not significant |
| 9605 | SIN3B      | 1.15 | 5.98E-06 | 2.05E-05 | 1656.77  | not significant |
| 9606 | SMIM17     | 1.15 | 1.14E-01 | 1.71E-01 | 38.77    | not significant |
| 9607 | POGK       | 1.15 | 3.71E-09 | 1.86E-08 | 3501.73  | not significant |
| 9608 | RFFL       | 1.15 | 1.10E-01 | 1.66E-01 | 59.51    | not significant |
| 9609 | GATAD2B    | 1.15 | 6.92E-03 | 1.41E-02 | 487.35   | not significant |
| 9610 | NIPAL3     | 1.15 | 5.36E-05 | 1.61E-04 | 1090.30  | not significant |
| 9611 | ZNF528     | 1.15 | 4.68E-02 | 7.84E-02 | 172.60   | not significant |
| 9612 | CYP51A1    | 1.15 | 3.05E-04 | 8.05E-04 | 1070.83  | not significant |
| 9613 | JMJD1C     | 1.15 | 7.03E-06 | 2.39E-05 | 2932.04  | not significant |
| 9614 | ZNF341     | 1.16 | 3.49E-02 | 6.03E-02 | 198.33   | not significant |
| 9615 | ITPKB      | 1.16 | 1.13E-04 | 3.21E-04 | 972.41   | not significant |
| 9616 | RCBTB2     | 1.16 | 1.19E-11 | 7.65E-11 | 23312.92 | not significant |
| 9617 | C2orf68    | 1.16 | 1.79E-07 | 7.43E-07 | 2236.63  | not significant |
| 9618 | KDM4B      | 1.16 | 4.78E-06 | 1.65E-05 | 1827.68  | not significant |
| 9619 | NKX3-2     | 1.16 | 6.47E-02 | 1.04E-01 | 12.16    | not significant |
| 9620 | ZNF880     | 1.16 | 1.08E-02 | 2.11E-02 | 344.87   | not significant |
| 9621 | RTTN       | 1.16 | 6.65E-06 | 2.27E-05 | 1526.21  | not significant |
| 9622 | POC1A      | 1.16 | 1.16E-06 | 4.37E-06 | 1978.54  | not significant |
| 9623 | CYHR1      | 1.16 | 3.49E-04 | 9.09E-04 | 818.05   | not significant |
| 9624 | ARHGEF2    | 1.16 | 4.57E-10 | 2.52E-09 | 4265.60  | not significant |
| 9625 | SYNJ2BP    | 1.16 | 8.20E-06 | 2.75E-05 | 1769.30  | not significant |
| 9626 | AKT1       | 1.16 | 4.82E-12 | 3.21E-11 | 9490.46  | not significant |
| 9627 | C19orf54   | 1.16 | 1.84E-04 | 5.04E-04 | 999.28   | not significant |
| 9628 | CELSR2     | 1.16 | 1.67E-04 | 4.63E-04 | 989.21   | not significant |
| 9629 | KAT7       | 1.16 | 2.48E-07 | 1.01E-06 | 2527.88  | not significant |
| 9630 | ZNF730     | 1.16 | 1.22E-02 | 2.35E-02 | 328.38   | not significant |
| 9631 | PHKG2      | 1.16 | 8.08E-05 | 2.35E-04 | 1051.97  | not significant |
| 9632 | CHIC2      | 1.16 | 1.27E-02 | 2.43E-02 | 328.14   | not significant |
| 9633 | ZNF350     | 1.16 | 2.31E-02 | 4.17E-02 | 273.22   | not significant |
| 9634 | INO80C     | 1.16 | 4.94E-03 | 1.04E-02 | 456.09   | not significant |
| 9635 | SMG1P7     | 1.16 | 7.98E-02 | 1.25E-01 | 103.65   | not significant |
| 9636 | PLAGL1     | 1.16 | 3.68E-04 | 9.55E-04 | 871.06   | not significant |
| 9637 | ZNF670     | 1.16 | 1.77E-02 | 3.28E-02 | 342.38   | not significant |
| 9638 | EIF2D      | 1.16 | 5.38E-06 | 1.85E-05 | 1509.95  | not significant |
| 9639 | ZNF644     | 1.16 | 9.17E-08 | 3.94E-07 | 2441.81  | not significant |
| 9640 | TMEM192    | 1.16 | 1.21E-02 | 2.34E-02 | 395.61   | not significant |
| 9641 | MOSPD2     | 1.16 | 5.67E-03 | 1.17E-02 | 434.18   | not significant |
| 9642 | PARP8      | 1.16 | 5.04E-07 | 1.98E-06 | 2095.92  | not significant |
| 9643 | FLVCR1     | 1.16 | 4.43E-04 | 1.13E-03 | 1003.24  | not significant |
| 9644 | PCMTD2     | 1.16 | 1.33E-06 | 4.96E-06 | 1837.48  | not significant |
| 9645 | NOTCH1     | 1.16 | 5.94E-03 | 1.22E-02 | 13481.21 | not significant |
| 9646 | C1orf159   | 1.16 | 3.37E-03 | 7.31E-03 | 526.15   | not significant |
| 9647 | CKMT2-AS1  | 1.16 | 3.79E-02 | 6.49E-02 | 190.29   | not significant |
| 9648 | ABHD3      | 1.16 | 9.44E-07 | 3.59E-06 | 2103.19  | not significant |
| 9649 | C12orf45   | 1.16 | 1.05E-02 | 2.05E-02 | 408.77   | not significant |
| 9650 | ANKRD9     | 1.16 | 1.12E-01 | 1.68E-01 | 33.84    | not significant |
| 9651 | ACSS1      | 1.16 | 1.31E-08 | 6.19E-08 | 6574.07  | not significant |
| 9652 | MYBL1      | 1.16 | 5.47E-04 | 1.38E-03 | 1066.27  | not significant |
| 9653 | ACP1       | 1.16 | 4.27E-10 | 2.36E-09 | 6798.43  | not significant |
| 9654 | PARP16     | 1.16 | 6.76E-05 | 2.00E-04 | 1067.61  | not significant |
| 9655 | PNPLA8     | 1.16 | 3.33E-05 | 1.03E-04 | 1238.85  | not significant |
| 9656 | CEP128     | 1.16 | 3.28E-06 | 1.16E-05 | 1791.41  | not significant |
| 9657 | ATP6AP1    | 1.16 | 1.02E-03 | 2.43E-03 | 651.87   | not significant |
| 9658 | ESR2       | 1.16 | 8.36E-02 | 1.31E-01 | 18.83    | not significant |
| 9659 | TIA1       | 1.16 | 7.30E-07 | 2.81E-06 | 6214.63  | not significant |
| 9660 | PRRG2      | 1.16 | 4.27E-02 | 7.22E-02 | 9.14     | not significant |
| 9661 | ZMYM6NB    | 1.16 | 1.97E-03 | 4.45E-03 | 605.55   | not significant |
| 9662 | SLC2A13    | 1.16 | 3.53E-03 | 7.63E-03 | 483.57   | not significant |
| 9663 | MEX3D      | 1.16 | 3.34E-05 | 1.03E-04 | 1587.41  | not significant |
| 9664 | SEC24B-AS1 | 1.16 | 1.09E-01 | 1.64E-01 | 31.65    | not significant |
| 9665 | BDH2       | 1.16 | 1.91E-04 | 5.23E-04 | 945.71   | not significant |
| 9666 | CCDC176    | 1.16 | 3.34E-02 | 5.82E-02 | 207.47   | not significant |
| 9667 | PPM1E      | 1.16 | 7.72E-02 | 1.22E-01 | 107.18   | not significant |
| 9668 | WDFY2      | 1.16 | 1.07E-03 | 2.54E-03 | 617.63   | not significant |

|      |           |      |          |          |          |                 |
|------|-----------|------|----------|----------|----------|-----------------|
| 9669 | BTN3A2    | 1.16 | 7.85E-08 | 3.39E-07 | 2290.02  | not significant |
| 9670 | NPC1      | 1.16 | 6.97E-05 | 2.05E-04 | 1079.55  | not significant |
| 9671 | GLIS2     | 1.16 | 1.04E-01 | 1.58E-01 | 53.79    | not significant |
| 9672 | GPC6      | 1.16 | 9.66E-02 | 1.48E-01 | 67.44    | not significant |
| 9673 | LOC389765 | 1.16 | 8.86E-02 | 1.37E-01 | 85.78    | not significant |
| 9674 | OIP5-AS1  | 1.16 | 1.26E-07 | 5.31E-07 | 2393.83  | not significant |
| 9675 | SEMA4A    | 1.16 | 1.11E-02 | 2.15E-02 | 335.09   | not significant |
| 9676 | ZNF714    | 1.16 | 1.30E-07 | 5.47E-07 | 2371.49  | not significant |
| 9677 | GPATCH2   | 1.16 | 2.31E-03 | 5.16E-03 | 609.40   | not significant |
| 9678 | LINC01222 | 1.16 | 1.10E-01 | 1.66E-01 | 36.24    | not significant |
| 9679 | RCBTB1    | 1.16 | 3.49E-07 | 1.40E-06 | 2182.44  | not significant |
| 9680 | ITGA7     | 1.16 | 1.07E-01 | 1.62E-01 | 47.05    | not significant |
| 9681 | ZNF837    | 1.16 | 3.26E-02 | 5.68E-02 | 215.97   | not significant |
| 9682 | FUCA1     | 1.16 | 1.42E-02 | 2.70E-02 | 317.50   | not significant |
| 9683 | RAD54L    | 1.16 | 2.59E-10 | 1.47E-09 | 4853.45  | not significant |
| 9684 | CASP10    | 1.16 | 1.63E-07 | 6.80E-07 | 2352.37  | not significant |
| 9685 | SYNE3     | 1.16 | 3.02E-02 | 5.31E-02 | 215.60   | not significant |
| 9686 | IPO5      | 1.16 | 6.10E-16 | 5.70E-15 | 15418.85 | not significant |
| 9687 | LINC00669 | 1.16 | 6.66E-02 | 1.07E-01 | 111.12   | not significant |
| 9688 | RPS4Y1    | 1.16 | 4.95E-11 | 3.00E-10 | 13560.06 | not significant |
| 9689 | LOC642361 | 1.16 | 1.04E-01 | 1.58E-01 | 57.85    | not significant |
| 9690 | RAB1F     | 1.16 | 2.92E-04 | 7.72E-04 | 821.48   | not significant |
| 9691 | ZNF814    | 1.16 | 2.96E-03 | 6.48E-03 | 550.68   | not significant |
| 9692 | ZNF417    | 1.16 | 1.64E-03 | 3.76E-03 | 640.50   | not significant |
| 9693 | ZNF71     | 1.16 | 2.81E-04 | 7.43E-04 | 853.41   | not significant |
| 9694 | ZFP64     | 1.16 | 6.21E-04 | 1.54E-03 | 744.72   | not significant |
| 9695 | TRIM13    | 1.16 | 4.99E-05 | 1.50E-04 | 1141.76  | not significant |
| 9696 | SNX30     | 1.16 | 6.47E-03 | 1.32E-02 | 411.78   | not significant |
| 9697 | METAP2    | 1.16 | 4.55E-12 | 3.03E-11 | 7614.11  | not significant |
| 9698 | WNK1      | 1.16 | 9.79E-11 | 5.76E-10 | 18698.29 | not significant |
| 9699 | FBRS      | 1.16 | 8.68E-09 | 4.20E-08 | 3461.81  | not significant |
| 9700 | CCS       | 1.16 | 1.09E-02 | 2.12E-02 | 376.09   | not significant |
| 9701 | FLJ42351  | 1.16 | 5.80E-02 | 9.46E-02 | 11.40    | not significant |
| 9702 | LINC00294 | 1.16 | 2.37E-03 | 5.29E-03 | 556.72   | not significant |
| 9703 | PIGL      | 1.16 | 2.65E-02 | 4.72E-02 | 235.75   | not significant |
| 9704 | FAM95C    | 1.16 | 4.80E-02 | 8.02E-02 | 10.28    | not significant |
| 9705 | TLL3      | 1.16 | 5.45E-02 | 8.97E-02 | 163.60   | not significant |
| 9706 | ANO5      | 1.16 | 8.28E-03 | 1.65E-02 | 355.94   | not significant |
| 9707 | VDAC2     | 1.16 | 3.05E-06 | 1.09E-05 | 1738.89  | not significant |
| 9708 | NONO      | 1.16 | 2.31E-16 | 2.23E-15 | 31227.44 | not significant |
| 9709 | FBXO46    | 1.16 | 1.09E-04 | 3.09E-04 | 935.45   | not significant |
| 9710 | SCAPER    | 1.16 | 6.02E-05 | 1.79E-04 | 1002.38  | not significant |
| 9711 | RBM4      | 1.16 | 1.02E-04 | 2.92E-04 | 931.68   | not significant |
| 9712 | SCAI      | 1.16 | 2.93E-02 | 5.17E-02 | 1624.05  | not significant |
| 9713 | Cxorf57   | 1.16 | 5.39E-03 | 1.12E-02 | 508.40   | not significant |
| 9714 | CD5       | 1.16 | 1.17E-11 | 7.51E-11 | 6930.11  | not significant |
| 9715 | TIGD5     | 1.16 | 1.57E-02 | 2.94E-02 | 345.27   | not significant |
| 9716 | MYO9B     | 1.16 | 3.82E-08 | 1.72E-07 | 7319.47  | not significant |
| 9717 | LOC728743 | 1.16 | 6.94E-06 | 2.36E-05 | 1828.19  | not significant |
| 9718 | USP4      | 1.16 | 9.95E-09 | 4.78E-08 | 2812.67  | not significant |
| 9719 | METTL25   | 1.16 | 1.02E-02 | 2.00E-02 | 348.27   | not significant |
| 9720 | SMAD4     | 1.16 | 3.22E-08 | 1.46E-07 | 3044.18  | not significant |
| 9721 | CD1C      | 1.16 | 1.19E-06 | 4.48E-06 | 1935.53  | not significant |
| 9722 | CCNT1     | 1.16 | 6.89E-10 | 3.71E-09 | 4292.95  | not significant |
| 9723 | ZNF787    | 1.16 | 6.53E-05 | 1.93E-04 | 1126.78  | not significant |
| 9724 | ZNF254    | 1.16 | 2.11E-05 | 6.70E-05 | 1276.32  | not significant |
| 9725 | EID2B     | 1.16 | 7.14E-02 | 1.13E-01 | 105.29   | not significant |
| 9726 | EPHX2     | 1.16 | 6.25E-04 | 1.55E-03 | 655.94   | not significant |
| 9727 | DAP3      | 1.16 | 2.31E-11 | 1.43E-10 | 4293.51  | not significant |
| 9728 | SIGIRR    | 1.16 | 1.86E-06 | 6.82E-06 | 1621.36  | not significant |
| 9729 | CD83      | 1.16 | 4.47E-05 | 1.36E-04 | 1609.45  | not significant |
| 9730 | ZNF816    | 1.16 | 5.85E-03 | 1.21E-02 | 391.89   | not significant |
| 9731 | CRTC1     | 1.16 | 2.35E-03 | 5.25E-03 | 525.77   | not significant |
| 9732 | PWARSN    | 1.16 | 1.02E-01 | 1.55E-01 | 49.61    | not significant |
| 9733 | KRBOX4    | 1.16 | 1.49E-03 | 3.44E-03 | 598.49   | not significant |
| 9734 | LYPD5     | 1.16 | 8.42E-02 | 1.31E-01 | 20.41    | not significant |
| 9735 | ZNF696    | 1.16 | 1.61E-03 | 3.69E-03 | 592.07   | not significant |
| 9736 | ZNF304    | 1.16 | 1.01E-03 | 2.42E-03 | 622.35   | not significant |
| 9737 | ADCK2     | 1.16 | 1.12E-05 | 3.69E-05 | 1750.12  | not significant |
| 9738 | CDH4      | 1.16 | 9.96E-06 | 3.30E-05 | 1493.44  | not significant |
| 9739 | MMP24-AS1 | 1.16 | 3.25E-04 | 8.51E-04 | 728.94   | not significant |
| 9740 | HS2D      | 1.16 | 4.66E-02 | 7.81E-02 | 149.35   | not significant |
| 9741 | JOSD1     | 1.16 | 4.54E-08 | 2.03E-07 | 2814.17  | not significant |
| 9742 | ARL13B    | 1.16 | 1.99E-03 | 4.49E-03 | 544.85   | not significant |
| 9743 | ZNRD1     | 1.16 | 9.05E-03 | 1.79E-02 | 331.08   | not significant |
| 9744 | IQGAP2    | 1.16 | 1.72E-11 | 1.08E-10 | 5575.77  | not significant |
| 9745 | PRKCQ-AS1 | 1.16 | 6.70E-05 | 1.98E-04 | 1145.36  | not significant |
| 9746 | PPP1R13L  | 1.16 | 1.30E-02 | 2.49E-02 | 328.35   | not significant |
| 9747 | DNASE1L2  | 1.16 | 9.56E-02 | 1.47E-01 | 60.74    | not significant |
| 9748 | TPRA1     | 1.16 | 1.90E-04 | 5.21E-04 | 944.57   | not significant |
| 9749 | ARHGAP27  | 1.16 | 9.61E-05 | 2.77E-04 | 909.47   | not significant |
| 9750 | UBXN6     | 1.16 | 5.05E-07 | 1.98E-06 | 2466.65  | not significant |
| 9751 | AHNAK     | 1.16 | 1.12E-02 | 2.18E-02 | 330.31   | not significant |
| 9752 | DNAJC27   | 1.16 | 1.88E-02 | 3.48E-02 | 259.67   | not significant |
| 9753 | RPL15     | 1.16 | 7.60E-14 | 5.91E-13 | 18745.31 | not significant |
| 9754 | ZNF212    | 1.16 | 4.09E-04 | 1.05E-03 | 784.96   | not significant |
| 9755 | ODF2L     | 1.16 | 2.13E-04 | 5.77E-04 | 823.92   | not significant |
| 9756 | TM2D3     | 1.16 | 8.80E-05 | 2.55E-04 | 1005.89  | not significant |

|      |             |      |          |          |          |                 |
|------|-------------|------|----------|----------|----------|-----------------|
| 9757 | IPO8        | 1.16 | 1.41E-08 | 6.63E-08 | 2815.53  | not significant |
| 9758 | ZDHC12      | 1.16 | 1.13E-04 | 3.20E-04 | 1170.18  | not significant |
| 9759 | NLK         | 1.16 | 1.81E-06 | 6.65E-06 | 1791.34  | not significant |
| 9760 | GNRH1       | 1.16 | 7.08E-02 | 1.13E-01 | 106.51   | not significant |
| 9761 | TTY15       | 1.16 | 1.32E-06 | 4.94E-06 | 1602.32  | not significant |
| 9762 | ZNF234      | 1.16 | 9.01E-04 | 2.17E-03 | 693.60   | not significant |
| 9763 | TMEM140     | 1.16 | 6.81E-02 | 1.09E-01 | 105.47   | not significant |
| 9764 | CKLF        | 1.16 | 1.78E-04 | 4.90E-04 | 1007.53  | not significant |
| 9765 | SNX5        | 1.16 | 9.29E-11 | 5.48E-10 | 5386.27  | not significant |
| 9766 | PHKA2       | 1.16 | 7.40E-07 | 2.84E-06 | 1666.24  | not significant |
| 9767 | SLC25A45    | 1.16 | 4.18E-03 | 8.90E-03 | 496.64   | not significant |
| 9768 | C11orf84    | 1.16 | 1.36E-09 | 7.09E-09 | 3251.35  | not significant |
| 9769 | GABRA5      | 1.16 | 7.14E-03 | 1.45E-02 | 349.29   | not significant |
| 9770 | TMEM259     | 1.16 | 9.40E-04 | 2.26E-03 | 6425.30  | not significant |
| 9771 | ELF1        | 1.16 | 2.92E-11 | 1.80E-10 | 5378.00  | not significant |
| 9772 | CCDC42      | 1.16 | 4.34E-02 | 7.33E-02 | 11.18    | not significant |
| 9773 | SFMBT2      | 1.16 | 3.15E-07 | 1.27E-06 | 2277.61  | not significant |
| 9774 | TWSG1       | 1.16 | 1.33E-05 | 4.37E-05 | 1306.84  | not significant |
| 9775 | ZFYVE26     | 1.16 | 1.83E-04 | 5.03E-04 | 1239.57  | not significant |
| 9776 | FAM222A     | 1.16 | 3.08E-02 | 5.41E-02 | 197.33   | not significant |
| 9777 | C8orf88     | 1.16 | 3.01E-05 | 9.35E-05 | 1166.57  | not significant |
| 9778 | ZBED6       | 1.16 | 2.55E-04 | 6.84E-04 | 810.78   | not significant |
| 9779 | LYSMD4      | 1.16 | 8.04E-03 | 1.61E-02 | 370.23   | not significant |
| 9780 | ZNF131      | 1.17 | 3.88E-07 | 1.55E-06 | 2280.79  | not significant |
| 9781 | RC3H2       | 1.17 | 1.84E-06 | 6.74E-06 | 1461.88  | not significant |
| 9782 | LAX1        | 1.17 | 1.06E-05 | 3.50E-05 | 1233.45  | not significant |
| 9783 | THAP4       | 1.17 | 7.64E-07 | 2.93E-06 | 1794.39  | not significant |
| 9784 | KIF7        | 1.17 | 6.12E-04 | 1.52E-03 | 658.90   | not significant |
| 9785 | RPS26       | 1.17 | 4.47E-12 | 2.98E-11 | 5778.43  | not significant |
| 9786 | STAU1       | 1.17 | 3.83E-11 | 2.34E-10 | 4572.86  | not significant |
| 9787 | CCP110      | 1.17 | 3.81E-11 | 2.33E-10 | 4708.89  | not significant |
| 9788 | PCBP4       | 1.17 | 3.86E-03 | 8.29E-03 | 468.73   | not significant |
| 9789 | CTNS        | 1.17 | 4.72E-04 | 1.20E-03 | 723.70   | not significant |
| 9790 | RPS2        | 1.17 | 8.72E-10 | 4.63E-09 | 44348.97 | not significant |
| 9791 | ZNF34       | 1.17 | 6.73E-02 | 1.08E-01 | 102.27   | not significant |
| 9792 | RPS16       | 1.17 | 2.29E-13 | 1.71E-12 | 20239.25 | not significant |
| 9793 | RPSAP58     | 1.17 | 5.54E-03 | 1.15E-02 | 428.91   | not significant |
| 9794 | TMEM219     | 1.17 | 1.36E-05 | 4.45E-05 | 1224.01  | not significant |
| 9795 | DNAJC27-AS1 | 1.17 | 4.06E-02 | 6.89E-02 | 9.66     | not significant |
| 9796 | MAL         | 1.17 | 8.04E-14 | 6.25E-13 | 13709.48 | not significant |
| 9797 | PAPSS1      | 1.17 | 1.35E-08 | 6.37E-08 | 2524.47  | not significant |
| 9798 | STAT1       | 1.17 | 1.87E-12 | 1.29E-11 | 6614.59  | not significant |
| 9799 | KIAA0753    | 1.17 | 2.21E-04 | 5.99E-04 | 846.89   | not significant |
| 9800 | N4BP2L2     | 1.17 | 2.33E-08 | 1.08E-07 | 2694.20  | not significant |
| 9801 | SLC35B2     | 1.17 | 5.79E-06 | 1.98E-05 | 1570.79  | not significant |
| 9802 | ABCC2       | 1.17 | 6.71E-02 | 1.08E-01 | 118.18   | not significant |
| 9803 | SLC36A4     | 1.17 | 1.36E-04 | 3.82E-04 | 839.98   | not significant |
| 9804 | CLDND1      | 1.17 | 8.69E-07 | 3.31E-06 | 1684.81  | not significant |
| 9805 | RBMX        | 1.17 | 9.50E-14 | 7.33E-13 | 23084.34 | not significant |
| 9806 | HP1BP3      | 1.17 | 3.25E-16 | 3.09E-15 | 16514.72 | not significant |
| 9807 | HADH        | 1.17 | 2.01E-12 | 1.38E-11 | 5145.13  | not significant |
| 9808 | MAPT        | 1.17 | 8.31E-02 | 1.30E-01 | 21.73    | not significant |
| 9809 | PPM1M       | 1.17 | 8.71E-05 | 2.53E-04 | 1026.56  | not significant |
| 9810 | NIPA1       | 1.17 | 9.54E-07 | 3.62E-06 | 1559.68  | not significant |
| 9811 | LCMT1       | 1.17 | 5.35E-05 | 1.60E-04 | 1098.17  | not significant |
| 9812 | CCDC81      | 1.17 | 9.45E-02 | 1.45E-01 | 27.05    | not significant |
| 9813 | CSAD        | 1.17 | 5.04E-02 | 8.37E-02 | 182.17   | not significant |
| 9814 | ZNF678      | 1.17 | 1.03E-04 | 2.95E-04 | 956.23   | not significant |
| 9815 | ARHGAP4     | 1.17 | 3.59E-08 | 1.62E-07 | 2648.80  | not significant |
| 9816 | LOC399491   | 1.17 | 8.82E-03 | 1.75E-02 | 369.53   | not significant |
| 9817 | ZNF107      | 1.17 | 2.56E-08 | 1.18E-07 | 5323.24  | not significant |
| 9818 | RPS18       | 1.17 | 7.35E-04 | 1.80E-03 | 24946.48 | not significant |
| 9819 | STK11IP     | 1.17 | 1.44E-03 | 3.34E-03 | 750.57   | not significant |
| 9820 | ZNF74       | 1.17 | 8.82E-05 | 2.55E-04 | 1041.82  | not significant |
| 9821 | METRN       | 1.17 | 4.69E-02 | 7.86E-02 | 160.68   | not significant |
| 9822 | CNOT8       | 1.17 | 7.34E-11 | 4.37E-10 | 4602.13  | not significant |
| 9823 | GSDMB       | 1.17 | 4.20E-02 | 7.11E-02 | 674.96   | not significant |
| 9824 | KIAA1841    | 1.17 | 7.14E-03 | 1.45E-02 | 327.76   | not significant |
| 9825 | SCART1      | 1.17 | 2.50E-02 | 4.48E-02 | 1149.82  | not significant |
| 9826 | RPS27A      | 1.17 | 7.77E-09 | 3.77E-08 | 14377.30 | not significant |
| 9827 | RPPH1       | 1.17 | 9.70E-02 | 1.49E-01 | 35.32    | not significant |
| 9828 | SLC12A9     | 1.17 | 8.36E-04 | 2.03E-03 | 639.16   | not significant |
| 9829 | DHX58       | 1.17 | 3.72E-02 | 6.38E-02 | 154.26   | not significant |
| 9830 | C22orf24    | 1.17 | 9.43E-02 | 1.45E-01 | 48.24    | not significant |
| 9831 | HPS4        | 1.17 | 2.12E-09 | 1.09E-08 | 3461.07  | not significant |
| 9832 | EFCAB7      | 1.17 | 5.15E-03 | 1.08E-02 | 377.03   | not significant |
| 9833 | RGPD3       | 1.17 | 6.99E-05 | 2.06E-04 | 1154.08  | not significant |
| 9834 | IL4R        | 1.17 | 1.98E-06 | 7.23E-06 | 1552.65  | not significant |
| 9835 | CCDC14      | 1.17 | 1.35E-02 | 2.59E-02 | 3156.48  | not significant |
| 9836 | RPS27       | 1.17 | 1.76E-14 | 1.45E-13 | 16718.35 | not significant |
| 9837 | SLC4A8      | 1.17 | 2.84E-02 | 5.03E-02 | 192.51   | not significant |
| 9838 | ZEB1        | 1.17 | 3.46E-10 | 1.93E-09 | 3957.51  | not significant |
| 9839 | EPC2        | 1.17 | 9.39E-06 | 3.13E-05 | 1151.44  | not significant |
| 9840 | TBC1D9B     | 1.17 | 1.23E-10 | 7.19E-10 | 3845.41  | not significant |
| 9841 | FN3KRP      | 1.17 | 1.37E-07 | 5.78E-07 | 2826.82  | not significant |
| 9842 | PTPN18      | 1.17 | 2.00E-07 | 8.24E-07 | 1799.48  | not significant |
| 9843 | LINC01126   | 1.17 | 5.92E-02 | 9.64E-02 | 15.17    | not significant |
| 9844 | KDM3A       | 1.17 | 1.31E-08 | 6.18E-08 | 4215.15  | not significant |



|      |            |      |          |          |          |                 |
|------|------------|------|----------|----------|----------|-----------------|
| 9845 | ARHGAP9    | 1.17 | 1.21E-07 | 5.13E-07 | 2201.53  | not significant |
| 9846 | ENGASE     | 1.17 | 7.80E-02 | 1.23E-01 | 18.41    | not significant |
| 9847 | MED12L     | 1.17 | 1.92E-04 | 5.25E-04 | 894.42   | not significant |
| 9848 | HAUS3      | 1.17 | 3.19E-06 | 1.13E-05 | 1426.94  | not significant |
| 9849 | RAB15      | 1.17 | 4.01E-08 | 1.80E-07 | 2273.65  | not significant |
| 9850 | CCDC101    | 1.17 | 2.78E-04 | 7.36E-04 | 734.65   | not significant |
| 9851 | SCGB1B2P   | 1.17 | 5.61E-02 | 9.20E-02 | 13.08    | not significant |
| 9852 | E4F1       | 1.17 | 1.56E-05 | 5.05E-05 | 1099.65  | not significant |
| 9853 | TRAPPC6B   | 1.17 | 1.10E-06 | 4.13E-06 | 1480.20  | not significant |
| 9854 | PRCP       | 1.17 | 5.63E-05 | 1.68E-04 | 920.67   | not significant |
| 9855 | ZDHHC8     | 1.17 | 1.35E-05 | 4.41E-05 | 1910.10  | not significant |
| 9856 | FDX1       | 1.17 | 3.85E-04 | 9.96E-04 | 712.18   | not significant |
| 9857 | FGF17      | 1.17 | 6.41E-02 | 1.03E-01 | 15.03    | not significant |
| 9858 | C1orf101   | 1.17 | 9.44E-02 | 1.45E-01 | 32.86    | not significant |
| 9859 | SERINC3    | 1.17 | 1.12E-12 | 7.93E-12 | 4644.49  | not significant |
| 9860 | ZNF354A    | 1.17 | 4.41E-03 | 9.37E-03 | 410.98   | not significant |
| 9861 | PCBD1      | 1.17 | 6.94E-03 | 1.41E-02 | 332.90   | not significant |
| 9862 | OSR2       | 1.17 | 5.82E-02 | 9.49E-02 | 103.52   | not significant |
| 9863 | PARP10     | 1.17 | 1.08E-03 | 2.56E-03 | 555.34   | not significant |
| 9864 | UCN        | 1.17 | 9.02E-02 | 1.39E-01 | 50.51    | not significant |
| 9865 | NFYC       | 1.17 | 1.88E-08 | 8.75E-08 | 2065.25  | not significant |
| 9866 | MAP3K3     | 1.17 | 5.17E-09 | 2.55E-08 | 2519.83  | not significant |
| 9867 | SNX13      | 1.17 | 1.75E-06 | 6.42E-06 | 1443.65  | not significant |
| 9868 | CLIP2      | 1.17 | 8.04E-02 | 1.26E-01 | 67.57    | not significant |
| 9869 | SMARCAL1   | 1.17 | 1.34E-05 | 4.39E-05 | 1245.66  | not significant |
| 9870 | SETD4      | 1.17 | 2.13E-03 | 4.79E-03 | 475.61   | not significant |
| 9871 | CABLES2    | 1.17 | 5.39E-06 | 1.85E-05 | 1296.21  | not significant |
| 9872 | NPM2       | 1.17 | 8.15E-02 | 1.28E-01 | 20.79    | not significant |
| 9873 | RAB11B     | 1.17 | 4.86E-09 | 2.41E-08 | 3670.01  | not significant |
| 9874 | EXOC7      | 1.17 | 2.50E-13 | 1.86E-12 | 9079.80  | not significant |
| 9875 | ANTXRPL1   | 1.17 | 7.88E-02 | 1.24E-01 | 21.60    | not significant |
| 9876 | ZNF189     | 1.17 | 1.35E-03 | 3.17E-03 | 492.17   | not significant |
| 9877 | CCDC71L    | 1.17 | 8.09E-05 | 2.36E-04 | 857.59   | not significant |
| 9878 | KDM6A      | 1.17 | 1.61E-06 | 5.95E-06 | 1374.53  | not significant |
| 9879 | STX5       | 1.17 | 2.44E-05 | 7.68E-05 | 1129.52  | not significant |
| 9880 | MOV10      | 1.17 | 8.60E-08 | 3.70E-07 | 4266.23  | not significant |
| 9881 | FCHSD2     | 1.17 | 7.52E-11 | 4.47E-10 | 3321.46  | not significant |
| 9882 | PCNA-AS1   | 1.17 | 8.62E-02 | 1.34E-01 | 38.66    | not significant |
| 9883 | RPL24      | 1.17 | 3.10E-09 | 1.57E-08 | 13194.01 | not significant |
| 9884 | LRRC45     | 1.17 | 2.82E-07 | 1.14E-06 | 1919.05  | not significant |
| 9885 | CXorf21    | 1.17 | 8.97E-02 | 1.39E-01 | 45.35    | not significant |
| 9886 | KLHL42     | 1.17 | 2.75E-07 | 1.12E-06 | 1885.88  | not significant |
| 9887 | EML2       | 1.17 | 4.20E-04 | 1.08E-03 | 665.74   | not significant |
| 9888 | RRN3P1     | 1.17 | 6.19E-03 | 1.27E-02 | 422.18   | not significant |
| 9889 | TMEM201    | 1.17 | 1.58E-07 | 6.57E-07 | 1929.13  | not significant |
| 9890 | POLDIP3    | 1.17 | 3.55E-11 | 2.18E-10 | 5830.89  | not significant |
| 9891 | C15orf52   | 1.17 | 7.74E-02 | 1.22E-01 | 18.88    | not significant |
| 9892 | ZC4H2      | 1.17 | 7.90E-06 | 2.66E-05 | 1233.83  | not significant |
| 9893 | SEC61A2    | 1.17 | 8.56E-03 | 1.70E-02 | 295.17   | not significant |
| 9894 | USP12      | 1.17 | 6.09E-09 | 2.98E-08 | 2664.77  | not significant |
| 9895 | EEF1D      | 1.17 | 1.37E-11 | 8.72E-11 | 14261.67 | not significant |
| 9896 | STARD3     | 1.17 | 1.16E-09 | 6.07E-09 | 2862.21  | not significant |
| 9897 | ZNF75D     | 1.17 | 8.83E-02 | 1.37E-01 | 48.34    | not significant |
| 9898 | HCN3       | 1.17 | 7.96E-02 | 1.25E-01 | 21.70    | not significant |
| 9899 | ANKHD1     | 1.17 | 2.22E-02 | 4.03E-02 | 228.02   | not significant |
| 9900 | ABHD17B    | 1.17 | 1.68E-08 | 7.83E-08 | 2093.25  | not significant |
| 9901 | PHLPP1     | 1.17 | 2.79E-02 | 4.96E-02 | 180.83   | not significant |
| 9902 | ZNF226     | 1.17 | 6.50E-04 | 1.60E-03 | 575.13   | not significant |
| 9903 | PHKG1      | 1.17 | 8.86E-02 | 1.37E-01 | 47.77    | not significant |
| 9904 | JADE1      | 1.17 | 4.48E-08 | 2.00E-07 | 2516.12  | not significant |
| 9905 | SENP7      | 1.17 | 1.02E-06 | 3.85E-06 | 1484.77  | not significant |
| 9906 | PEX13      | 1.17 | 9.54E-04 | 2.29E-03 | 558.82   | not significant |
| 9907 | ASXL1      | 1.17 | 5.13E-10 | 2.81E-09 | 6856.16  | not significant |
| 9908 | ZNF836     | 1.17 | 1.45E-02 | 2.75E-02 | 290.91   | not significant |
| 9909 | SEPW1      | 1.17 | 1.24E-07 | 5.23E-07 | 2805.90  | not significant |
| 9910 | EBLN3      | 1.17 | 7.60E-11 | 4.51E-10 | 3672.37  | not significant |
| 9911 | TIPARP-AS1 | 1.17 | 5.67E-02 | 9.27E-02 | 14.08    | not significant |
| 9912 | ZDHHC13    | 1.17 | 3.45E-06 | 1.22E-05 | 1210.70  | not significant |
| 9913 | MAP4K3     | 1.17 | 1.57E-04 | 4.37E-04 | 772.00   | not significant |
| 9914 | ZNF518A    | 1.17 | 6.41E-02 | 1.03E-01 | 85.56    | not significant |
| 9915 | ARRDC3-AS1 | 1.17 | 8.65E-02 | 1.35E-01 | 28.66    | not significant |
| 9916 | ZNF395     | 1.18 | 3.26E-11 | 2.00E-10 | 3501.72  | not significant |
| 9917 | LDLRAD4    | 1.18 | 4.40E-15 | 3.84E-14 | 7896.51  | not significant |
| 9918 | TMEFF1     | 1.18 | 8.52E-02 | 1.33E-01 | 30.21    | not significant |
| 9919 | CBX5       | 1.18 | 1.46E-11 | 9.28E-11 | 24273.90 | not significant |
| 9920 | COIL       | 1.18 | 7.46E-06 | 2.52E-05 | 1350.56  | not significant |
| 9921 | UBE2R2     | 1.18 | 1.10E-14 | 9.22E-14 | 5807.35  | not significant |
| 9922 | RPL19      | 1.18 | 1.43E-10 | 8.26E-10 | 52827.59 | not significant |
| 9923 | SPRYD4     | 1.18 | 1.13E-02 | 2.19E-02 | 267.96   | not significant |
| 9924 | RAB40C     | 1.18 | 3.68E-04 | 9.56E-04 | 600.98   | not significant |
| 9925 | GOLGA6L5P  | 1.18 | 4.90E-02 | 8.16E-02 | 12.55    | not significant |
| 9926 | ZNF420     | 1.18 | 4.14E-03 | 8.83E-03 | 367.95   | not significant |
| 9927 | RLTPR      | 1.18 | 8.08E-10 | 4.30E-09 | 9290.34  | not significant |
| 9928 | NFATC2IP   | 1.18 | 1.76E-02 | 3.27E-02 | 3449.70  | not significant |
| 9929 | RPS6       | 1.18 | 3.51E-09 | 1.76E-08 | 68179.33 | not significant |
| 9930 | CARNS1     | 1.18 | 7.12E-02 | 1.13E-01 | 71.32    | not significant |
| 9931 | ZDHHC4     | 1.18 | 2.98E-06 | 1.06E-05 | 1603.72  | not significant |
| 9932 | VEZF1      | 1.18 | 1.46E-12 | 1.02E-11 | 4260.28  | not significant |

|       |              |      |          |          |          |                 |
|-------|--------------|------|----------|----------|----------|-----------------|
| 9933  | MRPS27       | 1.18 | 8.28E-12 | 5.39E-11 | 3943.96  | not significant |
| 9934  | ABHD16A      | 1.18 | 5.40E-05 | 1.62E-04 | 980.88   | not significant |
| 9935  | RPS3A        | 1.18 | 2.40E-03 | 5.33E-03 | 18091.03 | not significant |
| 9936  | EAF1         | 1.18 | 1.17E-08 | 5.55E-08 | 2259.67  | not significant |
| 9937  | TSPYL1       | 1.18 | 3.24E-08 | 1.47E-07 | 2107.17  | not significant |
| 9938  | WDR54        | 1.18 | 8.08E-05 | 2.35E-04 | 775.60   | not significant |
| 9939  | ZNF283       | 1.18 | 4.07E-02 | 6.91E-02 | 134.00   | not significant |
| 9940  | H1FX         | 1.18 | 4.03E-04 | 1.04E-03 | 12443.20 | not significant |
| 9941  | ADI1         | 1.18 | 9.32E-08 | 4.00E-07 | 2541.48  | not significant |
| 9942  | CRACR2A      | 1.18 | 1.01E-04 | 2.90E-04 | 743.14   | not significant |
| 9943  | ZSCAN4       | 1.18 | 5.99E-02 | 9.73E-02 | 19.20    | not significant |
| 9944  | GUSB         | 1.18 | 3.04E-09 | 1.54E-08 | 2604.42  | not significant |
| 9945  | VGLL4        | 1.18 | 8.32E-09 | 4.03E-08 | 2107.18  | not significant |
| 9946  | FBXL15       | 1.18 | 1.33E-02 | 2.54E-02 | 246.51   | not significant |
| 9947  | ENTPD4       | 1.18 | 4.61E-07 | 1.82E-06 | 2719.20  | not significant |
| 9948  | TMEM260      | 1.18 | 3.70E-04 | 9.60E-04 | 595.22   | not significant |
| 9949  | MACROD1      | 1.18 | 4.60E-03 | 9.73E-03 | 376.49   | not significant |
| 9950  | ZNF564       | 1.18 | 5.73E-03 | 1.19E-02 | 313.91   | not significant |
| 9951  | CDS2         | 1.18 | 7.29E-13 | 5.20E-12 | 4409.59  | not significant |
| 9952  | TPRG1L       | 1.18 | 1.11E-04 | 3.15E-04 | 766.75   | not significant |
| 9953  | C1orf112     | 1.18 | 7.56E-08 | 3.27E-07 | 1870.55  | not significant |
| 9954  | XRN1         | 1.18 | 4.98E-08 | 2.21E-07 | 2855.80  | not significant |
| 9955  | POT1-AS1     | 1.18 | 7.82E-02 | 1.23E-01 | 22.39    | not significant |
| 9956  | PGLS         | 1.18 | 1.15E-08 | 5.49E-08 | 2645.74  | not significant |
| 9957  | PRRT3        | 1.18 | 7.53E-02 | 1.19E-01 | 66.64    | not significant |
| 9958  | TAOK2        | 1.18 | 2.22E-09 | 1.14E-08 | 3293.21  | not significant |
| 9959  | SCAMP4       | 1.18 | 1.30E-06 | 4.87E-06 | 1874.79  | not significant |
| 9960  | ZNF492       | 1.18 | 2.52E-02 | 4.51E-02 | 166.08   | not significant |
| 9961  | ELF2         | 1.18 | 7.55E-07 | 2.89E-06 | 1454.78  | not significant |
| 9962  | ZNF688       | 1.18 | 1.84E-02 | 3.41E-02 | 199.07   | not significant |
| 9963  | CUL9         | 1.18 | 1.45E-02 | 2.74E-02 | 1649.63  | not significant |
| 9964  | SDCBP        | 1.18 | 4.70E-10 | 2.59E-09 | 3583.92  | not significant |
| 9965  | ASH2L        | 1.18 | 1.05E-10 | 6.17E-10 | 3626.26  | not significant |
| 9966  | ZACN         | 1.18 | 7.72E-02 | 1.22E-01 | 25.88    | not significant |
| 9967  | PEX11B       | 1.18 | 6.57E-02 | 1.06E-01 | 84.02    | not significant |
| 9968  | ALG10        | 1.18 | 1.31E-03 | 3.07E-03 | 458.61   | not significant |
| 9969  | LEPROT       | 1.18 | 3.34E-04 | 8.73E-04 | 612.30   | not significant |
| 9970  | KIFC2        | 1.18 | 1.49E-02 | 2.82E-02 | 1128.36  | not significant |
| 9971  | DLST         | 1.18 | 1.95E-13 | 1.46E-12 | 4451.09  | not significant |
| 9972  | PNMA2        | 1.18 | 3.79E-10 | 2.10E-09 | 2955.31  | not significant |
| 9973  | NDST2        | 1.18 | 2.48E-06 | 8.94E-06 | 1382.31  | not significant |
| 9974  | PER2         | 1.18 | 8.47E-06 | 2.84E-05 | 1074.22  | not significant |
| 9975  | AP1G2        | 1.18 | 4.12E-06 | 1.44E-05 | 2415.49  | not significant |
| 9976  | EME2         | 1.18 | 4.15E-02 | 7.04E-02 | 120.83   | not significant |
| 9977  | RPLP0        | 1.18 | 3.03E-12 | 2.05E-11 | 53871.84 | not significant |
| 9978  | CERS5        | 1.18 | 4.65E-07 | 1.83E-06 | 1988.57  | not significant |
| 9979  | ZMYM2        | 1.18 | 3.23E-11 | 1.99E-10 | 5090.00  | not significant |
| 9980  | FBXL13       | 1.18 | 7.95E-02 | 1.25E-01 | 51.74    | not significant |
| 9981  | CCNT2-AS1    | 1.18 | 3.30E-02 | 5.76E-02 | 142.45   | not significant |
| 9982  | GF11         | 1.18 | 2.08E-07 | 8.53E-07 | 1596.17  | not significant |
| 9983  | PGM2L1       | 1.18 | 1.90E-06 | 6.95E-06 | 1519.26  | not significant |
| 9984  | 43716_7153   | 1.18 | 3.95E-15 | 3.45E-14 | 6195.91  | not significant |
| 9985  | RBM38        | 1.18 | 2.89E-04 | 7.62E-04 | 652.90   | not significant |
| 9986  | PLEKHM2      | 1.18 | 6.45E-10 | 3.49E-09 | 2646.54  | not significant |
| 9987  | XAB2         | 1.18 | 4.33E-09 | 2.15E-08 | 2614.55  | not significant |
| 9988  | ZNF33A       | 1.18 | 2.95E-07 | 1.19E-06 | 2234.74  | not significant |
| 9989  | SERPINB1     | 1.18 | 6.20E-11 | 3.71E-10 | 3629.64  | not significant |
| 9990  | WIBG         | 1.18 | 3.55E-05 | 1.09E-04 | 833.92   | not significant |
| 9991  | GLTSCR1L     | 1.18 | 3.50E-06 | 1.24E-05 | 1174.97  | not significant |
| 9992  | DHRS7        | 1.18 | 1.23E-05 | 4.04E-05 | 1249.68  | not significant |
| 9993  | CTSF         | 1.18 | 6.99E-02 | 1.11E-01 | 19.75    | not significant |
| 9994  | MTERF4       | 1.18 | 4.37E-06 | 1.52E-05 | 1144.76  | not significant |
| 9995  | EBLN2        | 1.18 | 5.98E-02 | 9.72E-02 | 91.99    | not significant |
| 9996  | CHMP6        | 1.18 | 5.25E-05 | 1.57E-04 | 819.30   | not significant |
| 9997  | FAM73B       | 1.18 | 7.81E-06 | 2.63E-05 | 1101.66  | not significant |
| 9998  | SUMO2        | 1.18 | 1.59E-12 | 1.10E-11 | 8577.46  | not significant |
| 9999  | LYRM9        | 1.18 | 7.64E-02 | 1.21E-01 | 50.66    | not significant |
| 10000 | VCPKMT       | 1.18 | 1.17E-03 | 2.76E-03 | 493.41   | not significant |
| 10001 | LINC00959    | 1.18 | 5.79E-02 | 9.44E-02 | 86.07    | not significant |
| 10002 | ARHGEF18     | 1.18 | 1.46E-10 | 8.41E-10 | 3749.02  | not significant |
| 10003 | LOC100996437 | 1.18 | 4.87E-02 | 8.13E-02 | 13.46    | not significant |
| 10004 | FAM117B      | 1.18 | 4.98E-06 | 1.72E-05 | 1381.65  | not significant |
| 10005 | PIP5K1C      | 1.18 | 3.02E-06 | 1.07E-05 | 1197.99  | not significant |
| 10006 | ARID4B       | 1.18 | 3.17E-09 | 1.60E-08 | 2688.50  | not significant |
| 10007 | FIGNL1       | 1.18 | 1.01E-08 | 4.84E-08 | 2861.85  | not significant |
| 10008 | FLJ42627     | 1.18 | 3.71E-02 | 6.36E-02 | 122.63   | not significant |
| 10009 | ANKRD13A     | 1.18 | 3.73E-14 | 2.99E-13 | 5575.82  | not significant |
| 10010 | FAM66B       | 1.18 | 7.68E-02 | 1.21E-01 | 53.16    | not significant |
| 10011 | PROX1        | 1.18 | 6.56E-02 | 1.06E-01 | 72.36    | not significant |
| 10012 | FAM110C      | 1.18 | 7.69E-03 | 1.55E-02 | 263.42   | not significant |
| 10013 | PCYT1B       | 1.18 | 2.26E-02 | 4.10E-02 | 166.17   | not significant |
| 10014 | DCK          | 1.18 | 2.31E-17 | 2.42E-16 | 8943.01  | not significant |
| 10015 | YAF2         | 1.18 | 6.80E-06 | 2.31E-05 | 1198.75  | not significant |
| 10016 | ENDOV        | 1.18 | 1.50E-02 | 2.84E-02 | 208.16   | not significant |
| 10017 | TRAF6        | 1.18 | 1.15E-05 | 3.80E-05 | 970.66   | not significant |
| 10018 | MFSD8        | 1.18 | 4.35E-04 | 1.12E-03 | 600.67   | not significant |
| 10019 | FAM133B      | 1.18 | 7.66E-02 | 1.21E-01 | 48.41    | not significant |
| 10020 | PKN2         | 1.18 | 1.95E-05 | 6.22E-05 | 1714.32  | not significant |

|       |               |      |          |          |          |                 |
|-------|---------------|------|----------|----------|----------|-----------------|
| 10021 | HAGH          | 1.18 | 5.38E-05 | 1.61E-04 | 949.50   | not significant |
| 10022 | TNRC6C        | 1.18 | 4.98E-11 | 3.01E-10 | 3469.98  | not significant |
| 10023 | LRRC14        | 1.18 | 1.95E-07 | 8.05E-07 | 1910.51  | not significant |
| 10024 | LIG1          | 1.18 | 1.73E-13 | 1.31E-12 | 6690.66  | not significant |
| 10025 | LRIG2         | 1.18 | 2.75E-04 | 7.30E-04 | 690.93   | not significant |
| 10026 | PYGO2         | 1.18 | 3.21E-09 | 1.61E-08 | 2292.19  | not significant |
| 10027 | ZBTB10        | 1.18 | 6.70E-07 | 2.59E-06 | 1286.51  | not significant |
| 10028 | SYCP2         | 1.18 | 1.75E-02 | 3.24E-02 | 3760.24  | not significant |
| 10029 | KBTBD4        | 1.18 | 7.30E-06 | 2.47E-05 | 981.78   | not significant |
| 10030 | CCDC57        | 1.18 | 2.07E-05 | 6.59E-05 | 944.72   | not significant |
| 10031 | SCNN1D        | 1.18 | 5.68E-02 | 9.29E-02 | 107.40   | not significant |
| 10032 | KDM2B         | 1.18 | 6.21E-07 | 2.41E-06 | 1246.83  | not significant |
| 10033 | MEGF9         | 1.18 | 1.05E-08 | 5.01E-08 | 2350.20  | not significant |
| 10034 | MAN2B1        | 1.18 | 5.26E-07 | 2.06E-06 | 1488.73  | not significant |
| 10035 | ANKLE1        | 1.18 | 6.28E-08 | 2.75E-07 | 1603.98  | not significant |
| 10036 | LAMB2P1       | 1.18 | 7.26E-02 | 1.15E-01 | 21.85    | not significant |
| 10037 | GABARAP       | 1.18 | 1.53E-09 | 7.94E-09 | 3439.67  | not significant |
| 10038 | GPR63         | 1.18 | 7.85E-05 | 2.29E-04 | 887.69   | not significant |
| 10039 | TMCC1-AS1     | 1.18 | 3.07E-02 | 5.39E-02 | 138.51   | not significant |
| 10040 | TNKS2         | 1.18 | 7.26E-12 | 4.75E-11 | 4469.88  | not significant |
| 10041 | IRX3          | 1.18 | 1.36E-05 | 4.44E-05 | 888.13   | not significant |
| 10042 | SNX10         | 1.18 | 2.58E-06 | 9.27E-06 | 1332.01  | not significant |
| 10043 | ZNF587        | 1.18 | 3.66E-05 | 1.12E-04 | 1060.81  | not significant |
| 10044 | CCSAP         | 1.18 | 6.19E-12 | 4.08E-11 | 3818.36  | not significant |
| 10045 | CCDC69        | 1.18 | 3.43E-09 | 1.72E-08 | 3248.66  | not significant |
| 10046 | SUPT3H        | 1.19 | 9.10E-06 | 3.04E-05 | 1053.57  | not significant |
| 10047 | SIAH1         | 1.19 | 1.95E-04 | 5.31E-04 | 640.06   | not significant |
| 10048 | NRL           | 1.19 | 5.01E-02 | 8.33E-02 | 92.63    | not significant |
| 10049 | TAPBP         | 1.19 | 1.23E-05 | 4.03E-05 | 978.78   | not significant |
| 10050 | KLC4          | 1.19 | 5.58E-04 | 1.40E-03 | 557.87   | not significant |
| 10051 | UBQLN2        | 1.19 | 8.23E-07 | 3.14E-06 | 2079.03  | not significant |
| 10052 | TELO2         | 1.19 | 7.20E-08 | 3.12E-07 | 1914.22  | not significant |
| 10053 | RRP7B         | 1.19 | 9.30E-04 | 2.24E-03 | 583.32   | not significant |
| 10054 | ACAD8         | 1.19 | 1.10E-05 | 3.63E-05 | 946.03   | not significant |
| 10055 | ZFP82         | 1.19 | 3.81E-04 | 9.88E-04 | 563.65   | not significant |
| 10056 | ZNF776        | 1.19 | 2.66E-07 | 1.08E-06 | 1365.02  | not significant |
| 10057 | PTAR1         | 1.19 | 1.02E-07 | 4.37E-07 | 2477.95  | not significant |
| 10058 | IFI27L1       | 1.19 | 2.25E-03 | 5.03E-03 | 392.10   | not significant |
| 10059 | SFMBT1        | 1.19 | 3.88E-08 | 1.74E-07 | 1777.88  | not significant |
| 10060 | PTPRJ         | 1.19 | 3.32E-02 | 5.77E-02 | 9.52     | not significant |
| 10061 | P2RX5-TAX1BP3 | 1.19 | 1.34E-02 | 2.56E-02 | 209.04   | not significant |
| 10062 | CTSD          | 1.19 | 1.14E-11 | 7.33E-11 | 4975.74  | not significant |
| 10063 | YIPF3         | 1.19 | 5.00E-10 | 2.74E-09 | 2253.23  | not significant |
| 10064 | ZBTB4         | 1.19 | 3.79E-06 | 1.33E-05 | 1216.46  | not significant |
| 10065 | PODXL         | 1.19 | 7.35E-03 | 1.48E-02 | 274.88   | not significant |
| 10066 | HOOK2         | 1.19 | 4.07E-02 | 6.90E-02 | 114.33   | not significant |
| 10067 | SLC23A2       | 1.19 | 3.47E-10 | 1.94E-09 | 3233.42  | not significant |
| 10068 | THAP9-AS1     | 1.19 | 4.96E-05 | 1.49E-04 | 1157.63  | not significant |
| 10069 | RFX5          | 1.19 | 4.58E-13 | 3.32E-12 | 3821.96  | not significant |
| 10070 | PIWIL4        | 1.19 | 5.06E-02 | 8.40E-02 | 88.74    | not significant |
| 10071 | FAM200B       | 1.19 | 3.19E-04 | 8.38E-04 | 570.11   | not significant |
| 10072 | ZNF284        | 1.19 | 2.29E-02 | 4.14E-02 | 167.35   | not significant |
| 10073 | FBN1          | 1.19 | 1.21E-03 | 2.85E-03 | 439.35   | not significant |
| 10074 | PLEKHM1       | 1.19 | 3.52E-07 | 1.41E-06 | 1304.83  | not significant |
| 10075 | SIRT1         | 1.19 | 5.74E-07 | 2.23E-06 | 1358.52  | not significant |
| 10076 | MAD2L2        | 1.19 | 4.82E-11 | 2.93E-10 | 6551.58  | not significant |
| 10077 | KPNA5         | 1.19 | 1.31E-03 | 3.07E-03 | 463.49   | not significant |
| 10078 | LDOC1L        | 1.19 | 7.15E-15 | 6.13E-14 | 7116.54  | not significant |
| 10079 | RCCD1         | 1.19 | 1.89E-06 | 6.92E-06 | 1102.08  | not significant |
| 10080 | HKDC1         | 1.19 | 5.14E-02 | 8.52E-02 | 83.63    | not significant |
| 10081 | ZBTB6         | 1.19 | 2.45E-04 | 6.56E-04 | 608.51   | not significant |
| 10082 | TMEM87A       | 1.19 | 1.20E-08 | 5.68E-08 | 1900.91  | not significant |
| 10083 | GDF9          | 1.19 | 7.69E-02 | 1.21E-01 | 38.98    | not significant |
| 10084 | IKZF1         | 1.19 | 4.97E-18 | 5.53E-17 | 16264.70 | not significant |
| 10085 | SLC25A14      | 1.19 | 3.42E-04 | 8.94E-04 | 534.87   | not significant |
| 10086 | PPP1R37       | 1.19 | 1.92E-05 | 6.14E-05 | 837.11   | not significant |
| 10087 | ZIK1          | 1.19 | 5.14E-06 | 1.77E-05 | 1099.75  | not significant |
| 10088 | NAA40         | 1.19 | 9.50E-09 | 4.57E-08 | 2018.99  | not significant |
| 10089 | TTC28-AS1     | 1.19 | 9.69E-05 | 2.79E-04 | 803.65   | not significant |
| 10090 | FBRSL1        | 1.19 | 7.24E-11 | 4.31E-10 | 3155.83  | not significant |
| 10091 | STRIP2        | 1.19 | 5.07E-03 | 1.06E-02 | 428.16   | not significant |
| 10092 | TMEM79        | 1.19 | 9.38E-03 | 1.85E-02 | 233.20   | not significant |
| 10093 | HINT1         | 1.19 | 7.90E-12 | 5.16E-11 | 11734.29 | not significant |
| 10094 | LPGAT1        | 1.19 | 2.23E-09 | 1.14E-08 | 2155.16  | not significant |
| 10095 | RPL32         | 1.19 | 1.88E-13 | 1.41E-12 | 22244.01 | not significant |
| 10096 | ZNF384        | 1.19 | 8.04E-12 | 5.25E-11 | 3002.63  | not significant |
| 10097 | KHNYN         | 1.19 | 1.47E-09 | 7.62E-09 | 3234.19  | not significant |
| 10098 | FXR1          | 1.19 | 2.18E-12 | 1.50E-11 | 6033.27  | not significant |
| 10099 | GVINP1        | 1.19 | 6.06E-05 | 1.80E-04 | 1044.96  | not significant |
| 10100 | HNRNPA0       | 1.19 | 6.76E-10 | 3.65E-09 | 18338.51 | not significant |
| 10101 | FANCA         | 1.19 | 2.51E-03 | 5.58E-03 | 2330.80  | not significant |
| 10102 | SULT1A1       | 1.19 | 8.21E-03 | 1.64E-02 | 254.67   | not significant |
| 10103 | SPIN1         | 1.19 | 1.26E-14 | 1.05E-13 | 4999.70  | not significant |
| 10104 | PSMD5-AS1     | 1.19 | 3.63E-08 | 1.64E-07 | 1562.37  | not significant |
| 10105 | SLC25A26      | 1.19 | 1.06E-03 | 2.51E-03 | 456.89   | not significant |
| 10106 | GNE           | 1.19 | 5.48E-09 | 2.69E-08 | 1889.71  | not significant |
| 10107 | CENPU         | 1.19 | 1.26E-12 | 8.84E-12 | 4957.85  | not significant |
| 10108 | INSIG2        | 1.19 | 1.05E-04 | 3.00E-04 | 684.80   | not significant |

|       |              |      |          |          |          |                 |
|-------|--------------|------|----------|----------|----------|-----------------|
| 10109 | RGPD4        | 1.19 | 7.44E-02 | 1.18E-01 | 38.71    | not significant |
| 10110 | FRS2         | 1.19 | 5.69E-07 | 2.21E-06 | 1226.64  | not significant |
| 10111 | VIPAS39      | 1.19 | 2.98E-06 | 1.06E-05 | 1083.46  | not significant |
| 10112 | ZNF671       | 1.19 | 1.94E-04 | 5.29E-04 | 590.90   | not significant |
| 10113 | HTRA2        | 1.19 | 1.18E-06 | 4.42E-06 | 1509.98  | not significant |
| 10114 | CHD1L        | 1.19 | 7.30E-07 | 2.80E-06 | 1323.04  | not significant |
| 10115 | ACAP1        | 1.19 | 3.17E-16 | 3.01E-15 | 6512.33  | not significant |
| 10116 | ACTR1B       | 1.19 | 3.39E-09 | 1.70E-08 | 2384.73  | not significant |
| 10117 | ERN1         | 1.19 | 9.09E-07 | 3.45E-06 | 1236.09  | not significant |
| 10118 | PTRHD1       | 1.19 | 2.78E-04 | 7.36E-04 | 584.41   | not significant |
| 10119 | RAB2B        | 1.19 | 1.93E-05 | 6.18E-05 | 879.70   | not significant |
| 10120 | NUDT9P1      | 1.19 | 7.49E-02 | 1.19E-01 | 33.18    | not significant |
| 10121 | HDGFRP3      | 1.19 | 2.30E-09 | 1.17E-08 | 2490.12  | not significant |
| 10122 | TXNDC15      | 1.19 | 2.52E-07 | 1.03E-06 | 1334.34  | not significant |
| 10123 | CECR1        | 1.19 | 6.74E-12 | 4.42E-11 | 3187.55  | not significant |
| 10124 | BCL7A        | 1.19 | 1.07E-13 | 8.20E-13 | 4293.27  | not significant |
| 10125 | C3orf17      | 1.19 | 1.34E-09 | 7.00E-09 | 1964.24  | not significant |
| 10126 | VNN2         | 1.19 | 5.53E-03 | 1.15E-02 | 273.87   | not significant |
| 10127 | WDR6         | 1.19 | 1.20E-14 | 1.00E-13 | 8775.74  | not significant |
| 10128 | MAN1A1       | 1.19 | 6.71E-14 | 5.25E-13 | 4851.99  | not significant |
| 10129 | TBCEL        | 1.19 | 1.43E-03 | 3.33E-03 | 406.92   | not significant |
| 10130 | ALG12        | 1.19 | 1.30E-05 | 4.27E-05 | 946.61   | not significant |
| 10131 | CCNT2        | 1.19 | 1.67E-08 | 7.79E-08 | 2590.61  | not significant |
| 10132 | SVIP         | 1.19 | 6.99E-06 | 2.37E-05 | 885.18   | not significant |
| 10133 | SLAMF6       | 1.19 | 1.87E-07 | 7.75E-07 | 1737.67  | not significant |
| 10134 | FAM73A       | 1.19 | 1.26E-04 | 3.55E-04 | 648.34   | not significant |
| 10135 | ATXN2L       | 1.19 | 7.97E-11 | 4.73E-10 | 16013.74 | not significant |
| 10136 | NTSR1        | 1.19 | 6.74E-03 | 1.37E-02 | 245.02   | not significant |
| 10137 | ZNF169       | 1.19 | 5.50E-02 | 9.04E-02 | 77.18    | not significant |
| 10138 | TMEM59       | 1.19 | 6.90E-09 | 3.36E-08 | 2797.86  | not significant |
| 10139 | KIAA2026     | 1.19 | 6.43E-06 | 2.19E-05 | 1107.79  | not significant |
| 10140 | ZFX          | 1.19 | 9.93E-08 | 4.25E-07 | 1575.46  | not significant |
| 10141 | PHF1         | 1.19 | 2.83E-03 | 6.23E-03 | 333.01   | not significant |
| 10142 | USP3         | 1.19 | 4.77E-07 | 1.88E-06 | 1265.10  | not significant |
| 10143 | TMEM234      | 1.19 | 4.90E-02 | 8.16E-02 | 88.99    | not significant |
| 10144 | EIF3H        | 1.19 | 2.55E-12 | 1.74E-11 | 12763.97 | not significant |
| 10145 | ZNF451       | 1.19 | 1.41E-08 | 6.61E-08 | 2145.38  | not significant |
| 10146 | FBXO8        | 1.19 | 1.41E-03 | 3.29E-03 | 400.32   | not significant |
| 10147 | SNHG8        | 1.19 | 4.07E-10 | 2.25E-09 | 2305.45  | not significant |
| 10148 | IQGAP3       | 1.19 | 3.55E-02 | 6.12E-02 | 1075.12  | not significant |
| 10149 | TMEM41B      | 1.19 | 9.96E-08 | 4.26E-07 | 1700.55  | not significant |
| 10150 | RMDN3        | 1.19 | 4.69E-08 | 2.09E-07 | 1526.15  | not significant |
| 10151 | BTG3         | 1.19 | 1.27E-06 | 4.77E-06 | 1117.51  | not significant |
| 10152 | C2CD3        | 1.19 | 2.09E-09 | 1.07E-08 | 2236.21  | not significant |
| 10153 | GXYLT1       | 1.19 | 9.52E-11 | 5.60E-10 | 2565.56  | not significant |
| 10154 | KIAA1468     | 1.19 | 1.09E-02 | 2.12E-02 | 1033.11  | not significant |
| 10155 | ASB3         | 1.19 | 5.19E-02 | 8.59E-02 | 74.29    | not significant |
| 10156 | EXT2         | 1.19 | 3.95E-07 | 1.57E-06 | 1463.96  | not significant |
| 10157 | RPS15        | 1.19 | 3.48E-11 | 2.13E-10 | 11754.56 | not significant |
| 10158 | SCAMP1       | 1.19 | 4.05E-09 | 2.02E-08 | 1811.58  | not significant |
| 10159 | LOC645513    | 1.19 | 4.86E-03 | 1.02E-02 | 281.22   | not significant |
| 10160 | IGSF8        | 1.19 | 3.45E-07 | 1.38E-06 | 1261.69  | not significant |
| 10161 | NCSTN        | 1.19 | 1.91E-08 | 8.86E-08 | 2147.17  | not significant |
| 10162 | ZNF367       | 1.19 | 1.45E-09 | 7.52E-09 | 1891.86  | not significant |
| 10163 | ANO9         | 1.19 | 4.80E-02 | 8.02E-02 | 97.53    | not significant |
| 10164 | FYB          | 1.19 | 1.65E-14 | 1.36E-13 | 5537.57  | not significant |
| 10165 | ST13         | 1.19 | 6.49E-18 | 7.13E-17 | 9787.14  | not significant |
| 10166 | USF2         | 1.19 | 8.03E-12 | 5.24E-11 | 4100.71  | not significant |
| 10167 | GBP3         | 1.19 | 1.21E-04 | 3.42E-04 | 590.48   | not significant |
| 10168 | LOC100128288 | 1.19 | 6.73E-02 | 1.08E-01 | 55.95    | not significant |
| 10169 | CBL          | 1.19 | 7.92E-10 | 4.23E-09 | 6082.81  | not significant |
| 10170 | NPHP4        | 1.19 | 2.36E-06 | 8.51E-06 | 1200.67  | not significant |
| 10171 | GOLGA2P5     | 1.19 | 1.91E-02 | 3.51E-02 | 1125.73  | not significant |
| 10172 | OXA1L        | 1.19 | 5.57E-14 | 4.39E-13 | 3459.05  | not significant |
| 10173 | HIATL2       | 1.19 | 3.71E-02 | 6.37E-02 | 106.82   | not significant |
| 10174 | PEX16        | 1.19 | 8.13E-05 | 2.37E-04 | 673.23   | not significant |
| 10175 | ZNF260       | 1.19 | 9.19E-09 | 4.44E-08 | 1743.78  | not significant |
| 10176 | PRRC2B       | 1.19 | 9.27E-18 | 1.01E-16 | 7856.89  | not significant |
| 10177 | ZNF354B      | 1.20 | 1.36E-03 | 3.17E-03 | 459.60   | not significant |
| 10178 | MEAF6        | 1.20 | 2.60E-12 | 1.77E-11 | 3391.88  | not significant |
| 10179 | NUDT16L1     | 1.20 | 1.66E-05 | 5.36E-05 | 920.74   | not significant |
| 10180 | GPR137       | 1.20 | 2.23E-05 | 7.06E-05 | 818.25   | not significant |
| 10181 | MZT2B        | 1.20 | 5.56E-04 | 1.40E-03 | 3765.61  | not significant |
| 10182 | LOC653160    | 1.20 | 6.54E-02 | 1.05E-01 | 65.82    | not significant |
| 10183 | SETD1B       | 1.20 | 1.48E-11 | 9.39E-11 | 3861.62  | not significant |
| 10184 | UCK1         | 1.20 | 4.52E-07 | 1.79E-06 | 1333.87  | not significant |
| 10185 | FANCI        | 1.20 | 3.89E-18 | 4.37E-17 | 6647.88  | not significant |
| 10186 | BRIP1        | 1.20 | 1.36E-15 | 1.24E-14 | 4635.83  | not significant |
| 10187 | ZNF490       | 1.20 | 5.37E-03 | 1.12E-02 | 264.11   | not significant |
| 10188 | ZNF184       | 1.20 | 3.52E-07 | 1.41E-06 | 1182.11  | not significant |
| 10189 | ZXDA         | 1.20 | 1.52E-02 | 2.86E-02 | 173.34   | not significant |
| 10190 | GPHN         | 1.20 | 5.53E-02 | 9.08E-02 | 17.05    | not significant |
| 10191 | ATXN7L2      | 1.20 | 1.11E-03 | 2.64E-03 | 402.01   | not significant |
| 10192 | TP53         | 1.20 | 1.57E-15 | 1.41E-14 | 6058.10  | not significant |
| 10193 | TONSL        | 1.20 | 1.94E-08 | 9.02E-08 | 3151.39  | not significant |
| 10194 | TRIM45       | 1.20 | 6.44E-02 | 1.04E-01 | 50.40    | not significant |
| 10195 | EFCAB5       | 1.20 | 2.46E-02 | 4.41E-02 | 143.08   | not significant |
| 10196 | SPSB1        | 1.20 | 3.70E-05 | 1.14E-04 | 704.26   | not significant |

|       |              |      |          |          |          |                 |
|-------|--------------|------|----------|----------|----------|-----------------|
| 10197 | PNPLA2       | 1.20 | 1.92E-07 | 7.96E-07 | 1557.82  | not significant |
| 10198 | ENOSF1       | 1.20 | 8.47E-06 | 2.84E-05 | 1366.82  | not significant |
| 10199 | PP7080       | 1.20 | 1.76E-05 | 5.65E-05 | 783.99   | not significant |
| 10200 | EHMT2        | 1.20 | 5.41E-11 | 3.26E-10 | 2527.24  | not significant |
| 10201 | RPL27A       | 1.20 | 1.32E-12 | 9.24E-12 | 19669.54 | not significant |
| 10202 | KLHL9        | 1.20 | 8.66E-11 | 5.11E-10 | 2426.16  | not significant |
| 10203 | PHACTR3      | 1.20 | 3.19E-10 | 1.78E-09 | 3026.46  | not significant |
| 10204 | ZNF136       | 1.20 | 2.14E-05 | 6.77E-05 | 988.00   | not significant |
| 10205 | LOC100507053 | 1.20 | 6.36E-02 | 1.03E-01 | 20.92    | not significant |
| 10206 | MZT1         | 1.20 | 6.58E-12 | 4.33E-11 | 3707.20  | not significant |
| 10207 | AP5Z1        | 1.20 | 1.31E-07 | 5.49E-07 | 1601.39  | not significant |
| 10208 | ORAI3        | 1.20 | 5.97E-03 | 1.23E-02 | 280.52   | not significant |
| 10209 | ZNF268       | 1.20 | 1.48E-06 | 5.51E-06 | 1477.64  | not significant |
| 10210 | HDAC6        | 1.20 | 9.31E-05 | 2.69E-04 | 662.29   | not significant |
| 10211 | LOC100289230 | 1.20 | 6.96E-02 | 1.11E-01 | 35.04    | not significant |
| 10212 | ANKZF1       | 1.20 | 2.36E-06 | 8.52E-06 | 1164.35  | not significant |
| 10213 | NIN          | 1.20 | 5.53E-14 | 4.36E-13 | 4200.38  | not significant |
| 10214 | RNF144A      | 1.20 | 1.84E-15 | 1.64E-14 | 4256.21  | not significant |
| 10215 | NFKBIZ       | 1.20 | 6.65E-02 | 1.07E-01 | 45.98    | not significant |
| 10216 | KLF5         | 1.20 | 1.48E-02 | 2.80E-02 | 172.16   | not significant |
| 10217 | SH3YL1       | 1.20 | 1.69E-04 | 4.67E-04 | 604.50   | not significant |
| 10218 | AP5B1        | 1.20 | 2.74E-07 | 1.11E-06 | 1536.78  | not significant |
| 10219 | C10orf35     | 1.20 | 1.05E-02 | 2.06E-02 | 208.30   | not significant |
| 10220 | TMEM194B     | 1.20 | 1.53E-07 | 6.40E-07 | 1384.62  | not significant |
| 10221 | RPL5         | 1.20 | 3.57E-15 | 3.14E-14 | 35246.85 | not significant |
| 10222 | TRIM23       | 1.20 | 3.94E-04 | 1.02E-03 | 483.71   | not significant |
| 10223 | KIAA1109     | 1.20 | 3.15E-09 | 1.59E-08 | 2893.14  | not significant |
| 10224 | VAMP2        | 1.20 | 3.41E-08 | 1.54E-07 | 1512.63  | not significant |
| 10225 | FKRP         | 1.20 | 1.15E-05 | 3.80E-05 | 843.20   | not significant |
| 10226 | ZNF133       | 1.20 | 3.40E-03 | 7.37E-03 | 305.48   | not significant |
| 10227 | SLC30A7      | 1.20 | 2.41E-06 | 8.69E-06 | 1731.55  | not significant |
| 10228 | ZC3H12B      | 1.20 | 1.10E-02 | 2.15E-02 | 193.48   | not significant |
| 10229 | GPATCH2L     | 1.20 | 4.94E-09 | 2.45E-08 | 2208.82  | not significant |
| 10230 | EML3         | 1.20 | 1.25E-08 | 5.91E-08 | 2145.45  | not significant |
| 10231 | UBXN11       | 1.20 | 1.42E-03 | 3.30E-03 | 411.62   | not significant |
| 10232 | ZKSCAN2      | 1.20 | 1.06E-05 | 3.51E-05 | 845.20   | not significant |
| 10233 | PHACTR2      | 1.20 | 4.26E-02 | 7.21E-02 | 89.66    | not significant |
| 10234 | POGZ         | 1.20 | 2.86E-04 | 7.56E-04 | 4188.93  | not significant |
| 10235 | RAB4A        | 1.20 | 6.59E-07 | 2.55E-06 | 1270.64  | not significant |
| 10236 | GRINA        | 1.20 | 3.18E-03 | 6.94E-03 | 309.18   | not significant |
| 10237 | CEP72        | 1.20 | 2.62E-05 | 8.21E-05 | 708.99   | not significant |
| 10238 | DHX40        | 1.20 | 8.76E-13 | 6.22E-12 | 2784.16  | not significant |
| 10239 | ZHX1-C8orf76 | 1.20 | 6.66E-02 | 1.07E-01 | 31.78    | not significant |
| 10240 | LOC101927497 | 1.20 | 5.89E-08 | 2.59E-07 | 1407.31  | not significant |
| 10241 | BTBD8        | 1.20 | 6.25E-02 | 1.01E-01 | 23.30    | not significant |
| 10242 | MST1R        | 1.20 | 4.60E-02 | 7.72E-02 | 80.03    | not significant |
| 10243 | LEF1-AS1     | 1.20 | 9.58E-03 | 1.89E-02 | 291.14   | not significant |
| 10244 | CIRBP        | 1.20 | 2.24E-18 | 2.56E-17 | 6201.20  | not significant |
| 10245 | TESPA1       | 1.20 | 3.70E-18 | 4.17E-17 | 11307.99 | not significant |
| 10246 | SFR1         | 1.20 | 2.17E-03 | 4.86E-03 | 364.01   | not significant |
| 10247 | C1orf50      | 1.20 | 1.24E-03 | 2.93E-03 | 371.60   | not significant |
| 10248 | ATP5G2       | 1.20 | 1.04E-15 | 9.51E-15 | 10844.20 | not significant |
| 10249 | LUC7L3       | 1.20 | 5.08E-04 | 1.28E-03 | 6343.67  | not significant |
| 10250 | TAS2R5       | 1.20 | 4.65E-02 | 7.81E-02 | 14.27    | not significant |
| 10251 | ZNF747       | 1.20 | 2.64E-05 | 8.25E-05 | 704.53   | not significant |
| 10252 | CENPJ        | 1.20 | 1.84E-07 | 7.60E-07 | 1641.70  | not significant |
| 10253 | ST3GAL4      | 1.20 | 5.93E-07 | 2.30E-06 | 1050.30  | not significant |
| 10254 | PLEKHM3      | 1.20 | 4.93E-05 | 1.48E-04 | 677.29   | not significant |
| 10255 | STAG3L2      | 1.20 | 1.15E-02 | 2.23E-02 | 260.66   | not significant |
| 10256 | LOC285074    | 1.20 | 4.17E-04 | 1.07E-03 | 517.70   | not significant |
| 10257 | ZGRF1        | 1.20 | 1.27E-07 | 5.36E-07 | 2219.00  | not significant |
| 10258 | FAM13B       | 1.20 | 2.27E-12 | 1.56E-11 | 3279.37  | not significant |
| 10259 | CLEC2B       | 1.20 | 2.65E-04 | 7.06E-04 | 561.47   | not significant |
| 10260 | NEDD4L       | 1.20 | 1.68E-02 | 3.14E-02 | 169.36   | not significant |
| 10261 | ZNF677       | 1.20 | 3.64E-02 | 6.27E-02 | 92.85    | not significant |
| 10262 | BIK          | 1.20 | 1.10E-04 | 3.13E-04 | 610.44   | not significant |
| 10263 | LINC01108    | 1.20 | 5.59E-02 | 9.16E-02 | 18.42    | not significant |
| 10264 | DNASE1L1     | 1.20 | 6.53E-02 | 1.05E-01 | 37.86    | not significant |
| 10265 | NUMA1        | 1.20 | 2.51E-10 | 1.42E-09 | 11931.65 | not significant |
| 10266 | ZNF891       | 1.20 | 4.51E-03 | 9.55E-03 | 258.63   | not significant |
| 10267 | RPL29        | 1.20 | 3.01E-14 | 2.43E-13 | 15682.11 | not significant |
| 10268 | LOC642852    | 1.20 | 5.70E-04 | 1.43E-03 | 468.73   | not significant |
| 10269 | CD47         | 1.20 | 4.88E-23 | 7.58E-22 | 10970.87 | not significant |
| 10270 | ARHGAP11B    | 1.20 | 1.13E-02 | 2.19E-02 | 186.25   | not significant |
| 10271 | TTC24        | 1.20 | 2.50E-03 | 5.54E-03 | 322.60   | not significant |
| 10272 | CDC42EP2     | 1.20 | 4.64E-02 | 7.78E-02 | 71.32    | not significant |
| 10273 | TGOLN2       | 1.20 | 2.85E-21 | 3.93E-20 | 9057.99  | not significant |
| 10274 | FCHSD1       | 1.20 | 1.19E-02 | 2.29E-02 | 191.24   | not significant |
| 10275 | SYS1         | 1.20 | 2.76E-07 | 1.12E-06 | 1302.46  | not significant |
| 10276 | PON2         | 1.20 | 9.63E-03 | 1.89E-02 | 218.50   | not significant |
| 10277 | ZNF428       | 1.20 | 1.27E-07 | 5.36E-07 | 1996.66  | not significant |
| 10278 | SLFN11       | 1.20 | 1.78E-16 | 1.74E-15 | 7040.64  | not significant |
| 10279 | SDHAP3       | 1.20 | 2.22E-02 | 4.04E-02 | 143.74   | not significant |
| 10280 | NFKB2        | 1.20 | 9.83E-05 | 2.83E-04 | 655.16   | not significant |
| 10281 | YBEY         | 1.20 | 5.69E-03 | 1.18E-02 | 241.20   | not significant |
| 10282 | PTGER3       | 1.20 | 6.41E-02 | 1.03E-01 | 32.88    | not significant |
| 10283 | MAGEH1       | 1.20 | 2.29E-05 | 7.23E-05 | 727.25   | not significant |
| 10284 | IKKB         | 1.20 | 1.10E-13 | 8.43E-13 | 3156.00  | not significant |

|       |              |      |          |          |          |                 |
|-------|--------------|------|----------|----------|----------|-----------------|
| 10285 | WRAP53       | 1.20 | 3.82E-07 | 1.52E-06 | 1202.80  | not significant |
| 10286 | FAM102B      | 1.20 | 4.91E-13 | 3.55E-12 | 3152.16  | not significant |
| 10287 | PSMB10       | 1.21 | 2.10E-08 | 9.71E-08 | 2600.59  | not significant |
| 10288 | ST8SIA4      | 1.21 | 1.04E-11 | 6.72E-11 | 2288.91  | not significant |
| 10289 | TBC1D1       | 1.21 | 5.23E-16 | 4.90E-15 | 5126.39  | not significant |
| 10290 | SAP25        | 1.21 | 4.35E-02 | 7.34E-02 | 380.89   | not significant |
| 10291 | GIMAP8       | 1.21 | 9.01E-11 | 5.31E-10 | 2751.36  | not significant |
| 10292 | UBOX5        | 1.21 | 4.55E-05 | 1.38E-04 | 628.85   | not significant |
| 10293 | SGSM2        | 1.21 | 3.71E-08 | 1.67E-07 | 2736.62  | not significant |
| 10294 | TTC39B       | 1.21 | 1.28E-03 | 3.02E-03 | 394.99   | not significant |
| 10295 | EXOSC6       | 1.21 | 3.75E-07 | 1.50E-06 | 1110.68  | not significant |
| 10296 | HACL1        | 1.21 | 1.63E-04 | 4.51E-04 | 517.23   | not significant |
| 10297 | GGCT         | 1.21 | 2.15E-08 | 9.95E-08 | 2717.79  | not significant |
| 10298 | ZNF512B      | 1.21 | 5.32E-09 | 2.62E-08 | 3394.26  | not significant |
| 10299 | FSD1L        | 1.21 | 5.99E-03 | 1.23E-02 | 232.51   | not significant |
| 10300 | RPL28        | 1.21 | 3.95E-13 | 2.89E-12 | 18043.88 | not significant |
| 10301 | PPOX         | 1.21 | 3.26E-04 | 8.55E-04 | 559.63   | not significant |
| 10302 | WSB1         | 1.21 | 2.12E-04 | 5.75E-04 | 4137.91  | not significant |
| 10303 | PROCA1       | 1.21 | 2.93E-02 | 5.16E-02 | 122.01   | not significant |
| 10304 | TRAF3IP2-AS1 | 1.21 | 1.05E-04 | 3.00E-04 | 559.20   | not significant |
| 10305 | SSCA1-AS1    | 1.21 | 5.67E-02 | 9.28E-02 | 21.39    | not significant |
| 10306 | TRAK1        | 1.21 | 2.63E-03 | 5.82E-03 | 285.08   | not significant |
| 10307 | NUP43        | 1.21 | 6.15E-13 | 4.42E-12 | 3192.96  | not significant |
| 10308 | TMEM97       | 1.21 | 9.94E-03 | 1.95E-02 | 181.34   | not significant |
| 10309 | SLC25A3      | 1.21 | 6.07E-17 | 6.18E-16 | 19192.97 | not significant |
| 10310 | TTC17        | 1.21 | 1.18E-12 | 8.32E-12 | 3014.59  | not significant |
| 10311 | SMAD3        | 1.21 | 2.83E-05 | 8.82E-05 | 700.20   | not significant |
| 10312 | ZNF211       | 1.21 | 1.35E-05 | 4.41E-05 | 682.42   | not significant |
| 10313 | C7orf43      | 1.21 | 3.63E-05 | 1.11E-04 | 972.10   | not significant |
| 10314 | CROCCP2      | 1.21 | 1.49E-04 | 4.15E-04 | 554.32   | not significant |
| 10315 | CCDC130      | 1.21 | 1.38E-05 | 4.49E-05 | 847.97   | not significant |
| 10316 | AHI1         | 1.21 | 1.66E-03 | 3.82E-03 | 320.57   | not significant |
| 10317 | TSSK6        | 1.21 | 5.13E-03 | 1.07E-02 | 236.65   | not significant |
| 10318 | ANP32B       | 1.21 | 3.86E-15 | 3.38E-14 | 18250.66 | not significant |
| 10319 | MUTYH        | 1.21 | 8.83E-07 | 3.36E-06 | 1149.96  | not significant |
| 10320 | CD1D         | 1.21 | 4.35E-04 | 1.11E-03 | 474.20   | not significant |
| 10321 | TRIM68       | 1.21 | 3.60E-05 | 1.11E-04 | 674.89   | not significant |
| 10322 | TMEM194A     | 1.21 | 7.15E-21 | 9.66E-20 | 9831.44  | not significant |
| 10323 | RAD9B        | 1.21 | 6.12E-02 | 9.92E-02 | 29.21    | not significant |
| 10324 | PRAF2        | 1.21 | 1.02E-03 | 2.44E-03 | 354.87   | not significant |
| 10325 | NACA         | 1.21 | 9.37E-05 | 2.70E-04 | 27906.47 | not significant |
| 10326 | TET2         | 1.21 | 1.13E-06 | 4.25E-06 | 1198.94  | not significant |
| 10327 | DHRS4L1      | 1.21 | 5.07E-02 | 8.41E-02 | 59.26    | not significant |
| 10328 | ZNF219       | 1.21 | 9.46E-06 | 3.15E-05 | 834.88   | not significant |
| 10329 | ZFP69B       | 1.21 | 3.50E-03 | 7.57E-03 | 249.36   | not significant |
| 10330 | IFT52        | 1.21 | 6.43E-08 | 2.81E-07 | 1395.48  | not significant |
| 10331 | OXR1         | 1.21 | 2.63E-10 | 1.49E-09 | 1929.68  | not significant |
| 10332 | GTPBP2       | 1.21 | 1.46E-08 | 6.85E-08 | 2041.72  | not significant |
| 10333 | CYP4F2       | 1.21 | 2.50E-02 | 4.48E-02 | 125.15   | not significant |
| 10334 | MRFAP1       | 1.21 | 2.35E-11 | 1.46E-10 | 4329.37  | not significant |
| 10335 | ZNF48        | 1.21 | 8.38E-07 | 3.20E-06 | 947.77   | not significant |
| 10336 | LNPEP        | 1.21 | 1.06E-10 | 6.20E-10 | 2228.63  | not significant |
| 10337 | ATF6B        | 1.21 | 2.70E-08 | 1.23E-07 | 1603.40  | not significant |
| 10338 | ACBD4        | 1.21 | 2.36E-03 | 5.26E-03 | 316.54   | not significant |
| 10339 | PLEKHG5      | 1.21 | 5.09E-02 | 8.44E-02 | 54.66    | not significant |
| 10340 | DNMBP        | 1.21 | 4.48E-05 | 1.36E-04 | 597.42   | not significant |
| 10341 | MED13L       | 1.21 | 1.93E-18 | 2.21E-17 | 8217.88  | not significant |
| 10342 | TSPYL5       | 1.21 | 1.91E-13 | 1.44E-12 | 2564.64  | not significant |
| 10343 | AKAP2        | 1.21 | 5.10E-02 | 8.45E-02 | 19.85    | not significant |
| 10344 | LYPD3        | 1.21 | 5.92E-02 | 9.63E-02 | 34.18    | not significant |
| 10345 | TAPBPL       | 1.21 | 2.14E-06 | 7.76E-06 | 894.36   | not significant |
| 10346 | ST3GAL5      | 1.21 | 8.31E-06 | 2.79E-05 | 760.15   | not significant |
| 10347 | SH3GLB2      | 1.21 | 7.94E-10 | 4.24E-09 | 2097.30  | not significant |
| 10348 | EXOG         | 1.21 | 1.52E-04 | 4.22E-04 | 640.14   | not significant |
| 10349 | B3GAT3       | 1.21 | 4.15E-08 | 1.86E-07 | 1334.11  | not significant |
| 10350 | FAM111A      | 1.21 | 1.37E-15 | 1.24E-14 | 5571.52  | not significant |
| 10351 | C8orf44      | 1.21 | 4.41E-02 | 7.43E-02 | 84.07    | not significant |
| 10352 | REL          | 1.21 | 1.52E-08 | 7.09E-08 | 1620.37  | not significant |
| 10353 | LOC100132356 | 1.21 | 5.57E-02 | 9.14E-02 | 46.11    | not significant |
| 10354 | SPON2        | 1.21 | 3.35E-02 | 5.82E-02 | 93.63    | not significant |
| 10355 | C17orf59     | 1.21 | 3.40E-04 | 8.89E-04 | 431.28   | not significant |
| 10356 | DIDO1        | 1.21 | 8.28E-12 | 5.39E-11 | 4992.30  | not significant |
| 10357 | C16orf59     | 1.21 | 1.85E-06 | 6.79E-06 | 970.16   | not significant |
| 10358 | PITPNC1      | 1.21 | 1.48E-13 | 1.13E-12 | 3148.72  | not significant |
| 10359 | PPP1R15A     | 1.21 | 1.43E-05 | 4.64E-05 | 690.25   | not significant |
| 10360 | GFOD2        | 1.21 | 1.11E-07 | 4.70E-07 | 1113.80  | not significant |
| 10361 | RAB5B        | 1.21 | 1.72E-19 | 2.12E-18 | 5266.23  | not significant |
| 10362 | DLG5         | 1.21 | 3.04E-08 | 1.39E-07 | 1403.01  | not significant |
| 10363 | RAB9B        | 1.21 | 3.90E-04 | 1.01E-03 | 416.54   | not significant |
| 10364 | PVRIG        | 1.21 | 2.31E-11 | 1.43E-10 | 2462.44  | not significant |
| 10365 | GNS          | 1.21 | 3.88E-16 | 3.66E-15 | 3800.94  | not significant |
| 10366 | ZER1         | 1.21 | 1.99E-07 | 8.19E-07 | 1067.43  | not significant |
| 10367 | NCAPH2       | 1.21 | 8.88E-18 | 9.64E-17 | 5125.11  | not significant |
| 10368 | KCNN4        | 1.21 | 1.75E-04 | 4.83E-04 | 480.44   | not significant |
| 10369 | GPX4         | 1.21 | 2.05E-14 | 1.67E-13 | 5366.47  | not significant |
| 10370 | CCNI         | 1.21 | 1.20E-20 | 1.59E-19 | 12122.13 | not significant |
| 10371 | MROH1        | 1.21 | 5.57E-03 | 1.15E-02 | 235.95   | not significant |
| 10372 | CHMP3        | 1.22 | 5.61E-02 | 9.19E-02 | 36.34    | not significant |

|       |              |      |          |          |          |                 |
|-------|--------------|------|----------|----------|----------|-----------------|
| 10373 | RPL10A       | 1.22 | 2.68E-20 | 3.49E-19 | 16758.75 | not significant |
| 10374 | ZNF740       | 1.22 | 4.95E-12 | 3.29E-11 | 2836.49  | not significant |
| 10375 | ZNF157       | 1.22 | 5.67E-02 | 9.28E-02 | 31.10    | not significant |
| 10376 | GTSE1-AS1    | 1.22 | 4.65E-02 | 7.81E-02 | 18.08    | not significant |
| 10377 | STX3         | 1.22 | 5.48E-02 | 9.02E-02 | 39.01    | not significant |
| 10378 | TSHZ1        | 1.22 | 7.33E-09 | 3.56E-08 | 1747.90  | not significant |
| 10379 | SMPD1        | 1.22 | 3.61E-02 | 6.22E-02 | 75.65    | not significant |
| 10380 | LOC100507217 | 1.22 | 3.44E-06 | 1.22E-05 | 901.10   | not significant |
| 10381 | FBXL20       | 1.22 | 2.45E-05 | 7.69E-05 | 632.81   | not significant |
| 10382 | LOC100287042 | 1.22 | 1.64E-02 | 3.07E-02 | 145.16   | not significant |
| 10383 | GDI2         | 1.22 | 3.81E-22 | 5.57E-21 | 14683.77 | not significant |
| 10384 | PCMTD1       | 1.22 | 1.25E-08 | 5.91E-08 | 1563.82  | not significant |
| 10385 | FGR          | 1.22 | 3.11E-04 | 8.17E-04 | 425.75   | not significant |
| 10386 | SF3A2        | 1.22 | 2.65E-16 | 2.54E-15 | 7540.78  | not significant |
| 10387 | OVGP1        | 1.22 | 4.73E-02 | 7.92E-02 | 59.62    | not significant |
| 10388 | RPS13        | 1.22 | 1.27E-16 | 1.26E-15 | 14601.28 | not significant |
| 10389 | ZFAND2B      | 1.22 | 1.78E-06 | 6.55E-06 | 896.52   | not significant |
| 10390 | CLUAP1       | 1.22 | 6.98E-06 | 2.37E-05 | 732.46   | not significant |
| 10391 | LTA4H        | 1.22 | 4.58E-14 | 3.64E-13 | 4070.53  | not significant |
| 10392 | LRRC41       | 1.22 | 5.30E-12 | 3.51E-11 | 2571.65  | not significant |
| 10393 | HR           | 1.22 | 5.55E-02 | 9.10E-02 | 32.98    | not significant |
| 10394 | MNT          | 1.22 | 5.85E-06 | 2.00E-05 | 825.48   | not significant |
| 10395 | CCDC77       | 1.22 | 2.67E-06 | 9.57E-06 | 863.65   | not significant |
| 10396 | PLD6         | 1.22 | 4.81E-02 | 8.03E-02 | 53.27    | not significant |
| 10397 | LOC101928710 | 1.22 | 5.63E-03 | 1.17E-02 | 261.59   | not significant |
| 10398 | LANCL2       | 1.22 | 2.95E-05 | 9.19E-05 | 693.63   | not significant |
| 10399 | ZNF547       | 1.22 | 3.46E-02 | 6.00E-02 | 77.27    | not significant |
| 10400 | KHDC1        | 1.22 | 1.54E-02 | 2.90E-02 | 136.11   | not significant |
| 10401 | STXBPSL      | 1.22 | 5.51E-02 | 9.05E-02 | 39.48    | not significant |
| 10402 | LOC100507530 | 1.22 | 3.99E-02 | 6.79E-02 | 66.63    | not significant |
| 10403 | NAPB         | 1.22 | 2.18E-05 | 6.91E-05 | 642.97   | not significant |
| 10404 | F2R          | 1.22 | 6.06E-10 | 3.29E-09 | 1581.92  | not significant |
| 10405 | RINL         | 1.22 | 4.85E-05 | 1.46E-04 | 580.40   | not significant |
| 10406 | IL7R         | 1.22 | 8.16E-04 | 1.98E-03 | 364.32   | not significant |
| 10407 | UXT          | 1.22 | 4.84E-11 | 2.93E-10 | 1811.92  | not significant |
| 10408 | DNA2         | 1.22 | 1.29E-11 | 8.27E-11 | 3215.21  | not significant |
| 10409 | LINC00339    | 1.22 | 2.02E-03 | 4.55E-03 | 273.08   | not significant |
| 10410 | PLEKHM1P     | 1.22 | 1.01E-03 | 2.40E-03 | 497.59   | not significant |
| 10411 | DCAF16       | 1.22 | 3.82E-12 | 2.56E-11 | 2999.76  | not significant |
| 10412 | ANKRD18DP    | 1.22 | 4.05E-02 | 6.88E-02 | 71.71    | not significant |
| 10413 | P2RX4        | 1.22 | 5.65E-07 | 2.20E-06 | 860.65   | not significant |
| 10414 | KEAP1        | 1.22 | 1.19E-10 | 6.93E-10 | 2728.26  | not significant |
| 10415 | CYP2D7P      | 1.22 | 5.47E-02 | 9.01E-02 | 26.39    | not significant |
| 10416 | FAM135A      | 1.22 | 2.15E-04 | 5.83E-04 | 435.92   | not significant |
| 10417 | BTN3A1       | 1.22 | 1.73E-09 | 8.94E-09 | 1617.32  | not significant |
| 10418 | RAET1E-AS1   | 1.22 | 5.23E-02 | 8.64E-02 | 22.95    | not significant |
| 10419 | RECQL5       | 1.22 | 1.57E-07 | 6.54E-07 | 1328.71  | not significant |
| 10420 | FGD5-AS1     | 1.22 | 7.38E-23 | 1.13E-21 | 6366.93  | not significant |
| 10421 | CDK5R1       | 1.22 | 1.99E-03 | 4.50E-03 | 274.91   | not significant |
| 10422 | RPS11        | 1.22 | 2.77E-21 | 3.82E-20 | 30771.93 | not significant |
| 10423 | ABCA4        | 1.22 | 5.15E-02 | 8.53E-02 | 41.05    | not significant |
| 10424 | TSC22D1-AS1  | 1.22 | 3.19E-02 | 5.58E-02 | 11.98    | not significant |
| 10425 | GCNT4        | 1.22 | 3.24E-02 | 5.65E-02 | 80.42    | not significant |
| 10426 | PTDSS2       | 1.22 | 9.06E-09 | 4.38E-08 | 1251.62  | not significant |
| 10427 | AFF2         | 1.22 | 1.81E-04 | 4.97E-04 | 454.86   | not significant |
| 10428 | NPTN-IT1     | 1.22 | 5.00E-02 | 8.32E-02 | 52.81    | not significant |
| 10429 | ALG10B       | 1.22 | 8.89E-08 | 3.82E-07 | 1406.50  | not significant |
| 10430 | JRKL         | 1.22 | 3.75E-07 | 1.50E-06 | 885.43   | not significant |
| 10431 | UBE2W        | 1.22 | 9.63E-08 | 4.12E-07 | 1136.97  | not significant |
| 10432 | USP20        | 1.22 | 4.56E-21 | 6.24E-20 | 6048.61  | not significant |
| 10433 | RPS24        | 1.22 | 2.59E-12 | 1.76E-11 | 18378.46 | not significant |
| 10434 | LOC100130950 | 1.22 | 5.35E-02 | 8.83E-02 | 25.54    | not significant |
| 10435 | RAP2A        | 1.22 | 1.57E-11 | 9.94E-11 | 2056.55  | not significant |
| 10436 | NFIC         | 1.22 | 2.18E-09 | 1.12E-08 | 1450.24  | not significant |
| 10437 | SH3GLB1      | 1.22 | 2.03E-16 | 1.97E-15 | 3681.89  | not significant |
| 10438 | PSMA2        | 1.22 | 1.91E-11 | 1.20E-10 | 6713.77  | not significant |
| 10439 | MGEA5        | 1.22 | 1.13E-15 | 1.03E-14 | 5071.34  | not significant |
| 10440 | ZNF222       | 1.22 | 1.17E-02 | 2.26E-02 | 141.16   | not significant |
| 10441 | MRC2         | 1.22 | 9.33E-09 | 4.50E-08 | 2033.27  | not significant |
| 10442 | RALGPS2      | 1.22 | 1.70E-10 | 9.79E-10 | 1682.43  | not significant |
| 10443 | CASD1        | 1.22 | 8.14E-14 | 6.32E-13 | 2500.55  | not significant |
| 10444 | MT2A         | 1.22 | 1.92E-04 | 5.25E-04 | 12755.09 | not significant |
| 10445 | EEF1G        | 1.22 | 1.45E-18 | 1.68E-17 | 18356.50 | not significant |
| 10446 | SCAMP1-AS1   | 1.22 | 7.35E-04 | 1.80E-03 | 368.21   | not significant |
| 10447 | CBX2         | 1.22 | 2.17E-03 | 4.87E-03 | 288.07   | not significant |
| 10448 | ZNF316       | 1.22 | 2.28E-13 | 1.70E-12 | 2366.75  | not significant |
| 10449 | ZNF582       | 1.22 | 6.43E-03 | 1.32E-02 | 178.98   | not significant |
| 10450 | SMIM14       | 1.22 | 8.36E-03 | 1.67E-02 | 177.79   | not significant |
| 10451 | PLA2G12A     | 1.22 | 5.79E-05 | 1.73E-04 | 505.46   | not significant |
| 10452 | ZFYVE16      | 1.22 | 5.59E-06 | 1.92E-05 | 772.71   | not significant |
| 10453 | NR5A1        | 1.22 | 2.23E-02 | 4.06E-02 | 101.31   | not significant |
| 10454 | ATP6V0A2     | 1.22 | 3.26E-14 | 2.63E-13 | 3040.85  | not significant |
| 10455 | ZNF823       | 1.22 | 2.46E-03 | 5.48E-03 | 242.41   | not significant |
| 10456 | CROT         | 1.22 | 4.79E-05 | 1.44E-04 | 543.99   | not significant |
| 10457 | RPLP2        | 1.22 | 5.11E-05 | 1.54E-04 | 21664.39 | not significant |
| 10458 | RAB30-AS1    | 1.22 | 1.58E-02 | 2.96E-02 | 123.83   | not significant |
| 10459 | KCNA3        | 1.22 | 1.56E-16 | 1.53E-15 | 4573.46  | not significant |
| 10460 | CAPN10       | 1.22 | 1.74E-07 | 7.21E-07 | 955.50   | not significant |

|       |            |      |          |          |          |                 |
|-------|------------|------|----------|----------|----------|-----------------|
| 10461 | ARHGEF39   | 1.22 | 4.30E-04 | 1.10E-03 | 375.95   | not significant |
| 10462 | OSBP2      | 1.22 | 1.60E-02 | 2.99E-02 | 129.97   | not significant |
| 10463 | PTPRC      | 1.22 | 3.13E-26 | 5.98E-25 | 12514.57 | not significant |
| 10464 | PRR29      | 1.22 | 4.83E-02 | 8.06E-02 | 46.88    | not significant |
| 10465 | ADPRM      | 1.23 | 6.08E-03 | 1.25E-02 | 184.97   | not significant |
| 10466 | EFCAB2     | 1.23 | 7.26E-05 | 2.13E-04 | 469.38   | not significant |
| 10467 | CCDC34     | 1.23 | 5.26E-09 | 2.59E-08 | 1525.13  | not significant |
| 10468 | CDC37L1    | 1.23 | 4.81E-03 | 1.01E-02 | 198.34   | not significant |
| 10469 | HMG3-AS1   | 1.23 | 5.04E-02 | 8.37E-02 | 36.63    | not significant |
| 10470 | ANKMY1     | 1.23 | 3.94E-05 | 1.20E-04 | 512.21   | not significant |
| 10471 | KANSL1     | 1.23 | 1.48E-07 | 6.19E-07 | 1039.26  | not significant |
| 10472 | RECQL4     | 1.23 | 2.04E-10 | 1.17E-09 | 3501.87  | not significant |
| 10473 | MYEF2      | 1.23 | 1.13E-07 | 4.81E-07 | 1896.46  | not significant |
| 10474 | GUSBP11    | 1.23 | 1.53E-02 | 2.88E-02 | 1019.06  | not significant |
| 10475 | ZRANB3     | 1.23 | 1.35E-04 | 3.80E-04 | 472.60   | not significant |
| 10476 | FLCN       | 1.23 | 9.23E-09 | 4.46E-08 | 1225.34  | not significant |
| 10477 | STK35      | 1.23 | 4.85E-12 | 3.23E-11 | 2061.56  | not significant |
| 10478 | RRNAD1     | 1.23 | 7.45E-06 | 2.52E-05 | 621.76   | not significant |
| 10479 | RPL7A      | 1.23 | 1.35E-19 | 1.68E-18 | 19205.94 | not significant |
| 10480 | BAG1       | 1.23 | 7.42E-10 | 3.98E-09 | 1612.50  | not significant |
| 10481 | S100PBP    | 1.23 | 1.08E-12 | 7.61E-12 | 2616.66  | not significant |
| 10482 | FAM13A-AS1 | 1.23 | 5.05E-02 | 8.38E-02 | 29.56    | not significant |
| 10483 | ZNF493     | 1.23 | 1.32E-09 | 6.87E-09 | 1377.73  | not significant |
| 10484 | FLI1       | 1.23 | 4.15E-17 | 4.27E-16 | 3748.31  | not significant |
| 10485 | TIMELESS   | 1.23 | 1.85E-28 | 4.06E-27 | 11718.68 | not significant |
| 10486 | FAM110A    | 1.23 | 6.83E-08 | 2.97E-07 | 978.94   | not significant |
| 10487 | UHRF1BP1L  | 1.23 | 1.16E-09 | 6.09E-09 | 1334.41  | not significant |
| 10488 | ERAP2      | 1.23 | 6.10E-29 | 1.38E-27 | 13969.10 | not significant |
| 10489 | DCP2       | 1.23 | 1.41E-14 | 1.17E-13 | 7532.74  | not significant |
| 10490 | DDX17      | 1.23 | 4.54E-13 | 3.29E-12 | 21461.59 | not significant |
| 10491 | NETO2      | 1.23 | 1.37E-09 | 7.13E-09 | 1571.84  | not significant |
| 10492 | RAB33B     | 1.23 | 6.82E-05 | 2.01E-04 | 504.37   | not significant |
| 10493 | ABCC10     | 1.23 | 5.65E-06 | 1.94E-05 | 813.67   | not significant |
| 10494 | ZFP62      | 1.23 | 7.93E-07 | 3.03E-06 | 1268.15  | not significant |
| 10495 | TRIM22     | 1.23 | 2.53E-11 | 1.57E-10 | 2479.77  | not significant |
| 10496 | RNF150     | 1.23 | 4.07E-04 | 1.05E-03 | 345.35   | not significant |
| 10497 | POLR1D     | 1.23 | 9.53E-20 | 1.20E-18 | 5402.70  | not significant |
| 10498 | ACVR2B-AS1 | 1.23 | 4.81E-02 | 8.03E-02 | 29.64    | not significant |
| 10499 | ZNF549     | 1.23 | 1.22E-05 | 4.02E-05 | 603.82   | not significant |
| 10500 | IQCB1      | 1.23 | 2.73E-10 | 1.54E-09 | 1476.02  | not significant |
| 10501 | TMPPE      | 1.23 | 1.32E-02 | 2.53E-02 | 137.67   | not significant |
| 10502 | CHMP5      | 1.23 | 5.77E-10 | 3.14E-09 | 1358.81  | not significant |
| 10503 | NGRN       | 1.23 | 1.05E-12 | 7.43E-12 | 2494.34  | not significant |
| 10504 | TIRAP      | 1.23 | 4.50E-02 | 7.56E-02 | 19.05    | not significant |
| 10505 | ZNF575     | 1.23 | 6.33E-03 | 1.30E-02 | 168.42   | not significant |
| 10506 | ZNF782     | 1.23 | 5.41E-03 | 1.13E-02 | 192.79   | not significant |
| 10507 | COX10-AS1  | 1.23 | 4.88E-04 | 1.24E-03 | 379.63   | not significant |
| 10508 | LRRCS7     | 1.23 | 1.96E-05 | 6.24E-05 | 542.50   | not significant |
| 10509 | JAGN1      | 1.23 | 2.42E-08 | 1.11E-07 | 1375.52  | not significant |
| 10510 | KIF24      | 1.23 | 3.33E-08 | 1.51E-07 | 1105.75  | not significant |
| 10511 | SLC12A4    | 1.23 | 2.00E-07 | 8.24E-07 | 1018.98  | not significant |
| 10512 | FAM184A    | 1.23 | 1.07E-04 | 3.06E-04 | 441.93   | not significant |
| 10513 | FMNL1      | 1.23 | 1.65E-22 | 2.47E-21 | 10285.75 | not significant |
| 10514 | SFH1       | 1.23 | 4.23E-03 | 8.99E-03 | 2337.73  | not significant |
| 10515 | CALCOCO2   | 1.23 | 1.50E-20 | 1.98E-19 | 4477.46  | not significant |
| 10516 | DPP7       | 1.23 | 9.46E-12 | 6.13E-11 | 2527.24  | not significant |
| 10517 | GPR56      | 1.23 | 8.42E-16 | 7.78E-15 | 3214.05  | not significant |
| 10518 | TMEM14C    | 1.23 | 3.34E-12 | 2.24E-11 | 2096.15  | not significant |
| 10519 | RPS18P9    | 1.23 | 3.99E-02 | 6.79E-02 | 53.60    | not significant |
| 10520 | INPP5B     | 1.23 | 2.90E-10 | 1.64E-09 | 1388.76  | not significant |
| 10521 | CCT6P1     | 1.23 | 1.95E-02 | 3.58E-02 | 105.71   | not significant |
| 10522 | NARF       | 1.23 | 3.94E-17 | 4.07E-16 | 3970.37  | not significant |
| 10523 | CTNNBIP1   | 1.23 | 1.88E-07 | 7.79E-07 | 1145.18  | not significant |
| 10524 | PACS2      | 1.23 | 1.24E-05 | 4.08E-05 | 587.62   | not significant |
| 10525 | ZFH3       | 1.23 | 4.01E-03 | 8.59E-03 | 230.19   | not significant |
| 10526 | HERC3      | 1.23 | 9.72E-08 | 4.16E-07 | 1049.91  | not significant |
| 10527 | WDR91      | 1.23 | 3.24E-05 | 1.00E-04 | 562.72   | not significant |
| 10528 | DDX54      | 1.23 | 1.33E-19 | 1.65E-18 | 6858.60  | not significant |
| 10529 | DNMT3A     | 1.23 | 4.93E-18 | 5.49E-17 | 3881.93  | not significant |
| 10530 | CEP192     | 1.23 | 5.17E-13 | 3.73E-12 | 4136.89  | not significant |
| 10531 | AGBL5      | 1.23 | 1.13E-13 | 8.67E-13 | 2241.78  | not significant |
| 10532 | PARD6B     | 1.23 | 2.10E-02 | 3.83E-02 | 90.18    | not significant |
| 10533 | LRRCS39    | 1.23 | 4.75E-02 | 7.95E-02 | 30.41    | not significant |
| 10534 | NBR1       | 1.23 | 1.05E-14 | 8.83E-14 | 3277.97  | not significant |
| 10535 | GABPB1-AS1 | 1.23 | 1.20E-03 | 2.82E-03 | 270.14   | not significant |
| 10536 | RASGRP2    | 1.23 | 1.20E-10 | 6.99E-10 | 1666.37  | not significant |
| 10537 | YIPF4      | 1.23 | 7.89E-08 | 3.41E-07 | 1119.12  | not significant |
| 10538 | DBH        | 1.23 | 2.44E-02 | 4.38E-02 | 10.54    | not significant |
| 10539 | SEC14L1P1  | 1.23 | 4.17E-02 | 7.06E-02 | 47.13    | not significant |
| 10540 | SYNE1      | 1.24 | 3.50E-09 | 1.76E-08 | 1687.69  | not significant |
| 10541 | PARP2      | 1.24 | 1.21E-11 | 7.78E-11 | 1723.08  | not significant |
| 10542 | ITFG2      | 1.24 | 2.29E-07 | 9.38E-07 | 902.83   | not significant |
| 10543 | TBC1D32    | 1.24 | 1.75E-03 | 4.00E-03 | 262.05   | not significant |
| 10544 | C11orf95   | 1.24 | 2.68E-11 | 1.66E-10 | 1607.64  | not significant |
| 10545 | GABRB3     | 1.24 | 3.94E-09 | 1.97E-08 | 1207.67  | not significant |
| 10546 | ZKSCAN8    | 1.24 | 1.48E-12 | 1.03E-11 | 2530.35  | not significant |
| 10547 | MIB2       | 1.24 | 3.07E-08 | 1.40E-07 | 1252.98  | not significant |
| 10548 | ADAMTS1    | 1.24 | 1.18E-17 | 1.27E-16 | 3836.14  | not significant |



|       |             |      |          |          |          |                 |
|-------|-------------|------|----------|----------|----------|-----------------|
| 10549 | THUMPD3-AS1 | 1.24 | 5.18E-04 | 1.31E-03 | 399.80   | not significant |
| 10550 | RPL9        | 1.24 | 6.83E-15 | 5.87E-14 | 19651.94 | not significant |
| 10551 | KIAA0319L   | 1.24 | 4.23E-10 | 2.34E-09 | 1418.35  | not significant |
| 10552 | PURB        | 1.24 | 1.13E-05 | 3.74E-05 | 4929.76  | not significant |
| 10553 | ACVR1       | 1.24 | 1.62E-03 | 3.73E-03 | 239.03   | not significant |
| 10554 | SLC24A1     | 1.24 | 5.29E-04 | 1.34E-03 | 307.83   | not significant |
| 10555 | TTL         | 1.24 | 6.58E-14 | 5.16E-13 | 2031.49  | not significant |
| 10556 | RAVER2      | 1.24 | 2.47E-02 | 4.43E-02 | 10.00    | not significant |
| 10557 | EPAS1       | 1.24 | 1.42E-15 | 1.29E-14 | 3305.53  | not significant |
| 10558 | SLC4A7      | 1.24 | 5.36E-13 | 3.86E-12 | 4990.44  | not significant |
| 10559 | SNX21       | 1.24 | 2.69E-02 | 4.78E-02 | 11.05    | not significant |
| 10560 | MAP3K12     | 1.24 | 4.62E-06 | 1.60E-05 | 650.12   | not significant |
| 10561 | SRPK2       | 1.24 | 3.61E-25 | 6.53E-24 | 9036.62  | not significant |
| 10562 | CEP44       | 1.24 | 1.98E-08 | 9.19E-08 | 1126.94  | not significant |
| 10563 | MAPK8IP3    | 1.24 | 4.57E-03 | 9.67E-03 | 2266.40  | not significant |
| 10564 | DHPS        | 1.24 | 1.70E-16 | 1.66E-15 | 2889.29  | not significant |
| 10565 | TRG-AS1     | 1.24 | 3.62E-18 | 4.08E-17 | 4382.57  | not significant |
| 10566 | HACE1       | 1.24 | 3.57E-16 | 3.38E-15 | 2694.11  | not significant |
| 10567 | C22orf29    | 1.24 | 6.41E-14 | 5.03E-13 | 2783.80  | not significant |
| 10568 | GJC1        | 1.24 | 5.02E-16 | 4.71E-15 | 2642.03  | not significant |
| 10569 | EXOSC1      | 1.24 | 2.62E-07 | 1.07E-06 | 873.87   | not significant |
| 10570 | DVL2        | 1.24 | 1.17E-16 | 1.16E-15 | 3708.45  | not significant |
| 10571 | SAMD12      | 1.24 | 3.18E-02 | 5.56E-02 | 63.61    | not significant |
| 10572 | ZFP30       | 1.24 | 5.80E-07 | 2.25E-06 | 730.28   | not significant |
| 10573 | SPIDR       | 1.24 | 4.95E-13 | 3.58E-12 | 1981.32  | not significant |
| 10574 | EPOR        | 1.24 | 3.68E-03 | 7.93E-03 | 181.07   | not significant |
| 10575 | ZNF397      | 1.24 | 1.52E-06 | 5.63E-06 | 790.17   | not significant |
| 10576 | TRPV1       | 1.24 | 1.04E-03 | 2.48E-03 | 280.38   | not significant |
| 10577 | ZNF517      | 1.24 | 1.81E-02 | 3.36E-02 | 96.89    | not significant |
| 10578 | KIF21A      | 1.24 | 5.18E-04 | 1.31E-03 | 336.85   | not significant |
| 10579 | ASPSCR1     | 1.24 | 2.88E-07 | 1.17E-06 | 942.59   | not significant |
| 10580 | CERS2       | 1.24 | 6.31E-23 | 9.72E-22 | 7979.04  | not significant |
| 10581 | ARFGAP3     | 1.24 | 9.94E-16 | 9.12E-15 | 4700.86  | not significant |
| 10582 | KLHL2       | 1.24 | 4.42E-04 | 1.13E-03 | 316.75   | not significant |
| 10583 | C1RL        | 1.24 | 1.69E-03 | 3.88E-03 | 231.83   | not significant |
| 10584 | FAU         | 1.24 | 9.69E-17 | 9.67E-16 | 8552.32  | not significant |
| 10585 | CNNM3       | 1.24 | 1.26E-12 | 8.88E-12 | 2364.57  | not significant |
| 10586 | MFSD11      | 1.24 | 4.57E-10 | 2.52E-09 | 1329.73  | not significant |
| 10587 | FECH        | 1.24 | 6.30E-10 | 3.41E-09 | 1357.10  | not significant |
| 10588 | CD3E        | 1.24 | 6.82E-19 | 8.04E-18 | 26655.52 | not significant |
| 10589 | DICER1-AS1  | 1.24 | 2.98E-02 | 5.25E-02 | 63.17    | not significant |
| 10590 | C19orf44    | 1.24 | 1.66E-03 | 3.81E-03 | 238.31   | not significant |
| 10591 | SUN1        | 1.24 | 1.92E-16 | 1.87E-15 | 3057.51  | not significant |
| 10592 | GYG1        | 1.24 | 7.13E-04 | 1.75E-03 | 274.30   | not significant |
| 10593 | GTPBP1      | 1.24 | 6.66E-15 | 5.73E-14 | 2508.22  | not significant |
| 10594 | MURC        | 1.24 | 3.19E-02 | 5.58E-02 | 58.62    | not significant |
| 10595 | ZBED5       | 1.24 | 5.49E-04 | 1.38E-03 | 1713.59  | not significant |
| 10596 | ZNF623      | 1.24 | 1.78E-08 | 8.29E-08 | 1011.83  | not significant |
| 10597 | P4HTM       | 1.24 | 2.30E-02 | 4.16E-02 | 83.22    | not significant |
| 10598 | JUND        | 1.24 | 2.20E-14 | 1.80E-13 | 6304.98  | not significant |
| 10599 | TAF1D       | 1.24 | 1.37E-12 | 9.58E-12 | 1741.65  | not significant |
| 10600 | CRYZL1      | 1.24 | 1.05E-07 | 4.46E-07 | 861.52   | not significant |
| 10601 | ZNF594      | 1.24 | 4.15E-03 | 8.84E-03 | 186.72   | not significant |
| 10602 | SRY         | 1.24 | 2.87E-02 | 5.08E-02 | 67.53    | not significant |
| 10603 | RNF44       | 1.24 | 1.69E-17 | 1.80E-16 | 5425.18  | not significant |
| 10604 | TRIOBP      | 1.24 | 1.24E-12 | 8.73E-12 | 1953.64  | not significant |
| 10605 | ZNF37BP     | 1.24 | 1.25E-02 | 2.41E-02 | 1977.95  | not significant |
| 10606 | RANBP6      | 1.24 | 3.05E-12 | 2.06E-11 | 2341.79  | not significant |
| 10607 | OGN         | 1.24 | 6.67E-06 | 2.27E-05 | 535.09   | not significant |
| 10608 | ADAM21      | 1.24 | 4.04E-02 | 6.87E-02 | 19.30    | not significant |
| 10609 | CAPRIN2     | 1.24 | 1.04E-03 | 2.49E-03 | 378.39   | not significant |
| 10610 | SLC38A2     | 1.24 | 2.42E-25 | 4.40E-24 | 20634.42 | not significant |
| 10611 | PPM1K       | 1.24 | 1.66E-12 | 1.15E-11 | 1938.51  | not significant |
| 10612 | ZFP90       | 1.24 | 6.83E-10 | 3.69E-09 | 1390.32  | not significant |
| 10613 | HHIP-AS1    | 1.24 | 1.06E-13 | 8.17E-13 | 2188.38  | not significant |
| 10614 | RALGPS1     | 1.24 | 1.07E-07 | 4.57E-07 | 1218.07  | not significant |
| 10615 | ELOVL5      | 1.24 | 3.32E-32 | 9.16E-31 | 22531.06 | not significant |
| 10616 | SGCB        | 1.24 | 5.58E-11 | 3.35E-10 | 1367.27  | not significant |
| 10617 | DLGAP4-AS1  | 1.24 | 4.28E-02 | 7.24E-02 | 24.67    | not significant |
| 10618 | IDH2        | 1.24 | 7.30E-21 | 9.86E-20 | 15307.12 | not significant |
| 10619 | RNF115      | 1.24 | 6.11E-05 | 1.82E-04 | 416.40   | not significant |
| 10620 | CNOT6       | 1.24 | 1.80E-26 | 3.49E-25 | 10992.22 | not significant |
| 10621 | ZNF586      | 1.24 | 5.74E-07 | 2.23E-06 | 687.08   | not significant |
| 10622 | RPLP1       | 1.24 | 3.99E-14 | 3.19E-13 | 26590.05 | not significant |
| 10623 | CDK18       | 1.25 | 1.38E-06 | 5.15E-06 | 651.95   | not significant |
| 10624 | QPCTL       | 1.25 | 5.45E-04 | 1.37E-03 | 296.77   | not significant |
| 10625 | RFXAP       | 1.25 | 1.50E-07 | 6.26E-07 | 851.72   | not significant |
| 10626 | CDCA7L      | 1.25 | 5.65E-27 | 1.14E-25 | 9354.78  | not significant |
| 10627 | TCF19       | 1.25 | 1.31E-08 | 6.19E-08 | 1006.65  | not significant |
| 10628 | KIAA0195    | 1.25 | 9.53E-22 | 1.36E-20 | 5242.61  | not significant |
| 10629 | PDE4D       | 1.25 | 3.61E-07 | 1.44E-06 | 781.11   | not significant |
| 10630 | TIAM1       | 1.25 | 6.41E-07 | 2.48E-06 | 725.55   | not significant |
| 10631 | SLFN13      | 1.25 | 4.29E-09 | 2.13E-08 | 1290.99  | not significant |
| 10632 | UIMC1       | 1.25 | 1.47E-10 | 8.47E-10 | 1531.17  | not significant |
| 10633 | SERINC1     | 1.25 | 6.21E-16 | 5.79E-15 | 3191.72  | not significant |
| 10634 | PCGF6       | 1.25 | 7.58E-06 | 2.56E-05 | 547.59   | not significant |
| 10635 | RBL2        | 1.25 | 2.18E-27 | 4.50E-26 | 8091.08  | not significant |
| 10636 | TMTC3       | 1.25 | 2.39E-05 | 7.52E-05 | 495.17   | not significant |

|       |            |      |          |          |          |                 |
|-------|------------|------|----------|----------|----------|-----------------|
| 10637 | ATAT1      | 1.25 | 2.56E-04 | 6.86E-04 | 322.28   | not significant |
| 10638 | SH3GL1P1   | 1.25 | 3.88E-02 | 6.62E-02 | 20.54    | not significant |
| 10639 | METTL3     | 1.25 | 7.53E-08 | 3.26E-07 | 1579.28  | not significant |
| 10640 | ERCC6      | 1.25 | 1.03E-04 | 2.95E-04 | 413.58   | not significant |
| 10641 | VOPP1      | 1.25 | 1.26E-05 | 4.14E-05 | 712.68   | not significant |
| 10642 | HSDL1      | 1.25 | 2.05E-19 | 2.52E-18 | 3181.05  | not significant |
| 10643 | TMEM170A   | 1.25 | 5.19E-05 | 1.56E-04 | 453.09   | not significant |
| 10644 | ZFYVE27    | 1.25 | 5.74E-11 | 3.45E-10 | 1359.62  | not significant |
| 10645 | SLC37A3    | 1.25 | 2.33E-12 | 1.59E-11 | 1595.28  | not significant |
| 10646 | FOXJ2      | 1.25 | 9.92E-12 | 6.42E-11 | 1514.17  | not significant |
| 10647 | MARCKSL1   | 1.25 | 5.16E-18 | 5.71E-17 | 13861.13 | not significant |
| 10648 | SFT2D3     | 1.25 | 2.40E-05 | 7.55E-05 | 577.05   | not significant |
| 10649 | WIP12      | 1.25 | 6.59E-19 | 7.79E-18 | 3564.15  | not significant |
| 10650 | RNASEH2C   | 1.25 | 1.03E-09 | 5.43E-09 | 1526.26  | not significant |
| 10651 | TPT1       | 1.25 | 1.37E-15 | 1.24E-14 | 96852.18 | not significant |
| 10652 | EMB        | 1.25 | 5.53E-25 | 9.89E-24 | 5101.57  | not significant |
| 10653 | ZMYM5      | 1.25 | 7.13E-08 | 3.09E-07 | 869.51   | not significant |
| 10654 | MMS19      | 1.25 | 1.11E-17 | 1.21E-16 | 2883.22  | not significant |
| 10655 | DSCAML1    | 1.25 | 1.62E-02 | 3.03E-02 | 97.72    | not significant |
| 10656 | PSMC3IP    | 1.25 | 1.93E-09 | 9.90E-09 | 1061.42  | not significant |
| 10657 | DPF2       | 1.25 | 7.04E-18 | 7.72E-17 | 3156.16  | not significant |
| 10658 | WDSUB1     | 1.25 | 1.77E-04 | 4.88E-04 | 346.15   | not significant |
| 10659 | DERL1      | 1.25 | 4.79E-19 | 5.72E-18 | 4111.45  | not significant |
| 10660 | RPS8       | 1.25 | 3.16E-15 | 2.78E-14 | 40609.17 | not significant |
| 10661 | ITGAV      | 1.25 | 5.44E-03 | 1.13E-02 | 154.20   | not significant |
| 10662 | OSER1      | 1.25 | 1.62E-08 | 7.56E-08 | 961.28   | not significant |
| 10663 | ZNF414     | 1.25 | 1.24E-06 | 4.66E-06 | 619.70   | not significant |
| 10664 | ARL4C      | 1.25 | 4.62E-29 | 1.06E-27 | 12844.01 | not significant |
| 10665 | ZAK        | 1.25 | 6.83E-17 | 6.91E-16 | 3319.93  | not significant |
| 10666 | CRYL1      | 1.25 | 3.14E-03 | 6.84E-03 | 182.17   | not significant |
| 10667 | RPL30      | 1.25 | 4.92E-19 | 5.86E-18 | 25746.55 | not significant |
| 10668 | SUZ12P1    | 1.25 | 6.63E-05 | 1.96E-04 | 495.54   | not significant |
| 10669 | COX7A2L    | 1.25 | 6.95E-20 | 8.82E-19 | 5222.14  | not significant |
| 10670 | STAG3L1    | 1.25 | 2.91E-02 | 5.14E-02 | 61.97    | not significant |
| 10671 | SLC35F5    | 1.25 | 3.07E-06 | 1.09E-05 | 664.97   | not significant |
| 10672 | GOLGB1     | 1.25 | 2.71E-12 | 1.84E-11 | 2377.24  | not significant |
| 10673 | COPG2      | 1.25 | 1.46E-06 | 5.42E-06 | 588.09   | not significant |
| 10674 | LRRC37A4P  | 1.25 | 4.64E-11 | 2.82E-10 | 2787.88  | not significant |
| 10675 | PMS2P5     | 1.25 | 3.43E-03 | 7.43E-03 | 167.07   | not significant |
| 10676 | ENO3       | 1.25 | 3.67E-04 | 9.54E-04 | 336.33   | not significant |
| 10677 | GATAD1     | 1.25 | 2.46E-08 | 1.13E-07 | 837.04   | not significant |
| 10678 | ENO2       | 1.25 | 3.80E-08 | 1.71E-07 | 840.16   | not significant |
| 10679 | NEURL4     | 1.25 | 1.08E-09 | 5.68E-09 | 1714.55  | not significant |
| 10680 | CDCA5      | 1.25 | 1.39E-26 | 2.73E-25 | 9418.29  | not significant |
| 10681 | RGPD1      | 1.25 | 4.85E-03 | 1.02E-02 | 189.12   | not significant |
| 10682 | CCDC93     | 1.25 | 2.94E-16 | 2.80E-15 | 2341.07  | not significant |
| 10683 | PCGF3      | 1.25 | 1.18E-14 | 9.90E-14 | 2169.32  | not significant |
| 10684 | APH1A      | 1.25 | 4.53E-07 | 1.79E-06 | 777.73   | not significant |
| 10685 | FAM129C    | 1.25 | 1.73E-02 | 3.23E-02 | 93.77    | not significant |
| 10686 | SYCE1L     | 1.25 | 3.12E-02 | 5.46E-02 | 49.57    | not significant |
| 10687 | DAND5      | 1.25 | 3.39E-02 | 5.89E-02 | 16.61    | not significant |
| 10688 | SNN        | 1.25 | 5.28E-11 | 3.18E-10 | 2233.45  | not significant |
| 10689 | LOC440434  | 1.25 | 2.94E-02 | 5.19E-02 | 58.56    | not significant |
| 10690 | LOC729603  | 1.25 | 1.49E-02 | 2.81E-02 | 116.34   | not significant |
| 10691 | TMEM26-AS1 | 1.25 | 2.79E-02 | 4.94E-02 | 13.15    | not significant |
| 10692 | RAB12      | 1.25 | 2.19E-04 | 5.94E-04 | 382.91   | not significant |
| 10693 | POLR3D     | 1.25 | 6.85E-12 | 4.49E-11 | 1604.37  | not significant |
| 10694 | RPL7       | 1.25 | 3.53E-15 | 3.11E-14 | 24172.25 | not significant |
| 10695 | LRRC8A     | 1.25 | 6.20E-10 | 3.36E-09 | 1121.17  | not significant |
| 10696 | TCTA       | 1.26 | 5.45E-07 | 2.13E-06 | 724.99   | not significant |
| 10697 | USP13      | 1.26 | 1.18E-13 | 9.04E-13 | 1806.52  | not significant |
| 10698 | MAN1B1     | 1.26 | 2.96E-08 | 1.35E-07 | 909.08   | not significant |
| 10699 | CDKN2D     | 1.26 | 5.83E-12 | 3.86E-11 | 1735.34  | not significant |
| 10700 | TXLNGY     | 1.26 | 1.88E-03 | 4.26E-03 | 6623.38  | not significant |
| 10701 | ACTG1P4    | 1.26 | 2.97E-02 | 5.24E-02 | 13.15    | not significant |
| 10702 | PYCARD     | 1.26 | 1.87E-03 | 4.25E-03 | 193.42   | not significant |
| 10703 | RMND5B     | 1.26 | 1.48E-06 | 5.49E-06 | 617.43   | not significant |
| 10704 | STAC3      | 1.26 | 2.64E-03 | 5.83E-03 | 217.40   | not significant |
| 10705 | DHTKD1     | 1.26 | 1.67E-14 | 1.38E-13 | 2086.06  | not significant |
| 10706 | ZNF100     | 1.26 | 1.68E-02 | 3.14E-02 | 81.60    | not significant |
| 10707 | SLC9A5     | 1.26 | 4.00E-02 | 6.80E-02 | 28.67    | not significant |
| 10708 | ZNF708     | 1.26 | 1.67E-06 | 6.14E-06 | 758.09   | not significant |
| 10709 | SCCPDH     | 1.26 | 4.02E-14 | 3.20E-13 | 3892.78  | not significant |
| 10710 | GIMAP4     | 1.26 | 1.83E-30 | 4.53E-29 | 11973.22 | not significant |
| 10711 | ZNF833P    | 1.26 | 2.42E-02 | 4.36E-02 | 62.71    | not significant |
| 10712 | CEP170     | 1.26 | 1.45E-06 | 5.39E-06 | 623.59   | not significant |
| 10713 | CLK1       | 1.26 | 1.11E-08 | 5.31E-08 | 1682.48  | not significant |
| 10714 | KLF2       | 1.26 | 1.58E-04 | 4.40E-04 | 349.61   | not significant |
| 10715 | WNT3       | 1.26 | 8.24E-05 | 2.40E-04 | 355.72   | not significant |
| 10716 | BRK1       | 1.26 | 5.28E-19 | 6.28E-18 | 4284.60  | not significant |
| 10717 | DTX1       | 1.26 | 7.62E-34 | 2.40E-32 | 12290.68 | not significant |
| 10718 | DPY19L4    | 1.26 | 4.97E-10 | 2.73E-09 | 1428.82  | not significant |
| 10719 | PTDSS1     | 1.26 | 9.01E-26 | 1.68E-24 | 5938.06  | not significant |
| 10720 | KIZ        | 1.26 | 2.09E-08 | 9.67E-08 | 822.64   | not significant |
| 10721 | ABHD5      | 1.26 | 1.06E-06 | 4.00E-06 | 609.04   | not significant |
| 10722 | CAMK2D     | 1.26 | 4.99E-11 | 3.01E-10 | 1286.17  | not significant |
| 10723 | ZNF282     | 1.26 | 1.70E-14 | 1.40E-13 | 2262.57  | not significant |
| 10724 | KIAA1143   | 1.26 | 8.85E-16 | 8.15E-15 | 2202.92  | not significant |

|       |              |      |          |          |           |                 |
|-------|--------------|------|----------|----------|-----------|-----------------|
| 10725 | RNPEPL1      | 1.26 | 5.73E-13 | 4.13E-12 | 2393.81   | not significant |
| 10726 | RAB43        | 1.26 | 1.76E-02 | 3.28E-02 | 77.54     | not significant |
| 10727 | ALG1L        | 1.26 | 3.82E-02 | 6.53E-02 | 23.09     | not significant |
| 10728 | RPS3         | 1.26 | 2.61E-18 | 2.96E-17 | 43805.94  | not significant |
| 10729 | CASC3        | 1.26 | 1.05E-23 | 1.72E-22 | 5256.56   | not significant |
| 10730 | EEF1A1       | 1.26 | 1.88E-24 | 3.22E-23 | 147547.41 | not significant |
| 10731 | EZH1         | 1.26 | 7.33E-04 | 1.79E-03 | 1261.94   | not significant |
| 10732 | ZBTB41       | 1.26 | 1.50E-08 | 7.01E-08 | 923.71    | not significant |
| 10733 | SOS2         | 1.26 | 2.52E-15 | 2.23E-14 | 2154.77   | not significant |
| 10734 | APEX1        | 1.26 | 1.21E-24 | 2.09E-23 | 8663.43   | not significant |
| 10735 | N4BP2        | 1.26 | 1.01E-26 | 2.01E-25 | 5754.07   | not significant |
| 10736 | DGKD         | 1.26 | 5.21E-17 | 5.33E-16 | 2871.66   | not significant |
| 10737 | STT3B        | 1.26 | 3.02E-33 | 8.96E-32 | 20485.16  | not significant |
| 10738 | HSPBAP1      | 1.26 | 6.31E-04 | 1.56E-03 | 257.21    | not significant |
| 10739 | GGT7         | 1.26 | 2.42E-09 | 1.23E-08 | 1188.81   | not significant |
| 10740 | BCR          | 1.26 | 1.22E-19 | 1.52E-18 | 3696.63   | not significant |
| 10741 | ALKBH7       | 1.26 | 1.55E-07 | 6.47E-07 | 1096.88   | not significant |
| 10742 | AP1S2        | 1.26 | 7.26E-12 | 4.75E-11 | 1344.55   | not significant |
| 10743 | FAM89B       | 1.26 | 1.73E-09 | 8.93E-09 | 1279.86   | not significant |
| 10744 | ADAMTS6      | 1.26 | 1.20E-02 | 2.32E-02 | 103.54    | not significant |
| 10745 | DHRS13       | 1.26 | 3.98E-07 | 1.58E-06 | 662.78    | not significant |
| 10746 | FGD1         | 1.26 | 2.59E-02 | 4.62E-02 | 59.02     | not significant |
| 10747 | ZNF701       | 1.26 | 2.41E-08 | 1.11E-07 | 866.21    | not significant |
| 10748 | UHRF2        | 1.26 | 1.43E-05 | 4.65E-05 | 2857.32   | not significant |
| 10749 | MAPKAPK5-AS1 | 1.26 | 4.65E-10 | 2.56E-09 | 1131.03   | not significant |
| 10750 | C11orf68     | 1.26 | 7.69E-07 | 2.94E-06 | 760.68    | not significant |
| 10751 | CLN6         | 1.26 | 1.33E-15 | 1.21E-14 | 2279.66   | not significant |
| 10752 | TFDP2        | 1.26 | 8.06E-30 | 1.93E-28 | 14256.57  | not significant |
| 10753 | NT5C         | 1.26 | 3.52E-10 | 1.96E-09 | 1054.42   | not significant |
| 10754 | TLL7         | 1.26 | 9.02E-03 | 1.79E-02 | 113.97    | not significant |
| 10755 | ANKRA2       | 1.26 | 1.14E-05 | 3.77E-05 | 498.76    | not significant |
| 10756 | C14orf28     | 1.26 | 4.60E-03 | 9.73E-03 | 136.71    | not significant |
| 10757 | DYM          | 1.26 | 1.15E-17 | 1.24E-16 | 2670.39   | not significant |
| 10758 | RNF19A       | 1.26 | 7.52E-14 | 5.85E-13 | 1718.49   | not significant |
| 10759 | FAM160B1     | 1.26 | 4.22E-11 | 2.57E-10 | 2236.55   | not significant |
| 10760 | MF2          | 1.26 | 7.16E-06 | 2.43E-05 | 470.30    | not significant |
| 10761 | FOXN3        | 1.26 | 4.90E-23 | 7.61E-22 | 4604.13   | not significant |
| 10762 | ZNF605       | 1.27 | 3.72E-07 | 1.49E-06 | 742.59    | not significant |
| 10763 | PSD          | 1.27 | 3.67E-02 | 6.31E-02 | 26.14     | not significant |
| 10764 | TMEM129      | 1.27 | 2.70E-08 | 1.24E-07 | 921.73    | not significant |
| 10765 | PKD1P1       | 1.27 | 5.99E-04 | 1.49E-03 | 288.31    | not significant |
| 10766 | ZNF699       | 1.27 | 7.98E-03 | 1.60E-02 | 111.97    | not significant |
| 10767 | C9orf16      | 1.27 | 1.39E-12 | 9.71E-12 | 1538.22   | not significant |
| 10768 | TBC1D17      | 1.27 | 1.64E-06 | 6.04E-06 | 557.86    | not significant |
| 10769 | ZNF777       | 1.27 | 7.18E-07 | 2.76E-06 | 762.22    | not significant |
| 10770 | CASP4        | 1.27 | 4.10E-11 | 2.50E-10 | 1268.24   | not significant |
| 10771 | TSPAN7       | 1.27 | 6.37E-19 | 7.52E-18 | 5932.29   | not significant |
| 10772 | ZNF555       | 1.27 | 5.51E-03 | 1.14E-02 | 129.51    | not significant |
| 10773 | TAPT1        | 1.27 | 2.58E-15 | 2.29E-14 | 1916.99   | not significant |
| 10774 | PDXDC2P      | 1.27 | 1.91E-02 | 3.51E-02 | 318.50    | not significant |
| 10775 | EPG5         | 1.27 | 1.39E-10 | 8.09E-10 | 1595.31   | not significant |
| 10776 | IRF1         | 1.27 | 3.29E-27 | 6.70E-26 | 8330.52   | not significant |
| 10777 | GLT1D1       | 1.27 | 1.68E-05 | 5.41E-05 | 453.79    | not significant |
| 10778 | TTC9C        | 1.27 | 2.02E-10 | 1.16E-09 | 1061.30   | not significant |
| 10779 | HIST1H1C     | 1.27 | 2.61E-03 | 5.78E-03 | 167.43    | not significant |
| 10780 | APLN         | 1.27 | 2.85E-12 | 1.93E-11 | 1707.08   | not significant |
| 10781 | RPS28        | 1.27 | 1.59E-15 | 1.43E-14 | 10825.41  | not significant |
| 10782 | E2F7         | 1.27 | 4.04E-05 | 1.23E-04 | 2197.78   | not significant |
| 10783 | TMEM57       | 1.27 | 5.29E-16 | 4.96E-15 | 2094.98   | not significant |
| 10784 | RPP25L       | 1.27 | 9.80E-06 | 3.26E-05 | 525.72    | not significant |
| 10785 | GLUL         | 1.27 | 9.73E-36 | 3.43E-34 | 31386.94  | not significant |
| 10786 | ZC3H10       | 1.27 | 4.72E-05 | 1.43E-04 | 354.44    | not significant |
| 10787 | SWT1         | 1.27 | 1.18E-03 | 2.78E-03 | 196.36    | not significant |
| 10788 | TECPR1       | 1.27 | 1.36E-10 | 7.90E-10 | 1545.98   | not significant |
| 10789 | SUN2         | 1.27 | 3.75E-24 | 6.33E-23 | 5221.53   | not significant |
| 10790 | RGS10        | 1.27 | 3.07E-18 | 3.48E-17 | 3359.51   | not significant |
| 10791 | MEGF8        | 1.27 | 2.45E-08 | 1.13E-07 | 928.08    | not significant |
| 10792 | TBX19        | 1.27 | 1.06E-02 | 2.08E-02 | 91.83     | not significant |
| 10793 | SLC25A40     | 1.27 | 8.98E-23 | 1.37E-21 | 3486.87   | not significant |
| 10794 | VIM          | 1.27 | 3.56E-36 | 1.29E-34 | 38939.62  | not significant |
| 10795 | C20orf96     | 1.27 | 2.29E-06 | 8.29E-06 | 670.24    | not significant |
| 10796 | BIN1         | 1.27 | 4.89E-08 | 2.18E-07 | 788.67    | not significant |
| 10797 | LOC100506639 | 1.27 | 1.80E-03 | 4.09E-03 | 183.51    | not significant |
| 10798 | ZNF736       | 1.27 | 1.51E-11 | 9.59E-11 | 1436.19   | not significant |
| 10799 | ZFP36L1      | 1.27 | 1.24E-09 | 6.50E-09 | 955.36    | not significant |
| 10800 | NSUN5P2      | 1.27 | 6.43E-03 | 1.32E-02 | 128.74    | not significant |
| 10801 | SPSB4        | 1.27 | 9.75E-03 | 1.92E-02 | 94.84     | not significant |
| 10802 | RBM22        | 1.27 | 5.71E-21 | 7.78E-20 | 3240.94   | not significant |
| 10803 | CUBN         | 1.27 | 1.08E-02 | 2.10E-02 | 92.44     | not significant |
| 10804 | LAIR1        | 1.27 | 1.05E-10 | 6.13E-10 | 1225.00   | not significant |
| 10805 | LINC00528    | 1.27 | 2.78E-04 | 7.37E-04 | 292.30    | not significant |
| 10806 | ZNF346       | 1.27 | 1.27E-11 | 8.09E-11 | 1248.56   | not significant |
| 10807 | GMDS-AS1     | 1.27 | 1.87E-02 | 3.45E-02 | 74.98     | not significant |
| 10808 | ERAP1        | 1.27 | 1.28E-25 | 2.37E-24 | 5056.21   | not significant |
| 10809 | FGD3         | 1.27 | 9.35E-10 | 4.95E-09 | 1046.15   | not significant |
| 10810 | CTHRC1       | 1.27 | 7.22E-10 | 3.88E-09 | 1055.69   | not significant |
| 10811 | LOC389906    | 1.27 | 4.15E-04 | 1.07E-03 | 243.97    | not significant |
| 10812 | RBM5         | 1.27 | 4.05E-16 | 3.82E-15 | 3305.38   | not significant |

|       |              |      |          |          |          |                 |
|-------|--------------|------|----------|----------|----------|-----------------|
| 10813 | MED12        | 1.27 | 4.33E-04 | 1.11E-03 | 3289.10  | not significant |
| 10814 | ATXN7L3B     | 1.27 | 5.41E-35 | 1.81E-33 | 9258.77  | not significant |
| 10815 | ANKRD10      | 1.27 | 1.96E-16 | 1.90E-15 | 2840.00  | not significant |
| 10816 | UNKL         | 1.27 | 9.16E-06 | 3.06E-05 | 586.01   | not significant |
| 10817 | PACRGL       | 1.27 | 4.44E-05 | 1.35E-04 | 357.00   | not significant |
| 10818 | XYLB         | 1.27 | 3.41E-08 | 1.54E-07 | 731.46   | not significant |
| 10819 | LOC81691     | 1.27 | 8.89E-09 | 4.30E-08 | 850.17   | not significant |
| 10820 | ZBED3        | 1.27 | 1.01E-04 | 2.90E-04 | 318.67   | not significant |
| 10821 | JRK          | 1.27 | 2.16E-04 | 5.85E-04 | 393.80   | not significant |
| 10822 | PCBD2        | 1.27 | 7.22E-07 | 2.78E-06 | 579.37   | not significant |
| 10823 | YPEL4        | 1.27 | 3.35E-02 | 5.83E-02 | 21.12    | not significant |
| 10824 | TNFAIP8      | 1.27 | 4.52E-26 | 8.53E-25 | 4202.60  | not significant |
| 10825 | A1BG         | 1.27 | 3.89E-05 | 1.19E-04 | 397.95   | not significant |
| 10826 | CMPK2        | 1.27 | 6.40E-22 | 9.24E-21 | 2985.60  | not significant |
| 10827 | REST         | 1.27 | 8.81E-21 | 1.18E-19 | 3514.75  | not significant |
| 10828 | FANCE        | 1.27 | 1.70E-07 | 7.08E-07 | 627.70   | not significant |
| 10829 | CPSF1        | 1.27 | 7.32E-17 | 7.37E-16 | 4450.64  | not significant |
| 10830 | PKN1         | 1.27 | 1.73E-23 | 2.78E-22 | 8104.66  | not significant |
| 10831 | HMX3         | 1.27 | 2.47E-02 | 4.44E-02 | 62.15    | not significant |
| 10832 | JARID2       | 1.27 | 1.60E-29 | 3.78E-28 | 5568.27  | not significant |
| 10833 | THBS3        | 1.28 | 4.19E-03 | 8.91E-03 | 130.03   | not significant |
| 10834 | SARM1        | 1.28 | 1.51E-02 | 2.85E-02 | 79.37    | not significant |
| 10835 | TSC22D1      | 1.28 | 1.49E-16 | 1.47E-15 | 2264.88  | not significant |
| 10836 | ARAP1        | 1.28 | 7.79E-07 | 2.98E-06 | 4874.12  | not significant |
| 10837 | FAM193A      | 1.28 | 7.07E-12 | 4.63E-11 | 2047.29  | not significant |
| 10838 | ZNF431       | 1.28 | 2.92E-09 | 1.48E-08 | 1126.24  | not significant |
| 10839 | ELMO1        | 1.28 | 1.99E-35 | 6.88E-34 | 9019.65  | not significant |
| 10840 | SAP30L       | 1.28 | 1.83E-14 | 1.51E-13 | 2263.40  | not significant |
| 10841 | KIAA1407     | 1.28 | 1.29E-02 | 2.48E-02 | 83.17    | not significant |
| 10842 | H6PD         | 1.28 | 5.81E-19 | 6.89E-18 | 2575.14  | not significant |
| 10843 | PCDHGB2      | 1.28 | 3.17E-02 | 5.55E-02 | 32.58    | not significant |
| 10844 | BAHCC1       | 1.28 | 5.27E-21 | 7.20E-20 | 3209.33  | not significant |
| 10845 | ATG13        | 1.28 | 2.62E-20 | 3.42E-19 | 2743.88  | not significant |
| 10846 | ALDH5A1      | 1.28 | 1.45E-22 | 2.18E-21 | 3313.23  | not significant |
| 10847 | CBFA2T2      | 1.28 | 1.66E-15 | 1.49E-14 | 2121.99  | not significant |
| 10848 | ZNF280D      | 1.28 | 8.70E-14 | 6.73E-13 | 1505.00  | not significant |
| 10849 | B1M          | 1.28 | 2.98E-04 | 7.85E-04 | 253.67   | not significant |
| 10850 | ZNF92        | 1.28 | 1.12E-15 | 1.02E-14 | 2040.37  | not significant |
| 10851 | THEM6        | 1.28 | 9.86E-10 | 5.21E-09 | 968.08   | not significant |
| 10852 | FAM131A      | 1.28 | 5.11E-04 | 1.29E-03 | 253.03   | not significant |
| 10853 | PABPC1       | 1.28 | 1.15E-39 | 4.95E-38 | 72273.04 | not significant |
| 10854 | KHDRBS3      | 1.28 | 2.41E-02 | 4.35E-02 | 48.32    | not significant |
| 10855 | ATL3         | 1.28 | 3.33E-28 | 7.23E-27 | 5777.15  | not significant |
| 10856 | DENND5A      | 1.28 | 5.02E-28 | 1.08E-26 | 4847.05  | not significant |
| 10857 | LOC100652768 | 1.28 | 3.31E-02 | 5.76E-02 | 20.19    | not significant |
| 10858 | ZNHIT3       | 1.28 | 1.77E-05 | 5.68E-05 | 367.06   | not significant |
| 10859 | ZNF280C      | 1.28 | 4.53E-06 | 1.58E-05 | 492.03   | not significant |
| 10860 | TXNL1        | 1.28 | 6.96E-21 | 9.41E-20 | 3244.12  | not significant |
| 10861 | FAM189A1     | 1.28 | 2.85E-02 | 5.04E-02 | 38.14    | not significant |
| 10862 | HERC5        | 1.28 | 8.87E-16 | 8.15E-15 | 2465.00  | not significant |
| 10863 | RHOH         | 1.28 | 3.94E-25 | 7.08E-24 | 4153.74  | not significant |
| 10864 | LMF2         | 1.28 | 3.25E-12 | 2.19E-11 | 2244.46  | not significant |
| 10865 | KLHL17       | 1.28 | 2.33E-06 | 8.42E-06 | 672.95   | not significant |
| 10866 | LOC100505812 | 1.28 | 1.03E-04 | 2.95E-04 | 287.87   | not significant |
| 10867 | RPL37        | 1.28 | 1.86E-18 | 2.14E-17 | 20118.11 | not significant |
| 10868 | C12orf10     | 1.28 | 1.80E-12 | 1.24E-11 | 1419.92  | not significant |
| 10869 | BBS1         | 1.28 | 7.32E-05 | 2.15E-04 | 375.35   | not significant |
| 10870 | ZBTB1        | 1.28 | 4.36E-21 | 5.99E-20 | 3282.09  | not significant |
| 10871 | PACS1        | 1.28 | 1.34E-15 | 1.22E-14 | 1874.04  | not significant |
| 10872 | MESP1        | 1.28 | 2.65E-02 | 4.72E-02 | 43.48    | not significant |
| 10873 | TOM1L2       | 1.28 | 1.25E-06 | 4.69E-06 | 507.39   | not significant |
| 10874 | RAP1GAP      | 1.28 | 3.05E-29 | 7.03E-28 | 5263.24  | not significant |
| 10875 | CECR7        | 1.28 | 1.53E-02 | 2.89E-02 | 70.17    | not significant |
| 10876 | TMED4        | 1.28 | 4.36E-18 | 4.87E-17 | 2012.67  | not significant |
| 10877 | RPL18        | 1.28 | 2.72E-27 | 5.56E-26 | 21264.69 | not significant |
| 10878 | MBOAT1       | 1.28 | 7.28E-08 | 3.15E-07 | 716.31   | not significant |
| 10879 | RPS5         | 1.28 | 2.27E-21 | 3.17E-20 | 25147.37 | not significant |
| 10880 | PATZ1        | 1.28 | 1.59E-17 | 1.69E-16 | 3133.76  | not significant |
| 10881 | UBE2Q2P1     | 1.28 | 2.24E-02 | 4.07E-02 | 53.90    | not significant |
| 10882 | MAP9         | 1.28 | 4.51E-06 | 1.57E-05 | 435.24   | not significant |
| 10883 | ARHGAP29     | 1.28 | 3.05E-02 | 5.35E-02 | 18.35    | not significant |
| 10884 | DGAT2        | 1.28 | 3.47E-04 | 9.06E-04 | 245.68   | not significant |
| 10885 | GSDMD        | 1.28 | 4.95E-18 | 5.50E-17 | 2782.41  | not significant |
| 10886 | LRRC28       | 1.28 | 3.00E-13 | 2.21E-12 | 1804.50  | not significant |
| 10887 | ANO6         | 1.28 | 6.35E-32 | 1.72E-30 | 5562.22  | not significant |
| 10888 | DNAH11       | 1.28 | 2.77E-02 | 4.92E-02 | 14.14    | not significant |
| 10889 | ZNF561       | 1.28 | 9.31E-09 | 4.49E-08 | 712.64   | not significant |
| 10890 | NR2C1        | 1.28 | 2.54E-03 | 5.63E-03 | 1623.05  | not significant |
| 10891 | RPL23A       | 1.28 | 8.62E-20 | 1.09E-18 | 9697.55  | not significant |
| 10892 | MPND         | 1.28 | 5.35E-08 | 2.37E-07 | 734.16   | not significant |
| 10893 | P2RY10       | 1.28 | 1.73E-07 | 7.20E-07 | 574.19   | not significant |
| 10894 | CEP131       | 1.28 | 1.39E-10 | 8.07E-10 | 1647.78  | not significant |
| 10895 | CCDC121      | 1.29 | 3.25E-02 | 5.67E-02 | 24.58    | not significant |
| 10896 | UBL7-AS1     | 1.29 | 9.25E-05 | 2.67E-04 | 283.93   | not significant |
| 10897 | QARS         | 1.29 | 1.12E-33 | 3.49E-32 | 6444.89  | not significant |
| 10898 | LHX4-AS1     | 1.29 | 1.50E-03 | 3.48E-03 | 203.88   | not significant |
| 10899 | ZNF430       | 1.29 | 5.11E-12 | 3.39E-11 | 1267.55  | not significant |
| 10900 | NMT2         | 1.29 | 1.89E-11 | 1.18E-10 | 1035.84  | not significant |

|       |              |      |          |          |           |                 |
|-------|--------------|------|----------|----------|-----------|-----------------|
| 10901 | TRAPPC2      | 1.29 | 1.11E-08 | 5.31E-08 | 756.36    | not significant |
| 10902 | DPYSL2       | 1.29 | 2.29E-25 | 4.18E-24 | 3741.11   | not significant |
| 10903 | TOMM7        | 1.29 | 2.52E-12 | 1.72E-11 | 2381.16   | not significant |
| 10904 | BMF          | 1.29 | 1.97E-02 | 3.61E-02 | 54.16     | not significant |
| 10905 | TMEM8B       | 1.29 | 2.01E-05 | 6.39E-05 | 348.75    | not significant |
| 10906 | SLC35D1      | 1.29 | 4.85E-19 | 5.80E-18 | 2332.79   | not significant |
| 10907 | LOC100506127 | 1.29 | 5.75E-03 | 1.19E-02 | 111.51    | not significant |
| 10908 | KLHL6        | 1.29 | 1.43E-17 | 1.53E-16 | 2625.97   | not significant |
| 10909 | MTA3         | 1.29 | 7.60E-25 | 1.33E-23 | 3526.39   | not significant |
| 10910 | ZNF579       | 1.29 | 1.58E-05 | 5.11E-05 | 383.47    | not significant |
| 10911 | ZNF253       | 1.29 | 1.03E-08 | 4.93E-08 | 784.00    | not significant |
| 10912 | PNMA1        | 1.29 | 2.43E-14 | 1.97E-13 | 1598.26   | not significant |
| 10913 | TEN1-CDK3    | 1.29 | 2.81E-02 | 4.97E-02 | 37.99     | not significant |
| 10914 | NUDT18       | 1.29 | 6.87E-05 | 2.02E-04 | 330.37    | not significant |
| 10915 | DVL3         | 1.29 | 4.58E-21 | 6.26E-20 | 4835.26   | not significant |
| 10916 | PKD2         | 1.29 | 1.39E-08 | 6.52E-08 | 774.29    | not significant |
| 10917 | ZNF672       | 1.29 | 9.96E-19 | 1.17E-17 | 2393.49   | not significant |
| 10918 | PAN3         | 1.29 | 1.20E-20 | 1.70E-20 | 2928.70   | not significant |
| 10919 | LMO2         | 1.29 | 2.15E-24 | 3.68E-23 | 7455.23   | not significant |
| 10920 | SEPT7P2      | 1.29 | 3.15E-06 | 1.12E-05 | 445.67    | not significant |
| 10921 | APBB3        | 1.29 | 8.28E-05 | 2.41E-04 | 373.50    | not significant |
| 10922 | GALT         | 1.29 | 6.63E-07 | 2.56E-06 | 617.85    | not significant |
| 10923 | ACSF2        | 1.29 | 2.43E-08 | 1.12E-07 | 737.27    | not significant |
| 10924 | NHEJ1        | 1.29 | 6.35E-09 | 3.10E-08 | 709.47    | not significant |
| 10925 | NEK8         | 1.29 | 6.48E-03 | 1.33E-02 | 97.53     | not significant |
| 10926 | C2CD2        | 1.29 | 6.46E-04 | 1.60E-03 | 210.61    | not significant |
| 10927 | FAM134A      | 1.29 | 2.72E-21 | 3.77E-20 | 3447.25   | not significant |
| 10928 | LINC00638    | 1.29 | 1.84E-02 | 3.40E-02 | 56.19     | not significant |
| 10929 | DCBLD2       | 1.29 | 6.85E-07 | 2.64E-06 | 568.04    | not significant |
| 10930 | ICA1L        | 1.29 | 7.54E-07 | 2.89E-06 | 485.29    | not significant |
| 10931 | LPAR5        | 1.29 | 8.94E-11 | 5.28E-10 | 944.42    | not significant |
| 10932 | NUDT8        | 1.29 | 1.01E-04 | 2.90E-04 | 344.46    | not significant |
| 10933 | LINC00657    | 1.29 | 3.66E-36 | 1.32E-34 | 11863.01  | not significant |
| 10934 | SORL1        | 1.29 | 4.57E-19 | 5.48E-18 | 3767.73   | not significant |
| 10935 | ACRC         | 1.29 | 1.96E-02 | 3.59E-02 | 54.55     | not significant |
| 10936 | ZNF439       | 1.29 | 7.39E-05 | 2.16E-04 | 398.69    | not significant |
| 10937 | EIF1B        | 1.29 | 9.27E-11 | 5.47E-10 | 1518.04   | not significant |
| 10938 | GIMAP6       | 1.29 | 2.31E-29 | 5.37E-28 | 4955.06   | not significant |
| 10939 | PCSK5        | 1.29 | 4.30E-04 | 1.10E-03 | 217.03    | not significant |
| 10940 | AJUBA        | 1.29 | 2.35E-05 | 7.40E-05 | 380.82    | not significant |
| 10941 | ZNF8         | 1.29 | 4.63E-05 | 1.40E-04 | 324.71    | not significant |
| 10942 | MAU2         | 1.29 | 3.38E-22 | 4.96E-21 | 3141.55   | not significant |
| 10943 | LOC642846    | 1.29 | 2.88E-03 | 6.32E-03 | 834.49    | not significant |
| 10944 | TUBB         | 1.29 | 7.73E-18 | 8.44E-17 | 12417.24  | not significant |
| 10945 | MBTD1        | 1.29 | 5.14E-18 | 5.69E-17 | 2391.74   | not significant |
| 10946 | ZNF653       | 1.29 | 1.31E-04 | 3.68E-04 | 258.42    | not significant |
| 10947 | ZNF442       | 1.29 | 1.42E-02 | 2.70E-02 | 65.54     | not significant |
| 10948 | PASK         | 1.29 | 2.21E-14 | 1.80E-13 | 1534.20   | not significant |
| 10949 | ZNF726       | 1.29 | 1.15E-04 | 3.25E-04 | 266.08    | not significant |
| 10950 | SEC1P        | 1.29 | 2.23E-02 | 4.04E-02 | 11.38     | not significant |
| 10951 | LSM8         | 1.29 | 2.53E-24 | 4.31E-23 | 3381.57   | not significant |
| 10952 | ARRDC1       | 1.29 | 1.20E-07 | 5.06E-07 | 634.51    | not significant |
| 10953 | TCTN2        | 1.29 | 1.55E-03 | 3.58E-03 | 151.74    | not significant |
| 10954 | HSCB         | 1.29 | 2.40E-05 | 7.55E-05 | 355.03    | not significant |
| 10955 | SSR2         | 1.29 | 2.28E-29 | 5.31E-28 | 6706.83   | not significant |
| 10956 | U2AF1L4      | 1.29 | 1.41E-04 | 3.95E-04 | 280.21    | not significant |
| 10957 | ZNF426       | 1.29 | 6.72E-08 | 2.93E-07 | 588.81    | not significant |
| 10958 | ZNF12        | 1.29 | 1.37E-15 | 1.24E-14 | 1780.47   | not significant |
| 10959 | CHML         | 1.29 | 3.90E-25 | 7.04E-24 | 3981.45   | not significant |
| 10960 | PGPEP1       | 1.29 | 1.33E-13 | 1.01E-12 | 1353.19   | not significant |
| 10961 | RSAD2        | 1.29 | 6.42E-16 | 5.99E-15 | 1621.24   | not significant |
| 10962 | UTY          | 1.29 | 3.09E-09 | 1.56E-08 | 1220.39   | not significant |
| 10963 | LINC00861    | 1.29 | 2.56E-03 | 5.68E-03 | 163.23    | not significant |
| 10964 | ELP2         | 1.29 | 2.33E-17 | 2.45E-16 | 1892.63   | not significant |
| 10965 | GPAA1        | 1.29 | 1.04E-09 | 5.47E-09 | 808.23    | not significant |
| 10966 | LOC101928865 | 1.29 | 1.57E-02 | 2.95E-02 | 66.37     | not significant |
| 10967 | RORA         | 1.29 | 3.82E-11 | 2.34E-10 | 1283.80   | not significant |
| 10968 | EEF2         | 1.29 | 7.61E-33 | 2.21E-31 | 110535.15 | not significant |
| 10969 | UBE2B        | 1.29 | 8.78E-16 | 8.09E-15 | 2159.72   | not significant |
| 10970 | LOC374443    | 1.29 | 1.83E-03 | 4.15E-03 | 170.15    | not significant |
| 10971 | FAM174A      | 1.30 | 2.90E-03 | 6.35E-03 | 132.83    | not significant |
| 10972 | CRTC3        | 1.30 | 2.32E-18 | 2.64E-17 | 2070.42   | not significant |
| 10973 | NAB1         | 1.30 | 3.08E-15 | 2.72E-14 | 1800.53   | not significant |
| 10974 | DONSON       | 1.30 | 3.79E-16 | 3.58E-15 | 1681.75   | not significant |
| 10975 | NAT9         | 1.30 | 1.03E-10 | 6.07E-10 | 937.75    | not significant |
| 10976 | MDM4         | 1.30 | 2.18E-05 | 6.91E-05 | 2196.70   | not significant |
| 10977 | SNX24        | 1.30 | 3.51E-03 | 7.58E-03 | 117.48    | not significant |
| 10978 | ZNF566       | 1.30 | 1.46E-06 | 5.43E-06 | 458.34    | not significant |
| 10979 | ZNF441       | 1.30 | 6.85E-04 | 1.68E-03 | 202.39    | not significant |
| 10980 | NLE1         | 1.30 | 1.32E-13 | 1.01E-12 | 1280.18   | not significant |
| 10981 | SYT1         | 1.30 | 6.61E-12 | 4.35E-11 | 995.79    | not significant |
| 10982 | LOC493754    | 1.30 | 5.06E-08 | 2.24E-07 | 578.05    | not significant |
| 10983 | ZADH2        | 1.30 | 2.65E-13 | 1.97E-12 | 1247.85   | not significant |
| 10984 | PIDD1        | 1.30 | 1.63E-14 | 1.35E-13 | 2143.68   | not significant |
| 10985 | BCL2L11      | 1.30 | 2.20E-12 | 1.50E-11 | 1222.53   | not significant |
| 10986 | BMI1         | 1.30 | 1.38E-04 | 3.86E-04 | 276.54    | not significant |
| 10987 | FLJ31306     | 1.30 | 7.02E-13 | 5.02E-12 | 1602.93   | not significant |
| 10988 | TMEM107      | 1.30 | 6.60E-05 | 1.95E-04 | 305.49    | not significant |

|       |                |      |          |          |          |                 |
|-------|----------------|------|----------|----------|----------|-----------------|
| 10989 | RMND1          | 1.30 | 5.31E-07 | 2.08E-06 | 529.50   | not significant |
| 10990 | IRGQ           | 1.30 | 1.77E-08 | 8.25E-08 | 656.33   | not significant |
| 10991 | AGAP3          | 1.30 | 3.58E-06 | 1.26E-05 | 398.42   | not significant |
| 10992 | NBPF12         | 1.30 | 2.36E-02 | 4.25E-02 | 39.28    | not significant |
| 10993 | ITGB4          | 1.30 | 1.62E-02 | 3.03E-02 | 58.65    | not significant |
| 10994 | GDI1           | 1.30 | 1.97E-10 | 1.13E-09 | 864.35   | not significant |
| 10995 | HNRNPA1        | 1.30 | 2.89E-19 | 3.53E-18 | 2534.62  | not significant |
| 10996 | ISG20          | 1.30 | 1.21E-03 | 2.85E-03 | 159.46   | not significant |
| 10997 | PAWR           | 1.30 | 6.44E-11 | 3.85E-10 | 901.10   | not significant |
| 10998 | CPNE1          | 1.30 | 2.89E-34 | 9.36E-33 | 5844.79  | not significant |
| 10999 | ASPDH          | 1.30 | 5.57E-03 | 1.16E-02 | 96.35    | not significant |
| 11000 | CIR1           | 1.30 | 6.60E-12 | 4.34E-11 | 1183.59  | not significant |
| 11001 | DGCR14         | 1.30 | 8.25E-11 | 4.88E-10 | 1030.95  | not significant |
| 11002 | DDT            | 1.30 | 1.35E-08 | 6.38E-08 | 743.01   | not significant |
| 11003 | GID4           | 1.30 | 3.53E-13 | 2.58E-12 | 1228.89  | not significant |
| 11004 | ERP29          | 1.30 | 2.45E-22 | 3.63E-21 | 7753.78  | not significant |
| 11005 | SIX3           | 1.30 | 1.37E-06 | 5.13E-06 | 436.85   | not significant |
| 11006 | NPC2           | 1.30 | 4.03E-11 | 2.46E-10 | 1152.88  | not significant |
| 11007 | CENPQ          | 1.30 | 2.63E-11 | 1.63E-10 | 967.56   | not significant |
| 11008 | KDELR1         | 1.30 | 7.30E-23 | 1.12E-21 | 3465.45  | not significant |
| 11009 | TOX            | 1.30 | 2.98E-33 | 8.88E-32 | 7548.49  | not significant |
| 11010 | C5orf34        | 1.30 | 1.62E-06 | 5.98E-06 | 444.25   | not significant |
| 11011 | RPL13          | 1.30 | 2.53E-18 | 2.88E-17 | 40439.67 | not significant |
| 11012 | PNKP           | 1.30 | 1.93E-09 | 9.90E-09 | 754.75   | not significant |
| 11013 | AMOT           | 1.30 | 2.44E-14 | 1.99E-13 | 1270.68  | not significant |
| 11014 | RPL14          | 1.30 | 2.68E-27 | 5.50E-26 | 16347.32 | not significant |
| 11015 | TMEM175        | 1.30 | 6.01E-08 | 2.64E-07 | 636.55   | not significant |
| 11016 | ING3           | 1.30 | 2.60E-12 | 1.77E-11 | 1022.09  | not significant |
| 11017 | LMBRD1         | 1.30 | 7.17E-13 | 5.12E-12 | 1145.89  | not significant |
| 11018 | MEI1           | 1.30 | 1.56E-02 | 2.94E-02 | 58.39    | not significant |
| 11019 | KIAA1958       | 1.30 | 5.49E-10 | 3.00E-09 | 861.33   | not significant |
| 11020 | SH2D1A         | 1.30 | 4.58E-37 | 1.75E-35 | 14779.95 | not significant |
| 11021 | ZCCHC7         | 1.30 | 5.21E-12 | 3.45E-11 | 1094.50  | not significant |
| 11022 | FRS3           | 1.30 | 1.04E-03 | 2.48E-03 | 156.86   | not significant |
| 11023 | CDC42BPG       | 1.31 | 7.38E-05 | 2.16E-04 | 254.04   | not significant |
| 11024 | GADD45A        | 1.31 | 1.71E-03 | 3.90E-03 | 137.75   | not significant |
| 11025 | RPS4X          | 1.31 | 2.93E-31 | 7.60E-30 | 33106.11 | not significant |
| 11026 | PEX5L          | 1.31 | 3.76E-23 | 5.90E-22 | 3330.58  | not significant |
| 11027 | VPS51          | 1.31 | 3.17E-17 | 3.28E-16 | 3813.03  | not significant |
| 11028 | LRRC27         | 1.31 | 1.60E-03 | 3.69E-03 | 142.72   | not significant |
| 11029 | RPS6KA5        | 1.31 | 2.51E-06 | 9.04E-06 | 442.01   | not significant |
| 11030 | INPP5E         | 1.31 | 1.20E-08 | 5.70E-08 | 807.51   | not significant |
| 11031 | GNPTG          | 1.31 | 8.41E-10 | 4.47E-09 | 736.17   | not significant |
| 11032 | ZNF266         | 1.31 | 4.27E-20 | 5.47E-19 | 2608.24  | not significant |
| 11033 | GBAP1          | 1.31 | 1.16E-03 | 2.74E-03 | 153.21   | not significant |
| 11034 | SETDB1         | 1.31 | 6.35E-19 | 7.51E-18 | 2138.35  | not significant |
| 11035 | ZNF767P        | 1.31 | 1.88E-03 | 4.26E-03 | 750.09   | not significant |
| 11036 | MTURN          | 1.31 | 1.16E-04 | 3.29E-04 | 254.30   | not significant |
| 11037 | TMED1          | 1.31 | 2.97E-06 | 1.06E-05 | 389.76   | not significant |
| 11038 | ULK3           | 1.31 | 1.54E-13 | 1.17E-12 | 1488.77  | not significant |
| 11039 | IRX5           | 1.31 | 4.56E-07 | 1.80E-06 | 538.02   | not significant |
| 11040 | EMC3-AS1       | 1.31 | 1.95E-11 | 1.22E-10 | 998.05   | not significant |
| 11041 | TVP23C         | 1.31 | 2.15E-03 | 4.82E-03 | 130.55   | not significant |
| 11042 | TRIM69         | 1.31 | 1.74E-02 | 3.24E-02 | 46.97    | not significant |
| 11043 | FZD5           | 1.31 | 1.37E-03 | 3.21E-03 | 152.06   | not significant |
| 11044 | LIN54          | 1.31 | 8.85E-21 | 1.19E-19 | 2709.83  | not significant |
| 11045 | LMBR1L         | 1.31 | 7.20E-14 | 5.61E-13 | 1159.55  | not significant |
| 11046 | LY9            | 1.31 | 2.22E-06 | 8.03E-06 | 416.44   | not significant |
| 11047 | LOC100130987   | 1.31 | 2.50E-02 | 4.48E-02 | 31.18    | not significant |
| 11048 | FAM117A        | 1.31 | 1.23E-18 | 1.43E-17 | 1723.97  | not significant |
| 11049 | GPLD1          | 1.31 | 5.47E-03 | 1.14E-02 | 104.90   | not significant |
| 11050 | ENTHD2         | 1.31 | 5.11E-10 | 2.80E-09 | 1015.35  | not significant |
| 11051 | MPPE1          | 1.31 | 2.59E-08 | 1.19E-07 | 572.83   | not significant |
| 11052 | ZNF852         | 1.31 | 2.02E-04 | 5.50E-04 | 225.17   | not significant |
| 11053 | STAG3L5P-PVRIG | 1.31 | 1.50E-04 | 4.18E-04 | 1180.25  | not significant |
| 11054 | RAB11FIP3      | 1.31 | 7.63E-22 | 1.10E-20 | 2347.67  | not significant |
| 11055 | KDELC2         | 1.31 | 4.03E-23 | 6.29E-22 | 3651.99  | not significant |
| 11056 | CHD6           | 1.31 | 1.66E-33 | 5.05E-32 | 4797.46  | not significant |
| 11057 | ZSWIM4         | 1.31 | 2.82E-07 | 1.14E-06 | 496.88   | not significant |
| 11058 | ZNF646         | 1.31 | 1.46E-17 | 1.56E-16 | 1621.04  | not significant |
| 11059 | ZMAT1          | 1.31 | 1.29E-03 | 3.04E-03 | 156.65   | not significant |
| 11060 | PCIF1          | 1.31 | 1.86E-22 | 2.78E-21 | 2908.63  | not significant |
| 11061 | RABEP2         | 1.31 | 1.56E-09 | 8.10E-09 | 654.52   | not significant |
| 11062 | ABL1           | 1.31 | 1.97E-24 | 3.38E-23 | 3813.51  | not significant |
| 11063 | SLC41A3        | 1.31 | 1.71E-14 | 1.41E-13 | 1271.09  | not significant |
| 11064 | DDX12P         | 1.31 | 1.79E-03 | 4.08E-03 | 1141.08  | not significant |
| 11065 | SH3PXD2A       | 1.31 | 7.49E-25 | 1.31E-23 | 3069.12  | not significant |
| 11066 | TSPAN3         | 1.31 | 1.90E-22 | 2.84E-21 | 4104.21  | not significant |
| 11067 | SARAF          | 1.31 | 5.95E-31 | 1.52E-29 | 8143.49  | not significant |
| 11068 | SHROOM1        | 1.31 | 2.28E-02 | 4.13E-02 | 34.90    | not significant |
| 11069 | ACYP1          | 1.31 | 6.64E-11 | 3.97E-10 | 822.65   | not significant |
| 11070 | 43529_13977    | 1.31 | 1.51E-20 | 1.99E-19 | 2024.36  | not significant |
| 11071 | AMOTL1         | 1.31 | 7.65E-05 | 2.24E-04 | 245.49   | not significant |
| 11072 | LOC283922      | 1.31 | 1.56E-03 | 3.60E-03 | 140.53   | not significant |
| 11073 | P DPR          | 1.31 | 2.62E-28 | 5.73E-27 | 4258.76  | not significant |
| 11074 | DISP1          | 1.31 | 6.49E-04 | 1.60E-03 | 162.95   | not significant |
| 11075 | CNOT6L         | 1.32 | 1.85E-22 | 2.76E-21 | 2569.12  | not significant |
| 11076 | DGAT1          | 1.32 | 1.43E-12 | 1.00E-11 | 1012.74  | not significant |

|       |              |      |          |          |          |                 |
|-------|--------------|------|----------|----------|----------|-----------------|
| 11077 | RNF31        | 1.32 | 6.32E-20 | 8.03E-19 | 2670.80  | not significant |
| 11078 | IFI44        | 1.32 | 4.00E-10 | 2.21E-09 | 729.33   | not significant |
| 11079 | GPATCH3      | 1.32 | 8.54E-08 | 3.68E-07 | 598.98   | not significant |
| 11080 | FAM57A       | 1.32 | 1.67E-05 | 5.39E-05 | 307.49   | not significant |
| 11081 | DTX3         | 1.32 | 1.43E-17 | 1.53E-16 | 2067.13  | not significant |
| 11082 | LOC100133091 | 1.32 | 2.52E-03 | 5.58E-03 | 112.83   | not significant |
| 11083 | TMEM254      | 1.32 | 1.86E-10 | 1.06E-09 | 731.82   | not significant |
| 11084 | LINC01232    | 1.32 | 5.69E-03 | 1.18E-02 | 87.62    | not significant |
| 11085 | ABCA7        | 1.32 | 1.42E-12 | 9.89E-12 | 1545.29  | not significant |
| 11086 | POLM         | 1.32 | 6.28E-25 | 1.12E-23 | 4107.60  | not significant |
| 11087 | HEXDC        | 1.32 | 4.04E-14 | 3.22E-13 | 1234.06  | not significant |
| 11088 | NOB1         | 1.32 | 8.26E-28 | 1.76E-26 | 3369.06  | not significant |
| 11089 | C2CD5        | 1.32 | 2.97E-19 | 3.62E-18 | 2968.81  | not significant |
| 11090 | ZFAND2A      | 1.32 | 4.88E-05 | 1.47E-04 | 256.65   | not significant |
| 11091 | CNIH1        | 1.32 | 2.58E-27 | 5.32E-26 | 3754.36  | not significant |
| 11092 | C11orf1      | 1.32 | 6.18E-04 | 1.54E-03 | 159.93   | not significant |
| 11093 | AK3          | 1.32 | 4.18E-21 | 5.76E-20 | 1942.13  | not significant |
| 11094 | ZNF224       | 1.32 | 2.83E-03 | 6.23E-03 | 554.95   | not significant |
| 11095 | STAT2        | 1.32 | 4.52E-16 | 4.25E-15 | 2468.68  | not significant |
| 11096 | KIAA0368     | 1.32 | 6.51E-27 | 1.30E-25 | 3158.30  | not significant |
| 11097 | SAC3D1       | 1.32 | 1.75E-12 | 1.20E-11 | 1441.53  | not significant |
| 11098 | DDX11L2      | 1.32 | 2.57E-02 | 4.59E-02 | 25.93    | not significant |
| 11099 | TTC32        | 1.32 | 2.86E-05 | 8.92E-05 | 270.73   | not significant |
| 11100 | RBBP9        | 1.32 | 2.60E-14 | 2.11E-13 | 1198.90  | not significant |
| 11101 | NLR3         | 1.32 | 7.84E-24 | 1.29E-22 | 2834.76  | not significant |
| 11102 | ZXDB         | 1.32 | 1.29E-06 | 4.84E-06 | 399.56   | not significant |
| 11103 | POLR1E       | 1.32 | 7.08E-16 | 6.58E-15 | 1764.00  | not significant |
| 11104 | C18orf21     | 1.32 | 3.06E-10 | 1.71E-09 | 718.27   | not significant |
| 11105 | GINM1        | 1.32 | 1.83E-10 | 1.05E-09 | 721.06   | not significant |
| 11106 | RM12         | 1.32 | 2.37E-15 | 2.11E-14 | 1526.86  | not significant |
| 11107 | RPS15A       | 1.32 | 5.02E-31 | 1.29E-29 | 16247.95 | not significant |
| 11108 | ST3GAL3      | 1.32 | 1.03E-07 | 4.41E-07 | 498.87   | not significant |
| 11109 | ZNF302       | 1.32 | 7.75E-16 | 7.18E-15 | 1272.43  | not significant |
| 11110 | RPS14        | 1.32 | 1.27E-30 | 3.16E-29 | 18277.19 | not significant |
| 11111 | RCS1         | 1.32 | 1.56E-31 | 4.13E-30 | 7383.69  | not significant |
| 11112 | PRKCSH       | 1.32 | 2.20E-37 | 8.58E-36 | 9453.11  | not significant |
| 11113 | RENP1        | 1.32 | 2.18E-03 | 4.90E-03 | 130.51   | not significant |
| 11114 | ZNF506       | 1.32 | 6.66E-12 | 4.38E-11 | 1071.83  | not significant |
| 11115 | CHST11       | 1.32 | 1.75E-37 | 6.89E-36 | 18500.97 | not significant |
| 11116 | C22orf34     | 1.32 | 1.08E-04 | 3.08E-04 | 228.85   | not significant |
| 11117 | CDKN1C       | 1.32 | 1.90E-02 | 3.50E-02 | 12.34    | not significant |
| 11118 | GTF3C5       | 1.32 | 6.49E-39 | 2.71E-37 | 7231.80  | not significant |
| 11119 | SLC14A1      | 1.32 | 1.07E-03 | 2.55E-03 | 142.94   | not significant |
| 11120 | TAL1         | 1.32 | 3.13E-07 | 1.26E-06 | 463.44   | not significant |
| 11121 | ZFYVE1       | 1.32 | 4.58E-13 | 3.32E-12 | 1001.44  | not significant |
| 11122 | MEX3A        | 1.32 | 2.57E-16 | 2.46E-15 | 1329.63  | not significant |
| 11123 | CLK4         | 1.32 | 7.79E-08 | 3.37E-07 | 531.12   | not significant |
| 11124 | C7orf55      | 1.32 | 2.84E-03 | 6.23E-03 | 106.71   | not significant |
| 11125 | LOC100287015 | 1.32 | 9.05E-04 | 2.18E-03 | 150.01   | not significant |
| 11126 | ATG4D        | 1.32 | 2.71E-16 | 2.59E-15 | 1420.43  | not significant |
| 11127 | LIMS2        | 1.32 | 1.59E-10 | 9.16E-10 | 791.50   | not significant |
| 11128 | LOC644961    | 1.33 | 5.23E-03 | 1.09E-02 | 85.17    | not significant |
| 11129 | JAK3         | 1.33 | 1.37E-11 | 8.74E-11 | 1160.42  | not significant |
| 11130 | SMAGP        | 1.33 | 1.93E-06 | 7.06E-06 | 366.92   | not significant |
| 11131 | C19orf66     | 1.33 | 4.24E-18 | 4.75E-17 | 1578.33  | not significant |
| 11132 | PCBP2        | 1.33 | 8.29E-54 | 5.96E-52 | 26809.86 | not significant |
| 11133 | ZNF362       | 1.33 | 1.71E-18 | 1.98E-17 | 1820.99  | not significant |
| 11134 | CTDSP1       | 1.33 | 2.97E-24 | 5.03E-23 | 2743.56  | not significant |
| 11135 | GUCY1B2      | 1.33 | 9.75E-03 | 1.92E-02 | 63.69    | not significant |
| 11136 | ZDHHC15      | 1.33 | 1.64E-04 | 4.55E-04 | 209.38   | not significant |
| 11137 | RRN3P3       | 1.33 | 6.96E-05 | 2.05E-04 | 252.54   | not significant |
| 11138 | PHC2         | 1.33 | 4.59E-28 | 9.90E-27 | 3933.89  | not significant |
| 11139 | PIGM         | 1.33 | 2.07E-10 | 1.18E-09 | 855.04   | not significant |
| 11140 | TNIP1        | 1.33 | 1.43E-33 | 4.40E-32 | 4011.42  | not significant |
| 11141 | GNB2L1       | 1.33 | 1.13E-31 | 3.02E-30 | 36811.33 | not significant |
| 11142 | EVA1B        | 1.33 | 2.34E-02 | 4.23E-02 | 16.24    | not significant |
| 11143 | PTCH2        | 1.33 | 8.38E-12 | 5.45E-11 | 974.48   | not significant |
| 11144 | POMK         | 1.33 | 2.41E-04 | 6.46E-04 | 185.99   | not significant |
| 11145 | PELI2        | 1.33 | 1.78E-26 | 3.46E-25 | 2464.12  | not significant |
| 11146 | PHYKPL       | 1.33 | 1.45E-14 | 1.21E-13 | 1261.67  | not significant |
| 11147 | RPAIN        | 1.33 | 3.11E-20 | 4.00E-19 | 1833.50  | not significant |
| 11148 | MAGEF1       | 1.33 | 2.55E-09 | 1.30E-08 | 622.19   | not significant |
| 11149 | FBXL6        | 1.33 | 2.96E-04 | 7.80E-04 | 178.75   | not significant |
| 11150 | TMEM101      | 1.33 | 7.57E-08 | 3.27E-07 | 462.38   | not significant |
| 11151 | ABCC1        | 1.33 | 7.05E-27 | 1.41E-25 | 7122.25  | not significant |
| 11152 | LYSMD1       | 1.33 | 1.95E-08 | 9.05E-08 | 546.14   | not significant |
| 11153 | RPL3         | 1.33 | 7.30E-34 | 2.31E-32 | 56790.01 | not significant |
| 11154 | TMSB15B      | 1.33 | 3.94E-03 | 8.44E-03 | 90.80    | not significant |
| 11155 | NBR2         | 1.33 | 7.32E-03 | 1.48E-02 | 76.20    | not significant |
| 11156 | ABHD12       | 1.33 | 2.09E-20 | 2.73E-19 | 2293.90  | not significant |
| 11157 | LINC00938    | 1.33 | 4.37E-14 | 3.47E-13 | 1173.89  | not significant |
| 11158 | PIK3IP1      | 1.33 | 5.76E-03 | 1.19E-02 | 79.78    | not significant |
| 11159 | DDX58        | 1.33 | 1.15E-19 | 1.44E-18 | 1759.54  | not significant |
| 11160 | C5orf45      | 1.33 | 1.84E-04 | 5.06E-04 | 215.10   | not significant |
| 11161 | RPS25        | 1.33 | 4.13E-06 | 1.44E-05 | 7551.94  | not significant |
| 11162 | SCD5         | 1.33 | 4.76E-19 | 5.70E-18 | 2102.06  | not significant |
| 11163 | SLIT1        | 1.33 | 2.82E-33 | 8.45E-32 | 11926.06 | not significant |
| 11164 | DNAJB9       | 1.33 | 3.49E-06 | 1.23E-05 | 358.36   | not significant |

|       |              |      |          |          |          |                 |
|-------|--------------|------|----------|----------|----------|-----------------|
| 11165 | CBLB         | 1.33 | 2.80E-05 | 8.75E-05 | 256.86   | not significant |
| 11166 | ZDBF2        | 1.33 | 2.06E-02 | 3.77E-02 | 30.52    | not significant |
| 11167 | XKR8         | 1.33 | 4.84E-07 | 1.90E-06 | 420.55   | not significant |
| 11168 | HECA         | 1.33 | 1.21E-24 | 2.09E-23 | 2704.37  | not significant |
| 11169 | CXorf23      | 1.34 | 2.74E-05 | 8.55E-05 | 266.40   | not significant |
| 11170 | 43532_13639  | 1.34 | 1.53E-04 | 4.26E-04 | 217.63   | not significant |
| 11171 | CCBL2        | 1.34 | 1.26E-13 | 9.60E-13 | 1023.18  | not significant |
| 11172 | GPR137B      | 1.34 | 2.60E-05 | 8.13E-05 | 270.38   | not significant |
| 11173 | VPS11        | 1.34 | 2.72E-07 | 1.11E-06 | 401.66   | not significant |
| 11174 | AMT          | 1.34 | 1.80E-03 | 4.11E-03 | 116.64   | not significant |
| 11175 | LINC01000    | 1.34 | 6.55E-04 | 1.62E-03 | 1923.86  | not significant |
| 11176 | SEC31B       | 1.34 | 2.16E-03 | 4.86E-03 | 15660.34 | not significant |
| 11177 | ZFAND1       | 1.34 | 8.20E-15 | 6.98E-14 | 1099.38  | not significant |
| 11178 | ZNF175       | 1.34 | 5.06E-11 | 3.06E-10 | 768.76   | not significant |
| 11179 | VIPR2        | 1.34 | 8.57E-32 | 2.31E-30 | 3606.81  | not significant |
| 11180 | MGAT4A       | 1.34 | 2.61E-40 | 1.17E-38 | 6887.74  | not significant |
| 11181 | RPL22        | 1.34 | 8.05E-28 | 1.72E-26 | 6627.68  | not significant |
| 11182 | CTXN1        | 1.34 | 4.74E-04 | 1.21E-03 | 230.58   | not significant |
| 11183 | ASAP2        | 1.34 | 3.17E-05 | 9.83E-05 | 237.13   | not significant |
| 11184 | AIP          | 1.34 | 7.39E-28 | 1.58E-26 | 4184.09  | not significant |
| 11185 | ABLIM1       | 1.34 | 3.11E-35 | 1.05E-33 | 6007.26  | not significant |
| 11186 | FLJ22447     | 1.34 | 2.32E-02 | 4.18E-02 | 21.10    | not significant |
| 11187 | CHST12       | 1.34 | 3.20E-18 | 3.62E-17 | 3173.43  | not significant |
| 11188 | PTPRK        | 1.34 | 8.61E-25 | 1.50E-23 | 2198.47  | not significant |
| 11189 | TMEM180      | 1.34 | 1.38E-09 | 7.16E-09 | 586.32   | not significant |
| 11190 | INPPL1       | 1.34 | 2.07E-33 | 6.27E-32 | 4351.55  | not significant |
| 11191 | PDCD7        | 1.34 | 3.21E-26 | 6.12E-25 | 2867.51  | not significant |
| 11192 | FAM69B       | 1.34 | 4.83E-06 | 1.67E-05 | 296.90   | not significant |
| 11193 | PCSK4        | 1.34 | 2.26E-04 | 6.11E-04 | 255.51   | not significant |
| 11194 | LOC101929099 | 1.34 | 2.05E-02 | 3.75E-02 | 28.61    | not significant |
| 11195 | C5orf24      | 1.34 | 1.22E-14 | 1.02E-13 | 1637.50  | not significant |
| 11196 | ZCWPW1       | 1.34 | 4.42E-03 | 9.38E-03 | 82.18    | not significant |
| 11197 | LOC284023    | 1.34 | 2.89E-06 | 1.03E-05 | 322.04   | not significant |
| 11198 | ICAM3        | 1.34 | 4.08E-27 | 8.24E-26 | 3685.52  | not significant |
| 11199 | MARK4        | 1.34 | 5.15E-18 | 5.71E-17 | 1623.07  | not significant |
| 11200 | ALG1L2       | 1.34 | 2.04E-02 | 3.74E-02 | 12.86    | not significant |
| 11201 | MUS81        | 1.34 | 3.23E-17 | 3.35E-16 | 1473.29  | not significant |
| 11202 | IPO7         | 1.34 | 4.21E-54 | 3.08E-52 | 17570.66 | not significant |
| 11203 | ASL          | 1.34 | 1.37E-03 | 3.19E-03 | 116.11   | not significant |
| 11204 | RPS10P7      | 1.34 | 5.42E-03 | 1.13E-02 | 72.68    | not significant |
| 11205 | ATM          | 1.34 | 5.53E-07 | 2.16E-06 | 4581.05  | not significant |
| 11206 | ALDH6A1      | 1.34 | 1.02E-12 | 7.25E-12 | 835.53   | not significant |
| 11207 | ZNF524       | 1.34 | 5.03E-04 | 1.27E-03 | 152.43   | not significant |
| 11208 | ZNF319       | 1.34 | 6.04E-10 | 3.28E-09 | 598.16   | not significant |
| 11209 | ST8SIA1      | 1.34 | 2.62E-03 | 5.80E-03 | 95.94    | not significant |
| 11210 | SLC8A1-AS1   | 1.34 | 3.06E-05 | 9.50E-05 | 229.80   | not significant |
| 11211 | CDKL2        | 1.34 | 2.18E-02 | 3.97E-02 | 22.35    | not significant |
| 11212 | PSMG2        | 1.34 | 1.64E-26 | 3.19E-25 | 2555.54  | not significant |
| 11213 | ZNF32        | 1.34 | 2.55E-14 | 2.07E-13 | 983.93   | not significant |
| 11214 | CD69         | 1.34 | 1.26E-15 | 1.14E-14 | 1418.60  | not significant |
| 11215 | TTYH3        | 1.34 | 4.08E-27 | 8.24E-26 | 3782.10  | not significant |
| 11216 | FAM167A      | 1.34 | 2.07E-02 | 3.78E-02 | 26.31    | not significant |
| 11217 | ZBTB20       | 1.34 | 1.85E-03 | 4.21E-03 | 105.31   | not significant |
| 11218 | CCDC183-AS1  | 1.34 | 1.98E-02 | 3.64E-02 | 31.74    | not significant |
| 11219 | RNF214       | 1.34 | 2.84E-11 | 1.76E-10 | 830.00   | not significant |
| 11220 | ZNF627       | 1.35 | 5.17E-09 | 2.55E-08 | 512.02   | not significant |
| 11221 | CCR8         | 1.35 | 1.69E-15 | 1.52E-14 | 1213.10  | not significant |
| 11222 | WBP1         | 1.35 | 8.06E-03 | 1.61E-02 | 64.49    | not significant |
| 11223 | KIAA1875     | 1.35 | 1.36E-02 | 2.60E-02 | 49.36    | not significant |
| 11224 | FGD5         | 1.35 | 3.99E-09 | 1.99E-08 | 517.94   | not significant |
| 11225 | HES6         | 1.35 | 8.23E-06 | 2.77E-05 | 308.50   | not significant |
| 11226 | ZNF43        | 1.35 | 1.19E-11 | 7.66E-11 | 758.90   | not significant |
| 11227 | WDR90        | 1.35 | 2.48E-03 | 5.52E-03 | 1707.79  | not significant |
| 11228 | TP53I3       | 1.35 | 2.80E-03 | 6.16E-03 | 91.27    | not significant |
| 11229 | RPL11        | 1.35 | 1.77E-10 | 1.02E-09 | 26346.99 | not significant |
| 11230 | C5orf56      | 1.35 | 3.18E-19 | 3.86E-18 | 1458.22  | not significant |
| 11231 | LMO7         | 1.35 | 2.70E-09 | 1.37E-08 | 658.83   | not significant |
| 11232 | LOC401320    | 1.35 | 1.57E-04 | 4.37E-04 | 205.28   | not significant |
| 11233 | MIR155HG     | 1.35 | 2.21E-04 | 5.98E-04 | 174.97   | not significant |
| 11234 | SMAD1        | 1.35 | 2.97E-10 | 1.67E-09 | 640.44   | not significant |
| 11235 | LOC155060    | 1.35 | 6.53E-03 | 1.34E-02 | 335.31   | not significant |
| 11236 | RPS9         | 1.35 | 5.72E-25 | 1.02E-23 | 7952.03  | not significant |
| 11237 | MANEAL       | 1.35 | 1.51E-11 | 9.59E-11 | 795.08   | not significant |
| 11238 | LINC00324    | 1.35 | 1.05E-02 | 2.06E-02 | 50.46    | not significant |
| 11239 | ZNF682       | 1.35 | 4.07E-06 | 1.42E-05 | 308.07   | not significant |
| 11240 | SDHAP1       | 1.35 | 1.69E-04 | 4.66E-04 | 184.46   | not significant |
| 11241 | CCDC171      | 1.35 | 1.63E-05 | 5.27E-05 | 249.66   | not significant |
| 11242 | SPAG7        | 1.35 | 1.03E-14 | 8.66E-14 | 1448.01  | not significant |
| 11243 | LOC220729    | 1.35 | 6.56E-07 | 2.54E-06 | 539.17   | not significant |
| 11244 | LINC00649    | 1.35 | 5.82E-12 | 3.85E-11 | 805.81   | not significant |
| 11245 | CD96         | 1.35 | 1.00E-46 | 5.49E-45 | 8212.99  | not significant |
| 11246 | PRPSAP1      | 1.35 | 5.50E-25 | 9.86E-24 | 2816.40  | not significant |
| 11247 | CEL          | 1.35 | 3.13E-03 | 6.82E-03 | 87.72    | not significant |
| 11248 | FLT4         | 1.35 | 5.00E-18 | 5.56E-17 | 1378.77  | not significant |
| 11249 | N4BP3        | 1.35 | 4.48E-03 | 9.50E-03 | 80.43    | not significant |
| 11250 | MAFG         | 1.35 | 2.80E-24 | 4.75E-23 | 1946.95  | not significant |
| 11251 | GKAP1        | 1.35 | 7.63E-05 | 2.23E-04 | 187.95   | not significant |
| 11252 | XKR5         | 1.35 | 4.19E-04 | 1.08E-03 | 145.83   | not significant |



|       |              |      |          |          |          |                 |
|-------|--------------|------|----------|----------|----------|-----------------|
| 11253 | PKD1         | 1.35 | 5.89E-22 | 8.51E-21 | 2981.64  | not significant |
| 11254 | LAPTM4A      | 1.36 | 4.66E-18 | 5.19E-17 | 1299.49  | not significant |
| 11255 | RPS21        | 1.36 | 2.16E-33 | 6.51E-32 | 10375.52 | not significant |
| 11256 | ZNF799       | 1.36 | 4.42E-05 | 1.34E-04 | 249.64   | not significant |
| 11257 | MNS1         | 1.36 | 4.79E-03 | 1.01E-02 | 81.21    | not significant |
| 11258 | TRIM4        | 1.36 | 1.31E-17 | 1.41E-16 | 1456.51  | not significant |
| 11259 | RNF130       | 1.36 | 2.67E-22 | 3.92E-21 | 2679.42  | not significant |
| 11260 | CCNE2        | 1.36 | 2.72E-31 | 7.08E-30 | 2879.27  | not significant |
| 11261 | RPUSD4       | 1.36 | 1.38E-19 | 1.71E-18 | 1502.75  | not significant |
| 11262 | C10orf32     | 1.36 | 7.75E-13 | 5.52E-12 | 936.40   | not significant |
| 11263 | ZNF445       | 1.36 | 1.87E-23 | 2.99E-22 | 2734.99  | not significant |
| 11264 | PRORS1P      | 1.36 | 1.89E-02 | 3.49E-02 | 29.44    | not significant |
| 11265 | ZNF618       | 1.36 | 6.60E-03 | 1.35E-02 | 60.28    | not significant |
| 11266 | NAT14        | 1.36 | 2.00E-08 | 9.28E-08 | 701.56   | not significant |
| 11267 | ACTG1        | 1.36 | 1.05E-34 | 3.48E-33 | 26487.33 | not significant |
| 11268 | ARID5A       | 1.36 | 3.29E-13 | 2.41E-12 | 876.17   | not significant |
| 11269 | BSDC1        | 1.36 | 1.10E-23 | 1.79E-22 | 1953.76  | not significant |
| 11270 | LENG8        | 1.36 | 7.98E-04 | 1.94E-03 | 1369.29  | not significant |
| 11271 | RAB24        | 1.36 | 1.21E-14 | 1.01E-13 | 989.59   | not significant |
| 11272 | CCNL2        | 1.36 | 5.29E-07 | 2.07E-06 | 2901.89  | not significant |
| 11273 | PLEKHG4      | 1.36 | 4.63E-30 | 1.13E-28 | 3460.82  | not significant |
| 11274 | LOC100506713 | 1.36 | 8.39E-03 | 1.67E-02 | 52.66    | not significant |
| 11275 | ZNF850       | 1.36 | 7.17E-07 | 2.76E-06 | 419.75   | not significant |
| 11276 | SOCS6        | 1.36 | 9.89E-06 | 3.28E-05 | 288.25   | not significant |
| 11277 | HNRNPU-AS1   | 1.36 | 9.68E-03 | 1.91E-02 | 1391.16  | not significant |
| 11278 | NOL4L        | 1.36 | 9.40E-06 | 3.13E-05 | 2352.61  | not significant |
| 11279 | KMT2E-AS1    | 1.36 | 4.39E-04 | 1.12E-03 | 140.72   | not significant |
| 11280 | RGL2         | 1.36 | 3.47E-06 | 1.23E-05 | 283.52   | not significant |
| 11281 | ASAH1        | 1.36 | 4.04E-16 | 3.81E-15 | 1121.85  | not significant |
| 11282 | MCF2L2       | 1.36 | 3.15E-03 | 6.88E-03 | 81.00    | not significant |
| 11283 | ARHGAP33     | 1.36 | 2.62E-03 | 5.80E-03 | 2231.21  | not significant |
| 11284 | ZNF514       | 1.36 | 1.11E-04 | 3.15E-04 | 216.79   | not significant |
| 11285 | PDCD4-AS1    | 1.36 | 2.62E-04 | 7.00E-04 | 164.28   | not significant |
| 11286 | RNF103       | 1.36 | 5.93E-08 | 2.61E-07 | 442.97   | not significant |
| 11287 | C16orf52     | 1.36 | 2.25E-07 | 9.23E-07 | 368.41   | not significant |
| 11288 | WDR5B        | 1.36 | 8.16E-06 | 2.74E-05 | 333.96   | not significant |
| 11289 | EIF3E        | 1.36 | 1.88E-36 | 6.95E-35 | 14676.53 | not significant |
| 11290 | FAM84B       | 1.36 | 5.37E-04 | 1.35E-03 | 131.59   | not significant |
| 11291 | ICAM2        | 1.36 | 6.30E-30 | 1.52E-28 | 6135.47  | not significant |
| 11292 | BRD3         | 1.36 | 5.17E-29 | 1.18E-27 | 2658.50  | not significant |
| 11293 | SLC30A1      | 1.36 | 4.19E-11 | 2.56E-10 | 691.24   | not significant |
| 11294 | DNAL4        | 1.36 | 5.00E-08 | 2.22E-07 | 410.16   | not significant |
| 11295 | LBH          | 1.36 | 9.23E-22 | 1.32E-20 | 2350.32  | not significant |
| 11296 | ZNF230       | 1.36 | 1.32E-06 | 4.94E-06 | 321.68   | not significant |
| 11297 | NS3BP        | 1.36 | 7.30E-03 | 1.48E-02 | 65.42    | not significant |
| 11298 | SMO          | 1.36 | 6.77E-22 | 9.75E-21 | 1752.63  | not significant |
| 11299 | CNPY3        | 1.36 | 1.75E-37 | 6.89E-36 | 4213.68  | not significant |
| 11300 | RORB         | 1.36 | 1.47E-03 | 3.41E-03 | 98.65    | not significant |
| 11301 | USP49        | 1.36 | 1.11E-30 | 2.78E-29 | 4275.13  | not significant |
| 11302 | ZNF681       | 1.36 | 7.64E-14 | 5.94E-13 | 909.98   | not significant |
| 11303 | HINFP        | 1.36 | 2.04E-11 | 1.28E-10 | 653.00   | not significant |
| 11304 | TP53I13      | 1.37 | 3.55E-17 | 3.67E-16 | 1427.20  | not significant |
| 11305 | COQ10A       | 1.37 | 1.28E-08 | 6.05E-08 | 478.06   | not significant |
| 11306 | GIGYF1       | 1.37 | 1.41E-04 | 3.95E-04 | 4706.17  | not significant |
| 11307 | MRPL45       | 1.37 | 3.33E-08 | 1.51E-07 | 429.27   | not significant |
| 11308 | TM7SF2       | 1.37 | 3.69E-07 | 1.48E-06 | 330.95   | not significant |
| 11309 | TMEM106A     | 1.37 | 3.64E-08 | 1.64E-07 | 404.07   | not significant |
| 11310 | CD1B         | 1.37 | 1.99E-55 | 1.54E-53 | 7564.17  | not significant |
| 11311 | SH3BP5-AS1   | 1.37 | 7.13E-03 | 1.45E-02 | 218.93   | not significant |
| 11312 | MND1         | 1.37 | 3.15E-19 | 3.82E-18 | 1710.15  | not significant |
| 11313 | MLLT11       | 1.37 | 8.96E-22 | 1.28E-20 | 2265.54  | not significant |
| 11314 | LINC00342    | 1.37 | 1.63E-03 | 3.75E-03 | 469.16   | not significant |
| 11315 | CD2          | 1.37 | 8.60E-36 | 3.05E-34 | 5869.21  | not significant |
| 11316 | RSRP1        | 1.37 | 1.85E-14 | 1.52E-13 | 1229.82  | not significant |
| 11317 | SLC25A5      | 1.37 | 1.63E-50 | 1.04E-48 | 19411.31 | not significant |
| 11318 | MT1X         | 1.37 | 6.51E-21 | 8.82E-20 | 3124.56  | not significant |
| 11319 | NDST3        | 1.37 | 1.99E-22 | 2.97E-21 | 1684.35  | not significant |
| 11320 | ST6GAL1      | 1.37 | 1.78E-38 | 7.34E-37 | 4325.47  | not significant |
| 11321 | C14orf39     | 1.37 | 1.31E-03 | 3.07E-03 | 111.17   | not significant |
| 11322 | ZNF738       | 1.37 | 1.99E-19 | 2.45E-18 | 1782.62  | not significant |
| 11323 | C5orf42      | 1.37 | 8.10E-18 | 8.83E-17 | 1693.70  | not significant |
| 11324 | PCNXL2       | 1.37 | 2.42E-16 | 2.33E-15 | 1004.97  | not significant |
| 11325 | PMS2P4       | 1.37 | 4.16E-03 | 8.85E-03 | 71.37    | not significant |
| 11326 | NSUN5P1      | 1.37 | 1.22E-04 | 3.43E-04 | 179.83   | not significant |
| 11327 | CYLD         | 1.37 | 1.40E-16 | 1.38E-15 | 1281.40  | not significant |
| 11328 | ZNF473       | 1.37 | 2.69E-20 | 3.50E-19 | 1328.80  | not significant |
| 11329 | TAF8         | 1.37 | 1.60E-22 | 2.40E-21 | 1721.95  | not significant |
| 11330 | ZNF324B      | 1.37 | 3.68E-05 | 1.13E-04 | 225.60   | not significant |
| 11331 | RFX3         | 1.37 | 1.47E-09 | 7.64E-09 | 660.42   | not significant |
| 11332 | HSD17B7P2    | 1.37 | 2.59E-04 | 6.93E-04 | 143.25   | not significant |
| 11333 | ZNF500       | 1.37 | 2.64E-06 | 9.45E-06 | 325.74   | not significant |
| 11334 | STAG3L4      | 1.37 | 5.49E-07 | 2.14E-06 | 338.50   | not significant |
| 11335 | METTL9       | 1.37 | 2.01E-36 | 7.41E-35 | 6570.79  | not significant |
| 11336 | ANO8         | 1.37 | 3.71E-06 | 1.30E-05 | 329.52   | not significant |
| 11337 | LOC90834     | 1.37 | 3.27E-03 | 7.11E-03 | 96.00    | not significant |
| 11338 | AMFR         | 1.37 | 3.00E-33 | 8.93E-32 | 3850.01  | not significant |
| 11339 | SNTG2        | 1.37 | 2.46E-06 | 8.89E-06 | 276.09   | not significant |
| 11340 | ITGA4        | 1.37 | 2.76E-67 | 2.93E-65 | 38395.06 | not significant |

|       |              |      |          |          |          |                 |
|-------|--------------|------|----------|----------|----------|-----------------|
| 11341 | C21orf58     | 1.38 | 2.87E-16 | 2.74E-15 | 1252.53  | not significant |
| 11342 | VN1R1        | 1.38 | 1.95E-02 | 3.58E-02 | 17.64    | not significant |
| 11343 | PTK2B        | 1.38 | 3.79E-52 | 2.57E-50 | 5766.04  | not significant |
| 11344 | ZNF83        | 1.38 | 1.60E-15 | 1.44E-14 | 1538.67  | not significant |
| 11345 | BACH1        | 1.38 | 6.04E-24 | 1.00E-22 | 1764.57  | not significant |
| 11346 | E2F1         | 1.38 | 1.92E-44 | 9.97E-43 | 4578.58  | not significant |
| 11347 | ZFP3         | 1.38 | 5.47E-03 | 1.14E-02 | 61.86    | not significant |
| 11348 | NT5DC1       | 1.38 | 1.41E-11 | 8.95E-11 | 651.10   | not significant |
| 11349 | ZNF789       | 1.38 | 5.58E-06 | 1.92E-05 | 324.85   | not significant |
| 11350 | RPL35A       | 1.38 | 2.07E-31 | 5.45E-30 | 13287.96 | not significant |
| 11351 | CHTF18       | 1.38 | 9.32E-09 | 4.49E-08 | 2584.61  | not significant |
| 11352 | CENPV        | 1.38 | 3.77E-28 | 8.18E-27 | 2863.37  | not significant |
| 11353 | SUGT1P1      | 1.38 | 6.67E-03 | 1.36E-02 | 58.28    | not significant |
| 11354 | CHST14       | 1.38 | 8.10E-16 | 7.49E-15 | 923.32   | not significant |
| 11355 | ATXN7        | 1.38 | 3.10E-16 | 2.95E-15 | 1678.85  | not significant |
| 11356 | PMF1         | 1.38 | 1.16E-10 | 6.75E-10 | 549.46   | not significant |
| 11357 | SS18L1       | 1.38 | 1.70E-15 | 1.53E-14 | 1076.85  | not significant |
| 11358 | ZNF784       | 1.38 | 7.60E-04 | 1.85E-03 | 111.10   | not significant |
| 11359 | NRM          | 1.38 | 6.92E-05 | 2.04E-04 | 175.17   | not significant |
| 11360 | PABPC3       | 1.38 | 7.34E-07 | 2.82E-06 | 291.65   | not significant |
| 11361 | CSGALNACT2   | 1.38 | 8.82E-30 | 2.10E-28 | 2534.92  | not significant |
| 11362 | GCNT1        | 1.38 | 7.43E-10 | 3.98E-09 | 496.39   | not significant |
| 11363 | TTC14        | 1.38 | 3.19E-05 | 9.88E-05 | 3200.15  | not significant |
| 11364 | DPY19L3      | 1.38 | 1.69E-18 | 1.95E-17 | 1239.60  | not significant |
| 11365 | CYTH1        | 1.38 | 4.37E-61 | 3.87E-59 | 8880.71  | not significant |
| 11366 | SP140        | 1.38 | 2.11E-13 | 1.58E-12 | 711.53   | not significant |
| 11367 | SNHG12       | 1.38 | 2.45E-06 | 8.85E-06 | 340.55   | not significant |
| 11368 | TMUB2        | 1.38 | 2.30E-14 | 1.88E-13 | 895.97   | not significant |
| 11369 | EPST11       | 1.38 | 5.69E-41 | 2.59E-39 | 3501.32  | not significant |
| 11370 | PCNXL4       | 1.38 | 1.27E-43 | 6.24E-42 | 4141.73  | not significant |
| 11371 | RPS20        | 1.38 | 1.67E-11 | 1.05E-10 | 20483.35 | not significant |
| 11372 | CD48         | 1.38 | 4.38E-31 | 1.13E-29 | 2810.66  | not significant |
| 11373 | UBASH3B      | 1.38 | 1.54E-59 | 1.31E-57 | 10803.15 | not significant |
| 11374 | NHLRC3       | 1.38 | 2.35E-13 | 1.75E-12 | 969.65   | not significant |
| 11375 | BACE1-AS     | 1.38 | 1.09E-02 | 2.12E-02 | 40.48    | not significant |
| 11376 | COL18A1      | 1.38 | 6.77E-04 | 1.67E-03 | 119.97   | not significant |
| 11377 | ANKRD23      | 1.38 | 9.07E-04 | 2.19E-03 | 121.98   | not significant |
| 11378 | MKRN3        | 1.38 | 2.93E-09 | 1.48E-08 | 457.59   | not significant |
| 11379 | RNPC3        | 1.38 | 2.41E-08 | 1.11E-07 | 521.66   | not significant |
| 11380 | METTL12      | 1.38 | 2.81E-03 | 6.18E-03 | 76.16    | not significant |
| 11381 | LOC100128361 | 1.38 | 2.41E-05 | 7.58E-05 | 211.35   | not significant |
| 11382 | KIAA1107     | 1.38 | 6.07E-04 | 1.51E-03 | 124.02   | not significant |
| 11383 | ZNF783       | 1.38 | 6.58E-07 | 2.54E-06 | 384.32   | not significant |
| 11384 | SLC37A1      | 1.38 | 2.54E-11 | 1.58E-10 | 583.97   | not significant |
| 11385 | ZNF718       | 1.38 | 2.67E-03 | 5.90E-03 | 76.42    | not significant |
| 11386 | CHMP1B       | 1.38 | 1.49E-26 | 2.91E-25 | 1920.80  | not significant |
| 11387 | UBALD1       | 1.38 | 2.34E-07 | 9.56E-07 | 327.51   | not significant |
| 11388 | DHRS1        | 1.38 | 3.65E-06 | 1.28E-05 | 258.40   | not significant |
| 11389 | TMSB15A      | 1.39 | 2.47E-05 | 7.76E-05 | 195.15   | not significant |
| 11390 | MPG          | 1.39 | 1.42E-17 | 1.52E-16 | 1206.51  | not significant |
| 11391 | LRRC75A      | 1.39 | 4.12E-03 | 8.78E-03 | 65.46    | not significant |
| 11392 | NBPF1        | 1.39 | 7.53E-18 | 8.23E-17 | 1024.29  | not significant |
| 11393 | P2RX5        | 1.39 | 3.78E-37 | 1.46E-35 | 3250.92  | not significant |
| 11394 | TMEM64       | 1.39 | 5.55E-08 | 2.45E-07 | 358.25   | not significant |
| 11395 | LMO4         | 1.39 | 4.23E-05 | 1.29E-04 | 176.00   | not significant |
| 11396 | AP4M1        | 1.39 | 2.97E-10 | 1.67E-09 | 581.81   | not significant |
| 11397 | CRIP1        | 1.39 | 5.82E-10 | 3.17E-09 | 471.21   | not significant |
| 11398 | CCDC61       | 1.39 | 4.52E-08 | 2.02E-07 | 348.35   | not significant |
| 11399 | GPR161       | 1.39 | 1.05E-06 | 3.97E-06 | 293.52   | not significant |
| 11400 | FNIP1        | 1.39 | 4.14E-18 | 4.64E-17 | 1154.40  | not significant |
| 11401 | PPDF         | 1.39 | 3.18E-19 | 3.86E-18 | 1405.14  | not significant |
| 11402 | MVB12B       | 1.39 | 2.05E-17 | 2.16E-16 | 1556.19  | not significant |
| 11403 | PTCRA        | 1.39 | 5.37E-03 | 1.12E-02 | 56.12    | not significant |
| 11404 | DOPEY1       | 1.39 | 2.05E-15 | 1.83E-14 | 893.77   | not significant |
| 11405 | CDKN1B       | 1.39 | 6.09E-25 | 1.09E-23 | 1704.01  | not significant |
| 11406 | CAPS         | 1.39 | 3.09E-03 | 6.75E-03 | 74.90    | not significant |
| 11407 | TSLP         | 1.39 | 9.51E-04 | 2.28E-03 | 95.67    | not significant |
| 11408 | NR1D2        | 1.39 | 2.08E-10 | 1.19E-09 | 620.61   | not significant |
| 11409 | LOC100129550 | 1.39 | 6.91E-04 | 1.70E-03 | 107.54   | not significant |
| 11410 | PQBP1        | 1.39 | 7.58E-11 | 4.50E-10 | 520.68   | not significant |
| 11411 | FBXW4        | 1.39 | 1.43E-16 | 1.41E-15 | 1440.22  | not significant |
| 11412 | CCDC150      | 1.39 | 1.13E-07 | 4.81E-07 | 407.32   | not significant |
| 11413 | ATHL1        | 1.39 | 3.14E-05 | 9.72E-05 | 6475.29  | not significant |
| 11414 | GFER         | 1.39 | 8.22E-15 | 6.99E-14 | 920.97   | not significant |
| 11415 | CASC15       | 1.39 | 2.94E-19 | 3.58E-18 | 1223.67  | not significant |
| 11416 | SLC25A36     | 1.39 | 2.46E-35 | 8.38E-34 | 4354.87  | not significant |
| 11417 | MAST3        | 1.39 | 1.15E-12 | 8.11E-12 | 745.14   | not significant |
| 11418 | CSNK2A2      | 1.39 | 2.74E-23 | 4.34E-22 | 1789.22  | not significant |
| 11419 | ZNF497       | 1.39 | 1.19E-04 | 3.36E-04 | 153.76   | not significant |
| 11420 | RPS23        | 1.39 | 1.02E-09 | 5.39E-09 | 15741.85 | not significant |
| 11421 | SPPL2B       | 1.39 | 4.56E-18 | 5.09E-17 | 1840.64  | not significant |
| 11422 | C8orf82      | 1.39 | 7.97E-17 | 8.00E-16 | 906.83   | not significant |
| 11423 | CEP97        | 1.39 | 7.47E-20 | 9.47E-19 | 1292.48  | not significant |
| 11424 | RPS12        | 1.39 | 2.66E-40 | 1.19E-38 | 25781.43 | not significant |
| 11425 | EVI2B        | 1.39 | 7.85E-28 | 1.68E-26 | 1764.60  | not significant |
| 11426 | KIAA1656     | 1.39 | 9.42E-03 | 1.86E-02 | 44.54    | not significant |
| 11427 | TBC1D19      | 1.40 | 5.17E-09 | 2.55E-08 | 392.93   | not significant |
| 11428 | ZBTB8A       | 1.40 | 7.62E-15 | 6.51E-14 | 808.92   | not significant |

|       |              |      |          |          |          |                 |
|-------|--------------|------|----------|----------|----------|-----------------|
| 11429 | GAB1         | 1.40 | 4.05E-03 | 8.65E-03 | 63.80    | not significant |
| 11430 | TMEM9B-AS1   | 1.40 | 2.71E-03 | 5.98E-03 | 72.86    | not significant |
| 11431 | EEF1B2       | 1.40 | 3.02E-34 | 9.75E-33 | 14246.99 | not significant |
| 11432 | ZKSCAN1      | 1.40 | 6.83E-53 | 4.77E-51 | 5912.46  | not significant |
| 11433 | PHLDB3       | 1.40 | 6.33E-06 | 2.16E-05 | 241.09   | not significant |
| 11434 | CDK19        | 1.40 | 2.56E-29 | 5.94E-28 | 2185.56  | not significant |
| 11435 | PK2          | 1.40 | 1.93E-07 | 7.96E-07 | 323.94   | not significant |
| 11436 | RAD51AP1     | 1.40 | 1.99E-36 | 7.36E-35 | 2676.86  | not significant |
| 11437 | LOC729296    | 1.40 | 1.88E-03 | 4.26E-03 | 77.79    | not significant |
| 11438 | PBLD         | 1.40 | 1.15E-03 | 2.73E-03 | 97.54    | not significant |
| 11439 | FAM221A      | 1.40 | 1.33E-08 | 6.26E-08 | 377.56   | not significant |
| 11440 | PTPLA        | 1.40 | 9.06E-06 | 3.03E-05 | 223.23   | not significant |
| 11441 | KLF7         | 1.40 | 1.27E-02 | 2.44E-02 | 32.23    | not significant |
| 11442 | LINC01004    | 1.40 | 1.08E-04 | 3.06E-04 | 208.01   | not significant |
| 11443 | DLEU2L       | 1.40 | 1.56E-02 | 2.93E-02 | 24.06    | not significant |
| 11444 | DGKQ         | 1.40 | 1.18E-20 | 1.57E-19 | 1363.97  | not significant |
| 11445 | IBA57        | 1.40 | 7.73E-11 | 4.59E-10 | 531.75   | not significant |
| 11446 | RCN3         | 1.40 | 3.34E-03 | 7.25E-03 | 68.74    | not significant |
| 11447 | TRAF5        | 1.40 | 4.25E-21 | 5.84E-20 | 1996.83  | not significant |
| 11448 | HIST1H2BK    | 1.40 | 4.92E-08 | 2.19E-07 | 342.99   | not significant |
| 11449 | KLHDC2       | 1.40 | 9.02E-21 | 1.21E-19 | 1193.63  | not significant |
| 11450 | KRBA2        | 1.40 | 1.17E-03 | 2.76E-03 | 88.26    | not significant |
| 11451 | TTC31        | 1.40 | 8.12E-20 | 1.03E-18 | 1339.10  | not significant |
| 11452 | CAPN10-AS1   | 1.40 | 1.75E-03 | 3.99E-03 | 80.51    | not significant |
| 11453 | RPS29        | 1.40 | 4.77E-06 | 1.65E-05 | 8052.98  | not significant |
| 11454 | KRBA1        | 1.40 | 4.34E-13 | 3.17E-12 | 634.53   | not significant |
| 11455 | PLA2G6       | 1.40 | 3.84E-15 | 3.37E-14 | 1182.96  | not significant |
| 11456 | RPL26        | 1.40 | 6.96E-35 | 2.32E-33 | 13903.33 | not significant |
| 11457 | ZBTB42       | 1.40 | 2.03E-06 | 7.39E-06 | 295.36   | not significant |
| 11458 | VASH2        | 1.40 | 4.10E-24 | 6.88E-23 | 1423.75  | not significant |
| 11459 | OGT          | 1.40 | 1.89E-04 | 5.19E-04 | 11004.96 | not significant |
| 11460 | TUBGCP6      | 1.40 | 3.35E-06 | 1.19E-05 | 2952.35  | not significant |
| 11461 | SBK1         | 1.40 | 1.28E-27 | 2.68E-26 | 2068.17  | not significant |
| 11462 | KIAA0895L    | 1.40 | 2.01E-14 | 1.65E-13 | 1299.26  | not significant |
| 11463 | KDM5D        | 1.41 | 1.13E-36 | 4.24E-35 | 3522.51  | not significant |
| 11464 | NOP14-AS1    | 1.41 | 7.98E-06 | 2.69E-05 | 201.79   | not significant |
| 11465 | CAMK4        | 1.41 | 1.17E-25 | 2.17E-24 | 1531.08  | not significant |
| 11466 | PPAPDC2      | 1.41 | 5.28E-10 | 2.89E-09 | 456.89   | not significant |
| 11467 | TOPORS-AS1   | 1.41 | 4.35E-05 | 1.32E-04 | 176.33   | not significant |
| 11468 | FAM193B      | 1.41 | 1.39E-04 | 3.89E-04 | 2766.38  | not significant |
| 11469 | MTSS1L       | 1.41 | 2.10E-15 | 1.87E-14 | 815.74   | not significant |
| 11470 | SLC29A3      | 1.41 | 3.39E-07 | 1.36E-06 | 287.55   | not significant |
| 11471 | GSG2         | 1.41 | 1.27E-27 | 2.68E-26 | 1859.50  | not significant |
| 11472 | TRPT1        | 1.41 | 5.88E-12 | 3.88E-11 | 548.28   | not significant |
| 11473 | AGO4         | 1.41 | 5.35E-26 | 1.00E-24 | 2037.27  | not significant |
| 11474 | CNTD1        | 1.41 | 1.58E-02 | 2.96E-02 | 11.35    | not significant |
| 11475 | ZNF529       | 1.41 | 1.55E-17 | 1.65E-16 | 1149.19  | not significant |
| 11476 | TMEM80       | 1.41 | 6.89E-07 | 2.66E-06 | 299.07   | not significant |
| 11477 | LINC00883    | 1.41 | 9.57E-05 | 2.76E-04 | 151.43   | not significant |
| 11478 | SRGAP3       | 1.41 | 2.62E-04 | 6.99E-04 | 120.38   | not significant |
| 11479 | FNDC3A       | 1.41 | 1.51E-35 | 5.25E-34 | 3175.22  | not significant |
| 11480 | ZNF519       | 1.41 | 3.18E-12 | 2.15E-11 | 678.68   | not significant |
| 11481 | MDFIC        | 1.41 | 1.77E-43 | 8.69E-42 | 7070.31  | not significant |
| 11482 | LOC100132077 | 1.41 | 4.94E-03 | 1.04E-02 | 56.69    | not significant |
| 11483 | PQLC2        | 1.41 | 6.58E-05 | 1.95E-04 | 154.43   | not significant |
| 11484 | TUFT1        | 1.41 | 1.41E-02 | 2.69E-02 | 26.33    | not significant |
| 11485 | LINC01115    | 1.41 | 8.95E-04 | 2.16E-03 | 91.12    | not significant |
| 11486 | S1PR3        | 1.41 | 5.95E-15 | 5.13E-14 | 736.23   | not significant |
| 11487 | MOB2         | 1.41 | 5.40E-12 | 3.58E-11 | 541.21   | not significant |
| 11488 | LGALS9       | 1.41 | 2.72E-32 | 7.62E-31 | 2027.95  | not significant |
| 11489 | HES4         | 1.41 | 7.15E-19 | 8.41E-18 | 1062.82  | not significant |
| 11490 | HEXA         | 1.41 | 7.73E-27 | 1.54E-25 | 1804.48  | not significant |
| 11491 | NEAT1        | 1.41 | 2.40E-04 | 6.44E-04 | 4055.14  | not significant |
| 11492 | NPHP3        | 1.41 | 1.26E-03 | 2.96E-03 | 99.56    | not significant |
| 11493 | C16orf93     | 1.41 | 9.34E-04 | 2.25E-03 | 88.20    | not significant |
| 11494 | SNX14        | 1.41 | 3.84E-19 | 4.63E-18 | 1119.73  | not significant |
| 11495 | CADM4        | 1.41 | 1.83E-03 | 4.16E-03 | 77.17    | not significant |
| 11496 | SVOPL        | 1.41 | 1.38E-08 | 6.51E-08 | 448.00   | not significant |
| 11497 | ABCD4        | 1.41 | 2.61E-23 | 4.14E-22 | 1320.42  | not significant |
| 11498 | PRKAB1       | 1.41 | 4.25E-42 | 2.00E-40 | 3601.84  | not significant |
| 11499 | RPL32P3      | 1.41 | 4.47E-06 | 1.56E-05 | 247.91   | not significant |
| 11500 | GSC          | 1.41 | 9.08E-06 | 3.03E-05 | 203.97   | not significant |
| 11501 | DBN1         | 1.41 | 2.30E-38 | 9.39E-37 | 4217.25  | not significant |
| 11502 | ZSCAN26      | 1.41 | 1.98E-07 | 8.15E-07 | 301.94   | not significant |
| 11503 | FHL3         | 1.41 | 1.09E-06 | 4.12E-06 | 241.06   | not significant |
| 11504 | N4BP2L1      | 1.41 | 4.00E-14 | 3.20E-13 | 800.85   | not significant |
| 11505 | KCTD7        | 1.41 | 3.04E-20 | 3.93E-19 | 1129.39  | not significant |
| 11506 | PLEKHA8P1    | 1.41 | 1.34E-07 | 5.65E-07 | 298.02   | not significant |
| 11507 | KDSR         | 1.41 | 2.51E-24 | 4.28E-23 | 1810.16  | not significant |
| 11508 | MYB          | 1.42 | 1.10E-70 | 1.31E-68 | 18020.66 | not significant |
| 11509 | RRAGB        | 1.42 | 6.79E-06 | 2.31E-05 | 210.62   | not significant |
| 11510 | NT5M         | 1.42 | 5.24E-11 | 3.16E-10 | 565.92   | not significant |
| 11511 | STK19        | 1.42 | 2.30E-03 | 5.13E-03 | 72.81    | not significant |
| 11512 | VCAN         | 1.42 | 1.50E-04 | 4.17E-04 | 127.85   | not significant |
| 11513 | DNAJC4       | 1.42 | 8.53E-07 | 3.25E-06 | 267.40   | not significant |
| 11514 | PHF19        | 1.42 | 6.43E-40 | 2.82E-38 | 4239.88  | not significant |
| 11515 | BOLA3-AS1    | 1.42 | 1.19E-02 | 2.31E-02 | 30.33    | not significant |
| 11516 | SELL         | 1.42 | 1.16E-47 | 6.57E-46 | 14689.26 | not significant |

|       |               |      |          |          |          |                 |
|-------|---------------|------|----------|----------|----------|-----------------|
| 11517 | ERGIC3        | 1.42 | 7.35E-50 | 4.58E-48 | 4834.53  | not significant |
| 11518 | MSANTD3       | 1.42 | 2.73E-07 | 1.11E-06 | 270.61   | not significant |
| 11519 | ZNF443        | 1.42 | 1.89E-09 | 9.71E-09 | 388.94   | not significant |
| 11520 | PRIM1         | 1.42 | 6.01E-34 | 1.91E-32 | 2317.29  | not significant |
| 11521 | PHF2          | 1.42 | 7.56E-44 | 3.80E-42 | 3710.90  | not significant |
| 11522 | VILL          | 1.42 | 9.80E-12 | 6.34E-11 | 719.64   | not significant |
| 11523 | SYNC          | 1.42 | 1.46E-02 | 2.76E-02 | 22.78    | not significant |
| 11524 | RAB32         | 1.42 | 2.73E-14 | 2.21E-13 | 903.71   | not significant |
| 11525 | NREP          | 1.42 | 1.39E-55 | 1.08E-53 | 5176.15  | not significant |
| 11526 | HS1BP3        | 1.42 | 6.53E-09 | 3.19E-08 | 366.73   | not significant |
| 11527 | ATG14         | 1.42 | 7.64E-10 | 4.09E-09 | 504.11   | not significant |
| 11528 | PIGQ          | 1.42 | 9.45E-17 | 9.46E-16 | 935.12   | not significant |
| 11529 | TIFA          | 1.42 | 1.50E-21 | 2.12E-20 | 1187.94  | not significant |
| 11530 | FBXO43        | 1.42 | 3.71E-10 | 2.06E-09 | 488.94   | not significant |
| 11531 | ZNF248        | 1.42 | 2.10E-16 | 2.04E-15 | 812.97   | not significant |
| 11532 | PFDN4         | 1.42 | 8.92E-15 | 7.57E-14 | 789.58   | not significant |
| 11533 | NAP1L1        | 1.42 | 1.37E-53 | 9.75E-52 | 49414.15 | not significant |
| 11534 | KCNMB4        | 1.42 | 2.59E-08 | 1.19E-07 | 326.97   | not significant |
| 11535 | CEP57         | 1.43 | 1.20E-59 | 1.04E-57 | 4890.96  | not significant |
| 11536 | MXD3          | 1.43 | 9.25E-29 | 2.07E-27 | 1744.61  | not significant |
| 11537 | LOC100630918  | 1.43 | 1.66E-03 | 3.82E-03 | 72.41    | not significant |
| 11538 | DKFZP586I1420 | 1.43 | 5.05E-14 | 4.00E-13 | 621.39   | not significant |
| 11539 | WDR45         | 1.43 | 3.00E-07 | 1.21E-06 | 257.20   | not significant |
| 11540 | IKZF2         | 1.43 | 3.79E-53 | 2.68E-51 | 13602.88 | not significant |
| 11541 | C22orf15      | 1.43 | 7.69E-03 | 1.55E-02 | 37.38    | not significant |
| 11542 | IL12RB1       | 1.43 | 3.09E-20 | 3.99E-19 | 1067.61  | not significant |
| 11543 | PHC1          | 1.43 | 1.14E-11 | 7.36E-11 | 510.71   | not significant |
| 11544 | APCDD1        | 1.43 | 3.53E-05 | 1.09E-04 | 153.25   | not significant |
| 11545 | TUG1          | 1.43 | 8.69E-47 | 4.78E-45 | 13570.48 | not significant |
| 11546 | PRSS27        | 1.43 | 1.42E-02 | 2.69E-02 | 21.83    | not significant |
| 11547 | C1orf21       | 1.43 | 9.40E-05 | 2.71E-04 | 125.37   | not significant |
| 11548 | LINC01096     | 1.43 | 3.48E-03 | 7.54E-03 | 53.16    | not significant |
| 11549 | EIF2S3        | 1.43 | 2.07E-73 | 2.60E-71 | 8745.13  | not significant |
| 11550 | CLUHP3        | 1.43 | 2.56E-09 | 1.30E-08 | 383.60   | not significant |
| 11551 | TRIM52        | 1.43 | 2.95E-09 | 1.50E-08 | 490.87   | not significant |
| 11552 | R3HDM2        | 1.43 | 3.51E-31 | 9.06E-30 | 2716.09  | not significant |
| 11553 | EFEMP2        | 1.43 | 5.14E-03 | 1.08E-02 | 44.79    | not significant |
| 11554 | FAM228B       | 1.43 | 3.78E-03 | 8.14E-03 | 50.44    | not significant |
| 11555 | LRRRC75A-AS1  | 1.43 | 1.24E-59 | 1.06E-57 | 24033.19 | not significant |
| 11556 | TIGD1         | 1.43 | 8.28E-09 | 4.02E-08 | 390.77   | not significant |
| 11557 | BFAR          | 1.43 | 3.15E-39 | 1.34E-37 | 2648.57  | not significant |
| 11558 | EIF2A         | 1.43 | 6.49E-54 | 4.72E-52 | 4508.91  | not significant |
| 11559 | ACAD11        | 1.44 | 3.89E-03 | 8.36E-03 | 56.11    | not significant |
| 11560 | ZFPM1         | 1.44 | 1.83E-05 | 5.85E-05 | 180.28   | not significant |
| 11561 | PITPNM2       | 1.44 | 2.26E-46 | 1.23E-44 | 5223.70  | not significant |
| 11562 | ZNF251        | 1.44 | 5.67E-13 | 4.08E-12 | 658.16   | not significant |
| 11563 | ANKRD36B      | 1.44 | 5.59E-08 | 2.47E-07 | 325.40   | not significant |
| 11564 | HGSNAT        | 1.44 | 2.56E-31 | 6.69E-30 | 1716.75  | not significant |
| 11565 | ABCC5         | 1.44 | 6.85E-16 | 6.37E-15 | 869.25   | not significant |
| 11566 | BHLHE23       | 1.44 | 1.14E-02 | 2.22E-02 | 26.01    | not significant |
| 11567 | CARF          | 1.44 | 7.93E-12 | 5.18E-11 | 572.94   | not significant |
| 11568 | TFAP2C        | 1.44 | 3.42E-17 | 3.54E-16 | 820.04   | not significant |
| 11569 | RAB37         | 1.44 | 2.71E-54 | 2.00E-52 | 5539.55  | not significant |
| 11570 | KCNH2         | 1.44 | 6.04E-15 | 5.21E-14 | 733.90   | not significant |
| 11571 | CTSW          | 1.44 | 1.06E-02 | 2.08E-02 | 28.29    | not significant |
| 11572 | FAM122C       | 1.44 | 2.83E-07 | 1.14E-06 | 252.12   | not significant |
| 11573 | INSR          | 1.44 | 7.29E-17 | 7.35E-16 | 791.13   | not significant |
| 11574 | VSX1          | 1.44 | 1.24E-02 | 2.38E-02 | 24.60    | not significant |
| 11575 | ZNRF1         | 1.44 | 7.12E-54 | 5.14E-52 | 5777.71  | not significant |
| 11576 | CHPF          | 1.44 | 2.22E-03 | 4.98E-03 | 61.52    | not significant |
| 11577 | TRIQK         | 1.44 | 1.13E-11 | 7.29E-11 | 464.40   | not significant |
| 11578 | MIR4674HG     | 1.44 | 2.39E-03 | 5.33E-03 | 57.60    | not significant |
| 11579 | CCDC28A       | 1.44 | 2.24E-16 | 2.16E-15 | 798.02   | not significant |
| 11580 | EIF3L         | 1.44 | 2.55E-55 | 1.96E-53 | 16953.17 | not significant |
| 11581 | KIAA1683      | 1.44 | 1.49E-02 | 2.82E-02 | 12.47    | not significant |
| 11582 | CLIP3         | 1.44 | 5.72E-08 | 2.52E-07 | 299.13   | not significant |
| 11583 | CIZ1          | 1.44 | 1.55E-48 | 9.01E-47 | 3230.50  | not significant |
| 11584 | HESX1         | 1.44 | 8.82E-03 | 1.75E-02 | 32.43    | not significant |
| 11585 | NEU1          | 1.44 | 9.69E-07 | 3.68E-06 | 223.51   | not significant |
| 11586 | TRPV3         | 1.44 | 1.38E-02 | 2.63E-02 | 20.22    | not significant |
| 11587 | EIF4E3        | 1.44 | 1.68E-12 | 1.16E-11 | 556.14   | not significant |
| 11588 | NCKAP1        | 1.44 | 1.50E-12 | 1.04E-11 | 525.62   | not significant |
| 11589 | ZBTB17        | 1.45 | 2.48E-26 | 4.77E-25 | 1419.12  | not significant |
| 11590 | CTSO          | 1.45 | 1.38E-02 | 2.63E-02 | 19.30    | not significant |
| 11591 | C6orf132      | 1.45 | 2.72E-03 | 6.01E-03 | 61.14    | not significant |
| 11592 | E2F8          | 1.45 | 2.76E-32 | 7.69E-31 | 2025.04  | not significant |
| 11593 | GLB1L3        | 1.45 | 4.04E-03 | 8.64E-03 | 49.49    | not significant |
| 11594 | SMPD2         | 1.45 | 1.76E-09 | 9.06E-09 | 345.04   | not significant |
| 11595 | SPC24         | 1.45 | 2.92E-18 | 3.31E-17 | 815.43   | not significant |
| 11596 | SLC40A1       | 1.45 | 8.63E-35 | 2.86E-33 | 1827.45  | not significant |
| 11597 | DPY19L1       | 1.45 | 1.42E-03 | 3.31E-03 | 66.58    | not significant |
| 11598 | ZSCAN16-AS1   | 1.45 | 7.08E-09 | 3.45E-08 | 306.91   | not significant |
| 11599 | EFNB2         | 1.45 | 1.20E-07 | 5.09E-07 | 252.74   | not significant |
| 11600 | TCIRG1        | 1.45 | 5.40E-12 | 3.57E-11 | 3526.75  | not significant |
| 11601 | FAM160A2      | 1.45 | 4.49E-11 | 2.73E-10 | 565.75   | not significant |
| 11602 | STAT3         | 1.45 | 5.60E-82 | 9.25E-80 | 11282.36 | not significant |
| 11603 | SFXN5         | 1.45 | 9.83E-09 | 4.72E-08 | 322.58   | not significant |
| 11604 | FAM219B       | 1.45 | 1.46E-18 | 1.69E-17 | 1120.92  | not significant |

|       |              |      |          |          |          |                 |
|-------|--------------|------|----------|----------|----------|-----------------|
| 11605 | SYF2         | 1.45 | 4.00E-30 | 9.75E-29 | 2222.55  | not significant |
| 11606 | HIST1H2AC    | 1.45 | 9.12E-03 | 1.80E-02 | 30.22    | not significant |
| 11607 | CASP8        | 1.45 | 2.79E-32 | 7.76E-31 | 2320.81  | not significant |
| 11608 | SKIL         | 1.45 | 6.33E-10 | 3.43E-09 | 361.79   | not significant |
| 11609 | LOC728323    | 1.45 | 4.82E-03 | 1.02E-02 | 49.00    | not significant |
| 11610 | SIX5         | 1.45 | 1.96E-06 | 7.17E-06 | 199.87   | not significant |
| 11611 | TRO          | 1.46 | 1.03E-02 | 7.29E-12 | 489.46   | not significant |
| 11612 | CYFIP1       | 1.46 | 6.13E-06 | 2.10E-05 | 186.80   | not significant |
| 11613 | ZNF695       | 1.46 | 8.29E-07 | 3.17E-06 | 221.93   | not significant |
| 11614 | ZNF713       | 1.46 | 1.40E-05 | 4.56E-05 | 166.34   | not significant |
| 11615 | ZNF354C      | 1.46 | 5.88E-12 | 3.88E-11 | 438.33   | not significant |
| 11616 | TSPYL4       | 1.46 | 3.78E-44 | 1.94E-42 | 2487.31  | not significant |
| 11617 | RPL31        | 1.46 | 1.70E-15 | 1.53E-14 | 18102.94 | not significant |
| 11618 | INAFM1       | 1.46 | 2.56E-09 | 1.30E-08 | 360.86   | not significant |
| 11619 | CASP9        | 1.46 | 3.21E-06 | 1.14E-05 | 183.77   | not significant |
| 11620 | IDNK         | 1.46 | 7.49E-04 | 1.83E-03 | 77.64    | not significant |
| 11621 | PDGFA        | 1.46 | 7.38E-03 | 1.49E-02 | 33.25    | not significant |
| 11622 | GATA3        | 1.46 | 1.91E-68 | 2.08E-66 | 7440.24  | not significant |
| 11623 | EIF3F        | 1.46 | 7.24E-60 | 6.28E-58 | 5717.42  | not significant |
| 11624 | ATP5SL       | 1.46 | 9.77E-07 | 3.70E-06 | 219.18   | not significant |
| 11625 | LSM11        | 1.46 | 8.27E-15 | 7.03E-14 | 578.15   | not significant |
| 11626 | DENND2D      | 1.46 | 4.83E-75 | 6.48E-73 | 8279.84  | not significant |
| 11627 | FSTL1        | 1.46 | 6.96E-16 | 6.47E-15 | 682.22   | not significant |
| 11628 | EMID1        | 1.46 | 2.12E-23 | 3.38E-22 | 1224.88  | not significant |
| 11629 | IRS2         | 1.46 | 4.68E-19 | 5.61E-18 | 876.95   | not significant |
| 11630 | TLR5         | 1.46 | 1.59E-03 | 3.66E-03 | 65.66    | not significant |
| 11631 | LOC101929140 | 1.46 | 2.81E-03 | 6.19E-03 | 51.03    | not significant |
| 11632 | PPAPDC1B     | 1.47 | 2.35E-22 | 3.48E-21 | 1117.42  | not significant |
| 11633 | KLHL22       | 1.47 | 4.44E-15 | 3.87E-14 | 690.55   | not significant |
| 11634 | CD44         | 1.47 | 3.71E-19 | 4.48E-18 | 837.42   | not significant |
| 11635 | SLC35E2B     | 1.47 | 2.55E-47 | 1.43E-45 | 3425.34  | not significant |
| 11636 | RASSF8       | 1.47 | 8.39E-13 | 5.96E-12 | 493.34   | not significant |
| 11637 | HMX2         | 1.47 | 1.74E-03 | 3.96E-03 | 58.44    | not significant |
| 11638 | PCBP3        | 1.47 | 1.74E-18 | 2.01E-17 | 721.37   | not significant |
| 11639 | CDK5RAP3     | 1.47 | 2.01E-07 | 8.25E-07 | 6581.97  | not significant |
| 11640 | HSD11B1L     | 1.47 | 1.92E-03 | 4.36E-03 | 54.36    | not significant |
| 11641 | FRMD4A       | 1.47 | 1.27E-23 | 2.05E-22 | 1019.82  | not significant |
| 11642 | ATP5S        | 1.47 | 2.42E-10 | 1.38E-09 | 381.51   | not significant |
| 11643 | RAD51-AS1    | 1.47 | 5.45E-03 | 1.13E-02 | 41.06    | not significant |
| 11644 | LOC100128398 | 1.47 | 2.05E-05 | 6.53E-05 | 210.55   | not significant |
| 11645 | EPCAM        | 1.47 | 2.21E-03 | 4.94E-03 | 52.76    | not significant |
| 11646 | ZNF785       | 1.47 | 1.07E-09 | 5.63E-09 | 378.38   | not significant |
| 11647 | GRASP        | 1.47 | 1.97E-04 | 5.38E-04 | 95.19    | not significant |
| 11648 | C22orf39     | 1.47 | 1.21E-37 | 4.81E-36 | 2093.48  | not significant |
| 11649 | CRTAP        | 1.47 | 1.08E-51 | 7.15E-50 | 4240.37  | not significant |
| 11650 | GLUD1P3      | 1.47 | 6.31E-03 | 1.29E-02 | 133.19   | not significant |
| 11651 | PFN2         | 1.47 | 9.36E-08 | 4.01E-07 | 228.10   | not significant |
| 11652 | ZNF554       | 1.47 | 1.94E-04 | 5.30E-04 | 99.86    | not significant |
| 11653 | KIAA0141     | 1.48 | 2.54E-36 | 9.30E-35 | 1999.67  | not significant |
| 11654 | MRPL10       | 1.48 | 4.61E-32 | 1.26E-30 | 1652.62  | not significant |
| 11655 | GATS         | 1.48 | 1.88E-29 | 4.41E-28 | 1511.11  | not significant |
| 11656 | ASPRV1       | 1.48 | 1.77E-04 | 4.86E-04 | 105.09   | not significant |
| 11657 | MYO1G        | 1.48 | 1.26E-61 | 1.14E-59 | 9281.91  | not significant |
| 11658 | CCDC88B      | 1.48 | 1.16E-25 | 2.16E-24 | 1292.70  | not significant |
| 11659 | RTKN2        | 1.48 | 8.43E-29 | 1.89E-27 | 1783.82  | not significant |
| 11660 | IPO5P1       | 1.48 | 4.14E-23 | 6.46E-22 | 1152.76  | not significant |
| 11661 | MFAP2        | 1.48 | 1.35E-02 | 2.58E-02 | 13.16    | not significant |
| 11662 | 43530_6595   | 1.48 | 4.22E-16 | 3.98E-15 | 6503.23  | not significant |
| 11663 | AMDHD2       | 1.48 | 2.78E-17 | 2.90E-16 | 757.50   | not significant |
| 11664 | BRD1         | 1.48 | 5.59E-49 | 3.31E-47 | 3298.33  | not significant |
| 11665 | LOC101928736 | 1.48 | 1.60E-05 | 5.17E-05 | 138.25   | not significant |
| 11666 | RELB         | 1.48 | 4.80E-10 | 2.63E-09 | 321.32   | not significant |
| 11667 | DZANK1       | 1.48 | 1.17E-04 | 3.32E-04 | 102.52   | not significant |
| 11668 | IFT140       | 1.48 | 1.57E-12 | 1.09E-11 | 615.92   | not significant |
| 11669 | SNHG1        | 1.48 | 2.43E-13 | 1.81E-12 | 7170.17  | not significant |
| 11670 | NIFK-AS1     | 1.48 | 4.06E-12 | 2.72E-11 | 421.07   | not significant |
| 11671 | SPAG8        | 1.48 | 1.16E-02 | 2.24E-02 | 20.38    | not significant |
| 11672 | RUFY3        | 1.48 | 1.69E-49 | 1.03E-47 | 3686.72  | not significant |
| 11673 | KCNG3        | 1.48 | 8.96E-05 | 2.59E-04 | 111.35   | not significant |
| 11674 | CBX7         | 1.49 | 6.40E-08 | 2.80E-07 | 227.63   | not significant |
| 11675 | SOGA1        | 1.49 | 2.21E-26 | 4.26E-25 | 1327.77  | not significant |
| 11676 | SLC18A2      | 1.49 | 5.56E-39 | 2.34E-37 | 2186.97  | not significant |
| 11677 | CREBZF       | 1.49 | 1.85E-11 | 1.16E-10 | 3726.89  | not significant |
| 11678 | NACA2        | 1.49 | 3.68E-03 | 7.94E-03 | 40.39    | not significant |
| 11679 | MAST1        | 1.49 | 5.54E-04 | 1.39E-03 | 71.20    | not significant |
| 11680 | RASA4CP      | 1.49 | 1.26E-07 | 5.31E-07 | 241.12   | not significant |
| 11681 | TP53INP1     | 1.49 | 4.40E-30 | 1.07E-28 | 1324.40  | not significant |
| 11682 | MIEF2        | 1.49 | 1.05E-10 | 6.16E-10 | 362.18   | not significant |
| 11683 | RTCA         | 1.49 | 1.68E-36 | 6.24E-35 | 1665.12  | not significant |
| 11684 | DDX11-AS1    | 1.49 | 6.58E-03 | 1.34E-02 | 31.95    | not significant |
| 11685 | PPIEL        | 1.49 | 1.09E-03 | 2.58E-03 | 257.18   | not significant |
| 11686 | IL15         | 1.49 | 1.41E-08 | 6.61E-08 | 255.18   | not significant |
| 11687 | GPRASP1      | 1.49 | 3.46E-18 | 3.91E-17 | 806.12   | not significant |
| 11688 | PMPCB        | 1.49 | 5.13E-56 | 4.09E-54 | 4053.04  | not significant |
| 11689 | VMAC         | 1.49 | 1.88E-05 | 6.02E-05 | 134.81   | not significant |
| 11690 | ETV6         | 1.49 | 3.66E-41 | 1.69E-39 | 2303.01  | not significant |
| 11691 | IFFO1        | 1.49 | 4.48E-13 | 3.26E-12 | 648.80   | not significant |
| 11692 | LIN7B        | 1.49 | 5.62E-04 | 1.41E-03 | 80.03    | not significant |

|       |              |      |          |          |           |                 |
|-------|--------------|------|----------|----------|-----------|-----------------|
| 11693 | GS1-24F4.2   | 1.49 | 4.29E-05 | 1.30E-04 | 117.14    | not significant |
| 11694 | CUL7         | 1.49 | 7.10E-25 | 1.25E-23 | 1187.10   | not significant |
| 11695 | MIR646HG     | 1.49 | 8.07E-21 | 1.09E-19 | 803.16    | not significant |
| 11696 | C20orf203    | 1.49 | 2.18E-03 | 4.89E-03 | 49.24     | not significant |
| 11697 | RNF122       | 1.49 | 1.57E-11 | 9.91E-11 | 371.00    | not significant |
| 11698 | ZFHX2        | 1.49 | 4.48E-05 | 1.36E-04 | 116.37    | not significant |
| 11699 | SCRN2        | 1.49 | 2.13E-16 | 2.07E-15 | 626.74    | not significant |
| 11700 | C17orf70     | 1.49 | 2.80E-44 | 1.44E-42 | 2203.70   | not significant |
| 11701 | CCNB1IP1     | 1.49 | 9.21E-44 | 4.61E-42 | 2515.09   | not significant |
| 11702 | SEPSECS-AS1  | 1.50 | 1.56E-03 | 3.61E-03 | 53.48     | not significant |
| 11703 | ERIC6-AS1    | 1.50 | 2.63E-03 | 5.82E-03 | 45.28     | not significant |
| 11704 | OSBPL7       | 1.50 | 5.18E-14 | 4.09E-13 | 677.19    | not significant |
| 11705 | ZSWIM8       | 1.50 | 4.03E-11 | 2.46E-10 | 2576.56   | not significant |
| 11706 | SDK2         | 1.50 | 8.70E-05 | 2.52E-04 | 99.99     | not significant |
| 11707 | HAGHL        | 1.50 | 6.50E-03 | 1.33E-02 | 30.51     | not significant |
| 11708 | WARS2        | 1.50 | 3.81E-19 | 4.59E-18 | 744.33    | not significant |
| 11709 | HSPA8        | 1.50 | 3.35E-68 | 3.59E-66 | 135890.00 | not significant |
| 11710 | OFD1         | 1.50 | 3.59E-20 | 4.62E-19 | 1111.49   | not significant |
| 11711 | MRPL45P2     | 1.50 | 2.26E-03 | 5.06E-03 | 49.21     | not significant |
| 11712 | EIF4A2       | 1.50 | 2.17E-64 | 2.18E-62 | 11824.36  | not significant |
| 11713 | DDRKG1       | 1.50 | 7.73E-30 | 1.85E-28 | 1772.50   | not significant |
| 11714 | NFKBIL1      | 1.50 | 2.09E-04 | 5.68E-04 | 88.44     | not significant |
| 11715 | PLEKHG2      | 1.50 | 3.74E-12 | 2.51E-11 | 3187.50   | not significant |
| 11716 | PDCD4        | 1.50 | 6.08E-43 | 2.93E-41 | 2254.61   | not significant |
| 11717 | ZSCAN2       | 1.50 | 2.95E-17 | 3.06E-16 | 607.54    | Increased       |
| 11718 | LOC100507419 | 1.50 | 5.06E-09 | 2.50E-08 | 258.42    | Increased       |
| 11719 | LOC101927599 | 1.50 | 3.09E-05 | 9.58E-05 | 120.92    | Increased       |
| 11720 | SDE2         | 1.50 | 2.89E-39 | 1.23E-37 | 2022.62   | Increased       |
| 11721 | RBM7         | 1.50 | 9.52E-28 | 2.02E-26 | 1132.54   | Increased       |
| 11722 | ZNF85        | 1.50 | 1.53E-03 | 3.54E-03 | 52.47     | Increased       |
| 11723 | IP6K2        | 1.50 | 3.10E-40 | 1.37E-38 | 3133.16   | Increased       |
| 11724 | FLJ32255     | 1.50 | 9.99E-21 | 1.33E-19 | 974.25    | Increased       |
| 11725 | DUSP1        | 1.50 | 4.04E-17 | 4.16E-16 | 592.57    | Increased       |
| 11726 | LRRN1        | 1.50 | 2.29E-03 | 5.11E-03 | 46.55     | Increased       |
| 11727 | C16orf54     | 1.51 | 1.01E-31 | 2.71E-30 | 1596.40   | Increased       |
| 11728 | THG1L        | 1.51 | 2.76E-12 | 1.88E-11 | 400.96    | Increased       |
| 11729 | RTP4         | 1.51 | 7.86E-11 | 4.66E-10 | 325.15    | Increased       |
| 11730 | NINL         | 1.51 | 3.31E-48 | 1.91E-46 | 2949.17   | Increased       |
| 11731 | ZFP2         | 1.51 | 2.93E-03 | 6.42E-03 | 46.88     | Increased       |
| 11732 | BRWD1        | 1.51 | 2.12E-45 | 1.13E-43 | 2687.00   | Increased       |
| 11733 | PMM1         | 1.51 | 1.81E-20 | 2.38E-19 | 818.62    | Increased       |
| 11734 | ARSA         | 1.51 | 1.03E-11 | 6.64E-11 | 483.38    | Increased       |
| 11735 | CLGN7        | 1.51 | 1.07E-45 | 5.70E-44 | 2252.40   | Increased       |
| 11736 | FAM214A      | 1.51 | 6.87E-17 | 6.94E-16 | 556.13    | Increased       |
| 11737 | ZNF250       | 1.51 | 4.07E-11 | 2.48E-10 | 328.17    | Increased       |
| 11738 | ARIH2OS      | 1.51 | 5.62E-04 | 1.41E-03 | 64.83     | Increased       |
| 11739 | LOC101927815 | 1.52 | 1.76E-05 | 5.65E-05 | 127.29    | Increased       |
| 11740 | NME3         | 1.52 | 6.28E-07 | 2.43E-06 | 188.09    | Increased       |
| 11741 | SHANK3       | 1.52 | 2.89E-11 | 1.78E-10 | 354.23    | Increased       |
| 11742 | RFNG         | 1.52 | 4.52E-24 | 7.56E-23 | 1208.55   | Increased       |
| 11743 | C17orf53     | 1.52 | 2.10E-18 | 2.40E-17 | 625.90    | Increased       |
| 11744 | TMEM159      | 1.52 | 3.79E-14 | 3.03E-13 | 462.30    | Increased       |
| 11745 | LOC101927204 | 1.52 | 4.70E-14 | 3.73E-13 | 450.81    | Increased       |
| 11746 | HERC2P2      | 1.52 | 1.57E-14 | 1.30E-13 | 532.03    | Increased       |
| 11747 | PTPRN2       | 1.52 | 1.64E-28 | 3.62E-27 | 1060.86   | Increased       |
| 11748 | CEP68        | 1.52 | 7.35E-25 | 1.29E-23 | 911.39    | Increased       |
| 11749 | RPL39        | 1.52 | 1.66E-14 | 1.37E-13 | 616.98    | Increased       |
| 11750 | LINC00493    | 1.52 | 9.14E-30 | 2.18E-28 | 1293.02   | Increased       |
| 11751 | OGFOD3       | 1.52 | 3.93E-33 | 1.16E-31 | 1336.69   | Increased       |
| 11752 | KIAA1549     | 1.52 | 1.13E-09 | 5.95E-09 | 314.33    | Increased       |
| 11753 | CD244        | 1.52 | 1.60E-47 | 9.02E-46 | 2306.47   | Increased       |
| 11754 | STAT5B       | 1.52 | 4.32E-98 | 1.06E-95 | 10904.51  | Increased       |
| 11755 | CROCCP3      | 1.52 | 5.12E-05 | 1.54E-04 | 134.50    | Increased       |
| 11756 | DPY19L2P2    | 1.52 | 2.34E-24 | 3.99E-23 | 968.29    | Increased       |
| 11757 | BRI3         | 1.52 | 2.75E-23 | 4.35E-22 | 984.12    | Increased       |
| 11758 | TIMP2        | 1.52 | 1.94E-11 | 1.22E-10 | 347.44    | Increased       |
| 11759 | CLIP4        | 1.52 | 9.97E-25 | 1.74E-23 | 1059.40   | Increased       |
| 11760 | DLG3         | 1.52 | 5.29E-31 | 1.35E-29 | 1395.32   | Increased       |
| 11761 | PDE3B        | 1.52 | 1.56E-04 | 4.34E-04 | 85.53     | Increased       |
| 11762 | LOC100506123 | 1.53 | 1.17E-02 | 2.27E-02 | 43.87     | Increased       |
| 11763 | COL6A3       | 1.53 | 3.21E-03 | 6.98E-03 | 37.93     | Increased       |
| 11764 | ST3GAL1      | 1.53 | 7.13E-56 | 5.62E-54 | 2482.14   | Increased       |
| 11765 | ZNF418       | 1.53 | 6.15E-12 | 4.05E-11 | 347.87    | Increased       |
| 11766 | C1orf228     | 1.53 | 8.36E-56 | 6.55E-54 | 4101.44   | Increased       |
| 11767 | C1orf213     | 1.53 | 2.25E-04 | 6.08E-04 | 74.39     | Increased       |
| 11768 | STAR9        | 1.53 | 1.04E-14 | 8.74E-14 | 568.52    | Increased       |
| 11769 | CAMK2N2      | 1.53 | 5.66E-04 | 1.42E-03 | 66.12     | Increased       |
| 11770 | SLC25A5-AS1  | 1.53 | 4.59E-04 | 1.17E-03 | 77.74     | Increased       |
| 11771 | PARP6        | 1.53 | 1.36E-08 | 6.39E-08 | 1161.54   | Increased       |
| 11772 | LINC00663    | 1.53 | 1.42E-03 | 3.30E-03 | 49.77     | Increased       |
| 11773 | GRAMD1A      | 1.53 | 3.68E-48 | 2.11E-46 | 3047.21   | Increased       |
| 11774 | C19orf48     | 1.54 | 7.93E-73 | 9.79E-71 | 4831.93   | Increased       |
| 11775 | FAM66C       | 1.54 | 5.97E-03 | 1.23E-02 | 26.32     | Increased       |
| 11776 | ZNF711       | 1.54 | 6.89E-47 | 3.83E-45 | 2876.85   | Increased       |
| 11777 | S1PR4        | 1.54 | 3.08E-10 | 1.73E-09 | 1702.22   | Increased       |
| 11778 | TSGA10       | 1.54 | 1.14E-04 | 3.22E-04 | 82.58     | Increased       |
| 11779 | LOC400863    | 1.54 | 5.68E-04 | 1.42E-03 | 63.81     | Increased       |
| 11780 | RPL34        | 1.54 | 8.06E-55 | 6.04E-53 | 10550.40  | Increased       |

|       |              |      |           |           |          |           |
|-------|--------------|------|-----------|-----------|----------|-----------|
| 11781 | ACVR2B       | 1.54 | 6.70E-37  | 2.54E-35  | 1772.22  | Increased |
| 11782 | CAPN3        | 1.54 | 9.45E-04  | 2.27E-03  | 54.60    | Increased |
| 11783 | ZNF10        | 1.54 | 1.93E-23  | 3.08E-22  | 754.11   | Increased |
| 11784 | KIAA0355     | 1.54 | 5.28E-16  | 4.94E-15  | 469.69   | Increased |
| 11785 | ADCK3        | 1.54 | 1.25E-25  | 2.32E-24  | 863.05   | Increased |
| 11786 | EGFL7        | 1.54 | 1.14E-02  | 2.22E-02  | 13.16    | Increased |
| 11787 | IMPDH2       | 1.54 | 2.87E-87  | 5.49E-85  | 12127.26 | Increased |
| 11788 | MICB         | 1.54 | 2.70E-09  | 1.37E-08  | 253.03   | Increased |
| 11789 | RASGEF1B     | 1.55 | 3.03E-10  | 1.70E-09  | 274.28   | Increased |
| 11790 | ORC1         | 1.55 | 1.46E-61  | 1.31E-59  | 4116.17  | Increased |
| 11791 | CFTR         | 1.55 | 2.36E-79  | 3.66E-77  | 12338.94 | Increased |
| 11792 | LOC101927181 | 1.55 | 7.50E-13  | 5.35E-12  | 389.85   | Increased |
| 11793 | LINC01089    | 1.55 | 2.99E-05  | 9.29E-05  | 729.59   | Increased |
| 11794 | ACSF3        | 1.55 | 6.44E-64  | 6.40E-62  | 3298.89  | Increased |
| 11795 | LINC00921    | 1.55 | 2.38E-03  | 5.31E-03  | 38.87    | Increased |
| 11796 | GPR113       | 1.55 | 4.90E-10  | 2.69E-09  | 271.24   | Increased |
| 11797 | APOBR        | 1.55 | 4.51E-21  | 6.19E-20  | 728.14   | Increased |
| 11798 | ZNF33B       | 1.55 | 1.39E-26  | 2.73E-25  | 1090.67  | Increased |
| 11799 | GPC2         | 1.55 | 5.50E-18  | 6.07E-17  | 580.08   | Increased |
| 11800 | PPP1R3E      | 1.55 | 8.35E-16  | 7.72E-15  | 546.15   | Increased |
| 11801 | LOC730183    | 1.55 | 8.04E-03  | 1.61E-02  | 21.58    | Increased |
| 11802 | ZNF135       | 1.55 | 4.79E-04  | 1.22E-03  | 59.08    | Increased |
| 11803 | CPNE7        | 1.55 | 1.73E-23  | 2.78E-22  | 736.04   | Increased |
| 11804 | MYO15B       | 1.56 | 3.24E-03  | 7.05E-03  | 34.17    | Increased |
| 11805 | FAM210B      | 1.56 | 9.93E-09  | 4.77E-08  | 232.41   | Increased |
| 11806 | SESTD1       | 1.56 | 9.13E-24  | 1.50E-22  | 847.41   | Increased |
| 11807 | FAM227A      | 1.56 | 9.58E-04  | 2.30E-03  | 59.54    | Increased |
| 11808 | PAQR8        | 1.56 | 2.42E-30  | 5.95E-29  | 1233.74  | Increased |
| 11809 | DCHS1        | 1.56 | 8.27E-42  | 3.87E-40  | 2345.41  | Increased |
| 11810 | COL6A4P1     | 1.56 | 1.28E-03  | 3.00E-03  | 46.03    | Increased |
| 11811 | ZNF93        | 1.56 | 1.76E-28  | 3.87E-27  | 1041.78  | Increased |
| 11812 | TLE4         | 1.56 | 9.54E-12  | 6.17E-11  | 315.88   | Increased |
| 11813 | GOLGA8A      | 1.56 | 1.01E-04  | 2.91E-04  | 857.96   | Increased |
| 11814 | BRSK1        | 1.56 | 9.56E-08  | 4.09E-07  | 182.23   | Increased |
| 11815 | PCBP1-AS1    | 1.56 | 2.64E-13  | 1.96E-12  | 359.24   | Increased |
| 11816 | SH2D3C       | 1.56 | 5.75E-41  | 2.61E-39  | 1471.47  | Increased |
| 11817 | KIAA0101     | 1.56 | 6.07E-53  | 4.26E-51  | 5181.29  | Increased |
| 11818 | TK2          | 1.57 | 8.05E-11  | 4.76E-10  | 369.07   | Increased |
| 11819 | BACH2        | 1.57 | 1.25E-17  | 1.35E-16  | 533.51   | Increased |
| 11820 | ZNF345       | 1.57 | 5.44E-10  | 2.97E-09  | 243.05   | Increased |
| 11821 | ATG9B        | 1.57 | 2.09E-04  | 5.67E-04  | 76.15    | Increased |
| 11822 | CTSS         | 1.57 | 5.36E-27  | 1.08E-25  | 1033.83  | Increased |
| 11823 | CCNE1        | 1.57 | 1.32E-18  | 1.54E-17  | 527.35   | Increased |
| 11824 | TENM1        | 1.57 | 8.90E-31  | 2.25E-29  | 1008.24  | Increased |
| 11825 | ZNF154       | 1.57 | 1.31E-25  | 2.41E-24  | 1165.37  | Increased |
| 11826 | BEND5        | 1.57 | 6.73E-13  | 4.82E-12  | 365.68   | Increased |
| 11827 | HEPACAM      | 1.57 | 1.15E-03  | 2.72E-03  | 44.57    | Increased |
| 11828 | FAM19A2      | 1.57 | 1.06E-11  | 6.87E-11  | 293.18   | Increased |
| 11829 | GBA2         | 1.57 | 5.17E-26  | 9.70E-25  | 819.23   | Increased |
| 11830 | RASSF8-AS1   | 1.57 | 5.05E-03  | 1.06E-02  | 28.14    | Increased |
| 11831 | KIAA1147     | 1.57 | 2.09E-04  | 5.67E-04  | 67.68    | Increased |
| 11832 | LOC646719    | 1.58 | 4.78E-07  | 1.88E-06  | 884.76   | Increased |
| 11833 | USP51        | 1.58 | 3.51E-10  | 1.95E-09  | 265.38   | Increased |
| 11834 | TMSB4Y       | 1.58 | 8.36E-07  | 3.19E-06  | 135.83   | Increased |
| 11835 | CRAMP1L      | 1.58 | 3.10E-42  | 1.47E-40  | 1865.72  | Increased |
| 11836 | GAB2         | 1.58 | 3.96E-145 | 3.02E-142 | 41937.35 | Increased |
| 11837 | RBMX2        | 1.58 | 8.61E-42  | 4.01E-40  | 1551.45  | Increased |
| 11838 | QPRT         | 1.58 | 9.32E-44  | 4.65E-42  | 1899.61  | Increased |
| 11839 | TMEM18       | 1.58 | 9.60E-50  | 5.89E-48  | 2189.00  | Increased |
| 11840 | CNIH2        | 1.58 | 8.19E-06  | 2.75E-05  | 107.93   | Increased |
| 11841 | LOC100506688 | 1.58 | 1.23E-36  | 4.60E-35  | 1219.30  | Increased |
| 11842 | LOC728752    | 1.58 | 3.15E-06  | 1.12E-05  | 119.28   | Increased |
| 11843 | SHISA2       | 1.58 | 3.06E-119 | 1.39E-116 | 10032.83 | Increased |
| 11844 | ZDHHC24      | 1.58 | 6.68E-17  | 6.77E-16  | 617.57   | Increased |
| 11845 | TGIF1        | 1.58 | 6.04E-11  | 3.62E-10  | 272.38   | Increased |
| 11846 | TMEM256      | 1.58 | 9.58E-17  | 9.58E-16  | 472.39   | Increased |
| 11847 | PAN3-AS1     | 1.59 | 7.35E-05  | 2.15E-04  | 89.58    | Increased |
| 11848 | SCAND2P      | 1.59 | 3.45E-07  | 1.38E-06  | 152.86   | Increased |
| 11849 | BCORP1       | 1.59 | 1.40E-13  | 1.06E-12  | 451.16   | Increased |
| 11850 | FAM229A      | 1.59 | 2.27E-04  | 6.14E-04  | 63.59    | Increased |
| 11851 | LOC102723927 | 1.59 | 3.58E-06  | 1.26E-05  | 163.19   | Increased |
| 11852 | SATB1-AS1    | 1.59 | 2.95E-04  | 7.78E-04  | 61.64    | Increased |
| 11853 | CBFA2T3      | 1.59 | 3.92E-109 | 1.37E-106 | 9553.71  | Increased |
| 11854 | KANSL1L      | 1.59 | 2.70E-10  | 1.53E-09  | 249.78   | Increased |
| 11855 | CD28         | 1.59 | 2.53E-98  | 6.31E-96  | 9745.66  | Increased |
| 11856 | NSG1         | 1.60 | 5.51E-03  | 1.14E-02  | 22.70    | Increased |
| 11857 | HDAC7        | 1.60 | 3.80E-103 | 1.03E-100 | 7577.58  | Increased |
| 11858 | C12orf57     | 1.60 | 5.18E-14  | 4.10E-13  | 378.63   | Increased |
| 11859 | ZFP14        | 1.60 | 9.17E-20  | 1.16E-18  | 571.43   | Increased |
| 11860 | UBA7         | 1.60 | 1.28E-41  | 5.94E-40  | 2538.46  | Increased |
| 11861 | DNAJC1       | 1.60 | 2.07E-26  | 3.99E-25  | 1058.22  | Increased |
| 11862 | LOC101929374 | 1.60 | 1.21E-04  | 3.42E-04  | 72.82    | Increased |
| 11863 | LOC100132078 | 1.60 | 6.82E-03  | 1.39E-02  | 19.15    | Increased |
| 11864 | AHSA2        | 1.60 | 7.02E-05  | 2.06E-04  | 2486.52  | Increased |
| 11865 | HDAC5        | 1.60 | 4.65E-24  | 7.76E-23  | 690.90   | Increased |
| 11866 | PGBD2        | 1.60 | 1.95E-07  | 8.04E-07  | 168.48   | Increased |
| 11867 | NEK10        | 1.60 | 1.02E-03  | 2.43E-03  | 43.97    | Increased |
| 11868 | KCNK1        | 1.61 | 9.78E-64  | 9.63E-62  | 2363.73  | Increased |

|       |              |      |           |           |          |           |
|-------|--------------|------|-----------|-----------|----------|-----------|
| 11869 | FAM175A      | 1.61 | 3.45E-23  | 5.43E-22  | 651.12   | Increased |
| 11870 | KIF27        | 1.61 | 3.86E-08  | 1.73E-07  | 170.17   | Increased |
| 11871 | GAREML       | 1.61 | 4.63E-13  | 3.36E-12  | 311.55   | Increased |
| 11872 | LRRC24       | 1.61 | 1.13E-04  | 3.22E-04  | 73.80    | Increased |
| 11873 | PRR5         | 1.61 | 2.89E-16  | 2.75E-15  | 429.22   | Increased |
| 11874 | LOC100131564 | 1.61 | 1.10E-05  | 3.64E-05  | 486.68   | Increased |
| 11875 | ATP13A4      | 1.61 | 1.27E-03  | 2.99E-03  | 38.76    | Increased |
| 11876 | COL9A2       | 1.61 | 6.07E-05  | 1.81E-04  | 77.04    | Increased |
| 11877 | C1orf85      | 1.61 | 3.29E-23  | 5.19E-22  | 733.43   | Increased |
| 11878 | PIGZ         | 1.61 | 6.25E-06  | 2.13E-05  | 100.10   | Increased |
| 11879 | SLC12A6      | 1.62 | 1.89E-84  | 3.35E-82  | 4310.46  | Increased |
| 11880 | ZNF827       | 1.62 | 1.05E-07  | 4.46E-07  | 158.32   | Increased |
| 11881 | PABPC1L      | 1.62 | 6.30E-05  | 1.87E-04  | 1227.71  | Increased |
| 11882 | ZFAS1        | 1.62 | 5.81E-91  | 1.22E-88  | 4490.09  | Increased |
| 11883 | CMTM1        | 1.62 | 2.26E-11  | 1.41E-10  | 269.26   | Increased |
| 11884 | BAI2         | 1.62 | 4.80E-40  | 2.12E-38  | 1367.34  | Increased |
| 11885 | LOC153684    | 1.63 | 1.42E-06  | 5.28E-06  | 127.82   | Increased |
| 11886 | FOXD2-AS1    | 1.63 | 2.48E-20  | 3.24E-19  | 527.27   | Increased |
| 11887 | LRRC56       | 1.63 | 1.76E-04  | 4.85E-04  | 61.08    | Increased |
| 11888 | UBXN1        | 1.63 | 2.85E-58  | 2.35E-56  | 2949.02  | Increased |
| 11889 | LIMD2        | 1.63 | 3.52E-103 | 9.76E-101 | 4533.04  | Increased |
| 11890 | LINC00664    | 1.63 | 1.49E-11  | 9.45E-11  | 241.52   | Increased |
| 11891 | PDE10A       | 1.64 | 1.84E-04  | 5.05E-04  | 58.55    | Increased |
| 11892 | TNFAIP3      | 1.64 | 8.11E-66  | 8.25E-64  | 2686.36  | Increased |
| 11893 | IRF7         | 1.64 | 1.41E-10  | 8.15E-10  | 232.85   | Increased |
| 11894 | ZNF792       | 1.64 | 1.86E-16  | 1.81E-15  | 397.13   | Increased |
| 11895 | FAM173A      | 1.64 | 3.88E-07  | 1.55E-06  | 127.09   | Increased |
| 11896 | IVNS1ABP     | 1.64 | 8.14E-106 | 2.49E-103 | 5869.32  | Increased |
| 11897 | HAUS4        | 1.64 | 1.80E-42  | 8.59E-41  | 1650.13  | Increased |
| 11898 | PTGIS        | 1.64 | 1.37E-26  | 2.70E-25  | 710.11   | Increased |
| 11899 | ZNF322       | 1.64 | 3.77E-04  | 9.77E-04  | 50.34    | Increased |
| 11900 | L3MBTL1      | 1.65 | 6.39E-09  | 3.12E-08  | 192.01   | Increased |
| 11901 | GPCPD1       | 1.65 | 2.81E-37  | 1.09E-35  | 1189.46  | Increased |
| 11902 | SOX4         | 1.65 | 9.88E-113 | 4.16E-110 | 21521.62 | Increased |
| 11903 | TXK          | 1.65 | 2.14E-05  | 6.80E-05  | 92.31    | Increased |
| 11904 | BTG1         | 1.65 | 1.16E-77  | 1.69E-75  | 6024.85  | Increased |
| 11905 | ZNF446       | 1.65 | 8.61E-14  | 6.66E-13  | 351.99   | Increased |
| 11906 | RNF139-AS1   | 1.65 | 4.86E-04  | 1.24E-03  | 53.90    | Increased |
| 11907 | LINC01355    | 1.65 | 6.83E-07  | 2.64E-06  | 148.43   | Increased |
| 11908 | LOC100288152 | 1.65 | 2.15E-05  | 6.81E-05  | 80.83    | Increased |
| 11909 | MICAL1       | 1.66 | 9.91E-14  | 7.64E-13  | 2058.93  | Increased |
| 11910 | CYP2E1       | 1.66 | 1.06E-04  | 3.01E-04  | 67.89    | Increased |
| 11911 | LRRC37B      | 1.66 | 1.31E-32  | 3.75E-31  | 880.33   | Increased |
| 11912 | PCED1A       | 1.66 | 3.42E-35  | 1.15E-33  | 1298.44  | Increased |
| 11913 | FCGRT        | 1.66 | 4.10E-32  | 1.13E-30  | 1048.66  | Increased |
| 11914 | EPM2AIP1     | 1.66 | 2.64E-11  | 1.63E-10  | 2537.14  | Increased |
| 11915 | CKB          | 1.67 | 7.02E-10  | 3.78E-09  | 208.28   | Increased |
| 11916 | CALCOCO1     | 1.67 | 4.20E-29  | 9.64E-28  | 708.26   | Increased |
| 11917 | GAS5         | 1.67 | 1.74E-80  | 2.83E-78  | 3766.08  | Increased |
| 11918 | DRAXIN       | 1.67 | 1.23E-17  | 1.33E-16  | 400.32   | Increased |
| 11919 | CDKN2B       | 1.67 | 7.37E-04  | 1.80E-03  | 38.62    | Increased |
| 11920 | GLTSCR2      | 1.67 | 1.72E-77  | 2.45E-75  | 15723.05 | Increased |
| 11921 | HLA-E        | 1.67 | 1.30E-56  | 1.04E-54  | 2059.48  | Increased |
| 11922 | YPEL5        | 1.67 | 3.41E-36  | 1.24E-34  | 903.15   | Increased |
| 11923 | MAPK11       | 1.67 | 1.46E-12  | 1.02E-11  | 258.37   | Increased |
| 11924 | FAM161B      | 1.67 | 5.26E-11  | 3.17E-10  | 212.40   | Increased |
| 11925 | SPSB3        | 1.67 | 5.47E-32  | 1.49E-30  | 1006.97  | Increased |
| 11926 | FBXL19-AS1   | 1.67 | 5.45E-08  | 2.41E-07  | 160.31   | Increased |
| 11927 | RASIP1       | 1.67 | 7.96E-04  | 1.93E-03  | 41.23    | Increased |
| 11928 | MANEA-AS1    | 1.68 | 6.55E-04  | 1.62E-03  | 48.68    | Increased |
| 11929 | RFX3-AS1     | 1.68 | 3.50E-10  | 1.95E-09  | 189.73   | Increased |
| 11930 | MYO18B       | 1.68 | 1.49E-72  | 1.82E-70  | 18879.47 | Increased |
| 11931 | C18orf32     | 1.68 | 2.75E-03  | 6.07E-03  | 27.18    | Increased |
| 11932 | NOG          | 1.68 | 6.83E-03  | 1.39E-02  | 14.92    | Increased |
| 11933 | LPAR1        | 1.68 | 1.30E-03  | 3.05E-03  | 33.60    | Increased |
| 11934 | CREB3L3      | 1.68 | 2.92E-14  | 2.36E-13  | 328.58   | Increased |
| 11935 | FLJ10038     | 1.68 | 1.93E-17  | 2.04E-16  | 384.05   | Increased |
| 11936 | PDCD1        | 1.68 | 2.89E-05  | 9.00E-05  | 71.42    | Increased |
| 11937 | ZNF491       | 1.68 | 3.50E-06  | 1.24E-05  | 124.31   | Increased |
| 11938 | PICK1        | 1.68 | 3.22E-14  | 2.60E-13  | 291.26   | Increased |
| 11939 | ANKRD36      | 1.69 | 4.30E-05  | 1.31E-04  | 425.02   | Increased |
| 11940 | MANBA        | 1.69 | 7.03E-35  | 2.34E-33  | 872.86   | Increased |
| 11941 | ADAMTS7P1    | 1.69 | 7.42E-03  | 1.50E-02  | 13.66    | Increased |
| 11942 | MT1G         | 1.69 | 8.53E-23  | 1.30E-21  | 4019.65  | Increased |
| 11943 | LOC100499489 | 1.69 | 2.10E-06  | 7.62E-06  | 94.78    | Increased |
| 11944 | TXLNB        | 1.69 | 2.20E-08  | 1.02E-07  | 141.93   | Increased |
| 11945 | ZBTB26       | 1.69 | 2.51E-18  | 2.85E-17  | 412.72   | Increased |
| 11946 | USP30-AS1    | 1.70 | 1.52E-07  | 6.36E-07  | 125.50   | Increased |
| 11947 | C2orf48      | 1.70 | 8.99E-13  | 6.38E-12  | 257.40   | Increased |
| 11948 | LINC00634    | 1.70 | 1.80E-04  | 4.94E-04  | 54.86    | Increased |
| 11949 | SLC25A29     | 1.70 | 4.48E-83  | 7.82E-81  | 2815.96  | Increased |
| 11950 | STAM         | 1.70 | 1.06E-35  | 3.71E-34  | 829.90   | Increased |
| 11951 | IZUMO1       | 1.70 | 5.63E-03  | 1.17E-02  | 16.17    | Increased |
| 11952 | ZNF821       | 1.70 | 3.16E-06  | 1.12E-05  | 94.22    | Increased |
| 11953 | TSPY26P      | 1.70 | 6.26E-08  | 2.74E-07  | 123.83   | Increased |
| 11954 | PNRC1        | 1.70 | 3.89E-20  | 5.00E-19  | 412.91   | Increased |
| 11955 | MAMSTR       | 1.70 | 2.91E-03  | 6.39E-03  | 24.58    | Increased |
| 11956 | SLC4A5       | 1.70 | 2.13E-03  | 4.78E-03  | 27.08    | Increased |



|       |              |      |           |           |          |           |
|-------|--------------|------|-----------|-----------|----------|-----------|
| 11957 | ARID5B       | 1.71 | 5.75E-62  | 5.24E-60  | 1817.37  | Increased |
| 11958 | ZNF548       | 1.71 | 1.85E-37  | 7.24E-36  | 1025.94  | Increased |
| 11959 | YPEL2        | 1.71 | 3.29E-03  | 7.14E-03  | 22.28    | Increased |
| 11960 | TEX19        | 1.71 | 2.60E-32  | 7.29E-31  | 759.79   | Increased |
| 11961 | FAAH         | 1.71 | 3.94E-23  | 6.17E-22  | 526.87   | Increased |
| 11962 | JMY          | 1.71 | 9.32E-38  | 3.76E-36  | 978.82   | Increased |
| 11963 | PLCL1        | 1.71 | 2.44E-10  | 1.38E-09  | 174.21   | Increased |
| 11964 | RGS1         | 1.71 | 4.41E-05  | 1.34E-04  | 64.66    | Increased |
| 11965 | SHC4         | 1.71 | 4.24E-04  | 1.09E-03  | 50.93    | Increased |
| 11966 | LINC00847    | 1.71 | 8.76E-36  | 3.10E-34  | 888.80   | Increased |
| 11967 | CCR9         | 1.71 | 1.33E-99  | 3.38E-97  | 4877.95  | Increased |
| 11968 | PRKCE        | 1.72 | 4.14E-85  | 7.43E-83  | 2778.24  | Increased |
| 11969 | GPR153       | 1.72 | 1.81E-29  | 4.25E-28  | 639.79   | Increased |
| 11970 | SPATA20      | 1.72 | 4.90E-05  | 1.48E-04  | 61.65    | Increased |
| 11971 | ZNF763       | 1.72 | 6.49E-06  | 2.21E-05  | 77.41    | Increased |
| 11972 | KIAA1211     | 1.72 | 5.20E-12  | 3.45E-11  | 212.78   | Increased |
| 11973 | FMNL2        | 1.73 | 3.08E-12  | 2.08E-11  | 212.82   | Increased |
| 11974 | CYTH2        | 1.73 | 8.57E-69  | 9.69E-67  | 2837.31  | Increased |
| 11975 | SLC29A4      | 1.73 | 1.74E-15  | 1.56E-14  | 284.64   | Increased |
| 11976 | CELF6        | 1.73 | 6.19E-09  | 3.03E-08  | 184.06   | Increased |
| 11977 | ING4         | 1.73 | 1.46E-32  | 4.17E-31  | 1011.64  | Increased |
| 11978 | BCL2L2       | 1.73 | 1.03E-03  | 2.46E-03  | 30.44    | Increased |
| 11979 | LOC730101    | 1.74 | 1.45E-51  | 9.50E-50  | 1270.65  | Increased |
| 11980 | GIMAP2       | 1.74 | 7.41E-92  | 1.59E-89  | 4517.29  | Increased |
| 11981 | CLEC2D       | 1.74 | 1.74E-30  | 4.32E-29  | 829.96   | Increased |
| 11982 | XRCC1        | 1.74 | 3.64E-59  | 3.07E-57  | 1933.18  | Increased |
| 11983 | CCNG1        | 1.74 | 1.74E-117 | 7.58E-115 | 5139.86  | Increased |
| 11984 | ZNF70        | 1.74 | 1.68E-11  | 1.06E-10  | 227.03   | Increased |
| 11985 | YPEL3        | 1.74 | 3.16E-14  | 2.55E-13  | 266.85   | Increased |
| 11986 | RPL10        | 1.75 | 7.29E-18  | 7.98E-17  | 11902.47 | Increased |
| 11987 | CR2          | 1.75 | 3.21E-82  | 5.44E-80  | 2076.64  | Increased |
| 11988 | GLYCTK       | 1.75 | 1.60E-16  | 1.57E-15  | 297.39   | Increased |
| 11989 | CD37         | 1.75 | 1.02E-71  | 1.24E-69  | 1820.86  | Increased |
| 11990 | ABC7         | 1.75 | 3.67E-52  | 2.51E-50  | 1195.90  | Increased |
| 11991 | ERVK13-1     | 1.75 | 1.61E-14  | 1.33E-13  | 271.88   | Increased |
| 11992 | RNF215       | 1.76 | 3.95E-09  | 1.98E-08  | 137.15   | Increased |
| 11993 | FAM132B      | 1.76 | 7.78E-06  | 2.62E-05  | 70.24    | Increased |
| 11994 | GOLGA8B      | 1.76 | 4.13E-07  | 1.64E-06  | 885.00   | Increased |
| 11995 | NPHP3-ACAD11 | 1.76 | 6.44E-04  | 1.59E-03  | 39.21    | Increased |
| 11996 | ITGA1        | 1.76 | 4.74E-125 | 2.52E-122 | 6413.07  | Increased |
| 11997 | ADAM1A       | 1.76 | 1.16E-14  | 9.72E-14  | 271.41   | Increased |
| 11998 | HBP1         | 1.77 | 2.25E-35  | 7.75E-34  | 756.27   | Increased |
| 11999 | SYCE2        | 1.77 | 8.88E-10  | 4.71E-09  | 151.60   | Increased |
| 12000 | MIATNB       | 1.77 | 2.45E-10  | 1.39E-09  | 154.58   | Increased |
| 12001 | SHF          | 1.77 | 2.96E-07  | 1.19E-06  | 97.08    | Increased |
| 12002 | HEMGN        | 1.77 | 3.21E-15  | 2.83E-14  | 264.84   | Increased |
| 12003 | ZNF333       | 1.77 | 9.50E-15  | 8.05E-14  | 272.68   | Increased |
| 12004 | MST1         | 1.77 | 1.96E-07  | 8.10E-07  | 102.78   | Increased |
| 12005 | DNASE1       | 1.77 | 1.04E-31  | 2.79E-30  | 690.02   | Increased |
| 12006 | LOC100506548 | 1.77 | 2.63E-70  | 3.12E-68  | 2038.66  | Increased |
| 12007 | MAN2A2       | 1.78 | 1.17E-20  | 1.55E-19  | 2086.08  | Increased |
| 12008 | TRIB2        | 1.78 | 7.41E-159 | 6.97E-156 | 8802.57  | Increased |
| 12009 | EPB41L4A     | 1.78 | 3.58E-14  | 2.88E-13  | 269.54   | Increased |
| 12010 | DDAH2        | 1.78 | 7.44E-33  | 2.17E-31  | 834.25   | Increased |
| 12011 | PILRA        | 1.78 | 1.44E-08  | 6.74E-08  | 121.47   | Increased |
| 12012 | UCP2         | 1.78 | 2.51E-86  | 4.65E-84  | 2989.78  | Increased |
| 12013 | PBXIP1       | 1.78 | 1.79E-97  | 4.29E-95  | 2414.93  | Increased |
| 12014 | HYMAI        | 1.78 | 5.04E-03  | 1.06E-02  | 14.49    | Increased |
| 12015 | TMEM44       | 1.79 | 3.05E-32  | 8.44E-31  | 676.73   | Increased |
| 12016 | MEX3B        | 1.79 | 2.76E-10  | 1.56E-09  | 181.18   | Increased |
| 12017 | LOC202181    | 1.79 | 4.01E-07  | 1.59E-06  | 387.48   | Increased |
| 12018 | GPR174       | 1.79 | 2.35E-52  | 1.62E-50  | 1106.09  | Increased |
| 12019 | ATG16L2      | 1.79 | 2.39E-13  | 1.78E-12  | 1399.61  | Increased |
| 12020 | CXXC5        | 1.79 | 2.88E-42  | 1.37E-40  | 920.07   | Increased |
| 12021 | ACRBP        | 1.80 | 7.35E-04  | 1.80E-03  | 35.87    | Increased |
| 12022 | ELL3         | 1.80 | 4.66E-06  | 1.62E-05  | 70.04    | Increased |
| 12023 | MFSD4        | 1.80 | 9.04E-04  | 2.18E-03  | 27.38    | Increased |
| 12024 | PON1         | 1.80 | 1.95E-06  | 7.12E-06  | 78.01    | Increased |
| 12025 | GPR137C      | 1.80 | 3.91E-06  | 1.37E-05  | 68.17    | Increased |
| 12026 | DYRK1B       | 1.80 | 2.33E-12  | 1.59E-11  | 227.59   | Increased |
| 12027 | DALRD3       | 1.80 | 3.81E-24  | 6.41E-23  | 453.70   | Increased |
| 12028 | ASB16-AS1    | 1.81 | 1.26E-23  | 2.05E-22  | 508.77   | Increased |
| 12029 | LOC100507373 | 1.81 | 3.84E-14  | 3.07E-13  | 213.19   | Increased |
| 12030 | HIC1         | 1.81 | 3.84E-04  | 9.93E-04  | 34.14    | Increased |
| 12031 | ARRDC3       | 1.81 | 1.23E-51  | 8.11E-50  | 1409.73  | Increased |
| 12032 | ABCA13       | 1.81 | 7.50E-03  | 1.51E-02  | 11.39    | Increased |
| 12033 | IGBP1        | 1.81 | 6.56E-80  | 1.04E-77  | 2102.87  | Increased |
| 12034 | SPHK1        | 1.81 | 8.42E-10  | 4.48E-09  | 134.45   | Increased |
| 12035 | GPR18        | 1.82 | 4.64E-07  | 1.83E-06  | 84.36    | Increased |
| 12036 | ERBB2        | 1.82 | 5.19E-18  | 5.74E-17  | 288.73   | Increased |
| 12037 | NOA1         | 1.82 | 6.34E-95  | 1.41E-92  | 2474.10  | Increased |
| 12038 | LINC00954    | 1.82 | 3.11E-04  | 8.19E-04  | 37.03    | Increased |
| 12039 | SPTBN2       | 1.82 | 1.82E-95  | 4.12E-93  | 2347.32  | Increased |
| 12040 | OTUD1        | 1.82 | 1.69E-05  | 5.45E-05  | 56.65    | Increased |
| 12041 | EV12A        | 1.82 | 1.94E-43  | 9.43E-42  | 846.12   | Increased |
| 12042 | PGAP3        | 1.83 | 5.20E-29  | 1.18E-27  | 512.73   | Increased |
| 12043 | MXD1         | 1.83 | 2.21E-18  | 2.53E-17  | 308.67   | Increased |
| 12044 | CELF5        | 1.83 | 2.94E-06  | 1.05E-05  | 71.96    | Increased |

|       |              |      |           |           |          |           |
|-------|--------------|------|-----------|-----------|----------|-----------|
| 12045 | S1PR1        | 1.83 | 1.06E-103 | 3.02E-101 | 2392.25  | Increased |
| 12046 | TMEM238      | 1.83 | 4.89E-05  | 1.47E-04  | 51.28    | Increased |
| 12047 | TMEM132D     | 1.83 | 5.87E-23  | 9.07E-22  | 472.79   | Increased |
| 12048 | CAMLG        | 1.83 | 1.59E-65  | 1.61E-63  | 2087.65  | Increased |
| 12049 | EPB41L4A-AS1 | 1.84 | 5.10E-37  | 1.95E-35  | 725.03   | Increased |
| 12050 | TTYH2        | 1.84 | 1.30E-22  | 1.97E-21  | 407.01   | Increased |
| 12051 | ERMAP        | 1.84 | 1.15E-17  | 1.25E-16  | 275.43   | Increased |
| 12052 | ABTB2        | 1.84 | 8.25E-12  | 5.38E-11  | 171.66   | Increased |
| 12053 | MORN3        | 1.84 | 1.53E-03  | 3.53E-03  | 22.10    | Increased |
| 12054 | MZF1         | 1.85 | 8.75E-24  | 1.44E-22  | 488.90   | Increased |
| 12055 | PTP4A3       | 1.85 | 1.31E-42  | 6.29E-41  | 829.89   | Increased |
| 12056 | NXN          | 1.85 | 4.37E-07  | 1.73E-06  | 84.73    | Increased |
| 12057 | ALDH1A2      | 1.85 | 5.65E-32  | 1.54E-30  | 665.79   | Increased |
| 12058 | IL4          | 1.85 | 1.18E-07  | 5.02E-07  | 95.51    | Increased |
| 12059 | MXD4         | 1.85 | 7.87E-37  | 2.98E-35  | 650.17   | Increased |
| 12060 | FAM3         | 1.86 | 4.11E-34  | 1.32E-32  | 581.06   | Increased |
| 12061 | DPEP1        | 1.86 | 7.45E-06  | 2.52E-05  | 57.93    | Increased |
| 12062 | C9orf47      | 1.86 | 2.71E-03  | 5.99E-03  | 19.01    | Increased |
| 12063 | CCDC42B      | 1.86 | 1.80E-12  | 1.24E-11  | 171.91   | Increased |
| 12064 | RDM1         | 1.87 | 5.66E-07  | 2.20E-06  | 80.20    | Increased |
| 12065 | TMEM91       | 1.87 | 1.59E-06  | 5.86E-06  | 69.01    | Increased |
| 12066 | MYLK4        | 1.87 | 1.81E-04  | 4.97E-04  | 34.77    | Increased |
| 12067 | CHI3L2       | 1.87 | 3.19E-163 | 3.54E-160 | 38177.48 | Increased |
| 12068 | FIGNL2       | 1.87 | 5.08E-08  | 2.25E-07  | 96.85    | Increased |
| 12069 | SERINC5      | 1.87 | 1.80E-205 | 3.15E-202 | 9645.68  | Increased |
| 12070 | FLJ20021     | 1.88 | 4.55E-06  | 1.58E-05  | 63.36    | Increased |
| 12071 | LOC101928150 | 1.88 | 8.82E-03  | 1.75E-02  | 7.93     | Increased |
| 12072 | AMY2B        | 1.88 | 3.39E-06  | 1.20E-05  | 75.04    | Increased |
| 12073 | HHAT         | 1.89 | 3.71E-12  | 2.49E-11  | 160.43   | Increased |
| 12074 | HDC          | 1.89 | 9.45E-04  | 2.27E-03  | 25.02    | Increased |
| 12075 | ZBED6CL      | 1.89 | 1.48E-66  | 1.53E-64  | 1270.66  | Increased |
| 12076 | LOC100130992 | 1.89 | 4.59E-04  | 1.17E-03  | 29.28    | Increased |
| 12077 | UMODL1       | 1.89 | 9.99E-19  | 1.17E-17  | 259.57   | Increased |
| 12078 | LOC100049716 | 1.90 | 9.23E-05  | 2.67E-04  | 37.66    | Increased |
| 12079 | BCL6         | 1.90 | 8.30E-11  | 4.91E-10  | 133.71   | Increased |
| 12080 | ZNF16        | 1.90 | 6.46E-21  | 8.77E-20  | 327.34   | Increased |
| 12081 | EXPH5        | 1.90 | 1.21E-07  | 5.14E-07  | 80.98    | Increased |
| 12082 | APOLD1       | 1.91 | 1.20E-11  | 7.72E-11  | 166.64   | Increased |
| 12083 | CEBPE        | 1.91 | 8.85E-06  | 2.96E-05  | 53.51    | Increased |
| 12084 | TMEM254-AS1  | 1.91 | 5.55E-04  | 1.39E-03  | 27.33    | Increased |
| 12085 | HSD17B11     | 1.91 | 1.93E-82  | 3.33E-80  | 1449.81  | Increased |
| 12086 | KLF8         | 1.91 | 1.62E-03  | 3.73E-03  | 18.69    | Increased |
| 12087 | ZNF704       | 1.91 | 1.15E-20  | 1.53E-19  | 296.13   | Increased |
| 12088 | TNFRSF13C    | 1.92 | 1.39E-05  | 4.53E-05  | 63.86    | Increased |
| 12089 | OLFM2        | 1.92 | 1.88E-05  | 6.01E-05  | 46.47    | Increased |
| 12090 | TNFRSF14     | 1.93 | 2.34E-87  | 4.53E-85  | 1699.28  | Increased |
| 12091 | LOC100131289 | 1.93 | 4.41E-10  | 2.43E-09  | 113.36   | Increased |
| 12092 | TESK2        | 1.93 | 5.70E-24  | 9.48E-23  | 345.10   | Increased |
| 12093 | SLC35E2      | 1.93 | 4.83E-44  | 2.47E-42  | 735.74   | Increased |
| 12094 | FGFR1        | 1.93 | 1.12E-06  | 4.23E-06  | 63.62    | Increased |
| 12095 | ZEB1-AS1     | 1.94 | 9.46E-44  | 4.70E-42  | 653.68   | Increased |
| 12096 | GUCY1A2      | 1.94 | 3.67E-08  | 1.65E-07  | 86.88    | Increased |
| 12097 | CACNA1I      | 1.94 | 2.02E-05  | 6.44E-05  | 47.38    | Increased |
| 12098 | CCNG2        | 1.94 | 3.86E-90  | 7.86E-88  | 1563.19  | Increased |
| 12099 | DFNA5        | 1.94 | 1.94E-05  | 6.20E-05  | 47.89    | Increased |
| 12100 | RIPK4        | 1.95 | 5.25E-10  | 2.87E-09  | 117.05   | Increased |
| 12101 | TPM2         | 1.95 | 1.72E-15  | 1.54E-14  | 265.47   | Increased |
| 12102 | HY1          | 1.95 | 7.41E-33  | 2.16E-31  | 452.87   | Increased |
| 12103 | C1R          | 1.95 | 4.43E-24  | 7.42E-23  | 319.74   | Increased |
| 12104 | CACNA1A      | 1.96 | 3.73E-04  | 9.66E-04  | 25.83    | Increased |
| 12105 | SNHG5        | 1.97 | 2.82E-74  | 3.70E-72  | 1179.63  | Increased |
| 12106 | C19orf57     | 1.97 | 1.18E-23  | 1.92E-22  | 330.91   | Increased |
| 12107 | FRAT1        | 1.98 | 1.25E-15  | 1.14E-14  | 202.14   | Increased |
| 12108 | MICALL2      | 1.98 | 2.52E-13  | 1.87E-12  | 159.82   | Increased |
| 12109 | ZNF496       | 1.99 | 2.32E-78  | 3.45E-76  | 1665.14  | Increased |
| 12110 | RTP5         | 1.99 | 1.08E-09  | 5.69E-09  | 101.41   | Increased |
| 12111 | ZNF581       | 1.99 | 1.35E-52  | 9.37E-51  | 843.58   | Increased |
| 12112 | FOXD4        | 2.00 | 3.38E-03  | 7.34E-03  | 12.49    | Increased |
| 12113 | TOB1-AS1     | 2.00 | 1.44E-05  | 4.68E-05  | 42.51    | Increased |
| 12114 | IL23A        | 2.00 | 5.33E-11  | 3.21E-10  | 122.94   | Increased |
| 12115 | LINC00473    | 2.00 | 5.02E-04  | 1.27E-03  | 23.36    | Increased |
| 12116 | EFHC1        | 2.01 | 7.82E-24  | 1.29E-22  | 351.72   | Increased |
| 12117 | RHEBL1       | 2.02 | 4.35E-13  | 3.17E-12  | 139.54   | Increased |
| 12118 | PDE4A        | 2.02 | 1.56E-14  | 1.29E-13  | 159.07   | Increased |
| 12119 | LINC00462    | 2.02 | 8.42E-04  | 2.04E-03  | 23.55    | Increased |
| 12120 | NHLRC4       | 2.02 | 7.25E-06  | 2.46E-05  | 51.00    | Increased |
| 12121 | ZNF425       | 2.02 | 1.94E-08  | 9.02E-08  | 87.33    | Increased |
| 12122 | CTTN         | 2.03 | 2.43E-10  | 1.38E-09  | 111.27   | Increased |
| 12123 | IDUA         | 2.03 | 1.03E-25  | 1.91E-24  | 399.58   | Increased |
| 12124 | ZNF844       | 2.03 | 1.15E-03  | 2.73E-03  | 17.86    | Increased |
| 12125 | MFGE8        | 2.03 | 4.18E-110 | 1.60E-107 | 1975.54  | Increased |
| 12126 | LOC440311    | 2.03 | 8.70E-09  | 4.21E-08  | 80.81    | Increased |
| 12127 | CD68         | 2.04 | 1.16E-09  | 6.09E-09  | 100.05   | Increased |
| 12128 | LOC101927768 | 2.05 | 1.16E-03  | 2.74E-03  | 19.03    | Increased |
| 12129 | HAPLN3       | 2.05 | 5.44E-06  | 1.87E-05  | 46.51    | Increased |
| 12130 | SNHG6        | 2.05 | 3.82E-97  | 8.98E-95  | 3651.89  | Increased |
| 12131 | LOC100130476 | 2.05 | 7.78E-17  | 7.82E-16  | 198.85   | Increased |
| 12132 | LETMD1       | 2.06 | 2.32E-164 | 2.84E-161 | 3210.33  | Increased |

|       |                |      |           |           |          |           |
|-------|----------------|------|-----------|-----------|----------|-----------|
| 12133 | WNT8B          | 2.08 | 2.66E-06  | 9.52E-06  | 47.92    | Increased |
| 12134 | ARHGAP19-SLIT1 | 2.09 | 4.71E-05  | 1.42E-04  | 36.03    | Increased |
| 12135 | SCN7A          | 2.10 | 2.61E-152 | 2.13E-149 | 3673.98  | Increased |
| 12136 | CREBRF         | 2.10 | 3.37E-25  | 6.11E-24  | 307.66   | Increased |
| 12137 | LOC101927415   | 2.10 | 9.40E-05  | 2.71E-04  | 28.32    | Increased |
| 12138 | LPAR6          | 2.11 | 5.83E-107 | 1.83E-104 | 2727.76  | Increased |
| 12139 | SIGLEC6        | 2.11 | 1.32E-110 | 5.19E-108 | 2022.91  | Increased |
| 12140 | MST1P2         | 2.12 | 2.25E-05  | 7.11E-05  | 35.22    | Increased |
| 12141 | FAM20C         | 2.13 | 5.30E-05  | 1.59E-04  | 31.24    | Increased |
| 12142 | PRDM11         | 2.13 | 3.88E-08  | 1.74E-07  | 65.57    | Increased |
| 12143 | C12orf76       | 2.13 | 7.35E-36  | 2.63E-34  | 388.47   | Increased |
| 12144 | LRRC36         | 2.13 | 6.65E-04  | 1.64E-03  | 18.40    | Increased |
| 12145 | CDT1           | 2.14 | 5.45E-214 | 1.11E-210 | 11729.87 | Increased |
| 12146 | TIGD7          | 2.15 | 2.00E-13  | 1.50E-12  | 123.53   | Increased |
| 12147 | MAP3K8         | 2.15 | 1.46E-06  | 5.42E-06  | 47.69    | Increased |
| 12148 | CD40LG         | 2.17 | 3.24E-127 | 1.80E-124 | 2963.17  | Increased |
| 12149 | CREB3L4        | 2.17 | 4.51E-31  | 1.16E-29  | 344.52   | Increased |
| 12150 | ABTB1          | 2.18 | 5.11E-38  | 2.08E-36  | 423.66   | Increased |
| 12151 | KCTD1          | 2.19 | 1.40E-100 | 3.63E-98  | 1582.37  | Increased |
| 12152 | IGLL1          | 2.19 | 2.07E-111 | 8.44E-109 | 1976.37  | Increased |
| 12153 | ZNF277         | 2.19 | 1.20E-94  | 2.62E-92  | 1281.97  | Increased |
| 12154 | PCGF1          | 2.19 | 1.49E-44  | 7.80E-43  | 495.44   | Increased |
| 12155 | DERL3          | 2.20 | 6.44E-13  | 4.63E-12  | 108.29   | Increased |
| 12156 | YPEL1          | 2.20 | 1.95E-104 | 5.81E-102 | 1320.86  | Increased |
| 12157 | TMEM26         | 2.20 | 6.53E-91  | 1.35E-88  | 1040.88  | Increased |
| 12158 | LOC100131347   | 2.20 | 1.09E-04  | 3.10E-04  | 26.60    | Increased |
| 12159 | C17orf100      | 2.21 | 2.11E-07  | 8.66E-07  | 51.53    | Increased |
| 12160 | LRRC70         | 2.22 | 1.08E-07  | 4.62E-07  | 57.15    | Increased |
| 12161 | MT1E           | 2.23 | 4.21E-86  | 7.67E-84  | 1598.96  | Increased |
| 12162 | TEC            | 2.23 | 2.17E-12  | 1.49E-11  | 101.32   | Increased |
| 12163 | PCAT18         | 2.24 | 2.03E-79  | 3.17E-77  | 961.76   | Increased |
| 12164 | MT1H           | 2.24 | 3.28E-22  | 4.81E-21  | 2304.39  | Increased |
| 12165 | ZNF521         | 2.25 | 4.73E-09  | 2.34E-08  | 67.09    | Increased |
| 12166 | LOC400685      | 2.25 | 5.80E-07  | 2.25E-06  | 44.69    | Increased |
| 12167 | SCARB2         | 2.26 | 4.24E-63  | 4.08E-61  | 649.14   | Increased |
| 12168 | LOC729683      | 2.26 | 1.21E-12  | 8.50E-12  | 111.05   | Increased |
| 12169 | CACNA1C-AS2    | 2.27 | 2.04E-04  | 5.55E-04  | 20.46    | Increased |
| 12170 | C16orf86       | 2.28 | 1.38E-04  | 3.85E-04  | 22.15    | Increased |
| 12171 | SLC20A1        | 2.29 | 0.00E+00  | 0.00E+00  | 5506.61  | Increased |
| 12172 | PPP1R16B       | 2.30 | 6.23E-101 | 1.65E-98  | 1494.69  | Increased |
| 12173 | HEXIM2         | 2.30 | 2.06E-19  | 2.53E-18  | 184.24   | Increased |
| 12174 | H1FX-AS1       | 2.36 | 7.06E-14  | 5.51E-13  | 108.53   | Increased |
| 12175 | LOC100130093   | 2.38 | 2.03E-04  | 5.52E-04  | 18.55    | Increased |
| 12176 | NEURL1B        | 2.39 | 1.19E-24  | 2.06E-23  | 204.88   | Increased |
| 12177 | ANGPTL6        | 2.44 | 3.22E-23  | 5.08E-22  | 181.99   | Increased |
| 12178 | PLXNB1         | 2.45 | 5.43E-20  | 6.93E-19  | 171.56   | Increased |
| 12179 | FCGBP          | 2.46 | 9.15E-49  | 5.35E-47  | 453.98   | Increased |
| 12180 | NEURL2         | 2.49 | 1.93E-09  | 9.94E-09  | 58.48    | Increased |
| 12181 | ADSSL1         | 2.49 | 8.57E-10  | 4.55E-09  | 59.62    | Increased |
| 12182 | KLHL24         | 2.52 | 1.27E-77  | 1.82E-75  | 783.04   | Increased |
| 12183 | TCAM1P         | 2.55 | 1.39E-17  | 1.50E-16  | 116.91   | Increased |
| 12184 | SNHG7          | 2.55 | 2.39E-224 | 5.84E-221 | 2373.42  | Increased |
| 12185 | STAT5A         | 2.56 | 0.00E+00  | 0.00E+00  | 19149.66 | Increased |
| 12186 | JUP            | 2.56 | 1.51E-04  | 4.21E-04  | 18.43    | Increased |
| 12187 | CDH24          | 2.57 | 5.41E-41  | 2.48E-39  | 305.04   | Increased |
| 12188 | FOXB1          | 2.58 | 5.82E-08  | 2.56E-07  | 43.69    | Increased |
| 12189 | C6orf48        | 2.59 | 6.06E-125 | 2.96E-122 | 1349.35  | Increased |
| 12190 | TPGS1          | 2.59 | 3.22E-13  | 2.37E-12  | 303.50   | Increased |
| 12191 | ANXA2R         | 2.61 | 9.44E-124 | 4.44E-121 | 1033.61  | Increased |
| 12192 | CKAP4          | 2.62 | 2.94E-05  | 9.15E-05  | 21.69    | Increased |
| 12193 | NATD1          | 2.65 | 1.35E-62  | 1.28E-60  | 451.55   | Increased |
| 12194 | LINC01226      | 2.69 | 3.64E-07  | 1.46E-06  | 35.36    | Increased |
| 12195 | ATP6V0A4       | 2.74 | 3.22E-159 | 3.28E-156 | 1230.51  | Increased |
| 12196 | PI16           | 2.75 | 3.60E-08  | 1.62E-07  | 39.23    | Increased |
| 12197 | DNTT           | 2.76 | 0.00E+00  | 0.00E+00  | 8501.85  | Increased |
| 12198 | OSER1-AS1      | 2.78 | 1.33E-11  | 8.50E-11  | 59.13    | Increased |
| 12199 | SERINC2        | 2.81 | 7.28E-05  | 2.14E-04  | 17.42    | Increased |
| 12200 | HSD17B14       | 2.88 | 3.82E-14  | 3.06E-13  | 73.04    | Increased |
| 12201 | PGLYRP4        | 2.98 | 3.47E-04  | 9.06E-04  | 11.50    | Increased |
| 12202 | HOMER3         | 2.99 | 2.64E-08  | 1.21E-07  | 33.99    | Increased |
| 12203 | CACNA1C-AS1    | 3.00 | 1.59E-11  | 1.00E-10  | 54.65    | Increased |
| 12204 | MT1F           | 3.01 | 1.30E-10  | 7.56E-10  | 50.13    | Increased |
| 12205 | MF12-AS1       | 3.03 | 2.56E-16  | 2.46E-15  | 94.97    | Increased |
| 12206 | RAB26          | 3.04 | 4.82E-05  | 1.45E-04  | 15.90    | Increased |
| 12207 | PPIL6          | 3.04 | 3.29E-04  | 8.61E-04  | 12.49    | Increased |
| 12208 | FMN1           | 3.20 | 1.40E-06  | 5.21E-06  | 21.84    | Increased |
| 12209 | TDRD9          | 3.34 | 2.68E-17  | 2.80E-16  | 74.80    | Increased |
| 12210 | KIAA1644       | 3.54 | 1.32E-08  | 6.23E-08  | 29.89    | Increased |
| 12211 | LOC63930       | 3.85 | 7.06E-11  | 4.21E-10  | 34.97    | Increased |
| 12212 | SYT11          | 4.11 | 6.18E-52  | 4.13E-50  | 203.79   | Increased |
| 12213 | CR1            | 4.18 | 2.97E-13  | 2.19E-12  | 40.41    | Increased |
| 12214 | IL17D          | 4.31 | 1.31E-09  | 6.85E-09  | 26.63    | Increased |
| 12215 | LINC00304      | 4.45 | 9.17E-05  | 2.65E-04  | 9.23     | Increased |
| 12216 | BCL3           | 4.70 | 4.99E-07  | 1.96E-06  | 17.77    | Increased |
| 12217 | GRIN2D         | 5.44 | 2.81E-05  | 8.76E-05  | 9.28     | Increased |
| 12218 | DAAM2          | 7.70 | 3.81E-07  | 1.52E-06  | 12.16    | Increased |
| 12219 | RSPH4A         | 8.35 | 5.05E-05  | 1.52E-04  | 7.37     | Increased |

**Supplementary Table 7D:** Gene expression changes induced by RZ-2994 vs. DMSO at Day 1 on KOPTK1 cells.

Significance estimated based on DESeq2 (apeglm shrunken fold change) padj < 0.10. Effect of RZ-2994 on gene expression: decreased if log2FoldChange < -1.2, increased if log2FoldChange > 1.2. Base mean is the average DESeq2 normalized reads in DMSO replicates. Expressed genes have at least 10 reads in at least three replicate samples. Shown are the expressed genes at Day 1 ranked by RZ-2994 vs. DMSO log2FoldChange

| #  | Gene symbol (hg19) | log2FoldChange RZ-2994 vs. DMSO Day1 DESeq2 apeglm | pvalue RZ-2994 vs. DMSO Day1 DESeq2 | padj RZ-2994 vs. DMSO Day1 DESeq2 | baseMean RZ-2994 vs. DMSO Day1 DESeq2 | RZ-2994 effect on gene expression at Day 1 |
|----|--------------------|----------------------------------------------------|-------------------------------------|-----------------------------------|---------------------------------------|--------------------------------------------|
| 1  | H19                | -1.49                                              | 6.11E-26                            | 8.73E-23                          | 1097.71                               | Decreased                                  |
| 2  | PLK1               | -1.40                                              | 1.02E-41                            | 5.12E-38                          | 3361.99                               | Decreased                                  |
| 3  | CDC20              | -1.38                                              | 8.36E-42                            | 5.12E-38                          | 4745.60                               | Decreased                                  |
| 4  | RPS14P3            | -1.36                                              | 7.28E-04                            | 1.01E-02                          | 109.59                                | Decreased                                  |
| 5  | NOTCH3             | -1.35                                              | 1.87E-08                            | 1.77E-06                          | 410.66                                | Decreased                                  |
| 6  | LOC100129148       | -1.35                                              | 3.12E-03                            | NA                                | 66.35                                 | Decreased                                  |
| 7  | EIF5AL1            | -1.34                                              | 3.40E-04                            | 5.68E-03                          | 131.17                                | Decreased                                  |
| 8  | SLC35F3            | -1.30                                              | 5.94E-08                            | 4.57E-06                          | 538.34                                | Decreased                                  |
| 9  | SMTN               | -1.28                                              | 5.86E-07                            | 3.13E-05                          | 522.29                                | Decreased                                  |
| 10 | AK4                | -1.28                                              | 1.45E-03                            | 1.67E-02                          | 132.14                                | Decreased                                  |
| 11 | CCNB1              | -1.28                                              | 5.12E-21                            | 4.65E-18                          | 4162.64                               | Decreased                                  |
| 12 | AURKA              | -1.26                                              | 6.31E-14                            | 1.97E-11                          | 1696.83                               | Decreased                                  |
| 13 | PIF1               | -1.25                                              | 2.08E-04                            | 3.90E-03                          | 255.81                                | Decreased                                  |
| 14 | FAM64A             | -1.25                                              | 1.32E-06                            | 6.25E-05                          | 584.83                                | Decreased                                  |
| 15 | IKZF4              | -1.24                                              | 1.47E-09                            | 1.77E-07                          | 1338.90                               | Decreased                                  |
| 16 | RSC1A1             | -1.24                                              | 3.48E-04                            | 5.77E-03                          | 333.76                                | Decreased                                  |
| 17 | CENPE              | -1.23                                              | 4.55E-05                            | 1.15E-03                          | 3056.20                               | Decreased                                  |
| 18 | ZNF286B            | -1.23                                              | 3.28E-03                            | 3.00E-02                          | 128.23                                | Decreased                                  |
| 19 | KPNA2              | -1.22                                              | 6.06E-17                            | 3.03E-14                          | 4822.25                               | Decreased                                  |
| 20 | RARA               | -1.22                                              | 2.90E-08                            | 2.50E-06                          | 1099.92                               | Decreased                                  |
| 21 | MKNK2              | -1.21                                              | 2.01E-18                            | 1.26E-15                          | 5086.75                               | Decreased                                  |
| 22 | GPATCH4            | -1.21                                              | 1.74E-11                            | 3.34E-09                          | 3038.84                               | Decreased                                  |
| 23 | PTPN3              | -1.21                                              | 2.57E-05                            | 7.31E-04                          | 532.71                                | Decreased                                  |
| 24 | HMMR               | -1.21                                              | 2.78E-10                            | 3.86E-08                          | 1773.31                               | Decreased                                  |
| 25 | CDCA2              | -1.20                                              | 1.14E-11                            | 2.38E-09                          | 2459.98                               | Decreased                                  |
| 26 | PTTG1              | -1.20                                              | 6.24E-08                            | 4.69E-06                          | 1712.72                               | Decreased                                  |
| 27 | MICAL2             | -1.19                                              | 7.70E-07                            | 3.87E-05                          | 1213.92                               | not significant                            |
| 28 | BHLHE40            | -1.19                                              | 8.16E-07                            | 4.04E-05                          | 1058.66                               | not significant                            |
| 29 | RRP9               | -1.19                                              | 6.55E-08                            | 4.85E-06                          | 2419.53                               | not significant                            |
| 30 | LONRF2             | -1.18                                              | 8.48E-06                            | 2.91E-04                          | 1372.42                               | not significant                            |
| 31 | KIF4A              | -1.18                                              | 5.15E-10                            | 6.96E-08                          | 2403.26                               | not significant                            |
| 32 | TPMT               | -1.18                                              | 1.98E-04                            | 3.73E-03                          | 531.65                                | not significant                            |
| 33 | NOL10              | -1.18                                              | 1.95E-09                            | 2.30E-07                          | 2197.56                               | not significant                            |
| 34 | SFPQ               | -1.18                                              | 1.31E-19                            | 1.09E-16                          | 19192.10                              | not significant                            |
| 35 | WT1                | -1.18                                              | 3.26E-05                            | 8.68E-04                          | 789.26                                | not significant                            |
| 36 | CCNB2              | -1.18                                              | 4.08E-08                            | 3.32E-06                          | 2063.68                               | not significant                            |
| 37 | SPDL1              | -1.18                                              | 4.54E-08                            | 3.61E-06                          | 2166.22                               | not significant                            |
| 38 | AMER1              | -1.18                                              | 2.66E-05                            | 7.46E-04                          | 784.26                                | not significant                            |
| 39 | CCDC86             | -1.18                                              | 6.87E-12                            | 1.46E-09                          | 3681.49                               | not significant                            |
| 40 | ZNF256             | -1.17                                              | 1.59E-03                            | 1.79E-02                          | 305.72                                | not significant                            |
| 41 | UBE2C              | -1.17                                              | 3.94E-09                            | 4.33E-07                          | 4418.09                               | not significant                            |
| 42 | SENP3              | -1.17                                              | 2.81E-05                            | 7.72E-04                          | 884.32                                | not significant                            |
| 43 | LDHA               | -1.17                                              | 4.58E-17                            | 2.41E-14                          | 40022.09                              | not significant                            |
| 44 | PNO1               | -1.17                                              | 5.65E-08                            | 4.38E-06                          | 1988.73                               | not significant                            |
| 45 | RPF2               | -1.17                                              | 5.30E-07                            | 2.85E-05                          | 2277.09                               | not significant                            |
| 46 | PRR11              | -1.17                                              | 4.43E-12                            | 1.03E-09                          | 5110.96                               | not significant                            |
| 47 | CDKN3              | -1.17                                              | 1.58E-05                            | 5.04E-04                          | 1094.98                               | not significant                            |
| 48 | ZHX1               | -1.17                                              | 1.57E-10                            | 2.32E-08                          | 4640.36                               | not significant                            |
| 49 | C12orf5            | -1.17                                              | 3.40E-04                            | 5.68E-03                          | 542.46                                | not significant                            |
| 50 | PCF11              | -1.17                                              | 1.32E-07                            | 8.82E-06                          | 3141.38                               | not significant                            |
| 51 | CKS2               | -1.17                                              | 1.56E-07                            | 1.00E-05                          | 2988.92                               | not significant                            |
| 52 | TFAP2E             | -1.17                                              | 7.90E-03                            | 5.67E-02                          | 105.56                                | not significant                            |
| 53 | PKI55              | -1.16                                              | 1.98E-03                            | 2.09E-02                          | 390.62                                | not significant                            |
| 54 | KIF20A             | -1.16                                              | 9.09E-07                            | 4.46E-05                          | 1483.98                               | not significant                            |
| 55 | TUBA1C             | -1.16                                              | 5.10E-10                            | 6.96E-08                          | 6588.75                               | not significant                            |
| 56 | ZNF587B            | -1.16                                              | 1.66E-03                            | 1.85E-02                          | 362.10                                | not significant                            |
| 57 | MAK16              | -1.16                                              | 1.54E-10                            | 2.30E-08                          | 3598.19                               | not significant                            |
| 58 | NCR3LG1            | -1.16                                              | 6.30E-04                            | 9.01E-03                          | 842.72                                | not significant                            |
| 59 | TAMM41             | -1.16                                              | 3.28E-03                            | 3.00E-02                          | 260.68                                | not significant                            |
| 60 | TOP2A              | -1.16                                              | 3.48E-11                            | 5.80E-09                          | 28280.91                              | not significant                            |
| 61 | ENPEP              | -1.16                                              | 9.74E-08                            | 6.87E-06                          | 2233.16                               | not significant                            |
| 62 | DMPK               | -1.16                                              | 1.47E-03                            | 1.69E-02                          | 407.80                                | not significant                            |
| 63 | LOC90784           | -1.15                                              | 1.33E-03                            | 1.57E-02                          | 423.60                                | not significant                            |
| 64 | LIF                | -1.15                                              | 3.61E-07                            | 2.08E-05                          | 3672.10                               | not significant                            |
| 65 | CDR2               | -1.15                                              | 2.33E-06                            | 9.88E-05                          | 1809.15                               | not significant                            |
| 66 | PRKCD              | -1.15                                              | 5.03E-03                            | 4.08E-02                          | 236.02                                | not significant                            |
| 67 | SUSD4              | -1.15                                              | 3.22E-03                            | 2.96E-02                          | 327.16                                | not significant                            |
| 68 | TXNIP              | -1.15                                              | 6.43E-04                            | 9.14E-03                          | 605.14                                | not significant                            |
| 69 | PAK1IP1            | -1.15                                              | 5.56E-06                            | 2.10E-04                          | 1835.04                               | not significant                            |
| 70 | ODC1               | -1.15                                              | 6.83E-10                            | 8.76E-08                          | 16060.26                              | not significant                            |
| 71 | AHDC1              | -1.15                                              | 4.53E-06                            | 1.80E-04                          | 1751.89                               | not significant                            |
| 72 | SAPCD2             | -1.15                                              | 2.98E-05                            | 8.09E-04                          | 1150.72                               | not significant                            |
| 73 | NOP16              | -1.15                                              | 7.75E-07                            | 3.88E-05                          | 2271.19                               | not significant                            |
| 74 | LYAR               | -1.15                                              | 1.84E-06                            | 8.21E-05                          | 3138.34                               | not significant                            |
| 75 | SGOL2              | -1.15                                              | 5.12E-07                            | 2.78E-05                          | 3657.96                               | not significant                            |

|     |              |       |          |          |          |                 |
|-----|--------------|-------|----------|----------|----------|-----------------|
| 76  | KCNU11       | -1.15 | 5.69E-09 | 6.06E-07 | 4238.70  | not significant |
| 77  | OGG1         | -1.15 | 5.78E-03 | 4.52E-02 | 264.21   | not significant |
| 78  | POLR3G       | -1.14 | 2.77E-05 | 7.65E-04 | 1277.85  | not significant |
| 79  | PLAGL2       | -1.14 | 1.47E-07 | 9.53E-06 | 4944.25  | not significant |
| 80  | EBNA1BP2     | -1.14 | 1.01E-07 | 7.04E-06 | 4412.88  | not significant |
| 81  | LOC100128361 | -1.14 | 8.72E-03 | 6.04E-02 | 152.80   | not significant |
| 82  | AMIGO3       | -1.14 | 9.24E-04 | 1.20E-02 | 632.72   | not significant |
| 83  | TUBB4B       | -1.14 | 3.12E-09 | 3.64E-07 | 5686.77  | not significant |
| 84  | TPX2         | -1.14 | 2.82E-12 | 7.23E-10 | 11367.67 | not significant |
| 85  | MGC27345     | -1.14 | 1.26E-03 | 1.50E-02 | 558.14   | not significant |
| 86  | PSRC1        | -1.14 | 5.40E-04 | 8.10E-03 | 752.21   | not significant |
| 87  | ZFR          | -1.14 | 7.84E-10 | 9.93E-08 | 5458.79  | not significant |
| 88  | TAF12        | -1.14 | 1.05E-04 | 2.26E-03 | 1141.95  | not significant |
| 89  | MTF1         | -1.14 | 1.78E-04 | 3.41E-03 | 1101.86  | not significant |
| 90  | PPARGC1B     | -1.14 | 1.72E-03 | 1.89E-02 | 833.43   | not significant |
| 91  | CSNK1G1      | -1.14 | 5.58E-05 | 1.35E-03 | 1894.29  | not significant |
| 92  | HN1          | -1.14 | 4.59E-07 | 2.52E-05 | 7896.67  | not significant |
| 93  | DNTTIP2      | -1.14 | 1.33E-07 | 8.84E-06 | 3112.82  | not significant |
| 94  | C12orf4      | -1.14 | 3.01E-04 | 5.25E-03 | 924.76   | not significant |
| 95  | PTPN7        | -1.14 | 5.77E-12 | 1.25E-09 | 12551.84 | not significant |
| 96  | TUBA4A       | -1.14 | 9.21E-04 | 1.20E-02 | 666.32   | not significant |
| 97  | NFS1         | -1.14 | 2.10E-04 | 3.92E-03 | 997.56   | not significant |
| 98  | ARHGAP11A    | -1.14 | 1.35E-06 | 6.31E-05 | 3465.38  | not significant |
| 99  | CDC48        | -1.14 | 1.06E-07 | 7.34E-06 | 3486.74  | not significant |
| 100 | C10orf2      | -1.13 | 2.13E-06 | 9.25E-05 | 2192.94  | not significant |
| 101 | KBTD8        | -1.13 | 7.94E-04 | 1.08E-02 | 717.62   | not significant |
| 102 | HSPA5        | -1.13 | 2.51E-11 | 4.56E-09 | 13779.34 | not significant |
| 103 | NEU3         | -1.13 | 5.44E-04 | 8.11E-03 | 1453.69  | not significant |
| 104 | TAF9B        | -1.13 | 6.40E-03 | 4.85E-02 | 274.04   | not significant |
| 105 | CCNF         | -1.13 | 9.92E-07 | 4.82E-05 | 2888.92  | not significant |
| 106 | DLGAP5       | -1.13 | 7.01E-07 | 3.56E-05 | 2673.02  | not significant |
| 107 | MIEF1        | -1.13 | 9.32E-08 | 6.67E-06 | 4144.14  | not significant |
| 108 | DCAF13       | -1.13 | 6.26E-06 | 2.29E-04 | 3198.67  | not significant |
| 109 | UTP14A       | -1.13 | 2.22E-06 | 9.55E-05 | 2392.85  | not significant |
| 110 | GEMIN5       | -1.13 | 6.21E-06 | 2.28E-04 | 2371.43  | not significant |
| 111 | KIF23        | -1.13 | 3.10E-05 | 8.31E-04 | 1891.05  | not significant |
| 112 | BMS1         | -1.13 | 4.51E-07 | 2.52E-05 | 4427.51  | not significant |
| 113 | NOLC1        | -1.13 | 3.32E-12 | 8.10E-10 | 15983.21 | not significant |
| 114 | GLS          | -1.13 | 3.71E-09 | 4.13E-07 | 8254.68  | not significant |
| 115 | POLR1B       | -1.13 | 6.03E-06 | 2.23E-04 | 2614.15  | not significant |
| 116 | EIF5         | -1.13 | 3.21E-11 | 5.54E-09 | 16188.24 | not significant |
| 117 | AEN          | -1.13 | 2.47E-05 | 7.15E-04 | 2154.62  | not significant |
| 118 | ZNF37A       | -1.13 | 3.17E-04 | 5.40E-03 | 2138.48  | not significant |
| 119 | KIF20B       | -1.13 | 3.52E-06 | 1.43E-04 | 3047.85  | not significant |
| 120 | UBE2S        | -1.13 | 3.67E-05 | 9.54E-04 | 4572.40  | not significant |
| 121 | ANKRD52      | -1.13 | 6.21E-06 | 2.28E-04 | 6809.97  | not significant |
| 122 | PITPNA       | -1.13 | 6.75E-07 | 3.44E-05 | 3444.82  | not significant |
| 123 | POLR3H       | -1.13 | 5.73E-06 | 2.15E-04 | 2817.85  | not significant |
| 124 | PDSS1        | -1.13 | 5.43E-04 | 8.11E-03 | 915.17   | not significant |
| 125 | DDX21        | -1.13 | 8.52E-10 | 1.07E-07 | 17492.87 | not significant |
| 126 | GTPBP4       | -1.13 | 2.78E-08 | 2.42E-06 | 5456.89  | not significant |
| 127 | MRPL35       | -1.13 | 1.36E-05 | 4.46E-04 | 2116.58  | not significant |
| 128 | TRMT44       | -1.12 | 4.86E-03 | 3.97E-02 | 401.88   | not significant |
| 129 | BAIAP2-AS1   | -1.12 | 7.16E-03 | 5.29E-02 | 312.40   | not significant |
| 130 | PHLDA3       | -1.12 | 3.37E-03 | 3.05E-02 | 502.02   | not significant |
| 131 | TWISTNB      | -1.12 | 7.39E-06 | 2.64E-04 | 2402.19  | not significant |
| 132 | NOL6         | -1.12 | 4.43E-08 | 3.57E-06 | 4826.43  | not significant |
| 133 | SLC22A5      | -1.12 | 6.74E-03 | 5.05E-02 | 353.90   | not significant |
| 134 | ARCNI        | -1.12 | 2.81E-04 | 4.96E-03 | 1433.76  | not significant |
| 135 | RNF145       | -1.12 | 1.35E-07 | 8.86E-06 | 4934.73  | not significant |
| 136 | GRPEL1       | -1.12 | 1.09E-04 | 2.33E-03 | 1841.19  | not significant |
| 137 | HSPE1        | -1.12 | 7.85E-05 | 1.78E-03 | 2333.95  | not significant |
| 138 | PKM          | -1.12 | 2.17E-08 | 2.03E-06 | 20249.05 | not significant |
| 139 | LGALS1       | -1.12 | 1.87E-03 | 2.01E-02 | 799.35   | not significant |
| 140 | FARSB        | -1.12 | 1.88E-06 | 8.34E-05 | 3669.07  | not significant |
| 141 | KIF14        | -1.12 | 5.13E-05 | 1.26E-03 | 2928.86  | not significant |
| 142 | IL2RB        | -1.12 | 2.54E-05 | 7.27E-04 | 2011.68  | not significant |
| 143 | RXRA         | -1.12 | 3.42E-03 | 3.07E-02 | 584.93   | not significant |
| 144 | MDC1         | -1.12 | 5.56E-03 | 4.38E-02 | 407.02   | not significant |
| 145 | RITA1        | -1.12 | 1.19E-04 | 2.47E-03 | 1846.22  | not significant |
| 146 | WDR75        | -1.12 | 1.09E-05 | 3.59E-04 | 2492.19  | not significant |
| 147 | DKC1         | -1.12 | 1.35E-06 | 6.31E-05 | 3753.12  | not significant |
| 148 | CCDC6        | -1.12 | 1.53E-04 | 3.04E-03 | 1524.74  | not significant |
| 149 | TOMM34       | -1.12 | 1.86E-04 | 3.55E-03 | 1917.25  | not significant |
| 150 | TMEM229B     | -1.12 | 8.09E-04 | 1.10E-02 | 989.16   | not significant |
| 151 | HSPA4        | -1.12 | 4.01E-08 | 3.31E-06 | 8152.47  | not significant |
| 152 | TCEB3        | -1.12 | 2.84E-05 | 7.76E-04 | 2832.33  | not significant |
| 153 | TACC3        | -1.12 | 2.56E-08 | 2.26E-06 | 6524.32  | not significant |
| 154 | CENPA        | -1.12 | 4.86E-04 | 7.48E-03 | 1132.61  | not significant |
| 155 | NAA50        | -1.12 | 6.41E-10 | 8.34E-08 | 12424.31 | not significant |
| 156 | ZC3HAV1L     | -1.12 | 1.85E-03 | 2.00E-02 | 898.87   | not significant |
| 157 | IGF1R        | -1.12 | 5.55E-05 | 1.35E-03 | 2003.03  | not significant |
| 158 | ESF1         | -1.12 | 9.45E-05 | 2.07E-03 | 2169.01  | not significant |
| 159 | HNRNPM       | -1.12 | 2.26E-08 | 2.09E-06 | 16146.55 | not significant |
| 160 | GDF11        | -1.12 | 2.68E-04 | 4.77E-03 | 1559.83  | not significant |
| 161 | DDX18        | -1.12 | 5.50E-08 | 4.30E-06 | 6540.87  | not significant |
| 162 | SMEK2        | -1.12 | 5.99E-08 | 4.57E-06 | 5939.95  | not significant |
| 163 | R3HDM1       | -1.12 | 7.88E-06 | 2.75E-04 | 4491.34  | not significant |

|     |          |       |          |          |           |                 |
|-----|----------|-------|----------|----------|-----------|-----------------|
| 164 | BIRC5    | -1.12 | 4.77E-06 | 1.86E-04 | 7416.09   | not significant |
| 165 | BUB1     | -1.12 | 1.49E-07 | 9.63E-06 | 5342.91   | not significant |
| 166 | SNRNP40  | -1.12 | 2.08E-05 | 6.27E-04 | 3225.66   | not significant |
| 167 | PAPOLA   | -1.11 | 8.86E-09 | 8.87E-07 | 10734.10  | not significant |
| 168 | GTF2H1   | -1.11 | 4.00E-05 | 1.03E-03 | 2258.14   | not significant |
| 169 | DHX34    | -1.11 | 1.93E-04 | 3.67E-03 | 1545.83   | not significant |
| 170 | TRMT61A  | -1.11 | 3.58E-04 | 5.90E-03 | 1458.54   | not significant |
| 171 | SIK1     | -1.11 | 8.72E-03 | 6.04E-02 | 325.57    | not significant |
| 172 | TFRC     | -1.11 | 1.77E-07 | 1.10E-05 | 35439.15  | not significant |
| 173 | LLPH     | -1.11 | 3.99E-04 | 6.40E-03 | 1525.99   | not significant |
| 174 | GALNS    | -1.11 | 9.84E-03 | 6.57E-02 | 294.82    | not significant |
| 175 | C3orf18  | -1.11 | 1.95E-03 | 2.07E-02 | 893.53    | not significant |
| 176 | SIKE1    | -1.11 | 2.78E-06 | 1.17E-04 | 3926.27   | not significant |
| 177 | KIAA2018 | -1.11 | 1.19E-03 | 1.44E-02 | 1782.23   | not significant |
| 178 | LCLAT1   | -1.11 | 2.08E-03 | 2.17E-02 | 1131.11   | not significant |
| 179 | ATP6V1B2 | -1.11 | 2.24E-05 | 6.67E-04 | 3344.22   | not significant |
| 180 | PSME3    | -1.11 | 3.44E-09 | 3.87E-07 | 9502.01   | not significant |
| 181 | GTF3C4   | -1.11 | 5.86E-04 | 8.57E-03 | 1332.71   | not significant |
| 182 | PPAN     | -1.11 | 9.03E-03 | 6.19E-02 | 356.39    | not significant |
| 183 | TOMM40   | -1.11 | 6.79E-06 | 2.45E-04 | 6491.95   | not significant |
| 184 | TBRG4    | -1.11 | 3.67E-06 | 1.48E-04 | 5032.23   | not significant |
| 185 | SSBP1    | -1.11 | 2.15E-04 | 4.01E-03 | 2945.43   | not significant |
| 186 | RRP12    | -1.11 | 5.73E-06 | 2.15E-04 | 3595.24   | not significant |
| 187 | ZMAT3    | -1.11 | 6.39E-05 | 1.51E-03 | 3022.12   | not significant |
| 188 | WDR43    | -1.11 | 1.51E-06 | 6.90E-05 | 4857.82   | not significant |
| 189 | FNDC3B   | -1.11 | 1.09E-02 | 7.06E-02 | 277.60    | not significant |
| 190 | OSM      | -1.11 | 2.42E-06 | 1.02E-04 | 6108.18   | not significant |
| 191 | ARHGAP19 | -1.11 | 1.88E-04 | 3.58E-03 | 1933.54   | not significant |
| 192 | DEPDC1   | -1.11 | 4.75E-04 | 7.37E-03 | 1318.84   | not significant |
| 193 | PSMC1    | -1.11 | 1.68E-03 | 1.87E-02 | 1002.08   | not significant |
| 194 | PRMT5    | -1.11 | 3.32E-06 | 1.36E-04 | 4413.20   | not significant |
| 195 | CHKA     | -1.11 | 2.39E-03 | 2.43E-02 | 895.77    | not significant |
| 196 | NEIL2    | -1.11 | 3.62E-03 | 3.21E-02 | 736.27    | not significant |
| 197 | NUFIP1   | -1.11 | 2.66E-03 | 2.60E-02 | 790.63    | not significant |
| 198 | SAR1A    | -1.11 | 2.94E-06 | 1.22E-04 | 4195.36   | not significant |
| 199 | GPI      | -1.11 | 5.88E-09 | 6.10E-07 | 17056.77  | not significant |
| 200 | DYNLL1   | -1.11 | 6.68E-05 | 1.57E-03 | 4863.47   | not significant |
| 201 | CNOT1    | -1.11 | 1.08E-05 | 3.57E-04 | 15709.31  | not significant |
| 202 | LPHN1    | -1.11 | 7.93E-03 | 5.67E-02 | 428.64    | not significant |
| 203 | WDR74    | -1.11 | 5.59E-04 | 8.31E-03 | 1744.18   | not significant |
| 204 | CNTROB   | -1.11 | 6.45E-05 | 1.52E-03 | 2360.62   | not significant |
| 205 | MAPKAPK3 | -1.11 | 8.03E-07 | 4.00E-05 | 9397.35   | not significant |
| 206 | FAM126B  | -1.11 | 2.25E-04 | 4.15E-03 | 2196.46   | not significant |
| 207 | PMM2     | -1.11 | 1.03E-05 | 3.47E-04 | 3874.90   | not significant |
| 208 | C9orf41  | -1.11 | 3.31E-03 | 3.01E-02 | 751.92    | not significant |
| 209 | ETF1     | -1.11 | 1.77E-07 | 1.10E-05 | 7060.87   | not significant |
| 210 | UCHL5    | -1.11 | 8.55E-06 | 2.93E-04 | 4083.80   | not significant |
| 211 | RHOU     | -1.11 | 3.95E-03 | 3.41E-02 | 694.82    | not significant |
| 212 | TAF4B    | -1.10 | 8.68E-04 | 1.15E-02 | 1455.13   | not significant |
| 213 | GOSR2    | -1.10 | 1.65E-04 | 3.22E-03 | 2060.71   | not significant |
| 214 | H1FO     | -1.10 | 1.26E-02 | 7.80E-02 | 140.21    | not significant |
| 215 | EIF5A    | -1.10 | 4.79E-06 | 1.86E-04 | 16446.39  | not significant |
| 216 | ARRB1    | -1.10 | 2.82E-05 | 7.72E-04 | 3282.20   | not significant |
| 217 | HEATR1   | -1.10 | 1.06E-04 | 2.28E-03 | 5541.29   | not significant |
| 218 | GRWD1    | -1.10 | 7.37E-05 | 1.70E-03 | 3567.34   | not significant |
| 219 | PSMD2    | -1.10 | 1.31E-07 | 8.79E-06 | 9949.55   | not significant |
| 220 | RASGRP3  | -1.10 | 1.39E-02 | 8.40E-02 | 204.49    | not significant |
| 221 | FAM83D   | -1.10 | 4.31E-03 | 3.65E-02 | 802.95    | not significant |
| 222 | IKZF3    | -1.10 | 3.89E-03 | 3.37E-02 | 920.68    | not significant |
| 223 | ATXN1L   | -1.10 | 1.13E-03 | 1.39E-02 | 2305.68   | not significant |
| 224 | ZNHIT6   | -1.10 | 2.91E-04 | 5.12E-03 | 2448.18   | not significant |
| 225 | TRIM25   | -1.10 | 7.04E-06 | 2.53E-04 | 5233.59   | not significant |
| 226 | DPH2     | -1.10 | 1.66E-04 | 3.24E-03 | 2562.35   | not significant |
| 227 | DGCR8    | -1.10 | 1.38E-04 | 2.80E-03 | 2948.32   | not significant |
| 228 | CACUL1   | -1.10 | 7.51E-04 | 1.03E-02 | 1698.05   | not significant |
| 229 | GPAM     | -1.10 | 1.03E-03 | 1.30E-02 | 1568.16   | not significant |
| 230 | RRP36    | -1.10 | 4.15E-04 | 6.58E-03 | 2428.36   | not significant |
| 231 | XPO6     | -1.10 | 5.51E-06 | 2.09E-04 | 6215.68   | not significant |
| 232 | MSL1     | -1.10 | 2.73E-05 | 7.60E-04 | 3665.76   | not significant |
| 233 | RPL23    | -1.10 | 1.10E-04 | 2.33E-03 | 16952.17  | not significant |
| 234 | RBMXL1   | -1.10 | 1.66E-03 | 1.85E-02 | 1171.46   | not significant |
| 235 | SYNCRIP  | -1.10 | 1.12E-07 | 7.70E-06 | 22048.64  | not significant |
| 236 | SERBP1   | -1.10 | 3.72E-08 | 3.12E-06 | 18393.64  | not significant |
| 237 | WDR77    | -1.10 | 4.79E-06 | 1.86E-04 | 4852.68   | not significant |
| 238 | POLR1A   | -1.10 | 1.73E-04 | 3.35E-03 | 4283.02   | not significant |
| 239 | POLR3B   | -1.10 | 1.43E-03 | 1.65E-02 | 1229.37   | not significant |
| 240 | ALMS1    | -1.10 | 2.32E-03 | 2.38E-02 | 2507.73   | not significant |
| 241 | ERCC8    | -1.10 | 5.62E-03 | 4.42E-02 | 708.50    | not significant |
| 242 | CKAP5    | -1.10 | 3.84E-05 | 9.91E-04 | 10159.78  | not significant |
| 243 | RANGAP1  | -1.10 | 1.66E-05 | 5.24E-04 | 7870.82   | not significant |
| 244 | QSER1    | -1.10 | 1.08E-03 | 1.34E-02 | 1835.78   | not significant |
| 245 | SPRTN    | -1.10 | 5.37E-03 | 4.27E-02 | 734.13    | not significant |
| 246 | INTS8    | -1.10 | 4.96E-04 | 7.60E-03 | 1787.69   | not significant |
| 247 | DDIT4    | -1.10 | 3.33E-03 | 3.02E-02 | 1014.84   | not significant |
| 248 | HSP90AA1 | -1.10 | 1.30E-07 | 8.79E-06 | 132378.11 | not significant |
| 249 | KPNA4    | -1.10 | 2.28E-06 | 9.74E-05 | 6625.58   | not significant |
| 250 | ARL6IP1  | -1.10 | 5.34E-06 | 2.05E-04 | 8553.49   | not significant |
| 251 | SEC31A   | -1.10 | 1.98E-05 | 6.05E-04 | 6045.71   | not significant |

|     |              |       |          |          |          |                 |
|-----|--------------|-------|----------|----------|----------|-----------------|
| 252 | BTRC         | -1.10 | 3.19E-03 | 2.94E-02 | 965.26   | not significant |
| 253 | PPP2R5A      | -1.10 | 1.11E-04 | 2.35E-03 | 2657.01  | not significant |
| 254 | PARPB        | -1.10 | 4.43E-04 | 6.94E-03 | 1817.85  | not significant |
| 255 | TDP2         | -1.10 | 3.49E-04 | 5.79E-03 | 2049.10  | not significant |
| 256 | ZNF542P      | -1.10 | 1.11E-03 | 1.37E-02 | 1452.32  | not significant |
| 257 | HSPH1        | -1.10 | 7.05E-08 | 5.15E-06 | 23980.71 | not significant |
| 258 | SVIL-AS1     | -1.10 | 2.52E-03 | 2.51E-02 | 1142.03  | not significant |
| 259 | ZNF28        | -1.10 | 3.86E-03 | 3.36E-02 | 984.12   | not significant |
| 260 | NME1         | -1.10 | 1.54E-03 | 1.76E-02 | 2211.46  | not significant |
| 261 | NRBF2        | -1.10 | 8.03E-03 | 5.72E-02 | 605.20   | not significant |
| 262 | KPNA3        | -1.10 | 9.38E-06 | 3.19E-04 | 4748.53  | not significant |
| 263 | NAA15        | -1.10 | 7.36E-06 | 2.64E-04 | 7627.99  | not significant |
| 264 | MBNL1        | -1.10 | 3.22E-07 | 1.88E-05 | 29697.62 | not significant |
| 265 | PMEPA1       | -1.10 | 3.29E-03 | 3.00E-02 | 1625.48  | not significant |
| 266 | ZNF480       | -1.10 | 1.20E-03 | 1.45E-02 | 1750.27  | not significant |
| 267 | DNAJB1       | -1.10 | 1.04E-05 | 3.48E-04 | 5325.11  | not significant |
| 268 | NSRP1        | -1.10 | 3.61E-03 | 3.21E-02 | 964.88   | not significant |
| 269 | EIF2S1       | -1.10 | 4.73E-06 | 1.86E-04 | 6380.67  | not significant |
| 270 | KLHL18       | -1.10 | 2.28E-03 | 2.35E-02 | 1183.15  | not significant |
| 271 | AGK          | -1.10 | 4.35E-03 | 3.67E-02 | 946.03   | not significant |
| 272 | MYBBP1A      | -1.10 | 7.41E-06 | 2.64E-04 | 7030.80  | not significant |
| 273 | PIK3R3       | -1.10 | 8.02E-04 | 1.09E-02 | 1836.96  | not significant |
| 274 | FAM98A       | -1.10 | 5.65E-04 | 8.36E-03 | 2007.92  | not significant |
| 275 | RGS6         | -1.10 | 1.58E-02 | 9.20E-02 | 239.94   | not significant |
| 276 | ZNF671       | -1.10 | 9.28E-03 | 6.30E-02 | 584.21   | not significant |
| 277 | IPMK         | -1.10 | 8.43E-03 | 5.93E-02 | 611.32   | not significant |
| 278 | TTC1         | -1.09 | 6.14E-04 | 8.82E-03 | 2373.62  | not significant |
| 279 | CDK6         | -1.09 | 1.59E-04 | 3.14E-03 | 57773.41 | not significant |
| 280 | LOC100507600 | -1.09 | 1.15E-04 | 2.41E-03 | 3675.91  | not significant |
| 281 | TRIM35       | -1.09 | 3.46E-04 | 5.75E-03 | 2405.50  | not significant |
| 282 | CHORDC1      | -1.09 | 7.93E-05 | 1.78E-03 | 3590.90  | not significant |
| 283 | KIF3B        | -1.09 | 2.69E-03 | 2.62E-02 | 1302.86  | not significant |
| 284 | C18orf25     | -1.09 | 1.19E-03 | 1.44E-02 | 2059.79  | not significant |
| 285 | STAG1        | -1.09 | 3.96E-04 | 6.38E-03 | 3458.22  | not significant |
| 286 | DHX33        | -1.09 | 2.20E-04 | 4.08E-03 | 3880.25  | not significant |
| 287 | PTP4A1       | -1.09 | 5.37E-06 | 2.05E-04 | 7970.87  | not significant |
| 288 | FAM53C       | -1.09 | 1.62E-03 | 1.82E-02 | 1562.81  | not significant |
| 289 | DYRK2        | -1.09 | 1.13E-03 | 1.39E-02 | 1722.76  | not significant |
| 290 | UBE2K        | -1.09 | 1.88E-05 | 5.80E-04 | 5119.42  | not significant |
| 291 | TRUB1        | -1.09 | 2.45E-03 | 2.47E-02 | 1432.02  | not significant |
| 292 | MAPKAP1      | -1.09 | 4.39E-04 | 6.90E-03 | 2919.22  | not significant |
| 293 | PKP4         | -1.09 | 2.46E-03 | 2.47E-02 | 1567.14  | not significant |
| 294 | ZMAT5        | -1.09 | 8.73E-03 | 6.04E-02 | 725.82   | not significant |
| 295 | SSB          | -1.09 | 2.81E-05 | 7.72E-04 | 5659.96  | not significant |
| 296 | EIF4G2       | -1.09 | 9.31E-08 | 6.67E-06 | 57858.65 | not significant |
| 297 | ABCE1        | -1.09 | 1.30E-06 | 6.18E-05 | 7776.38  | not significant |
| 298 | RSL1D1       | -1.09 | 7.70E-06 | 2.71E-04 | 7847.72  | not significant |
| 299 | NAT10        | -1.09 | 2.75E-06 | 1.16E-04 | 7637.12  | not significant |
| 300 | DDIAS        | -1.09 | 1.51E-03 | 1.72E-02 | 1638.82  | not significant |
| 301 | MBD2         | -1.09 | 1.63E-04 | 3.19E-03 | 3356.80  | not significant |
| 302 | ARMC7        | -1.09 | 4.02E-03 | 3.45E-02 | 1005.99  | not significant |
| 303 | PPP4R2       | -1.09 | 5.76E-04 | 8.46E-03 | 2048.47  | not significant |
| 304 | PTP4A2       | -1.09 | 3.12E-07 | 1.84E-05 | 37127.22 | not significant |
| 305 | OIP5         | -1.09 | 1.35E-02 | 8.19E-02 | 435.20   | not significant |
| 306 | IPO4         | -1.09 | 7.86E-05 | 1.78E-03 | 3741.45  | not significant |
| 307 | CIRH1A       | -1.09 | 3.75E-04 | 6.17E-03 | 2543.93  | not significant |
| 308 | MPHOSPH10    | -1.09 | 8.45E-04 | 1.13E-02 | 2252.42  | not significant |
| 309 | SCEL         | -1.09 | 3.91E-03 | 3.38E-02 | 1117.11  | not significant |
| 310 | CIAPIN1      | -1.09 | 2.10E-03 | 2.18E-02 | 2110.11  | not significant |
| 311 | EIF3B        | -1.09 | 7.77E-06 | 2.73E-04 | 13688.80 | not significant |
| 312 | CCDC85C      | -1.09 | 9.66E-04 | 1.25E-02 | 1858.46  | not significant |
| 313 | ZFP82        | -1.09 | 1.10E-02 | 7.11E-02 | 568.06   | not significant |
| 314 | DEPDC1B      | -1.09 | 1.48E-03 | 1.70E-02 | 1636.97  | not significant |
| 315 | STYX         | -1.09 | 1.08E-03 | 1.34E-02 | 1769.13  | not significant |
| 316 | EIF3J        | -1.09 | 1.60E-04 | 3.14E-03 | 3591.50  | not significant |
| 317 | ABCF2        | -1.09 | 3.87E-05 | 9.95E-04 | 6029.11  | not significant |
| 318 | ARHGEF3      | -1.09 | 7.40E-04 | 1.02E-02 | 2113.12  | not significant |
| 319 | ETS2         | -1.09 | 1.64E-06 | 7.38E-05 | 9275.81  | not significant |
| 320 | ARSB         | -1.09 | 1.64E-03 | 1.83E-02 | 1856.78  | not significant |
| 321 | LRRC59       | -1.09 | 2.01E-06 | 8.79E-05 | 11170.57 | not significant |
| 322 | CCNA2        | -1.09 | 2.64E-05 | 7.46E-04 | 6149.69  | not significant |
| 323 | SLC25A19     | -1.09 | 1.47E-03 | 1.69E-02 | 1892.88  | not significant |
| 324 | DCAF4        | -1.09 | 5.60E-03 | 4.41E-02 | 916.40   | not significant |
| 325 | EIF2B4       | -1.09 | 4.23E-03 | 3.60E-02 | 1023.38  | not significant |
| 326 | ASUN         | -1.09 | 3.94E-04 | 6.38E-03 | 2550.34  | not significant |
| 327 | METTL16      | -1.09 | 2.80E-04 | 4.95E-03 | 2742.19  | not significant |
| 328 | TRAK2        | -1.09 | 2.59E-03 | 2.56E-02 | 1322.89  | not significant |
| 329 | NOC3L        | -1.09 | 8.83E-04 | 1.16E-02 | 2022.84  | not significant |
| 330 | PNPT1        | -1.09 | 4.91E-04 | 7.55E-03 | 2537.67  | not significant |
| 331 | CCT5         | -1.09 | 1.77E-05 | 5.52E-04 | 19602.47 | not significant |
| 332 | KCTD21       | -1.09 | 1.71E-02 | 9.63E-02 | 332.17   | not significant |
| 333 | IARS         | -1.09 | 4.78E-06 | 1.86E-04 | 9483.73  | not significant |
| 334 | DDX49        | -1.09 | 1.71E-03 | 1.88E-02 | 2466.53  | not significant |
| 335 | DPP8         | -1.09 | 3.34E-03 | 3.02E-02 | 1467.89  | not significant |
| 336 | KCTD9        | -1.09 | 9.99E-04 | 1.28E-02 | 2770.60  | not significant |
| 337 | DIEXF        | -1.09 | 2.52E-03 | 2.51E-02 | 1434.68  | not significant |
| 338 | LARP4        | -1.09 | 3.33E-05 | 8.83E-04 | 7384.73  | not significant |
| 339 | ETNK1        | -1.09 | 3.28E-04 | 5.54E-03 | 4567.62  | not significant |

|     |          |       |          |          |          |                 |
|-----|----------|-------|----------|----------|----------|-----------------|
| 340 | MRPL3    | -1.09 | 4.25E-05 | 1.09E-03 | 5518.30  | not significant |
| 341 | DDX56    | -1.09 | 2.38E-04 | 4.36E-03 | 3772.73  | not significant |
| 342 | MBP      | -1.09 | 1.76E-02 | 9.86E-02 | 303.98   | not significant |
| 343 | ATRIP    | -1.09 | 1.21E-02 | 7.58E-02 | 586.53   | not significant |
| 344 | CEP85L   | -1.09 | 1.98E-03 | 2.09E-02 | 2543.72  | not significant |
| 345 | SLC25A44 | -1.09 | 1.59E-03 | 1.79E-02 | 1743.21  | not significant |
| 346 | CCT6A    | -1.09 | 1.06E-06 | 5.14E-05 | 19488.56 | not significant |
| 347 | RSU1     | -1.09 | 4.18E-04 | 6.62E-03 | 2533.14  | not significant |
| 348 | EFTUD2   | -1.09 | 4.12E-06 | 1.65E-04 | 8940.44  | not significant |
| 349 | PLEKHB2  | -1.09 | 5.59E-05 | 1.35E-03 | 5902.07  | not significant |
| 350 | HK2      | -1.09 | 1.49E-03 | 1.70E-02 | 2006.06  | not significant |
| 351 | DNAJC11  | -1.09 | 6.45E-04 | 9.14E-03 | 2631.72  | not significant |
| 352 | ZNF23    | -1.09 | 1.79E-02 | 9.94E-02 | 316.54   | not significant |
| 353 | EIF5A2   | -1.09 | 7.77E-03 | 5.62E-02 | 936.31   | not significant |
| 354 | UTP23    | -1.09 | 6.86E-04 | 9.61E-03 | 2278.62  | not significant |
| 355 | NRF1     | -1.09 | 3.38E-03 | 3.05E-02 | 1264.57  | not significant |
| 356 | MCCC2    | -1.09 | 3.97E-03 | 3.42E-02 | 1397.21  | not significant |
| 357 | FKBP4    | -1.09 | 6.17E-05 | 1.46E-03 | 11331.60 | not significant |
| 358 | CD3EAP   | -1.09 | 4.30E-03 | 3.64E-02 | 1152.41  | not significant |
| 359 | HEXIM1   | -1.09 | 8.83E-04 | 1.16E-02 | 2500.86  | not significant |
| 360 | SRRT     | -1.09 | 4.36E-06 | 1.74E-04 | 9690.36  | not significant |
| 361 | SBDS     | -1.09 | 5.04E-03 | 4.08E-02 | 1122.76  | not significant |
| 362 | RBM27    | -1.09 | 9.16E-04 | 1.20E-02 | 3735.36  | not significant |
| 363 | NFATC3   | -1.09 | 9.96E-05 | 2.16E-03 | 6906.46  | not significant |
| 364 | TOP1     | -1.09 | 8.37E-06 | 2.90E-04 | 10377.10 | not significant |
| 365 | ZNF569   | -1.09 | 7.32E-03 | 5.37E-02 | 856.01   | not significant |
| 366 | HSP90B1  | -1.09 | 4.05E-06 | 1.63E-04 | 26220.11 | not significant |
| 367 | DDX10    | -1.09 | 2.46E-03 | 2.47E-02 | 1784.23  | not significant |
| 368 | NOP14    | -1.09 | 9.03E-05 | 2.00E-03 | 5599.57  | not significant |
| 369 | LIN28B   | -1.09 | 3.29E-04 | 5.54E-03 | 2948.97  | not significant |
| 370 | DUSP3    | -1.09 | 1.49E-02 | 8.82E-02 | 550.35   | not significant |
| 371 | KLHL8    | -1.09 | 2.78E-03 | 2.67E-02 | 1621.42  | not significant |
| 372 | ZCCHC2   | -1.09 | 9.45E-03 | 6.39E-02 | 838.25   | not significant |
| 373 | ZNF207   | -1.09 | 9.46E-06 | 3.20E-04 | 8486.59  | not significant |
| 374 | TNPO1    | -1.09 | 4.43E-05 | 1.12E-03 | 11597.32 | not significant |
| 375 | SKIV2L2  | -1.09 | 3.98E-04 | 6.40E-03 | 3562.11  | not significant |
| 376 | LARP1B   | -1.09 | 8.14E-03 | 5.78E-02 | 867.61   | not significant |
| 377 | PPIF     | -1.09 | 1.18E-04 | 2.46E-03 | 5598.09  | not significant |
| 378 | ACACA    | -1.09 | 7.86E-04 | 1.07E-02 | 4978.44  | not significant |
| 379 | SHOC2    | -1.09 | 1.60E-03 | 1.80E-02 | 1947.10  | not significant |
| 380 | AMPD2    | -1.08 | 6.83E-04 | 9.59E-03 | 2871.74  | not significant |
| 381 | XPO5     | -1.08 | 1.47E-04 | 2.95E-03 | 5864.40  | not significant |
| 382 | COX11    | -1.08 | 3.01E-03 | 2.83E-02 | 2066.09  | not significant |
| 383 | MED13    | -1.08 | 1.71E-03 | 1.88E-02 | 6726.67  | not significant |
| 384 | COX10    | -1.08 | 1.03E-02 | 6.79E-02 | 783.30   | not significant |
| 385 | GPSM2    | -1.08 | 7.73E-03 | 5.60E-02 | 951.29   | not significant |
| 386 | LTV1     | -1.08 | 1.26E-03 | 1.50E-02 | 2468.34  | not significant |
| 387 | ARF3     | -1.08 | 8.42E-06 | 2.90E-04 | 9288.04  | not significant |
| 388 | LRRC58   | -1.08 | 4.36E-04 | 6.87E-03 | 8250.86  | not significant |
| 389 | TTK      | -1.08 | 1.40E-03 | 1.63E-02 | 2362.97  | not significant |
| 390 | ZNFX1    | -1.08 | 1.18E-03 | 1.43E-02 | 2496.36  | not significant |
| 391 | EGLN3    | -1.08 | 1.65E-02 | 9.43E-02 | 470.34   | not significant |
| 392 | NEK2     | -1.08 | 3.22E-03 | 2.96E-02 | 1509.25  | not significant |
| 393 | USP14    | -1.08 | 3.34E-05 | 8.83E-04 | 6388.42  | not significant |
| 394 | PSMD11   | -1.08 | 4.98E-05 | 1.24E-03 | 5581.01  | not significant |
| 395 | COX20    | -1.08 | 4.94E-03 | 4.02E-02 | 1223.68  | not significant |
| 396 | SNX29    | -1.08 | 8.73E-03 | 6.04E-02 | 934.77   | not significant |
| 397 | SOD2     | -1.08 | 2.34E-03 | 2.40E-02 | 1819.44  | not significant |
| 398 | BAG4     | -1.08 | 2.99E-03 | 2.81E-02 | 1512.99  | not significant |
| 399 | YBX1     | -1.08 | 5.71E-04 | 8.40E-03 | 47683.48 | not significant |
| 400 | ZBTB34   | -1.08 | 1.06E-02 | 6.92E-02 | 875.54   | not significant |
| 401 | RRP7A    | -1.08 | 1.41E-04 | 2.84E-03 | 6952.31  | not significant |
| 402 | HIVEP3   | -1.08 | 8.53E-04 | 1.14E-02 | 3649.00  | not significant |
| 403 | SNX2     | -1.08 | 7.02E-03 | 5.22E-02 | 1131.01  | not significant |
| 404 | AAK1     | -1.08 | 6.91E-03 | 5.15E-02 | 2189.27  | not significant |
| 405 | VAPB     | -1.08 | 1.81E-03 | 1.96E-02 | 1949.26  | not significant |
| 406 | ANAPC1   | -1.08 | 1.25E-03 | 1.50E-02 | 2825.02  | not significant |
| 407 | MTMR9    | -1.08 | 7.51E-03 | 5.49E-02 | 1080.55  | not significant |
| 408 | PAICS    | -1.08 | 1.96E-06 | 8.59E-05 | 25461.14 | not significant |
| 409 | KIN      | -1.08 | 1.19E-02 | 7.53E-02 | 747.38   | not significant |
| 410 | ZNF286A  | -1.08 | 8.49E-03 | 5.94E-02 | 921.99   | not significant |
| 411 | ZSCAN5A  | -1.08 | 1.63E-02 | 9.37E-02 | 165.67   | not significant |
| 412 | IMPDH1   | -1.08 | 7.91E-03 | 5.67E-02 | 1048.30  | not significant |
| 413 | GZF1     | -1.08 | 9.76E-03 | 6.54E-02 | 872.15   | not significant |
| 414 | IQSEC1   | -1.08 | 5.30E-03 | 4.23E-02 | 2035.82  | not significant |
| 415 | RASAL1   | -1.08 | 2.47E-03 | 2.48E-02 | 2176.68  | not significant |
| 416 | GABPB1   | -1.08 | 3.31E-03 | 3.01E-02 | 1754.98  | not significant |
| 417 | UBAP2L   | -1.08 | 1.92E-04 | 3.65E-03 | 9216.32  | not significant |
| 418 | CLUH     | -1.08 | 5.90E-05 | 1.41E-03 | 6705.73  | not significant |
| 419 | ATP5J2   | -1.08 | 4.73E-03 | 3.89E-02 | 2260.88  | not significant |
| 420 | EWSR1    | -1.08 | 4.36E-05 | 1.11E-03 | 11230.16 | not significant |
| 421 | CYCS     | -1.08 | 9.87E-05 | 2.15E-03 | 10374.45 | not significant |
| 422 | TRMT10C  | -1.08 | 3.08E-03 | 2.87E-02 | 1943.99  | not significant |
| 423 | SAP130   | -1.08 | 3.21E-03 | 2.96E-02 | 1853.29  | not significant |
| 424 | UBE2L3   | -1.08 | 2.31E-04 | 4.26E-03 | 5264.62  | not significant |
| 425 | PHB      | -1.08 | 1.71E-03 | 1.88E-02 | 8714.40  | not significant |
| 426 | PPP1R8   | -1.08 | 5.87E-04 | 8.57E-03 | 3482.15  | not significant |
| 427 | NOL8     | -1.08 | 2.17E-03 | 2.25E-02 | 1963.46  | not significant |



|     |           |       |          |          |          |                 |
|-----|-----------|-------|----------|----------|----------|-----------------|
| 428 | TCOF1     | -1.08 | 5.83E-05 | 1.40E-03 | 7850.31  | not significant |
| 429 | PSMD12    | -1.08 | 5.70E-04 | 8.40E-03 | 3585.66  | not significant |
| 430 | WDR46     | -1.08 | 6.68E-03 | 5.03E-02 | 1303.71  | not significant |
| 431 | TAF15     | -1.08 | 3.52E-04 | 5.81E-03 | 4361.89  | not significant |
| 432 | CALM1     | -1.08 | 2.65E-05 | 7.46E-04 | 7843.77  | not significant |
| 433 | POP1      | -1.08 | 4.22E-03 | 3.60E-02 | 1678.82  | not significant |
| 434 | SEC24A    | -1.08 | 2.76E-03 | 2.66E-02 | 2234.42  | not significant |
| 435 | FAM136A   | -1.08 | 8.89E-04 | 1.17E-02 | 4292.39  | not significant |
| 436 | PPAT      | -1.08 | 6.02E-04 | 8.71E-03 | 3672.49  | not significant |
| 437 | PEA15     | -1.08 | 7.45E-03 | 5.45E-02 | 1557.40  | not significant |
| 438 | ARPC5L    | -1.08 | 4.13E-03 | 3.54E-02 | 2025.35  | not significant |
| 439 | OTUD6B    | -1.08 | 1.90E-03 | 2.04E-02 | 2076.64  | not significant |
| 440 | PPRC1     | -1.08 | 1.56E-03 | 1.78E-02 | 3753.14  | not significant |
| 441 | ARIH1     | -1.08 | 1.08E-03 | 1.34E-02 | 2946.27  | not significant |
| 442 | WDR3      | -1.08 | 2.59E-04 | 4.65E-03 | 4028.09  | not significant |
| 443 | HDLBP     | -1.08 | 3.07E-04 | 5.30E-03 | 6532.70  | not significant |
| 444 | E2F5      | -1.08 | 1.98E-02 | 1.06E-01 | 667.85   | not significant |
| 445 | RC3H1     | -1.08 | 3.41E-03 | 3.07E-02 | 1769.29  | not significant |
| 446 | GSPT1     | -1.08 | 2.11E-05 | 6.31E-04 | 9760.60  | not significant |
| 447 | SLC7A6    | -1.08 | 4.45E-03 | 3.73E-02 | 2795.92  | not significant |
| 448 | STRAP     | -1.08 | 2.46E-04 | 4.48E-03 | 6537.00  | not significant |
| 449 | GIPC1     | -1.08 | 6.43E-03 | 4.87E-02 | 1383.37  | not significant |
| 450 | EDC3      | -1.08 | 3.62E-03 | 3.21E-02 | 1598.21  | not significant |
| 451 | ZMYM4     | -1.08 | 1.23E-03 | 1.48E-02 | 3793.29  | not significant |
| 452 | INO80     | -1.08 | 1.93E-03 | 2.07E-02 | 2221.49  | not significant |
| 453 | UBE3C     | -1.08 | 5.83E-04 | 8.55E-03 | 4284.51  | not significant |
| 454 | DBF4      | -1.08 | 7.28E-04 | 1.01E-02 | 3102.93  | not significant |
| 455 | ZNF117    | -1.08 | 1.55E-02 | 9.09E-02 | 1030.19  | not significant |
| 456 | PROSER1   | -1.08 | 1.08E-03 | 1.34E-02 | 4979.43  | not significant |
| 457 | NCOA1     | -1.08 | 2.88E-03 | 2.74E-02 | 2944.90  | not significant |
| 458 | FARSA     | -1.08 | 1.46E-04 | 2.94E-03 | 5985.54  | not significant |
| 459 | NOP58     | -1.08 | 1.73E-04 | 3.35E-03 | 6497.12  | not significant |
| 460 | TARDBP    | -1.08 | 3.09E-05 | 8.30E-04 | 9865.67  | not significant |
| 461 | KARS      | -1.08 | 9.99E-05 | 2.16E-03 | 10790.66 | not significant |
| 462 | CCDC59    | -1.08 | 2.63E-03 | 2.58E-02 | 2051.56  | not significant |
| 463 | NOP2      | -1.08 | 3.96E-04 | 6.38E-03 | 4232.45  | not significant |
| 464 | UBFD1     | -1.08 | 3.38E-04 | 5.66E-03 | 4095.06  | not significant |
| 465 | SLC27A4   | -1.08 | 7.17E-03 | 5.29E-02 | 1282.63  | not significant |
| 466 | ATF4      | -1.08 | 3.90E-04 | 6.34E-03 | 19035.48 | not significant |
| 467 | SLC25A12  | -1.08 | 5.36E-03 | 4.26E-02 | 1602.14  | not significant |
| 468 | GLRX3     | -1.08 | 3.85E-03 | 3.35E-02 | 3233.39  | not significant |
| 469 | KPNB1     | -1.08 | 9.87E-06 | 3.32E-04 | 26241.38 | not significant |
| 470 | GOT2      | -1.08 | 1.95E-05 | 6.01E-04 | 9049.79  | not significant |
| 471 | PES1      | -1.08 | 8.67E-04 | 1.15E-02 | 4487.75  | not significant |
| 472 | CBWD1     | -1.08 | 2.26E-02 | 1.17E-01 | 373.39   | not significant |
| 473 | SRFBP1    | -1.08 | 1.20E-02 | 7.55E-02 | 871.85   | not significant |
| 474 | CCDC157   | -1.08 | 1.97E-02 | 1.05E-01 | 197.63   | not significant |
| 475 | TGFBP1    | -1.08 | 3.27E-03 | 2.99E-02 | 1895.48  | not significant |
| 476 | FAM208B   | -1.08 | 4.07E-03 | 3.49E-02 | 4522.28  | not significant |
| 477 | CHUK      | -1.08 | 2.42E-03 | 2.46E-02 | 2793.10  | not significant |
| 478 | DPP9      | -1.08 | 4.15E-04 | 6.58E-03 | 4043.84  | not significant |
| 479 | CRLS1     | -1.08 | 4.24E-03 | 3.60E-02 | 2239.09  | not significant |
| 480 | API5      | -1.08 | 7.60E-05 | 1.73E-03 | 7561.31  | not significant |
| 481 | XPOT      | -1.08 | 1.65E-05 | 5.24E-04 | 11123.04 | not significant |
| 482 | CDC123    | -1.08 | 5.94E-04 | 8.65E-03 | 4940.40  | not significant |
| 483 | DHX37     | -1.08 | 2.09E-04 | 3.92E-03 | 5219.77  | not significant |
| 484 | APOOL     | -1.08 | 1.20E-02 | 7.57E-02 | 872.24   | not significant |
| 485 | TRIAP1    | -1.08 | 7.71E-03 | 5.59E-02 | 1899.63  | not significant |
| 486 | E2F4      | -1.08 | 2.08E-04 | 3.90E-03 | 6401.29  | not significant |
| 487 | PGAM1     | -1.08 | 1.65E-03 | 1.85E-02 | 2947.76  | not significant |
| 488 | CCT2      | -1.08 | 9.02E-05 | 2.00E-03 | 17477.63 | not significant |
| 489 | SORD      | -1.08 | 9.30E-03 | 6.31E-02 | 1112.70  | not significant |
| 490 | FAM175B   | -1.08 | 7.61E-03 | 5.54E-02 | 1335.68  | not significant |
| 491 | DHX9      | -1.08 | 7.45E-06 | 2.65E-04 | 20862.63 | not significant |
| 492 | GAR1      | -1.08 | 9.37E-03 | 6.35E-02 | 2394.70  | not significant |
| 493 | TSR1      | -1.08 | 2.72E-04 | 4.84E-03 | 4701.91  | not significant |
| 494 | PFKFB3    | -1.08 | 8.50E-03 | 5.94E-02 | 1238.39  | not significant |
| 495 | PA2G4     | -1.08 | 2.25E-05 | 6.67E-04 | 23801.58 | not significant |
| 496 | DTWD2     | -1.08 | 2.04E-02 | 1.08E-01 | 576.77   | not significant |
| 497 | C15orf39  | -1.08 | 2.82E-03 | 2.70E-02 | 1977.41  | not significant |
| 498 | POFUT1    | -1.08 | 1.03E-03 | 1.30E-02 | 3867.87  | not significant |
| 499 | PITPNB    | -1.08 | 6.33E-03 | 4.82E-02 | 1528.81  | not significant |
| 500 | DNAJC2    | -1.08 | 4.41E-03 | 3.71E-02 | 2303.46  | not significant |
| 501 | ANKRD13C  | -1.08 | 8.48E-03 | 5.94E-02 | 1216.02  | not significant |
| 502 | NDUFA12   | -1.08 | 3.11E-03 | 2.89E-02 | 3005.03  | not significant |
| 503 | LARP4B    | -1.08 | 3.76E-04 | 6.18E-03 | 5457.97  | not significant |
| 504 | TNFAIP8L1 | -1.08 | 2.40E-02 | 1.21E-01 | 371.62   | not significant |
| 505 | LYRM7     | -1.08 | 1.62E-03 | 1.82E-02 | 2778.00  | not significant |
| 506 | SNX11     | -1.08 | 1.98E-02 | 1.06E-01 | 725.86   | not significant |
| 507 | C1orf131  | -1.08 | 1.33E-02 | 8.14E-02 | 1052.12  | not significant |
| 508 | TGS1      | -1.08 | 9.77E-04 | 1.26E-02 | 3104.82  | not significant |
| 509 | NUP93     | -1.08 | 1.07E-03 | 1.34E-02 | 4099.77  | not significant |
| 510 | NCOA5     | -1.08 | 1.05E-03 | 1.31E-02 | 4321.65  | not significant |
| 511 | SNRNP48   | -1.08 | 8.16E-04 | 1.10E-02 | 3933.93  | not significant |
| 512 | MRT04     | -1.08 | 1.57E-03 | 1.78E-02 | 5262.39  | not significant |
| 513 | SHQ1      | -1.08 | 7.36E-04 | 1.02E-02 | 4270.72  | not significant |
| 514 | IPP       | -1.08 | 2.30E-02 | 1.18E-01 | 470.00   | not significant |
| 515 | MRPL17    | -1.08 | 5.73E-03 | 4.49E-02 | 2178.73  | not significant |

|     |           |       |          |          |          |                 |
|-----|-----------|-------|----------|----------|----------|-----------------|
| 516 | ZNF267    | -1.08 | 1.68E-02 | 9.56E-02 | 846.51   | not significant |
| 517 | TRIP13    | -1.08 | 1.88E-03 | 2.02E-02 | 2625.91  | not significant |
| 518 | RACGAP1   | -1.08 | 3.18E-04 | 5.41E-03 | 5440.05  | not significant |
| 519 | GNL3L     | -1.07 | 2.89E-03 | 2.74E-02 | 2489.82  | not significant |
| 520 | ASPM      | -1.07 | 2.64E-02 | 1.29E-01 | 5947.86  | not significant |
| 521 | EAF1      | -1.07 | 2.51E-03 | 2.51E-02 | 2355.97  | not significant |
| 522 | ZNF343    | -1.07 | 1.91E-02 | 1.04E-01 | 700.40   | not significant |
| 523 | SRF       | -1.07 | 1.87E-03 | 2.02E-02 | 3297.27  | not significant |
| 524 | RAB10     | -1.07 | 1.19E-04 | 2.47E-03 | 7294.15  | not significant |
| 525 | TIMM21    | -1.07 | 8.50E-03 | 5.94E-02 | 1286.89  | not significant |
| 526 | TACC1     | -1.07 | 2.05E-03 | 2.15E-02 | 8973.71  | not significant |
| 527 | CRK       | -1.07 | 1.37E-02 | 8.30E-02 | 947.85   | not significant |
| 528 | IPO11     | -1.07 | 1.45E-02 | 8.63E-02 | 983.05   | not significant |
| 529 | FADD      | -1.07 | 9.66E-03 | 6.51E-02 | 1331.21  | not significant |
| 530 | NSUN2     | -1.07 | 2.56E-04 | 4.62E-03 | 6271.67  | not significant |
| 531 | PPP6R3    | -1.07 | 5.97E-04 | 8.68E-03 | 5527.02  | not significant |
| 532 | AK2       | -1.07 | 9.32E-05 | 2.05E-03 | 10493.04 | not significant |
| 533 | METTL13   | -1.07 | 2.81E-03 | 2.69E-02 | 2738.50  | not significant |
| 534 | PUS1      | -1.07 | 3.76E-03 | 3.28E-02 | 2624.97  | not significant |
| 535 | ZNF148    | -1.07 | 2.45E-03 | 2.47E-02 | 2634.77  | not significant |
| 536 | EIF5B     | -1.07 | 4.19E-04 | 6.62E-03 | 7503.90  | not significant |
| 537 | DDI2      | -1.07 | 2.46E-02 | 1.24E-01 | 569.02   | not significant |
| 538 | WDR12     | -1.07 | 5.29E-03 | 4.22E-02 | 2316.13  | not significant |
| 539 | TRUB2     | -1.07 | 1.33E-02 | 8.12E-02 | 1240.72  | not significant |
| 540 | PLEKHF1   | -1.07 | 1.06E-02 | 6.92E-02 | 1233.43  | not significant |
| 541 | RRS1      | -1.07 | 3.73E-03 | 3.27E-02 | 3016.62  | not significant |
| 542 | RRN3      | -1.07 | 2.54E-03 | 2.52E-02 | 2517.65  | not significant |
| 543 | EIF4A3    | -1.07 | 7.07E-04 | 9.87E-03 | 6864.09  | not significant |
| 544 | TNPO3     | -1.07 | 4.68E-04 | 7.29E-03 | 6271.54  | not significant |
| 545 | WASF1     | -1.07 | 5.11E-03 | 4.11E-02 | 1754.44  | not significant |
| 546 | MAP3K2    | -1.07 | 4.77E-03 | 3.91E-02 | 2536.83  | not significant |
| 547 | ELMOD2    | -1.07 | 5.66E-03 | 4.45E-02 | 1656.98  | not significant |
| 548 | SNRPD3    | -1.07 | 3.10E-04 | 5.33E-03 | 7403.28  | not significant |
| 549 | SLC19A2   | -1.07 | 2.22E-02 | 1.15E-01 | 633.21   | not significant |
| 550 | AFF3      | -1.07 | 1.24E-02 | 7.73E-02 | 1317.49  | not significant |
| 551 | EIF4G1    | -1.07 | 5.01E-05 | 1.24E-03 | 25806.46 | not significant |
| 552 | PPP2CA    | -1.07 | 4.58E-04 | 7.16E-03 | 11719.25 | not significant |
| 553 | ARHGD1A   | -1.07 | 4.11E-04 | 6.55E-03 | 27613.93 | not significant |
| 554 | TOB2      | -1.07 | 7.91E-03 | 5.67E-02 | 1482.36  | not significant |
| 555 | KIF2C     | -1.07 | 1.17E-03 | 1.42E-02 | 3758.95  | not significant |
| 556 | EIF4ENIF1 | -1.07 | 8.79E-03 | 6.07E-02 | 1394.00  | not significant |
| 557 | PPP1CC    | -1.07 | 1.28E-04 | 2.62E-03 | 9564.27  | not significant |
| 558 | PRR14L    | -1.07 | 1.12E-02 | 7.21E-02 | 2478.14  | not significant |
| 559 | ZNF271    | -1.07 | 7.11E-03 | 5.26E-02 | 1589.79  | not significant |
| 560 | CCRN4L    | -1.07 | 2.57E-02 | 1.27E-01 | 324.28   | not significant |
| 561 | DNAJA1    | -1.07 | 2.07E-04 | 3.89E-03 | 14616.57 | not significant |
| 562 | ZC3H8     | -1.07 | 7.53E-03 | 5.50E-02 | 1571.57  | not significant |
| 563 | NPTN      | -1.07 | 9.85E-03 | 6.57E-02 | 1353.86  | not significant |
| 564 | PSMF1     | -1.07 | 2.50E-04 | 4.54E-03 | 7427.04  | not significant |
| 565 | PPP2R5E   | -1.07 | 2.70E-03 | 2.62E-02 | 3256.40  | not significant |
| 566 | TARS      | -1.07 | 1.92E-04 | 3.65E-03 | 8518.12  | not significant |
| 567 | WDR89     | -1.07 | 1.13E-02 | 7.22E-02 | 1297.29  | not significant |
| 568 | MAP2K4    | -1.07 | 5.87E-03 | 4.57E-02 | 1775.12  | not significant |
| 569 | ATP5B     | -1.07 | 3.17E-04 | 5.40E-03 | 39110.47 | not significant |
| 570 | CEP70     | -1.07 | 1.09E-02 | 7.08E-02 | 1462.61  | not significant |
| 571 | EIF2AK2   | -1.07 | 6.33E-03 | 4.82E-02 | 3366.36  | not significant |
| 572 | SMC4      | -1.07 | 4.78E-04 | 7.40E-03 | 12717.90 | not significant |
| 573 | GNL3      | -1.07 | 2.88E-04 | 5.07E-03 | 6061.99  | not significant |
| 574 | MTHFD1L   | -1.07 | 2.05E-03 | 2.15E-02 | 3098.19  | not significant |
| 575 | ILF2      | -1.07 | 8.75E-04 | 1.15E-02 | 17947.22 | not significant |
| 576 | ANKRD40   | -1.07 | 1.60E-03 | 1.80E-02 | 3248.43  | not significant |
| 577 | SLA2      | -1.07 | 1.81E-03 | 1.96E-02 | 4951.17  | not significant |
| 578 | TAF3      | -1.07 | 8.50E-03 | 5.94E-02 | 1665.55  | not significant |
| 579 | TFAM      | -1.07 | 1.29E-03 | 1.53E-02 | 4222.00  | not significant |
| 580 | YKT6      | -1.07 | 5.94E-04 | 8.65E-03 | 5260.58  | not significant |
| 581 | PPP1R10   | -1.07 | 1.63E-02 | 9.37E-02 | 901.94   | not significant |
| 582 | CALM2     | -1.07 | 7.36E-04 | 1.02E-02 | 18340.79 | not significant |
| 583 | TPM3      | -1.07 | 7.19E-05 | 1.66E-03 | 32376.64 | not significant |
| 584 | MAD2L1BP  | -1.07 | 2.35E-02 | 1.20E-01 | 727.81   | not significant |
| 585 | PUS7      | -1.07 | 4.22E-03 | 3.60E-02 | 2220.75  | not significant |
| 586 | PGAM5     | -1.07 | 3.05E-04 | 5.28E-03 | 5812.84  | not significant |
| 587 | LAS1L     | -1.07 | 3.04E-03 | 2.85E-02 | 2659.98  | not significant |
| 588 | PPP2R5D   | -1.07 | 2.36E-03 | 2.41E-02 | 3560.77  | not significant |
| 589 | COG8      | -1.07 | 2.50E-02 | 1.25E-01 | 567.12   | not significant |
| 590 | PDLIM5    | -1.07 | 1.54E-02 | 9.05E-02 | 1053.11  | not significant |
| 591 | EIF2S2    | -1.07 | 9.38E-04 | 1.22E-02 | 7242.18  | not significant |
| 592 | RCC1      | -1.07 | 9.33E-04 | 1.21E-02 | 5751.59  | not significant |
| 593 | KCTD5     | -1.07 | 7.18E-03 | 5.29E-02 | 1856.02  | not significant |
| 594 | ZNF398    | -1.07 | 1.69E-02 | 9.57E-02 | 965.47   | not significant |
| 595 | DDX52     | -1.07 | 4.83E-03 | 3.95E-02 | 2189.21  | not significant |
| 596 | STIP1     | -1.07 | 4.43E-05 | 1.12E-03 | 15838.33 | not significant |
| 597 | UTP15     | -1.07 | 1.07E-02 | 6.98E-02 | 1404.30  | not significant |
| 598 | DDX1      | -1.07 | 1.31E-03 | 1.56E-02 | 4534.42  | not significant |
| 599 | RPRD1B    | -1.07 | 1.96E-03 | 2.08E-02 | 3382.67  | not significant |
| 600 | DHX15     | -1.07 | 7.18E-05 | 1.66E-03 | 13020.48 | not significant |
| 601 | NIFK      | -1.07 | 3.61E-03 | 3.21E-02 | 2869.51  | not significant |
| 602 | POLDIP2   | -1.07 | 1.05E-02 | 6.88E-02 | 1535.10  | not significant |
| 603 | SLK       | -1.07 | 3.62E-03 | 3.21E-02 | 3357.07  | not significant |

|     |           |       |          |          |           |                 |
|-----|-----------|-------|----------|----------|-----------|-----------------|
| 604 | CUL3      | -1.07 | 1.07E-03 | 1.34E-02 | 3952.25   | not significant |
| 605 | LSP1      | -1.07 | 1.78E-03 | 1.94E-02 | 3818.91   | not significant |
| 606 | PAFAH1B1  | -1.07 | 2.63E-04 | 4.70E-03 | 7358.81   | not significant |
| 607 | FBXL18    | -1.07 | 1.27E-02 | 7.85E-02 | 1246.51   | not significant |
| 608 | MDM2      | -1.07 | 6.40E-04 | 9.11E-03 | 6259.07   | not significant |
| 609 | RRAS2     | -1.07 | 2.31E-02 | 1.19E-01 | 669.38    | not significant |
| 610 | TAF5L     | -1.07 | 4.32E-03 | 3.65E-02 | 2252.65   | not significant |
| 611 | UBA1      | -1.07 | 3.17E-04 | 5.40E-03 | 6792.60   | not significant |
| 612 | KPNA6     | -1.07 | 2.01E-03 | 2.12E-02 | 3362.04   | not significant |
| 613 | MTIF2     | -1.07 | 2.03E-02 | 1.08E-01 | 830.25    | not significant |
| 614 | RBM14     | -1.07 | 1.13E-03 | 1.39E-02 | 5160.87   | not significant |
| 615 | BCLAF1    | -1.07 | 6.94E-04 | 9.70E-03 | 12305.84  | not significant |
| 616 | DCTN5     | -1.07 | 1.10E-03 | 1.36E-02 | 4805.02   | not significant |
| 617 | G2E3      | -1.07 | 1.43E-02 | 8.54E-02 | 1271.55   | not significant |
| 618 | CSE1L     | -1.07 | 2.58E-04 | 4.63E-03 | 9562.44   | not significant |
| 619 | ZHX3      | -1.07 | 1.90E-02 | 1.03E-01 | 1116.10   | not significant |
| 620 | AHSA1     | -1.07 | 1.34E-03 | 1.58E-02 | 8871.65   | not significant |
| 621 | FLT3LG    | -1.07 | 2.45E-02 | 1.23E-01 | 646.57    | not significant |
| 622 | CDC27     | -1.07 | 1.08E-03 | 1.34E-02 | 4231.70   | not significant |
| 623 | ZNF468    | -1.07 | 1.63E-02 | 9.37E-02 | 1018.24   | not significant |
| 624 | JMJD6     | -1.07 | 1.09E-02 | 7.06E-02 | 1412.58   | not significant |
| 625 | AURKB     | -1.07 | 5.91E-03 | 4.59E-02 | 3108.90   | not significant |
| 626 | MED1      | -1.07 | 5.06E-03 | 4.09E-02 | 7599.71   | not significant |
| 627 | WDR7      | -1.07 | 8.95E-03 | 6.16E-02 | 1991.47   | not significant |
| 628 | FAM35A    | -1.07 | 1.13E-02 | 7.22E-02 | 1484.26   | not significant |
| 629 | DBF4B     | -1.07 | 1.29E-02 | 7.97E-02 | 1348.39   | not significant |
| 630 | NUDC      | -1.07 | 2.63E-03 | 2.58E-02 | 8556.83   | not significant |
| 631 | ZNF350    | -1.07 | 2.65E-02 | 1.29E-01 | 231.31    | not significant |
| 632 | SPRYD3    | -1.07 | 2.09E-02 | 1.10E-01 | 861.47    | not significant |
| 633 | POLR2C    | -1.07 | 3.57E-03 | 3.18E-02 | 4251.45   | not significant |
| 634 | TOR1AIP2  | -1.07 | 7.06E-03 | 5.24E-02 | 2035.30   | not significant |
| 635 | FBXW2     | -1.07 | 4.61E-03 | 3.83E-02 | 2846.34   | not significant |
| 636 | MRPL19    | -1.07 | 3.54E-03 | 3.17E-02 | 2686.36   | not significant |
| 637 | ENO1      | -1.07 | 1.27E-03 | 1.51E-02 | 107675.50 | not significant |
| 638 | USP10     | -1.07 | 1.05E-03 | 1.32E-02 | 4303.36   | not significant |
| 639 | SBDSP1    | -1.07 | 2.96E-02 | 1.39E-01 | 327.28    | not significant |
| 640 | FAM172A   | -1.07 | 1.55E-02 | 9.07E-02 | 1218.41   | not significant |
| 641 | MARS      | -1.07 | 1.25E-04 | 2.58E-03 | 12505.90  | not significant |
| 642 | BORA      | -1.07 | 1.52E-02 | 8.96E-02 | 1142.73   | not significant |
| 643 | UBP1      | -1.07 | 1.24E-03 | 1.49E-02 | 4172.95   | not significant |
| 644 | GTF2A1    | -1.07 | 9.60E-04 | 1.24E-02 | 4705.09   | not significant |
| 645 | RPAP3     | -1.07 | 2.84E-03 | 2.71E-02 | 3098.08   | not significant |
| 646 | SEPHS2    | -1.07 | 3.71E-03 | 3.26E-02 | 3078.10   | not significant |
| 647 | TRIT1     | -1.07 | 1.80E-02 | 9.99E-02 | 1117.18   | not significant |
| 648 | SUV39H2   | -1.07 | 1.26E-02 | 7.81E-02 | 1706.47   | not significant |
| 649 | WWP1      | -1.07 | 9.09E-03 | 6.21E-02 | 1735.23   | not significant |
| 650 | VPS53     | -1.07 | 7.20E-03 | 5.30E-02 | 1818.87   | not significant |
| 651 | SMG7      | -1.07 | 1.74E-03 | 1.91E-02 | 6425.68   | not significant |
| 652 | TEX2      | -1.07 | 1.10E-02 | 7.10E-02 | 1662.79   | not significant |
| 653 | RAB11FIP2 | -1.07 | 1.48E-02 | 8.77E-02 | 1218.56   | not significant |
| 654 | MARK3     | -1.07 | 6.24E-03 | 4.78E-02 | 2499.87   | not significant |
| 655 | KNSTRN    | -1.07 | 1.66E-02 | 9.50E-02 | 1113.53   | not significant |
| 656 | EYA3      | -1.07 | 1.13E-02 | 7.22E-02 | 1752.92   | not significant |
| 657 | ZNF551    | -1.07 | 1.83E-02 | 1.01E-01 | 1280.64   | not significant |
| 658 | PSMC2     | -1.07 | 1.37E-03 | 1.60E-02 | 5096.78   | not significant |
| 659 | CHD1      | -1.07 | 3.59E-03 | 3.20E-02 | 4456.25   | not significant |
| 660 | NOP56     | -1.07 | 4.81E-05 | 1.20E-03 | 15971.29  | not significant |
| 661 | ASB6      | -1.07 | 1.82E-02 | 1.00E-01 | 1071.01   | not significant |
| 662 | AMMECR1L  | -1.07 | 8.26E-03 | 5.84E-02 | 1860.69   | not significant |
| 663 | BYSL      | -1.07 | 4.66E-03 | 3.85E-02 | 2771.78   | not significant |
| 664 | NCBP2     | -1.07 | 9.98E-04 | 1.28E-02 | 6095.32   | not significant |
| 665 | C12orf66  | -1.07 | 3.10E-02 | 1.43E-01 | 445.94    | not significant |
| 666 | CBX6      | -1.07 | 7.52E-03 | 5.49E-02 | 2287.05   | not significant |
| 667 | PTPN11    | -1.07 | 1.04E-03 | 1.31E-02 | 12519.58  | not significant |
| 668 | MRPL51    | -1.07 | 1.23E-02 | 7.67E-02 | 3352.05   | not significant |
| 669 | RSBN1L    | -1.07 | 1.27E-02 | 7.86E-02 | 1428.53   | not significant |
| 670 | SEN5      | -1.07 | 7.08E-03 | 5.24E-02 | 2492.35   | not significant |
| 671 | ALKBH8    | -1.07 | 2.28E-02 | 1.18E-01 | 866.34    | not significant |
| 672 | ARHGEF6   | -1.07 | 1.08E-03 | 1.34E-02 | 8877.78   | not significant |
| 673 | RRP15     | -1.07 | 8.45E-03 | 5.94E-02 | 1792.64   | not significant |
| 674 | PPP2R4    | -1.07 | 4.52E-03 | 3.77E-02 | 3919.31   | not significant |
| 675 | KIF5B     | -1.07 | 1.03E-03 | 1.30E-02 | 8318.38   | not significant |
| 676 | ANAPC10   | -1.07 | 2.94E-02 | 1.38E-01 | 637.00    | not significant |
| 677 | LETM1     | -1.07 | 1.08E-03 | 1.34E-02 | 4914.76   | not significant |
| 678 | POLR3A    | -1.07 | 6.72E-03 | 5.04E-02 | 2735.11   | not significant |
| 679 | URB2      | -1.07 | 3.64E-03 | 3.22E-02 | 3217.77   | not significant |
| 680 | RLF       | -1.07 | 1.71E-02 | 9.63E-02 | 1200.92   | not significant |
| 681 | PRPF4     | -1.07 | 3.91E-03 | 3.38E-02 | 2948.17   | not significant |
| 682 | TRIP12    | -1.07 | 4.64E-03 | 3.84E-02 | 8775.33   | not significant |
| 683 | PDHA1     | -1.07 | 4.92E-03 | 4.00E-02 | 3739.89   | not significant |
| 684 | RQCCD1    | -1.07 | 1.57E-03 | 1.78E-02 | 5722.18   | not significant |
| 685 | CABIN1    | -1.07 | 2.45E-03 | 2.47E-02 | 4117.98   | not significant |
| 686 | UBC       | -1.07 | 5.63E-04 | 8.34E-03 | 11633.27  | not significant |
| 687 | RNF11     | -1.07 | 1.00E-02 | 6.64E-02 | 2102.65   | not significant |
| 688 | DYNC1L1   | -1.07 | 8.25E-03 | 5.83E-02 | 2139.90   | not significant |
| 689 | TBL1XR1   | -1.07 | 5.06E-04 | 7.73E-03 | 7267.29   | not significant |
| 690 | C7orf31   | -1.07 | 3.29E-02 | 1.48E-01 | 453.46    | not significant |
| 691 | BAIAP2    | -1.07 | 3.13E-02 | 1.44E-01 | 504.62    | not significant |

|     |              |       |          |          |          |                 |
|-----|--------------|-------|----------|----------|----------|-----------------|
| 692 | CENPL        | -1.07 | 1.88E-02 | 1.03E-01 | 1040.75  | not significant |
| 693 | POLR2B       | -1.07 | 6.58E-04 | 9.32E-03 | 7700.52  | not significant |
| 694 | SMAD5        | -1.07 | 3.20E-02 | 1.46E-01 | 494.42   | not significant |
| 695 | GOSR1        | -1.07 | 8.62E-03 | 6.01E-02 | 1963.20  | not significant |
| 696 | PRKACA       | -1.07 | 8.01E-03 | 5.71E-02 | 3509.63  | not significant |
| 697 | GNL2         | -1.07 | 6.81E-03 | 5.09E-02 | 2580.62  | not significant |
| 698 | NRBP1        | -1.07 | 5.15E-03 | 4.13E-02 | 2463.57  | not significant |
| 699 | DDX46        | -1.07 | 2.91E-03 | 2.76E-02 | 5982.80  | not significant |
| 700 | SSH3         | -1.07 | 1.64E-02 | 9.39E-02 | 131.64   | not significant |
| 701 | TIMM23       | -1.07 | 2.20E-02 | 1.15E-01 | 182.83   | not significant |
| 702 | RHOBTB2      | -1.07 | 2.61E-02 | 1.28E-01 | 210.63   | not significant |
| 703 | RNASEH1      | -1.07 | 1.12E-02 | 7.21E-02 | 1681.92  | not significant |
| 704 | PAPD5        | -1.07 | 1.81E-02 | 1.00E-01 | 1175.96  | not significant |
| 705 | SPTY2D1      | -1.07 | 7.80E-03 | 5.63E-02 | 2051.92  | not significant |
| 706 | POLR2D       | -1.07 | 2.58E-03 | 2.55E-02 | 4010.82  | not significant |
| 707 | PRPF8        | -1.07 | 4.46E-03 | 3.73E-02 | 24672.30 | not significant |
| 708 | SMU1         | -1.07 | 2.38E-03 | 2.43E-02 | 3794.09  | not significant |
| 709 | ID2          | -1.07 | 2.48E-02 | 1.24E-01 | 189.39   | not significant |
| 710 | ZDHHC3       | -1.07 | 8.48E-03 | 5.94E-02 | 2589.89  | not significant |
| 711 | NUS1         | -1.07 | 5.70E-03 | 4.48E-02 | 2450.45  | not significant |
| 712 | UTP20        | -1.07 | 5.57E-03 | 4.39E-02 | 5303.57  | not significant |
| 713 | PSMC5        | -1.07 | 1.36E-03 | 1.59E-02 | 8608.39  | not significant |
| 714 | YARS         | -1.07 | 7.13E-04 | 9.93E-03 | 11744.72 | not significant |
| 715 | ANKS1A       | -1.06 | 2.83E-02 | 1.35E-01 | 844.74   | not significant |
| 716 | ALDH1B1      | -1.06 | 2.74E-02 | 1.32E-01 | 204.39   | not significant |
| 717 | SUPT5H       | -1.06 | 1.33E-03 | 1.57E-02 | 4823.77  | not significant |
| 718 | LSM1         | -1.06 | 1.24E-02 | 7.74E-02 | 2237.45  | not significant |
| 719 | RARS         | -1.06 | 7.15E-03 | 5.28E-02 | 2698.85  | not significant |
| 720 | UCLL3        | -1.06 | 2.38E-02 | 1.21E-01 | 1209.97  | not significant |
| 721 | HMOX2        | -1.06 | 1.79E-02 | 9.94E-02 | 1698.09  | not significant |
| 722 | PSMC3        | -1.06 | 3.54E-03 | 3.17E-02 | 8049.65  | not significant |
| 723 | DENR         | -1.06 | 1.81E-03 | 1.96E-02 | 9641.37  | not significant |
| 724 | KIF11        | -1.06 | 6.75E-04 | 9.49E-03 | 7726.31  | not significant |
| 725 | UBE2G1       | -1.06 | 2.83E-03 | 2.71E-02 | 3789.35  | not significant |
| 726 | LOC100506844 | -1.06 | 2.64E-02 | 1.29E-01 | 1191.86  | not significant |
| 727 | TCP1         | -1.06 | 5.04E-04 | 7.72E-03 | 18865.75 | not significant |
| 728 | NSA2         | -1.06 | 4.63E-03 | 3.84E-02 | 3488.07  | not significant |
| 729 | LRRC61       | -1.06 | 7.98E-03 | 5.70E-02 | 2601.56  | not significant |
| 730 | TAF2         | -1.06 | 6.12E-03 | 4.71E-02 | 3169.45  | not significant |
| 731 | DDX27        | -1.06 | 2.84E-03 | 2.71E-02 | 3699.83  | not significant |
| 732 | INCENP       | -1.06 | 2.45E-03 | 2.47E-02 | 4570.05  | not significant |
| 733 | GAPVD1       | -1.06 | 1.05E-02 | 6.88E-02 | 2215.15  | not significant |
| 734 | PREPL        | -1.06 | 6.33E-03 | 4.82E-02 | 2636.84  | not significant |
| 735 | LARP1        | -1.06 | 5.09E-03 | 4.10E-02 | 19703.55 | not significant |
| 736 | MRPS35       | -1.06 | 5.98E-03 | 4.63E-02 | 2805.18  | not significant |
| 737 | 43710_4150   | -1.06 | 3.02E-04 | 5.25E-03 | 11369.11 | not significant |
| 738 | DTX1         | -1.06 | 1.74E-04 | 3.35E-03 | 15248.83 | not significant |
| 739 | DESI2        | -1.06 | 2.70E-03 | 2.62E-02 | 3748.02  | not significant |
| 740 | KTN1         | -1.06 | 4.46E-03 | 3.74E-02 | 7784.29  | not significant |
| 741 | C3orf62      | -1.06 | 3.58E-02 | 1.58E-01 | 388.88   | not significant |
| 742 | BCCIP        | -1.06 | 5.03E-03 | 4.08E-02 | 4533.37  | not significant |
| 743 | CSTF2        | -1.06 | 1.83E-02 | 1.01E-01 | 1263.46  | not significant |
| 744 | PRR13        | -1.06 | 8.77E-03 | 6.06E-02 | 3163.13  | not significant |
| 745 | FBXO28       | -1.06 | 1.55E-02 | 9.09E-02 | 1504.33  | not significant |
| 746 | MRPS23       | -1.06 | 1.07E-02 | 6.96E-02 | 2890.95  | not significant |
| 747 | ASCC3        | -1.06 | 5.31E-03 | 4.23E-02 | 6141.31  | not significant |
| 748 | FLNB         | -1.06 | 1.67E-02 | 9.52E-02 | 3873.98  | not significant |
| 749 | ZNF138       | -1.06 | 2.50E-02 | 1.25E-01 | 1154.47  | not significant |
| 750 | RAPGEF5      | -1.06 | 1.81E-02 | 1.00E-01 | 1855.77  | not significant |
| 751 | PSMD6        | -1.06 | 7.12E-03 | 5.26E-02 | 3135.33  | not significant |
| 752 | ZNF614       | -1.06 | 2.41E-02 | 1.22E-01 | 1341.28  | not significant |
| 753 | TLR9         | -1.06 | 3.29E-02 | 1.48E-01 | 278.35   | not significant |
| 754 | UMPS         | -1.06 | 1.21E-02 | 7.58E-02 | 1989.17  | not significant |
| 755 | LTB          | -1.06 | 3.09E-02 | 1.43E-01 | 850.96   | not significant |
| 756 | RCL1         | -1.06 | 2.28E-02 | 1.18E-01 | 1180.88  | not significant |
| 757 | SRSF10       | -1.06 | 1.91E-02 | 1.04E-01 | 1452.25  | not significant |
| 758 | RUVBL1       | -1.06 | 5.74E-03 | 4.50E-02 | 4239.58  | not significant |
| 759 | FAM91A1      | -1.06 | 5.52E-03 | 4.36E-02 | 3785.11  | not significant |
| 760 | SERHL2       | -1.06 | 3.66E-02 | 1.59E-01 | 429.33   | not significant |
| 761 | MICAL3       | -1.06 | 3.40E-02 | 1.52E-01 | 634.37   | not significant |
| 762 | KLHDC10      | -1.06 | 2.54E-02 | 1.26E-01 | 1212.89  | not significant |
| 763 | DDB1         | -1.06 | 3.52E-04 | 5.81E-03 | 15457.96 | not significant |
| 764 | LMAN2L       | -1.06 | 2.71E-02 | 1.31E-01 | 879.58   | not significant |
| 765 | RLIM         | -1.06 | 1.34E-02 | 8.19E-02 | 2812.48  | not significant |
| 766 | ZNF800       | -1.06 | 2.08E-02 | 1.10E-01 | 1605.56  | not significant |
| 767 | CRKL         | -1.06 | 1.37E-03 | 1.60E-02 | 6754.79  | not significant |
| 768 | FAR1         | -1.06 | 2.30E-03 | 2.37E-02 | 4885.23  | not significant |
| 769 | CLTC         | -1.06 | 2.04E-03 | 2.14E-02 | 18043.46 | not significant |
| 770 | NOMO1        | -1.06 | 2.75E-02 | 1.32E-01 | 956.79   | not significant |
| 771 | CCDC88A      | -1.06 | 1.05E-02 | 6.91E-02 | 3415.24  | not significant |
| 772 | DUSP7        | -1.06 | 1.59E-02 | 9.23E-02 | 1672.10  | not significant |
| 773 | CAPZA1       | -1.06 | 8.74E-04 | 1.15E-02 | 11948.28 | not significant |
| 774 | MEMO1        | -1.06 | 3.52E-02 | 1.56E-01 | 655.32   | not significant |
| 775 | MRPL47       | -1.06 | 1.99E-02 | 1.06E-01 | 1606.01  | not significant |
| 776 | TYW1         | -1.06 | 2.84E-02 | 1.35E-01 | 924.49   | not significant |
| 777 | DDX28        | -1.06 | 2.96E-02 | 1.39E-01 | 927.68   | not significant |
| 778 | HMG20A       | -1.06 | 1.23E-02 | 7.66E-02 | 1866.64  | not significant |
| 779 | C8orf33      | -1.06 | 3.75E-03 | 3.28E-02 | 7769.99  | not significant |

|     |          |       |          |          |          |                 |
|-----|----------|-------|----------|----------|----------|-----------------|
| 780 | FCF1     | -1.06 | 9.76E-03 | 6.54E-02 | 2524.80  | not significant |
| 781 | DCXR     | -1.06 | 2.96E-02 | 1.39E-01 | 1433.28  | not significant |
| 782 | TSSC4    | -1.06 | 2.78E-02 | 1.33E-01 | 1101.47  | not significant |
| 783 | INTS12   | -1.06 | 3.15E-02 | 1.44E-01 | 787.26   | not significant |
| 784 | PIK3C2A  | -1.06 | 2.92E-02 | 1.38E-01 | 1005.51  | not significant |
| 785 | PRELID1  | -1.06 | 1.21E-02 | 7.58E-02 | 4759.57  | not significant |
| 786 | CLASP2   | -1.06 | 1.03E-02 | 6.83E-02 | 2372.50  | not significant |
| 787 | FKBP1A   | -1.06 | 1.35E-03 | 1.59E-02 | 13550.41 | not significant |
| 788 | EIF2AK4  | -1.06 | 1.00E-02 | 6.64E-02 | 2443.60  | not significant |
| 789 | SLC39A14 | -1.06 | 4.19E-03 | 3.57E-02 | 4778.72  | not significant |
| 790 | HNRNPC   | -1.06 | 1.43E-03 | 1.65E-02 | 21780.92 | not significant |
| 791 | PPP1R12A | -1.06 | 3.25E-03 | 2.98E-02 | 5350.36  | not significant |
| 792 | FTSJ3    | -1.06 | 1.70E-03 | 1.88E-02 | 6090.38  | not significant |
| 793 | PTGES3   | -1.06 | 6.63E-04 | 9.35E-03 | 25522.88 | not significant |
| 794 | FOXN2    | -1.06 | 1.02E-02 | 6.76E-02 | 2821.65  | not significant |
| 795 | AEBP2    | -1.06 | 6.45E-03 | 4.88E-02 | 2898.89  | not significant |
| 796 | PPP4R1   | -1.06 | 3.91E-03 | 3.38E-02 | 3957.84  | not significant |
| 797 | CDV3     | -1.06 | 1.04E-03 | 1.31E-02 | 10740.39 | not significant |
| 798 | ARHGAP5  | -1.06 | 1.63E-02 | 9.37E-02 | 3010.26  | not significant |
| 799 | SPAG5    | -1.06 | 2.78E-03 | 2.67E-02 | 5111.75  | not significant |
| 800 | HSF1     | -1.06 | 1.25E-02 | 7.78E-02 | 2315.15  | not significant |
| 801 | BRMS1    | -1.06 | 1.34E-02 | 8.17E-02 | 3190.44  | not significant |
| 802 | RNF219   | -1.06 | 1.37E-02 | 8.28E-02 | 2016.75  | not significant |
| 803 | LRRFIP2  | -1.06 | 2.37E-02 | 1.20E-01 | 1233.84  | not significant |
| 804 | RABL3    | -1.06 | 2.21E-02 | 1.15E-01 | 1397.96  | not significant |
| 805 | NAE1     | -1.06 | 6.78E-03 | 5.08E-02 | 3543.02  | not significant |
| 806 | HSPA9    | -1.06 | 4.11E-04 | 6.55E-03 | 20295.31 | not significant |
| 807 | NUDT5    | -1.06 | 1.13E-02 | 7.23E-02 | 2823.73  | not significant |
| 808 | NUP35    | -1.06 | 3.08E-02 | 1.43E-01 | 917.14   | not significant |
| 809 | SUPT6H   | -1.06 | 2.66E-03 | 2.60E-02 | 6023.57  | not significant |
| 810 | EIF2B3   | -1.06 | 2.14E-02 | 1.13E-01 | 1423.48  | not significant |
| 811 | DEDD     | -1.06 | 1.70E-02 | 9.61E-02 | 1845.19  | not significant |
| 812 | RDH10    | -1.06 | 1.71E-02 | 9.66E-02 | 2106.35  | not significant |
| 813 | SRPK1    | -1.06 | 2.73E-03 | 2.63E-02 | 6763.37  | not significant |
| 814 | FAM168B  | -1.06 | 1.78E-03 | 1.94E-02 | 7240.70  | not significant |
| 815 | NCOR1    | -1.06 | 9.95E-03 | 6.62E-02 | 8123.91  | not significant |
| 816 | PIK3R1   | -1.06 | 3.99E-03 | 3.44E-02 | 5669.66  | not significant |
| 817 | CHTF8    | -1.06 | 1.94E-03 | 2.07E-02 | 5279.41  | not significant |
| 818 | SPATA2   | -1.06 | 2.76E-02 | 1.33E-01 | 1101.81  | not significant |
| 819 | CDK12    | -1.06 | 1.14E-02 | 7.25E-02 | 4976.34  | not significant |
| 820 | CREBBP   | -1.06 | 1.79E-02 | 9.94E-02 | 3559.70  | not significant |
| 821 | XPO4     | -1.06 | 1.63E-02 | 9.37E-02 | 3045.29  | not significant |
| 822 | C9orf78  | -1.06 | 5.39E-03 | 4.27E-02 | 6594.11  | not significant |
| 823 | GART     | -1.06 | 2.59E-03 | 2.56E-02 | 6196.78  | not significant |
| 824 | ZNF525   | -1.06 | 3.53E-02 | 1.56E-01 | 844.78   | not significant |
| 825 | NCL      | -1.06 | 2.54E-03 | 2.53E-02 | 60155.46 | not significant |
| 826 | MGA      | -1.06 | 1.97E-02 | 1.06E-01 | 3183.09  | not significant |
| 827 | DLAT     | -1.06 | 2.79E-02 | 1.34E-01 | 1201.40  | not significant |
| 828 | CMC2     | -1.06 | 2.50E-02 | 1.25E-01 | 1604.22  | not significant |
| 829 | HN1L     | -1.06 | 4.66E-03 | 3.85E-02 | 5108.57  | not significant |
| 830 | CORO1C   | -1.06 | 1.81E-03 | 1.96E-02 | 6017.51  | not significant |
| 831 | CCNJ     | -1.06 | 3.02E-02 | 1.41E-01 | 1031.05  | not significant |
| 832 | OGFOD1   | -1.06 | 8.67E-03 | 6.02E-02 | 2652.71  | not significant |
| 833 | RABEP1   | -1.06 | 6.16E-03 | 4.73E-02 | 4341.97  | not significant |
| 834 | DCAF7    | -1.06 | 1.99E-03 | 2.10E-02 | 12153.44 | not significant |
| 835 | NANP     | -1.06 | 2.61E-02 | 1.28E-01 | 1270.70  | not significant |
| 836 | MTCH2    | -1.06 | 6.23E-03 | 4.78E-02 | 3890.73  | not significant |
| 837 | LNK2     | -1.06 | 3.28E-02 | 1.48E-01 | 875.57   | not significant |
| 838 | NSD1     | -1.06 | 1.63E-02 | 9.37E-02 | 4469.27  | not significant |
| 839 | ZNF74    | -1.06 | 2.49E-02 | 1.24E-01 | 1233.92  | not significant |
| 840 | POMP     | -1.06 | 5.19E-03 | 4.16E-02 | 5218.66  | not significant |
| 841 | GNPNAT1  | -1.06 | 7.69E-03 | 5.58E-02 | 3233.58  | not significant |
| 842 | ESRRA    | -1.06 | 2.84E-02 | 1.35E-01 | 1261.09  | not significant |
| 843 | SAMD8    | -1.06 | 3.54E-02 | 1.57E-01 | 811.28   | not significant |
| 844 | ENC1     | -1.06 | 3.74E-02 | 1.62E-01 | 752.18   | not significant |
| 845 | CNN2     | -1.06 | 6.29E-03 | 4.81E-02 | 3639.82  | not significant |
| 846 | ESPL1    | -1.06 | 7.11E-03 | 5.26E-02 | 4665.46  | not significant |
| 847 | TLL12    | -1.06 | 2.56E-03 | 2.53E-02 | 7439.27  | not significant |
| 848 | PCGF5    | -1.06 | 3.81E-03 | 3.32E-02 | 5728.93  | not significant |
| 849 | CWF19L1  | -1.06 | 2.35E-02 | 1.20E-01 | 1789.92  | not significant |
| 850 | DNAJB6   | -1.06 | 1.71E-03 | 1.88E-02 | 8289.09  | not significant |
| 851 | IDH3A    | -1.06 | 8.23E-03 | 5.83E-02 | 3231.39  | not significant |
| 852 | AATF     | -1.06 | 6.13E-03 | 4.72E-02 | 4863.01  | not significant |
| 853 | PRPF19   | -1.06 | 2.96E-03 | 2.79E-02 | 11249.78 | not significant |
| 854 | DNMT3B   | -1.06 | 1.67E-02 | 9.52E-02 | 2475.14  | not significant |
| 855 | AAMP     | -1.06 | 8.70E-03 | 6.04E-02 | 3699.19  | not significant |
| 856 | MRPL4    | -1.06 | 1.36E-02 | 8.25E-02 | 4430.39  | not significant |
| 857 | PDCD2    | -1.06 | 1.82E-02 | 1.01E-01 | 3053.54  | not significant |
| 858 | CD300A   | -1.06 | 9.52E-03 | 6.43E-02 | 3935.80  | not significant |
| 859 | USPL1    | -1.06 | 1.43E-02 | 8.54E-02 | 2039.87  | not significant |
| 860 | LMNB2    | -1.06 | 2.21E-03 | 2.29E-02 | 11026.18 | not significant |
| 861 | ZNF202   | -1.06 | 3.05E-02 | 1.42E-01 | 1126.60  | not significant |
| 862 | ZNF146   | -1.06 | 6.41E-03 | 4.86E-02 | 7223.50  | not significant |
| 863 | PGM2     | -1.06 | 1.06E-02 | 6.92E-02 | 2733.92  | not significant |
| 864 | BAZ1A    | -1.06 | 8.10E-03 | 5.76E-02 | 5515.87  | not significant |
| 865 | FH       | -1.06 | 1.29E-02 | 7.93E-02 | 3096.96  | not significant |
| 866 | SF3A3    | -1.06 | 2.10E-03 | 2.18E-02 | 7575.87  | not significant |
| 867 | HDAC8    | -1.06 | 3.08E-02 | 1.42E-01 | 191.78   | not significant |

|     |          |       |          |          |          |                 |
|-----|----------|-------|----------|----------|----------|-----------------|
| 868 | UBXN7    | -1.06 | 3.37E-02 | 1.51E-01 | 1211.92  | not significant |
| 869 | MAP3K4   | -1.06 | 1.99E-02 | 1.06E-01 | 1712.69  | not significant |
| 870 | DENND4A  | -1.06 | 4.47E-02 | 1.83E-01 | 563.08   | not significant |
| 871 | SF3B4    | -1.06 | 3.60E-02 | 1.58E-01 | 885.07   | not significant |
| 872 | ZFP91    | -1.06 | 8.95E-03 | 6.16E-02 | 3687.57  | not significant |
| 873 | CSNK2A1  | -1.06 | 3.75E-03 | 3.28E-02 | 5527.40  | not significant |
| 874 | PLAC8    | -1.06 | 3.29E-02 | 1.48E-01 | 214.60   | not significant |
| 875 | PRR5     | -1.06 | 4.48E-02 | 1.83E-01 | 449.63   | not significant |
| 876 | NOL7     | -1.06 | 1.53E-02 | 9.02E-02 | 2217.40  | not significant |
| 877 | RUVBL2   | -1.06 | 1.45E-02 | 8.62E-02 | 5926.71  | not significant |
| 878 | RRP1B    | -1.06 | 4.72E-03 | 3.89E-02 | 5245.76  | not significant |
| 879 | RPGRIPL1 | -1.06 | 4.54E-02 | 1.85E-01 | 426.70   | not significant |
| 880 | RNF4     | -1.06 | 8.29E-03 | 5.85E-02 | 4216.61  | not significant |
| 881 | SMARCA5  | -1.06 | 2.08E-03 | 2.17E-02 | 11077.32 | not significant |
| 882 | RIOK2    | -1.06 | 2.16E-02 | 1.13E-01 | 1583.77  | not significant |
| 883 | NKRF     | -1.06 | 2.84E-02 | 1.35E-01 | 1290.55  | not significant |
| 884 | UBAP1    | -1.06 | 2.67E-02 | 1.30E-01 | 1568.62  | not significant |
| 885 | UQCC1    | -1.06 | 1.33E-02 | 8.12E-02 | 2365.96  | not significant |
| 886 | ELP4     | -1.06 | 3.82E-02 | 1.65E-01 | 881.67   | not significant |
| 887 | JUN      | -1.06 | 3.28E-02 | 1.48E-01 | 196.50   | not significant |
| 888 | NARS2    | -1.06 | 2.27E-02 | 1.17E-01 | 1584.39  | not significant |
| 889 | CINP     | -1.06 | 4.25E-02 | 1.77E-01 | 958.33   | not significant |
| 890 | PROSC    | -1.06 | 8.09E-03 | 5.75E-02 | 5715.10  | not significant |
| 891 | VAPA     | -1.06 | 4.00E-03 | 3.44E-02 | 6724.65  | not significant |
| 892 | ECHDC1   | -1.06 | 7.19E-03 | 5.29E-02 | 3599.45  | not significant |
| 893 | PSMD9    | -1.06 | 2.25E-02 | 1.17E-01 | 2275.33  | not significant |
| 894 | UQCRFS1  | -1.06 | 1.77E-02 | 9.89E-02 | 2810.06  | not significant |
| 895 | C16orf72 | -1.06 | 2.09E-02 | 1.10E-01 | 1904.31  | not significant |
| 896 | AGPS     | -1.06 | 1.34E-02 | 8.17E-02 | 3718.93  | not significant |
| 897 | MFAP1    | -1.06 | 1.90E-02 | 1.03E-01 | 1838.79  | not significant |
| 898 | ZC3H7B   | -1.06 | 3.28E-03 | 3.00E-02 | 6441.45  | not significant |
| 899 | RABEPK   | -1.06 | 3.70E-02 | 1.61E-01 | 1105.54  | not significant |
| 900 | BAZ1B    | -1.06 | 1.49E-02 | 8.82E-02 | 3079.32  | not significant |
| 901 | LPP      | -1.06 | 3.92E-02 | 1.67E-01 | 1526.28  | not significant |
| 902 | MTOR     | -1.06 | 2.19E-02 | 1.14E-01 | 4675.82  | not significant |
| 903 | ALDOA    | -1.06 | 7.66E-03 | 5.57E-02 | 32627.54 | not significant |
| 904 | DCAF6    | -1.06 | 3.37E-02 | 1.51E-01 | 1160.43  | not significant |
| 905 | TARBP1   | -1.06 | 1.44E-02 | 8.62E-02 | 2564.03  | not significant |
| 906 | SOCS4    | -1.06 | 1.86E-02 | 1.02E-01 | 3437.32  | not significant |
| 907 | SLC25A32 | -1.06 | 1.04E-02 | 6.87E-02 | 3400.77  | not significant |
| 908 | PLK3     | -1.06 | 4.65E-02 | 1.87E-01 | 595.17   | not significant |
| 909 | PURA     | -1.06 | 2.79E-02 | 1.34E-01 | 1447.79  | not significant |
| 910 | SPATA13  | -1.06 | 1.48E-02 | 8.77E-02 | 3452.96  | not significant |
| 911 | NSF      | -1.06 | 2.83E-02 | 1.35E-01 | 1358.47  | not significant |
| 912 | STK4     | -1.06 | 8.21E-03 | 5.82E-02 | 7964.21  | not significant |
| 913 | C10orf54 | -1.06 | 2.00E-02 | 1.07E-01 | 1914.85  | not significant |
| 914 | L3MBTL2  | -1.06 | 1.96E-02 | 1.05E-01 | 2090.29  | not significant |
| 915 | EI24     | -1.06 | 1.42E-02 | 8.50E-02 | 2435.49  | not significant |
| 916 | SAP18    | -1.06 | 1.72E-02 | 9.68E-02 | 4655.76  | not significant |
| 917 | ZNF91    | -1.06 | 3.60E-02 | 1.58E-01 | 1311.97  | not significant |
| 918 | PUS7L    | -1.06 | 4.26E-02 | 1.77E-01 | 1332.25  | not significant |
| 919 | ZNF252P  | -1.06 | 3.71E-02 | 1.61E-01 | 1159.29  | not significant |
| 920 | UBE2V2   | -1.06 | 9.04E-03 | 6.20E-02 | 4940.10  | not significant |
| 921 | SF1      | -1.06 | 8.27E-04 | 1.11E-02 | 15636.84 | not significant |
| 922 | ZDHHC9   | -1.06 | 4.64E-02 | 1.87E-01 | 700.71   | not significant |
| 923 | POU2F1   | -1.06 | 3.83E-02 | 1.65E-01 | 1504.74  | not significant |
| 924 | MKLN1    | -1.06 | 1.99E-02 | 1.06E-01 | 2710.46  | not significant |
| 925 | TATDN2   | -1.06 | 8.37E-03 | 5.90E-02 | 4429.21  | not significant |
| 926 | ACADSB   | -1.06 | 4.14E-02 | 1.74E-01 | 909.56   | not significant |
| 927 | QRSL1    | -1.06 | 3.24E-02 | 1.47E-01 | 1528.33  | not significant |
| 928 | MARS2    | -1.06 | 2.81E-02 | 1.35E-01 | 1452.70  | not significant |
| 929 | MEX3C    | -1.06 | 1.64E-02 | 9.39E-02 | 2923.03  | not significant |
| 930 | WDR82    | -1.06 | 1.32E-03 | 1.56E-02 | 11300.62 | not significant |
| 931 | USP16    | -1.06 | 2.15E-02 | 1.13E-01 | 2008.98  | not significant |
| 932 | GOLGA4   | -1.06 | 2.57E-02 | 1.27E-01 | 3140.56  | not significant |
| 933 | CELF1    | -1.06 | 9.76E-03 | 6.54E-02 | 6417.24  | not significant |
| 934 | GFPT1    | -1.06 | 1.70E-02 | 9.60E-02 | 3449.28  | not significant |
| 935 | UBAP2    | -1.06 | 1.72E-02 | 9.68E-02 | 3500.20  | not significant |
| 936 | ZNF641   | -1.06 | 5.17E-02 | 2.01E-01 | 441.56   | not significant |
| 937 | MRPS30   | -1.06 | 3.51E-02 | 1.56E-01 | 1226.21  | not significant |
| 938 | TP11     | -1.06 | 1.11E-02 | 7.14E-02 | 6903.61  | not significant |
| 939 | WDR33    | -1.06 | 9.21E-03 | 6.27E-02 | 4005.42  | not significant |
| 940 | RPS27L   | -1.05 | 4.16E-02 | 1.74E-01 | 1044.88  | not significant |
| 941 | VCP      | -1.05 | 2.49E-03 | 2.49E-02 | 18519.62 | not significant |
| 942 | FASTKD3  | -1.05 | 4.17E-02 | 1.75E-01 | 906.15   | not significant |
| 943 | KIAA1524 | -1.05 | 1.91E-02 | 1.04E-01 | 2598.38  | not significant |
| 944 | POLR2A   | -1.05 | 4.86E-02 | 1.93E-01 | 11921.21 | not significant |
| 945 | ZIK1     | -1.05 | 3.82E-02 | 1.65E-01 | 1071.15  | not significant |
| 946 | YLPM1    | -1.05 | 2.76E-02 | 1.33E-01 | 4938.67  | not significant |
| 947 | SH3BGR13 | -1.05 | 1.35E-02 | 8.19E-02 | 8224.37  | not significant |
| 948 | TAF13    | -1.05 | 4.76E-02 | 1.90E-01 | 350.26   | not significant |
| 949 | MTMR2    | -1.05 | 1.35E-02 | 8.19E-02 | 2911.38  | not significant |
| 950 | CORO1A   | -1.05 | 4.96E-03 | 4.02E-02 | 18520.35 | not significant |
| 951 | SRSF1    | -1.05 | 2.05E-03 | 2.15E-02 | 26977.68 | not significant |
| 952 | GLTP     | -1.05 | 3.21E-02 | 1.46E-01 | 1530.72  | not significant |
| 953 | PDCD11   | -1.05 | 9.09E-03 | 6.21E-02 | 6993.65  | not significant |
| 954 | ERI2     | -1.05 | 4.20E-02 | 1.75E-01 | 977.84   | not significant |
| 955 | DHX57    | -1.05 | 3.95E-02 | 1.68E-01 | 1163.05  | not significant |

|      |              |       |          |          |          |                 |
|------|--------------|-------|----------|----------|----------|-----------------|
| 956  | YOD1         | -1.05 | 3.22E-02 | 1.46E-01 | 1673.69  | not significant |
| 957  | FKTN         | -1.05 | 5.12E-02 | 2.00E-01 | 659.28   | not significant |
| 958  | ZNF134       | -1.05 | 4.32E-02 | 1.79E-01 | 1133.67  | not significant |
| 959  | KRAS         | -1.05 | 1.41E-02 | 8.45E-02 | 3434.76  | not significant |
| 960  | PIGA         | -1.05 | 5.23E-02 | 2.03E-01 | 512.02   | not significant |
| 961  | VRK3         | -1.05 | 4.09E-02 | 1.72E-01 | 1103.12  | not significant |
| 962  | SNX12        | -1.05 | 4.15E-02 | 1.74E-01 | 1032.23  | not significant |
| 963  | ANKRD33B     | -1.05 | 3.81E-02 | 1.64E-01 | 1573.57  | not significant |
| 964  | ESD          | -1.05 | 9.53E-03 | 6.44E-02 | 4990.84  | not significant |
| 965  | SLC35A4      | -1.05 | 6.71E-03 | 5.04E-02 | 4515.08  | not significant |
| 966  | MFN2         | -1.05 | 9.93E-03 | 6.61E-02 | 4860.39  | not significant |
| 967  | DLEU1        | -1.05 | 4.89E-02 | 1.94E-01 | 858.42   | not significant |
| 968  | ZNF544       | -1.05 | 3.09E-02 | 1.43E-01 | 1831.48  | not significant |
| 969  | ISOC1        | -1.05 | 2.96E-02 | 1.39E-01 | 1658.94  | not significant |
| 970  | ZNF429       | -1.05 | 3.99E-02 | 1.69E-01 | 256.30   | not significant |
| 971  | LCP2         | -1.05 | 7.84E-03 | 5.65E-02 | 5427.00  | not significant |
| 972  | ICE1         | -1.05 | 2.58E-02 | 1.27E-01 | 4244.00  | not significant |
| 973  | AP5M1        | -1.05 | 1.82E-02 | 1.00E-01 | 2532.78  | not significant |
| 974  | DDX24        | -1.05 | 5.14E-03 | 4.13E-02 | 6092.19  | not significant |
| 975  | MRPL12       | -1.05 | 2.52E-02 | 1.25E-01 | 5350.83  | not significant |
| 976  | HIGD1A       | -1.05 | 1.92E-02 | 1.04E-01 | 3989.03  | not significant |
| 977  | STOML2       | -1.05 | 1.87E-02 | 1.03E-01 | 4585.49  | not significant |
| 978  | CARS2        | -1.05 | 2.64E-02 | 1.29E-01 | 1735.96  | not significant |
| 979  | SLC41A1      | -1.05 | 3.18E-02 | 1.45E-01 | 2248.93  | not significant |
| 980  | SLC35C1      | -1.05 | 3.26E-02 | 1.48E-01 | 1494.62  | not significant |
| 981  | SART3        | -1.05 | 6.10E-03 | 4.70E-02 | 6198.69  | not significant |
| 982  | LARS         | -1.05 | 3.09E-03 | 2.87E-02 | 8103.11  | not significant |
| 983  | COA7         | -1.05 | 4.72E-02 | 1.89E-01 | 857.71   | not significant |
| 984  | NCBP1        | -1.05 | 1.05E-02 | 6.88E-02 | 3820.41  | not significant |
| 985  | PPARD        | -1.05 | 5.11E-02 | 2.00E-01 | 709.31   | not significant |
| 986  | C12orf43     | -1.05 | 3.13E-02 | 1.44E-01 | 1593.99  | not significant |
| 987  | TMEM167B     | -1.05 | 2.36E-02 | 1.20E-01 | 2051.89  | not significant |
| 988  | POLH         | -1.05 | 2.33E-02 | 1.19E-01 | 2134.26  | not significant |
| 989  | LOC100288637 | -1.05 | 5.43E-02 | 2.08E-01 | 558.34   | not significant |
| 990  | SLC25A15     | -1.05 | 2.66E-02 | 1.29E-01 | 1939.41  | not significant |
| 991  | INO80D       | -1.05 | 4.07E-02 | 1.71E-01 | 1092.40  | not significant |
| 992  | TNPO2        | -1.05 | 1.10E-02 | 7.11E-02 | 7920.43  | not significant |
| 993  | TWF1         | -1.05 | 4.91E-02 | 1.94E-01 | 822.22   | not significant |
| 994  | MAPK1        | -1.05 | 2.76E-03 | 2.66E-02 | 9329.63  | not significant |
| 995  | SREK1IP1     | -1.05 | 1.41E-02 | 8.45E-02 | 3164.39  | not significant |
| 996  | PRKACB       | -1.05 | 1.37E-02 | 8.30E-02 | 3875.82  | not significant |
| 997  | ZHX2         | -1.05 | 5.13E-02 | 2.00E-01 | 329.30   | not significant |
| 998  | AKAP1        | -1.05 | 2.28E-02 | 1.18E-01 | 4340.95  | not significant |
| 999  | SNHG16       | -1.05 | 3.13E-02 | 1.44E-01 | 2250.76  | not significant |
| 1000 | NT5DC2       | -1.05 | 3.18E-02 | 1.45E-01 | 1586.44  | not significant |
| 1001 | UBE2Q1       | -1.05 | 1.45E-02 | 8.65E-02 | 3091.36  | not significant |
| 1002 | FOXM1        | -1.05 | 9.72E-03 | 6.52E-02 | 5396.49  | not significant |
| 1003 | CAB39        | -1.05 | 3.82E-03 | 3.32E-02 | 7278.95  | not significant |
| 1004 | DMWD         | -1.05 | 5.41E-02 | 2.08E-01 | 731.31   | not significant |
| 1005 | ZNF281       | -1.05 | 3.30E-02 | 1.49E-01 | 1551.37  | not significant |
| 1006 | URB1         | -1.05 | 2.69E-02 | 1.30E-01 | 2903.81  | not significant |
| 1007 | CCNK         | -1.05 | 1.26E-02 | 7.83E-02 | 4447.49  | not significant |
| 1008 | ZC3H15       | -1.05 | 1.37E-02 | 8.30E-02 | 3875.88  | not significant |
| 1009 | STARD7       | -1.05 | 2.93E-03 | 2.77E-02 | 12325.16 | not significant |
| 1010 | ATP13A3      | -1.05 | 1.84E-02 | 1.01E-01 | 9047.73  | not significant |
| 1011 | ATP2A2       | -1.05 | 1.38E-02 | 8.35E-02 | 14094.89 | not significant |
| 1012 | FTSJ2        | -1.05 | 3.38E-02 | 1.51E-01 | 1860.88  | not significant |
| 1013 | NCOA7        | -1.05 | 4.07E-02 | 1.71E-01 | 1438.73  | not significant |
| 1014 | ZNF714       | -1.05 | 3.37E-02 | 1.51E-01 | 2087.50  | not significant |
| 1015 | SEC14L1      | -1.05 | 1.12E-02 | 7.19E-02 | 4830.33  | not significant |
| 1016 | LCT          | -1.05 | 5.55E-02 | 2.11E-01 | 438.86   | not significant |
| 1017 | WDR4         | -1.05 | 4.78E-02 | 1.91E-01 | 951.94   | not significant |
| 1018 | C1orf109     | -1.05 | 3.52E-02 | 1.56E-01 | 1503.13  | not significant |
| 1019 | ATPAF1       | -1.05 | 2.83E-02 | 1.35E-01 | 2068.96  | not significant |
| 1020 | PBX3         | -1.05 | 5.65E-02 | 2.13E-01 | 593.79   | not significant |
| 1021 | SAR1B        | -1.05 | 3.93E-02 | 1.67E-01 | 1622.34  | not significant |
| 1022 | SEH1L        | -1.05 | 8.71E-03 | 6.04E-02 | 4893.67  | not significant |
| 1023 | PAFAH2       | -1.05 | 2.85E-02 | 1.36E-01 | 1826.09  | not significant |
| 1024 | LONP2        | -1.05 | 2.19E-02 | 1.14E-01 | 3260.50  | not significant |
| 1025 | RNF216P1     | -1.05 | 4.65E-02 | 1.87E-01 | 1182.93  | not significant |
| 1026 | MPV17        | -1.05 | 4.77E-02 | 1.90E-01 | 1047.96  | not significant |
| 1027 | OAT          | -1.05 | 3.68E-02 | 1.60E-01 | 1670.27  | not significant |
| 1028 | ANP32A       | -1.05 | 1.32E-02 | 8.09E-02 | 6609.00  | not significant |
| 1029 | C7orf50      | -1.05 | 5.17E-02 | 2.01E-01 | 1237.80  | not significant |
| 1030 | ZNF562       | -1.05 | 5.62E-02 | 2.13E-01 | 836.29   | not significant |
| 1031 | RCOR1        | -1.05 | 1.97E-02 | 1.06E-01 | 3144.77  | not significant |
| 1032 | PPTC7        | -1.05 | 2.35E-02 | 1.20E-01 | 3499.15  | not significant |
| 1033 | YWHAB        | -1.05 | 3.05E-03 | 2.86E-02 | 21853.62 | not significant |
| 1034 | RAB23        | -1.05 | 5.86E-02 | 2.18E-01 | 462.08   | not significant |
| 1035 | OTUD3        | -1.05 | 5.54E-02 | 2.11E-01 | 902.69   | not significant |
| 1036 | YBX3         | -1.05 | 2.86E-02 | 1.36E-01 | 2653.96  | not significant |
| 1037 | DDX55        | -1.05 | 1.89E-02 | 1.03E-01 | 2976.64  | not significant |
| 1038 | AXIN2        | -1.05 | 1.84E-02 | 1.01E-01 | 116.71   | not significant |
| 1039 | ZNF143       | -1.05 | 5.30E-02 | 2.04E-01 | 836.41   | not significant |
| 1040 | LSG1         | -1.05 | 1.60E-02 | 9.26E-02 | 3196.31  | not significant |
| 1041 | USP36        | -1.05 | 1.12E-02 | 7.21E-02 | 5452.97  | not significant |
| 1042 | NUP98        | -1.05 | 1.01E-02 | 6.68E-02 | 7116.87  | not significant |
| 1043 | TAB2         | -1.05 | 2.61E-02 | 1.28E-01 | 2381.35  | not significant |

|      |              |       |          |          |          |                 |
|------|--------------|-------|----------|----------|----------|-----------------|
| 1044 | CBX4         | -1.05 | 2.31E-02 | 1.19E-01 | 2805.97  | not significant |
| 1045 | KPNA1        | -1.05 | 1.23E-02 | 7.66E-02 | 4092.17  | not significant |
| 1046 | ATG3         | -1.05 | 2.16E-02 | 1.13E-01 | 3787.29  | not significant |
| 1047 | LRRC47       | -1.05 | 2.41E-02 | 1.22E-01 | 2776.96  | not significant |
| 1048 | MED27        | -1.05 | 6.14E-02 | 2.25E-01 | 700.58   | not significant |
| 1049 | CDK2AP1      | -1.05 | 2.69E-02 | 1.30E-01 | 3707.10  | not significant |
| 1050 | HSPA14       | -1.05 | 1.80E-02 | 9.99E-02 | 3392.01  | not significant |
| 1051 | OXSFR1       | -1.05 | 1.18E-02 | 7.47E-02 | 5540.47  | not significant |
| 1052 | PTEN         | -1.05 | 4.15E-03 | 3.55E-02 | 9196.21  | not significant |
| 1053 | LRCH3        | -1.05 | 5.97E-02 | 2.21E-01 | 626.97   | not significant |
| 1054 | NAMPT        | -1.05 | 3.33E-02 | 1.50E-01 | 1757.16  | not significant |
| 1055 | CCR7         | -1.05 | 5.99E-02 | 2.21E-01 | 608.17   | not significant |
| 1056 | TNFRSF8      | -1.05 | 4.30E-02 | 1.79E-01 | 1288.28  | not significant |
| 1057 | GTF3C6       | -1.05 | 2.87E-02 | 1.36E-01 | 2774.39  | not significant |
| 1058 | PSMD14       | -1.05 | 1.90E-02 | 1.03E-01 | 4483.16  | not significant |
| 1059 | RBBP6        | -1.05 | 2.70E-02 | 1.31E-01 | 4952.25  | not significant |
| 1060 | CCDC47       | -1.05 | 9.12E-03 | 6.22E-02 | 6085.83  | not significant |
| 1061 | IQCE         | -1.05 | 5.13E-02 | 2.00E-01 | 998.95   | not significant |
| 1062 | CTU2         | -1.05 | 5.46E-02 | 2.09E-01 | 1227.25  | not significant |
| 1063 | SMC5         | -1.05 | 2.16E-02 | 1.13E-01 | 3739.65  | not significant |
| 1064 | DCUN1D3      | -1.05 | 4.01E-02 | 1.70E-01 | 201.25   | not significant |
| 1065 | EML5         | -1.05 | 4.82E-02 | 1.92E-01 | 246.24   | not significant |
| 1066 | LOC101927482 | -1.05 | 7.43E-02 | 2.54E-01 | 312.75   | not significant |
| 1067 | MRPS12       | -1.05 | 5.23E-02 | 2.03E-01 | 1665.12  | not significant |
| 1068 | NUDCD1       | -1.05 | 2.02E-02 | 1.07E-01 | 3185.98  | not significant |
| 1069 | CENPF        | -1.05 | 6.41E-02 | 2.31E-01 | 10726.35 | not significant |
| 1070 | SCO1         | -1.05 | 4.70E-02 | 1.89E-01 | 1416.04  | not significant |
| 1071 | PP1L1        | -1.05 | 3.02E-02 | 1.41E-01 | 2133.91  | not significant |
| 1072 | NOC2L        | -1.05 | 9.90E-03 | 6.60E-02 | 4984.18  | not significant |
| 1073 | ZNF22        | -1.05 | 8.96E-03 | 6.16E-02 | 5008.53  | not significant |
| 1074 | TOMM22       | -1.05 | 3.09E-02 | 1.43E-01 | 6110.72  | not significant |
| 1075 | PSMD4        | -1.05 | 2.19E-02 | 1.14E-01 | 4132.78  | not significant |
| 1076 | POLR2E       | -1.05 | 1.13E-02 | 7.22E-02 | 7354.70  | not significant |
| 1077 | ISG20L2      | -1.05 | 2.67E-02 | 1.30E-01 | 2360.82  | not significant |
| 1078 | RNF169       | -1.05 | 4.55E-02 | 1.85E-01 | 1872.60  | not significant |
| 1079 | RNF6         | -1.05 | 2.70E-02 | 1.31E-01 | 2984.92  | not significant |
| 1080 | ATG101       | -1.05 | 5.69E-02 | 2.15E-01 | 1128.05  | not significant |
| 1081 | FAM222B      | -1.05 | 5.81E-02 | 2.17E-01 | 819.11   | not significant |
| 1082 | LDLRAD4      | -1.05 | 1.03E-02 | 6.82E-02 | 6713.91  | not significant |
| 1083 | AKAP8        | -1.05 | 4.19E-02 | 1.75E-01 | 1774.33  | not significant |
| 1084 | TIMM44       | -1.05 | 3.55E-02 | 1.57E-01 | 2235.29  | not significant |
| 1085 | CDK8         | -1.05 | 5.63E-02 | 2.13E-01 | 1069.05  | not significant |
| 1086 | PSME2        | -1.05 | 2.16E-02 | 1.13E-01 | 8817.80  | not significant |
| 1087 | LRP6         | -1.05 | 5.50E-02 | 2.10E-01 | 1485.96  | not significant |
| 1088 | TLL5         | -1.05 | 4.90E-02 | 1.94E-01 | 1316.87  | not significant |
| 1089 | RREB1        | -1.05 | 4.72E-02 | 1.89E-01 | 1442.76  | not significant |
| 1090 | FYTTD1       | -1.05 | 3.14E-02 | 1.44E-01 | 2106.64  | not significant |
| 1091 | CTR9         | -1.05 | 2.20E-02 | 1.15E-01 | 4518.06  | not significant |
| 1092 | ZKSCAN5      | -1.05 | 5.24E-02 | 2.03E-01 | 1197.91  | not significant |
| 1093 | BZW1         | -1.05 | 1.04E-02 | 6.83E-02 | 9224.85  | not significant |
| 1094 | BAK1         | -1.05 | 4.88E-02 | 1.94E-01 | 1534.56  | not significant |
| 1095 | SLC39A10     | -1.05 | 4.64E-02 | 1.87E-01 | 1668.40  | not significant |
| 1096 | C17orf80     | -1.05 | 2.61E-02 | 1.28E-01 | 2534.98  | not significant |
| 1097 | FAM104A      | -1.05 | 2.25E-02 | 1.17E-01 | 2868.06  | not significant |
| 1098 | MLH3         | -1.05 | 4.39E-02 | 1.81E-01 | 1411.09  | not significant |
| 1099 | YWHAE        | -1.05 | 1.13E-02 | 7.22E-02 | 18029.36 | not significant |
| 1100 | PRKRIR       | -1.05 | 3.17E-02 | 1.45E-01 | 2972.76  | not significant |
| 1101 | RAB21        | -1.05 | 2.48E-02 | 1.24E-01 | 2772.53  | not significant |
| 1102 | SH3KBP1      | -1.05 | 1.17E-02 | 7.42E-02 | 5876.70  | not significant |
| 1103 | AP2B1        | -1.05 | 3.43E-02 | 1.53E-01 | 4082.64  | not significant |
| 1104 | DCAF10       | -1.05 | 5.31E-02 | 2.05E-01 | 1383.36  | not significant |
| 1105 | SLC9B2       | -1.05 | 3.92E-02 | 1.67E-01 | 1693.92  | not significant |
| 1106 | RAB8A        | -1.05 | 1.88E-02 | 1.03E-01 | 5132.35  | not significant |
| 1107 | UHMK1        | -1.05 | 1.65E-02 | 9.43E-02 | 7989.75  | not significant |
| 1108 | UBQLN4       | -1.05 | 2.56E-02 | 1.27E-01 | 2620.38  | not significant |
| 1109 | XRCC5        | -1.05 | 2.28E-03 | 2.35E-02 | 24812.24 | not significant |
| 1110 | RPP14        | -1.05 | 4.57E-02 | 1.86E-01 | 1559.69  | not significant |
| 1111 | PRKDC        | -1.05 | 3.14E-02 | 1.44E-01 | 33430.80 | not significant |
| 1112 | PRPF3        | -1.05 | 6.29E-02 | 2.28E-01 | 919.83   | not significant |
| 1113 | MFNG         | -1.05 | 4.02E-02 | 1.70E-01 | 2271.37  | not significant |
| 1114 | ELK4         | -1.05 | 3.10E-02 | 1.43E-01 | 3611.87  | not significant |
| 1115 | ZMPSTE24     | -1.05 | 3.03E-02 | 1.41E-01 | 3227.53  | not significant |
| 1116 | ZNF518B      | -1.05 | 5.44E-02 | 2.08E-01 | 1520.15  | not significant |
| 1117 | GTSE1        | -1.05 | 3.05E-02 | 1.42E-01 | 2596.57  | not significant |
| 1118 | HDAC2        | -1.05 | 7.70E-03 | 5.58E-02 | 8086.20  | not significant |
| 1119 | YWHAG        | -1.05 | 3.96E-03 | 3.42E-02 | 21241.11 | not significant |
| 1120 | RPS4Y1       | -1.05 | 1.79E-02 | 9.94E-02 | 11507.90 | not significant |
| 1121 | TOMM70A      | -1.05 | 8.90E-03 | 6.14E-02 | 6580.67  | not significant |
| 1122 | ABHD5        | -1.05 | 6.87E-02 | 2.42E-01 | 669.78   | not significant |
| 1123 | RNPS1        | -1.05 | 1.74E-02 | 9.74E-02 | 7531.25  | not significant |
| 1124 | AMD1         | -1.05 | 9.08E-03 | 6.21E-02 | 8880.85  | not significant |
| 1125 | ABCF1        | -1.05 | 3.14E-02 | 1.44E-01 | 3037.03  | not significant |
| 1126 | STX18        | -1.05 | 6.29E-02 | 2.28E-01 | 956.48   | not significant |
| 1127 | HDHD1        | -1.05 | 4.49E-02 | 1.84E-01 | 1585.79  | not significant |
| 1128 | SKA3         | -1.05 | 4.09E-02 | 1.72E-01 | 2501.23  | not significant |
| 1129 | LRRFIP1      | -1.05 | 1.99E-02 | 1.06E-01 | 5916.49  | not significant |
| 1130 | WAPAL        | -1.05 | 1.80E-02 | 9.98E-02 | 5063.94  | not significant |
| 1131 | GNG2         | -1.05 | 4.83E-03 | 3.95E-02 | 11270.86 | not significant |



|      |           |       |          |          |          |                 |
|------|-----------|-------|----------|----------|----------|-----------------|
| 1132 | BID       | -1.05 | 2.91E-02 | 1.38E-01 | 3952.81  | not significant |
| 1133 | ZC3H11A   | -1.05 | 1.59E-02 | 9.25E-02 | 5256.31  | not significant |
| 1134 | HNRNPAB   | -1.05 | 1.01E-02 | 6.71E-02 | 17676.90 | not significant |
| 1135 | LINC00665 | -1.05 | 6.73E-02 | 2.39E-01 | 415.33   | not significant |
| 1136 | KLF10     | -1.05 | 4.60E-02 | 1.86E-01 | 1514.97  | not significant |
| 1137 | PRPF38A   | -1.05 | 1.79E-02 | 9.94E-02 | 4477.62  | not significant |
| 1138 | PDP2      | -1.05 | 5.14E-02 | 2.00E-01 | 1672.81  | not significant |
| 1139 | IMP4      | -1.05 | 3.39E-02 | 1.51E-01 | 2293.45  | not significant |
| 1140 | MRPL49    | -1.05 | 3.12E-02 | 1.44E-01 | 3477.99  | not significant |
| 1141 | ERAL1     | -1.05 | 3.58E-02 | 1.58E-01 | 2040.01  | not significant |
| 1142 | TFEC      | -1.05 | 1.72E-02 | 9.67E-02 | 7266.20  | not significant |
| 1143 | ITCH      | -1.05 | 1.59E-02 | 9.23E-02 | 5352.22  | not significant |
| 1144 | MPV17L2   | -1.05 | 5.76E-02 | 2.16E-01 | 1170.99  | not significant |
| 1145 | SEN2      | -1.05 | 3.96E-02 | 1.68E-01 | 1949.91  | not significant |
| 1146 | MYD88     | -1.05 | 1.81E-02 | 1.00E-01 | 3781.50  | not significant |
| 1147 | CEP350    | -1.05 | 4.18E-02 | 1.75E-01 | 4252.07  | not significant |
| 1148 | NUPL1     | -1.05 | 1.69E-02 | 9.60E-02 | 6792.34  | not significant |
| 1149 | ZNF664    | -1.05 | 1.32E-02 | 8.08E-02 | 10467.93 | not significant |
| 1150 | PTGIS     | -1.05 | 8.75E-03 | 6.05E-02 | 8244.57  | not significant |
| 1151 | BTBD3     | -1.05 | 6.31E-02 | 2.28E-01 | 962.82   | not significant |
| 1152 | PLS1      | -1.05 | 5.46E-02 | 2.09E-01 | 1556.44  | not significant |
| 1153 | APTX      | -1.05 | 5.04E-02 | 1.98E-01 | 1415.04  | not significant |
| 1154 | FBXL3     | -1.05 | 3.77E-02 | 1.63E-01 | 2423.17  | not significant |
| 1155 | HCFC1     | -1.05 | 4.63E-02 | 1.87E-01 | 2761.99  | not significant |
| 1156 | NUFIP2    | -1.05 | 7.06E-02 | 2.46E-01 | 7933.93  | not significant |
| 1157 | RAB14     | -1.05 | 3.24E-02 | 1.47E-01 | 2736.50  | not significant |
| 1158 | PSMD1     | -1.05 | 1.92E-02 | 1.04E-01 | 6319.36  | not significant |
| 1159 | DCTN1     | -1.05 | 9.32E-03 | 6.32E-02 | 7196.55  | not significant |
| 1160 | EMC8      | -1.05 | 4.57E-02 | 1.86E-01 | 1983.80  | not significant |
| 1161 | PPFIA1    | -1.05 | 4.82E-02 | 1.92E-01 | 1657.33  | not significant |
| 1162 | GTF3C2    | -1.05 | 2.53E-02 | 1.26E-01 | 3566.38  | not significant |
| 1163 | ARHGAP30  | -1.05 | 9.11E-03 | 6.21E-02 | 9391.58  | not significant |
| 1164 | TTPAL     | -1.05 | 5.36E-02 | 2.06E-01 | 1459.52  | not significant |
| 1165 | HDAC4     | -1.05 | 2.44E-02 | 1.23E-01 | 6222.03  | not significant |
| 1166 | EMC9      | -1.05 | 6.88E-02 | 2.42E-01 | 401.43   | not significant |
| 1167 | BCS1L     | -1.05 | 6.98E-02 | 2.45E-01 | 846.34   | not significant |
| 1168 | ATP5C1    | -1.05 | 1.79E-02 | 9.94E-02 | 7645.87  | not significant |
| 1169 | PICALM    | -1.05 | 2.50E-02 | 1.25E-01 | 3937.26  | not significant |
| 1170 | TERF2     | -1.05 | 4.01E-02 | 1.70E-01 | 2101.07  | not significant |
| 1171 | KIF1B     | -1.05 | 7.35E-02 | 2.53E-01 | 1037.30  | not significant |
| 1172 | PTER      | -1.05 | 6.01E-02 | 2.21E-01 | 1355.07  | not significant |
| 1173 | ALG8      | -1.05 | 4.66E-02 | 1.87E-01 | 1704.50  | not significant |
| 1174 | PINK1-AS  | -1.05 | 6.94E-02 | 2.44E-01 | 419.19   | not significant |
| 1175 | ZNF761    | -1.05 | 6.85E-02 | 2.41E-01 | 1256.79  | not significant |
| 1176 | SETMAR    | -1.05 | 7.08E-02 | 2.47E-01 | 774.22   | not significant |
| 1177 | ATP5F1    | -1.05 | 2.99E-02 | 1.40E-01 | 6445.63  | not significant |
| 1178 | ZNF585A   | -1.05 | 7.25E-02 | 2.51E-01 | 598.92   | not significant |
| 1179 | NDE1      | -1.05 | 5.57E-02 | 2.11E-01 | 1497.45  | not significant |
| 1180 | ZNF347    | -1.05 | 6.24E-02 | 2.27E-01 | 1082.26  | not significant |
| 1181 | MCFD2     | -1.05 | 2.29E-02 | 1.18E-01 | 3975.68  | not significant |
| 1182 | ALKBH1    | -1.05 | 7.38E-02 | 2.53E-01 | 569.21   | not significant |
| 1183 | TRA2B     | -1.05 | 1.20E-02 | 7.54E-02 | 13614.30 | not significant |
| 1184 | INPP5A    | -1.05 | 7.43E-02 | 2.54E-01 | 581.62   | not significant |
| 1185 | DPH3      | -1.05 | 5.10E-02 | 2.00E-01 | 1860.36  | not significant |
| 1186 | ARL5A     | -1.05 | 2.65E-02 | 1.29E-01 | 3153.27  | not significant |
| 1187 | SGTA      | -1.05 | 3.73E-02 | 1.62E-01 | 4615.56  | not significant |
| 1188 | NUSAP1    | -1.05 | 1.72E-02 | 9.68E-02 | 5423.03  | not significant |
| 1189 | RBM25     | -1.05 | 1.89E-02 | 1.03E-01 | 7354.08  | not significant |
| 1190 | TIMM50    | -1.05 | 5.33E-02 | 2.06E-01 | 2745.12  | not significant |
| 1191 | IDE       | -1.05 | 5.20E-02 | 2.02E-01 | 2095.56  | not significant |
| 1192 | WBP11     | -1.05 | 1.40E-02 | 8.42E-02 | 6691.50  | not significant |
| 1193 | HMGXB3    | -1.05 | 4.02E-02 | 1.70E-01 | 2460.31  | not significant |
| 1194 | RUNX3     | -1.05 | 3.67E-02 | 1.60E-01 | 2736.08  | not significant |
| 1195 | PSMD5     | -1.05 | 5.98E-02 | 2.21E-01 | 1416.93  | not significant |
| 1196 | UBIAD1    | -1.05 | 5.86E-02 | 2.18E-01 | 1459.02  | not significant |
| 1197 | MCM3AP    | -1.05 | 3.84E-02 | 1.65E-01 | 3152.32  | not significant |
| 1198 | FAM120A   | -1.05 | 1.43E-02 | 8.54E-02 | 7957.84  | not significant |
| 1199 | BRWD3     | -1.05 | 7.50E-02 | 2.55E-01 | 786.51   | not significant |
| 1200 | CUX1      | -1.05 | 5.98E-02 | 2.21E-01 | 1253.22  | not significant |
| 1201 | KIAA0020  | -1.05 | 2.75E-02 | 1.32E-01 | 3406.66  | not significant |
| 1202 | KRR1      | -1.05 | 2.66E-02 | 1.29E-01 | 3654.03  | not significant |
| 1203 | NOVA1     | -1.05 | 3.13E-02 | 1.44E-01 | 137.57   | not significant |
| 1204 | NBEAL1    | -1.05 | 6.73E-02 | 2.39E-01 | 270.64   | not significant |
| 1205 | NFKB1B    | -1.05 | 6.22E-02 | 2.27E-01 | 1393.58  | not significant |
| 1206 | C20orf27  | -1.05 | 5.41E-02 | 2.08E-01 | 3292.49  | not significant |
| 1207 | MLLT10    | -1.05 | 3.99E-02 | 1.69E-01 | 2316.94  | not significant |
| 1208 | ZNF616    | -1.05 | 7.69E-02 | 2.60E-01 | 631.25   | not significant |
| 1209 | MAPKAPK5  | -1.05 | 4.04E-02 | 1.70E-01 | 2486.06  | not significant |
| 1210 | GRPEL2    | -1.05 | 7.64E-02 | 2.59E-01 | 665.13   | not significant |
| 1211 | IP6K1     | -1.05 | 4.96E-02 | 1.96E-01 | 1985.52  | not significant |
| 1212 | TYW3      | -1.05 | 4.10E-02 | 1.72E-01 | 2410.06  | not significant |
| 1213 | RPS6KA3   | -1.05 | 3.60E-02 | 1.58E-01 | 6539.89  | not significant |
| 1214 | RFX7      | -1.05 | 5.63E-02 | 2.13E-01 | 2895.88  | not significant |
| 1215 | CBLL1     | -1.05 | 4.71E-02 | 1.89E-01 | 2633.11  | not significant |
| 1216 | PSMC6     | -1.05 | 3.50E-02 | 1.56E-01 | 3055.29  | not significant |
| 1217 | PFAS      | -1.05 | 2.08E-02 | 1.10E-01 | 6219.36  | not significant |
| 1218 | WARS      | -1.05 | 2.79E-02 | 1.34E-01 | 3830.50  | not significant |
| 1219 | AP2M1     | -1.05 | 1.83E-02 | 1.01E-01 | 8939.03  | not significant |

|      |           |       |          |          |          |                 |
|------|-----------|-------|----------|----------|----------|-----------------|
| 1220 | CYFIP2    | -1.05 | 1.52E-02 | 8.95E-02 | 16276.38 | not significant |
| 1221 | MAGOH     | -1.05 | 4.42E-02 | 1.82E-01 | 2642.15  | not significant |
| 1222 | CNOT11    | -1.05 | 3.97E-02 | 1.69E-01 | 3841.25  | not significant |
| 1223 | PTMA      | -1.05 | 2.54E-02 | 1.26E-01 | 72149.33 | not significant |
| 1224 | LCOR      | -1.05 | 7.86E-02 | 2.63E-01 | 816.56   | not significant |
| 1225 | NDUFAB1   | -1.05 | 5.55E-02 | 2.11E-01 | 3202.92  | not significant |
| 1226 | SDHAF2    | -1.05 | 6.61E-02 | 2.36E-01 | 1481.19  | not significant |
| 1227 | PHC3      | -1.05 | 6.26E-02 | 2.28E-01 | 2468.65  | not significant |
| 1228 | EIF1AD    | -1.05 | 4.23E-02 | 1.76E-01 | 2361.25  | not significant |
| 1229 | PPP2R2A   | -1.05 | 3.54E-02 | 1.56E-01 | 3034.48  | not significant |
| 1230 | RBM26-AS1 | -1.04 | 2.37E-02 | 1.20E-01 | 114.59   | not significant |
| 1231 | RPL7L1    | -1.04 | 5.60E-02 | 2.12E-01 | 1682.19  | not significant |
| 1232 | FEM1A     | -1.04 | 4.35E-02 | 1.80E-01 | 2322.57  | not significant |
| 1233 | POU3F2    | -1.04 | 7.15E-02 | 2.49E-01 | 339.87   | not significant |
| 1234 | EHD4      | -1.04 | 7.51E-02 | 2.55E-01 | 402.12   | not significant |
| 1235 | TRIM14    | -1.04 | 2.52E-02 | 1.26E-01 | 4560.87  | not significant |
| 1236 | TBC1D13   | -1.04 | 7.37E-02 | 2.53E-01 | 919.56   | not significant |
| 1237 | TIMM17A   | -1.04 | 5.74E-02 | 2.16E-01 | 2564.28  | not significant |
| 1238 | SH3TC1    | -1.04 | 7.73E-02 | 2.61E-01 | 414.35   | not significant |
| 1239 | GTF2I     | -1.04 | 3.84E-02 | 1.65E-01 | 3480.66  | not significant |
| 1240 | NEK9      | -1.04 | 3.05E-02 | 1.42E-01 | 3901.60  | not significant |
| 1241 | CHD4      | -1.04 | 1.70E-02 | 9.61E-02 | 17981.41 | not significant |
| 1242 | PDS5A     | -1.04 | 1.22E-02 | 7.62E-02 | 11264.81 | not significant |
| 1243 | B4GALT5   | -1.04 | 7.39E-02 | 2.53E-01 | 960.91   | not significant |
| 1244 | IPW       | -1.04 | 6.74E-02 | 2.39E-01 | 293.96   | not significant |
| 1245 | MSANTD4   | -1.04 | 7.83E-02 | 2.63E-01 | 894.28   | not significant |
| 1246 | TGIF2     | -1.04 | 4.66E-02 | 1.87E-01 | 2165.33  | not significant |
| 1247 | CLIP1     | -1.04 | 4.58E-02 | 1.86E-01 | 2465.44  | not significant |
| 1248 | CDC25B    | -1.04 | 1.20E-02 | 7.54E-02 | 8282.27  | not significant |
| 1249 | CRADD     | -1.04 | 6.06E-02 | 2.23E-01 | 270.75   | not significant |
| 1250 | CHCHD10   | -1.04 | 8.20E-02 | 2.71E-01 | 735.28   | not significant |
| 1251 | TSC2D2D2  | -1.04 | 8.10E-02 | 2.69E-01 | 593.03   | not significant |
| 1252 | FANCM     | -1.04 | 7.85E-02 | 2.63E-01 | 874.57   | not significant |
| 1253 | UROS      | -1.04 | 6.14E-02 | 2.25E-01 | 1587.03  | not significant |
| 1254 | AP1G1     | -1.04 | 4.71E-02 | 1.89E-01 | 4219.16  | not significant |
| 1255 | DES1      | -1.04 | 4.55E-02 | 1.85E-01 | 2566.13  | not significant |
| 1256 | AHCTF1    | -1.04 | 4.03E-02 | 1.70E-01 | 3229.29  | not significant |
| 1257 | FAM72B    | -1.04 | 2.96E-02 | 1.39E-01 | 135.88   | not significant |
| 1258 | EEF1E1    | -1.04 | 8.12E-02 | 2.69E-01 | 512.91   | not significant |
| 1259 | NFE2L2    | -1.04 | 4.69E-02 | 1.89E-01 | 2192.35  | not significant |
| 1260 | TRAF3IP1  | -1.04 | 8.42E-02 | 2.76E-01 | 582.33   | not significant |
| 1261 | OXNAD1    | -1.04 | 8.09E-02 | 2.69E-01 | 760.95   | not significant |
| 1262 | RPP30     | -1.04 | 6.30E-02 | 2.28E-01 | 1725.74  | not significant |
| 1263 | FZR1      | -1.04 | 4.71E-02 | 1.89E-01 | 2101.97  | not significant |
| 1264 | PRMT1     | -1.04 | 3.52E-02 | 1.56E-01 | 10678.83 | not significant |
| 1265 | CCDC137   | -1.04 | 4.72E-02 | 1.89E-01 | 2545.49  | not significant |
| 1266 | CDK13     | -1.04 | 4.94E-02 | 1.95E-01 | 2947.80  | not significant |
| 1267 | MON1A     | -1.04 | 8.30E-02 | 2.73E-01 | 723.37   | not significant |
| 1268 | SET       | -1.04 | 1.51E-02 | 8.94E-02 | 24551.75 | not significant |
| 1269 | PFND2     | -1.04 | 8.00E-02 | 2.67E-01 | 1482.20  | not significant |
| 1270 | ANKRD12   | -1.04 | 7.45E-02 | 2.54E-01 | 2209.88  | not significant |
| 1271 | CCT4      | -1.04 | 2.67E-02 | 1.30E-01 | 12195.72 | not significant |
| 1272 | PPWD1     | -1.04 | 6.59E-02 | 2.35E-01 | 1567.67  | not significant |
| 1273 | MCUR1     | -1.04 | 3.84E-02 | 1.65E-01 | 3250.26  | not significant |
| 1274 | CEP170    | -1.04 | 8.30E-02 | 2.73E-01 | 515.29   | not significant |
| 1275 | ERCC4     | -1.04 | 8.42E-02 | 2.76E-01 | 821.24   | not significant |
| 1276 | ZNF611    | -1.04 | 8.28E-02 | 2.73E-01 | 692.14   | not significant |
| 1277 | PPP1R7    | -1.04 | 5.06E-02 | 1.99E-01 | 2292.34  | not significant |
| 1278 | TGFBRAP1  | -1.04 | 5.22E-02 | 2.03E-01 | 2187.29  | not significant |
| 1279 | EIF6      | -1.04 | 4.17E-02 | 1.74E-01 | 4350.01  | not significant |
| 1280 | CDC42     | -1.04 | 2.31E-02 | 1.19E-01 | 6532.33  | not significant |
| 1281 | MRPL36    | -1.04 | 9.56E-02 | 2.99E-01 | 592.45   | not significant |
| 1282 | COPS8     | -1.04 | 5.43E-02 | 2.08E-01 | 2746.32  | not significant |
| 1283 | C2orf44   | -1.04 | 5.96E-02 | 2.21E-01 | 1595.31  | not significant |
| 1284 | RPF1      | -1.04 | 6.67E-02 | 2.37E-01 | 2410.25  | not significant |
| 1285 | PPF1BP1   | -1.04 | 6.83E-02 | 2.41E-01 | 1479.72  | not significant |
| 1286 | CD3G      | -1.04 | 2.80E-02 | 1.34E-01 | 6364.92  | not significant |
| 1287 | LRRC1     | -1.04 | 7.31E-02 | 2.52E-01 | 1496.30  | not significant |
| 1288 | SLC25A17  | -1.04 | 6.48E-02 | 2.33E-01 | 1539.03  | not significant |
| 1289 | UBN1      | -1.04 | 3.62E-02 | 1.59E-01 | 4860.75  | not significant |
| 1290 | KLF16     | -1.04 | 7.00E-02 | 2.45E-01 | 1552.14  | not significant |
| 1291 | PRPF40A   | -1.04 | 1.69E-02 | 9.60E-02 | 6809.72  | not significant |
| 1292 | PNPO      | -1.04 | 5.57E-02 | 2.11E-01 | 2244.18  | not significant |
| 1293 | AKR1B1    | -1.04 | 3.39E-02 | 1.51E-01 | 4455.30  | not significant |
| 1294 | CASP3     | -1.04 | 2.42E-02 | 1.22E-01 | 5869.30  | not significant |
| 1295 | MMACHC    | -1.04 | 8.49E-02 | 2.77E-01 | 535.92   | not significant |
| 1296 | PNP       | -1.04 | 3.52E-02 | 1.56E-01 | 4567.97  | not significant |
| 1297 | TRMT12    | -1.04 | 8.66E-02 | 2.81E-01 | 554.11   | not significant |
| 1298 | ACTN1     | -1.04 | 8.54E-02 | 2.78E-01 | 845.96   | not significant |
| 1299 | AKIRIN1   | -1.04 | 4.86E-02 | 1.93E-01 | 2536.01  | not significant |
| 1300 | ZC3H4     | -1.04 | 4.99E-02 | 1.97E-01 | 3587.64  | not significant |
| 1301 | EPT1      | -1.04 | 4.24E-02 | 1.76E-01 | 4898.73  | not significant |
| 1302 | CNP       | -1.04 | 8.31E-02 | 2.73E-01 | 419.43   | not significant |
| 1303 | MRPS18C   | -1.04 | 8.54E-02 | 2.78E-01 | 886.79   | not significant |
| 1304 | TBC1D20   | -1.04 | 5.01E-02 | 1.97E-01 | 2364.53  | not significant |
| 1305 | DYNLL2    | -1.04 | 3.00E-02 | 1.40E-01 | 5672.89  | not significant |
| 1306 | G3BP2     | -1.04 | 1.61E-02 | 9.29E-02 | 8605.18  | not significant |
| 1307 | STS       | -1.04 | 8.71E-02 | 2.82E-01 | 825.67   | not significant |

|      |          |       |          |          |          |                 |
|------|----------|-------|----------|----------|----------|-----------------|
| 1308 | SORBS2   | -1.04 | 4.03E-02 | 1.70E-01 | 151.93   | not significant |
| 1309 | DCLRE1C  | -1.04 | 8.44E-02 | 2.76E-01 | 1262.00  | not significant |
| 1310 | TSTA3    | -1.04 | 6.81E-02 | 2.41E-01 | 1859.11  | not significant |
| 1311 | TERF1    | -1.04 | 5.55E-02 | 2.11E-01 | 2097.05  | not significant |
| 1312 | MTMR4    | -1.04 | 3.14E-02 | 1.44E-01 | 4552.08  | not significant |
| 1313 | QTRTD1   | -1.04 | 6.77E-02 | 2.40E-01 | 1851.08  | not significant |
| 1314 | MALT1    | -1.04 | 7.98E-02 | 2.67E-01 | 1238.24  | not significant |
| 1315 | FBL      | -1.04 | 5.13E-02 | 2.00E-01 | 8771.04  | not significant |
| 1316 | KATNA1   | -1.04 | 8.86E-02 | 2.85E-01 | 866.87   | not significant |
| 1317 | NFYC     | -1.04 | 6.69E-02 | 2.38E-01 | 1905.81  | not significant |
| 1318 | ZNF592   | -1.04 | 6.89E-02 | 2.42E-01 | 1818.64  | not significant |
| 1319 | NET1     | -1.04 | 4.78E-02 | 1.91E-01 | 2557.82  | not significant |
| 1320 | MFAP3    | -1.04 | 5.24E-02 | 2.03E-01 | 2279.18  | not significant |
| 1321 | TUBA1B   | -1.04 | 3.00E-02 | 1.40E-01 | 57429.41 | not significant |
| 1322 | UBE3A    | -1.04 | 3.15E-02 | 1.44E-01 | 4772.75  | not significant |
| 1323 | UBE2F    | -1.04 | 9.04E-02 | 2.88E-01 | 733.61   | not significant |
| 1324 | KIAA0040 | -1.04 | 8.27E-02 | 2.73E-01 | 1000.22  | not significant |
| 1325 | STXBP3   | -1.04 | 6.61E-02 | 2.36E-01 | 1592.91  | not significant |
| 1326 | DDHD1    | -1.04 | 7.70E-02 | 2.60E-01 | 2381.95  | not significant |
| 1327 | ERI3     | -1.04 | 7.76E-02 | 2.61E-01 | 1753.07  | not significant |
| 1328 | MAP7D3   | -1.04 | 7.17E-02 | 2.49E-01 | 1732.50  | not significant |
| 1329 | TBC1D5   | -1.04 | 5.46E-02 | 2.09E-01 | 4400.04  | not significant |
| 1330 | MYC      | -1.04 | 1.87E-02 | 1.02E-01 | 9908.72  | not significant |
| 1331 | CXorf38  | -1.04 | 7.18E-02 | 2.49E-01 | 1438.17  | not significant |
| 1332 | HTT      | -1.04 | 5.73E-02 | 2.16E-01 | 4133.39  | not significant |
| 1333 | NRAS     | -1.04 | 1.48E-02 | 8.80E-02 | 9119.57  | not significant |
| 1334 | RBM12    | -1.04 | 2.16E-02 | 1.13E-01 | 6724.22  | not significant |
| 1335 | ZSCAN25  | -1.04 | 6.67E-02 | 2.37E-01 | 1734.88  | not significant |
| 1336 | KIF18B   | -1.04 | 4.96E-02 | 1.96E-01 | 3595.45  | not significant |
| 1337 | CCT7     | -1.04 | 1.62E-02 | 9.33E-02 | 18068.38 | not significant |
| 1338 | NUP188   | -1.04 | 4.49E-02 | 1.84E-01 | 5813.25  | not significant |
| 1339 | NLN      | -1.04 | 7.36E-02 | 2.53E-01 | 1693.30  | not significant |
| 1340 | ZRANB1   | -1.04 | 6.56E-02 | 2.35E-01 | 1672.56  | not significant |
| 1341 | TFDP1    | -1.04 | 1.81E-02 | 1.00E-01 | 11639.42 | not significant |
| 1342 | WDFY1    | -1.04 | 8.65E-02 | 2.81E-01 | 1242.50  | not significant |
| 1343 | RANGRF   | -1.04 | 7.55E-02 | 2.57E-01 | 1965.44  | not significant |
| 1344 | EHD1     | -1.04 | 5.25E-02 | 2.03E-01 | 3359.20  | not significant |
| 1345 | SS18L2   | -1.04 | 9.00E-02 | 2.87E-01 | 916.37   | not significant |
| 1346 | CEBPZOS  | -1.04 | 7.50E-02 | 2.55E-01 | 1354.29  | not significant |
| 1347 | ACBD3    | -1.04 | 6.86E-02 | 2.42E-01 | 1551.61  | not significant |
| 1348 | MBD1     | -1.04 | 3.96E-02 | 1.69E-01 | 3499.81  | not significant |
| 1349 | GABPB2   | -1.04 | 7.19E-02 | 2.49E-01 | 283.92   | not significant |
| 1350 | CYC1     | -1.04 | 5.49E-02 | 2.09E-01 | 5676.26  | not significant |
| 1351 | HNRNPH3  | -1.04 | 2.89E-02 | 1.37E-01 | 8217.58  | not significant |
| 1352 | PHF20L1  | -1.04 | 2.97E-02 | 1.39E-01 | 5289.90  | not significant |
| 1353 | BCL9L    | -1.04 | 9.41E-02 | 2.96E-01 | 883.63   | not significant |
| 1354 | PLIN2    | -1.04 | 5.97E-02 | 2.21E-01 | 2166.81  | not significant |
| 1355 | PDCD6IP  | -1.04 | 4.85E-02 | 1.93E-01 | 4086.43  | not significant |
| 1356 | CCAR1    | -1.04 | 3.20E-02 | 1.46E-01 | 6379.28  | not significant |
| 1357 | HNRNPU   | -1.04 | 1.50E-02 | 8.89E-02 | 42179.04 | not significant |
| 1358 | FGD6     | -1.04 | 8.45E-02 | 2.76E-01 | 412.46   | not significant |
| 1359 | MAZ      | -1.04 | 2.91E-02 | 1.37E-01 | 17478.88 | not significant |
| 1360 | FXN      | -1.04 | 6.83E-02 | 2.41E-01 | 234.39   | not significant |
| 1361 | PARL     | -1.04 | 6.74E-02 | 2.39E-01 | 1667.17  | not significant |
| 1362 | KDM2A    | -1.04 | 3.82E-02 | 1.64E-01 | 5222.46  | not significant |
| 1363 | PQBP1    | -1.04 | 9.36E-02 | 2.95E-01 | 556.88   | not significant |
| 1364 | ITPKC    | -1.04 | 8.60E-02 | 2.80E-01 | 347.55   | not significant |
| 1365 | COG7     | -1.04 | 9.58E-02 | 2.99E-01 | 645.16   | not significant |
| 1366 | AKIRIN2  | -1.04 | 8.44E-02 | 2.76E-01 | 1123.00  | not significant |
| 1367 | CISH     | -1.04 | 1.22E-02 | 7.62E-02 | 14908.98 | not significant |
| 1368 | RRP1     | -1.04 | 9.21E-02 | 2.92E-01 | 1137.11  | not significant |
| 1369 | ABAT     | -1.04 | 9.55E-02 | 2.99E-01 | 624.96   | not significant |
| 1370 | SENP1    | -1.04 | 5.51E-02 | 2.10E-01 | 3819.26  | not significant |
| 1371 | KCNAB2   | -1.04 | 1.51E-02 | 8.90E-02 | 9256.56  | not significant |
| 1372 | SLC2A3   | -1.04 | 9.55E-02 | 2.99E-01 | 959.09   | not significant |
| 1373 | SMYD3    | -1.04 | 8.94E-02 | 2.86E-01 | 1085.78  | not significant |
| 1374 | VPS35    | -1.04 | 3.40E-02 | 1.52E-01 | 5224.11  | not significant |
| 1375 | MRPS9    | -1.04 | 8.14E-02 | 2.70E-01 | 1276.20  | not significant |
| 1376 | SLC35B4  | -1.04 | 6.18E-02 | 2.26E-01 | 3193.92  | not significant |
| 1377 | PHF14    | -1.04 | 4.30E-02 | 1.79E-01 | 3367.03  | not significant |
| 1378 | FGD5     | -1.04 | 9.82E-02 | 3.05E-01 | 644.99   | not significant |
| 1379 | HDAC3    | -1.04 | 5.19E-02 | 2.02E-01 | 2695.08  | not significant |
| 1380 | DR1      | -1.04 | 2.50E-02 | 1.25E-01 | 7015.03  | not significant |
| 1381 | ALKBH3   | -1.04 | 8.75E-02 | 2.83E-01 | 1104.40  | not significant |
| 1382 | LIMD1    | -1.04 | 4.01E-02 | 1.70E-01 | 3684.42  | not significant |
| 1383 | TBCD     | -1.04 | 1.99E-02 | 1.06E-01 | 8062.11  | not significant |
| 1384 | CPS1     | -1.04 | 4.73E-02 | 1.89E-01 | 165.02   | not significant |
| 1385 | ZNF814   | -1.04 | 9.41E-02 | 2.96E-01 | 626.00   | not significant |
| 1386 | CISD1    | -1.04 | 8.93E-02 | 2.86E-01 | 1103.34  | not significant |
| 1387 | ZNF587   | -1.04 | 9.59E-02 | 2.99E-01 | 1000.67  | not significant |
| 1388 | ARID2    | -1.04 | 7.14E-02 | 2.48E-01 | 4546.19  | not significant |
| 1389 | RNF166   | -1.04 | 7.84E-02 | 2.63E-01 | 1440.42  | not significant |
| 1390 | GATAD2A  | -1.04 | 1.68E-02 | 9.54E-02 | 9644.98  | not significant |
| 1391 | DYRK4    | -1.04 | 9.84E-02 | 3.05E-01 | 613.73   | not significant |
| 1392 | GPN1     | -1.04 | 7.15E-02 | 2.49E-01 | 1856.85  | not significant |
| 1393 | STK17A   | -1.04 | 5.38E-02 | 2.07E-01 | 3416.90  | not significant |
| 1394 | HNRNPD   | -1.04 | 2.33E-02 | 1.19E-01 | 21309.32 | not significant |
| 1395 | RIC8A    | -1.04 | 4.23E-02 | 1.76E-01 | 3884.83  | not significant |

|      |          |       |          |          |          |                 |
|------|----------|-------|----------|----------|----------|-----------------|
| 1396 | POLG     | -1.04 | 3.67E-02 | 1.60E-01 | 4769.87  | not significant |
| 1397 | UMODL1   | -1.04 | 1.13E-02 | NA       | 74.18    | not significant |
| 1398 | PSMA6    | -1.04 | 3.17E-02 | 1.45E-01 | 8289.73  | not significant |
| 1399 | MAT2A    | -1.04 | 2.56E-02 | 1.27E-01 | 15053.92 | not significant |
| 1400 | SLC6A20  | -1.04 | 6.37E-02 | 2.30E-01 | 206.45   | not significant |
| 1401 | ZNF174   | -1.04 | 9.58E-02 | 2.99E-01 | 542.19   | not significant |
| 1402 | TUBB4A   | -1.04 | 5.62E-02 | 2.13E-01 | 172.60   | not significant |
| 1403 | AMMECR1  | -1.04 | 9.22E-02 | 2.92E-01 | 491.55   | not significant |
| 1404 | SRSF3    | -1.04 | 2.63E-02 | 1.29E-01 | 19819.45 | not significant |
| 1405 | RNF8     | -1.04 | 9.02E-02 | 2.87E-01 | 1320.70  | not significant |
| 1406 | ASB8     | -1.04 | 8.29E-02 | 2.73E-01 | 1431.74  | not significant |
| 1407 | PPID     | -1.04 | 7.39E-02 | 2.53E-01 | 2552.92  | not significant |
| 1408 | MEPCE    | -1.04 | 4.32E-02 | 1.79E-01 | 3789.54  | not significant |
| 1409 | MPHOSPH8 | -1.04 | 7.44E-02 | 2.54E-01 | 1768.51  | not significant |
| 1410 | KIFC1    | -1.04 | 8.20E-02 | 2.71E-01 | 1463.90  | not significant |
| 1411 | CRCP     | -1.04 | 6.21E-02 | 2.26E-01 | 2254.42  | not significant |
| 1412 | UBTF     | -1.04 | 2.22E-02 | 1.15E-01 | 9719.60  | not significant |
| 1413 | RBM41    | -1.04 | 1.00E-01 | 3.09E-01 | 765.86   | not significant |
| 1414 | LRRC8D   | -1.04 | 8.11E-02 | 2.69E-01 | 1663.26  | not significant |
| 1415 | ATXN7L3  | -1.04 | 4.40E-02 | 1.81E-01 | 3545.17  | not significant |
| 1416 | MORC2    | -1.04 | 6.96E-02 | 2.44E-01 | 1919.93  | not significant |
| 1417 | CARM1    | -1.04 | 5.11E-02 | 2.00E-01 | 3726.86  | not significant |
| 1418 | POGLUT1  | -1.04 | 9.41E-02 | 2.96E-01 | 1366.27  | not significant |
| 1419 | ACTR3    | -1.04 | 2.12E-02 | 1.12E-01 | 10483.27 | not significant |
| 1420 | IDH3B    | -1.04 | 6.74E-02 | 2.39E-01 | 3519.26  | not significant |
| 1421 | PRMT3    | -1.04 | 8.81E-02 | 2.84E-01 | 1483.06  | not significant |
| 1422 | DYRK1A   | -1.04 | 4.58E-02 | 1.86E-01 | 3785.40  | not significant |
| 1423 | NOL11    | -1.04 | 3.04E-02 | 1.41E-01 | 6832.02  | not significant |
| 1424 | SPNS2    | -1.04 | 2.75E-02 | 1.32E-01 | 143.17   | not significant |
| 1425 | UTP18    | -1.04 | 6.27E-02 | 2.28E-01 | 2759.82  | not significant |
| 1426 | ODF2     | -1.04 | 4.71E-02 | 1.89E-01 | 3425.81  | not significant |
| 1427 | PSMD3    | -1.04 | 2.37E-02 | 1.21E-01 | 8798.58  | not significant |
| 1428 | XPNPEP3  | -1.04 | 9.86E-02 | 3.06E-01 | 492.87   | not significant |
| 1429 | AIMP2    | -1.04 | 7.89E-02 | 2.64E-01 | 1815.38  | not significant |
| 1430 | DDX3X    | -1.04 | 2.82E-02 | 1.35E-01 | 14427.53 | not significant |
| 1431 | MPZL3    | -1.04 | 5.79E-02 | 2.17E-01 | 189.99   | not significant |
| 1432 | FOCAD    | -1.04 | 8.82E-02 | 2.84E-01 | 1328.80  | not significant |
| 1433 | SETD8    | -1.04 | 7.94E-02 | 2.66E-01 | 2028.89  | not significant |
| 1434 | RNF26    | -1.04 | 7.27E-02 | 2.51E-01 | 1888.47  | not significant |
| 1435 | DCP1A    | -1.04 | 8.19E-02 | 2.71E-01 | 324.15   | not significant |
| 1436 | SNHG3    | -1.04 | 8.39E-02 | 2.75E-01 | 2639.43  | not significant |
| 1437 | C21orf59 | -1.04 | 7.58E-02 | 2.57E-01 | 2272.21  | not significant |
| 1438 | RGS14    | -1.04 | 8.49E-02 | 2.77E-01 | 1541.28  | not significant |
| 1439 | MAP4K1   | -1.04 | 7.15E-02 | 2.49E-01 | 2601.57  | not significant |
| 1440 | RPS6KB1  | -1.04 | 5.11E-02 | 2.00E-01 | 3674.60  | not significant |
| 1441 | COG3     | -1.04 | 9.11E-02 | 2.89E-01 | 1373.34  | not significant |
| 1442 | USP47    | -1.04 | 7.20E-02 | 2.49E-01 | 3880.54  | not significant |
| 1443 | ATMIN    | -1.04 | 7.06E-02 | 2.46E-01 | 2143.76  | not significant |
| 1444 | TTC26    | -1.04 | 1.06E-01 | 3.20E-01 | 673.97   | not significant |
| 1445 | AGO2     | -1.04 | 1.06E-01 | 3.20E-01 | 1246.33  | not significant |
| 1446 | KCTD2    | -1.04 | 7.23E-02 | 2.50E-01 | 2202.48  | not significant |
| 1447 | EFHD2    | -1.04 | 7.23E-02 | 2.50E-01 | 2912.95  | not significant |
| 1448 | SLMAP    | -1.04 | 7.14E-02 | 2.48E-01 | 2081.07  | not significant |
| 1449 | BAP1     | -1.04 | 3.80E-02 | 1.64E-01 | 5311.38  | not significant |
| 1450 | PPP6R1   | -1.04 | 1.60E-02 | 9.29E-02 | 18886.25 | not significant |
| 1451 | MTX1     | -1.04 | 1.02E-01 | 3.11E-01 | 474.24   | not significant |
| 1452 | PPIP5K2  | -1.04 | 8.87E-02 | 2.85E-01 | 1472.06  | not significant |
| 1453 | PRPF6    | -1.04 | 5.66E-02 | 2.13E-01 | 3696.80  | not significant |
| 1454 | PIIG     | -1.04 | 6.54E-02 | 2.34E-01 | 3068.92  | not significant |
| 1455 | NUP214   | -1.04 | 9.12E-02 | 2.89E-01 | 3117.44  | not significant |
| 1456 | PSMC4    | -1.04 | 4.87E-02 | 1.94E-01 | 5013.29  | not significant |
| 1457 | XRCC6    | -1.04 | 3.26E-02 | 1.47E-01 | 22199.72 | not significant |
| 1458 | PUM2     | -1.04 | 2.84E-02 | 1.35E-01 | 9412.40  | not significant |
| 1459 | POC5     | -1.04 | 1.09E-01 | 3.25E-01 | 850.79   | not significant |
| 1460 | EPHB1    | -1.04 | 7.44E-02 | 2.54E-01 | 233.73   | not significant |
| 1461 | CYHR1    | -1.04 | 1.09E-01 | 3.25E-01 | 724.95   | not significant |
| 1462 | PPP1R3B  | -1.04 | 1.06E-01 | 3.19E-01 | 516.71   | not significant |
| 1463 | TRDMT1   | -1.04 | 1.09E-01 | 3.26E-01 | 776.31   | not significant |
| 1464 | EIF4E    | -1.04 | 1.00E-01 | 3.09E-01 | 1515.52  | not significant |
| 1465 | CMSS1    | -1.04 | 8.83E-02 | 2.84E-01 | 2097.84  | not significant |
| 1466 | TAF6     | -1.04 | 4.34E-02 | 1.80E-01 | 4238.05  | not significant |
| 1467 | NANS     | -1.04 | 1.11E-01 | 3.29E-01 | 664.13   | not significant |
| 1468 | PSMD10   | -1.04 | 1.02E-01 | 3.11E-01 | 1358.26  | not significant |
| 1469 | ZNF609   | -1.04 | 8.38E-02 | 2.75E-01 | 2867.03  | not significant |
| 1470 | IPO13    | -1.04 | 8.06E-02 | 2.68E-01 | 1861.08  | not significant |
| 1471 | CAP1     | -1.04 | 2.13E-02 | 1.12E-01 | 10656.08 | not significant |
| 1472 | ARMC1    | -1.04 | 5.70E-02 | 2.15E-01 | 4140.90  | not significant |
| 1473 | PGK1     | -1.04 | 3.63E-02 | 1.59E-01 | 14050.24 | not significant |
| 1474 | SF3B3    | -1.04 | 1.55E-02 | 9.09E-02 | 14685.47 | not significant |
| 1475 | NHEJ1    | -1.04 | 1.11E-01 | 3.29E-01 | 712.77   | not significant |
| 1476 | ACOT7    | -1.04 | 5.34E-02 | 2.06E-01 | 6932.40  | not significant |
| 1477 | BATF     | -1.04 | 1.12E-01 | 3.31E-01 | 879.93   | not significant |
| 1478 | MOSPD1   | -1.04 | 1.28E-01 | 3.59E-01 | 587.24   | not significant |
| 1479 | FGFR1OP  | -1.04 | 9.86E-02 | 3.05E-01 | 1268.17  | not significant |
| 1480 | ICMT     | -1.04 | 3.64E-02 | 1.59E-01 | 7489.01  | not significant |
| 1481 | CBFB     | -1.04 | 2.47E-02 | 1.24E-01 | 10797.61 | not significant |
| 1482 | ACTR2    | -1.04 | 1.29E-02 | 7.93E-02 | 18394.38 | not significant |
| 1483 | NOSIP    | -1.04 | 1.08E-01 | 3.23E-01 | 1581.76  | not significant |

|      |           |       |          |          |          |                 |
|------|-----------|-------|----------|----------|----------|-----------------|
| 1484 | GEN1      | -1.04 | 1.06E-01 | 3.19E-01 | 2024.50  | not significant |
| 1485 | CALM3     | -1.04 | 3.73E-02 | 1.62E-01 | 17252.11 | not significant |
| 1486 | RAF1      | -1.04 | 3.20E-02 | 1.46E-01 | 5833.42  | not significant |
| 1487 | GTF2F2    | -1.04 | 9.73E-02 | 3.03E-01 | 1551.57  | not significant |
| 1488 | SUV420H1  | -1.04 | 1.00E-01 | 3.09E-01 | 1271.38  | not significant |
| 1489 | MOB1B     | -1.04 | 6.31E-02 | 2.29E-01 | 4253.73  | not significant |
| 1490 | HSP90AB1  | -1.04 | 1.12E-02 | 7.21E-02 | 78889.81 | not significant |
| 1491 | FHL2      | -1.04 | 8.36E-02 | 2.75E-01 | 257.80   | not significant |
| 1492 | KCTD10    | -1.04 | 6.35E-02 | 2.29E-01 | 3107.47  | not significant |
| 1493 | PTPN1     | -1.04 | 4.38E-02 | 1.81E-01 | 4307.91  | not significant |
| 1494 | GNAQ      | -1.04 | 5.02E-02 | 1.98E-01 | 5281.43  | not significant |
| 1495 | CCDC112   | -1.04 | 1.01E-01 | 3.09E-01 | 390.95   | not significant |
| 1496 | UTP14C    | -1.04 | 1.05E-01 | 3.17E-01 | 1276.29  | not significant |
| 1497 | PPIL2     | -1.04 | 6.50E-02 | 2.33E-01 | 2849.22  | not significant |
| 1498 | GNB4      | -1.04 | 4.07E-02 | 1.71E-01 | 5418.66  | not significant |
| 1499 | FLAD1     | -1.04 | 1.06E-01 | 3.20E-01 | 1037.66  | not significant |
| 1500 | TSR2      | -1.04 | 9.25E-02 | 2.92E-01 | 1616.58  | not significant |
| 1501 | STRBP     | -1.04 | 7.00E-02 | 2.45E-01 | 2717.54  | not significant |
| 1502 | NUP43     | -1.04 | 6.37E-02 | 2.30E-01 | 3123.89  | not significant |
| 1503 | ASRGL1    | -1.04 | 8.88E-02 | 2.85E-01 | 1736.22  | not significant |
| 1504 | CDC23     | -1.04 | 6.14E-02 | 2.25E-01 | 3024.58  | not significant |
| 1505 | HNRNPR    | -1.04 | 2.48E-02 | 1.24E-01 | 17702.80 | not significant |
| 1506 | AP3D1     | -1.04 | 3.23E-02 | 1.47E-01 | 6470.37  | not significant |
| 1507 | TMEM126A  | -1.04 | 1.14E-01 | 3.35E-01 | 799.26   | not significant |
| 1508 | BOLA3     | -1.04 | 1.11E-01 | 3.28E-01 | 1103.54  | not significant |
| 1509 | VDAC2     | -1.04 | 1.01E-01 | 3.09E-01 | 1793.13  | not significant |
| 1510 | LRRC28    | -1.04 | 1.15E-01 | 3.35E-01 | 916.77   | not significant |
| 1511 | HOMER1    | -1.04 | 1.02E-01 | 3.11E-01 | 1240.16  | not significant |
| 1512 | TUBGCP2   | -1.04 | 7.08E-02 | 2.47E-01 | 2440.29  | not significant |
| 1513 | RCHY1     | -1.04 | 1.03E-01 | 3.14E-01 | 1338.68  | not significant |
| 1514 | CASP7     | -1.04 | 8.86E-02 | 2.85E-01 | 1692.28  | not significant |
| 1515 | NDUFA5    | -1.04 | 8.80E-02 | 2.84E-01 | 2548.40  | not significant |
| 1516 | RPAP1     | -1.04 | 8.74E-02 | 2.83E-01 | 1839.69  | not significant |
| 1517 | MANF      | -1.04 | 1.09E-01 | 3.25E-01 | 1330.20  | not significant |
| 1518 | FDXR      | -1.04 | 1.15E-01 | 3.35E-01 | 831.73   | not significant |
| 1519 | ETFA      | -1.04 | 8.68E-02 | 2.82E-01 | 3148.90  | not significant |
| 1520 | PIGT      | -1.04 | 7.05E-02 | 2.46E-01 | 3271.78  | not significant |
| 1521 | AGFG1     | -1.04 | 5.94E-02 | 2.20E-01 | 3747.12  | not significant |
| 1522 | KANSL3    | -1.04 | 4.06E-02 | 1.71E-01 | 5686.59  | not significant |
| 1523 | HS6ST1    | -1.04 | 3.74E-02 | 1.62E-01 | 6115.11  | not significant |
| 1524 | AP3S1     | -1.04 | 9.70E-02 | 3.02E-01 | 2205.39  | not significant |
| 1525 | LINC01420 | -1.04 | 1.14E-01 | 3.35E-01 | 1077.43  | not significant |
| 1526 | C1orf198  | -1.04 | 1.15E-01 | 3.36E-01 | 854.68   | not significant |
| 1527 | NIPA2     | -1.04 | 5.88E-02 | 2.19E-01 | 3650.87  | not significant |
| 1528 | HNRNPK    | -1.04 | 2.15E-02 | 1.13E-01 | 34184.53 | not significant |
| 1529 | ZNF829    | -1.04 | 8.56E-02 | 2.79E-01 | 280.67   | not significant |
| 1530 | INTS6     | -1.04 | 1.03E-01 | 3.13E-01 | 1624.84  | not significant |
| 1531 | VDAC1     | -1.04 | 3.39E-02 | 1.51E-01 | 8795.20  | not significant |
| 1532 | LINC01132 | -1.04 | 9.72E-02 | 3.02E-01 | 417.08   | not significant |
| 1533 | FBXO41    | -1.04 | 8.45E-02 | 2.76E-01 | 2650.60  | not significant |
| 1534 | CAPRIN1   | -1.04 | 2.92E-02 | 1.38E-01 | 19819.25 | not significant |
| 1535 | SBNO1     | -1.04 | 6.51E-02 | 2.33E-01 | 4982.14  | not significant |
| 1536 | PARS2     | -1.04 | 9.09E-02 | 2.89E-01 | 274.08   | not significant |
| 1537 | ZMYM6     | -1.04 | 1.19E-01 | 3.43E-01 | 932.26   | not significant |
| 1538 | PCYT1A    | -1.04 | 1.20E-01 | 3.45E-01 | 668.57   | not significant |
| 1539 | GTF2A2    | -1.04 | 1.10E-01 | 3.27E-01 | 1426.64  | not significant |
| 1540 | PSPC1     | -1.04 | 9.88E-02 | 3.06E-01 | 1598.69  | not significant |
| 1541 | NCDN      | -1.04 | 9.36E-02 | 2.95E-01 | 1700.92  | not significant |
| 1542 | NPEPPS    | -1.04 | 6.09E-02 | 2.23E-01 | 3388.11  | not significant |
| 1543 | POLA1     | -1.04 | 6.61E-02 | 2.36E-01 | 4809.71  | not significant |
| 1544 | PPME1     | -1.04 | 9.97E-02 | 3.08E-01 | 1563.89  | not significant |
| 1545 | PYCR1     | -1.04 | 8.66E-02 | 2.81E-01 | 2253.11  | not significant |
| 1546 | FBXO45    | -1.04 | 7.65E-02 | 2.59E-01 | 2749.77  | not significant |
| 1547 | TMOD3     | -1.04 | 8.73E-02 | 2.83E-01 | 3121.20  | not significant |
| 1548 | MTA2      | -1.04 | 2.53E-02 | 1.26E-01 | 9492.48  | not significant |
| 1549 | NARS      | -1.04 | 2.83E-02 | 1.35E-01 | 9668.44  | not significant |
| 1550 | PTBP1     | -1.04 | 2.05E-02 | 1.09E-01 | 27546.09 | not significant |
| 1551 | SLC25A46  | -1.04 | 7.31E-02 | 2.52E-01 | 2945.62  | not significant |
| 1552 | PDLIM2    | -1.04 | 1.09E-01 | 3.26E-01 | 1505.75  | not significant |
| 1553 | UBA5      | -1.04 | 9.44E-02 | 2.96E-01 | 1959.98  | not significant |
| 1554 | AREL1     | -1.04 | 7.58E-02 | 2.57E-01 | 2973.55  | not significant |
| 1555 | ADAM19    | -1.04 | 5.50E-02 | 2.10E-01 | 12167.70 | not significant |
| 1556 | CPSF2     | -1.04 | 4.48E-02 | 1.84E-01 | 5681.76  | not significant |
| 1557 | DICER1    | -1.04 | 8.97E-02 | 2.87E-01 | 6383.48  | not significant |
| 1558 | FIP1L1    | -1.04 | 8.21E-02 | 2.71E-01 | 3032.30  | not significant |
| 1559 | RAD23B    | -1.04 | 6.15E-02 | 2.25E-01 | 5640.16  | not significant |
| 1560 | TMEM167A  | -1.04 | 4.63E-02 | 1.87E-01 | 4861.10  | not significant |
| 1561 | ZFYVE21   | -1.04 | 1.17E-01 | 3.40E-01 | 493.48   | not significant |
| 1562 | IQCB1     | -1.04 | 1.08E-01 | 3.24E-01 | 1378.18  | not significant |
| 1563 | ADH5      | -1.04 | 7.73E-02 | 2.61E-01 | 3975.31  | not significant |
| 1564 | UBE2D3    | -1.04 | 4.73E-02 | 1.89E-01 | 14661.71 | not significant |
| 1565 | RAB30     | -1.04 | 6.40E-02 | 2.30E-01 | 184.22   | not significant |
| 1566 | CENPP     | -1.04 | 1.18E-01 | 3.40E-01 | 561.46   | not significant |
| 1567 | TRMT13    | -1.04 | 1.16E-01 | 3.37E-01 | 1259.71  | not significant |
| 1568 | THAP11    | -1.04 | 1.03E-01 | 3.13E-01 | 2221.63  | not significant |
| 1569 | MLEC      | -1.04 | 4.95E-02 | 1.96E-01 | 16772.72 | not significant |
| 1570 | DYNLRB1   | -1.04 | 8.46E-02 | 2.76E-01 | 2887.18  | not significant |
| 1571 | LATS1     | -1.04 | 1.03E-01 | 3.13E-01 | 1801.98  | not significant |

|      |          |       |          |          |          |                 |
|------|----------|-------|----------|----------|----------|-----------------|
| 1572 | NUP88    | -1.04 | 8.52E-02 | 2.78E-01 | 2214.76  | not significant |
| 1573 | AP1B1    | -1.04 | 4.42E-02 | 1.82E-01 | 6279.98  | not significant |
| 1574 | KDM1A    | -1.04 | 3.52E-02 | 1.56E-01 | 6724.29  | not significant |
| 1575 | BRIX1    | -1.04 | 8.41E-02 | 2.76E-01 | 2688.23  | not significant |
| 1576 | MKRN2    | -1.04 | 8.78E-02 | 2.83E-01 | 2488.16  | not significant |
| 1577 | PRKCH    | -1.04 | 2.44E-02 | 1.23E-01 | 13590.72 | not significant |
| 1578 | CD63     | -1.04 | 1.01E-01 | 3.09E-01 | 2510.22  | not significant |
| 1579 | SDHB     | -1.04 | 1.06E-01 | 3.20E-01 | 3175.65  | not significant |
| 1580 | DIMT1    | -1.04 | 1.11E-01 | 3.29E-01 | 1306.32  | not significant |
| 1581 | PRMT7    | -1.04 | 1.02E-01 | 3.11E-01 | 1609.73  | not significant |
| 1582 | FASTKD1  | -1.04 | 1.02E-01 | 3.12E-01 | 1592.63  | not significant |
| 1583 | EPB41L2  | -1.04 | 8.45E-02 | 2.76E-01 | 4015.57  | not significant |
| 1584 | NDUFC2   | -1.04 | 1.23E-01 | 3.52E-01 | 1024.94  | not significant |
| 1585 | SRP14    | -1.04 | 8.98E-02 | 2.87E-01 | 5366.01  | not significant |
| 1586 | RPRD1A   | -1.04 | 8.95E-02 | 2.86E-01 | 2286.54  | not significant |
| 1587 | YY1AP1   | -1.04 | 8.95E-02 | 2.86E-01 | 2137.93  | not significant |
| 1588 | LGALS8   | -1.04 | 1.03E-01 | 3.13E-01 | 1994.38  | not significant |
| 1589 | XPO1     | -1.04 | 3.78E-02 | 1.63E-01 | 20347.66 | not significant |
| 1590 | RTN4IP1  | -1.04 | 7.82E-02 | 2.63E-01 | 210.58   | not significant |
| 1591 | ARHGEF7  | -1.04 | 7.02E-02 | 2.46E-01 | 3272.78  | not significant |
| 1592 | TMED5    | -1.04 | 4.28E-02 | 1.78E-01 | 6462.77  | not significant |
| 1593 | ATP5I    | -1.04 | 1.17E-01 | 3.39E-01 | 2119.69  | not significant |
| 1594 | HSPA4L   | -1.04 | 1.13E-01 | 3.33E-01 | 1382.72  | not significant |
| 1595 | RAB5C    | -1.04 | 9.67E-02 | 3.02E-01 | 2024.12  | not significant |
| 1596 | PRDX1    | -1.04 | 5.70E-02 | 2.15E-01 | 15509.13 | not significant |
| 1597 | RBMX     | -1.04 | 2.38E-02 | 1.21E-01 | 17136.97 | not significant |
| 1598 | RYK      | -1.04 | 1.15E-01 | 3.36E-01 | 1232.05  | not significant |
| 1599 | NSFL1C   | -1.04 | 7.57E-02 | 2.57E-01 | 2768.01  | not significant |
| 1600 | NOMO3    | -1.04 | 5.09E-02 | 1.99E-01 | 137.56   | not significant |
| 1601 | CCDC58   | -1.04 | 1.29E-01 | 3.61E-01 | 863.74   | not significant |
| 1602 | CLPX     | -1.04 | 1.16E-01 | 3.37E-01 | 1291.03  | not significant |
| 1603 | DRG1     | -1.04 | 8.14E-02 | 2.70E-01 | 2725.96  | not significant |
| 1604 | IKBKAP   | -1.04 | 8.56E-02 | 2.79E-01 | 2373.96  | not significant |
| 1605 | GLYR1    | -1.04 | 5.96E-02 | 2.21E-01 | 3911.05  | not significant |
| 1606 | NUPL2    | -1.04 | 1.14E-01 | 3.35E-01 | 1071.69  | not significant |
| 1607 | RHBDD3   | -1.04 | 1.21E-01 | 3.47E-01 | 1197.94  | not significant |
| 1608 | PIP4K2B  | -1.04 | 5.74E-02 | 2.16E-01 | 6043.69  | not significant |
| 1609 | ARPP19   | -1.04 | 3.20E-02 | 1.46E-01 | 9458.38  | not significant |
| 1610 | GARS     | -1.04 | 2.89E-02 | 1.37E-01 | 11879.20 | not significant |
| 1611 | HSD17B10 | -1.04 | 1.30E-01 | 3.62E-01 | 1008.32  | not significant |
| 1612 | RCAN1    | -1.04 | 1.17E-01 | 3.39E-01 | 1318.23  | not significant |
| 1613 | SRP54    | -1.04 | 8.24E-02 | 2.72E-01 | 2950.75  | not significant |
| 1614 | INTS10   | -1.04 | 8.85E-02 | 2.85E-01 | 2764.65  | not significant |
| 1615 | GSK3B    | -1.04 | 5.48E-02 | 2.09E-01 | 6522.40  | not significant |
| 1616 | MRPL1    | -1.04 | 1.24E-01 | 3.52E-01 | 1092.34  | not significant |
| 1617 | VWA8     | -1.04 | 1.22E-01 | 3.49E-01 | 1136.49  | not significant |
| 1618 | UBE2E1   | -1.04 | 9.92E-02 | 3.07E-01 | 3149.92  | not significant |
| 1619 | BUB3     | -1.04 | 5.72E-02 | 2.15E-01 | 7771.71  | not significant |
| 1620 | CWC22    | -1.04 | 1.07E-01 | 3.22E-01 | 1546.41  | not significant |
| 1621 | CLEC16A  | -1.04 | 9.58E-02 | 2.99E-01 | 2412.73  | not significant |
| 1622 | ATG5     | -1.04 | 1.04E-01 | 3.16E-01 | 1685.86  | not significant |
| 1623 | NIP7     | -1.04 | 9.12E-02 | 2.89E-01 | 2983.68  | not significant |
| 1624 | MCU      | -1.04 | 1.32E-01 | 3.65E-01 | 847.98   | not significant |
| 1625 | RNF111   | -1.04 | 1.29E-01 | 3.61E-01 | 1219.43  | not significant |
| 1626 | CHMP7    | -1.04 | 7.61E-02 | 2.58E-01 | 3349.29  | not significant |
| 1627 | BCAT1    | -1.04 | 6.94E-02 | 2.44E-01 | 4498.62  | not significant |
| 1628 | EXOSC5   | -1.04 | 1.32E-01 | 3.67E-01 | 889.92   | not significant |
| 1629 | MED29    | -1.04 | 1.13E-01 | 3.32E-01 | 1507.03  | not significant |
| 1630 | EIF3I    | -1.04 | 7.57E-02 | 2.57E-01 | 10081.24 | not significant |
| 1631 | RAB6A    | -1.04 | 6.97E-02 | 2.44E-01 | 3812.34  | not significant |
| 1632 | POLE3    | -1.04 | 5.86E-02 | 2.18E-01 | 7430.03  | not significant |
| 1633 | WDR1     | -1.04 | 3.07E-02 | 1.42E-01 | 13990.57 | not significant |
| 1634 | YRDC     | -1.04 | 1.15E-01 | 3.36E-01 | 1779.29  | not significant |
| 1635 | ZNF142   | -1.04 | 1.16E-01 | 3.38E-01 | 1991.45  | not significant |
| 1636 | C1orf52  | -1.04 | 1.33E-01 | 3.67E-01 | 1057.03  | not significant |
| 1637 | ABL2     | -1.04 | 1.34E-01 | 3.70E-01 | 1114.68  | not significant |
| 1638 | TNRC6A   | -1.04 | 1.23E-01 | 3.50E-01 | 2616.05  | not significant |
| 1639 | PIGG     | -1.04 | 1.26E-01 | 3.56E-01 | 1332.19  | not significant |
| 1640 | EPHX4    | -1.04 | 7.25E-02 | 2.51E-01 | 178.37   | not significant |
| 1641 | TBC1D4   | -1.04 | 1.23E-01 | 3.51E-01 | 1289.01  | not significant |
| 1642 | GDAP2    | -1.04 | 1.36E-01 | 3.73E-01 | 770.39   | not significant |
| 1643 | ARFGEF1  | -1.04 | 7.22E-02 | 2.50E-01 | 4902.18  | not significant |
| 1644 | PRDM2    | -1.04 | 1.33E-01 | 3.67E-01 | 1260.54  | not significant |
| 1645 | GOT1     | -1.04 | 1.16E-01 | 3.38E-01 | 1889.79  | not significant |
| 1646 | GATB     | -1.04 | 1.29E-01 | 3.61E-01 | 796.06   | not significant |
| 1647 | UTP11L   | -1.04 | 1.09E-01 | 3.25E-01 | 2288.76  | not significant |
| 1648 | NAB2     | -1.04 | 1.22E-01 | 3.49E-01 | 1644.90  | not significant |
| 1649 | VAT1     | -1.04 | 1.01E-01 | 3.10E-01 | 2273.64  | not significant |
| 1650 | NF2      | -1.04 | 9.41E-02 | 2.96E-01 | 2530.47  | not significant |
| 1651 | EFCAB14  | -1.04 | 7.29E-02 | 2.51E-01 | 4891.63  | not significant |
| 1652 | ZNF546   | -1.04 | 1.46E-01 | 3.90E-01 | 197.08   | not significant |
| 1653 | SPOPL    | -1.04 | 1.37E-01 | 3.75E-01 | 628.85   | not significant |
| 1654 | KIF2A    | -1.04 | 6.13E-02 | 2.25E-01 | 5266.73  | not significant |
| 1655 | HIC2     | -1.04 | 1.36E-01 | 3.73E-01 | 652.29   | not significant |
| 1656 | RIOK1    | -1.04 | 9.43E-02 | 2.96E-01 | 2840.55  | not significant |
| 1657 | PEX5     | -1.04 | 1.07E-01 | 3.21E-01 | 1911.74  | not significant |
| 1658 | EXOC5    | -1.04 | 7.64E-02 | 2.59E-01 | 5156.44  | not significant |
| 1659 | PAQR3    | -1.03 | 1.13E-01 | 3.32E-01 | 2294.58  | not significant |

|      |              |       |          |          |          |                 |
|------|--------------|-------|----------|----------|----------|-----------------|
| 1660 | POP4         | -1.03 | 1.12E-01 | 3.31E-01 | 2035.76  | not significant |
| 1661 | SUPT4H1      | -1.03 | 7.76E-02 | 2.61E-01 | 6377.82  | not significant |
| 1662 | AGPAT3       | -1.03 | 9.41E-02 | 2.96E-01 | 2745.85  | not significant |
| 1663 | DSE          | -1.03 | 3.64E-02 | 1.59E-01 | 113.95   | not significant |
| 1664 | GPR155       | -1.03 | 1.31E-01 | 3.65E-01 | 482.66   | not significant |
| 1665 | MRPL39       | -1.03 | 1.30E-01 | 3.63E-01 | 1245.13  | not significant |
| 1666 | NLE1         | -1.03 | 1.27E-01 | 3.58E-01 | 1390.14  | not significant |
| 1667 | DHX29        | -1.03 | 1.26E-01 | 3.56E-01 | 1485.22  | not significant |
| 1668 | FAM126A      | -1.03 | 1.17E-01 | 3.39E-01 | 1748.71  | not significant |
| 1669 | MYO1B        | -1.03 | 1.02E-01 | 3.11E-01 | 2264.71  | not significant |
| 1670 | ASCC2        | -1.03 | 7.55E-02 | 2.57E-01 | 3505.29  | not significant |
| 1671 | ZNF493       | -1.03 | 1.38E-01 | 3.77E-01 | 1071.82  | not significant |
| 1672 | RPS2         | -1.03 | 7.06E-02 | 2.46E-01 | 41376.24 | not significant |
| 1673 | REV3L        | -1.03 | 1.23E-01 | 3.51E-01 | 2364.28  | not significant |
| 1674 | ALG3         | -1.03 | 1.17E-01 | 3.39E-01 | 1840.10  | not significant |
| 1675 | ZCCHC3       | -1.03 | 9.65E-02 | 3.01E-01 | 2857.93  | not significant |
| 1676 | USP24        | -1.03 | 8.92E-02 | 2.86E-01 | 5694.20  | not significant |
| 1677 | FNBP1        | -1.03 | 4.51E-02 | 1.84E-01 | 8044.04  | not significant |
| 1678 | CTSH         | -1.03 | 1.25E-01 | 3.54E-01 | 1436.22  | not significant |
| 1679 | RNF41        | -1.03 | 1.17E-01 | 3.40E-01 | 1851.85  | not significant |
| 1680 | KNOP1        | -1.03 | 1.28E-01 | 3.60E-01 | 1210.75  | not significant |
| 1681 | CEP55        | -1.03 | 8.84E-02 | 2.85E-01 | 3806.45  | not significant |
| 1682 | POLR3F       | -1.03 | 1.40E-01 | 3.81E-01 | 759.17   | not significant |
| 1683 | DNM2         | -1.03 | 5.15E-02 | 2.01E-01 | 8053.26  | not significant |
| 1684 | CLSTN3       | -1.03 | 1.31E-01 | 3.64E-01 | 1430.71  | not significant |
| 1685 | ZWILCH       | -1.03 | 1.19E-01 | 3.44E-01 | 2039.16  | not significant |
| 1686 | CDCA3        | -1.03 | 1.10E-01 | 3.26E-01 | 302.46   | not significant |
| 1687 | CDC40        | -1.03 | 1.14E-01 | 3.35E-01 | 1688.18  | not significant |
| 1688 | SLAIN2       | -1.03 | 1.06E-01 | 3.19E-01 | 2436.32  | not significant |
| 1689 | KCTD11       | -1.03 | 8.26E-02 | 2.73E-01 | 186.62   | not significant |
| 1690 | RFK          | -1.03 | 1.19E-01 | 3.44E-01 | 1767.24  | not significant |
| 1691 | C17orf75     | -1.03 | 1.33E-01 | 3.68E-01 | 1189.85  | not significant |
| 1692 | INTS3        | -1.03 | 1.31E-01 | 3.65E-01 | 1279.55  | not significant |
| 1693 | POLR1C       | -1.03 | 1.43E-01 | 3.86E-01 | 1067.14  | not significant |
| 1694 | SUGP1        | -1.03 | 1.24E-01 | 3.52E-01 | 1073.38  | not significant |
| 1695 | HOOK3        | -1.03 | 1.30E-01 | 3.62E-01 | 2912.25  | not significant |
| 1696 | ADIPOR2      | -1.03 | 5.77E-02 | 2.16E-01 | 6439.38  | not significant |
| 1697 | ERGC2        | -1.03 | 1.30E-01 | 3.62E-01 | 1499.73  | not significant |
| 1698 | ARIH2        | -1.03 | 8.86E-02 | 2.85E-01 | 3536.89  | not significant |
| 1699 | HEATR2       | -1.03 | 9.86E-02 | 3.05E-01 | 2637.22  | not significant |
| 1700 | CAMKK2       | -1.03 | 8.96E-02 | 2.87E-01 | 4608.51  | not significant |
| 1701 | ZNF383       | -1.03 | 9.84E-02 | 3.05E-01 | 240.96   | not significant |
| 1702 | CCSER2       | -1.03 | 1.33E-01 | 3.68E-01 | 2191.92  | not significant |
| 1703 | SENP6        | -1.03 | 8.88E-02 | 2.85E-01 | 4409.32  | not significant |
| 1704 | NUP50        | -1.03 | 6.01E-02 | 2.21E-01 | 7950.82  | not significant |
| 1705 | TBRG1        | -1.03 | 1.21E-01 | 3.48E-01 | 2002.72  | not significant |
| 1706 | TMEM186      | -1.03 | 1.42E-01 | 3.84E-01 | 488.37   | not significant |
| 1707 | CFLAR        | -1.03 | 1.21E-01 | 3.48E-01 | 1133.32  | not significant |
| 1708 | STAMBP       | -1.03 | 1.13E-01 | 3.32E-01 | 2145.76  | not significant |
| 1709 | SASH3        | -1.03 | 4.14E-02 | 1.74E-01 | 24247.58 | not significant |
| 1710 | ZNF808       | -1.03 | 1.23E-01 | 3.52E-01 | 390.37   | not significant |
| 1711 | DLEU2        | -1.03 | 1.37E-01 | 3.75E-01 | 650.87   | not significant |
| 1712 | EIF4H        | -1.03 | 1.44E-01 | 3.88E-01 | 982.74   | not significant |
| 1713 | DARS2        | -1.03 | 5.81E-01 | NA       | 24.54    | not significant |
| 1714 | TET1         | -1.03 | 1.46E-01 | 3.91E-01 | 720.04   | not significant |
| 1715 | ATIC         | -1.03 | 5.93E-02 | 2.20E-01 | 6986.59  | not significant |
| 1716 | LOC100130744 | -1.03 | 7.39E-02 | 2.53E-01 | 166.48   | not significant |
| 1717 | UGDH         | -1.03 | 1.51E-01 | 3.98E-01 | 845.67   | not significant |
| 1718 | ACBD7        | -1.03 | 1.49E-01 | 3.96E-01 | 954.52   | not significant |
| 1719 | TBPL1        | -1.03 | 1.45E-01 | 3.90E-01 | 942.34   | not significant |
| 1720 | ARHGDI3      | -1.03 | 4.96E-02 | 1.96E-01 | 35642.96 | not significant |
| 1721 | RNF138       | -1.03 | 7.82E-02 | 2.63E-01 | 3986.57  | not significant |
| 1722 | RAB11FIP1    | -1.03 | 6.78E-02 | 2.40E-01 | 13626.32 | not significant |
| 1723 | PINX1        | -1.03 | 1.46E-01 | 3.90E-01 | 1148.97  | not significant |
| 1724 | TRMT6        | -1.03 | 1.26E-01 | 3.56E-01 | 2043.16  | not significant |
| 1725 | HIF1AN       | -1.03 | 9.35E-02 | 2.95E-01 | 3997.96  | not significant |
| 1726 | ZPR1         | -1.03 | 1.24E-01 | 3.52E-01 | 1722.00  | not significant |
| 1727 | EEA1         | -1.03 | 1.39E-01 | 3.80E-01 | 1782.55  | not significant |
| 1728 | ROCK2        | -1.03 | 1.37E-01 | 3.75E-01 | 1847.65  | not significant |
| 1729 | C1QBP        | -1.03 | 9.49E-02 | 2.97E-01 | 15640.66 | not significant |
| 1730 | CACTIN       | -1.03 | 1.26E-01 | 3.55E-01 | 1831.51  | not significant |
| 1731 | CKAP2L       | -1.03 | 1.30E-01 | 3.63E-01 | 1916.74  | not significant |
| 1732 | EIF2B1       | -1.03 | 8.32E-02 | 2.73E-01 | 4694.24  | not significant |
| 1733 | SREBF1       | -1.03 | 9.34E-02 | 2.95E-01 | 4284.17  | not significant |
| 1734 | CISD3        | -1.03 | 1.50E-01 | 3.97E-01 | 1858.94  | not significant |
| 1735 | DNAJC8       | -1.03 | 1.21E-01 | 3.47E-01 | 5382.96  | not significant |
| 1736 | ANXA2        | -1.03 | 1.26E-01 | 3.56E-01 | 314.30   | not significant |
| 1737 | MTO1         | -1.03 | 1.30E-01 | 3.63E-01 | 1836.59  | not significant |
| 1738 | DNAJA2       | -1.03 | 1.09E-01 | 3.25E-01 | 3553.76  | not significant |
| 1739 | RAPGEF1      | -1.03 | 1.24E-01 | 3.53E-01 | 2571.85  | not significant |
| 1740 | GRK5         | -1.03 | 1.15E-01 | 3.36E-01 | 2278.08  | not significant |
| 1741 | FAM199X      | -1.03 | 5.78E-02 | 2.16E-01 | 136.77   | not significant |
| 1742 | ARID3B       | -1.03 | 1.24E-01 | 3.52E-01 | 2325.09  | not significant |
| 1743 | NUTF2        | -1.03 | 1.10E-01 | 3.28E-01 | 5349.82  | not significant |
| 1744 | CCT8         | -1.03 | 5.76E-02 | 2.16E-01 | 13860.19 | not significant |
| 1745 | TMEM203      | -1.03 | 1.49E-01 | 3.96E-01 | 1343.10  | not significant |
| 1746 | PREB         | -1.03 | 1.24E-01 | 3.52E-01 | 2709.38  | not significant |
| 1747 | FUBP3        | -1.03 | 1.30E-01 | 3.63E-01 | 2027.51  | not significant |

|      |            |       |          |          |          |                 |
|------|------------|-------|----------|----------|----------|-----------------|
| 1748 | OSBPL8     | -1.03 | 8.80E-02 | 2.84E-01 | 7715.22  | not significant |
| 1749 | TMEM164    | -1.03 | 9.10E-02 | 2.89E-01 | 4757.78  | not significant |
| 1750 | USP7       | -1.03 | 4.63E-02 | 1.87E-01 | 10468.00 | not significant |
| 1751 | PTMS       | -1.03 | 1.07E-01 | 3.21E-01 | 233.17   | not significant |
| 1752 | KCNAB3     | -1.03 | 9.96E-02 | 3.08E-01 | 199.78   | not significant |
| 1753 | RPP38      | -1.03 | 1.43E-01 | 3.86E-01 | 464.42   | not significant |
| 1754 | ZFP64      | -1.03 | 1.56E-01 | 4.04E-01 | 740.85   | not significant |
| 1755 | FRS2       | -1.03 | 1.51E-01 | 3.99E-01 | 1115.70  | not significant |
| 1756 | YME1L1     | -1.03 | 5.51E-02 | 2.10E-01 | 9059.60  | not significant |
| 1757 | VTI1A      | -1.03 | 1.46E-01 | 3.90E-01 | 1234.74  | not significant |
| 1758 | RNMT       | -1.03 | 1.13E-01 | 3.33E-01 | 3169.16  | not significant |
| 1759 | CENPI      | -1.03 | 1.38E-01 | 3.78E-01 | 604.79   | not significant |
| 1760 | CCZ1B      | -1.03 | 1.56E-01 | 4.04E-01 | 718.33   | not significant |
| 1761 | ARV1       | -1.03 | 1.51E-01 | 3.99E-01 | 651.63   | not significant |
| 1762 | HARS       | -1.03 | 1.26E-01 | 3.56E-01 | 2401.24  | not significant |
| 1763 | TIPRL      | -1.03 | 9.42E-02 | 2.96E-01 | 4054.66  | not significant |
| 1764 | CCNYL1     | -1.03 | 1.55E-01 | 4.04E-01 | 646.84   | not significant |
| 1765 | HCCS       | -1.03 | 1.57E-01 | 4.05E-01 | 672.89   | not significant |
| 1766 | MRPL20     | -1.03 | 1.38E-01 | 3.77E-01 | 2854.86  | not significant |
| 1767 | SMG6       | -1.03 | 1.11E-01 | 3.29E-01 | 2835.00  | not significant |
| 1768 | BDP1       | -1.03 | 1.56E-01 | 4.04E-01 | 935.81   | not significant |
| 1769 | MRPL22     | -1.03 | 1.55E-01 | 4.03E-01 | 1237.38  | not significant |
| 1770 | SNRNP25    | -1.03 | 1.51E-01 | 3.98E-01 | 2041.10  | not significant |
| 1771 | TMEM71     | -1.03 | 9.70E-02 | 3.02E-01 | 183.92   | not significant |
| 1772 | MPC1       | -1.03 | 1.56E-01 | 4.04E-01 | 1565.83  | not significant |
| 1773 | AGO3       | -1.03 | 1.54E-01 | 4.03E-01 | 647.67   | not significant |
| 1774 | SUPT20H    | -1.03 | 1.26E-01 | 3.56E-01 | 2575.35  | not significant |
| 1775 | SMPD4      | -1.03 | 1.01E-01 | 3.09E-01 | 3920.54  | not significant |
| 1776 | KHSRP      | -1.03 | 5.73E-02 | 2.16E-01 | 15769.34 | not significant |
| 1777 | RPAP2      | -1.03 | 1.62E-01 | 4.12E-01 | 814.08   | not significant |
| 1778 | ZDHC18     | -1.03 | 1.35E-01 | 3.71E-01 | 2001.76  | not significant |
| 1779 | RAC1       | -1.03 | 1.13E-01 | 3.33E-01 | 5270.03  | not significant |
| 1780 | CLN8       | -1.03 | 1.40E-01 | 3.81E-01 | 465.80   | not significant |
| 1781 | PLEKHO2    | -1.03 | 1.60E-01 | 4.10E-01 | 779.89   | not significant |
| 1782 | SEC16A     | -1.03 | 1.10E-01 | 3.27E-01 | 5592.82  | not significant |
| 1783 | CGN        | -1.03 | 1.41E-01 | 3.82E-01 | 374.47   | not significant |
| 1784 | EPB41      | -1.03 | 1.02E-01 | 3.12E-01 | 7411.08  | not significant |
| 1785 | MAPRE1     | -1.03 | 5.93E-02 | 2.20E-01 | 12724.09 | not significant |
| 1786 | GMEB1      | -1.03 | 1.47E-01 | 3.93E-01 | 522.48   | not significant |
| 1787 | PHF23      | -1.03 | 1.72E-01 | 4.26E-01 | 1237.41  | not significant |
| 1788 | CDK2AP2    | -1.03 | 1.33E-01 | 3.67E-01 | 4671.08  | not significant |
| 1789 | SMYD5      | -1.03 | 1.42E-01 | 3.84E-01 | 1802.64  | not significant |
| 1790 | SLA        | -1.03 | 1.04E-01 | 3.16E-01 | 3312.97  | not significant |
| 1791 | SLTM       | -1.03 | 1.07E-01 | 3.21E-01 | 4354.53  | not significant |
| 1792 | PRKCB      | -1.03 | 9.15E-02 | 2.90E-01 | 7671.96  | not significant |
| 1793 | SUPT16H    | -1.03 | 5.85E-02 | 2.18E-01 | 13624.90 | not significant |
| 1794 | SCLT1      | -1.03 | 1.63E-01 | 4.13E-01 | 812.49   | not significant |
| 1795 | RFWD2      | -1.03 | 1.41E-01 | 3.83E-01 | 1567.37  | not significant |
| 1796 | TACK1      | -1.03 | 1.40E-01 | 3.81E-01 | 3667.74  | not significant |
| 1797 | NME6       | -1.03 | 1.64E-01 | 4.16E-01 | 702.58   | not significant |
| 1798 | ARPC4      | -1.03 | 1.42E-01 | 3.84E-01 | 3742.24  | not significant |
| 1799 | LCK        | -1.03 | 5.43E-02 | 2.08E-01 | 21650.40 | not significant |
| 1800 | PSMD7      | -1.03 | 1.04E-01 | 3.15E-01 | 5099.83  | not significant |
| 1801 | ACER2      | -1.03 | 1.04E-01 | 3.16E-01 | 163.36   | not significant |
| 1802 | MT2A       | -1.03 | 2.02E-01 | 4.67E-01 | 34834.43 | not significant |
| 1803 | BZRAP1-AS1 | -1.03 | 1.63E-01 | 4.14E-01 | 625.49   | not significant |
| 1804 | PWP2       | -1.03 | 1.61E-01 | 4.11E-01 | 1602.38  | not significant |
| 1805 | CEP164     | -1.03 | 1.65E-01 | 4.17E-01 | 905.73   | not significant |
| 1806 | EGLN1      | -1.03 | 1.59E-01 | 4.08E-01 | 1072.99  | not significant |
| 1807 | MTMR1      | -1.03 | 1.61E-01 | 4.11E-01 | 561.29   | not significant |
| 1808 | MRPS2      | -1.03 | 1.55E-01 | 4.04E-01 | 1439.65  | not significant |
| 1809 | METTL2B    | -1.03 | 1.64E-01 | 4.14E-01 | 1006.59  | not significant |
| 1810 | KLHL21     | -1.03 | 1.55E-01 | 4.03E-01 | 965.50   | not significant |
| 1811 | THAP4      | -1.03 | 1.47E-01 | 3.91E-01 | 1662.86  | not significant |
| 1812 | ZNF197     | -1.03 | 1.53E-01 | 4.01E-01 | 1308.02  | not significant |
| 1813 | AKNA       | -1.03 | 7.34E-02 | 2.52E-01 | 8882.48  | not significant |
| 1814 | ZNF416     | -1.03 | 1.41E-01 | 3.83E-01 | 358.65   | not significant |
| 1815 | TARBP2     | -1.03 | 1.62E-01 | 4.13E-01 | 1766.55  | not significant |
| 1816 | SUFU       | -1.03 | 1.57E-01 | 4.05E-01 | 1018.32  | not significant |
| 1817 | GGA2       | -1.03 | 1.67E-01 | 4.20E-01 | 692.49   | not significant |
| 1818 | HSPBP1     | -1.03 | 1.50E-01 | 3.97E-01 | 2101.06  | not significant |
| 1819 | FAM98B     | -1.03 | 1.38E-01 | 3.76E-01 | 2102.86  | not significant |
| 1820 | BICD1      | -1.03 | 2.08E-01 | 4.73E-01 | 565.93   | not significant |
| 1821 | CAMKK1     | -1.03 | 7.24E-02 | 2.51E-01 | 138.43   | not significant |
| 1822 | RAB29      | -1.03 | 1.73E-01 | 4.28E-01 | 960.38   | not significant |
| 1823 | MATR3      | -1.03 | 5.95E-02 | 2.21E-01 | 24871.43 | not significant |
| 1824 | CCT3       | -1.03 | 6.57E-02 | 2.35E-01 | 21332.67 | not significant |
| 1825 | EXOC8      | -1.03 | 1.68E-01 | 4.22E-01 | 1167.47  | not significant |
| 1826 | ADK        | -1.03 | 1.49E-01 | 3.95E-01 | 1650.52  | not significant |
| 1827 | SLAIN1     | -1.03 | 1.46E-01 | 3.90E-01 | 1947.45  | not significant |
| 1828 | RPL7       | -1.03 | 1.23E-01 | 3.52E-01 | 16638.34 | not significant |
| 1829 | WDR20      | -1.03 | 1.72E-01 | 4.26E-01 | 657.08   | not significant |
| 1830 | KIF1C      | -1.03 | 1.52E-01 | 3.99E-01 | 1814.05  | not significant |
| 1831 | ANKRD46    | -1.03 | 1.59E-01 | 4.07E-01 | 1457.80  | not significant |
| 1832 | MED4       | -1.03 | 1.25E-01 | 3.53E-01 | 3254.05  | not significant |
| 1833 | MOB3A      | -1.03 | 1.30E-01 | 3.63E-01 | 2758.35  | not significant |
| 1834 | AZIN1      | -1.03 | 4.56E-02 | 1.85E-01 | 18035.01 | not significant |
| 1835 | SBF2       | -1.03 | 1.68E-01 | 4.21E-01 | 631.47   | not significant |



|      |             |       |          |          |          |                 |
|------|-------------|-------|----------|----------|----------|-----------------|
| 1836 | SLC25A51    | -1.03 | 4.72E-01 | NA       | 71.42    | not significant |
| 1837 | RBBP5       | -1.03 | 1.42E-01 | 3.84E-01 | 2101.99  | not significant |
| 1838 | ATP8A2      | -1.03 | 1.51E-01 | 3.98E-01 | 437.08   | not significant |
| 1839 | DHDDS       | -1.03 | 1.61E-01 | 4.11E-01 | 1342.47  | not significant |
| 1840 | TOX4        | -1.03 | 1.23E-01 | 3.51E-01 | 2750.19  | not significant |
| 1841 | PITRM1      | -1.03 | 1.26E-01 | 3.55E-01 | 2761.36  | not significant |
| 1842 | BTBD1       | -1.03 | 1.18E-01 | 3.41E-01 | 2826.02  | not significant |
| 1843 | EIF3A       | -1.03 | 6.79E-02 | 2.40E-01 | 21163.01 | not significant |
| 1844 | CS          | -1.03 | 5.99E-02 | 2.21E-01 | 10431.78 | not significant |
| 1845 | LRTOMT      | -1.03 | 1.12E-01 | 3.31E-01 | 225.93   | not significant |
| 1846 | TYW5        | -1.03 | 1.60E-01 | 4.10E-01 | 457.39   | not significant |
| 1847 | ANKMY2      | -1.03 | 1.65E-01 | 4.16E-01 | 1457.26  | not significant |
| 1848 | RYBP        | -1.03 | 1.63E-01 | 4.13E-01 | 1365.45  | not significant |
| 1849 | ZNF106      | -1.03 | 1.63E-01 | 4.14E-01 | 2535.82  | not significant |
| 1850 | SMG8        | -1.03 | 1.50E-01 | 3.97E-01 | 1680.30  | not significant |
| 1851 | SEL1L       | -1.03 | 1.24E-01 | 3.53E-01 | 5506.16  | not significant |
| 1852 | SZRD1       | -1.03 | 9.07E-02 | 2.88E-01 | 6966.21  | not significant |
| 1853 | ZNF324      | -1.03 | 1.70E-01 | 4.24E-01 | 530.63   | not significant |
| 1854 | BCAT2       | -1.03 | 1.75E-01 | 4.30E-01 | 1009.58  | not significant |
| 1855 | SPAST       | -1.03 | 1.61E-01 | 4.12E-01 | 2036.89  | not significant |
| 1856 | FAM13B      | -1.03 | 1.25E-01 | 3.55E-01 | 3163.53  | not significant |
| 1857 | TET3        | -1.03 | 1.63E-01 | 4.14E-01 | 3341.87  | not significant |
| 1858 | UBR3        | -1.03 | 1.66E-01 | 4.19E-01 | 1731.03  | not significant |
| 1859 | NETO2       | -1.03 | 1.61E-01 | 4.11E-01 | 1654.82  | not significant |
| 1860 | COPS2       | -1.03 | 1.55E-01 | 4.03E-01 | 1977.02  | not significant |
| 1861 | EIF3D       | -1.03 | 1.04E-01 | 3.16E-01 | 9928.68  | not significant |
| 1862 | MCC         | -1.03 | 1.43E-01 | 3.86E-01 | 317.45   | not significant |
| 1863 | TSEN2       | -1.03 | 1.67E-01 | 4.20E-01 | 466.69   | not significant |
| 1864 | GPR17       | -1.03 | 1.01E-02 | NA       | 53.12    | not significant |
| 1865 | AQR         | -1.03 | 1.55E-01 | 4.04E-01 | 2338.92  | not significant |
| 1866 | SEC24C      | -1.03 | 1.21E-01 | 3.47E-01 | 6271.10  | not significant |
| 1867 | CCSAP       | -1.03 | 1.34E-01 | 3.69E-01 | 2865.27  | not significant |
| 1868 | NACAP1      | -1.03 | 1.70E-02 | NA       | 62.41    | not significant |
| 1869 | GYG2        | -1.03 | 1.52E-01 | 3.99E-01 | 369.61   | not significant |
| 1870 | ITPR2       | -1.03 | 1.66E-01 | 4.18E-01 | 2601.38  | not significant |
| 1871 | VPS25       | -1.03 | 1.56E-01 | 4.04E-01 | 1884.22  | not significant |
| 1872 | SOS1        | -1.03 | 1.72E-01 | 4.26E-01 | 2124.50  | not significant |
| 1873 | RSBN1       | -1.03 | 1.58E-01 | 4.06E-01 | 1547.29  | not significant |
| 1874 | SON         | -1.03 | 1.05E-01 | 3.18E-01 | 19350.90 | not significant |
| 1875 | HSPD1       | -1.03 | 7.29E-02 | 2.51E-01 | 32105.34 | not significant |
| 1876 | CCDC18      | -1.03 | 2.00E-01 | 4.64E-01 | 583.63   | not significant |
| 1877 | ZNF436      | -1.03 | 1.64E-01 | 4.15E-01 | 403.91   | not significant |
| 1878 | ITPR1       | -1.03 | 1.81E-01 | 4.38E-01 | 936.00   | not significant |
| 1879 | FAM76B      | -1.03 | 1.72E-01 | 4.26E-01 | 1192.85  | not significant |
| 1880 | PISD        | -1.03 | 1.48E-01 | 3.93E-01 | 2329.10  | not significant |
| 1881 | TBC1D14     | -1.03 | 1.15E-01 | 3.36E-01 | 3559.83  | not significant |
| 1882 | ARPC2       | -1.03 | 7.40E-02 | 2.53E-01 | 12756.44 | not significant |
| 1883 | ATP5EP2     | -1.03 | 5.72E-02 | NA       | 87.50    | not significant |
| 1884 | CFDP1       | -1.03 | 1.52E-01 | 4.00E-01 | 3026.79  | not significant |
| 1885 | WIPF2       | -1.03 | 1.75E-01 | 4.30E-01 | 1538.76  | not significant |
| 1886 | RBM10       | -1.03 | 1.55E-01 | 4.03E-01 | 1777.69  | not significant |
| 1887 | SMCR8       | -1.03 | 1.55E-01 | 4.04E-01 | 2714.99  | not significant |
| 1888 | TLL4        | -1.03 | 1.73E-01 | 4.27E-01 | 2139.93  | not significant |
| 1889 | TCERG1      | -1.03 | 1.14E-01 | 3.35E-01 | 5832.84  | not significant |
| 1890 | RASSF4      | -1.03 | 1.14E-01 | 3.34E-01 | 214.50   | not significant |
| 1891 | KANSL2      | -1.03 | 1.42E-01 | 3.84E-01 | 2378.57  | not significant |
| 1892 | RNF20       | -1.03 | 1.58E-01 | 4.06E-01 | 1723.12  | not significant |
| 1893 | ARF1        | -1.03 | 1.08E-01 | 3.24E-01 | 13515.96 | not significant |
| 1894 | HCFC2       | -1.03 | 1.82E-01 | 4.40E-01 | 744.84   | not significant |
| 1895 | ANKEF1      | -1.03 | 1.49E-01 | 3.95E-01 | 250.73   | not significant |
| 1896 | CLIP3       | -1.03 | 1.34E-01 | 3.70E-01 | 253.01   | not significant |
| 1897 | ZNF304      | -1.03 | 1.83E-01 | 4.41E-01 | 736.80   | not significant |
| 1898 | RC3H2       | -1.03 | 1.79E-01 | 4.36E-01 | 1548.81  | not significant |
| 1899 | 43533_16638 | -1.03 | 1.63E-01 | 4.13E-01 | 1783.04  | not significant |
| 1900 | MTMR10      | -1.03 | 1.69E-01 | 4.23E-01 | 1526.79  | not significant |
| 1901 | KLC2        | -1.03 | 1.44E-01 | 3.86E-01 | 2641.87  | not significant |
| 1902 | CBX1        | -1.03 | 8.44E-02 | 2.76E-01 | 8205.95  | not significant |
| 1903 | SNTB2       | -1.03 | 1.80E-01 | 4.37E-01 | 1063.20  | not significant |
| 1904 | MLKL        | -1.03 | 1.79E-01 | 4.36E-01 | 986.95   | not significant |
| 1905 | GTPBP10     | -1.03 | 1.60E-01 | 4.09E-01 | 1209.99  | not significant |
| 1906 | PPP2CB      | -1.03 | 1.38E-01 | 3.76E-01 | 2890.61  | not significant |
| 1907 | ZCCHC17     | -1.03 | 1.76E-01 | 4.31E-01 | 1318.61  | not significant |
| 1908 | AAR2        | -1.03 | 1.33E-01 | 3.67E-01 | 2859.78  | not significant |
| 1909 | CACYBP      | -1.03 | 1.21E-01 | 3.48E-01 | 5671.28  | not significant |
| 1910 | ZNF644      | -1.03 | 1.49E-01 | 3.96E-01 | 2647.68  | not significant |
| 1911 | TLN1        | -1.03 | 1.14E-01 | 3.35E-01 | 16525.05 | not significant |
| 1912 | HMGA1       | -1.03 | 8.31E-02 | 2.73E-01 | 10156.56 | not significant |
| 1913 | HIST1H2BH   | -1.03 | 6.88E-02 | 2.42E-01 | 128.85   | not significant |
| 1914 | DDIT3       | -1.03 | 1.61E-01 | 4.11E-01 | 428.89   | not significant |
| 1915 | CUL5        | -1.03 | 1.64E-01 | 4.16E-01 | 1713.46  | not significant |
| 1916 | MPP6        | -1.03 | 1.68E-01 | 4.21E-01 | 463.97   | not significant |
| 1917 | ALYREF      | -1.03 | 1.41E-01 | 3.83E-01 | 10475.63 | not significant |
| 1918 | SLC5A6      | -1.03 | 1.35E-01 | 3.72E-01 | 3841.61  | not significant |
| 1919 | ZNF137P     | -1.03 | 1.42E-01 | 3.84E-01 | 279.92   | not significant |
| 1920 | ZNF189      | -1.03 | 1.71E-01 | 4.25E-01 | 520.87   | not significant |
| 1921 | GAS7        | -1.03 | 1.39E-01 | 3.79E-01 | 3347.43  | not significant |
| 1922 | S100A11     | -1.03 | 1.93E-01 | 4.55E-01 | 898.97   | not significant |
| 1923 | LOC339862   | -1.03 | 1.91E-01 | 4.51E-01 | 886.79   | not significant |

|      |            |       |          |          |          |                 |
|------|------------|-------|----------|----------|----------|-----------------|
| 1924 | SRM        | -1.03 | 1.57E-01 | 4.05E-01 | 7122.26  | not significant |
| 1925 | WDR5       | -1.03 | 1.34E-01 | 3.70E-01 | 3196.65  | not significant |
| 1926 | TFCP2      | -1.03 | 1.16E-01 | 3.38E-01 | 4363.29  | not significant |
| 1927 | MKI67      | -1.03 | 1.09E-01 | 3.25E-01 | 21745.85 | not significant |
| 1928 | ZNF778     | -1.03 | 1.19E-01 | 3.45E-01 | 210.37   | not significant |
| 1929 | GEMIN4     | -1.03 | 1.49E-01 | 3.95E-01 | 2675.97  | not significant |
| 1930 | NDUFS1     | -1.03 | 1.16E-01 | 3.37E-01 | 3562.49  | not significant |
| 1931 | ELAC2      | -1.03 | 1.10E-01 | 3.28E-01 | 4642.00  | not significant |
| 1932 | UTP6       | -1.03 | 1.72E-01 | 4.26E-01 | 1967.47  | not significant |
| 1933 | PYGB       | -1.03 | 1.61E-01 | 4.11E-01 | 2026.37  | not significant |
| 1934 | MYO7B      | -1.03 | 6.43E-02 | 2.31E-01 | 35337.26 | not significant |
| 1935 | TTC27      | -1.03 | 1.82E-01 | 4.39E-01 | 1443.80  | not significant |
| 1936 | HMCES      | -1.03 | 1.58E-01 | 4.07E-01 | 2772.98  | not significant |
| 1937 | KXD1       | -1.03 | 1.52E-01 | 3.99E-01 | 2756.02  | not significant |
| 1938 | FUBP1      | -1.03 | 1.05E-01 | 3.18E-01 | 7566.61  | not significant |
| 1939 | TULP4      | -1.03 | 1.91E-01 | 4.51E-01 | 913.48   | not significant |
| 1940 | C16orf70   | -1.03 | 1.94E-01 | 4.56E-01 | 1107.21  | not significant |
| 1941 | MCPH1      | -1.03 | 1.76E-01 | 4.32E-01 | 1603.49  | not significant |
| 1942 | MRPL13     | -1.03 | 1.67E-01 | 4.20E-01 | 2474.62  | not significant |
| 1943 | YTHDF3     | -1.03 | 1.51E-01 | 3.98E-01 | 2635.93  | not significant |
| 1944 | RGS3       | -1.03 | 1.88E-01 | 4.47E-01 | 660.05   | not significant |
| 1945 | TRMT5      | -1.03 | 1.95E-01 | 4.57E-01 | 763.93   | not significant |
| 1946 | ZNF254     | -1.03 | 1.80E-01 | 4.37E-01 | 1243.25  | not significant |
| 1947 | KIDINS220  | -1.03 | 1.45E-01 | 3.88E-01 | 4160.66  | not significant |
| 1948 | RNF40      | -1.03 | 1.05E-01 | 3.18E-01 | 5755.58  | not significant |
| 1949 | DHX30      | -1.03 | 1.15E-01 | 3.36E-01 | 5616.94  | not significant |
| 1950 | SOX12      | -1.03 | 1.88E-01 | 4.48E-01 | 1029.74  | not significant |
| 1951 | RINT1      | -1.03 | 1.83E-01 | 4.40E-01 | 1381.67  | not significant |
| 1952 | CIPC       | -1.03 | 1.84E-01 | 4.42E-01 | 1175.74  | not significant |
| 1953 | EIF1AX     | -1.03 | 1.48E-01 | 3.94E-01 | 2916.44  | not significant |
| 1954 | ZDHHC5     | -1.03 | 1.38E-01 | 3.76E-01 | 6142.55  | not significant |
| 1955 | MTRF1L     | -1.03 | 1.53E-01 | 4.01E-01 | 292.11   | not significant |
| 1956 | NAF1       | -1.03 | 1.88E-01 | 4.47E-01 | 1117.97  | not significant |
| 1957 | RNH1       | -1.03 | 1.45E-01 | 3.88E-01 | 3037.59  | not significant |
| 1958 | FBXO18     | -1.03 | 1.79E-01 | 4.36E-01 | 2001.25  | not significant |
| 1959 | ST6GALNAC6 | -1.03 | 1.81E-01 | 4.38E-01 | 529.48   | not significant |
| 1960 | C5orf22    | -1.03 | 1.80E-01 | 4.37E-01 | 1466.28  | not significant |
| 1961 | ATP6V1D    | -1.03 | 1.68E-01 | 4.21E-01 | 1691.02  | not significant |
| 1962 | SH3PXD2A   | -1.03 | 1.71E-01 | 4.25E-01 | 2150.12  | not significant |
| 1963 | CFAP97     | -1.03 | 1.39E-01 | 3.79E-01 | 3048.03  | not significant |
| 1964 | NT5DC3     | -1.03 | 1.74E-01 | 4.30E-01 | 390.98   | not significant |
| 1965 | TFB2M      | -1.03 | 2.04E-01 | 4.70E-01 | 974.15   | not significant |
| 1966 | MSN        | -1.03 | 9.18E-02 | 2.91E-01 | 41851.88 | not significant |
| 1967 | INPP1      | -1.03 | 7.19E-02 | 2.49E-01 | 117.29   | not significant |
| 1968 | MAP1A      | -1.03 | 1.84E-01 | 4.42E-01 | 6156.22  | not significant |
| 1969 | EMC3-AS1   | -1.03 | 2.00E-01 | 4.64E-01 | 683.18   | not significant |
| 1970 | SLC35D1    | -1.03 | 1.76E-01 | 4.32E-01 | 2075.91  | not significant |
| 1971 | USP38      | -1.03 | 1.75E-01 | 4.31E-01 | 2403.09  | not significant |
| 1972 | APPL1      | -1.03 | 1.35E-01 | 3.72E-01 | 4179.68  | not significant |
| 1973 | BPGM       | -1.03 | 1.94E-01 | 4.56E-01 | 721.21   | not significant |
| 1974 | CDK5RAP1   | -1.03 | 1.84E-01 | 4.41E-01 | 1310.59  | not significant |
| 1975 | WEE1       | -1.03 | 1.21E-01 | 3.48E-01 | 4067.80  | not significant |
| 1976 | TRAPPC8    | -1.03 | 1.63E-01 | 4.14E-01 | 2363.17  | not significant |
| 1977 | BUB1B      | -1.03 | 1.56E-01 | 4.04E-01 | 2798.01  | not significant |
| 1978 | TMTC3      | -1.03 | 1.94E-01 | 4.55E-01 | 582.03   | not significant |
| 1979 | NTMT1      | -1.03 | 1.98E-01 | 4.62E-01 | 783.47   | not significant |
| 1980 | NKD2       | -1.03 | 1.89E-01 | 4.48E-01 | 615.30   | not significant |
| 1981 | TAP1       | -1.03 | 2.20E-01 | 4.86E-01 | 940.22   | not significant |
| 1982 | MYO5A      | -1.03 | 1.87E-01 | 4.46E-01 | 1423.88  | not significant |
| 1983 | PIM3       | -1.03 | 1.62E-01 | 4.13E-01 | 2710.58  | not significant |
| 1984 | NACC1      | -1.03 | 1.22E-01 | 3.50E-01 | 5243.57  | not significant |
| 1985 | RANBP2     | -1.03 | 1.52E-01 | 4.00E-01 | 7315.18  | not significant |
| 1986 | RPTOR      | -1.03 | 1.21E-01 | 3.48E-01 | 8082.23  | not significant |
| 1987 | INPP5D     | -1.03 | 1.00E-01 | 3.09E-01 | 8178.66  | not significant |
| 1988 | PBDC1      | -1.03 | 1.07E-01 | 3.21E-01 | 172.77   | not significant |
| 1989 | USP18      | -1.03 | 2.09E-01 | 4.74E-01 | 579.91   | not significant |
| 1990 | IKZF5      | -1.03 | 1.94E-01 | 4.56E-01 | 975.17   | not significant |
| 1991 | EBAG9      | -1.03 | 1.70E-01 | 4.24E-01 | 1531.15  | not significant |
| 1992 | PIK3R4     | -1.03 | 1.91E-01 | 4.51E-01 | 2032.53  | not significant |
| 1993 | NPRL3      | -1.03 | 1.58E-01 | 4.07E-01 | 2495.31  | not significant |
| 1994 | BRPF3      | -1.03 | 1.82E-01 | 4.40E-01 | 1741.84  | not significant |
| 1995 | PRCC       | -1.03 | 1.47E-01 | 3.92E-01 | 3218.00  | not significant |
| 1996 | TRIM37     | -1.03 | 1.58E-01 | 4.06E-01 | 3028.81  | not significant |
| 1997 | BZW2       | -1.03 | 1.29E-01 | 3.62E-01 | 6842.67  | not significant |
| 1998 | OTUB2      | -1.03 | 5.44E-02 | NA       | 100.29   | not significant |
| 1999 | ZNF440     | -1.03 | 1.53E-01 | 4.01E-01 | 289.22   | not significant |
| 2000 | ZNF839     | -1.03 | 1.85E-01 | 4.43E-01 | 397.86   | not significant |
| 2001 | SLC35F2    | -1.03 | 1.92E-01 | 4.53E-01 | 1151.30  | not significant |
| 2002 | CDKAL1     | -1.03 | 1.89E-01 | 4.48E-01 | 1249.01  | not significant |
| 2003 | ZCRB1      | -1.03 | 1.69E-01 | 4.23E-01 | 2305.71  | not significant |
| 2004 | FAF1       | -1.03 | 1.56E-01 | 4.04E-01 | 3664.62  | not significant |
| 2005 | GTF3A      | -1.03 | 1.24E-01 | 3.52E-01 | 12101.80 | not significant |
| 2006 | RAD50      | -1.03 | 1.69E-01 | 4.23E-01 | 2752.55  | not significant |
| 2007 | ALDH18A1   | -1.03 | 1.14E-01 | 3.34E-01 | 6247.77  | not significant |
| 2008 | FAM168A    | -1.03 | 1.56E-01 | 4.04E-01 | 3109.32  | not significant |
| 2009 | USP54      | -1.03 | 1.85E-01 | 4.44E-01 | 495.68   | not significant |
| 2010 | ZNHIT1     | -1.03 | 1.99E-01 | 4.63E-01 | 1628.29  | not significant |
| 2011 | NGDN       | -1.03 | 1.83E-01 | 4.40E-01 | 1749.82  | not significant |

|      |              |       |          |          |          |                 |
|------|--------------|-------|----------|----------|----------|-----------------|
| 2012 | DNAJC7       | -1.03 | 1.85E-01 | 4.44E-01 | 1817.24  | not significant |
| 2013 | MAP3K11      | -1.03 | 1.44E-01 | 3.88E-01 | 2836.01  | not significant |
| 2014 | PSMG3-AS1    | -1.03 | 1.71E-01 | 4.25E-01 | 304.99   | not significant |
| 2015 | ZFAND4       | -1.03 | 2.10E-01 | 4.74E-01 | 852.97   | not significant |
| 2016 | C1orf174     | -1.03 | 1.91E-01 | 4.51E-01 | 1516.82  | not significant |
| 2017 | USMG5        | -1.03 | 1.77E-01 | 4.32E-01 | 3414.90  | not significant |
| 2018 | MAF          | -1.03 | 2.90E-02 | NA       | 71.56    | not significant |
| 2019 | DRG2         | -1.03 | 1.71E-01 | 4.25E-01 | 2033.60  | not significant |
| 2020 | FTO          | -1.03 | 1.59E-01 | 4.08E-01 | 2379.53  | not significant |
| 2021 | PDCD2L       | -1.03 | 1.81E-01 | 4.38E-01 | 416.68   | not significant |
| 2022 | VPS54        | -1.03 | 2.00E-01 | 4.64E-01 | 995.28   | not significant |
| 2023 | TSFM         | -1.03 | 2.01E-01 | 4.65E-01 | 1569.58  | not significant |
| 2024 | TUBG1        | -1.03 | 1.72E-01 | 4.26E-01 | 2020.55  | not significant |
| 2025 | GLRX2        | -1.03 | 1.76E-01 | 4.31E-01 | 368.39   | not significant |
| 2026 | TUBGCP4      | -1.03 | 2.00E-01 | 4.64E-01 | 1621.78  | not significant |
| 2027 | CHP1         | -1.03 | 1.72E-01 | 4.26E-01 | 2035.99  | not significant |
| 2028 | PEBP1        | -1.03 | 1.25E-01 | 3.55E-01 | 10288.82 | not significant |
| 2029 | USP39        | -1.03 | 1.23E-01 | 3.52E-01 | 5036.06  | not significant |
| 2030 | LOC100128494 | -1.03 | 4.07E-02 | NA       | 88.13    | not significant |
| 2031 | MROH6        | -1.03 | 1.94E-01 | 4.56E-01 | 504.53   | not significant |
| 2032 | ZNF845       | -1.03 | 2.03E-01 | 4.68E-01 | 583.16   | not significant |
| 2033 | GNL1         | -1.03 | 2.08E-01 | 4.73E-01 | 1015.18  | not significant |
| 2034 | ERC1         | -1.03 | 2.09E-01 | 4.73E-01 | 820.73   | not significant |
| 2035 | EIF4E2       | -1.03 | 1.89E-01 | 4.49E-01 | 2394.41  | not significant |
| 2036 | COX6B1       | -1.03 | 1.67E-01 | 4.20E-01 | 4238.67  | not significant |
| 2037 | CCDC97       | -1.03 | 1.71E-01 | 4.25E-01 | 2290.99  | not significant |
| 2038 | GLUD1        | -1.03 | 1.16E-01 | 3.38E-01 | 5326.57  | not significant |
| 2039 | CSNK1A1      | -1.03 | 9.37E-02 | 2.95E-01 | 7480.30  | not significant |
| 2040 | SLC29A1      | -1.03 | 1.16E-01 | 3.37E-01 | 7391.95  | not significant |
| 2041 | ZNF263       | -1.03 | 1.86E-01 | 4.44E-01 | 1695.30  | not significant |
| 2042 | FAM149B1     | -1.03 | 1.87E-01 | 4.46E-01 | 418.67   | not significant |
| 2043 | ZNF423       | -1.03 | 2.10E-01 | 4.74E-01 | 1148.12  | not significant |
| 2044 | SHCBP1       | -1.03 | 1.67E-01 | 4.19E-01 | 2433.73  | not significant |
| 2045 | PSME4        | -1.03 | 1.78E-01 | 4.34E-01 | 3899.12  | not significant |
| 2046 | FOXJ3        | -1.03 | 1.73E-01 | 4.27E-01 | 3595.67  | not significant |
| 2047 | SH2B3        | -1.03 | 1.63E-01 | 4.13E-01 | 3119.26  | not significant |
| 2048 | PAPSS2       | -1.03 | 5.94E-02 | NA       | 97.97    | not significant |
| 2049 | ZSCAN21      | -1.03 | 1.28E-01 | 3.60E-01 | 228.74   | not significant |
| 2050 | RWDD2B       | -1.03 | 1.98E-01 | 4.62E-01 | 478.87   | not significant |
| 2051 | RPL8         | -1.03 | 1.75E-01 | 4.31E-01 | 40748.78 | not significant |
| 2052 | TMEM165      | -1.03 | 1.79E-01 | 4.36E-01 | 2610.43  | not significant |
| 2053 | ZSW1M1       | -1.03 | 1.97E-01 | 4.60E-01 | 485.22   | not significant |
| 2054 | ZNF136       | -1.03 | 2.08E-01 | 4.73E-01 | 793.10   | not significant |
| 2055 | COQ9         | -1.03 | 2.09E-01 | 4.73E-01 | 788.42   | not significant |
| 2056 | GNG5         | -1.03 | 1.68E-01 | 4.21E-01 | 4530.93  | not significant |
| 2057 | GDE1         | -1.03 | 1.69E-01 | 4.23E-01 | 2318.70  | not significant |
| 2058 | FOXRED2      | -1.03 | 1.59E-01 | 4.07E-01 | 3810.61  | not significant |
| 2059 | DEF8         | -1.03 | 7.37E-02 | 2.53E-01 | 105.48   | not significant |
| 2060 | HEATR6       | -1.03 | 2.15E-01 | 4.81E-01 | 770.61   | not significant |
| 2061 | APOBEC3G     | -1.03 | 1.99E-01 | 4.63E-01 | 1363.82  | not significant |
| 2062 | MRPS11       | -1.03 | 2.36E-01 | 5.03E-01 | 1053.99  | not significant |
| 2063 | SDAD1        | -1.03 | 1.52E-01 | 4.00E-01 | 3125.30  | not significant |
| 2064 | SERAC1       | -1.03 | 1.91E-01 | 4.52E-01 | 457.71   | not significant |
| 2065 | NDUFAF4      | -1.03 | 2.02E-01 | 4.67E-01 | 1358.04  | not significant |
| 2066 | ING1         | -1.03 | 2.07E-01 | 4.72E-01 | 1044.54  | not significant |
| 2067 | UCK2         | -1.03 | 1.24E-01 | 3.52E-01 | 5819.48  | not significant |
| 2068 | OGDH         | -1.03 | 1.33E-01 | 3.68E-01 | 5485.81  | not significant |
| 2069 | SRXN1        | -1.03 | 1.54E-01 | 4.02E-01 | 266.19   | not significant |
| 2070 | TRMT61B      | -1.03 | 1.80E-01 | 4.37E-01 | 309.57   | not significant |
| 2071 | PWWP2A       | -1.03 | 2.10E-01 | 4.74E-01 | 963.27   | not significant |
| 2072 | MED14        | -1.03 | 1.63E-01 | 4.14E-01 | 2784.06  | not significant |
| 2073 | MAVS         | -1.03 | 1.72E-01 | 4.26E-01 | 6174.37  | not significant |
| 2074 | VDAC3        | -1.03 | 1.42E-01 | 3.84E-01 | 6581.58  | not significant |
| 2075 | GIT1         | -1.03 | 1.33E-01 | 3.68E-01 | 4388.49  | not significant |
| 2076 | GLRX5        | -1.03 | 1.94E-01 | 4.56E-01 | 2505.25  | not significant |
| 2077 | ANKRD27      | -1.03 | 2.02E-01 | 4.66E-01 | 1509.27  | not significant |
| 2078 | UNC13D       | -1.03 | 9.24E-02 | 2.92E-01 | 10984.05 | not significant |
| 2079 | ADARB1       | -1.03 | 2.13E-01 | 4.78E-01 | 1287.96  | not significant |
| 2080 | GCC1         | -1.03 | 1.89E-01 | 4.49E-01 | 1176.78  | not significant |
| 2081 | SKP1         | -1.03 | 1.40E-01 | 3.81E-01 | 8735.83  | not significant |
| 2082 | NUP153       | -1.03 | 1.63E-01 | 4.14E-01 | 8500.82  | not significant |
| 2083 | LTA          | -1.03 | 1.02E-01 | 3.12E-01 | 147.30   | not significant |
| 2084 | PPAP2B       | -1.03 | 7.71E-02 | 2.60E-01 | 119.61   | not significant |
| 2085 | EMG1         | -1.03 | 2.20E-01 | 4.87E-01 | 704.85   | not significant |
| 2086 | DNAL1        | -1.03 | 2.08E-01 | 4.73E-01 | 560.40   | not significant |
| 2087 | TIPIN        | -1.03 | 2.11E-01 | 4.75E-01 | 873.87   | not significant |
| 2088 | SNHG17       | -1.03 | 2.16E-01 | 4.82E-01 | 941.56   | not significant |
| 2089 | PTPLB        | -1.03 | 2.19E-01 | 4.86E-01 | 768.38   | not significant |
| 2090 | UBR1         | -1.03 | 2.07E-01 | 4.72E-01 | 1685.17  | not significant |
| 2091 | LDOC1L       | -1.03 | 1.23E-01 | 3.51E-01 | 5627.26  | not significant |
| 2092 | SPATA33      | -1.03 | 1.86E-01 | 4.45E-01 | 365.00   | not significant |
| 2093 | KCTD3        | -1.03 | 2.40E-01 | 5.08E-01 | 875.28   | not significant |
| 2094 | EIF2B2       | -1.03 | 2.02E-01 | 4.67E-01 | 1885.87  | not significant |
| 2095 | UBB          | -1.03 | 2.36E-01 | 5.03E-01 | 20909.88 | not significant |
| 2096 | SNX8         | -1.03 | 2.30E-01 | 4.97E-01 | 1063.54  | not significant |
| 2097 | RIC1         | -1.03 | 2.05E-01 | 4.70E-01 | 1502.12  | not significant |
| 2098 | WSB2         | -1.03 | 1.96E-01 | 4.59E-01 | 2057.80  | not significant |
| 2099 | RPUSD1       | -1.03 | 2.06E-01 | 4.71E-01 | 1876.59  | not significant |

|      |            |       |          |          |          |                 |
|------|------------|-------|----------|----------|----------|-----------------|
| 2100 | CNTRL      | -1.03 | 1.98E-01 | 4.62E-01 | 2390.89  | not significant |
| 2101 | C12orf45   | -1.03 | 1.96E-01 | 4.58E-01 | 396.28   | not significant |
| 2102 | EXTL2      | -1.03 | 2.20E-01 | 4.86E-01 | 910.72   | not significant |
| 2103 | MRPL28     | -1.03 | 1.89E-01 | 4.48E-01 | 2810.77  | not significant |
| 2104 | ZBTB39     | -1.03 | 2.07E-01 | 4.72E-01 | 1448.06  | not significant |
| 2105 | ZNF260     | -1.03 | 1.98E-01 | 4.62E-01 | 2045.54  | not significant |
| 2106 | NRD1       | -1.03 | 1.36E-01 | 3.73E-01 | 6062.25  | not significant |
| 2107 | ZNF547     | -1.03 | 9.31E-02 | 2.94E-01 | 136.98   | not significant |
| 2108 | CRACR2A    | -1.03 | 2.10E-01 | 4.74E-01 | 762.62   | not significant |
| 2109 | PARN       | -1.03 | 2.00E-01 | 4.64E-01 | 2045.19  | not significant |
| 2110 | ZZZ3       | -1.03 | 1.96E-01 | 4.59E-01 | 2324.55  | not significant |
| 2111 | USP34      | -1.03 | 1.75E-01 | 4.30E-01 | 5939.30  | not significant |
| 2112 | LINC00909  | -1.03 | 2.20E-01 | 4.87E-01 | 675.13   | not significant |
| 2113 | SIDT1      | -1.03 | 2.17E-01 | 4.84E-01 | 806.99   | not significant |
| 2114 | FASTKD5    | -1.03 | 2.42E-01 | 5.10E-01 | 1100.48  | not significant |
| 2115 | MYBL2      | -1.03 | 1.11E-01 | 3.29E-01 | 11818.89 | not significant |
| 2116 | CSNK1D     | -1.03 | 1.15E-01 | 3.36E-01 | 6898.22  | not significant |
| 2117 | DDX47      | -1.03 | 1.86E-01 | 4.45E-01 | 2724.90  | not significant |
| 2118 | ZNF776     | -1.03 | 2.28E-01 | 4.95E-01 | 1241.08  | not significant |
| 2119 | EEFSEC     | -1.03 | 2.34E-01 | 5.01E-01 | 1114.13  | not significant |
| 2120 | ZNF41      | -1.03 | 2.16E-01 | 4.82E-01 | 590.70   | not significant |
| 2121 | TXLNG      | -1.03 | 2.04E-01 | 4.69E-01 | 2120.67  | not significant |
| 2122 | STK39      | -1.03 | 1.70E-01 | 4.24E-01 | 3134.70  | not significant |
| 2123 | TDG        | -1.03 | 1.45E-01 | 3.89E-01 | 4064.03  | not significant |
| 2124 | TFDP2      | -1.03 | 1.40E-01 | 3.81E-01 | 5714.32  | not significant |
| 2125 | ANGPT1     | -1.03 | 2.11E-01 | 4.75E-01 | 522.52   | not significant |
| 2126 | INPP5F     | -1.03 | 2.22E-01 | 4.89E-01 | 661.70   | not significant |
| 2127 | PITHD1     | -1.03 | 2.07E-01 | 4.72E-01 | 2249.99  | not significant |
| 2128 | LARS2      | -1.03 | 1.73E-01 | 4.27E-01 | 2893.12  | not significant |
| 2129 | BTF3       | -1.03 | 1.54E-01 | 4.02E-01 | 16681.97 | not significant |
| 2130 | FDX1L      | -1.03 | 2.11E-01 | 4.75E-01 | 634.03   | not significant |
| 2131 | SRA1       | -1.03 | 2.19E-01 | 4.86E-01 | 1012.99  | not significant |
| 2132 | PFDN1      | -1.03 | 2.01E-01 | 4.65E-01 | 2059.01  | not significant |
| 2133 | B3GALNT2   | -1.03 | 2.08E-01 | 4.73E-01 | 1887.01  | not significant |
| 2134 | SCAF11     | -1.03 | 1.39E-01 | 3.79E-01 | 8802.38  | not significant |
| 2135 | MIPPEP     | -1.03 | 2.14E-01 | 4.80E-01 | 544.71   | not significant |
| 2136 | PRKAR2A    | -1.03 | 2.25E-01 | 4.92E-01 | 771.34   | not significant |
| 2137 | TARS2      | -1.03 | 2.44E-01 | 5.12E-01 | 990.12   | not significant |
| 2138 | MRPL42     | -1.03 | 2.01E-01 | 4.66E-01 | 2777.77  | not significant |
| 2139 | ATXN3      | -1.03 | 2.14E-01 | 4.79E-01 | 1236.67  | not significant |
| 2140 | SPAG9      | -1.03 | 2.15E-01 | 4.81E-01 | 1957.47  | not significant |
| 2141 | DBP        | -1.03 | 2.80E-01 | 5.51E-01 | 547.03   | not significant |
| 2142 | ERIC1H1    | -1.03 | 2.26E-01 | 4.94E-01 | 1238.68  | not significant |
| 2143 | VKORC1L1   | -1.03 | 1.78E-01 | 4.35E-01 | 3529.57  | not significant |
| 2144 | PLEKHA8    | -1.03 | 2.11E-01 | 4.75E-01 | 1654.20  | not significant |
| 2145 | COPS4      | -1.03 | 2.12E-01 | 4.77E-01 | 1822.53  | not significant |
| 2146 | STRN3      | -1.03 | 2.60E-01 | 5.30E-01 | 1049.14  | not significant |
| 2147 | DDX19A     | -1.03 | 1.66E-01 | 4.18E-01 | 3187.68  | not significant |
| 2148 | HMGN5      | -1.03 | 2.13E-01 | 4.79E-01 | 792.56   | not significant |
| 2149 | IFT57      | -1.03 | 2.44E-01 | 5.12E-01 | 572.24   | not significant |
| 2150 | THOC6      | -1.03 | 2.16E-01 | 4.82E-01 | 1728.16  | not significant |
| 2151 | TBL3       | -1.03 | 2.01E-01 | 4.65E-01 | 2175.55  | not significant |
| 2152 | SAFB       | -1.03 | 1.34E-01 | 3.70E-01 | 6288.44  | not significant |
| 2153 | FTH1       | -1.03 | 2.91E-01 | 5.62E-01 | 28286.13 | not significant |
| 2154 | TMEM5      | -1.03 | 2.31E-01 | 4.99E-01 | 811.94   | not significant |
| 2155 | AP3M1      | -1.03 | 1.46E-01 | 3.90E-01 | 5123.12  | not significant |
| 2156 | SCPEP1     | -1.03 | 2.19E-01 | 4.86E-01 | 517.07   | not significant |
| 2157 | NPRL2      | -1.03 | 2.27E-01 | 4.95E-01 | 866.17   | not significant |
| 2158 | MED9       | -1.03 | 2.31E-01 | 4.99E-01 | 1041.89  | not significant |
| 2159 | PRKCA      | -1.03 | 1.90E-01 | 4.50E-01 | 6621.00  | not significant |
| 2160 | PAPD4      | -1.03 | 1.92E-01 | 4.52E-01 | 2473.14  | not significant |
| 2161 | DDX41      | -1.03 | 1.57E-01 | 4.05E-01 | 4281.29  | not significant |
| 2162 | SLC7A6OS   | -1.03 | 2.20E-01 | 4.87E-01 | 535.05   | not significant |
| 2163 | ZNF124     | -1.03 | 2.32E-01 | 4.99E-01 | 660.28   | not significant |
| 2164 | MAGOHB     | -1.03 | 2.30E-01 | 4.98E-01 | 1792.34  | not significant |
| 2165 | AKAP10     | -1.03 | 2.29E-01 | 4.96E-01 | 1068.38  | not significant |
| 2166 | AFF4       | -1.03 | 2.13E-01 | 4.78E-01 | 3650.26  | not significant |
| 2167 | GCLM       | -1.03 | 2.02E-01 | 4.67E-01 | 1660.01  | not significant |
| 2168 | TMEM41A    | -1.03 | 2.29E-01 | 4.97E-01 | 829.74   | not significant |
| 2169 | MPP5       | -1.03 | 2.31E-01 | 4.99E-01 | 789.46   | not significant |
| 2170 | ANKRD44    | -1.03 | 2.66E-01 | 5.37E-01 | 912.87   | not significant |
| 2171 | SH3BP5L    | -1.03 | 2.21E-01 | 4.87E-01 | 1826.34  | not significant |
| 2172 | ELMO2      | -1.03 | 2.07E-01 | 4.71E-01 | 2066.66  | not significant |
| 2173 | RAB1A      | -1.03 | 1.99E-01 | 4.63E-01 | 2622.05  | not significant |
| 2174 | AASDHPTT   | -1.03 | 1.81E-01 | 4.39E-01 | 3172.52  | not significant |
| 2175 | 43715_9262 | -1.03 | 1.10E-01 | 3.27E-01 | 10214.93 | not significant |
| 2176 | LINC00426  | -1.03 | 1.42E-01 | 3.84E-01 | 183.43   | not significant |
| 2177 | TRIM16     | -1.03 | 1.76E-01 | 4.31E-01 | 264.45   | not significant |
| 2178 | TMEM241    | -1.03 | 2.06E-01 | 4.71E-01 | 396.84   | not significant |
| 2179 | GCFC2      | -1.03 | 2.18E-01 | 4.84E-01 | 882.90   | not significant |
| 2180 | POLR3D     | -1.03 | 2.15E-01 | 4.81E-01 | 1796.41  | not significant |
| 2181 | OLA1       | -1.03 | 1.66E-01 | 4.18E-01 | 4986.32  | not significant |
| 2182 | C12orf49   | -1.03 | 2.00E-01 | 4.64E-01 | 2166.52  | not significant |
| 2183 | CFL1       | -1.03 | 1.57E-01 | 4.05E-01 | 34631.71 | not significant |
| 2184 | RALGAPB    | -1.03 | 1.73E-01 | 4.27E-01 | 4895.54  | not significant |
| 2185 | DNAJA3     | -1.03 | 1.55E-01 | 4.03E-01 | 4922.46  | not significant |
| 2186 | PIM1       | -1.03 | 1.12E-01 | 3.32E-01 | 8825.56  | not significant |
| 2187 | VPS13B     | -1.03 | 2.27E-01 | 4.95E-01 | 2535.76  | not significant |

|      |              |       |          |          |          |                 |
|------|--------------|-------|----------|----------|----------|-----------------|
| 2188 | ACTR1A       | -1.03 | 1.75E-01 | 4.31E-01 | 5326.25  | not significant |
| 2189 | ACSL4        | -1.03 | 1.76E-01 | 4.31E-01 | 2682.74  | not significant |
| 2190 | TSKU         | -1.03 | 1.80E-01 | 4.37E-01 | 255.73   | not significant |
| 2191 | MIIP         | -1.03 | 2.31E-01 | 4.99E-01 | 1067.79  | not significant |
| 2192 | MRPS7        | -1.03 | 2.17E-01 | 4.83E-01 | 3965.55  | not significant |
| 2193 | MYEF2        | -1.03 | 2.24E-01 | 4.92E-01 | 1258.65  | not significant |
| 2194 | NCOA6        | -1.03 | 2.17E-01 | 4.83E-01 | 4275.25  | not significant |
| 2195 | SFXN1        | -1.03 | 1.55E-01 | 4.04E-01 | 4760.05  | not significant |
| 2196 | MPRIP        | -1.03 | 2.20E-01 | 4.87E-01 | 6601.44  | not significant |
| 2197 | LACTB        | -1.03 | 1.33E-01 | 3.67E-01 | 164.47   | not significant |
| 2198 | AK6          | -1.03 | 2.00E-01 | 4.64E-01 | 335.58   | not significant |
| 2199 | ATG7         | -1.03 | 2.23E-01 | 4.89E-01 | 509.65   | not significant |
| 2200 | UTP3         | -1.03 | 2.06E-01 | 4.71E-01 | 2067.93  | not significant |
| 2201 | NCAPG        | -1.03 | 1.62E-01 | 4.13E-01 | 3704.62  | not significant |
| 2202 | ZNF460       | -1.03 | 5.88E-02 | 2.19E-01 | 136.68   | not significant |
| 2203 | AP5B1        | -1.03 | 2.27E-01 | 4.95E-01 | 1186.01  | not significant |
| 2204 | ELOF1        | -1.03 | 2.28E-01 | 4.95E-01 | 1467.36  | not significant |
| 2205 | RNGTT        | -1.03 | 2.00E-01 | 4.64E-01 | 2876.84  | not significant |
| 2206 | FKBP3        | -1.03 | 1.98E-01 | 4.62E-01 | 2474.61  | not significant |
| 2207 | VTA1         | -1.03 | 1.83E-01 | 4.40E-01 | 3326.01  | not significant |
| 2208 | CTRL         | -1.03 | 4.80E-02 | NA       | 74.39    | not significant |
| 2209 | LOC100506603 | -1.03 | 8.07E-02 | 2.68E-01 | 106.40   | not significant |
| 2210 | ZNF765       | -1.03 | 2.40E-01 | 5.08E-01 | 709.75   | not significant |
| 2211 | SUGT1        | -1.03 | 2.26E-01 | 4.94E-01 | 1909.02  | not significant |
| 2212 | REXO1        | -1.03 | 1.77E-01 | 4.33E-01 | 3324.94  | not significant |
| 2213 | SRSF11       | -1.03 | 1.29E-01 | 3.60E-01 | 6702.77  | not significant |
| 2214 | RGMA         | -1.03 | 9.07E-02 | 2.88E-01 | 114.75   | not significant |
| 2215 | TLDC1        | -1.03 | 1.26E-01 | 3.56E-01 | 162.80   | not significant |
| 2216 | ITGB1BP1     | -1.03 | 2.37E-01 | 5.04E-01 | 3083.40  | not significant |
| 2217 | TNRC6C       | -1.03 | 2.26E-01 | 4.94E-01 | 3334.21  | not significant |
| 2218 | NEK1         | -1.03 | 2.29E-01 | 4.97E-01 | 1114.02  | not significant |
| 2219 | CECR5        | -1.03 | 2.12E-01 | 4.76E-01 | 2925.42  | not significant |
| 2220 | DDX51        | -1.03 | 2.00E-01 | 4.64E-01 | 2704.64  | not significant |
| 2221 | USB1         | -1.03 | 1.75E-01 | 4.30E-01 | 3636.13  | not significant |
| 2222 | IFT27        | -1.03 | 1.96E-01 | 4.59E-01 | 320.80   | not significant |
| 2223 | TMEM237      | -1.03 | 2.30E-01 | 4.97E-01 | 1817.99  | not significant |
| 2224 | ARF4         | -1.03 | 1.88E-01 | 4.48E-01 | 3340.10  | not significant |
| 2225 | CLPP         | -1.03 | 2.05E-01 | 4.70E-01 | 3112.07  | not significant |
| 2226 | VPS26A       | -1.03 | 2.13E-01 | 4.79E-01 | 2241.69  | not significant |
| 2227 | TMEM184C     | -1.03 | 2.36E-01 | 5.03E-01 | 1852.94  | not significant |
| 2228 | SERP1        | -1.03 | 1.34E-01 | 3.69E-01 | 10080.63 | not significant |
| 2229 | EIF1         | -1.03 | 1.63E-01 | 4.14E-01 | 24295.09 | not significant |
| 2230 | PHLPP2       | -1.03 | 2.44E-01 | 5.11E-01 | 808.24   | not significant |
| 2231 | RIPK1        | -1.03 | 2.31E-01 | 4.99E-01 | 1405.04  | not significant |
| 2232 | SNAP29       | -1.03 | 2.30E-01 | 4.98E-01 | 1675.62  | not significant |
| 2233 | HNRNPUL2     | -1.03 | 2.04E-01 | 4.70E-01 | 4292.57  | not significant |
| 2234 | ADAR         | -1.03 | 1.71E-01 | 4.25E-01 | 16261.84 | not significant |
| 2235 | HYOU1        | -1.03 | 1.78E-01 | 4.35E-01 | 4913.48  | not significant |
| 2236 | SOBP         | -1.03 | 2.43E-01 | 5.11E-01 | 771.19   | not significant |
| 2237 | LRWD1        | -1.03 | 2.33E-01 | 5.00E-01 | 1840.98  | not significant |
| 2238 | IVD          | -1.03 | 2.14E-01 | 4.79E-01 | 2186.61  | not significant |
| 2239 | DPP3         | -1.03 | 1.92E-01 | 4.53E-01 | 4228.62  | not significant |
| 2240 | KIF3A        | -1.03 | 2.20E-01 | 4.86E-01 | 2155.02  | not significant |
| 2241 | ALKBH5       | -1.03 | 1.65E-01 | 4.17E-01 | 4751.54  | not significant |
| 2242 | AP1S1        | -1.03 | 2.43E-01 | 5.11E-01 | 1462.83  | not significant |
| 2243 | ATP5G1       | -1.03 | 2.33E-01 | 5.01E-01 | 2735.16  | not significant |
| 2244 | ZNF101       | -1.03 | 2.69E-01 | 5.39E-01 | 1079.71  | not significant |
| 2245 | SLC30A6      | -1.03 | 2.28E-01 | 4.95E-01 | 2095.22  | not significant |
| 2246 | RNF10        | -1.03 | 1.49E-01 | 3.96E-01 | 5839.68  | not significant |
| 2247 | NCAPD2       | -1.03 | 1.58E-01 | 4.06E-01 | 12848.82 | not significant |
| 2248 | ZNF420       | -1.03 | 2.20E-01 | 4.87E-01 | 423.29   | not significant |
| 2249 | FAM162A      | -1.03 | 2.46E-01 | 5.14E-01 | 1191.91  | not significant |
| 2250 | RFXANK       | -1.03 | 2.39E-01 | 5.07E-01 | 1207.01  | not significant |
| 2251 | TMPO-AS1     | -1.03 | 2.40E-01 | 5.08E-01 | 829.32   | not significant |
| 2252 | GGPS1        | -1.03 | 2.65E-01 | 5.36E-01 | 1015.50  | not significant |
| 2253 | GATC         | -1.03 | 2.11E-01 | 4.75E-01 | 2115.86  | not significant |
| 2254 | SF3B6        | -1.03 | 2.00E-01 | 4.64E-01 | 2827.25  | not significant |
| 2255 | CNST         | -1.03 | 2.28E-01 | 4.95E-01 | 1768.81  | not significant |
| 2256 | COPZ1        | -1.03 | 1.88E-01 | 4.47E-01 | 4429.71  | not significant |
| 2257 | CCDC25       | -1.03 | 2.06E-01 | 4.71E-01 | 2316.50  | not significant |
| 2258 | BICD2        | -1.03 | 2.10E-01 | 4.74E-01 | 2322.06  | not significant |
| 2259 | SEC14L2      | -1.03 | 2.32E-01 | 4.99E-01 | 465.05   | not significant |
| 2260 | NDUFAF6      | -1.03 | 2.47E-01 | 5.15E-01 | 731.11   | not significant |
| 2261 | DOLPP1       | -1.03 | 2.70E-01 | 5.40E-01 | 1018.14  | not significant |
| 2262 | CUL2         | -1.03 | 2.06E-01 | 4.71E-01 | 2567.39  | not significant |
| 2263 | UBQLN1       | -1.03 | 1.54E-01 | 4.02E-01 | 5486.74  | not significant |
| 2264 | ANKRD16      | -1.03 | 2.04E-01 | 4.69E-01 | 337.30   | not significant |
| 2265 | POLR2J       | -1.03 | 2.39E-01 | 5.07E-01 | 1233.98  | not significant |
| 2266 | RAB11FIP3    | -1.03 | 2.29E-01 | 4.96E-01 | 1809.50  | not significant |
| 2267 | LUZP1        | -1.03 | 1.98E-01 | 4.62E-01 | 2859.89  | not significant |
| 2268 | ZBTB44       | -1.03 | 1.82E-01 | 4.40E-01 | 4972.18  | not significant |
| 2269 | YWHAZ        | -1.03 | 1.05E-01 | 3.17E-01 | 32033.04 | not significant |
| 2270 | ZNF45        | -1.03 | 2.46E-01 | 5.14E-01 | 1204.97  | not significant |
| 2271 | TLK2         | -1.03 | 2.34E-01 | 5.01E-01 | 1645.28  | not significant |
| 2272 | APRT         | -1.03 | 2.23E-01 | 4.91E-01 | 4187.75  | not significant |
| 2273 | RAE1         | -1.03 | 2.09E-01 | 4.74E-01 | 2942.57  | not significant |
| 2274 | NFYB         | -1.03 | 2.22E-01 | 4.89E-01 | 1934.45  | not significant |
| 2275 | RGL1         | -1.03 | 9.14E-02 | 2.90E-01 | 110.83   | not significant |

|      |           |       |          |          |          |                 |
|------|-----------|-------|----------|----------|----------|-----------------|
| 2276 | FAM65A    | -1.03 | 2.59E-01 | 5.28E-01 | 821.85   | not significant |
| 2277 | POM121C   | -1.03 | 2.58E-01 | 5.28E-01 | 872.97   | not significant |
| 2278 | TPD52     | -1.03 | 1.98E-01 | 4.62E-01 | 3151.88  | not significant |
| 2279 | HDAC1     | -1.03 | 1.51E-01 | 3.98E-01 | 8791.73  | not significant |
| 2280 | TRIM62    | -1.03 | 2.40E-01 | 5.08E-01 | 546.40   | not significant |
| 2281 | PMS2      | -1.03 | 2.53E-01 | 5.22E-01 | 697.71   | not significant |
| 2282 | DARS      | -1.03 | 1.79E-01 | 4.36E-01 | 4675.54  | not significant |
| 2283 | NUDT21    | -1.03 | 1.36E-01 | 3.74E-01 | 11319.25 | not significant |
| 2284 | NOMO2     | -1.03 | 2.08E-01 | 4.72E-01 | 337.22   | not significant |
| 2285 | RANBP1    | -1.03 | 1.87E-01 | 4.46E-01 | 9573.86  | not significant |
| 2286 | PPIA      | -1.03 | 1.68E-01 | 4.21E-01 | 27779.23 | not significant |
| 2287 | PFKFB4    | -1.02 | 5.58E-02 | NA       | 78.69    | not significant |
| 2288 | ZNF257    | -1.02 | 1.52E-01 | 3.99E-01 | 172.17   | not significant |
| 2289 | LOC728485 | -1.02 | 1.64E-01 | 4.15E-01 | 205.39   | not significant |
| 2290 | DZIP3     | -1.02 | 2.28E-01 | 4.95E-01 | 523.36   | not significant |
| 2291 | MYBL1     | -1.02 | 2.55E-01 | 5.23E-01 | 1142.29  | not significant |
| 2292 | SQSTM1    | -1.02 | 2.33E-01 | 5.00E-01 | 1956.88  | not significant |
| 2293 | NAPG      | -1.02 | 2.35E-01 | 5.02E-01 | 1753.33  | not significant |
| 2294 | PRKX      | -1.02 | 2.18E-01 | 4.84E-01 | 2337.80  | not significant |
| 2295 | PAFAH1B2  | -1.02 | 2.06E-01 | 4.71E-01 | 2638.96  | not significant |
| 2296 | C6orf106  | -1.02 | 1.90E-01 | 4.50E-01 | 3980.80  | not significant |
| 2297 | RBM26     | -1.02 | 1.90E-01 | 4.50E-01 | 4276.68  | not significant |
| 2298 | ZNF385A   | -1.02 | 8.12E-02 | 2.69E-01 | 107.50   | not significant |
| 2299 | TBL2      | -1.02 | 1.68E-01 | 4.21E-01 | 224.97   | not significant |
| 2300 | C2orf47   | -1.02 | 2.53E-01 | 5.21E-01 | 637.59   | not significant |
| 2301 | ENAH      | -1.02 | 3.00E-01 | 5.70E-01 | 524.32   | not significant |
| 2302 | MRPL46    | -1.02 | 2.48E-01 | 5.16E-01 | 637.99   | not significant |
| 2303 | EMC4      | -1.02 | 2.33E-01 | 5.00E-01 | 1970.97  | not significant |
| 2304 | PSMA5     | -1.02 | 1.81E-01 | 4.38E-01 | 6466.45  | not significant |
| 2305 | ZNF317    | -1.02 | 2.15E-01 | 4.81E-01 | 2401.36  | not significant |
| 2306 | GRB2      | -1.02 | 1.28E-01 | 3.59E-01 | 15646.58 | not significant |
| 2307 | MT1G      | -1.02 | 2.60E-01 | 5.29E-01 | 15256.97 | not significant |
| 2308 | MLF2      | -1.02 | 2.00E-01 | 4.64E-01 | 5137.17  | not significant |
| 2309 | AIMP1     | -1.02 | 1.95E-01 | 4.57E-01 | 2757.20  | not significant |
| 2310 | PSMB2     | -1.02 | 1.61E-01 | 4.11E-01 | 10731.97 | not significant |
| 2311 | IRF1      | -1.02 | 1.51E-01 | 3.98E-01 | 8419.49  | not significant |
| 2312 | ZNF552    | -1.02 | 1.55E-01 | 4.04E-01 | 186.65   | not significant |
| 2313 | BBS9      | -1.02 | 1.34E-01 | 3.70E-01 | 154.16   | not significant |
| 2314 | LINC00977 | -1.02 | 2.52E-01 | 5.21E-01 | 629.42   | not significant |
| 2315 | PLIN3     | -1.02 | 2.37E-01 | 5.05E-01 | 1965.35  | not significant |
| 2316 | AFTPH     | -1.02 | 2.42E-01 | 5.10E-01 | 1324.45  | not significant |
| 2317 | JMJD8     | -1.02 | 2.44E-01 | 5.11E-01 | 1489.43  | not significant |
| 2318 | SNW1      | -1.02 | 2.18E-01 | 4.85E-01 | 2661.38  | not significant |
| 2319 | SLC16A1   | -1.02 | 1.76E-01 | 4.31E-01 | 8578.47  | not significant |
| 2320 | CAD       | -1.02 | 1.67E-01 | 4.20E-01 | 9339.62  | not significant |
| 2321 | COQ3      | -1.02 | 2.45E-01 | 5.13E-01 | 490.04   | not significant |
| 2322 | TMEM138   | -1.02 | 2.53E-01 | 5.21E-01 | 858.81   | not significant |
| 2323 | ERCC3     | -1.02 | 2.02E-01 | 4.67E-01 | 2742.01  | not significant |
| 2324 | MAP4      | -1.02 | 1.57E-01 | 4.05E-01 | 8133.37  | not significant |
| 2325 | PKNOX1    | -1.02 | 2.53E-01 | 5.22E-01 | 663.26   | not significant |
| 2326 | PLAGL1    | -1.02 | 2.54E-01 | 5.22E-01 | 651.26   | not significant |
| 2327 | MED21     | -1.02 | 2.44E-01 | 5.12E-01 | 1296.08  | not significant |
| 2328 | LIN7C     | -1.02 | 2.53E-01 | 5.22E-01 | 1168.97  | not significant |
| 2329 | PRDX6     | -1.02 | 2.12E-01 | 4.77E-01 | 5672.66  | not significant |
| 2330 | CENPO     | -1.02 | 2.00E-01 | 4.64E-01 | 3196.75  | not significant |
| 2331 | CCDC117   | -1.02 | 1.76E-01 | 4.31E-01 | 3970.13  | not significant |
| 2332 | DDX3Y     | -1.02 | 1.96E-01 | 4.58E-01 | 5905.94  | not significant |
| 2333 | SCMH1     | -1.02 | 2.39E-01 | 5.07E-01 | 2133.10  | not significant |
| 2334 | PPP5C     | -1.02 | 2.05E-01 | 4.70E-01 | 3399.77  | not significant |
| 2335 | JTB       | -1.02 | 2.03E-01 | 4.69E-01 | 4822.38  | not significant |
| 2336 | VANGL1    | -1.02 | 1.71E-01 | 4.25E-01 | 10734.50 | not significant |
| 2337 | STX8      | -1.02 | 2.50E-01 | 5.18E-01 | 611.30   | not significant |
| 2338 | GPD1L     | -1.02 | 2.57E-01 | 5.25E-01 | 637.26   | not significant |
| 2339 | ZNF330    | -1.02 | 2.43E-01 | 5.11E-01 | 1690.82  | not significant |
| 2340 | ARL5B     | -1.02 | 2.71E-01 | 5.42E-01 | 1580.78  | not significant |
| 2341 | SNRPC     | -1.02 | 2.14E-01 | 4.79E-01 | 4192.04  | not significant |
| 2342 | BCORL1    | -1.02 | 2.47E-01 | 5.15E-01 | 1400.00  | not significant |
| 2343 | UBA2      | -1.02 | 1.78E-01 | 4.34E-01 | 7276.14  | not significant |
| 2344 | PFKFB2    | -1.02 | 1.58E-01 | 4.06E-01 | 185.64   | not significant |
| 2345 | MED26     | -1.02 | 2.57E-01 | 5.25E-01 | 653.66   | not significant |
| 2346 | RAP1A     | -1.02 | 2.47E-01 | 5.15E-01 | 2132.92  | not significant |
| 2347 | RAD51C    | -1.02 | 2.31E-01 | 4.99E-01 | 2100.86  | not significant |
| 2348 | PSMA4     | -1.02 | 1.89E-01 | 4.49E-01 | 5103.07  | not significant |
| 2349 | HK1       | -1.02 | 1.98E-01 | 4.62E-01 | 3518.27  | not significant |
| 2350 | CCDC163P  | -1.02 | 1.74E-01 | 4.30E-01 | 200.20   | not significant |
| 2351 | ZNF593    | -1.02 | 2.38E-01 | 5.06E-01 | 437.20   | not significant |
| 2352 | BAG3      | -1.02 | 2.59E-01 | 5.28E-01 | 893.54   | not significant |
| 2353 | MTAP      | -1.02 | 2.10E-01 | 4.74E-01 | 3316.33  | not significant |
| 2354 | CYP27B1   | -1.02 | 1.44E-01 | 3.87E-01 | 159.06   | not significant |
| 2355 | FGR       | -1.02 | 1.70E-01 | 4.24E-01 | 190.56   | not significant |
| 2356 | USP46     | -1.02 | 2.22E-01 | 4.89E-01 | 347.75   | not significant |
| 2357 | DHRS4-AS1 | -1.02 | 2.71E-01 | 5.42E-01 | 745.85   | not significant |
| 2358 | SPATA5    | -1.02 | 2.51E-01 | 5.20E-01 | 1283.03  | not significant |
| 2359 | EIF1AY    | -1.02 | 2.40E-01 | 5.08E-01 | 3511.12  | not significant |
| 2360 | COPS5     | -1.02 | 2.19E-01 | 4.86E-01 | 3412.81  | not significant |
| 2361 | OTUD4     | -1.02 | 2.42E-01 | 5.10E-01 | 2702.74  | not significant |
| 2362 | PRPF38B   | -1.02 | 1.90E-01 | 4.49E-01 | 4078.69  | not significant |
| 2363 | ARMC8     | -1.02 | 2.45E-01 | 5.13E-01 | 2054.05  | not significant |

|      |              |       |          |          |           |                 |
|------|--------------|-------|----------|----------|-----------|-----------------|
| 2364 | IL17RA       | -1.02 | 2.42E-01 | 5.11E-01 | 2618.11   | not significant |
| 2365 | SDHD         | -1.02 | 2.11E-01 | 4.75E-01 | 3292.27   | not significant |
| 2366 | ANAPC5       | -1.02 | 1.87E-01 | 4.45E-01 | 5853.82   | not significant |
| 2367 | RIMBP2       | -1.02 | 6.91E-02 | NA       | 84.66     | not significant |
| 2368 | CDKL1        | -1.02 | 1.42E-01 | 3.84E-01 | 172.92    | not significant |
| 2369 | TMED8        | -1.02 | 2.14E-01 | 4.79E-01 | 350.62    | not significant |
| 2370 | LOC103344931 | -1.02 | 2.24E-01 | 4.91E-01 | 314.89    | not significant |
| 2371 | DHX16        | -1.02 | 2.67E-01 | 5.38E-01 | 832.66    | not significant |
| 2372 | PIK3CB       | -1.02 | 2.52E-01 | 5.21E-01 | 1376.19   | not significant |
| 2373 | H3F3B        | -1.02 | 1.85E-01 | 4.44E-01 | 29262.64  | not significant |
| 2374 | COX16        | -1.02 | 1.16E-01 | 3.38E-01 | 160.28    | not significant |
| 2375 | XXYL1        | -1.02 | 2.70E-01 | 5.40E-01 | 935.76    | not significant |
| 2376 | ANP32E       | -1.02 | 2.66E-01 | 5.37E-01 | 1583.57   | not significant |
| 2377 | MRPS17       | -1.02 | 2.69E-01 | 5.39E-01 | 862.87    | not significant |
| 2378 | FNBP1L       | -1.02 | 2.66E-01 | 5.37E-01 | 1167.34   | not significant |
| 2379 | URI1         | -1.02 | 2.34E-01 | 5.01E-01 | 3255.96   | not significant |
| 2380 | ATAD3A       | -1.02 | 2.32E-01 | 4.99E-01 | 3008.34   | not significant |
| 2381 | FUS          | -1.02 | 1.58E-01 | 4.06E-01 | 17571.80  | not significant |
| 2382 | GNB1         | -1.02 | 1.64E-01 | 4.14E-01 | 20046.78  | not significant |
| 2383 | ZNF567       | -1.02 | 2.64E-01 | 5.35E-01 | 606.70    | not significant |
| 2384 | EMC3         | -1.02 | 2.80E-01 | 5.51E-01 | 1569.06   | not significant |
| 2385 | NOM1         | -1.02 | 2.37E-01 | 5.05E-01 | 2487.49   | not significant |
| 2386 | CHERP        | -1.02 | 1.86E-01 | 4.44E-01 | 5918.28   | not significant |
| 2387 | ZNF736       | -1.02 | 2.58E-01 | 5.27E-01 | 1433.91   | not significant |
| 2388 | SLC9A3R1     | -1.02 | 1.37E-01 | 3.75E-01 | 14308.29  | not significant |
| 2389 | ATP6AP1L     | -1.02 | 1.50E-01 | 3.97E-01 | 160.36    | not significant |
| 2390 | COMMD1       | -1.02 | 2.56E-01 | 5.24E-01 | 485.92    | not significant |
| 2391 | NR2F6        | -1.02 | 2.52E-01 | 5.21E-01 | 434.30    | not significant |
| 2392 | ZNF526       | -1.02 | 2.68E-01 | 5.39E-01 | 621.58    | not significant |
| 2393 | TROAP        | -1.02 | 2.54E-01 | 5.23E-01 | 2647.87   | not significant |
| 2394 | RELA         | -1.02 | 2.31E-01 | 4.99E-01 | 2826.67   | not significant |
| 2395 | CERK         | -1.02 | 2.13E-01 | 4.78E-01 | 3820.45   | not significant |
| 2396 | GAPDH        | -1.02 | 2.06E-01 | 4.71E-01 | 183429.09 | not significant |
| 2397 | SNX20        | -1.02 | 1.68E-01 | 4.21E-01 | 170.72    | not significant |
| 2398 | CEP19        | -1.02 | 2.34E-01 | 5.01E-01 | 340.83    | not significant |
| 2399 | IFRD2        | -1.02 | 2.62E-01 | 5.32E-01 | 1225.49   | not significant |
| 2400 | TPD52L2      | -1.02 | 2.46E-01 | 5.13E-01 | 3006.15   | not significant |
| 2401 | MPHOSPH9     | -1.02 | 2.28E-01 | 4.95E-01 | 3183.13   | not significant |
| 2402 | ARHGAP11B    | -1.02 | 1.24E-01 | 3.52E-01 | 124.55    | not significant |
| 2403 | ANKRD42      | -1.02 | 1.28E-01 | 3.60E-01 | 138.17    | not significant |
| 2404 | ZNF530       | -1.02 | 2.61E-01 | 5.31E-01 | 470.81    | not significant |
| 2405 | ALDOC        | -1.02 | 2.40E-01 | 5.08E-01 | 373.04    | not significant |
| 2406 | TCEB2        | -1.02 | 2.66E-01 | 5.37E-01 | 2690.02   | not significant |
| 2407 | LYPLA2       | -1.02 | 2.54E-01 | 5.23E-01 | 2167.25   | not significant |
| 2408 | ZNF605       | -1.02 | 2.61E-01 | 5.30E-01 | 491.91    | not significant |
| 2409 | SLC25A20     | -1.02 | 2.69E-01 | 5.40E-01 | 1080.65   | not significant |
| 2410 | LOC100996286 | -1.02 | 2.74E-01 | 5.44E-01 | 815.79    | not significant |
| 2411 | ZNF788       | -1.02 | 2.73E-01 | 5.43E-01 | 648.70    | not significant |
| 2412 | CREM         | -1.02 | 2.78E-01 | 5.48E-01 | 955.44    | not significant |
| 2413 | SERF2        | -1.02 | 2.67E-01 | 5.38E-01 | 3946.58   | not significant |
| 2414 | ZDHHHC6      | -1.02 | 2.32E-01 | 5.00E-01 | 2689.45   | not significant |
| 2415 | B3GNT2       | -1.02 | 2.40E-01 | 5.08E-01 | 2569.41   | not significant |
| 2416 | ZC3H14       | -1.02 | 2.49E-01 | 5.17E-01 | 2196.28   | not significant |
| 2417 | CSK          | -1.02 | 2.08E-01 | 4.73E-01 | 5983.98   | not significant |
| 2418 | SEMA7A       | -1.02 | 2.43E-01 | 5.11E-01 | 2758.99   | not significant |
| 2419 | EXD2         | -1.02 | 2.71E-01 | 5.42E-01 | 548.53    | not significant |
| 2420 | HIMBS        | -1.02 | 2.78E-01 | 5.48E-01 | 1283.38   | not significant |
| 2421 | VBP1         | -1.02 | 2.92E-01 | 5.64E-01 | 864.26    | not significant |
| 2422 | COA4         | -1.02 | 2.74E-01 | 5.45E-01 | 1435.86   | not significant |
| 2423 | ZNF501       | -1.02 | 1.91E-01 | 4.51E-01 | 201.81    | not significant |
| 2424 | PPP1R13L     | -1.02 | 2.05E-01 | 4.70E-01 | 240.24    | not significant |
| 2425 | CCDC92       | -1.02 | 2.68E-01 | 5.39E-01 | 1181.40   | not significant |
| 2426 | COPS6        | -1.02 | 2.50E-01 | 5.18E-01 | 3750.87   | not significant |
| 2427 | AIFM1        | -1.02 | 2.51E-01 | 5.20E-01 | 2039.04   | not significant |
| 2428 | RABGEF1      | -1.02 | 2.53E-01 | 5.21E-01 | 1959.65   | not significant |
| 2429 | BRAP         | -1.02 | 2.66E-01 | 5.37E-01 | 1812.84   | not significant |
| 2430 | VPS26B       | -1.02 | 2.13E-01 | 4.78E-01 | 3955.32   | not significant |
| 2431 | KCTD20       | -1.02 | 1.91E-01 | 4.51E-01 | 5713.31   | not significant |
| 2432 | LPCAT3       | -1.02 | 2.66E-01 | 5.37E-01 | 527.76    | not significant |
| 2433 | BPNT1        | -1.02 | 2.68E-01 | 5.39E-01 | 1230.47   | not significant |
| 2434 | AKT3         | -1.02 | 2.75E-01 | 5.45E-01 | 1138.24   | not significant |
| 2435 | C12orf29     | -1.02 | 2.71E-01 | 5.42E-01 | 1562.56   | not significant |
| 2436 | ZNF674       | -1.02 | 1.30E-01 | 3.62E-01 | 121.54    | not significant |
| 2437 | TRIM32       | -1.02 | 2.68E-01 | 5.39E-01 | 527.19    | not significant |
| 2438 | ZCCHC4       | -1.02 | 2.74E-01 | 5.45E-01 | 549.41    | not significant |
| 2439 | TBC1D22A     | -1.02 | 2.82E-01 | 5.53E-01 | 1083.47   | not significant |
| 2440 | ANKRD54      | -1.02 | 2.78E-01 | 5.48E-01 | 769.41    | not significant |
| 2441 | PDRG1        | -1.02 | 2.78E-01 | 5.48E-01 | 1146.75   | not significant |
| 2442 | EIF3G        | -1.02 | 2.23E-01 | 4.90E-01 | 6195.72   | not significant |
| 2443 | YWHAH        | -1.02 | 2.17E-01 | 4.83E-01 | 5282.22   | not significant |
| 2444 | N4BP1        | -1.02 | 2.68E-01 | 5.39E-01 | 1762.18   | not significant |
| 2445 | CPSF6        | -1.02 | 1.86E-01 | 4.44E-01 | 7368.13   | not significant |
| 2446 | AHRR         | -1.02 | 2.24E-01 | 4.92E-01 | 266.32    | not significant |
| 2447 | KCNMB4       | -1.02 | 1.79E-01 | 4.36E-01 | 181.29    | not significant |
| 2448 | COQ6         | -1.02 | 2.71E-01 | 5.42E-01 | 510.27    | not significant |
| 2449 | C10orf88     | -1.02 | 2.93E-01 | 5.64E-01 | 568.58    | not significant |
| 2450 | RNF185       | -1.02 | 2.68E-01 | 5.38E-01 | 1357.04   | not significant |
| 2451 | ATL2         | -1.02 | 2.38E-01 | 5.06E-01 | 2963.48   | not significant |

|      |           |       |          |          |          |                 |
|------|-----------|-------|----------|----------|----------|-----------------|
| 2452 | SFSWAP    | -1.02 | 2.35E-01 | 5.02E-01 | 3019.97  | not significant |
| 2453 | ZSWIM3    | -1.02 | 2.45E-01 | 5.13E-01 | 347.24   | not significant |
| 2454 | CASC5     | -1.02 | 2.82E-01 | 5.53E-01 | 2302.79  | not significant |
| 2455 | SETD2     | -1.02 | 2.65E-01 | 5.36E-01 | 5197.70  | not significant |
| 2456 | PRRC2A    | -1.02 | 2.19E-01 | 4.86E-01 | 6318.55  | not significant |
| 2457 | HNRNPA3   | -1.02 | 1.89E-01 | 4.48E-01 | 20697.53 | not significant |
| 2458 | ACSL3     | -1.02 | 2.43E-01 | 5.11E-01 | 3130.64  | not significant |
| 2459 | STXBP4    | -1.02 | 2.04E-01 | 4.69E-01 | 213.42   | not significant |
| 2460 | ITGB3BP   | -1.02 | 2.63E-01 | 5.33E-01 | 821.14   | not significant |
| 2461 | OPA3      | -1.02 | 2.83E-01 | 5.53E-01 | 1229.31  | not significant |
| 2462 | C2orf43   | -1.02 | 2.69E-01 | 5.40E-01 | 1934.06  | not significant |
| 2463 | SH3PXD2B  | -1.02 | 6.73E-02 | NA       | 70.87    | not significant |
| 2464 | RAB4A     | -1.02 | 2.82E-01 | 5.53E-01 | 849.00   | not significant |
| 2465 | APOBEC3D  | -1.02 | 2.84E-01 | 5.54E-01 | 617.46   | not significant |
| 2466 | UBN2      | -1.02 | 2.90E-01 | 5.61E-01 | 1068.20  | not significant |
| 2467 | NFXL1     | -1.02 | 2.85E-01 | 5.55E-01 | 778.48   | not significant |
| 2468 | MCMBP     | -1.02 | 1.80E-01 | 4.37E-01 | 6836.25  | not significant |
| 2469 | DGKZ      | -1.02 | 1.86E-01 | 4.44E-01 | 5602.33  | not significant |
| 2470 | CALU      | -1.02 | 1.94E-01 | 4.55E-01 | 5908.63  | not significant |
| 2471 | CCDC181   | -1.02 | 5.73E-02 | NA       | 65.63    | not significant |
| 2472 | SESN1     | -1.02 | 2.82E-01 | 5.53E-01 | 577.66   | not significant |
| 2473 | NLGN4X    | -1.02 | 2.72E-01 | 5.43E-01 | 517.93   | not significant |
| 2474 | ATRX      | -1.02 | 2.71E-01 | 5.42E-01 | 711.41   | not significant |
| 2475 | EPC2      | -1.02 | 2.82E-01 | 5.53E-01 | 1066.46  | not significant |
| 2476 | PCYOX1    | -1.02 | 2.71E-01 | 5.42E-01 | 1392.54  | not significant |
| 2477 | QKI       | -1.02 | 2.13E-01 | 4.78E-01 | 4207.64  | not significant |
| 2478 | GTSF1     | -1.02 | 2.19E-01 | 4.86E-01 | 247.27   | not significant |
| 2479 | G6PD      | -1.02 | 2.85E-01 | 5.55E-01 | 1567.35  | not significant |
| 2480 | UPF2      | -1.02 | 2.84E-01 | 5.54E-01 | 1748.46  | not significant |
| 2481 | DNAJB11   | -1.02 | 2.34E-01 | 5.01E-01 | 3464.21  | not significant |
| 2482 | RHOQ      | -1.02 | 2.49E-01 | 5.16E-01 | 298.79   | not significant |
| 2483 | LINC00641 | -1.02 | 2.55E-01 | 5.24E-01 | 359.19   | not significant |
| 2484 | RILPL2    | -1.02 | 2.85E-01 | 5.55E-01 | 1596.87  | not significant |
| 2485 | FAM120AOS | -1.02 | 2.77E-01 | 5.47E-01 | 1263.89  | not significant |
| 2486 | DCLRE1A   | -1.02 | 2.73E-01 | 5.43E-01 | 1345.84  | not significant |
| 2487 | LZTFL1    | -1.02 | 2.49E-01 | 5.16E-01 | 2945.19  | not significant |
| 2488 | CCDC152   | -1.02 | 2.66E-01 | 5.37E-01 | 2034.42  | not significant |
| 2489 | CTSB      | -1.02 | 1.98E-01 | 4.62E-01 | 4982.16  | not significant |
| 2490 | HIATL2    | -1.02 | 1.61E-01 | NA       | 94.60    | not significant |
| 2491 | CREB3L3   | -1.02 | 1.47E-01 | 3.92E-01 | 131.49   | not significant |
| 2492 | ZNF17     | -1.02 | 2.59E-01 | 5.28E-01 | 367.63   | not significant |
| 2493 | SH3BP1    | -1.02 | 2.82E-01 | 5.52E-01 | 1284.58  | not significant |
| 2494 | HPS3      | -1.02 | 2.92E-01 | 5.64E-01 | 1142.13  | not significant |
| 2495 | IRAK1     | -1.02 | 2.81E-01 | 5.52E-01 | 1654.81  | not significant |
| 2496 | EARS2     | -1.02 | 2.72E-01 | 5.42E-01 | 1642.06  | not significant |
| 2497 | OAS2      | -1.02 | 2.61E-01 | 5.30E-01 | 2965.82  | not significant |
| 2498 | NAA60     | -1.02 | 2.45E-01 | 5.13E-01 | 2723.11  | not significant |
| 2499 | MORF4L2   | -1.02 | 2.19E-01 | 4.86E-01 | 5461.11  | not significant |
| 2500 | U2SURP    | -1.02 | 1.89E-01 | 4.48E-01 | 7740.67  | not significant |
| 2501 | ATG4A     | -1.02 | 2.73E-01 | 5.43E-01 | 493.37   | not significant |
| 2502 | PMS2CL    | -1.02 | 2.57E-01 | 5.26E-01 | 374.63   | not significant |
| 2503 | EXOSC3    | -1.02 | 2.77E-01 | 5.47E-01 | 2056.36  | not significant |
| 2504 | CHMP2A    | -1.02 | 2.84E-01 | 5.54E-01 | 1222.34  | not significant |
| 2505 | VPRBP     | -1.02 | 2.99E-01 | 5.70E-01 | 951.74   | not significant |
| 2506 | KIRREL    | -1.02 | 3.17E-01 | 5.87E-01 | 1259.08  | not significant |
| 2507 | CASC4     | -1.02 | 2.81E-01 | 5.51E-01 | 1805.26  | not significant |
| 2508 | HBS1L     | -1.02 | 2.34E-01 | 5.01E-01 | 3573.31  | not significant |
| 2509 | UBASH3B   | -1.02 | 1.70E-01 | 4.24E-01 | 11822.81 | not significant |
| 2510 | CHCHD6    | -1.02 | 2.64E-01 | 5.35E-01 | 425.33   | not significant |
| 2511 | METTL21B  | -1.02 | 2.76E-01 | 5.46E-01 | 491.53   | not significant |
| 2512 | TMOD2     | -1.02 | 2.88E-01 | 5.59E-01 | 859.95   | not significant |
| 2513 | PIGN      | -1.02 | 3.06E-01 | 5.78E-01 | 1584.67  | not significant |
| 2514 | TSPYL5    | -1.02 | 2.54E-01 | 5.22E-01 | 2495.91  | not significant |
| 2515 | MIER1     | -1.02 | 2.61E-01 | 5.31E-01 | 2308.91  | not significant |
| 2516 | CD2AP     | -1.02 | 2.42E-01 | 5.10E-01 | 3901.23  | not significant |
| 2517 | CNOT2     | -1.02 | 2.28E-01 | 4.95E-01 | 4350.12  | not significant |
| 2518 | EP300     | -1.02 | 2.76E-01 | 5.47E-01 | 3658.60  | not significant |
| 2519 | TAGAP     | -1.02 | 2.93E-01 | 5.64E-01 | 580.09   | not significant |
| 2520 | HIBCH     | -1.02 | 3.00E-01 | 5.70E-01 | 1008.34  | not significant |
| 2521 | BBX       | -1.02 | 2.92E-01 | 5.63E-01 | 2814.57  | not significant |
| 2522 | TBC1D22B  | -1.02 | 2.73E-01 | 5.43E-01 | 1920.68  | not significant |
| 2523 | BAG5      | -1.02 | 2.48E-01 | 5.16E-01 | 3021.43  | not significant |
| 2524 | ZSCAN22   | -1.02 | 1.77E-01 | 4.34E-01 | 178.21   | not significant |
| 2525 | BECN1     | -1.02 | 2.85E-01 | 5.56E-01 | 2061.03  | not significant |
| 2526 | GNAI3     | -1.02 | 2.32E-01 | 4.99E-01 | 4873.04  | not significant |
| 2527 | SLC39A9   | -1.02 | 2.47E-01 | 5.15E-01 | 4218.56  | not significant |
| 2528 | DOK4      | -1.02 | 2.44E-01 | 5.12E-01 | 270.48   | not significant |
| 2529 | FAM3C     | -1.02 | 2.56E-01 | 5.25E-01 | 328.96   | not significant |
| 2530 | HIPK2     | -1.02 | 2.81E-01 | 5.52E-01 | 3387.16  | not significant |
| 2531 | ZNF770    | -1.02 | 2.70E-01 | 5.41E-01 | 2322.44  | not significant |
| 2532 | CCNY      | -1.02 | 2.28E-01 | 4.95E-01 | 4177.29  | not significant |
| 2533 | PSD4      | -1.02 | 2.33E-01 | 5.01E-01 | 6976.43  | not significant |
| 2534 | SIPA1L2   | -1.02 | 2.76E-02 | NA       | 44.07    | not significant |
| 2535 | RARG      | -1.02 | 1.57E-01 | 4.05E-01 | 138.32   | not significant |
| 2536 | FRRS1     | -1.02 | 2.08E-01 | 4.73E-01 | 208.16   | not significant |
| 2537 | ZMYM1     | -1.02 | 3.00E-01 | 5.70E-01 | 664.61   | not significant |
| 2538 | PAF1      | -1.02 | 2.88E-01 | 5.59E-01 | 2352.56  | not significant |
| 2539 | ACTR8     | -1.02 | 2.93E-01 | 5.65E-01 | 1261.00  | not significant |



|      |             |       |          |          |          |                 |
|------|-------------|-------|----------|----------|----------|-----------------|
| 2540 | USP42       | -1.02 | 2.77E-01 | 5.47E-01 | 2152.75  | not significant |
| 2541 | LSM11       | -1.02 | 2.60E-01 | 5.30E-01 | 491.30   | not significant |
| 2542 | ZNF584      | -1.02 | 2.92E-01 | 5.64E-01 | 523.57   | not significant |
| 2543 | MKNK1       | -1.02 | 2.89E-01 | 5.60E-01 | 520.39   | not significant |
| 2544 | COMMD9      | -1.02 | 2.86E-01 | 5.57E-01 | 1351.53  | not significant |
| 2545 | CCDC66      | -1.02 | 2.87E-01 | 5.58E-01 | 805.27   | not significant |
| 2546 | THOC5       | -1.02 | 3.03E-01 | 5.74E-01 | 1830.15  | not significant |
| 2547 | EIF4G3      | -1.02 | 2.82E-01 | 5.53E-01 | 2994.05  | not significant |
| 2548 | ANKIB1      | -1.02 | 2.72E-01 | 5.42E-01 | 2823.43  | not significant |
| 2549 | GORASP2     | -1.02 | 2.24E-01 | 4.91E-01 | 4465.93  | not significant |
| 2550 | GPBP1       | -1.02 | 2.24E-01 | 4.91E-01 | 4285.74  | not significant |
| 2551 | SMARCE1     | -1.02 | 1.83E-01 | 4.41E-01 | 8472.30  | not significant |
| 2552 | ATRN        | -1.02 | 1.26E-01 | 3.55E-01 | 115.44   | not significant |
| 2553 | SPSB1       | -1.02 | 2.99E-01 | 5.70E-01 | 566.30   | not significant |
| 2554 | SOGA1       | -1.02 | 2.92E-01 | 5.63E-01 | 1044.73  | not significant |
| 2555 | ZNF675      | -1.02 | 3.06E-01 | 5.78E-01 | 941.29   | not significant |
| 2556 | ATP6V0E2    | -1.02 | 2.95E-01 | 5.66E-01 | 1163.91  | not significant |
| 2557 | FNIP2       | -1.02 | 2.90E-01 | 5.62E-01 | 1283.20  | not significant |
| 2558 | ZBTB48      | -1.02 | 2.71E-01 | 5.42E-01 | 644.88   | not significant |
| 2559 | TBC1D23     | -1.02 | 3.06E-01 | 5.78E-01 | 1084.49  | not significant |
| 2560 | LRR1        | -1.02 | 2.92E-01 | 5.63E-01 | 1692.32  | not significant |
| 2561 | SNRPA1      | -1.02 | 2.86E-01 | 5.57E-01 | 2455.64  | not significant |
| 2562 | NCOA2       | -1.02 | 2.92E-01 | 5.64E-01 | 1850.88  | not significant |
| 2563 | CFAP36      | -1.02 | 2.84E-01 | 5.55E-01 | 529.78   | not significant |
| 2564 | PHF5A       | -1.02 | 2.80E-01 | 5.51E-01 | 2970.77  | not significant |
| 2565 | CAPZA2      | -1.02 | 2.75E-01 | 5.46E-01 | 3532.57  | not significant |
| 2566 | FBXO5       | -1.02 | 2.76E-01 | 5.47E-01 | 2525.92  | not significant |
| 2567 | GLE1        | -1.02 | 2.88E-01 | 5.59E-01 | 2171.24  | not significant |
| 2568 | PSMD13      | -1.02 | 2.43E-01 | 5.11E-01 | 5520.33  | not significant |
| 2569 | PC          | -1.02 | 3.11E-01 | 5.83E-01 | 941.36   | not significant |
| 2570 | PDCL3       | -1.02 | 2.97E-01 | 5.68E-01 | 1297.12  | not significant |
| 2571 | SLC4A1AP    | -1.02 | 3.07E-01 | 5.78E-01 | 1170.73  | not significant |
| 2572 | FBXO42      | -1.02 | 3.09E-01 | 5.80E-01 | 984.98   | not significant |
| 2573 | C9orf114    | -1.02 | 2.87E-01 | 5.58E-01 | 2011.03  | not significant |
| 2574 | MRPL38      | -1.02 | 2.92E-01 | 5.63E-01 | 3450.23  | not significant |
| 2575 | SNRPB2      | -1.02 | 2.51E-01 | 5.19E-01 | 4501.79  | not significant |
| 2576 | LOC728084   | -1.02 | 2.75E-01 | 5.46E-01 | 2865.05  | not significant |
| 2577 | VPS36       | -1.02 | 2.57E-01 | 5.26E-01 | 3033.88  | not significant |
| 2578 | OXSM        | -1.02 | 2.48E-01 | 5.16E-01 | 311.42   | not significant |
| 2579 | NKG7        | -1.02 | 2.93E-01 | 5.64E-01 | 1348.84  | not significant |
| 2580 | CSDE1       | -1.02 | 1.74E-01 | 4.30E-01 | 21064.67 | not significant |
| 2581 | COMMD10     | -1.02 | 3.12E-01 | 5.84E-01 | 850.40   | not significant |
| 2582 | GEMIN6      | -1.02 | 3.13E-01 | 5.84E-01 | 791.03   | not significant |
| 2583 | CTDP1       | -1.02 | 2.96E-01 | 5.66E-01 | 1881.64  | not significant |
| 2584 | ZNF689      | -1.02 | 2.96E-01 | 5.67E-01 | 1481.83  | not significant |
| 2585 | APOL6       | -1.02 | 2.79E-01 | 5.50E-01 | 7191.87  | not significant |
| 2586 | DLD         | -1.02 | 2.45E-01 | 5.12E-01 | 4525.51  | not significant |
| 2587 | GHITM       | -1.02 | 2.65E-01 | 5.35E-01 | 6778.69  | not significant |
| 2588 | TESPA1      | -1.02 | 2.23E-01 | 4.89E-01 | 8072.08  | not significant |
| 2589 | GREB1       | -1.02 | 2.21E-01 | 4.88E-01 | 229.39   | not significant |
| 2590 | COA6        | -1.02 | 3.11E-01 | 5.83E-01 | 895.54   | not significant |
| 2591 | CDYL        | -1.02 | 3.13E-01 | 5.84E-01 | 909.55   | not significant |
| 2592 | XRRA1       | -1.02 | 3.14E-01 | 5.85E-01 | 913.60   | not significant |
| 2593 | CAAP1       | -1.02 | 2.85E-01 | 5.55E-01 | 1604.82  | not significant |
| 2594 | C11orf58    | -1.02 | 2.64E-01 | 5.35E-01 | 5897.52  | not significant |
| 2595 | 43717_21856 | -1.02 | 2.05E-01 | 4.70E-01 | 41632.66 | not significant |
| 2596 | UBE2E2      | -1.02 | 3.07E-01 | 5.78E-01 | 650.81   | not significant |
| 2597 | NEXN        | -1.02 | 3.10E-01 | 5.81E-01 | 1794.56  | not significant |
| 2598 | ZRANB2      | -1.02 | 2.23E-01 | 4.90E-01 | 6086.96  | not significant |
| 2599 | ADMS        | -1.02 | 2.51E-01 | 5.19E-01 | 257.99   | not significant |
| 2600 | POR         | -1.02 | 3.07E-01 | 5.78E-01 | 561.44   | not significant |
| 2601 | CSNK1G3     | -1.02 | 2.87E-01 | 5.58E-01 | 419.25   | not significant |
| 2602 | SNUPN       | -1.02 | 3.13E-01 | 5.85E-01 | 1213.63  | not significant |
| 2603 | CNNM4       | -1.02 | 3.16E-01 | 5.86E-01 | 925.69   | not significant |
| 2604 | AAGAB       | -1.02 | 2.81E-01 | 5.51E-01 | 2731.73  | not significant |
| 2605 | KIF22       | -1.02 | 2.40E-01 | 5.08E-01 | 5594.20  | not significant |
| 2606 | CCDC176     | -1.02 | 1.48E-01 | 3.94E-01 | 115.99   | not significant |
| 2607 | RPP40       | -1.02 | 2.73E-01 | 5.43E-01 | 336.80   | not significant |
| 2608 | CBWD2       | -1.02 | 3.10E-01 | 5.81E-01 | 578.06   | not significant |
| 2609 | FAM118B     | -1.02 | 3.15E-01 | 5.86E-01 | 810.36   | not significant |
| 2610 | RNF121      | -1.02 | 3.24E-01 | 5.93E-01 | 661.30   | not significant |
| 2611 | NFIX        | -1.02 | 3.16E-01 | 5.86E-01 | 843.99   | not significant |
| 2612 | INIP        | -1.02 | 3.16E-01 | 5.86E-01 | 984.89   | not significant |
| 2613 | SMURF2      | -1.02 | 3.16E-01 | 5.86E-01 | 1023.82  | not significant |
| 2614 | GTF2E2      | -1.02 | 2.90E-01 | 5.62E-01 | 2306.59  | not significant |
| 2615 | CSRNP2      | -1.02 | 2.92E-01 | 5.64E-01 | 2132.83  | not significant |
| 2616 | ATP6V1C1    | -1.02 | 2.60E-01 | 5.30E-01 | 3436.91  | not significant |
| 2617 | IRF8        | -1.02 | 1.20E-01 | NA       | 94.49    | not significant |
| 2618 | LYPLAL1     | -1.02 | 2.22E-01 | 4.89E-01 | 212.20   | not significant |
| 2619 | COPRS       | -1.02 | 3.09E-01 | 5.80E-01 | 882.98   | not significant |
| 2620 | RNF25       | -1.02 | 3.14E-01 | 5.85E-01 | 609.32   | not significant |
| 2621 | LINC01128   | -1.02 | 3.03E-01 | 5.75E-01 | 494.84   | not significant |
| 2622 | MIR646HG    | -1.02 | 3.23E-01 | 5.93E-01 | 792.49   | not significant |
| 2623 | MGME1       | -1.02 | 3.06E-01 | 5.78E-01 | 1234.77  | not significant |
| 2624 | ING5        | -1.02 | 2.92E-01 | 5.64E-01 | 2255.54  | not significant |
| 2625 | NIPBL       | -1.02 | 2.97E-01 | 5.67E-01 | 5602.02  | not significant |
| 2626 | MAP4K4      | -1.02 | 2.54E-01 | 5.22E-01 | 8789.87  | not significant |
| 2627 | NPLOC4      | -1.02 | 2.08E-01 | 4.73E-01 | 9318.42  | not significant |

|      |              |       |          |          |          |                 |
|------|--------------|-------|----------|----------|----------|-----------------|
| 2628 | C19orf40     | -1.02 | 3.00E-01 | 5.70E-01 | 290.91   | not significant |
| 2629 | SDF2L1       | -1.02 | 3.25E-01 | 5.94E-01 | 1143.04  | not significant |
| 2630 | PGS1         | -1.02 | 3.02E-01 | 5.73E-01 | 1341.33  | not significant |
| 2631 | ZNF710       | -1.02 | 3.22E-01 | 5.91E-01 | 913.60   | not significant |
| 2632 | CHCHD4       | -1.02 | 3.20E-01 | 5.89E-01 | 956.08   | not significant |
| 2633 | UBE2D1       | -1.02 | 3.20E-01 | 5.89E-01 | 870.94   | not significant |
| 2634 | RALGAPA2     | -1.02 | 3.18E-01 | 5.88E-01 | 1125.64  | not significant |
| 2635 | PFKM         | -1.02 | 2.93E-01 | 5.64E-01 | 2215.30  | not significant |
| 2636 | AGO1         | -1.02 | 3.00E-01 | 5.71E-01 | 2677.93  | not significant |
| 2637 | PPHLN1       | -1.02 | 2.46E-01 | 5.14E-01 | 3948.58  | not significant |
| 2638 | SNRNP200     | -1.02 | 2.39E-01 | 5.07E-01 | 19884.71 | not significant |
| 2639 | COPA         | -1.02 | 2.40E-01 | 5.08E-01 | 7590.02  | not significant |
| 2640 | DYNLL1-AS1   | -1.02 | 1.28E-01 | 3.59E-01 | 111.20   | not significant |
| 2641 | LRSAM1       | -1.02 | 2.50E-01 | 5.19E-01 | 587.80   | not significant |
| 2642 | DCPS         | -1.02 | 3.24E-01 | 5.93E-01 | 847.92   | not significant |
| 2643 | DUSP6        | -1.02 | 1.72E-01 | 4.26E-01 | 13961.74 | not significant |
| 2644 | SNHG4        | -1.02 | 2.42E-01 | 5.10E-01 | 250.24   | not significant |
| 2645 | SLC25A33     | -1.02 | 2.69E-01 | 5.40E-01 | 370.59   | not significant |
| 2646 | VPS37A       | -1.02 | 3.18E-01 | 5.87E-01 | 1729.30  | not significant |
| 2647 | MCM10        | -1.02 | 2.34E-01 | 5.01E-01 | 4682.78  | not significant |
| 2648 | BRCC3        | -1.02 | 2.39E-01 | 5.08E-01 | 237.36   | not significant |
| 2649 | SRP19        | -1.02 | 3.10E-01 | 5.81E-01 | 1838.24  | not significant |
| 2650 | SART1        | -1.02 | 2.76E-01 | 5.47E-01 | 3953.60  | not significant |
| 2651 | RAPGEF6      | -1.02 | 3.12E-01 | 5.84E-01 | 2197.21  | not significant |
| 2652 | BCL7C        | -1.02 | 3.19E-01 | 5.88E-01 | 837.77   | not significant |
| 2653 | NDUFS4       | -1.02 | 3.25E-01 | 5.93E-01 | 884.29   | not significant |
| 2654 | NTSR1        | -1.02 | 3.31E-01 | 5.99E-01 | 551.67   | not significant |
| 2655 | CWC27        | -1.02 | 3.15E-01 | 5.86E-01 | 1961.98  | not significant |
| 2656 | KLHL15       | -1.02 | 3.23E-01 | 5.93E-01 | 1097.06  | not significant |
| 2657 | C2CD3        | -1.02 | 3.17E-01 | 5.87E-01 | 2111.79  | not significant |
| 2658 | CHCHD3       | -1.02 | 2.74E-01 | 5.44E-01 | 5500.24  | not significant |
| 2659 | P2RY11       | -1.02 | 1.43E-01 | 3.86E-01 | 105.96   | not significant |
| 2660 | TRAF1        | -1.02 | 2.31E-01 | 4.99E-01 | 206.09   | not significant |
| 2661 | ANKRD17      | -1.02 | 3.05E-01 | 5.77E-01 | 6026.37  | not significant |
| 2662 | FOXP1        | -1.02 | 3.27E-01 | 5.95E-01 | 1019.78  | not significant |
| 2663 | TXNDC11      | -1.02 | 3.10E-01 | 5.81E-01 | 1344.07  | not significant |
| 2664 | SEC22C       | -1.02 | 3.10E-01 | 5.81E-01 | 1914.97  | not significant |
| 2665 | LOC100507424 | -1.02 | 4.84E-02 | NA       | 54.68    | not significant |
| 2666 | ZNF490       | -1.02 | 2.69E-01 | 5.39E-01 | 289.85   | not significant |
| 2667 | ASB7         | -1.02 | 3.28E-01 | 5.96E-01 | 732.13   | not significant |
| 2668 | TXNL4B       | -1.02 | 3.17E-01 | 5.86E-01 | 1480.41  | not significant |
| 2669 | WRNIP1       | -1.02 | 2.98E-01 | 5.68E-01 | 3042.25  | not significant |
| 2670 | PLRG1        | -1.02 | 2.88E-01 | 5.59E-01 | 2501.28  | not significant |
| 2671 | QRICH1       | -1.02 | 2.58E-01 | 5.26E-01 | 4224.37  | not significant |
| 2672 | ITGB2        | -1.02 | 2.69E-01 | 5.40E-01 | 4033.60  | not significant |
| 2673 | FAM86C2P     | -1.02 | 1.44E-01 | 3.87E-01 | 110.28   | not significant |
| 2674 | CLPB         | -1.02 | 3.29E-01 | 5.97E-01 | 1177.07  | not significant |
| 2675 | ACAA2        | -1.02 | 3.23E-01 | 5.93E-01 | 2985.96  | not significant |
| 2676 | GCN1L1       | -1.02 | 2.74E-01 | 5.44E-01 | 10887.76 | not significant |
| 2677 | NR6A1        | -1.02 | 1.15E-01 | NA       | 87.32    | not significant |
| 2678 | ARL4A        | -1.02 | 2.48E-01 | 5.16E-01 | 238.91   | not significant |
| 2679 | PTPRU        | -1.02 | 3.07E-01 | 5.78E-01 | 400.15   | not significant |
| 2680 | NAA10        | -1.02 | 3.26E-01 | 5.95E-01 | 1668.05  | not significant |
| 2681 | ABCC4        | -1.02 | 3.31E-01 | 5.99E-01 | 1489.93  | not significant |
| 2682 | HEBP2        | -1.02 | 2.34E-01 | 5.01E-01 | 218.07   | not significant |
| 2683 | SH2D2A       | -1.02 | 2.96E-01 | 5.67E-01 | 354.99   | not significant |
| 2684 | MRPL21       | -1.02 | 3.16E-01 | 5.86E-01 | 1163.15  | not significant |
| 2685 | TOMM5        | -1.02 | 3.11E-01 | 5.82E-01 | 4750.79  | not significant |
| 2686 | NCK1         | -1.02 | 3.38E-01 | 6.06E-01 | 1509.02  | not significant |
| 2687 | TPP2         | -1.02 | 2.94E-01 | 5.65E-01 | 4029.42  | not significant |
| 2688 | CCDC124      | -1.02 | 3.18E-01 | 5.88E-01 | 3476.88  | not significant |
| 2689 | STRA13       | -1.02 | 3.17E-01 | 5.86E-01 | 3845.57  | not significant |
| 2690 | RALGDS       | -1.02 | 3.16E-01 | 5.86E-01 | 2024.96  | not significant |
| 2691 | FKBP5        | -1.02 | 2.69E-01 | 5.40E-01 | 5206.64  | not significant |
| 2692 | CIDECP       | -1.02 | 2.09E-01 | 4.73E-01 | 200.64   | not significant |
| 2693 | LZTS2        | -1.02 | 3.15E-01 | 5.86E-01 | 421.65   | not significant |
| 2694 | THAP7        | -1.02 | 3.36E-01 | 6.04E-01 | 1099.81  | not significant |
| 2695 | MREG         | -1.02 | 3.36E-01 | 6.04E-01 | 719.80   | not significant |
| 2696 | DCTN6        | -1.02 | 3.35E-01 | 6.04E-01 | 717.88   | not significant |
| 2697 | PDXK         | -1.02 | 3.37E-01 | 6.05E-01 | 1072.24  | not significant |
| 2698 | KRIT1        | -1.02 | 3.21E-01 | 5.91E-01 | 2002.47  | not significant |
| 2699 | ERH          | -1.02 | 2.76E-01 | 5.47E-01 | 8599.18  | not significant |
| 2700 | TXLNA        | -1.02 | 2.54E-01 | 5.23E-01 | 5899.28  | not significant |
| 2701 | LIMK1        | -1.02 | 2.96E-01 | 5.67E-01 | 358.25   | not significant |
| 2702 | SRR          | -1.02 | 3.06E-01 | 5.78E-01 | 399.13   | not significant |
| 2703 | PDZD11       | -1.02 | 3.38E-01 | 6.06E-01 | 1025.40  | not significant |
| 2704 | ASTE1        | -1.02 | 3.28E-01 | 5.96E-01 | 568.98   | not significant |
| 2705 | HAT1         | -1.02 | 2.69E-01 | 5.39E-01 | 3685.94  | not significant |
| 2706 | SRSF4        | -1.02 | 2.34E-01 | 5.01E-01 | 7095.32  | not significant |
| 2707 | POM121       | -1.02 | 2.44E-01 | 5.12E-01 | 1079.49  | not significant |
| 2708 | SMIM24       | -1.02 | 3.35E-01 | 6.04E-01 | 1081.79  | not significant |
| 2709 | PARG         | -1.02 | 3.39E-01 | 6.06E-01 | 817.26   | not significant |
| 2710 | PARD3        | -1.02 | 3.18E-01 | 5.87E-01 | 2195.21  | not significant |
| 2711 | ZNF12        | -1.02 | 3.30E-01 | 5.98E-01 | 1639.76  | not significant |
| 2712 | OAS3         | -1.02 | 2.62E-01 | 5.32E-01 | 7344.92  | not significant |
| 2713 | ROCK1        | -1.02 | 3.70E-01 | 6.35E-01 | 5897.16  | not significant |
| 2714 | CDK11A       | -1.02 | 3.05E-01 | 5.77E-01 | 363.30   | not significant |
| 2715 | SPATA5L1     | -1.02 | 3.10E-01 | 5.81E-01 | 385.73   | not significant |

|      |              |       |          |          |          |                 |
|------|--------------|-------|----------|----------|----------|-----------------|
| 2716 | KIF18A       | -1.02 | 3.39E-01 | 6.07E-01 | 1020.09  | not significant |
| 2717 | TMEM39B      | -1.02 | 3.36E-01 | 6.04E-01 | 1279.44  | not significant |
| 2718 | PSMB7        | -1.02 | 3.01E-01 | 5.71E-01 | 3049.07  | not significant |
| 2719 | DHX8         | -1.02 | 3.27E-01 | 5.95E-01 | 2194.07  | not significant |
| 2720 | ARHGAP15     | -1.02 | 3.08E-01 | 5.80E-01 | 3081.32  | not significant |
| 2721 | SETD3        | -1.02 | 3.21E-01 | 5.90E-01 | 2812.83  | not significant |
| 2722 | YTHDF2       | -1.02 | 2.70E-01 | 5.41E-01 | 4023.46  | not significant |
| 2723 | RDH13        | -1.02 | 1.40E-01 | 3.81E-01 | 111.71   | not significant |
| 2724 | MORN2        | -1.02 | 1.09E-01 | NA       | 86.27    | not significant |
| 2725 | ZNF417       | -1.02 | 3.32E-01 | 5.99E-01 | 580.59   | not significant |
| 2726 | SNAP23       | -1.02 | 3.27E-01 | 5.95E-01 | 1572.14  | not significant |
| 2727 | UVRAG        | -1.02 | 3.37E-01 | 6.05E-01 | 1252.48  | not significant |
| 2728 | RNF14        | -1.02 | 3.47E-01 | 6.13E-01 | 1812.44  | not significant |
| 2729 | ZNF107       | -1.02 | 3.16E-01 | 5.86E-01 | 4464.86  | not significant |
| 2730 | SSH2         | -1.02 | 3.21E-01 | 5.91E-01 | 3001.93  | not significant |
| 2731 | SSR4P1       | -1.02 | 6.43E-02 | NA       | 59.49    | not significant |
| 2732 | PIWIL3       | -1.02 | 1.46E-01 | 3.90E-01 | 115.42   | not significant |
| 2733 | ATG4B        | -1.02 | 3.17E-01 | 5.87E-01 | 2562.27  | not significant |
| 2734 | DMXL1        | -1.02 | 3.29E-01 | 5.97E-01 | 2085.51  | not significant |
| 2735 | NAA30        | -1.02 | 3.70E-01 | 6.34E-01 | 1532.72  | not significant |
| 2736 | ANXA6        | -1.02 | 2.17E-01 | 4.83E-01 | 9922.13  | not significant |
| 2737 | WAC          | -1.02 | 2.59E-01 | 5.28E-01 | 7858.09  | not significant |
| 2738 | TEX9         | -1.02 | 9.90E-02 | NA       | 73.66    | not significant |
| 2739 | ATP5G3       | -1.02 | 3.35E-01 | 6.04E-01 | 8566.20  | not significant |
| 2740 | U2AF1        | -1.02 | 3.08E-01 | 5.79E-01 | 3516.02  | not significant |
| 2741 | PREP         | -1.02 | 3.14E-01 | 5.85E-01 | 2759.63  | not significant |
| 2742 | FPGT         | -1.02 | 2.95E-01 | 5.66E-01 | 307.46   | not significant |
| 2743 | SKIL         | -1.02 | 3.35E-01 | 6.04E-01 | 547.05   | not significant |
| 2744 | KDM1B        | -1.02 | 3.39E-01 | 6.07E-01 | 593.19   | not significant |
| 2745 | MAN1A2       | -1.02 | 3.38E-01 | 6.06E-01 | 1569.90  | not significant |
| 2746 | FAM20B       | -1.02 | 2.98E-01 | 5.69E-01 | 2571.30  | not significant |
| 2747 | LIMS1        | -1.02 | 3.30E-01 | 5.97E-01 | 2121.81  | not significant |
| 2748 | TMEM104      | -1.02 | 3.39E-01 | 6.07E-01 | 1663.83  | not significant |
| 2749 | NDUFAF2      | -1.02 | 3.30E-01 | 5.97E-01 | 470.81   | not significant |
| 2750 | ECHS1        | -1.02 | 3.42E-01 | 6.09E-01 | 2083.57  | not significant |
| 2751 | ADAT2        | -1.02 | 3.48E-01 | 6.15E-01 | 871.45   | not significant |
| 2752 | PAPD7        | -1.02 | 3.45E-01 | 6.11E-01 | 1509.47  | not significant |
| 2753 | STK35        | -1.02 | 3.39E-01 | 6.07E-01 | 2336.47  | not significant |
| 2754 | HJURP        | -1.02 | 3.27E-01 | 5.96E-01 | 3015.23  | not significant |
| 2755 | TMX2         | -1.02 | 2.97E-01 | 5.68E-01 | 2924.03  | not significant |
| 2756 | NBN          | -1.02 | 2.71E-01 | 5.41E-01 | 4137.06  | not significant |
| 2757 | WASF2        | -1.02 | 2.73E-01 | 5.43E-01 | 6997.16  | not significant |
| 2758 | FAM216A      | -1.02 | 3.51E-01 | 6.18E-01 | 949.67   | not significant |
| 2759 | UBE2J2       | -1.02 | 3.24E-01 | 5.93E-01 | 2828.59  | not significant |
| 2760 | CEP78        | -1.02 | 3.34E-01 | 6.03E-01 | 1588.27  | not significant |
| 2761 | DIP2B        | -1.02 | 3.25E-01 | 5.94E-01 | 3777.03  | not significant |
| 2762 | CDK5RAP2     | -1.02 | 3.37E-01 | 6.05E-01 | 2078.62  | not significant |
| 2763 | DFFA         | -1.02 | 3.22E-01 | 5.92E-01 | 2416.82  | not significant |
| 2764 | FAM178A      | -1.02 | 3.05E-01 | 5.77E-01 | 3852.03  | not significant |
| 2765 | CDK1         | -1.02 | 2.54E-01 | 5.23E-01 | 5460.39  | not significant |
| 2766 | ZNF235       | -1.02 | 2.07E-01 | 4.71E-01 | 212.42   | not significant |
| 2767 | IRAK1BP1     | -1.02 | 3.16E-01 | 5.86E-01 | 358.63   | not significant |
| 2768 | ZNF670       | -1.02 | 3.01E-01 | 5.71E-01 | 331.83   | not significant |
| 2769 | NTHL1        | -1.02 | 3.53E-01 | 6.19E-01 | 913.74   | not significant |
| 2770 | SPOP         | -1.02 | 3.32E-01 | 6.00E-01 | 2081.47  | not significant |
| 2771 | GMPS         | -1.02 | 2.92E-01 | 5.63E-01 | 3691.22  | not significant |
| 2772 | TMEM33       | -1.02 | 2.88E-01 | 5.59E-01 | 4813.60  | not significant |
| 2773 | BRMS1L       | -1.02 | 3.21E-01 | 5.91E-01 | 389.87   | not significant |
| 2774 | CCDC51       | -1.02 | 3.29E-01 | 5.97E-01 | 528.09   | not significant |
| 2775 | UBE2G2       | -1.02 | 3.26E-01 | 5.94E-01 | 440.30   | not significant |
| 2776 | METTL4       | -1.02 | 3.53E-01 | 6.19E-01 | 880.24   | not significant |
| 2777 | MRPL18       | -1.02 | 3.52E-01 | 6.19E-01 | 2030.24  | not significant |
| 2778 | OA2Z         | -1.02 | 3.50E-01 | 6.17E-01 | 1270.98  | not significant |
| 2779 | PRKAR2B      | -1.02 | 3.54E-01 | 6.19E-01 | 1061.70  | not significant |
| 2780 | FLVCR1       | -1.02 | 3.52E-01 | 6.19E-01 | 985.26   | not significant |
| 2781 | RHOG         | -1.02 | 3.14E-01 | 5.85E-01 | 3672.38  | not significant |
| 2782 | SEC13        | -1.02 | 3.04E-01 | 5.76E-01 | 4147.94  | not significant |
| 2783 | PLEKHA2      | -1.02 | 2.42E-01 | 5.10E-01 | 7000.38  | not significant |
| 2784 | LRPPRC       | -1.02 | 2.10E-01 | 4.74E-01 | 12913.07 | not significant |
| 2785 | LOC100131691 | -1.02 | 1.27E-01 | NA       | 88.55    | not significant |
| 2786 | FBXO30       | -1.02 | 3.55E-01 | 6.21E-01 | 920.35   | not significant |
| 2787 | UQCRH        | -1.02 | 3.28E-01 | 5.96E-01 | 4935.57  | not significant |
| 2788 | PARVG        | -1.02 | 3.26E-01 | 5.94E-01 | 3022.33  | not significant |
| 2789 | TMEM68       | -1.02 | 3.53E-01 | 6.19E-01 | 1261.27  | not significant |
| 2790 | SS18         | -1.02 | 3.17E-01 | 5.87E-01 | 2803.86  | not significant |
| 2791 | RAB7A        | -1.02 | 2.72E-01 | 5.43E-01 | 7630.71  | not significant |
| 2792 | PCM1         | -1.02 | 2.71E-01 | 5.42E-01 | 8271.20  | not significant |
| 2793 | MTSS1        | -1.02 | 1.50E-01 | NA       | 94.57    | not significant |
| 2794 | GAN          | -1.02 | 2.37E-01 | 5.04E-01 | 221.62   | not significant |
| 2795 | NKIRAS1      | -1.02 | 2.09E-01 | 4.74E-01 | 150.35   | not significant |
| 2796 | NAT1         | -1.02 | 3.32E-01 | 6.00E-01 | 416.01   | not significant |
| 2797 | GALNT6       | -1.02 | 3.42E-01 | 6.09E-01 | 2097.55  | not significant |
| 2798 | GPS1         | -1.02 | 2.88E-01 | 5.59E-01 | 6693.01  | not significant |
| 2799 | GLMN         | -1.02 | 3.50E-01 | 6.17E-01 | 582.98   | not significant |
| 2800 | TTC5         | -1.02 | 3.68E-01 | 6.33E-01 | 743.79   | not significant |
| 2801 | MRPL23       | -1.02 | 3.53E-01 | 6.19E-01 | 2442.49  | not significant |
| 2802 | TXNL4A       | -1.02 | 3.39E-01 | 6.06E-01 | 3794.42  | not significant |
| 2803 | SNF8         | -1.02 | 3.48E-01 | 6.15E-01 | 2377.53  | not significant |

|      |            |       |          |          |          |                 |
|------|------------|-------|----------|----------|----------|-----------------|
| 2804 | MCM4       | -1.02 | 2.00E-01 | 4.64E-01 | 28517.12 | not significant |
| 2805 | CD80       | -1.02 | 9.74E-02 | NA       | 67.48    | not significant |
| 2806 | APOO       | -1.02 | 3.57E-01 | 6.22E-01 | 665.22   | not significant |
| 2807 | DCTN4      | -1.02 | 3.42E-01 | 6.09E-01 | 1808.08  | not significant |
| 2808 | RTCB       | -1.02 | 3.16E-01 | 5.86E-01 | 3359.44  | not significant |
| 2809 | PDPK1      | -1.02 | 3.51E-01 | 6.18E-01 | 1991.80  | not significant |
| 2810 | GOLGA3     | -1.02 | 2.50E-01 | 5.18E-01 | 8362.35  | not significant |
| 2811 | ARL10      | -1.02 | 1.84E-01 | 4.42E-01 | 137.97   | not significant |
| 2812 | LINC00944  | -1.02 | 2.09E-01 | 4.74E-01 | 149.79   | not significant |
| 2813 | NF1        | -1.02 | 3.47E-01 | 6.14E-01 | 4429.42  | not significant |
| 2814 | CEP89      | -1.02 | 3.20E-01 | 5.89E-01 | 349.96   | not significant |
| 2815 | ARMC5      | -1.02 | 3.59E-01 | 6.25E-01 | 793.83   | not significant |
| 2816 | TAF1       | -1.02 | 3.50E-01 | 6.17E-01 | 2132.71  | not significant |
| 2817 | GSR        | -1.02 | 2.76E-01 | 5.47E-01 | 5531.64  | not significant |
| 2818 | ATP6V1E2   | -1.02 | 2.16E-01 | 4.82E-01 | 143.46   | not significant |
| 2819 | FAM63B     | -1.02 | 2.84E-01 | 5.55E-01 | 272.33   | not significant |
| 2820 | AUNIP      | -1.02 | 3.36E-01 | 6.04E-01 | 412.24   | not significant |
| 2821 | RBM42      | -1.02 | 3.51E-01 | 6.18E-01 | 2836.89  | not significant |
| 2822 | CD320      | -1.02 | 3.40E-01 | 6.08E-01 | 2609.39  | not significant |
| 2823 | SNRPD1     | -1.02 | 3.27E-01 | 5.95E-01 | 4319.04  | not significant |
| 2824 | SIAH2      | -1.02 | 3.44E-01 | 6.10E-01 | 2342.93  | not significant |
| 2825 | AAMDC      | -1.02 | 1.87E-01 | 4.45E-01 | 120.70   | not significant |
| 2826 | OTUD5      | -1.02 | 3.53E-01 | 6.19E-01 | 556.22   | not significant |
| 2827 | KLHL12     | -1.02 | 3.49E-01 | 6.15E-01 | 1426.48  | not significant |
| 2828 | FOPNL      | -1.02 | 3.08E-01 | 5.80E-01 | 3307.16  | not significant |
| 2829 | ERBB2IP    | -1.02 | 3.32E-01 | 6.00E-01 | 5293.50  | not significant |
| 2830 | HNRNPL     | -1.02 | 2.55E-01 | 5.24E-01 | 16718.41 | not significant |
| 2831 | PLCG1-AS1  | -1.02 | 4.20E-02 | NA       | 49.64    | not significant |
| 2832 | RAB12      | -1.02 | 3.57E-01 | 6.23E-01 | 537.67   | not significant |
| 2833 | ATF1       | -1.02 | 3.67E-01 | 6.32E-01 | 1737.57  | not significant |
| 2834 | CUL1       | -1.02 | 3.13E-01 | 5.84E-01 | 3722.15  | not significant |
| 2835 | C17orf96   | -1.02 | 3.07E-01 | 5.79E-01 | 447.99   | not significant |
| 2836 | C12orf65   | -1.02 | 3.68E-01 | 6.32E-01 | 1032.83  | not significant |
| 2837 | CCDC138    | -1.02 | 3.69E-01 | 6.33E-01 | 934.67   | not significant |
| 2838 | SLC25A22   | -1.02 | 3.55E-01 | 6.21E-01 | 1861.49  | not significant |
| 2839 | ASAP1      | -1.02 | 3.65E-01 | 6.30E-01 | 1860.17  | not significant |
| 2840 | MDH2       | -1.02 | 3.25E-01 | 5.94E-01 | 4853.39  | not significant |
| 2841 | XIAP       | -1.02 | 3.49E-01 | 6.16E-01 | 2503.76  | not significant |
| 2842 | HMGB1      | -1.02 | 2.51E-01 | 5.19E-01 | 13669.09 | not significant |
| 2843 | KIAA1024   | -1.02 | 1.44E-01 | NA       | 92.53    | not significant |
| 2844 | CLP1       | -1.02 | 3.57E-01 | 6.22E-01 | 544.70   | not significant |
| 2845 | HINT3      | -1.02 | 3.70E-01 | 6.35E-01 | 681.03   | not significant |
| 2846 | MRPL48     | -1.02 | 3.67E-01 | 6.31E-01 | 1766.01  | not significant |
| 2847 | NDUFA9     | -1.02 | 3.30E-01 | 5.98E-01 | 3625.30  | not significant |
| 2848 | PEF1       | -1.02 | 3.42E-01 | 6.09E-01 | 2487.93  | not significant |
| 2849 | SETX       | -1.02 | 3.40E-01 | 6.07E-01 | 4355.00  | not significant |
| 2850 | ADRBK2     | -1.02 | 2.95E-01 | 5.66E-01 | 15292.86 | not significant |
| 2851 | CCDC84     | -1.02 | 2.96E-01 | 5.67E-01 | 258.82   | not significant |
| 2852 | ZNF586     | -1.02 | 3.58E-01 | 6.23E-01 | 527.71   | not significant |
| 2853 | POLR3K     | -1.02 | 3.66E-01 | 6.30E-01 | 1443.77  | not significant |
| 2854 | DCUN1D5    | -1.02 | 3.72E-01 | 6.37E-01 | 1838.00  | not significant |
| 2855 | ARHGAP26   | -1.02 | 3.54E-01 | 6.19E-01 | 1420.77  | not significant |
| 2856 | CCNC       | -1.02 | 3.24E-01 | 5.93E-01 | 3889.94  | not significant |
| 2857 | UBE2O      | -1.02 | 3.35E-01 | 6.04E-01 | 3544.49  | not significant |
| 2858 | FGF11      | -1.02 | 9.63E-02 | NA       | 63.26    | not significant |
| 2859 | ACTR3B     | -1.02 | 2.84E-01 | 5.54E-01 | 244.40   | not significant |
| 2860 | SLC25A37   | -1.02 | 3.41E-01 | 6.08E-01 | 377.51   | not significant |
| 2861 | DGUOK      | -1.02 | 3.64E-01 | 6.28E-01 | 1982.71  | not significant |
| 2862 | CUTC       | -1.02 | 3.73E-01 | 6.38E-01 | 863.04   | not significant |
| 2863 | ZBTB40     | -1.02 | 3.72E-01 | 6.37E-01 | 2648.13  | not significant |
| 2864 | SCFD1      | -1.02 | 4.03E-01 | 6.62E-01 | 1519.27  | not significant |
| 2865 | ADSL       | -1.02 | 3.15E-01 | 5.86E-01 | 4983.28  | not significant |
| 2866 | ZAK        | -1.02 | 3.51E-01 | 6.18E-01 | 2287.97  | not significant |
| 2867 | SSBP3      | -1.02 | 3.37E-01 | 6.05E-01 | 5908.72  | not significant |
| 2868 | CDC25A     | -1.02 | 2.86E-01 | 5.57E-01 | 4927.86  | not significant |
| 2869 | MLLT1      | -1.02 | 2.98E-01 | 5.68E-01 | 4894.57  | not significant |
| 2870 | E2F3       | -1.02 | 3.06E-01 | 5.78E-01 | 3855.36  | not significant |
| 2871 | TMEM99     | -1.02 | 2.85E-01 | 5.55E-01 | 234.13   | not significant |
| 2872 | THAP3      | -1.02 | 3.21E-01 | 5.91E-01 | 530.70   | not significant |
| 2873 | SLC36A1    | -1.02 | 3.53E-01 | 6.19E-01 | 479.27   | not significant |
| 2874 | SAMM50     | -1.02 | 3.65E-01 | 6.29E-01 | 2225.45  | not significant |
| 2875 | RAD18      | -1.02 | 3.60E-01 | 6.25E-01 | 2232.88  | not significant |
| 2876 | ANTXR1     | -1.02 | 3.75E-01 | 6.39E-01 | 2521.52  | not significant |
| 2877 | GSK3A      | -1.02 | 3.42E-01 | 6.08E-01 | 3318.76  | not significant |
| 2878 | SUCLG1     | -1.02 | 3.41E-01 | 6.08E-01 | 3266.87  | not significant |
| 2879 | CEBPZ      | -1.02 | 3.41E-01 | 6.08E-01 | 3006.15  | not significant |
| 2880 | SCYL2      | -1.02 | 3.41E-01 | 6.08E-01 | 3256.10  | not significant |
| 2881 | ATP1A1-AS1 | -1.02 | 1.56E-01 | 4.04E-01 | 115.40   | not significant |
| 2882 | STARD7-AS1 | -1.02 | 2.24E-01 | 4.91E-01 | 145.99   | not significant |
| 2883 | CETN3      | -1.02 | 3.78E-01 | 6.43E-01 | 857.04   | not significant |
| 2884 | UBL3       | -1.02 | 3.78E-01 | 6.43E-01 | 886.70   | not significant |
| 2885 | NACA       | -1.02 | 3.26E-01 | 5.94E-01 | 21863.78 | not significant |
| 2886 | BAZ2A      | -1.02 | 3.58E-01 | 6.23E-01 | 4719.11  | not significant |
| 2887 | NAA25      | -1.02 | 3.46E-01 | 6.12E-01 | 2891.25  | not significant |
| 2888 | VPS9D1     | -1.02 | 1.42E-01 | NA       | 86.01    | not significant |
| 2889 | CD27       | -1.02 | 2.04E-01 | 4.69E-01 | 113.13   | not significant |
| 2890 | JADE3      | -1.02 | 2.48E-01 | 5.15E-01 | 173.47   | not significant |
| 2891 | CEP112     | -1.02 | 3.07E-01 | 5.79E-01 | 262.39   | not significant |

|      |           |       |          |          |          |                 |
|------|-----------|-------|----------|----------|----------|-----------------|
| 2892 | SLC25A13  | -1.02 | 3.70E-01 | 6.35E-01 | 574.84   | not significant |
| 2893 | RNF19B    | -1.02 | 3.92E-01 | 6.53E-01 | 736.51   | not significant |
| 2894 | DDX20     | -1.02 | 3.63E-01 | 6.27E-01 | 1785.54  | not significant |
| 2895 | ERI1      | -1.02 | 3.50E-01 | 6.17E-01 | 2524.42  | not significant |
| 2896 | MSH2      | -1.02 | 2.82E-01 | 5.52E-01 | 6867.11  | not significant |
| 2897 | SF3A1     | -1.02 | 2.59E-01 | 5.28E-01 | 8770.02  | not significant |
| 2898 | EXOSC8    | -1.02 | 3.66E-01 | 6.30E-01 | 2050.57  | not significant |
| 2899 | ATF7      | -1.02 | 3.80E-01 | 6.44E-01 | 1595.80  | not significant |
| 2900 | NDC1      | -1.02 | 3.40E-01 | 6.08E-01 | 4307.44  | not significant |
| 2901 | NAP1L4    | -1.02 | 2.98E-01 | 5.68E-01 | 8676.93  | not significant |
| 2902 | TAOK3     | -1.02 | 3.07E-01 | 5.78E-01 | 4550.78  | not significant |
| 2903 | MTERF1    | -1.02 | 3.54E-01 | 6.20E-01 | 423.91   | not significant |
| 2904 | CHCHD7    | -1.02 | 3.80E-01 | 6.44E-01 | 1261.68  | not significant |
| 2905 | ZNF407    | -1.02 | 3.81E-01 | 6.45E-01 | 880.40   | not significant |
| 2906 | UBE2Z     | -1.02 | 3.42E-01 | 6.09E-01 | 2591.82  | not significant |
| 2907 | SMAP2     | -1.02 | 3.37E-01 | 6.05E-01 | 2728.57  | not significant |
| 2908 | CAND1     | -1.02 | 3.00E-01 | 5.70E-01 | 11095.53 | not significant |
| 2909 | MAPK8     | -1.02 | 3.48E-01 | 6.15E-01 | 4930.08  | not significant |
| 2910 | CCDC102A  | -1.02 | 3.77E-01 | 6.42E-01 | 400.80   | not significant |
| 2911 | BTBD7     | -1.02 | 3.83E-01 | 6.46E-01 | 905.86   | not significant |
| 2912 | SUCLA2    | -1.02 | 3.62E-01 | 6.27E-01 | 2120.38  | not significant |
| 2913 | SLC9A1    | -1.02 | 3.84E-01 | 6.46E-01 | 1215.53  | not significant |
| 2914 | STX6      | -1.02 | 3.56E-01 | 6.21E-01 | 2905.42  | not significant |
| 2915 | BCL2L1    | -1.02 | 2.68E-01 | 5.38E-01 | 8707.58  | not significant |
| 2916 | NUP62     | -1.02 | 2.64E-01 | 5.35E-01 | 7557.36  | not significant |
| 2917 | CSTF2T    | -1.02 | 3.30E-01 | 5.97E-01 | 2870.20  | not significant |
| 2918 | COL4A3BP  | -1.02 | 3.55E-01 | 6.21E-01 | 2368.81  | not significant |
| 2919 | CHST2     | -1.02 | 3.49E-01 | 6.16E-01 | 4550.88  | not significant |
| 2920 | PM20D2    | -1.02 | 3.31E-01 | 5.99E-01 | 3746.91  | not significant |
| 2921 | PSMA2     | -1.02 | 3.36E-01 | 6.04E-01 | 6641.18  | not significant |
| 2922 | SDHA      | -1.02 | 3.41E-01 | 6.08E-01 | 3728.30  | not significant |
| 2923 | FLNA      | -1.02 | 3.21E-01 | 5.91E-01 | 13415.94 | not significant |
| 2924 | THUMPD3   | -1.02 | 3.60E-01 | 6.25E-01 | 2753.66  | not significant |
| 2925 | EDC4      | -1.02 | 2.95E-01 | 5.66E-01 | 5479.89  | not significant |
| 2926 | TMPRSS3   | -1.02 | 1.48E-01 | NA       | 83.70    | not significant |
| 2927 | ZNF140    | -1.02 | 3.83E-01 | 6.46E-01 | 653.47   | not significant |
| 2928 | GPX1      | -1.02 | 3.83E-01 | 6.46E-01 | 2979.62  | not significant |
| 2929 | TRERF1    | -1.02 | 3.85E-01 | 6.47E-01 | 800.96   | not significant |
| 2930 | SHISA5    | -1.02 | 3.34E-01 | 6.03E-01 | 4240.95  | not significant |
| 2931 | CSPP1     | -1.02 | 3.81E-01 | 6.45E-01 | 1532.45  | not significant |
| 2932 | PGRMC2    | -1.02 | 3.51E-01 | 6.18E-01 | 2513.02  | not significant |
| 2933 | ZBTB24    | -1.02 | 4.19E-01 | 6.75E-01 | 1490.68  | not significant |
| 2934 | NCAPH     | -1.02 | 3.27E-01 | 5.95E-01 | 3929.37  | not significant |
| 2935 | DIS3      | -1.02 | 3.52E-01 | 6.19E-01 | 3307.83  | not significant |
| 2936 | PAK2      | -1.02 | 2.92E-01 | 5.64E-01 | 11435.67 | not significant |
| 2937 | ING2      | -1.02 | 3.32E-01 | 5.99E-01 | 532.57   | not significant |
| 2938 | VRK2      | -1.02 | 3.33E-01 | 6.00E-01 | 562.12   | not significant |
| 2939 | BAHD1     | -1.02 | 3.80E-01 | 6.44E-01 | 1502.03  | not significant |
| 2940 | NDUFA10   | -1.02 | 3.57E-01 | 6.23E-01 | 2528.51  | not significant |
| 2941 | LSM5      | -1.02 | 3.61E-01 | 6.26E-01 | 2883.25  | not significant |
| 2942 | CERS6     | -1.02 | 3.60E-01 | 6.25E-01 | 6092.90  | not significant |
| 2943 | ENOPH1    | -1.02 | 3.20E-01 | 5.89E-01 | 4156.12  | not significant |
| 2944 | CHCHD2    | -1.02 | 3.81E-01 | 6.45E-01 | 13171.30 | not significant |
| 2945 | BCAS2     | -1.02 | 3.82E-01 | 6.45E-01 | 1796.00  | not significant |
| 2946 | NIPA1     | -1.02 | 3.74E-01 | 6.39E-01 | 1421.58  | not significant |
| 2947 | ZNF507    | -1.02 | 3.85E-01 | 6.47E-01 | 2164.68  | not significant |
| 2948 | SETD7     | -1.02 | 3.86E-01 | 6.48E-01 | 1797.39  | not significant |
| 2949 | KIAA0196  | -1.02 | 3.64E-01 | 6.28E-01 | 2972.83  | not significant |
| 2950 | AP3B1     | -1.02 | 3.49E-01 | 6.16E-01 | 3585.93  | not significant |
| 2951 | LINC00341 | -1.02 | 2.01E-01 | 4.65E-01 | 117.50   | not significant |
| 2952 | OAS1      | -1.02 | 2.62E-01 | 5.32E-01 | 166.13   | not significant |
| 2953 | C10orf12  | -1.02 | 3.62E-01 | 6.26E-01 | 601.35   | not significant |
| 2954 | PRADC1    | -1.02 | 3.94E-01 | 6.54E-01 | 826.65   | not significant |
| 2955 | RNF141    | -1.02 | 3.91E-01 | 6.52E-01 | 716.02   | not significant |
| 2956 | PRPSAP2   | -1.02 | 3.74E-01 | 6.39E-01 | 1421.89  | not significant |
| 2957 | MRPS15    | -1.02 | 3.87E-01 | 6.48E-01 | 3487.22  | not significant |
| 2958 | TMEM70    | -1.02 | 3.84E-01 | 6.46E-01 | 2319.65  | not significant |
| 2959 | TSN       | -1.02 | 3.24E-01 | 5.93E-01 | 4641.28  | not significant |
| 2960 | PPP2R1B   | -1.02 | 3.56E-01 | 6.22E-01 | 2661.68  | not significant |
| 2961 | HNRNPUL1  | -1.02 | 2.78E-01 | 5.48E-01 | 18953.80 | not significant |
| 2962 | DENND6B   | -1.02 | 7.04E-02 | NA       | 45.81    | not significant |
| 2963 | MIPEPP3   | -1.02 | 1.54E-01 | NA       | 81.18    | not significant |
| 2964 | TEF       | -1.02 | 3.25E-01 | 5.93E-01 | 293.56   | not significant |
| 2965 | AHNAK     | -1.02 | 3.64E-01 | 6.28E-01 | 397.70   | not significant |
| 2966 | UBAC1     | -1.02 | 3.96E-01 | 6.55E-01 | 932.46   | not significant |
| 2967 | TULP3     | -1.02 | 3.94E-01 | 6.54E-01 | 696.84   | not significant |
| 2968 | SIRT2     | -1.02 | 3.92E-01 | 6.53E-01 | 1518.89  | not significant |
| 2969 | PLGRKT    | -1.02 | 2.94E-01 | 5.65E-01 | 438.39   | not significant |
| 2970 | TIGD5     | -1.02 | 3.44E-01 | 6.11E-01 | 367.71   | not significant |
| 2971 | PSMG1     | -1.02 | 3.87E-01 | 6.48E-01 | 1906.36  | not significant |
| 2972 | CHMP4B    | -1.02 | 3.56E-01 | 6.21E-01 | 5078.83  | not significant |
| 2973 | PRDM4     | -1.02 | 3.91E-01 | 6.52E-01 | 1746.39  | not significant |
| 2974 | M6PR      | -1.02 | 3.38E-01 | 6.06E-01 | 4915.05  | not significant |
| 2975 | CYB5R3    | -1.02 | 3.36E-01 | 6.04E-01 | 4284.60  | not significant |
| 2976 | SLC9A6    | -1.02 | 2.31E-01 | 4.99E-01 | 123.97   | not significant |
| 2977 | KLHL29    | -1.02 | 1.96E-01 | 4.59E-01 | 110.82   | not significant |
| 2978 | HELZ2     | -1.02 | 2.92E-01 | 5.64E-01 | 222.29   | not significant |
| 2979 | ELK1      | -1.02 | 3.86E-01 | 6.48E-01 | 2066.98  | not significant |

|      |              |       |          |          |          |                 |
|------|--------------|-------|----------|----------|----------|-----------------|
| 2980 | UPRT         | -1.02 | 3.98E-01 | 6.58E-01 | 1013.48  | not significant |
| 2981 | SIRT1        | -1.02 | 3.94E-01 | 6.54E-01 | 1315.91  | not significant |
| 2982 | SMEK1        | -1.02 | 3.31E-01 | 5.99E-01 | 6304.87  | not significant |
| 2983 | LRRC69       | -1.02 | 2.13E-02 | NA       | 27.38    | not significant |
| 2984 | IQCH         | -1.02 | 3.21E-02 | NA       | 34.70    | not significant |
| 2985 | WDR61        | -1.02 | 4.02E-01 | 6.61E-01 | 1454.72  | not significant |
| 2986 | ILK          | -1.02 | 3.94E-01 | 6.54E-01 | 1671.04  | not significant |
| 2987 | TPCN1        | -1.02 | 4.00E-01 | 6.59E-01 | 922.56   | not significant |
| 2988 | NEMF         | -1.02 | 3.99E-01 | 6.59E-01 | 1857.18  | not significant |
| 2989 | MRS2         | -1.02 | 3.80E-01 | 6.44E-01 | 1888.75  | not significant |
| 2990 | SSBP4        | -1.02 | 3.63E-01 | 6.28E-01 | 4543.98  | not significant |
| 2991 | TF2          | -1.02 | 3.68E-01 | 6.33E-01 | 3773.60  | not significant |
| 2992 | TTI1         | -1.02 | 3.68E-01 | 6.33E-01 | 3578.58  | not significant |
| 2993 | MTF2         | -1.02 | 3.01E-01 | 5.72E-01 | 5762.81  | not significant |
| 2994 | SACM1L       | -1.02 | 3.31E-01 | 5.99E-01 | 4859.57  | not significant |
| 2995 | LOC100379224 | -1.02 | 1.13E-01 | NA       | 73.05    | not significant |
| 2996 | IFIH1        | -1.02 | 3.92E-01 | 6.53E-01 | 548.84   | not significant |
| 2997 | ZNF426       | -1.02 | 3.91E-01 | 6.52E-01 | 559.76   | not significant |
| 2998 | SGPL1        | -1.02 | 3.85E-01 | 6.47E-01 | 1611.76  | not significant |
| 2999 | TMEM39A      | -1.02 | 3.93E-01 | 6.54E-01 | 1516.58  | not significant |
| 3000 | WDR41        | -1.02 | 3.87E-01 | 6.48E-01 | 1860.42  | not significant |
| 3001 | CDK4         | -1.02 | 3.57E-01 | 6.23E-01 | 9009.99  | not significant |
| 3002 | TMEM65       | -1.02 | 3.91E-01 | 6.52E-01 | 1734.72  | not significant |
| 3003 | ALDH5A1      | -1.02 | 3.75E-01 | 6.40E-01 | 2354.92  | not significant |
| 3004 | FEM1B        | -1.02 | 3.84E-01 | 6.46E-01 | 2285.15  | not significant |
| 3005 | PDE12        | -1.02 | 3.98E-01 | 6.58E-01 | 2517.65  | not significant |
| 3006 | ZFP69        | -1.02 | 2.63E-01 | 5.34E-01 | 173.49   | not significant |
| 3007 | TMEM199      | -1.02 | 4.05E-01 | 6.63E-01 | 227.33   | not significant |
| 3008 | C2orf76      | -1.02 | 3.12E-01 | 5.84E-01 | 224.80   | not significant |
| 3009 | SRRD         | -1.02 | 3.97E-01 | 6.56E-01 | 609.02   | not significant |
| 3010 | RASSF5       | -1.02 | 3.94E-01 | 6.54E-01 | 737.50   | not significant |
| 3011 | BTBD10       | -1.02 | 4.02E-01 | 6.61E-01 | 1082.70  | not significant |
| 3012 | NGLY1        | -1.02 | 3.83E-01 | 6.46E-01 | 2075.55  | not significant |
| 3013 | TRAF3        | -1.02 | 3.41E-01 | 6.08E-01 | 3914.75  | not significant |
| 3014 | 43714_12910  | -1.02 | 3.03E-01 | 5.75E-01 | 15264.44 | not significant |
| 3015 | C5orf66      | -1.02 | 1.44E-02 | NA       | 35.23    | not significant |
| 3016 | FUCA1        | -1.02 | 3.45E-01 | 6.11E-01 | 279.27   | not significant |
| 3017 | TRIM27       | -1.02 | 3.97E-01 | 6.56E-01 | 587.04   | not significant |
| 3018 | SSU72        | -1.02 | 3.74E-01 | 6.39E-01 | 3678.97  | not significant |
| 3019 | PCMT1        | -1.02 | 3.65E-01 | 6.29E-01 | 3427.26  | not significant |
| 3020 | NUP155       | -1.02 | 3.90E-01 | 6.52E-01 | 3099.33  | not significant |
| 3021 | TMEM141      | -1.02 | 3.56E-01 | 6.21E-01 | 348.05   | not significant |
| 3022 | RNF34        | -1.02 | 3.40E-01 | 6.07E-01 | 266.38   | not significant |
| 3023 | TRIM26       | -1.02 | 3.86E-01 | 6.48E-01 | 462.33   | not significant |
| 3024 | CRYZ         | -1.02 | 4.08E-01 | 6.66E-01 | 1147.82  | not significant |
| 3025 | PTRH2        | -1.02 | 4.08E-01 | 6.66E-01 | 1093.83  | not significant |
| 3026 | INTS9        | -1.02 | 3.95E-01 | 6.55E-01 | 1489.68  | not significant |
| 3027 | SMIM12       | -1.02 | 4.05E-01 | 6.63E-01 | 1325.98  | not significant |
| 3028 | EPDR1        | -1.02 | 3.89E-01 | 6.50E-01 | 1432.03  | not significant |
| 3029 | SAE1         | -1.02 | 3.26E-01 | 5.95E-01 | 9427.22  | not significant |
| 3030 | GPATCH8      | -1.02 | 3.91E-01 | 6.52E-01 | 3285.53  | not significant |
| 3031 | NUDT4        | -1.02 | 1.22E-01 | NA       | 61.41    | not significant |
| 3032 | FAM177A1     | -1.02 | 3.87E-01 | 6.48E-01 | 460.06   | not significant |
| 3033 | OTUD6B-AS1   | -1.02 | 4.12E-01 | 6.70E-01 | 1564.29  | not significant |
| 3034 | VAR5         | -1.02 | 3.63E-01 | 6.27E-01 | 3398.70  | not significant |
| 3035 | ZBTB11       | -1.02 | 3.79E-01 | 6.44E-01 | 2320.30  | not significant |
| 3036 | SCAF1        | -1.02 | 3.63E-01 | 6.28E-01 | 3709.92  | not significant |
| 3037 | TBC1D2B      | -1.02 | 3.95E-01 | 6.54E-01 | 2109.62  | not significant |
| 3038 | PTPN14       | -1.02 | 2.99E-01 | 5.70E-01 | 187.51   | not significant |
| 3039 | ZNF155       | -1.02 | 3.52E-01 | 6.19E-01 | 334.80   | not significant |
| 3040 | MT1X         | -1.02 | 4.18E-01 | 6.73E-01 | 9540.35  | not significant |
| 3041 | TRAP1        | -1.02 | 3.74E-01 | 6.38E-01 | 2921.66  | not significant |
| 3042 | ESCO1        | -1.02 | 4.05E-01 | 6.63E-01 | 1628.44  | not significant |
| 3043 | FAM60A       | -1.02 | 3.58E-01 | 6.23E-01 | 4195.84  | not significant |
| 3044 | MAP6D1       | -1.02 | 1.31E-01 | NA       | 67.13    | not significant |
| 3045 | ARHGAP31     | -1.02 | 1.73E-01 | NA       | 82.07    | not significant |
| 3046 | IFT46        | -1.02 | 3.56E-01 | 6.22E-01 | 287.67   | not significant |
| 3047 | ZNF8         | -1.02 | 3.48E-01 | 6.15E-01 | 313.45   | not significant |
| 3048 | BBS4         | -1.02 | 3.71E-01 | 6.36E-01 | 346.39   | not significant |
| 3049 | TRIP4        | -1.02 | 3.97E-01 | 6.56E-01 | 499.64   | not significant |
| 3050 | ZNF566       | -1.02 | 3.94E-01 | 6.54E-01 | 481.53   | not significant |
| 3051 | ACOT13       | -1.02 | 4.11E-01 | 6.69E-01 | 696.14   | not significant |
| 3052 | TBP          | -1.02 | 4.14E-01 | 6.72E-01 | 1054.11  | not significant |
| 3053 | LSM10        | -1.02 | 4.20E-01 | 6.75E-01 | 1133.16  | not significant |
| 3054 | IGLL1        | -1.02 | 4.16E-01 | 6.72E-01 | 1426.91  | not significant |
| 3055 | CENPN        | -1.02 | 3.80E-01 | 6.44E-01 | 3141.54  | not significant |
| 3056 | VPS33A       | -1.02 | 3.97E-01 | 6.57E-01 | 1911.08  | not significant |
| 3057 | HERPUD1      | -1.02 | 3.81E-01 | 6.45E-01 | 2658.42  | not significant |
| 3058 | CTCF         | -1.02 | 3.37E-01 | 6.05E-01 | 4915.28  | not significant |
| 3059 | FSD1L        | -1.02 | 4.45E-01 | 6.96E-01 | 195.66   | not significant |
| 3060 | ENPP1        | -1.02 | 3.70E-01 | 6.35E-01 | 368.70   | not significant |
| 3061 | RTKN2        | -1.02 | 4.16E-01 | 6.72E-01 | 1039.06  | not significant |
| 3062 | MLLT3        | -1.02 | 4.01E-01 | 6.60E-01 | 1856.22  | not significant |
| 3063 | PRDX3        | -1.02 | 3.51E-01 | 6.18E-01 | 9035.68  | not significant |
| 3064 | CA6          | -1.02 | 9.90E-02 | NA       | 51.00    | not significant |
| 3065 | IFFO2        | -1.02 | 2.77E-01 | 5.47E-01 | 166.00   | not significant |
| 3066 | METTL22      | -1.02 | 4.00E-01 | 6.59E-01 | 474.57   | not significant |
| 3067 | WDR47        | -1.02 | 4.16E-01 | 6.73E-01 | 682.71   | not significant |

|      |              |       |          |          |          |                 |
|------|--------------|-------|----------|----------|----------|-----------------|
| 3068 | MBIP         | -1.02 | 4.17E-01 | 6.73E-01 | 778.08   | not significant |
| 3069 | COPS7A       | -1.02 | 4.16E-01 | 6.73E-01 | 1260.87  | not significant |
| 3070 | PSMB4        | -1.02 | 3.90E-01 | 6.51E-01 | 6709.83  | not significant |
| 3071 | FYN          | -1.02 | 3.77E-01 | 6.42E-01 | 4039.56  | not significant |
| 3072 | PPP1CA       | -1.02 | 4.31E-01 | 6.85E-01 | 10945.92 | not significant |
| 3073 | PIP5K1A      | -1.02 | 3.60E-01 | 6.25E-01 | 4686.72  | not significant |
| 3074 | ADNP         | -1.02 | 3.53E-01 | 6.19E-01 | 6215.03  | not significant |
| 3075 | ANGPTL2      | -1.02 | 2.11E-01 | 4.75E-01 | 103.23   | not significant |
| 3076 | DNAH17       | -1.02 | 1.98E-01 | NA       | 95.33    | not significant |
| 3077 | HELZ         | -1.02 | 4.19E-01 | 6.74E-01 | 7032.69  | not significant |
| 3078 | NDUFA8       | -1.02 | 4.23E-01 | 6.78E-01 | 1048.03  | not significant |
| 3079 | NXT2         | -1.02 | 4.20E-01 | 6.75E-01 | 955.38   | not significant |
| 3080 | ERCC2        | -1.02 | 4.20E-01 | 6.75E-01 | 944.55   | not significant |
| 3081 | MRPS5        | -1.02 | 3.93E-01 | 6.54E-01 | 2556.57  | not significant |
| 3082 | WWP2         | -1.02 | 4.04E-01 | 6.63E-01 | 1808.26  | not significant |
| 3083 | SLU7         | -1.02 | 4.01E-01 | 6.60E-01 | 2005.84  | not significant |
| 3084 | ZWINT        | -1.02 | 3.45E-01 | 6.12E-01 | 7229.12  | not significant |
| 3085 | CPNE3        | -1.02 | 3.60E-01 | 6.25E-01 | 4621.65  | not significant |
| 3086 | PPIP5K1      | -1.02 | 2.95E-01 | 5.66E-01 | 173.99   | not significant |
| 3087 | MRPS22       | -1.02 | 4.21E-01 | 6.76E-01 | 1020.14  | not significant |
| 3088 | TCEB1        | -1.02 | 4.04E-01 | 6.62E-01 | 3101.49  | not significant |
| 3089 | STAT6        | -1.02 | 3.48E-01 | 6.15E-01 | 5018.73  | not significant |
| 3090 | PRG4         | -1.02 | 7.14E-02 | NA       | 43.47    | not significant |
| 3091 | DMD          | -1.02 | 2.95E-01 | 5.66E-01 | 168.76   | not significant |
| 3092 | CYB5RL       | -1.02 | 4.03E-01 | 6.62E-01 | 499.85   | not significant |
| 3093 | PDCD5        | -1.02 | 4.23E-01 | 6.78E-01 | 1540.05  | not significant |
| 3094 | ZUFSP        | -1.02 | 4.13E-01 | 6.71E-01 | 740.01   | not significant |
| 3095 | METTL5       | -1.02 | 4.23E-01 | 6.78E-01 | 923.34   | not significant |
| 3096 | RWDD1        | -1.02 | 3.95E-01 | 6.55E-01 | 2455.87  | not significant |
| 3097 | PRC1         | -1.02 | 4.02E-01 | 6.61E-01 | 2305.31  | not significant |
| 3098 | PPM1F        | -1.02 | 4.11E-01 | 6.69E-01 | 1744.29  | not significant |
| 3099 | VMA21        | -1.02 | 3.61E-01 | 6.25E-01 | 4183.85  | not significant |
| 3100 | USP1         | -1.02 | 3.29E-01 | 5.97E-01 | 9047.32  | not significant |
| 3101 | KPNA5        | -1.02 | 3.59E-01 | 6.24E-01 | 429.73   | not significant |
| 3102 | RPGR         | -1.02 | 4.59E-01 | 7.06E-01 | 473.65   | not significant |
| 3103 | MALSU1       | -1.02 | 4.26E-01 | 6.79E-01 | 974.64   | not significant |
| 3104 | PPIH         | -1.02 | 4.06E-01 | 6.64E-01 | 2242.31  | not significant |
| 3105 | DCLRE1B      | -1.02 | 4.12E-01 | 6.69E-01 | 1609.82  | not significant |
| 3106 | IFT122       | -1.02 | 4.24E-01 | 6.79E-01 | 977.93   | not significant |
| 3107 | NADK         | -1.02 | 3.84E-01 | 6.46E-01 | 3049.89  | not significant |
| 3108 | NLRC3        | -1.02 | 3.99E-01 | 6.59E-01 | 2491.66  | not significant |
| 3109 | CAPN3        | -1.02 | 8.81E-02 | NA       | 47.81    | not significant |
| 3110 | C2orf74      | -1.02 | 2.56E-01 | 5.25E-01 | 130.72   | not significant |
| 3111 | GABARAPL1    | -1.02 | 3.04E-01 | 5.76E-01 | 205.29   | not significant |
| 3112 | CBX2         | -1.02 | 3.61E-01 | 6.26E-01 | 269.28   | not significant |
| 3113 | RBAK         | -1.02 | 4.30E-01 | 6.84E-01 | 1222.10  | not significant |
| 3114 | COX19        | -1.02 | 4.09E-01 | 6.67E-01 | 1414.61  | not significant |
| 3115 | HADHB        | -1.02 | 4.05E-01 | 6.64E-01 | 2310.99  | not significant |
| 3116 | USP37        | -1.02 | 4.09E-01 | 6.67E-01 | 2482.49  | not significant |
| 3117 | MMGT1        | -1.02 | 1.38E-01 | NA       | 62.50    | not significant |
| 3118 | ZNF805       | -1.02 | 3.93E-01 | 6.54E-01 | 401.06   | not significant |
| 3119 | USP8         | -1.02 | 4.15E-01 | 6.72E-01 | 1734.43  | not significant |
| 3120 | TAGLN2       | -1.02 | 3.66E-01 | 6.30E-01 | 10610.48 | not significant |
| 3121 | YWHAQ        | -1.02 | 3.57E-01 | 6.22E-01 | 16589.25 | not significant |
| 3122 | SH3BP5-AS1   | -1.02 | 3.02E-01 | 5.73E-01 | 195.17   | not significant |
| 3123 | C19orf44     | -1.02 | 3.48E-01 | 6.15E-01 | 246.22   | not significant |
| 3124 | FRG1B        | -1.02 | 4.59E-01 | 7.06E-01 | 764.59   | not significant |
| 3125 | POLR2F       | -1.02 | 4.34E-01 | 6.88E-01 | 2266.70  | not significant |
| 3126 | DECR1        | -1.02 | 4.12E-01 | 6.70E-01 | 1419.50  | not significant |
| 3127 | RALBP1       | -1.02 | 3.88E-01 | 6.49E-01 | 3503.36  | not significant |
| 3128 | MST4         | -1.02 | 3.36E-01 | 6.04E-01 | 5992.94  | not significant |
| 3129 | RBPJ         | -1.02 | 4.10E-01 | 6.68E-01 | 3300.31  | not significant |
| 3130 | TYW1B        | -1.02 | 1.11E-01 | NA       | 52.80    | not significant |
| 3131 | DDA1         | -1.02 | 4.25E-01 | 6.79E-01 | 1944.69  | not significant |
| 3132 | HPS4         | -1.02 | 4.11E-01 | 6.69E-01 | 2602.73  | not significant |
| 3133 | TRAFD1       | -1.02 | 4.04E-01 | 6.63E-01 | 2386.16  | not significant |
| 3134 | PARP9        | -1.02 | 4.07E-01 | 6.65E-01 | 2438.67  | not significant |
| 3135 | CTPS1        | -1.02 | 3.27E-01 | 5.95E-01 | 7378.99  | not significant |
| 3136 | GCSH         | -1.02 | 2.19E-01 | 4.86E-01 | 103.28   | not significant |
| 3137 | CA5BP1       | -1.02 | 2.76E-01 | 5.46E-01 | 137.85   | not significant |
| 3138 | ZNF880       | -1.02 | 3.52E-01 | 6.19E-01 | 248.26   | not significant |
| 3139 | IQCC         | -1.02 | 3.99E-01 | 6.59E-01 | 411.80   | not significant |
| 3140 | ZNF786       | -1.02 | 3.79E-01 | 6.44E-01 | 365.04   | not significant |
| 3141 | TCP11L1      | -1.02 | 4.04E-01 | 6.63E-01 | 630.76   | not significant |
| 3142 | NDUFS5       | -1.02 | 4.29E-01 | 6.82E-01 | 2622.40  | not significant |
| 3143 | GSTCD        | -1.02 | 4.34E-01 | 6.88E-01 | 1061.54  | not significant |
| 3144 | SMC2         | -1.02 | 3.59E-01 | 6.24E-01 | 5486.09  | not significant |
| 3145 | LOC100996351 | -1.02 | 4.08E-02 | NA       | 32.55    | not significant |
| 3146 | ZSCAN20      | -1.02 | 2.82E-01 | 5.53E-01 | 147.79   | not significant |
| 3147 | NKAP         | -1.02 | 4.01E-01 | 6.60E-01 | 758.46   | not significant |
| 3148 | ILKAP        | -1.02 | 4.34E-01 | 6.88E-01 | 1549.98  | not significant |
| 3149 | SLC38A5      | -1.02 | 4.36E-01 | 6.88E-01 | 1050.24  | not significant |
| 3150 | LMBR1        | -1.02 | 4.17E-01 | 6.73E-01 | 2009.23  | not significant |
| 3151 | ATXN10       | -1.02 | 3.79E-01 | 6.44E-01 | 5586.84  | not significant |
| 3152 | DCAF12       | -1.02 | 3.81E-01 | 6.45E-01 | 3841.04  | not significant |
| 3153 | HIRA         | -1.02 | 3.62E-01 | 6.26E-01 | 4863.77  | not significant |
| 3154 | TBKBP1       | -1.02 | 1.12E-01 | NA       | 53.41    | not significant |
| 3155 | ZNF799       | -1.02 | 3.71E-01 | 6.36E-01 | 270.09   | not significant |

|      |           |       |          |          |          |                 |
|------|-----------|-------|----------|----------|----------|-----------------|
| 3156 | RWDD4     | -1.02 | 4.31E-01 | 6.85E-01 | 638.99   | not significant |
| 3157 | ZNF227    | -1.02 | 4.42E-01 | 6.93E-01 | 935.24   | not significant |
| 3158 | EXOSC7    | -1.02 | 4.36E-01 | 6.89E-01 | 1158.57  | not significant |
| 3159 | MED10     | -1.02 | 4.37E-01 | 6.89E-01 | 2008.75  | not significant |
| 3160 | ZNF7      | -1.02 | 4.36E-01 | 6.89E-01 | 945.28   | not significant |
| 3161 | HEATR3    | -1.02 | 4.36E-01 | 6.89E-01 | 1181.33  | not significant |
| 3162 | OSBPL11   | -1.02 | 4.25E-01 | 6.79E-01 | 2115.70  | not significant |
| 3163 | SPATS2    | -1.02 | 4.38E-01 | 6.90E-01 | 1105.07  | not significant |
| 3164 | MIOS      | -1.02 | 4.40E-01 | 6.92E-01 | 928.88   | not significant |
| 3165 | CSTF1     | -1.02 | 4.22E-01 | 6.77E-01 | 1408.10  | not significant |
| 3166 | RFWD3     | -1.02 | 3.55E-01 | 6.21E-01 | 6648.81  | not significant |
| 3167 | TMED2     | -1.02 | 3.16E-01 | 5.86E-01 | 12232.91 | not significant |
| 3168 | MECR      | -1.02 | 4.40E-01 | 6.92E-01 | 663.44   | not significant |
| 3169 | TGDS      | -1.02 | 4.40E-01 | 6.92E-01 | 1046.85  | not significant |
| 3170 | DIABLO    | -1.02 | 4.21E-01 | 6.76E-01 | 2576.81  | not significant |
| 3171 | BTAF1     | -1.02 | 4.07E-01 | 6.66E-01 | 4451.23  | not significant |
| 3172 | PIK3R2    | -1.02 | 4.29E-01 | 6.83E-01 | 1486.34  | not significant |
| 3173 | SOC57     | -1.02 | 3.15E-01 | 5.86E-01 | 168.31   | not significant |
| 3174 | LIMS2     | -1.02 | 4.42E-01 | 6.93E-01 | 828.09   | not significant |
| 3175 | GFOD2     | -1.02 | 4.45E-01 | 6.96E-01 | 1067.83  | not significant |
| 3176 | DNPEP     | -1.02 | 4.14E-01 | 6.72E-01 | 2639.17  | not significant |
| 3177 | KIAA1191  | -1.02 | 4.29E-01 | 6.82E-01 | 1732.55  | not significant |
| 3178 | TTY15     | -1.02 | 4.42E-01 | 6.93E-01 | 1519.92  | not significant |
| 3179 | GTF2F1    | -1.02 | 3.81E-01 | 6.45E-01 | 4408.73  | not significant |
| 3180 | MOB1A     | -1.02 | 4.00E-01 | 6.60E-01 | 4274.32  | not significant |
| 3181 | HKDC1     | -1.02 | 2.56E-01 | 5.25E-01 | 117.87   | not significant |
| 3182 | ZNF596    | -1.02 | 3.16E-01 | 5.86E-01 | 166.99   | not significant |
| 3183 | STEAP1B   | -1.02 | 2.12E-01 | NA       | 90.32    | not significant |
| 3184 | SCFD2     | -1.02 | 4.43E-01 | 6.94E-01 | 1028.76  | not significant |
| 3185 | RRAGC     | -1.02 | 4.42E-01 | 6.93E-01 | 1266.85  | not significant |
| 3186 | SP4       | -1.02 | 4.32E-01 | 6.85E-01 | 1937.56  | not significant |
| 3187 | GRSF1     | -1.02 | 3.47E-01 | 6.14E-01 | 7254.47  | not significant |
| 3188 | CDC73     | -1.02 | 4.27E-01 | 6.81E-01 | 2075.33  | not significant |
| 3189 | APPBP2    | -1.02 | 4.10E-01 | 6.68E-01 | 2628.00  | not significant |
| 3190 | TPM1      | -1.02 | 1.17E-01 | NA       | 50.57    | not significant |
| 3191 | WBP5      | -1.02 | 3.56E-01 | 6.22E-01 | 219.88   | not significant |
| 3192 | TUBD1     | -1.02 | 4.16E-01 | 6.72E-01 | 396.47   | not significant |
| 3193 | TRIM59    | -1.02 | 4.46E-01 | 6.96E-01 | 689.69   | not significant |
| 3194 | SIK3      | -1.02 | 4.47E-01 | 6.97E-01 | 995.72   | not significant |
| 3195 | ARHGAP17  | -1.02 | 4.08E-01 | 6.66E-01 | 2470.33  | not significant |
| 3196 | IMPAD1    | -1.02 | 4.10E-01 | 6.68E-01 | 5354.68  | not significant |
| 3197 | PUM1      | -1.02 | 3.87E-01 | 6.48E-01 | 3804.62  | not significant |
| 3198 | G3BP1     | -1.02 | 3.35E-01 | 6.04E-01 | 11515.61 | not significant |
| 3199 | MROH8     | -1.02 | 2.06E-01 | NA       | 84.99    | not significant |
| 3200 | ACP6      | -1.02 | 2.52E-01 | 5.21E-01 | 140.57   | not significant |
| 3201 | TMEM189   | -1.02 | 4.49E-01 | 6.99E-01 | 1308.82  | not significant |
| 3202 | DNAJC24   | -1.02 | 4.48E-01 | 6.98E-01 | 861.48   | not significant |
| 3203 | SMAP1     | -1.02 | 4.37E-01 | 6.90E-01 | 1707.70  | not significant |
| 3204 | PIGK      | -1.02 | 4.29E-01 | 6.83E-01 | 1396.38  | not significant |
| 3205 | PPA1      | -1.02 | 3.94E-01 | 6.54E-01 | 8495.69  | not significant |
| 3206 | ARMC4     | -1.02 | 1.64E-01 | NA       | 65.08    | not significant |
| 3207 | CLEC12A   | -1.02 | 2.42E-01 | NA       | 99.28    | not significant |
| 3208 | ZNF121    | -1.02 | 2.71E-01 | 5.41E-01 | 556.42   | not significant |
| 3209 | C19orf24  | -1.02 | 4.47E-01 | 6.97E-01 | 1268.05  | not significant |
| 3210 | SKI       | -1.02 | 4.21E-01 | 6.76E-01 | 398.82   | not significant |
| 3211 | ATP6V1E1  | -1.02 | 4.28E-01 | 6.82E-01 | 3324.20  | not significant |
| 3212 | MKRN1     | -1.02 | 4.26E-01 | 6.79E-01 | 2690.01  | not significant |
| 3213 | RBM22     | -1.02 | 4.10E-01 | 6.68E-01 | 3032.28  | not significant |
| 3214 | HNRNPA2B1 | -1.02 | 4.12E-01 | 6.69E-01 | 66003.26 | not significant |
| 3215 | MIR22HG   | -1.02 | 1.38E-01 | NA       | 60.66    | not significant |
| 3216 | CCDC62    | -1.02 | 1.23E-01 | NA       | 58.16    | not significant |
| 3217 | RABIF     | -1.02 | 4.53E-01 | 7.02E-01 | 853.71   | not significant |
| 3218 | ANAPC15   | -1.02 | 4.50E-01 | 6.99E-01 | 1540.19  | not significant |
| 3219 | STX10     | -1.02 | 4.44E-01 | 6.95E-01 | 1959.20  | not significant |
| 3220 | CAPN7     | -1.02 | 4.51E-01 | 7.00E-01 | 1640.62  | not significant |
| 3221 | SP1       | -1.02 | 4.07E-01 | 6.66E-01 | 5867.65  | not significant |
| 3222 | MAST2     | -1.02 | 4.50E-01 | 6.99E-01 | 2178.64  | not significant |
| 3223 | ZC3H18    | -1.02 | 3.74E-01 | 6.38E-01 | 4764.85  | not significant |
| 3224 | PELP1     | -1.02 | 3.91E-01 | 6.52E-01 | 4768.78  | not significant |
| 3225 | SF3B2     | -1.02 | 3.46E-01 | 6.13E-01 | 12596.77 | not significant |
| 3226 | BPTF      | -1.02 | 4.60E-01 | 7.07E-01 | 6693.61  | not significant |
| 3227 | GPRIN3    | -1.02 | 3.86E-01 | 6.48E-01 | 300.54   | not significant |
| 3228 | CYB561D1  | -1.02 | 4.45E-01 | 6.96E-01 | 582.02   | not significant |
| 3229 | COMMD2    | -1.02 | 4.61E-01 | 7.07E-01 | 1724.17  | not significant |
| 3230 | PSMD8     | -1.02 | 4.11E-01 | 6.69E-01 | 6023.00  | not significant |
| 3231 | SYMPK     | -1.02 | 3.91E-01 | 6.52E-01 | 4127.31  | not significant |
| 3232 | NUP133    | -1.02 | 4.11E-01 | 6.69E-01 | 3299.07  | not significant |
| 3233 | BRD2      | -1.02 | 4.48E-01 | 6.98E-01 | 2772.11  | not significant |
| 3234 | RFX3-AS1  | -1.02 | 1.74E-01 | NA       | 66.52    | not significant |
| 3235 | DNTTIP1   | -1.02 | 4.85E-01 | 7.26E-01 | 1331.27  | not significant |
| 3236 | SERTAD2   | -1.02 | 4.56E-01 | 7.04E-01 | 1424.14  | not significant |
| 3237 | ZNF264    | -1.02 | 4.54E-01 | 7.03E-01 | 1249.20  | not significant |
| 3238 | PAG1      | -1.02 | 4.09E-01 | 6.67E-01 | 5894.33  | not significant |
| 3239 | TEX14     | -1.02 | 2.37E-02 | NA       | 23.34    | not significant |
| 3240 | TNFSF14   | -1.02 | 1.47E-01 | NA       | 60.03    | not significant |
| 3241 | ADAM1A    | -1.02 | 3.95E-01 | 6.55E-01 | 233.16   | not significant |
| 3242 | HOMER2    | -1.02 | 4.04E-01 | 6.63E-01 | 395.64   | not significant |
| 3243 | ZNF585B   | -1.02 | 4.53E-01 | 7.02E-01 | 649.44   | not significant |



|      |          |       |          |          |          |                 |
|------|----------|-------|----------|----------|----------|-----------------|
| 3244 | MYO1C    | -1.02 | 4.58E-01 | 7.05E-01 | 778.08   | not significant |
| 3245 | CRY2     | -1.02 | 4.57E-01 | 7.05E-01 | 999.65   | not significant |
| 3246 | TIMMDC1  | -1.02 | 4.67E-01 | 7.12E-01 | 1699.46  | not significant |
| 3247 | ITGAE    | -1.02 | 4.33E-01 | 6.87E-01 | 3277.78  | not significant |
| 3248 | ATG12    | -1.02 | 4.48E-01 | 6.98E-01 | 1701.92  | not significant |
| 3249 | BEND4    | -1.02 | 4.57E-01 | 7.05E-01 | 1546.02  | not significant |
| 3250 | EHD3     | -1.02 | 2.43E-01 | 5.11E-01 | 104.59   | not significant |
| 3251 | METTL7A  | -1.02 | 2.23E-01 | NA       | 91.18    | not significant |
| 3252 | CWC15    | -1.02 | 4.38E-01 | 6.90E-01 | 701.78   | not significant |
| 3253 | SIRT5    | -1.02 | 4.47E-01 | 6.97E-01 | 462.85   | not significant |
| 3254 | UFSP2    | -1.02 | 4.61E-01 | 7.07E-01 | 779.76   | not significant |
| 3255 | SOCS2    | -1.02 | 4.43E-01 | 6.93E-01 | 2443.57  | not significant |
| 3256 | MAPKBP1  | -1.02 | 4.57E-01 | 7.05E-01 | 1211.29  | not significant |
| 3257 | GPR68    | -1.02 | 4.49E-01 | 6.99E-01 | 1480.70  | not significant |
| 3258 | TANK     | -1.02 | 4.45E-01 | 6.96E-01 | 1821.04  | not significant |
| 3259 | SRSF6    | -1.02 | 3.27E-01 | 5.95E-01 | 13397.24 | not significant |
| 3260 | AOC3     | -1.02 | 7.69E-02 | NA       | 36.63    | not significant |
| 3261 | FBLN5    | -1.02 | 2.56E-01 | 5.24E-01 | 122.15   | not significant |
| 3262 | MXI1     | -1.02 | 3.67E-01 | 6.31E-01 | 208.22   | not significant |
| 3263 | ZNF79    | -1.02 | 4.01E-01 | 6.60E-01 | 323.87   | not significant |
| 3264 | NDUFA7   | -1.02 | 4.66E-01 | 7.11E-01 | 1205.20  | not significant |
| 3265 | PUS3     | -1.02 | 4.54E-01 | 7.03E-01 | 583.35   | not significant |
| 3266 | TMEM110  | -1.02 | 4.61E-01 | 7.07E-01 | 1187.75  | not significant |
| 3267 | EXOSC10  | -1.02 | 4.15E-01 | 6.72E-01 | 3639.10  | not significant |
| 3268 | AIFM2    | -1.02 | 1.61E-01 | NA       | 60.56    | not significant |
| 3269 | FAM206A  | -1.02 | 4.55E-01 | 7.04E-01 | 582.20   | not significant |
| 3270 | EMC2     | -1.02 | 4.59E-01 | 7.06E-01 | 522.36   | not significant |
| 3271 | GZMA     | -1.02 | 4.64E-01 | 7.10E-01 | 1025.70  | not significant |
| 3272 | SLC25A30 | -1.02 | 4.63E-01 | 7.09E-01 | 1176.95  | not significant |
| 3273 | LAP3     | -1.02 | 4.52E-01 | 7.01E-01 | 1939.81  | not significant |
| 3274 | PHF20    | -1.02 | 4.35E-01 | 6.88E-01 | 3095.68  | not significant |
| 3275 | SSRP1    | -1.02 | 3.73E-01 | 6.38E-01 | 14645.18 | not significant |
| 3276 | ZNF564   | -1.01 | 3.97E-01 | 6.56E-01 | 292.87   | not significant |
| 3277 | CHRNA9   | -1.01 | 4.06E-01 | 6.64E-01 | 278.47   | not significant |
| 3278 | ZNF543   | -1.01 | 4.12E-01 | 6.69E-01 | 350.63   | not significant |
| 3279 | COQ5     | -1.01 | 4.57E-01 | 7.05E-01 | 756.09   | not significant |
| 3280 | TPM3P9   | -1.01 | 4.64E-01 | 7.10E-01 | 767.65   | not significant |
| 3281 | RBM15    | -1.01 | 4.75E-01 | 7.17E-01 | 1319.39  | not significant |
| 3282 | DGKE     | -1.01 | 4.65E-01 | 7.11E-01 | 1970.33  | not significant |
| 3283 | MRPS25   | -1.01 | 4.32E-01 | 6.85E-01 | 2556.84  | not significant |
| 3284 | TAX1BP1  | -1.01 | 4.24E-01 | 6.78E-01 | 3237.91  | not significant |
| 3285 | EMC1     | -1.01 | 4.48E-01 | 6.98E-01 | 2620.52  | not significant |
| 3286 | CHD8     | -1.01 | 4.25E-01 | 6.79E-01 | 5730.94  | not significant |
| 3287 | NFKBIE   | -1.01 | 4.27E-01 | 6.81E-01 | 340.90   | not significant |
| 3288 | APOPT1   | -1.01 | 4.69E-01 | 7.13E-01 | 1022.86  | not significant |
| 3289 | C2orf49  | -1.01 | 4.58E-01 | 7.05E-01 | 1717.68  | not significant |
| 3290 | P14KB    | -1.01 | 4.35E-01 | 6.88E-01 | 2536.47  | not significant |
| 3291 | LAT      | -1.01 | 3.69E-01 | 6.33E-01 | 10834.66 | not significant |
| 3292 | ZNF638   | -1.01 | 4.34E-01 | 6.88E-01 | 3254.33  | not significant |
| 3293 | TP1P2    | -1.01 | 9.23E-02 | NA       | 44.70    | not significant |
| 3294 | GBP5     | -1.01 | 4.58E-01 | 7.05E-01 | 547.20   | not significant |
| 3295 | NDUFAF1  | -1.01 | 4.38E-01 | 6.90E-01 | 390.03   | not significant |
| 3296 | TCFL5    | -1.01 | 4.70E-01 | 7.14E-01 | 899.07   | not significant |
| 3297 | L2HGDH   | -1.01 | 4.67E-01 | 7.12E-01 | 1206.34  | not significant |
| 3298 | HAUS2    | -1.01 | 4.52E-01 | 7.01E-01 | 1950.40  | not significant |
| 3299 | RHOT1    | -1.01 | 4.58E-01 | 7.05E-01 | 1980.45  | not significant |
| 3300 | MCAM     | -1.01 | 9.10E-02 | NA       | 40.23    | not significant |
| 3301 | WNK1     | -1.01 | 3.91E-01 | 6.52E-01 | 18000.57 | not significant |
| 3302 | FBXO31   | -1.01 | 4.69E-01 | 7.14E-01 | 1249.97  | not significant |
| 3303 | COASY    | -1.01 | 4.35E-01 | 6.88E-01 | 2969.65  | not significant |
| 3304 | GOLGA7   | -1.01 | 4.28E-01 | 6.82E-01 | 3299.00  | not significant |
| 3305 | NPM1     | -1.01 | 4.26E-01 | 6.80E-01 | 34066.24 | not significant |
| 3306 | DTX3L    | -1.01 | 4.39E-01 | 6.92E-01 | 3864.44  | not significant |
| 3307 | SPRY4    | -1.01 | 1.36E-01 | NA       | 49.67    | not significant |
| 3308 | SERTAD1  | -1.01 | 2.95E-01 | 5.66E-01 | 140.82   | not significant |
| 3309 | SACS     | -1.01 | 4.63E-01 | 7.09E-01 | 5736.67  | not significant |
| 3310 | CAMTA1   | -1.01 | 4.68E-01 | 7.13E-01 | 688.51   | not significant |
| 3311 | RCOR3    | -1.01 | 4.73E-01 | 7.16E-01 | 1188.09  | not significant |
| 3312 | TCEAL4   | -1.01 | 2.72E-01 | 5.43E-01 | 109.21   | not significant |
| 3313 | APTR     | -1.01 | 3.45E-01 | 6.12E-01 | 184.59   | not significant |
| 3314 | PRRC2C   | -1.01 | 2.97E-01 | 5.68E-01 | 17871.84 | not significant |
| 3315 | WASH3P   | -1.01 | 4.10E-01 | 6.68E-01 | 181.37   | not significant |
| 3316 | METTL15  | -1.01 | 4.44E-01 | 6.95E-01 | 387.59   | not significant |
| 3317 | NSUN5    | -1.01 | 4.65E-01 | 7.11E-01 | 699.15   | not significant |
| 3318 | ZNF415   | -1.01 | 4.53E-01 | 7.02E-01 | 427.71   | not significant |
| 3319 | MRRF     | -1.01 | 4.76E-01 | 7.18E-01 | 658.51   | not significant |
| 3320 | INTS5    | -1.01 | 4.74E-01 | 7.17E-01 | 1091.44  | not significant |
| 3321 | LEO1     | -1.01 | 4.71E-01 | 7.15E-01 | 1540.48  | not significant |
| 3322 | RSF1     | -1.01 | 4.74E-01 | 7.17E-01 | 1328.01  | not significant |
| 3323 | PTPN4    | -1.01 | 4.42E-01 | 6.93E-01 | 1653.83  | not significant |
| 3324 | PARP14   | -1.01 | 4.21E-01 | 6.76E-01 | 6448.19  | not significant |
| 3325 | MTDH     | -1.01 | 3.86E-01 | 6.48E-01 | 16497.93 | not significant |
| 3326 | GNA13    | -1.01 | 3.83E-01 | 6.46E-01 | 8861.11  | not significant |
| 3327 | TLL11    | -1.01 | 3.17E-01 | 5.86E-01 | 135.50   | not significant |
| 3328 | ZBTB25   | -1.01 | 4.14E-01 | 6.72E-01 | 279.66   | not significant |
| 3329 | FEZ2     | -1.01 | 4.44E-01 | 6.95E-01 | 527.09   | not significant |
| 3330 | SIDT2    | -1.01 | 4.29E-01 | 6.82E-01 | 306.23   | not significant |
| 3331 | DAAM1    | -1.01 | 4.64E-01 | 7.10E-01 | 535.06   | not significant |

|      |              |       |          |          |          |                 |
|------|--------------|-------|----------|----------|----------|-----------------|
| 3332 | ZNF268       | -1.01 | 4.77E-01 | 7.19E-01 | 1466.93  | not significant |
| 3333 | ARRB2        | -1.01 | 4.34E-01 | 6.88E-01 | 3852.59  | not significant |
| 3334 | RAP1GDS1     | -1.01 | 4.02E-01 | 6.61E-01 | 3844.48  | not significant |
| 3335 | HNRNP1       | -1.01 | 3.62E-01 | 6.26E-01 | 26115.00 | not significant |
| 3336 | BLOC1S2      | -1.01 | 4.79E-01 | 7.21E-01 | 1412.95  | not significant |
| 3337 | APC          | -1.01 | 4.80E-01 | 7.22E-01 | 1693.84  | not significant |
| 3338 | SCAMP3       | -1.01 | 4.76E-01 | 7.18E-01 | 1596.55  | not significant |
| 3339 | CMTM3        | -1.01 | 4.21E-01 | 6.76E-01 | 5558.58  | not significant |
| 3340 | SFMBT2       | -1.01 | 4.67E-01 | 7.12E-01 | 3143.05  | not significant |
| 3341 | TLK1         | -1.01 | 4.35E-01 | 6.88E-01 | 3693.86  | not significant |
| 3342 | ELAVL1       | -1.01 | 3.87E-01 | 6.48E-01 | 8441.45  | not significant |
| 3343 | WT1-AS       | -1.01 | 5.26E-02 | NA       | 29.91    | not significant |
| 3344 | FAHD2B       | -1.01 | 3.35E-01 | 6.04E-01 | 149.33   | not significant |
| 3345 | CORO7        | -1.01 | 4.67E-01 | 7.12E-01 | 506.16   | not significant |
| 3346 | ZFYVE19      | -1.01 | 4.81E-01 | 7.22E-01 | 790.45   | not significant |
| 3347 | TCF7L2       | -1.01 | 4.48E-01 | 6.98E-01 | 389.81   | not significant |
| 3348 | EDARADD      | -1.01 | 4.35E-01 | 6.88E-01 | 404.04   | not significant |
| 3349 | MRPL2        | -1.01 | 4.82E-01 | 7.22E-01 | 910.28   | not significant |
| 3350 | HKR1         | -1.01 | 4.81E-01 | 7.22E-01 | 835.52   | not significant |
| 3351 | SP110        | -1.01 | 4.68E-01 | 7.13E-01 | 1457.34  | not significant |
| 3352 | CREB1        | -1.01 | 4.59E-01 | 7.06E-01 | 2839.53  | not significant |
| 3353 | TLK3         | -1.01 | 4.16E-01 | 6.73E-01 | 8201.91  | not significant |
| 3354 | GPATCH1      | -1.01 | 4.87E-01 | 7.26E-01 | 731.94   | not significant |
| 3355 | IMP3         | -1.01 | 4.81E-01 | 7.22E-01 | 2242.07  | not significant |
| 3356 | MTERF3       | -1.01 | 4.68E-01 | 7.13E-01 | 1430.54  | not significant |
| 3357 | CHSY1        | -1.01 | 4.70E-01 | 7.14E-01 | 3462.27  | not significant |
| 3358 | PLCXD2       | -1.01 | 1.73E-01 | NA       | 62.43    | not significant |
| 3359 | LINC01184    | -1.01 | 3.90E-01 | 6.52E-01 | 203.86   | not significant |
| 3360 | LOC283070    | -1.01 | 4.27E-01 | 6.81E-01 | 276.08   | not significant |
| 3361 | TBCCD1       | -1.01 | 4.83E-01 | 7.24E-01 | 644.06   | not significant |
| 3362 | C11orf54     | -1.01 | 4.84E-01 | 7.24E-01 | 856.86   | not significant |
| 3363 | SH3BGR1      | -1.01 | 4.55E-01 | 7.04E-01 | 2677.74  | not significant |
| 3364 | RAB11A       | -1.01 | 4.45E-01 | 6.96E-01 | 3168.22  | not significant |
| 3365 | NUCKS1       | -1.01 | 3.67E-01 | 6.31E-01 | 16400.69 | not significant |
| 3366 | ZNF850       | -1.01 | 4.30E-01 | 6.83E-01 | 306.49   | not significant |
| 3367 | REXO2        | -1.01 | 5.37E-01 | 7.61E-01 | 792.59   | not significant |
| 3368 | SNRPE        | -1.01 | 4.80E-01 | 7.22E-01 | 1688.68  | not significant |
| 3369 | CCDC69       | -1.01 | 4.77E-01 | 7.19E-01 | 1904.48  | not significant |
| 3370 | PRKCI        | -1.01 | 4.74E-01 | 7.16E-01 | 2027.83  | not significant |
| 3371 | TP53BP1      | -1.01 | 4.77E-01 | 7.19E-01 | 2260.70  | not significant |
| 3372 | TMEM185B     | -1.01 | 4.65E-01 | 7.11E-01 | 2887.68  | not significant |
| 3373 | TRIM28       | -1.01 | 4.29E-01 | 6.83E-01 | 29239.64 | not significant |
| 3374 | N6AMT2       | -1.01 | 4.34E-01 | 6.88E-01 | 456.66   | not significant |
| 3375 | NAP1L5       | -1.01 | 4.39E-01 | 6.92E-01 | 349.04   | not significant |
| 3376 | ADPRHL2      | -1.01 | 4.89E-01 | 7.29E-01 | 1228.06  | not significant |
| 3377 | CLOCK        | -1.01 | 4.81E-01 | 7.22E-01 | 556.13   | not significant |
| 3378 | SDHC         | -1.01 | 4.89E-01 | 7.28E-01 | 1307.90  | not significant |
| 3379 | MICU1        | -1.01 | 4.66E-01 | 7.12E-01 | 2230.72  | not significant |
| 3380 | SMG9         | -1.01 | 4.65E-01 | 7.11E-01 | 2589.23  | not significant |
| 3381 | CELF2        | -1.01 | 4.68E-01 | 7.12E-01 | 11845.07 | not significant |
| 3382 | GNAI2        | -1.01 | 4.47E-01 | 6.97E-01 | 4044.75  | not significant |
| 3383 | GCLC         | -1.01 | 4.65E-01 | 7.11E-01 | 2381.93  | not significant |
| 3384 | RUNX1        | -1.01 | 4.32E-01 | 6.86E-01 | 8938.11  | not significant |
| 3385 | KLF9         | -1.01 | 1.12E-01 | NA       | 39.97    | not significant |
| 3386 | ZNF713       | -1.01 | 3.26E-01 | 5.94E-01 | 132.27   | not significant |
| 3387 | TCP10L       | -1.01 | 2.06E-01 | NA       | 72.90    | not significant |
| 3388 | ZNF253       | -1.01 | 4.89E-01 | 7.29E-01 | 640.17   | not significant |
| 3389 | LOC100419583 | -1.01 | 4.74E-01 | 7.17E-01 | 488.48   | not significant |
| 3390 | Cxorf56      | -1.01 | 4.92E-01 | 7.31E-01 | 933.83   | not significant |
| 3391 | PPA2         | -1.01 | 5.21E-01 | 7.51E-01 | 1117.56  | not significant |
| 3392 | MRPS31       | -1.01 | 4.93E-01 | 7.31E-01 | 1012.78  | not significant |
| 3393 | AP4S1        | -1.01 | 4.83E-01 | 7.24E-01 | 561.19   | not significant |
| 3394 | SGOL1        | -1.01 | 4.90E-01 | 7.29E-01 | 1394.15  | not significant |
| 3395 | INO80E       | -1.01 | 4.91E-01 | 7.30E-01 | 2456.72  | not significant |
| 3396 | USP5         | -1.01 | 4.66E-01 | 7.11E-01 | 2570.33  | not significant |
| 3397 | KLHL42       | -1.01 | 4.86E-01 | 7.26E-01 | 1806.26  | not significant |
| 3398 | TRAM2        | -1.01 | 4.88E-01 | 7.28E-01 | 1929.88  | not significant |
| 3399 | SIT1         | -1.01 | 4.86E-01 | 7.26E-01 | 591.81   | not significant |
| 3400 | LIX1L        | -1.01 | 4.50E-01 | 6.99E-01 | 350.90   | not significant |
| 3401 | FOXO3B       | -1.01 | 4.83E-01 | 7.24E-01 | 598.47   | not significant |
| 3402 | KIAA1429     | -1.01 | 4.57E-01 | 7.05E-01 | 3461.58  | not significant |
| 3403 | PPP1R15B     | -1.01 | 4.60E-01 | 7.07E-01 | 5490.27  | not significant |
| 3404 | CELSR3       | -1.01 | 4.78E-01 | 7.20E-01 | 2926.62  | not significant |
| 3405 | LANCL1       | -1.01 | 4.43E-01 | 6.94E-01 | 3708.49  | not significant |
| 3406 | SUZ12        | -1.01 | 4.15E-01 | 6.72E-01 | 5971.65  | not significant |
| 3407 | CBY1         | -1.01 | 3.18E-01 | 5.87E-01 | 123.20   | not significant |
| 3408 | ZFP69B       | -1.01 | 3.86E-01 | 6.48E-01 | 183.99   | not significant |
| 3409 | CMTM8        | -1.01 | 4.58E-01 | 7.05E-01 | 357.77   | not significant |
| 3410 | RASSF1       | -1.01 | 4.71E-01 | 7.14E-01 | 441.35   | not significant |
| 3411 | RPS26        | -1.01 | 4.76E-01 | 7.18E-01 | 4935.40  | not significant |
| 3412 | RNF139       | -1.01 | 4.89E-01 | 7.29E-01 | 1513.37  | not significant |
| 3413 | GIMAP7       | -1.01 | 4.30E-01 | 6.84E-01 | 6518.05  | not significant |
| 3414 | ZNF438       | -1.01 | 4.42E-01 | 6.93E-01 | 329.51   | not significant |
| 3415 | MRPL50       | -1.01 | 4.62E-01 | 7.08E-01 | 526.39   | not significant |
| 3416 | ZNF431       | -1.01 | 4.70E-01 | 7.14E-01 | 984.53   | not significant |
| 3417 | R3HCC1L      | -1.01 | 4.97E-01 | 7.35E-01 | 1113.73  | not significant |
| 3418 | EMD          | -1.01 | 4.95E-01 | 7.33E-01 | 698.71   | not significant |
| 3419 | SAFB2        | -1.01 | 4.52E-01 | 7.01E-01 | 3208.85  | not significant |

|      |            |       |          |          |          |                 |
|------|------------|-------|----------|----------|----------|-----------------|
| 3420 | PTPRA      | -1.01 | 4.33E-01 | 6.87E-01 | 4487.60  | not significant |
| 3421 | MED22      | -1.01 | 3.28E-01 | 5.96E-01 | 125.42   | not significant |
| 3422 | FAM8A1     | -1.01 | 4.72E-01 | 7.15E-01 | 419.91   | not significant |
| 3423 | KJAA0556   | -1.01 | 4.65E-01 | 7.11E-01 | 508.73   | not significant |
| 3424 | SRD5A1     | -1.01 | 4.91E-01 | 7.30E-01 | 566.13   | not significant |
| 3425 | UBE4A      | -1.01 | 4.87E-01 | 7.27E-01 | 1377.42  | not significant |
| 3426 | MTG2       | -1.01 | 5.00E-01 | 7.36E-01 | 836.72   | not significant |
| 3427 | TMEM184B   | -1.01 | 4.97E-01 | 7.35E-01 | 1360.86  | not significant |
| 3428 | UQCRC2     | -1.01 | 4.41E-01 | 6.92E-01 | 7581.88  | not significant |
| 3429 | YY1        | -1.01 | 4.26E-01 | 6.80E-01 | 5910.19  | not significant |
| 3430 | FHL3       | -1.01 | 4.01E-01 | 6.60E-01 | 203.18   | not significant |
| 3431 | COL6A3     | -1.01 | 3.59E-01 | 6.24E-01 | 152.37   | not significant |
| 3432 | HELB       | -1.01 | 4.15E-01 | 6.72E-01 | 236.44   | not significant |
| 3433 | CDC14A     | -1.01 | 4.74E-01 | 7.16E-01 | 418.32   | not significant |
| 3434 | FBXO38     | -1.01 | 4.99E-01 | 7.36E-01 | 1414.86  | not significant |
| 3435 | ZNF654     | -1.01 | 4.99E-01 | 7.36E-01 | 890.55   | not significant |
| 3436 | SLC30A1    | -1.01 | 4.89E-01 | 7.28E-01 | 1382.96  | not significant |
| 3437 | FAR2       | -1.01 | 4.89E-01 | 7.28E-01 | 1822.33  | not significant |
| 3438 | CLINT1     | -1.01 | 4.03E-01 | 6.62E-01 | 8484.47  | not significant |
| 3439 | CASKIN1    | -1.01 | 4.76E-02 | NA       | 31.22    | not significant |
| 3440 | SRGAP2D    | -1.01 | 1.07E-01 | NA       | 36.85    | not significant |
| 3441 | NETO1      | -1.01 | 2.56E-01 | NA       | 90.11    | not significant |
| 3442 | DOK3       | -1.01 | 3.21E-01 | 5.91E-01 | 120.35   | not significant |
| 3443 | PCNA-AS1   | -1.01 | 1.91E-01 | NA       | 66.56    | not significant |
| 3444 | KLF12      | -1.01 | 4.95E-01 | 7.33E-01 | 3298.83  | not significant |
| 3445 | ADSS       | -1.01 | 4.64E-01 | 7.10E-01 | 3439.15  | not significant |
| 3446 | SMARCD2    | -1.01 | 4.34E-01 | 6.88E-01 | 6617.76  | not significant |
| 3447 | SLFN12L    | -1.01 | 1.75E-01 | 4.31E-01 | 233.68   | not significant |
| 3448 | FOSL2      | -1.01 | 3.10E-01 | 5.81E-01 | 113.35   | not significant |
| 3449 | HERC6      | -1.01 | 3.71E-01 | 6.36E-01 | 175.89   | not significant |
| 3450 | FAM200A    | -1.01 | 5.16E-01 | 7.47E-01 | 447.90   | not significant |
| 3451 | CSRNP1     | -1.01 | 4.71E-01 | 7.15E-01 | 385.44   | not significant |
| 3452 | CYP2U1     | -1.01 | 4.64E-01 | 7.10E-01 | 487.09   | not significant |
| 3453 | ZDHC2      | -1.01 | 4.64E-01 | 7.10E-01 | 5456.14  | not significant |
| 3454 | PTBP3      | -1.01 | 4.29E-01 | 6.82E-01 | 8119.69  | not significant |
| 3455 | SENPA8     | -1.01 | 1.75E-01 | NA       | 53.76    | not significant |
| 3456 | BMP10      | -1.01 | 1.38E-01 | NA       | 52.74    | not significant |
| 3457 | PIK3AP1    | -1.01 | 3.69E-01 | 6.33E-01 | 162.82   | not significant |
| 3458 | TADA2A     | -1.01 | 5.06E-01 | 7.40E-01 | 784.69   | not significant |
| 3459 | KBTD6      | -1.01 | 5.06E-01 | 7.40E-01 | 763.15   | not significant |
| 3460 | EML4       | -1.01 | 4.83E-01 | 7.24E-01 | 2684.70  | not significant |
| 3461 | DSCR9      | -1.01 | 6.19E-02 | NA       | 27.58    | not significant |
| 3462 | DCAF4L1    | -1.01 | 1.03E-01 | NA       | 34.38    | not significant |
| 3463 | DUSP4      | -1.01 | 2.91E-01 | NA       | 91.09    | not significant |
| 3464 | PIAS3      | -1.01 | 3.51E-01 | 6.18E-01 | 133.20   | not significant |
| 3465 | RBMS2      | -1.01 | 4.89E-01 | 7.28E-01 | 423.61   | not significant |
| 3466 | ALAD       | -1.01 | 5.11E-01 | 7.44E-01 | 897.81   | not significant |
| 3467 | THAP6      | -1.01 | 5.05E-01 | 7.39E-01 | 500.86   | not significant |
| 3468 | SLMO2      | -1.01 | 5.01E-01 | 7.37E-01 | 2668.81  | not significant |
| 3469 | NDC80      | -1.01 | 4.98E-01 | 7.35E-01 | 2043.94  | not significant |
| 3470 | CDCA4      | -1.01 | 4.99E-01 | 7.36E-01 | 2310.31  | not significant |
| 3471 | SMC1A      | -1.01 | 4.75E-01 | 7.17E-01 | 3711.34  | not significant |
| 3472 | TAF4       | -1.01 | 4.99E-01 | 7.36E-01 | 2091.33  | not significant |
| 3473 | ATP7A      | -1.01 | 3.13E-01 | 5.84E-01 | 105.08   | not significant |
| 3474 | AOC2       | -1.01 | 1.41E-01 | NA       | 46.81    | not significant |
| 3475 | DHRS4L2    | -1.01 | 4.80E-01 | 7.21E-01 | 525.28   | not significant |
| 3476 | FKBP15     | -1.01 | 5.13E-01 | 7.45E-01 | 996.44   | not significant |
| 3477 | CAPG       | -1.01 | 4.87E-01 | 7.26E-01 | 4670.81  | not significant |
| 3478 | HDFG       | -1.01 | 4.40E-01 | 6.92E-01 | 9708.82  | not significant |
| 3479 | UBE2N      | -1.01 | 4.32E-01 | 6.86E-01 | 8378.31  | not significant |
| 3480 | GNA12      | -1.01 | 5.50E-01 | 7.70E-01 | 2664.23  | not significant |
| 3481 | NUBPL      | -1.01 | 4.42E-01 | 6.93E-01 | 294.17   | not significant |
| 3482 | PSMB3      | -1.01 | 4.78E-01 | 7.20E-01 | 4594.94  | not significant |
| 3483 | C8orf59    | -1.01 | 5.15E-01 | 7.46E-01 | 1602.88  | not significant |
| 3484 | ZNF561     | -1.01 | 5.11E-01 | 7.44E-01 | 744.41   | not significant |
| 3485 | CYB5D1     | -1.01 | 5.14E-01 | 7.46E-01 | 793.03   | not significant |
| 3486 | ZNF329     | -1.01 | 5.12E-01 | 7.45E-01 | 705.79   | not significant |
| 3487 | ATP5O      | -1.01 | 5.38E-01 | 7.61E-01 | 4437.36  | not significant |
| 3488 | ZNF92      | -1.01 | 5.09E-01 | 7.43E-01 | 2052.59  | not significant |
| 3489 | PDP1       | -1.01 | 5.04E-01 | 7.39E-01 | 1735.95  | not significant |
| 3490 | AP1M1      | -1.01 | 4.73E-01 | 7.16E-01 | 3877.70  | not significant |
| 3491 | UPF1       | -1.01 | 4.17E-01 | 6.73E-01 | 11801.79 | not significant |
| 3492 | HIST1H2BC  | -1.01 | 1.08E-01 | NA       | 35.26    | not significant |
| 3493 | ZFYVE9     | -1.01 | 3.82E-01 | 6.45E-01 | 150.88   | not significant |
| 3494 | UNC45A     | -1.01 | 5.00E-01 | 7.36E-01 | 2380.35  | not significant |
| 3495 | NRP1       | -1.01 | 9.00E-02 | NA       | 30.63    | not significant |
| 3496 | TUBB2A     | -1.01 | 2.27E-01 | NA       | 66.34    | not significant |
| 3497 | BBS5       | -1.01 | 4.38E-01 | 6.90E-01 | 278.64   | not significant |
| 3498 | GRAP       | -1.01 | 5.00E-01 | 7.36E-01 | 1171.16  | not significant |
| 3499 | NDUFAF7    | -1.01 | 5.14E-01 | 7.46E-01 | 599.49   | not significant |
| 3500 | EXOG       | -1.01 | 5.10E-01 | 7.44E-01 | 609.79   | not significant |
| 3501 | CDKN2AIPNL | -1.01 | 5.21E-01 | 7.51E-01 | 1099.38  | not significant |
| 3502 | NSMCE2     | -1.01 | 5.32E-01 | 7.58E-01 | 745.18   | not significant |
| 3503 | PDHX       | -1.01 | 5.21E-01 | 7.51E-01 | 998.53   | not significant |
| 3504 | RPS6KC1    | -1.01 | 5.10E-01 | 7.44E-01 | 588.39   | not significant |
| 3505 | NABP2      | -1.01 | 5.02E-01 | 7.38E-01 | 2972.04  | not significant |
| 3506 | SPTLC1     | -1.01 | 5.16E-01 | 7.47E-01 | 1457.73  | not significant |
| 3507 | TRA2A      | -1.01 | 4.72E-01 | 7.15E-01 | 3339.73  | not significant |

|      |              |       |          |          |          |                 |
|------|--------------|-------|----------|----------|----------|-----------------|
| 3508 | INTS7        | -1.01 | 4.85E-01 | 7.26E-01 | 3016.25  | not significant |
| 3509 | OTULIN       | -1.01 | 5.03E-01 | 7.39E-01 | 2603.51  | not significant |
| 3510 | ZBTB7A       | -1.01 | 5.41E-01 | 7.63E-01 | 1722.37  | not significant |
| 3511 | ILF3         | -1.01 | 3.91E-01 | 6.52E-01 | 28041.52 | not significant |
| 3512 | PRKCE        | -1.01 | 4.53E-01 | 7.02E-01 | 6095.30  | not significant |
| 3513 | GRASP        | -1.01 | 1.50E-01 | NA       | 45.34    | not significant |
| 3514 | DDX6         | -1.01 | 4.61E-01 | 7.07E-01 | 1765.36  | not significant |
| 3515 | RPL26L1      | -1.01 | 5.10E-01 | 7.44E-01 | 629.94   | not significant |
| 3516 | STRADB       | -1.01 | 5.13E-01 | 7.45E-01 | 507.62   | not significant |
| 3517 | ARL8A        | -1.01 | 5.20E-01 | 7.50E-01 | 1043.42  | not significant |
| 3518 | AP1AR        | -1.01 | 5.19E-01 | 7.49E-01 | 1316.53  | not significant |
| 3519 | CEP85        | -1.01 | 5.07E-01 | 7.41E-01 | 2690.18  | not significant |
| 3520 | MSI2         | -1.01 | 4.94E-01 | 7.32E-01 | 5374.13  | not significant |
| 3521 | ANLN         | -1.01 | 4.82E-01 | 7.23E-01 | 3313.85  | not significant |
| 3522 | CSF2         | -1.01 | 1.62E-02 | NA       | 15.49    | not significant |
| 3523 | LOC103611081 | -1.01 | 4.46E-01 | 6.96E-01 | 240.52   | not significant |
| 3524 | PARD6A       | -1.01 | 4.15E-01 | 6.72E-01 | 282.58   | not significant |
| 3525 | RGP1         | -1.01 | 4.73E-01 | 7.16E-01 | 322.26   | not significant |
| 3526 | PRMT9        | -1.01 | 5.06E-01 | 7.40E-01 | 450.23   | not significant |
| 3527 | TMEM11       | -1.01 | 5.17E-01 | 7.47E-01 | 653.31   | not significant |
| 3528 | UBXN2A       | -1.01 | 5.18E-01 | 7.48E-01 | 1036.27  | not significant |
| 3529 | NCK1PSD      | -1.01 | 5.21E-01 | 7.51E-01 | 1025.97  | not significant |
| 3530 | RABGGTB      | -1.01 | 5.02E-01 | 7.38E-01 | 2549.99  | not significant |
| 3531 | EPST11       | -1.01 | 4.94E-01 | 7.32E-01 | 3459.85  | not significant |
| 3532 | EHBP1        | -1.01 | 5.23E-01 | 7.52E-01 | 1032.89  | not significant |
| 3533 | HHIP         | -1.01 | 5.07E-01 | 7.42E-01 | 1976.47  | not significant |
| 3534 | HECTD3       | -1.01 | 5.22E-01 | 7.51E-01 | 1181.31  | not significant |
| 3535 | LONP1        | -1.01 | 4.70E-01 | 7.14E-01 | 5203.53  | not significant |
| 3536 | CNBP         | -1.01 | 4.52E-01 | 7.01E-01 | 15065.37 | not significant |
| 3537 | FERMT3       | -1.01 | 4.31E-01 | 6.85E-01 | 7231.17  | not significant |
| 3538 | C9orf172     | -1.01 | 4.33E-02 | NA       | 20.72    | not significant |
| 3539 | FSD1         | -1.01 | 4.81E-01 | 7.22E-01 | 313.47   | not significant |
| 3540 | C11orf24     | -1.01 | 4.94E-01 | 7.32E-01 | 379.93   | not significant |
| 3541 | CHD9         | -1.01 | 5.28E-01 | 7.56E-01 | 3222.55  | not significant |
| 3542 | C4orf33      | -1.01 | 5.04E-01 | 7.39E-01 | 447.81   | not significant |
| 3543 | BCL2L12      | -1.01 | 5.28E-01 | 7.55E-01 | 1186.32  | not significant |
| 3544 | EPB41L5      | -1.01 | 5.21E-01 | 7.51E-01 | 764.02   | not significant |
| 3545 | THOC1        | -1.01 | 5.16E-01 | 7.47E-01 | 1912.03  | not significant |
| 3546 | GNB2         | -1.01 | 4.77E-01 | 7.19E-01 | 6090.01  | not significant |
| 3547 | RASGRP2      | -1.01 | 5.22E-01 | 7.51E-01 | 1294.77  | not significant |
| 3548 | PEX7         | -1.01 | 4.01E-01 | 6.60E-01 | 179.76   | not significant |
| 3549 | ACY3         | -1.01 | 3.78E-01 | 6.43E-01 | 138.05   | not significant |
| 3550 | PVT1         | -1.01 | 4.42E-01 | 6.93E-01 | 226.52   | not significant |
| 3551 | ARHGAP10     | -1.01 | 4.72E-01 | 7.15E-01 | 289.34   | not significant |
| 3552 | ADAL         | -1.01 | 4.99E-01 | 7.36E-01 | 483.25   | not significant |
| 3553 | SNX30        | -1.01 | 4.55E-01 | 7.04E-01 | 273.25   | not significant |
| 3554 | ZNF621       | -1.01 | 4.99E-01 | 7.36E-01 | 417.85   | not significant |
| 3555 | CCDC91       | -1.01 | 5.25E-01 | 7.53E-01 | 1245.71  | not significant |
| 3556 | YTHDF1       | -1.01 | 4.94E-01 | 7.33E-01 | 3045.26  | not significant |
| 3557 | MYH10        | -1.01 | 5.09E-01 | 7.43E-01 | 2597.12  | not significant |
| 3558 | LINC00116    | -1.01 | 4.18E-01 | 6.73E-01 | 191.72   | not significant |
| 3559 | C19orf12     | -1.01 | 5.26E-01 | 7.54E-01 | 772.32   | not significant |
| 3560 | CIB1         | -1.01 | 5.14E-01 | 7.46E-01 | 2932.02  | not significant |
| 3561 | SCP2         | -1.01 | 4.88E-01 | 7.28E-01 | 3251.34  | not significant |
| 3562 | FNBP4        | -1.01 | 5.13E-01 | 7.45E-01 | 3541.43  | not significant |
| 3563 | SETD1A       | -1.01 | 5.00E-01 | 7.36E-01 | 3858.24  | not significant |
| 3564 | ZMYND10      | -1.01 | 5.28E-02 | NA       | 22.89    | not significant |
| 3565 | C17orf51     | -1.01 | 8.53E-02 | NA       | 30.16    | not significant |
| 3566 | EXOSC4       | -1.01 | 2.82E-01 | NA       | 90.72    | not significant |
| 3567 | CBWD6        | -1.01 | 1.04E-01 | NA       | 34.40    | not significant |
| 3568 | GCSHP3       | -1.01 | 3.84E-01 | 6.47E-01 | 160.21   | not significant |
| 3569 | SWI5         | -1.01 | 4.60E-01 | 7.07E-01 | 278.96   | not significant |
| 3570 | RPUSD2       | -1.01 | 5.15E-01 | 7.46E-01 | 498.54   | not significant |
| 3571 | URGCP        | -1.01 | 5.31E-01 | 7.57E-01 | 1211.11  | not significant |
| 3572 | UBE2W        | -1.01 | 5.30E-01 | 7.57E-01 | 1184.88  | not significant |
| 3573 | NEK4         | -1.01 | 5.29E-01 | 7.56E-01 | 1238.54  | not significant |
| 3574 | PPP3CB       | -1.01 | 5.21E-01 | 7.51E-01 | 1638.71  | not significant |
| 3575 | ZNF236       | -1.01 | 5.22E-01 | 7.51E-01 | 1246.62  | not significant |
| 3576 | BNIP2        | -1.01 | 5.10E-01 | 7.44E-01 | 2572.39  | not significant |
| 3577 | REPS1        | -1.01 | 5.06E-01 | 7.40E-01 | 2429.19  | not significant |
| 3578 | ARFGAP1      | -1.01 | 4.82E-01 | 7.22E-01 | 3851.99  | not significant |
| 3579 | TTC30A       | -1.01 | 2.30E-01 | NA       | 66.66    | not significant |
| 3580 | ZNF408       | -1.01 | 4.96E-01 | 7.33E-01 | 507.55   | not significant |
| 3581 | HELQ         | -1.01 | 5.28E-01 | 7.55E-01 | 532.94   | not significant |
| 3582 | RGPD3        | -1.01 | 5.26E-01 | 7.54E-01 | 548.71   | not significant |
| 3583 | MFSD9        | -1.01 | 5.25E-01 | 7.54E-01 | 550.48   | not significant |
| 3584 | POP5         | -1.01 | 5.34E-01 | 7.59E-01 | 968.97   | not significant |
| 3585 | PRPF18       | -1.01 | 5.32E-01 | 7.58E-01 | 882.26   | not significant |
| 3586 | POP7         | -1.01 | 5.34E-01 | 7.59E-01 | 1668.76  | not significant |
| 3587 | BMS1P20      | -1.01 | 5.32E-01 | 7.58E-01 | 920.91   | not significant |
| 3588 | RPL12        | -1.01 | 5.09E-01 | 7.43E-01 | 13159.91 | not significant |
| 3589 | FAM102B      | -1.01 | 5.08E-01 | 7.43E-01 | 2469.49  | not significant |
| 3590 | CCP110       | -1.01 | 5.06E-01 | 7.40E-01 | 4402.94  | not significant |
| 3591 | WDR92        | -1.01 | 5.20E-01 | 7.50E-01 | 559.33   | not significant |
| 3592 | PIGH         | -1.01 | 5.34E-01 | 7.59E-01 | 957.22   | not significant |
| 3593 | CNIH4        | -1.01 | 5.34E-01 | 7.59E-01 | 780.46   | not significant |
| 3594 | MAPK9        | -1.01 | 5.14E-01 | 7.46E-01 | 2531.63  | not significant |
| 3595 | TRPM7        | -1.01 | 5.12E-01 | 7.44E-01 | 4930.46  | not significant |

|      |              |       |          |          |          |                 |
|------|--------------|-------|----------|----------|----------|-----------------|
| 3596 | PIM2         | -1.01 | 1.65E-01 | NA       | 43.35    | not significant |
| 3597 | ABCD1        | -1.01 | 3.19E-01 | NA       | 97.45    | not significant |
| 3598 | PEX3         | -1.01 | 3.12E-01 | 5.84E-01 | 464.05   | not significant |
| 3599 | RND3         | -1.01 | 4.87E-01 | 7.26E-01 | 308.02   | not significant |
| 3600 | MMAA         | -1.01 | 4.98E-01 | 7.35E-01 | 409.02   | not significant |
| 3601 | NME7         | -1.01 | 5.26E-01 | 7.54E-01 | 492.67   | not significant |
| 3602 | COG2         | -1.01 | 5.37E-01 | 7.61E-01 | 1377.50  | not significant |
| 3603 | KIAA0907     | -1.01 | 5.23E-01 | 7.52E-01 | 2312.85  | not significant |
| 3604 | SMNDC1       | -1.01 | 5.17E-01 | 7.47E-01 | 2462.89  | not significant |
| 3605 | SIPA1L1      | -1.01 | 5.65E-01 | 7.80E-01 | 1534.73  | not significant |
| 3606 | FAM49B       | -1.01 | 4.38E-01 | 6.90E-01 | 10348.96 | not significant |
| 3607 | KLHL13       | -1.01 | 3.38E-01 | 6.06E-01 | 114.57   | not significant |
| 3608 | KLLN         | -1.01 | 4.62E-01 | 7.09E-01 | 246.94   | not significant |
| 3609 | PLBD2        | -1.01 | 5.70E-01 | 7.83E-01 | 234.80   | not significant |
| 3610 | MPP1         | -1.01 | 5.37E-01 | 7.61E-01 | 779.21   | not significant |
| 3611 | LZIC         | -1.01 | 5.40E-01 | 7.63E-01 | 1078.95  | not significant |
| 3612 | TRAPPC13     | -1.01 | 5.40E-01 | 7.63E-01 | 1206.94  | not significant |
| 3613 | APOL3        | -1.01 | 5.39E-01 | 7.62E-01 | 1230.09  | not significant |
| 3614 | ANAPC7       | -1.01 | 5.04E-01 | 7.39E-01 | 4350.68  | not significant |
| 3615 | SNX3         | -1.01 | 5.03E-01 | 7.38E-01 | 4078.17  | not significant |
| 3616 | BRD4         | -1.01 | 5.12E-01 | 7.44E-01 | 4626.02  | not significant |
| 3617 | DOCK2        | -1.01 | 4.74E-01 | 7.17E-01 | 12026.06 | not significant |
| 3618 | STAU1        | -1.01 | 4.86E-01 | 7.26E-01 | 4518.12  | not significant |
| 3619 | LOC101927550 | -1.01 | 2.27E-01 | NA       | 61.54    | not significant |
| 3620 | ANKRD49      | -1.01 | 5.40E-01 | 7.63E-01 | 782.51   | not significant |
| 3621 | VPS9D1-AS1   | -1.01 | 5.15E-01 | 7.46E-01 | 556.16   | not significant |
| 3622 | CEP162       | -1.01 | 5.35E-01 | 7.60E-01 | 508.38   | not significant |
| 3623 | C4orf27      | -1.01 | 5.39E-01 | 7.62E-01 | 1336.34  | not significant |
| 3624 | TMEM126B     | -1.01 | 5.43E-01 | 7.64E-01 | 1197.93  | not significant |
| 3625 | ACAD9        | -1.01 | 5.36E-01 | 7.61E-01 | 1911.32  | not significant |
| 3626 | CIAO1        | -1.01 | 5.03E-01 | 7.38E-01 | 4267.83  | not significant |
| 3627 | ZNF658       | -1.01 | 2.24E-01 | NA       | 63.88    | not significant |
| 3628 | TPK1         | -1.01 | 3.20E-01 | NA       | 87.93    | not significant |
| 3629 | PAXIP1OS     | -1.01 | 4.91E-01 | 7.30E-01 | 322.85   | not significant |
| 3630 | NDUFV2       | -1.01 | 5.38E-01 | 7.62E-01 | 2668.96  | not significant |
| 3631 | ACAT1        | -1.01 | 5.40E-01 | 7.63E-01 | 1432.68  | not significant |
| 3632 | LYPLA1       | -1.01 | 5.30E-01 | 7.56E-01 | 4006.35  | not significant |
| 3633 | CASP8AP2     | -1.01 | 5.17E-01 | 7.47E-01 | 3840.35  | not significant |
| 3634 | COPB2        | -1.01 | 5.01E-01 | 7.37E-01 | 4892.58  | not significant |
| 3635 | MRM1         | -1.01 | 2.95E-01 | NA       | 95.68    | not significant |
| 3636 | PIGF         | -1.01 | 4.91E-01 | 7.30E-01 | 443.79   | not significant |
| 3637 | BTBD9        | -1.01 | 5.24E-01 | 7.52E-01 | 442.19   | not significant |
| 3638 | FAM69A       | -1.01 | 5.62E-01 | 7.78E-01 | 679.33   | not significant |
| 3639 | MAEA         | -1.01 | 5.27E-01 | 7.54E-01 | 2444.93  | not significant |
| 3640 | STK3         | -1.01 | 5.45E-01 | 7.66E-01 | 1079.20  | not significant |
| 3641 | NDEL1        | -1.01 | 5.45E-01 | 7.65E-01 | 1279.45  | not significant |
| 3642 | NMT1         | -1.01 | 4.74E-01 | 7.17E-01 | 6378.01  | not significant |
| 3643 | LYPD3        | -1.01 | 7.44E-02 | NA       | 25.01    | not significant |
| 3644 | LOC100294362 | -1.01 | 5.58E-02 | NA       | 22.61    | not significant |
| 3645 | PCSK5        | -1.01 | 3.48E-01 | 6.15E-01 | 106.88   | not significant |
| 3646 | DPH5         | -1.01 | 5.48E-01 | 7.68E-01 | 1174.58  | not significant |
| 3647 | C19orf53     | -1.01 | 5.36E-01 | 7.61E-01 | 2979.04  | not significant |
| 3648 | ZNF195       | -1.01 | 5.46E-01 | 7.67E-01 | 1491.68  | not significant |
| 3649 | SLC39A1      | -1.01 | 5.08E-01 | 7.43E-01 | 3138.30  | not significant |
| 3650 | NELFCD       | -1.01 | 5.26E-01 | 7.54E-01 | 2860.79  | not significant |
| 3651 | ADNP2        | -1.01 | 2.12E-01 | NA       | 23.52    | not significant |
| 3652 | IKBKKG       | -1.01 | 3.62E-01 | 6.26E-01 | 114.83   | not significant |
| 3653 | NLGN3        | -1.01 | 3.14E-01 | NA       | 92.24    | not significant |
| 3654 | LOC100506730 | -1.01 | 4.04E-01 | 6.63E-01 | 128.15   | not significant |
| 3655 | FAM57A       | -1.01 | 4.89E-01 | 7.28E-01 | 304.91   | not significant |
| 3656 | NOL12        | -1.01 | 5.47E-01 | 7.67E-01 | 1228.97  | not significant |
| 3657 | OGFR         | -1.01 | 5.40E-01 | 7.63E-01 | 2764.04  | not significant |
| 3658 | ANGEL2       | -1.01 | 5.49E-01 | 7.69E-01 | 1383.13  | not significant |
| 3659 | DNAJC3       | -1.01 | 5.41E-01 | 7.63E-01 | 2904.25  | not significant |
| 3660 | GYS1         | -1.01 | 5.48E-01 | 7.68E-01 | 1909.66  | not significant |
| 3661 | ZC3HC1       | -1.01 | 5.44E-01 | 7.65E-01 | 907.67   | not significant |
| 3662 | GNPDA2       | -1.01 | 5.27E-01 | 7.55E-01 | 421.05   | not significant |
| 3663 | DIAPH2       | -1.01 | 5.43E-01 | 7.64E-01 | 838.62   | not significant |
| 3664 | TIMM22       | -1.01 | 5.54E-01 | 7.72E-01 | 949.06   | not significant |
| 3665 | RIC8B        | -1.01 | 5.52E-01 | 7.71E-01 | 1249.42  | not significant |
| 3666 | APIP         | -1.01 | 5.51E-01 | 7.71E-01 | 1292.47  | not significant |
| 3667 | UFC1         | -1.01 | 5.47E-01 | 7.67E-01 | 2043.03  | not significant |
| 3668 | ERCC6L2      | -1.01 | 5.52E-01 | 7.71E-01 | 1113.43  | not significant |
| 3669 | VAR52        | -1.01 | 5.51E-01 | 7.70E-01 | 1398.77  | not significant |
| 3670 | GON4L        | -1.01 | 5.56E-01 | 7.74E-01 | 1843.22  | not significant |
| 3671 | PXYLP1       | -1.01 | 5.33E-01 | 7.59E-01 | 2479.70  | not significant |
| 3672 | SP2          | -1.01 | 5.51E-01 | 7.71E-01 | 1306.07  | not significant |
| 3673 | SOD1         | -1.01 | 5.21E-01 | 7.51E-01 | 7857.79  | not significant |
| 3674 | PITRM1-AS1   | -1.01 | 1.72E-01 | NA       | 42.65    | not significant |
| 3675 | ZNF583       | -1.01 | 3.78E-01 | 6.43E-01 | 265.35   | not significant |
| 3676 | PINK1        | -1.01 | 4.93E-01 | 7.32E-01 | 296.43   | not significant |
| 3677 | LINC01260    | -1.01 | 5.79E-01 | 7.88E-01 | 733.55   | not significant |
| 3678 | SLIRP        | -1.01 | 5.44E-01 | 7.65E-01 | 980.19   | not significant |
| 3679 | ELP5         | -1.01 | 5.44E-01 | 7.65E-01 | 2757.73  | not significant |
| 3680 | AP2A2        | -1.01 | 5.54E-01 | 7.72E-01 | 1347.94  | not significant |
| 3681 | MTPAP        | -1.01 | 5.54E-01 | 7.72E-01 | 1555.96  | not significant |
| 3682 | CALR         | -1.01 | 4.44E-01 | 6.95E-01 | 51588.53 | not significant |
| 3683 | TFEB         | -1.01 | 5.09E-01 | 7.43E-01 | 295.38   | not significant |

|      |           |       |          |          |           |                 |
|------|-----------|-------|----------|----------|-----------|-----------------|
| 3684 | DECR2     | -1.01 | 5.29E-01 | 7.56E-01 | 390.20    | not significant |
| 3685 | MRPL41    | -1.01 | 5.35E-01 | 7.61E-01 | 629.56    | not significant |
| 3686 | TIMM9     | -1.01 | 5.60E-01 | 7.77E-01 | 1158.64   | not significant |
| 3687 | PBK       | -1.01 | 5.39E-01 | 7.62E-01 | 2326.53   | not significant |
| 3688 | NOTCH2    | -1.01 | 5.59E-01 | 7.77E-01 | 2841.75   | not significant |
| 3689 | TOPBP1    | -1.01 | 4.91E-01 | 7.30E-01 | 8819.68   | not significant |
| 3690 | FAM189B   | -1.01 | 5.37E-01 | 7.61E-01 | 441.46    | not significant |
| 3691 | FARP2     | -1.01 | 5.03E-01 | 7.38E-01 | 292.76    | not significant |
| 3692 | PDIA5     | -1.01 | 5.59E-01 | 7.76E-01 | 986.11    | not significant |
| 3693 | UGGT1     | -1.01 | 5.32E-01 | 7.58E-01 | 6590.18   | not significant |
| 3694 | RBM23     | -1.01 | 5.24E-01 | 7.52E-01 | 2909.89   | not significant |
| 3695 | UBXN2B    | -1.01 | 5.58E-01 | 7.76E-01 | 2003.67   | not significant |
| 3696 | SPRYD7    | -1.01 | 3.58E-01 | 6.23E-01 | 107.46    | not significant |
| 3697 | ACER3     | -1.01 | 4.14E-01 | 6.72E-01 | 153.66    | not significant |
| 3698 | DUSP18    | -1.01 | 4.56E-01 | 7.04E-01 | 185.94    | not significant |
| 3699 | EXOC6B    | -1.01 | 4.84E-01 | 7.24E-01 | 305.12    | not significant |
| 3700 | CPEB4     | -1.01 | 5.34E-01 | 7.59E-01 | 466.32    | not significant |
| 3701 | RPL38     | -1.01 | 6.18E-01 | 8.14E-01 | 13679.04  | not significant |
| 3702 | NEDD8     | -1.01 | 5.59E-01 | 7.77E-01 | 1869.75   | not significant |
| 3703 | CCDC186   | -1.01 | 5.32E-01 | 7.58E-01 | 555.50    | not significant |
| 3704 | FBXL14    | -1.01 | 5.59E-01 | 7.77E-01 | 1083.38   | not significant |
| 3705 | GPATCH2L  | -1.01 | 5.60E-01 | 7.77E-01 | 1874.89   | not significant |
| 3706 | ASNSD1    | -1.01 | 5.43E-01 | 7.64E-01 | 2572.51   | not significant |
| 3707 | NCOA4     | -1.01 | 5.59E-01 | 7.77E-01 | 1357.82   | not significant |
| 3708 | POLD2     | -1.01 | 5.26E-01 | 7.54E-01 | 6608.95   | not significant |
| 3709 | ACTB      | -1.01 | 4.64E-01 | 7.11E-01 | 184351.29 | not significant |
| 3710 | POLDIP3   | -1.01 | 5.07E-01 | 7.41E-01 | 4882.02   | not significant |
| 3711 | PEX19     | -1.01 | 5.50E-01 | 7.70E-01 | 2099.04   | not significant |
| 3712 | PBRM1     | -1.01 | 5.25E-01 | 7.54E-01 | 8124.53   | not significant |
| 3713 | ADAMTS1   | -1.01 | 5.27E-01 | 7.55E-01 | 4159.94   | not significant |
| 3714 | ANKRD28   | -1.01 | 5.05E-01 | 7.39E-01 | 6331.62   | not significant |
| 3715 | MYH9      | -1.01 | 5.28E-01 | 7.56E-01 | 23816.23  | not significant |
| 3716 | IL10RA    | -1.01 | 1.33E-01 | NA       | 31.54     | not significant |
| 3717 | PRR29     | -1.01 | 2.21E-01 | NA       | 62.47     | not significant |
| 3718 | IL18R1    | -1.01 | 3.12E-01 | NA       | 81.46     | not significant |
| 3719 | NMB       | -1.01 | 3.18E-01 | NA       | 90.22     | not significant |
| 3720 | TRIM71    | -1.01 | 4.17E-01 | 6.73E-01 | 152.77    | not significant |
| 3721 | FKBP7     | -1.01 | 4.99E-01 | 7.36E-01 | 257.95    | not significant |
| 3722 | PMVK      | -1.01 | 5.66E-01 | 7.81E-01 | 1278.37   | not significant |
| 3723 | RPE       | -1.01 | 5.43E-01 | 7.64E-01 | 1652.64   | not significant |
| 3724 | RAB3GAP2  | -1.01 | 5.52E-01 | 7.71E-01 | 2604.19   | not significant |
| 3725 | ZSCAN30   | -1.01 | 5.41E-01 | 7.63E-01 | 423.60    | not significant |
| 3726 | SUPV3L1   | -1.01 | 5.63E-01 | 7.79E-01 | 1595.65   | not significant |
| 3727 | PIAS2     | -1.01 | 5.65E-01 | 7.80E-01 | 1143.26   | not significant |
| 3728 | INPP4A    | -1.01 | 5.66E-01 | 7.81E-01 | 2329.13   | not significant |
| 3729 | NEDD1     | -1.01 | 5.03E-01 | 7.38E-01 | 3843.91   | not significant |
| 3730 | LOC643387 | -1.01 | 1.43E-02 | NA       | 12.60     | not significant |
| 3731 | ZNF699    | -1.01 | 3.42E-01 | NA       | 97.11     | not significant |
| 3732 | NHP2L1    | -1.01 | 3.31E-01 | 5.98E-01 | 5443.66   | not significant |
| 3733 | SIGLEC12  | -1.01 | 5.41E-01 | 7.63E-01 | 388.04    | not significant |
| 3734 | ACBD6     | -1.01 | 5.68E-01 | 7.82E-01 | 1697.75   | not significant |
| 3735 | APOL2     | -1.01 | 5.61E-01 | 7.78E-01 | 1815.87   | not significant |
| 3736 | FRYL      | -1.01 | 5.57E-01 | 7.75E-01 | 4758.46   | not significant |
| 3737 | ZFAND3    | -1.01 | 5.44E-01 | 7.65E-01 | 2568.31   | not significant |
| 3738 | GNB1L     | -1.01 | 5.67E-01 | 7.81E-01 | 698.64    | not significant |
| 3739 | ZNF529    | -1.01 | 5.68E-01 | 7.82E-01 | 952.11    | not significant |
| 3740 | BLOC1S3   | -1.01 | 6.80E-01 | 8.50E-01 | 364.87    | not significant |
| 3741 | MANEA     | -1.01 | 5.71E-01 | 7.83E-01 | 2045.64   | not significant |
| 3742 | LDHB      | -1.01 | 5.21E-01 | 7.51E-01 | 29528.64  | not significant |
| 3743 | GUCA1B    | -1.01 | 2.96E-01 | NA       | 68.80     | not significant |
| 3744 | ZNF575    | -1.01 | 3.82E-01 | 6.45E-01 | 119.68    | not significant |
| 3745 | SSSCA1    | -1.01 | 5.70E-01 | 7.83E-01 | 872.69    | not significant |
| 3746 | DCTN3     | -1.01 | 5.67E-01 | 7.81E-01 | 1477.24   | not significant |
| 3747 | RGL4      | -1.01 | 5.73E-01 | 7.84E-01 | 1124.99   | not significant |
| 3748 | TIAM1     | -1.01 | 5.71E-01 | 7.83E-01 | 758.93    | not significant |
| 3749 | ZNF746    | -1.01 | 5.73E-01 | 7.84E-01 | 1179.54   | not significant |
| 3750 | CENPBD1P1 | -1.01 | 5.72E-01 | 7.83E-01 | 1196.76   | not significant |
| 3751 | DDHD2     | -1.01 | 5.67E-01 | 7.81E-01 | 2097.11   | not significant |
| 3752 | LMTK2     | -1.01 | 5.71E-01 | 7.83E-01 | 2108.80   | not significant |
| 3753 | ABR       | -1.01 | 5.65E-01 | 7.80E-01 | 1794.10   | not significant |
| 3754 | NPPA-AS1  | -1.01 | 1.50E-01 | NA       | 32.69     | not significant |
| 3755 | LMLN      | -1.01 | 4.43E-01 | 6.94E-01 | 144.09    | not significant |
| 3756 | PGBD1     | -1.01 | 5.23E-01 | 7.52E-01 | 405.88    | not significant |
| 3757 | FAH       | -1.01 | 5.71E-01 | 7.83E-01 | 1056.84   | not significant |
| 3758 | TMEM217   | -1.01 | 5.67E-01 | 7.81E-01 | 468.86    | not significant |
| 3759 | SNX17     | -1.01 | 4.95E-01 | 7.33E-01 | 4648.80   | not significant |
| 3760 | STOM      | -1.01 | 5.75E-01 | 7.86E-01 | 836.28    | not significant |
| 3761 | HDDC2     | -1.01 | 5.69E-01 | 7.83E-01 | 2185.02   | not significant |
| 3762 | RAP1B     | -1.01 | 5.60E-01 | 7.77E-01 | 3307.36   | not significant |
| 3763 | DNAJC5    | -1.01 | 5.50E-01 | 7.70E-01 | 3635.58   | not significant |
| 3764 | XPR1      | -1.01 | 5.61E-01 | 7.78E-01 | 2179.49   | not significant |
| 3765 | ZYG11B    | -1.01 | 4.41E-01 | 6.92E-01 | 432.28    | not significant |
| 3766 | TBCE      | -1.01 | 5.75E-01 | 7.86E-01 | 820.08    | not significant |
| 3767 | CNOT7     | -1.01 | 4.85E-01 | 7.26E-01 | 7786.70   | not significant |
| 3768 | GFM1      | -1.01 | 5.54E-01 | 7.72E-01 | 2674.59   | not significant |
| 3769 | ATF6      | -1.01 | 5.52E-01 | 7.71E-01 | 3222.91   | not significant |
| 3770 | TLL13     | -1.01 | 6.80E-03 | NA       | 9.82      | not significant |
| 3771 | MYOM2     | -1.01 | 3.93E-01 | 6.54E-01 | 114.87    | not significant |

|      |              |       |          |          |          |                 |
|------|--------------|-------|----------|----------|----------|-----------------|
| 3772 | PA2G4P4      | -1.01 | 4.50E-01 | 6.99E-01 | 150.45   | not significant |
| 3773 | ST3GAL4-AS1  | -1.01 | 4.07E-01 | 6.65E-01 | 115.92   | not significant |
| 3774 | BCL9         | -1.01 | 4.36E-01 | 6.89E-01 | 144.23   | not significant |
| 3775 | FKBP14       | -1.01 | 5.42E-01 | 7.64E-01 | 372.32   | not significant |
| 3776 | ZDHC16       | -1.01 | 5.76E-01 | 7.86E-01 | 1971.32  | not significant |
| 3777 | EED          | -1.01 | 5.82E-01 | 7.90E-01 | 1476.97  | not significant |
| 3778 | DBT          | -1.01 | 5.80E-01 | 7.89E-01 | 1103.92  | not significant |
| 3779 | TCF12        | -1.01 | 5.43E-01 | 7.64E-01 | 5013.06  | not significant |
| 3780 | EZR          | -1.01 | 4.76E-01 | 7.18E-01 | 15263.54 | not significant |
| 3781 | PIPSL        | -1.01 | 2.26E-01 | NA       | 48.92    | not significant |
| 3782 | ARMC2        | -1.01 | 3.72E-01 | NA       | 93.62    | not significant |
| 3783 | TMEM183A     | -1.01 | 4.44E-01 | 6.95E-01 | 152.58   | not significant |
| 3784 | MTERF2       | -1.01 | 4.25E-01 | 6.79E-01 | 124.34   | not significant |
| 3785 | LOC100996324 | -1.01 | 4.55E-01 | 7.04E-01 | 170.89   | not significant |
| 3786 | ZNF665       | -1.01 | 4.84E-01 | 7.24E-01 | 227.30   | not significant |
| 3787 | TOMM6        | -1.01 | 5.66E-01 | 7.81E-01 | 4777.18  | not significant |
| 3788 | EIF2B5       | -1.01 | 5.59E-01 | 7.77E-01 | 2441.09  | not significant |
| 3789 | VPS41        | -1.01 | 5.73E-01 | 7.84E-01 | 2033.38  | not significant |
| 3790 | ME2          | -1.01 | 5.28E-01 | 7.55E-01 | 5467.25  | not significant |
| 3791 | EFR3A        | -1.01 | 5.48E-01 | 7.68E-01 | 5021.43  | not significant |
| 3792 | TRAPPC4      | -1.01 | 5.10E-01 | 7.44E-01 | 248.29   | not significant |
| 3793 | MYO5C        | -1.01 | 4.79E-01 | 7.21E-01 | 190.60   | not significant |
| 3794 | C9orf156     | -1.01 | 5.44E-01 | 7.65E-01 | 349.86   | not significant |
| 3795 | ACOX3        | -1.01 | 5.64E-01 | 7.80E-01 | 431.54   | not significant |
| 3796 | RAPH1        | -1.01 | 5.39E-01 | 7.62E-01 | 345.62   | not significant |
| 3797 | DTYMK        | -1.01 | 5.71E-01 | 7.83E-01 | 2738.41  | not significant |
| 3798 | PKIA         | -1.01 | 5.76E-01 | 7.87E-01 | 1716.49  | not significant |
| 3799 | MTRR         | -1.01 | 5.75E-01 | 7.86E-01 | 1933.37  | not significant |
| 3800 | FBXW7        | -1.01 | 5.82E-01 | 7.90E-01 | 1474.13  | not significant |
| 3801 | RNF43        | -1.01 | 1.35E-01 | NA       | 29.53    | not significant |
| 3802 | ZNF75A       | -1.01 | 5.51E-01 | 7.71E-01 | 396.15   | not significant |
| 3803 | SHFM1        | -1.01 | 5.91E-01 | 7.97E-01 | 2163.49  | not significant |
| 3804 | FAM129B      | -1.01 | 5.85E-01 | 7.93E-01 | 1397.24  | not significant |
| 3805 | TRAF4        | -1.01 | 5.87E-01 | 7.94E-01 | 1330.23  | not significant |
| 3806 | BROX         | -1.01 | 5.86E-01 | 7.93E-01 | 990.01   | not significant |
| 3807 | XAF1         | -1.01 | 5.91E-01 | 7.97E-01 | 1582.35  | not significant |
| 3808 | PYCR2        | -1.01 | 5.59E-01 | 7.77E-01 | 4595.50  | not significant |
| 3809 | TCEA1        | -1.01 | 5.66E-01 | 7.81E-01 | 2970.00  | not significant |
| 3810 | SNRK-AS1     | -1.01 | 3.62E-02 | NA       | 14.75    | not significant |
| 3811 | RGS2         | -1.01 | 2.81E-01 | NA       | 78.66    | not significant |
| 3812 | ZNF485       | -1.01 | 5.31E-01 | 7.57E-01 | 282.71   | not significant |
| 3813 | PARP12       | -1.01 | 5.77E-01 | 7.87E-01 | 1984.64  | not significant |
| 3814 | FMNL3        | -1.01 | 5.71E-01 | 7.83E-01 | 3149.04  | not significant |
| 3815 | ADD1         | -1.01 | 5.05E-01 | 7.40E-01 | 7467.42  | not significant |
| 3816 | TRAF7        | -1.01 | 5.43E-01 | 7.64E-01 | 4589.21  | not significant |
| 3817 | GPR114       | -1.01 | 1.38E-01 | NA       | 34.40    | not significant |
| 3818 | CORO6        | -1.01 | 2.03E-01 | NA       | 38.07    | not significant |
| 3819 | KMT2D        | -1.01 | 5.17E-01 | 7.47E-01 | 9824.45  | not significant |
| 3820 | RHOBTB3      | -1.01 | 4.64E-01 | 7.11E-01 | 151.15   | not significant |
| 3821 | FAM127B      | -1.01 | 5.46E-01 | 7.67E-01 | 337.46   | not significant |
| 3822 | SPEN         | -1.01 | 5.04E-01 | 7.39E-01 | 8146.57  | not significant |
| 3823 | REEP2        | -1.01 | 5.30E-01 | 7.56E-01 | 271.88   | not significant |
| 3824 | C1GALT1C1    | -1.01 | 5.64E-01 | 7.80E-01 | 411.48   | not significant |
| 3825 | DPY30        | -1.01 | 5.89E-01 | 7.96E-01 | 1094.01  | not significant |
| 3826 | TAP2         | -1.01 | 5.92E-01 | 7.98E-01 | 885.24   | not significant |
| 3827 | NREP         | -1.01 | 5.53E-01 | 7.72E-01 | 3590.15  | not significant |
| 3828 | PTTG1IP      | -1.01 | 5.69E-01 | 7.83E-01 | 2648.32  | not significant |
| 3829 | SPINT1       | -1.01 | 1.53E-01 | NA       | 34.54    | not significant |
| 3830 | DNAJC4       | -1.01 | 5.16E-01 | 7.47E-01 | 219.84   | not significant |
| 3831 | DMTN         | -1.01 | 1.20E-01 | NA       | 25.12    | not significant |
| 3832 | PLCD3        | -1.01 | 4.85E-01 | 7.26E-01 | 176.93   | not significant |
| 3833 | CTTNBP2NL    | -1.01 | 5.17E-01 | 7.47E-01 | 269.88   | not significant |
| 3834 | MED16        | -1.01 | 5.92E-01 | 7.98E-01 | 2460.00  | not significant |
| 3835 | CEBPG        | -1.01 | 5.82E-01 | 7.90E-01 | 2321.00  | not significant |
| 3836 | CTNBL1       | -1.01 | 5.75E-01 | 7.86E-01 | 3244.11  | not significant |
| 3837 | TMEM216      | -1.01 | 4.21E-02 | NA       | 15.55    | not significant |
| 3838 | ZNF618       | -1.01 | 2.18E-01 | NA       | 45.95    | not significant |
| 3839 | ZBTB37       | -1.01 | 4.11E-01 | 6.69E-01 | 107.73   | not significant |
| 3840 | GRAMD3       | -1.01 | 4.00E-01 | NA       | 100.47   | not significant |
| 3841 | ATP5L        | -1.01 | 5.20E-01 | 7.51E-01 | 1866.18  | not significant |
| 3842 | ZNF791       | -1.01 | 4.80E-01 | 7.22E-01 | 399.75   | not significant |
| 3843 | SGMS1        | -1.01 | 5.22E-01 | 7.51E-01 | 261.36   | not significant |
| 3844 | CYSLTR2      | -1.01 | 5.29E-01 | 7.56E-01 | 266.99   | not significant |
| 3845 | NDUFB3       | -1.01 | 5.96E-01 | 8.01E-01 | 1699.02  | not significant |
| 3846 | FAM32A       | -1.01 | 5.85E-01 | 7.93E-01 | 3298.98  | not significant |
| 3847 | ZXDC         | -1.01 | 5.46E-01 | 7.67E-01 | 1137.10  | not significant |
| 3848 | MRPS10       | -1.01 | 5.87E-01 | 7.94E-01 | 2025.20  | not significant |
| 3849 | MFSD5        | -1.01 | 5.97E-01 | 8.02E-01 | 1076.95  | not significant |
| 3850 | LRRC41       | -1.01 | 5.83E-01 | 7.91E-01 | 2648.03  | not significant |
| 3851 | SRCAP        | -1.01 | 5.89E-01 | 7.96E-01 | 7971.51  | not significant |
| 3852 | GPR75        | -1.01 | 3.33E-01 | NA       | 77.59    | not significant |
| 3853 | TRIM36       | -1.01 | 5.22E-01 | 7.51E-01 | 247.28   | not significant |
| 3854 | DENND1A      | -1.01 | 5.97E-01 | 8.02E-01 | 909.04   | not significant |
| 3855 | DNAH1        | -1.01 | 5.73E-01 | 7.84E-01 | 528.86   | not significant |
| 3856 | RSRC1        | -1.01 | 5.97E-01 | 8.02E-01 | 1139.38  | not significant |
| 3857 | ARPC1B       | -1.01 | 5.48E-01 | 7.68E-01 | 7499.34  | not significant |
| 3858 | IRAK4        | -1.01 | 5.77E-01 | 7.87E-01 | 2503.62  | not significant |
| 3859 | PRR7         | -1.01 | 4.34E-01 | 6.88E-01 | 126.69   | not significant |

|      |                |       |          |          |          |                 |
|------|----------------|-------|----------|----------|----------|-----------------|
| 3860 | UBE3D          | -1.01 | 5.00E-01 | 7.36E-01 | 204.45   | not significant |
| 3861 | ABHD14A        | -1.01 | 5.52E-01 | 7.71E-01 | 297.90   | not significant |
| 3862 | HRSP12         | -1.01 | 5.75E-01 | 7.86E-01 | 551.80   | not significant |
| 3863 | TOB1           | -1.01 | 5.73E-01 | 7.84E-01 | 425.22   | not significant |
| 3864 | KAT6A          | -1.01 | 6.47E-01 | 8.32E-01 | 7438.13  | not significant |
| 3865 | YDJC           | -1.01 | 6.01E-01 | 8.02E-01 | 1278.67  | not significant |
| 3866 | ORC4           | -1.01 | 5.99E-01 | 8.02E-01 | 1265.81  | not significant |
| 3867 | CHAC2          | -1.01 | 6.00E-01 | 8.02E-01 | 845.17   | not significant |
| 3868 | MFF            | -1.01 | 5.88E-01 | 7.95E-01 | 2194.86  | not significant |
| 3869 | ALS2           | -1.01 | 6.01E-01 | 8.02E-01 | 1038.44  | not significant |
| 3870 | SUDS3          | -1.01 | 5.64E-01 | 7.80E-01 | 3417.12  | not significant |
| 3871 | SKP2           | -1.01 | 5.72E-01 | 7.83E-01 | 3605.27  | not significant |
| 3872 | RAC2           | -1.01 | 5.49E-01 | 7.69E-01 | 11999.50 | not significant |
| 3873 | IREB2          | -1.01 | 5.63E-01 | 7.79E-01 | 4432.83  | not significant |
| 3874 | NECAB1         | -1.01 | 7.98E-03 | NA       | 9.13     | not significant |
| 3875 | SERPINB8       | -1.01 | 3.17E-01 | NA       | 65.68    | not significant |
| 3876 | IFT22          | -1.01 | 5.89E-01 | 7.96E-01 | 567.94   | not significant |
| 3877 | BATF3          | -1.01 | 6.07E-01 | 8.06E-01 | 960.79   | not significant |
| 3878 | GNGT2          | -1.01 | 5.89E-01 | 7.96E-01 | 526.97   | not significant |
| 3879 | RAB2B          | -1.01 | 6.00E-01 | 8.02E-01 | 972.65   | not significant |
| 3880 | AQP3           | -1.01 | 5.85E-01 | 7.93E-01 | 2930.90  | not significant |
| 3881 | SCAF8          | -1.01 | 5.86E-01 | 7.94E-01 | 3089.33  | not significant |
| 3882 | CSNK2A3        | -1.01 | 3.31E-01 | NA       | 77.04    | not significant |
| 3883 | ACOT9          | -1.01 | 5.28E-01 | 7.55E-01 | 259.97   | not significant |
| 3884 | MYH3           | -1.01 | 4.80E-01 | 7.22E-01 | 168.11   | not significant |
| 3885 | PABPC3         | -1.01 | 4.90E-01 | 7.29E-01 | 190.53   | not significant |
| 3886 | TMEM192        | -1.01 | 5.84E-01 | 7.92E-01 | 444.52   | not significant |
| 3887 | OCIAD2         | -1.01 | 6.04E-01 | 8.04E-01 | 2031.62  | not significant |
| 3888 | CSRP1          | -1.01 | 6.03E-01 | 8.03E-01 | 2489.36  | not significant |
| 3889 | RAD1           | -1.01 | 5.88E-01 | 7.95E-01 | 2433.10  | not significant |
| 3890 | KDM6B          | -1.01 | 6.05E-01 | 8.05E-01 | 1243.78  | not significant |
| 3891 | DNAJC14        | -1.01 | 5.79E-01 | 7.88E-01 | 3308.79  | not significant |
| 3892 | SCARB1         | -1.01 | 6.02E-01 | 8.03E-01 | 1414.82  | not significant |
| 3893 | ACLY           | -1.01 | 5.47E-01 | 7.67E-01 | 6272.13  | not significant |
| 3894 | FITM2          | -1.01 | 1.76E-01 | NA       | 32.54    | not significant |
| 3895 | ATF5           | -1.01 | 5.97E-01 | 8.02E-01 | 596.03   | not significant |
| 3896 | PHF21A         | -1.01 | 6.08E-01 | 8.07E-01 | 879.73   | not significant |
| 3897 | SEPHS1         | -1.01 | 5.68E-01 | 7.82E-01 | 4752.67  | not significant |
| 3898 | FGD1           | -1.01 | 2.40E-01 | NA       | 46.97    | not significant |
| 3899 | TJBA8          | -1.01 | 2.52E-01 | NA       | 43.51    | not significant |
| 3900 | ARMCX5-GPRASP2 | -1.01 | 1.85E-01 | NA       | 33.08    | not significant |
| 3901 | RPL23P8        | -1.01 | 3.08E-01 | NA       | 58.98    | not significant |
| 3902 | PRDM1          | -1.01 | 5.19E-01 | 7.49E-01 | 215.04   | not significant |
| 3903 | ALG11          | -1.01 | 5.02E-01 | 7.38E-01 | 192.57   | not significant |
| 3904 | EXO5           | -1.01 | 6.08E-01 | 8.07E-01 | 754.97   | not significant |
| 3905 | NUDT1          | -1.01 | 6.07E-01 | 8.07E-01 | 2190.20  | not significant |
| 3906 | TRIM38         | -1.01 | 6.07E-01 | 8.07E-01 | 1161.91  | not significant |
| 3907 | CHMP1A         | -1.01 | 5.93E-01 | 7.98E-01 | 3417.99  | not significant |
| 3908 | CDC42SE1       | -1.01 | 5.56E-01 | 7.74E-01 | 3565.08  | not significant |
| 3909 | PALB2          | -1.01 | 6.09E-01 | 8.08E-01 | 1281.24  | not significant |
| 3910 | DNM1L          | -1.01 | 5.91E-01 | 7.97E-01 | 2876.93  | not significant |
| 3911 | ZNF165         | -1.01 | 6.27E-02 | NA       | 16.65    | not significant |
| 3912 | CXCR3          | -1.01 | 9.65E-02 | NA       | 20.83    | not significant |
| 3913 | LINC01465      | -1.01 | 2.32E-02 | NA       | 11.62    | not significant |
| 3914 | NDUFB2-AS1     | -1.01 | 2.48E-01 | NA       | 41.91    | not significant |
| 3915 | GDPD1          | -1.01 | 4.74E-01 | 7.16E-01 | 136.80   | not significant |
| 3916 | NGFRAP1        | -1.01 | 5.83E-01 | 7.91E-01 | 446.23   | not significant |
| 3917 | ZNF470         | -1.01 | 5.72E-01 | 7.83E-01 | 234.66   | not significant |
| 3918 | HEATR5A        | -1.01 | 5.62E-01 | 7.78E-01 | 311.40   | not significant |
| 3919 | CHM            | -1.01 | 6.13E-01 | 8.10E-01 | 869.93   | not significant |
| 3920 | HMGN3          | -1.01 | 6.02E-01 | 8.03E-01 | 3358.54  | not significant |
| 3921 | IKBIP          | -1.01 | 6.11E-01 | 8.09E-01 | 1167.62  | not significant |
| 3922 | ZSCAN32        | -1.01 | 6.12E-01 | 8.09E-01 | 892.98   | not significant |
| 3923 | HEG1           | -1.01 | 6.15E-01 | 8.12E-01 | 1215.28  | not significant |
| 3924 | ARMC6          | -1.01 | 5.96E-01 | 8.01E-01 | 3217.10  | not significant |
| 3925 | KIF15          | -1.01 | 5.79E-01 | 7.88E-01 | 3992.83  | not significant |
| 3926 | ARHGAP35       | -1.01 | 6.03E-01 | 8.03E-01 | 3195.50  | not significant |
| 3927 | SP3            | -1.01 | 6.09E-01 | 8.08E-01 | 4930.37  | not significant |
| 3928 | SATB2          | -1.01 | 3.98E-01 | 6.58E-01 | 108.54   | not significant |
| 3929 | DZANK1         | -1.01 | 4.51E-01 | 7.01E-01 | 119.18   | not significant |
| 3930 | PRDM10         | -1.01 | 6.02E-01 | 8.03E-01 | 721.70   | not significant |
| 3931 | VPS37B         | -1.01 | 5.65E-01 | 7.80E-01 | 3778.35  | not significant |
| 3932 | TMEM131        | -1.01 | 6.16E-01 | 8.13E-01 | 2844.78  | not significant |
| 3933 | BLMH           | -1.01 | 5.98E-01 | 8.02E-01 | 4291.29  | not significant |
| 3934 | RABGAP1        | -1.01 | 6.21E-01 | 8.15E-01 | 1675.88  | not significant |
| 3935 | ARL8B          | -1.01 | 5.79E-01 | 7.88E-01 | 3539.24  | not significant |
| 3936 | DCAF5          | -1.01 | 6.01E-01 | 8.02E-01 | 2285.23  | not significant |
| 3937 | COPS7B         | -1.01 | 5.81E-01 | 7.90E-01 | 3082.03  | not significant |
| 3938 | ZSWIM8-AS1     | -1.01 | 2.03E-01 | NA       | 38.61    | not significant |
| 3939 | ZBTB38         | -1.01 | 1.74E-01 | NA       | 29.34    | not significant |
| 3940 | FAM227A        | -1.01 | 3.14E-01 | NA       | 58.83    | not significant |
| 3941 | PET117         | -1.01 | 4.38E-01 | 6.90E-01 | 109.24   | not significant |
| 3942 | KCNC4          | -1.01 | 5.94E-01 | 7.99E-01 | 428.72   | not significant |
| 3943 | DOHH           | -1.01 | 6.17E-01 | 8.13E-01 | 1345.22  | not significant |
| 3944 | TIGD4          | -1.01 | 3.29E-01 | NA       | 61.10    | not significant |
| 3945 | JOSD2          | -1.01 | 5.72E-01 | 7.83E-01 | 303.43   | not significant |
| 3946 | PCDH18         | -1.01 | 3.24E-01 | NA       | 60.93    | not significant |
| 3947 | TMEM251        | -1.01 | 5.92E-01 | 7.98E-01 | 473.75   | not significant |



|      |             |       |          |          |          |                 |
|------|-------------|-------|----------|----------|----------|-----------------|
| 3948 | NSL1        | -1.01 | 6.12E-01 | 8.10E-01 | 2493.16  | not significant |
| 3949 | NVL         | -1.01 | 6.20E-01 | 8.15E-01 | 1620.12  | not significant |
| 3950 | ECD         | -1.01 | 6.17E-01 | 8.13E-01 | 1248.07  | not significant |
| 3951 | CD6         | -1.01 | 5.69E-01 | 7.83E-01 | 3669.84  | not significant |
| 3952 | KHDRBS1     | -1.01 | 5.28E-01 | 7.55E-01 | 16435.98 | not significant |
| 3953 | SCUBE1      | -1.01 | 5.72E-02 | NA       | 14.59    | not significant |
| 3954 | AHCTF1P1    | -1.01 | 2.52E-01 | NA       | 43.21    | not significant |
| 3955 | ZNF484      | -1.01 | 4.60E-01 | 7.07E-01 | 139.25   | not significant |
| 3956 | FAM212B     | -1.01 | 5.23E-01 | 7.52E-01 | 177.68   | not significant |
| 3957 | USP45       | -1.01 | 6.19E-01 | 8.14E-01 | 709.52   | not significant |
| 3958 | ZCCHC9      | -1.01 | 6.18E-01 | 8.14E-01 | 1425.59  | not significant |
| 3959 | SNX27       | -1.01 | 6.02E-01 | 8.03E-01 | 1396.52  | not significant |
| 3960 | TXNL1       | -1.01 | 6.28E-01 | 8.19E-01 | 3126.17  | not significant |
| 3961 | MKLN1-AS    | -1.01 | 2.35E-01 | NA       | 37.64    | not significant |
| 3962 | NUDT6       | -1.01 | 5.57E-01 | 7.75E-01 | 240.10   | not significant |
| 3963 | ZNF280B     | -1.01 | 5.43E-01 | 7.64E-01 | 244.26   | not significant |
| 3964 | DTWD1       | -1.01 | 5.91E-01 | 7.98E-01 | 352.27   | not significant |
| 3965 | BIRC6       | -1.01 | 5.98E-01 | 8.02E-01 | 5242.66  | not significant |
| 3966 | FAM222A     | -1.01 | 5.79E-01 | 7.88E-01 | 349.73   | not significant |
| 3967 | TTN-AS1     | -1.01 | 5.58E-01 | 7.76E-01 | 261.59   | not significant |
| 3968 | C14orf64    | -1.01 | 5.74E-01 | 7.85E-01 | 318.54   | not significant |
| 3969 | ATXN7L1     | -1.01 | 5.94E-01 | 7.99E-01 | 410.03   | not significant |
| 3970 | ZNF783      | -1.01 | 5.98E-01 | 8.02E-01 | 375.90   | not significant |
| 3971 | METT12A     | -1.01 | 6.27E-01 | 8.18E-01 | 1020.27  | not significant |
| 3972 | C19orf47    | -1.01 | 6.24E-01 | 8.16E-01 | 1148.52  | not significant |
| 3973 | OSGEP       | -1.01 | 6.12E-01 | 8.09E-01 | 2105.49  | not significant |
| 3974 | 43716_7153  | -1.01 | 5.81E-01 | 7.90E-01 | 4398.52  | not significant |
| 3975 | METAP2      | -1.01 | 5.43E-01 | 7.64E-01 | 7043.82  | not significant |
| 3976 | TMOD4       | -1.01 | 1.12E-01 | NA       | 20.53    | not significant |
| 3977 | MED4-AS1    | -1.01 | 8.28E-02 | NA       | 22.11    | not significant |
| 3978 | NINJ1       | -1.01 | 5.70E-01 | 7.83E-01 | 263.19   | not significant |
| 3979 | MCTS2P      | -1.01 | 5.53E-01 | 7.72E-01 | 263.30   | not significant |
| 3980 | MRPL11      | -1.01 | 5.87E-01 | 7.94E-01 | 3638.52  | not significant |
| 3981 | GLDN        | -1.01 | 4.96E-01 | 7.34E-01 | 154.43   | not significant |
| 3982 | MTRF1L      | -1.01 | 6.24E-01 | 8.16E-01 | 1034.80  | not significant |
| 3983 | TTC19       | -1.01 | 6.19E-01 | 8.14E-01 | 2037.69  | not significant |
| 3984 | ZFAND5      | -1.01 | 6.00E-01 | 8.02E-01 | 3014.64  | not significant |
| 3985 | SYNJ2BP     | -1.01 | 6.20E-01 | 8.14E-01 | 1843.69  | not significant |
| 3986 | C6orf62     | -1.01 | 5.62E-01 | 7.78E-01 | 5858.21  | not significant |
| 3987 | CCDC168     | -1.01 | 3.83E-01 | NA       | 73.91    | not significant |
| 3988 | NTRK1       | -1.01 | 4.70E-01 | 7.14E-01 | 118.82   | not significant |
| 3989 | CD226       | -1.01 | 5.14E-01 | 7.46E-01 | 184.38   | not significant |
| 3990 | SLC8A1-AS1  | -1.01 | 5.13E-01 | 7.45E-01 | 155.70   | not significant |
| 3991 | STRA6       | -1.01 | 5.16E-01 | 7.47E-01 | 178.96   | not significant |
| 3992 | ZNF852      | -1.01 | 5.08E-01 | 7.42E-01 | 206.51   | not significant |
| 3993 | TFB1M       | -1.01 | 5.93E-01 | 7.99E-01 | 354.17   | not significant |
| 3994 | GNG4        | -1.01 | 6.25E-01 | 8.17E-01 | 865.90   | not significant |
| 3995 | ZNF701      | -1.01 | 5.99E-01 | 8.02E-01 | 651.02   | not significant |
| 3996 | R3HDM4      | -1.01 | 6.28E-01 | 8.19E-01 | 1288.14  | not significant |
| 3997 | GNA15       | -1.01 | 6.24E-01 | 8.16E-01 | 15298.92 | not significant |
| 3998 | SEN3-EIF4A1 | -1.01 | 4.22E-02 | NA       | 12.05    | not significant |
| 3999 | USH1C       | -1.01 | 2.41E-01 | NA       | 36.99    | not significant |
| 4000 | SFXN3       | -1.01 | 2.92E-01 | NA       | 52.06    | not significant |
| 4001 | STON2       | -1.01 | 3.68E-01 | NA       | 63.51    | not significant |
| 4002 | FAM171B     | -1.01 | 2.05E-01 | NA       | 33.45    | not significant |
| 4003 | DOCK4       | -1.01 | 3.43E-01 | NA       | 59.96    | not significant |
| 4004 | RGS12       | -1.01 | 2.07E-01 | NA       | 35.18    | not significant |
| 4005 | GXYLT2      | -1.01 | 5.68E-01 | 7.82E-01 | 731.08   | not significant |
| 4006 | ZDHHC21     | -1.01 | 6.05E-01 | 8.05E-01 | 396.26   | not significant |
| 4007 | TSTD2       | -1.01 | 6.31E-01 | 8.21E-01 | 961.43   | not significant |
| 4008 | PANK3       | -1.01 | 6.32E-01 | 8.22E-01 | 2441.55  | not significant |
| 4009 | PER2        | -1.01 | 6.32E-01 | 8.22E-01 | 1336.06  | not significant |
| 4010 | THOP1       | -1.01 | 5.99E-01 | 8.02E-01 | 3176.64  | not significant |
| 4011 | GLO1        | -1.01 | 5.79E-01 | 7.88E-01 | 7491.46  | not significant |
| 4012 | NT5C2       | -1.01 | 6.13E-01 | 8.10E-01 | 2902.41  | not significant |
| 4013 | NUCB1-AS1   | -1.01 | 7.04E-02 | NA       | 15.43    | not significant |
| 4014 | ZNF563      | -1.01 | 2.50E-01 | NA       | 39.34    | not significant |
| 4015 | FUT10       | -1.01 | 4.19E-01 | 6.75E-01 | 488.64   | not significant |
| 4016 | SGK494      | -1.01 | 5.36E-01 | 7.61E-01 | 208.21   | not significant |
| 4017 | ECI2        | -1.01 | 6.36E-01 | 8.23E-01 | 1567.55  | not significant |
| 4018 | STX17       | -1.01 | 6.38E-01 | 8.25E-01 | 1464.23  | not significant |
| 4019 | AAAS        | -1.01 | 6.07E-01 | 8.07E-01 | 3049.55  | not significant |
| 4020 | CANX        | -1.01 | 5.91E-01 | 7.97E-01 | 34219.67 | not significant |
| 4021 | MT1E        | -1.01 | 5.82E-01 | 7.90E-01 | 3038.93  | not significant |
| 4022 | TPRN        | -1.01 | 6.19E-01 | 8.14E-01 | 559.68   | not significant |
| 4023 | BRCA2       | -1.01 | 5.98E-01 | 8.02E-01 | 2387.74  | not significant |
| 4024 | KIAA1919    | -1.01 | 5.99E-01 | 8.02E-01 | 427.35   | not significant |
| 4025 | CHIC1       | -1.01 | 6.17E-01 | 8.13E-01 | 451.11   | not significant |
| 4026 | IFRD1       | -1.01 | 6.34E-01 | 8.23E-01 | 1357.32  | not significant |
| 4027 | SP100       | -1.01 | 6.27E-01 | 8.19E-01 | 1859.11  | not significant |
| 4028 | ZNF318      | -1.01 | 6.36E-01 | 8.24E-01 | 1650.38  | not significant |
| 4029 | STRN        | -1.01 | 6.32E-01 | 8.22E-01 | 3272.69  | not significant |
| 4030 | AGL         | -1.01 | 6.34E-01 | 8.23E-01 | 1700.20  | not significant |
| 4031 | HIPK3       | -1.01 | 6.19E-01 | 8.14E-01 | 3073.34  | not significant |
| 4032 | RPL37A      | -1.01 | 8.32E-01 | 9.29E-01 | 20283.87 | not significant |
| 4033 | ZNF283      | -1.01 | 5.02E-01 | 7.38E-01 | 134.72   | not significant |
| 4034 | UBA6-AS1    | -1.01 | 6.14E-01 | 8.10E-01 | 417.59   | not significant |
| 4035 | NDRG3       | -1.01 | 6.26E-01 | 8.18E-01 | 2349.73  | not significant |

|      |           |       |          |          |          |                 |
|------|-----------|-------|----------|----------|----------|-----------------|
| 4036 | MRPL30    | -1.01 | 6.25E-01 | 8.17E-01 | 2219.12  | not significant |
| 4037 | FAM120C   | -1.01 | 3.38E-01 | NA       | 53.64    | not significant |
| 4038 | TIMM8B    | -1.01 | 5.61E-01 | 7.78E-01 | 1260.31  | not significant |
| 4039 | PRR22     | -1.01 | 4.92E-01 | 7.31E-01 | 135.34   | not significant |
| 4040 | PDS2      | -1.01 | 5.82E-01 | 7.90E-01 | 266.24   | not significant |
| 4041 | MRPL14    | -1.01 | 6.39E-01 | 8.27E-01 | 1321.67  | not significant |
| 4042 | KIAA1462  | -1.01 | 6.14E-01 | 8.11E-01 | 390.96   | not significant |
| 4043 | AP1S2     | -1.01 | 6.40E-01 | 8.27E-01 | 983.41   | not significant |
| 4044 | ERCC1     | -1.01 | 6.52E-01 | 8.35E-01 | 1681.84  | not significant |
| 4045 | TIPARP    | -1.01 | 6.19E-01 | 8.14E-01 | 438.75   | not significant |
| 4046 | IWS1      | -1.01 | 6.15E-01 | 8.12E-01 | 3427.88  | not significant |
| 4047 | UFM1      | -1.01 | 6.10E-01 | 8.09E-01 | 3213.87  | not significant |
| 4048 | MECP2     | -1.01 | 4.84E-01 | 7.25E-01 | 116.99   | not significant |
| 4049 | SURF6     | -1.01 | 5.62E-01 | 7.78E-01 | 207.90   | not significant |
| 4050 | ZNF397    | -1.01 | 6.37E-01 | 8.24E-01 | 737.63   | not significant |
| 4051 | GADD45B   | -1.01 | 6.39E-01 | 8.26E-01 | 546.20   | not significant |
| 4052 | SRSF9     | -1.01 | 6.25E-01 | 8.17E-01 | 6918.28  | not significant |
| 4053 | GUCD1     | -1.01 | 6.22E-01 | 8.15E-01 | 3504.44  | not significant |
| 4054 | EIF3H     | -1.01 | 5.77E-01 | 7.87E-01 | 8817.83  | not significant |
| 4055 | HIST1H2BM | -1.01 | 1.22E-01 | NA       | 20.81    | not significant |
| 4056 | HMGN3-AS1 | -1.01 | 2.57E-01 | NA       | 37.76    | not significant |
| 4057 | THSD1     | -1.01 | 2.43E-01 | NA       | 33.86    | not significant |
| 4058 | GTDC1     | -1.01 | 6.62E-01 | 8.41E-01 | 254.38   | not significant |
| 4059 | DCUN1D2   | -1.01 | 6.42E-01 | 8.28E-01 | 652.06   | not significant |
| 4060 | COX10-AS1 | -1.01 | 5.91E-01 | 7.98E-01 | 293.11   | not significant |
| 4061 | VPS45     | -1.01 | 6.42E-01 | 8.28E-01 | 657.31   | not significant |
| 4062 | EPS15L1   | -1.01 | 6.43E-01 | 8.30E-01 | 1448.58  | not significant |
| 4063 | ANGEL1    | -1.01 | 6.22E-01 | 8.15E-01 | 680.98   | not significant |
| 4064 | CAPNS1    | -1.01 | 6.22E-01 | 8.15E-01 | 7086.80  | not significant |
| 4065 | TNFRSF21  | -1.01 | 6.46E-01 | 8.32E-01 | 939.99   | not significant |
| 4066 | CD7       | -1.01 | 6.20E-01 | 8.15E-01 | 6140.00  | not significant |
| 4067 | SAP30L    | -1.01 | 6.43E-01 | 8.29E-01 | 1486.05  | not significant |
| 4068 | ZNF335    | -1.01 | 6.37E-01 | 8.24E-01 | 2702.92  | not significant |
| 4069 | PPP2R5C   | -1.01 | 6.22E-01 | 8.15E-01 | 4157.47  | not significant |
| 4070 | TXNRD1    | -1.01 | 5.53E-01 | 7.71E-01 | 12654.54 | not significant |
| 4071 | HARB1     | -1.01 | 4.74E-01 | 7.17E-01 | 111.48   | not significant |
| 4072 | FAM58A    | -1.01 | 5.85E-01 | 7.93E-01 | 255.58   | not significant |
| 4073 | LSM12     | -1.01 | 5.85E-01 | 7.93E-01 | 241.03   | not significant |
| 4074 | MRPL24    | -1.01 | 6.48E-01 | 8.32E-01 | 1143.94  | not significant |
| 4075 | ZW10      | -1.01 | 6.45E-01 | 8.31E-01 | 1593.28  | not significant |
| 4076 | MAP7D1    | -1.01 | 5.99E-01 | 8.02E-01 | 6031.19  | not significant |
| 4077 | RFC3      | -1.01 | 6.17E-01 | 8.13E-01 | 3514.32  | not significant |
| 4078 | TOP2B     | -1.01 | 6.18E-01 | 8.14E-01 | 11709.26 | not significant |
| 4079 | SEPP1     | -1.01 | 2.48E-02 | NA       | 11.16    | not significant |
| 4080 | LOC440600 | -1.01 | 1.30E-01 | NA       | 21.07    | not significant |
| 4081 | KBTBD3    | -1.01 | 3.45E-01 | NA       | 53.83    | not significant |
| 4082 | PEPD      | -1.01 | 6.50E-01 | 8.33E-01 | 1372.27  | not significant |
| 4083 | ALG2      | -1.01 | 6.48E-01 | 8.32E-01 | 741.25   | not significant |
| 4084 | NGRN      | -1.01 | 6.37E-01 | 8.24E-01 | 2424.93  | not significant |
| 4085 | ATF7IP    | -1.01 | 6.48E-01 | 8.32E-01 | 2580.05  | not significant |
| 4086 | RALA      | -1.01 | 6.23E-01 | 8.15E-01 | 3369.88  | not significant |
| 4087 | SCAP      | -1.01 | 6.46E-01 | 8.31E-01 | 4596.31  | not significant |
| 4088 | ZFP36L2   | -1.01 | 6.15E-01 | 8.12E-01 | 3736.08  | not significant |
| 4089 | CCR5      | -1.01 | 1.18E-01 | NA       | 18.87    | not significant |
| 4090 | MIF-AS1   | -1.01 | 9.27E-01 | 9.73E-01 | 1053.24  | not significant |
| 4091 | SOWAHA    | -1.01 | 3.68E-01 | NA       | 64.96    | not significant |
| 4092 | LOC407835 | -1.01 | 1.73E-01 | NA       | 28.51    | not significant |
| 4093 | SH3BP5    | -1.01 | 4.15E-01 | NA       | 91.69    | not significant |
| 4094 | ONECUT2   | -1.01 | 5.16E-01 | 7.47E-01 | 132.62   | not significant |
| 4095 | NQO1      | -1.01 | 5.53E-01 | 7.72E-01 | 259.36   | not significant |
| 4096 | FAM200B   | -1.01 | 6.03E-01 | 8.03E-01 | 295.79   | not significant |
| 4097 | UHRF1BP1  | -1.01 | 6.53E-01 | 8.36E-01 | 2362.50  | not significant |
| 4098 | MB21D2    | -1.01 | 3.91E-01 | NA       | 62.72    | not significant |
| 4099 | KIAA1614  | -1.01 | 1.74E-01 | NA       | 23.74    | not significant |
| 4100 | IQCG      | -1.01 | 4.38E-01 | NA       | 80.95    | not significant |
| 4101 | SEMA4F    | -1.01 | 5.63E-01 | 7.79E-01 | 177.74   | not significant |
| 4102 | FYCO1     | -1.01 | 6.01E-01 | 8.02E-01 | 1638.86  | not significant |
| 4103 | MLYCD     | -1.01 | 6.14E-01 | 8.11E-01 | 325.25   | not significant |
| 4104 | MAST4     | -1.01 | 6.53E-01 | 8.36E-01 | 1259.62  | not significant |
| 4105 | GBE1      | -1.01 | 6.65E-01 | 8.42E-01 | 1620.51  | not significant |
| 4106 | ZKSCAN8   | -1.01 | 6.59E-01 | 8.39E-01 | 2136.71  | not significant |
| 4107 | KIF13B    | -1.01 | 6.50E-01 | 8.33E-01 | 1761.13  | not significant |
| 4108 | CLSPN     | -1.01 | 6.44E-01 | 8.30E-01 | 5106.09  | not significant |
| 4109 | SRPRB     | -1.01 | 6.32E-01 | 8.22E-01 | 3129.01  | not significant |
| 4110 | COL15A1   | -1.01 | 1.32E-01 | NA       | 19.09    | not significant |
| 4111 | ARL4D     | -1.01 | 4.44E-01 | NA       | 84.16    | not significant |
| 4112 | RAPGEFL1  | -1.01 | 4.42E-01 | 6.93E-01 | 141.84   | not significant |
| 4113 | COL5A2    | -1.01 | 4.96E-01 | 7.33E-01 | 113.89   | not significant |
| 4114 | UBE2E3    | -1.01 | 6.26E-01 | 8.18E-01 | 363.17   | not significant |
| 4115 | BRE       | -1.01 | 6.54E-01 | 8.36E-01 | 794.24   | not significant |
| 4116 | TADA2B    | -1.01 | 6.58E-01 | 8.39E-01 | 912.64   | not significant |
| 4117 | SNRPF     | -1.01 | 6.48E-01 | 8.32E-01 | 4941.39  | not significant |
| 4118 | APBB1IP   | -1.01 | 6.59E-01 | 8.39E-01 | 1609.83  | not significant |
| 4119 | USP31     | -1.01 | 6.74E-01 | 8.47E-01 | 688.75   | not significant |
| 4120 | LYSMD3    | -1.01 | 6.59E-01 | 8.39E-01 | 1214.02  | not significant |
| 4121 | GTF2H3    | -1.01 | 6.35E-01 | 8.23E-01 | 2532.33  | not significant |
| 4122 | LGALS     | -1.01 | 1.39E-01 | NA       | 19.64    | not significant |
| 4123 | MAFB      | -1.01 | 1.78E-01 | NA       | 23.09    | not significant |

|      |              |       |          |          |          |                 |
|------|--------------|-------|----------|----------|----------|-----------------|
| 4124 | 43711_25571  | -1.01 | 1.97E-01 | NA       | 25.70    | not significant |
| 4125 | SNX33        | -1.01 | 4.00E-01 | NA       | 62.99    | not significant |
| 4126 | KCNJ14       | -1.01 | 4.82E-01 | NA       | 96.22    | not significant |
| 4127 | ZNF391       | -1.01 | 5.41E-01 | 7.63E-01 | 147.48   | not significant |
| 4128 | MSL3P1       | -1.01 | 6.44E-01 | 8.30E-01 | 502.87   | not significant |
| 4129 | HMGB3        | -1.01 | 6.58E-01 | 8.39E-01 | 713.46   | not significant |
| 4130 | SNX1         | -1.01 | 6.21E-01 | 8.15E-01 | 3456.99  | not significant |
| 4131 | SRSF7        | -1.01 | 6.12E-01 | 8.10E-01 | 9606.18  | not significant |
| 4132 | KIF5A        | -1.01 | 1.45E-01 | NA       | 19.35    | not significant |
| 4133 | SMARCA5-AS1  | -1.01 | 1.36E-01 | NA       | 26.43    | not significant |
| 4134 | LOXL2        | -1.01 | 4.58E-01 | NA       | 85.97    | not significant |
| 4135 | PHACTR2      | -1.01 | 4.64E-01 | NA       | 90.71    | not significant |
| 4136 | TPT1-AS1     | -1.01 | 5.51E-01 | 7.71E-01 | 159.96   | not significant |
| 4137 | ZNF558       | -1.01 | 5.34E-01 | 7.59E-01 | 161.22   | not significant |
| 4138 | METTL10      | -1.01 | 6.63E-01 | 8.41E-01 | 808.95   | not significant |
| 4139 | FEM1C        | -1.01 | 6.32E-01 | 8.22E-01 | 984.08   | not significant |
| 4140 | ZNF708       | -1.01 | 6.63E-01 | 8.41E-01 | 802.00   | not significant |
| 4141 | ACBD5        | -1.01 | 6.63E-01 | 8.41E-01 | 1106.77  | not significant |
| 4142 | RAD54B       | -1.01 | 6.60E-01 | 8.39E-01 | 1434.51  | not significant |
| 4143 | SCRIB        | -1.01 | 6.46E-01 | 8.31E-01 | 2578.05  | not significant |
| 4144 | NOTCH1       | -1.01 | 6.47E-01 | 8.32E-01 | 11277.72 | not significant |
| 4145 | FGD5-AS1     | -1.01 | 6.20E-01 | 8.15E-01 | 5916.61  | not significant |
| 4146 | MTHFD1       | -1.01 | 5.70E-01 | 7.83E-01 | 11341.17 | not significant |
| 4147 | FGD2         | -1.01 | 4.94E-01 | 7.33E-01 | 102.40   | not significant |
| 4148 | C16orf91     | -1.01 | 6.49E-01 | 8.33E-01 | 547.30   | not significant |
| 4149 | AH11         | -1.01 | 6.24E-01 | 8.16E-01 | 305.47   | not significant |
| 4150 | PALD1        | -1.01 | 6.55E-01 | 8.37E-01 | 461.02   | not significant |
| 4151 | MED17        | -1.01 | 6.64E-01 | 8.42E-01 | 1361.52  | not significant |
| 4152 | GPR180       | -1.01 | 6.59E-01 | 8.39E-01 | 1699.09  | not significant |
| 4153 | ANKAR        | -1.01 | 3.49E-01 | NA       | 47.37    | not significant |
| 4154 | SUSD2        | -1.01 | 1.80E-01 | NA       | 23.15    | not significant |
| 4155 | PTGDR2       | -1.01 | 3.79E-01 | NA       | 54.83    | not significant |
| 4156 | RCE1         | -1.01 | 6.63E-01 | 8.41E-01 | 895.20   | not significant |
| 4157 | NDUFAF5      | -1.01 | 6.51E-01 | 8.34E-01 | 689.11   | not significant |
| 4158 | TEX261       | -1.01 | 6.34E-01 | 8.23E-01 | 422.66   | not significant |
| 4159 | DNAAF2       | -1.01 | 6.58E-01 | 8.39E-01 | 513.91   | not significant |
| 4160 | PXN          | -1.01 | 6.43E-01 | 8.30E-01 | 458.93   | not significant |
| 4161 | PPP4C        | -1.01 | 6.53E-01 | 8.36E-01 | 4843.34  | not significant |
| 4162 | RAP2C        | -1.01 | 6.75E-01 | 8.47E-01 | 1681.71  | not significant |
| 4163 | TANGO6       | -1.01 | 6.66E-01 | 8.43E-01 | 953.72   | not significant |
| 4164 | USP19        | -1.01 | 6.52E-01 | 8.35E-01 | 3026.06  | not significant |
| 4165 | CREB3L2      | -1.01 | 6.64E-01 | 8.42E-01 | 2845.29  | not significant |
| 4166 | SATB1        | -1.01 | 6.62E-01 | 8.41E-01 | 1898.26  | not significant |
| 4167 | CTBP1-AS     | -1.01 | 2.57E-01 | NA       | 36.21    | not significant |
| 4168 | ASPRV1       | -1.01 | 4.37E-01 | NA       | 75.61    | not significant |
| 4169 | VCAN         | -1.01 | 4.90E-01 | 7.29E-01 | 103.40   | not significant |
| 4170 | CHEK2        | -1.01 | 6.71E-01 | 8.46E-01 | 786.00   | not significant |
| 4171 | PARP16       | -1.01 | 6.71E-01 | 8.46E-01 | 849.42   | not significant |
| 4172 | ARPC1A       | -1.01 | 6.67E-01 | 8.43E-01 | 2494.02  | not significant |
| 4173 | RBM34        | -1.01 | 6.70E-01 | 8.45E-01 | 1308.42  | not significant |
| 4174 | RIOK3        | -1.01 | 6.60E-01 | 8.39E-01 | 1931.81  | not significant |
| 4175 | PHF10        | -1.01 | 6.57E-01 | 8.38E-01 | 2180.60  | not significant |
| 4176 | ERCC6L       | -1.01 | 6.69E-01 | 8.44E-01 | 1832.78  | not significant |
| 4177 | ZBED4        | -1.01 | 6.49E-01 | 8.33E-01 | 5315.72  | not significant |
| 4178 | TTC3         | -1.01 | 6.22E-01 | 8.15E-01 | 6295.88  | not significant |
| 4179 | LINC00852    | -1.01 | 3.32E-01 | NA       | 43.39    | not significant |
| 4180 | CYTIP        | -1.01 | 1.47E-01 | NA       | 19.16    | not significant |
| 4181 | SDK2         | -1.01 | 3.08E-01 | NA       | 38.11    | not significant |
| 4182 | LOC100506100 | -1.01 | 4.98E-01 | 7.35E-01 | 100.91   | not significant |
| 4183 | COQ2         | -1.01 | 5.82E-01 | 7.90E-01 | 194.66   | not significant |
| 4184 | NR1H3        | -1.01 | 5.67E-01 | 7.81E-01 | 160.68   | not significant |
| 4185 | PLEKHA8P1    | -1.01 | 5.94E-01 | 7.99E-01 | 224.26   | not significant |
| 4186 | MNAT1        | -1.01 | 6.70E-01 | 8.45E-01 | 971.20   | not significant |
| 4187 | MAPKAPK2     | -1.01 | 6.47E-01 | 8.32E-01 | 659.38   | not significant |
| 4188 | UAP1         | -1.01 | 6.73E-01 | 8.47E-01 | 1354.66  | not significant |
| 4189 | NECAP2       | -1.01 | 6.72E-01 | 8.46E-01 | 2369.53  | not significant |
| 4190 | WDR45B       | -1.01 | 6.63E-01 | 8.41E-01 | 2362.03  | not significant |
| 4191 | PRKY         | -1.01 | 6.72E-01 | 8.47E-01 | 803.95   | not significant |
| 4192 | SLC38A1      | -1.01 | 6.47E-01 | 8.32E-01 | 21081.91 | not significant |
| 4193 | TBK1         | -1.01 | 7.65E-01 | 8.95E-01 | 1569.59  | not significant |
| 4194 | MBNL1-AS1    | -1.01 | 1.85E-01 | NA       | 21.79    | not significant |
| 4195 | LIMD1-AS1    | -1.01 | 3.28E-01 | NA       | 47.18    | not significant |
| 4196 | IL11RA       | -1.01 | 5.06E-01 | 7.40E-01 | 110.99   | not significant |
| 4197 | C16orf46     | -1.01 | 4.38E-01 | NA       | 71.92    | not significant |
| 4198 | FTX          | -1.01 | 2.87E-01 | NA       | 33.49    | not significant |
| 4199 | TSEN34       | -1.01 | 5.65E-01 | 7.80E-01 | 149.74   | not significant |
| 4200 | WDR35        | -1.01 | 5.75E-01 | 7.86E-01 | 162.11   | not significant |
| 4201 | OCRL         | -1.01 | 5.79E-01 | 7.88E-01 | 181.21   | not significant |
| 4202 | MIR4697HG    | -1.01 | 5.98E-01 | 8.02E-01 | 221.87   | not significant |
| 4203 | MICALL1      | -1.01 | 6.49E-01 | 8.32E-01 | 384.11   | not significant |
| 4204 | SLBP         | -1.01 | 6.16E-01 | 8.13E-01 | 7859.74  | not significant |
| 4205 | SMARCD1      | -1.01 | 5.88E-01 | 7.95E-01 | 9483.14  | not significant |
| 4206 | NCAPG2       | -1.01 | 6.21E-01 | 8.15E-01 | 6025.79  | not significant |
| 4207 | WDHD1        | -1.01 | 6.60E-01 | 8.40E-01 | 3875.30  | not significant |
| 4208 | OSBP2        | -1.01 | 3.66E-01 | NA       | 47.93    | not significant |
| 4209 | POU6F1       | -1.01 | 3.53E-01 | NA       | 45.91    | not significant |
| 4210 | IFI44L       | -1.01 | 2.00E-01 | NA       | 22.58    | not significant |
| 4211 | UBA52        | -1.01 | 6.75E-01 | 8.47E-01 | 15916.74 | not significant |

|      |              |       |          |          |          |                 |
|------|--------------|-------|----------|----------|----------|-----------------|
| 4212 | IFI6         | -1.01 | 6.81E-01 | 8.50E-01 | 1332.81  | not significant |
| 4213 | TOP1MT       | -1.01 | 6.77E-01 | 8.49E-01 | 1759.41  | not significant |
| 4214 | THNSL1       | -1.01 | 6.67E-01 | 8.43E-01 | 714.11   | not significant |
| 4215 | ICE2         | -1.01 | 6.61E-01 | 8.40E-01 | 3033.32  | not significant |
| 4216 | LRRC39       | -1.01 | 1.66E-01 | NA       | 21.41    | not significant |
| 4217 | ITGA10       | -1.01 | 1.15E-01 | NA       | 16.42    | not significant |
| 4218 | PFN2         | -1.01 | 5.46E-01 | 7.66E-01 | 125.66   | not significant |
| 4219 | MDK          | -1.01 | 5.22E-01 | 7.51E-01 | 114.15   | not significant |
| 4220 | MTFMT        | -1.01 | 6.63E-01 | 8.41E-01 | 458.77   | not significant |
| 4221 | AMZ2         | -1.01 | 6.79E-01 | 8.50E-01 | 760.55   | not significant |
| 4222 | SFXN5        | -1.01 | 6.55E-01 | 8.37E-01 | 377.71   | not significant |
| 4223 | BNIP3        | -1.01 | 7.02E-01 | 8.59E-01 | 739.34   | not significant |
| 4224 | PPP2R3C      | -1.01 | 6.69E-01 | 8.44E-01 | 1222.34  | not significant |
| 4225 | PPP1R14B     | -1.01 | 6.82E-01 | 8.50E-01 | 2838.78  | not significant |
| 4226 | SLC39A7      | -1.01 | 6.79E-01 | 8.50E-01 | 777.54   | not significant |
| 4227 | MKS1         | -1.01 | 6.79E-01 | 8.50E-01 | 851.39   | not significant |
| 4228 | AXIN1        | -1.01 | 6.79E-01 | 8.50E-01 | 1297.77  | not significant |
| 4229 | ORMDL3       | -1.01 | 6.14E-01 | 8.10E-01 | 5928.23  | not significant |
| 4230 | SHC4         | -1.01 | 1.97E-01 | NA       | 21.44    | not significant |
| 4231 | UBE2V1       | -1.01 | 3.75E-01 | NA       | 50.40    | not significant |
| 4232 | RNPEP        | -1.01 | 6.62E-01 | 8.41E-01 | 443.38   | not significant |
| 4233 | GALE         | -1.01 | 6.65E-01 | 8.42E-01 | 678.06   | not significant |
| 4234 | IPCEF1       | -1.01 | 6.76E-01 | 8.48E-01 | 589.11   | not significant |
| 4235 | GPALPP1      | -1.01 | 6.83E-01 | 8.51E-01 | 942.08   | not significant |
| 4236 | HERC4        | -1.01 | 6.80E-01 | 8.50E-01 | 1491.77  | not significant |
| 4237 | ZNF430       | -1.01 | 6.81E-01 | 8.50E-01 | 1307.00  | not significant |
| 4238 | SNX6         | -1.01 | 6.77E-01 | 8.48E-01 | 2033.79  | not significant |
| 4239 | WDR36        | -1.01 | 6.73E-01 | 8.47E-01 | 4074.65  | not significant |
| 4240 | ZMYND11      | -1.01 | 6.73E-01 | 8.47E-01 | 2540.55  | not significant |
| 4241 | RMND5A       | -1.01 | 6.47E-01 | 8.32E-01 | 4951.80  | not significant |
| 4242 | MMS22L       | -1.01 | 6.85E-01 | 8.52E-01 | 3420.28  | not significant |
| 4243 | ACTA2-AS1    | -1.01 | 2.06E-01 | NA       | 23.01    | not significant |
| 4244 | AMOTL2       | -1.01 | 3.52E-01 | NA       | 43.75    | not significant |
| 4245 | ZNF565       | -1.01 | 3.66E-01 | NA       | 48.76    | not significant |
| 4246 | ZDHC11       | -1.01 | 3.49E-01 | NA       | 41.61    | not significant |
| 4247 | RCOR2        | -1.01 | 4.71E-01 | NA       | 78.07    | not significant |
| 4248 | CFAP44       | -1.01 | 6.04E-01 | 8.04E-01 | 246.58   | not significant |
| 4249 | BOD1L1       | -1.01 | 6.62E-01 | 8.41E-01 | 2955.73  | not significant |
| 4250 | ZNF180       | -1.01 | 6.65E-01 | 8.42E-01 | 527.43   | not significant |
| 4251 | PHF8         | -1.01 | 6.78E-01 | 8.49E-01 | 582.78   | not significant |
| 4252 | KIAA2013     | -1.01 | 6.81E-01 | 8.50E-01 | 1799.35  | not significant |
| 4253 | AHCYL2       | -1.01 | 6.84E-01 | 8.52E-01 | 1275.77  | not significant |
| 4254 | ABHD2        | -1.01 | 6.78E-01 | 8.49E-01 | 2951.98  | not significant |
| 4255 | SORT1        | -1.01 | 6.76E-01 | 8.48E-01 | 3277.42  | not significant |
| 4256 | GUF1         | -1.01 | 6.81E-01 | 8.50E-01 | 2348.72  | not significant |
| 4257 | SPG20        | -1.01 | 1.71E-01 | NA       | 19.21    | not significant |
| 4258 | PLD6         | -1.01 | 3.34E-01 | NA       | 42.17    | not significant |
| 4259 | FAM227B      | -1.01 | 3.14E-01 | NA       | 35.15    | not significant |
| 4260 | ROPN1L       | -1.01 | 2.93E-01 | NA       | 31.16    | not significant |
| 4261 | SDHAP1       | -1.01 | 5.92E-01 | 7.98E-01 | 183.78   | not significant |
| 4262 | ZNF492       | -1.01 | 5.85E-01 | 7.93E-01 | 176.39   | not significant |
| 4263 | MYL6B        | -1.01 | 6.77E-01 | 8.49E-01 | 3068.59  | not significant |
| 4264 | MON1B        | -1.01 | 6.83E-01 | 8.51E-01 | 1740.79  | not significant |
| 4265 | DTD1         | -1.01 | 7.93E-02 | NA       | 12.18    | not significant |
| 4266 | LOC100507557 | -1.01 | 1.72E-01 | NA       | 19.63    | not significant |
| 4267 | PSMD6-AS2    | -1.01 | 2.58E-01 | NA       | 26.34    | not significant |
| 4268 | RFX2         | -1.01 | 4.52E-01 | NA       | 71.57    | not significant |
| 4269 | NFAT5        | -1.01 | 6.43E-01 | 8.30E-01 | 1503.08  | not significant |
| 4270 | SDCCAG8      | -1.01 | 6.50E-01 | 8.33E-01 | 399.91   | not significant |
| 4271 | MRPL40       | -1.01 | 6.81E-01 | 8.50E-01 | 578.40   | not significant |
| 4272 | C9orf40      | -1.01 | 6.89E-01 | 8.54E-01 | 909.65   | not significant |
| 4273 | NPM3         | -1.01 | 6.68E-01 | 8.44E-01 | 2182.37  | not significant |
| 4274 | ATE1         | -1.01 | 6.89E-01 | 8.54E-01 | 1503.49  | not significant |
| 4275 | SECISBP2L    | -1.01 | 6.87E-01 | 8.53E-01 | 1950.46  | not significant |
| 4276 | PAX8-AS1     | -1.01 | 6.89E-01 | 8.54E-01 | 1082.80  | not significant |
| 4277 | MAP9         | -1.01 | 6.80E-01 | 8.50E-01 | 569.83   | not significant |
| 4278 | NEIL3        | -1.01 | 6.83E-01 | 8.51E-01 | 1856.73  | not significant |
| 4279 | SELT         | -1.01 | 6.81E-01 | 8.50E-01 | 3325.70  | not significant |
| 4280 | TCF25        | -1.01 | 6.73E-01 | 8.47E-01 | 2567.47  | not significant |
| 4281 | CEP120       | -1.01 | 6.91E-01 | 8.54E-01 | 1229.41  | not significant |
| 4282 | CASP2        | -1.01 | 6.59E-01 | 8.39E-01 | 6963.73  | not significant |
| 4283 | AGGF1        | -1.01 | 6.66E-01 | 8.42E-01 | 3171.95  | not significant |
| 4284 | NRIP3        | -1.01 | 1.52E-01 | NA       | 17.52    | not significant |
| 4285 | KCNA6        | -1.01 | 1.64E-01 | NA       | 18.71    | not significant |
| 4286 | SLC38A6      | -1.01 | 6.07E-01 | 8.06E-01 | 186.78   | not significant |
| 4287 | CD109        | -1.01 | 5.98E-01 | 8.02E-01 | 172.11   | not significant |
| 4288 | PRR3         | -1.01 | 6.50E-01 | 8.33E-01 | 309.79   | not significant |
| 4289 | IDS          | -1.01 | 6.79E-01 | 8.49E-01 | 507.29   | not significant |
| 4290 | ARHGAP18     | -1.01 | 6.89E-01 | 8.54E-01 | 569.11   | not significant |
| 4291 | GLDC         | -1.01 | 6.92E-01 | 8.55E-01 | 828.01   | not significant |
| 4292 | PDE10A       | -1.01 | 4.04E-01 | NA       | 63.38    | not significant |
| 4293 | ATP1A3       | -1.01 | 6.68E-01 | 8.44E-01 | 354.00   | not significant |
| 4294 | SNRPG        | -1.01 | 6.95E-01 | 8.57E-01 | 2345.62  | not significant |
| 4295 | INVS         | -1.01 | 6.68E-01 | 8.44E-01 | 569.71   | not significant |
| 4296 | ATG16L1      | -1.01 | 6.96E-01 | 8.58E-01 | 981.73   | not significant |
| 4297 | CAPZB        | -1.01 | 6.35E-01 | 8.23E-01 | 7053.21  | not significant |
| 4298 | CHD1         | -1.01 | 6.91E-01 | 8.54E-01 | 1886.07  | not significant |
| 4299 | RPL4         | -1.01 | 6.60E-01 | 8.39E-01 | 29158.47 | not significant |

|      |              |       |          |          |          |                 |
|------|--------------|-------|----------|----------|----------|-----------------|
| 4300 | SMC6         | -1.01 | 6.85E-01 | 8.52E-01 | 2572.69  | not significant |
| 4301 | MAP4K5       | -1.01 | 6.94E-01 | 8.57E-01 | 1692.79  | not significant |
| 4302 | LHFPL2       | -1.01 | 1.56E-01 | NA       | 16.60    | not significant |
| 4303 | TOR4A        | -1.01 | 2.31E-01 | NA       | 24.04    | not significant |
| 4304 | REEP6        | -1.01 | 2.75E-01 | NA       | 28.79    | not significant |
| 4305 | FLJ44635     | -1.01 | 4.19E-01 | NA       | 56.81    | not significant |
| 4306 | ERP27        | -1.01 | 4.90E-01 | NA       | 78.04    | not significant |
| 4307 | NUGGC        | -1.01 | 6.28E-01 | 8.19E-01 | 202.27   | not significant |
| 4308 | UQCC3        | -1.01 | 6.73E-01 | 8.47E-01 | 452.91   | not significant |
| 4309 | HEMK1        | -1.01 | 6.95E-01 | 8.57E-01 | 2413.75  | not significant |
| 4310 | NUDT19       | -1.01 | 6.89E-01 | 8.54E-01 | 602.37   | not significant |
| 4311 | MAP2K1       | -1.01 | 6.81E-01 | 8.50E-01 | 2742.95  | not significant |
| 4312 | DDX39A       | -1.01 | 6.64E-01 | 8.42E-01 | 9479.66  | not significant |
| 4313 | TRAPPC9      | -1.01 | 6.89E-01 | 8.54E-01 | 2252.01  | not significant |
| 4314 | MLLT6        | -1.01 | 6.67E-01 | 8.43E-01 | 7567.47  | not significant |
| 4315 | LASP1        | -1.01 | 6.20E-01 | 8.14E-01 | 8781.86  | not significant |
| 4316 | MFHAS1       | -1.01 | 6.61E-01 | 8.40E-01 | 5232.88  | not significant |
| 4317 | LOC100288842 | -1.01 | 1.78E-01 | NA       | 19.41    | not significant |
| 4318 | ZNF432       | -1.01 | 6.36E-01 | 8.24E-01 | 272.48   | not significant |
| 4319 | EFNB1        | -1.01 | 6.61E-01 | 8.41E-01 | 307.91   | not significant |
| 4320 | ZCCHC10      | -1.01 | 7.01E-01 | 8.59E-01 | 1117.88  | not significant |
| 4321 | SALL2        | -1.01 | 6.83E-01 | 8.51E-01 | 471.86   | not significant |
| 4322 | PIGX         | -1.01 | 6.90E-01 | 8.54E-01 | 2526.39  | not significant |
| 4323 | MBD3         | -1.01 | 6.83E-01 | 8.51E-01 | 6180.50  | not significant |
| 4324 | SNRK         | -1.01 | 6.99E-01 | 8.59E-01 | 1442.11  | not significant |
| 4325 | MAP3K5       | -1.01 | 3.32E-01 | NA       | 38.22    | not significant |
| 4326 | LINC00176    | -1.01 | 4.12E-01 | NA       | 50.60    | not significant |
| 4327 | AK1          | -1.01 | 4.51E-01 | NA       | 63.73    | not significant |
| 4328 | SLC25A5-AS1  | -1.01 | 2.10E-01 | 4.74E-01 | 565.94   | not significant |
| 4329 | SOCS2-AS1    | -1.01 | 4.39E-01 | NA       | 55.80    | not significant |
| 4330 | ANKRD22      | -1.01 | 4.40E-01 | NA       | 55.63    | not significant |
| 4331 | LINC00630    | -1.01 | 5.58E-01 | 7.76E-01 | 113.70   | not significant |
| 4332 | CBX8         | -1.01 | 6.91E-01 | 8.54E-01 | 545.51   | not significant |
| 4333 | ACTR5        | -1.01 | 7.02E-01 | 8.59E-01 | 774.16   | not significant |
| 4334 | GTF2E1       | -1.01 | 7.01E-01 | 8.59E-01 | 913.34   | not significant |
| 4335 | ARMC10       | -1.01 | 7.01E-01 | 8.59E-01 | 1456.73  | not significant |
| 4336 | DCTN2        | -1.01 | 6.89E-01 | 8.54E-01 | 4336.51  | not significant |
| 4337 | NR2C2        | -1.01 | 6.97E-01 | 8.59E-01 | 3142.41  | not significant |
| 4338 | USP32        | -1.01 | 6.84E-01 | 8.52E-01 | 3511.62  | not significant |
| 4339 | PHACTR4      | -1.01 | 7.00E-01 | 8.59E-01 | 2126.73  | not significant |
| 4340 | ATP8B2       | -1.01 | 6.89E-01 | 8.54E-01 | 3305.40  | not significant |
| 4341 | GSTM2        | -1.01 | 4.84E-01 | NA       | 67.81    | not significant |
| 4342 | ZNF684       | -1.01 | 6.43E-01 | 8.29E-01 | 220.63   | not significant |
| 4343 | COMMD5       | -1.01 | 6.67E-01 | 8.43E-01 | 434.10   | not significant |
| 4344 | CRAT         | -1.01 | 6.23E-01 | 8.16E-01 | 178.76   | not significant |
| 4345 | ATP11A       | -1.01 | 6.67E-01 | 8.43E-01 | 2438.68  | not significant |
| 4346 | KRT10        | -1.01 | 7.01E-01 | 8.59E-01 | 1040.95  | not significant |
| 4347 | KMT2E        | -1.01 | 6.75E-01 | 8.47E-01 | 4862.58  | not significant |
| 4348 | HUS1         | -1.01 | 7.07E-01 | 8.62E-01 | 985.27   | not significant |
| 4349 | PUF60        | -1.01 | 6.98E-01 | 8.59E-01 | 2494.74  | not significant |
| 4350 | MORF4L1      | -1.01 | 6.74E-01 | 8.47E-01 | 4858.72  | not significant |
| 4351 | PWP1         | -1.01 | 6.84E-01 | 8.52E-01 | 2819.14  | not significant |
| 4352 | NFRKB        | -1.01 | 7.02E-01 | 8.59E-01 | 1991.52  | not significant |
| 4353 | ARFGAP2      | -1.01 | 6.86E-01 | 8.53E-01 | 3023.35  | not significant |
| 4354 | SMARCC1      | -1.01 | 6.47E-01 | 8.32E-01 | 13101.73 | not significant |
| 4355 | ZNF233       | -1.01 | 3.14E-01 | NA       | 34.94    | not significant |
| 4356 | LOC101927795 | -1.01 | 1.69E-01 | NA       | 18.87    | not significant |
| 4357 | NBPF8        | -1.01 | 1.25E-01 | NA       | 15.02    | not significant |
| 4358 | DOK2         | -1.01 | 4.97E-01 | NA       | 75.89    | not significant |
| 4359 | DBIL5P       | -1.01 | 3.57E-01 | NA       | 36.67    | not significant |
| 4360 | PRX          | -1.01 | 5.04E-01 | NA       | 78.58    | not significant |
| 4361 | IFIT1        | -1.01 | 3.41E-01 | NA       | 35.31    | not significant |
| 4362 | SURF2        | -1.01 | 6.27E-01 | 8.18E-01 | 200.39   | not significant |
| 4363 | QRICH2       | -1.01 | 6.39E-01 | 8.26E-01 | 265.14   | not significant |
| 4364 | NUBP1        | -1.01 | 6.98E-01 | 8.59E-01 | 571.16   | not significant |
| 4365 | ENY2         | -1.01 | 7.01E-01 | 8.59E-01 | 3362.13  | not significant |
| 4366 | SMS          | -1.01 | 7.03E-01 | 8.60E-01 | 3469.71  | not significant |
| 4367 | STAU2        | -1.01 | 6.74E-01 | 8.47E-01 | 4014.88  | not significant |
| 4368 | DIXDC1       | -1.01 | 2.07E-01 | NA       | 21.76    | not significant |
| 4369 | SNX22        | -1.01 | 2.84E-01 | 5.54E-01 | 177.58   | not significant |
| 4370 | C11orf94     | -1.01 | 8.37E-02 | NA       | 10.06    | not significant |
| 4371 | LOC439994    | -1.01 | 4.35E-01 | NA       | 57.99    | not significant |
| 4372 | TMEM182      | -1.01 | 6.23E-01 | 8.16E-01 | 178.87   | not significant |
| 4373 | ELAC1        | -1.01 | 6.26E-01 | 8.18E-01 | 188.55   | not significant |
| 4374 | ZCWPW1       | -1.01 | 4.57E-01 | NA       | 60.31    | not significant |
| 4375 | SRGAP2       | -1.01 | 6.41E-01 | 8.28E-01 | 244.54   | not significant |
| 4376 | DHODH        | -1.01 | 7.08E-01 | 8.63E-01 | 603.93   | not significant |
| 4377 | TRMU         | -1.01 | 7.09E-01 | 8.64E-01 | 1072.16  | not significant |
| 4378 | APOBEC3F     | -1.01 | 6.98E-01 | 8.59E-01 | 563.95   | not significant |
| 4379 | LOC100130899 | -1.01 | 2.35E-01 | NA       | 22.81    | not significant |
| 4380 | ARMC12       | -1.01 | 2.03E-01 | NA       | 18.21    | not significant |
| 4381 | THRIL        | -1.01 | 1.16E-01 | NA       | 52.16    | not significant |
| 4382 | SLC23A1      | -1.01 | 4.76E-01 | NA       | 64.58    | not significant |
| 4383 | TMEM62       | -1.01 | 5.42E-01 | NA       | 93.36    | not significant |
| 4384 | UIMC1        | -1.01 | 7.13E-01 | 8.67E-01 | 1147.23  | not significant |
| 4385 | TAF5         | -1.01 | 7.13E-01 | 8.66E-01 | 967.31   | not significant |
| 4386 | PSMB8        | -1.01 | 7.11E-01 | 8.65E-01 | 1726.99  | not significant |
| 4387 | GABPA        | -1.01 | 7.12E-01 | 8.65E-01 | 1921.47  | not significant |

|      |                  |       |          |          |          |                 |
|------|------------------|-------|----------|----------|----------|-----------------|
| 4388 | KIAA0232         | -1.01 | 7.10E-01 | 8.65E-01 | 2520.72  | not significant |
| 4389 | ADAMTSL1         | -1.01 | 9.46E-02 | NA       | 10.88    | not significant |
| 4390 | HP09053          | -1.01 | 1.23E-01 | NA       | 13.49    | not significant |
| 4391 | ID12-AS1         | -1.01 | 1.17E-01 | NA       | 12.75    | not significant |
| 4392 | APBB1            | -1.01 | 4.96E-01 | NA       | 65.42    | not significant |
| 4393 | IGF2BP3          | -1.01 | 2.40E-01 | NA       | 20.68    | not significant |
| 4394 | POLR3GL          | -1.01 | 6.61E-01 | 8.40E-01 | 270.51   | not significant |
| 4395 | MRPS18B          | -1.01 | 7.09E-01 | 8.64E-01 | 652.15   | not significant |
| 4396 | ADCK1            | -1.01 | 6.80E-01 | 8.50E-01 | 325.55   | not significant |
| 4397 | KIZ              | -1.01 | 6.98E-01 | 8.59E-01 | 445.31   | not significant |
| 4398 | TRAF3IP3         | -1.01 | 6.92E-01 | 8.55E-01 | 3173.96  | not significant |
| 4399 | FAM133B          | -1.01 | 4.00E-01 | NA       | 41.35    | not significant |
| 4400 | ZNF16            | -1.01 | 6.75E-01 | 8.47E-01 | 303.26   | not significant |
| 4401 | CENPW            | -1.01 | 6.48E-01 | 8.32E-01 | 937.03   | not significant |
| 4402 | DNAJC19          | -1.01 | 7.19E-01 | 8.71E-01 | 886.42   | not significant |
| 4403 | MIS18A           | -1.01 | 7.19E-01 | 8.70E-01 | 1625.03  | not significant |
| 4404 | LYRM2            | -1.01 | 7.13E-01 | 8.66E-01 | 1690.40  | not significant |
| 4405 | RNF114           | -1.01 | 6.88E-01 | 8.54E-01 | 4008.20  | not significant |
| 4406 | SH3GLB1          | -1.01 | 6.91E-01 | 8.54E-01 | 3179.85  | not significant |
| 4407 | PPP3R1           | -1.01 | 6.75E-01 | 8.47E-01 | 6039.57  | not significant |
| 4408 | HIPK1            | -1.01 | 7.10E-01 | 8.64E-01 | 4682.27  | not significant |
| 4409 | DEK              | -1.01 | 6.48E-01 | 8.32E-01 | 14636.38 | not significant |
| 4410 | LOC101928020     | -1.01 | 1.49E-01 | NA       | 13.91    | not significant |
| 4411 | FAM149A          | -1.01 | 5.30E-01 | NA       | 78.75    | not significant |
| 4412 | SYCP3            | -1.01 | 1.76E-01 | NA       | 16.01    | not significant |
| 4413 | MGAT3            | -1.01 | 2.90E-01 | NA       | 30.20    | not significant |
| 4414 | ELL3             | -1.01 | 3.43E-01 | NA       | 31.04    | not significant |
| 4415 | ZC3H13           | -1.01 | 6.99E-01 | 8.59E-01 | 3889.16  | not significant |
| 4416 | VPS72            | -1.01 | 7.21E-01 | 8.71E-01 | 1280.73  | not significant |
| 4417 | PRKAG1           | -1.01 | 7.19E-01 | 8.70E-01 | 1855.58  | not significant |
| 4418 | PIBF1            | -1.01 | 7.19E-01 | 8.70E-01 | 610.87   | not significant |
| 4419 | ZNF3             | -1.01 | 6.76E-01 | 8.48E-01 | 2571.69  | not significant |
| 4420 | ZC3HAV1          | -1.01 | 7.00E-01 | 8.59E-01 | 7623.94  | not significant |
| 4421 | IL22             | -1.01 | 1.19E-01 | NA       | 11.70    | not significant |
| 4422 | ACSL1            | -1.01 | 7.01E-01 | 8.59E-01 | 390.21   | not significant |
| 4423 | DOK1             | -1.01 | 7.04E-01 | 8.61E-01 | 413.52   | not significant |
| 4424 | MAGI3            | -1.01 | 6.66E-01 | 8.43E-01 | 230.32   | not significant |
| 4425 | NPAS2            | -1.01 | 7.21E-01 | 8.71E-01 | 748.47   | not significant |
| 4426 | IRGQ             | -1.01 | 7.21E-01 | 8.71E-01 | 783.94   | not significant |
| 4427 | CORO1B           | -1.01 | 7.24E-01 | 8.73E-01 | 2181.57  | not significant |
| 4428 | NUDT15           | -1.01 | 7.21E-01 | 8.71E-01 | 1618.17  | not significant |
| 4429 | TEX10            | -1.01 | 7.21E-01 | 8.71E-01 | 1066.83  | not significant |
| 4430 | GIT2             | -1.01 | 7.02E-01 | 8.59E-01 | 3372.79  | not significant |
| 4431 | KMO              | -1.01 | 8.49E-02 | NA       | 10.95    | not significant |
| 4432 | PFKFB1           | -1.01 | 1.93E-01 | NA       | 17.92    | not significant |
| 4433 | DTX2P1-UPK3BP1-I | -1.01 | 5.24E-01 | NA       | 72.93    | not significant |
| 4434 | TLN2             | -1.01 | 4.73E-01 | NA       | 74.78    | not significant |
| 4435 | HSD17B8          | -1.01 | 6.31E-01 | 8.21E-01 | 176.17   | not significant |
| 4436 | PCDH10           | -1.01 | 4.82E-01 | NA       | 61.06    | not significant |
| 4437 | SCML1            | -1.01 | 7.11E-01 | 8.65E-01 | 488.26   | not significant |
| 4438 | TADA1            | -1.01 | 7.24E-01 | 8.73E-01 | 884.39   | not significant |
| 4439 | DHRS4            | -1.01 | 7.17E-01 | 8.69E-01 | 532.89   | not significant |
| 4440 | PLD3             | -1.01 | 7.24E-01 | 8.73E-01 | 953.76   | not significant |
| 4441 | NABP1            | -1.01 | 7.24E-01 | 8.73E-01 | 719.73   | not significant |
| 4442 | YIPF6            | -1.01 | 7.24E-01 | 8.73E-01 | 835.78   | not significant |
| 4443 | KANSL1           | -1.01 | 7.27E-01 | 8.74E-01 | 994.77   | not significant |
| 4444 | TPGS2            | -1.01 | 6.93E-01 | 8.56E-01 | 4486.40  | not significant |
| 4445 | SLC20A2          | -1.01 | 7.23E-01 | 8.73E-01 | 1738.11  | not significant |
| 4446 | RTF1             | -1.01 | 7.01E-01 | 8.59E-01 | 3896.43  | not significant |
| 4447 | NXPE3            | -1.01 | 7.21E-01 | 8.71E-01 | 2032.17  | not significant |
| 4448 | SEC23IP          | -1.01 | 7.05E-01 | 8.61E-01 | 2588.13  | not significant |
| 4449 | LOC100507462     | -1.01 | 3.18E-01 | NA       | 26.93    | not significant |
| 4450 | LOC401010        | -1.01 | 1.20E-01 | NA       | 10.80    | not significant |
| 4451 | BET1L            | -1.01 | 7.28E-01 | 8.75E-01 | 1658.14  | not significant |
| 4452 | TOPORS           | -1.01 | 7.26E-01 | 8.74E-01 | 1503.67  | not significant |
| 4453 | RPS19BP1         | -1.01 | 7.21E-01 | 8.71E-01 | 3608.99  | not significant |
| 4454 | PBX2             | -1.01 | 7.29E-01 | 8.75E-01 | 859.50   | not significant |
| 4455 | FASTKD2          | -1.01 | 6.60E-01 | 8.40E-01 | 1600.85  | not significant |
| 4456 | GNPDA1           | -1.01 | 7.07E-01 | 8.63E-01 | 3278.99  | not significant |
| 4457 | PARP1            | -1.01 | 6.50E-01 | 8.33E-01 | 10609.78 | not significant |
| 4458 | VAV3             | -1.01 | 7.27E-01 | 8.75E-01 | 1603.51  | not significant |
| 4459 | RNF38            | -1.01 | 7.43E-01 | 8.84E-01 | 1655.58  | not significant |
| 4460 | SLC35A2          | -1.01 | 5.26E-01 | NA       | 79.45    | not significant |
| 4461 | SMIM17           | -1.01 | 3.04E-01 | NA       | 24.88    | not significant |
| 4462 | C17orf67         | -1.01 | 6.25E-01 | 8.17E-01 | 143.02   | not significant |
| 4463 | THAP2            | -1.01 | 6.48E-01 | 8.32E-01 | 177.37   | not significant |
| 4464 | FHIT             | -1.01 | 7.23E-01 | 8.72E-01 | 588.95   | not significant |
| 4465 | ZNF213           | -1.01 | 7.19E-01 | 8.70E-01 | 436.98   | not significant |
| 4466 | PPP1R12B         | -1.01 | 7.12E-01 | 8.66E-01 | 673.45   | not significant |
| 4467 | SCAMP2           | -1.01 | 7.29E-01 | 8.76E-01 | 1516.91  | not significant |
| 4468 | GMFB             | -1.01 | 7.14E-01 | 8.67E-01 | 2570.45  | not significant |
| 4469 | FOXK1            | -1.01 | 7.26E-01 | 8.74E-01 | 2611.71  | not significant |
| 4470 | GAK              | -1.01 | 7.12E-01 | 8.65E-01 | 3765.49  | not significant |
| 4471 | C1orf56          | -1.01 | 2.87E-01 | NA       | 23.45    | not significant |
| 4472 | MB               | -1.01 | 2.33E-01 | NA       | 19.84    | not significant |
| 4473 | APOM             | -1.01 | 3.00E-01 | NA       | 27.44    | not significant |
| 4474 | DUSP19           | -1.01 | 6.10E-01 | 8.08E-01 | 133.98   | not significant |
| 4475 | CBR4             | -1.01 | 7.30E-01 | 8.76E-01 | 727.62   | not significant |

|      |              |       |          |          |          |                 |
|------|--------------|-------|----------|----------|----------|-----------------|
| 4476 | TRAF2        | -1.01 | 7.34E-01 | 8.78E-01 | 1225.27  | not significant |
| 4477 | TMEM14B      | -1.01 | 7.30E-01 | 8.76E-01 | 1773.55  | not significant |
| 4478 | TXN          | -1.01 | 7.15E-01 | 8.68E-01 | 5190.87  | not significant |
| 4479 | ABCF3        | -1.01 | 7.31E-01 | 8.77E-01 | 1249.14  | not significant |
| 4480 | RAN          | -1.01 | 7.03E-01 | 8.60E-01 | 29519.84 | not significant |
| 4481 | LMNB1        | -1.01 | 6.45E-01 | 8.31E-01 | 18306.05 | not significant |
| 4482 | RAB22A       | -1.01 | 7.28E-01 | 8.75E-01 | 1643.36  | not significant |
| 4483 | U2AF2        | -1.01 | 6.89E-01 | 8.54E-01 | 20094.68 | not significant |
| 4484 | C5orf51      | -1.01 | 7.32E-01 | 8.77E-01 | 1939.14  | not significant |
| 4485 | PLXNA2       | -1.01 | 1.71E-01 | NA       | 13.63    | not significant |
| 4486 | C6orf52      | -1.01 | 3.72E-01 | NA       | 32.78    | not significant |
| 4487 | SPR          | -1.01 | 5.08E-01 | NA       | 61.16    | not significant |
| 4488 | OASL         | -1.01 | 5.63E-01 | 7.79E-01 | 126.16   | not significant |
| 4489 | GKAP1        | -1.01 | 5.37E-01 | NA       | 71.87    | not significant |
| 4490 | THAP5        | -1.01 | 7.49E-01 | 8.86E-01 | 1669.70  | not significant |
| 4491 | IL7R         | -1.01 | 7.08E-01 | 8.63E-01 | 419.52   | not significant |
| 4492 | MCCC1        | -1.01 | 7.37E-01 | 8.80E-01 | 807.16   | not significant |
| 4493 | C14orf166    | -1.01 | 7.19E-01 | 8.70E-01 | 5590.54  | not significant |
| 4494 | CAT          | -1.01 | 7.21E-01 | 8.71E-01 | 2879.72  | not significant |
| 4495 | ASH1L        | -1.01 | 7.35E-01 | 8.79E-01 | 1792.63  | not significant |
| 4496 | BCL2L11      | -1.01 | 7.37E-01 | 8.80E-01 | 809.11   | not significant |
| 4497 | ZC2HC1C      | -1.01 | 7.16E-02 | NA       | 8.24     | not significant |
| 4498 | LINC00473    | -1.01 | 2.84E-01 | NA       | 23.28    | not significant |
| 4499 | HEYL         | -1.01 | 4.50E-01 | NA       | 45.28    | not significant |
| 4500 | PLXNC1       | -1.01 | 5.27E-01 | NA       | 64.06    | not significant |
| 4501 | ANKFN1       | -1.01 | 6.00E-01 | 8.02E-01 | 426.91   | not significant |
| 4502 | WASH1        | -1.01 | 6.01E-01 | 8.02E-01 | 104.00   | not significant |
| 4503 | STAR10       | -1.01 | 6.24E-01 | 8.16E-01 | 135.77   | not significant |
| 4504 | ITGAV        | -1.01 | 6.55E-01 | 8.37E-01 | 161.99   | not significant |
| 4505 | TXNRD2       | -1.01 | 7.02E-01 | 8.59E-01 | 319.62   | not significant |
| 4506 | PAK4         | -1.01 | 7.38E-01 | 8.80E-01 | 818.93   | not significant |
| 4507 | DCTPP1       | -1.01 | 7.28E-01 | 8.75E-01 | 4377.23  | not significant |
| 4508 | DCAF17       | -1.01 | 6.51E-01 | 8.34E-01 | 1587.19  | not significant |
| 4509 | VEZF1        | -1.01 | 7.21E-01 | 8.71E-01 | 3417.45  | not significant |
| 4510 | ZKSCAN2      | -1.01 | 7.37E-01 | 8.80E-01 | 928.85   | not significant |
| 4511 | SAMD4B       | -1.01 | 7.35E-01 | 8.79E-01 | 1840.13  | not significant |
| 4512 | PPP6C        | -1.01 | 7.10E-01 | 8.64E-01 | 3389.73  | not significant |
| 4513 | EMILIN1      | -1.01 | 4.96E-01 | NA       | 58.68    | not significant |
| 4514 | TCEB3-AS1    | -1.01 | 5.35E-01 | NA       | 67.81    | not significant |
| 4515 | TRIM3        | -1.01 | 4.90E-01 | NA       | 53.08    | not significant |
| 4516 | LOC727896    | -1.01 | 3.11E-01 | NA       | 22.23    | not significant |
| 4517 | CNR2         | -1.01 | 5.14E-01 | NA       | 59.09    | not significant |
| 4518 | FGGY         | -1.01 | 6.71E-01 | 8.46E-01 | 195.03   | not significant |
| 4519 | KIAA0895     | -1.01 | 6.92E-01 | 8.55E-01 | 243.74   | not significant |
| 4520 | LINC00294    | -1.01 | 7.24E-01 | 8.73E-01 | 497.48   | not significant |
| 4521 | PER1         | -1.01 | 7.40E-01 | 8.82E-01 | 1102.63  | not significant |
| 4522 | CNPPD1       | -1.01 | 7.32E-01 | 8.77E-01 | 2176.69  | not significant |
| 4523 | POPDC2       | -1.01 | 2.57E-01 | NA       | 18.88    | not significant |
| 4524 | UACA         | -1.01 | 2.26E-01 | NA       | 16.40    | not significant |
| 4525 | C5orf30      | -1.01 | 4.66E-01 | NA       | 47.19    | not significant |
| 4526 | LOC101927919 | -1.01 | 3.19E-01 | NA       | 25.31    | not significant |
| 4527 | GJC2         | -1.01 | 3.80E-01 | NA       | 29.77    | not significant |
| 4528 | SCN3A        | -1.01 | 5.93E-01 | NA       | 96.13    | not significant |
| 4529 | TTC8         | -1.01 | 6.69E-01 | 8.44E-01 | 148.80   | not significant |
| 4530 | ZNF341       | -1.01 | 6.70E-01 | 8.45E-01 | 211.34   | not significant |
| 4531 | FANCF        | -1.01 | 7.42E-01 | 8.83E-01 | 1196.38  | not significant |
| 4532 | KLF6         | -1.01 | 7.20E-01 | 8.71E-01 | 2852.52  | not significant |
| 4533 | CAPN1        | -1.01 | 7.36E-01 | 8.79E-01 | 4398.99  | not significant |
| 4534 | ZNF655       | -1.01 | 7.45E-01 | 8.84E-01 | 3363.03  | not significant |
| 4535 | NSMAF        | -1.01 | 7.18E-01 | 8.70E-01 | 3820.94  | not significant |
| 4536 | UBE2Q2P1     | -1.01 | 4.06E-01 | NA       | 35.53    | not significant |
| 4537 | AKAP6        | -1.01 | 4.81E-01 | NA       | 47.90    | not significant |
| 4538 | RBM47        | -1.01 | 2.34E-01 | NA       | 17.49    | not significant |
| 4539 | AK9          | -1.01 | 5.93E-01 | NA       | 96.90    | not significant |
| 4540 | RABL2A       | -1.01 | 5.35E-01 | NA       | 70.26    | not significant |
| 4541 | TDRD7        | -1.01 | 6.85E-01 | 8.52E-01 | 211.87   | not significant |
| 4542 | SLC30A4      | -1.01 | 6.78E-01 | 8.49E-01 | 150.58   | not significant |
| 4543 | GGNBP2       | -1.01 | 7.44E-01 | 8.84E-01 | 734.12   | not significant |
| 4544 | ZFP1         | -1.01 | 7.43E-01 | 8.84E-01 | 1490.00  | not significant |
| 4545 | CSTF3        | -1.01 | 7.45E-01 | 8.84E-01 | 1814.26  | not significant |
| 4546 | RAPGEF2      | -1.01 | 7.47E-01 | 8.85E-01 | 1176.57  | not significant |
| 4547 | LEPROTL1     | -1.01 | 7.24E-01 | 8.73E-01 | 3533.61  | not significant |
| 4548 | SLC31A1      | -1.01 | 7.47E-01 | 8.85E-01 | 1426.87  | not significant |
| 4549 | THAP7-AS1    | -1.01 | 3.34E-01 | NA       | 23.94    | not significant |
| 4550 | HIST1H4E     | -1.01 | 4.37E-01 | NA       | 38.49    | not significant |
| 4551 | AMICA1       | -1.01 | 2.26E-01 | NA       | 15.50    | not significant |
| 4552 | LOC101928766 | -1.01 | 6.52E-01 | 8.35E-01 | 145.40   | not significant |
| 4553 | TYRO3        | -1.01 | 6.92E-01 | 8.55E-01 | 441.17   | not significant |
| 4554 | GUSBP1       | -1.01 | 6.99E-01 | 8.59E-01 | 262.12   | not significant |
| 4555 | ORC5         | -1.01 | 7.49E-01 | 8.86E-01 | 1238.15  | not significant |
| 4556 | STXBP5       | -1.01 | 7.31E-01 | 8.77E-01 | 503.87   | not significant |
| 4557 | ZMAT2        | -1.01 | 7.30E-01 | 8.76E-01 | 3074.36  | not significant |
| 4558 | MED6         | -1.01 | 7.49E-01 | 8.86E-01 | 1340.39  | not significant |
| 4559 | ZNF326       | -1.01 | 7.36E-01 | 8.79E-01 | 2622.32  | not significant |
| 4560 | POLR2M       | -1.01 | 5.63E-01 | NA       | 77.20    | not significant |
| 4561 | NUTM2A       | -1.01 | 2.03E-01 | NA       | 16.05    | not significant |
| 4562 | LINC00467    | -1.01 | 5.20E-01 | NA       | 58.01    | not significant |
| 4563 | TRIM44       | -1.01 | 5.11E-01 | NA       | 50.87    | not significant |

|      |              |       |          |          |          |                 |
|------|--------------|-------|----------|----------|----------|-----------------|
| 4564 | TNF          | -1.01 | 4.86E-01 | NA       | 50.22    | not significant |
| 4565 | KCNN3        | -1.01 | 4.21E-01 | NA       | 34.60    | not significant |
| 4566 | EXOSC1       | -1.01 | 7.49E-01 | 8.86E-01 | 835.48   | not significant |
| 4567 | ARL15        | -1.01 | 7.00E-01 | 8.59E-01 | 225.91   | not significant |
| 4568 | C12orf10     | -1.01 | 7.45E-01 | 8.85E-01 | 1538.63  | not significant |
| 4569 | ATP10D       | -1.01 | 7.46E-01 | 8.85E-01 | 583.75   | not significant |
| 4570 | TERF2IP      | -1.01 | 7.36E-01 | 8.79E-01 | 4341.34  | not significant |
| 4571 | MAPK11P1L    | -1.01 | 7.46E-01 | 8.85E-01 | 5645.87  | not significant |
| 4572 | DROSHA       | -1.01 | 7.32E-01 | 8.77E-01 | 3391.57  | not significant |
| 4573 | TNFRSF10A    | -1.01 | 2.33E-01 | NA       | 14.78    | not significant |
| 4574 | C15orf62     | -1.01 | 2.88E-01 | NA       | 18.91    | not significant |
| 4575 | PON1         | -1.01 | 3.91E-01 | NA       | 28.86    | not significant |
| 4576 | ZNF19        | -1.01 | 4.00E-01 | NA       | 33.62    | not significant |
| 4577 | LST1         | -1.01 | 6.25E-01 | 8.17E-01 | 103.96   | not significant |
| 4578 | FAM179A      | -1.01 | 6.91E-01 | 8.54E-01 | 190.33   | not significant |
| 4579 | ZNF14        | -1.01 | 7.29E-01 | 8.76E-01 | 353.15   | not significant |
| 4580 | NDUFB2       | -1.01 | 7.56E-01 | 8.90E-01 | 1725.50  | not significant |
| 4581 | KDM4C        | -1.01 | 7.55E-01 | 8.90E-01 | 1119.37  | not significant |
| 4582 | FAM115A      | -1.01 | 7.52E-01 | 8.88E-01 | 888.09   | not significant |
| 4583 | DCAF16       | -1.01 | 7.54E-01 | 8.89E-01 | 2147.08  | not significant |
| 4584 | GOLPH3       | -1.01 | 7.37E-01 | 8.80E-01 | 3433.50  | not significant |
| 4585 | SETD5        | -1.01 | 7.36E-01 | 8.79E-01 | 5045.20  | not significant |
| 4586 | ZEB1         | -1.01 | 7.41E-01 | 8.82E-01 | 3369.48  | not significant |
| 4587 | CCDC11       | -1.01 | 1.76E-01 | NA       | 11.77    | not significant |
| 4588 | GPC3         | -1.01 | 3.99E-01 | NA       | 29.61    | not significant |
| 4589 | LIPT2        | -1.01 | 5.50E-01 | NA       | 67.26    | not significant |
| 4590 | CRIPAK       | -1.01 | 6.60E-01 | 8.39E-01 | 161.71   | not significant |
| 4591 | GRK4         | -1.01 | 5.70E-01 | NA       | 76.67    | not significant |
| 4592 | FAM131A      | -1.01 | 6.56E-01 | 8.37E-01 | 131.78   | not significant |
| 4593 | BMI1         | -1.01 | 7.08E-01 | 8.63E-01 | 233.38   | not significant |
| 4594 | METAP1D      | -1.01 | 6.96E-01 | 8.58E-01 | 216.99   | not significant |
| 4595 | NMNAT1       | -1.01 | 7.24E-01 | 8.73E-01 | 303.32   | not significant |
| 4596 | SLC35G2      | -1.01 | 7.39E-01 | 8.80E-01 | 366.16   | not significant |
| 4597 | TUSC5        | -1.01 | 7.54E-01 | 8.89E-01 | 571.16   | not significant |
| 4598 | EMILIN2      | -1.01 | 7.57E-01 | 8.91E-01 | 1004.62  | not significant |
| 4599 | GIZ1         | -1.01 | 7.46E-01 | 8.85E-01 | 2384.54  | not significant |
| 4600 | MTMR12       | -1.01 | 7.54E-01 | 8.89E-01 | 1667.85  | not significant |
| 4601 | KLF13        | -1.01 | 7.23E-01 | 8.72E-01 | 4473.53  | not significant |
| 4602 | COLGALT1     | -1.01 | 7.44E-01 | 8.84E-01 | 4298.82  | not significant |
| 4603 | B9D1         | -1.01 | 5.34E-01 | NA       | 60.52    | not significant |
| 4604 | FBXW4P1      | -1.01 | 3.63E-01 | NA       | 26.49    | not significant |
| 4605 | FBXO48       | -1.01 | 6.20E-01 | 8.15E-01 | 125.89   | not significant |
| 4606 | MCM3AP-AS1   | -1.01 | 5.88E-01 | NA       | 93.14    | not significant |
| 4607 | CDIP1        | -1.01 | 7.03E-01 | 8.59E-01 | 285.59   | not significant |
| 4608 | SNPH         | -1.01 | 6.74E-01 | 8.47E-01 | 148.05   | not significant |
| 4609 | PNRC2        | -1.01 | 7.47E-01 | 8.85E-01 | 521.87   | not significant |
| 4610 | ATG14        | -1.01 | 7.40E-01 | 8.81E-01 | 388.41   | not significant |
| 4611 | DNAJB2       | -1.01 | 7.61E-01 | 8.93E-01 | 1083.65  | not significant |
| 4612 | CDK5R1       | -1.01 | 7.16E-01 | 8.69E-01 | 260.88   | not significant |
| 4613 | PRKRA        | -1.01 | 7.61E-01 | 8.93E-01 | 956.19   | not significant |
| 4614 | SMARCAL1     | -1.01 | 7.58E-01 | 8.91E-01 | 1040.51  | not significant |
| 4615 | ITPK1        | -1.01 | 7.47E-01 | 8.85E-01 | 2498.85  | not significant |
| 4616 | PTCD3        | -1.01 | 7.33E-01 | 8.77E-01 | 4759.74  | not significant |
| 4617 | NUCB2        | -1.01 | 6.87E-01 | 8.53E-01 | 20162.43 | not significant |
| 4618 | KCND1        | -1.01 | 1.60E-01 | NA       | 10.86    | not significant |
| 4619 | TLR5         | -1.01 | 3.87E-01 | NA       | 30.92    | not significant |
| 4620 | ACSL6        | -1.01 | 5.30E-01 | NA       | 58.98    | not significant |
| 4621 | ZBTB8OS      | -1.01 | 7.44E-01 | 8.84E-01 | 450.47   | not significant |
| 4622 | LOC101927045 | -1.01 | 5.44E-01 | NA       | 69.88    | not significant |
| 4623 | SERPINF1     | -1.01 | 7.44E-01 | 8.84E-01 | 369.56   | not significant |
| 4624 | ZNF527       | -1.01 | 7.57E-01 | 8.91E-01 | 491.34   | not significant |
| 4625 | EMC7         | -1.01 | 7.62E-01 | 8.94E-01 | 1118.15  | not significant |
| 4626 | LANCL2       | -1.01 | 7.63E-01 | 8.94E-01 | 869.18   | not significant |
| 4627 | GBAS         | -1.01 | 7.50E-01 | 8.87E-01 | 2328.57  | not significant |
| 4628 | C10orf76     | -1.01 | 7.61E-01 | 8.93E-01 | 1363.01  | not significant |
| 4629 | MORC3        | -1.01 | 7.52E-01 | 8.88E-01 | 2331.62  | not significant |
| 4630 | CCNT1        | -1.01 | 7.48E-01 | 8.85E-01 | 4448.25  | not significant |
| 4631 | INTS2        | -1.01 | 7.49E-01 | 8.86E-01 | 3933.91  | not significant |
| 4632 | TMEM43       | -1.01 | 7.48E-01 | 8.86E-01 | 2515.16  | not significant |
| 4633 | KIF9-AS1     | -1.01 | 3.39E-01 | NA       | 22.15    | not significant |
| 4634 | YBX2         | -1.01 | 2.06E-01 | NA       | 11.94    | not significant |
| 4635 | GSTM4        | -1.01 | 5.82E-01 | NA       | 78.24    | not significant |
| 4636 | HYAL2        | -1.01 | 5.93E-01 | NA       | 74.53    | not significant |
| 4637 | ARMC9        | -1.01 | 6.49E-01 | 8.32E-01 | 120.60   | not significant |
| 4638 | CBLB         | -1.01 | 7.21E-01 | 8.71E-01 | 261.00   | not significant |
| 4639 | EOMES        | -1.01 | 7.38E-01 | 8.80E-01 | 325.96   | not significant |
| 4640 | C14orf2      | -1.01 | 7.60E-01 | 8.93E-01 | 3122.62  | not significant |
| 4641 | TMEM201      | -1.01 | 7.58E-01 | 8.91E-01 | 2241.55  | not significant |
| 4642 | ADCY10P1     | -1.01 | 5.42E-01 | NA       | 55.09    | not significant |
| 4643 | SHF          | -1.01 | 4.92E-01 | NA       | 42.86    | not significant |
| 4644 | SLC25A43     | -1.01 | 6.12E-01 | NA       | 93.87    | not significant |
| 4645 | CYTH3        | -1.01 | 6.10E-01 | NA       | 82.17    | not significant |
| 4646 | CKMT2-AS1    | -1.01 | 6.73E-01 | 8.47E-01 | 138.89   | not significant |
| 4647 | CPTP         | -1.01 | 7.51E-01 | 8.88E-01 | 430.22   | not significant |
| 4648 | LSM14A       | -1.01 | 6.71E-01 | 8.46E-01 | 1585.18  | not significant |
| 4649 | ENSA         | -1.01 | 7.54E-01 | 8.89E-01 | 6371.93  | not significant |
| 4650 | PHF6         | -1.01 | 7.52E-01 | 8.88E-01 | 4332.21  | not significant |
| 4651 | TXNDC12      | -1.01 | 7.49E-01 | 8.86E-01 | 3170.24  | not significant |



|      |              |       |          |          |         |                 |
|------|--------------|-------|----------|----------|---------|-----------------|
| 4652 | BMP2K        | -1.01 | 7.63E-01 | 8.94E-01 | 1628.29 | not significant |
| 4653 | TSPAN10      | -1.01 | 1.73E-01 | NA       | 10.67   | not significant |
| 4654 | TMEM184A     | -1.01 | 2.37E-01 | NA       | 19.47   | not significant |
| 4655 | VPREB1       | -1.01 | 2.24E-01 | NA       | 13.00   | not significant |
| 4656 | RNF219-AS1   | -1.01 | 2.80E-01 | NA       | 20.52   | not significant |
| 4657 | EBLN2        | -1.01 | 5.70E-01 | NA       | 61.69   | not significant |
| 4658 | LOC399815    | -1.01 | 6.69E-01 | 8.44E-01 | 129.03  | not significant |
| 4659 | CUBN         | -1.01 | 5.78E-01 | NA       | 64.52   | not significant |
| 4660 | TIMP2        | -1.01 | 6.87E-01 | 8.53E-01 | 162.30  | not significant |
| 4661 | PRDX4        | -1.01 | 7.70E-01 | 8.98E-01 | 1429.49 | not significant |
| 4662 | FAM114A2     | -1.01 | 7.66E-01 | 8.96E-01 | 734.02  | not significant |
| 4663 | PGAP1        | -1.01 | 7.62E-01 | 8.94E-01 | 909.84  | not significant |
| 4664 | RHNO1        | -1.01 | 7.66E-01 | 8.96E-01 | 2431.96 | not significant |
| 4665 | UBE2I        | -1.01 | 7.55E-01 | 8.90E-01 | 7315.19 | not significant |
| 4666 | THUMP1       | -1.01 | 7.52E-01 | 8.88E-01 | 3369.61 | not significant |
| 4667 | GNPTAB       | -1.01 | 7.49E-01 | 8.86E-01 | 8286.93 | not significant |
| 4668 | FOXO4        | -1.01 | 1.72E-01 | NA       | 10.38   | not significant |
| 4669 | DNAH11       | -1.01 | 2.83E-01 | NA       | 18.03   | not significant |
| 4670 | SPEF1        | -1.01 | 2.79E-01 | NA       | 15.42   | not significant |
| 4671 | RNF208       | -1.01 | 2.61E-01 | NA       | 14.60   | not significant |
| 4672 | POU4F1       | -1.01 | 4.38E-01 | NA       | 31.35   | not significant |
| 4673 | LOC100132077 | -1.01 | 4.63E-01 | NA       | 34.95   | not significant |
| 4674 | ZNF688       | -1.01 | 6.84E-01 | 8.52E-01 | 170.07  | not significant |
| 4675 | FUT11        | -1.01 | 5.39E-01 | NA       | 49.91   | not significant |
| 4676 | RNF181       | -1.01 | 7.63E-01 | 8.94E-01 | 876.39  | not significant |
| 4677 | MOC53        | -1.01 | 7.66E-01 | 8.96E-01 | 425.04  | not significant |
| 4678 | METTL14      | -1.01 | 7.73E-01 | 9.00E-01 | 1042.46 | not significant |
| 4679 | ATAD3B       | -1.01 | 7.73E-01 | 9.00E-01 | 1292.09 | not significant |
| 4680 | JAM3         | -1.01 | 7.57E-01 | 8.91E-01 | 3219.22 | not significant |
| 4681 | PFKP         | -1.01 | 7.37E-01 | 8.80E-01 | 5426.04 | not significant |
| 4682 | ITGB5        | -1.01 | 2.35E-01 | NA       | 13.53   | not significant |
| 4683 | DUSP5        | -1.01 | 3.43E-01 | NA       | 19.70   | not significant |
| 4684 | LPCAT2       | -1.01 | 4.84E-01 | NA       | 42.87   | not significant |
| 4685 | POLR2L       | -1.01 | 7.45E-01 | 8.85E-01 | 3175.39 | not significant |
| 4686 | ZNF772       | -1.01 | 7.16E-01 | 8.68E-01 | 658.24  | not significant |
| 4687 | OSGEPL1      | -1.01 | 7.69E-01 | 8.97E-01 | 463.04  | not significant |
| 4688 | ASNA1        | -1.01 | 7.77E-01 | 9.02E-01 | 2220.57 | not significant |
| 4689 | COG6         | -1.01 | 7.74E-01 | 9.00E-01 | 769.78  | not significant |
| 4690 | RPIA         | -1.01 | 7.58E-01 | 8.91E-01 | 3482.89 | not significant |
| 4691 | ANKLE1       | -1.01 | 7.72E-01 | 8.99E-01 | 1759.84 | not significant |
| 4692 | EXOC1        | -1.01 | 7.75E-01 | 9.01E-01 | 848.06  | not significant |
| 4693 | SLC25A23     | -1.01 | 7.76E-01 | 9.01E-01 | 1041.36 | not significant |
| 4694 | FZD6         | -1.01 | 7.67E-01 | 8.97E-01 | 2991.50 | not significant |
| 4695 | LRR17        | -1.01 | 2.24E-01 | NA       | 11.80   | not significant |
| 4696 | PLAU         | -1.01 | 3.63E-01 | NA       | 22.46   | not significant |
| 4697 | ZNF287       | -1.01 | 7.42E-01 | 8.83E-01 | 277.65  | not significant |
| 4698 | CENPK        | -1.01 | 7.96E-01 | 9.12E-01 | 1555.43 | not significant |
| 4699 | FAM96B       | -1.01 | 7.78E-01 | 9.03E-01 | 2466.59 | not significant |
| 4700 | ANXA4        | -1.01 | 7.74E-01 | 9.00E-01 | 575.63  | not significant |
| 4701 | PGM3         | -1.01 | 7.64E-01 | 8.95E-01 | 469.35  | not significant |
| 4702 | IST1         | -1.01 | 7.59E-01 | 8.92E-01 | 3778.22 | not significant |
| 4703 | SMAD2        | -1.01 | 7.60E-01 | 8.93E-01 | 3633.33 | not significant |
| 4704 | CD82         | -1.01 | 7.26E-01 | 8.74E-01 | 7929.16 | not significant |
| 4705 | MBNL3        | -1.01 | 7.74E-01 | 9.00E-01 | 4771.80 | not significant |
| 4706 | GAS5-AS1     | -1.01 | 3.25E-01 | NA       | 18.54   | not significant |
| 4707 | EFCAB13      | -1.01 | 6.63E-01 | 8.41E-01 | 123.26  | not significant |
| 4708 | CYP19A1      | -1.01 | 5.86E-01 | NA       | 62.39   | not significant |
| 4709 | IFT20        | -1.01 | 6.77E-01 | 8.49E-01 | 117.73  | not significant |
| 4710 | TNRC6C-AS1   | -1.01 | 7.21E-01 | 8.71E-01 | 184.62  | not significant |
| 4711 | SKA1         | -1.01 | 7.46E-01 | 8.85E-01 | 275.29  | not significant |
| 4712 | SH3YL1       | -1.01 | 7.68E-01 | 8.97E-01 | 481.11  | not significant |
| 4713 | WBP4         | -1.01 | 7.82E-01 | 9.05E-01 | 1141.14 | not significant |
| 4714 | KLHL28       | -1.01 | 7.79E-01 | 9.03E-01 | 786.13  | not significant |
| 4715 | C7orf49      | -1.01 | 7.74E-01 | 9.00E-01 | 2140.20 | not significant |
| 4716 | GINS1        | -1.01 | 7.59E-01 | 8.92E-01 | 4011.40 | not significant |
| 4717 | SLC25A38     | -1.01 | 8.17E-01 | 9.24E-01 | 3249.75 | not significant |
| 4718 | HS2ST1       | -1.01 | 9.32E-01 | 9.75E-01 | 3329.14 | not significant |
| 4719 | MCMDC2       | -1.01 | 2.56E-01 | NA       | 15.17   | not significant |
| 4720 | CDH26        | -1.01 | 2.35E-01 | NA       | 14.44   | not significant |
| 4721 | POU2F2       | -1.01 | 6.57E-01 | 8.38E-01 | 104.27  | not significant |
| 4722 | CHST15       | -1.01 | 4.43E-01 | NA       | 29.12   | not significant |
| 4723 | ENOX1        | -1.01 | 6.00E-01 | NA       | 62.77   | not significant |
| 4724 | HIST1H2AM    | -1.01 | 5.06E-01 | NA       | 38.06   | not significant |
| 4725 | ZNF720       | -1.01 | 7.53E-01 | 8.89E-01 | 311.99  | not significant |
| 4726 | MTX2         | -1.01 | 7.84E-01 | 9.07E-01 | 973.82  | not significant |
| 4727 | CYB5R4       | -1.01 | 7.84E-01 | 9.07E-01 | 1048.47 | not significant |
| 4728 | FAM73A       | -1.01 | 7.82E-01 | 9.05E-01 | 631.61  | not significant |
| 4729 | EDRF1        | -1.01 | 7.36E-01 | 8.79E-01 | 1594.98 | not significant |
| 4730 | DDX26B       | -1.01 | 7.30E-01 | 8.76E-01 | 229.08  | not significant |
| 4731 | SUMO1        | -1.01 | 7.67E-01 | 8.96E-01 | 4114.45 | not significant |
| 4732 | BRD7         | -1.01 | 7.69E-01 | 8.98E-01 | 3004.20 | not significant |
| 4733 | ZNF681       | -1.01 | 7.82E-01 | 9.05E-01 | 817.22  | not significant |
| 4734 | THEMIS2      | -1.01 | 3.72E-01 | NA       | 20.34   | not significant |
| 4735 | SLC14A2      | -1.01 | 3.57E-01 | NA       | 18.97   | not significant |
| 4736 | LOC257396    | -1.01 | 5.51E-01 | NA       | 57.87   | not significant |
| 4737 | TNFSF9       | -1.01 | 6.70E-01 | 8.45E-01 | 105.88  | not significant |
| 4738 | IL17RE       | -1.01 | 7.33E-01 | 8.77E-01 | 214.99  | not significant |
| 4739 | DGUOK-AS1    | -1.01 | 5.07E-01 | NA       | 37.21   | not significant |

|      |              |       |          |          |          |                 |
|------|--------------|-------|----------|----------|----------|-----------------|
| 4740 | WDR18        | -1.01 | 7.85E-01 | 9.07E-01 | 2148.44  | not significant |
| 4741 | VWA9         | -1.01 | 7.83E-01 | 9.06E-01 | 1738.76  | not significant |
| 4742 | PSMA3        | -1.01 | 7.72E-01 | 8.99E-01 | 5766.42  | not significant |
| 4743 | ST3GAL4      | -1.01 | 7.88E-01 | 9.09E-01 | 1174.63  | not significant |
| 4744 | SP140L       | -1.01 | 7.86E-01 | 9.07E-01 | 1210.52  | not significant |
| 4745 | LRP8         | -1.01 | 7.79E-01 | 9.03E-01 | 3059.31  | not significant |
| 4746 | MLX          | -1.01 | 8.01E-01 | 9.14E-01 | 2951.69  | not significant |
| 4747 | CKAP2        | -1.01 | 7.68E-01 | 8.97E-01 | 3623.62  | not significant |
| 4748 | PML          | -1.01 | 7.78E-01 | 9.03E-01 | 2367.14  | not significant |
| 4749 | EPRS         | -1.01 | 8.01E-01 | 9.14E-01 | 7389.70  | not significant |
| 4750 | GPT          | -1.01 | 1.99E-01 | NA       | 9.65     | not significant |
| 4751 | SHROOM1      | -1.01 | 5.39E-01 | NA       | 43.20    | not significant |
| 4752 | METTL12      | -1.01 | 6.59E-01 | NA       | 96.99    | not significant |
| 4753 | LOC101928103 | -1.01 | 6.13E-01 | NA       | 64.21    | not significant |
| 4754 | BOLA3-AS1    | -1.01 | 3.23E-01 | NA       | 16.42    | not significant |
| 4755 | EPHA1        | -1.01 | 6.46E-01 | NA       | 88.76    | not significant |
| 4756 | ZNF461       | -1.01 | 7.46E-01 | 8.85E-01 | 234.87   | not significant |
| 4757 | UQCRLH       | -1.01 | 7.68E-01 | 8.97E-01 | 417.45   | not significant |
| 4758 | NDUFC1       | -1.01 | 7.31E-01 | 8.77E-01 | 944.55   | not significant |
| 4759 | CROT         | -1.01 | 7.85E-01 | 9.07E-01 | 603.94   | not significant |
| 4760 | WDR55        | -1.01 | 7.90E-01 | 9.09E-01 | 1197.80  | not significant |
| 4761 | EIF3K        | -1.01 | 7.75E-01 | 9.01E-01 | 5056.63  | not significant |
| 4762 | GGH          | -1.01 | 7.89E-01 | 9.09E-01 | 1408.40  | not significant |
| 4763 | ZNF816       | -1.01 | 7.72E-01 | 8.99E-01 | 449.87   | not significant |
| 4764 | RNASEH2B-AS1 | -1.01 | 2.07E-01 | NA       | 9.72     | not significant |
| 4765 | KLHL31       | -1.01 | 2.58E-01 | NA       | 11.86    | not significant |
| 4766 | SLC7A7       | -1.01 | 1.79E-01 | NA       | 8.96     | not significant |
| 4767 | SCRN1        | -1.01 | 5.97E-01 | NA       | 66.36    | not significant |
| 4768 | HIST1H2AJ    | -1.01 | 3.93E-01 | NA       | 21.69    | not significant |
| 4769 | TLR7         | -1.01 | 3.06E-01 | NA       | 14.77    | not significant |
| 4770 | SLC27A3      | -1.01 | 2.52E-01 | NA       | 12.93    | not significant |
| 4771 | TMPRSS13     | -1.01 | 5.84E-01 | NA       | 54.52    | not significant |
| 4772 | VAMP8        | -1.01 | 7.76E-01 | 9.01E-01 | 461.27   | not significant |
| 4773 | FLJ42627     | -1.01 | 6.70E-01 | 8.45E-01 | 123.07   | not significant |
| 4774 | RHBDP2       | -1.01 | 7.18E-01 | 8.70E-01 | 167.75   | not significant |
| 4775 | MPI          | -1.01 | 7.88E-01 | 9.09E-01 | 637.69   | not significant |
| 4776 | TMCO6        | -1.01 | 7.87E-01 | 9.08E-01 | 667.18   | not significant |
| 4777 | ABI3         | -1.01 | 7.95E-01 | 9.12E-01 | 1655.38  | not significant |
| 4778 | NAA35        | -1.01 | 7.88E-01 | 9.09E-01 | 1076.65  | not significant |
| 4779 | DHFR         | -1.01 | 7.83E-01 | 9.06E-01 | 2997.72  | not significant |
| 4780 | STAT4        | -1.01 | 7.88E-01 | 9.09E-01 | 1599.58  | not significant |
| 4781 | CBX3         | -1.01 | 7.58E-01 | 8.91E-01 | 13987.91 | not significant |
| 4782 | POLR3E       | -1.01 | 7.83E-01 | 9.06E-01 | 2204.81  | not significant |
| 4783 | TRPM2        | -1.01 | 7.94E-01 | 9.11E-01 | 1640.53  | not significant |
| 4784 | INCA1        | -1.01 | 3.67E-01 | NA       | 18.84    | not significant |
| 4785 | SPAG5-AS1    | -1.01 | 2.88E-01 | NA       | 14.02    | not significant |
| 4786 | RAD21-AS1    | -1.01 | 3.54E-01 | NA       | 19.06    | not significant |
| 4787 | BEND3        | -1.01 | 3.22E-01 | NA       | 15.26    | not significant |
| 4788 | LOC100130691 | -1.01 | 2.76E-01 | NA       | 14.01    | not significant |
| 4789 | TAPT1-AS1    | -1.01 | 5.29E-01 | NA       | 45.83    | not significant |
| 4790 | ACOT11       | -1.01 | 6.24E-01 | NA       | 72.00    | not significant |
| 4791 | CYFIP1       | -1.01 | 6.85E-01 | 8.52E-01 | 155.31   | not significant |
| 4792 | CAMKMT       | -1.01 | 7.48E-01 | 8.86E-01 | 207.31   | not significant |
| 4793 | SMIM15       | -1.01 | 7.49E-01 | 8.86E-01 | 272.04   | not significant |
| 4794 | ISOC2        | -1.01 | 7.96E-01 | 9.12E-01 | 1660.44  | not significant |
| 4795 | VPS28        | -1.01 | 8.02E-01 | 9.15E-01 | 1080.13  | not significant |
| 4796 | TRAPPC6B     | -1.01 | 7.95E-01 | 9.12E-01 | 1324.77  | not significant |
| 4797 | NUDT22       | -1.01 | 7.90E-01 | 9.09E-01 | 773.10   | not significant |
| 4798 | SSX2IP       | -1.01 | 7.96E-01 | 9.12E-01 | 1230.06  | not significant |
| 4799 | PRDM15       | -1.01 | 7.88E-01 | 9.09E-01 | 619.55   | not significant |
| 4800 | TM8SF2       | -1.01 | 7.67E-01 | 8.96E-01 | 7094.03  | not significant |
| 4801 | CHTOP        | -1.01 | 9.58E-01 | 9.85E-01 | 3289.80  | not significant |
| 4802 | CRYM-AS1     | -1.01 | 3.69E-01 | NA       | 18.62    | not significant |
| 4803 | RAET1E       | -1.01 | 4.98E-01 | NA       | 32.81    | not significant |
| 4804 | GPR89B       | -1.01 | 2.36E-01 | NA       | 10.28    | not significant |
| 4805 | ZNF878       | -1.01 | 5.41E-01 | NA       | 41.34    | not significant |
| 4806 | TNFAIP8L2    | -1.01 | 4.94E-01 | NA       | 34.40    | not significant |
| 4807 | TNNT1        | -1.01 | 6.31E-01 | NA       | 67.71    | not significant |
| 4808 | C2orf69      | -1.01 | 7.95E-01 | 9.12E-01 | 752.85   | not significant |
| 4809 | PSMB6        | -1.01 | 7.97E-01 | 9.12E-01 | 3573.06  | not significant |
| 4810 | MAGED1       | -1.01 | 7.97E-01 | 9.12E-01 | 1046.97  | not significant |
| 4811 | ASB1         | -1.01 | 7.95E-01 | 9.12E-01 | 1223.09  | not significant |
| 4812 | TMEM127      | -1.01 | 7.96E-01 | 9.12E-01 | 1939.84  | not significant |
| 4813 | NFYA         | -1.01 | 7.68E-01 | 8.97E-01 | 4810.71  | not significant |
| 4814 | PRKAR1A      | -1.01 | 7.58E-01 | 8.91E-01 | 9341.71  | not significant |
| 4815 | CTDSPL2      | -1.01 | 7.91E-01 | 9.10E-01 | 3823.57  | not significant |
| 4816 | ZMYM3        | -1.01 | 8.98E-01 | 9.62E-01 | 2985.37  | not significant |
| 4817 | IL2RA        | -1.01 | 5.28E-01 | NA       | 36.35    | not significant |
| 4818 | KLHL41       | -1.01 | 2.27E-01 | NA       | 10.84    | not significant |
| 4819 | ID1          | -1.01 | 3.05E-01 | NA       | 13.37    | not significant |
| 4820 | FADS3        | -1.01 | 6.49E-01 | NA       | 80.25    | not significant |
| 4821 | MBD5         | -1.01 | 7.66E-01 | 8.96E-01 | 256.33   | not significant |
| 4822 | PCBD1        | -1.01 | 7.65E-01 | 8.95E-01 | 301.75   | not significant |
| 4823 | GPR176       | -1.01 | 7.41E-01 | 8.82E-01 | 194.89   | not significant |
| 4824 | MED19        | -1.01 | 7.89E-01 | 9.09E-01 | 530.20   | not significant |
| 4825 | NR1D1        | -1.01 | 7.91E-01 | 9.10E-01 | 497.58   | not significant |
| 4826 | ARSK         | -1.01 | 7.86E-01 | 9.08E-01 | 403.81   | not significant |
| 4827 | ZNF766       | -1.01 | 7.99E-01 | 9.13E-01 | 1026.66  | not significant |

|      |              |       |          |          |          |                 |
|------|--------------|-------|----------|----------|----------|-----------------|
| 4828 | SRRM1        | -1.01 | 7.67E-01 | 8.97E-01 | 5467.12  | not significant |
| 4829 | PCDHGB3      | -1.00 | 1.67E-01 | NA       | 7.97     | not significant |
| 4830 | IL13         | -1.00 | 1.88E-01 | NA       | 8.30     | not significant |
| 4831 | PATL2        | -1.00 | 2.23E-01 | NA       | 9.49     | not significant |
| 4832 | GRHL1        | -1.00 | 5.23E-01 | NA       | 39.28    | not significant |
| 4833 | TINCR        | -1.00 | 4.72E-01 | NA       | 27.97    | not significant |
| 4834 | LAMB2P1      | -1.00 | 3.24E-01 | NA       | 14.52    | not significant |
| 4835 | TMEM200B     | -1.00 | 3.40E-01 | NA       | 15.88    | not significant |
| 4836 | LRP1         | -1.00 | 3.86E-01 | NA       | 19.23    | not significant |
| 4837 | LOC101926943 | -1.00 | 3.52E-01 | NA       | 19.73    | not significant |
| 4838 | STARD4-AS1   | -1.00 | 5.04E-01 | NA       | 33.90    | not significant |
| 4839 | MSANTD3      | -1.00 | 7.42E-01 | 8.83E-01 | 188.59   | not significant |
| 4840 | FLJ38122     | -1.00 | 6.98E-01 | 8.59E-01 | 108.00   | not significant |
| 4841 | GLI1         | -1.00 | 5.68E-01 | NA       | 47.23    | not significant |
| 4842 | WDPCP        | -1.00 | 7.27E-01 | 8.74E-01 | 164.08   | not significant |
| 4843 | AJUBA        | -1.00 | 7.85E-01 | 9.07E-01 | 367.62   | not significant |
| 4844 | ELL          | -1.00 | 8.01E-01 | 9.14E-01 | 1077.37  | not significant |
| 4845 | LOC102723885 | -1.00 | 1.77E-01 | NA       | 8.60     | not significant |
| 4846 | EPB41L4B     | -1.00 | 3.38E-01 | NA       | 15.71    | not significant |
| 4847 | FAM71E1      | -1.00 | 4.06E-01 | NA       | 19.37    | not significant |
| 4848 | MAML2        | -1.00 | 5.08E-01 | NA       | 30.18    | not significant |
| 4849 | CIDEB        | -1.00 | 3.48E-01 | NA       | 15.17    | not significant |
| 4850 | GPR135       | -1.00 | 3.01E-01 | NA       | 14.24    | not significant |
| 4851 | FAM63A       | -1.00 | 4.89E-01 | NA       | 33.02    | not significant |
| 4852 | PRR34-AS1    | -1.00 | 7.33E-01 | 8.77E-01 | 120.47   | not significant |
| 4853 | ABHD6        | -1.00 | 7.68E-01 | 8.97E-01 | 255.92   | not significant |
| 4854 | DSTYK        | -1.00 | 7.60E-01 | 8.93E-01 | 231.40   | not significant |
| 4855 | LOC101927151 | -1.00 | 8.06E-01 | 9.17E-01 | 549.86   | not significant |
| 4856 | CHCHD1       | -1.00 | 8.06E-01 | 9.17E-01 | 1002.69  | not significant |
| 4857 | SEC61G       | -1.00 | 8.59E-01 | 9.43E-01 | 1792.16  | not significant |
| 4858 | LAMTOR3      | -1.00 | 8.05E-01 | 9.16E-01 | 1399.69  | not significant |
| 4859 | CEP63        | -1.00 | 8.07E-01 | 9.17E-01 | 1329.45  | not significant |
| 4860 | RPL6         | -1.00 | 7.94E-01 | 9.11E-01 | 16507.15 | not significant |
| 4861 | PGGT1B       | -1.00 | 8.05E-01 | 9.17E-01 | 803.18   | not significant |
| 4862 | STAMBPL1     | -1.00 | 8.18E-01 | 9.24E-01 | 1736.01  | not significant |
| 4863 | USP33        | -1.00 | 8.00E-01 | 9.14E-01 | 2229.52  | not significant |
| 4864 | CHEK1        | -1.00 | 7.79E-01 | 9.03E-01 | 5747.22  | not significant |
| 4865 | FBXL19       | -1.00 | 8.01E-01 | 9.14E-01 | 3632.33  | not significant |
| 4866 | CANT1        | -1.00 | 7.83E-01 | 9.06E-01 | 4954.35  | not significant |
| 4867 | LOC341056    | -1.00 | 4.19E-01 | NA       | 19.51    | not significant |
| 4868 | SDCBP2-AS1   | -1.00 | 6.22E-01 | NA       | 55.80    | not significant |
| 4869 | RNU6-2       | -1.00 | 3.39E-01 | NA       | 14.03    | not significant |
| 4870 | KLHL7-AS1    | -1.00 | 5.26E-01 | NA       | 34.37    | not significant |
| 4871 | BPHL         | -1.00 | 7.63E-01 | 8.94E-01 | 212.33   | not significant |
| 4872 | MDN1         | -1.00 | 7.78E-01 | 9.03E-01 | 5278.09  | not significant |
| 4873 | CDC34        | -1.00 | 8.08E-01 | 9.18E-01 | 1044.29  | not significant |
| 4874 | FLOT2        | -1.00 | 7.98E-01 | 9.13E-01 | 535.60   | not significant |
| 4875 | MRPL37       | -1.00 | 7.93E-01 | 9.11E-01 | 5316.42  | not significant |
| 4876 | MCRS1        | -1.00 | 7.96E-01 | 9.12E-01 | 3618.86  | not significant |
| 4877 | RRAGA        | -1.00 | 8.06E-01 | 9.17E-01 | 1114.91  | not significant |
| 4878 | ZNF865       | -1.00 | 8.06E-01 | 9.17E-01 | 755.82   | not significant |
| 4879 | DHX36        | -1.00 | 8.00E-01 | 9.14E-01 | 2685.37  | not significant |
| 4880 | SLC9A7       | -1.00 | 7.81E-01 | 9.05E-01 | 340.92   | not significant |
| 4881 | FAM53B       | -1.00 | 8.01E-01 | 9.14E-01 | 2165.88  | not significant |
| 4882 | KIAA1551     | -1.00 | 8.03E-01 | 9.15E-01 | 3430.67  | not significant |
| 4883 | HSD11B1L     | -1.00 | 4.82E-01 | NA       | 25.64    | not significant |
| 4884 | SLAMF8       | -1.00 | 3.20E-01 | NA       | 12.60    | not significant |
| 4885 | BNIPL        | -1.00 | 4.13E-01 | NA       | 22.12    | not significant |
| 4886 | HIF1A-AS2    | -1.00 | 2.71E-01 | NA       | 11.86    | not significant |
| 4887 | ZNF157       | -1.00 | 5.07E-01 | NA       | 28.52    | not significant |
| 4888 | DRICH1       | -1.00 | 2.77E-01 | NA       | 10.85    | not significant |
| 4889 | PYGM         | -1.00 | 5.69E-01 | NA       | 51.21    | not significant |
| 4890 | EFCAB12      | -1.00 | 3.94E-01 | NA       | 19.36    | not significant |
| 4891 | CAMSAP2      | -1.00 | 4.58E-01 | NA       | 25.28    | not significant |
| 4892 | NR5A1        | -1.00 | 4.27E-01 | NA       | 21.50    | not significant |
| 4893 | PHLDA1       | -1.00 | 6.62E-01 | NA       | 71.20    | not significant |
| 4894 | MIR497HG     | -1.00 | 3.65E-01 | NA       | 17.52    | not significant |
| 4895 | ZNF597       | -1.00 | 6.99E-01 | 8.59E-01 | 110.59   | not significant |
| 4896 | LOC100507217 | -1.00 | 8.01E-01 | 9.14E-01 | 673.38   | not significant |
| 4897 | PPFIA3       | -1.00 | 7.80E-01 | 9.04E-01 | 264.03   | not significant |
| 4898 | CTNS         | -1.00 | 8.00E-01 | 9.14E-01 | 661.82   | not significant |
| 4899 | F11R         | -1.00 | 8.00E-01 | 9.14E-01 | 443.96   | not significant |
| 4900 | TRMT112      | -1.00 | 8.10E-01 | 9.19E-01 | 3287.01  | not significant |
| 4901 | METTL8       | -1.00 | 8.10E-01 | 9.19E-01 | 874.82   | not significant |
| 4902 | DNAJC21      | -1.00 | 8.09E-01 | 9.18E-01 | 1927.71  | not significant |
| 4903 | ZNF589       | -1.00 | 8.02E-01 | 9.15E-01 | 681.19   | not significant |
| 4904 | AP3M2        | -1.00 | 8.09E-01 | 9.18E-01 | 1505.60  | not significant |
| 4905 | FOXK2        | -1.00 | 7.67E-01 | 8.97E-01 | 7265.76  | not significant |
| 4906 | MMRN1        | -1.00 | 2.77E-01 | NA       | 10.31    | not significant |
| 4907 | FOXN3-AS1    | -1.00 | 5.10E-01 | NA       | 30.83    | not significant |
| 4908 | NPM2         | -1.00 | 3.67E-01 | NA       | 14.82    | not significant |
| 4909 | TANC1        | -1.00 | 2.84E-01 | NA       | 11.65    | not significant |
| 4910 | ARMCX3       | -1.00 | 7.18E-01 | 8.70E-01 | 118.14   | not significant |
| 4911 | MAP2K6       | -1.00 | 8.07E-01 | 9.17E-01 | 466.32   | not significant |
| 4912 | PPIE         | -1.00 | 8.13E-01 | 9.21E-01 | 1588.15  | not significant |
| 4913 | FAM83G       | -1.00 | 7.63E-01 | 8.94E-01 | 206.89   | not significant |
| 4914 | CLTB         | -1.00 | 8.14E-01 | 9.21E-01 | 1336.18  | not significant |
| 4915 | RPS6KA1      | -1.00 | 7.82E-01 | 9.05E-01 | 4495.16  | not significant |

|      |            |       |          |          |          |                 |
|------|------------|-------|----------|----------|----------|-----------------|
| 4916 | CMIP       | -1.00 | 7.97E-01 | 9.12E-01 | 3395.47  | not significant |
| 4917 | ATP1A1     | -1.00 | 7.76E-01 | 9.02E-01 | 24640.30 | not significant |
| 4918 | ATP1B2     | -1.00 | 2.36E-01 | NA       | 9.04     | not significant |
| 4919 | MPP7       | -1.00 | 4.89E-01 | NA       | 24.63    | not significant |
| 4920 | PRSS57     | -1.00 | 5.68E-01 | NA       | 39.69    | not significant |
| 4921 | ARHGEF11   | -1.00 | 6.49E-01 | NA       | 66.41    | not significant |
| 4922 | CAPS2      | -1.00 | 7.03E-01 | 8.59E-01 | 101.92   | not significant |
| 4923 | ARPP21     | -1.00 | 7.98E-01 | 9.12E-01 | 352.08   | not significant |
| 4924 | PDE1B      | -1.00 | 7.98E-01 | 9.13E-01 | 461.34   | not significant |
| 4925 | FTSJ1      | -1.00 | 8.14E-01 | 9.22E-01 | 760.95   | not significant |
| 4926 | TAF1A      | -1.00 | 8.10E-01 | 9.19E-01 | 641.50   | not significant |
| 4927 | CES2       | -1.00 | 8.17E-01 | 9.24E-01 | 1347.60  | not significant |
| 4928 | FRMD8      | -1.00 | 8.13E-01 | 9.21E-01 | 1742.44  | not significant |
| 4929 | OSBP       | -1.00 | 8.05E-01 | 9.16E-01 | 3340.93  | not significant |
| 4930 | SMKR1      | -1.00 | 4.70E-01 | NA       | 21.84    | not significant |
| 4931 | NCR3       | -1.00 | 3.52E-01 | NA       | 13.65    | not significant |
| 4932 | AP1S3      | -1.00 | 4.15E-01 | NA       | 18.96    | not significant |
| 4933 | C15orf54   | -1.00 | 4.44E-01 | NA       | 19.24    | not significant |
| 4934 | SOC3       | -1.00 | 6.48E-01 | NA       | 57.16    | not significant |
| 4935 | KLF5       | -1.00 | 7.56E-01 | 8.90E-01 | 154.93   | not significant |
| 4936 | MRPS33     | -1.00 | 8.20E-01 | 9.25E-01 | 1303.84  | not significant |
| 4937 | TFE3       | -1.00 | 7.77E-01 | 9.02E-01 | 213.92   | not significant |
| 4938 | SAAL1      | -1.00 | 8.17E-01 | 9.23E-01 | 1699.70  | not significant |
| 4939 | GRK6       | -1.00 | 8.41E-01 | 9.32E-01 | 3448.39  | not significant |
| 4940 | MAP1LC3B   | -1.00 | 8.14E-01 | 9.22E-01 | 2018.27  | not significant |
| 4941 | FAM76A     | -1.00 | 8.32E-01 | 9.29E-01 | 640.59   | not significant |
| 4942 | LAX1       | -1.00 | 8.20E-01 | 9.25E-01 | 1142.83  | not significant |
| 4943 | GMCL1      | -1.00 | 8.14E-01 | 9.21E-01 | 1886.36  | not significant |
| 4944 | ARHGAP12   | -1.00 | 8.06E-01 | 9.17E-01 | 405.34   | not significant |
| 4945 | RANBP9     | -1.00 | 8.25E-01 | 9.27E-01 | 3055.93  | not significant |
| 4946 | NSUN4      | -1.00 | 8.22E-01 | 9.26E-01 | 1602.43  | not significant |
| 4947 | MAML1      | -1.00 | 8.13E-01 | 9.21E-01 | 3376.86  | not significant |
| 4948 | PLA2G4A    | -1.00 | 2.98E-01 | NA       | 11.25    | not significant |
| 4949 | SYNC       | -1.00 | 3.67E-01 | NA       | 75.26    | not significant |
| 4950 | NPB        | -1.00 | 2.80E-01 | NA       | 9.66     | not significant |
| 4951 | LHFPL1     | -1.00 | 5.79E-01 | NA       | 35.28    | not significant |
| 4952 | KMT2A      | -1.00 | 7.33E-01 | 8.78E-01 | 678.12   | not significant |
| 4953 | KATNAL2    | -1.00 | 6.82E-01 | NA       | 73.73    | not significant |
| 4954 | NDUVF3     | -1.00 | 7.89E-01 | 9.09E-01 | 336.96   | not significant |
| 4955 | TNRC6B     | -1.00 | 7.75E-01 | 9.01E-01 | 1921.88  | not significant |
| 4956 | FAM173B    | -1.00 | 8.14E-01 | 9.22E-01 | 456.63   | not significant |
| 4957 | SLC35E3    | -1.00 | 8.00E-01 | 9.14E-01 | 322.30   | not significant |
| 4958 | FAM86DP    | -1.00 | 7.74E-01 | 9.00E-01 | 258.72   | not significant |
| 4959 | NDUFB8     | -1.00 | 8.05E-01 | 9.16E-01 | 4672.42  | not significant |
| 4960 | RTFDC1     | -1.00 | 8.12E-01 | 9.21E-01 | 2935.69  | not significant |
| 4961 | HADHA      | -1.00 | 7.87E-01 | 9.08E-01 | 6468.43  | not significant |
| 4962 | FLYWCH1    | -1.00 | 8.22E-01 | 9.26E-01 | 1078.18  | not significant |
| 4963 | GTF2IRD1P1 | -1.00 | 3.05E-01 | NA       | 11.32    | not significant |
| 4964 | TENC1      | -1.00 | 3.88E-01 | NA       | 14.74    | not significant |
| 4965 | PRKXP1     | -1.00 | 6.18E-01 | 8.14E-01 | 249.63   | not significant |
| 4966 | GPR158     | -1.00 | 5.41E-01 | NA       | 28.96    | not significant |
| 4967 | GRAMD2     | -1.00 | 3.08E-01 | NA       | 10.34    | not significant |
| 4968 | CASS4      | -1.00 | 6.25E-01 | NA       | 49.24    | not significant |
| 4969 | RAB38      | -1.00 | 6.53E-01 | NA       | 56.45    | not significant |
| 4970 | ACOT2      | -1.00 | 7.84E-01 | 9.06E-01 | 213.76   | not significant |
| 4971 | NLGN4Y     | -1.00 | 7.94E-01 | 9.11E-01 | 298.86   | not significant |
| 4972 | RRP8       | -1.00 | 8.24E-01 | 9.27E-01 | 909.36   | not significant |
| 4973 | CDK11B     | -1.00 | 8.23E-01 | 9.27E-01 | 847.68   | not significant |
| 4974 | CACNB3     | -1.00 | 8.24E-01 | 9.27E-01 | 1128.82  | not significant |
| 4975 | UBE2A      | -1.00 | 8.07E-01 | 9.17E-01 | 4361.75  | not significant |
| 4976 | ELMOD3     | -1.00 | 8.15E-01 | 9.22E-01 | 528.43   | not significant |
| 4977 | RAB18      | -1.00 | 8.18E-01 | 9.24E-01 | 2023.97  | not significant |
| 4978 | TNKS1BP1   | -1.00 | 8.23E-01 | 9.26E-01 | 581.47   | not significant |
| 4979 | ELF2       | -1.00 | 8.24E-01 | 9.27E-01 | 1270.97  | not significant |
| 4980 | SIGLEC8    | -1.00 | 3.35E-01 | NA       | 11.28    | not significant |
| 4981 | SCARNA9    | -1.00 | 3.91E-01 | NA       | 13.89    | not significant |
| 4982 | CATSPER3   | -1.00 | 4.52E-01 | NA       | 18.28    | not significant |
| 4983 | CCDC74B    | -1.00 | 5.39E-01 | NA       | 28.84    | not significant |
| 4984 | PTAFR      | -1.00 | 3.94E-01 | NA       | 14.47    | not significant |
| 4985 | LPAR4      | -1.00 | 5.45E-01 | NA       | 30.71    | not significant |
| 4986 | LRRC23     | -1.00 | 5.87E-01 | NA       | 36.09    | not significant |
| 4987 | CDC42EP2   | -1.00 | 5.95E-01 | NA       | 38.47    | not significant |
| 4988 | ATG10      | -1.00 | 8.07E-01 | 9.17E-01 | 353.02   | not significant |
| 4989 | SERGEF     | -1.00 | 8.19E-01 | 9.24E-01 | 394.68   | not significant |
| 4990 | GLRX       | -1.00 | 8.26E-01 | 9.28E-01 | 1219.17  | not significant |
| 4991 | MTM1       | -1.00 | 7.87E-01 | 9.08E-01 | 225.31   | not significant |
| 4992 | ENTPD5     | -1.00 | 7.59E-01 | 8.92E-01 | 168.48   | not significant |
| 4993 | ISG15      | -1.00 | 8.26E-01 | 9.28E-01 | 1256.63  | not significant |
| 4994 | SUV39H1    | -1.00 | 7.85E-01 | 9.07E-01 | 231.56   | not significant |
| 4995 | FAM188A    | -1.00 | 8.19E-01 | 9.24E-01 | 531.96   | not significant |
| 4996 | TRIM11     | -1.00 | 8.26E-01 | 9.28E-01 | 1493.82  | not significant |
| 4997 | FGFRL1     | -1.00 | 8.16E-01 | 9.23E-01 | 525.13   | not significant |
| 4998 | TBC1D24    | -1.00 | 8.27E-01 | 9.28E-01 | 1005.34  | not significant |
| 4999 | INPP4B     | -1.00 | 8.18E-01 | 9.24E-01 | 582.10   | not significant |
| 5000 | RBM33      | -1.00 | 8.25E-01 | 9.27E-01 | 3902.30  | not significant |
| 5001 | MAPK6      | -1.00 | 8.13E-01 | 9.21E-01 | 3909.96  | not significant |
| 5002 | ITLN1      | -1.00 | 4.24E-01 | NA       | 16.13    | not significant |
| 5003 | VAV2       | -1.00 | 3.28E-01 | NA       | 10.91    | not significant |

|      |              |       |          |          |         |                 |
|------|--------------|-------|----------|----------|---------|-----------------|
| 5004 | BTN1A1       | -1.00 | 4.78E-01 | NA       | 20.52   | not significant |
| 5005 | LOC100507437 | -1.00 | 2.41E-01 | NA       | 7.80    | not significant |
| 5006 | RAP1GAP2     | -1.00 | 6.48E-01 | NA       | 52.00   | not significant |
| 5007 | HSPA1A       | -1.00 | 4.80E-01 | NA       | 20.65   | not significant |
| 5008 | RUSC1-AS1    | -1.00 | 4.64E-01 | NA       | 22.49   | not significant |
| 5009 | C1orf74      | -1.00 | 7.65E-01 | 8.95E-01 | 164.26  | not significant |
| 5010 | WNK4         | -1.00 | 7.22E-01 | NA       | 91.10   | not significant |
| 5011 | SNAPC5       | -1.00 | 7.89E-01 | 9.09E-01 | 231.74  | not significant |
| 5012 | TXNDC9       | -1.00 | 8.28E-01 | 9.28E-01 | 869.28  | not significant |
| 5013 | TDRKH        | -1.00 | 8.27E-01 | 9.28E-01 | 602.47  | not significant |
| 5014 | MED20        | -1.00 | 8.31E-01 | 9.29E-01 | 1353.25 | not significant |
| 5015 | RBM18        | -1.00 | 8.30E-01 | 9.29E-01 | 1142.80 | not significant |
| 5016 | YTHDC1       | -1.00 | 8.31E-01 | 9.29E-01 | 1012.53 | not significant |
| 5017 | ZNF607       | -1.00 | 8.20E-01 | 9.25E-01 | 549.15  | not significant |
| 5018 | BBS7         | -1.00 | 8.30E-01 | 9.29E-01 | 764.57  | not significant |
| 5019 | NUB1         | -1.00 | 8.12E-01 | 9.21E-01 | 4103.01 | not significant |
| 5020 | TRIP11       | -1.00 | 8.30E-01 | 9.29E-01 | 1241.68 | not significant |
| 5021 | NSG1         | -1.00 | 3.60E-01 | NA       | 14.22   | not significant |
| 5022 | LOC100507053 | -1.00 | 4.47E-01 | NA       | 17.09   | not significant |
| 5023 | KIAA1257     | -1.00 | 2.77E-01 | NA       | 9.09    | not significant |
| 5024 | NTNG2        | -1.00 | 5.02E-01 | NA       | 21.81   | not significant |
| 5025 | ACTRT3       | -1.00 | 3.05E-01 | NA       | 9.57    | not significant |
| 5026 | TINAGL1      | -1.00 | 5.00E-01 | NA       | 22.11   | not significant |
| 5027 | OR2AG2       | -1.00 | 3.95E-01 | NA       | 13.63   | not significant |
| 5028 | GNA11        | -1.00 | 5.50E-01 | NA       | 28.56   | not significant |
| 5029 | CXorf40A     | -1.00 | 6.53E-01 | NA       | 50.79   | not significant |
| 5030 | DNAH10       | -1.00 | 6.38E-01 | NA       | 47.01   | not significant |
| 5031 | C20orf203    | -1.00 | 6.42E-01 | NA       | 47.97   | not significant |
| 5032 | ARL3         | -1.00 | 8.26E-01 | 9.28E-01 | 401.61  | not significant |
| 5033 | GMPPA        | -1.00 | 8.31E-01 | 9.29E-01 | 877.89  | not significant |
| 5034 | ZNF639       | -1.00 | 8.29E-01 | 9.28E-01 | 2024.51 | not significant |
| 5035 | LRRC40       | -1.00 | 8.30E-01 | 9.29E-01 | 1657.29 | not significant |
| 5036 | TIAL1        | -1.00 | 8.02E-01 | 9.14E-01 | 5880.44 | not significant |
| 5037 | GPATCH11     | -1.00 | 8.34E-01 | 9.30E-01 | 1666.86 | not significant |
| 5038 | DIAPH3       | -1.00 | 8.29E-01 | 9.28E-01 | 1667.29 | not significant |
| 5039 | PRR34        | -1.00 | 3.61E-01 | NA       | 11.43   | not significant |
| 5040 | NDRG2        | -1.00 | 4.53E-01 | NA       | 17.24   | not significant |
| 5041 | RAPGEF4      | -1.00 | 4.59E-01 | NA       | 17.93   | not significant |
| 5042 | LPAR1        | -1.00 | 4.97E-01 | NA       | 24.77   | not significant |
| 5043 | TGFB3        | -1.00 | 5.71E-01 | NA       | 31.21   | not significant |
| 5044 | TLR6         | -1.00 | 4.45E-01 | NA       | 16.56   | not significant |
| 5045 | LOC283922    | -1.00 | 7.42E-01 | 8.83E-01 | 118.42  | not significant |
| 5046 | TSPAN17      | -1.00 | 8.35E-01 | 9.31E-01 | 1058.42 | not significant |
| 5047 | UCKL1        | -1.00 | 8.36E-01 | 9.31E-01 | 1093.98 | not significant |
| 5048 | SETDB2       | -1.00 | 8.30E-01 | 9.29E-01 | 751.48  | not significant |
| 5049 | LRRC37BP1    | -1.00 | 8.34E-01 | 9.30E-01 | 602.01  | not significant |
| 5050 | TDP1         | -1.00 | 8.31E-01 | 9.29E-01 | 2260.51 | not significant |
| 5051 | FBXW11       | -1.00 | 8.35E-01 | 9.31E-01 | 1498.43 | not significant |
| 5052 | ACO2         | -1.00 | 8.03E-01 | 9.15E-01 | 6303.56 | not significant |
| 5053 | DDX31        | -1.00 | 8.35E-01 | 9.31E-01 | 963.53  | not significant |
| 5054 | SCNM1        | -1.00 | 4.08E-01 | NA       | 13.49   | not significant |
| 5055 | CHRNA6       | -1.00 | 7.51E-01 | 8.88E-01 | 115.44  | not significant |
| 5056 | ITIH4        | -1.00 | 7.67E-01 | 8.96E-01 | 133.02  | not significant |
| 5057 | C11orf45     | -1.00 | 8.05E-01 | 9.16E-01 | 284.92  | not significant |
| 5058 | YES1         | -1.00 | 8.38E-01 | 9.31E-01 | 951.16  | not significant |
| 5059 | CNOT4        | -1.00 | 8.36E-01 | 9.31E-01 | 998.76  | not significant |
| 5060 | DCUN1D4      | -1.00 | 8.34E-01 | 9.31E-01 | 730.38  | not significant |
| 5061 | ATP6V1A      | -1.00 | 8.30E-01 | 9.29E-01 | 2254.78 | not significant |
| 5062 | ADAMTS17     | -1.00 | 4.48E-01 | NA       | 15.47   | not significant |
| 5063 | LOC100129697 | -1.00 | 5.67E-01 | NA       | 27.62   | not significant |
| 5064 | LRRIQ4       | -1.00 | 3.61E-01 | NA       | 11.22   | not significant |
| 5065 | HIST1H2AE    | -1.00 | 5.94E-01 | NA       | 34.11   | not significant |
| 5066 | HSPA6        | -1.00 | 4.04E-01 | NA       | 13.69   | not significant |
| 5067 | LINC01355    | -1.00 | 7.12E-01 | NA       | 76.35   | not significant |
| 5068 | OTUD7B       | -1.00 | 6.64E-01 | NA       | 47.26   | not significant |
| 5069 | HAVCR2       | -1.00 | 6.33E-01 | NA       | 40.10   | not significant |
| 5070 | CNIH3        | -1.00 | 6.17E-01 | NA       | 37.58   | not significant |
| 5071 | C4orf48      | -1.00 | 7.67E-01 | 8.96E-01 | 624.69  | not significant |
| 5072 | NEK8         | -1.00 | 7.22E-01 | NA       | 79.75   | not significant |
| 5073 | GTF2H5       | -1.00 | 8.28E-01 | 9.28E-01 | 469.91  | not significant |
| 5074 | TLE4         | -1.00 | 7.97E-01 | 9.12E-01 | 189.07  | not significant |
| 5075 | SLCO3A1      | -1.00 | 7.50E-01 | 8.86E-01 | 110.01  | not significant |
| 5076 | ZNF831       | -1.00 | 7.73E-01 | 9.00E-01 | 149.03  | not significant |
| 5077 | SAV1         | -1.00 | 8.34E-01 | 9.31E-01 | 556.61  | not significant |
| 5078 | GDPGP1       | -1.00 | 6.24E-01 | NA       | 40.70   | not significant |
| 5079 | TRRAP        | -1.00 | 7.65E-01 | 8.95E-01 | 8031.12 | not significant |
| 5080 | FOXO4        | -1.00 | 8.25E-01 | 9.27E-01 | 358.95  | not significant |
| 5081 | ZNF276       | -1.00 | 8.34E-01 | 9.30E-01 | 2362.77 | not significant |
| 5082 | ACVR1B       | -1.00 | 8.36E-01 | 9.31E-01 | 1916.77 | not significant |
| 5083 | ZCCHC14      | -1.00 | 8.35E-01 | 9.31E-01 | 637.76  | not significant |
| 5084 | USP13        | -1.00 | 8.41E-01 | 9.32E-01 | 1334.46 | not significant |
| 5085 | MAPT         | -1.00 | 4.58E-01 | NA       | 17.33   | not significant |
| 5086 | ADAM8        | -1.00 | 6.50E-01 | NA       | 50.69   | not significant |
| 5087 | TRAM2-AS1    | -1.00 | 6.82E-01 | NA       | 54.70   | not significant |
| 5088 | FTH1P3       | -1.00 | 6.29E-01 | NA       | 39.35   | not significant |
| 5089 | CHRNA10      | -1.00 | 5.88E-01 | NA       | 35.08   | not significant |
| 5090 | FBLN7        | -1.00 | 6.75E-01 | NA       | 50.17   | not significant |
| 5091 | C11orf1      | -1.00 | 7.52E-01 | 8.88E-01 | 105.81  | not significant |

|      |               |       |          |          |          |                 |
|------|---------------|-------|----------|----------|----------|-----------------|
| 5092 | HYLS1         | -1.00 | 8.00E-01 | 9.14E-01 | 209.41   | not significant |
| 5093 | GPR19         | -1.00 | 8.03E-01 | 9.15E-01 | 185.89   | not significant |
| 5094 | PPM1L         | -1.00 | 7.64E-01 | 8.95E-01 | 135.00   | not significant |
| 5095 | FAM219A       | -1.00 | 8.42E-01 | 9.33E-01 | 717.59   | not significant |
| 5096 | C1QTNF3       | -1.00 | 7.93E-01 | 9.11E-01 | 178.43   | not significant |
| 5097 | MAP2K3        | -1.00 | 8.40E-01 | 9.32E-01 | 1547.33  | not significant |
| 5098 | RNF157        | -1.00 | 8.39E-01 | 9.31E-01 | 2479.64  | not significant |
| 5099 | RAB11FIP4     | -1.00 | 5.38E-01 | NA       | 22.91    | not significant |
| 5100 | ELK3          | -1.00 | 5.44E-01 | NA       | 23.26    | not significant |
| 5101 | STX1A         | -1.00 | 3.83E-01 | NA       | 10.68    | not significant |
| 5102 | NUDT13        | -1.00 | 5.03E-01 | NA       | 17.72    | not significant |
| 5103 | BCL6B         | -1.00 | 4.80E-01 | NA       | 16.74    | not significant |
| 5104 | SLC6A19       | -1.00 | 5.73E-01 | NA       | 26.42    | not significant |
| 5105 | APITD1        | -1.00 | 7.79E-01 | 9.03E-01 | 132.13   | not significant |
| 5106 | TRIP6         | -1.00 | 6.47E-01 | NA       | 41.38    | not significant |
| 5107 | ZNF737        | -1.00 | 6.60E-01 | NA       | 47.74    | not significant |
| 5108 | PTS           | -1.00 | 8.42E-01 | 9.32E-01 | 662.66   | not significant |
| 5109 | SMARCAD1      | -1.00 | 8.31E-01 | 9.29E-01 | 4308.74  | not significant |
| 5110 | ZBTB21        | -1.00 | 8.70E-01 | 9.48E-01 | 1273.67  | not significant |
| 5111 | WIZ           | -1.00 | 8.94E-01 | 9.60E-01 | 2538.72  | not significant |
| 5112 | ECI1          | -1.00 | 5.42E-01 | NA       | 24.03    | not significant |
| 5113 | HIST1H2AC     | -1.00 | 4.62E-01 | NA       | 14.36    | not significant |
| 5114 | FAM135B       | -1.00 | 4.63E-01 | NA       | 14.76    | not significant |
| 5115 | HIST1H4I      | -1.00 | 5.17E-01 | NA       | 18.25    | not significant |
| 5116 | KLHDC1        | -1.00 | 5.86E-01 | NA       | 26.93    | not significant |
| 5117 | ACTR3C        | -1.00 | 5.61E-01 | NA       | 23.34    | not significant |
| 5118 | ALMS1-IT1     | -1.00 | 6.23E-01 | NA       | 34.14    | not significant |
| 5119 | SAMHD1        | -1.00 | 5.66E-01 | NA       | 25.12    | not significant |
| 5120 | ETV5          | -1.00 | 7.39E-01 | NA       | 88.38    | not significant |
| 5121 | SYNPO2        | -1.00 | 6.45E-01 | NA       | 37.55    | not significant |
| 5122 | RHPN1-AS1     | -1.00 | 7.77E-01 | 9.02E-01 | 125.00   | not significant |
| 5123 | RNPC3         | -1.00 | 8.35E-01 | 9.31E-01 | 356.10   | not significant |
| 5124 | DANCR         | -1.00 | 8.49E-01 | 9.36E-01 | 1961.37  | not significant |
| 5125 | DNAJC16       | -1.00 | 8.47E-01 | 9.36E-01 | 864.15   | not significant |
| 5126 | ZNF354C       | -1.00 | 8.38E-01 | 9.31E-01 | 431.80   | not significant |
| 5127 | RASA1         | -1.00 | 8.48E-01 | 9.36E-01 | 712.06   | not significant |
| 5128 | JAK2          | -1.00 | 8.48E-01 | 9.36E-01 | 911.18   | not significant |
| 5129 | CMPK1         | -1.00 | 8.28E-01 | 9.28E-01 | 5075.50  | not significant |
| 5130 | TMEM181       | -1.00 | 8.48E-01 | 9.36E-01 | 1775.31  | not significant |
| 5131 | ANAPC2        | -1.00 | 8.50E-01 | 9.37E-01 | 1095.71  | not significant |
| 5132 | NIM1K         | -1.00 | 3.51E-01 | NA       | 9.65     | not significant |
| 5133 | LOC100129534  | -1.00 | 3.96E-01 | NA       | 11.79    | not significant |
| 5134 | NLRP11        | -1.00 | 3.76E-01 | NA       | 10.12    | not significant |
| 5135 | MYH7B         | -1.00 | 4.10E-01 | NA       | 11.22    | not significant |
| 5136 | TPH1          | -1.00 | 3.81E-01 | NA       | 9.85     | not significant |
| 5137 | SAMD12        | -1.00 | 6.87E-01 | NA       | 53.29    | not significant |
| 5138 | CHN1          | -1.00 | 6.38E-01 | NA       | 41.51    | not significant |
| 5139 | NMNAT3        | -1.00 | 3.65E-01 | NA       | 10.14    | not significant |
| 5140 | GHRLOS        | -1.00 | 7.14E-01 | NA       | 59.70    | not significant |
| 5141 | SCOC-AS1      | -1.00 | 6.41E-01 | NA       | 37.74    | not significant |
| 5142 | WDR17         | -1.00 | 7.91E-01 | 9.10E-01 | 145.23   | not significant |
| 5143 | DNAJC17       | -1.00 | 8.33E-01 | 9.30E-01 | 349.40   | not significant |
| 5144 | DAXX          | -1.00 | 8.45E-01 | 9.35E-01 | 624.52   | not significant |
| 5145 | SPC25         | -1.00 | 8.51E-01 | 9.37E-01 | 755.92   | not significant |
| 5146 | C9orf69       | -1.00 | 8.49E-01 | 9.36E-01 | 1870.82  | not significant |
| 5147 | C12orf75      | -1.00 | 8.27E-01 | 9.28E-01 | 4773.48  | not significant |
| 5148 | CDKN1A        | -1.00 | 8.49E-01 | 9.37E-01 | 1679.85  | not significant |
| 5149 | H2AFV         | -1.00 | 8.22E-01 | 9.26E-01 | 8688.26  | not significant |
| 5150 | TAB3          | -1.00 | 8.50E-01 | 9.37E-01 | 1677.34  | not significant |
| 5151 | LATS2         | -1.00 | 5.73E-01 | NA       | 23.09    | not significant |
| 5152 | GATA3-AS1     | -1.00 | 4.92E-01 | NA       | 16.05    | not significant |
| 5153 | DSCAML1       | -1.00 | 5.37E-01 | NA       | 20.89    | not significant |
| 5154 | LOC100506124  | -1.00 | 6.10E-01 | NA       | 27.86    | not significant |
| 5155 | LOC644961     | -1.00 | 7.23E-01 | NA       | 61.73    | not significant |
| 5156 | AURKAPS1      | -1.00 | 5.49E-01 | NA       | 22.97    | not significant |
| 5157 | PDCL3P4       | -1.00 | 6.21E-01 | NA       | 31.60    | not significant |
| 5158 | BVES          | -1.00 | 7.02E-01 | NA       | 56.14    | not significant |
| 5159 | LINC01120     | -1.00 | 8.24E-01 | 9.27E-01 | 277.40   | not significant |
| 5160 | RAD54L2       | -1.00 | 8.01E-01 | 9.14E-01 | 986.14   | not significant |
| 5161 | DKFZP434I0714 | -1.00 | 8.20E-01 | 9.25E-01 | 211.18   | not significant |
| 5162 | LOC728613     | -1.00 | 7.69E-01 | 8.97E-01 | 100.73   | not significant |
| 5163 | PDLIM7        | -1.00 | 8.28E-01 | 9.28E-01 | 307.16   | not significant |
| 5164 | MAP3K10       | -1.00 | 8.45E-01 | 9.35E-01 | 537.02   | not significant |
| 5165 | TANC2         | -1.00 | 8.16E-01 | 9.22E-01 | 297.01   | not significant |
| 5166 | METTL6        | -1.00 | 8.54E-01 | 9.40E-01 | 760.37   | not significant |
| 5167 | SRP9          | -1.00 | 8.40E-01 | 9.32E-01 | 6972.48  | not significant |
| 5168 | LRPAP1        | -1.00 | 8.44E-01 | 9.35E-01 | 2597.92  | not significant |
| 5169 | FAM102A       | -1.00 | 8.53E-01 | 9.39E-01 | 1111.57  | not significant |
| 5170 | RANBP3        | -1.00 | 8.45E-01 | 9.35E-01 | 2780.23  | not significant |
| 5171 | PEAK1         | -1.00 | 8.53E-01 | 9.40E-01 | 1049.45  | not significant |
| 5172 | ITSN2         | -1.00 | 8.53E-01 | 9.39E-01 | 2098.46  | not significant |
| 5173 | TMPO          | -1.00 | 8.20E-01 | 9.25E-01 | 31912.30 | not significant |
| 5174 | WDR59         | -1.00 | 8.49E-01 | 9.36E-01 | 2104.77  | not significant |
| 5175 | GAL3ST4       | -1.00 | 8.40E-01 | 9.32E-01 | 320.31   | not significant |
| 5176 | ZACN          | -1.00 | 3.41E-01 | NA       | 34.99    | not significant |
| 5177 | CACTIN-AS1    | -1.00 | 4.93E-01 | NA       | 15.67    | not significant |
| 5178 | IL17D         | -1.00 | 5.09E-01 | NA       | 16.92    | not significant |
| 5179 | OSCP1         | -1.00 | 6.40E-01 | NA       | 33.89    | not significant |

|      |              |       |          |          |          |                 |
|------|--------------|-------|----------|----------|----------|-----------------|
| 5180 | MT1HL1       | -1.00 | 5.31E-01 | NA       | 17.36    | not significant |
| 5181 | SCARNA17     | -1.00 | 6.47E-01 | NA       | 33.61    | not significant |
| 5182 | ZNRD1-AS1    | -1.00 | 4.98E-01 | NA       | 16.19    | not significant |
| 5183 | RBKS         | -1.00 | 7.60E-01 | NA       | 88.12    | not significant |
| 5184 | CCND2        | -1.00 | 7.09E-01 | NA       | 55.37    | not significant |
| 5185 | DNM3         | -1.00 | 6.37E-01 | NA       | 31.62    | not significant |
| 5186 | HLF          | -1.00 | 6.74E-01 | NA       | 39.26    | not significant |
| 5187 | GLB1L3       | -1.00 | 6.06E-01 | NA       | 26.37    | not significant |
| 5188 | PMFBP1       | -1.00 | 6.94E-01 | NA       | 51.62    | not significant |
| 5189 | CBWD5        | -1.00 | 6.78E-01 | NA       | 40.52    | not significant |
| 5190 | GEMIN7       | -1.00 | 8.48E-01 | 9.36E-01 | 506.51   | not significant |
| 5191 | LSM3         | -1.00 | 8.58E-01 | 9.42E-01 | 2557.91  | not significant |
| 5192 | ZNF439       | -1.00 | 8.37E-01 | 9.31E-01 | 327.77   | not significant |
| 5193 | MANBAL       | -1.00 | 8.58E-01 | 9.43E-01 | 547.86   | not significant |
| 5194 | ERMARD       | -1.00 | 8.35E-01 | 9.31E-01 | 378.22   | not significant |
| 5195 | GPX7         | -1.00 | 8.56E-01 | 9.41E-01 | 1010.37  | not significant |
| 5196 | MLXIP        | -1.00 | 8.56E-01 | 9.42E-01 | 4294.65  | not significant |
| 5197 | OVGP1        | -1.00 | 6.66E-01 | NA       | 41.71    | not significant |
| 5198 | TRIM67       | -1.00 | 4.67E-01 | NA       | 13.01    | not significant |
| 5199 | DMBT1        | -1.00 | 4.83E-01 | NA       | 14.44    | not significant |
| 5200 | GPR97        | -1.00 | 5.74E-01 | NA       | 21.79    | not significant |
| 5201 | FLG-AS1      | -1.00 | 4.46E-01 | NA       | 12.42    | not significant |
| 5202 | EDA2R        | -1.00 | 5.90E-01 | NA       | 23.88    | not significant |
| 5203 | CIRBP-AS1    | -1.00 | 5.53E-01 | NA       | 20.80    | not significant |
| 5204 | IL4          | -1.00 | 7.31E-01 | NA       | 64.32    | not significant |
| 5205 | LOC100499484 | -1.00 | 5.50E-01 | NA       | 18.94    | not significant |
| 5206 | PPIL3        | -1.00 | 8.60E-01 | 9.43E-01 | 1125.89  | not significant |
| 5207 | MAP4K3       | -1.00 | 8.58E-01 | 9.43E-01 | 751.87   | not significant |
| 5208 | ATG4D        | -1.00 | 8.60E-01 | 9.43E-01 | 1399.27  | not significant |
| 5209 | OBFC1        | -1.00 | 8.60E-01 | 9.43E-01 | 1222.32  | not significant |
| 5210 | JOSD1        | -1.00 | 8.53E-01 | 9.39E-01 | 2279.40  | not significant |
| 5211 | TENM1        | -1.00 | 8.57E-01 | 9.42E-01 | 607.94   | not significant |
| 5212 | PLCH2        | -1.00 | 5.25E-01 | NA       | 16.44    | not significant |
| 5213 | DIP2C        | -1.00 | 4.52E-01 | NA       | 12.74    | not significant |
| 5214 | KCNQ1OT1     | -1.00 | 5.30E-01 | NA       | 18.23    | not significant |
| 5215 | LOC730202    | -1.00 | 5.62E-01 | NA       | 19.62    | not significant |
| 5216 | PAIP2B       | -1.00 | 6.03E-01 | NA       | 24.89    | not significant |
| 5217 | GUSBP4       | -1.00 | 8.19E-01 | 9.24E-01 | 203.65   | not significant |
| 5218 | CEP83-AS1    | -1.00 | 6.25E-01 | NA       | 28.10    | not significant |
| 5219 | TTC28-AS1    | -1.00 | 8.53E-01 | 9.39E-01 | 639.14   | not significant |
| 5220 | COMMD7       | -1.00 | 8.61E-01 | 9.43E-01 | 2468.87  | not significant |
| 5221 | TOMM20       | -1.00 | 8.35E-01 | 9.31E-01 | 6724.56  | not significant |
| 5222 | DDX23        | -1.00 | 8.24E-01 | 9.27E-01 | 10580.70 | not significant |
| 5223 | PHB2         | -1.00 | 8.97E-01 | 9.61E-01 | 5452.08  | not significant |
| 5224 | GRIK5        | -1.00 | 4.66E-01 | NA       | 11.79    | not significant |
| 5225 | RPS4Y2       | -1.00 | 4.99E-01 | NA       | 13.96    | not significant |
| 5226 | ANXA1        | -1.00 | 8.11E-01 | 9.20E-01 | 162.05   | not significant |
| 5227 | DRAM1        | -1.00 | 7.22E-01 | NA       | 55.22    | not significant |
| 5228 | SCN2A        | -1.00 | 7.00E-01 | NA       | 47.34    | not significant |
| 5229 | SIRPG        | -1.00 | 8.00E-01 | 9.14E-01 | 127.52   | not significant |
| 5230 | PHYH         | -1.00 | 8.28E-01 | 9.28E-01 | 207.04   | not significant |
| 5231 | SLC43A2      | -1.00 | 8.32E-01 | 9.29E-01 | 219.48   | not significant |
| 5232 | CENPBD1      | -1.00 | 8.42E-01 | 9.33E-01 | 269.60   | not significant |
| 5233 | PGAP2        | -1.00 | 8.65E-01 | 9.45E-01 | 910.20   | not significant |
| 5234 | CHRNA5       | -1.00 | 8.62E-01 | 9.44E-01 | 659.70   | not significant |
| 5235 | ASB14        | -1.00 | 5.05E-01 | NA       | 15.49    | not significant |
| 5236 | LOC101060498 | -1.00 | 4.08E-01 | NA       | 10.05    | not significant |
| 5237 | RAET1E-AS1   | -1.00 | 4.82E-01 | NA       | 12.78    | not significant |
| 5238 | FRMPD2       | -1.00 | 5.56E-01 | NA       | 19.25    | not significant |
| 5239 | CLDND2       | -1.00 | 5.66E-01 | NA       | 19.20    | not significant |
| 5240 | POMK         | -1.00 | 8.29E-01 | 9.29E-01 | 196.88   | not significant |
| 5241 | IRS1         | -1.00 | 8.74E-01 | 9.50E-01 | 261.85   | not significant |
| 5242 | UBE2T        | -1.00 | 8.65E-01 | 9.45E-01 | 2325.18  | not significant |
| 5243 | HECTD1       | -1.00 | 8.74E-01 | 9.50E-01 | 3249.61  | not significant |
| 5244 | PFN1         | -1.00 | 8.59E-01 | 9.43E-01 | 50077.37 | not significant |
| 5245 | RHOF         | -1.00 | 8.61E-01 | 9.43E-01 | 2490.68  | not significant |
| 5246 | RHBDL1       | -1.00 | 8.26E-01 | 9.28E-01 | 177.10   | not significant |
| 5247 | POGK         | -1.00 | 8.56E-01 | 9.42E-01 | 3840.41  | not significant |
| 5248 | RAD17        | -1.00 | 8.66E-01 | 9.45E-01 | 902.96   | not significant |
| 5249 | MTA1         | -1.00 | 8.63E-01 | 9.44E-01 | 2153.30  | not significant |
| 5250 | ATN1         | -1.00 | 8.60E-01 | 9.43E-01 | 409.48   | not significant |
| 5251 | ENTPD1       | -1.00 | 3.35E-01 | NA       | 30.10    | not significant |
| 5252 | UXT-AS1      | -1.00 | 5.07E-01 | NA       | 13.38    | not significant |
| 5253 | PRKCZ        | -1.00 | 4.83E-01 | NA       | 14.20    | not significant |
| 5254 | C22orf24     | -1.00 | 6.53E-01 | NA       | 29.22    | not significant |
| 5255 | DHRS2        | -1.00 | 6.36E-01 | NA       | 26.56    | not significant |
| 5256 | XYL1         | -1.00 | 5.45E-01 | NA       | 15.60    | not significant |
| 5257 | TCAP         | -1.00 | 6.70E-01 | NA       | 32.43    | not significant |
| 5258 | JAKMIP3      | -1.00 | 7.61E-01 | NA       | 68.16    | not significant |
| 5259 | XRCC6BP1     | -1.00 | 8.38E-01 | 9.31E-01 | 219.12   | not significant |
| 5260 | CCNT2-AS1    | -1.00 | 7.90E-01 | NA       | 94.85    | not significant |
| 5261 | ZNF749       | -1.00 | 8.63E-01 | 9.44E-01 | 521.94   | not significant |
| 5262 | PHTF2        | -1.00 | 8.71E-01 | 9.49E-01 | 1592.48  | not significant |
| 5263 | RALGPS1      | -1.00 | 8.69E-01 | 9.47E-01 | 797.05   | not significant |
| 5264 | PURB         | -1.00 | 8.69E-01 | 9.48E-01 | 5010.03  | not significant |
| 5265 | SNX4         | -1.00 | 8.80E-01 | 9.53E-01 | 1616.40  | not significant |
| 5266 | PAGE5        | -1.00 | 6.80E-01 | NA       | 31.96    | not significant |
| 5267 | TMEM72       | -1.00 | 7.51E-01 | NA       | 36.18    | not significant |

|      |              |       |          |          |          |                 |
|------|--------------|-------|----------|----------|----------|-----------------|
| 5268 | KCNIP2       | -1.00 | 6.40E-01 | NA       | 27.02    | not significant |
| 5269 | LINC00861    | -1.00 | 8.25E-01 | 9.27E-01 | 154.47   | not significant |
| 5270 | PGBD4        | -1.00 | 8.24E-01 | 9.27E-01 | 148.02   | not significant |
| 5271 | ICAM1        | -1.00 | 8.29E-01 | 9.28E-01 | 165.51   | not significant |
| 5272 | TCEA2        | -1.00 | 8.60E-01 | 9.43E-01 | 331.34   | not significant |
| 5273 | CD1D         | -1.00 | 8.66E-01 | 9.46E-01 | 368.65   | not significant |
| 5274 | ASXL2        | -1.00 | 8.41E-01 | 9.32E-01 | 2220.19  | not significant |
| 5275 | FBXO44       | -1.00 | 8.75E-01 | 9.52E-01 | 1193.94  | not significant |
| 5276 | FIZ1         | -1.00 | 8.70E-01 | 9.48E-01 | 827.05   | not significant |
| 5277 | SGTB         | -1.00 | 8.72E-01 | 9.49E-01 | 614.27   | not significant |
| 5278 | PAXIP1       | -1.00 | 8.68E-01 | 9.47E-01 | 2819.65  | not significant |
| 5279 | RBM8A        | -1.00 | 9.82E-01 | 9.96E-01 | 2085.90  | not significant |
| 5280 | KIAA1033     | -1.00 | 9.00E-01 | 9.62E-01 | 2890.68  | not significant |
| 5281 | MUC1         | -1.00 | 5.42E-01 | NA       | 13.80    | not significant |
| 5282 | LOC100506606 | -1.00 | 6.63E-01 | NA       | 26.71    | not significant |
| 5283 | ZNF197-AS1   | -1.00 | 4.92E-01 | NA       | 11.28    | not significant |
| 5284 | KIF26B       | -1.00 | 5.91E-01 | NA       | 20.03    | not significant |
| 5285 | CRTAM        | -1.00 | 5.21E-01 | NA       | 13.36    | not significant |
| 5286 | TLCD1        | -1.00 | 4.68E-01 | NA       | 10.19    | not significant |
| 5287 | HORMAD2      | -1.00 | 6.08E-01 | NA       | 20.04    | not significant |
| 5288 | UBAP1L       | -1.00 | 6.27E-01 | NA       | 22.14    | not significant |
| 5289 | TMEM8B       | -1.00 | 8.36E-01 | 9.31E-01 | 183.47   | not significant |
| 5290 | GLB1L2       | -1.00 | 8.74E-01 | 9.51E-01 | 168.94   | not significant |
| 5291 | TTC13        | -1.00 | 8.70E-01 | 9.48E-01 | 636.41   | not significant |
| 5292 | TMEM79       | -1.00 | 8.53E-01 | 9.40E-01 | 260.29   | not significant |
| 5293 | MRPL9        | -1.00 | 8.72E-01 | 9.50E-01 | 2906.07  | not significant |
| 5294 | WDR53        | -1.00 | 8.76E-01 | 9.52E-01 | 482.55   | not significant |
| 5295 | RBM19        | -1.00 | 8.65E-01 | 9.45E-01 | 3133.29  | not significant |
| 5296 | MKL2         | -1.00 | 8.76E-01 | 9.52E-01 | 1626.46  | not significant |
| 5297 | GUSBP2       | -1.00 | 6.18E-01 | NA       | 21.38    | not significant |
| 5298 | CCDC116      | -1.00 | 6.64E-01 | NA       | 26.57    | not significant |
| 5299 | C2orf27A     | -1.00 | 7.60E-01 | NA       | 74.82    | not significant |
| 5300 | ARHGAP39     | -1.00 | 5.81E-01 | NA       | 17.97    | not significant |
| 5301 | ACTA2        | -1.00 | 6.19E-01 | NA       | 19.83    | not significant |
| 5302 | MGC16142     | -1.00 | 6.86E-01 | NA       | 33.14    | not significant |
| 5303 | RIN1         | -1.00 | 6.93E-01 | NA       | 32.09    | not significant |
| 5304 | DNAL4        | -1.00 | 7.92E-01 | 9.11E-01 | 330.43   | not significant |
| 5305 | LYG1         | -1.00 | 7.51E-01 | NA       | 55.10    | not significant |
| 5306 | ITFG3        | -1.00 | 8.78E-01 | 9.52E-01 | 775.92   | not significant |
| 5307 | ZNF331       | -1.00 | 8.68E-01 | 9.47E-01 | 1034.99  | not significant |
| 5308 | TMEM143      | -1.00 | 8.59E-01 | 9.43E-01 | 257.11   | not significant |
| 5309 | FLII         | -1.00 | 8.56E-01 | 9.42E-01 | 5846.44  | not significant |
| 5310 | FRMD4A       | -1.00 | 8.56E-01 | 9.42E-01 | 1034.30  | not significant |
| 5311 | POLQ         | -1.00 | 8.79E-01 | 9.52E-01 | 2247.14  | not significant |
| 5312 | LIMA1        | -1.00 | 8.78E-01 | 9.52E-01 | 1284.20  | not significant |
| 5313 | MEGF9        | -1.00 | 8.79E-01 | 9.52E-01 | 1722.14  | not significant |
| 5314 | GALNT10      | -1.00 | 8.80E-01 | 9.53E-01 | 1408.83  | not significant |
| 5315 | LRRRC63      | -1.00 | 6.61E-01 | NA       | 25.47    | not significant |
| 5316 | LOC100507634 | -1.00 | 4.59E-01 | NA       | 9.86     | not significant |
| 5317 | MYL4         | -1.00 | 5.21E-01 | NA       | 12.86    | not significant |
| 5318 | PLEKHH1      | -1.00 | 5.60E-01 | NA       | 13.93    | not significant |
| 5319 | PROCA1       | -1.00 | 7.98E-01 | NA       | 84.64    | not significant |
| 5320 | NHLRC2       | -1.00 | 8.41E-01 | 9.32E-01 | 830.75   | not significant |
| 5321 | MED7         | -1.00 | 8.68E-01 | 9.47E-01 | 322.47   | not significant |
| 5322 | ZNF709       | -1.00 | 8.53E-01 | 9.40E-01 | 221.16   | not significant |
| 5323 | ZNF557       | -1.00 | 8.83E-01 | 9.55E-01 | 588.07   | not significant |
| 5324 | CLHC1        | -1.00 | 8.58E-01 | 9.42E-01 | 240.51   | not significant |
| 5325 | ACAD10       | -1.00 | 8.77E-01 | 9.52E-01 | 700.26   | not significant |
| 5326 | PRPS1        | -1.00 | 8.77E-01 | 9.52E-01 | 3043.64  | not significant |
| 5327 | CCNH         | -1.00 | 8.79E-01 | 9.52E-01 | 864.55   | not significant |
| 5328 | TCEA3        | -1.00 | 6.72E-01 | NA       | 25.31    | not significant |
| 5329 | TNFSF12      | -1.00 | 6.14E-01 | NA       | 18.07    | not significant |
| 5330 | RNF138P1     | -1.00 | 5.52E-01 | NA       | 13.30    | not significant |
| 5331 | HIST1H2BF    | -1.00 | 6.62E-01 | NA       | 26.11    | not significant |
| 5332 | F3           | -1.00 | 6.00E-01 | NA       | 16.66    | not significant |
| 5333 | LOC100129931 | -1.00 | 5.96E-01 | NA       | 23.74    | not significant |
| 5334 | PTPN12       | -1.00 | 6.95E-01 | NA       | 28.55    | not significant |
| 5335 | POLN         | -1.00 | 6.39E-01 | NA       | 22.19    | not significant |
| 5336 | MUSTN1       | -1.00 | 5.80E-01 | NA       | 15.86    | not significant |
| 5337 | SAMD3        | -1.00 | 5.54E-01 | NA       | 13.58    | not significant |
| 5338 | ZNF232       | -1.00 | 8.83E-01 | 9.55E-01 | 758.11   | not significant |
| 5339 | MFSD2A       | -1.00 | 8.60E-01 | 9.43E-01 | 282.30   | not significant |
| 5340 | RPS11        | -1.00 | 8.91E-01 | 9.59E-01 | 22773.36 | not significant |
| 5341 | FAM122A      | -1.00 | 8.74E-01 | 9.51E-01 | 679.03   | not significant |
| 5342 | BTBD2        | -1.00 | 8.76E-01 | 9.52E-01 | 3593.14  | not significant |
| 5343 | GNAS         | -1.00 | 8.59E-01 | 9.43E-01 | 20214.91 | not significant |
| 5344 | SEC61A1      | -1.00 | 8.64E-01 | 9.45E-01 | 13710.07 | not significant |
| 5345 | SRP72        | -1.00 | 8.57E-01 | 9.42E-01 | 7465.19  | not significant |
| 5346 | PDZD8        | -1.00 | 8.85E-01 | 9.56E-01 | 1256.11  | not significant |
| 5347 | SLC4A5       | -1.00 | 6.36E-01 | NA       | 19.83    | not significant |
| 5348 | KIAA0513     | -1.00 | 7.11E-01 | NA       | 33.30    | not significant |
| 5349 | KIAA0825     | -1.00 | 6.84E-01 | NA       | 27.80    | not significant |
| 5350 | TRIM2        | -1.00 | 6.94E-01 | NA       | 28.15    | not significant |
| 5351 | BACE1-AS     | -1.00 | 7.11E-01 | NA       | 33.33    | not significant |
| 5352 | IL10         | -1.00 | 6.34E-01 | NA       | 20.94    | not significant |
| 5353 | LOC100287098 | -1.00 | 5.77E-01 | NA       | 13.69    | not significant |
| 5354 | VCL          | -1.00 | 7.04E-01 | NA       | 36.32    | not significant |
| 5355 | LOC101928068 | -1.00 | 6.08E-01 | NA       | 17.18    | not significant |



|      |               |       |          |          |         |                 |
|------|---------------|-------|----------|----------|---------|-----------------|
| 5356 | LOC100507250  | -1.00 | 6.71E-01 | NA       | 24.66   | not significant |
| 5357 | SKIDA1        | -1.00 | 6.46E-01 | NA       | 21.62   | not significant |
| 5358 | PRDM11        | -1.00 | 7.92E-01 | NA       | 70.65   | not significant |
| 5359 | LOC389906     | -1.00 | 8.59E-01 | 9.43E-01 | 220.77  | not significant |
| 5360 | KDMA4-AS1     | -1.00 | 7.78E-01 | NA       | 67.50   | not significant |
| 5361 | BIRC2         | -1.00 | 8.87E-01 | 9.57E-01 | 1372.56 | not significant |
| 5362 | ZNF18         | -1.00 | 8.76E-01 | 9.52E-01 | 359.14  | not significant |
| 5363 | VHL           | -1.00 | 8.67E-01 | 9.47E-01 | 5261.69 | not significant |
| 5364 | PDE4D         | -1.00 | 8.87E-01 | 9.57E-01 | 1243.71 | not significant |
| 5365 | MGAT5         | -1.00 | 9.23E-01 | 9.71E-01 | 3106.02 | not significant |
| 5366 | EGFL7         | -1.00 | 5.16E-01 | NA       | 10.17   | not significant |
| 5367 | CXCR5         | -1.00 | 5.97E-01 | NA       | 15.11   | not significant |
| 5368 | IRF5          | -1.00 | 7.22E-01 | NA       | 34.25   | not significant |
| 5369 | PTPRVP        | -1.00 | 6.67E-01 | NA       | 17.91   | not significant |
| 5370 | LNP1          | -1.00 | 7.97E-01 | NA       | 66.29   | not significant |
| 5371 | RIMKLA        | -1.00 | 6.98E-01 | NA       | 30.26   | not significant |
| 5372 | BUD31         | -1.00 | 9.13E-01 | 9.67E-01 | 3210.61 | not significant |
| 5373 | MAP3K8        | -1.00 | 8.18E-01 | NA       | 97.46   | not significant |
| 5374 | ADI1          | -1.00 | 8.87E-01 | 9.57E-01 | 2311.18 | not significant |
| 5375 | HIBADH        | -1.00 | 8.90E-01 | 9.58E-01 | 717.85  | not significant |
| 5376 | PTPDC1        | -1.00 | 8.78E-01 | 9.52E-01 | 355.85  | not significant |
| 5377 | STAM2         | -1.00 | 8.85E-01 | 9.56E-01 | 836.20  | not significant |
| 5378 | DOCK5         | -1.00 | 8.84E-01 | 9.56E-01 | 847.35  | not significant |
| 5379 | RASSF2        | -1.00 | 8.86E-01 | 9.56E-01 | 2686.44 | not significant |
| 5380 | MAPRE2        | -1.00 | 8.97E-01 | 9.61E-01 | 4492.76 | not significant |
| 5381 | GALNT13       | -1.00 | 5.41E-01 | NA       | 10.92   | not significant |
| 5382 | SHB           | -1.00 | 6.14E-01 | NA       | 17.10   | not significant |
| 5383 | LAMA2         | -1.00 | 5.84E-01 | NA       | 14.40   | not significant |
| 5384 | LINC00996     | -1.00 | 6.26E-01 | NA       | 18.44   | not significant |
| 5385 | PLEKHA1       | -1.00 | 7.83E-01 | NA       | 57.85   | not significant |
| 5386 | CDIPT-AS1     | -1.00 | 5.82E-01 | NA       | 13.05   | not significant |
| 5387 | BHLHE23       | -1.00 | 6.34E-01 | NA       | 17.58   | not significant |
| 5388 | EPCAM         | -1.00 | 7.15E-01 | NA       | 30.11   | not significant |
| 5389 | IFITM10       | -1.00 | 7.22E-01 | NA       | 32.50   | not significant |
| 5390 | SCAMP5        | -1.00 | 8.87E-01 | 9.57E-01 | 410.73  | not significant |
| 5391 | ZNF549        | -1.00 | 8.79E-01 | 9.52E-01 | 584.83  | not significant |
| 5392 | GID8          | -1.00 | 8.86E-01 | 9.56E-01 | 3333.70 | not significant |
| 5393 | CEP41         | -1.00 | 8.85E-01 | 9.56E-01 | 405.42  | not significant |
| 5394 | MBTPS2        | -1.00 | 8.88E-01 | 9.57E-01 | 746.42  | not significant |
| 5395 | RAB35         | -1.00 | 8.85E-01 | 9.56E-01 | 3528.87 | not significant |
| 5396 | HIST1H3J      | -1.00 | 5.83E-01 | NA       | 12.47   | not significant |
| 5397 | C7orf55       | -1.00 | 8.02E-01 | NA       | 68.68   | not significant |
| 5398 | RAB39B        | -1.00 | 7.21E-01 | NA       | 30.02   | not significant |
| 5399 | MORF4L2-AS1   | -1.00 | 7.47E-01 | NA       | 38.29   | not significant |
| 5400 | HIP1          | -1.00 | 5.71E-01 | NA       | 12.82   | not significant |
| 5401 | FXYP2         | -1.00 | 7.85E-01 | NA       | 74.40   | not significant |
| 5402 | HSD3B7        | -1.00 | 7.65E-01 | NA       | 49.87   | not significant |
| 5403 | TOP1P1        | -1.00 | 7.77E-01 | NA       | 48.98   | not significant |
| 5404 | CMTM4         | -1.00 | 7.80E-01 | NA       | 61.33   | not significant |
| 5405 | TSPY26P       | -1.00 | 8.24E-01 | NA       | 87.03   | not significant |
| 5406 | RAB3A         | -1.00 | 7.84E-01 | NA       | 56.61   | not significant |
| 5407 | METTL1        | -1.00 | 8.95E-01 | 9.61E-01 | 978.98  | not significant |
| 5408 | SMUG1         | -1.00 | 8.90E-01 | 9.59E-01 | 564.41  | not significant |
| 5409 | C9orf142      | -1.00 | 8.95E-01 | 9.61E-01 | 1221.47 | not significant |
| 5410 | DCTD          | -1.00 | 8.88E-01 | 9.57E-01 | 3257.57 | not significant |
| 5411 | NAGA          | -1.00 | 8.93E-01 | 9.60E-01 | 721.23  | not significant |
| 5412 | RER1          | -1.00 | 9.04E-01 | 9.63E-01 | 4122.76 | not significant |
| 5413 | ZNF24         | -1.00 | 8.86E-01 | 9.56E-01 | 4923.80 | not significant |
| 5414 | CTSW          | -1.00 | 6.64E-01 | NA       | 20.25   | not significant |
| 5415 | C10orf91      | -1.00 | 6.73E-01 | NA       | 19.94   | not significant |
| 5416 | MID1IP1-AS1   | -1.00 | 5.77E-01 | NA       | 11.26   | not significant |
| 5417 | C1QTNF3-AMACR | -1.00 | 5.21E-01 | NA       | 9.02    | not significant |
| 5418 | CEL           | -1.00 | 8.05E-01 | NA       | 68.49   | not significant |
| 5419 | DNM1P46       | -1.00 | 5.81E-01 | NA       | 12.51   | not significant |
| 5420 | CDKL2         | -1.00 | 6.17E-01 | NA       | 14.85   | not significant |
| 5421 | ARHGAP44      | -1.00 | 7.17E-01 | NA       | 29.09   | not significant |
| 5422 | FLVCR2        | -1.00 | 6.54E-01 | NA       | 16.80   | not significant |
| 5423 | S100Z         | -1.00 | 8.39E-01 | 9.31E-01 | 105.28  | not significant |
| 5424 | TCF20         | -1.00 | 7.97E-01 | 9.12E-01 | 135.48  | not significant |
| 5425 | C1orf123      | -1.00 | 8.99E-01 | 9.62E-01 | 795.62  | not significant |
| 5426 | ZNF497        | -1.00 | 8.48E-01 | 9.36E-01 | 120.18  | not significant |
| 5427 | TRIM46        | -1.00 | 8.71E-01 | 9.49E-01 | 204.87  | not significant |
| 5428 | DUS2          | -1.00 | 8.91E-01 | 9.59E-01 | 492.27  | not significant |
| 5429 | TUJM          | -1.00 | 8.47E-01 | 9.36E-01 | 9983.65 | not significant |
| 5430 | CTDSPL        | -1.00 | 8.97E-01 | 9.61E-01 | 1095.55 | not significant |
| 5431 | ZNF250        | -1.00 | 7.91E-01 | 9.10E-01 | 303.90  | not significant |
| 5432 | TAF1A-AS1     | -1.00 | 5.63E-01 | NA       | 10.97   | not significant |
| 5433 | GBP1P1        | -1.00 | 7.60E-01 | NA       | 39.60   | not significant |
| 5434 | HIST1H4L      | -1.00 | 5.55E-01 | NA       | 11.21   | not significant |
| 5435 | KIAA1211L     | -1.00 | 5.59E-01 | NA       | 10.07   | not significant |
| 5436 | SV2B          | -1.00 | 6.64E-01 | NA       | 18.94   | not significant |
| 5437 | CAB39L        | -1.00 | 8.45E-01 | 9.35E-01 | 100.90  | not significant |
| 5438 | AVEN          | -1.00 | 8.96E-01 | 9.61E-01 | 593.11  | not significant |
| 5439 | CD151         | -1.00 | 8.90E-01 | 9.58E-01 | 289.88  | not significant |
| 5440 | GPR160        | -1.00 | 8.81E-01 | 9.54E-01 | 228.73  | not significant |
| 5441 | GPR137B       | -1.00 | 8.79E-01 | 9.53E-01 | 245.67  | not significant |
| 5442 | COX7A2        | -1.00 | 8.98E-01 | 9.62E-01 | 4261.97 | not significant |
| 5443 | CRELD2        | -1.00 | 9.02E-01 | 9.63E-01 | 1185.17 | not significant |

|      |              |       |          |          |          |                 |
|------|--------------|-------|----------|----------|----------|-----------------|
| 5444 | LOC652276    | -1.00 | 8.43E-01 | 9.33E-01 | 124.46   | not significant |
| 5445 | C1orf35      | -1.00 | 9.02E-01 | 9.63E-01 | 1013.32  | not significant |
| 5446 | ZNF702P      | -1.00 | 8.77E-01 | 9.52E-01 | 213.08   | not significant |
| 5447 | NUDCD2       | -1.00 | 9.02E-01 | 9.63E-01 | 1142.40  | not significant |
| 5448 | ARMCX5       | -1.00 | 9.00E-01 | 9.62E-01 | 817.79   | not significant |
| 5449 | FHL1         | -1.00 | 9.01E-01 | 9.63E-01 | 1525.18  | not significant |
| 5450 | EIF4EBP2     | -1.00 | 8.65E-01 | 9.45E-01 | 10784.53 | not significant |
| 5451 | CASK         | -1.00 | 8.96E-01 | 9.61E-01 | 780.04   | not significant |
| 5452 | ZBTB2        | -1.00 | 9.00E-01 | 9.63E-01 | 1793.67  | not significant |
| 5453 | JMJD1C       | -1.00 | 8.99E-01 | 9.62E-01 | 3162.52  | not significant |
| 5454 | SLC35F6      | -1.00 | 9.02E-01 | 9.63E-01 | 1329.27  | not significant |
| 5455 | ADAM22       | -1.00 | 9.01E-01 | 9.63E-01 | 1600.45  | not significant |
| 5456 | MYO9A        | -1.00 | 8.86E-01 | 9.56E-01 | 954.54   | not significant |
| 5457 | CCDC73       | -1.00 | 4.40E-01 | NA       | 44.63    | not significant |
| 5458 | HIST1H2BI    | -1.00 | 6.31E-01 | NA       | 16.52    | not significant |
| 5459 | LCA5L        | -1.00 | 5.49E-01 | NA       | 9.47     | not significant |
| 5460 | PRKAB2       | -1.00 | 7.51E-01 | NA       | 36.59    | not significant |
| 5461 | LOC102288414 | -1.00 | 4.98E-01 | NA       | 7.91     | not significant |
| 5462 | F8           | -1.00 | 7.05E-01 | NA       | 24.74    | not significant |
| 5463 | RPL23A       | -1.00 | 9.00E-01 | 9.62E-01 | 7706.59  | not significant |
| 5464 | CSRP2BP      | -1.00 | 9.03E-01 | 9.63E-01 | 1152.40  | not significant |
| 5465 | ARFRP1       | -1.00 | 9.03E-01 | 9.63E-01 | 1147.22  | not significant |
| 5466 | F2RL2        | -1.00 | 8.93E-01 | 9.60E-01 | 342.41   | not significant |
| 5467 | TMEM2        | -1.00 | 8.92E-01 | 9.60E-01 | 1015.70  | not significant |
| 5468 | PRRG2        | -1.00 | 5.92E-01 | NA       | 11.07    | not significant |
| 5469 | HIST1H2BL    | -1.00 | 6.94E-01 | NA       | 19.95    | not significant |
| 5470 | CD8B         | -1.00 | 6.70E-01 | NA       | 16.89    | not significant |
| 5471 | CASC14       | -1.00 | 7.54E-01 | NA       | 34.47    | not significant |
| 5472 | GPR3         | -1.00 | 8.23E-01 | NA       | 64.66    | not significant |
| 5473 | LINC00936    | -1.00 | 7.11E-01 | NA       | 22.52    | not significant |
| 5474 | RORB         | -1.00 | 8.29E-01 | NA       | 53.96    | not significant |
| 5475 | PPM1E        | -1.00 | 8.32E-01 | NA       | 74.86    | not significant |
| 5476 | LOC100289511 | -1.00 | 6.90E-01 | NA       | 20.13    | not significant |
| 5477 | PRSS27       | -1.00 | 5.79E-01 | NA       | 10.22    | not significant |
| 5478 | RP9          | -1.00 | 9.06E-01 | 9.64E-01 | 534.91   | not significant |
| 5479 | LRP5L        | -1.00 | 8.78E-01 | 9.52E-01 | 205.05   | not significant |
| 5480 | PODXL        | -1.00 | 8.54E-01 | 9.40E-01 | 208.52   | not significant |
| 5481 | FKBP8        | -1.00 | 8.94E-01 | 9.60E-01 | 5431.34  | not significant |
| 5482 | RPL7A        | -1.00 | 8.87E-01 | 9.57E-01 | 14178.78 | not significant |
| 5483 | RNF144A-AS1  | -1.00 | 9.06E-01 | 9.64E-01 | 405.54   | not significant |
| 5484 | ZNF570       | -1.00 | 8.83E-01 | 9.55E-01 | 212.69   | not significant |
| 5485 | MED24        | -1.00 | 8.92E-01 | 9.60E-01 | 4386.17  | not significant |
| 5486 | RBM17        | -1.00 | 9.00E-01 | 9.62E-01 | 5528.58  | not significant |
| 5487 | EEF2K        | -1.00 | 9.06E-01 | 9.64E-01 | 2062.08  | not significant |
| 5488 | CCDC134      | -1.00 | 8.94E-01 | 9.60E-01 | 345.72   | not significant |
| 5489 | ITPRL1       | -1.00 | 9.08E-01 | 9.64E-01 | 1234.64  | not significant |
| 5490 | ATP6V1C2     | -1.00 | 4.80E-01 | NA       | 74.02    | not significant |
| 5491 | LOC100128568 | -1.00 | 6.34E-01 | NA       | 11.98    | not significant |
| 5492 | HIST1H1B     | -1.00 | 6.73E-01 | NA       | 55.64    | not significant |
| 5493 | PTGER3       | -1.00 | 7.66E-01 | NA       | 32.62    | not significant |
| 5494 | CNTNAP1      | -1.00 | 5.71E-01 | NA       | 9.53     | not significant |
| 5495 | OAZ3         | -1.00 | 6.75E-01 | NA       | 15.30    | not significant |
| 5496 | LOC100862671 | -1.00 | 8.92E-01 | 9.60E-01 | 269.78   | not significant |
| 5497 | LOC653712    | -1.00 | 6.72E-01 | NA       | 16.57    | not significant |
| 5498 | GS1-259H13.2 | -1.00 | 8.43E-01 | NA       | 78.91    | not significant |
| 5499 | DHRS4L1      | -1.00 | 8.15E-01 | NA       | 55.61    | not significant |
| 5500 | ZNF84        | -1.00 | 8.56E-01 | NA       | 98.81    | not significant |
| 5501 | MDP1         | -1.00 | 7.44E-01 | NA       | 29.06    | not significant |
| 5502 | CFL1P1       | -1.00 | 6.07E-01 | NA       | 12.30    | not significant |
| 5503 | NFIL3        | -1.00 | 8.08E-01 | NA       | 48.02    | not significant |
| 5504 | MED31        | -1.00 | 9.01E-01 | 9.63E-01 | 295.22   | not significant |
| 5505 | CHAT         | -1.00 | 8.67E-01 | 9.47E-01 | 123.46   | not significant |
| 5506 | NAIF1        | -1.00 | 9.05E-01 | 9.64E-01 | 421.19   | not significant |
| 5507 | TNFSF4       | -1.00 | 9.09E-01 | 9.65E-01 | 401.24   | not significant |
| 5508 | SCYL1        | -1.00 | 9.07E-01 | 9.64E-01 | 2246.96  | not significant |
| 5509 | FAM179B      | -1.00 | 8.65E-01 | 9.45E-01 | 155.10   | not significant |
| 5510 | EPS8L2       | -1.00 | 6.04E-01 | NA       | 10.45    | not significant |
| 5511 | NEK11        | -1.00 | 6.37E-01 | NA       | 11.66    | not significant |
| 5512 | LOC101929099 | -1.00 | 6.79E-01 | NA       | 14.95    | not significant |
| 5513 | BCDIN3D-AS1  | -1.00 | 6.36E-01 | NA       | 12.16    | not significant |
| 5514 | LOC100130093 | -1.00 | 6.35E-01 | NA       | 13.35    | not significant |
| 5515 | PKIG         | -1.00 | 8.59E-01 | NA       | 90.90    | not significant |
| 5516 | HIST1H2AI    | -1.00 | 6.55E-01 | NA       | 12.97    | not significant |
| 5517 | ADPRHL1      | -1.00 | 7.68E-01 | NA       | 30.62    | not significant |
| 5518 | FDXACB1      | -1.00 | 7.77E-01 | NA       | 35.97    | not significant |
| 5519 | CSRP2        | -1.00 | 7.17E-01 | NA       | 21.45    | not significant |
| 5520 | LXN          | -1.00 | 8.50E-01 | NA       | 82.70    | not significant |
| 5521 | TNS4         | -1.00 | 8.71E-01 | 9.49E-01 | 142.73   | not significant |
| 5522 | DPF1         | -1.00 | 8.84E-01 | 9.56E-01 | 160.94   | not significant |
| 5523 | PFDN5        | -1.00 | 9.16E-01 | 9.68E-01 | 4092.36  | not significant |
| 5524 | MLST8        | -1.00 | 9.13E-01 | 9.67E-01 | 2188.95  | not significant |
| 5525 | PRR14        | -1.00 | 9.89E-01 | 9.97E-01 | 1559.84  | not significant |
| 5526 | RASGRP1      | -1.00 | 9.11E-01 | 9.66E-01 | 2246.47  | not significant |
| 5527 | MBOAT7       | -1.00 | 9.07E-01 | 9.64E-01 | 670.43   | not significant |
| 5528 | FNTB         | -1.00 | 7.95E-01 | NA       | 39.85    | not significant |
| 5529 | FAM195A      | -1.00 | 7.19E-01 | NA       | 20.46    | not significant |
| 5530 | TAF7L        | -1.00 | 5.97E-01 | NA       | 8.74     | not significant |
| 5531 | LEAP2        | -1.00 | 7.58E-01 | NA       | 29.26    | not significant |

|      |              |       |          |          |          |                 |
|------|--------------|-------|----------|----------|----------|-----------------|
| 5532 | SH3PXD2A-AS1 | -1.00 | 7.11E-01 | NA       | 17.35    | not significant |
| 5533 | LRP2BP       | -1.00 | 7.46E-01 | NA       | 24.56    | not significant |
| 5534 | PHKA1        | -1.00 | 7.92E-01 | NA       | 39.17    | not significant |
| 5535 | PANO         | -1.00 | 8.45E-01 | NA       | 71.91    | not significant |
| 5536 | CTNNAL1      | -1.00 | 9.14E-01 | 9.67E-01 | 950.88   | not significant |
| 5537 | ZNF44        | -1.00 | 9.13E-01 | 9.67E-01 | 431.17   | not significant |
| 5538 | ST3GAL5      | -1.00 | 9.05E-01 | 9.64E-01 | 529.85   | not significant |
| 5539 | TDRD3        | -1.00 | 9.12E-01 | 9.66E-01 | 503.52   | not significant |
| 5540 | MGC57346     | -1.00 | 9.27E-01 | 9.73E-01 | 223.30   | not significant |
| 5541 | MAX          | -1.00 | 9.17E-01 | 9.68E-01 | 5084.44  | not significant |
| 5542 | RNF187       | -1.00 | 9.15E-01 | 9.68E-01 | 5206.38  | not significant |
| 5543 | EBPL         | -1.00 | 9.16E-01 | 9.68E-01 | 1139.45  | not significant |
| 5544 | CPSF3        | -1.00 | 9.11E-01 | 9.66E-01 | 2727.74  | not significant |
| 5545 | KATNB1       | -1.00 | 9.16E-01 | 9.68E-01 | 1455.58  | not significant |
| 5546 | SCML2        | -1.00 | 9.12E-01 | 9.66E-01 | 2026.24  | not significant |
| 5547 | EPHB4        | -1.00 | 8.91E-01 | 9.60E-01 | 212.72   | not significant |
| 5548 | SLC17A9      | -1.00 | 6.19E-01 | NA       | 9.39     | not significant |
| 5549 | SOX7         | -1.00 | 7.58E-01 | NA       | 24.27    | not significant |
| 5550 | PNLDC1       | -1.00 | 7.24E-01 | NA       | 18.17    | not significant |
| 5551 | IQCD         | -1.00 | 6.37E-01 | NA       | 10.32    | not significant |
| 5552 | LOC101927178 | -1.00 | 5.81E-01 | NA       | 9.63     | not significant |
| 5553 | CD4          | -1.00 | 6.72E-01 | NA       | 12.79    | not significant |
| 5554 | DST          | -1.00 | 7.67E-01 | NA       | 26.87    | not significant |
| 5555 | TIMP1        | -1.00 | 8.91E-01 | 9.59E-01 | 171.88   | not significant |
| 5556 | FAM86EP      | -1.00 | 8.63E-01 | NA       | 100.09   | not significant |
| 5557 | NSMCE1       | -1.00 | 9.16E-01 | 9.68E-01 | 1541.54  | not significant |
| 5558 | REXO4        | -1.00 | 9.15E-01 | 9.67E-01 | 398.49   | not significant |
| 5559 | C10orf25     | -1.00 | 9.07E-01 | 9.64E-01 | 277.74   | not significant |
| 5560 | ICA1L        | -1.00 | 8.96E-01 | 9.61E-01 | 280.08   | not significant |
| 5561 | COL11A2      | -1.00 | 6.70E-01 | NA       | 12.54    | not significant |
| 5562 | CFP          | -1.00 | 6.87E-01 | NA       | 13.64    | not significant |
| 5563 | PDE6G        | -1.00 | 7.79E-01 | NA       | 27.84    | not significant |
| 5564 | LOC100130705 | -1.00 | 7.78E-01 | NA       | 31.15    | not significant |
| 5565 | ZNF879       | -1.00 | 7.88E-01 | NA       | 33.42    | not significant |
| 5566 | FAHD2CP      | -1.00 | 8.04E-01 | NA       | 39.62    | not significant |
| 5567 | DHX58        | -1.00 | 8.82E-01 | 9.54E-01 | 130.31   | not significant |
| 5568 | ZNF815P      | -1.00 | 8.09E-01 | NA       | 38.82    | not significant |
| 5569 | SNTG2        | -1.00 | 8.96E-01 | 9.61E-01 | 200.79   | not significant |
| 5570 | LRFN1        | -1.00 | 9.06E-01 | 9.64E-01 | 235.07   | not significant |
| 5571 | MYT1L        | -1.00 | 9.12E-01 | 9.66E-01 | 374.91   | not significant |
| 5572 | CWF19L2      | -1.00 | 9.18E-01 | 9.69E-01 | 655.96   | not significant |
| 5573 | MYL6         | -1.00 | 9.18E-01 | 9.69E-01 | 10205.77 | not significant |
| 5574 | VAC14        | -1.00 | 9.19E-01 | 9.69E-01 | 1712.61  | not significant |
| 5575 | RMI1         | -1.00 | 9.18E-01 | 9.69E-01 | 1999.18  | not significant |
| 5576 | VPS4B        | -1.00 | 8.95E-01 | 9.61E-01 | 3780.85  | not significant |
| 5577 | NCEH1        | -1.00 | 9.16E-01 | 9.68E-01 | 511.58   | not significant |
| 5578 | SEL1L3       | -1.00 | 6.50E-01 | NA       | 10.56    | not significant |
| 5579 | ASGR1        | -1.00 | 6.93E-01 | NA       | 12.89    | not significant |
| 5580 | ARHGAP5-AS1  | -1.00 | 7.73E-01 | NA       | 24.88    | not significant |
| 5581 | SEMA3G       | -1.00 | 7.00E-01 | NA       | 14.03    | not significant |
| 5582 | C7orf61      | -1.00 | 7.30E-01 | NA       | 16.19    | not significant |
| 5583 | LOC728392    | -1.00 | 8.21E-01 | NA       | 40.27    | not significant |
| 5584 | LOC730183    | -1.00 | 7.08E-01 | NA       | 15.35    | not significant |
| 5585 | RAG2         | -1.00 | 6.64E-01 | NA       | 10.69    | not significant |
| 5586 | PPP4R1L      | -1.00 | 7.72E-01 | NA       | 26.50    | not significant |
| 5587 | RASSF8-AS1   | -1.00 | 7.94E-01 | NA       | 28.91    | not significant |
| 5588 | ZNF225       | -1.00 | 9.10E-01 | 9.65E-01 | 278.29   | not significant |
| 5589 | GRB10        | -1.00 | 8.51E-01 | NA       | 57.72    | not significant |
| 5590 | RND2         | -1.00 | 8.40E-01 | NA       | 50.88    | not significant |
| 5591 | LRRC27       | -1.00 | 8.86E-01 | 9.56E-01 | 129.32   | not significant |
| 5592 | HSP90B2P     | -1.00 | 8.52E-01 | NA       | 66.63    | not significant |
| 5593 | IL22RA1      | -1.00 | 8.70E-01 | NA       | 84.65    | not significant |
| 5594 | ATP5D        | -1.00 | 9.24E-01 | 9.72E-01 | 2205.12  | not significant |
| 5595 | TTC9         | -1.00 | 9.22E-01 | 9.70E-01 | 465.10   | not significant |
| 5596 | MRPL32       | -1.00 | 9.25E-01 | 9.72E-01 | 1448.23  | not significant |
| 5597 | NCOR2        | -1.00 | 9.18E-01 | 9.68E-01 | 6137.57  | not significant |
| 5598 | DPF2         | -1.00 | 9.19E-01 | 9.69E-01 | 2876.51  | not significant |
| 5599 | GALNT8       | -1.00 | 7.82E-01 | NA       | 24.37    | not significant |
| 5600 | RASA4        | -1.00 | 7.50E-01 | NA       | 18.28    | not significant |
| 5601 | ISYNA1       | -1.00 | 8.11E-01 | NA       | 33.48    | not significant |
| 5602 | SAMD4A       | -1.00 | 7.23E-01 | NA       | 14.22    | not significant |
| 5603 | LOC100506023 | -1.00 | 7.74E-01 | NA       | 26.72    | not significant |
| 5604 | ARRDC3-AS1   | -1.00 | 6.77E-01 | NA       | 11.39    | not significant |
| 5605 | SRRM5        | -1.00 | 7.29E-01 | NA       | 17.05    | not significant |
| 5606 | MOK          | -1.00 | 7.61E-01 | NA       | 22.18    | not significant |
| 5607 | RNFT2        | -1.00 | 9.16E-01 | 9.68E-01 | 288.72   | not significant |
| 5608 | ZNF555       | -1.00 | 8.85E-01 | 9.56E-01 | 108.30   | not significant |
| 5609 | ZNF324B      | -1.00 | 8.86E-01 | 9.56E-01 | 258.75   | not significant |
| 5610 | ZNF410       | -1.00 | 9.27E-01 | 9.73E-01 | 1863.63  | not significant |
| 5611 | ZNF48        | -1.00 | 9.25E-01 | 9.72E-01 | 912.76   | not significant |
| 5612 | ZFX          | -1.00 | 9.28E-01 | 9.73E-01 | 1428.34  | not significant |
| 5613 | NSUN6        | -1.00 | 9.21E-01 | 9.70E-01 | 517.04   | not significant |
| 5614 | FAM120B      | -1.00 | 9.26E-01 | 9.72E-01 | 1493.53  | not significant |
| 5615 | NECAP1       | -1.00 | 9.21E-01 | 9.70E-01 | 982.36   | not significant |
| 5616 | POTEF        | -1.00 | 6.63E-01 | NA       | 9.42     | not significant |
| 5617 | NUP62CL      | -1.00 | 7.66E-01 | NA       | 19.20    | not significant |
| 5618 | SMPD3        | -1.00 | 7.32E-01 | NA       | 15.22    | not significant |
| 5619 | ZP3          | -1.00 | 7.22E-01 | NA       | 13.49    | not significant |

|      |              |       |          |          |          |                 |
|------|--------------|-------|----------|----------|----------|-----------------|
| 5620 | PILRB        | -1.00 | 8.11E-01 | NA       | 31.99    | not significant |
| 5621 | ZBTB20       | -1.00 | 8.20E-01 | NA       | 34.93    | not significant |
| 5622 | SLC2A6       | -1.00 | 7.46E-01 | NA       | 15.85    | not significant |
| 5623 | SMG1P2       | -1.00 | 8.74E-01 | NA       | 73.89    | not significant |
| 5624 | IL20RB       | -1.00 | 8.30E-01 | NA       | 38.56    | not significant |
| 5625 | EV15L        | -1.00 | 9.29E-01 | 9.73E-01 | 640.32   | not significant |
| 5626 | IGFBP2       | -1.00 | 9.29E-01 | 9.74E-01 | 6749.34  | not significant |
| 5627 | KIAA0586     | -1.00 | 9.30E-01 | 9.74E-01 | 1032.57  | not significant |
| 5628 | RPLP0        | -1.00 | 8.07E-01 | 9.17E-01 | 47654.10 | not significant |
| 5629 | RNF5P1       | -1.00 | 6.99E-01 | NA       | 11.23    | not significant |
| 5630 | HYMAI        | -1.00 | 7.13E-01 | NA       | 11.47    | not significant |
| 5631 | SLC22A4      | -1.00 | 7.32E-01 | NA       | 13.81    | not significant |
| 5632 | KIAA1683     | -1.00 | 6.70E-01 | NA       | 9.45     | not significant |
| 5633 | PRG2         | -1.00 | 8.11E-01 | NA       | 29.36    | not significant |
| 5634 | SUMO1P3      | -1.00 | 8.09E-01 | NA       | 26.53    | not significant |
| 5635 | TSNAXIP1     | -1.00 | 8.37E-01 | NA       | 41.21    | not significant |
| 5636 | TNFRSF1B     | -1.00 | 7.11E-01 | NA       | 11.33    | not significant |
| 5637 | HUWE1        | -1.00 | 8.77E-01 | 9.52E-01 | 5106.06  | not significant |
| 5638 | PYCR1        | -1.00 | 9.40E-01 | 9.78E-01 | 555.96   | not significant |
| 5639 | C6orf136     | -1.00 | 9.10E-01 | 9.65E-01 | 166.80   | not significant |
| 5640 | CEP76        | -1.00 | 9.28E-01 | 9.73E-01 | 559.55   | not significant |
| 5641 | KANK2        | -1.00 | 8.77E-01 | NA       | 78.14    | not significant |
| 5642 | AFG3L2       | -1.00 | 9.28E-01 | 9.73E-01 | 2840.79  | not significant |
| 5643 | MAGT1        | -1.00 | 9.32E-01 | 9.75E-01 | 625.40   | not significant |
| 5644 | GPR89A       | -1.00 | 8.02E-01 | NA       | 29.44    | not significant |
| 5645 | MYT1         | -1.00 | 7.68E-01 | NA       | 20.16    | not significant |
| 5646 | TEFM         | -1.00 | 9.29E-01 | 9.74E-01 | 238.42   | not significant |
| 5647 | FAM46C       | -1.00 | 8.27E-01 | NA       | 30.29    | not significant |
| 5648 | ZNF222       | -1.00 | 9.12E-01 | 9.66E-01 | 174.04   | not significant |
| 5649 | LOC101928063 | -1.00 | 8.16E-01 | NA       | 28.88    | not significant |
| 5650 | KRCC1        | -1.00 | 9.37E-01 | 9.77E-01 | 591.47   | not significant |
| 5651 | XRCC4        | -1.00 | 9.26E-01 | 9.72E-01 | 438.65   | not significant |
| 5652 | MED18        | -1.00 | 9.33E-01 | 9.75E-01 | 690.25   | not significant |
| 5653 | NDUFS3       | -1.00 | 9.35E-01 | 9.75E-01 | 3032.44  | not significant |
| 5654 | RPL22        | -1.00 | 9.33E-01 | 9.75E-01 | 4148.71  | not significant |
| 5655 | RPL35        | -1.00 | 9.32E-01 | 9.75E-01 | 13365.44 | not significant |
| 5656 | FAM115C      | -1.00 | 9.03E-01 | 9.63E-01 | 141.63   | not significant |
| 5657 | KLC1         | -1.00 | 9.28E-01 | 9.73E-01 | 2598.24  | not significant |
| 5658 | EPAS1        | -1.00 | 9.10E-01 | 9.65E-01 | 8626.90  | not significant |
| 5659 | TARSL2       | -1.00 | 9.22E-01 | 9.70E-01 | 282.03   | not significant |
| 5660 | LOC101928069 | -1.00 | 8.19E-01 | NA       | 24.75    | not significant |
| 5661 | ABCB9        | -1.00 | 8.71E-01 | NA       | 53.88    | not significant |
| 5662 | DDTL         | -1.00 | 6.80E-01 | NA       | 8.88     | not significant |
| 5663 | SETSIP       | -1.00 | 8.19E-01 | NA       | 28.37    | not significant |
| 5664 | ZBED5-AS1    | -1.00 | 8.84E-01 | NA       | 69.66    | not significant |
| 5665 | PTCRA        | -1.00 | 7.18E-01 | NA       | 11.03    | not significant |
| 5666 | CCDC74A      | -1.00 | 9.02E-01 | NA       | 96.97    | not significant |
| 5667 | ENTPD1-AS1   | -1.00 | 8.74E-01 | NA       | 57.04    | not significant |
| 5668 | ALKBH2       | -1.00 | 9.38E-01 | 9.77E-01 | 984.51   | not significant |
| 5669 | NTAN1        | -1.00 | 9.37E-01 | 9.77E-01 | 1017.35  | not significant |
| 5670 | MKX          | -1.00 | 8.68E-01 | NA       | 50.19    | not significant |
| 5671 | KRTCAP2      | -1.00 | 9.33E-01 | 9.75E-01 | 1408.61  | not significant |
| 5672 | ABI1         | -1.00 | 9.30E-01 | 9.74E-01 | 2150.49  | not significant |
| 5673 | TOLLIP       | -1.00 | 9.39E-01 | 9.78E-01 | 1589.45  | not significant |
| 5674 | MANEAL       | -1.00 | 9.36E-01 | 9.76E-01 | 943.82   | not significant |
| 5675 | VAV1         | -1.00 | 9.28E-01 | 9.73E-01 | 5005.60  | not significant |
| 5676 | SLX4IP       | -1.00 | 9.20E-01 | 9.69E-01 | 194.00   | not significant |
| 5677 | UGP2         | -1.00 | 9.42E-01 | 9.79E-01 | 10589.69 | not significant |
| 5678 | ZNF43        | -1.00 | 9.43E-01 | 9.79E-01 | 588.20   | not significant |
| 5679 | SNX19        | -1.00 | 9.37E-01 | 9.77E-01 | 3509.17  | not significant |
| 5680 | CHML         | -1.00 | 9.37E-01 | 9.77E-01 | 2400.12  | not significant |
| 5681 | LINC00539    | -1.00 | 8.38E-01 | NA       | 29.11    | not significant |
| 5682 | THBS1        | -1.00 | 6.94E-01 | NA       | 9.07     | not significant |
| 5683 | LAMC3        | -1.00 | 7.57E-01 | NA       | 13.99    | not significant |
| 5684 | NKX3-2       | -1.00 | 7.75E-01 | NA       | 15.95    | not significant |
| 5685 | LOC100133985 | -1.00 | 7.47E-01 | NA       | 11.80    | not significant |
| 5686 | TMEM150A     | -1.00 | 7.63E-01 | NA       | 14.20    | not significant |
| 5687 | LOC401320    | -1.00 | 9.07E-01 | 9.64E-01 | 114.92   | not significant |
| 5688 | LOC100506321 | -1.00 | 8.12E-01 | NA       | 24.68    | not significant |
| 5689 | ARG2         | -1.00 | 8.72E-01 | NA       | 48.11    | not significant |
| 5690 | ZNHIT2       | -1.00 | 9.27E-01 | 9.73E-01 | 248.47   | not significant |
| 5691 | FRA10AC1     | -1.00 | 9.40E-01 | 9.78E-01 | 618.30   | not significant |
| 5692 | SLC7A5P2     | -1.00 | 8.86E-01 | NA       | 67.70    | not significant |
| 5693 | C1orf213     | -1.00 | 8.52E-01 | NA       | 44.10    | not significant |
| 5694 | UBA3         | -1.00 | 9.41E-01 | 9.78E-01 | 1559.60  | not significant |
| 5695 | TTC37        | -1.00 | 9.09E-01 | 9.65E-01 | 3031.59  | not significant |
| 5696 | SLC12A2      | -1.00 | 9.33E-01 | 9.75E-01 | 1103.09  | not significant |
| 5697 | IK           | -1.00 | 9.47E-01 | 9.79E-01 | 3908.59  | not significant |
| 5698 | CXorf23      | -1.00 | 9.25E-01 | 9.72E-01 | 199.32   | not significant |
| 5699 | RFX8         | -1.00 | 9.15E-01 | 9.68E-01 | 151.24   | not significant |
| 5700 | C9orf163     | -1.00 | 7.36E-01 | NA       | 9.70     | not significant |
| 5701 | DGCR6        | -1.00 | 8.00E-01 | NA       | 16.80    | not significant |
| 5702 | LINC01176    | -1.00 | 7.73E-01 | NA       | 14.85    | not significant |
| 5703 | HIST1H4B     | -1.00 | 7.37E-01 | NA       | 10.06    | not significant |
| 5704 | TMEM9B-AS1   | -1.00 | 8.77E-01 | NA       | 40.94    | not significant |
| 5705 | RAB19        | -1.00 | 8.64E-01 | NA       | 40.76    | not significant |
| 5706 | SRP14-AS1    | -1.00 | 8.08E-01 | NA       | 19.54    | not significant |
| 5707 | PROZ         | -1.00 | 9.12E-01 | 9.66E-01 | 132.33   | not significant |

|      |              |       |          |          |         |                 |
|------|--------------|-------|----------|----------|---------|-----------------|
| 5708 | SIRT4        | -1.00 | 7.86E-01 | NA       | 14.80   | not significant |
| 5709 | C2orf42      | -1.00 | 9.40E-01 | 9.78E-01 | 407.53  | not significant |
| 5710 | CCDC43       | -1.00 | 9.42E-01 | 9.79E-01 | 1418.62 | not significant |
| 5711 | HVCN1        | -1.00 | 9.42E-01 | 9.79E-01 | 827.39  | not significant |
| 5712 | ZNF677       | -1.00 | 8.88E-01 | NA       | 67.24   | not significant |
| 5713 | ZNF764       | -1.00 | 9.44E-01 | 9.79E-01 | 665.96  | not significant |
| 5714 | ENOX2        | -1.00 | 9.38E-01 | 9.77E-01 | 693.49  | not significant |
| 5715 | C14orf119    | -1.00 | 9.43E-01 | 9.79E-01 | 1489.70 | not significant |
| 5716 | ARL1         | -1.00 | 9.41E-01 | 9.78E-01 | 2185.35 | not significant |
| 5717 | FAU          | -1.00 | 9.40E-01 | 9.78E-01 | 7997.09 | not significant |
| 5718 | TMCC1        | -1.00 | 9.46E-01 | 9.79E-01 | 531.55  | not significant |
| 5719 | ZNF813       | -1.00 | 9.45E-01 | 9.79E-01 | 598.01  | not significant |
| 5720 | CSNK2B       | -1.00 | 9.65E-01 | 9.89E-01 | 2754.26 | not significant |
| 5721 | GPD2         | -1.00 | 9.32E-01 | 9.75E-01 | 289.48  | not significant |
| 5722 | SELO         | -1.00 | 9.42E-01 | 9.79E-01 | 845.81  | not significant |
| 5723 | PCNX         | -1.00 | 9.31E-01 | 9.74E-01 | 1981.32 | not significant |
| 5724 | CHMP3        | -1.00 | 8.13E-01 | NA       | 22.02   | not significant |
| 5725 | C3orf67      | -1.00 | 7.63E-01 | NA       | 11.20   | not significant |
| 5726 | PRAME        | -1.00 | 8.13E-01 | NA       | 17.52   | not significant |
| 5727 | PMP22        | -1.00 | 8.84E-01 | NA       | 57.15   | not significant |
| 5728 | DCAF13P3     | -1.00 | 7.30E-01 | NA       | 9.60    | not significant |
| 5729 | GNN          | -1.00 | 7.96E-01 | NA       | 15.95   | not significant |
| 5730 | LOC100506325 | -1.00 | 8.61E-01 | NA       | 32.56   | not significant |
| 5731 | ACTN2        | -1.00 | 7.73E-01 | NA       | 12.29   | not significant |
| 5732 | DYRK3        | -1.00 | 8.81E-01 | NA       | 47.07   | not significant |
| 5733 | MOSPD2       | -1.00 | 9.43E-01 | 9.79E-01 | 485.26  | not significant |
| 5734 | LOC102606465 | -1.00 | 9.29E-01 | 9.73E-01 | 188.91  | not significant |
| 5735 | KIAA1804     | -1.00 | 9.05E-01 | NA       | 78.50   | not significant |
| 5736 | C2orf24      | -1.00 | 9.45E-01 | 9.79E-01 | 1583.03 | not significant |
| 5737 | NUP54        | -1.00 | 9.43E-01 | 9.79E-01 | 2534.98 | not significant |
| 5738 | AURKAIP1     | -1.00 | 9.43E-01 | 9.79E-01 | 2909.26 | not significant |
| 5739 | TRMT10A      | -1.00 | 9.37E-01 | 9.77E-01 | 337.48  | not significant |
| 5740 | SEC24B       | -1.00 | 9.44E-01 | 9.79E-01 | 2016.14 | not significant |
| 5741 | TTL          | -1.00 | 9.46E-01 | 9.79E-01 | 1797.92 | not significant |
| 5742 | LOC100507316 | -1.00 | 9.03E-01 | NA       | 86.96   | not significant |
| 5743 | LOC101927166 | -1.00 | 8.47E-01 | NA       | 25.37   | not significant |
| 5744 | LINC01144    | -1.00 | 8.55E-01 | NA       | 27.18   | not significant |
| 5745 | CLK2P        | -1.00 | 7.89E-01 | NA       | 12.15   | not significant |
| 5746 | SPATS2L      | -1.00 | 7.59E-01 | NA       | 9.60    | not significant |
| 5747 | FAM71F2      | -1.00 | 7.51E-01 | NA       | 9.44    | not significant |
| 5748 | IL411        | -1.00 | 7.86E-01 | NA       | 14.77   | not significant |
| 5749 | IPO9-AS1     | -1.00 | 8.22E-01 | NA       | 18.03   | not significant |
| 5750 | FAM13A-AS1   | -1.00 | 7.80E-01 | NA       | 12.05   | not significant |
| 5751 | HMGCL        | -1.00 | 9.49E-01 | 9.80E-01 | 338.94  | not significant |
| 5752 | THAP8        | -1.00 | 9.38E-01 | 9.77E-01 | 250.11  | not significant |
| 5753 | BLVRA        | -1.00 | 9.47E-01 | 9.80E-01 | 846.10  | not significant |
| 5754 | P4HTM        | -1.00 | 8.98E-01 | NA       | 57.99   | not significant |
| 5755 | ECE2         | -1.00 | 9.46E-01 | 9.79E-01 | 457.87  | not significant |
| 5756 | EIF2D        | -1.00 | 9.47E-01 | 9.80E-01 | 1114.25 | not significant |
| 5757 | ZNF550       | -1.00 | 9.43E-01 | 9.79E-01 | 802.94  | not significant |
| 5758 | KLHDC4       | -1.00 | 9.45E-01 | 9.79E-01 | 1542.63 | not significant |
| 5759 | WDR81        | -1.00 | 9.50E-01 | 9.81E-01 | 1046.17 | not significant |
| 5760 | TSC2         | -1.00 | 9.94E-01 | 9.99E-01 | 2546.54 | not significant |
| 5761 | SH3GL1P1     | -1.00 | 8.17E-01 | NA       | 14.46   | not significant |
| 5762 | CYTH4        | -1.00 | 8.39E-01 | NA       | 18.71   | not significant |
| 5763 | PGPEP1L      | -1.00 | 8.29E-01 | NA       | 18.13   | not significant |
| 5764 | ZNF491       | -1.00 | 9.17E-01 | NA       | 89.61   | not significant |
| 5765 | ZSWIM5       | -1.00 | 9.24E-01 | 9.72E-01 | 102.50  | not significant |
| 5766 | EVA1B        | -1.00 | 7.58E-01 | NA       | 9.29    | not significant |
| 5767 | ZNF100       | -1.00 | 9.15E-01 | NA       | 76.75   | not significant |
| 5768 | CFAP20       | -1.00 | 9.81E-01 | 9.95E-01 | 3154.63 | not significant |
| 5769 | C11orf57     | -1.00 | 9.50E-01 | 9.81E-01 | 2068.97 | not significant |
| 5770 | EZR-AS1      | -1.00 | 7.67E-01 | NA       | 8.63    | not significant |
| 5771 | C19orf71     | -1.00 | 8.26E-01 | NA       | 15.21   | not significant |
| 5772 | AVIL         | -1.00 | 8.67E-01 | NA       | 25.08   | not significant |
| 5773 | AOAH         | -1.00 | 8.32E-01 | NA       | 16.58   | not significant |
| 5774 | ZNF275       | -1.00 | 8.77E-01 | NA       | 32.95   | not significant |
| 5775 | SH2D7        | -1.00 | 7.80E-01 | NA       | 10.41   | not significant |
| 5776 | N4BP2L2-IT2  | -1.00 | 8.98E-01 | NA       | 46.22   | not significant |
| 5777 | LOC101929698 | -1.00 | 7.71E-01 | NA       | 9.25    | not significant |
| 5778 | GUCY1B2      | -1.00 | 8.25E-01 | NA       | 17.61   | not significant |
| 5779 | FSIP1        | -1.00 | 8.56E-01 | NA       | 23.26   | not significant |
| 5780 | CHMP4A       | -1.00 | 9.55E-01 | 9.83E-01 | 1330.48 | not significant |
| 5781 | LINC00954    | -1.00 | 8.30E-01 | NA       | 17.24   | not significant |
| 5782 | TXNDC17      | -1.00 | 9.54E-01 | 9.83E-01 | 1088.31 | not significant |
| 5783 | DEX1         | -1.00 | 9.55E-01 | 9.83E-01 | 613.56  | not significant |
| 5784 | DEF6         | -1.00 | 9.43E-01 | 9.79E-01 | 4063.87 | not significant |
| 5785 | STK38        | -1.00 | 9.98E-01 | 1.00E+00 | 2683.23 | not significant |
| 5786 | UFSP1        | -1.00 | 8.66E-01 | NA       | 21.71   | not significant |
| 5787 | NDUFA6-AS1   | -1.00 | 7.92E-01 | NA       | 9.36    | not significant |
| 5788 | MYLK2        | -1.00 | 6.28E-01 | NA       | 29.13   | not significant |
| 5789 | TGM5         | -1.00 | 7.89E-01 | NA       | 9.13    | not significant |
| 5790 | RNF157-AS1   | -1.00 | 8.24E-01 | NA       | 11.97   | not significant |
| 5791 | BDNF-AS      | -1.00 | 8.15E-01 | NA       | 11.24   | not significant |
| 5792 | FAM151B      | -1.00 | 8.25E-01 | NA       | 12.70   | not significant |
| 5793 | LINC01237    | -1.00 | 8.81E-01 | NA       | 28.14   | not significant |
| 5794 | KANK1        | -1.00 | 9.17E-01 | NA       | 56.96   | not significant |
| 5795 | NEO1         | -1.00 | 8.38E-01 | NA       | 15.50   | not significant |

|      |              |       |          |          |          |                 |
|------|--------------|-------|----------|----------|----------|-----------------|
| 5796 | L3HYPDH      | -1.00 | 9.31E-01 | NA       | 98.67    | not significant |
| 5797 | PTRHD1       | -1.00 | 9.53E-01 | 9.82E-01 | 453.85   | not significant |
| 5798 | MRPS34       | -1.00 | 9.52E-01 | 9.82E-01 | 3718.96  | not significant |
| 5799 | ETV4         | -1.00 | 8.50E-01 | NA       | 18.43    | not significant |
| 5800 | SLC35G1      | -1.00 | 9.40E-01 | 9.78E-01 | 148.46   | not significant |
| 5801 | PTCH1        | -1.00 | 9.29E-01 | NA       | 82.04    | not significant |
| 5802 | DND1         | -1.00 | 8.96E-01 | NA       | 39.05    | not significant |
| 5803 | AFMID        | -1.00 | 9.51E-01 | 9.82E-01 | 331.42   | not significant |
| 5804 | CASC3        | -1.00 | 9.49E-01 | 9.81E-01 | 4647.36  | not significant |
| 5805 | CCAR2        | -1.00 | 9.47E-01 | 9.79E-01 | 10734.63 | not significant |
| 5806 | PDLIM4       | -1.00 | 8.25E-01 | NA       | 11.38    | not significant |
| 5807 | LOC643072    | -1.00 | 8.18E-01 | NA       | 10.15    | not significant |
| 5808 | LINC00310    | -1.00 | 8.08E-01 | NA       | 9.34     | not significant |
| 5809 | ARHGAP22     | -1.00 | 8.48E-01 | NA       | 14.64    | not significant |
| 5810 | HIST1H1D     | -1.00 | 9.08E-01 | NA       | 44.86    | not significant |
| 5811 | SIRPB1       | -1.00 | 7.99E-01 | NA       | 8.07     | not significant |
| 5812 | PWARSN       | -1.00 | 9.09E-01 | NA       | 47.77    | not significant |
| 5813 | TRIM9        | -1.00 | 8.92E-01 | NA       | 33.29    | not significant |
| 5814 | POBEC3H      | -1.00 | 9.54E-01 | 9.83E-01 | 169.13   | not significant |
| 5815 | CDKL5        | -1.00 | 8.39E-01 | NA       | 13.25    | not significant |
| 5816 | RTCA-AS1     | -1.00 | 7.95E-01 | NA       | 8.70     | not significant |
| 5817 | CDC26        | -1.00 | 9.46E-01 | 9.79E-01 | 142.16   | not significant |
| 5818 | FICD         | -1.00 | 9.44E-01 | 9.79E-01 | 138.07   | not significant |
| 5819 | TOE1         | -1.00 | 9.59E-01 | 9.86E-01 | 1772.57  | not significant |
| 5820 | MTFR2        | -1.00 | 9.57E-01 | 9.84E-01 | 763.46   | not significant |
| 5821 | PDIA3        | -1.00 | 9.04E-01 | 9.63E-01 | 9934.01  | not significant |
| 5822 | ZNF200       | -1.00 | 9.59E-01 | 9.86E-01 | 1070.22  | not significant |
| 5823 | MGAT1        | -1.00 | 9.57E-01 | 9.84E-01 | 3950.56  | not significant |
| 5824 | NUP205       | -1.00 | 9.54E-01 | 9.83E-01 | 8065.51  | not significant |
| 5825 | SWAP70       | -1.00 | 9.30E-01 | 9.74E-01 | 2453.81  | not significant |
| 5826 | MCM9         | -1.00 | 9.50E-01 | 9.81E-01 | 1012.29  | not significant |
| 5827 | B4GALNT3     | -1.00 | 8.87E-01 | NA       | 24.28    | not significant |
| 5828 | CDK20        | -1.00 | 9.24E-01 | NA       | 57.88    | not significant |
| 5829 | ANP32AP1     | -1.00 | 8.62E-01 | NA       | 16.69    | not significant |
| 5830 | PINLYP       | -1.00 | 9.59E-01 | 9.86E-01 | 397.78   | not significant |
| 5831 | CNIH2        | -1.00 | 8.96E-01 | NA       | 36.12    | not significant |
| 5832 | HR           | -1.00 | 8.89E-01 | NA       | 25.71    | not significant |
| 5833 | ALDH4A1      | -1.00 | 9.55E-01 | 9.83E-01 | 246.45   | not significant |
| 5834 | C17orf89     | -1.00 | 9.54E-01 | 9.83E-01 | 2520.83  | not significant |
| 5835 | BMP4         | -1.00 | 9.66E-01 | 9.89E-01 | 399.53   | not significant |
| 5836 | NRN1         | -1.00 | 9.61E-01 | 9.87E-01 | 3289.92  | not significant |
| 5837 | PGP          | -1.00 | 9.61E-01 | 9.87E-01 | 1713.84  | not significant |
| 5838 | TBCB         | -1.00 | 9.62E-01 | 9.88E-01 | 2910.43  | not significant |
| 5839 | BRAT1        | -1.00 | 9.84E-01 | 9.96E-01 | 2868.62  | not significant |
| 5840 | OPA1         | -1.00 | 9.56E-01 | 9.84E-01 | 4801.62  | not significant |
| 5841 | LINC01252    | -1.00 | 8.34E-01 | NA       | 10.57    | not significant |
| 5842 | C9orf3       | -1.00 | 9.42E-01 | 9.79E-01 | 104.62   | not significant |
| 5843 | HIST1H4A     | -1.00 | 9.08E-01 | NA       | 28.20    | not significant |
| 5844 | UBTD1        | -1.00 | 9.00E-01 | NA       | 26.89    | not significant |
| 5845 | LOC101929374 | -1.00 | 9.08E-01 | NA       | 30.66    | not significant |
| 5846 | C3orf20      | -1.00 | 8.05E-01 | NA       | 7.50     | not significant |
| 5847 | TRIM39       | -1.00 | 8.25E-01 | NA       | 9.36     | not significant |
| 5848 | DHRS12       | -1.00 | 9.15E-01 | NA       | 37.97    | not significant |
| 5849 | ZNHIT3       | -1.00 | 9.67E-01 | 9.90E-01 | 314.20   | not significant |
| 5850 | FAM66D       | -1.00 | 8.60E-01 | NA       | 12.94    | not significant |
| 5851 | LOC643733    | -1.00 | 9.25E-01 | NA       | 32.66    | not significant |
| 5852 | SLC27A5      | -1.00 | 9.55E-01 | 9.83E-01 | 228.87   | not significant |
| 5853 | PRPF31       | -1.00 | 9.63E-01 | 9.88E-01 | 1529.24  | not significant |
| 5854 | TSSC1        | -1.00 | 9.67E-01 | 9.90E-01 | 1906.41  | not significant |
| 5855 | ZFP41        | -1.00 | 9.61E-01 | 9.87E-01 | 519.07   | not significant |
| 5856 | LPCAT1       | -1.00 | 9.60E-01 | 9.87E-01 | 6667.25  | not significant |
| 5857 | ACAP2        | -1.00 | 9.65E-01 | 9.89E-01 | 5007.20  | not significant |
| 5858 | TRIM56       | -1.00 | 1.00E+00 | 1.00E+00 | 1681.21  | not significant |
| 5859 | FBXL13       | -1.00 | 9.18E-01 | NA       | 37.47    | not significant |
| 5860 | F12          | -1.00 | 8.74E-01 | NA       | 14.97    | not significant |
| 5861 | EOGT         | -1.00 | 9.46E-01 | NA       | 90.62    | not significant |
| 5862 | GPHN         | -1.00 | 9.03E-01 | NA       | 21.55    | not significant |
| 5863 | P2RX1        | -1.00 | 9.09E-01 | NA       | 31.71    | not significant |
| 5864 | COL9A2       | -1.00 | 9.27E-01 | NA       | 39.78    | not significant |
| 5865 | SLC4A10      | -1.00 | 8.40E-01 | 9.32E-01 | 172.01   | not significant |
| 5866 | KCTD6        | -1.00 | 9.52E-01 | 9.82E-01 | 149.89   | not significant |
| 5867 | FLJ37035     | -1.00 | 8.70E-01 | NA       | 12.55    | not significant |
| 5868 | LRRC37A      | -1.00 | 8.99E-01 | NA       | 14.18    | not significant |
| 5869 | POMZP3       | -1.00 | 9.52E-01 | 9.82E-01 | 108.71   | not significant |
| 5870 | GDF9         | -1.00 | 9.04E-01 | NA       | 25.87    | not significant |
| 5871 | PTPRE        | -1.00 | 9.62E-01 | 9.88E-01 | 667.78   | not significant |
| 5872 | MRPL43       | -1.00 | 9.69E-01 | 9.91E-01 | 1531.70  | not significant |
| 5873 | RPS5         | -1.00 | 9.78E-01 | 9.94E-01 | 23449.13 | not significant |
| 5874 | ACO1         | -1.00 | 9.69E-01 | 9.91E-01 | 1304.54  | not significant |
| 5875 | UBR5         | -1.00 | 9.57E-01 | 9.84E-01 | 6948.38  | not significant |
| 5876 | KDM7A        | -1.00 | 9.67E-01 | 9.90E-01 | 597.56   | not significant |
| 5877 | SMG1P1       | -1.00 | 9.30E-01 | NA       | 63.09    | not significant |
| 5878 | ACTA1        | -1.00 | 8.62E-01 | NA       | 10.66    | not significant |
| 5879 | TIPARP-AS1   | -1.00 | 8.50E-01 | NA       | 8.96     | not significant |
| 5880 | C19orf73     | -1.00 | 8.85E-01 | NA       | 12.98    | not significant |
| 5881 | MCF2L        | -1.00 | 9.17E-01 | NA       | 23.25    | not significant |
| 5882 | TMEM232      | -1.00 | 8.75E-01 | NA       | 12.85    | not significant |
| 5883 | TMLHE        | -1.00 | 9.39E-01 | NA       | 62.77    | not significant |

|      |              |       |          |          |          |                 |
|------|--------------|-------|----------|----------|----------|-----------------|
| 5884 | KLRAP1       | -1.00 | 9.55E-01 | 9.83E-01 | 156.45   | not significant |
| 5885 | RBM44        | -1.00 | 9.32E-01 | NA       | 41.52    | not significant |
| 5886 | UPF3A        | -1.00 | 9.69E-01 | 9.91E-01 | 719.80   | not significant |
| 5887 | RBM48        | -1.00 | 9.76E-01 | 9.94E-01 | 608.69   | not significant |
| 5888 | NOP10        | -1.00 | 9.72E-01 | 9.92E-01 | 2413.79  | not significant |
| 5889 | RAB5A        | -1.00 | 9.71E-01 | 9.92E-01 | 1806.27  | not significant |
| 5890 | GLUL         | -1.00 | 9.57E-01 | 9.84E-01 | 23702.72 | not significant |
| 5891 | PCNXL3       | -1.00 | 9.69E-01 | 9.91E-01 | 4247.29  | not significant |
| 5892 | C11orf95     | -1.00 | 9.73E-01 | 9.92E-01 | 1350.22  | not significant |
| 5893 | CHST10       | -1.00 | 9.72E-01 | 9.92E-01 | 1307.59  | not significant |
| 5894 | PHLDB2       | -1.00 | 9.68E-01 | 9.90E-01 | 369.23   | not significant |
| 5895 | DQX1         | -1.00 | 8.79E-01 | NA       | 11.74    | not significant |
| 5896 | TCN2         | -1.00 | 9.00E-01 | NA       | 16.14    | not significant |
| 5897 | PIN4P1       | -1.00 | 8.44E-01 | NA       | 8.98     | not significant |
| 5898 | DBH          | -1.00 | 9.11E-01 | NA       | 17.91    | not significant |
| 5899 | SMG1P5       | -1.00 | 9.15E-01 | NA       | 20.88    | not significant |
| 5900 | CLCA1        | -1.00 | 8.76E-01 | NA       | 11.42    | not significant |
| 5901 | FLJ27354     | -1.00 | 8.76E-01 | NA       | 9.82     | not significant |
| 5902 | DISP2        | -1.00 | 8.70E-01 | NA       | 9.19     | not significant |
| 5903 | HIST1H2BO    | -1.00 | 9.19E-01 | NA       | 22.96    | not significant |
| 5904 | CNKSR1       | -1.00 | 8.83E-01 | NA       | 10.99    | not significant |
| 5905 | RP1L1        | -1.00 | 8.66E-01 | NA       | 8.81     | not significant |
| 5906 | RAD51B       | -1.00 | 9.72E-01 | 9.92E-01 | 350.32   | not significant |
| 5907 | CCS          | -1.00 | 9.78E-01 | 9.95E-01 | 324.44   | not significant |
| 5908 | AMACR        | -1.00 | 9.33E-01 | NA       | 34.38    | not significant |
| 5909 | SSNA1        | -1.00 | 9.73E-01 | 9.92E-01 | 2143.11  | not significant |
| 5910 | TRNAU1AP     | -1.00 | 9.71E-01 | 9.92E-01 | 739.01   | not significant |
| 5911 | CLTA         | -1.00 | 9.71E-01 | 9.92E-01 | 4442.78  | not significant |
| 5912 | PNN          | -1.00 | 9.64E-01 | 9.88E-01 | 7854.71  | not significant |
| 5913 | LINC00926    | -1.00 | 9.25E-01 | NA       | 27.67    | not significant |
| 5914 | RFFL         | -1.00 | 9.32E-01 | NA       | 34.50    | not significant |
| 5915 | KIAA0922     | -1.00 | 9.76E-01 | 9.94E-01 | 3556.54  | not significant |
| 5916 | SLC45A3      | -1.00 | 9.26E-01 | NA       | 31.98    | not significant |
| 5917 | TBC1D25      | -1.00 | 9.50E-01 | NA       | 58.23    | not significant |
| 5918 | PGM2L1       | -1.00 | 9.71E-01 | 9.92E-01 | 1118.79  | not significant |
| 5919 | SCAF4        | -1.00 | 9.97E-01 | 1.00E+00 | 4794.01  | not significant |
| 5920 | MYCBP2       | -1.00 | 9.79E-01 | 9.95E-01 | 6156.32  | not significant |
| 5921 | SLC25A35     | -1.00 | 9.63E-01 | 9.88E-01 | 119.46   | not significant |
| 5922 | OTOF         | -1.00 | 9.07E-01 | NA       | 11.39    | not significant |
| 5923 | JUP          | -1.00 | 8.99E-01 | NA       | 10.39    | not significant |
| 5924 | SCARF1       | -1.00 | 9.08E-01 | NA       | 14.59    | not significant |
| 5925 | ROGDI        | -1.00 | 9.14E-01 | NA       | 100.06   | not significant |
| 5926 | CASC10       | -1.00 | 9.28E-01 | NA       | 21.04    | not significant |
| 5927 | ZNF81        | -1.00 | 9.04E-01 | NA       | 14.00    | not significant |
| 5928 | GAB3         | -1.00 | 9.66E-01 | 9.90E-01 | 132.68   | not significant |
| 5929 | TSTD3        | -1.00 | 9.09E-01 | NA       | 15.58    | not significant |
| 5930 | ZNF718       | -1.00 | 9.54E-01 | NA       | 53.57    | not significant |
| 5931 | MRPS28       | -1.00 | 9.77E-01 | 9.94E-01 | 1453.47  | not significant |
| 5932 | COMT         | -1.00 | 9.65E-01 | 9.89E-01 | 2747.35  | not significant |
| 5933 | SPATA24      | -1.00 | 9.48E-01 | NA       | 42.32    | not significant |
| 5934 | GLUD2        | -1.00 | 9.63E-01 | 9.88E-01 | 120.26   | not significant |
| 5935 | GABRR2       | -1.00 | 8.92E-01 | NA       | 11.55    | not significant |
| 5936 | ABL1         | -1.00 | 9.73E-01 | 9.92E-01 | 3373.49  | not significant |
| 5937 | SLC26A4      | -1.00 | 8.93E-01 | NA       | 28.69    | not significant |
| 5938 | HAL          | -1.00 | 8.87E-01 | NA       | 8.18     | not significant |
| 5939 | KMT2C        | -1.00 | 8.86E-01 | 8.53E-01 | 4131.29  | not significant |
| 5940 | MID1         | -1.00 | 9.22E-01 | NA       | 14.62    | not significant |
| 5941 | KIF4B        | -1.00 | 9.07E-01 | NA       | 11.33    | not significant |
| 5942 | TAGLN        | -1.00 | 9.36E-01 | NA       | 23.79    | not significant |
| 5943 | HPGDS        | -1.00 | 9.01E-01 | NA       | 9.53     | not significant |
| 5944 | CKAP4        | -1.00 | 9.10E-01 | NA       | 9.75     | not significant |
| 5945 | TMM8A        | -1.00 | 8.99E-01 | NA       | 9.89     | not significant |
| 5946 | GLIPR1L2     | -1.00 | 8.94E-01 | NA       | 9.14     | not significant |
| 5947 | WTIP         | -1.00 | 9.64E-01 | NA       | 77.00    | not significant |
| 5948 | GPR142       | -1.00 | 9.19E-01 | NA       | 11.83    | not significant |
| 5949 | DLX4         | -1.00 | 9.09E-01 | NA       | 9.64     | not significant |
| 5950 | GALNT4       | -1.00 | 9.15E-01 | NA       | 12.27    | not significant |
| 5951 | TRMT10B      | -1.00 | 9.72E-01 | 9.92E-01 | 361.71   | not significant |
| 5952 | HOXB-AS1     | -1.00 | 5.85E-02 | 2.18E-01 | 128.71   | not significant |
| 5953 | PRPS2        | -1.00 | 9.79E-01 | 9.95E-01 | 3513.44  | not significant |
| 5954 | TM7SF3       | -1.00 | 9.80E-01 | 9.95E-01 | 8254.10  | not significant |
| 5955 | ITM2C        | -1.00 | 9.79E-01 | 9.95E-01 | 5417.74  | not significant |
| 5956 | SMARCA4      | -1.00 | 9.74E-01 | 9.92E-01 | 12837.79 | not significant |
| 5957 | AGPAT5       | -1.00 | 9.76E-01 | 9.94E-01 | 5776.89  | not significant |
| 5958 | TAF6L        | -1.00 | 9.72E-01 | 9.92E-01 | 1004.91  | not significant |
| 5959 | ARID4A       | -1.00 | 9.81E-01 | 9.95E-01 | 1253.35  | not significant |
| 5960 | TREML2       | -1.00 | 9.80E-01 | 9.95E-01 | 1508.56  | not significant |
| 5961 | LOC100133331 | -1.00 | 9.48E-01 | NA       | 39.07    | not significant |
| 5962 | SPRED1       | -1.00 | 9.80E-01 | 9.95E-01 | 403.75   | not significant |
| 5963 | FBLN2        | -1.00 | 9.75E-01 | 9.93E-01 | 192.95   | not significant |
| 5964 | NPIP5B       | -1.00 | 9.74E-01 | 9.92E-01 | 125.30   | not significant |
| 5965 | NDRG4        | -1.00 | 9.55E-01 | NA       | 62.10    | not significant |
| 5966 | CERKL        | -1.00 | 8.77E-01 | NA       | 64.83    | not significant |
| 5967 | GMDS-AS1     | -1.00 | 9.54E-01 | NA       | 32.05    | not significant |
| 5968 | CDK14        | -1.00 | 9.07E-01 | NA       | 10.51    | not significant |
| 5969 | CPEB2        | -1.00 | 9.10E-01 | NA       | 9.55     | not significant |
| 5970 | SPARC        | -1.00 | 9.31E-01 | NA       | 14.09    | not significant |
| 5971 | TMEM26-AS1   | -1.00 | 2.06E-01 | 4.71E-01 | 532.72   | not significant |

|      |              |       |          |          |          |                 |
|------|--------------|-------|----------|----------|----------|-----------------|
| 5972 | LINC00337    | -1.00 | 9.15E-01 | NA       | 10.35    | not significant |
| 5973 | CDH2         | -1.00 | 9.26E-01 | NA       | 13.19    | not significant |
| 5974 | RARS2        | -1.00 | 9.88E-01 | 9.97E-01 | 787.00   | not significant |
| 5975 | ZNF891       | -1.00 | 9.76E-01 | 9.94E-01 | 194.80   | not significant |
| 5976 | MYO1F        | -1.00 | 9.73E-01 | NA       | 100.01   | not significant |
| 5977 | SLC35B1      | -1.00 | 9.82E-01 | 9.96E-01 | 1509.17  | not significant |
| 5978 | VEGFC        | -1.00 | 9.81E-01 | 9.95E-01 | 182.66   | not significant |
| 5979 | C5orf28      | -1.00 | 9.81E-01 | 9.95E-01 | 494.92   | not significant |
| 5980 | ENPP3        | -1.00 | 9.45E-01 | NA       | 20.71    | not significant |
| 5981 | RNF126       | -1.00 | 9.82E-01 | 9.96E-01 | 2648.85  | not significant |
| 5982 | PARD6B       | -1.00 | 9.76E-01 | 9.94E-01 | 134.71   | not significant |
| 5983 | DRP2         | -1.00 | 9.56E-01 | NA       | 69.59    | not significant |
| 5984 | MSRB1        | -1.00 | 9.86E-01 | 9.97E-01 | 378.65   | not significant |
| 5985 | NPAS1        | -1.00 | 9.58E-01 | NA       | 24.55    | not significant |
| 5986 | KDELC1       | -1.00 | 9.49E-01 | NA       | 13.82    | not significant |
| 5987 | ANTXRPL1     | -1.00 | 9.31E-01 | NA       | 9.43     | not significant |
| 5988 | SMARCA2      | -1.00 | 9.87E-01 | 9.97E-01 | 215.48   | not significant |
| 5989 | ARID1A       | -1.00 | 9.00E-01 | 9.62E-01 | 11078.59 | not significant |
| 5990 | TCEAL3       | -1.00 | 9.72E-01 | NA       | 47.16    | not significant |
| 5991 | TATDN1       | -1.00 | 9.99E-01 | 1.00E+00 | 587.27   | not significant |
| 5992 | LOC339803    | -1.00 | 9.79E-01 | 9.95E-01 | 194.68   | not significant |
| 5993 | PDAP1        | -1.00 | 9.84E-01 | 9.96E-01 | 5451.25  | not significant |
| 5994 | IPPK         | -1.00 | 9.84E-01 | 9.96E-01 | 402.87   | not significant |
| 5995 | SYNGR2       | -1.00 | 9.84E-01 | 9.96E-01 | 2544.12  | not significant |
| 5996 | AHCY         | -1.00 | 9.83E-01 | 9.96E-01 | 13710.44 | not significant |
| 5997 | CEP128       | -1.00 | 9.78E-01 | 9.95E-01 | 943.38   | not significant |
| 5998 | TBC1D32      | -1.00 | 9.84E-01 | 9.96E-01 | 249.36   | not significant |
| 5999 | NEK10        | -1.00 | 9.56E-01 | NA       | 25.23    | not significant |
| 6000 | USP35        | -1.00 | 9.83E-01 | 9.96E-01 | 288.38   | not significant |
| 6001 | ZNF252P-AS1  | -1.00 | 9.50E-01 | NA       | 10.32    | not significant |
| 6002 | ZNF322       | -1.00 | 9.75E-01 | NA       | 42.39    | not significant |
| 6003 | ZNF467       | -1.00 | 9.57E-01 | NA       | 14.40    | not significant |
| 6004 | FAM212A      | -1.00 | 9.82E-01 | NA       | 100.34   | not significant |
| 6005 | METTL20      | -1.00 | 9.51E-01 | NA       | 10.55    | not significant |
| 6006 | HIST1H4H     | -1.00 | 9.71E-01 | NA       | 42.68    | not significant |
| 6007 | MEA1         | -1.00 | 9.89E-01 | 9.97E-01 | 4047.06  | not significant |
| 6008 | TRAPPC3      | -1.00 | 9.90E-01 | 9.97E-01 | 1775.54  | not significant |
| 6009 | MAP1S        | -1.00 | 9.89E-01 | 9.97E-01 | 1713.41  | not significant |
| 6010 | PROCR        | -1.00 | 9.41E-01 | NA       | 9.78     | not significant |
| 6011 | FBXO21       | -1.00 | 9.88E-01 | 9.97E-01 | 2301.10  | not significant |
| 6012 | EP400NL      | -1.00 | 9.86E-01 | 9.97E-01 | 290.60   | not significant |
| 6013 | ABLIM2       | -1.00 | 9.41E-01 | NA       | 9.69     | not significant |
| 6014 | FNDC3A       | -1.00 | 9.87E-01 | 9.97E-01 | 2832.72  | not significant |
| 6015 | HCST         | -1.00 | 9.90E-01 | 9.97E-01 | 302.34   | not significant |
| 6016 | PNPLA7       | -1.00 | 9.79E-01 | NA       | 39.38    | not significant |
| 6017 | GPD1         | -1.00 | 9.59E-01 | NA       | 11.53    | not significant |
| 6018 | PDE9A        | -1.00 | 9.90E-01 | 9.97E-01 | 224.25   | not significant |
| 6019 | REG4         | -1.00 | 9.53E-01 | NA       | 9.91     | not significant |
| 6020 | MRPL27       | -1.00 | 9.90E-01 | 9.98E-01 | 988.68   | not significant |
| 6021 | NDUFB7       | -1.00 | 9.96E-01 | 1.00E+00 | 1941.45  | not significant |
| 6022 | HS3ST3B1     | -1.00 | 9.39E-01 | NA       | 13.19    | not significant |
| 6023 | CLTCL1       | -1.00 | 9.86E-01 | NA       | 52.65    | not significant |
| 6024 | THUMP2       | -1.00 | 9.92E-01 | 9.98E-01 | 712.36   | not significant |
| 6025 | FAM193A      | -1.00 | 9.92E-01 | 9.98E-01 | 1700.13  | not significant |
| 6026 | FCHO1        | -1.00 | 9.90E-01 | 9.98E-01 | 1479.75  | not significant |
| 6027 | MIAT         | -1.00 | 9.88E-01 | 9.97E-01 | 173.83   | not significant |
| 6028 | PCOLCE       | -1.00 | 8.63E-01 | NA       | 31.63    | not significant |
| 6029 | WDR66        | -1.00 | 9.74E-01 | NA       | 15.37    | not significant |
| 6030 | LINC00963    | -1.00 | 9.81E-01 | NA       | 16.08    | not significant |
| 6031 | DOC2A        | -1.00 | 9.88E-01 | NA       | 83.62    | not significant |
| 6032 | UNC93B1      | -1.00 | 9.76E-01 | NA       | 21.07    | not significant |
| 6033 | LOC102723703 | -1.00 | 9.47E-01 | NA       | 11.93    | not significant |
| 6034 | WFIKN1       | -1.00 | 9.86E-01 | NA       | 26.88    | not significant |
| 6035 | GNMT         | -1.00 | 9.75E-01 | NA       | 15.96    | not significant |
| 6036 | MCEMP1       | -1.00 | 9.76E-01 | NA       | 8.54     | not significant |
| 6037 | LINC00342    | -1.00 | 9.79E-01 | 9.95E-01 | 178.44   | not significant |
| 6038 | GPKOW        | -1.00 | 9.94E-01 | 1.00E+00 | 292.90   | not significant |
| 6039 | FAM195B      | -1.00 | 9.93E-01 | 9.99E-01 | 2060.28  | not significant |
| 6040 | TC2N         | -1.00 | 9.86E-01 | 9.97E-01 | 745.07   | not significant |
| 6041 | LINC00173    | -1.00 | 9.83E-01 | NA       | 21.97    | not significant |
| 6042 | DFNA5        | -1.00 | 9.65E-01 | NA       | 22.00    | not significant |
| 6043 | BNIP1        | -1.00 | 9.90E-01 | 9.98E-01 | 515.48   | not significant |
| 6044 | BLOC1S6      | -1.00 | 9.98E-01 | 1.00E+00 | 2960.70  | not significant |
| 6045 | XPO7         | -1.00 | 9.94E-01 | 9.99E-01 | 4177.96  | not significant |
| 6046 | DYNC1LI2     | -1.00 | 9.94E-01 | 9.99E-01 | 2180.71  | not significant |
| 6047 | SLC35A3      | -1.00 | 9.94E-01 | 1.00E+00 | 1293.15  | not significant |
| 6048 | ANKH         | -1.00 | 9.94E-01 | 9.99E-01 | 2269.11  | not significant |
| 6049 | ALDH8A1      | -1.00 | 9.83E-01 | NA       | 20.34    | not significant |
| 6050 | ZHX1-C8orf76 | -1.00 | 9.93E-01 | NA       | 26.28    | not significant |
| 6051 | ZNF771       | -1.00 | 9.96E-01 | 1.00E+00 | 154.11   | not significant |
| 6052 | LAMA3        | -1.00 | 9.86E-01 | NA       | 16.37    | not significant |
| 6053 | HIST1H4C     | -1.00 | 9.88E-01 | NA       | 23.63    | not significant |
| 6054 | ZNF793       | -1.00 | 9.79E-01 | NA       | 8.58     | not significant |
| 6055 | C8orf58      | -1.00 | 9.95E-01 | 1.00E+00 | 106.53   | not significant |
| 6056 | RABGGTA      | -1.00 | 9.98E-01 | 1.00E+00 | 689.77   | not significant |
| 6057 | RDX          | -1.00 | 9.93E-01 | NA       | 56.27    | not significant |
| 6058 | KTN1-AS1     | -1.00 | 9.91E-01 | NA       | 42.35    | not significant |
| 6059 | ANKRD31      | -1.00 | 9.90E-01 | NA       | 14.68    | not significant |



|      |              |       |          |          |          |                 |
|------|--------------|-------|----------|----------|----------|-----------------|
| 6060 | FAM104B      | -1.00 | 1.00E+00 | 1.00E+00 | 459.27   | not significant |
| 6061 | LINC00471    | -1.00 | 9.86E-01 | NA       | 17.29    | not significant |
| 6062 | GCAT         | -1.00 | 9.83E-01 | 9.96E-01 | 226.90   | not significant |
| 6063 | ETV2         | -1.00 | 9.92E-01 | NA       | 20.52    | not significant |
| 6064 | HAS3         | -1.00 | 9.93E-01 | NA       | 84.01    | not significant |
| 6065 | CHRNA3       | -1.00 | 9.91E-01 | NA       | 24.17    | not significant |
| 6066 | PTRPF        | -1.00 | 9.92E-01 | NA       | 37.95    | not significant |
| 6067 | ZNF844       | -1.00 | 9.76E-01 | NA       | 9.80     | not significant |
| 6068 | MIRGBP       | -1.00 | 9.96E-01 | 1.00E+00 | 1200.64  | not significant |
| 6069 | ZNF234       | -1.00 | 9.95E-01 | 1.00E+00 | 699.11   | not significant |
| 6070 | BOP1         | -1.00 | 9.99E-01 | 1.00E+00 | 633.33   | not significant |
| 6071 | IARS2        | -1.00 | 9.77E-01 | 9.94E-01 | 4371.44  | not significant |
| 6072 | DGKH         | -1.00 | 9.92E-01 | 9.98E-01 | 1323.14  | not significant |
| 6073 | RANBP10      | -1.00 | 9.96E-01 | 1.00E+00 | 1845.18  | not significant |
| 6074 | STAP2        | -1.00 | 9.80E-01 | NA       | 8.68     | not significant |
| 6075 | IL21R        | -1.00 | 9.97E-01 | 1.00E+00 | 290.03   | not significant |
| 6076 | ZNF773       | -1.00 | 9.94E-01 | 9.99E-01 | 251.86   | not significant |
| 6077 | ZFP30        | -1.00 | 9.95E-01 | 1.00E+00 | 761.70   | not significant |
| 6078 | GTSE1-AS1    | 1.00  | 1.00E+00 | NA       | 11.30    | not significant |
| 6079 | CTTN         | 1.00  | 9.97E-01 | NA       | 62.29    | not significant |
| 6080 | LOC100506123 | 1.00  | 9.98E-01 | NA       | 22.08    | not significant |
| 6081 | CYP4F35P     | 1.00  | 9.99E-01 | NA       | 12.90    | not significant |
| 6082 | FAM109A      | 1.00  | 9.98E-01 | 1.00E+00 | 189.39   | not significant |
| 6083 | NFKBIL1      | 1.00  | 9.99E-01 | NA       | 60.35    | not significant |
| 6084 | LOC100506548 | 1.00  | 9.88E-01 | 9.97E-01 | 913.39   | not significant |
| 6085 | TRIM23       | 1.00  | 9.92E-01 | 9.98E-01 | 482.13   | not significant |
| 6086 | EMR1         | 1.00  | 9.98E-01 | NA       | 15.23    | not significant |
| 6087 | DRAXIN       | 1.00  | 1.00E+00 | 1.00E+00 | 313.27   | not significant |
| 6088 | ATXN1        | 1.00  | 9.99E-01 | 1.00E+00 | 188.96   | not significant |
| 6089 | SLC10A3      | 1.00  | 9.95E-01 | NA       | 19.54    | not significant |
| 6090 | BRPF1        | 1.00  | 9.95E-01 | 1.00E+00 | 2921.33  | not significant |
| 6091 | STK36        | 1.00  | 9.98E-01 | 1.00E+00 | 276.74   | not significant |
| 6092 | NNT-AS1      | 1.00  | 9.97E-01 | 1.00E+00 | 572.97   | not significant |
| 6093 | ANKRD39      | 1.00  | 1.00E+00 | 1.00E+00 | 464.85   | not significant |
| 6094 | ZFPM2        | 1.00  | 9.98E-01 | NA       | 58.71    | not significant |
| 6095 | KRTCAP3      | 1.00  | 9.98E-01 | NA       | 14.27    | not significant |
| 6096 | PDZD4        | 1.00  | 9.99E-01 | NA       | 18.06    | not significant |
| 6097 | CITED4       | 1.00  | 9.98E-01 | NA       | 19.71    | not significant |
| 6098 | LMBRD2       | 1.00  | 9.99E-01 | 1.00E+00 | 680.57   | not significant |
| 6099 | TECPR2       | 1.00  | 9.98E-01 | 1.00E+00 | 658.36   | not significant |
| 6100 | C1orf145     | 1.00  | 1.00E+00 | NA       | 13.22    | not significant |
| 6101 | TRIM69       | 1.00  | 9.95E-01 | NA       | 17.42    | not significant |
| 6102 | TIRAP        | 1.00  | 9.93E-01 | NA       | 16.70    | not significant |
| 6103 | LOC100506746 | 1.00  | 9.91E-01 | NA       | 18.21    | not significant |
| 6104 | MORN1        | 1.00  | 9.96E-01 | NA       | 53.88    | not significant |
| 6105 | LCORL        | 1.00  | 1.00E+00 | 1.00E+00 | 691.71   | not significant |
| 6106 | CCDC81       | 1.00  | 9.97E-01 | NA       | 25.78    | not significant |
| 6107 | MRPL44       | 1.00  | 1.00E+00 | 1.00E+00 | 991.93   | not significant |
| 6108 | ZBTB3        | 1.00  | 9.97E-01 | 1.00E+00 | 162.84   | not significant |
| 6109 | MYL12B       | 1.00  | 9.98E-01 | 1.00E+00 | 8003.48  | not significant |
| 6110 | UBTD2        | 1.00  | 9.99E-01 | 1.00E+00 | 1099.70  | not significant |
| 6111 | FAM69B       | 1.00  | 9.99E-01 | 1.00E+00 | 227.83   | not significant |
| 6112 | ASPH         | 1.00  | 9.98E-01 | 1.00E+00 | 351.52   | not significant |
| 6113 | SLC52A2      | 1.00  | 9.96E-01 | 1.00E+00 | 268.56   | not significant |
| 6114 | HERC1        | 1.00  | 9.98E-01 | 1.00E+00 | 2162.76  | not significant |
| 6115 | GALNT2       | 1.00  | 9.98E-01 | 1.00E+00 | 9627.38  | not significant |
| 6116 | ABLIM1       | 1.00  | 9.99E-01 | 1.00E+00 | 3805.63  | not significant |
| 6117 | SLC12A9      | 1.00  | 1.00E+00 | 1.00E+00 | 768.77   | not significant |
| 6118 | ZRANB2-AS1   | 1.00  | 9.91E-01 | NA       | 21.29    | not significant |
| 6119 | C4orf29      | 1.00  | 9.84E-01 | 9.96E-01 | 634.54   | not significant |
| 6120 | NRXN2        | 1.00  | 9.96E-01 | 1.00E+00 | 617.95   | not significant |
| 6121 | REP15        | 1.00  | 9.90E-01 | NA       | 13.20    | not significant |
| 6122 | NAPSA        | 1.00  | 9.95E-01 | NA       | 14.96    | not significant |
| 6123 | ZNF528       | 1.00  | 9.98E-01 | 1.00E+00 | 125.06   | not significant |
| 6124 | SGSH         | 1.00  | 9.80E-01 | NA       | 16.10    | not significant |
| 6125 | HIC1         | 1.00  | 9.88E-01 | NA       | 69.47    | not significant |
| 6126 | FERMT2       | 1.00  | 9.85E-01 | NA       | 69.54    | not significant |
| 6127 | MGC12916     | 1.00  | 9.76E-01 | NA       | 14.14    | not significant |
| 6128 | GSKIP        | 1.00  | 9.94E-01 | 9.99E-01 | 1144.14  | not significant |
| 6129 | CHST1        | 1.00  | 9.91E-01 | NA       | 65.82    | not significant |
| 6130 | IQCH-AS1     | 1.00  | 9.94E-01 | 9.99E-01 | 185.49   | not significant |
| 6131 | AQP11        | 1.00  | 9.81E-01 | NA       | 15.36    | not significant |
| 6132 | ISCA1        | 1.00  | 9.96E-01 | 1.00E+00 | 771.65   | not significant |
| 6133 | PRDX2        | 1.00  | 9.98E-01 | 1.00E+00 | 4034.87  | not significant |
| 6134 | SLC16A3      | 1.00  | 9.89E-01 | 9.97E-01 | 392.42   | not significant |
| 6135 | NELFB        | 1.00  | 9.95E-01 | 1.00E+00 | 2195.19  | not significant |
| 6136 | CNOT6        | 1.00  | 9.82E-01 | 9.96E-01 | 10464.27 | not significant |
| 6137 | VAMP3        | 1.00  | 9.97E-01 | 1.00E+00 | 924.86   | not significant |
| 6138 | RMDN3        | 1.00  | 9.96E-01 | 1.00E+00 | 1480.37  | not significant |
| 6139 | ATAD5        | 1.00  | 9.95E-01 | 1.00E+00 | 2989.12  | not significant |
| 6140 | LRIQ2        | 1.00  | 9.96E-01 | 1.00E+00 | 678.69   | not significant |
| 6141 | REV1         | 1.00  | 9.96E-01 | 1.00E+00 | 1230.91  | not significant |
| 6142 | LINC00910    | 1.00  | 9.85E-01 | NA       | 23.66    | not significant |
| 6143 | PTCH2        | 1.00  | 9.83E-01 | NA       | 12.70    | not significant |
| 6144 | ZNF510       | 1.00  | 9.88E-01 | 9.97E-01 | 597.82   | not significant |
| 6145 | LOC100130992 | 1.00  | 9.84E-01 | NA       | 25.92    | not significant |
| 6146 | PTPRG        | 1.00  | 9.91E-01 | NA       | 83.69    | not significant |
| 6147 | CYP4F29P     | 1.00  | 5.06E-01 | NA       | 21.87    | not significant |

|      |              |      |          |          |         |                 |
|------|--------------|------|----------|----------|---------|-----------------|
| 6148 | ZNF561-AS1   | 1.00 | 9.85E-01 | 9.96E-01 | 102.23  | not significant |
| 6149 | KIAA1644     | 1.00 | 9.64E-01 | NA       | 11.05   | not significant |
| 6150 | PIGZ         | 1.00 | 9.80E-01 | NA       | 32.14   | not significant |
| 6151 | ABHD8        | 1.00 | 9.89E-01 | 9.97E-01 | 313.71  | not significant |
| 6152 | SDCCAG3      | 1.00 | 9.92E-01 | 9.98E-01 | 1176.87 | not significant |
| 6153 | GUK1         | 1.00 | 9.89E-01 | 9.97E-01 | 6184.00 | not significant |
| 6154 | CCDC102B     | 1.00 | 9.83E-01 | NA       | 55.09   | not significant |
| 6155 | MAN1B1-AS1   | 1.00 | 9.75E-01 | NA       | 28.02   | not significant |
| 6156 | FARS2        | 1.00 | 9.92E-01 | 9.98E-01 | 441.69  | not significant |
| 6157 | PTGER2       | 1.00 | 9.89E-01 | 9.97E-01 | 295.99  | not significant |
| 6158 | GUCY1A3      | 1.00 | 9.99E-01 | 1.00E+00 | 788.05  | not significant |
| 6159 | GAS2L1       | 1.00 | 9.90E-01 | 9.98E-01 | 430.75  | not significant |
| 6160 | FHDC1        | 1.00 | 9.56E-01 | NA       | 19.23   | not significant |
| 6161 | SLC26A2      | 1.00 | 9.92E-01 | 9.98E-01 | 1162.79 | not significant |
| 6162 | NBPF10       | 1.00 | 9.79E-01 | NA       | 46.91   | not significant |
| 6163 | TECTA        | 1.00 | 9.70E-01 | NA       | 13.15   | not significant |
| 6164 | ORAI1        | 1.00 | 9.97E-01 | NA       | 100.53  | not significant |
| 6165 | LOC100507530 | 1.00 | 9.68E-01 | NA       | 23.85   | not significant |
| 6166 | ASB12        | 1.00 | 9.66E-01 | NA       | 19.61   | not significant |
| 6167 | SUOX         | 1.00 | 9.64E-01 | NA       | 24.43   | not significant |
| 6168 | TOMM40L      | 1.00 | 9.89E-01 | 9.97E-01 | 1136.62 | not significant |
| 6169 | CREG1        | 1.00 | 9.89E-01 | 9.97E-01 | 1072.59 | not significant |
| 6170 | WTAP         | 1.00 | 9.89E-01 | 9.97E-01 | 4134.84 | not significant |
| 6171 | SCAND2P      | 1.00 | 9.88E-01 | 9.97E-01 | 156.98  | not significant |
| 6172 | MOCS1        | 1.00 | 9.90E-01 | 9.97E-01 | 1080.98 | not significant |
| 6173 | SETD9        | 1.00 | 9.82E-01 | 9.96E-01 | 110.05  | not significant |
| 6174 | TFIP11       | 1.00 | 9.90E-01 | 9.98E-01 | 2024.77 | not significant |
| 6175 | PPP2R1A      | 1.00 | 9.65E-01 | 9.89E-01 | 7515.37 | not significant |
| 6176 | COQ10A       | 1.00 | 9.88E-01 | 9.97E-01 | 465.02  | not significant |
| 6177 | RAB9A        | 1.00 | 9.88E-01 | 9.97E-01 | 356.81  | not significant |
| 6178 | COPB1        | 1.00 | 1.00E+00 | 1.00E+00 | 6908.24 | not significant |
| 6179 | SMG5         | 1.00 | 9.87E-01 | 9.97E-01 | 6381.56 | not significant |
| 6180 | PUS10        | 1.00 | 9.87E-01 | 9.97E-01 | 422.93  | not significant |
| 6181 | TMEM248      | 1.00 | 9.84E-01 | 9.96E-01 | 5906.73 | not significant |
| 6182 | ZC3H12A      | 1.00 | 9.91E-01 | 9.98E-01 | 258.40  | not significant |
| 6183 | RPRD2        | 1.00 | 9.97E-01 | 1.00E+00 | 2243.89 | not significant |
| 6184 | WASH7P       | 1.00 | 9.67E-01 | NA       | 29.83   | not significant |
| 6185 | SPSB2        | 1.00 | 9.52E-01 | NA       | 15.04   | not significant |
| 6186 | TREML1       | 1.00 | 9.73E-01 | NA       | 49.93   | not significant |
| 6187 | ARHGEF39     | 1.00 | 9.86E-01 | 9.97E-01 | 269.15  | not significant |
| 6188 | NUDCD3       | 1.00 | 9.85E-01 | 9.97E-01 | 2534.44 | not significant |
| 6189 | FOXRED1      | 1.00 | 9.86E-01 | 9.97E-01 | 1448.75 | not significant |
| 6190 | RASSF3       | 1.00 | 9.86E-01 | 9.97E-01 | 1804.11 | not significant |
| 6191 | GAS8         | 1.00 | 9.63E-01 | NA       | 27.44   | not significant |
| 6192 | FAM210A      | 1.00 | 9.86E-01 | 9.97E-01 | 1310.35 | not significant |
| 6193 | LOC100506804 | 1.00 | 9.44E-01 | NA       | 12.14   | not significant |
| 6194 | CFH          | 1.00 | 9.84E-01 | 9.96E-01 | 395.52  | not significant |
| 6195 | CYBRD1       | 1.00 | 9.84E-01 | 9.96E-01 | 438.70  | not significant |
| 6196 | ST7L         | 1.00 | 9.83E-01 | 9.96E-01 | 381.97  | not significant |
| 6197 | CCDC53       | 1.00 | 9.81E-01 | 9.95E-01 | 577.55  | not significant |
| 6198 | TIGD1        | 1.00 | 9.67E-01 | 9.90E-01 | 251.21  | not significant |
| 6199 | FREM1        | 1.00 | 9.51E-01 | NA       | 22.05   | not significant |
| 6200 | TMEM128      | 1.00 | 9.77E-01 | 9.94E-01 | 569.69  | not significant |
| 6201 | NCF2         | 1.00 | 9.49E-01 | NA       | 24.03   | not significant |
| 6202 | GNPAT        | 1.00 | 9.85E-01 | 9.96E-01 | 2322.18 | not significant |
| 6203 | ELP6         | 1.00 | 9.83E-01 | 9.96E-01 | 1691.53 | not significant |
| 6204 | PIGU         | 1.00 | 9.83E-01 | 9.96E-01 | 1843.33 | not significant |
| 6205 | FAM122B      | 1.00 | 9.81E-01 | 9.95E-01 | 4477.41 | not significant |
| 6206 | LOC101927365 | 1.00 | 9.75E-01 | NA       | 92.74   | not significant |
| 6207 | CHPF         | 1.00 | 9.76E-01 | 9.94E-01 | 121.58  | not significant |
| 6208 | DZIP1        | 1.00 | 9.85E-01 | 9.96E-01 | 446.19  | not significant |
| 6209 | MIS18BP1     | 1.00 | 9.82E-01 | 9.96E-01 | 1861.54 | not significant |
| 6210 | SSSCA1-AS1   | 1.00 | 9.34E-01 | NA       | 14.62   | not significant |
| 6211 | USP46-AS1    | 1.00 | 9.32E-01 | NA       | 13.26   | not significant |
| 6212 | CDCP1        | 1.00 | 9.23E-01 | NA       | 12.55   | not significant |
| 6213 | ALOX15P1     | 1.00 | 9.41E-01 | NA       | 17.19   | not significant |
| 6214 | CREB3L1      | 1.00 | 9.65E-01 | NA       | 61.39   | not significant |
| 6215 | PRMT5-AS1    | 1.00 | 9.11E-01 | NA       | 10.39   | not significant |
| 6216 | CERS6-AS1    | 1.00 | 9.03E-01 | NA       | 41.72   | not significant |
| 6217 | AURKC        | 1.00 | 9.21E-01 | NA       | 14.23   | not significant |
| 6218 | LRRC38       | 1.00 | 9.32E-01 | NA       | 15.47   | not significant |
| 6219 | LFNG         | 1.00 | 9.91E-01 | 9.98E-01 | 269.46  | not significant |
| 6220 | C9orf43      | 1.00 | 9.21E-01 | NA       | 11.98   | not significant |
| 6221 | ACSS2        | 1.00 | 9.70E-01 | 9.92E-01 | 280.19  | not significant |
| 6222 | HIST1H2BB    | 1.00 | 9.12E-01 | NA       | 11.69   | not significant |
| 6223 | GEMIN8P4     | 1.00 | 9.69E-01 | NA       | 90.41   | not significant |
| 6224 | GPN2         | 1.00 | 9.87E-01 | 9.97E-01 | 779.25  | not significant |
| 6225 | ATP6AP2      | 1.00 | 9.92E-01 | 9.98E-01 | 2624.59 | not significant |
| 6226 | ZNF282       | 1.00 | 9.82E-01 | 9.96E-01 | 2003.82 | not significant |
| 6227 | RB1CC1       | 1.00 | 9.80E-01 | 9.95E-01 | 2618.53 | not significant |
| 6228 | CLASP1       | 1.00 | 9.81E-01 | 9.95E-01 | 3141.29 | not significant |
| 6229 | KCNH1        | 1.00 | 9.29E-01 | NA       | 16.42   | not significant |
| 6230 | SEMA4B       | 1.00 | 9.80E-01 | 9.95E-01 | 335.72  | not significant |
| 6231 | DIS3L2       | 1.00 | 9.81E-01 | 9.95E-01 | 1273.52 | not significant |
| 6232 | RAB40B       | 1.00 | 9.46E-01 | NA       | 26.95   | not significant |
| 6233 | ZNF2         | 1.00 | 9.73E-01 | 9.92E-01 | 251.12  | not significant |
| 6234 | ITGA7        | 1.00 | 9.50E-01 | NA       | 30.72   | not significant |
| 6235 | ADAMTSL5     | 1.00 | 9.52E-01 | NA       | 36.42   | not significant |

|      |              |      |          |          |          |                 |
|------|--------------|------|----------|----------|----------|-----------------|
| 6236 | CCDC30       | 1.00 | 9.00E-01 | NA       | 9.11     | not significant |
| 6237 | ADAMTS7P1    | 1.00 | 8.97E-01 | NA       | 8.77     | not significant |
| 6238 | RPL19P12     | 1.00 | 9.65E-01 | NA       | 88.65    | not significant |
| 6239 | C21orf67     | 1.00 | 9.67E-01 | 9.90E-01 | 141.58   | not significant |
| 6240 | CCDC13       | 1.00 | 9.19E-01 | NA       | 14.67    | not significant |
| 6241 | FAM167A      | 1.00 | 9.37E-01 | NA       | 25.74    | not significant |
| 6242 | DICER1-AS1   | 1.00 | 9.28E-01 | NA       | 19.40    | not significant |
| 6243 | LOC654342    | 1.00 | 9.64E-01 | NA       | 92.36    | not significant |
| 6244 | MND1         | 1.00 | 9.71E-01 | 9.92E-01 | 856.36   | not significant |
| 6245 | MFAP2        | 1.00 | 9.11E-01 | NA       | 11.54    | not significant |
| 6246 | BLVRB        | 1.00 | 9.61E-01 | NA       | 85.14    | not significant |
| 6247 | R3HCC1       | 1.00 | 9.77E-01 | 9.94E-01 | 1597.55  | not significant |
| 6248 | PIFO         | 1.00 | 9.22E-01 | NA       | 17.16    | not significant |
| 6249 | PIWIL4       | 1.00 | 9.59E-01 | NA       | 65.83    | not significant |
| 6250 | PCNP         | 1.00 | 9.73E-01 | 9.92E-01 | 5699.94  | not significant |
| 6251 | EID2         | 1.00 | 9.79E-01 | 9.95E-01 | 715.24   | not significant |
| 6252 | STAR5        | 1.00 | 9.63E-01 | NA       | 77.07    | not significant |
| 6253 | FXR1         | 1.00 | 9.73E-01 | 9.92E-01 | 4434.51  | not significant |
| 6254 | TARP         | 1.00 | 9.83E-01 | 9.96E-01 | 734.50   | not significant |
| 6255 | AMPD3        | 1.00 | 9.78E-01 | 9.95E-01 | 1724.37  | not significant |
| 6256 | IFI30        | 1.00 | 9.77E-01 | 9.94E-01 | 1157.84  | not significant |
| 6257 | SAMD13       | 1.00 | 9.56E-01 | NA       | 60.68    | not significant |
| 6258 | MST1P2       | 1.00 | 9.09E-01 | NA       | 13.81    | not significant |
| 6259 | ZXDB         | 1.00 | 9.84E-01 | 9.96E-01 | 375.27   | not significant |
| 6260 | ITGB7        | 1.00 | 9.72E-01 | 9.92E-01 | 309.30   | not significant |
| 6261 | USP43        | 1.00 | 9.41E-01 | NA       | 29.41    | not significant |
| 6262 | MST1R        | 1.00 | 9.56E-01 | NA       | 53.28    | not significant |
| 6263 | SPATA20      | 1.00 | 9.51E-01 | NA       | 44.51    | not significant |
| 6264 | ZNF620       | 1.00 | 8.92E-01 | NA       | 19.62    | not significant |
| 6265 | TMEM44-AS1   | 1.00 | 9.29E-01 | NA       | 28.21    | not significant |
| 6266 | IFITM2       | 1.00 | 9.19E-01 | NA       | 20.18    | not significant |
| 6267 | TFPT         | 1.00 | 9.73E-01 | 9.92E-01 | 329.35   | not significant |
| 6268 | KIFC3        | 1.00 | 9.64E-01 | NA       | 46.37    | not significant |
| 6269 | SSBP2        | 1.00 | 9.74E-01 | 9.93E-01 | 1185.86  | not significant |
| 6270 | ADO          | 1.00 | 9.76E-01 | 9.93E-01 | 1639.51  | not significant |
| 6271 | RTKN         | 1.00 | 8.73E-01 | NA       | 8.53     | not significant |
| 6272 | STT3A        | 1.00 | 9.73E-01 | 9.92E-01 | 7055.13  | not significant |
| 6273 | KIAA0930     | 1.00 | 9.95E-01 | 1.00E+00 | 2729.04  | not significant |
| 6274 | CLEC4A       | 1.00 | 9.06E-01 | NA       | 13.83    | not significant |
| 6275 | VIM-AS1      | 1.00 | 9.59E-01 | 9.86E-01 | 366.90   | not significant |
| 6276 | RPL23AP82    | 1.00 | 9.31E-01 | NA       | 32.82    | not significant |
| 6277 | SLC6A16      | 1.00 | 9.32E-01 | NA       | 29.45    | not significant |
| 6278 | FKBP1B       | 1.00 | 8.81E-01 | NA       | 9.66     | not significant |
| 6279 | AUH          | 1.00 | 9.65E-01 | 9.89E-01 | 224.14   | not significant |
| 6280 | LOC100507501 | 1.00 | 9.38E-01 | NA       | 36.30    | not significant |
| 6281 | FBXO6        | 1.00 | 9.65E-01 | 9.89E-01 | 232.40   | not significant |
| 6282 | DYNLT1       | 1.00 | 9.67E-01 | 9.90E-01 | 389.44   | not significant |
| 6283 | PRICKLE4     | 1.00 | 9.49E-01 | NA       | 83.85    | not significant |
| 6284 | TNIP2        | 1.00 | 9.72E-01 | 9.92E-01 | 1311.15  | not significant |
| 6285 | PLAA         | 1.00 | 9.72E-01 | 9.92E-01 | 2239.21  | not significant |
| 6286 | MOSPD3       | 1.00 | 9.69E-01 | 9.91E-01 | 393.37   | not significant |
| 6287 | DUS1L        | 1.00 | 9.89E-01 | 9.97E-01 | 5558.68  | not significant |
| 6288 | FAM213B      | 1.00 | 9.71E-01 | 9.92E-01 | 1295.43  | not significant |
| 6289 | FAM45B       | 1.00 | 9.63E-01 | 9.88E-01 | 188.78   | not significant |
| 6290 | CLPTM1L      | 1.00 | 9.73E-01 | 9.92E-01 | 7185.01  | not significant |
| 6291 | NLRP14       | 1.00 | 9.43E-01 | NA       | 62.03    | not significant |
| 6292 | MMP14        | 1.00 | 9.36E-01 | NA       | 42.11    | not significant |
| 6293 | CEP95        | 1.00 | 9.75E-01 | 9.93E-01 | 956.39   | not significant |
| 6294 | LOC728323    | 1.00 | 9.72E-01 | NA       | 30.76    | not significant |
| 6295 | REEP5        | 1.00 | 9.49E-01 | 9.80E-01 | 1707.36  | not significant |
| 6296 | CCZ1         | 1.00 | 9.53E-01 | 9.82E-01 | 109.19   | not significant |
| 6297 | KIAA0226     | 1.00 | 9.73E-01 | 9.92E-01 | 1459.36  | not significant |
| 6298 | DPF3         | 1.00 | 9.76E-01 | 9.94E-01 | 992.69   | not significant |
| 6299 | JADE1        | 1.00 | 9.72E-01 | 9.92E-01 | 2382.29  | not significant |
| 6300 | PDE3B        | 1.00 | 9.38E-01 | NA       | 49.77    | not significant |
| 6301 | AGPAT1       | 1.00 | 9.65E-01 | 9.89E-01 | 274.80   | not significant |
| 6302 | GALNT3       | 1.00 | 9.11E-01 | NA       | 25.07    | not significant |
| 6303 | ROM1         | 1.00 | 8.80E-01 | NA       | 14.99    | not significant |
| 6304 | FAM132B      | 1.00 | 9.02E-01 | NA       | 20.63    | not significant |
| 6305 | EAF2         | 1.00 | 9.50E-01 | NA       | 90.40    | not significant |
| 6306 | MIF          | 1.00 | 9.90E-01 | 9.98E-01 | 19406.24 | not significant |
| 6307 | C14orf169    | 1.00 | 9.71E-01 | 9.92E-01 | 1315.25  | not significant |
| 6308 | FAM118A      | 1.00 | 9.69E-01 | 9.91E-01 | 843.11   | not significant |
| 6309 | EXOSC2       | 1.00 | 9.70E-01 | 9.91E-01 | 1643.20  | not significant |
| 6310 | DENND1B      | 1.00 | 9.71E-01 | 9.92E-01 | 3519.01  | not significant |
| 6311 | C17orf85     | 1.00 | 9.80E-01 | 9.95E-01 | 3867.32  | not significant |
| 6312 | RAB31        | 1.00 | 9.00E-01 | NA       | 20.17    | not significant |
| 6313 | PYROXD1      | 1.00 | 9.52E-01 | 9.82E-01 | 493.02   | not significant |
| 6314 | FAM66C       | 1.00 | 8.60E-01 | NA       | 10.75    | not significant |
| 6315 | ZNF425       | 1.00 | 9.45E-01 | NA       | 81.71    | not significant |
| 6316 | GGT1         | 1.00 | 9.53E-01 | 9.82E-01 | 484.70   | not significant |
| 6317 | HSF2BP       | 1.00 | 8.95E-01 | NA       | 23.96    | not significant |
| 6318 | DUS3L        | 1.00 | 9.74E-01 | 9.92E-01 | 2539.39  | not significant |
| 6319 | ARPC5        | 1.00 | 9.63E-01 | 9.88E-01 | 6954.91  | not significant |
| 6320 | JADE2        | 1.00 | 9.63E-01 | 9.88E-01 | 4128.93  | not significant |
| 6321 | PCDHGB2      | 1.00 | 9.08E-01 | NA       | 32.30    | not significant |
| 6322 | USP25        | 1.00 | 9.66E-01 | 9.90E-01 | 2262.17  | not significant |
| 6323 | FYB          | 1.00 | 9.66E-01 | 9.89E-01 | 2845.02  | not significant |

|      |              |      |          |          |          |                 |
|------|--------------|------|----------|----------|----------|-----------------|
| 6324 | PLAG1        | 1.00 | 9.18E-01 | NA       | 36.40    | not significant |
| 6325 | LZTS3        | 1.00 | 8.31E-01 | NA       | 9.62     | not significant |
| 6326 | PPP1R2P3     | 1.00 | 8.79E-01 | NA       | 17.23    | not significant |
| 6327 | MIR503HG     | 1.00 | 8.56E-01 | NA       | 13.48    | not significant |
| 6328 | DLX1         | 1.00 | 8.94E-01 | NA       | 19.44    | not significant |
| 6329 | PAXBP1-AS1   | 1.00 | 8.80E-01 | NA       | 16.14    | not significant |
| 6330 | CATSPER2P1   | 1.00 | 8.70E-01 | NA       | 13.62    | not significant |
| 6331 | AKR7A3       | 1.00 | 8.58E-01 | NA       | 12.10    | not significant |
| 6332 | CTH          | 1.00 | 8.51E-01 | NA       | 11.72    | not significant |
| 6333 | ADM          | 1.00 | 8.37E-01 | NA       | 9.97     | not significant |
| 6334 | ZFAND2A      | 1.00 | 9.50E-01 | 9.81E-01 | 265.36   | not significant |
| 6335 | MCAT         | 1.00 | 9.64E-01 | 9.88E-01 | 744.67   | not significant |
| 6336 | PSMB9        | 1.00 | 9.64E-01 | 9.89E-01 | 932.76   | not significant |
| 6337 | DGCR6L       | 1.00 | 9.63E-01 | 9.88E-01 | 743.03   | not significant |
| 6338 | RGS19        | 1.00 | 9.63E-01 | 9.88E-01 | 1391.52  | not significant |
| 6339 | CETN4P       | 1.00 | 8.25E-01 | NA       | 10.61    | not significant |
| 6340 | FBXO33       | 1.00 | 9.62E-01 | 9.88E-01 | 1482.83  | not significant |
| 6341 | SRP68        | 1.00 | 9.57E-01 | 9.84E-01 | 6435.72  | not significant |
| 6342 | RAC3         | 1.00 | 9.58E-01 | 9.85E-01 | 305.86   | not significant |
| 6343 | ZSCAN31      | 1.00 | 9.16E-01 | NA       | 39.29    | not significant |
| 6344 | LINC00672    | 1.00 | 9.09E-01 | NA       | 34.57    | not significant |
| 6345 | C1orf27      | 1.00 | 9.69E-01 | 9.91E-01 | 892.74   | not significant |
| 6346 | DNAJB14      | 1.00 | 9.63E-01 | 9.88E-01 | 2694.08  | not significant |
| 6347 | GPR35        | 1.00 | 8.82E-01 | NA       | 24.41    | not significant |
| 6348 | C1orf53      | 1.00 | 9.16E-01 | NA       | 45.01    | not significant |
| 6349 | GTF2H2       | 1.00 | 9.31E-01 | NA       | 68.89    | not significant |
| 6350 | GEMIN2       | 1.00 | 9.62E-01 | 9.88E-01 | 528.56   | not significant |
| 6351 | TCTEX1D2     | 1.00 | 9.44E-01 | 9.79E-01 | 167.30   | not significant |
| 6352 | ACY1         | 1.00 | 8.57E-01 | NA       | 17.52    | not significant |
| 6353 | BCL2L14      | 1.00 | 9.06E-01 | NA       | 39.02    | not significant |
| 6354 | FGFR1        | 1.00 | 9.45E-01 | 9.79E-01 | 136.36   | not significant |
| 6355 | LOC102724297 | 1.00 | 8.29E-01 | NA       | 11.52    | not significant |
| 6356 | GLIS2        | 1.00 | 8.57E-01 | NA       | 19.81    | not significant |
| 6357 | DNAJB4       | 1.00 | 9.65E-01 | 9.89E-01 | 236.18   | not significant |
| 6358 | VTI1B        | 1.00 | 9.61E-01 | 9.87E-01 | 1990.27  | not significant |
| 6359 | MYSM1        | 1.00 | 9.62E-01 | 9.88E-01 | 1718.05  | not significant |
| 6360 | PBLD         | 1.00 | 9.13E-01 | NA       | 46.76    | not significant |
| 6361 | H2AFY2       | 1.00 | 8.46E-01 | NA       | 14.40    | not significant |
| 6362 | HYKK         | 1.00 | 8.64E-01 | NA       | 20.40    | not significant |
| 6363 | NRSN2-AS1    | 1.00 | 8.75E-01 | NA       | 21.62    | not significant |
| 6364 | NBPF15       | 1.00 | 8.60E-01 | NA       | 18.46    | not significant |
| 6365 | CLIP2        | 1.00 | 8.95E-01 | NA       | 28.10    | not significant |
| 6366 | ATP13A4      | 1.00 | 8.60E-01 | NA       | 17.40    | not significant |
| 6367 | APP          | 1.00 | 9.10E-01 | NA       | 43.28    | not significant |
| 6368 | 43532_13639  | 1.00 | 9.43E-01 | 9.79E-01 | 145.69   | not significant |
| 6369 | HIST1H4D     | 1.00 | 7.96E-01 | NA       | 10.19    | not significant |
| 6370 | HIST1H2BE    | 1.00 | 9.90E-01 | NA       | 31.14    | not significant |
| 6371 | ZNF833P      | 1.00 | 8.96E-01 | NA       | 35.77    | not significant |
| 6372 | C20orf197    | 1.00 | 9.43E-01 | 9.79E-01 | 163.87   | not significant |
| 6373 | C1orf101     | 1.00 | 8.22E-01 | NA       | 12.06    | not significant |
| 6374 | LOC729970    | 1.00 | 8.23E-01 | NA       | 11.01    | not significant |
| 6375 | IMMP1L       | 1.00 | 9.42E-01 | 9.79E-01 | 559.27   | not significant |
| 6376 | BRF1         | 1.00 | 9.58E-01 | 9.85E-01 | 1485.66  | not significant |
| 6377 | RCC2         | 1.00 | 9.50E-01 | 9.81E-01 | 15394.01 | not significant |
| 6378 | PTOV1-AS1    | 1.00 | 7.91E-01 | NA       | 9.80     | not significant |
| 6379 | FAM161A      | 1.00 | 9.54E-01 | 9.83E-01 | 426.22   | not significant |
| 6380 | ISY1         | 1.00 | 9.60E-01 | 9.87E-01 | 952.39   | not significant |
| 6381 | AASDH        | 1.00 | 9.54E-01 | 9.83E-01 | 481.87   | not significant |
| 6382 | C3orf35      | 1.00 | 7.89E-01 | NA       | 9.34     | not significant |
| 6383 | ABHD13       | 1.00 | 9.57E-01 | 9.85E-01 | 1512.82  | not significant |
| 6384 | ZNF35        | 1.00 | 8.52E-01 | NA       | 16.49    | not significant |
| 6385 | FAM129C      | 1.00 | 9.29E-01 | NA       | 80.76    | not significant |
| 6386 | STX18-AS1    | 1.00 | 8.71E-01 | NA       | 88.53    | not significant |
| 6387 | BRAF         | 1.00 | 9.81E-01 | 9.95E-01 | 366.22   | not significant |
| 6388 | RP2          | 1.00 | 9.31E-01 | NA       | 92.29    | not significant |
| 6389 | PI16         | 1.00 | 9.02E-01 | NA       | 40.59    | not significant |
| 6390 | C8orf44      | 1.00 | 9.06E-01 | NA       | 46.03    | not significant |
| 6391 | PSPN         | 1.00 | 8.27E-01 | NA       | 13.15    | not significant |
| 6392 | RAB3B        | 1.00 | 8.44E-01 | NA       | 17.66    | not significant |
| 6393 | TRIM47       | 1.00 | 9.12E-01 | NA       | 50.92    | not significant |
| 6394 | SERHL        | 1.00 | 8.08E-01 | NA       | 12.14    | not significant |
| 6395 | COQ10B       | 1.00 | 9.57E-01 | 9.84E-01 | 815.57   | not significant |
| 6396 | SSR1         | 1.00 | 9.49E-01 | 9.80E-01 | 9230.09  | not significant |
| 6397 | DYNC1H1      | 1.00 | 9.43E-01 | 9.79E-01 | 11183.34 | not significant |
| 6398 | LIMK2        | 1.00 | 9.34E-01 | 9.75E-01 | 1763.78  | not significant |
| 6399 | SHPRH        | 1.00 | 9.81E-01 | 9.95E-01 | 2543.51  | not significant |
| 6400 | ZNF652       | 1.00 | 9.73E-01 | 9.92E-01 | 346.00   | not significant |
| 6401 | UVSSA        | 1.00 | 9.53E-01 | 9.82E-01 | 485.26   | not significant |
| 6402 | LOC100130987 | 1.00 | 8.25E-01 | NA       | 15.00    | not significant |
| 6403 | APOE         | 1.00 | 8.08E-01 | NA       | 12.35    | not significant |
| 6404 | LOC100506127 | 1.00 | 9.24E-01 | NA       | 85.60    | not significant |
| 6405 | YTHDF3-AS1   | 1.00 | 8.41E-01 | NA       | 17.18    | not significant |
| 6406 | NPEPL1       | 1.00 | 7.69E-01 | NA       | 8.52     | not significant |
| 6407 | SGK223       | 1.00 | 9.19E-01 | NA       | 62.92    | not significant |
| 6408 | STAG3L1      | 1.00 | 9.15E-01 | NA       | 49.89    | not significant |
| 6409 | HGH1         | 1.00 | 8.92E-01 | NA       | 46.82    | not significant |
| 6410 | XCL1         | 1.00 | 7.87E-01 | NA       | 9.81     | not significant |
| 6411 | PLEKHG5      | 1.00 | 8.94E-01 | NA       | 46.30    | not significant |

|      |              |      |          |          |         |                 |
|------|--------------|------|----------|----------|---------|-----------------|
| 6412 | TUT1         | 1.00 | 9.52E-01 | 9.82E-01 | 744.56  | not significant |
| 6413 | C17orf100    | 1.00 | 8.67E-01 | NA       | 28.16   | not significant |
| 6414 | C18orf54     | 1.00 | 9.34E-01 | 9.75E-01 | 557.94  | not significant |
| 6415 | PSD          | 1.00 | 8.56E-01 | NA       | 24.58   | not significant |
| 6416 | TMEM222      | 1.00 | 9.52E-01 | 9.82E-01 | 1196.29 | not significant |
| 6417 | MTBP         | 1.00 | 9.69E-01 | 9.91E-01 | 1067.76 | not significant |
| 6418 | SLC26A11     | 1.00 | 7.92E-01 | NA       | 11.08   | not significant |
| 6419 | WDR62        | 1.00 | 9.88E-01 | 9.97E-01 | 3554.88 | not significant |
| 6420 | ESCO2        | 1.00 | 9.52E-01 | 9.82E-01 | 2328.89 | not significant |
| 6421 | CBFA2T3      | 1.00 | 9.39E-01 | 9.78E-01 | 8520.25 | not significant |
| 6422 | C22orf46     | 1.00 | 9.53E-01 | 9.82E-01 | 681.69  | not significant |
| 6423 | PATL1        | 1.00 | 9.47E-01 | 9.79E-01 | 3646.81 | not significant |
| 6424 | OSER1-AS1    | 1.00 | 8.58E-01 | NA       | 22.42   | not significant |
| 6425 | LRRIQ3       | 1.00 | 8.43E-01 | NA       | 18.99   | not significant |
| 6426 | RNF115       | 1.00 | 9.48E-01 | 9.80E-01 | 396.83  | not significant |
| 6427 | NOP14-AS1    | 1.00 | 9.43E-01 | 9.79E-01 | 214.42  | not significant |
| 6428 | LRRC24       | 1.00 | 8.94E-01 | NA       | 50.61   | not significant |
| 6429 | C15orf52     | 1.00 | 7.78E-01 | NA       | 11.00   | not significant |
| 6430 | RNF150       | 1.00 | 9.40E-01 | 9.78E-01 | 285.93  | not significant |
| 6431 | TMEM63C      | 1.00 | 7.84E-01 | NA       | 10.40   | not significant |
| 6432 | SCLY         | 1.00 | 7.45E-01 | NA       | 8.85    | not significant |
| 6433 | OSGIN1       | 1.00 | 8.25E-01 | NA       | 15.22   | not significant |
| 6434 | STXBP5L      | 1.00 | 8.73E-01 | NA       | 34.19   | not significant |
| 6435 | TMEM25       | 1.00 | 8.36E-01 | NA       | 20.66   | not significant |
| 6436 | LOC101928784 | 1.00 | 7.88E-01 | NA       | 11.87   | not significant |
| 6437 | USE1         | 1.00 | 9.44E-01 | 9.79E-01 | 406.60  | not significant |
| 6438 | MTFP1        | 1.00 | 9.48E-01 | 9.80E-01 | 2777.82 | not significant |
| 6439 | C1orf216     | 1.00 | 9.58E-01 | 9.85E-01 | 719.22  | not significant |
| 6440 | PTGES3L      | 1.00 | 8.03E-01 | NA       | 14.55   | not significant |
| 6441 | DLG1         | 1.00 | 9.50E-01 | 9.81E-01 | 2966.98 | not significant |
| 6442 | MAPK14       | 1.00 | 9.44E-01 | 9.79E-01 | 4022.13 | not significant |
| 6443 | PXK          | 1.00 | 9.45E-01 | 9.79E-01 | 3085.99 | not significant |
| 6444 | PPP1CB       | 1.00 | 9.20E-01 | 9.69E-01 | 7180.74 | not significant |
| 6445 | ACVR2B-AS1   | 1.00 | 7.87E-01 | NA       | 12.88   | not significant |
| 6446 | ZGLP1        | 1.00 | 9.07E-01 | NA       | 73.24   | not significant |
| 6447 | EP400        | 1.00 | 9.35E-01 | 9.75E-01 | 6282.40 | not significant |
| 6448 | ALPK1        | 1.00 | 9.40E-01 | 9.78E-01 | 229.66  | not significant |
| 6449 | BLZF1        | 1.00 | 9.30E-01 | 9.74E-01 | 537.31  | not significant |
| 6450 | ASIC3        | 1.00 | 8.86E-01 | NA       | 40.84   | not significant |
| 6451 | PCDH9        | 1.00 | 8.93E-01 | NA       | 50.47   | not significant |
| 6452 | ZNF576       | 1.00 | 9.49E-01 | 9.80E-01 | 461.77  | not significant |
| 6453 | NBPF12       | 1.00 | 8.50E-01 | NA       | 29.01   | not significant |
| 6454 | CMYA5        | 1.00 | 8.81E-01 | NA       | 41.26   | not significant |
| 6455 | EFCAB7       | 1.00 | 9.44E-01 | 9.79E-01 | 361.13  | not significant |
| 6456 | UBAC2-AS1    | 1.00 | 8.57E-01 | NA       | 32.62   | not significant |
| 6457 | TTC23        | 1.00 | 8.71E-01 | NA       | 36.69   | not significant |
| 6458 | ENGASE       | 1.00 | 8.16E-01 | NA       | 17.45   | not significant |
| 6459 | LRRC29       | 1.00 | 7.98E-01 | NA       | 13.10   | not significant |
| 6460 | FAM86JP      | 1.00 | 8.88E-01 | NA       | 50.43   | not significant |
| 6461 | SLC25A11     | 1.00 | 9.49E-01 | 9.80E-01 | 2220.99 | not significant |
| 6462 | SUCLG2       | 1.00 | 9.47E-01 | 9.79E-01 | 1312.25 | not significant |
| 6463 | APOLD1       | 1.00 | 9.02E-01 | NA       | 71.59   | not significant |
| 6464 | SH3BP2       | 1.00 | 9.25E-01 | 9.72E-01 | 1810.14 | not significant |
| 6465 | ICOS         | 1.00 | 9.42E-01 | 9.79E-01 | 6396.73 | not significant |
| 6466 | PSMA8        | 1.00 | 9.35E-01 | 9.75E-01 | 330.75  | not significant |
| 6467 | PLEC         | 1.00 | 9.30E-01 | 9.74E-01 | 209.50  | not significant |
| 6468 | DHFRL1       | 1.00 | 9.49E-01 | 9.80E-01 | 836.82  | not significant |
| 6469 | YIPF5        | 1.00 | 9.47E-01 | 9.79E-01 | 1350.53 | not significant |
| 6470 | ANKRD50      | 1.00 | 9.48E-01 | 9.80E-01 | 1265.10 | not significant |
| 6471 | LRRC8B       | 1.00 | 9.21E-01 | 9.70E-01 | 514.03  | not significant |
| 6472 | LRT3         | 1.00 | 7.99E-01 | NA       | 15.09   | not significant |
| 6473 | AGAP5        | 1.00 | 8.96E-01 | NA       | 61.73   | not significant |
| 6474 | DOCK9-AS2    | 1.00 | 7.65E-01 | NA       | 12.03   | not significant |
| 6475 | PLXNB2       | 1.00 | 8.21E-01 | NA       | 18.17   | not significant |
| 6476 | GUCY2D       | 1.00 | 7.38E-01 | NA       | 10.30   | not significant |
| 6477 | MAP1LC3B2    | 1.00 | 7.76E-01 | NA       | 13.05   | not significant |
| 6478 | PDE6B        | 1.00 | 9.33E-01 | 9.75E-01 | 327.39  | not significant |
| 6479 | ETFB         | 1.00 | 9.42E-01 | 9.79E-01 | 814.62  | not significant |
| 6480 | SDF2         | 1.00 | 9.52E-01 | 9.82E-01 | 1018.66 | not significant |
| 6481 | MTHFSD       | 1.00 | 9.35E-01 | 9.75E-01 | 554.27  | not significant |
| 6482 | ADIPOR1      | 1.00 | 9.37E-01 | 9.77E-01 | 3802.55 | not significant |
| 6483 | PDIK1L       | 1.00 | 9.44E-01 | 9.79E-01 | 1543.39 | not significant |
| 6484 | HIST1H2AL    | 1.00 | 8.05E-01 | NA       | 18.71   | not significant |
| 6485 | SMG1         | 1.00 | 9.47E-01 | 9.79E-01 | 7345.44 | not significant |
| 6486 | NLRP3        | 1.00 | 8.29E-01 | NA       | 22.22   | not significant |
| 6487 | CXorf21      | 1.00 | 8.50E-01 | NA       | 32.42   | not significant |
| 6488 | PVRL3        | 1.00 | 9.45E-01 | 9.79E-01 | 1151.02 | not significant |
| 6489 | HIST1H3C     | 1.00 | 8.47E-01 | NA       | 34.06   | not significant |
| 6490 | PARP11       | 1.00 | 9.52E-01 | 9.82E-01 | 925.38  | not significant |
| 6491 | FAM86C1      | 1.00 | 9.31E-01 | 9.74E-01 | 171.32  | not significant |
| 6492 | HOXC4        | 1.00 | 9.33E-01 | 9.75E-01 | 251.58  | not significant |
| 6493 | LPAR2        | 1.00 | 9.31E-01 | 9.75E-01 | 211.71  | not significant |
| 6494 | ITGB4        | 1.00 | 8.60E-01 | NA       | 37.30   | not significant |
| 6495 | GPR83        | 1.00 | 7.77E-01 | NA       | 14.20   | not significant |
| 6496 | JHDM1D-AS1   | 1.00 | 8.96E-01 | NA       | 84.24   | not significant |
| 6497 | FER          | 1.00 | 8.64E-01 | 9.45E-01 | 244.02  | not significant |
| 6498 | SPIN2B       | 1.00 | 8.95E-01 | NA       | 78.58   | not significant |
| 6499 | SNAI3-AS1    | 1.00 | 5.11E-01 | NA       | 39.11   | not significant |

|      |              |      |          |          |          |                 |
|------|--------------|------|----------|----------|----------|-----------------|
| 6500 | B9D2         | 1.00 | 9.20E-01 | 9.69E-01 | 157.77   | not significant |
| 6501 | ID3          | 1.00 | 9.38E-01 | 9.77E-01 | 747.19   | not significant |
| 6502 | TUBE1        | 1.00 | 9.35E-01 | 9.75E-01 | 242.95   | not significant |
| 6503 | RPL36AL      | 1.00 | 9.47E-01 | 9.80E-01 | 3890.09  | not significant |
| 6504 | TIMM10B      | 1.00 | 9.44E-01 | 9.79E-01 | 2121.17  | not significant |
| 6505 | LOC493754    | 1.00 | 9.27E-01 | 9.73E-01 | 496.64   | not significant |
| 6506 | ATP5A1       | 1.00 | 9.48E-01 | 9.80E-01 | 18145.64 | not significant |
| 6507 | LAMTOR5      | 1.00 | 8.48E-01 | 9.36E-01 | 2192.73  | not significant |
| 6508 | UBR7         | 1.00 | 9.22E-01 | 9.70E-01 | 6699.48  | not significant |
| 6509 | POMGNT1      | 1.00 | 9.37E-01 | 9.77E-01 | 2562.84  | not significant |
| 6510 | CNDP2        | 1.00 | 9.09E-01 | 9.65E-01 | 6764.72  | not significant |
| 6511 | POLB         | 1.00 | 9.42E-01 | 9.79E-01 | 1226.62  | not significant |
| 6512 | MDM4         | 1.00 | 9.41E-01 | 9.78E-01 | 1536.84  | not significant |
| 6513 | PDS5B        | 1.00 | 9.40E-01 | 9.78E-01 | 3804.44  | not significant |
| 6514 | NOP9         | 1.00 | 9.38E-01 | 9.77E-01 | 2999.35  | not significant |
| 6515 | KHDRBS3      | 1.00 | 8.87E-01 | NA       | 63.68    | not significant |
| 6516 | LOC284454    | 1.00 | 7.85E-01 | NA       | 20.02    | not significant |
| 6517 | AFAP1L2      | 1.00 | 7.59E-01 | NA       | 12.65    | not significant |
| 6518 | RSPH3        | 1.00 | 8.99E-01 | NA       | 82.01    | not significant |
| 6519 | S100A4       | 1.00 | 8.04E-01 | NA       | 20.37    | not significant |
| 6520 | H3F3C        | 1.00 | 8.71E-01 | NA       | 48.07    | not significant |
| 6521 | RNF144B      | 1.00 | 7.71E-01 | NA       | 15.03    | not significant |
| 6522 | SMCO4        | 1.00 | 8.59E-01 | NA       | 39.70    | not significant |
| 6523 | SEC24B-AS1   | 1.00 | 8.15E-01 | NA       | 24.07    | not significant |
| 6524 | TSC2D1-AS1   | 1.00 | 6.95E-01 | NA       | 9.25     | not significant |
| 6525 | CTU1         | 1.00 | 9.35E-01 | 9.75E-01 | 384.49   | not significant |
| 6526 | ADORA2B      | 1.00 | 9.47E-01 | 9.80E-01 | 465.82   | not significant |
| 6527 | TRIM21       | 1.00 | 9.45E-01 | 9.79E-01 | 730.60   | not significant |
| 6528 | ATF7IP2      | 1.00 | 9.35E-01 | 9.75E-01 | 614.57   | not significant |
| 6529 | RASSF8       | 1.00 | 9.32E-01 | 9.75E-01 | 409.62   | not significant |
| 6530 | RAD21        | 1.00 | 9.04E-01 | 9.63E-01 | 29984.46 | not significant |
| 6531 | SIVA1        | 1.00 | 9.45E-01 | 9.79E-01 | 4147.65  | not significant |
| 6532 | UNC119B      | 1.00 | 9.32E-01 | 9.75E-01 | 3950.91  | not significant |
| 6533 | RUNDC1       | 1.00 | 9.38E-01 | 9.77E-01 | 910.50   | not significant |
| 6534 | HIST1H2AH    | 1.00 | 8.27E-01 | NA       | 26.73    | not significant |
| 6535 | KIAA0754     | 1.00 | 9.17E-01 | 9.68E-01 | 1693.59  | not significant |
| 6536 | ATP6V0A1     | 1.00 | 8.72E-01 | NA       | 48.93    | not significant |
| 6537 | PSTPIP1      | 1.00 | 9.23E-01 | 9.71E-01 | 479.49   | not significant |
| 6538 | ADAMTS19     | 1.00 | 7.32E-01 | NA       | 10.92    | not significant |
| 6539 | CERCAM       | 1.00 | 7.58E-01 | NA       | 13.91    | not significant |
| 6540 | ZNF836       | 1.00 | 9.21E-01 | 9.70E-01 | 237.71   | not significant |
| 6541 | BTBD8        | 1.00 | 7.95E-01 | NA       | 19.07    | not significant |
| 6542 | PRUNE2       | 1.00 | 9.34E-01 | 9.75E-01 | 574.86   | not significant |
| 6543 | PLXNA3       | 1.00 | 8.56E-01 | 9.41E-01 | 390.86   | not significant |
| 6544 | BMF          | 1.00 | 8.23E-01 | NA       | 25.46    | not significant |
| 6545 | LINC01296    | 1.00 | 6.84E-01 | NA       | 8.40     | not significant |
| 6546 | LOC344967    | 1.00 | 7.18E-01 | NA       | 10.27    | not significant |
| 6547 | MDF1         | 1.00 | 9.36E-01 | 9.76E-01 | 1329.92  | not significant |
| 6548 | C3orf38      | 1.00 | 9.37E-01 | 9.77E-01 | 1317.95  | not significant |
| 6549 | DAP          | 1.00 | 9.33E-01 | 9.75E-01 | 3066.71  | not significant |
| 6550 | RALB         | 1.00 | 9.34E-01 | 9.75E-01 | 662.51   | not significant |
| 6551 | APEX2        | 1.00 | 9.37E-01 | 9.77E-01 | 1733.19  | not significant |
| 6552 | MPDU1        | 1.00 | 9.35E-01 | 9.75E-01 | 2018.68  | not significant |
| 6553 | DNASE1L1     | 1.00 | 8.24E-01 | NA       | 30.37    | not significant |
| 6554 | PPM1A        | 1.00 | 9.30E-01 | 9.74E-01 | 3962.49  | not significant |
| 6555 | CUL4A        | 1.00 | 9.24E-01 | 9.72E-01 | 6548.13  | not significant |
| 6556 | GFP2         | 1.00 | 8.08E-01 | NA       | 27.11    | not significant |
| 6557 | ICAM4        | 1.00 | 8.20E-01 | NA       | 27.47    | not significant |
| 6558 | LOC101927415 | 1.00 | 7.93E-01 | NA       | 20.60    | not significant |
| 6559 | BSPRY        | 1.00 | 8.74E-01 | NA       | 64.58    | not significant |
| 6560 | CD72         | 1.00 | 7.58E-01 | NA       | 14.95    | not significant |
| 6561 | CD79A        | 1.00 | 8.94E-01 | 9.60E-01 | 193.19   | not significant |
| 6562 | LIPC         | 1.00 | 8.43E-01 | NA       | 42.25    | not significant |
| 6563 | TGM1         | 1.00 | 8.44E-01 | NA       | 38.80    | not significant |
| 6564 | PHTF1        | 1.00 | 8.97E-01 | 9.61E-01 | 122.83   | not significant |
| 6565 | CCDC135      | 1.00 | 7.33E-01 | NA       | 11.78    | not significant |
| 6566 | TAF1L        | 1.00 | 6.78E-01 | NA       | 8.93     | not significant |
| 6567 | ZNF846       | 1.00 | 8.57E-01 | NA       | 60.16    | not significant |
| 6568 | AMN          | 1.00 | 9.11E-01 | 9.66E-01 | 219.00   | not significant |
| 6569 | COX6A1       | 1.00 | 9.30E-01 | 9.74E-01 | 3859.49  | not significant |
| 6570 | CCDC17       | 1.00 | 8.17E-01 | NA       | 33.70    | not significant |
| 6571 | NAPA         | 1.00 | 9.31E-01 | 9.74E-01 | 2462.10  | not significant |
| 6572 | GDPD3        | 1.00 | 8.86E-01 | NA       | 80.93    | not significant |
| 6573 | EIF2AK1      | 1.00 | 9.03E-01 | 9.63E-01 | 8817.19  | not significant |
| 6574 | MYL5         | 1.00 | 8.41E-01 | NA       | 41.11    | not significant |
| 6575 | MSTO1        | 1.00 | 9.02E-01 | 9.63E-01 | 118.23   | not significant |
| 6576 | C21orf91     | 1.00 | 9.40E-01 | 9.78E-01 | 2159.45  | not significant |
| 6577 | ANKRD9       | 1.00 | 8.04E-01 | NA       | 26.11    | not significant |
| 6578 | EXT1         | 1.00 | 9.09E-01 | 9.65E-01 | 499.08   | not significant |
| 6579 | GOPC         | 1.00 | 9.03E-01 | 9.63E-01 | 2665.83  | not significant |
| 6580 | P2RY10       | 1.00 | 9.00E-01 | 9.62E-01 | 354.37   | not significant |
| 6581 | ZNF623       | 1.00 | 9.32E-01 | 9.75E-01 | 908.22   | not significant |
| 6582 | HLA-J        | 1.00 | 7.00E-01 | NA       | 10.77    | not significant |
| 6583 | CXorf40B     | 1.00 | 9.14E-01 | 9.67E-01 | 125.55   | not significant |
| 6584 | RPL15        | 1.00 | 5.65E-01 | 7.80E-01 | 13484.54 | not significant |
| 6585 | LOC102723701 | 1.00 | 7.98E-01 | NA       | 23.50    | not significant |
| 6586 | ABCA4        | 1.00 | 8.32E-01 | NA       | 35.39    | not significant |
| 6587 | C4BPB        | 1.00 | 6.83E-01 | NA       | 10.37    | not significant |

|      |                |      |          |          |          |                 |
|------|----------------|------|----------|----------|----------|-----------------|
| 6588 | SMG1P3         | 1.00 | 9.23E-01 | NA       | 89.89    | not significant |
| 6589 | ARHGAP29       | 1.00 | 7.31E-01 | NA       | 13.70    | not significant |
| 6590 | GALK2          | 1.00 | 9.25E-01 | 9.72E-01 | 425.96   | not significant |
| 6591 | PIAS1          | 1.00 | 8.40E-01 | 9.32E-01 | 953.65   | not significant |
| 6592 | PAXBP1         | 1.00 | 9.56E-01 | 9.84E-01 | 2548.73  | not significant |
| 6593 | EXOC2          | 1.00 | 9.35E-01 | 9.75E-01 | 2253.94  | not significant |
| 6594 | FOXD2          | 1.00 | 7.66E-01 | NA       | 19.29    | not significant |
| 6595 | ZNF160         | 1.00 | 9.45E-01 | 9.79E-01 | 998.44   | not significant |
| 6596 | CRYZL1         | 1.00 | 9.27E-01 | 9.73E-01 | 665.48   | not significant |
| 6597 | BCOR           | 1.00 | 9.33E-01 | 9.75E-01 | 3486.25  | not significant |
| 6598 | FBXO22         | 1.00 | 9.22E-01 | 9.70E-01 | 392.76   | not significant |
| 6599 | POLK           | 1.00 | 9.33E-01 | 9.75E-01 | 1476.66  | not significant |
| 6600 | ARRDC4         | 1.00 | 8.36E-01 | NA       | 36.90    | not significant |
| 6601 | TRPV3          | 1.00 | 7.32E-01 | NA       | 14.64    | not significant |
| 6602 | CYP4F3         | 1.00 | 6.45E-01 | NA       | 9.21     | not significant |
| 6603 | LOC101929057   | 1.00 | 8.06E-01 | NA       | 27.20    | not significant |
| 6604 | LTBP1          | 1.00 | 8.62E-01 | NA       | 57.83    | not significant |
| 6605 | KLKB1          | 1.00 | 6.63E-01 | NA       | 9.70     | not significant |
| 6606 | STK32C         | 1.00 | 7.29E-01 | NA       | 14.66    | not significant |
| 6607 | MIF4GD         | 1.00 | 2.61E-01 | 5.30E-01 | 524.65   | not significant |
| 6608 | LOC100506990   | 1.00 | 8.96E-01 | 9.61E-01 | 143.92   | not significant |
| 6609 | SOC51          | 1.00 | 9.30E-01 | 9.74E-01 | 4935.74  | not significant |
| 6610 | ZNF790         | 1.00 | 9.14E-01 | 9.67E-01 | 234.24   | not significant |
| 6611 | ALG5           | 1.00 | 9.27E-01 | 9.73E-01 | 1450.43  | not significant |
| 6612 | LOC101928767   | 1.00 | 8.47E-01 | NA       | 49.45    | not significant |
| 6613 | MGAT2          | 1.00 | 9.25E-01 | 9.72E-01 | 2348.13  | not significant |
| 6614 | GPR65          | 1.00 | 9.14E-01 | 9.67E-01 | 557.21   | not significant |
| 6615 | SGCB           | 1.00 | 9.27E-01 | 9.73E-01 | 1230.04  | not significant |
| 6616 | PTGR2          | 1.00 | 9.11E-01 | 9.66E-01 | 270.33   | not significant |
| 6617 | MYOM1          | 1.00 | 6.88E-01 | NA       | 11.90    | not significant |
| 6618 | NPAT           | 1.00 | 9.28E-01 | 9.73E-01 | 2290.55  | not significant |
| 6619 | BAG2           | 1.00 | 9.26E-01 | 9.73E-01 | 605.22   | not significant |
| 6620 | C9orf47        | 1.00 | 6.63E-01 | NA       | 9.97     | not significant |
| 6621 | MAP3K9         | 1.00 | 9.27E-01 | 9.73E-01 | 792.28   | not significant |
| 6622 | RTN4R          | 1.00 | 9.22E-01 | 9.70E-01 | 404.26   | not significant |
| 6623 | ACRC           | 1.00 | 8.49E-01 | NA       | 52.04    | not significant |
| 6624 | IGSF9B         | 1.00 | 9.06E-01 | 9.64E-01 | 240.67   | not significant |
| 6625 | GCNT4          | 1.00 | 8.29E-01 | NA       | 41.75    | not significant |
| 6626 | LINC01278      | 1.00 | 6.86E-01 | NA       | 11.46    | not significant |
| 6627 | HTATSF1P2      | 1.00 | 8.93E-01 | 9.60E-01 | 121.71   | not significant |
| 6628 | ARHGAP19-SLIT1 | 1.00 | 7.82E-01 | NA       | 25.22    | not significant |
| 6629 | GOLM1          | 1.00 | 6.21E-01 | NA       | 9.11     | not significant |
| 6630 | NIF3L1         | 1.00 | 9.25E-01 | 9.72E-01 | 1341.24  | not significant |
| 6631 | POLR2I         | 1.00 | 9.24E-01 | 9.72E-01 | 1223.49  | not significant |
| 6632 | SFXN4          | 1.00 | 9.22E-01 | 9.70E-01 | 1593.54  | not significant |
| 6633 | SNRPB          | 1.00 | 9.07E-01 | 9.64E-01 | 14344.39 | not significant |
| 6634 | GJA3           | 1.00 | 7.98E-01 | NA       | 30.74    | not significant |
| 6635 | TMEM185A       | 1.00 | 8.48E-01 | NA       | 60.56    | not significant |
| 6636 | WAC-AS1        | 1.00 | 9.16E-01 | 9.68E-01 | 300.53   | not significant |
| 6637 | P2RX5-TAX1BP3  | 1.00 | 8.99E-01 | 9.62E-01 | 161.22   | not significant |
| 6638 | ETV7           | 1.00 | 6.47E-01 | NA       | 9.67     | not significant |
| 6639 | SCARF2         | 1.00 | 7.26E-01 | NA       | 15.77    | not significant |
| 6640 | VWA7           | 1.00 | 6.84E-01 | NA       | 12.95    | not significant |
| 6641 | DPEP2          | 1.00 | 6.90E-01 | NA       | 12.79    | not significant |
| 6642 | ZCWPW2         | 1.00 | 6.50E-01 | NA       | 10.63    | not significant |
| 6643 | RPAIN          | 1.00 | 9.20E-01 | 9.70E-01 | 1607.72  | not significant |
| 6644 | IER5           | 1.00 | 9.20E-01 | 9.69E-01 | 2549.27  | not significant |
| 6645 | XPNPEP2        | 1.00 | 9.22E-01 | 9.70E-01 | 1464.72  | not significant |
| 6646 | ORMDL1         | 1.00 | 9.21E-01 | 9.70E-01 | 3123.62  | not significant |
| 6647 | CYB5B          | 1.00 | 9.06E-01 | 9.64E-01 | 6431.39  | not significant |
| 6648 | GSTP1          | 1.00 | 9.02E-01 | 9.63E-01 | 12266.16 | not significant |
| 6649 | MAFK           | 1.00 | 9.18E-01 | 9.69E-01 | 2484.43  | not significant |
| 6650 | PIP4K2A        | 1.00 | 9.17E-01 | 9.68E-01 | 4756.62  | not significant |
| 6651 | GIGYF2         | 1.00 | 9.45E-01 | 9.79E-01 | 3318.32  | not significant |
| 6652 | TP53BP2        | 1.00 | 9.20E-01 | 9.69E-01 | 2697.81  | not significant |
| 6653 | WBSCR16        | 1.00 | 9.14E-01 | 9.67E-01 | 398.00   | not significant |
| 6654 | CAMK1D         | 1.00 | 9.07E-01 | 9.64E-01 | 308.84   | not significant |
| 6655 | BCAS3          | 1.00 | 9.09E-01 | 9.65E-01 | 273.86   | not significant |
| 6656 | CTC-338M12.4   | 1.00 | 2.85E-03 | 2.71E-02 | 1507.27  | not significant |
| 6657 | HIST1H3I       | 1.00 | 7.64E-01 | NA       | 24.72    | not significant |
| 6658 | FANCB          | 1.00 | 8.73E-01 | 9.50E-01 | 438.90   | not significant |
| 6659 | LRRN1          | 1.00 | 7.83E-01 | NA       | 32.88    | not significant |
| 6660 | C1QL1          | 1.00 | 7.29E-01 | NA       | 16.71    | not significant |
| 6661 | RAD9B          | 1.00 | 7.49E-01 | NA       | 21.60    | not significant |
| 6662 | NOXO1          | 1.00 | 6.33E-01 | NA       | 10.46    | not significant |
| 6663 | APOL4          | 1.00 | 7.58E-01 | NA       | 22.97    | not significant |
| 6664 | CDKN2B-AS1     | 1.00 | 7.44E-01 | NA       | 23.45    | not significant |
| 6665 | PCDHGA10       | 1.00 | 6.96E-01 | NA       | 14.10    | not significant |
| 6666 | CD70           | 1.00 | 9.01E-01 | 9.63E-01 | 225.90   | not significant |
| 6667 | LOC100506474   | 1.00 | 9.32E-01 | 9.75E-01 | 140.92   | not significant |
| 6668 | SYAP1          | 1.00 | 9.77E-01 | 9.94E-01 | 875.34   | not significant |
| 6669 | POC1A          | 1.00 | 9.19E-01 | 9.69E-01 | 1491.14  | not significant |
| 6670 | P2RX5          | 1.00 | 9.25E-01 | 9.72E-01 | 2992.70  | not significant |
| 6671 | ATP5J          | 1.00 | 8.47E-01 | 9.36E-01 | 3354.04  | not significant |
| 6672 | STK38L         | 1.00 | 9.17E-01 | 9.68E-01 | 1736.35  | not significant |
| 6673 | TPR            | 1.00 | 9.16E-01 | 9.68E-01 | 9245.77  | not significant |
| 6674 | RPS18P9        | 1.00 | 8.12E-01 | NA       | 44.30    | not significant |
| 6675 | ZDHHC7         | 1.00 | 9.18E-01 | 9.69E-01 | 1706.76  | not significant |

|      |              |      |          |          |          |                 |
|------|--------------|------|----------|----------|----------|-----------------|
| 6676 | XYLB         | 1.00 | 9.06E-01 | 9.64E-01 | 657.46   | not significant |
| 6677 | KIF21A       | 1.00 | 9.05E-01 | 9.64E-01 | 288.67   | not significant |
| 6678 | ANKRD37      | 1.00 | 8.42E-01 | NA       | 61.78    | not significant |
| 6679 | MMP15        | 1.00 | 7.77E-01 | NA       | 29.84    | not significant |
| 6680 | MSTO2P       | 1.00 | 8.98E-01 | 9.61E-01 | 228.08   | not significant |
| 6681 | GBP2         | 1.00 | 7.02E-01 | NA       | 17.93    | not significant |
| 6682 | EFNA1        | 1.00 | 8.71E-01 | 9.49E-01 | 105.69   | not significant |
| 6683 | KAZALD1      | 1.00 | 6.92E-01 | NA       | 15.14    | not significant |
| 6684 | PCDHGA5      | 1.00 | 6.64E-01 | NA       | 12.63    | not significant |
| 6685 | INO80B       | 1.00 | 6.61E-01 | NA       | 12.21    | not significant |
| 6686 | CLMN         | 1.00 | 6.66E-01 | NA       | 12.88    | not significant |
| 6687 | TMEM81       | 1.00 | 8.63E-01 | NA       | 89.23    | not significant |
| 6688 | GPC6         | 1.00 | 8.54E-01 | NA       | 74.32    | not significant |
| 6689 | CCL28        | 1.00 | 7.26E-01 | NA       | 19.61    | not significant |
| 6690 | SLC9A9       | 1.00 | 8.32E-01 | NA       | 55.51    | not significant |
| 6691 | NDUFB1       | 1.00 | 9.17E-01 | 9.68E-01 | 863.19   | not significant |
| 6692 | MTHFS        | 1.00 | 7.52E-01 | NA       | 27.08    | not significant |
| 6693 | HSD17B4      | 1.00 | 9.12E-01 | 9.66E-01 | 2681.94  | not significant |
| 6694 | PTPN23       | 1.00 | 9.17E-01 | 9.68E-01 | 2219.78  | not significant |
| 6695 | NHP2         | 1.00 | 9.11E-01 | 9.66E-01 | 5367.80  | not significant |
| 6696 | RSPRY1       | 1.00 | 9.16E-01 | 9.68E-01 | 1398.51  | not significant |
| 6697 | KIAA0247     | 1.00 | 9.03E-01 | 9.63E-01 | 2588.69  | not significant |
| 6698 | ZNF181       | 1.00 | 9.08E-01 | 9.65E-01 | 329.40   | not significant |
| 6699 | ZNF782       | 1.00 | 8.75E-01 | 9.51E-01 | 154.67   | not significant |
| 6700 | 43719_6028   | 1.00 | 9.14E-01 | 9.67E-01 | 523.13   | not significant |
| 6701 | ZDBF2        | 1.00 | 7.74E-01 | NA       | 29.09    | not significant |
| 6702 | SAMD15       | 1.00 | 6.74E-01 | NA       | 14.00    | not significant |
| 6703 | GPANK1       | 1.00 | 8.72E-01 | NA       | 92.60    | not significant |
| 6704 | AKR7L        | 1.00 | 7.00E-01 | NA       | 16.89    | not significant |
| 6705 | SKOR1        | 1.00 | 7.06E-01 | NA       | 18.17    | not significant |
| 6706 | PLEK         | 1.00 | 6.55E-01 | NA       | 12.85    | not significant |
| 6707 | FAM132A      | 1.00 | 5.73E-01 | NA       | 8.37     | not significant |
| 6708 | MRPL55       | 1.00 | 9.12E-01 | 9.66E-01 | 855.00   | not significant |
| 6709 | FBXL5        | 1.00 | 9.14E-01 | 9.67E-01 | 1437.38  | not significant |
| 6710 | KEAP1        | 1.00 | 9.24E-01 | 9.72E-01 | 3018.85  | not significant |
| 6711 | MCL1         | 1.00 | 8.60E-01 | 9.43E-01 | 5911.77  | not significant |
| 6712 | MIR4435-1HG  | 1.00 | 8.84E-01 | 9.56E-01 | 172.55   | not significant |
| 6713 | LIN7B        | 1.00 | 8.32E-01 | NA       | 65.25    | not significant |
| 6714 | BMPR2        | 1.00 | 9.12E-01 | 9.66E-01 | 630.04   | not significant |
| 6715 | TTC24        | 1.00 | 9.05E-01 | 9.64E-01 | 403.80   | not significant |
| 6716 | MYOZ3        | 1.00 | 7.55E-01 | NA       | 28.87    | not significant |
| 6717 | PRRT3        | 1.00 | 8.24E-01 | NA       | 53.66    | not significant |
| 6718 | MSS51        | 1.00 | 7.91E-01 | NA       | 38.50    | not significant |
| 6719 | AVP1         | 1.00 | 6.93E-01 | NA       | 16.35    | not significant |
| 6720 | TTC3P1       | 1.00 | 6.43E-01 | NA       | 13.60    | not significant |
| 6721 | HSD17B6      | 1.00 | 8.78E-01 | 9.52E-01 | 174.11   | not significant |
| 6722 | UNC50        | 1.00 | 9.20E-01 | 9.69E-01 | 1058.68  | not significant |
| 6723 | STK16        | 1.00 | 8.96E-01 | 9.61E-01 | 588.96   | not significant |
| 6724 | ATOX1        | 1.00 | 9.09E-01 | 9.65E-01 | 528.34   | not significant |
| 6725 | UBL4A        | 1.00 | 8.83E-01 | 9.55E-01 | 502.11   | not significant |
| 6726 | WDR24        | 1.00 | 9.13E-01 | 9.66E-01 | 1136.39  | not significant |
| 6727 | IFT52        | 1.00 | 9.29E-01 | 9.73E-01 | 1085.07  | not significant |
| 6728 | EIF3M        | 1.00 | 9.03E-01 | 9.63E-01 | 10479.94 | not significant |
| 6729 | ZNF76        | 1.00 | 9.16E-01 | 9.68E-01 | 1532.82  | not significant |
| 6730 | CCDC82       | 1.00 | 9.09E-01 | 9.65E-01 | 1423.09  | not significant |
| 6731 | LZTS1        | 1.00 | 8.99E-01 | 9.62E-01 | 6001.32  | not significant |
| 6732 | OIP5-AS1     | 1.00 | 9.09E-01 | 9.65E-01 | 2038.37  | not significant |
| 6733 | THEMIS       | 1.00 | 9.16E-01 | 9.68E-01 | 2150.66  | not significant |
| 6734 | ZNRD1        | 1.00 | 8.96E-01 | 9.61E-01 | 338.62   | not significant |
| 6735 | RORA         | 1.00 | 9.09E-01 | 9.65E-01 | 863.55   | not significant |
| 6736 | GPR107       | 1.00 | 9.05E-01 | 9.64E-01 | 574.56   | not significant |
| 6737 | PCBP3        | 1.00 | 8.92E-01 | 9.60E-01 | 467.33   | not significant |
| 6738 | CDON         | 1.00 | 9.05E-01 | 9.63E-01 | 477.14   | not significant |
| 6739 | RNF139-AS1   | 1.00 | 7.48E-01 | NA       | 31.33    | not significant |
| 6740 | PELI3        | 1.00 | 8.08E-01 | NA       | 48.48    | not significant |
| 6741 | ZNF518A      | 1.00 | 8.40E-01 | NA       | 77.74    | not significant |
| 6742 | LOC100506713 | 1.00 | 7.53E-01 | NA       | 30.80    | not significant |
| 6743 | LOXL1        | 1.00 | 7.53E-01 | NA       | 27.37    | not significant |
| 6744 | NUDT9P1      | 1.00 | 6.94E-01 | NA       | 18.15    | not significant |
| 6745 | MICALCL      | 1.00 | 6.61E-01 | NA       | 15.24    | not significant |
| 6746 | LY86         | 1.00 | 5.23E-01 | NA       | 8.34     | not significant |
| 6747 | CHPT1        | 1.00 | 9.01E-01 | 9.63E-01 | 750.45   | not significant |
| 6748 | SMC3         | 1.00 | 8.96E-01 | 9.61E-01 | 6462.53  | not significant |
| 6749 | REEP4        | 1.00 | 9.05E-01 | 9.63E-01 | 1579.57  | not significant |
| 6750 | LRFN4        | 1.00 | 9.05E-01 | 9.64E-01 | 1985.96  | not significant |
| 6751 | SNRPD2       | 1.00 | 8.89E-01 | 9.58E-01 | 6195.76  | not significant |
| 6752 | SLC2A1       | 1.00 | 9.13E-01 | 9.66E-01 | 1537.73  | not significant |
| 6753 | FUT4         | 1.00 | 9.07E-01 | 9.64E-01 | 1880.46  | not significant |
| 6754 | DIS3L        | 1.00 | 9.08E-01 | 9.65E-01 | 1471.65  | not significant |
| 6755 | DVL1         | 1.00 | 9.09E-01 | 9.65E-01 | 1495.18  | not significant |
| 6756 | RAB3IP       | 1.00 | 9.09E-01 | 9.65E-01 | 1418.61  | not significant |
| 6757 | AGBL3        | 1.00 | 7.53E-01 | NA       | 34.49    | not significant |
| 6758 | HECTD2       | 1.00 | 8.19E-01 | NA       | 57.19    | not significant |
| 6759 | BCO2         | 1.00 | 7.03E-01 | NA       | 21.06    | not significant |
| 6760 | HRH2         | 1.00 | 6.36E-01 | NA       | 14.21    | not significant |
| 6761 | LOC100131347 | 1.00 | 5.71E-01 | NA       | 9.72     | not significant |
| 6762 | SLC16A4      | 1.00 | 5.46E-01 | NA       | 8.30     | not significant |
| 6763 | BOD1         | 1.00 | 9.02E-01 | 9.63E-01 | 853.79   | not significant |



|      |               |      |          |          |          |                 |
|------|---------------|------|----------|----------|----------|-----------------|
| 6764 | ARFGEF2       | 1.00 | 8.89E-01 | 9.58E-01 | 4109.92  | not significant |
| 6765 | HEATR5B       | 1.00 | 9.06E-01 | 9.64E-01 | 1225.46  | not significant |
| 6766 | QDPR          | 1.00 | 9.26E-01 | 9.72E-01 | 1089.42  | not significant |
| 6767 | LRP11         | 1.00 | 9.01E-01 | 9.63E-01 | 2304.69  | not significant |
| 6768 | LIPE          | 1.00 | 8.92E-01 | 9.60E-01 | 302.05   | not significant |
| 6769 | ZSCAN29       | 1.00 | 9.05E-01 | 9.63E-01 | 1362.28  | not significant |
| 6770 | ATAD2B        | 1.00 | 9.06E-01 | 9.64E-01 | 1636.43  | not significant |
| 6771 | ZNF333        | 1.00 | 8.73E-01 | 9.50E-01 | 178.59   | not significant |
| 6772 | C22orf15      | 1.00 | 6.88E-01 | NA       | 19.66    | not significant |
| 6773 | ARHGAP23      | 1.00 | 8.76E-01 | 9.52E-01 | 198.31   | not significant |
| 6774 | MEI1          | 1.00 | 7.96E-01 | NA       | 48.72    | not significant |
| 6775 | ZNF853        | 1.00 | 6.79E-01 | NA       | 18.93    | not significant |
| 6776 | KCTD21-AS1    | 1.00 | 6.21E-01 | NA       | 13.73    | not significant |
| 6777 | SNX21         | 1.00 | 6.21E-01 | NA       | 15.09    | not significant |
| 6778 | FLT3          | 1.00 | 6.02E-01 | NA       | 11.46    | not significant |
| 6779 | MARK4         | 1.00 | 9.68E-01 | 9.90E-01 | 1571.94  | not significant |
| 6780 | ITPA          | 1.00 | 9.03E-01 | 9.63E-01 | 1690.84  | not significant |
| 6781 | SCO2          | 1.00 | 8.92E-01 | 9.60E-01 | 395.89   | not significant |
| 6782 | PAPOLG        | 1.00 | 9.03E-01 | 9.63E-01 | 1385.61  | not significant |
| 6783 | STIM1         | 1.00 | 8.86E-01 | 9.56E-01 | 4776.54  | not significant |
| 6784 | MAMSTR        | 1.00 | 7.03E-01 | NA       | 22.97    | not significant |
| 6785 | TSC1          | 1.00 | 9.04E-01 | 9.63E-01 | 961.02   | not significant |
| 6786 | CCDC146       | 1.00 | 8.93E-01 | 9.60E-01 | 329.74   | not significant |
| 6787 | OPN3          | 1.00 | 9.02E-01 | 9.63E-01 | 910.58   | not significant |
| 6788 | PPM1D         | 1.00 | 9.00E-01 | 9.63E-01 | 1719.85  | not significant |
| 6789 | SNAPC4        | 1.00 | 9.04E-01 | 9.63E-01 | 844.79   | not significant |
| 6790 | CTD-2201118.1 | 1.00 | 6.40E-01 | NA       | 15.32    | not significant |
| 6791 | ZNF624        | 1.00 | 8.73E-01 | 9.50E-01 | 235.23   | not significant |
| 6792 | EID2B         | 1.00 | 8.35E-01 | NA       | 91.49    | not significant |
| 6793 | TOLLIP-AS1    | 1.00 | 6.24E-01 | NA       | 13.79    | not significant |
| 6794 | LRRCL16A      | 1.00 | 6.40E-01 | NA       | 15.55    | not significant |
| 6795 | CDKN2B        | 1.00 | 5.91E-01 | NA       | 12.72    | not significant |
| 6796 | NPFF          | 1.00 | 7.12E-01 | NA       | 27.25    | not significant |
| 6797 | GDI1          | 1.00 | 8.98E-01 | 9.62E-01 | 797.98   | not significant |
| 6798 | FAM207A       | 1.00 | 9.03E-01 | 9.63E-01 | 755.28   | not significant |
| 6799 | PTPN9         | 1.00 | 8.98E-01 | 9.61E-01 | 2010.66  | not significant |
| 6800 | ZNF789        | 1.00 | 8.79E-01 | 9.52E-01 | 200.11   | not significant |
| 6801 | GPN3          | 1.00 | 8.97E-01 | 9.61E-01 | 1901.50  | not significant |
| 6802 | DLG5          | 1.00 | 8.99E-01 | 9.62E-01 | 1126.53  | not significant |
| 6803 | ENPP4         | 1.00 | 9.02E-01 | 9.63E-01 | 945.14   | not significant |
| 6804 | ZNF320        | 1.00 | 8.98E-01 | 9.62E-01 | 1558.39  | not significant |
| 6805 | NBPF3         | 1.00 | 8.71E-01 | 9.49E-01 | 350.02   | not significant |
| 6806 | C12orf60      | 1.00 | 7.39E-01 | NA       | 33.63    | not significant |
| 6807 | ARHGEF17      | 1.00 | 7.42E-01 | NA       | 34.10    | not significant |
| 6808 | CAPN10-AS1    | 1.00 | 8.27E-01 | NA       | 94.32    | not significant |
| 6809 | CACNB4        | 1.00 | 6.43E-01 | NA       | 17.60    | not significant |
| 6810 | ALDH3B2       | 1.00 | 7.44E-01 | NA       | 32.45    | not significant |
| 6811 | TTC4          | 1.00 | 6.96E-01 | NA       | 23.61    | not significant |
| 6812 | LOC101929655  | 1.00 | 4.91E-01 | NA       | 8.13     | not significant |
| 6813 | PLSCR1        | 1.00 | 8.96E-01 | 9.61E-01 | 1528.16  | not significant |
| 6814 | UBE2D2        | 1.00 | 8.97E-01 | 9.61E-01 | 6501.12  | not significant |
| 6815 | E2F6          | 1.00 | 9.17E-01 | 9.68E-01 | 1109.78  | not significant |
| 6816 | UBE2H         | 1.00 | 8.95E-01 | 9.61E-01 | 1642.32  | not significant |
| 6817 | DCP1B         | 1.00 | 8.93E-01 | 9.60E-01 | 479.23   | not significant |
| 6818 | SLC33A1       | 1.00 | 9.00E-01 | 9.62E-01 | 1113.36  | not significant |
| 6819 | ZC3H3         | 1.00 | 8.97E-01 | 9.61E-01 | 1244.67  | not significant |
| 6820 | ELMO3         | 1.00 | 8.77E-01 | 9.52E-01 | 220.81   | not significant |
| 6821 | SSFA2         | 1.00 | 8.94E-01 | 9.60E-01 | 703.92   | not significant |
| 6822 | DPH7          | 1.00 | 8.96E-01 | 9.61E-01 | 832.04   | not significant |
| 6823 | FOXJ2         | 1.00 | 8.98E-01 | 9.62E-01 | 1322.83  | not significant |
| 6824 | WBP1          | 1.00 | 7.74E-01 | NA       | 47.49    | not significant |
| 6825 | EP300-AS1     | 1.00 | 7.01E-01 | NA       | 25.08    | not significant |
| 6826 | PRAM1         | 1.00 | 5.31E-01 | NA       | 9.76     | not significant |
| 6827 | PHOSPHO2      | 1.00 | 8.00E-01 | NA       | 63.15    | not significant |
| 6828 | LOC646214     | 1.00 | 7.08E-01 | NA       | 28.74    | not significant |
| 6829 | UAP1L1        | 1.00 | 7.04E-01 | NA       | 25.93    | not significant |
| 6830 | LOC400685     | 1.00 | 6.16E-01 | NA       | 18.62    | not significant |
| 6831 | ANK2          | 1.00 | 5.32E-01 | NA       | 11.34    | not significant |
| 6832 | AGAP2-AS1     | 1.00 | 6.37E-01 | NA       | 18.61    | not significant |
| 6833 | USP11         | 1.00 | 9.22E-01 | 9.70E-01 | 4139.24  | not significant |
| 6834 | EFNA3         | 1.00 | 7.91E-01 | NA       | 63.30    | not significant |
| 6835 | TCF3          | 1.00 | 8.70E-01 | 9.48E-01 | 10477.61 | not significant |
| 6836 | MGEA5         | 1.00 | 9.04E-01 | 9.63E-01 | 4107.50  | not significant |
| 6837 | NOL9          | 1.00 | 8.93E-01 | 9.60E-01 | 1431.37  | not significant |
| 6838 | CAPN15        | 1.00 | 8.97E-01 | 9.61E-01 | 2982.89  | not significant |
| 6839 | IGIP          | 1.00 | 8.18E-01 | NA       | 78.08    | not significant |
| 6840 | RTN4RL1       | 1.00 | 6.38E-01 | NA       | 18.98    | not significant |
| 6841 | GFM2          | 1.00 | 8.88E-01 | 9.58E-01 | 1692.01  | not significant |
| 6842 | NDUFB10       | 1.00 | 8.94E-01 | 9.61E-01 | 2418.79  | not significant |
| 6843 | PIH1D1        | 1.00 | 8.46E-01 | 9.36E-01 | 1784.85  | not significant |
| 6844 | CCDC71        | 1.00 | 8.89E-01 | 9.58E-01 | 706.39   | not significant |
| 6845 | AKT2          | 1.00 | 8.68E-01 | 9.47E-01 | 5504.79  | not significant |
| 6846 | C3orf17       | 1.00 | 8.94E-01 | 9.61E-01 | 1736.04  | not significant |
| 6847 | CRLF3         | 1.00 | 8.87E-01 | 9.57E-01 | 2252.51  | not significant |
| 6848 | ZNF767P       | 1.00 | 8.86E-01 | 9.56E-01 | 626.08   | not significant |
| 6849 | EFTUD1        | 1.00 | 8.97E-01 | 9.61E-01 | 1097.10  | not significant |
| 6850 | ITFG2         | 1.00 | 8.96E-01 | 9.61E-01 | 1071.21  | not significant |
| 6851 | UBL5          | 1.00 | 8.81E-01 | 9.54E-01 | 3415.71  | not significant |

|      |              |      |          |          |         |                 |
|------|--------------|------|----------|----------|---------|-----------------|
| 6852 | OGFRP1       | 1.00 | 7.27E-01 | NA       | 32.59   | not significant |
| 6853 | CEBPB-AS1    | 1.00 | 7.28E-01 | NA       | 34.68   | not significant |
| 6854 | LOC401127    | 1.00 | 5.75E-01 | NA       | 13.39   | not significant |
| 6855 | LCMT1-AS1    | 1.00 | 6.62E-01 | NA       | 21.95   | not significant |
| 6856 | GPR137C      | 1.00 | 7.38E-01 | NA       | 39.23   | not significant |
| 6857 | STC2         | 1.00 | 6.85E-01 | NA       | 24.72   | not significant |
| 6858 | LSM2         | 1.00 | 8.84E-01 | 9.56E-01 | 999.39  | not significant |
| 6859 | FDX1         | 1.00 | 8.48E-01 | 9.36E-01 | 710.06  | not significant |
| 6860 | CCDC109B     | 1.00 | 8.90E-01 | 9.59E-01 | 2266.99 | not significant |
| 6861 | CEP250       | 1.00 | 8.86E-01 | 9.56E-01 | 4046.51 | not significant |
| 6862 | FGF14-AS2    | 1.00 | 7.69E-01 | NA       | 59.61   | not significant |
| 6863 | MTMR6        | 1.00 | 8.80E-01 | 9.53E-01 | 2739.26 | not significant |
| 6864 | NFX1         | 1.00 | 8.86E-01 | 9.56E-01 | 2508.45 | not significant |
| 6865 | DNAJB5       | 1.00 | 8.76E-01 | 9.52E-01 | 322.96  | not significant |
| 6866 | FMO4         | 1.00 | 7.29E-01 | NA       | 37.14   | not significant |
| 6867 | KLHL3        | 1.00 | 8.64E-01 | 9.45E-01 | 570.55  | not significant |
| 6868 | FBXO43       | 1.00 | 8.59E-01 | 9.43E-01 | 188.01  | not significant |
| 6869 | ZDHHC14      | 1.00 | 8.16E-01 | NA       | 93.71   | not significant |
| 6870 | HIST1H3F     | 1.00 | 6.54E-01 | NA       | 24.04   | not significant |
| 6871 | GYS2         | 1.00 | 4.87E-01 | NA       | 10.48   | not significant |
| 6872 | UBE2MP1      | 1.00 | 7.49E-01 | NA       | 43.38   | not significant |
| 6873 | PARP15       | 1.00 | 8.08E-01 | 9.18E-01 | 107.00  | not significant |
| 6874 | CARNS1       | 1.00 | 7.29E-01 | NA       | 38.59   | not significant |
| 6875 | CNTD1        | 1.00 | 5.36E-01 | NA       | 13.36   | not significant |
| 6876 | PPP1R32      | 1.00 | 6.26E-01 | NA       | 21.61   | not significant |
| 6877 | TRPC3        | 1.00 | 7.89E-01 | NA       | 69.34   | not significant |
| 6878 | EXOC4        | 1.00 | 8.78E-01 | 9.52E-01 | 2574.89 | not significant |
| 6879 | MEF2A        | 1.00 | 8.88E-01 | 9.58E-01 | 2572.46 | not significant |
| 6880 | RAB15        | 1.00 | 8.64E-01 | 9.45E-01 | 1726.52 | not significant |
| 6881 | ZNF678       | 1.00 | 8.85E-01 | 9.56E-01 | 872.23  | not significant |
| 6882 | ITGB3        | 1.00 | 7.28E-01 | NA       | 38.30   | not significant |
| 6883 | ECM1         | 1.00 | 6.57E-01 | NA       | 26.00   | not significant |
| 6884 | NINJ2        | 1.00 | 8.13E-01 | 9.21E-01 | 103.29  | not significant |
| 6885 | CCDC125      | 1.00 | 8.27E-01 | 9.28E-01 | 118.88  | not significant |
| 6886 | DISP1        | 1.00 | 8.42E-01 | 9.33E-01 | 168.13  | not significant |
| 6887 | NXN          | 1.00 | 7.21E-01 | NA       | 34.95   | not significant |
| 6888 | ASPDH        | 1.00 | 7.93E-01 | NA       | 73.42   | not significant |
| 6889 | HAR1A        | 1.00 | 8.09E-01 | NA       | 70.44   | not significant |
| 6890 | MAP3K15      | 1.00 | 7.07E-01 | NA       | 33.58   | not significant |
| 6891 | FGFR4        | 1.00 | 6.25E-01 | NA       | 20.27   | not significant |
| 6892 | LOC101929125 | 1.00 | 5.18E-01 | NA       | 12.12   | not significant |
| 6893 | FRMD3        | 1.00 | 5.47E-01 | NA       | 13.46   | not significant |
| 6894 | PDCD6        | 1.00 | 8.80E-01 | 9.53E-01 | 2338.49 | not significant |
| 6895 | CREB3        | 1.00 | 8.83E-01 | 9.55E-01 | 977.45  | not significant |
| 6896 | IFT43        | 1.00 | 8.33E-01 | 9.30E-01 | 134.75  | not significant |
| 6897 | BTG3         | 1.00 | 8.82E-01 | 9.54E-01 | 1372.22 | not significant |
| 6898 | PDXDC1       | 1.00 | 8.77E-01 | 9.52E-01 | 2632.74 | not significant |
| 6899 | FAF2         | 1.00 | 8.74E-01 | 9.50E-01 | 2935.65 | not significant |
| 6900 | FAAH2        | 1.00 | 8.09E-01 | NA       | 95.93   | not significant |
| 6901 | CLCN5        | 1.00 | 6.89E-01 | NA       | 29.30   | not significant |
| 6902 | MAST1        | 1.00 | 6.90E-01 | NA       | 36.55   | not significant |
| 6903 | LOC100507577 | 1.00 | 7.52E-01 | NA       | 61.21   | not significant |
| 6904 | CCDC159      | 1.00 | 7.25E-01 | NA       | 42.01   | not significant |
| 6905 | AUTS2        | 1.00 | 7.68E-01 | NA       | 63.34   | not significant |
| 6906 | AMY2B        | 1.00 | 7.52E-01 | NA       | 50.65   | not significant |
| 6907 | TTY14        | 1.00 | 6.47E-01 | NA       | 25.06   | not significant |
| 6908 | HIST1H3H     | 1.00 | 5.78E-01 | NA       | 17.37   | not significant |
| 6909 | ACOT1        | 1.00 | 6.33E-01 | NA       | 20.15   | not significant |
| 6910 | PTCD1        | 1.00 | 5.07E-01 | NA       | 10.85   | not significant |
| 6911 | HIST1H2BN    | 1.00 | 3.17E-01 | NA       | 17.97   | not significant |
| 6912 | SLC25A10     | 1.00 | 8.80E-01 | 9.53E-01 | 1876.49 | not significant |
| 6913 | ATP5H        | 1.00 | 8.73E-01 | 9.50E-01 | 3894.57 | not significant |
| 6914 | CRYBB2P1     | 1.00 | 8.79E-01 | 9.52E-01 | 944.74  | not significant |
| 6915 | LSM14B       | 1.00 | 8.79E-01 | 9.52E-01 | 1736.14 | not significant |
| 6916 | ZNF653       | 1.00 | 8.59E-01 | 9.43E-01 | 253.06  | not significant |
| 6917 | POMGNT2      | 1.00 | 8.82E-01 | 9.55E-01 | 912.80  | not significant |
| 6918 | ANTXR2       | 1.00 | 8.23E-01 | 9.27E-01 | 121.33  | not significant |
| 6919 | GPR124       | 1.00 | 8.84E-01 | 9.56E-01 | 2279.95 | not significant |
| 6920 | FAIM         | 1.00 | 8.36E-01 | 9.31E-01 | 167.28  | not significant |
| 6921 | BSCL2        | 1.00 | 7.94E-01 | NA       | 81.04   | not significant |
| 6922 | HIST1H2BD    | 1.00 | 7.57E-01 | NA       | 58.35   | not significant |
| 6923 | PLCB3        | 1.00 | 8.74E-01 | 9.50E-01 | 484.13  | not significant |
| 6924 | S100A13      | 1.00 | 7.60E-01 | NA       | 58.17   | not significant |
| 6925 | LINC01012    | 1.00 | 6.08E-01 | NA       | 20.54   | not significant |
| 6926 | MCOLN2       | 1.00 | 6.52E-01 | NA       | 25.70   | not significant |
| 6927 | FBXW9        | 1.00 | 8.47E-01 | 9.36E-01 | 197.34  | not significant |
| 6928 | MRPS6        | 1.00 | 8.75E-01 | 9.51E-01 | 2789.57 | not significant |
| 6929 | ENDOV        | 1.00 | 8.31E-01 | 9.29E-01 | 157.19  | not significant |
| 6930 | TRMT2A       | 1.00 | 8.97E-01 | 9.61E-01 | 2559.07 | not significant |
| 6931 | DBR1         | 1.00 | 8.77E-01 | 9.52E-01 | 1374.04 | not significant |
| 6932 | RETSAT       | 1.00 | 8.78E-01 | 9.52E-01 | 764.19  | not significant |
| 6933 | FAM50A       | 1.00 | 8.78E-01 | 9.52E-01 | 757.27  | not significant |
| 6934 | RMND5B       | 1.00 | 8.18E-01 | 9.24E-01 | 412.11  | not significant |
| 6935 | ZDHHC15      | 1.00 | 8.33E-01 | 9.30E-01 | 157.05  | not significant |
| 6936 | LTBP4        | 1.00 | 8.58E-01 | 9.43E-01 | 328.51  | not significant |
| 6937 | TDRD9        | 1.00 | 6.13E-01 | NA       | 21.28   | not significant |
| 6938 | PXN-AS1      | 1.00 | 8.37E-01 | 9.31E-01 | 176.37  | not significant |
| 6939 | EIF4E3       | 1.00 | 8.69E-01 | 9.47E-01 | 418.70  | not significant |

|      |              |      |          |          |          |                 |
|------|--------------|------|----------|----------|----------|-----------------|
| 6940 | C1orf21      | 1.00 | 7.94E-01 | NA       | 84.97    | not significant |
| 6941 | RPL32P3      | 1.00 | 8.42E-01 | 9.33E-01 | 201.49   | not significant |
| 6942 | GPR126       | 1.00 | 6.53E-01 | NA       | 26.99    | not significant |
| 6943 | MNS1         | 1.00 | 7.46E-01 | NA       | 52.60    | not significant |
| 6944 | AQP4-AS1     | 1.00 | 5.44E-01 | NA       | 14.58    | not significant |
| 6945 | PCDHGB1      | 1.00 | 5.93E-01 | NA       | 18.12    | not significant |
| 6946 | SPAG4        | 1.00 | 6.58E-01 | NA       | 27.11    | not significant |
| 6947 | LRRC46       | 1.00 | 6.73E-01 | NA       | 30.07    | not significant |
| 6948 | DSCR3        | 1.00 | 9.96E-01 | 1.00E+00 | 3010.46  | not significant |
| 6949 | C9orf85      | 1.00 | 8.63E-01 | 9.44E-01 | 384.81   | not significant |
| 6950 | NUP107       | 1.00 | 8.58E-01 | 9.43E-01 | 5424.15  | not significant |
| 6951 | ING3         | 1.00 | 8.78E-01 | 9.52E-01 | 973.02   | not significant |
| 6952 | KLHL5        | 1.00 | 8.78E-01 | 9.52E-01 | 918.71   | not significant |
| 6953 | THRA         | 1.00 | 8.61E-01 | 9.43E-01 | 512.82   | not significant |
| 6954 | TLL7         | 1.00 | 7.33E-01 | NA       | 61.18    | not significant |
| 6955 | SLC41A2      | 1.00 | 7.93E-01 | 9.11E-01 | 162.62   | not significant |
| 6956 | IDH1-AS1     | 1.00 | 4.68E-01 | NA       | 10.50    | not significant |
| 6957 | GPRIN1       | 1.00 | 4.75E-01 | NA       | 11.34    | not significant |
| 6958 | CCDC121      | 1.00 | 4.97E-01 | NA       | 12.12    | not significant |
| 6959 | PRMT6        | 1.00 | 8.73E-01 | 9.50E-01 | 1340.70  | not significant |
| 6960 | ASF1A        | 1.00 | 8.67E-01 | 9.47E-01 | 2827.04  | not significant |
| 6961 | RBMS1        | 1.00 | 8.65E-01 | 9.45E-01 | 2713.69  | not significant |
| 6962 | KLHL25       | 1.00 | 8.63E-01 | 9.44E-01 | 434.80   | not significant |
| 6963 | COQ4         | 1.00 | 8.73E-01 | 9.50E-01 | 724.83   | not significant |
| 6964 | ZBTB43       | 1.00 | 8.69E-01 | 9.47E-01 | 721.69   | not significant |
| 6965 | PI4KAP2      | 1.00 | 7.94E-01 | 9.11E-01 | 159.00   | not significant |
| 6966 | HMX3         | 1.00 | 7.57E-01 | NA       | 67.43    | not significant |
| 6967 | HOMEZ        | 1.00 | 8.38E-01 | 9.31E-01 | 337.46   | not significant |
| 6968 | FMR1         | 1.00 | 8.64E-01 | 9.45E-01 | 438.06   | not significant |
| 6969 | LRRC37A2     | 1.00 | 6.78E-01 | NA       | 35.06    | not significant |
| 6970 | C11orf96     | 1.00 | 8.20E-01 | 9.25E-01 | 141.62   | not significant |
| 6971 | LMF1         | 1.00 | 8.44E-01 | 9.34E-01 | 267.27   | not significant |
| 6972 | LOC100129550 | 1.00 | 7.55E-01 | NA       | 65.22    | not significant |
| 6973 | C6orf203     | 1.00 | 7.63E-01 | NA       | 85.14    | not significant |
| 6974 | RHOV         | 1.00 | 5.12E-01 | NA       | 13.25    | not significant |
| 6975 | PIGW         | 1.00 | 6.60E-01 | NA       | 34.51    | not significant |
| 6976 | GPR157       | 1.00 | 6.71E-01 | NA       | 40.75    | not significant |
| 6977 | TMOD1        | 1.00 | 5.99E-01 | NA       | 20.36    | not significant |
| 6978 | BRICD5       | 1.00 | 6.82E-01 | 8.50E-01 | 114.32   | not significant |
| 6979 | EPHA5        | 1.00 | 6.22E-01 | NA       | 24.34    | not significant |
| 6980 | ABHD17C      | 1.00 | 3.99E-01 | NA       | 8.46     | not significant |
| 6981 | PRC1-AS1     | 1.00 | 3.99E-01 | NA       | 10.52    | not significant |
| 6982 | POT1-AS1     | 1.00 | 4.11E-01 | NA       | 8.87     | not significant |
| 6983 | MVB12A       | 1.00 | 8.63E-01 | 9.44E-01 | 458.13   | not significant |
| 6984 | LRRC42       | 1.00 | 8.68E-01 | 9.47E-01 | 1231.65  | not significant |
| 6985 | PCBP2        | 1.00 | 8.38E-01 | 9.31E-01 | 20497.99 | not significant |
| 6986 | DNAJC10      | 1.00 | 8.76E-01 | 9.52E-01 | 3853.15  | not significant |
| 6987 | LOC100506688 | 1.00 | 8.68E-01 | 9.47E-01 | 822.58   | not significant |
| 6988 | CCDC107      | 1.00 | 8.29E-01 | 9.29E-01 | 248.51   | not significant |
| 6989 | TSLP         | 1.00 | 7.71E-01 | NA       | 71.13    | not significant |
| 6990 | TTC7B        | 1.00 | 7.07E-01 | NA       | 42.42    | not significant |
| 6991 | DLGAP1-AS2   | 1.00 | 5.18E-01 | NA       | 13.94    | not significant |
| 6992 | IZUMO1       | 1.00 | 4.80E-01 | NA       | 12.17    | not significant |
| 6993 | CAPN5        | 1.00 | 6.87E-01 | NA       | 35.91    | not significant |
| 6994 | RGS18        | 1.00 | 6.86E-01 | NA       | 43.96    | not significant |
| 6995 | AGBL2        | 1.00 | 7.53E-01 | NA       | 63.98    | not significant |
| 6996 | HRH1         | 1.00 | 4.38E-01 | NA       | 10.93    | not significant |
| 6997 | TRAPPC2P1    | 1.00 | 8.05E-01 | 9.17E-01 | 127.86   | not significant |
| 6998 | SLC7A5P1     | 1.00 | 7.72E-01 | NA       | 97.58    | not significant |
| 6999 | NOTCH2NL     | 1.00 | 7.97E-01 | 9.12E-01 | 108.15   | not significant |
| 7000 | MAPK13       | 1.00 | 6.87E-01 | NA       | 40.34    | not significant |
| 7001 | SCG5         | 1.00 | 4.11E-01 | NA       | 9.76     | not significant |
| 7002 | LOC100132352 | 1.00 | 6.26E-01 | NA       | 25.78    | not significant |
| 7003 | SPOCK2       | 1.00 | 7.71E-01 | NA       | 82.34    | not significant |
| 7004 | ZNF192P1     | 1.00 | 4.48E-01 | NA       | 10.88    | not significant |
| 7005 | NTN5         | 1.00 | 4.47E-01 | NA       | 10.66    | not significant |
| 7006 | PPP1R3D      | 1.00 | 7.68E-01 | NA       | 82.69    | not significant |
| 7007 | RARRES3      | 1.00 | 8.78E-01 | 9.52E-01 | 718.62   | not significant |
| 7008 | CENPM        | 1.00 | 8.66E-01 | 9.46E-01 | 2338.98  | not significant |
| 7009 | LARP7        | 1.00 | 8.65E-01 | 9.45E-01 | 1803.67  | not significant |
| 7010 | THAP1        | 1.00 | 8.61E-01 | 9.43E-01 | 749.56   | not significant |
| 7011 | PIK3CD       | 1.00 | 8.40E-01 | 9.32E-01 | 5246.11  | not significant |
| 7012 | TBC1D9B      | 1.00 | 8.32E-01 | 9.30E-01 | 3270.63  | not significant |
| 7013 | ITGA5        | 1.00 | 8.66E-01 | 9.45E-01 | 3243.18  | not significant |
| 7014 | SCRN3        | 1.00 | 8.27E-01 | 9.28E-01 | 457.50   | not significant |
| 7015 | ZFAT         | 1.00 | 8.60E-01 | 9.43E-01 | 452.20   | not significant |
| 7016 | ATG9B        | 1.00 | 7.03E-01 | NA       | 52.09    | not significant |
| 7017 | CA13         | 1.00 | 6.67E-01 | NA       | 33.02    | not significant |
| 7018 | SENCR        | 1.00 | 4.40E-01 | NA       | 11.58    | not significant |
| 7019 | ZNF573       | 1.00 | 7.77E-01 | 9.02E-01 | 102.73   | not significant |
| 7020 | GRIN2D       | 1.00 | 4.20E-01 | NA       | 10.41    | not significant |
| 7021 | VEG          | 1.00 | 4.99E-01 | NA       | 13.67    | not significant |
| 7022 | STAG3L5P     | 1.00 | 9.86E-01 | NA       | 23.35    | not significant |
| 7023 | TALDO1       | 1.00 | 8.57E-01 | 9.42E-01 | 4712.11  | not significant |
| 7024 | LOC101927181 | 1.00 | 8.37E-01 | 9.31E-01 | 285.95   | not significant |
| 7025 | CDC16        | 1.00 | 8.64E-01 | 9.45E-01 | 2096.62  | not significant |
| 7026 | KIAA0753     | 1.00 | 8.62E-01 | 9.44E-01 | 844.75   | not significant |
| 7027 | PNPLA6       | 1.00 | 8.63E-01 | 9.45E-01 | 2422.44  | not significant |

|      |              |      |          |          |          |                 |
|------|--------------|------|----------|----------|----------|-----------------|
| 7028 | MFSD6        | 1.00 | 8.57E-01 | 9.42E-01 | 3612.73  | not significant |
| 7029 | MTSS1L       | 1.00 | 8.65E-01 | 9.45E-01 | 945.94   | not significant |
| 7030 | CYSTM1       | 1.00 | 8.00E-01 | 9.14E-01 | 199.52   | not significant |
| 7031 | TSPYL2       | 1.00 | 7.94E-01 | 9.11E-01 | 105.62   | not significant |
| 7032 | PIK3C2B      | 1.00 | 8.64E-01 | 9.45E-01 | 1659.31  | not significant |
| 7033 | LRBA         | 1.00 | 8.64E-01 | 9.45E-01 | 2895.33  | not significant |
| 7034 | RCN3         | 1.00 | 7.34E-01 | NA       | 63.34    | not significant |
| 7035 | SAT2         | 1.00 | 7.44E-01 | NA       | 65.64    | not significant |
| 7036 | ABHD11       | 1.00 | 7.59E-01 | NA       | 75.62    | not significant |
| 7037 | RAB30-AS1    | 1.00 | 7.61E-01 | NA       | 80.23    | not significant |
| 7038 | LINC00959    | 1.00 | 7.56E-01 | NA       | 82.49    | not significant |
| 7039 | PLXNB3       | 1.00 | 5.40E-01 | NA       | 17.22    | not significant |
| 7040 | KHDC1        | 1.00 | 7.89E-01 | 9.09E-01 | 118.19   | not significant |
| 7041 | HBEGF        | 1.00 | 5.73E-01 | NA       | 21.67    | not significant |
| 7042 | LLGL2        | 1.00 | 6.95E-01 | NA       | 44.08    | not significant |
| 7043 | CPB2-AS1     | 1.00 | 5.89E-01 | NA       | 23.31    | not significant |
| 7044 | ZNF85        | 1.00 | 6.78E-01 | NA       | 44.22    | not significant |
| 7045 | C11orf65     | 1.00 | 3.59E-01 | NA       | 8.30     | not significant |
| 7046 | LY6G5B       | 1.00 | 4.60E-01 | NA       | 12.47    | not significant |
| 7047 | ZNF26        | 1.00 | 7.23E-01 | NA       | 56.31    | not significant |
| 7048 | TMEM214      | 1.00 | 8.56E-01 | 9.41E-01 | 1909.15  | not significant |
| 7049 | TBC1D31      | 1.00 | 8.64E-01 | 9.45E-01 | 958.15   | not significant |
| 7050 | SOS2         | 1.00 | 8.60E-01 | 9.43E-01 | 1360.54  | not significant |
| 7051 | SBNO2        | 1.00 | 8.38E-01 | 9.31E-01 | 1731.81  | not significant |
| 7052 | ANKFY1       | 1.00 | 8.57E-01 | 9.42E-01 | 3687.22  | not significant |
| 7053 | FAN1         | 1.00 | 8.60E-01 | 9.43E-01 | 1565.49  | not significant |
| 7054 | LIPT1        | 1.00 | 8.25E-01 | 9.27E-01 | 207.44   | not significant |
| 7055 | ZNF513       | 1.00 | 8.65E-01 | 9.45E-01 | 340.61   | not significant |
| 7056 | ZBED8        | 1.00 | 7.87E-01 | 9.08E-01 | 111.61   | not significant |
| 7057 | MICB         | 1.00 | 8.27E-01 | 9.28E-01 | 210.15   | not significant |
| 7058 | PCBP1-AS1    | 1.00 | 8.40E-01 | 9.32E-01 | 266.77   | not significant |
| 7059 | TMX4         | 1.00 | 8.20E-01 | 9.25E-01 | 168.50   | not significant |
| 7060 | NME2         | 1.00 | 7.65E-01 | NA       | 98.12    | not significant |
| 7061 | ASB2         | 1.00 | 6.83E-01 | NA       | 42.44    | not significant |
| 7062 | TEN1-CDK3    | 1.00 | 6.81E-01 | NA       | 44.24    | not significant |
| 7063 | BSN          | 1.00 | 6.56E-01 | NA       | 34.58    | not significant |
| 7064 | LEPR         | 1.00 | 7.02E-01 | NA       | 50.94    | not significant |
| 7065 | DARS-AS1     | 1.00 | 1.14E-01 | 3.34E-01 | 2222.59  | not significant |
| 7066 | FBXO32       | 1.00 | 8.01E-01 | 9.14E-01 | 132.59   | not significant |
| 7067 | ST7          | 1.00 | 5.14E-01 | NA       | 15.55    | not significant |
| 7068 | CYP4F22      | 1.00 | 4.26E-01 | NA       | 14.05    | not significant |
| 7069 | PER3         | 1.00 | 4.34E-01 | NA       | 11.93    | not significant |
| 7070 | C11orf84     | 1.00 | 8.52E-01 | 9.39E-01 | 3167.12  | not significant |
| 7071 | UNG          | 1.00 | 8.37E-01 | 9.31E-01 | 8199.47  | not significant |
| 7072 | ARRDC2       | 1.00 | 8.48E-01 | 9.36E-01 | 589.19   | not significant |
| 7073 | KDM4B        | 1.00 | 8.59E-01 | 9.43E-01 | 1332.80  | not significant |
| 7074 | FAM103A1     | 1.00 | 8.44E-01 | 9.34E-01 | 422.76   | not significant |
| 7075 | LYRM9        | 1.00 | 5.58E-01 | NA       | 22.46    | not significant |
| 7076 | MYLK4        | 1.00 | 4.13E-01 | NA       | 32.33    | not significant |
| 7077 | BCL2L15      | 1.00 | 5.52E-01 | NA       | 20.10    | not significant |
| 7078 | TRIM66       | 1.00 | 7.29E-01 | 8.76E-01 | 313.76   | not significant |
| 7079 | LINC00239    | 1.00 | 3.71E-01 | NA       | 9.73     | not significant |
| 7080 | NUTM2D       | 1.00 | 5.89E-01 | NA       | 24.16    | not significant |
| 7081 | ALG1L2       | 1.00 | 3.93E-01 | NA       | 11.10    | not significant |
| 7082 | TRIB1        | 1.00 | 5.11E-01 | NA       | 17.79    | not significant |
| 7083 | C7orf73      | 1.00 | 8.65E-01 | 9.45E-01 | 2329.85  | not significant |
| 7084 | VASP         | 1.00 | 8.59E-01 | 9.43E-01 | 2185.99  | not significant |
| 7085 | TRIM33       | 1.00 | 8.49E-01 | 9.36E-01 | 3757.39  | not significant |
| 7086 | ABT1         | 1.00 | 8.37E-01 | 9.31E-01 | 317.08   | not significant |
| 7087 | NPIPA1       | 1.00 | 7.39E-01 | NA       | 72.85    | not significant |
| 7088 | C2CD2        | 1.00 | 8.13E-01 | 9.21E-01 | 193.04   | not significant |
| 7089 | CPT2         | 1.00 | 8.48E-01 | 9.36E-01 | 621.27   | not significant |
| 7090 | ZNF34        | 1.00 | 7.62E-01 | NA       | 95.09    | not significant |
| 7091 | LOC389705    | 1.00 | 5.37E-01 | NA       | 19.82    | not significant |
| 7092 | SYNE4        | 1.00 | 5.97E-01 | NA       | 27.30    | not significant |
| 7093 | MC1R         | 1.00 | 5.24E-01 | NA       | 17.59    | not significant |
| 7094 | LOC440028    | 1.00 | 5.56E-01 | NA       | 22.51    | not significant |
| 7095 | LCP1         | 1.00 | 8.28E-01 | 9.28E-01 | 36579.71 | not significant |
| 7096 | EXOSC6       | 1.00 | 8.55E-01 | 9.41E-01 | 1061.77  | not significant |
| 7097 | FLYWCH2      | 1.00 | 8.49E-01 | 9.37E-01 | 662.07   | not significant |
| 7098 | DNAJC13      | 1.00 | 8.46E-01 | 9.35E-01 | 3038.53  | not significant |
| 7099 | PEX6         | 1.00 | 8.35E-01 | 9.31E-01 | 440.86   | not significant |
| 7100 | MINPP1       | 1.00 | 8.54E-01 | 9.40E-01 | 1216.13  | not significant |
| 7101 | POMT2        | 1.00 | 8.37E-01 | 9.31E-01 | 629.38   | not significant |
| 7102 | KIAA1586     | 1.00 | 8.19E-01 | 9.24E-01 | 565.01   | not significant |
| 7103 | ZMYM5        | 1.00 | 8.48E-01 | 9.36E-01 | 687.81   | not significant |
| 7104 | FAM189A1     | 1.00 | 5.59E-01 | NA       | 24.09    | not significant |
| 7105 | LOC102724467 | 1.00 | 5.34E-01 | NA       | 19.95    | not significant |
| 7106 | DGCR11       | 1.00 | 5.53E-01 | NA       | 21.53    | not significant |
| 7107 | ZFP2         | 1.00 | 7.12E-01 | NA       | 60.39    | not significant |
| 7108 | AVL9         | 1.00 | 8.46E-01 | 9.36E-01 | 676.77   | not significant |
| 7109 | ZNF182       | 1.00 | 6.59E-01 | NA       | 39.79    | not significant |
| 7110 | LDLRAP1      | 1.00 | 5.71E-01 | NA       | 24.01    | not significant |
| 7111 | GP5          | 1.00 | 5.40E-01 | NA       | 20.74    | not significant |
| 7112 | TMEFF1       | 1.00 | 5.49E-01 | NA       | 20.52    | not significant |
| 7113 | SARNP        | 1.00 | 8.52E-01 | 9.38E-01 | 2378.44  | not significant |
| 7114 | C9orf89      | 1.00 | 8.28E-01 | 9.28E-01 | 338.03   | not significant |
| 7115 | MED13L       | 1.00 | 8.47E-01 | 9.36E-01 | 6045.02  | not significant |

|      |              |      |          |          |          |                 |
|------|--------------|------|----------|----------|----------|-----------------|
| 7116 | ORC2         | 1.00 | 8.48E-01 | 9.36E-01 | 2067.46  | not significant |
| 7117 | TMED7        | 1.00 | 8.45E-01 | 9.35E-01 | 1903.02  | not significant |
| 7118 | PSTPIP2      | 1.00 | 8.25E-01 | 9.27E-01 | 277.06   | not significant |
| 7119 | PDF          | 1.00 | 8.16E-01 | 9.22E-01 | 247.27   | not significant |
| 7120 | NEK6         | 1.00 | 8.36E-01 | 9.31E-01 | 402.33   | not significant |
| 7121 | SERPINH1     | 1.00 | 7.95E-01 | 9.12E-01 | 159.99   | not significant |
| 7122 | VANGL2       | 1.00 | 7.86E-01 | 9.08E-01 | 147.09   | not significant |
| 7123 | MCF2         | 1.00 | 6.72E-01 | NA       | 44.65    | not significant |
| 7124 | FRMD6        | 1.00 | 6.80E-01 | NA       | 48.65    | not significant |
| 7125 | ERI3-IT1     | 1.00 | 4.54E-01 | NA       | 13.70    | not significant |
| 7126 | IER5L        | 1.00 | 5.86E-01 | NA       | 28.39    | not significant |
| 7127 | CHKB         | 1.00 | 4.12E-01 | NA       | 12.17    | not significant |
| 7128 | ALDH9A1      | 1.00 | 8.51E-01 | 9.37E-01 | 2207.07  | not significant |
| 7129 | SIRT7        | 1.00 | 8.48E-01 | 9.36E-01 | 979.14   | not significant |
| 7130 | STRADA       | 1.00 | 8.51E-01 | 9.38E-01 | 1809.30  | not significant |
| 7131 | MINOS1       | 1.00 | 8.51E-01 | 9.37E-01 | 1001.03  | not significant |
| 7132 | VPS4A        | 1.00 | 8.37E-01 | 9.31E-01 | 3292.61  | not significant |
| 7133 | ATP11B       | 1.00 | 8.43E-01 | 9.33E-01 | 6749.07  | not significant |
| 7134 | PTPN22       | 1.00 | 8.35E-01 | 9.31E-01 | 816.08   | not significant |
| 7135 | LOC100133315 | 1.00 | 7.36E-01 | NA       | 79.10    | not significant |
| 7136 | PEX11B       | 1.00 | 7.49E-01 | NA       | 94.47    | not significant |
| 7137 | HPGD         | 1.00 | 7.58E-01 | 8.91E-01 | 101.50   | not significant |
| 7138 | RYR2         | 1.00 | 7.00E-01 | NA       | 56.73    | not significant |
| 7139 | SUGT1P1      | 1.00 | 6.48E-01 | NA       | 38.95    | not significant |
| 7140 | FKBP1AP1     | 1.00 | 6.57E-01 | NA       | 43.14    | not significant |
| 7141 | ERIC6-AS1    | 1.00 | 5.27E-01 | NA       | 20.54    | not significant |
| 7142 | DPEP1        | 1.00 | 5.13E-01 | NA       | 20.45    | not significant |
| 7143 | HEPACAM      | 1.00 | 6.20E-01 | NA       | 36.47    | not significant |
| 7144 | MED8         | 1.00 | 8.46E-01 | 9.35E-01 | 1160.98  | not significant |
| 7145 | C7orf26      | 1.00 | 8.39E-01 | 9.32E-01 | 1932.69  | not significant |
| 7146 | TBC1D7       | 1.00 | 8.19E-01 | 9.24E-01 | 553.75   | not significant |
| 7147 | TP53RK       | 1.00 | 8.28E-01 | 9.28E-01 | 1791.64  | not significant |
| 7148 | SRPR         | 1.00 | 7.81E-01 | 9.05E-01 | 7405.31  | not significant |
| 7149 | PI4K2A       | 1.00 | 8.41E-01 | 9.32E-01 | 1186.77  | not significant |
| 7150 | CBL          | 1.00 | 8.39E-01 | 9.31E-01 | 4858.14  | not significant |
| 7151 | FAM185A      | 1.00 | 7.92E-01 | 9.11E-01 | 166.19   | not significant |
| 7152 | ZC3H12B      | 1.00 | 7.92E-01 | 9.11E-01 | 155.11   | not significant |
| 7153 | ZNF418       | 1.00 | 8.08E-01 | 9.18E-01 | 220.75   | not significant |
| 7154 | POLG2        | 1.00 | 7.43E-01 | 8.84E-01 | 172.65   | not significant |
| 7155 | TNFSF8       | 1.00 | 7.74E-01 | 9.00E-01 | 127.18   | not significant |
| 7156 | TUSC2        | 1.00 | 7.94E-01 | 9.11E-01 | 189.81   | not significant |
| 7157 | FMNL2        | 1.00 | 7.91E-01 | 9.10E-01 | 165.10   | not significant |
| 7158 | DUSP28       | 1.00 | 7.74E-01 | 9.00E-01 | 129.04   | not significant |
| 7159 | C2orf15      | 1.00 | 5.50E-01 | NA       | 23.04    | not significant |
| 7160 | LINC01222    | 1.00 | 4.14E-01 | NA       | 13.55    | not significant |
| 7161 | AP2S1        | 1.00 | 8.37E-01 | 9.31E-01 | 3247.13  | not significant |
| 7162 | ICT1         | 1.00 | 8.39E-01 | 9.32E-01 | 1259.69  | not significant |
| 7163 | C12orf73     | 1.00 | 8.35E-01 | 9.31E-01 | 629.33   | not significant |
| 7164 | NHLRC3       | 1.00 | 8.40E-01 | 9.32E-01 | 1058.64  | not significant |
| 7165 | TNK2         | 1.00 | 8.38E-01 | 9.31E-01 | 1526.28  | not significant |
| 7166 | ERLIN1       | 1.00 | 8.40E-01 | 9.32E-01 | 1745.25  | not significant |
| 7167 | GALM         | 1.00 | 8.40E-01 | 9.32E-01 | 948.97   | not significant |
| 7168 | UGCG         | 1.00 | 8.12E-01 | 9.20E-01 | 526.34   | not significant |
| 7169 | PDGFA        | 1.00 | 6.40E-01 | NA       | 45.19    | not significant |
| 7170 | KIAA1467     | 1.00 | 8.06E-01 | 9.17E-01 | 220.78   | not significant |
| 7171 | CD99L2       | 1.00 | 7.98E-01 | 9.12E-01 | 205.84   | not significant |
| 7172 | TCEANC       | 1.00 | 7.46E-01 | 8.85E-01 | 102.66   | not significant |
| 7173 | DNAJC27      | 1.00 | 8.09E-01 | 9.18E-01 | 290.94   | not significant |
| 7174 | LOC100506136 | 1.00 | 4.44E-01 | NA       | 14.98    | not significant |
| 7175 | NUDT7        | 1.00 | 6.61E-01 | NA       | 48.46    | not significant |
| 7176 | ZNF70        | 1.00 | 7.94E-01 | 9.11E-01 | 224.84   | not significant |
| 7177 | HAGHL        | 1.00 | 5.04E-01 | NA       | 19.35    | not significant |
| 7178 | SYCE1L       | 1.00 | 4.71E-01 | NA       | 16.65    | not significant |
| 7179 | TIGD3        | 1.00 | 6.23E-01 | NA       | 37.59    | not significant |
| 7180 | NR1H2        | 1.00 | 8.37E-01 | 9.31E-01 | 2082.47  | not significant |
| 7181 | PHKG2        | 1.00 | 8.47E-01 | 9.36E-01 | 1053.75  | not significant |
| 7182 | YIF1A        | 1.00 | 8.41E-01 | 9.32E-01 | 1522.25  | not significant |
| 7183 | ZNF680       | 1.00 | 8.36E-01 | 9.31E-01 | 866.60   | not significant |
| 7184 | GIN1         | 1.00 | 6.51E-01 | NA       | 49.08    | not significant |
| 7185 | NUTM2B-AS1   | 1.00 | 8.21E-01 | 9.25E-01 | 340.75   | not significant |
| 7186 | LOC100131655 | 1.00 | 6.18E-01 | NA       | 36.97    | not significant |
| 7187 | APBB3        | 1.00 | 8.11E-01 | 9.20E-01 | 323.26   | not significant |
| 7188 | TSPAN2       | 1.00 | 7.20E-01 | NA       | 77.84    | not significant |
| 7189 | LOC101929767 | 1.00 | 7.00E-01 | NA       | 70.25    | not significant |
| 7190 | ZNF540       | 1.00 | 6.79E-01 | NA       | 74.11    | not significant |
| 7191 | RTP5         | 1.00 | 4.66E-01 | NA       | 21.27    | not significant |
| 7192 | SPON2        | 1.00 | 6.34E-01 | NA       | 41.83    | not significant |
| 7193 | VSIG10L      | 1.00 | 6.24E-01 | NA       | 39.18    | not significant |
| 7194 | LINC01337    | 1.00 | 2.74E-01 | NA       | 8.57     | not significant |
| 7195 | TCP11L2      | 1.00 | 3.81E-01 | NA       | 11.67    | not significant |
| 7196 | SEPT7-AS1    | 1.00 | 2.90E-01 | NA       | 8.26     | not significant |
| 7197 | CD81-AS1     | 1.00 | 2.29E-01 | NA       | 7.59     | not significant |
| 7198 | ACIN1        | 1.00 | 8.89E-01 | 9.58E-01 | 10222.21 | not significant |
| 7199 | LAPTM5       | 1.00 | 8.10E-01 | 9.19E-01 | 14245.18 | not significant |
| 7200 | NUDT9        | 1.00 | 8.39E-01 | 9.31E-01 | 967.34   | not significant |
| 7201 | MCEE         | 1.00 | 7.85E-01 | 9.07E-01 | 118.83   | not significant |
| 7202 | RPS14        | 1.00 | 8.34E-01 | 9.30E-01 | 12666.99 | not significant |
| 7203 | SCAI         | 1.00 | 8.37E-01 | 9.31E-01 | 1291.32  | not significant |

|      |              |      |          |          |         |                 |
|------|--------------|------|----------|----------|---------|-----------------|
| 7204 | HIST1H2BG    | 1.00 | 5.33E-01 | NA       | 23.78   | not significant |
| 7205 | SH3D21       | 1.00 | 5.45E-01 | NA       | 25.55   | not significant |
| 7206 | TNFAIP1      | 1.00 | 7.48E-01 | 8.85E-01 | 110.47  | not significant |
| 7207 | C22orf34     | 1.00 | 7.84E-01 | 9.07E-01 | 182.85  | not significant |
| 7208 | F2RL1        | 1.00 | 6.64E-01 | NA       | 56.00   | not significant |
| 7209 | DYNLT3       | 1.00 | 5.55E-01 | NA       | 27.22   | not significant |
| 7210 | LOC100049716 | 1.00 | 4.80E-01 | NA       | 18.13   | not significant |
| 7211 | SLC35D2      | 1.00 | 4.19E-01 | NA       | 15.00   | not significant |
| 7212 | TMED10P1     | 1.00 | 4.76E-01 | NA       | 18.76   | not significant |
| 7213 | DAK          | 1.00 | 8.34E-01 | 9.30E-01 | 431.19  | not significant |
| 7214 | MMADHC       | 1.00 | 8.39E-01 | 9.31E-01 | 2265.51 | not significant |
| 7215 | TMA16        | 1.00 | 8.31E-01 | 9.29E-01 | 1513.07 | not significant |
| 7216 | SEC23B       | 1.00 | 8.37E-01 | 9.31E-01 | 3519.29 | not significant |
| 7217 | ZCCHC11      | 1.00 | 8.25E-01 | 9.27E-01 | 3859.41 | not significant |
| 7218 | LPIN1        | 1.00 | 8.15E-01 | 9.22E-01 | 4782.01 | not significant |
| 7219 | CORO2A       | 1.00 | 8.37E-01 | 9.31E-01 | 1073.18 | not significant |
| 7220 | TMEM116      | 1.00 | 7.92E-01 | 9.11E-01 | 230.21  | not significant |
| 7221 | VPS33B       | 1.00 | 8.28E-01 | 9.28E-01 | 511.80  | not significant |
| 7222 | SHPK         | 1.00 | 8.27E-01 | 9.28E-01 | 777.02  | not significant |
| 7223 | RGS9         | 1.00 | 7.33E-01 | NA       | 94.22   | not significant |
| 7224 | PTENP1       | 1.00 | 6.82E-01 | NA       | 61.42   | not significant |
| 7225 | SWT1         | 1.00 | 7.50E-01 | 8.87E-01 | 124.18  | not significant |
| 7226 | C2orf81      | 1.00 | 6.45E-01 | NA       | 50.83   | not significant |
| 7227 | KLHL36       | 1.00 | 7.69E-01 | 8.98E-01 | 170.55  | not significant |
| 7228 | LOC644656    | 1.00 | 6.58E-01 | NA       | 51.34   | not significant |
| 7229 | SKP1P2       | 1.00 | 2.91E-01 | NA       | 10.30   | not significant |
| 7230 | TMEM56-RWDD3 | 1.00 | 2.78E-01 | NA       | 8.56    | not significant |
| 7231 | MATN4        | 1.00 | 2.61E-01 | NA       | 8.06    | not significant |
| 7232 | RPSAP9       | 1.00 | 4.48E-01 | NA       | 18.51   | not significant |
| 7233 | SELP         | 1.00 | 4.26E-01 | NA       | 16.80   | not significant |
| 7234 | PTPN2        | 1.00 | 8.30E-01 | 9.29E-01 | 2158.35 | not significant |
| 7235 | SNAPIN       | 1.00 | 8.28E-01 | 9.28E-01 | 1030.35 | not significant |
| 7236 | SHC1         | 1.00 | 8.38E-01 | 9.31E-01 | 2244.82 | not significant |
| 7237 | TOP3A        | 1.00 | 8.30E-01 | 9.29E-01 | 3325.12 | not significant |
| 7238 | ARNTL2       | 1.00 | 8.06E-01 | 9.17E-01 | 1703.61 | not significant |
| 7239 | KDM5C        | 1.00 | 8.30E-01 | 9.29E-01 | 1557.36 | not significant |
| 7240 | CPT1B        | 1.00 | 6.69E-01 | NA       | 57.37   | not significant |
| 7241 | SSH1         | 1.00 | 7.52E-01 | 8.88E-01 | 2133.55 | not significant |
| 7242 | CELF5        | 1.00 | 4.09E-01 | NA       | 14.93   | not significant |
| 7243 | LINC00476    | 1.00 | 7.57E-01 | 8.91E-01 | 138.67  | not significant |
| 7244 | HCG18        | 1.00 | 6.62E-01 | NA       | 54.24   | not significant |
| 7245 | HIST1H2BJ    | 1.00 | 4.69E-01 | NA       | 19.26   | not significant |
| 7246 | C14orf79     | 1.00 | 5.00E-01 | NA       | 22.49   | not significant |
| 7247 | MFSD4        | 1.00 | 4.35E-01 | NA       | 17.01   | not significant |
| 7248 | LGALS4       | 1.00 | 1.89E-01 | NA       | 7.26    | not significant |
| 7249 | CDC37        | 1.00 | 7.95E-01 | 9.12E-01 | 8780.71 | not significant |
| 7250 | ETV6         | 1.00 | 8.20E-01 | 9.25E-01 | 2383.45 | not significant |
| 7251 | ERLIN2       | 1.00 | 8.29E-01 | 9.28E-01 | 1736.59 | not significant |
| 7252 | PI4KA        | 1.00 | 8.21E-01 | 9.25E-01 | 5116.99 | not significant |
| 7253 | BBS10        | 1.00 | 8.24E-01 | 9.27E-01 | 628.76  | not significant |
| 7254 | FSTL3        | 1.00 | 7.65E-01 | 8.95E-01 | 155.16  | not significant |
| 7255 | BCDIN3D      | 1.00 | 7.93E-01 | 9.11E-01 | 254.46  | not significant |
| 7256 | HIST1H1E     | 1.00 | 6.81E-01 | NA       | 82.31   | not significant |
| 7257 | PAN3-AS1     | 1.00 | 6.96E-01 | NA       | 70.46   | not significant |
| 7258 | SPIB         | 1.00 | 5.99E-01 | NA       | 38.50   | not significant |
| 7259 | ZNF213-AS1   | 1.00 | 7.03E-01 | NA       | 78.39   | not significant |
| 7260 | EXPH5        | 1.00 | 5.99E-01 | NA       | 40.35   | not significant |
| 7261 | RNASEK       | 1.00 | 5.71E-01 | NA       | 31.23   | not significant |
| 7262 | PDK3         | 1.00 | 9.47E-01 | 9.80E-01 | 1275.18 | not significant |
| 7263 | SRGN         | 1.00 | 8.06E-01 | 9.17E-01 | 410.66  | not significant |
| 7264 | MKL1         | 1.00 | 8.21E-01 | 9.25E-01 | 2069.50 | not significant |
| 7265 | RFT1         | 1.00 | 8.24E-01 | 9.27E-01 | 1650.07 | not significant |
| 7266 | CNEP1R1      | 1.00 | 8.17E-01 | 9.24E-01 | 803.29  | not significant |
| 7267 | ZRANB3       | 1.00 | 8.08E-01 | 9.18E-01 | 328.67  | not significant |
| 7268 | WHAMM        | 1.00 | 8.11E-01 | 9.20E-01 | 400.30  | not significant |
| 7269 | SLC9A5       | 1.00 | 4.99E-01 | NA       | 22.95   | not significant |
| 7270 | LAMP3        | 1.00 | 8.14E-01 | 9.21E-01 | 270.12  | not significant |
| 7271 | RAET1K       | 1.00 | 7.47E-01 | 8.85E-01 | 137.32  | not significant |
| 7272 | ASH1L-AS1    | 1.00 | 5.89E-01 | NA       | 37.80   | not significant |
| 7273 | RRAS         | 1.00 | 6.66E-01 | NA       | 63.51   | not significant |
| 7274 | NFIB         | 1.00 | 3.06E-01 | NA       | 11.14   | not significant |
| 7275 | COL9A3       | 1.00 | 5.72E-01 | NA       | 33.70   | not significant |
| 7276 | ZBTB18       | 1.00 | 8.32E-01 | 9.30E-01 | 1506.01 | not significant |
| 7277 | ATP9B        | 1.00 | 7.53E-01 | 8.89E-01 | 751.66  | not significant |
| 7278 | VPS13A       | 1.00 | 7.87E-01 | 9.08E-01 | 3451.66 | not significant |
| 7279 | ANKRD18DP    | 1.00 | 6.48E-01 | NA       | 59.43   | not significant |
| 7280 | LOC100133091 | 1.00 | 6.90E-01 | 8.54E-01 | 106.01  | not significant |
| 7281 | ZNF724P      | 1.00 | 6.71E-01 | NA       | 70.50   | not significant |
| 7282 | DEPDC4       | 1.00 | 5.27E-01 | NA       | 28.14   | not significant |
| 7283 | TSGA10       | 1.00 | 6.62E-01 | NA       | 64.03   | not significant |
| 7284 | STON1        | 1.00 | 3.78E-01 | NA       | 15.18   | not significant |
| 7285 | LRRC43       | 1.00 | 2.20E-01 | NA       | 7.80    | not significant |
| 7286 | AMDHD1       | 1.00 | 3.58E-01 | NA       | 13.32   | not significant |
| 7287 | CCDC28B      | 1.00 | 8.19E-01 | 9.24E-01 | 674.49  | not significant |
| 7288 | COX5B        | 1.00 | 8.14E-01 | 9.22E-01 | 3272.09 | not significant |
| 7289 | SLC35A1      | 1.00 | 7.86E-01 | 9.08E-01 | 542.47  | not significant |
| 7290 | POT1         | 1.00 | 8.19E-01 | 9.24E-01 | 2100.66 | not significant |
| 7291 | EAPP         | 1.00 | 8.23E-01 | 9.27E-01 | 1041.69 | not significant |

|      |                 |      |          |          |          |                 |
|------|-----------------|------|----------|----------|----------|-----------------|
| 7292 | SARS2           | 1.00 | 8.18E-01 | 9.24E-01 | 858.64   | not significant |
| 7293 | CBFA2T2         | 1.00 | 8.19E-01 | 9.24E-01 | 1735.27  | not significant |
| 7294 | SLX4            | 1.00 | 8.16E-01 | 9.22E-01 | 797.72   | not significant |
| 7295 | ITSN1           | 1.00 | 8.16E-01 | 9.22E-01 | 713.12   | not significant |
| 7296 | FBXO36          | 1.00 | 6.42E-01 | NA       | 58.40    | not significant |
| 7297 | HABP4           | 1.00 | 7.00E-01 | NA       | 94.20    | not significant |
| 7298 | YY2             | 1.00 | 7.38E-01 | 8.80E-01 | 125.83   | not significant |
| 7299 | NKIRAS2         | 1.00 | 7.56E-01 | 8.90E-01 | 231.59   | not significant |
| 7300 | TBC1D3P1-DHX40F | 1.00 | 5.27E-01 | NA       | 28.13    | not significant |
| 7301 | NRSN2           | 1.00 | 5.86E-01 | NA       | 40.20    | not significant |
| 7302 | MURC            | 1.00 | 5.91E-01 | NA       | 39.94    | not significant |
| 7303 | FAM228B         | 1.00 | 5.91E-01 | NA       | 45.89    | not significant |
| 7304 | SCARNA2         | 1.00 | 2.68E-01 | NA       | 10.41    | not significant |
| 7305 | LOC101927051    | 1.00 | 2.77E-01 | NA       | 10.28    | not significant |
| 7306 | ADHFE1          | 1.00 | 3.72E-01 | NA       | 14.33    | not significant |
| 7307 | LINC00260       | 1.00 | 3.55E-01 | NA       | 13.58    | not significant |
| 7308 | LKAAEAR1        | 1.00 | 2.21E-01 | NA       | 8.70     | not significant |
| 7309 | ZMYND19         | 1.00 | 8.19E-01 | 9.24E-01 | 1052.87  | not significant |
| 7310 | MRFAP1L1        | 1.00 | 8.15E-01 | 9.22E-01 | 2195.95  | not significant |
| 7311 | TFG             | 1.00 | 8.12E-01 | 9.21E-01 | 2400.98  | not significant |
| 7312 | ANAPC4          | 1.00 | 8.19E-01 | 9.24E-01 | 1296.10  | not significant |
| 7313 | GPS2            | 1.00 | 8.23E-01 | 9.27E-01 | 2244.19  | not significant |
| 7314 | ATF2            | 1.00 | 7.95E-01 | 9.12E-01 | 4181.85  | not significant |
| 7315 | UBE2D4          | 1.00 | 7.74E-01 | 9.00E-01 | 539.05   | not significant |
| 7316 | WDR44           | 1.00 | 8.07E-01 | 9.17E-01 | 982.27   | not significant |
| 7317 | RCAN3           | 1.00 | 8.12E-01 | 9.21E-01 | 723.82   | not significant |
| 7318 | THAP9           | 1.00 | 7.89E-01 | 9.09E-01 | 276.77   | not significant |
| 7319 | GABBR1          | 1.00 | 6.49E-01 | NA       | 65.17    | not significant |
| 7320 | GRAMD1C         | 1.00 | 6.82E-01 | NA       | 76.74    | not significant |
| 7321 | BEND6           | 1.00 | 2.88E-01 | NA       | 10.86    | not significant |
| 7322 | MANEA-AS1       | 1.00 | 5.31E-01 | NA       | 32.25    | not significant |
| 7323 | MIR210HG        | 1.00 | 6.08E-01 | NA       | 47.31    | not significant |
| 7324 | OCLM            | 1.00 | 4.23E-01 | NA       | 19.47    | not significant |
| 7325 | S100B           | 1.00 | 1.98E-01 | NA       | 7.95     | not significant |
| 7326 | RND1            | 1.00 | 3.38E-01 | NA       | 34.11    | not significant |
| 7327 | RNF130          | 1.00 | 8.06E-01 | 9.17E-01 | 1933.62  | not significant |
| 7328 | NDUFS7          | 1.00 | 8.63E-01 | 9.44E-01 | 1638.63  | not significant |
| 7329 | STK11           | 1.00 | 8.29E-01 | 9.28E-01 | 2462.40  | not significant |
| 7330 | ZNF25           | 1.00 | 7.36E-01 | 8.79E-01 | 218.02   | not significant |
| 7331 | CARKD           | 1.00 | 8.13E-01 | 9.21E-01 | 1286.51  | not significant |
| 7332 | ARHGEF19        | 1.00 | 7.70E-01 | 8.98E-01 | 232.94   | not significant |
| 7333 | MFSD12          | 1.00 | 8.30E-01 | 9.29E-01 | 1188.13  | not significant |
| 7334 | FUNDC1          | 1.00 | 7.82E-01 | 9.05E-01 | 554.32   | not significant |
| 7335 | TMIGD2          | 1.00 | 7.34E-01 | 8.78E-01 | 137.42   | not significant |
| 7336 | TESK2           | 1.00 | 7.52E-01 | 8.88E-01 | 164.45   | not significant |
| 7337 | LOC642236       | 1.00 | 5.06E-01 | NA       | 30.51    | not significant |
| 7338 | ZSCAN4          | 1.00 | 2.41E-01 | NA       | 8.95     | not significant |
| 7339 | ARIH2OS         | 1.00 | 5.87E-01 | NA       | 42.71    | not significant |
| 7340 | ARTN            | 1.00 | 3.67E-01 | NA       | 14.76    | not significant |
| 7341 | RNF213          | 1.00 | 8.31E-01 | 9.29E-01 | 26434.06 | not significant |
| 7342 | CLPTM1          | 1.00 | 8.04E-01 | 9.16E-01 | 3727.60  | not significant |
| 7343 | HAUS6           | 1.00 | 8.31E-01 | 9.29E-01 | 3732.69  | not significant |
| 7344 | IFNAR2          | 1.00 | 7.90E-01 | 9.09E-01 | 1942.77  | not significant |
| 7345 | SLFN12          | 1.00 | 8.05E-01 | 9.17E-01 | 618.90   | not significant |
| 7346 | STX4            | 1.00 | 8.07E-01 | 9.17E-01 | 848.18   | not significant |
| 7347 | MDGA1           | 1.00 | 6.65E-01 | NA       | 70.89    | not significant |
| 7348 | RPL17           | 1.00 | 7.52E-01 | 8.88E-01 | 229.46   | not significant |
| 7349 | BIVM            | 1.00 | 7.36E-01 | 8.79E-01 | 156.70   | not significant |
| 7350 | ADAMTS10        | 1.00 | 7.92E-01 | 9.11E-01 | 331.98   | not significant |
| 7351 | KIF9            | 1.00 | 7.56E-01 | 8.90E-01 | 188.52   | not significant |
| 7352 | CASP9           | 1.00 | 7.32E-01 | 8.77E-01 | 143.58   | not significant |
| 7353 | LOC256880       | 1.00 | 4.07E-01 | NA       | 17.68    | not significant |
| 7354 | DAB2IP          | 1.00 | 4.02E-01 | NA       | 18.04    | not significant |
| 7355 | ST8SIA1         | 1.00 | 6.36E-01 | NA       | 59.39    | not significant |
| 7356 | ESR2            | 1.00 | 2.75E-01 | NA       | 11.00    | not significant |
| 7357 | UCN             | 1.00 | 4.91E-01 | NA       | 27.19    | not significant |
| 7358 | CRNKL1          | 1.00 | 8.05E-01 | 9.17E-01 | 1826.84  | not significant |
| 7359 | GCA             | 1.00 | 7.85E-01 | 9.07E-01 | 327.62   | not significant |
| 7360 | HECTD4          | 1.00 | 7.38E-01 | 8.80E-01 | 3144.33  | not significant |
| 7361 | HMX2            | 1.00 | 5.98E-01 | NA       | 49.64    | not significant |
| 7362 | FAM21A          | 1.00 | 7.05E-01 | NA       | 92.19    | not significant |
| 7363 | RALY-AS1        | 1.00 | 4.62E-01 | NA       | 23.85    | not significant |
| 7364 | RAG1            | 1.00 | 5.76E-01 | NA       | 41.45    | not significant |
| 7365 | ANKDD1A         | 1.00 | 4.85E-01 | NA       | 29.42    | not significant |
| 7366 | SNAPC1          | 1.00 | 7.99E-01 | 9.13E-01 | 671.95   | not significant |
| 7367 | DUSP12          | 1.00 | 8.02E-01 | 9.15E-01 | 797.77   | not significant |
| 7368 | COX4I1          | 1.00 | 7.93E-01 | 9.11E-01 | 7433.13  | not significant |
| 7369 | UQCRC1          | 1.00 | 7.98E-01 | 9.12E-01 | 4795.09  | not significant |
| 7370 | CD247           | 1.00 | 7.83E-01 | 9.06E-01 | 7873.03  | not significant |
| 7371 | RAB5B           | 1.00 | 7.73E-01 | 9.00E-01 | 4215.85  | not significant |
| 7372 | POLR1E          | 1.00 | 8.06E-01 | 9.17E-01 | 1603.95  | not significant |
| 7373 | TM9SF3          | 1.00 | 7.79E-01 | 9.03E-01 | 7159.94  | not significant |
| 7374 | CCDC132         | 1.00 | 8.10E-01 | 9.19E-01 | 1031.17  | not significant |
| 7375 | UNC119          | 1.00 | 7.97E-01 | 9.12E-01 | 749.33   | not significant |
| 7376 | TVP23B          | 1.00 | 7.83E-01 | 9.06E-01 | 308.03   | not significant |
| 7377 | TMEM50B         | 1.00 | 7.87E-01 | 9.08E-01 | 378.70   | not significant |
| 7378 | REL             | 1.00 | 7.44E-01 | 8.84E-01 | 1390.37  | not significant |
| 7379 | HOXB7           | 1.00 | 9.39E-01 | NA       | 27.51    | not significant |

|      |              |      |          |          |          |                 |
|------|--------------|------|----------|----------|----------|-----------------|
| 7380 | FES          | 1.00 | 6.08E-01 | NA       | 56.66    | not significant |
| 7381 | GAS6-AS1     | 1.00 | 5.00E-01 | NA       | 30.41    | not significant |
| 7382 | LOC100335030 | 1.00 | 4.14E-01 | NA       | 20.31    | not significant |
| 7383 | PLXDC1       | 1.00 | 3.47E-01 | NA       | 17.08    | not significant |
| 7384 | EXOC7        | 1.00 | 7.78E-01 | 9.03E-01 | 9481.33  | not significant |
| 7385 | ERGIC1       | 1.00 | 7.57E-01 | 8.91E-01 | 10291.80 | not significant |
| 7386 | PXDN         | 1.00 | 7.81E-01 | 9.05E-01 | 3313.36  | not significant |
| 7387 | ZNF559       | 1.00 | 7.93E-01 | 9.11E-01 | 440.91   | not significant |
| 7388 | LEF1-AS1     | 1.00 | 7.45E-01 | 8.85E-01 | 180.76   | not significant |
| 7389 | CTSK         | 1.00 | 6.24E-01 | NA       | 60.88    | not significant |
| 7390 | SLC44A1      | 1.00 | 7.55E-01 | 8.90E-01 | 489.62   | not significant |
| 7391 | COL18A1      | 1.00 | 6.69E-01 | NA       | 87.43    | not significant |
| 7392 | HLA-DMA      | 1.00 | 4.38E-01 | NA       | 22.14    | not significant |
| 7393 | NACA2        | 1.00 | 4.94E-01 | NA       | 28.80    | not significant |
| 7394 | LOC400863    | 1.00 | 5.23E-01 | NA       | 34.18    | not significant |
| 7395 | SARM1        | 1.00 | 6.54E-01 | NA       | 89.32    | not significant |
| 7396 | KIAA2022     | 1.00 | 5.70E-01 | NA       | 42.38    | not significant |
| 7397 | CEACAM21     | 1.00 | 4.48E-01 | NA       | 23.55    | not significant |
| 7398 | SEMA6A-AS1   | 1.00 | 2.95E-01 | NA       | 13.04    | not significant |
| 7399 | LOC100652758 | 1.00 | 4.56E-01 | NA       | 25.26    | not significant |
| 7400 | MID1IP1      | 1.01 | 8.28E-01 | 9.28E-01 | 3448.47  | not significant |
| 7401 | APEH         | 1.01 | 7.71E-01 | 8.99E-01 | 4124.33  | not significant |
| 7402 | RBX1         | 1.01 | 8.07E-01 | 9.17E-01 | 2071.69  | not significant |
| 7403 | UBE2M        | 1.01 | 7.97E-01 | 9.12E-01 | 4411.19  | not significant |
| 7404 | TIA1         | 1.01 | 7.37E-01 | 8.80E-01 | 5773.73  | not significant |
| 7405 | KIAA0100     | 1.01 | 7.84E-01 | 9.06E-01 | 9148.72  | not significant |
| 7406 | ZNF700       | 1.01 | 7.94E-01 | 9.11E-01 | 525.78   | not significant |
| 7407 | ZNF292       | 1.01 | 8.14E-01 | 9.21E-01 | 2844.68  | not significant |
| 7408 | NADK2        | 1.01 | 7.99E-01 | 9.14E-01 | 1453.21  | not significant |
| 7409 | CRHR1-IT1    | 1.01 | 4.42E-01 | NA       | 24.18    | not significant |
| 7410 | GK5          | 1.01 | 7.95E-01 | 9.12E-01 | 1085.72  | not significant |
| 7411 | WDR60        | 1.01 | 7.74E-01 | 9.00E-01 | 597.23   | not significant |
| 7412 | EPHX1        | 1.01 | 6.99E-01 | 8.59E-01 | 113.90   | not significant |
| 7413 | LPP-AS2      | 1.01 | 6.23E-01 | NA       | 65.63    | not significant |
| 7414 | ISPD         | 1.01 | 7.12E-01 | 8.66E-01 | 139.61   | not significant |
| 7415 | ARMCX2       | 1.01 | 3.03E-01 | NA       | 14.12    | not significant |
| 7416 | PPFIA4       | 1.01 | 4.01E-01 | NA       | 19.17    | not significant |
| 7417 | C1orf61      | 1.01 | 3.97E-01 | NA       | 19.29    | not significant |
| 7418 | ABCD2        | 1.01 | 5.72E-01 | NA       | 46.72    | not significant |
| 7419 | OTUD1        | 1.01 | 4.70E-01 | NA       | 26.98    | not significant |
| 7420 | RASGRF1      | 1.01 | 3.44E-01 | NA       | 16.54    | not significant |
| 7421 | GPR171       | 1.01 | 2.90E-01 | NA       | 12.11    | not significant |
| 7422 | NR4A3        | 1.01 | 4.14E-01 | NA       | 22.86    | not significant |
| 7423 | LSM8         | 1.01 | 7.91E-01 | 9.10E-01 | 2807.96  | not significant |
| 7424 | MAP3K14      | 1.01 | 7.71E-01 | 8.99E-01 | 588.22   | not significant |
| 7425 | C6orf211     | 1.01 | 7.97E-01 | 9.12E-01 | 1488.28  | not significant |
| 7426 | RNASE6       | 1.01 | 5.44E-01 | NA       | 45.98    | not significant |
| 7427 | TROVE2       | 1.01 | 7.96E-01 | 9.12E-01 | 1156.92  | not significant |
| 7428 | WDR64        | 1.01 | 2.99E-01 | NA       | 13.03    | not significant |
| 7429 | TPTE2P5      | 1.01 | 4.03E-01 | NA       | 20.39    | not significant |
| 7430 | SNHG10       | 1.01 | 7.43E-01 | 8.84E-01 | 231.15   | not significant |
| 7431 | NDOR1        | 1.01 | 7.89E-01 | 9.09E-01 | 2861.80  | not significant |
| 7432 | PNMA2        | 1.01 | 7.85E-01 | 9.07E-01 | 2362.42  | not significant |
| 7433 | STAG3        | 1.01 | 7.78E-01 | 9.03E-01 | 403.31   | not significant |
| 7434 | UQCR11       | 1.01 | 7.83E-01 | 9.06E-01 | 3203.08  | not significant |
| 7435 | ZNF69        | 1.01 | 6.70E-01 | 8.45E-01 | 101.65   | not significant |
| 7436 | POLR2J4      | 1.01 | 7.53E-01 | 8.89E-01 | 244.25   | not significant |
| 7437 | MX1          | 1.01 | 7.02E-01 | 8.59E-01 | 124.14   | not significant |
| 7438 | PCGF2        | 1.01 | 7.47E-01 | 8.85E-01 | 235.03   | not significant |
| 7439 | KIAA1328     | 1.01 | 7.38E-01 | 8.80E-01 | 230.17   | not significant |
| 7440 | LOC728024    | 1.01 | 5.43E-01 | NA       | 43.33    | not significant |
| 7441 | SDHAP3       | 1.01 | 6.92E-01 | 8.54E-01 | 111.49   | not significant |
| 7442 | ANKRD20A5P   | 1.01 | 6.20E-01 | NA       | 74.28    | not significant |
| 7443 | C3AR1        | 1.01 | 5.01E-01 | NA       | 33.79    | not significant |
| 7444 | LOC101929140 | 1.01 | 3.79E-01 | NA       | 20.15    | not significant |
| 7445 | BCL2L2       | 1.01 | 4.01E-01 | NA       | 21.27    | not significant |
| 7446 | FAM66B       | 1.01 | 5.06E-01 | NA       | 34.25    | not significant |
| 7447 | TLL1         | 1.01 | 4.73E-01 | NA       | 31.06    | not significant |
| 7448 | MAPK8IP2     | 1.01 | 2.98E-01 | NA       | 15.14    | not significant |
| 7449 | INO80C       | 1.01 | 7.82E-01 | 9.05E-01 | 487.54   | not significant |
| 7450 | TRAPPC1      | 1.01 | 7.57E-01 | 8.91E-01 | 2951.81  | not significant |
| 7451 | DAD1         | 1.01 | 8.05E-01 | 9.17E-01 | 2386.84  | not significant |
| 7452 | MPHOSPH6     | 1.01 | 7.31E-01 | 8.77E-01 | 2061.45  | not significant |
| 7453 | STRN4        | 1.01 | 7.84E-01 | 9.06E-01 | 3193.60  | not significant |
| 7454 | TAF1D        | 1.01 | 7.91E-01 | 9.10E-01 | 1509.01  | not significant |
| 7455 | HELLS        | 1.01 | 7.98E-01 | 9.12E-01 | 2411.90  | not significant |
| 7456 | EPN2         | 1.01 | 7.47E-01 | 8.85E-01 | 531.06   | not significant |
| 7457 | PAIP1        | 1.01 | 8.16E-01 | 9.23E-01 | 1200.72  | not significant |
| 7458 | SLC35E1      | 1.01 | 7.42E-01 | 8.83E-01 | 2716.13  | not significant |
| 7459 | TMEM86B      | 1.01 | 7.59E-01 | 8.92E-01 | 300.74   | not significant |
| 7460 | LOC100129034 | 1.01 | 7.71E-01 | 8.99E-01 | 531.89   | not significant |
| 7461 | SYNE3        | 1.01 | 7.28E-01 | 8.75E-01 | 181.44   | not significant |
| 7462 | LOXL1-AS1    | 1.01 | 6.17E-01 | NA       | 65.30    | not significant |
| 7463 | SLC12A5      | 1.01 | 4.05E-01 | NA       | 22.81    | not significant |
| 7464 | FAM192A      | 1.01 | 7.72E-01 | 8.99E-01 | 3774.86  | not significant |
| 7465 | PRKD3        | 1.01 | 7.77E-01 | 9.03E-01 | 2850.45  | not significant |
| 7466 | RPS3A        | 1.01 | 8.01E-01 | 9.14E-01 | 11588.68 | not significant |
| 7467 | SLC30A7      | 1.01 | 7.94E-01 | 9.11E-01 | 2020.49  | not significant |



|      |              |      |          |          |          |                 |
|------|--------------|------|----------|----------|----------|-----------------|
| 7468 | TMEM120A     | 1.01 | 7.23E-01 | 8.72E-01 | 170.29   | not significant |
| 7469 | CGRRF1       | 1.01 | 7.49E-01 | 8.86E-01 | 278.48   | not significant |
| 7470 | PITPNM3      | 1.01 | 4.51E-01 | NA       | 26.88    | not significant |
| 7471 | C16orf95     | 1.01 | 6.70E-01 | NA       | 100.19   | not significant |
| 7472 | LOC101927572 | 1.01 | 5.31E-01 | NA       | 41.58    | not significant |
| 7473 | ERICH5       | 1.01 | 3.69E-01 | NA       | 19.13    | not significant |
| 7474 | SATB1-AS1    | 1.01 | 3.54E-01 | NA       | 19.74    | not significant |
| 7475 | PTPMT1       | 1.01 | 7.87E-01 | 9.08E-01 | 1413.07  | not significant |
| 7476 | RNF216       | 1.01 | 7.80E-01 | 9.04E-01 | 3485.68  | not significant |
| 7477 | POLR2J3      | 1.01 | 7.50E-01 | 8.86E-01 | 278.22   | not significant |
| 7478 | NBPF1        | 1.01 | 7.88E-01 | 9.09E-01 | 926.27   | not significant |
| 7479 | RPL27A       | 1.01 | 7.55E-01 | 8.90E-01 | 15147.14 | not significant |
| 7480 | HCN2         | 1.01 | 4.95E-01 | NA       | 39.19    | not significant |
| 7481 | SPATA2L      | 1.01 | 7.05E-01 | 8.61E-01 | 141.50   | not significant |
| 7482 | LACE1        | 1.01 | 6.63E-01 | 8.41E-01 | 100.67   | not significant |
| 7483 | SRGAP3       | 1.01 | 5.98E-01 | NA       | 78.46    | not significant |
| 7484 | FGFBP3       | 1.01 | 6.57E-01 | 8.38E-01 | 103.46   | not significant |
| 7485 | C17orf58     | 1.01 | 4.02E-01 | NA       | 23.67    | not significant |
| 7486 | LOC100130357 | 1.01 | 3.56E-01 | NA       | 19.19    | not significant |
| 7487 | SKA2         | 1.01 | 7.61E-01 | 8.93E-01 | 4159.27  | not significant |
| 7488 | ATP13A1      | 1.01 | 7.94E-01 | 9.11E-01 | 3499.26  | not significant |
| 7489 | MIS12        | 1.01 | 7.94E-01 | 9.11E-01 | 2361.73  | not significant |
| 7490 | BRF2         | 1.01 | 7.80E-01 | 9.04E-01 | 956.48   | not significant |
| 7491 | ZNF273       | 1.01 | 8.02E-01 | 9.14E-01 | 1433.74  | not significant |
| 7492 | UQCQRQ       | 1.01 | 7.66E-01 | 8.96E-01 | 3013.24  | not significant |
| 7493 | RDH5         | 1.01 | 4.17E-01 | NA       | 26.70    | not significant |
| 7494 | LOC102724814 | 1.01 | 6.61E-01 | 8.40E-01 | 124.82   | not significant |
| 7495 | C4orf32      | 1.01 | 7.00E-01 | 8.59E-01 | 151.27   | not significant |
| 7496 | C21orf128    | 1.01 | 2.78E-01 | NA       | 14.22    | not significant |
| 7497 | ABCA2        | 1.01 | 4.82E-01 | NA       | 33.75    | not significant |
| 7498 | VSX1         | 1.01 | 2.68E-01 | NA       | 13.71    | not significant |
| 7499 | CHKB-AS1     | 1.01 | 3.95E-01 | NA       | 24.91    | not significant |
| 7500 | DNAJC15      | 1.01 | 7.69E-01 | 8.98E-01 | 456.03   | not significant |
| 7501 | NFE2L1       | 1.01 | 7.62E-01 | 8.94E-01 | 4895.37  | not significant |
| 7502 | PABPC4L      | 1.01 | 7.79E-01 | 9.03E-01 | 660.80   | not significant |
| 7503 | STXBP1       | 1.01 | 7.72E-01 | 8.99E-01 | 455.69   | not significant |
| 7504 | SNX25        | 1.01 | 7.91E-01 | 9.10E-01 | 781.98   | not significant |
| 7505 | APH1B        | 1.01 | 7.01E-01 | 8.59E-01 | 158.86   | not significant |
| 7506 | ZNF594       | 1.01 | 7.15E-01 | 8.68E-01 | 181.31   | not significant |
| 7507 | NPR2         | 1.01 | 6.61E-01 | 8.40E-01 | 103.23   | not significant |
| 7508 | FABP5        | 1.01 | 7.19E-01 | 8.71E-01 | 1008.50  | not significant |
| 7509 | ALDH3A2      | 1.01 | 3.04E-01 | NA       | 15.50    | not significant |
| 7510 | AGER         | 1.01 | 6.11E-01 | NA       | 71.43    | not significant |
| 7511 | ADARB2       | 1.01 | 4.19E-01 | NA       | 26.55    | not significant |
| 7512 | SLC23A3      | 1.01 | 4.13E-01 | NA       | 25.15    | not significant |
| 7513 | PARK7        | 1.01 | 7.67E-01 | 8.96E-01 | 4811.61  | not significant |
| 7514 | C16orf13     | 1.01 | 7.11E-01 | 8.65E-01 | 2077.30  | not significant |
| 7515 | USP22        | 1.01 | 7.27E-01 | 8.75E-01 | 10176.73 | not significant |
| 7516 | FLOT1        | 1.01 | 7.79E-01 | 9.03E-01 | 1355.72  | not significant |
| 7517 | TM9SF4       | 1.01 | 7.98E-01 | 9.12E-01 | 3493.24  | not significant |
| 7518 | ABCG1        | 1.01 | 7.29E-01 | 8.76E-01 | 225.34   | not significant |
| 7519 | TOP3B        | 1.01 | 7.75E-01 | 9.01E-01 | 1051.25  | not significant |
| 7520 | TCAIM        | 1.01 | 7.70E-01 | 8.98E-01 | 1058.91  | not significant |
| 7521 | NID2         | 1.01 | 7.02E-01 | 8.59E-01 | 156.51   | not significant |
| 7522 | SMPD1        | 1.01 | 6.40E-01 | NA       | 87.09    | not significant |
| 7523 | TMEM169      | 1.01 | 1.60E-01 | NA       | 9.63     | not significant |
| 7524 | C11orf48     | 1.01 | 6.28E-01 | NA       | 80.52    | not significant |
| 7525 | UCP3         | 1.01 | 6.16E-01 | NA       | 72.99    | not significant |
| 7526 | LOC115110    | 1.01 | 5.28E-01 | NA       | 44.15    | not significant |
| 7527 | LINC00892    | 1.01 | 4.02E-01 | NA       | 24.62    | not significant |
| 7528 | MDH1         | 1.01 | 7.46E-01 | 8.85E-01 | 6158.96  | not significant |
| 7529 | NUP85        | 1.01 | 7.52E-01 | 8.88E-01 | 4283.46  | not significant |
| 7530 | NELFE        | 1.01 | 7.77E-01 | 9.02E-01 | 1635.22  | not significant |
| 7531 | IMPA1        | 1.01 | 7.14E-01 | 8.67E-01 | 2048.39  | not significant |
| 7532 | ASAH1        | 1.01 | 7.95E-01 | 9.12E-01 | 1190.07  | not significant |
| 7533 | SEC23A       | 1.01 | 7.74E-01 | 9.00E-01 | 1599.50  | not significant |
| 7534 | LINC01000    | 1.01 | 8.23E-01 | 9.26E-01 | 1476.34  | not significant |
| 7535 | ICK          | 1.01 | 7.59E-01 | 8.92E-01 | 426.90   | not significant |
| 7536 | STAC3        | 1.01 | 7.19E-01 | 8.71E-01 | 199.01   | not significant |
| 7537 | SYNGAP1      | 1.01 | 7.22E-01 | 8.71E-01 | 250.85   | not significant |
| 7538 | NSUN3        | 1.01 | 7.41E-01 | 8.82E-01 | 276.63   | not significant |
| 7539 | CCDC7        | 1.01 | 6.56E-01 | NA       | 97.78    | not significant |
| 7540 | CACFD1       | 1.01 | 2.76E-01 | NA       | 14.67    | not significant |
| 7541 | RNF165       | 1.01 | 3.30E-01 | NA       | 22.19    | not significant |
| 7542 | SLC37A2      | 1.01 | 5.03E-01 | NA       | 42.33    | not significant |
| 7543 | GTF2B        | 1.01 | 8.01E-01 | 9.14E-01 | 1529.87  | not significant |
| 7544 | THOC2        | 1.01 | 7.39E-01 | 8.80E-01 | 4651.78  | not significant |
| 7545 | ANKRD11      | 1.01 | 7.63E-01 | 8.94E-01 | 5897.23  | not significant |
| 7546 | SNTB1        | 1.01 | 6.85E-01 | 8.52E-01 | 148.65   | not significant |
| 7547 | MRPS31P5     | 1.01 | 7.51E-01 | 8.88E-01 | 372.34   | not significant |
| 7548 | NKR          | 1.01 | 7.44E-01 | 8.84E-01 | 4649.28  | not significant |
| 7549 | MIR600HG     | 1.01 | 6.89E-01 | 8.54E-01 | 190.40   | not significant |
| 7550 | CALML4       | 1.01 | 7.22E-01 | 8.72E-01 | 224.81   | not significant |
| 7551 | TMSB4Y       | 1.01 | 5.91E-01 | NA       | 75.85    | not significant |
| 7552 | NCLN         | 1.01 | 7.36E-01 | 8.79E-01 | 5061.47  | not significant |
| 7553 | MAP2K5       | 1.01 | 7.62E-01 | 8.94E-01 | 862.23   | not significant |
| 7554 | PNMA1        | 1.01 | 7.72E-01 | 8.99E-01 | 1409.37  | not significant |
| 7555 | ZNF71        | 1.01 | 7.54E-01 | 8.89E-01 | 788.91   | not significant |

|      |              |      |          |          |          |                 |
|------|--------------|------|----------|----------|----------|-----------------|
| 7556 | KIAA1211     | 1.01 | 7.08E-01 | 8.63E-01 | 216.11   | not significant |
| 7557 | TMA7         | 1.01 | 7.37E-01 | 8.80E-01 | 2566.01  | not significant |
| 7558 | SEC61A2      | 1.01 | 7.34E-01 | 8.78E-01 | 268.84   | not significant |
| 7559 | PHKG1        | 1.01 | 5.55E-01 | NA       | 56.57    | not significant |
| 7560 | NCK1-AS1     | 1.01 | 5.71E-01 | NA       | 60.25    | not significant |
| 7561 | C18orf32     | 1.01 | 4.10E-01 | NA       | 30.67    | not significant |
| 7562 | SPHK1        | 1.01 | 6.45E-01 | NA       | 99.88    | not significant |
| 7563 | KCNMB3       | 1.01 | 2.02E-01 | NA       | 12.18    | not significant |
| 7564 | LOC100128288 | 1.01 | 4.40E-01 | NA       | 31.84    | not significant |
| 7565 | LOC654841    | 1.01 | 2.66E-01 | NA       | 15.48    | not significant |
| 7566 | XRCC3        | 1.01 | 7.56E-01 | 8.90E-01 | 2360.05  | not significant |
| 7567 | TM2D3        | 1.01 | 7.61E-01 | 8.93E-01 | 978.75   | not significant |
| 7568 | VIMP         | 1.01 | 7.71E-01 | 8.99E-01 | 1114.43  | not significant |
| 7569 | TMEM234      | 1.01 | 6.31E-01 | NA       | 94.08    | not significant |
| 7570 | TMEM140      | 1.01 | 6.24E-01 | 8.16E-01 | 101.92   | not significant |
| 7571 | WDR25        | 1.01 | 6.88E-01 | 8.54E-01 | 153.74   | not significant |
| 7572 | LOC653160    | 1.01 | 4.18E-01 | NA       | 28.34    | not significant |
| 7573 | RSG1         | 1.01 | 6.12E-01 | NA       | 81.94    | not significant |
| 7574 | CEBPE        | 1.01 | 5.71E-01 | NA       | 67.28    | not significant |
| 7575 | MAP3K14-AS1  | 1.01 | 6.56E-01 | 8.38E-01 | 118.70   | not significant |
| 7576 | WFS1         | 1.01 | 5.58E-01 | NA       | 65.00    | not significant |
| 7577 | LYPD5        | 1.01 | 3.09E-01 | NA       | 17.96    | not significant |
| 7578 | C1orf162     | 1.01 | 3.06E-01 | NA       | 18.73    | not significant |
| 7579 | CENPB        | 1.01 | 7.51E-01 | 8.87E-01 | 4761.06  | not significant |
| 7580 | FAM89B       | 1.01 | 7.64E-01 | 8.95E-01 | 978.56   | not significant |
| 7581 | TMC01        | 1.01 | 7.22E-01 | 8.72E-01 | 5983.61  | not significant |
| 7582 | UBE2L6       | 1.01 | 7.03E-01 | 8.60E-01 | 5416.94  | not significant |
| 7583 | C9orf64      | 1.01 | 7.68E-01 | 8.97E-01 | 857.56   | not significant |
| 7584 | THRAP3       | 1.01 | 7.08E-01 | 8.63E-01 | 12065.51 | not significant |
| 7585 | MVB12B       | 1.01 | 7.65E-01 | 8.95E-01 | 1286.50  | not significant |
| 7586 | CNOT3        | 1.01 | 7.69E-01 | 8.98E-01 | 1117.11  | not significant |
| 7587 | RIMS3        | 1.01 | 7.63E-01 | 8.94E-01 | 1590.58  | not significant |
| 7588 | MAU2         | 1.01 | 7.72E-01 | 9.00E-01 | 2662.83  | not significant |
| 7589 | RPS6KA4      | 1.01 | 7.19E-01 | 8.70E-01 | 1975.50  | not significant |
| 7590 | MYNN         | 1.01 | 7.54E-01 | 8.89E-01 | 968.24   | not significant |
| 7591 | ZFP37        | 1.01 | 6.78E-01 | 8.49E-01 | 146.15   | not significant |
| 7592 | ZNF274       | 1.01 | 7.44E-01 | 8.84E-01 | 378.16   | not significant |
| 7593 | EPOR         | 1.01 | 6.35E-01 | 8.23E-01 | 102.09   | not significant |
| 7594 | RPL23AP7     | 1.01 | 6.07E-01 | NA       | 82.03    | not significant |
| 7595 | ITGA9-AS1    | 1.01 | 2.69E-01 | NA       | 16.65    | not significant |
| 7596 | JMJD7        | 1.01 | 6.23E-01 | NA       | 91.32    | not significant |
| 7597 | CECR7        | 1.01 | 4.96E-01 | NA       | 42.84    | not significant |
| 7598 | LOC101927599 | 1.01 | 5.71E-01 | NA       | 69.04    | not significant |
| 7599 | PTPRD        | 1.01 | 4.27E-01 | NA       | 33.06    | not significant |
| 7600 | FUT8         | 1.01 | 7.61E-01 | 8.93E-01 | 3203.58  | not significant |
| 7601 | RBM3         | 1.01 | 7.17E-01 | 8.70E-01 | 1956.43  | not significant |
| 7602 | SLC8A1       | 1.01 | 7.12E-01 | 8.65E-01 | 148.02   | not significant |
| 7603 | NUMBL        | 1.01 | 7.27E-01 | 8.74E-01 | 280.75   | not significant |
| 7604 | SIRT3        | 1.01 | 7.39E-01 | 8.81E-01 | 348.49   | not significant |
| 7605 | HERC2P9      | 1.01 | 6.91E-01 | 8.54E-01 | 181.25   | not significant |
| 7606 | PAQR7        | 1.01 | 4.76E-01 | NA       | 43.69    | not significant |
| 7607 | HHLA3        | 1.01 | 5.28E-01 | NA       | 70.23    | not significant |
| 7608 | LOC101927391 | 1.01 | 1.83E-01 | NA       | 11.02    | not significant |
| 7609 | HIST1H3G     | 1.01 | 2.08E-01 | NA       | 13.83    | not significant |
| 7610 | GPR85        | 1.01 | 1.38E-01 | NA       | 9.78     | not significant |
| 7611 | LYSMD2       | 1.01 | 7.57E-01 | 8.91E-01 | 746.88   | not significant |
| 7612 | RB1          | 1.01 | 7.10E-01 | 8.64E-01 | 13251.74 | not significant |
| 7613 | PRRT4        | 1.01 | 4.09E-01 | NA       | 29.38    | not significant |
| 7614 | ZNF696       | 1.01 | 7.51E-01 | 8.87E-01 | 694.71   | not significant |
| 7615 | ZNF613       | 1.01 | 7.27E-01 | 8.74E-01 | 296.78   | not significant |
| 7616 | MRPS14       | 1.01 | 7.46E-01 | 8.85E-01 | 890.29   | not significant |
| 7617 | SNHG20       | 1.01 | 7.40E-01 | 8.81E-01 | 386.92   | not significant |
| 7618 | QSOX2        | 1.01 | 7.62E-01 | 8.94E-01 | 1087.29  | not significant |
| 7619 | KIAA1656     | 1.01 | 5.70E-01 | NA       | 67.78    | not significant |
| 7620 | TXK          | 1.01 | 5.31E-01 | NA       | 52.99    | not significant |
| 7621 | CHDH         | 1.01 | 3.50E-01 | NA       | 23.20    | not significant |
| 7622 | CARS         | 1.01 | 7.12E-01 | 8.66E-01 | 2557.77  | not significant |
| 7623 | HIF1A        | 1.01 | 7.38E-01 | 8.80E-01 | 3977.63  | not significant |
| 7624 | MTMR3        | 1.01 | 7.56E-01 | 8.90E-01 | 1632.49  | not significant |
| 7625 | FBXO10       | 1.01 | 7.25E-01 | 8.74E-01 | 305.01   | not significant |
| 7626 | PRPF40B      | 1.01 | 6.71E-01 | 8.46E-01 | 155.94   | not significant |
| 7627 | GLT1D1       | 1.01 | 7.36E-01 | 8.79E-01 | 354.66   | not significant |
| 7628 | COX14        | 1.01 | 6.87E-01 | 8.53E-01 | 787.17   | not significant |
| 7629 | SLC4A8       | 1.01 | 6.90E-01 | 8.54E-01 | 196.97   | not significant |
| 7630 | NMRK1        | 1.01 | 6.36E-01 | 8.24E-01 | 114.11   | not significant |
| 7631 | IFITM3       | 1.01 | 3.80E-01 | NA       | 27.86    | not significant |
| 7632 | EGR3         | 1.01 | 3.06E-01 | NA       | 19.16    | not significant |
| 7633 | ESYT3        | 1.01 | 3.52E-01 | NA       | 25.01    | not significant |
| 7634 | BBS12        | 1.01 | 5.85E-01 | NA       | 78.80    | not significant |
| 7635 | CRYGS        | 1.01 | 3.51E-01 | NA       | 24.25    | not significant |
| 7636 | MYO1A        | 1.01 | 4.52E-01 | NA       | 37.88    | not significant |
| 7637 | LOC101926928 | 1.01 | 2.21E-01 | NA       | 14.25    | not significant |
| 7638 | GMDS         | 1.01 | 9.20E-01 | 9.69E-01 | 1493.23  | not significant |
| 7639 | RPL29        | 1.01 | 7.64E-01 | 8.94E-01 | 12178.13 | not significant |
| 7640 | GDI2         | 1.01 | 7.12E-01 | 8.66E-01 | 12593.53 | not significant |
| 7641 | H2AFX        | 1.01 | 7.47E-01 | 8.85E-01 | 6475.39  | not significant |
| 7642 | SMIM13       | 1.01 | 7.63E-01 | 8.94E-01 | 1206.21  | not significant |
| 7643 | LOC100506083 | 1.01 | 3.87E-01 | NA       | 29.08    | not significant |

|      |              |      |          |          |          |                 |
|------|--------------|------|----------|----------|----------|-----------------|
| 7644 | TMSB15A      | 1.01 | 6.15E-01 | 8.12E-01 | 105.14   | not significant |
| 7645 | PRICKLE3     | 1.01 | 4.32E-01 | NA       | 34.92    | not significant |
| 7646 | LOC642361    | 1.01 | 4.72E-01 | NA       | 42.28    | not significant |
| 7647 | CYP2D7P      | 1.01 | 2.76E-01 | NA       | 17.68    | not significant |
| 7648 | CMC4         | 1.01 | 3.11E-01 | NA       | 21.90    | not significant |
| 7649 | ADAP1        | 1.01 | 4.27E-01 | NA       | 33.72    | not significant |
| 7650 | FXR2         | 1.01 | 7.46E-01 | 8.85E-01 | 2064.01  | not significant |
| 7651 | MELK         | 1.01 | 7.39E-01 | 8.80E-01 | 2963.67  | not significant |
| 7652 | SNHG11       | 1.01 | 7.02E-01 | 8.59E-01 | 508.44   | not significant |
| 7653 | NT5DC1       | 1.01 | 7.26E-01 | 8.74E-01 | 526.97   | not significant |
| 7654 | PIAS4        | 1.01 | 7.47E-01 | 8.85E-01 | 992.51   | not significant |
| 7655 | MST1         | 1.01 | 5.54E-01 | NA       | 66.34    | not significant |
| 7656 | SYTL3        | 1.01 | 2.84E-01 | NA       | 18.77    | not significant |
| 7657 | BHLHB9       | 1.01 | 7.00E-01 | 8.59E-01 | 248.52   | not significant |
| 7658 | DPY19L1      | 1.01 | 6.09E-01 | NA       | 93.74    | not significant |
| 7659 | C5orf55      | 1.01 | 5.13E-01 | NA       | 54.20    | not significant |
| 7660 | MTMR8        | 1.01 | 6.57E-01 | 8.38E-01 | 126.76   | not significant |
| 7661 | SLC25A34     | 1.01 | 4.06E-01 | NA       | 31.54    | not significant |
| 7662 | KRBA2        | 1.01 | 5.35E-01 | NA       | 68.58    | not significant |
| 7663 | CAPS         | 1.01 | 5.18E-01 | NA       | 57.07    | not significant |
| 7664 | MYLK-AS1     | 1.01 | 8.93E-01 | NA       | 36.18    | not significant |
| 7665 | IMPA2        | 1.01 | 1.87E-01 | NA       | 12.63    | not significant |
| 7666 | SNHG15       | 1.01 | 7.47E-01 | 8.85E-01 | 1793.60  | not significant |
| 7667 | ACTN4        | 1.01 | 6.91E-01 | 8.54E-01 | 6731.80  | not significant |
| 7668 | MAMDC4       | 1.01 | 6.77E-01 | 8.49E-01 | 206.22   | not significant |
| 7669 | ITPR1P       | 1.01 | 7.25E-01 | 8.74E-01 | 812.40   | not significant |
| 7670 | DGCR14       | 1.01 | 7.43E-01 | 8.84E-01 | 1029.79  | not significant |
| 7671 | STOX1        | 1.01 | 6.91E-01 | 8.54E-01 | 209.38   | not significant |
| 7672 | PPP1R18      | 1.01 | 7.26E-01 | 8.74E-01 | 351.90   | not significant |
| 7673 | GLIPR1       | 1.01 | 7.05E-01 | 8.61E-01 | 389.90   | not significant |
| 7674 | LINC00174    | 1.01 | 6.42E-01 | 8.29E-01 | 130.00   | not significant |
| 7675 | LOC100288798 | 1.01 | 5.76E-01 | NA       | 79.22    | not significant |
| 7676 | CAPN14       | 1.01 | 5.05E-01 | NA       | 55.64    | not significant |
| 7677 | HLA-F        | 1.01 | 3.18E-01 | NA       | 22.29    | not significant |
| 7678 | VWASA        | 1.01 | 3.86E-01 | NA       | 30.62    | not significant |
| 7679 | HOMER3       | 1.01 | 3.18E-01 | NA       | 23.30    | not significant |
| 7680 | GRAP2        | 1.01 | 7.01E-01 | 8.59E-01 | 7537.19  | not significant |
| 7681 | COMMD8       | 1.01 | 7.58E-01 | 8.91E-01 | 1199.69  | not significant |
| 7682 | CACNB1       | 1.01 | 7.06E-01 | 8.61E-01 | 551.20   | not significant |
| 7683 | NDUFS6       | 1.01 | 7.32E-01 | 8.77E-01 | 3425.04  | not significant |
| 7684 | ABCC5        | 1.01 | 7.28E-01 | 8.75E-01 | 798.21   | not significant |
| 7685 | C3orf33      | 1.01 | 6.20E-01 | 8.15E-01 | 112.99   | not significant |
| 7686 | FAM214B      | 1.01 | 6.12E-01 | 8.10E-01 | 107.24   | not significant |
| 7687 | KCNK6        | 1.01 | 6.20E-01 | 8.15E-01 | 107.19   | not significant |
| 7688 | ZNF568       | 1.01 | 6.86E-01 | 8.52E-01 | 218.94   | not significant |
| 7689 | TRAM1L1      | 1.01 | 4.50E-01 | NA       | 39.59    | not significant |
| 7690 | KLHL32       | 1.01 | 2.26E-01 | NA       | 15.14    | not significant |
| 7691 | RAD51-AS1    | 1.01 | 5.20E-04 | 7.89E-03 | 1851.90  | not significant |
| 7692 | NDUFS8       | 1.01 | 7.61E-01 | 8.93E-01 | 2283.50  | not significant |
| 7693 | DHX38        | 1.01 | 7.17E-01 | 8.69E-01 | 3502.83  | not significant |
| 7694 | LMAN1        | 1.01 | 7.32E-01 | 8.77E-01 | 10167.77 | not significant |
| 7695 | PTGER4       | 1.01 | 7.14E-01 | 8.67E-01 | 6435.84  | not significant |
| 7696 | ZNF354A      | 1.01 | 7.36E-01 | 8.79E-01 | 396.93   | not significant |
| 7697 | LONRF1       | 1.01 | 7.26E-01 | 8.74E-01 | 712.21   | not significant |
| 7698 | FOXO3        | 1.01 | 7.42E-01 | 8.83E-01 | 710.52   | not significant |
| 7699 | SLC25A4      | 1.01 | 6.63E-01 | 8.41E-01 | 179.87   | not significant |
| 7700 | AMH          | 1.01 | 7.38E-01 | 8.80E-01 | 611.29   | not significant |
| 7701 | ATP6V0B      | 1.01 | 7.20E-01 | 8.71E-01 | 4150.81  | not significant |
| 7702 | DHRS11       | 1.01 | 3.54E-01 | NA       | 26.79    | not significant |
| 7703 | TPO          | 1.01 | 5.77E-01 | 7.87E-01 | 113.83   | not significant |
| 7704 | IL1RAP       | 1.01 | 5.13E-01 | NA       | 58.87    | not significant |
| 7705 | NDUFV1       | 1.01 | 7.15E-01 | 8.68E-01 | 5767.39  | not significant |
| 7706 | FGFR1OP2     | 1.01 | 7.29E-01 | 8.76E-01 | 2495.61  | not significant |
| 7707 | CCDC23       | 1.01 | 7.09E-01 | 8.64E-01 | 335.92   | not significant |
| 7708 | USP6NL       | 1.01 | 7.35E-01 | 8.79E-01 | 1343.20  | not significant |
| 7709 | PTCHD2       | 1.01 | 7.35E-01 | 8.79E-01 | 703.88   | not significant |
| 7710 | PRNP         | 1.01 | 7.21E-01 | 8.71E-01 | 427.85   | not significant |
| 7711 | AKAP9        | 1.01 | 7.08E-01 | 8.63E-01 | 2934.65  | not significant |
| 7712 | PLTP         | 1.01 | 4.44E-01 | NA       | 40.40    | not significant |
| 7713 | PLEKHA4      | 1.01 | 3.66E-01 | NA       | 31.55    | not significant |
| 7714 | NDUFB6       | 1.01 | 7.64E-01 | 8.95E-01 | 1623.64  | not significant |
| 7715 | NDUFA4       | 1.01 | 7.18E-01 | 8.70E-01 | 4964.73  | not significant |
| 7716 | DDX5         | 1.01 | 6.63E-01 | 8.41E-01 | 15017.47 | not significant |
| 7717 | FASTK        | 1.01 | 7.36E-01 | 8.79E-01 | 2172.58  | not significant |
| 7718 | MRPS36       | 1.01 | 7.08E-01 | 8.63E-01 | 346.93   | not significant |
| 7719 | PHKB         | 1.01 | 7.26E-01 | 8.74E-01 | 2520.52  | not significant |
| 7720 | RNF146       | 1.01 | 7.19E-01 | 8.71E-01 | 583.04   | not significant |
| 7721 | NR2C2AP      | 1.01 | 7.64E-01 | 8.95E-01 | 1231.51  | not significant |
| 7722 | HDC          | 1.01 | 6.82E-01 | 8.50E-01 | 218.13   | not significant |
| 7723 | KLHL20       | 1.01 | 7.11E-01 | 8.65E-01 | 570.90   | not significant |
| 7724 | KIAA2026     | 1.01 | 7.33E-01 | 8.78E-01 | 806.14   | not significant |
| 7725 | C16orf52     | 1.01 | 7.06E-01 | 8.62E-01 | 323.81   | not significant |
| 7726 | LINC00888    | 1.01 | 6.75E-01 | 8.47E-01 | 210.62   | not significant |
| 7727 | CACNA1I      | 1.01 | 2.42E-01 | NA       | 18.40    | not significant |
| 7728 | ANAPC11      | 1.01 | 7.38E-01 | 8.80E-01 | 1695.02  | not significant |
| 7729 | GSE1         | 1.01 | 7.05E-01 | 8.61E-01 | 4452.80  | not significant |
| 7730 | GATAD2B      | 1.01 | 7.24E-01 | 8.73E-01 | 434.49   | not significant |
| 7731 | PIGV         | 1.01 | 7.12E-01 | 8.66E-01 | 361.84   | not significant |

|      |              |      |          |          |          |                 |
|------|--------------|------|----------|----------|----------|-----------------|
| 7732 | LYST         | 1.01 | 6.98E-01 | 8.59E-01 | 385.53   | not significant |
| 7733 | CUEDC1       | 1.01 | 5.72E-01 | NA       | 85.53    | not significant |
| 7734 | AMT          | 1.01 | 5.35E-01 | NA       | 76.09    | not significant |
| 7735 | LOC729296    | 1.01 | 5.20E-01 | NA       | 62.83    | not significant |
| 7736 | RAB11B-AS1   | 1.01 | 5.41E-01 | NA       | 71.88    | not significant |
| 7737 | LOC100630918 | 1.01 | 4.96E-01 | NA       | 56.67    | not significant |
| 7738 | LINCO0638    | 1.01 | 4.85E-01 | NA       | 55.77    | not significant |
| 7739 | ST13         | 1.01 | 6.98E-01 | 8.59E-01 | 8185.05  | not significant |
| 7740 | NOC4L        | 1.01 | 7.33E-01 | 8.78E-01 | 1607.43  | not significant |
| 7741 | KHNYN        | 1.01 | 7.25E-01 | 8.73E-01 | 2704.70  | not significant |
| 7742 | SMURF1       | 1.01 | 7.17E-01 | 8.69E-01 | 858.89   | not significant |
| 7743 | TMEM177      | 1.01 | 6.91E-01 | 8.54E-01 | 286.10   | not significant |
| 7744 | AKAP5        | 1.01 | 7.00E-01 | 8.59E-01 | 309.43   | not significant |
| 7745 | C16orf93     | 1.01 | 5.25E-01 | NA       | 75.13    | not significant |
| 7746 | C1RL-AS1     | 1.01 | 6.81E-01 | 8.50E-01 | 274.39   | not significant |
| 7747 | NEURL1B      | 1.01 | 5.25E-01 | NA       | 66.50    | not significant |
| 7748 | ITPKA        | 1.01 | 4.10E-01 | NA       | 38.07    | not significant |
| 7749 | MRPL45P2     | 1.01 | 3.80E-01 | NA       | 38.76    | not significant |
| 7750 | RIPK4        | 1.01 | 3.62E-01 | NA       | 33.52    | not significant |
| 7751 | MAF1         | 1.01 | 7.20E-01 | 8.71E-01 | 4499.94  | not significant |
| 7752 | SKAP1        | 1.01 | 7.32E-01 | 8.77E-01 | 1343.73  | not significant |
| 7753 | CDKN2D       | 1.01 | 7.24E-01 | 8.73E-01 | 912.56   | not significant |
| 7754 | KCNK5        | 1.01 | 7.32E-01 | 8.77E-01 | 2207.47  | not significant |
| 7755 | CCDC93       | 1.01 | 7.29E-01 | 8.76E-01 | 2183.17  | not significant |
| 7756 | SNX18        | 1.01 | 6.97E-01 | 8.59E-01 | 424.00   | not significant |
| 7757 | FAM161B      | 1.01 | 6.36E-01 | 8.24E-01 | 182.47   | not significant |
| 7758 | SYDE2        | 1.01 | 6.31E-01 | 8.21E-01 | 168.35   | not significant |
| 7759 | LOC100129917 | 1.01 | 5.88E-01 | 7.95E-01 | 103.56   | not significant |
| 7760 | ADAM21       | 1.01 | 1.69E-01 | NA       | 13.32    | not significant |
| 7761 | PWAR5        | 1.01 | 5.72E-01 | 7.83E-01 | 125.14   | not significant |
| 7762 | HOOK2        | 1.01 | 5.61E-01 | NA       | 83.53    | not significant |
| 7763 | PHEX         | 1.01 | 2.21E-01 | NA       | 17.64    | not significant |
| 7764 | LSMEM1       | 1.01 | 3.96E-01 | NA       | 38.16    | not significant |
| 7765 | FBXO25       | 1.01 | 8.30E-01 | 9.29E-01 | 1886.59  | not significant |
| 7766 | WIPF1        | 1.01 | 6.94E-01 | 8.56E-01 | 9859.24  | not significant |
| 7767 | COPG1        | 1.01 | 7.00E-01 | 8.59E-01 | 4397.01  | not significant |
| 7768 | EHMT1        | 1.01 | 7.34E-01 | 8.78E-01 | 2455.15  | not significant |
| 7769 | CTNNB1       | 1.01 | 6.96E-01 | 8.58E-01 | 4398.64  | not significant |
| 7770 | EME1         | 1.01 | 7.25E-01 | 8.74E-01 | 701.15   | not significant |
| 7771 | DAPK3        | 1.01 | 7.02E-01 | 8.59E-01 | 899.81   | not significant |
| 7772 | CLK4         | 1.01 | 7.13E-01 | 8.66E-01 | 462.10   | not significant |
| 7773 | KAT6B        | 1.01 | 7.33E-01 | 8.77E-01 | 2315.27  | not significant |
| 7774 | ABHD4        | 1.01 | 6.07E-01 | 8.06E-01 | 119.05   | not significant |
| 7775 | TIMM17B      | 1.01 | 7.06E-01 | 8.61E-01 | 444.48   | not significant |
| 7776 | USP9Y        | 1.01 | 7.05E-01 | 8.61E-01 | 2088.87  | not significant |
| 7777 | KDM8         | 1.01 | 6.74E-01 | 8.47E-01 | 245.15   | not significant |
| 7778 | RGS5         | 1.01 | 5.18E-01 | NA       | 66.99    | not significant |
| 7779 | THBS3        | 1.01 | 5.27E-01 | NA       | 68.98    | not significant |
| 7780 | RILPL1       | 1.01 | 5.66E-01 | NA       | 89.81    | not significant |
| 7781 | AKAP2        | 1.01 | 2.67E-01 | NA       | 21.84    | not significant |
| 7782 | SYNE2        | 1.01 | 3.88E-01 | 6.49E-01 | 5686.90  | not significant |
| 7783 | PLXNA4       | 1.01 | 3.75E-01 | NA       | 34.41    | not significant |
| 7784 | DBH-AS1      | 1.01 | 4.15E-01 | NA       | 46.26    | not significant |
| 7785 | RAD23A       | 1.01 | 6.98E-01 | 8.59E-01 | 5063.43  | not significant |
| 7786 | SRSF2        | 1.01 | 6.35E-01 | 8.23E-01 | 24725.99 | not significant |
| 7787 | CDC5L        | 1.01 | 6.97E-01 | 8.59E-01 | 4141.52  | not significant |
| 7788 | DPAGT1       | 1.01 | 7.03E-01 | 8.60E-01 | 1880.67  | not significant |
| 7789 | BTN2A1       | 1.01 | 7.26E-01 | 8.74E-01 | 1483.98  | not significant |
| 7790 | C1orf50      | 1.01 | 7.00E-01 | 8.59E-01 | 350.01   | not significant |
| 7791 | KDM6A        | 1.01 | 7.39E-01 | 8.80E-01 | 1197.90  | not significant |
| 7792 | IPO5P1       | 1.01 | 6.99E-01 | 8.59E-01 | 933.27   | not significant |
| 7793 | EFNB2        | 1.01 | 6.33E-01 | 8.22E-01 | 190.86   | not significant |
| 7794 | PRR19        | 1.01 | 5.31E-01 | NA       | 75.26    | not significant |
| 7795 | AGRN         | 1.01 | 4.69E-01 | NA       | 56.42    | not significant |
| 7796 | TSC22D3      | 1.01 | 2.74E-01 | NA       | 18.14    | not significant |
| 7797 | ZNF774       | 1.01 | 3.28E-01 | NA       | 29.17    | not significant |
| 7798 | HSPA2        | 1.01 | 2.22E-01 | NA       | 19.76    | not significant |
| 7799 | DUSP5P1      | 1.01 | 1.65E-01 | NA       | 14.95    | not significant |
| 7800 | SRRM2-AS1    | 1.01 | 1.59E-01 | NA       | 13.51    | not significant |
| 7801 | ZNF141       | 1.01 | 1.15E-01 | NA       | 10.79    | not significant |
| 7802 | CDKN2AIP     | 1.01 | 7.20E-01 | 8.71E-01 | 1690.85  | not significant |
| 7803 | ETV3         | 1.01 | 7.02E-01 | 8.59E-01 | 466.49   | not significant |
| 7804 | ZNF730       | 1.01 | 6.69E-01 | 8.44E-01 | 273.84   | not significant |
| 7805 | MPZ          | 1.01 | 4.26E-01 | NA       | 44.43    | not significant |
| 7806 | DDX11L2      | 1.01 | 2.59E-01 | NA       | 20.85    | not significant |
| 7807 | FLJ22447     | 1.01 | 2.24E-01 | NA       | 19.98    | not significant |
| 7808 | CRYGN        | 1.01 | 1.83E-01 | NA       | 15.93    | not significant |
| 7809 | PIN1         | 1.01 | 7.19E-01 | 8.71E-01 | 2625.39  | not significant |
| 7810 | TEX30        | 1.01 | 7.28E-01 | 8.75E-01 | 1100.95  | not significant |
| 7811 | SIRT6        | 1.01 | 6.97E-01 | 8.59E-01 | 934.37   | not significant |
| 7812 | DCAKD        | 1.01 | 6.90E-01 | 8.54E-01 | 888.38   | not significant |
| 7813 | AKAP11       | 1.01 | 6.66E-01 | 8.43E-01 | 1857.67  | not significant |
| 7814 | FBXW8        | 1.01 | 6.94E-01 | 8.56E-01 | 1025.97  | not significant |
| 7815 | TXNDC16      | 1.01 | 7.06E-01 | 8.62E-01 | 634.13   | not significant |
| 7816 | HSPBAP1      | 1.01 | 6.66E-01 | 8.42E-01 | 260.36   | not significant |
| 7817 | PPARA        | 1.01 | 6.34E-01 | 8.23E-01 | 174.39   | not significant |
| 7818 | CCDC126      | 1.01 | 6.55E-01 | 8.37E-01 | 214.44   | not significant |
| 7819 | MT1F         | 1.01 | 4.97E-01 | NA       | 69.41    | not significant |

|      |              |      |          |          |          |                 |
|------|--------------|------|----------|----------|----------|-----------------|
| 7820 | PRSS36       | 1.01 | 1.31E-01 | NA       | 12.40    | not significant |
| 7821 | MICA         | 1.01 | 4.25E-01 | NA       | 44.49    | not significant |
| 7822 | ADRM1        | 1.01 | 7.06E-01 | 8.61E-01 | 4030.04  | not significant |
| 7823 | PIGP         | 1.01 | 6.91E-01 | 8.54E-01 | 397.61   | not significant |
| 7824 | RAI1         | 1.01 | 6.02E-01 | 8.03E-01 | 2719.01  | not significant |
| 7825 | SRD5A3       | 1.01 | 6.87E-01 | 8.53E-01 | 328.88   | not significant |
| 7826 | C14orf93     | 1.01 | 5.63E-01 | NA       | 97.80    | not significant |
| 7827 | VPS37C       | 1.01 | 6.38E-01 | 8.25E-01 | 174.20   | not significant |
| 7828 | SLC14A1      | 1.01 | 3.23E-01 | NA       | 28.75    | not significant |
| 7829 | FGFR3        | 1.01 | 5.61E-01 | NA       | 100.66   | not significant |
| 7830 | KLF7         | 1.01 | 2.93E-01 | NA       | 25.65    | not significant |
| 7831 | KIAA1407     | 1.01 | 3.83E-01 | NA       | 37.40    | not significant |
| 7832 | HSD17B14     | 1.01 | 3.38E-01 | NA       | 33.26    | not significant |
| 7833 | IRF3         | 1.01 | 7.05E-01 | 8.61E-01 | 1791.73  | not significant |
| 7834 | KPTN         | 1.01 | 6.88E-01 | 8.54E-01 | 375.12   | not significant |
| 7835 | NADSYN1      | 1.01 | 7.16E-01 | 8.69E-01 | 1400.68  | not significant |
| 7836 | POC1B        | 1.01 | 7.15E-01 | 8.68E-01 | 1458.05  | not significant |
| 7837 | LINC01215    | 1.01 | 6.97E-01 | 8.59E-01 | 1004.05  | not significant |
| 7838 | LPAR5        | 1.01 | 7.01E-01 | 8.59E-01 | 1091.60  | not significant |
| 7839 | DNHD1        | 1.01 | 6.63E-01 | 8.41E-01 | 308.15   | not significant |
| 7840 | MAP3K7CL     | 1.01 | 6.26E-01 | 8.17E-01 | 161.76   | not significant |
| 7841 | OGN          | 1.01 | 6.78E-01 | 8.49E-01 | 256.57   | not significant |
| 7842 | HCK          | 1.01 | 2.65E-01 | NA       | 23.70    | not significant |
| 7843 | MIR4674HG    | 1.01 | 2.81E-01 | NA       | 25.60    | not significant |
| 7844 | BCAR3        | 1.01 | 1.42E-01 | NA       | 13.88    | not significant |
| 7845 | TERC         | 1.01 | 7.64E-02 | NA       | 9.74     | not significant |
| 7846 | LINC00618    | 1.01 | 9.99E-02 | NA       | 11.92    | not significant |
| 7847 | RPL27        | 1.01 | 7.03E-01 | 8.60E-01 | 13517.99 | not significant |
| 7848 | WBSR22       | 1.01 | 7.16E-01 | 8.69E-01 | 1737.04  | not significant |
| 7849 | ACOX1        | 1.01 | 6.97E-01 | 8.59E-01 | 2940.63  | not significant |
| 7850 | DUSP14       | 1.01 | 7.11E-01 | 8.65E-01 | 725.22   | not significant |
| 7851 | ATAD1        | 1.01 | 6.93E-01 | 8.56E-01 | 4578.35  | not significant |
| 7852 | HOXB4        | 1.01 | 6.87E-01 | NA       | 90.20    | not significant |
| 7853 | ULBP1        | 1.01 | 7.09E-01 | 8.64E-01 | 641.46   | not significant |
| 7854 | PORCN        | 1.01 | 4.35E-01 | NA       | 51.14    | not significant |
| 7855 | B3GNT9       | 1.01 | 4.94E-01 | NA       | 69.86    | not significant |
| 7856 | LOC100270804 | 1.01 | 3.59E-01 | NA       | 36.59    | not significant |
| 7857 | C16orf86     | 1.01 | 1.15E-01 | NA       | 12.20    | not significant |
| 7858 | LINC00324    | 1.01 | 3.29E-01 | NA       | 31.09    | not significant |
| 7859 | PSME1        | 1.01 | 6.98E-01 | 8.59E-01 | 10166.53 | not significant |
| 7860 | SMIM8        | 1.01 | 6.73E-01 | 8.47E-01 | 328.26   | not significant |
| 7861 | DOCK10       | 1.01 | 7.06E-01 | 8.62E-01 | 3659.25  | not significant |
| 7862 | COG5         | 1.01 | 7.09E-01 | 8.64E-01 | 1743.52  | not significant |
| 7863 | N6AMT1       | 1.01 | 6.59E-01 | 8.39E-01 | 252.02   | not significant |
| 7864 | FAM21C       | 1.01 | 6.45E-01 | 8.31E-01 | 210.81   | not significant |
| 7865 | ZNF77        | 1.01 | 6.47E-01 | 8.32E-01 | 217.47   | not significant |
| 7866 | SARDH        | 1.01 | 5.99E-01 | 8.02E-01 | 136.79   | not significant |
| 7867 | AGPAT4       | 1.01 | 5.32E-01 | NA       | 86.30    | not significant |
| 7868 | DDX11-AS1    | 1.01 | 1.74E-01 | NA       | 16.54    | not significant |
| 7869 | LUCAT1       | 1.01 | 5.19E-01 | NA       | 84.73    | not significant |
| 7870 | FN3K         | 1.01 | 3.60E-01 | NA       | 31.71    | not significant |
| 7871 | WDR31        | 1.01 | 1.22E-01 | NA       | 13.41    | not significant |
| 7872 | HARS2        | 1.01 | 7.00E-01 | 8.59E-01 | 1118.75  | not significant |
| 7873 | CMAHP        | 1.01 | 7.09E-01 | 8.64E-01 | 2396.60  | not significant |
| 7874 | STK10        | 1.01 | 7.05E-01 | 8.61E-01 | 2933.81  | not significant |
| 7875 | TRIM65       | 1.01 | 7.00E-01 | 8.59E-01 | 1956.78  | not significant |
| 7876 | NTPCR        | 1.01 | 6.81E-01 | 8.50E-01 | 940.94   | not significant |
| 7877 | ZNF682       | 1.01 | 6.73E-01 | 8.47E-01 | 287.50   | not significant |
| 7878 | KIAA0355     | 1.01 | 6.83E-01 | 8.51E-01 | 372.22   | not significant |
| 7879 | INAFM2       | 1.01 | 6.81E-01 | 8.50E-01 | 372.56   | not significant |
| 7880 | PACSIN1      | 1.01 | 6.31E-01 | 8.21E-01 | 186.33   | not significant |
| 7881 | ACYP2        | 1.01 | 5.66E-01 | 7.81E-01 | 109.56   | not significant |
| 7882 | PAPLN        | 1.01 | 3.82E-01 | NA       | 42.13    | not significant |
| 7883 | CACNA1C-AS1  | 1.01 | 2.10E-01 | NA       | 19.94    | not significant |
| 7884 | DUSP10       | 1.01 | 4.21E-01 | NA       | 53.04    | not significant |
| 7885 | ZBTB7C       | 1.01 | 3.38E-01 | NA       | 33.95    | not significant |
| 7886 | RRP7B        | 1.01 | 6.76E-01 | 8.48E-01 | 786.23   | not significant |
| 7887 | LETM2        | 1.01 | 6.37E-01 | 8.24E-01 | 230.36   | not significant |
| 7888 | ZDHHC23      | 1.01 | 6.73E-01 | 8.47E-01 | 370.01   | not significant |
| 7889 | ZKSCAN4      | 1.01 | 6.64E-01 | 8.42E-01 | 304.28   | not significant |
| 7890 | TMEM254-AS1  | 1.01 | 2.45E-01 | NA       | 23.13    | not significant |
| 7891 | SLC16A6      | 1.01 | 4.01E-01 | NA       | 46.81    | not significant |
| 7892 | PLCD1        | 1.01 | 3.94E-01 | NA       | 43.85    | not significant |
| 7893 | RAB1B        | 1.01 | 6.90E-01 | 8.54E-01 | 5985.50  | not significant |
| 7894 | GET4         | 1.01 | 7.02E-01 | 8.59E-01 | 2738.96  | not significant |
| 7895 | LIG3         | 1.01 | 7.27E-01 | 8.74E-01 | 2460.60  | not significant |
| 7896 | MIER3        | 1.01 | 7.04E-01 | 8.61E-01 | 1352.26  | not significant |
| 7897 | SAMD10       | 1.01 | 6.82E-01 | 8.51E-01 | 387.18   | not significant |
| 7898 | CD68         | 1.01 | 4.92E-01 | NA       | 75.08    | not significant |
| 7899 | KANSL1L      | 1.01 | 5.60E-01 | 7.77E-01 | 130.61   | not significant |
| 7900 | FLVCR1-AS1   | 1.01 | 2.92E-01 | NA       | 29.03    | not significant |
| 7901 | EVI5         | 1.01 | 5.41E-01 | 7.63E-01 | 110.37   | not significant |
| 7902 | RNLS         | 1.01 | 6.81E-01 | 8.50E-01 | 3178.63  | not significant |
| 7903 | STK40        | 1.01 | 6.70E-01 | 8.45E-01 | 3501.60  | not significant |
| 7904 | OGFOD2       | 1.01 | 6.87E-01 | 8.53E-01 | 1049.25  | not significant |
| 7905 | GTF3C1       | 1.01 | 6.80E-01 | 8.50E-01 | 5011.10  | not significant |
| 7906 | TMEM245      | 1.01 | 6.95E-01 | 8.57E-01 | 3265.28  | not significant |
| 7907 | C6orf120     | 1.01 | 7.00E-01 | 8.59E-01 | 1387.61  | not significant |

|      |              |      |          |          |          |                 |
|------|--------------|------|----------|----------|----------|-----------------|
| 7908 | EXTL3        | 1.01 | 6.90E-01 | 8.54E-01 | 2686.64  | not significant |
| 7909 | ATP2B1       | 1.01 | 6.82E-01 | 8.50E-01 | 2793.93  | not significant |
| 7910 | GNB5         | 1.01 | 6.73E-01 | 8.47E-01 | 786.08   | not significant |
| 7911 | STX12        | 1.01 | 6.79E-01 | 8.49E-01 | 747.52   | not significant |
| 7912 | TMCC1-AS1    | 1.01 | 5.25E-01 | NA       | 98.37    | not significant |
| 7913 | ADAT1        | 1.01 | 6.96E-01 | 8.58E-01 | 813.14   | not significant |
| 7914 | AKAP7        | 1.01 | 6.60E-01 | 8.39E-01 | 343.58   | not significant |
| 7915 | LINC00884    | 1.01 | 2.80E-01 | NA       | 26.58    | not significant |
| 7916 | TBX19        | 1.01 | 4.74E-01 | NA       | 70.70    | not significant |
| 7917 | CCDC90B      | 1.01 | 6.98E-01 | 8.59E-01 | 1208.97  | not significant |
| 7918 | LPXN         | 1.01 | 6.80E-01 | 8.50E-01 | 3032.79  | not significant |
| 7919 | BLOC1S1      | 1.01 | 6.81E-01 | 8.50E-01 | 464.10   | not significant |
| 7920 | DPM1         | 1.01 | 7.02E-01 | 8.59E-01 | 2103.48  | not significant |
| 7921 | WHSC1L1      | 1.01 | 6.83E-01 | 8.51E-01 | 4772.92  | not significant |
| 7922 | GSG2         | 1.01 | 6.99E-01 | 8.59E-01 | 1544.65  | not significant |
| 7923 | ARRDC1       | 1.01 | 6.73E-01 | 8.47E-01 | 561.13   | not significant |
| 7924 | PXMP4        | 1.01 | 6.94E-01 | 8.57E-01 | 697.37   | not significant |
| 7925 | GMPFB        | 1.01 | 6.59E-01 | 8.39E-01 | 892.13   | not significant |
| 7926 | BZRAP1       | 1.01 | 5.82E-01 | 7.90E-01 | 1445.06  | not significant |
| 7927 | SLC31A2      | 1.01 | 6.46E-01 | 8.31E-01 | 266.94   | not significant |
| 7928 | JPX          | 1.01 | 4.97E-01 | NA       | 97.06    | not significant |
| 7929 | DLL3         | 1.01 | 3.70E-01 | NA       | 45.03    | not significant |
| 7930 | PDCD1        | 1.01 | 5.47E-01 | 7.67E-01 | 110.06   | not significant |
| 7931 | FAM57B       | 1.01 | 3.85E-01 | NA       | 46.72    | not significant |
| 7932 | HSBP1        | 1.01 | 7.50E-01 | 8.87E-01 | 1895.20  | not significant |
| 7933 | C11orf73     | 1.01 | 7.32E-01 | 8.77E-01 | 1086.05  | not significant |
| 7934 | DOCK8        | 1.01 | 6.41E-01 | 8.28E-01 | 13489.66 | not significant |
| 7935 | MSL2         | 1.01 | 6.31E-01 | 8.21E-01 | 6025.73  | not significant |
| 7936 | CEP135       | 1.01 | 6.94E-01 | 8.56E-01 | 1533.12  | not significant |
| 7937 | XPA          | 1.01 | 6.81E-01 | 8.50E-01 | 474.18   | not significant |
| 7938 | CST7         | 1.01 | 5.87E-01 | 7.94E-01 | 226.66   | not significant |
| 7939 | CRTC1        | 1.01 | 6.79E-01 | 8.50E-01 | 452.01   | not significant |
| 7940 | CYP2E1       | 1.01 | 3.57E-01 | NA       | 42.49    | not significant |
| 7941 | CBX7         | 1.01 | 5.21E-01 | NA       | 93.27    | not significant |
| 7942 | TNFRSF10B    | 1.01 | 3.67E-01 | NA       | 48.07    | not significant |
| 7943 | MIOX         | 1.01 | 1.23E-01 | NA       | 14.11    | not significant |
| 7944 | DAP3         | 1.01 | 6.54E-01 | 8.36E-01 | 3941.26  | not significant |
| 7945 | SLC8B1       | 1.01 | 7.01E-01 | 8.59E-01 | 1170.25  | not significant |
| 7946 | TTC16        | 1.01 | 6.56E-01 | 8.38E-01 | 557.76   | not significant |
| 7947 | AIDA         | 1.01 | 6.78E-01 | 8.49E-01 | 594.02   | not significant |
| 7948 | PLEKHB1      | 1.01 | 6.12E-01 | 8.10E-01 | 212.12   | not significant |
| 7949 | PLEKHM3      | 1.01 | 6.65E-01 | 8.42E-01 | 573.90   | not significant |
| 7950 | RFESD        | 1.01 | 6.11E-01 | 8.09E-01 | 195.80   | not significant |
| 7951 | SLC25A25-AS1 | 1.01 | 6.30E-01 | 8.21E-01 | 244.86   | not significant |
| 7952 | KMT2E-AS1    | 1.01 | 5.19E-01 | NA       | 92.66    | not significant |
| 7953 | PSTK         | 1.01 | 5.89E-01 | 7.96E-01 | 153.56   | not significant |
| 7954 | ZBTB11-AS1   | 1.01 | 5.59E-01 | 7.77E-01 | 134.60   | not significant |
| 7955 | S1PR2        | 1.01 | 4.32E-01 | NA       | 59.07    | not significant |
| 7956 | NPTN-IT1     | 1.01 | 3.15E-01 | NA       | 39.03    | not significant |
| 7957 | C5           | 1.01 | 3.50E-01 | NA       | 38.40    | not significant |
| 7958 | SUB1         | 1.01 | 6.78E-01 | 8.49E-01 | 8842.27  | not significant |
| 7959 | TCHP         | 1.01 | 6.89E-01 | 8.54E-01 | 1673.01  | not significant |
| 7960 | C1orf122     | 1.01 | 6.89E-01 | 8.54E-01 | 962.28   | not significant |
| 7961 | C5orf24      | 1.01 | 6.90E-01 | 8.54E-01 | 1734.96  | not significant |
| 7962 | AGA          | 1.01 | 6.73E-01 | 8.47E-01 | 580.75   | not significant |
| 7963 | ELMSAN1      | 1.01 | 6.87E-01 | 8.53E-01 | 2374.46  | not significant |
| 7964 | TCEANC2      | 1.01 | 6.65E-01 | 8.42E-01 | 724.29   | not significant |
| 7965 | TRMT1L       | 1.01 | 6.84E-01 | 8.51E-01 | 1159.84  | not significant |
| 7966 | GLCC1        | 1.01 | 6.57E-01 | 8.38E-01 | 848.21   | not significant |
| 7967 | ADAM9        | 1.01 | 6.88E-01 | 8.53E-01 | 952.86   | not significant |
| 7968 | MSANTD2      | 1.01 | 6.50E-01 | 8.33E-01 | 283.27   | not significant |
| 7969 | LOC100506639 | 1.01 | 5.82E-01 | 7.90E-01 | 157.42   | not significant |
| 7970 | SRI          | 1.01 | 6.90E-01 | 8.54E-01 | 2701.10  | not significant |
| 7971 | MCM7         | 1.01 | 6.05E-01 | 8.05E-01 | 22452.07 | not significant |
| 7972 | COA5         | 1.01 | 7.30E-01 | 8.76E-01 | 732.35   | not significant |
| 7973 | FKBP2        | 1.01 | 6.87E-01 | 8.53E-01 | 934.60   | not significant |
| 7974 | ST3GAL2      | 1.01 | 6.95E-01 | 8.57E-01 | 1800.38  | not significant |
| 7975 | ATP2C1       | 1.01 | 6.62E-01 | 8.41E-01 | 3799.22  | not significant |
| 7976 | MTRF1        | 1.01 | 6.69E-01 | 8.45E-01 | 446.98   | not significant |
| 7977 | HIVEP2       | 1.01 | 6.89E-01 | 8.54E-01 | 2445.00  | not significant |
| 7978 | NDUFA13      | 1.01 | 7.02E-01 | 8.59E-01 | 4090.83  | not significant |
| 7979 | CARD16       | 1.01 | 6.00E-01 | 8.02E-01 | 202.15   | not significant |
| 7980 | WDR73        | 1.01 | 6.81E-01 | 8.50E-01 | 604.71   | not significant |
| 7981 | CELSR2       | 1.01 | 6.87E-01 | 8.53E-01 | 766.26   | not significant |
| 7982 | BACH2        | 1.01 | 6.56E-01 | 8.38E-01 | 400.79   | not significant |
| 7983 | CMTM1        | 1.01 | 6.03E-01 | 8.03E-01 | 200.75   | not significant |
| 7984 | LRRC16B      | 1.01 | 5.99E-01 | 8.02E-01 | 185.62   | not significant |
| 7985 | TBXAS1       | 1.01 | 4.74E-01 | NA       | 74.69    | not significant |
| 7986 | RTN4RL2      | 1.01 | 4.07E-01 | NA       | 50.54    | not significant |
| 7987 | SLC37A4      | 1.01 | 5.65E-01 | 7.80E-01 | 150.89   | not significant |
| 7988 | CHCHD5       | 1.01 | 5.29E-01 | 7.56E-01 | 116.87   | not significant |
| 7989 | PDCD6IPP2    | 1.01 | 4.01E-01 | NA       | 66.31    | not significant |
| 7990 | PSMB8-AS1    | 1.01 | 2.47E-01 | NA       | 26.77    | not significant |
| 7991 | RALGAPA1     | 1.01 | 4.31E-01 | NA       | 60.52    | not significant |
| 7992 | SPOCD1       | 1.01 | 3.61E-01 | NA       | 46.94    | not significant |
| 7993 | TMEM109      | 1.01 | 6.46E-01 | 8.31E-01 | 5645.63  | not significant |
| 7994 | DTNBP1       | 1.01 | 6.78E-01 | 8.49E-01 | 657.63   | not significant |
| 7995 | UBE2Q2       | 1.01 | 6.81E-01 | 8.50E-01 | 1527.32  | not significant |

|      |              |      |          |          |          |                 |
|------|--------------|------|----------|----------|----------|-----------------|
| 7996 | ARID4B       | 1.01 | 6.84E-01 | 8.52E-01 | 2165.04  | not significant |
| 7997 | ALG14        | 1.01 | 6.28E-01 | 8.19E-01 | 276.43   | not significant |
| 7998 | MTHFD2L      | 1.01 | 6.19E-01 | 8.14E-01 | 214.35   | not significant |
| 7999 | OSR2         | 1.01 | 4.84E-01 | NA       | 85.89    | not significant |
| 8000 | GRINA        | 1.01 | 6.19E-01 | 8.14E-01 | 226.24   | not significant |
| 8001 | SSC4D        | 1.01 | 2.01E-01 | NA       | 22.17    | not significant |
| 8002 | FAM86HP      | 1.01 | 2.74E-01 | NA       | 31.30    | not significant |
| 8003 | ZNF781       | 1.01 | 3.76E-01 | NA       | 47.90    | not significant |
| 8004 | SLC22A18     | 1.01 | 4.64E-01 | NA       | 76.35    | not significant |
| 8005 | NONO         | 1.01 | 6.24E-01 | 8.16E-01 | 27132.74 | not significant |
| 8006 | DOCK7        | 1.01 | 6.95E-01 | 8.58E-01 | 1246.03  | not significant |
| 8007 | RNF2         | 1.01 | 6.82E-01 | 8.51E-01 | 1298.81  | not significant |
| 8008 | NISCH        | 1.01 | 6.31E-01 | 8.21E-01 | 4807.94  | not significant |
| 8009 | ZNF354B      | 1.01 | 6.62E-01 | 8.41E-01 | 438.68   | not significant |
| 8010 | PLXND1       | 1.01 | 6.77E-01 | 8.48E-01 | 680.70   | not significant |
| 8011 | C15orf41     | 1.01 | 6.45E-01 | 8.31E-01 | 395.64   | not significant |
| 8012 | LOC728752    | 1.01 | 4.45E-01 | NA       | 72.60    | not significant |
| 8013 | MYCBPAP      | 1.01 | 2.70E-01 | NA       | 31.84    | not significant |
| 8014 | ADNP-AS1     | 1.01 | 5.35E-01 | 7.60E-01 | 2506.87  | not significant |
| 8015 | CERS2        | 1.01 | 6.34E-01 | 8.23E-01 | 7502.75  | not significant |
| 8016 | RIF1         | 1.01 | 6.62E-01 | 8.41E-01 | 6556.17  | not significant |
| 8017 | CSNK2A2      | 1.01 | 6.78E-01 | 8.49E-01 | 1550.10  | not significant |
| 8018 | ETFDH        | 1.01 | 6.75E-01 | 8.47E-01 | 613.83   | not significant |
| 8019 | TRPV1        | 1.01 | 6.18E-01 | 8.14E-01 | 241.23   | not significant |
| 8020 | TBCEL        | 1.01 | 6.55E-01 | 8.37E-01 | 423.37   | not significant |
| 8021 | LINC00563    | 1.01 | 4.70E-01 | NA       | 70.84    | not significant |
| 8022 | LINC01137    | 1.01 | 1.60E-01 | NA       | 19.53    | not significant |
| 8023 | ABCC2        | 1.01 | 5.20E-01 | 7.50E-01 | 107.05   | not significant |
| 8024 | EFEMP2       | 1.01 | 2.96E-01 | NA       | 34.27    | not significant |
| 8025 | TMEM91       | 1.01 | 2.35E-01 | NA       | 25.64    | not significant |
| 8026 | LOC728730    | 1.01 | 2.86E-01 | NA       | 32.66    | not significant |
| 8027 | LIN54        | 1.01 | 6.69E-01 | 8.45E-01 | 2108.15  | not significant |
| 8028 | SIN3B        | 1.01 | 6.76E-01 | 8.48E-01 | 1691.93  | not significant |
| 8029 | TCEAL1       | 1.01 | 5.15E-01 | 7.46E-01 | 119.39   | not significant |
| 8030 | SERTAD3      | 1.01 | 5.50E-01 | 7.70E-01 | 107.41   | not significant |
| 8031 | ZNF169       | 1.01 | 4.21E-01 | NA       | 60.75    | not significant |
| 8032 | ZNF487       | 1.01 | 2.83E-01 | NA       | 33.16    | not significant |
| 8033 | SEPSECS-AS1  | 1.01 | 2.23E-01 | NA       | 25.07    | not significant |
| 8034 | ZNF93        | 1.01 | 6.53E-01 | 8.36E-01 | 827.34   | not significant |
| 8035 | LOC101927021 | 1.01 | 5.68E-01 | 7.82E-01 | 152.53   | not significant |
| 8036 | GAREML       | 1.01 | 6.08E-01 | 8.07E-01 | 218.13   | not significant |
| 8037 | GIMAP5       | 1.01 | 2.66E-01 | NA       | 36.16    | not significant |
| 8038 | DFNB59       | 1.01 | 2.30E-01 | NA       | 26.29    | not significant |
| 8039 | PPP1R13B     | 1.01 | 4.09E-01 | NA       | 57.30    | not significant |
| 8040 | EGR2         | 1.01 | 1.38E-01 | NA       | 19.99    | not significant |
| 8041 | LIN52        | 1.01 | 6.69E-01 | 8.45E-01 | 693.21   | not significant |
| 8042 | SDR39U1      | 1.01 | 6.87E-01 | 8.53E-01 | 1243.10  | not significant |
| 8043 | ZYX          | 1.01 | 6.44E-01 | 8.30E-01 | 535.16   | not significant |
| 8044 | PHF12        | 1.01 | 6.71E-01 | 8.46E-01 | 2176.20  | not significant |
| 8045 | SYNJ1        | 1.01 | 6.85E-01 | 8.52E-01 | 1033.19  | not significant |
| 8046 | ZNF571       | 1.01 | 5.25E-01 | 7.54E-01 | 115.53   | not significant |
| 8047 | PRORSD1P     | 1.01 | 2.48E-01 | NA       | 29.21    | not significant |
| 8048 | LOC101927621 | 1.01 | 3.56E-01 | NA       | 50.38    | not significant |
| 8049 | TMEM30A      | 1.01 | 6.35E-01 | 8.23E-01 | 4989.50  | not significant |
| 8050 | BANP         | 1.01 | 6.57E-01 | 8.39E-01 | 625.86   | not significant |
| 8051 | TSHR         | 1.01 | 6.72E-01 | 8.46E-01 | 1192.47  | not significant |
| 8052 | LINC00094    | 1.01 | 6.68E-01 | 8.44E-01 | 677.89   | not significant |
| 8053 | IKBKE        | 1.01 | 6.46E-01 | 8.32E-01 | 415.50   | not significant |
| 8054 | RNASEH1-AS1  | 1.01 | 6.08E-01 | 8.07E-01 | 372.70   | not significant |
| 8055 | CCR2         | 1.01 | 1.62E-01 | NA       | 20.51    | not significant |
| 8056 | PACSIN3      | 1.01 | 5.23E-01 | 7.52E-01 | 113.52   | not significant |
| 8057 | LOC729603    | 1.01 | 3.88E-01 | NA       | 67.00    | not significant |
| 8058 | PLCG2        | 1.01 | 3.95E-01 | NA       | 56.93    | not significant |
| 8059 | RGPD1        | 1.01 | 4.77E-01 | NA       | 92.36    | not significant |
| 8060 | LINC01011    | 1.01 | 9.62E-02 | NA       | 14.38    | not significant |
| 8061 | SLC9B1       | 1.01 | 1.39E-01 | NA       | 19.70    | not significant |
| 8062 | TMTC2        | 1.01 | 1.48E-01 | NA       | 19.55    | not significant |
| 8063 | PMAIP1       | 1.01 | 6.43E-01 | 8.30E-01 | 4185.81  | not significant |
| 8064 | PEX26        | 1.01 | 6.45E-01 | 8.31E-01 | 2677.76  | not significant |
| 8065 | RPL19        | 1.01 | 6.14E-01 | 8.11E-01 | 39980.31 | not significant |
| 8066 | TTC21B       | 1.01 | 6.56E-01 | 8.38E-01 | 1200.23  | not significant |
| 8067 | BIN3         | 1.01 | 6.40E-01 | 8.27E-01 | 1081.90  | not significant |
| 8068 | SPHK2        | 1.01 | 6.85E-01 | 8.52E-01 | 1242.11  | not significant |
| 8069 | TNKS         | 1.01 | 6.64E-01 | 8.41E-01 | 2177.21  | not significant |
| 8070 | SETD4        | 1.01 | 6.53E-01 | 8.36E-01 | 495.54   | not significant |
| 8071 | LOC100287042 | 1.01 | 5.50E-01 | 7.70E-01 | 143.44   | not significant |
| 8072 | WASL         | 1.01 | 6.45E-01 | 8.31E-01 | 466.03   | not significant |
| 8073 | ATP2B4       | 1.01 | 4.63E-01 | 7.09E-01 | 8137.39  | not significant |
| 8074 | TCTN1        | 1.01 | 5.65E-01 | 7.80E-01 | 168.52   | not significant |
| 8075 | LINC00664    | 1.01 | 5.13E-01 | 7.45E-01 | 117.36   | not significant |
| 8076 | GPLD1        | 1.01 | 4.42E-01 | NA       | 81.92    | not significant |
| 8077 | DAB1         | 1.01 | 1.65E-01 | NA       | 20.53    | not significant |
| 8078 | PLEKHH2      | 1.01 | 2.11E-01 | NA       | 26.00    | not significant |
| 8079 | GGA1         | 1.01 | 6.65E-01 | 8.42E-01 | 1557.37  | not significant |
| 8080 | STK24        | 1.01 | 6.04E-01 | 8.04E-01 | 5995.50  | not significant |
| 8081 | DCAF11       | 1.01 | 6.35E-01 | 8.23E-01 | 3297.39  | not significant |
| 8082 | PITPNC1      | 1.01 | 6.59E-01 | 8.39E-01 | 2188.38  | not significant |
| 8083 | USP4         | 1.01 | 6.16E-01 | 8.12E-01 | 2525.44  | not significant |

|      |              |      |          |          |          |                 |
|------|--------------|------|----------|----------|----------|-----------------|
| 8084 | EDEM3        | 1.01 | 6.59E-01 | 8.39E-01 | 3825.21  | not significant |
| 8085 | FAM117B      | 1.01 | 6.33E-01 | 8.22E-01 | 1073.85  | not significant |
| 8086 | DUSP2        | 1.01 | 6.38E-01 | 8.25E-01 | 771.81   | not significant |
| 8087 | RPL23AP53    | 1.01 | 6.65E-01 | 8.42E-01 | 845.14   | not significant |
| 8088 | IFT172       | 1.01 | 6.22E-01 | 8.15E-01 | 307.97   | not significant |
| 8089 | TMEM198B     | 1.01 | 6.31E-01 | 8.21E-01 | 354.93   | not significant |
| 8090 | ITGA2        | 1.01 | 6.21E-01 | 8.15E-01 | 327.91   | not significant |
| 8091 | IL15RA       | 1.01 | 6.10E-01 | 8.08E-01 | 285.01   | not significant |
| 8092 | SNX24        | 1.01 | 3.86E-01 | NA       | 58.76    | not significant |
| 8093 | LOC100506472 | 1.01 | 3.78E-01 | NA       | 56.09    | not significant |
| 8094 | LINC00663    | 1.01 | 2.18E-01 | NA       | 25.74    | not significant |
| 8095 | SNHG5        | 1.01 | 7.09E-01 | 8.64E-01 | 794.00   | not significant |
| 8096 | HENMT1       | 1.01 | 6.59E-01 | 8.39E-01 | 1526.15  | not significant |
| 8097 | SPTAN1       | 1.01 | 6.54E-01 | 8.37E-01 | 12764.16 | not significant |
| 8098 | NCAPD3       | 1.01 | 6.18E-01 | 8.14E-01 | 7917.74  | not significant |
| 8099 | UBLCP1       | 1.01 | 6.60E-01 | 8.40E-01 | 1711.71  | not significant |
| 8100 | CCDC174      | 1.01 | 6.63E-01 | 8.41E-01 | 889.34   | not significant |
| 8101 | SLC39A11     | 1.01 | 6.35E-01 | 8.23E-01 | 1044.23  | not significant |
| 8102 | ZNF615       | 1.01 | 6.48E-01 | 8.32E-01 | 466.17   | not significant |
| 8103 | ZBTB41       | 1.01 | 6.24E-01 | 8.16E-01 | 1026.70  | not significant |
| 8104 | FAHD1        | 1.01 | 6.27E-01 | 8.19E-01 | 552.99   | not significant |
| 8105 | FAM86A       | 1.01 | 6.28E-01 | 8.19E-01 | 341.43   | not significant |
| 8106 | GUCY1A2      | 1.01 | 3.60E-01 | NA       | 54.51    | not significant |
| 8107 | CCDC85B      | 1.01 | 5.91E-01 | 7.97E-01 | 1179.17  | not significant |
| 8108 | LCAT         | 1.01 | 4.77E-01 | 7.18E-01 | 107.26   | not significant |
| 8109 | ADSSL1       | 1.01 | 2.31E-01 | NA       | 29.37    | not significant |
| 8110 | TOB1-AS1     | 1.01 | 8.24E-02 | NA       | 13.60    | not significant |
| 8111 | TMSB15B      | 1.01 | 3.85E-01 | NA       | 61.01    | not significant |
| 8112 | HIST1H2AG    | 1.01 | 2.16E-01 | NA       | 33.23    | not significant |
| 8113 | PMS2P4       | 1.01 | 3.52E-01 | NA       | 49.36    | not significant |
| 8114 | MF12-AS1     | 1.01 | 2.56E-01 | NA       | 31.79    | not significant |
| 8115 | NRADDP       | 1.01 | 5.46E-02 | NA       | 12.71    | not significant |
| 8116 | H2AFZ        | 1.01 | 6.23E-01 | 8.16E-01 | 16359.25 | not significant |
| 8117 | CYP20A1      | 1.01 | 6.62E-01 | 8.41E-01 | 1199.35  | not significant |
| 8118 | KATNBL1      | 1.01 | 6.30E-01 | 8.21E-01 | 768.04   | not significant |
| 8119 | SLC35F5      | 1.01 | 4.90E-01 | 7.29E-01 | 702.43   | not significant |
| 8120 | GS1-24F4.2   | 1.01 | 3.80E-01 | NA       | 58.00    | not significant |
| 8121 | NPIPA5       | 1.01 | 5.18E-01 | 7.48E-01 | 136.25   | not significant |
| 8122 | LINC01481    | 1.01 | 4.53E-01 | NA       | 83.68    | not significant |
| 8123 | E4F1         | 1.01 | 6.73E-01 | 8.47E-01 | 1244.69  | not significant |
| 8124 | CCDC12       | 1.01 | 6.58E-01 | 8.39E-01 | 1258.49  | not significant |
| 8125 | GM2A         | 1.01 | 6.49E-01 | 8.32E-01 | 1658.86  | not significant |
| 8126 | REST         | 1.01 | 5.90E-01 | 7.96E-01 | 3137.44  | not significant |
| 8127 | ZNF669       | 1.01 | 6.38E-01 | 8.25E-01 | 555.50   | not significant |
| 8128 | FAM220A      | 1.01 | 6.48E-01 | 8.32E-01 | 634.44   | not significant |
| 8129 | CD55         | 1.01 | 6.11E-01 | 8.09E-01 | 310.28   | not significant |
| 8130 | SLC16A1-AS1  | 1.01 | 5.26E-01 | 7.54E-01 | 322.96   | not significant |
| 8131 | DLEU2L       | 1.01 | 1.23E-01 | NA       | 18.21    | not significant |
| 8132 | ACAD11       | 1.01 | 3.27E-01 | NA       | 45.24    | not significant |
| 8133 | NDUFB4       | 1.01 | 6.60E-01 | 8.39E-01 | 2560.37  | not significant |
| 8134 | PAPSS1       | 1.01 | 6.54E-01 | 8.36E-01 | 2394.66  | not significant |
| 8135 | PRKD2        | 1.01 | 6.21E-01 | 8.15E-01 | 3768.93  | not significant |
| 8136 | MRPS18A      | 1.01 | 6.53E-01 | 8.35E-01 | 1188.21  | not significant |
| 8137 | NXT1         | 1.01 | 6.40E-01 | 8.27E-01 | 1469.04  | not significant |
| 8138 | PARP4        | 1.01 | 6.31E-01 | 8.21E-01 | 4094.60  | not significant |
| 8139 | SMIM7        | 1.01 | 6.66E-01 | 8.43E-01 | 1413.31  | not significant |
| 8140 | KIAA0319L    | 1.01 | 6.48E-01 | 8.32E-01 | 1208.26  | not significant |
| 8141 | GFOD1        | 1.01 | 5.97E-01 | 8.02E-01 | 217.73   | not significant |
| 8142 | ZNF215       | 1.01 | 6.44E-01 | 8.30E-01 | 506.53   | not significant |
| 8143 | ZBTB45       | 1.01 | 6.31E-01 | 8.21E-01 | 394.81   | not significant |
| 8144 | CCDC142      | 1.01 | 6.37E-01 | 8.24E-01 | 404.33   | not significant |
| 8145 | CYB5D2       | 1.01 | 5.78E-01 | 7.88E-01 | 201.58   | not significant |
| 8146 | SLC16A7      | 1.01 | 5.98E-01 | 8.02E-01 | 2146.39  | not significant |
| 8147 | NLRP1        | 1.01 | 6.06E-01 | 8.06E-01 | 335.54   | not significant |
| 8148 | IGFLR1       | 1.01 | 5.17E-01 | 7.47E-01 | 126.53   | not significant |
| 8149 | ROMO1        | 1.01 | 5.75E-01 | 7.85E-01 | 1256.61  | not significant |
| 8150 | PROX1        | 1.01 | 3.99E-01 | NA       | 64.77    | not significant |
| 8151 | RILP         | 1.01 | 2.27E-01 | NA       | 29.32    | not significant |
| 8152 | TADA3        | 1.01 | 7.13E-01 | 8.67E-01 | 1905.08  | not significant |
| 8153 | SLC39A3      | 1.01 | 6.54E-01 | 8.37E-01 | 1690.37  | not significant |
| 8154 | RFTN1        | 1.01 | 6.49E-01 | 8.32E-01 | 1807.41  | not significant |
| 8155 | MARK2        | 1.01 | 6.43E-01 | 8.30E-01 | 3036.39  | not significant |
| 8156 | ACTR10       | 1.01 | 6.32E-01 | 8.22E-01 | 1160.73  | not significant |
| 8157 | JPH1         | 1.01 | 6.56E-01 | 8.37E-01 | 1522.76  | not significant |
| 8158 | CEP104       | 1.01 | 6.28E-01 | 8.19E-01 | 1929.86  | not significant |
| 8159 | PLEKHA3      | 1.01 | 6.34E-01 | 8.23E-01 | 731.97   | not significant |
| 8160 | ISCA2        | 1.01 | 6.23E-01 | 8.16E-01 | 798.28   | not significant |
| 8161 | NCOA3        | 1.01 | 6.56E-01 | 8.37E-01 | 1743.59  | not significant |
| 8162 | LINC00634    | 1.01 | 2.53E-01 | NA       | 33.23    | not significant |
| 8163 | RPPH1        | 1.01 | 1.57E-01 | NA       | 29.23    | not significant |
| 8164 | MGMT         | 1.01 | 6.40E-01 | 8.27E-01 | 859.60   | not significant |
| 8165 | CIC          | 1.01 | 6.35E-01 | 8.23E-01 | 3157.20  | not significant |
| 8166 | PHF13        | 1.01 | 6.51E-01 | 8.34E-01 | 1358.37  | not significant |
| 8167 | LIN9         | 1.01 | 6.36E-01 | 8.24E-01 | 989.32   | not significant |
| 8168 | NBAS         | 1.01 | 6.47E-01 | 8.32E-01 | 1713.99  | not significant |
| 8169 | FAHD2A       | 1.01 | 6.48E-01 | 8.32E-01 | 711.60   | not significant |
| 8170 | RBM45        | 1.01 | 6.34E-01 | 8.23E-01 | 487.50   | not significant |
| 8171 | FAM83F       | 1.01 | 4.31E-01 | NA       | 86.81    | not significant |



|      |              |      |          |          |           |                 |
|------|--------------|------|----------|----------|-----------|-----------------|
| 8172 | NDUFA4L2     | 1.01 | 1.92E-01 | NA       | 27.19     | not significant |
| 8173 | LEF1         | 1.01 | 5.39E-01 | 7.62E-01 | 19810.41  | not significant |
| 8174 | GAA          | 1.01 | 6.14E-01 | 8.11E-01 | 1068.44   | not significant |
| 8175 | ZNF419       | 1.01 | 6.04E-01 | 8.04E-01 | 325.15    | not significant |
| 8176 | ARL11        | 1.01 | 6.07E-01 | 8.07E-01 | 334.73    | not significant |
| 8177 | KCNRG        | 1.01 | 2.77E-01 | NA       | 37.69     | not significant |
| 8178 | KIF27        | 1.01 | 5.10E-01 | 7.44E-01 | 130.91    | not significant |
| 8179 | CYP2R1       | 1.01 | 4.13E-01 | NA       | 71.51     | not significant |
| 8180 | CAMK2N2      | 1.01 | 2.68E-01 | NA       | 39.59     | not significant |
| 8181 | NR3C1        | 1.01 | 6.33E-01 | 8.22E-01 | 1962.92   | not significant |
| 8182 | GALK1        | 1.01 | 6.47E-01 | 8.32E-01 | 1358.32   | not significant |
| 8183 | DMTF1        | 1.01 | 6.44E-01 | 8.30E-01 | 2738.59   | not significant |
| 8184 | NDUFA11      | 1.01 | 6.13E-01 | 8.10E-01 | 3040.27   | not significant |
| 8185 | PMS2P5       | 1.01 | 4.86E-01 | 7.26E-01 | 118.94    | not significant |
| 8186 | CPEB3        | 1.01 | 5.23E-01 | 7.52E-01 | 144.60    | not significant |
| 8187 | YBEY         | 1.01 | 5.36E-01 | 7.61E-01 | 157.63    | not significant |
| 8188 | SYCE2        | 1.01 | 3.80E-01 | NA       | 64.54     | not significant |
| 8189 | CD274        | 1.01 | 2.04E-03 | 2.14E-02 | 318.50    | not significant |
| 8190 | CACNA1A      | 1.01 | 6.45E-02 | NA       | 13.63     | not significant |
| 8191 | PLEKHA7      | 1.01 | 4.19E-01 | NA       | 78.66     | not significant |
| 8192 | MERTK        | 1.01 | 3.46E-01 | NA       | 54.24     | not significant |
| 8193 | CACNA2D4     | 1.01 | 2.49E-01 | NA       | 34.54     | not significant |
| 8194 | ANXA7        | 1.01 | 6.21E-01 | 8.15E-01 | 3208.63   | not significant |
| 8195 | HAX1         | 1.01 | 6.32E-01 | 8.22E-01 | 3196.51   | not significant |
| 8196 | THYN1        | 1.01 | 6.32E-01 | 8.22E-01 | 1960.68   | not significant |
| 8197 | ZMYND8       | 1.01 | 6.03E-01 | 8.04E-01 | 1051.56   | not significant |
| 8198 | CPNE2        | 1.01 | 5.75E-01 | 7.86E-01 | 231.89    | not significant |
| 8199 | HNRNPA1L2    | 1.01 | 6.31E-01 | 8.21E-01 | 476.20    | not significant |
| 8200 | KSR1         | 1.01 | 5.29E-01 | 7.56E-01 | 160.09    | not significant |
| 8201 | SEPN1        | 1.01 | 3.81E-01 | NA       | 66.20     | not significant |
| 8202 | ZCCHC5       | 1.01 | 1.53E-01 | NA       | 27.02     | not significant |
| 8203 | LOC100131289 | 1.01 | 2.10E-01 | NA       | 30.09     | not significant |
| 8204 | ORAI2        | 1.01 | 6.09E-01 | 8.08E-01 | 3445.31   | not significant |
| 8205 | BCL7A        | 1.01 | 6.31E-01 | 8.21E-01 | 3131.55   | not significant |
| 8206 | THADA        | 1.01 | 6.33E-01 | 8.22E-01 | 2173.94   | not significant |
| 8207 | TPRG1L       | 1.01 | 6.39E-01 | 8.26E-01 | 767.66    | not significant |
| 8208 | GOLGA2       | 1.01 | 6.41E-01 | 8.28E-01 | 1704.11   | not significant |
| 8209 | METT18       | 1.01 | 6.24E-01 | 8.16E-01 | 469.47    | not significant |
| 8210 | PPP1R21      | 1.01 | 6.18E-01 | 8.14E-01 | 563.99    | not significant |
| 8211 | SLC25A42     | 1.01 | 6.19E-01 | 8.14E-01 | 533.83    | not significant |
| 8212 | PDK2         | 1.01 | 5.67E-01 | 7.81E-01 | 227.22    | not significant |
| 8213 | LHPP         | 1.01 | 5.95E-01 | 7.99E-01 | 289.66    | not significant |
| 8214 | PHLPP1       | 1.01 | 5.29E-01 | 7.56E-01 | 154.29    | not significant |
| 8215 | EMC6         | 1.01 | 5.58E-01 | 7.76E-01 | 1406.70   | not significant |
| 8216 | EFCAB5       | 1.01 | 3.46E-01 | NA       | 61.64     | not significant |
| 8217 | LOC440311    | 1.01 | 2.39E-01 | NA       | 34.32     | not significant |
| 8218 | ARF5         | 1.01 | 6.31E-01 | 8.21E-01 | 3151.79   | not significant |
| 8219 | CABLES2      | 1.01 | 6.03E-01 | 8.03E-01 | 1071.71   | not significant |
| 8220 | GXYLT1       | 1.01 | 6.38E-01 | 8.25E-01 | 2097.72   | not significant |
| 8221 | IFT74        | 1.01 | 5.89E-01 | 7.96E-01 | 306.60    | not significant |
| 8222 | SPAG1        | 1.01 | 6.21E-01 | 8.15E-01 | 470.54    | not significant |
| 8223 | LINC00659    | 1.01 | 4.98E-01 | 7.35E-01 | 135.72    | not significant |
| 8224 | PTH1H        | 1.01 | 1.26E-01 | NA       | 20.37     | not significant |
| 8225 | ANP32C       | 1.01 | 1.87E-01 | NA       | 28.48     | not significant |
| 8226 | KCMF1        | 1.01 | 6.91E-01 | 8.54E-01 | 1840.38   | not significant |
| 8227 | POLR2G       | 1.01 | 6.22E-01 | 8.15E-01 | 3061.90   | not significant |
| 8228 | C21orf33     | 1.01 | 6.33E-01 | 8.22E-01 | 1190.45   | not significant |
| 8229 | OSTF1        | 1.01 | 6.41E-01 | 8.28E-01 | 1791.06   | not significant |
| 8230 | ABI2         | 1.01 | 5.60E-01 | 7.77E-01 | 6363.72   | not significant |
| 8231 | PALM         | 1.01 | 2.16E-01 | NA       | 33.47     | not significant |
| 8232 | HERC2P3      | 1.01 | 8.82E-02 | NA       | 17.23     | not significant |
| 8233 | CCDC24       | 1.01 | 1.03E-01 | NA       | 18.61     | not significant |
| 8234 | IMMT         | 1.01 | 5.92E-01 | 7.98E-01 | 5766.73   | not significant |
| 8235 | HSPA8        | 1.01 | 5.34E-01 | 7.59E-01 | 130805.42 | not significant |
| 8236 | USP15        | 1.01 | 5.97E-01 | 8.02E-01 | 4204.47   | not significant |
| 8237 | UBA6         | 1.01 | 6.11E-01 | 8.09E-01 | 3391.53   | not significant |
| 8238 | ALG13        | 1.01 | 6.30E-01 | 8.21E-01 | 1213.71   | not significant |
| 8239 | VOPP1        | 1.01 | 6.29E-01 | 8.20E-01 | 628.56    | not significant |
| 8240 | MKRN3        | 1.01 | 5.84E-01 | 7.92E-01 | 323.84    | not significant |
| 8241 | PON2         | 1.01 | 5.50E-01 | 7.70E-01 | 212.77    | not significant |
| 8242 | GGACTION     | 1.01 | 2.37E-01 | NA       | 36.76     | not significant |
| 8243 | NHLRC4       | 1.01 | 1.42E-01 | NA       | 22.31     | not significant |
| 8244 | TUFT1        | 1.01 | 1.01E-01 | NA       | 19.58     | not significant |
| 8245 | ACP1         | 1.01 | 5.99E-01 | 8.02E-01 | 5575.53   | not significant |
| 8246 | SIPA1L3      | 1.01 | 6.32E-01 | 8.22E-01 | 1526.36   | not significant |
| 8247 | RAB9B        | 1.01 | 6.00E-01 | 8.02E-01 | 364.45    | not significant |
| 8248 | GUSBP11      | 1.01 | 6.13E-01 | 8.10E-01 | 769.54    | not significant |
| 8249 | FAM24B       | 1.01 | 5.04E-01 | 7.39E-01 | 176.86    | not significant |
| 8250 | AMOTL1       | 1.01 | 5.61E-01 | 7.78E-01 | 219.57    | not significant |
| 8251 | GADD45GIP1   | 1.01 | 5.54E-01 | 7.72E-01 | 2313.78   | not significant |
| 8252 | EPS8L1       | 1.01 | 4.74E-01 | 7.17E-01 | 124.58    | not significant |
| 8253 | PMS2P3       | 1.01 | 4.58E-01 | 7.05E-01 | 114.59    | not significant |
| 8254 | HIST1H2BK    | 1.01 | 4.57E-01 | 7.05E-01 | 125.25    | not significant |
| 8255 | FAM53A       | 1.01 | 1.98E-01 | NA       | 33.73     | not significant |
| 8256 | HSD17B1      | 1.01 | 6.51E-02 | NA       | 15.01     | not significant |
| 8257 | TCF7         | 1.01 | 5.26E-01 | 7.54E-01 | 20912.83  | not significant |
| 8258 | ELP3         | 1.01 | 6.29E-01 | 8.20E-01 | 1896.78   | not significant |
| 8259 | PPT1         | 1.01 | 5.71E-01 | 7.83E-01 | 7329.03   | not significant |

|      |              |      |          |          |          |                 |
|------|--------------|------|----------|----------|----------|-----------------|
| 8260 | LDB1         | 1.01 | 6.19E-01 | 8.14E-01 | 3503.21  | not significant |
| 8261 | NUMB         | 1.01 | 6.18E-01 | 8.14E-01 | 2991.32  | not significant |
| 8262 | TACO1        | 1.01 | 6.27E-01 | 8.19E-01 | 1354.15  | not significant |
| 8263 | DTD2         | 1.01 | 6.22E-01 | 8.15E-01 | 681.15   | not significant |
| 8264 | PPP2R5B      | 1.01 | 6.06E-01 | 8.06E-01 | 409.05   | not significant |
| 8265 | NBEA         | 1.01 | 5.42E-01 | 7.64E-01 | 245.55   | not significant |
| 8266 | HPDL         | 1.01 | 5.00E-01 | 7.36E-01 | 169.74   | not significant |
| 8267 | NRM          | 1.01 | 4.65E-01 | 7.11E-01 | 123.13   | not significant |
| 8268 | CCT6P3       | 1.01 | 4.65E-01 | 7.11E-01 | 123.62   | not significant |
| 8269 | LINC00051    | 1.01 | 2.30E-01 | NA       | 36.20    | not significant |
| 8270 | PLEKHH3      | 1.01 | 2.82E-02 | NA       | 11.12    | not significant |
| 8271 | TGOLN2       | 1.01 | 7.30E-01 | 8.76E-01 | 9187.07  | not significant |
| 8272 | VRK1         | 1.01 | 6.09E-01 | 8.07E-01 | 3072.50  | not significant |
| 8273 | URM1         | 1.01 | 6.22E-01 | 8.15E-01 | 2560.75  | not significant |
| 8274 | VPS39        | 1.01 | 6.34E-01 | 8.23E-01 | 1767.83  | not significant |
| 8275 | MTR          | 1.01 | 6.69E-01 | 8.44E-01 | 2072.13  | not significant |
| 8276 | GOLPH3L      | 1.01 | 6.17E-01 | 8.13E-01 | 1147.60  | not significant |
| 8277 | FLCN         | 1.01 | 6.28E-01 | 8.19E-01 | 1144.68  | not significant |
| 8278 | ZNF830       | 1.01 | 6.22E-01 | 8.15E-01 | 650.17   | not significant |
| 8279 | PCYOX1L      | 1.01 | 5.98E-01 | 8.02E-01 | 457.26   | not significant |
| 8280 | LINC01232    | 1.01 | 3.01E-01 | NA       | 50.63    | not significant |
| 8281 | SRY          | 1.01 | 1.76E-01 | NA       | 29.89    | not significant |
| 8282 | LOC100130950 | 1.01 | 3.26E-02 | NA       | 11.08    | not significant |
| 8283 | GUSBP3       | 1.01 | 2.89E-01 | NA       | 55.69    | not significant |
| 8284 | PROB1        | 1.01 | 2.76E-01 | NA       | 45.67    | not significant |
| 8285 | PIK3IP1      | 1.01 | 1.83E-01 | NA       | 33.15    | not significant |
| 8286 | H2AFY        | 1.01 | 5.77E-01 | 7.87E-01 | 18257.78 | not significant |
| 8287 | SUMO3        | 1.01 | 5.97E-01 | 8.02E-01 | 3973.44  | not significant |
| 8288 | RPS18        | 1.01 | 7.30E-01 | 8.76E-01 | 19196.03 | not significant |
| 8289 | MYEOV2       | 1.01 | 5.69E-01 | 7.83E-01 | 1581.91  | not significant |
| 8290 | KIAA1161     | 1.01 | 5.49E-01 | 7.69E-01 | 262.10   | not significant |
| 8291 | ULK4         | 1.01 | 5.24E-01 | 7.52E-01 | 187.24   | not significant |
| 8292 | NRL          | 1.01 | 4.18E-01 | NA       | 85.88    | not significant |
| 8293 | MBLAC1       | 1.01 | 4.07E-01 | NA       | 81.92    | not significant |
| 8294 | MX2          | 1.01 | 2.40E-01 | NA       | 37.67    | not significant |
| 8295 | MRFAP1       | 1.01 | 6.00E-01 | 8.02E-01 | 4281.14  | not significant |
| 8296 | RCBTB2       | 1.01 | 5.36E-01 | 7.61E-01 | 21475.33 | not significant |
| 8297 | NDNL2        | 1.01 | 6.13E-01 | 8.10E-01 | 851.87   | not significant |
| 8298 | SKIV2L       | 1.01 | 6.23E-01 | 8.15E-01 | 762.62   | not significant |
| 8299 | KCTD7        | 1.01 | 5.97E-01 | 8.02E-01 | 714.55   | not significant |
| 8300 | DFFB         | 1.01 | 5.73E-01 | 7.84E-01 | 310.19   | not significant |
| 8301 | TYMSOS       | 1.01 | 3.83E-01 | NA       | 77.58    | not significant |
| 8302 | LRRC37A3     | 1.01 | 2.02E-01 | NA       | 37.83    | not significant |
| 8303 | RSAD1        | 1.01 | 6.93E-01 | 8.55E-01 | 1830.04  | not significant |
| 8304 | HMG2         | 1.01 | 5.64E-01 | 7.79E-01 | 19110.93 | not significant |
| 8305 | PGRMC1       | 1.01 | 6.01E-01 | 8.02E-01 | 2461.80  | not significant |
| 8306 | USP9X        | 1.01 | 6.05E-01 | 8.05E-01 | 4543.06  | not significant |
| 8307 | MTFR1        | 1.01 | 6.09E-01 | 8.08E-01 | 629.00   | not significant |
| 8308 | PKN2         | 1.01 | 6.53E-01 | 8.35E-01 | 1715.34  | not significant |
| 8309 | MORC4        | 1.01 | 6.11E-01 | 8.09E-01 | 649.93   | not significant |
| 8310 | TMEM180      | 1.01 | 6.00E-01 | 8.02E-01 | 590.23   | not significant |
| 8311 | SVIL         | 1.01 | 6.20E-01 | 8.15E-01 | 850.02   | not significant |
| 8312 | IL15         | 1.01 | 5.22E-01 | 7.51E-01 | 220.92   | not significant |
| 8313 | SERPINI1     | 1.01 | 1.32E-01 | NA       | 24.12    | not significant |
| 8314 | UQCR10       | 1.01 | 6.11E-01 | 8.09E-01 | 2735.54  | not significant |
| 8315 | TPRKB        | 1.01 | 6.06E-01 | 8.06E-01 | 1181.61  | not significant |
| 8316 | BCL11B       | 1.01 | 5.93E-01 | 7.98E-01 | 8407.58  | not significant |
| 8317 | DEDD2        | 1.01 | 5.96E-01 | 8.01E-01 | 794.63   | not significant |
| 8318 | MSL3         | 1.01 | 6.18E-01 | 8.14E-01 | 1003.98  | not significant |
| 8319 | IRF2BPL      | 1.01 | 6.13E-01 | 8.10E-01 | 1611.31  | not significant |
| 8320 | ZNF687       | 1.01 | 6.12E-01 | 8.09E-01 | 1212.34  | not significant |
| 8321 | C7orf25      | 1.01 | 5.57E-01 | 7.75E-01 | 292.93   | not significant |
| 8322 | ZNF337       | 1.01 | 6.14E-01 | 8.10E-01 | 813.98   | not significant |
| 8323 | MAFG-AS1     | 1.01 | 4.58E-01 | 7.06E-01 | 126.07   | not significant |
| 8324 | SH3BGR       | 1.01 | 3.95E-01 | NA       | 84.55    | not significant |
| 8325 | ARHGEF25     | 1.01 | 2.80E-01 | NA       | 47.16    | not significant |
| 8326 | MIR181A1HG   | 1.01 | 1.45E-01 | NA       | 25.10    | not significant |
| 8327 | RPS15        | 1.01 | 5.99E-01 | 8.02E-01 | 10233.64 | not significant |
| 8328 | SF3B1        | 1.01 | 4.93E-01 | 7.31E-01 | 17392.87 | not significant |
| 8329 | MBTPS1       | 1.01 | 5.83E-01 | 7.91E-01 | 4771.34  | not significant |
| 8330 | YTHDC2       | 1.01 | 6.12E-01 | 8.09E-01 | 2333.74  | not significant |
| 8331 | HPS6         | 1.01 | 6.00E-01 | 8.02E-01 | 720.87   | not significant |
| 8332 | RNF214       | 1.01 | 6.10E-01 | 8.09E-01 | 641.53   | not significant |
| 8333 | ZNF668       | 1.01 | 6.13E-01 | 8.10E-01 | 899.10   | not significant |
| 8334 | FRS3         | 1.01 | 4.94E-01 | 7.32E-01 | 165.94   | not significant |
| 8335 | PLEKHA5      | 1.01 | 5.93E-01 | 7.98E-01 | 487.92   | not significant |
| 8336 | MUC4         | 1.01 | 5.72E-01 | 7.83E-01 | 336.58   | not significant |
| 8337 | C15orf37     | 1.01 | 3.90E-01 | NA       | 86.96    | not significant |
| 8338 | BBC3         | 1.01 | 4.25E-01 | 6.79E-01 | 108.20   | not significant |
| 8339 | ZFP3         | 1.01 | 3.10E-01 | NA       | 58.21    | not significant |
| 8340 | FRMD4B       | 1.01 | 4.05E-01 | NA       | 89.39    | not significant |
| 8341 | SLC15A2      | 1.01 | 2.14E-01 | NA       | 45.04    | not significant |
| 8342 | PPP1R12C     | 1.01 | 5.88E-01 | 7.95E-01 | 2960.77  | not significant |
| 8343 | DDX60L       | 1.01 | 5.99E-01 | 8.02E-01 | 1672.65  | not significant |
| 8344 | SAP30BP      | 1.01 | 6.02E-01 | 8.03E-01 | 2566.81  | not significant |
| 8345 | PANK2        | 1.01 | 6.09E-01 | 8.08E-01 | 1535.28  | not significant |
| 8346 | ERF          | 1.01 | 6.07E-01 | 8.06E-01 | 1592.69  | not significant |
| 8347 | OSBPL9       | 1.01 | 6.09E-01 | 8.07E-01 | 1663.05  | not significant |

|      |              |      |          |          |          |                 |
|------|--------------|------|----------|----------|----------|-----------------|
| 8348 | CPNE7        | 1.01 | 6.03E-01 | 8.03E-01 | 455.74   | not significant |
| 8349 | LOC101927204 | 1.01 | 5.46E-01 | 7.67E-01 | 289.21   | not significant |
| 8350 | PTRH1        | 1.01 | 5.62E-01 | 7.78E-01 | 324.96   | not significant |
| 8351 | DUSP16       | 1.01 | 4.03E-01 | NA       | 94.41    | not significant |
| 8352 | SLC25A39     | 1.01 | 5.84E-01 | 7.92E-01 | 4032.03  | not significant |
| 8353 | PMPCA        | 1.01 | 6.75E-01 | 8.48E-01 | 1721.33  | not significant |
| 8354 | AMBRA1       | 1.01 | 6.02E-01 | 8.03E-01 | 1877.77  | not significant |
| 8355 | FANCC        | 1.01 | 5.98E-01 | 8.02E-01 | 915.18   | not significant |
| 8356 | ZFY          | 1.01 | 5.71E-01 | 7.83E-01 | 1195.50  | not significant |
| 8357 | TP53I3       | 1.01 | 3.94E-01 | NA       | 92.21    | not significant |
| 8358 | TMEM161B-AS1 | 1.01 | 3.45E-01 | NA       | 65.89    | not significant |
| 8359 | ZNF707       | 1.01 | 2.91E-01 | NA       | 53.56    | not significant |
| 8360 | TMPRSS5      | 1.01 | 8.93E-02 | NA       | 19.00    | not significant |
| 8361 | ACADM        | 1.01 | 5.79E-01 | 7.88E-01 | 3923.36  | not significant |
| 8362 | FAM204A      | 1.01 | 6.08E-01 | 8.07E-01 | 1306.83  | not significant |
| 8363 | CARD11       | 1.01 | 5.92E-01 | 7.98E-01 | 3022.36  | not significant |
| 8364 | ACN9         | 1.01 | 6.11E-01 | 8.09E-01 | 971.77   | not significant |
| 8365 | ARHGEF18     | 1.01 | 5.94E-01 | 7.99E-01 | 2849.04  | not significant |
| 8366 | ITGAL        | 1.01 | 5.97E-01 | 8.02E-01 | 2424.45  | not significant |
| 8367 | SOC5         | 1.01 | 6.00E-01 | 8.02E-01 | 638.02   | not significant |
| 8368 | GATS         | 1.01 | 5.85E-01 | 7.93E-01 | 751.90   | not significant |
| 8369 | MAP3K1       | 1.01 | 5.67E-01 | 7.81E-01 | 340.22   | not significant |
| 8370 | ATAT1        | 1.01 | 5.52E-01 | 7.71E-01 | 262.44   | not significant |
| 8371 | PRF1         | 1.01 | 4.60E-01 | 7.07E-01 | 127.15   | not significant |
| 8372 | GSTA4        | 1.01 | 3.87E-01 | NA       | 85.60    | not significant |
| 8373 | CADM4        | 1.01 | 2.20E-01 | NA       | 39.97    | not significant |
| 8374 | LRRC75A      | 1.01 | 2.35E-01 | NA       | 42.64    | not significant |
| 8375 | TMED9        | 1.01 | 5.62E-01 | 7.78E-01 | 3471.40  | not significant |
| 8376 | ENO2         | 1.01 | 5.98E-01 | 8.02E-01 | 644.91   | not significant |
| 8377 | ARHGAP25     | 1.01 | 5.95E-01 | 8.00E-01 | 1213.61  | not significant |
| 8378 | CYB561A3     | 1.01 | 5.76E-01 | 7.86E-01 | 1877.42  | not significant |
| 8379 | ITGB1BP2     | 1.01 | 3.57E-01 | NA       | 86.01    | not significant |
| 8380 | RICTOR       | 1.01 | 5.35E-01 | 7.60E-01 | 1631.80  | not significant |
| 8381 | CECR6        | 1.01 | 2.41E-01 | NA       | 48.60    | not significant |
| 8382 | ACKR3        | 1.01 | 4.69E-01 | 7.13E-01 | 152.03   | not significant |
| 8383 | NFYC-AS1     | 1.01 | 4.15E-01 | 6.72E-01 | 110.82   | not significant |
| 8384 | CBX3P2       | 1.01 | 8.45E-02 | NA       | 19.11    | not significant |
| 8385 | DIRC2        | 1.01 | 4.39E-01 | 6.91E-01 | 124.53   | not significant |
| 8386 | ZNF511       | 1.01 | 6.03E-01 | 8.03E-01 | 849.55   | not significant |
| 8387 | PRRG4        | 1.01 | 5.55E-01 | 7.74E-01 | 318.92   | not significant |
| 8388 | ANO8         | 1.01 | 5.02E-01 | 7.38E-01 | 218.90   | not significant |
| 8389 | BAD          | 1.01 | 5.94E-01 | 7.99E-01 | 1183.55  | not significant |
| 8390 | TRIM24       | 1.01 | 5.59E-01 | 7.76E-01 | 4115.49  | not significant |
| 8391 | SNRNP27      | 1.01 | 5.88E-01 | 7.95E-01 | 1786.74  | not significant |
| 8392 | ZSCAN18      | 1.01 | 6.04E-01 | 8.04E-01 | 1121.56  | not significant |
| 8393 | RRAGD        | 1.01 | 6.05E-01 | 8.05E-01 | 1179.88  | not significant |
| 8394 | TOR1B        | 1.01 | 5.92E-01 | 7.98E-01 | 1193.60  | not significant |
| 8395 | EIF2AK3      | 1.01 | 6.00E-01 | 8.02E-01 | 1588.64  | not significant |
| 8396 | IGHMBP2      | 1.01 | 6.03E-01 | 8.03E-01 | 872.70   | not significant |
| 8397 | ARID3A       | 1.01 | 5.92E-01 | 7.98E-01 | 658.29   | not significant |
| 8398 | LTB4R        | 1.01 | 5.70E-01 | 7.83E-01 | 406.22   | not significant |
| 8399 | SOGA3        | 1.01 | 5.66E-01 | 7.81E-01 | 701.45   | not significant |
| 8400 | MIRLET7BHG   | 1.01 | 8.58E-02 | NA       | 20.10    | not significant |
| 8401 | ZNF442       | 1.01 | 2.99E-01 | NA       | 61.50    | not significant |
| 8402 | TSG101       | 1.01 | 5.98E-01 | 8.02E-01 | 1379.12  | not significant |
| 8403 | WHSC1        | 1.01 | 5.37E-01 | 7.61E-01 | 12939.24 | not significant |
| 8404 | EXO1         | 1.01 | 5.62E-01 | 7.78E-01 | 3329.17  | not significant |
| 8405 | ZNF574       | 1.01 | 5.74E-01 | 7.84E-01 | 919.58   | not significant |
| 8406 | TBL1X        | 1.01 | 5.89E-01 | 7.96E-01 | 2076.48  | not significant |
| 8407 | C16orf87     | 1.01 | 5.84E-01 | 7.92E-01 | 482.15   | not significant |
| 8408 | MT1H         | 1.01 | 5.77E-01 | 7.87E-01 | 7060.60  | not significant |
| 8409 | LOC100996579 | 1.01 | 5.62E-01 | 7.78E-01 | 371.74   | not significant |
| 8410 | TTC30B       | 1.01 | 4.28E-01 | 6.82E-01 | 113.30   | not significant |
| 8411 | C14orf39     | 1.01 | 2.45E-01 | NA       | 46.17    | not significant |
| 8412 | ZNF572       | 1.01 | 1.54E-01 | NA       | 29.65    | not significant |
| 8413 | ZNF706       | 1.01 | 6.87E-01 | 8.53E-01 | 1928.07  | not significant |
| 8414 | DAZAP1       | 1.01 | 5.48E-01 | 7.68E-01 | 8871.52  | not significant |
| 8415 | HIRIP3       | 1.01 | 5.87E-01 | 7.94E-01 | 2377.91  | not significant |
| 8416 | UBASH3A      | 1.01 | 5.98E-01 | 8.02E-01 | 1006.68  | not significant |
| 8417 | BCL2L13      | 1.01 | 5.87E-01 | 7.95E-01 | 2006.77  | not significant |
| 8418 | ZNF302       | 1.01 | 5.99E-01 | 8.02E-01 | 951.64   | not significant |
| 8419 | AKAP13       | 1.01 | 5.72E-01 | 7.84E-01 | 2862.67  | not significant |
| 8420 | HAUS7        | 1.01 | 5.68E-01 | 7.82E-01 | 363.19   | not significant |
| 8421 | LOC389765    | 1.01 | 3.06E-01 | NA       | 67.87    | not significant |
| 8422 | ATP1B1       | 1.01 | 4.18E-01 | 6.74E-01 | 117.94   | not significant |
| 8423 | DNAJB12      | 1.01 | 6.87E-01 | 8.53E-01 | 1581.33  | not significant |
| 8424 | RPS19        | 1.01 | 7.77E-01 | 9.03E-01 | 15045.35 | not significant |
| 8425 | SBF1         | 1.01 | 5.36E-01 | 7.61E-01 | 7666.78  | not significant |
| 8426 | RNMTL1       | 1.01 | 5.88E-01 | 7.95E-01 | 760.27   | not significant |
| 8427 | GMEB2        | 1.01 | 5.97E-01 | 8.02E-01 | 1075.31  | not significant |
| 8428 | C19orf70     | 1.01 | 5.85E-01 | 7.93E-01 | 998.73   | not significant |
| 8429 | ZNF780A      | 1.01 | 5.70E-01 | 7.83E-01 | 573.77   | not significant |
| 8430 | COLQ         | 1.01 | 1.92E-01 | NA       | 35.44    | not significant |
| 8431 | LTBP3        | 1.01 | 3.06E-01 | NA       | 76.19    | not significant |
| 8432 | ZNF517       | 1.01 | 3.44E-01 | NA       | 79.84    | not significant |
| 8433 | LOC155060    | 1.01 | 4.86E-01 | 7.26E-01 | 216.69   | not significant |
| 8434 | RPS10P7      | 1.01 | 2.68E-01 | NA       | 51.97    | not significant |
| 8435 | FAM20C       | 1.01 | 6.00E-02 | NA       | 17.22    | not significant |

|      |              |      |          |          |          |                 |
|------|--------------|------|----------|----------|----------|-----------------|
| 8436 | TXN2         | 1.01 | 5.77E-01 | 7.87E-01 | 2699.41  | not significant |
| 8437 | CD244        | 1.01 | 5.66E-01 | 7.81E-01 | 2721.84  | not significant |
| 8438 | SEC11A       | 1.01 | 5.81E-01 | 7.90E-01 | 1994.91  | not significant |
| 8439 | TFAP4        | 1.01 | 5.93E-01 | 7.98E-01 | 957.80   | not significant |
| 8440 | VCIPI1       | 1.01 | 6.45E-01 | 8.31E-01 | 1814.37  | not significant |
| 8441 | ATG4C        | 1.01 | 5.72E-01 | 7.83E-01 | 724.77   | not significant |
| 8442 | ACAA1        | 1.01 | 5.79E-01 | 7.88E-01 | 2282.19  | not significant |
| 8443 | CPT1A        | 1.01 | 5.60E-01 | 7.77E-01 | 3320.64  | not significant |
| 8444 | ENTPD6       | 1.01 | 5.74E-01 | 7.85E-01 | 2049.02  | not significant |
| 8445 | ZFPL1        | 1.01 | 5.80E-01 | 7.88E-01 | 570.87   | not significant |
| 8446 | VIPR2        | 1.01 | 5.81E-01 | 7.90E-01 | 2026.91  | not significant |
| 8447 | MTIF3        | 1.01 | 5.70E-01 | 7.83E-01 | 568.99   | not significant |
| 8448 | NUDT3        | 1.01 | 4.84E-01 | 7.24E-01 | 211.29   | not significant |
| 8449 | DDR1         | 1.01 | 3.21E-01 | NA       | 69.03    | not significant |
| 8450 | SLFNL1-AS1   | 1.01 | 2.84E-01 | NA       | 57.37    | not significant |
| 8451 | LOC100240735 | 1.01 | 1.88E-01 | NA       | 38.88    | not significant |
| 8452 | FAM229A      | 1.01 | 1.56E-01 | NA       | 32.89    | not significant |
| 8453 | SEC14L1P1    | 1.01 | 2.10E-01 | NA       | 40.03    | not significant |
| 8454 | BOLA1        | 1.01 | 4.74E-02 | NA       | 16.20    | not significant |
| 8455 | FASN         | 1.01 | 5.29E-01 | 7.56E-01 | 30051.74 | not significant |
| 8456 | NDUFA2       | 1.01 | 5.88E-01 | 7.95E-01 | 1676.43  | not significant |
| 8457 | ZNF444       | 1.01 | 6.03E-01 | 8.03E-01 | 1352.47  | not significant |
| 8458 | CMAS         | 1.01 | 5.81E-01 | 7.90E-01 | 1515.62  | not significant |
| 8459 | PSMD5-AS1    | 1.01 | 5.94E-01 | 7.99E-01 | 1264.93  | not significant |
| 8460 | RNF13        | 1.01 | 5.88E-01 | 7.95E-01 | 1039.92  | not significant |
| 8461 | ZBTB8A       | 1.01 | 5.82E-01 | 7.90E-01 | 739.65   | not significant |
| 8462 | SMG1P7       | 1.01 | 4.14E-01 | 6.71E-01 | 115.07   | not significant |
| 8463 | STX11        | 1.01 | 2.92E-01 | NA       | 64.45    | not significant |
| 8464 | CCDC96       | 1.01 | 1.53E-01 | NA       | 30.44    | not significant |
| 8465 | RPA1         | 1.01 | 4.71E-01 | 7.15E-01 | 11220.23 | not significant |
| 8466 | SMYD2        | 1.01 | 5.80E-01 | 7.89E-01 | 1627.41  | not significant |
| 8467 | IDH1         | 1.01 | 5.74E-01 | 7.84E-01 | 1500.75  | not significant |
| 8468 | WAS          | 1.01 | 5.77E-01 | 7.87E-01 | 1232.48  | not significant |
| 8469 | YARS2        | 1.01 | 5.71E-01 | 7.83E-01 | 873.10   | not significant |
| 8470 | IRF9         | 1.01 | 5.40E-01 | 7.63E-01 | 336.17   | not significant |
| 8471 | AFF2         | 1.01 | 5.32E-01 | 7.58E-01 | 320.78   | not significant |
| 8472 | SLC27A1      | 1.01 | 3.51E-01 | NA       | 83.40    | not significant |
| 8473 | ZMAT1        | 1.01 | 2.36E-01 | NA       | 50.67    | not significant |
| 8474 | UPP1         | 1.01 | 2.26E-01 | NA       | 46.51    | not significant |
| 8475 | TMEM53       | 1.01 | 2.13E-01 | NA       | 40.86    | not significant |
| 8476 | UHRF1BP1L    | 1.01 | 9.07E-01 | 9.64E-01 | 1234.03  | not significant |
| 8477 | PPM1G        | 1.01 | 5.06E-01 | 7.41E-01 | 9182.20  | not significant |
| 8478 | TTI2         | 1.01 | 6.00E-01 | 8.02E-01 | 1298.89  | not significant |
| 8479 | NAA20        | 1.01 | 5.51E-01 | 7.71E-01 | 2502.62  | not significant |
| 8480 | STXBP2       | 1.01 | 5.82E-01 | 7.90E-01 | 1413.93  | not significant |
| 8481 | FAM169A      | 1.01 | 5.79E-01 | 7.88E-01 | 2254.61  | not significant |
| 8482 | OMA1         | 1.01 | 5.67E-01 | 7.81E-01 | 595.23   | not significant |
| 8483 | CA11         | 1.01 | 5.15E-01 | 7.46E-01 | 247.53   | not significant |
| 8484 | SOAT2        | 1.01 | 4.75E-01 | 7.18E-01 | 186.44   | not significant |
| 8485 | TBC1D2       | 1.01 | 7.73E-02 | NA       | 21.89    | not significant |
| 8486 | LOC90834     | 1.01 | 2.55E-01 | NA       | 53.75    | not significant |
| 8487 | WNT8B        | 1.01 | 3.56E-02 | NA       | 15.67    | not significant |
| 8488 | RASIP1       | 1.01 | 1.22E-01 | NA       | 30.96    | not significant |
| 8489 | PSMB5        | 1.01 | 5.91E-01 | 7.97E-01 | 1665.91  | not significant |
| 8490 | TMEM63B      | 1.01 | 5.28E-01 | 7.55E-01 | 306.44   | not significant |
| 8491 | KLHL23       | 1.01 | 1.97E-01 | NA       | 40.44    | not significant |
| 8492 | BMS1P4       | 1.01 | 4.28E-01 | 6.82E-01 | 137.39   | not significant |
| 8493 | RGS1         | 1.01 | 1.17E-01 | NA       | 27.21    | not significant |
| 8494 | CNOT10       | 1.01 | 6.01E-01 | 8.03E-01 | 1803.10  | not significant |
| 8495 | CCDC34       | 1.01 | 5.69E-01 | 7.83E-01 | 1234.22  | not significant |
| 8496 | DOCK9        | 1.01 | 5.78E-01 | 7.88E-01 | 887.44   | not significant |
| 8497 | TBCC         | 1.01 | 5.67E-01 | 7.81E-01 | 504.31   | not significant |
| 8498 | AKT1S1       | 1.01 | 5.50E-01 | 7.70E-01 | 560.78   | not significant |
| 8499 | FBN1         | 1.01 | 5.30E-01 | 7.56E-01 | 274.06   | not significant |
| 8500 | TNFRSF13C    | 1.01 | 1.40E-01 | NA       | 29.95    | not significant |
| 8501 | HAR1B        | 1.01 | 4.01E-02 | NA       | 15.56    | not significant |
| 8502 | COPS3        | 1.01 | 5.33E-01 | 7.58E-01 | 4946.19  | not significant |
| 8503 | TRAPPC11     | 1.01 | 5.74E-01 | 7.84E-01 | 1696.61  | not significant |
| 8504 | ZFYVE27      | 1.01 | 5.92E-01 | 7.98E-01 | 1316.91  | not significant |
| 8505 | GPR125       | 1.01 | 5.75E-01 | 7.86E-01 | 1578.71  | not significant |
| 8506 | PPCDC        | 1.01 | 5.37E-01 | 7.61E-01 | 382.32   | not significant |
| 8507 | KCTD18       | 1.01 | 5.69E-01 | 7.82E-01 | 683.05   | not significant |
| 8508 | MAST3        | 1.01 | 5.67E-01 | 7.81E-01 | 626.62   | not significant |
| 8509 | SLC16A10     | 1.01 | 2.40E-01 | 5.08E-01 | 299.38   | not significant |
| 8510 | DYNC2LI1     | 1.01 | 3.67E-01 | NA       | 97.68    | not significant |
| 8511 | BTD          | 1.01 | 4.05E-01 | 6.63E-01 | 127.16   | not significant |
| 8512 | LINC00921    | 1.01 | 1.21E-01 | NA       | 31.15    | not significant |
| 8513 | CCDC183-AS1  | 1.01 | 1.58E-01 | NA       | 33.69    | not significant |
| 8514 | MAP3K7       | 1.01 | 5.58E-01 | 7.76E-01 | 2891.64  | not significant |
| 8515 | PFDN6        | 1.01 | 5.72E-01 | 7.83E-01 | 842.33   | not significant |
| 8516 | SLC36A4      | 1.01 | 5.74E-01 | 7.85E-01 | 791.34   | not significant |
| 8517 | CCDC77       | 1.01 | 5.59E-01 | 7.77E-01 | 715.26   | not significant |
| 8518 | ZNF775       | 1.01 | 5.56E-01 | 7.75E-01 | 487.34   | not significant |
| 8519 | HACL1        | 1.01 | 5.44E-01 | 7.65E-01 | 407.69   | not significant |
| 8520 | DAG1         | 1.01 | 5.70E-01 | 7.83E-01 | 989.60   | not significant |
| 8521 | PEX13        | 1.01 | 5.56E-01 | 7.74E-01 | 564.91   | not significant |
| 8522 | HESX1        | 1.01 | 6.85E-02 | NA       | 21.20    | not significant |
| 8523 | NAPA-AS1     | 1.01 | 2.17E-01 | NA       | 54.64    | not significant |

|      |              |      |          |          |          |                 |
|------|--------------|------|----------|----------|----------|-----------------|
| 8524 | LOC100652768 | 1.01 | 2.11E-02 | NA       | 13.54    | not significant |
| 8525 | RPN1         | 1.01 | 4.96E-01 | 7.33E-01 | 10056.37 | not significant |
| 8526 | ARFIP1       | 1.01 | 5.40E-01 | 7.63E-01 | 1141.87  | not significant |
| 8527 | AKR7A2       | 1.01 | 5.68E-01 | 7.82E-01 | 1710.43  | not significant |
| 8528 | ALG6         | 1.01 | 5.76E-01 | 7.86E-01 | 1425.38  | not significant |
| 8529 | TAF1B        | 1.01 | 5.71E-01 | 7.83E-01 | 795.91   | not significant |
| 8530 | ANGPTL6      | 1.01 | 3.88E-01 | 6.50E-01 | 122.81   | not significant |
| 8531 | TOMM7        | 1.01 | 5.70E-01 | 7.83E-01 | 1908.63  | not significant |
| 8532 | SREK1        | 1.01 | 5.19E-01 | 7.49E-01 | 4313.39  | not significant |
| 8533 | KDM5A        | 1.01 | 5.25E-01 | 7.54E-01 | 4307.90  | not significant |
| 8534 | LAMTOR2      | 1.01 | 5.70E-01 | 7.83E-01 | 820.69   | not significant |
| 8535 | MCCS2        | 1.01 | 5.41E-01 | 7.63E-01 | 1893.84  | not significant |
| 8536 | PPAP2A       | 1.01 | 5.44E-01 | 7.65E-01 | 411.94   | not significant |
| 8537 | ZER1         | 1.01 | 5.69E-01 | 7.83E-01 | 819.47   | not significant |
| 8538 | CD79B        | 1.01 | 5.17E-01 | 7.47E-01 | 500.33   | not significant |
| 8539 | ZNF226       | 1.01 | 5.54E-01 | 7.73E-01 | 528.53   | not significant |
| 8540 | GSC          | 1.01 | 4.35E-01 | 6.88E-01 | 149.80   | not significant |
| 8541 | ANKHD1       | 1.01 | 4.87E-01 | 7.27E-01 | 222.85   | not significant |
| 8542 | SMOX         | 1.01 | 4.46E-01 | 6.96E-01 | 158.39   | not significant |
| 8543 | BRSK1        | 1.01 | 4.50E-01 | 6.99E-01 | 162.66   | not significant |
| 8544 | ABCC8        | 1.01 | 3.61E-01 | 6.26E-01 | 100.98   | not significant |
| 8545 | AHCYL1       | 1.01 | 5.14E-01 | 7.46E-01 | 3900.56  | not significant |
| 8546 | CYP4F2       | 1.01 | 7.35E-01 | NA       | 80.24    | not significant |
| 8547 | SLC30A9      | 1.01 | 5.36E-01 | 7.61E-01 | 1899.96  | not significant |
| 8548 | TM2D2        | 1.01 | 5.69E-01 | 7.83E-01 | 1067.07  | not significant |
| 8549 | RAB3GAP1     | 1.01 | 5.34E-01 | 7.60E-01 | 1191.66  | not significant |
| 8550 | RNFT1        | 1.01 | 5.29E-01 | 7.56E-01 | 368.27   | not significant |
| 8551 | GVINP1       | 1.01 | 5.64E-01 | 7.80E-01 | 754.69   | not significant |
| 8552 | HES1         | 1.01 | 4.35E-01 | 6.88E-01 | 168.08   | not significant |
| 8553 | ZNF599       | 1.01 | 4.12E-01 | 6.70E-01 | 134.72   | not significant |
| 8554 | FAM13A       | 1.01 | 2.32E-01 | NA       | 51.82    | not significant |
| 8555 | IQCC         | 1.01 | 2.31E-01 | NA       | 55.88    | not significant |
| 8556 | RNASEH2B     | 1.01 | 5.05E-01 | 7.40E-01 | 4487.83  | not significant |
| 8557 | RPL37        | 1.01 | 5.57E-01 | 7.75E-01 | 12810.29 | not significant |
| 8558 | RBM28        | 1.01 | 5.59E-01 | 7.77E-01 | 1668.30  | not significant |
| 8559 | PALLD        | 1.01 | 5.63E-01 | 7.79E-01 | 1258.67  | not significant |
| 8560 | SCAPER       | 1.01 | 5.52E-01 | 7.71E-01 | 773.91   | not significant |
| 8561 | SHANK3       | 1.01 | 5.17E-01 | 7.47E-01 | 311.14   | not significant |
| 8562 | BAIAP2L2     | 1.01 | 9.31E-02 | NA       | 25.65    | not significant |
| 8563 | TSPAN7       | 1.01 | 5.09E-01 | 7.43E-01 | 5316.51  | not significant |
| 8564 | GTF3C3       | 1.01 | 5.38E-01 | 7.61E-01 | 2617.18  | not significant |
| 8565 | GBF1         | 1.01 | 5.53E-01 | 7.71E-01 | 3782.99  | not significant |
| 8566 | ZMYM2        | 1.01 | 5.05E-01 | 7.39E-01 | 3687.34  | not significant |
| 8567 | EXOC3        | 1.01 | 5.58E-01 | 7.76E-01 | 1696.48  | not significant |
| 8568 | PCTP         | 1.01 | 5.43E-01 | 7.65E-01 | 475.51   | not significant |
| 8569 | IRX5         | 1.01 | 5.32E-01 | 7.58E-01 | 459.30   | not significant |
| 8570 | SURF1        | 1.01 | 5.39E-01 | 7.62E-01 | 429.50   | not significant |
| 8571 | ORAOV1       | 1.01 | 5.39E-01 | 7.62E-01 | 696.62   | not significant |
| 8572 | ZNF582       | 1.01 | 4.73E-01 | 7.16E-01 | 221.24   | not significant |
| 8573 | C8orf37      | 1.01 | 4.65E-01 | 7.11E-01 | 203.51   | not significant |
| 8574 | FCHSD1       | 1.01 | 4.16E-01 | 6.72E-01 | 137.77   | not significant |
| 8575 | TXLNB        | 1.01 | 3.07E-01 | NA       | 83.63    | not significant |
| 8576 | NFKBIZ       | 1.01 | 1.53E-01 | NA       | 41.89    | not significant |
| 8577 | HIST1H3D     | 1.01 | 8.04E-02 | NA       | 24.44    | not significant |
| 8578 | MED25        | 1.01 | 5.37E-01 | 7.61E-01 | 1356.45  | not significant |
| 8579 | DDX59        | 1.01 | 5.58E-01 | 7.76E-01 | 832.08   | not significant |
| 8580 | RAP2B        | 1.01 | 5.49E-01 | 7.68E-01 | 1300.73  | not significant |
| 8581 | GOLGA2P5     | 1.01 | 5.54E-01 | 7.72E-01 | 701.44   | not significant |
| 8582 | SMARCD3      | 1.01 | 5.37E-02 | NA       | 19.21    | not significant |
| 8583 | GLOD4        | 1.01 | 5.46E-01 | 7.66E-01 | 2417.44  | not significant |
| 8584 | TMSB4X       | 1.01 | 5.24E-01 | 7.52E-01 | 34255.60 | not significant |
| 8585 | C11orf49     | 1.01 | 5.60E-01 | 7.77E-01 | 894.84   | not significant |
| 8586 | SMAD6        | 1.01 | 5.60E-01 | 7.77E-01 | 1084.77  | not significant |
| 8587 | DAGLB        | 1.01 | 5.31E-01 | 7.58E-01 | 722.39   | not significant |
| 8588 | DTNB         | 1.01 | 5.31E-01 | 7.57E-01 | 395.14   | not significant |
| 8589 | S1PR3        | 1.01 | 4.19E-01 | 6.75E-01 | 695.79   | not significant |
| 8590 | RENBP        | 1.01 | 2.72E-01 | NA       | 69.92    | not significant |
| 8591 | ARPC3        | 1.01 | 5.25E-01 | 7.54E-01 | 9927.74  | not significant |
| 8592 | TRIM41       | 1.01 | 5.37E-01 | 7.61E-01 | 2140.92  | not significant |
| 8593 | ATP6V0A4     | 1.01 | 5.59E-01 | 7.76E-01 | 892.63   | not significant |
| 8594 | MED12L       | 1.01 | 5.50E-01 | 7.70E-01 | 963.54   | not significant |
| 8595 | DAPP1        | 1.01 | 4.19E-01 | 6.75E-01 | 159.55   | not significant |
| 8596 | PCED1B       | 1.01 | 3.49E-01 | 6.16E-01 | 107.02   | not significant |
| 8597 | ADAMTS6      | 1.01 | 3.32E-01 | NA       | 88.63    | not significant |
| 8598 | IL2RG        | 1.01 | 4.55E-01 | 7.04E-01 | 13428.99 | not significant |
| 8599 | RAVER1       | 1.01 | 4.92E-01 | 7.31E-01 | 9343.08  | not significant |
| 8600 | NOB1         | 1.01 | 5.36E-01 | 7.61E-01 | 3282.82  | not significant |
| 8601 | TRAPPC10     | 1.01 | 5.37E-01 | 7.61E-01 | 2244.26  | not significant |
| 8602 | PLEKHM2      | 1.01 | 5.40E-01 | 7.63E-01 | 2257.46  | not significant |
| 8603 | DGCR2        | 1.01 | 5.36E-01 | 7.61E-01 | 2351.76  | not significant |
| 8604 | DOPEY2       | 1.01 | 5.40E-01 | 7.63E-01 | 1410.36  | not significant |
| 8605 | LINC00528    | 1.01 | 4.86E-01 | 7.26E-01 | 249.01   | not significant |
| 8606 | BCL6         | 1.01 | 3.60E-01 | 6.25E-01 | 116.85   | not significant |
| 8607 | EIF3J-AS1    | 1.01 | 2.42E-01 | NA       | 57.47    | not significant |
| 8608 | OVC42        | 1.01 | 2.68E-01 | NA       | 69.36    | not significant |
| 8609 | MAFF         | 1.01 | 1.36E-01 | NA       | 37.65    | not significant |
| 8610 | CPVL         | 1.01 | 5.37E-01 | 7.61E-01 | 2313.01  | not significant |
| 8611 | JAK1         | 1.01 | 5.14E-01 | 7.46E-01 | 4758.15  | not significant |

|      |              |      |          |          |          |                 |
|------|--------------|------|----------|----------|----------|-----------------|
| 8612 | PIKFYVE      | 1.01 | 5.42E-01 | 7.64E-01 | 5249.21  | not significant |
| 8613 | CMTR2        | 1.01 | 5.47E-01 | 7.67E-01 | 1359.18  | not significant |
| 8614 | LIN37        | 1.01 | 4.45E-01 | 6.96E-01 | 187.49   | not significant |
| 8615 | AGAP3        | 1.01 | 5.28E-01 | 7.55E-01 | 440.09   | not significant |
| 8616 | SGK1         | 1.01 | 2.83E-01 | NA       | 74.98    | not significant |
| 8617 | GLA          | 1.01 | 4.64E-01 | 7.11E-01 | 238.71   | not significant |
| 8618 | ISCU         | 1.01 | 5.35E-01 | 7.60E-01 | 2522.27  | not significant |
| 8619 | KAT5         | 1.01 | 5.44E-01 | 7.65E-01 | 1599.13  | not significant |
| 8620 | FAM217B      | 1.01 | 5.09E-01 | 7.43E-01 | 3643.38  | not significant |
| 8621 | XPC          | 1.01 | 5.51E-01 | 7.71E-01 | 972.37   | not significant |
| 8622 | PHF7         | 1.01 | 5.27E-01 | 7.55E-01 | 423.22   | not significant |
| 8623 | 43526_22646  | 1.01 | 3.46E-01 | 6.13E-01 | 109.33   | not significant |
| 8624 | LRRC56       | 1.01 | 1.04E-01 | NA       | 31.20    | not significant |
| 8625 | TIMM13       | 1.01 | 5.43E-01 | 7.64E-01 | 3211.13  | not significant |
| 8626 | MPZL1        | 1.01 | 5.17E-01 | 7.47E-01 | 3482.63  | not significant |
| 8627 | PHF3         | 1.01 | 5.38E-01 | 7.61E-01 | 3919.46  | not significant |
| 8628 | USP12        | 1.01 | 5.36E-01 | 7.61E-01 | 1984.63  | not significant |
| 8629 | CPD          | 1.01 | 5.08E-01 | 7.42E-01 | 2933.72  | not significant |
| 8630 | MED11        | 1.01 | 4.82E-01 | 7.23E-01 | 323.29   | not significant |
| 8631 | PRIMPOL      | 1.01 | 5.17E-01 | 7.47E-01 | 485.72   | not significant |
| 8632 | GYG1         | 1.01 | 4.66E-01 | 7.11E-01 | 229.00   | not significant |
| 8633 | LOC100128398 | 1.01 | 3.59E-01 | 6.24E-01 | 120.96   | not significant |
| 8634 | FIBP         | 1.01 | 5.22E-01 | 7.51E-01 | 2963.13  | not significant |
| 8635 | AUP1         | 1.01 | 5.02E-01 | 7.38E-01 | 4915.98  | not significant |
| 8636 | CMPK2        | 1.01 | 5.14E-01 | 7.46E-01 | 3504.47  | not significant |
| 8637 | SLC39A8      | 1.01 | 4.81E-01 | 7.22E-01 | 5442.52  | not significant |
| 8638 | POLE2        | 1.01 | 5.48E-01 | 7.68E-01 | 971.35   | not significant |
| 8639 | PPP3CA       | 1.01 | 5.39E-01 | 7.62E-01 | 1432.26  | not significant |
| 8640 | PHAX         | 1.01 | 5.41E-01 | 7.63E-01 | 1496.39  | not significant |
| 8641 | SLC25A24     | 1.01 | 5.25E-01 | 7.54E-01 | 1728.71  | not significant |
| 8642 | SUPT3H       | 1.01 | 5.39E-01 | 7.62E-01 | 697.31   | not significant |
| 8643 | ANOS5        | 1.01 | 4.77E-01 | 7.19E-01 | 269.89   | not significant |
| 8644 | P DPR        | 1.01 | 4.72E-01 | 7.15E-01 | 3935.12  | not significant |
| 8645 | ASTN2        | 1.01 | 3.43E-01 | 6.10E-01 | 105.58   | not significant |
| 8646 | MYRF         | 1.01 | 1.84E-01 | NA       | 47.05    | not significant |
| 8647 | MTL5         | 1.01 | 1.39E-01 | NA       | 37.51    | not significant |
| 8648 | GYPC         | 1.01 | 5.41E-01 | 7.63E-01 | 1851.40  | not significant |
| 8649 | GAMT         | 1.01 | 5.42E-01 | 7.64E-01 | 2172.58  | not significant |
| 8650 | BAG1         | 1.01 | 5.38E-01 | 7.61E-01 | 1678.11  | not significant |
| 8651 | DEPDC5       | 1.01 | 5.46E-01 | 7.67E-01 | 938.85   | not significant |
| 8652 | TMEM200A     | 1.01 | 4.48E-01 | 6.98E-01 | 207.57   | not significant |
| 8653 | OXTR         | 1.01 | 3.76E-01 | 6.40E-01 | 129.95   | not significant |
| 8654 | ZNF514       | 1.01 | 3.62E-01 | 6.26E-01 | 129.85   | not significant |
| 8655 | LOC729218    | 1.01 | 3.89E-01 | 6.51E-01 | 685.67   | not significant |
| 8656 | ADORA3       | 1.01 | 1.29E-01 | NA       | 33.41    | not significant |
| 8657 | RPS13        | 1.01 | 5.13E-01 | 7.45E-01 | 11857.53 | not significant |
| 8658 | SEC24D       | 1.01 | 5.28E-01 | 7.55E-01 | 1962.67  | not significant |
| 8659 | CASP4        | 1.01 | 5.42E-01 | 7.64E-01 | 1062.70  | not significant |
| 8660 | AFF1         | 1.01 | 5.34E-01 | 7.59E-01 | 4438.20  | not significant |
| 8661 | TMEM223      | 1.01 | 4.98E-01 | 7.35E-01 | 491.01   | not significant |
| 8662 | ZNF691       | 1.01 | 5.00E-01 | 7.36E-01 | 330.56   | not significant |
| 8663 | GORASP1      | 1.01 | 4.88E-01 | 7.28E-01 | 310.45   | not significant |
| 8664 | ST6GALNAC4   | 1.01 | 3.23E-01 | NA       | 97.31    | not significant |
| 8665 | KIAA1279     | 1.01 | 5.57E-01 | 7.75E-01 | 748.39   | not significant |
| 8666 | KIF7         | 1.01 | 5.32E-01 | 7.58E-01 | 658.70   | not significant |
| 8667 | RBM4B        | 1.01 | 5.11E-01 | 7.44E-01 | 388.11   | not significant |
| 8668 | SMIM20       | 1.01 | 5.17E-01 | 7.47E-01 | 529.03   | not significant |
| 8669 | MEF2B NB     | 1.01 | 4.20E-01 | 6.75E-01 | 192.48   | not significant |
| 8670 | UBALD1       | 1.01 | 4.73E-01 | 7.16E-01 | 226.62   | not significant |
| 8671 | PLOD3        | 1.01 | 4.65E-01 | 7.11E-01 | 265.74   | not significant |
| 8672 | SIX3-AS1     | 1.01 | 2.07E-01 | NA       | 52.54    | not significant |
| 8673 | ATXN7L3B     | 1.01 | 4.52E-01 | 7.01E-01 | 8252.09  | not significant |
| 8674 | MAD2L1       | 1.01 | 4.96E-01 | 7.33E-01 | 3924.71  | not significant |
| 8675 | PHC2         | 1.01 | 5.16E-01 | 7.47E-01 | 3292.08  | not significant |
| 8676 | IL32         | 1.01 | 5.31E-01 | 7.57E-01 | 3668.45  | not significant |
| 8677 | PRRC1        | 1.01 | 4.96E-01 | 7.33E-01 | 3077.66  | not significant |
| 8678 | DPYD         | 1.01 | 5.09E-01 | 7.43E-01 | 2619.54  | not significant |
| 8679 | TASP1        | 1.01 | 5.36E-01 | 7.61E-01 | 774.07   | not significant |
| 8680 | AIF1         | 1.01 | 4.46E-01 | 6.96E-01 | 1765.48  | not significant |
| 8681 | LENG1        | 1.01 | 3.12E-01 | NA       | 89.87    | not significant |
| 8682 | TIGD2        | 1.01 | 3.70E-01 | 6.34E-01 | 130.07   | not significant |
| 8683 | L3MBTL1      | 1.01 | 3.06E-01 | 5.78E-01 | 103.14   | not significant |
| 8684 | RABL2B       | 1.01 | 1.57E-01 | NA       | 42.39    | not significant |
| 8685 | BST1         | 1.01 | 2.60E-01 | NA       | 68.46    | not significant |
| 8686 | C6orf132     | 1.01 | 1.90E-01 | NA       | 50.29    | not significant |
| 8687 | ALDH2        | 1.01 | 1.01E-01 | NA       | 30.35    | not significant |
| 8688 | IPO5         | 1.01 | 4.36E-01 | 6.89E-01 | 15516.18 | not significant |
| 8689 | ECH1         | 1.01 | 5.31E-01 | 7.58E-01 | 2510.10  | not significant |
| 8690 | TET2         | 1.01 | 5.62E-01 | 7.78E-01 | 1157.82  | not significant |
| 8691 | ZNF133       | 1.01 | 4.76E-01 | 7.18E-01 | 291.00   | not significant |
| 8692 | BMP1         | 1.01 | 5.05E-01 | 7.40E-01 | 480.78   | not significant |
| 8693 | MOB3C        | 1.01 | 3.48E-01 | 6.15E-01 | 109.40   | not significant |
| 8694 | PILRA        | 1.01 | 2.86E-01 | NA       | 84.77    | not significant |
| 8695 | CDKL3        | 1.01 | 2.05E-01 | NA       | 53.39    | not significant |
| 8696 | SEMA6C       | 1.01 | 2.42E-01 | NA       | 64.86    | not significant |
| 8697 | ZNF763       | 1.01 | 1.62E-01 | NA       | 44.67    | not significant |
| 8698 | AES          | 1.01 | 4.89E-01 | 7.28E-01 | 12178.37 | not significant |
| 8699 | GID4         | 1.01 | 5.30E-01 | 7.57E-01 | 913.61   | not significant |

|      |              |      |          |          |          |                 |
|------|--------------|------|----------|----------|----------|-----------------|
| 8700 | RPL18A       | 1.01 | 5.14E-01 | 7.46E-01 | 12831.77 | not significant |
| 8701 | STRIP1       | 1.01 | 5.24E-01 | 7.52E-01 | 1733.28  | not significant |
| 8702 | TRAPPC12     | 1.01 | 5.33E-01 | 7.58E-01 | 1242.67  | not significant |
| 8703 | IBA57        | 1.01 | 5.13E-01 | 7.45E-01 | 529.22   | not significant |
| 8704 | TTBK2        | 1.01 | 4.94E-01 | 7.33E-01 | 406.03   | not significant |
| 8705 | FBXO3        | 1.01 | 4.80E-01 | 7.21E-01 | 335.87   | not significant |
| 8706 | ALDH1A2      | 1.01 | 4.22E-01 | 6.76E-01 | 188.60   | not significant |
| 8707 | LOC101928736 | 1.01 | 2.92E-01 | NA       | 78.42    | not significant |
| 8708 | CD164        | 1.01 | 4.62E-01 | 7.09E-01 | 15716.75 | not significant |
| 8709 | SLC7A1       | 1.01 | 5.06E-01 | 7.40E-01 | 12412.15 | not significant |
| 8710 | NXF1         | 1.01 | 5.00E-01 | 7.36E-01 | 3936.07  | not significant |
| 8711 | SH3GL1       | 1.01 | 5.11E-01 | 7.44E-01 | 1482.28  | not significant |
| 8712 | SLC25A28     | 1.01 | 5.24E-01 | 7.52E-01 | 714.78   | not significant |
| 8713 | SNRNP35      | 1.01 | 5.01E-01 | 7.37E-01 | 406.58   | not significant |
| 8714 | TICAM1       | 1.01 | 5.10E-01 | 7.44E-01 | 449.06   | not significant |
| 8715 | NLGN2        | 1.01 | 5.05E-01 | 7.40E-01 | 457.13   | not significant |
| 8716 | LY75         | 1.01 | 4.95E-01 | 7.33E-01 | 416.19   | not significant |
| 8717 | CTXN1        | 1.01 | 3.44E-01 | 6.10E-01 | 113.11   | not significant |
| 8718 | MTCL1        | 1.01 | 3.16E-01 | NA       | 100.13   | not significant |
| 8719 | GPA33        | 1.01 | 3.60E-01 | 6.25E-01 | 129.70   | not significant |
| 8720 | PBX4         | 1.01 | 3.37E-01 | 6.05E-01 | 128.63   | not significant |
| 8721 | OCEL1        | 1.01 | 2.83E-01 | NA       | 79.58    | not significant |
| 8722 | PCDHGA11     | 1.01 | 1.71E-01 | NA       | 47.13    | not significant |
| 8723 | NUP37        | 1.01 | 5.43E-01 | 7.64E-01 | 1927.39  | not significant |
| 8724 | CDC45        | 1.01 | 4.52E-01 | 7.01E-01 | 6891.67  | not significant |
| 8725 | GSTO1        | 1.01 | 5.29E-01 | 7.56E-01 | 2600.26  | not significant |
| 8726 | RABL6        | 1.01 | 4.95E-01 | 7.33E-01 | 3146.38  | not significant |
| 8727 | GSDMB        | 1.01 | 5.09E-01 | 7.43E-01 | 565.88   | not significant |
| 8728 | RABGAP1L     | 1.01 | 5.24E-01 | 7.52E-01 | 800.60   | not significant |
| 8729 | ATP5S        | 1.01 | 4.51E-01 | 7.00E-01 | 241.99   | not significant |
| 8730 | CDH23        | 1.01 | 2.31E-01 | NA       | 65.92    | not significant |
| 8731 | FLJ20021     | 1.01 | 9.01E-02 | NA       | 31.00    | not significant |
| 8732 | CROCCP3      | 1.01 | 2.17E-01 | NA       | 57.24    | not significant |
| 8733 | LOC100132356 | 1.01 | 6.62E-02 | NA       | 25.60    | not significant |
| 8734 | LOC93622     | 1.01 | 5.00E-01 | 7.36E-01 | 948.20   | not significant |
| 8735 | TMBIM1       | 1.01 | 5.13E-01 | 7.45E-01 | 468.36   | not significant |
| 8736 | ALG9         | 1.01 | 5.08E-01 | 7.42E-01 | 582.64   | not significant |
| 8737 | ERV3-1       | 1.01 | 4.54E-01 | 7.03E-01 | 313.44   | not significant |
| 8738 | PJA1         | 1.01 | 4.69E-01 | 7.14E-01 | 297.29   | not significant |
| 8739 | PQLC2        | 1.01 | 3.25E-01 | 5.94E-01 | 111.29   | not significant |
| 8740 | CACNA1D      | 1.01 | 3.86E-01 | 6.48E-01 | 145.81   | not significant |
| 8741 | DDX50        | 1.01 | 4.77E-01 | 7.19E-01 | 2824.84  | not significant |
| 8742 | FAM111B      | 1.01 | 5.00E-01 | 7.36E-01 | 1221.43  | not significant |
| 8743 | DMXL2        | 1.01 | 5.14E-01 | 7.46E-01 | 1494.48  | not significant |
| 8744 | CAMTA2       | 1.01 | 5.17E-01 | 7.47E-01 | 1280.50  | not significant |
| 8745 | TRIM8        | 1.01 | 5.13E-01 | 7.45E-01 | 915.09   | not significant |
| 8746 | NICN1        | 1.01 | 5.11E-01 | 7.44E-01 | 518.64   | not significant |
| 8747 | NCKAP1       | 1.01 | 5.12E-01 | 7.45E-01 | 465.50   | not significant |
| 8748 | IFI27L1      | 1.01 | 4.61E-01 | 7.08E-01 | 274.52   | not significant |
| 8749 | AARD         | 1.01 | 4.37E-01 | 6.90E-01 | 216.59   | not significant |
| 8750 | LINC00263    | 1.01 | 3.43E-01 | 6.10E-01 | 120.66   | not significant |
| 8751 | ZNF582-AS1   | 1.01 | 2.74E-01 | NA       | 84.52    | not significant |
| 8752 | TRIM16L      | 1.01 | 1.74E-01 | NA       | 48.15    | not significant |
| 8753 | CSTF3-AS1    | 1.01 | 1.55E-01 | NA       | 51.78    | not significant |
| 8754 | ZNF135       | 1.01 | 1.10E-01 | NA       | 37.46    | not significant |
| 8755 | DCP2         | 1.01 | 4.52E-01 | 7.01E-01 | 5984.75  | not significant |
| 8756 | AFG3L1P      | 1.01 | 5.21E-01 | 7.51E-01 | 905.06   | not significant |
| 8757 | NFU1         | 1.01 | 5.09E-01 | 7.43E-01 | 680.87   | not significant |
| 8758 | ARNT         | 1.01 | 4.99E-01 | 7.36E-01 | 1319.81  | not significant |
| 8759 | RPS16        | 1.01 | 4.93E-01 | 7.32E-01 | 17059.28 | not significant |
| 8760 | ENOSF1       | 1.01 | 4.63E-01 | 7.09E-01 | 1174.18  | not significant |
| 8761 | ZNF382       | 1.01 | 4.89E-01 | 7.28E-01 | 395.90   | not significant |
| 8762 | FAM171A2     | 1.01 | 3.56E-01 | 6.22E-01 | 138.96   | not significant |
| 8763 | KIAA1875     | 1.01 | 1.37E-01 | NA       | 40.87    | not significant |
| 8764 | IZUMO4       | 1.01 | 1.24E-01 | NA       | 39.60    | not significant |
| 8765 | TMED10       | 1.01 | 4.17E-01 | 6.73E-01 | 14219.09 | not significant |
| 8766 | SMYD4        | 1.01 | 5.29E-01 | 7.56E-01 | 1432.18  | not significant |
| 8767 | TMF1         | 1.01 | 5.13E-01 | 7.45E-01 | 1698.13  | not significant |
| 8768 | GHDC         | 1.01 | 5.18E-01 | 7.48E-01 | 790.15   | not significant |
| 8769 | COG1         | 1.01 | 4.87E-01 | 7.27E-01 | 1391.96  | not significant |
| 8770 | HIMBOX1      | 1.01 | 4.99E-01 | 7.36E-01 | 644.69   | not significant |
| 8771 | RDM1         | 1.01 | 7.55E-02 | NA       | 28.64    | not significant |
| 8772 | PRSS53       | 1.01 | 3.83E-01 | 6.46E-01 | 160.60   | not significant |
| 8773 | IFNGR2       | 1.01 | 4.19E-01 | 6.75E-01 | 239.42   | not significant |
| 8774 | SMIM4        | 1.01 | 3.62E-01 | 6.26E-01 | 144.27   | not significant |
| 8775 | CEACAM1      | 1.01 | 2.41E-01 | NA       | 73.67    | not significant |
| 8776 | ZFHX2        | 1.01 | 3.18E-01 | 5.88E-01 | 121.79   | not significant |
| 8777 | EIF4B        | 1.01 | 4.20E-01 | 6.75E-01 | 14632.09 | not significant |
| 8778 | TANGO2       | 1.01 | 5.19E-01 | 7.49E-01 | 792.36   | not significant |
| 8779 | VPS52        | 1.01 | 5.11E-01 | 7.44E-01 | 602.72   | not significant |
| 8780 | AKTIP        | 1.01 | 4.74E-01 | 7.17E-01 | 325.78   | not significant |
| 8781 | ZNF280C      | 1.01 | 4.86E-01 | 7.26E-01 | 430.77   | not significant |
| 8782 | PLEKHM1P     | 1.01 | 4.68E-01 | 7.13E-01 | 395.29   | not significant |
| 8783 | TMEM163      | 1.01 | 4.42E-01 | 6.93E-01 | 288.68   | not significant |
| 8784 | RETN         | 1.01 | 4.08E-01 | 6.66E-01 | 187.14   | not significant |
| 8785 | SPSB4        | 1.01 | 2.91E-01 | NA       | 92.43    | not significant |
| 8786 | CBR3         | 1.01 | 1.81E-01 | NA       | 63.72    | not significant |
| 8787 | ANXA5        | 1.01 | 4.89E-01 | 7.28E-01 | 3481.83  | not significant |

|      |              |      |          |          |          |                 |
|------|--------------|------|----------|----------|----------|-----------------|
| 8788 | UQCRB        | 1.01 | 5.10E-01 | 7.44E-01 | 3898.17  | not significant |
| 8789 | ECE1         | 1.01 | 4.95E-01 | 7.33E-01 | 2292.27  | not significant |
| 8790 | TP53I11      | 1.01 | 4.97E-01 | 7.34E-01 | 1510.19  | not significant |
| 8791 | SAP30        | 1.01 | 5.03E-01 | 7.39E-01 | 754.88   | not significant |
| 8792 | C10orf35     | 1.01 | 4.38E-01 | 6.90E-01 | 233.54   | not significant |
| 8793 | MACF1        | 1.01 | 4.67E-01 | 7.12E-01 | 9333.22  | not significant |
| 8794 | TERT         | 1.01 | 3.45E-01 | 6.12E-01 | 127.78   | not significant |
| 8795 | LINC00920    | 1.01 | 2.92E-01 | NA       | 97.75    | not significant |
| 8796 | LOC100507373 | 1.01 | 2.80E-01 | NA       | 86.79    | not significant |
| 8797 | CHURC1       | 1.01 | 5.04E-01 | 7.39E-01 | 1260.73  | not significant |
| 8798 | MZT2B        | 1.01 | 5.17E-01 | 7.47E-01 | 2964.84  | not significant |
| 8799 | SNX13        | 1.01 | 5.13E-01 | 7.45E-01 | 1231.14  | not significant |
| 8800 | TMEM55A      | 1.01 | 4.66E-01 | 7.12E-01 | 376.74   | not significant |
| 8801 | VMAC         | 1.01 | 2.69E-01 | NA       | 96.38    | not significant |
| 8802 | RBBP8        | 1.01 | 4.67E-01 | 7.12E-01 | 4357.62  | not significant |
| 8803 | RNF113A      | 1.01 | 5.04E-01 | 7.39E-01 | 704.06   | not significant |
| 8804 | ZCCHC8       | 1.01 | 4.35E-01 | 6.88E-01 | 1835.32  | not significant |
| 8805 | RPL31        | 1.01 | 4.59E-01 | 7.06E-01 | 12655.61 | not significant |
| 8806 | ZBTB49       | 1.01 | 4.57E-01 | 7.05E-01 | 297.95   | not significant |
| 8807 | GABPB1-AS1   | 1.01 | 3.93E-01 | 6.54E-01 | 188.89   | not significant |
| 8808 | RWDD2A       | 1.01 | 2.45E-01 | NA       | 76.75    | not significant |
| 8809 | LINC00969    | 1.01 | 6.66E-02 | NA       | 31.93    | not significant |
| 8810 | BCL2A1       | 1.01 | 1.22E-01 | NA       | 39.40    | not significant |
| 8811 | HCN3         | 1.01 | 1.95E-02 | NA       | 16.68    | not significant |
| 8812 | CDC6         | 1.01 | 4.50E-01 | 6.99E-01 | 4397.52  | not significant |
| 8813 | RPL39L       | 1.01 | 5.79E-01 | 7.88E-01 | 895.27   | not significant |
| 8814 | BCAP29       | 1.01 | 4.86E-01 | 7.26E-01 | 2115.20  | not significant |
| 8815 | RMDN1        | 1.01 | 5.11E-01 | 7.44E-01 | 1327.35  | not significant |
| 8816 | ITFG1        | 1.01 | 5.12E-01 | 7.44E-01 | 1358.76  | not significant |
| 8817 | TRO          | 1.01 | 4.93E-01 | 7.32E-01 | 555.67   | not significant |
| 8818 | BTN2A3P      | 1.01 | 2.55E-01 | NA       | 84.20    | not significant |
| 8819 | CHD5         | 1.01 | 2.79E-01 | NA       | 97.11    | not significant |
| 8820 | LOC100499489 | 1.01 | 2.54E-01 | NA       | 87.33    | not significant |
| 8821 | CARD8        | 1.01 | 5.04E-01 | 7.39E-01 | 1661.85  | not significant |
| 8822 | NOL3         | 1.01 | 2.44E-01 | NA       | 76.91    | not significant |
| 8823 | TTC7A        | 1.01 | 4.66E-01 | 7.11E-01 | 5589.51  | not significant |
| 8824 | FBX07        | 1.01 | 4.68E-01 | 7.12E-01 | 3294.65  | not significant |
| 8825 | TRNT1        | 1.01 | 5.17E-01 | 7.47E-01 | 1349.39  | not significant |
| 8826 | KDM3B        | 1.01 | 4.68E-01 | 7.12E-01 | 3849.03  | not significant |
| 8827 | BRD9         | 1.01 | 4.82E-01 | 7.23E-01 | 2283.11  | not significant |
| 8828 | CASZ1        | 1.01 | 4.82E-01 | 7.23E-01 | 548.60   | not significant |
| 8829 | CBR1         | 1.01 | 4.93E-01 | 7.32E-01 | 589.08   | not significant |
| 8830 | ZNF780B      | 1.01 | 4.90E-01 | 7.29E-01 | 685.88   | not significant |
| 8831 | NDN          | 1.01 | 4.84E-01 | 7.24E-01 | 468.05   | not significant |
| 8832 | WDR13        | 1.01 | 3.89E-01 | 6.50E-01 | 191.29   | not significant |
| 8833 | LOC554206    | 1.01 | 3.85E-02 | NA       | 21.36    | not significant |
| 8834 | LOC101928865 | 1.01 | 1.77E-01 | NA       | 53.67    | not significant |
| 8835 | CXorf65      | 1.01 | 1.97E-01 | NA       | 67.00    | not significant |
| 8836 | OAZ1         | 1.01 | 6.15E-01 | 8.11E-01 | 23145.99 | not significant |
| 8837 | ELOVL1       | 1.01 | 4.81E-01 | 7.22E-01 | 2174.37  | not significant |
| 8838 | PSMG3        | 1.01 | 5.10E-01 | 7.44E-01 | 1740.71  | not significant |
| 8839 | WIBG         | 1.01 | 4.87E-01 | 7.27E-01 | 699.18   | not significant |
| 8840 | TRAF3IP2-AS1 | 1.01 | 4.80E-01 | 7.22E-01 | 446.45   | not significant |
| 8841 | KCNK12       | 1.01 | 3.22E-02 | NA       | 20.43    | not significant |
| 8842 | TMC6         | 1.01 | 4.72E-01 | 7.15E-01 | 2897.46  | not significant |
| 8843 | ABHD10       | 1.01 | 4.57E-01 | 7.05E-01 | 1907.25  | not significant |
| 8844 | CAMK2D       | 1.01 | 5.04E-01 | 7.39E-01 | 927.26   | not significant |
| 8845 | ATP8B3       | 1.01 | 4.96E-01 | 7.33E-01 | 785.79   | not significant |
| 8846 | LIAS         | 1.01 | 5.03E-01 | 7.38E-01 | 610.09   | not significant |
| 8847 | PAX8         | 1.01 | 3.95E-01 | 6.54E-01 | 194.82   | not significant |
| 8848 | GNRH1        | 1.01 | 2.46E-01 | NA       | 84.45    | not significant |
| 8849 | ASB3         | 1.01 | 1.73E-01 | NA       | 58.41    | not significant |
| 8850 | TXNDC5       | 1.01 | 1.43E-01 | NA       | 49.17    | not significant |
| 8851 | IQGAP1       | 1.01 | 4.79E-01 | 7.21E-01 | 12727.64 | not significant |
| 8852 | SELK         | 1.01 | 5.00E-01 | 7.36E-01 | 1093.88  | not significant |
| 8853 | UCK1         | 1.01 | 4.66E-01 | 7.11E-01 | 1245.64  | not significant |
| 8854 | GRHPR        | 1.01 | 5.00E-01 | 7.36E-01 | 1295.73  | not significant |
| 8855 | NDST3        | 1.01 | 4.97E-01 | 7.35E-01 | 1467.61  | not significant |
| 8856 | TMEM134      | 1.01 | 4.80E-01 | 7.22E-01 | 597.72   | not significant |
| 8857 | N4BP3        | 1.01 | 1.15E-01 | NA       | 38.89    | not significant |
| 8858 | LINC00998    | 1.01 | 4.99E-01 | 7.36E-01 | 1071.99  | not significant |
| 8859 | NDUFA3       | 1.01 | 4.92E-01 | 7.31E-01 | 753.02   | not significant |
| 8860 | RPL36        | 1.01 | 4.55E-01 | 7.04E-01 | 13651.03 | not significant |
| 8861 | ASPHD2       | 1.01 | 4.19E-01 | 6.75E-01 | 242.63   | not significant |
| 8862 | HIVEP1       | 1.01 | 3.95E-01 | 6.55E-01 | 219.92   | not significant |
| 8863 | NEURL2       | 1.01 | 6.21E-02 | NA       | 30.93    | not significant |
| 8864 | CD2BP2       | 1.01 | 4.76E-01 | 7.18E-01 | 3309.89  | not significant |
| 8865 | HIP1R        | 1.01 | 4.44E-01 | 6.95E-01 | 3400.63  | not significant |
| 8866 | KCTD17       | 1.01 | 4.58E-01 | 7.05E-01 | 523.93   | not significant |
| 8867 | ESYT1        | 1.01 | 4.21E-01 | 6.76E-01 | 12651.24 | not significant |
| 8868 | GGA3         | 1.01 | 4.49E-01 | 6.99E-01 | 4155.15  | not significant |
| 8869 | NUP160       | 1.01 | 4.35E-01 | 6.88E-01 | 6242.87  | not significant |
| 8870 | SYNRG        | 1.01 | 4.50E-01 | 6.99E-01 | 3377.05  | not significant |
| 8871 | KDM2B        | 1.01 | 4.94E-01 | 7.32E-01 | 1070.17  | not significant |
| 8872 | GPR63        | 1.01 | 4.91E-01 | 7.30E-01 | 824.30   | not significant |
| 8873 | TBC1D8       | 1.01 | 4.66E-01 | 7.12E-01 | 475.42   | not significant |
| 8874 | GZMB         | 1.01 | 4.22E-01 | 6.77E-01 | 245.42   | not significant |
| 8875 | ERCC5        | 1.01 | 2.31E-01 | NA       | 76.57    | not significant |



|      |              |      |          |          |          |                 |
|------|--------------|------|----------|----------|----------|-----------------|
| 8876 | PABPC4       | 1.01 | 3.94E-01 | 6.54E-01 | 8032.95  | not significant |
| 8877 | HTATSF1      | 1.01 | 4.34E-01 | 6.88E-01 | 5191.95  | not significant |
| 8878 | TMSB10       | 1.01 | 6.18E-01 | 8.14E-01 | 16707.29 | not significant |
| 8879 | PRIM2        | 1.01 | 4.68E-01 | 7.12E-01 | 1240.16  | not significant |
| 8880 | B3GAL.TL     | 1.01 | 4.91E-01 | 7.30E-01 | 1164.77  | not significant |
| 8881 | ARL13B       | 1.01 | 4.84E-01 | 7.25E-01 | 640.82   | not significant |
| 8882 | IKZF1        | 1.01 | 4.71E-01 | 7.15E-01 | 11846.15 | not significant |
| 8883 | WDR26        | 1.01 | 4.38E-01 | 6.90E-01 | 4768.97  | not significant |
| 8884 | VPS18        | 1.01 | 4.90E-01 | 7.29E-01 | 928.18   | not significant |
| 8885 | ZNF841       | 1.01 | 4.67E-01 | 7.12E-01 | 437.46   | not significant |
| 8886 | RHBDD2       | 1.01 | 4.26E-01 | 6.80E-01 | 303.06   | not significant |
| 8887 | LITAF        | 1.01 | 3.22E-01 | 5.92E-01 | 581.88   | not significant |
| 8888 | COL6A4P1     | 1.01 | 3.39E-02 | NA       | 22.33    | not significant |
| 8889 | ZAP70        | 1.01 | 3.77E-01 | 6.42E-01 | 9759.23  | not significant |
| 8890 | NEK7         | 1.01 | 4.23E-01 | 6.78E-01 | 5308.33  | not significant |
| 8891 | AP2A1        | 1.01 | 4.47E-01 | 6.97E-01 | 3273.33  | not significant |
| 8892 | LRRC75A-AS1  | 1.01 | 4.42E-01 | 6.93E-01 | 17251.08 | not significant |
| 8893 | MAN1A1       | 1.01 | 4.48E-01 | 6.98E-01 | 5154.01  | not significant |
| 8894 | CLDND1       | 1.01 | 5.33E-01 | 7.59E-01 | 1743.59  | not significant |
| 8895 | KIF24        | 1.01 | 4.78E-01 | 7.20E-01 | 827.33   | not significant |
| 8896 | STX3         | 1.01 | 8.39E-02 | NA       | 33.91    | not significant |
| 8897 | LOC100129518 | 1.01 | 7.62E-02 | NA       | 33.78    | not significant |
| 8898 | HAPLN3       | 1.01 | 7.87E-02 | NA       | 40.16    | not significant |
| 8899 | AARS         | 1.01 | 3.73E-01 | 6.38E-01 | 9302.39  | not significant |
| 8900 | CXXC1        | 1.01 | 4.54E-01 | 7.03E-01 | 2861.39  | not significant |
| 8901 | TAF10        | 1.01 | 4.85E-01 | 7.26E-01 | 2062.61  | not significant |
| 8902 | INSIG2       | 1.01 | 4.76E-01 | 7.18E-01 | 628.62   | not significant |
| 8903 | DLG4         | 1.01 | 4.72E-01 | 7.15E-01 | 740.18   | not significant |
| 8904 | RPL32        | 1.01 | 4.47E-01 | 6.97E-01 | 16534.04 | not significant |
| 8905 | LOC284023    | 1.01 | 4.08E-01 | 6.66E-01 | 242.69   | not significant |
| 8906 | B3GNT1       | 1.01 | 4.26E-01 | 6.80E-01 | 293.33   | not significant |
| 8907 | LINC00999    | 1.01 | 2.25E-01 | NA       | 79.54    | not significant |
| 8908 | SLC25A25     | 1.01 | 4.86E-01 | 7.26E-01 | 1009.62  | not significant |
| 8909 | PIP4K2C      | 1.01 | 4.79E-01 | 7.21E-01 | 1133.00  | not significant |
| 8910 | ZNF777       | 1.01 | 4.82E-01 | 7.22E-01 | 679.47   | not significant |
| 8911 | CERS4        | 1.01 | 2.81E-01 | 5.52E-01 | 103.11   | not significant |
| 8912 | ZFYVE20      | 1.01 | 4.59E-01 | 7.06E-01 | 473.54   | not significant |
| 8913 | HIST1H3B     | 1.01 | 6.66E-02 | NA       | 34.53    | not significant |
| 8914 | OLFM2        | 1.01 | 1.27E-01 | NA       | 51.05    | not significant |
| 8915 | ATP6V0D1     | 1.01 | 4.73E-01 | 7.16E-01 | 1586.45  | not significant |
| 8916 | CASKIN2      | 1.01 | 4.81E-01 | 7.22E-01 | 1505.14  | not significant |
| 8917 | CCDC101      | 1.01 | 3.81E-01 | 6.45E-01 | 802.02   | not significant |
| 8918 | C19orf52     | 1.01 | 4.80E-01 | 7.22E-01 | 616.48   | not significant |
| 8919 | ZNF610       | 1.01 | 3.56E-01 | 6.21E-01 | 185.37   | not significant |
| 8920 | MCM2         | 1.01 | 3.85E-01 | 6.47E-01 | 17554.91 | not significant |
| 8921 | SLC43A3      | 1.01 | 3.93E-01 | 6.54E-01 | 10683.92 | not significant |
| 8922 | SDCBP        | 1.01 | 4.56E-01 | 7.05E-01 | 2612.85  | not significant |
| 8923 | NQO2         | 1.01 | 4.92E-01 | 7.30E-01 | 632.55   | not significant |
| 8924 | FAM171A1     | 1.01 | 3.25E-01 | 5.93E-01 | 139.12   | not significant |
| 8925 | CNNM2        | 1.01 | 3.14E-01 | 5.85E-01 | 128.85   | not significant |
| 8926 | PDE7A        | 1.01 | 3.91E-01 | 6.52E-01 | 5796.38  | not significant |
| 8927 | CGGBP1       | 1.01 | 3.69E-01 | 6.33E-01 | 7690.19  | not significant |
| 8928 | XPNPPEP1     | 1.01 | 4.28E-01 | 6.82E-01 | 3350.77  | not significant |
| 8929 | CMTR1        | 1.01 | 4.36E-01 | 6.88E-01 | 3842.83  | not significant |
| 8930 | ORC3         | 1.01 | 4.58E-01 | 7.05E-01 | 1261.47  | not significant |
| 8931 | MED23        | 1.01 | 4.49E-01 | 6.99E-01 | 1943.81  | not significant |
| 8932 | LOC728554    | 1.01 | 4.03E-01 | 6.62E-01 | 264.46   | not significant |
| 8933 | TAPBP        | 1.01 | 4.70E-01 | 7.14E-01 | 870.99   | not significant |
| 8934 | ZNF521       | 1.01 | 4.90E-02 | NA       | 28.16    | not significant |
| 8935 | MRPL53       | 1.01 | 4.62E-01 | 7.09E-01 | 718.90   | not significant |
| 8936 | TMEM168      | 1.01 | 4.58E-01 | 7.05E-01 | 914.89   | not significant |
| 8937 | RPL39        | 1.01 | 4.74E-01 | 7.17E-01 | 500.29   | not significant |
| 8938 | ANKS3        | 1.01 | 4.17E-01 | 6.73E-01 | 299.10   | not significant |
| 8939 | ZNF75D       | 1.01 | 8.45E-02 | NA       | 38.53    | not significant |
| 8940 | UPF3B        | 1.01 | 4.56E-01 | 7.05E-01 | 1312.58  | not significant |
| 8941 | TAL1         | 1.01 | 4.40E-01 | 6.92E-01 | 361.76   | not significant |
| 8942 | ZNF818P      | 1.01 | 3.96E-01 | 6.56E-01 | 261.99   | not significant |
| 8943 | CFL2         | 1.01 | 4.14E-01 | 6.72E-01 | 289.62   | not significant |
| 8944 | LOC100130476 | 1.01 | 1.89E-01 | NA       | 68.59    | not significant |
| 8945 | OST4         | 1.01 | 4.25E-01 | 6.79E-01 | 2887.74  | not significant |
| 8946 | ETAA1        | 1.01 | 4.72E-01 | 7.15E-01 | 967.81   | not significant |
| 8947 | CCDC115      | 1.01 | 4.65E-01 | 7.11E-01 | 873.37   | not significant |
| 8948 | FAM110C      | 1.01 | 3.74E-01 | 6.39E-01 | 222.44   | not significant |
| 8949 | STK17B       | 1.01 | 3.85E-01 | 6.47E-01 | 9725.63  | not significant |
| 8950 | FBXW5        | 1.01 | 4.61E-01 | 7.08E-01 | 1661.78  | not significant |
| 8951 | PRUNE        | 1.01 | 4.70E-01 | 7.14E-01 | 1067.02  | not significant |
| 8952 | DEAF1        | 1.01 | 4.69E-01 | 7.14E-01 | 1092.84  | not significant |
| 8953 | AP4E1        | 1.01 | 4.71E-01 | 7.15E-01 | 959.12   | not significant |
| 8954 | SMAGP        | 1.01 | 4.29E-01 | 6.82E-01 | 365.08   | not significant |
| 8955 | KATNAL1      | 1.01 | 4.71E-01 | 7.14E-01 | 853.48   | not significant |
| 8956 | IGSF3        | 1.01 | 4.55E-01 | 7.04E-01 | 524.67   | not significant |
| 8957 | NAPRT        | 1.01 | 4.41E-01 | 6.92E-01 | 453.47   | not significant |
| 8958 | PTCD2        | 1.01 | 4.11E-01 | 6.69E-01 | 327.34   | not significant |
| 8959 | BCORP1       | 1.01 | 3.85E-01 | 6.47E-01 | 242.28   | not significant |
| 8960 | APCDD1       | 1.01 | 1.01E-01 | NA       | 42.19    | not significant |
| 8961 | FBXL8        | 1.01 | 2.02E-01 | NA       | 75.81    | not significant |
| 8962 | TMBIM6       | 1.01 | 3.20E-01 | 5.89E-01 | 32306.96 | not significant |
| 8963 | BCL10        | 1.01 | 4.70E-01 | 7.14E-01 | 789.21   | not significant |

|      |              |      |          |          |          |                 |
|------|--------------|------|----------|----------|----------|-----------------|
| 8964 | TPTEP1       | 1.01 | 4.59E-01 | 7.06E-01 | 656.15   | not significant |
| 8965 | CA5B         | 1.01 | 3.23E-01 | 5.93E-01 | 161.27   | not significant |
| 8966 | LTB4R2       | 1.01 | 2.46E-01 | NA       | 98.32    | not significant |
| 8967 | DUT          | 1.02 | 4.80E-01 | 7.22E-01 | 5803.60  | not significant |
| 8968 | PDIA6        | 1.02 | 3.28E-01 | 5.96E-01 | 13288.61 | not significant |
| 8969 | BCL7B        | 1.02 | 4.50E-01 | 6.99E-01 | 682.95   | not significant |
| 8970 | CRAMP1L      | 1.02 | 4.64E-01 | 7.11E-01 | 1636.66  | not significant |
| 8971 | S100A10      | 1.02 | 4.08E-01 | 6.66E-01 | 350.82   | not significant |
| 8972 | CLN5         | 1.02 | 3.56E-01 | 6.21E-01 | 555.55   | not significant |
| 8973 | SPRYD4       | 1.02 | 4.06E-01 | 6.65E-01 | 296.14   | not significant |
| 8974 | KIAA1841     | 1.02 | 3.81E-01 | 6.45E-01 | 211.40   | not significant |
| 8975 | RAB43        | 1.02 | 1.69E-01 | NA       | 63.52    | not significant |
| 8976 | CELF6        | 1.02 | 2.60E-01 | 5.29E-01 | 124.30   | not significant |
| 8977 | TIGD6        | 1.02 | 3.02E-01 | 5.72E-01 | 130.02   | not significant |
| 8978 | DNASE1L2     | 1.02 | 2.26E-01 | NA       | 89.72    | not significant |
| 8979 | NPHP3-ACAD11 | 1.02 | 8.06E-02 | NA       | 39.05    | not significant |
| 8980 | ATP6V0E1     | 1.02 | 4.31E-01 | 6.84E-01 | 2518.07  | not significant |
| 8981 | ERP44        | 1.02 | 4.56E-01 | 7.04E-01 | 2222.13  | not significant |
| 8982 | POF1B        | 1.02 | 4.44E-01 | 6.95E-01 | 556.88   | not significant |
| 8983 | SUMF1        | 1.02 | 3.62E-01 | 6.26E-01 | 196.27   | not significant |
| 8984 | WASH2P       | 1.02 | 2.47E-01 | 5.15E-01 | 100.76   | not significant |
| 8985 | COX7B        | 1.02 | 4.61E-01 | 7.08E-01 | 1846.62  | not significant |
| 8986 | RPS6KB2      | 1.02 | 4.00E-01 | 6.60E-01 | 2172.03  | not significant |
| 8987 | MOGS         | 1.02 | 4.60E-01 | 7.07E-01 | 1949.09  | not significant |
| 8988 | CASP6        | 1.02 | 4.63E-01 | 7.09E-01 | 1004.31  | not significant |
| 8989 | MBOAT2       | 1.02 | 4.36E-01 | 6.89E-01 | 1257.27  | not significant |
| 8990 | IFIT5        | 1.02 | 4.59E-01 | 7.06E-01 | 737.24   | not significant |
| 8991 | C15orf57     | 1.02 | 4.21E-01 | 6.76E-01 | 310.18   | not significant |
| 8992 | CLDN15       | 1.02 | 4.52E-01 | 7.01E-01 | 649.64   | not significant |
| 8993 | MPPE1        | 1.02 | 4.37E-01 | 6.90E-01 | 483.38   | not significant |
| 8994 | DSTN         | 1.02 | 4.47E-01 | 6.97E-01 | 2477.65  | not significant |
| 8995 | LSM7         | 1.02 | 4.62E-01 | 7.09E-01 | 2056.98  | not significant |
| 8996 | SAMD9        | 1.02 | 4.20E-01 | 6.75E-01 | 2605.93  | not significant |
| 8997 | RUNX2        | 1.02 | 4.11E-01 | 6.69E-01 | 1762.68  | not significant |
| 8998 | TRMT11       | 1.02 | 4.57E-01 | 7.05E-01 | 835.67   | not significant |
| 8999 | KAT2B        | 1.02 | 3.77E-01 | 6.42E-01 | 263.48   | not significant |
| 9000 | CLYBL        | 1.02 | 2.43E-01 | NA       | 100.36   | not significant |
| 9001 | COX7C        | 1.02 | 4.40E-01 | 6.92E-01 | 5277.46  | not significant |
| 9002 | COPE         | 1.02 | 4.15E-01 | 6.72E-01 | 4899.57  | not significant |
| 9003 | NIT2         | 1.02 | 4.58E-01 | 7.05E-01 | 1145.61  | not significant |
| 9004 | MRI1         | 1.02 | 4.46E-01 | 6.96E-01 | 1377.27  | not significant |
| 9005 | CPOX         | 1.02 | 4.40E-01 | 6.92E-01 | 1476.83  | not significant |
| 9006 | C20orf196    | 1.02 | 4.34E-01 | 6.88E-01 | 323.03   | not significant |
| 9007 | TUG1         | 1.02 | 4.27E-01 | 6.81E-01 | 8601.37  | not significant |
| 9008 | A1BG-AS1     | 1.02 | 4.11E-01 | 6.69E-01 | 308.83   | not significant |
| 9009 | ATP2A1       | 1.02 | 3.89E-01 | 6.50E-01 | 283.61   | not significant |
| 9010 | RPL41        | 1.02 | 2.45E-01 | 5.13E-01 | 3270.91  | not significant |
| 9011 | CENPH        | 1.02 | 4.58E-01 | 7.05E-01 | 1876.14  | not significant |
| 9012 | VPS8         | 1.02 | 4.58E-01 | 7.05E-01 | 787.60   | not significant |
| 9013 | LAGE3        | 1.02 | 4.12E-01 | 6.70E-01 | 447.24   | not significant |
| 9014 | SAYS1        | 1.02 | 4.36E-01 | 6.89E-01 | 596.85   | not significant |
| 9015 | USP20        | 1.02 | 3.57E-01 | 6.22E-01 | 7041.92  | not significant |
| 9016 | SLC39A6      | 1.02 | 4.03E-01 | 6.62E-01 | 4394.14  | not significant |
| 9017 | CENPV        | 1.02 | 4.19E-01 | 6.75E-01 | 2588.57  | not significant |
| 9018 | DHX35        | 1.02 | 4.67E-01 | 7.12E-01 | 1563.26  | not significant |
| 9019 | CHPF2        | 1.02 | 4.50E-01 | 6.99E-01 | 1639.31  | not significant |
| 9020 | IL27RA       | 1.02 | 4.25E-01 | 6.79E-01 | 2350.79  | not significant |
| 9021 | ZIC2         | 1.02 | 7.68E-02 | NA       | 39.28    | not significant |
| 9022 | IRF2BP2      | 1.02 | 4.08E-01 | 6.66E-01 | 3559.48  | not significant |
| 9023 | STMN3        | 1.02 | 4.23E-01 | 6.78E-01 | 2353.43  | not significant |
| 9024 | LAMTOR1      | 1.02 | 4.42E-01 | 6.93E-01 | 2302.18  | not significant |
| 9025 | ARID1B       | 1.02 | 4.50E-01 | 6.99E-01 | 3951.12  | not significant |
| 9026 | BACH1        | 1.02 | 4.40E-01 | 6.92E-01 | 1430.30  | not significant |
| 9027 | PPCS         | 1.02 | 4.39E-01 | 6.91E-01 | 671.36   | not significant |
| 9028 | MON2         | 1.02 | 3.86E-01 | 6.48E-01 | 2247.80  | not significant |
| 9029 | C18orf21     | 1.02 | 4.34E-01 | 6.88E-01 | 695.20   | not significant |
| 9030 | SRRM2        | 1.02 | 4.25E-01 | 6.79E-01 | 27895.03 | not significant |
| 9031 | FBXL15       | 1.02 | 3.82E-01 | 6.45E-01 | 262.71   | not significant |
| 9032 | SLC38A7      | 1.02 | 4.20E-01 | 6.75E-01 | 522.28   | not significant |
| 9033 | SZT2         | 1.02 | 2.60E-01 | 5.30E-01 | 1754.95  | not significant |
| 9034 | VLDLR-AS1    | 1.02 | 3.64E-02 | NA       | 29.33    | not significant |
| 9035 | ANXA11       | 1.02 | 4.22E-01 | 6.77E-01 | 3052.78  | not significant |
| 9036 | ABCD3        | 1.02 | 3.98E-01 | 6.58E-01 | 3974.00  | not significant |
| 9037 | DHX40        | 1.02 | 4.21E-01 | 6.76E-01 | 2123.08  | not significant |
| 9038 | B3GALT6      | 1.02 | 4.41E-01 | 6.93E-01 | 1384.16  | not significant |
| 9039 | RPA3OS       | 1.02 | 4.50E-01 | 6.99E-01 | 789.79   | not significant |
| 9040 | KBTBD7       | 1.02 | 4.19E-01 | 6.75E-01 | 557.99   | not significant |
| 9041 | NPIP3        | 1.02 | 3.37E-01 | 6.05E-01 | 196.26   | not significant |
| 9042 | GNAO1        | 1.02 | 3.03E-01 | 5.75E-01 | 151.97   | not significant |
| 9043 | TIGD7        | 1.02 | 1.32E-01 | NA       | 54.10    | not significant |
| 9044 | ACRBP        | 1.02 | 1.97E-02 | NA       | 22.65    | not significant |
| 9045 | RHOA         | 1.02 | 4.97E-01 | 7.35E-01 | 19092.74 | not significant |
| 9046 | ECT2         | 1.02 | 4.05E-01 | 6.64E-01 | 3043.35  | not significant |
| 9047 | PSMA7        | 1.02 | 4.08E-01 | 6.66E-01 | 7185.53  | not significant |
| 9048 | ZNF598       | 1.02 | 4.05E-01 | 6.63E-01 | 2946.99  | not significant |
| 9049 | ELP2         | 1.02 | 4.47E-01 | 6.97E-01 | 1469.46  | not significant |
| 9050 | BRI3BP       | 1.02 | 4.42E-01 | 6.93E-01 | 1634.23  | not significant |
| 9051 | RNF24        | 1.02 | 4.48E-01 | 6.98E-01 | 1679.91  | not significant |

|      |              |      |          |          |          |                 |
|------|--------------|------|----------|----------|----------|-----------------|
| 9052 | ATPAF2       | 1.02 | 4.22E-01 | 6.76E-01 | 458.92   | not significant |
| 9053 | ZNF284       | 1.02 | 3.07E-01 | 5.78E-01 | 156.52   | not significant |
| 9054 | LOC153684    | 1.02 | 1.55E-01 | NA       | 65.42    | not significant |
| 9055 | TMPPE        | 1.02 | 2.57E-01 | 5.25E-01 | 152.89   | not significant |
| 9056 | DLGAP1-AS1   | 1.02 | 1.13E-01 | NA       | 57.46    | not significant |
| 9057 | EIF2S3       | 1.02 | 3.30E-01 | 5.98E-01 | 7986.09  | not significant |
| 9058 | RPL3         | 1.02 | 3.80E-01 | 6.44E-01 | 38612.96 | not significant |
| 9059 | DNMT3A       | 1.02 | 3.93E-01 | 6.53E-01 | 3849.65  | not significant |
| 9060 | TRAPPC2L     | 1.02 | 4.46E-01 | 6.96E-01 | 969.12   | not significant |
| 9061 | EPN1         | 1.02 | 4.10E-01 | 6.68E-01 | 2547.89  | not significant |
| 9062 | ZNF346       | 1.02 | 4.48E-01 | 6.98E-01 | 1070.41  | not significant |
| 9063 | HGSNAT       | 1.02 | 4.45E-01 | 6.96E-01 | 1377.28  | not significant |
| 9064 | THOC3        | 1.02 | 4.19E-01 | 6.75E-01 | 427.24   | not significant |
| 9065 | DGAT2        | 1.02 | 3.40E-01 | 6.08E-01 | 201.05   | not significant |
| 9066 | PECR         | 1.02 | 1.35E-01 | NA       | 59.81    | not significant |
| 9067 | RPA2         | 1.02 | 4.07E-01 | 6.65E-01 | 4988.62  | not significant |
| 9068 | ZC3H7A       | 1.02 | 4.11E-01 | 6.69E-01 | 2733.34  | not significant |
| 9069 | CHD2         | 1.02 | 3.95E-01 | 6.55E-01 | 2719.87  | not significant |
| 9070 | PANX1        | 1.02 | 4.43E-01 | 6.93E-01 | 1550.13  | not significant |
| 9071 | POMT1        | 1.02 | 3.25E-01 | 5.94E-01 | 584.31   | not significant |
| 9072 | RBBP7        | 1.02 | 3.25E-01 | 5.93E-01 | 8726.58  | not significant |
| 9073 | XRN2         | 1.02 | 3.24E-01 | 5.93E-01 | 8040.10  | not significant |
| 9074 | MAGED2       | 1.02 | 4.95E-01 | 7.33E-01 | 2051.48  | not significant |
| 9075 | MIEN1        | 1.02 | 4.72E-01 | 7.15E-01 | 1599.70  | not significant |
| 9076 | FNTA         | 1.02 | 4.25E-01 | 6.79E-01 | 2116.12  | not significant |
| 9077 | MBD6         | 1.02 | 3.97E-01 | 6.56E-01 | 2055.24  | not significant |
| 9078 | INTS4        | 1.02 | 4.42E-01 | 6.93E-01 | 1173.63  | not significant |
| 9079 | TRAI P       | 1.02 | 4.24E-01 | 6.78E-01 | 897.39   | not significant |
| 9080 | ZNF414       | 1.02 | 4.15E-01 | 6.72E-01 | 502.37   | not significant |
| 9081 | DHRS7B       | 1.02 | 3.65E-01 | 6.29E-01 | 240.99   | not significant |
| 9082 | VCPKMT       | 1.02 | 2.53E-01 | 5.21E-01 | 575.38   | not significant |
| 9083 | ZNF441       | 1.02 | 3.38E-01 | 6.06E-01 | 197.25   | not significant |
| 9084 | NEDD4L       | 1.02 | 2.78E-01 | 5.48E-01 | 141.80   | not significant |
| 9085 | TMEM19       | 1.02 | 5.02E-01 | 7.38E-01 | 1732.80  | not significant |
| 9086 | PLEKHO1      | 1.02 | 4.45E-01 | 6.96E-01 | 1012.91  | not significant |
| 9087 | GORAB        | 1.02 | 4.22E-01 | 6.77E-01 | 489.79   | not significant |
| 9088 | PCDH12       | 1.02 | 2.13E-01 | NA       | 93.05    | not significant |
| 9089 | MTA3         | 1.02 | 4.08E-01 | 6.66E-01 | 2428.99  | not significant |
| 9090 | UFD1L        | 1.02 | 4.18E-01 | 6.73E-01 | 2883.05  | not significant |
| 9091 | ZZEF1        | 1.02 | 4.23E-01 | 6.77E-01 | 3500.58  | not significant |
| 9092 | APOBEC3C     | 1.02 | 4.28E-01 | 6.82E-01 | 1829.49  | not significant |
| 9093 | KRI1         | 1.02 | 4.11E-01 | 6.69E-01 | 2172.91  | not significant |
| 9094 | RPL24        | 1.02 | 4.07E-01 | 6.65E-01 | 10559.59 | not significant |
| 9095 | KLRG1        | 1.02 | 1.06E-01 | NA       | 51.71    | not significant |
| 9096 | CHAF1A       | 1.02 | 3.80E-01 | 6.45E-01 | 5239.24  | not significant |
| 9097 | RFC2         | 1.02 | 4.17E-01 | 6.73E-01 | 2009.86  | not significant |
| 9098 | KLHL7        | 1.02 | 4.37E-01 | 6.90E-01 | 1436.91  | not significant |
| 9099 | RUSC1        | 1.02 | 4.00E-01 | 6.59E-01 | 1245.07  | not significant |
| 9100 | RELT         | 1.02 | 4.38E-01 | 6.90E-01 | 1017.09  | not significant |
| 9101 | TRIM4        | 1.02 | 4.01E-01 | 6.60E-01 | 1263.63  | not significant |
| 9102 | LOC648987    | 1.02 | 4.05E-01 | 6.63E-01 | 531.67   | not significant |
| 9103 | LRRC37A4P    | 1.02 | 3.41E-01 | 6.08E-01 | 1890.58  | not significant |
| 9104 | ZXDA         | 1.02 | 3.07E-01 | 5.78E-01 | 177.82   | not significant |
| 9105 | PTOV1        | 1.02 | 4.02E-01 | 6.61E-01 | 3619.87  | not significant |
| 9106 | TMEM26       | 1.02 | 4.37E-01 | 6.89E-01 | 949.33   | not significant |
| 9107 | ABCB6        | 1.02 | 4.15E-01 | 6.72E-01 | 451.98   | not significant |
| 9108 | FAM184A      | 1.02 | 3.73E-01 | 6.38E-01 | 300.34   | not significant |
| 9109 | PET100       | 1.02 | 2.73E-01 | 5.43E-01 | 594.28   | not significant |
| 9110 | ZKSCAN7      | 1.02 | 2.77E-01 | 5.47E-01 | 156.81   | not significant |
| 9111 | DIAPH1       | 1.02 | 3.62E-01 | 6.26E-01 | 17916.97 | not significant |
| 9112 | ZDHHC2       | 1.02 | 4.09E-01 | 6.67E-01 | 2062.21  | not significant |
| 9113 | CIR1         | 1.02 | 4.36E-01 | 6.89E-01 | 904.18   | not significant |
| 9114 | ATXN7        | 1.02 | 5.10E-01 | 7.44E-01 | 1267.04  | not significant |
| 9115 | EEDP1        | 1.02 | 4.35E-01 | 6.88E-01 | 1146.97  | not significant |
| 9116 | HSD17B7      | 1.02 | 4.02E-01 | 6.61E-01 | 403.37   | not significant |
| 9117 | C5orf34      | 1.02 | 3.85E-01 | 6.47E-01 | 335.06   | not significant |
| 9118 | SMIM14       | 1.02 | 2.31E-01 | 4.99E-01 | 103.23   | not significant |
| 9119 | EPS15        | 1.02 | 4.01E-01 | 6.60E-01 | 2775.52  | not significant |
| 9120 | RTCA         | 1.02 | 4.24E-01 | 6.78E-01 | 1470.23  | not significant |
| 9121 | PITPNM2      | 1.02 | 4.24E-01 | 6.79E-01 | 3256.26  | not significant |
| 9122 | TMEM120B     | 1.02 | 5.20E-01 | 7.50E-01 | 1449.60  | not significant |
| 9123 | KIAA1731     | 1.02 | 4.32E-01 | 6.86E-01 | 1488.66  | not significant |
| 9124 | LOC101927027 | 1.02 | 4.17E-01 | 6.73E-01 | 544.45   | not significant |
| 9125 | IFT88        | 1.02 | 3.78E-01 | 6.43E-01 | 342.98   | not significant |
| 9126 | TAZ          | 1.02 | 3.57E-01 | 6.22E-01 | 276.54   | not significant |
| 9127 | ZNF821       | 1.02 | 2.49E-02 | NA       | 25.46    | not significant |
| 9128 | PLCL1        | 1.02 | 7.26E-02 | NA       | 41.40    | not significant |
| 9129 | UBE2R2       | 1.02 | 3.65E-01 | 6.29E-01 | 4696.92  | not significant |
| 9130 | ACTL6A       | 1.02 | 3.68E-01 | 6.32E-01 | 3197.92  | not significant |
| 9131 | CISD2        | 1.02 | 4.31E-01 | 6.85E-01 | 1014.69  | not significant |
| 9132 | NAA16        | 1.02 | 4.42E-01 | 6.93E-01 | 1667.61  | not significant |
| 9133 | CES3         | 1.02 | 4.21E-01 | 6.76E-01 | 583.49   | not significant |
| 9134 | SH2D3A       | 1.02 | 1.49E-01 | NA       | 65.97    | not significant |
| 9135 | ZKSCAN1      | 1.02 | 4.00E-01 | 6.59E-01 | 4487.10  | not significant |
| 9136 | PPP1R16A     | 1.02 | 4.28E-01 | 6.82E-01 | 791.00   | not significant |
| 9137 | TSKS         | 1.02 | 3.06E-01 | 5.78E-01 | 177.26   | not significant |
| 9138 | KCNG3        | 1.02 | 2.52E-01 | 5.21E-01 | 125.37   | not significant |
| 9139 | LOC100289230 | 1.02 | 6.10E-02 | NA       | 38.16    | not significant |

|      |              |      |          |          |          |                 |
|------|--------------|------|----------|----------|----------|-----------------|
| 9140 | RPUSD4       | 1.02 | 4.72E-01 | 7.15E-01 | 1354.15  | not significant |
| 9141 | HNRNPDL      | 1.02 | 3.10E-01 | 5.81E-01 | 15934.21 | not significant |
| 9142 | COX15        | 1.02 | 4.75E-01 | 7.17E-01 | 1898.78  | not significant |
| 9143 | PAGR1        | 1.02 | 4.17E-01 | 6.73E-01 | 2290.92  | not significant |
| 9144 | PSMB10       | 1.02 | 4.24E-01 | 6.78E-01 | 2409.13  | not significant |
| 9145 | NDUFB5       | 1.02 | 3.77E-01 | 6.42E-01 | 2133.42  | not significant |
| 9146 | NMI          | 1.02 | 3.97E-01 | 6.57E-01 | 2786.15  | not significant |
| 9147 | ATP6V1F      | 1.02 | 3.84E-01 | 6.47E-01 | 2640.50  | not significant |
| 9148 | HMGXB4       | 1.02 | 3.98E-01 | 6.58E-01 | 2424.35  | not significant |
| 9149 | CMC1         | 1.02 | 4.26E-01 | 6.80E-01 | 883.65   | not significant |
| 9150 | DCAF8        | 1.02 | 3.81E-01 | 6.45E-01 | 2661.64  | not significant |
| 9151 | BMPR1A       | 1.02 | 4.02E-01 | 6.61E-01 | 415.11   | not significant |
| 9152 | CCRL2        | 1.02 | 3.40E-01 | 6.07E-01 | 249.62   | not significant |
| 9153 | CKB          | 1.02 | 2.32E-01 | 5.00E-01 | 117.35   | not significant |
| 9154 | APLF         | 1.02 | 2.41E-01 | 5.10E-01 | 130.89   | not significant |
| 9155 | MCF2L2       | 1.02 | 1.31E-01 | NA       | 63.91    | not significant |
| 9156 | KIAA1147     | 1.02 | 9.93E-02 | NA       | 37.40    | not significant |
| 9157 | AARS2        | 1.02 | 4.23E-01 | 6.78E-01 | 1791.29  | not significant |
| 9158 | G6PC3        | 1.02 | 3.51E-01 | 6.18E-01 | 269.84   | not significant |
| 9159 | FAM174A      | 1.02 | 2.90E-01 | 5.62E-01 | 158.17   | not significant |
| 9160 | SLC22A23     | 1.02 | 3.41E-01 | 6.08E-01 | 248.61   | not significant |
| 9161 | ATP5E        | 1.02 | 1.82E-01 | 4.39E-01 | 102.52   | not significant |
| 9162 | BTF3L4       | 1.02 | 3.82E-01 | 6.46E-01 | 2410.18  | not significant |
| 9163 | SPIN1        | 1.02 | 3.75E-01 | 6.39E-01 | 4284.80  | not significant |
| 9164 | SYNE1        | 1.02 | 4.74E-01 | 7.17E-01 | 1245.15  | not significant |
| 9165 | WRB          | 1.02 | 4.15E-01 | 6.72E-01 | 921.39   | not significant |
| 9166 | ZNF319       | 1.02 | 4.06E-01 | 6.65E-01 | 636.90   | not significant |
| 9167 | CCDC57       | 1.02 | 4.15E-01 | 6.72E-01 | 722.77   | not significant |
| 9168 | SLC7A5       | 1.02 | 3.01E-01 | 5.71E-01 | 38763.06 | not significant |
| 9169 | LOC728743    | 1.02 | 4.18E-01 | 6.74E-01 | 1431.64  | not significant |
| 9170 | PIGC         | 1.02 | 4.21E-01 | 6.76E-01 | 1118.71  | not significant |
| 9171 | TRMT2B       | 1.02 | 4.06E-01 | 6.65E-01 | 1519.26  | not significant |
| 9172 | RABEP2       | 1.02 | 4.16E-01 | 6.72E-01 | 697.53   | not significant |
| 9173 | SMIM19       | 1.02 | 3.72E-01 | 6.37E-01 | 363.82   | not significant |
| 9174 | EMP3         | 1.02 | 3.64E-01 | 6.28E-01 | 330.38   | not significant |
| 9175 | SETBP1       | 1.02 | 2.70E-01 | 5.41E-01 | 144.25   | not significant |
| 9176 | CD3D         | 1.02 | 4.24E-01 | 6.79E-01 | 16495.38 | not significant |
| 9177 | POLR2H       | 1.02 | 3.94E-01 | 6.54E-01 | 2253.42  | not significant |
| 9178 | RPS9         | 1.02 | 4.03E-01 | 6.62E-01 | 6430.65  | not significant |
| 9179 | GLCE         | 1.02 | 1.24E-01 | NA       | 65.16    | not significant |
| 9180 | PIK3CA       | 1.02 | 4.76E-01 | 7.18E-01 | 1179.66  | not significant |
| 9181 | ATG9A        | 1.02 | 4.18E-01 | 6.73E-01 | 1252.51  | not significant |
| 9182 | ABTB2        | 1.02 | 3.73E-01 | 6.38E-01 | 323.63   | not significant |
| 9183 | CPPED1       | 1.02 | 4.13E-01 | 6.71E-01 | 1421.25  | not significant |
| 9184 | LSM6         | 1.02 | 4.21E-01 | 6.76E-01 | 1588.25  | not significant |
| 9185 | ZBTB26       | 1.02 | 3.73E-01 | 6.38E-01 | 333.05   | not significant |
| 9186 | SP140        | 1.02 | 4.16E-01 | 6.72E-01 | 653.15   | not significant |
| 9187 | ZNF175       | 1.02 | 4.11E-01 | 6.69E-01 | 879.63   | not significant |
| 9188 | ST3GAL3      | 1.02 | 3.63E-01 | 6.27E-01 | 317.82   | not significant |
| 9189 | PHC1         | 1.02 | 3.82E-01 | 6.45E-01 | 378.46   | not significant |
| 9190 | PPP2R2D      | 1.02 | 3.41E-01 | 6.08E-01 | 259.44   | not significant |
| 9191 | GALC         | 1.02 | 3.20E-01 | 5.89E-01 | 217.21   | not significant |
| 9192 | NANOS1       | 1.02 | 2.18E-01 | 4.84E-01 | 113.59   | not significant |
| 9193 | RGPD4        | 1.02 | 2.44E-02 | NA       | 27.22    | not significant |
| 9194 | DNAJC9       | 1.02 | 3.65E-01 | 6.30E-01 | 4971.28  | not significant |
| 9195 | RAB8B        | 1.02 | 3.68E-01 | 6.33E-01 | 3952.65  | not significant |
| 9196 | OXC11        | 1.02 | 3.60E-01 | 6.25E-01 | 3838.93  | not significant |
| 9197 | BABAM1       | 1.02 | 3.83E-01 | 6.46E-01 | 2283.66  | not significant |
| 9198 | NAB1         | 1.02 | 4.08E-01 | 6.66E-01 | 1764.93  | not significant |
| 9199 | CHD3         | 1.02 | 3.85E-01 | 6.47E-01 | 3174.78  | not significant |
| 9200 | FBXW4        | 1.02 | 4.17E-01 | 6.73E-01 | 956.46   | not significant |
| 9201 | DDX58        | 1.02 | 3.95E-01 | 6.54E-01 | 1318.46  | not significant |
| 9202 | HAUS8        | 1.02 | 3.93E-01 | 6.54E-01 | 812.12   | not significant |
| 9203 | SNX16        | 1.02 | 3.87E-01 | 6.48E-01 | 390.67   | not significant |
| 9204 | LSAMP        | 1.02 | 3.76E-01 | 6.40E-01 | 427.66   | not significant |
| 9205 | MALAT1       | 1.02 | 2.04E-01 | 4.69E-01 | 7215.43  | not significant |
| 9206 | MPC2         | 1.02 | 3.83E-01 | 6.46E-01 | 2550.83  | not significant |
| 9207 | MIB1         | 1.02 | 3.67E-01 | 6.31E-01 | 2632.03  | not significant |
| 9208 | LOC101926963 | 1.02 | 2.17E-01 | 4.83E-01 | 117.90   | not significant |
| 9209 | ZFHX3        | 1.02 | 3.16E-01 | 5.86E-01 | 243.86   | not significant |
| 9210 | PAFAH1B3     | 1.02 | 4.25E-01 | 6.79E-01 | 2043.40  | not significant |
| 9211 | ZFAS1        | 1.02 | 4.02E-01 | 6.61E-01 | 3701.15  | not significant |
| 9212 | IFNAR1       | 1.02 | 3.79E-01 | 6.44E-01 | 3298.24  | not significant |
| 9213 | IL16         | 1.02 | 3.77E-01 | 6.42E-01 | 2319.05  | not significant |
| 9214 | MTHFR        | 1.02 | 4.13E-01 | 6.70E-01 | 1061.09  | not significant |
| 9215 | PANK1        | 1.02 | 4.11E-01 | 6.69E-01 | 868.43   | not significant |
| 9216 | PTBP2        | 1.02 | 4.11E-01 | 6.69E-01 | 735.61   | not significant |
| 9217 | IMMP2L       | 1.02 | 3.12E-01 | 5.83E-01 | 211.87   | not significant |
| 9218 | IQGAP2       | 1.02 | 3.59E-01 | 6.24E-01 | 4644.37  | not significant |
| 9219 | LRP5         | 1.02 | 4.01E-01 | 6.60E-01 | 650.04   | not significant |
| 9220 | RPS6KA5      | 1.02 | 3.82E-01 | 6.45E-01 | 413.48   | not significant |
| 9221 | SNHG21       | 1.02 | 2.31E-01 | 4.99E-01 | 122.02   | not significant |
| 9222 | ILVBL        | 1.02 | 4.38E-01 | 6.90E-01 | 1325.82  | not significant |
| 9223 | CDADC1       | 1.02 | 3.80E-01 | 6.44E-01 | 556.66   | not significant |
| 9224 | TRIM45       | 1.02 | 1.19E-01 | NA       | 63.74    | not significant |
| 9225 | KLHDC3       | 1.02 | 3.43E-01 | 6.09E-01 | 4204.94  | not significant |
| 9226 | KIAA0391     | 1.02 | 3.86E-01 | 6.48E-01 | 1760.00  | not significant |
| 9227 | GPX4         | 1.02 | 3.60E-01 | 6.25E-01 | 4549.94  | not significant |

|      |                  |      |          |          |          |                 |
|------|------------------|------|----------|----------|----------|-----------------|
| 9228 | UBXN11           | 1.02 | 3.74E-01 | 6.38E-01 | 428.92   | not significant |
| 9229 | SLC17A5          | 1.02 | 3.29E-01 | 5.97E-01 | 244.79   | not significant |
| 9230 | CTNNA1           | 1.02 | 3.75E-01 | 6.40E-01 | 3559.84  | not significant |
| 9231 | MTMR14           | 1.02 | 4.63E-01 | 7.10E-01 | 1263.68  | not significant |
| 9232 | PRPF39           | 1.02 | 3.85E-01 | 6.47E-01 | 2014.81  | not significant |
| 9233 | LRCH1            | 1.02 | 4.04E-01 | 6.63E-01 | 1414.27  | not significant |
| 9234 | MSH3             | 1.02 | 3.70E-01 | 6.35E-01 | 1280.92  | not significant |
| 9235 | DNLZ             | 1.02 | 3.94E-01 | 6.54E-01 | 691.75   | not significant |
| 9236 | SLC2A13          | 1.02 | 3.56E-01 | 6.21E-01 | 379.05   | not significant |
| 9237 | OTX1             | 1.02 | 2.63E-01 | 5.34E-01 | 150.37   | not significant |
| 9238 | PLEKHM1          | 1.02 | 3.87E-01 | 6.49E-01 | 1408.96  | not significant |
| 9239 | ARNTL            | 1.02 | 3.79E-01 | 6.44E-01 | 432.13   | not significant |
| 9240 | RGCC             | 1.02 | 3.50E-01 | 6.17E-01 | 510.24   | not significant |
| 9241 | KIAA0226L        | 1.02 | 3.91E-01 | 6.52E-01 | 556.94   | not significant |
| 9242 | C1RL             | 1.02 | 2.71E-01 | 5.42E-01 | 162.74   | not significant |
| 9243 | ISL2             | 1.02 | 2.95E-01 | 5.66E-01 | 201.18   | not significant |
| 9244 | USP30-AS1        | 1.02 | 1.93E-01 | 4.54E-01 | 111.32   | not significant |
| 9245 | SF3B5            | 1.02 | 3.92E-01 | 6.53E-01 | 3868.33  | not significant |
| 9246 | DERA             | 1.02 | 3.98E-01 | 6.58E-01 | 855.51   | not significant |
| 9247 | PTPRN2           | 1.02 | 3.98E-01 | 6.58E-01 | 852.43   | not significant |
| 9248 | ILDR2            | 1.02 | 3.91E-01 | 6.52E-01 | 661.40   | not significant |
| 9249 | GPR153           | 1.02 | 3.44E-01 | 6.10E-01 | 280.93   | not significant |
| 9250 | FUK              | 1.02 | 3.72E-01 | 6.37E-01 | 390.78   | not significant |
| 9251 | SCNN1D           | 1.02 | 2.00E-01 | 4.64E-01 | 104.61   | not significant |
| 9252 | IFITM1           | 1.02 | 3.35E-01 | 6.04E-01 | 5028.07  | not significant |
| 9253 | NENF             | 1.02 | 3.94E-01 | 6.54E-01 | 889.12   | not significant |
| 9254 | DPY19L3          | 1.02 | 3.95E-01 | 6.55E-01 | 1122.53  | not significant |
| 9255 | CPNE5            | 1.02 | 3.54E-01 | 6.19E-01 | 343.51   | not significant |
| 9256 | RGL2             | 1.02 | 3.18E-01 | 5.87E-01 | 250.17   | not significant |
| 9257 | KIAA1109         | 1.02 | 3.40E-01 | 6.08E-01 | 2291.94  | not significant |
| 9258 | PRKCQ            | 1.02 | 3.53E-01 | 6.19E-01 | 1915.01  | not significant |
| 9259 | EHMT2            | 1.02 | 3.62E-01 | 6.26E-01 | 2255.36  | not significant |
| 9260 | SLC15A4          | 1.02 | 3.99E-01 | 6.58E-01 | 1042.98  | not significant |
| 9261 | XYLT2            | 1.02 | 3.98E-01 | 6.58E-01 | 1057.94  | not significant |
| 9262 | LOC100506469     | 1.02 | 2.56E-01 | 5.25E-01 | 165.72   | not significant |
| 9263 | ZNF827           | 1.02 | 2.43E-01 | 5.11E-01 | 147.59   | not significant |
| 9264 | DET1             | 1.02 | 2.10E-01 | 4.74E-01 | 129.54   | not significant |
| 9265 | MESP1            | 1.02 | 6.07E-02 | NA       | 45.57    | not significant |
| 9266 | KDELRL2          | 1.02 | 3.54E-01 | 6.19E-01 | 3893.97  | not significant |
| 9267 | FBRS1.1          | 1.02 | 3.35E-01 | 6.04E-01 | 3378.90  | not significant |
| 9268 | LRRC20           | 1.02 | 3.96E-01 | 6.55E-01 | 1307.67  | not significant |
| 9269 | RBBP9            | 1.02 | 3.96E-01 | 6.56E-01 | 1158.40  | not significant |
| 9270 | ADAM17           | 1.02 | 3.92E-01 | 6.53E-01 | 1466.54  | not significant |
| 9271 | HSDL2            | 1.02 | 4.00E-01 | 6.59E-01 | 1035.10  | not significant |
| 9272 | ARL6             | 1.02 | 2.09E-01 | 4.74E-01 | 120.05   | not significant |
| 9273 | YPEL3            | 1.02 | 9.42E-02 | NA       | 55.51    | not significant |
| 9274 | NDRG1            | 1.02 | 3.54E-01 | 6.19E-01 | 2474.39  | not significant |
| 9275 | RANBP6           | 1.02 | 3.58E-01 | 6.23E-01 | 2329.26  | not significant |
| 9276 | KLHL9            | 1.02 | 3.85E-01 | 6.47E-01 | 2201.73  | not significant |
| 9277 | TMEM14A          | 1.02 | 3.96E-01 | 6.55E-01 | 691.49   | not significant |
| 9278 | SNAPC2           | 1.02 | 3.83E-01 | 6.46E-01 | 617.59   | not significant |
| 9279 | GK               | 1.02 | 3.20E-01 | 5.90E-01 | 308.02   | not significant |
| 9280 | ADPRM            | 1.02 | 2.34E-01 | 5.01E-01 | 139.61   | not significant |
| 9281 | ZNF695           | 1.02 | 2.05E-01 | 4.70E-01 | 125.17   | not significant |
| 9282 | DNAJC12          | 1.02 | 5.37E-02 | NA       | 43.13    | not significant |
| 9283 | BCL2             | 1.02 | 3.45E-01 | 6.12E-01 | 4880.37  | not significant |
| 9284 | MKKS             | 1.02 | 3.84E-01 | 6.47E-01 | 1750.34  | not significant |
| 9285 | LOC101927497     | 1.02 | 3.91E-01 | 6.52E-01 | 1025.68  | not significant |
| 9286 | STAG3L5P-PVRIG2I | 1.02 | 3.89E-01 | 6.51E-01 | 1025.77  | not significant |
| 9287 | GATAD1           | 1.02 | 3.91E-01 | 6.52E-01 | 764.08   | not significant |
| 9288 | LINC00662        | 1.02 | 2.30E-01 | 4.97E-01 | 129.41   | not significant |
| 9289 | PTPN6            | 1.02 | 3.79E-01 | 6.44E-01 | 1834.50  | not significant |
| 9290 | SCAMP1           | 1.02 | 3.84E-01 | 6.47E-01 | 1533.57  | not significant |
| 9291 | APOL1            | 1.02 | 3.92E-01 | 6.53E-01 | 923.72   | not significant |
| 9292 | PACS1            | 1.02 | 3.94E-01 | 6.54E-01 | 950.05   | not significant |
| 9293 | FBXL12           | 1.02 | 3.35E-01 | 6.04E-01 | 637.19   | not significant |
| 9294 | RAB44            | 1.02 | 3.09E-01 | 5.81E-01 | 322.35   | not significant |
| 9295 | PCBP1            | 1.02 | 2.80E-01 | 5.51E-01 | 13232.06 | not significant |
| 9296 | DLST             | 1.02 | 3.34E-01 | 6.03E-01 | 3752.67  | not significant |
| 9297 | ADA              | 1.02 | 3.26E-01 | 5.94E-01 | 21008.54 | not significant |
| 9298 | STAT1            | 1.02 | 2.85E-01 | 5.56E-01 | 6563.20  | not significant |
| 9299 | LBR              | 1.02 | 2.83E-01 | 5.53E-01 | 14864.67 | not significant |
| 9300 | ATP6AP1          | 1.02 | 4.04E-01 | 6.63E-01 | 661.08   | not significant |
| 9301 | FAM3A            | 1.02 | 2.94E-01 | 5.65E-01 | 205.43   | not significant |
| 9302 | PCYT1B           | 1.02 | 3.04E-01 | 5.76E-01 | 193.53   | not significant |
| 9303 | LIG4             | 1.02 | 3.50E-01 | 6.17E-01 | 2361.70  | not significant |
| 9304 | LRRC14           | 1.02 | 3.79E-01 | 6.44E-01 | 1852.15  | not significant |
| 9305 | POLR2K           | 1.02 | 3.87E-01 | 6.48E-01 | 2388.93  | not significant |
| 9306 | TELO2            | 1.02 | 3.52E-01 | 6.19E-01 | 2313.70  | not significant |
| 9307 | PDCD10           | 1.02 | 3.74E-01 | 6.38E-01 | 2257.41  | not significant |
| 9308 | LCMT1            | 1.02 | 3.89E-01 | 6.51E-01 | 922.72   | not significant |
| 9309 | SUCO             | 1.02 | 3.82E-01 | 6.45E-01 | 2027.91  | not significant |
| 9310 | FIG4             | 1.02 | 2.52E-01 | 5.21E-01 | 543.98   | not significant |
| 9311 | TESC             | 1.02 | 3.52E-01 | 6.19E-01 | 4969.65  | not significant |
| 9312 | ARL14EP          | 1.02 | 3.87E-01 | 6.49E-01 | 885.26   | not significant |
| 9313 | FUT8-AS1         | 1.02 | 8.59E-02 | NA       | 60.09    | not significant |
| 9314 | CPSF7            | 1.02 | 3.00E-01 | 5.71E-01 | 6937.50  | not significant |
| 9315 | PATZ1            | 1.02 | 3.52E-01 | 6.19E-01 | 2973.32  | not significant |

|      |              |      |          |          |          |                 |
|------|--------------|------|----------|----------|----------|-----------------|
| 9316 | NNT          | 1.02 | 3.18E-01 | 5.87E-01 | 5353.30  | not significant |
| 9317 | NAT9         | 1.02 | 3.87E-01 | 6.48E-01 | 995.72   | not significant |
| 9318 | KMT2B        | 1.02 | 3.42E-01 | 6.09E-01 | 3546.08  | not significant |
| 9319 | TMCO3        | 1.02 | 3.87E-01 | 6.48E-01 | 1117.53  | not significant |
| 9320 | VPS13D       | 1.02 | 3.83E-01 | 6.46E-01 | 2189.89  | not significant |
| 9321 | RUFY2        | 1.02 | 3.15E-01 | 5.86E-01 | 338.17   | not significant |
| 9322 | ADRBK1       | 1.02 | 2.71E-01 | 5.41E-01 | 14045.78 | not significant |
| 9323 | BSG          | 1.02 | 3.18E-01 | 5.88E-01 | 10116.67 | not significant |
| 9324 | TTC39C       | 1.02 | 3.84E-01 | 6.47E-01 | 872.83   | not significant |
| 9325 | SIK2         | 1.02 | 3.81E-01 | 6.45E-01 | 1173.08  | not significant |
| 9326 | LOC101928710 | 1.02 | 2.39E-01 | 5.07E-01 | 156.17   | not significant |
| 9327 | GOLGB1       | 1.02 | 3.43E-01 | 6.10E-01 | 1996.97  | not significant |
| 9328 | SAMD1        | 1.02 | 3.52E-01 | 6.19E-01 | 1345.16  | not significant |
| 9329 | LACTB2       | 1.02 | 3.25E-01 | 5.93E-01 | 309.34   | not significant |
| 9330 | RPS27A       | 1.02 | 2.97E-01 | 5.68E-01 | 11518.39 | not significant |
| 9331 | TNK1         | 1.02 | 1.17E-01 | NA       | 78.30    | not significant |
| 9332 | WDR83OS      | 1.02 | 3.78E-01 | 6.43E-01 | 1481.33  | not significant |
| 9333 | PAN3         | 1.02 | 3.45E-01 | 6.11E-01 | 2548.99  | not significant |
| 9334 | KAT2A        | 1.02 | 3.64E-01 | 6.28E-01 | 1864.48  | not significant |
| 9335 | NEDD4        | 1.02 | 3.81E-01 | 6.45E-01 | 1463.17  | not significant |
| 9336 | CCHCR1       | 1.02 | 3.78E-01 | 6.43E-01 | 752.14   | not significant |
| 9337 | GPATCH2      | 1.02 | 3.74E-01 | 6.38E-01 | 676.15   | not significant |
| 9338 | LHX4-AS1     | 1.02 | 2.28E-01 | 4.95E-01 | 159.23   | not significant |
| 9339 | C6orf226     | 1.02 | 1.74E-01 | NA       | 100.42   | not significant |
| 9340 | ARHGEF9      | 1.02 | 1.91E-01 | 4.51E-01 | 115.84   | not significant |
| 9341 | HAUS1        | 1.02 | 3.73E-01 | 6.38E-01 | 1921.40  | not significant |
| 9342 | CWC25        | 1.02 | 3.57E-01 | 6.22E-01 | 1489.52  | not significant |
| 9343 | SRBD1        | 1.02 | 3.81E-01 | 6.45E-01 | 1448.45  | not significant |
| 9344 | ERG          | 1.02 | 3.69E-01 | 6.34E-01 | 1363.30  | not significant |
| 9345 | TYSND1       | 1.02 | 3.81E-01 | 6.45E-01 | 1022.80  | not significant |
| 9346 | FAM129A      | 1.02 | 3.69E-01 | 6.33E-01 | 655.56   | not significant |
| 9347 | PLP2         | 1.02 | 2.67E-01 | 5.38E-01 | 559.67   | not significant |
| 9348 | HSCB         | 1.02 | 3.15E-01 | 5.86E-01 | 313.80   | not significant |
| 9349 | C8orf76      | 1.02 | 1.97E-01 | 4.61E-01 | 115.38   | not significant |
| 9350 | MTURN        | 1.02 | 1.64E-01 | NA       | 97.33    | not significant |
| 9351 | HCLS1        | 1.02 | 3.28E-01 | 5.96E-01 | 5100.12  | not significant |
| 9352 | METAP1       | 1.02 | 3.23E-01 | 5.93E-01 | 3591.81  | not significant |
| 9353 | BAG6         | 1.02 | 2.98E-01 | 5.68E-01 | 4531.05  | not significant |
| 9354 | GGCT         | 1.02 | 3.37E-01 | 6.05E-01 | 2396.90  | not significant |
| 9355 | OTUB1        | 1.02 | 3.61E-01 | 6.26E-01 | 3043.39  | not significant |
| 9356 | CDK5         | 1.02 | 3.76E-01 | 6.40E-01 | 1016.78  | not significant |
| 9357 | WRAP53       | 1.02 | 3.80E-01 | 6.44E-01 | 1094.47  | not significant |
| 9358 | ARL2         | 1.02 | 3.13E-01 | 5.84E-01 | 409.15   | not significant |
| 9359 | CLCN2        | 1.02 | 2.87E-01 | 5.58E-01 | 214.01   | not significant |
| 9360 | PKD1P1       | 1.02 | 3.04E-01 | 5.76E-01 | 249.91   | not significant |
| 9361 | PPP1R11      | 1.02 | 2.43E-01 | 5.11E-01 | 155.81   | not significant |
| 9362 | FAM19A2      | 1.02 | 2.30E-01 | 4.98E-01 | 152.27   | not significant |
| 9363 | RAB3D        | 1.02 | 9.56E-02 | NA       | 61.62    | not significant |
| 9364 | TVP23C       | 1.02 | 1.47E-01 | NA       | 92.64    | not significant |
| 9365 | HMGN1        | 1.02 | 2.93E-01 | 5.64E-01 | 11026.82 | not significant |
| 9366 | USF1         | 1.02 | 3.41E-01 | 6.08E-01 | 2741.21  | not significant |
| 9367 | COTL1        | 1.02 | 3.43E-01 | 6.10E-01 | 7897.23  | not significant |
| 9368 | DUSP11       | 1.02 | 3.78E-01 | 6.43E-01 | 915.12   | not significant |
| 9369 | RNF19A       | 1.02 | 3.68E-01 | 6.33E-01 | 1527.67  | not significant |
| 9370 | REEP3        | 1.02 | 3.74E-01 | 6.39E-01 | 1146.28  | not significant |
| 9371 | C2CD2L       | 1.02 | 3.78E-01 | 6.43E-01 | 1048.55  | not significant |
| 9372 | SLAMF1       | 1.02 | 3.53E-01 | 6.19E-01 | 429.79   | not significant |
| 9373 | TK2          | 1.02 | 3.13E-01 | 5.85E-01 | 273.39   | not significant |
| 9374 | TMEM238      | 1.02 | 2.93E-02 | NA       | 35.42    | not significant |
| 9375 | TEC          | 1.02 | 9.43E-02 | NA       | 62.31    | not significant |
| 9376 | C1orf112     | 1.02 | 3.74E-01 | 6.38E-01 | 1373.58  | not significant |
| 9377 | JAKMIP2      | 1.02 | 3.44E-01 | 6.10E-01 | 412.18   | not significant |
| 9378 | NUDT18       | 1.02 | 2.91E-01 | 5.62E-01 | 245.30   | not significant |
| 9379 | SPATA7       | 1.02 | 2.15E-01 | 4.81E-01 | 139.42   | not significant |
| 9380 | VSIG10       | 1.02 | 1.72E-01 | 4.26E-01 | 101.83   | not significant |
| 9381 | CLEC11A      | 1.02 | 4.06E-02 | NA       | 38.34    | not significant |
| 9382 | THOC7        | 1.02 | 3.60E-01 | 6.25E-01 | 2411.43  | not significant |
| 9383 | ACSL5        | 1.02 | 3.20E-01 | 5.90E-01 | 3613.74  | not significant |
| 9384 | SMCHD1       | 1.02 | 3.17E-01 | 5.87E-01 | 7698.36  | not significant |
| 9385 | KIAA1143     | 1.02 | 3.64E-01 | 6.29E-01 | 1861.79  | not significant |
| 9386 | PCED1B-AS1   | 1.02 | 3.13E-01 | 5.84E-01 | 317.24   | not significant |
| 9387 | VNN2         | 1.02 | 2.39E-01 | 5.07E-01 | 156.68   | not significant |
| 9388 | PDCC4-AS1    | 1.02 | 1.15E-01 | NA       | 75.56    | not significant |
| 9389 | IFI16        | 1.02 | 2.54E-01 | 5.23E-01 | 10351.03 | not significant |
| 9390 | HNRNPF       | 1.02 | 2.24E-01 | 4.91E-01 | 20652.23 | not significant |
| 9391 | FAM208A      | 1.02 | 3.17E-01 | 5.86E-01 | 4694.09  | not significant |
| 9392 | AGPAT6       | 1.02 | 3.37E-01 | 6.05E-01 | 3106.64  | not significant |
| 9393 | ADCY7        | 1.02 | 3.43E-01 | 6.10E-01 | 2855.91  | not significant |
| 9394 | HOXB3        | 1.02 | 6.98E-01 | 8.59E-01 | 884.52   | not significant |
| 9395 | FZD2         | 1.02 | 1.72E-01 | 4.26E-01 | 101.89   | not significant |
| 9396 | STK19        | 1.02 | 1.01E-01 | NA       | 65.56    | not significant |
| 9397 | GINS3        | 1.02 | 4.14E-01 | 6.71E-01 | 1415.06  | not significant |
| 9398 | DBI          | 1.02 | 3.27E-01 | 5.95E-01 | 4902.95  | not significant |
| 9399 | RPL30        | 1.02 | 3.37E-01 | 6.05E-01 | 19829.57 | not significant |
| 9400 | WBP1L        | 1.02 | 3.56E-01 | 6.21E-01 | 1754.24  | not significant |
| 9401 | PMF1         | 1.02 | 3.45E-01 | 6.12E-01 | 532.06   | not significant |
| 9402 | RPLP2        | 1.02 | 3.53E-01 | 6.19E-01 | 19998.72 | not significant |
| 9403 | LINC00883    | 1.02 | 2.23E-01 | 4.90E-01 | 151.06   | not significant |

|      |              |      |          |          |          |                 |
|------|--------------|------|----------|----------|----------|-----------------|
| 9404 | HLTF         | 1.02 | 3.12E-01 | 5.83E-01 | 3650.77  | not significant |
| 9405 | SLC5A3       | 1.02 | 3.61E-01 | 6.26E-01 | 4986.14  | not significant |
| 9406 | AZI2         | 1.02 | 3.30E-01 | 5.97E-01 | 2261.38  | not significant |
| 9407 | CYB5R1       | 1.02 | 3.44E-01 | 6.11E-01 | 430.35   | not significant |
| 9408 | CCR8         | 1.02 | 3.31E-01 | 5.99E-01 | 523.48   | not significant |
| 9409 | CA8          | 1.02 | 2.59E-01 | 5.28E-01 | 223.15   | not significant |
| 9410 | ZNF823       | 1.02 | 3.03E-01 | 5.75E-01 | 303.62   | not significant |
| 9411 | PCID2        | 1.02 | 3.26E-01 | 5.94E-01 | 3267.85  | not significant |
| 9412 | MRPS27       | 1.02 | 3.23E-01 | 5.93E-01 | 3283.50  | not significant |
| 9413 | YIF1B        | 1.02 | 3.53E-01 | 6.19E-01 | 1825.56  | not significant |
| 9414 | RAB28        | 1.02 | 3.66E-01 | 6.30E-01 | 960.54   | not significant |
| 9415 | C9orf91      | 1.02 | 3.66E-01 | 6.30E-01 | 1121.45  | not significant |
| 9416 | RPL18        | 1.02 | 4.58E-01 | 7.05E-01 | 17116.00 | not significant |
| 9417 | LAMTOR4      | 1.02 | 3.62E-01 | 6.26E-01 | 1058.31  | not significant |
| 9418 | CCDC120      | 1.02 | 1.13E-01 | NA       | 82.26    | not significant |
| 9419 | BIK          | 1.02 | 3.56E-01 | 6.22E-01 | 486.50   | not significant |
| 9420 | COQ7         | 1.02 | 2.73E-01 | 5.44E-01 | 526.18   | not significant |
| 9421 | DCBLD2       | 1.02 | 3.16E-01 | 5.86E-01 | 612.89   | not significant |
| 9422 | YAE1D1       | 1.02 | 2.91E-01 | 5.62E-01 | 265.92   | not significant |
| 9423 | NFKB1        | 1.02 | 3.12E-01 | 5.84E-01 | 3088.63  | not significant |
| 9424 | ZMIZ2        | 1.02 | 3.23E-01 | 5.93E-01 | 3043.97  | not significant |
| 9425 | DPM2         | 1.02 | 3.63E-01 | 6.27E-01 | 1162.68  | not significant |
| 9426 | TMEM135      | 1.02 | 3.63E-01 | 6.27E-01 | 1792.26  | not significant |
| 9427 | ZBTB4        | 1.02 | 3.69E-01 | 6.33E-01 | 1034.12  | not significant |
| 9428 | GPSM3        | 1.02 | 2.74E-01 | 5.45E-01 | 218.70   | not significant |
| 9429 | CLCC1        | 1.02 | 3.16E-01 | 5.86E-01 | 333.01   | not significant |
| 9430 | SEC22A       | 1.02 | 3.25E-01 | 5.94E-01 | 442.95   | not significant |
| 9431 | CHST7        | 1.02 | 2.80E-01 | 5.51E-01 | 228.17   | not significant |
| 9432 | SLC29A4      | 1.02 | 1.51E-01 | NA       | 100.20   | not significant |
| 9433 | TMEM50A      | 1.02 | 3.02E-01 | 5.72E-01 | 3580.65  | not significant |
| 9434 | ATP6V1G1     | 1.02 | 3.16E-01 | 5.86E-01 | 2363.88  | not significant |
| 9435 | SLC9A8       | 1.02 | 3.62E-01 | 6.26E-01 | 960.10   | not significant |
| 9436 | TUBGCP5      | 1.02 | 3.60E-01 | 6.25E-01 | 741.41   | not significant |
| 9437 | FAT1         | 1.02 | 2.90E-01 | 5.61E-01 | 5956.57  | not significant |
| 9438 | ATP5SL       | 1.02 | 2.45E-01 | 5.12E-01 | 180.03   | not significant |
| 9439 | DDX54        | 1.02 | 2.50E-01 | 5.18E-01 | 6486.67  | not significant |
| 9440 | CD8A         | 1.02 | 2.96E-01 | 5.67E-01 | 3779.47  | not significant |
| 9441 | ZFAND6       | 1.02 | 3.64E-01 | 6.28E-01 | 1127.28  | not significant |
| 9442 | ELF4         | 1.02 | 3.47E-01 | 6.14E-01 | 1786.79  | not significant |
| 9443 | RPS28        | 1.02 | 3.60E-01 | 6.25E-01 | 9175.87  | not significant |
| 9444 | TRIM52       | 1.02 | 3.22E-01 | 5.92E-01 | 365.64   | not significant |
| 9445 | SYT11        | 1.02 | 1.83E-01 | 4.41E-01 | 120.05   | not significant |
| 9446 | GANC         | 1.02 | 3.07E-01 | 5.78E-01 | 304.59   | not significant |
| 9447 | LYRM5        | 1.02 | 2.55E-01 | 5.24E-01 | 220.55   | not significant |
| 9448 | ZNF726       | 1.02 | 2.44E-01 | 5.12E-01 | 185.13   | not significant |
| 9449 | INTS6-AS1    | 1.02 | 9.49E-03 | NA       | 24.84    | not significant |
| 9450 | ARF6         | 1.02 | 2.51E-01 | 5.19E-01 | 6645.47  | not significant |
| 9451 | TSR3         | 1.02 | 3.58E-01 | 6.23E-01 | 1294.05  | not significant |
| 9452 | MEF2D        | 1.02 | 3.52E-01 | 6.19E-01 | 1612.08  | not significant |
| 9453 | RPS27        | 1.02 | 4.51E-01 | 7.00E-01 | 11531.12 | not significant |
| 9454 | EZH2         | 1.02 | 2.50E-01 | 5.19E-01 | 6487.23  | not significant |
| 9455 | WARS2        | 1.02 | 3.45E-01 | 6.12E-01 | 727.38   | not significant |
| 9456 | GAB1         | 1.02 | 4.86E-02 | NA       | 49.47    | not significant |
| 9457 | RBM39        | 1.02 | 2.27E-01 | 4.95E-01 | 13539.44 | not significant |
| 9458 | FOXP4        | 1.02 | 3.26E-01 | 5.94E-01 | 2866.06  | not significant |
| 9459 | TRIM68       | 1.02 | 3.53E-01 | 6.19E-01 | 614.55   | not significant |
| 9460 | ZNF251       | 1.02 | 3.23E-01 | 5.93E-01 | 470.56   | not significant |
| 9461 | TGIF1        | 1.02 | 2.87E-01 | 5.58E-01 | 263.57   | not significant |
| 9462 | AGAP6        | 1.02 | 1.16E-01 | NA       | 83.62    | not significant |
| 9463 | MRPS16       | 1.02 | 3.02E-01 | 5.72E-01 | 4104.14  | not significant |
| 9464 | NUF2         | 1.02 | 3.40E-01 | 6.08E-01 | 1930.97  | not significant |
| 9465 | PAK1         | 1.02 | 3.23E-01 | 5.92E-01 | 2276.74  | not significant |
| 9466 | LOC101928378 | 1.02 | 2.04E-01 | 4.69E-01 | 208.47   | not significant |
| 9467 | RPN2         | 1.02 | 2.27E-01 | 4.95E-01 | 17732.82 | not significant |
| 9468 | LAMP2        | 1.02 | 3.15E-01 | 5.86E-01 | 3594.15  | not significant |
| 9469 | RBMX2        | 1.02 | 3.39E-01 | 6.07E-01 | 1219.96  | not significant |
| 9470 | RRM2B        | 1.02 | 3.49E-01 | 6.16E-01 | 780.92   | not significant |
| 9471 | TMEM42       | 1.02 | 2.28E-01 | 4.95E-01 | 185.15   | not significant |
| 9472 | CCDC94       | 1.02 | 3.50E-01 | 6.17E-01 | 1002.21  | not significant |
| 9473 | C14orf80     | 1.02 | 2.70E-01 | 5.40E-01 | 241.05   | not significant |
| 9474 | PRPF4B       | 1.02 | 2.88E-01 | 5.59E-01 | 5981.98  | not significant |
| 9475 | PDE6D        | 1.02 | 3.47E-01 | 6.14E-01 | 1302.48  | not significant |
| 9476 | CNPY2        | 1.02 | 3.18E-01 | 5.88E-01 | 2612.19  | not significant |
| 9477 | CD81         | 1.02 | 3.06E-01 | 5.78E-01 | 4662.94  | not significant |
| 9478 | CCDC167      | 1.02 | 3.49E-01 | 6.16E-01 | 1438.05  | not significant |
| 9479 | UBE3B        | 1.02 | 3.83E-01 | 6.46E-01 | 1666.82  | not significant |
| 9480 | TEX19        | 1.02 | 3.31E-01 | 5.99E-01 | 934.44   | not significant |
| 9481 | TICRR        | 1.02 | 3.46E-01 | 6.12E-01 | 1883.83  | not significant |
| 9482 | CENPQ        | 1.02 | 2.72E-01 | 5.42E-01 | 782.21   | not significant |
| 9483 | CHAMP1       | 1.02 | 1.63E-01 | 4.14E-01 | 104.46   | not significant |
| 9484 | RPL34        | 1.02 | 3.30E-01 | 5.97E-01 | 6634.45  | not significant |
| 9485 | ULK1         | 1.02 | 2.94E-01 | 5.65E-01 | 3602.90  | not significant |
| 9486 | CDC37L1      | 1.02 | 2.47E-01 | 5.15E-01 | 212.72   | not significant |
| 9487 | DBNL         | 1.02 | 2.89E-01 | 5.61E-01 | 7142.76  | not significant |
| 9488 | RAB2A        | 1.02 | 3.08E-01 | 5.79E-01 | 2269.76  | not significant |
| 9489 | RIN3         | 1.02 | 2.95E-01 | 5.66E-01 | 2407.31  | not significant |
| 9490 | CIT          | 1.02 | 3.14E-01 | 5.85E-01 | 4031.28  | not significant |
| 9491 | ZNF580       | 1.02 | 3.25E-01 | 5.93E-01 | 494.94   | not significant |

|      |              |      |          |          |          |                 |
|------|--------------|------|----------|----------|----------|-----------------|
| 9492 | EFCAB2       | 1.02 | 3.23E-01 | 5.93E-01 | 488.38   | not significant |
| 9493 | RPSA         | 1.02 | 3.38E-01 | 6.06E-01 | 21963.84 | not significant |
| 9494 | SLC16A5      | 1.02 | 1.19E-01 | NA       | 82.84    | not significant |
| 9495 | H1FX-AS1     | 1.02 | 3.84E-02 | NA       | 43.29    | not significant |
| 9496 | CPSF4        | 1.02 | 3.06E-01 | 5.78E-01 | 2176.06  | not significant |
| 9497 | BLCAP        | 1.02 | 3.30E-01 | 5.98E-01 | 1751.47  | not significant |
| 9498 | RAB27A       | 1.02 | 3.22E-01 | 5.92E-01 | 1377.91  | not significant |
| 9499 | PIK3R5       | 1.02 | 3.45E-01 | 6.12E-01 | 1413.12  | not significant |
| 9500 | POLR3C       | 1.02 | 3.09E-01 | 5.80E-01 | 586.76   | not significant |
| 9501 | RMND1        | 1.02 | 3.18E-01 | 5.87E-01 | 417.85   | not significant |
| 9502 | OXLD1        | 1.02 | 2.99E-01 | 5.70E-01 | 329.58   | not significant |
| 9503 | GUSBP9       | 1.02 | 1.18E-02 | NA       | 31.23    | not significant |
| 9504 | IDNK         | 1.02 | 3.54E-02 | NA       | 41.88    | not significant |
| 9505 | UBE4B        | 1.02 | 3.17E-01 | 5.87E-01 | 2631.55  | not significant |
| 9506 | STX5         | 1.02 | 3.38E-01 | 6.06E-01 | 939.59   | not significant |
| 9507 | MTERF4       | 1.02 | 3.43E-01 | 6.10E-01 | 1062.22  | not significant |
| 9508 | C19orf25     | 1.02 | 3.41E-01 | 6.08E-01 | 871.40   | not significant |
| 9509 | SMIM3        | 1.02 | 3.52E-01 | 6.19E-01 | 531.20   | not significant |
| 9510 | MFSD11       | 1.02 | 3.56E-01 | 6.22E-01 | 1053.20  | not significant |
| 9511 | CCDC22       | 1.02 | 2.96E-01 | 5.67E-01 | 358.28   | not significant |
| 9512 | LINC00669    | 1.02 | 9.31E-02 | NA       | 69.90    | not significant |
| 9513 | LOC100289092 | 1.02 | 1.18E-01 | NA       | 89.89    | not significant |
| 9514 | PLD2         | 1.02 | 4.55E-02 | NA       | 47.91    | not significant |
| 9515 | MRPL16       | 1.02 | 2.93E-01 | 5.65E-01 | 2536.42  | not significant |
| 9516 | BDH1         | 1.02 | 3.41E-01 | 6.08E-01 | 1168.73  | not significant |
| 9517 | PTAR1        | 1.02 | 3.79E-01 | 6.44E-01 | 2222.52  | not significant |
| 9518 | BCKDK        | 1.02 | 3.41E-01 | 6.08E-01 | 1002.53  | not significant |
| 9519 | RPS10        | 1.02 | 2.06E-01 | 4.71E-01 | 181.02   | not significant |
| 9520 | CMTM6        | 1.02 | 2.35E-01 | 5.02E-01 | 8507.72  | not significant |
| 9521 | CSTB         | 1.02 | 3.80E-01 | 6.44E-01 | 2138.86  | not significant |
| 9522 | HGS          | 1.02 | 2.78E-01 | 5.48E-01 | 3708.40  | not significant |
| 9523 | PKD1         | 1.02 | 3.42E-01 | 6.09E-01 | 1062.21  | not significant |
| 9524 | LOC150776    | 1.02 | 3.27E-01 | 5.95E-01 | 539.43   | not significant |
| 9525 | UNK          | 1.02 | 2.88E-01 | 5.59E-01 | 3454.02  | not significant |
| 9526 | ADAM10       | 1.02 | 2.92E-01 | 5.63E-01 | 4425.35  | not significant |
| 9527 | TMEM206      | 1.02 | 3.32E-01 | 6.00E-01 | 1500.87  | not significant |
| 9528 | WRN          | 1.02 | 3.16E-01 | 5.86E-01 | 2115.68  | not significant |
| 9529 | E1F1B        | 1.02 | 3.21E-01 | 5.91E-01 | 1391.99  | not significant |
| 9530 | TTF1         | 1.02 | 3.15E-01 | 5.86E-01 | 2051.18  | not significant |
| 9531 | WDR37        | 1.02 | 3.37E-01 | 6.05E-01 | 987.74   | not significant |
| 9532 | LINC00152    | 1.02 | 2.42E-01 | 5.10E-01 | 213.47   | not significant |
| 9533 | ZNF57        | 1.02 | 2.50E-01 | 5.18E-01 | 229.13   | not significant |
| 9534 | C6orf57      | 1.02 | 2.00E-01 | 4.64E-01 | 161.98   | not significant |
| 9535 | AIM1         | 1.02 | 3.53E-01 | 6.19E-01 | 4112.86  | not significant |
| 9536 | TBC1D10C     | 1.02 | 2.95E-01 | 5.66E-01 | 3805.97  | not significant |
| 9537 | SLCC4A1      | 1.02 | 2.94E-01 | 5.65E-01 | 2278.06  | not significant |
| 9538 | MDM1         | 1.02 | 3.29E-01 | 5.96E-01 | 1601.95  | not significant |
| 9539 | WWOX         | 1.02 | 3.57E-01 | 6.23E-01 | 582.82   | not significant |
| 9540 | ATG2B        | 1.02 | 3.39E-01 | 6.07E-01 | 1723.11  | not significant |
| 9541 | RPSAP58      | 1.02 | 2.89E-01 | 5.61E-01 | 376.95   | not significant |
| 9542 | STAG3L4      | 1.02 | 2.50E-01 | 5.18E-01 | 241.79   | not significant |
| 9543 | CSAD         | 1.02 | 1.88E-01 | 4.47E-01 | 143.55   | not significant |
| 9544 | HDFGRP2      | 1.02 | 2.98E-01 | 5.69E-01 | 2821.75  | not significant |
| 9545 | SEC61B       | 1.02 | 3.22E-01 | 5.92E-01 | 2713.21  | not significant |
| 9546 | DYM          | 1.02 | 3.11E-01 | 5.83E-01 | 1944.90  | not significant |
| 9547 | JMJD4        | 1.02 | 3.35E-01 | 6.04E-01 | 831.73   | not significant |
| 9548 | KIAA1958     | 1.02 | 3.25E-01 | 5.94E-01 | 626.33   | not significant |
| 9549 | RELL1        | 1.02 | 2.99E-01 | 5.70E-01 | 412.77   | not significant |
| 9550 | C11orf80     | 1.02 | 3.06E-01 | 5.78E-01 | 470.19   | not significant |
| 9551 | ITPR3        | 1.02 | 3.06E-01 | 5.78E-01 | 4757.99  | not significant |
| 9552 | UBL7-AS1     | 1.02 | 2.11E-01 | 4.75E-01 | 183.37   | not significant |
| 9553 | FAM134B      | 1.02 | 3.27E-01 | 5.95E-01 | 1408.28  | not significant |
| 9554 | DCUN1D1      | 1.02 | 3.24E-01 | 5.93E-01 | 1468.99  | not significant |
| 9555 | ELOVL4       | 1.02 | 3.33E-01 | 6.01E-01 | 1184.85  | not significant |
| 9556 | RPL28        | 1.02 | 3.42E-01 | 6.09E-01 | 14747.30 | not significant |
| 9557 | SOC56        | 1.02 | 2.48E-01 | 5.16E-01 | 234.20   | not significant |
| 9558 | RPS23        | 1.02 | 3.16E-01 | 5.86E-01 | 10649.91 | not significant |
| 9559 | LYRM1        | 1.02 | 3.28E-01 | 5.96E-01 | 705.85   | not significant |
| 9560 | TESK1        | 1.02 | 3.32E-01 | 6.00E-01 | 1069.08  | not significant |
| 9561 | TMEM170A     | 1.02 | 3.35E-01 | 6.04E-01 | 539.67   | not significant |
| 9562 | ERVK13-1     | 1.02 | 2.57E-01 | 5.26E-01 | 252.76   | not significant |
| 9563 | SNAP47       | 1.02 | 3.23E-01 | 5.93E-01 | 813.37   | not significant |
| 9564 | PARP3        | 1.02 | 3.21E-01 | 5.91E-01 | 742.95   | not significant |
| 9565 | CXXC5        | 1.02 | 3.23E-01 | 5.92E-01 | 727.64   | not significant |
| 9566 | RPS12        | 1.02 | 3.02E-01 | 5.73E-01 | 22374.60 | not significant |
| 9567 | SLC35B3      | 1.02 | 2.80E-01 | 5.51E-01 | 330.18   | not significant |
| 9568 | ZBED3        | 1.02 | 2.54E-01 | 5.23E-01 | 288.58   | not significant |
| 9569 | UHRF1        | 1.02 | 2.24E-01 | 4.92E-01 | 9858.67  | not significant |
| 9570 | ANAPC16      | 1.02 | 3.19E-01 | 5.88E-01 | 2738.96  | not significant |
| 9571 | AP4B1        | 1.02 | 3.26E-01 | 5.94E-01 | 914.40   | not significant |
| 9572 | NCBP2-AS2    | 1.02 | 3.18E-01 | 5.87E-01 | 788.11   | not significant |
| 9573 | AMN1         | 1.02 | 2.35E-01 | 5.02E-01 | 232.02   | not significant |
| 9574 | MCTS1        | 1.02 | 3.12E-01 | 5.83E-01 | 1772.96  | not significant |
| 9575 | ZFP36        | 1.02 | 3.70E-01 | 6.35E-01 | 588.15   | not significant |
| 9576 | HRAS         | 1.02 | 3.29E-01 | 5.96E-01 | 766.70   | not significant |
| 9577 | CDK7         | 1.02 | 3.82E-01 | 6.46E-01 | 473.71   | not significant |
| 9578 | C19orf57     | 1.02 | 2.70E-01 | 5.41E-01 | 288.70   | not significant |
| 9579 | TSPAN13      | 1.02 | 2.76E-01 | 5.47E-01 | 299.43   | not significant |



|      |              |      |          |          |          |                 |
|------|--------------|------|----------|----------|----------|-----------------|
| 9580 | CDC25C       | 1.02 | 2.74E-01 | 5.44E-01 | 310.68   | not significant |
| 9581 | TTC32        | 1.02 | 1.49E-01 | 3.96E-01 | 176.79   | not significant |
| 9582 | USP48        | 1.02 | 3.00E-01 | 5.70E-01 | 2705.73  | not significant |
| 9583 | FAM117A      | 1.02 | 3.08E-01 | 5.79E-01 | 1462.25  | not significant |
| 9584 | ZNRF1        | 1.02 | 2.39E-01 | 5.08E-01 | 5163.53  | not significant |
| 9585 | TOR1A        | 1.02 | 2.73E-01 | 5.43E-01 | 2674.33  | not significant |
| 9586 | WDSUB1       | 1.02 | 2.63E-01 | 5.33E-01 | 280.02   | not significant |
| 9587 | EFHC1        | 1.02 | 2.27E-01 | 4.95E-01 | 220.53   | not significant |
| 9588 | RPLP1        | 1.02 | 2.43E-01 | 5.11E-01 | 21163.56 | not significant |
| 9589 | GNB2L1       | 1.02 | 2.33E-01 | 5.00E-01 | 25345.18 | not significant |
| 9590 | MEAF6        | 1.02 | 2.79E-01 | 5.50E-01 | 2714.95  | not significant |
| 9591 | GBP1         | 1.02 | 2.97E-01 | 5.68E-01 | 1936.80  | not significant |
| 9592 | CRBN         | 1.02 | 3.22E-01 | 5.91E-01 | 1167.80  | not significant |
| 9593 | ZNF83        | 1.02 | 3.23E-01 | 5.93E-01 | 970.23   | not significant |
| 9594 | RNASL        | 1.02 | 2.82E-01 | 5.53E-01 | 350.37   | not significant |
| 9595 | PSIP1        | 1.02 | 2.26E-01 | 4.94E-01 | 7911.30  | not significant |
| 9596 | NMD3         | 1.02 | 2.77E-01 | 5.47E-01 | 2233.55  | not significant |
| 9597 | TMEM194A     | 1.02 | 2.82E-01 | 5.53E-01 | 7509.20  | not significant |
| 9598 | ULK3         | 1.02 | 3.11E-01 | 5.82E-01 | 1574.38  | not significant |
| 9599 | ZNF394       | 1.02 | 3.29E-01 | 5.96E-01 | 626.68   | not significant |
| 9600 | SMARCB1      | 1.02 | 3.45E-01 | 6.11E-01 | 3333.75  | not significant |
| 9601 | CLNS1A       | 1.02 | 2.81E-01 | 5.51E-01 | 3950.78  | not significant |
| 9602 | RSRC2        | 1.02 | 2.67E-01 | 5.38E-01 | 4018.35  | not significant |
| 9603 | CHMP2B       | 1.02 | 3.08E-01 | 5.80E-01 | 1708.66  | not significant |
| 9604 | SYNJ2        | 1.02 | 2.88E-01 | 5.59E-01 | 3357.49  | not significant |
| 9605 | BAZ2B        | 1.02 | 3.10E-01 | 5.82E-01 | 756.13   | not significant |
| 9606 | KIAA1549     | 1.02 | 2.31E-01 | 4.99E-01 | 223.72   | not significant |
| 9607 | ADAT3        | 1.02 | 1.86E-01 | 4.44E-01 | 161.09   | not significant |
| 9608 | PPIB         | 1.02 | 1.78E-01 | 4.34E-01 | 10170.96 | not significant |
| 9609 | NUMA1        | 1.02 | 2.30E-01 | 4.98E-01 | 9066.75  | not significant |
| 9610 | ARGLU1       | 1.02 | 2.97E-01 | 5.67E-01 | 4440.61  | not significant |
| 9611 | TTC33        | 1.02 | 3.16E-01 | 5.86E-01 | 935.22   | not significant |
| 9612 | LINC01521    | 1.02 | 2.92E-01 | 5.63E-01 | 425.40   | not significant |
| 9613 | SLC29A2      | 1.02 | 7.27E-02 | NA       | 74.09    | not significant |
| 9614 | MRPL15       | 1.02 | 2.83E-01 | 5.54E-01 | 2615.38  | not significant |
| 9615 | WDR34        | 1.02 | 2.99E-01 | 5.70E-01 | 2502.08  | not significant |
| 9616 | IBTK         | 1.02 | 2.72E-01 | 5.43E-01 | 3024.03  | not significant |
| 9617 | TMUB1        | 1.02 | 3.10E-01 | 5.81E-01 | 2069.32  | not significant |
| 9618 | NAGK         | 1.02 | 3.08E-01 | 5.80E-01 | 812.43   | not significant |
| 9619 | TSNARE1      | 1.02 | 2.45E-01 | 5.13E-01 | 255.20   | not significant |
| 9620 | PYROXD2      | 1.02 | 1.52E-01 | 3.99E-01 | 121.67   | not significant |
| 9621 | P2RX7        | 1.02 | 2.62E-01 | 5.31E-01 | 290.98   | not significant |
| 9622 | ST20         | 1.02 | 2.27E-01 | 4.95E-01 | 206.80   | not significant |
| 9623 | MCM6         | 1.02 | 1.67E-01 | 4.20E-01 | 16942.98 | not significant |
| 9624 | RPS4X        | 1.02 | 2.63E-01 | 5.33E-01 | 22338.07 | not significant |
| 9625 | SYPL1        | 1.02 | 2.16E-01 | 4.82E-01 | 7455.47  | not significant |
| 9626 | GANAB        | 1.02 | 2.21E-01 | 4.87E-01 | 13850.92 | not significant |
| 9627 | C16orf62     | 1.02 | 2.89E-01 | 5.60E-01 | 1959.85  | not significant |
| 9628 | DENND6A      | 1.02 | 2.85E-01 | 5.56E-01 | 1395.64  | not significant |
| 9629 | TSPAN5       | 1.02 | 2.88E-01 | 5.59E-01 | 1481.78  | not significant |
| 9630 | FAM73B       | 1.02 | 3.18E-01 | 5.87E-01 | 1104.49  | not significant |
| 9631 | ANKRD13B     | 1.02 | 3.14E-01 | 5.85E-01 | 913.43   | not significant |
| 9632 | RBM43        | 1.02 | 2.34E-01 | 5.01E-01 | 240.14   | not significant |
| 9633 | C20orf96     | 1.02 | 4.01E-01 | 6.60E-01 | 445.99   | not significant |
| 9634 | DPY19L4      | 1.02 | 3.15E-01 | 5.86E-01 | 1244.80  | not significant |
| 9635 | HSH2D        | 1.02 | 1.67E-01 | 4.19E-01 | 140.84   | not significant |
| 9636 | POLRMT       | 1.02 | 2.86E-01 | 5.57E-01 | 2719.41  | not significant |
| 9637 | RASA3        | 1.02 | 2.99E-01 | 5.70E-01 | 1788.75  | not significant |
| 9638 | CASP1        | 1.02 | 3.06E-01 | 5.78E-01 | 679.77   | not significant |
| 9639 | ZBTB14       | 1.02 | 3.10E-01 | 5.81E-01 | 1138.03  | not significant |
| 9640 | MYO19        | 1.02 | 3.16E-01 | 5.86E-01 | 1003.69  | not significant |
| 9641 | EPIM2A       | 1.02 | 3.27E-01 | 5.95E-01 | 661.32   | not significant |
| 9642 | TSSK6        | 1.02 | 2.11E-01 | 4.75E-01 | 198.95   | not significant |
| 9643 | RRBP1        | 1.02 | 3.09E-01 | 5.80E-01 | 1194.98  | not significant |
| 9644 | NLK          | 1.02 | 2.84E-01 | 5.54E-01 | 1468.41  | not significant |
| 9645 | CDKN2A       | 1.02 | 3.12E-01 | 5.83E-01 | 725.12   | not significant |
| 9646 | LMO4         | 1.02 | 2.17E-01 | 4.83E-01 | 223.78   | not significant |
| 9647 | XKR5         | 1.02 | 3.08E-02 | NA       | 47.27    | not significant |
| 9648 | CEP57L1      | 1.02 | 3.04E-01 | 5.76E-01 | 817.62   | not significant |
| 9649 | NBR2         | 1.02 | 3.71E-02 | NA       | 49.62    | not significant |
| 9650 | LOC100506159 | 1.02 | 4.47E-02 | NA       | 55.25    | not significant |
| 9651 | HP1BP3       | 1.02 | 2.17E-01 | 4.83E-01 | 9999.39  | not significant |
| 9652 | ARHGEF1      | 1.02 | 2.64E-01 | 5.35E-01 | 3625.71  | not significant |
| 9653 | DSCC1        | 1.02 | 2.96E-01 | 5.67E-01 | 1998.04  | not significant |
| 9654 | SPCS1        | 1.02 | 2.93E-01 | 5.64E-01 | 3711.18  | not significant |
| 9655 | PLEKHG4      | 1.02 | 2.61E-01 | 5.31E-01 | 4136.77  | not significant |
| 9656 | FBXO34       | 1.02 | 3.04E-01 | 5.76E-01 | 1219.20  | not significant |
| 9657 | ALG10        | 1.02 | 2.82E-01 | 5.53E-01 | 455.84   | not significant |
| 9658 | PTPLA        | 1.02 | 2.07E-01 | 4.71E-01 | 192.69   | not significant |
| 9659 | FBXL6        | 1.02 | 2.22E-01 | 4.89E-01 | 208.44   | not significant |
| 9660 | C11orf71     | 1.02 | 1.77E-01 | 4.33E-01 | 154.60   | not significant |
| 9661 | GEMIN8       | 1.02 | 4.70E-01 | 7.14E-01 | 520.70   | not significant |
| 9662 | DOT1L        | 1.02 | 2.33E-01 | 5.00E-01 | 5205.85  | not significant |
| 9663 | AP5S1        | 1.02 | 3.09E-01 | 5.80E-01 | 773.23   | not significant |
| 9664 | CNTLN        | 1.02 | 3.07E-01 | 5.78E-01 | 862.94   | not significant |
| 9665 | TMEM115      | 1.02 | 2.96E-01 | 5.66E-01 | 924.59   | not significant |
| 9666 | CTAGE5       | 1.02 | 3.05E-01 | 5.77E-01 | 971.71   | not significant |
| 9667 | LINC00339    | 1.02 | 2.18E-01 | 4.85E-01 | 164.51   | not significant |

|      |              |      |          |          |          |                 |
|------|--------------|------|----------|----------|----------|-----------------|
| 9668 | KDM3A        | 1.02 | 2.48E-01 | 5.16E-01 | 3567.52  | not significant |
| 9669 | TRPV2        | 1.02 | 2.96E-01 | 5.66E-01 | 1653.53  | not significant |
| 9670 | SPRED2       | 1.02 | 3.05E-01 | 5.77E-01 | 1389.93  | not significant |
| 9671 | SCYL3        | 1.02 | 2.80E-01 | 5.51E-01 | 454.05   | not significant |
| 9672 | PEX12        | 1.02 | 2.55E-01 | 5.24E-01 | 312.95   | not significant |
| 9673 | CD59         | 1.02 | 2.99E-01 | 5.70E-01 | 1518.46  | not significant |
| 9674 | CC2D1A       | 1.02 | 2.92E-01 | 5.64E-01 | 1669.40  | not significant |
| 9675 | PEX1         | 1.02 | 2.95E-01 | 5.66E-01 | 1474.49  | not significant |
| 9676 | PSMG4        | 1.02 | 2.95E-01 | 5.66E-01 | 618.40   | not significant |
| 9677 | ZCCHC6       | 1.02 | 3.01E-01 | 5.72E-01 | 1022.45  | not significant |
| 9678 | RRN3P1       | 1.02 | 2.64E-01 | 5.34E-01 | 331.55   | not significant |
| 9679 | TLL3         | 1.02 | 1.43E-01 | 3.85E-01 | 125.70   | not significant |
| 9680 | EML6         | 1.02 | 1.87E-01 | 4.45E-01 | 268.32   | not significant |
| 9681 | RALY         | 1.02 | 2.31E-01 | 4.99E-01 | 17343.27 | not significant |
| 9682 | OSTM1        | 1.02 | 2.84E-01 | 5.54E-01 | 1764.40  | not significant |
| 9683 | FAM78A       | 1.02 | 2.76E-01 | 5.47E-01 | 1396.01  | not significant |
| 9684 | MRPS21       | 1.02 | 2.19E-01 | 4.86E-01 | 214.52   | not significant |
| 9685 | CCDC106      | 1.02 | 2.27E-01 | 4.95E-01 | 254.52   | not significant |
| 9686 | ENDOG        | 1.02 | 2.09E-01 | 4.74E-01 | 237.43   | not significant |
| 9687 | RTEL1        | 1.02 | 6.92E-02 | NA       | 68.73    | not significant |
| 9688 | LINC00526    | 1.02 | 6.80E-02 | NA       | 71.21    | not significant |
| 9689 | MCM3         | 1.02 | 1.57E-01 | 4.05E-01 | 23496.15 | not significant |
| 9690 | UBAC2        | 1.02 | 2.59E-01 | 5.28E-01 | 2970.63  | not significant |
| 9691 | SEC63        | 1.02 | 2.64E-01 | 5.34E-01 | 4661.16  | not significant |
| 9692 | PTK7         | 1.02 | 2.98E-01 | 5.69E-01 | 1821.45  | not significant |
| 9693 | KAT7         | 1.02 | 2.77E-01 | 5.47E-01 | 2100.15  | not significant |
| 9694 | NUTM2A-AS1   | 1.02 | 2.98E-01 | 5.68E-01 | 659.16   | not significant |
| 9695 | ASF1B        | 1.02 | 2.29E-01 | 4.97E-01 | 4894.34  | not significant |
| 9696 | RPL14        | 1.02 | 2.32E-01 | 4.99E-01 | 12843.43 | not significant |
| 9697 | STAG2        | 1.02 | 2.05E-01 | 4.70E-01 | 10686.19 | not significant |
| 9698 | C7orf60      | 1.02 | 2.94E-01 | 5.65E-01 | 779.17   | not significant |
| 9699 | RAD51D       | 1.02 | 3.01E-01 | 5.72E-01 | 829.61   | not significant |
| 9700 | DENND3       | 1.02 | 2.94E-01 | 5.66E-01 | 652.01   | not significant |
| 9701 | HEXIM2       | 1.02 | 1.65E-01 | 4.17E-01 | 150.47   | not significant |
| 9702 | PSMB1        | 1.02 | 2.82E-01 | 5.52E-01 | 4833.61  | not significant |
| 9703 | PGM1         | 1.02 | 2.49E-01 | 5.17E-01 | 2466.90  | not significant |
| 9704 | NOS3         | 1.02 | 1.83E-01 | 4.40E-01 | 183.34   | not significant |
| 9705 | FEN1         | 1.02 | 2.34E-01 | 5.01E-01 | 7769.59  | not significant |
| 9706 | PHACTR3      | 1.02 | 2.99E-01 | 5.69E-01 | 1904.46  | not significant |
| 9707 | BRIP1        | 1.02 | 2.49E-01 | 5.17E-01 | 3623.89  | not significant |
| 9708 | TAOK2        | 1.02 | 2.69E-01 | 5.40E-01 | 3112.97  | not significant |
| 9709 | GALNT7       | 1.02 | 2.78E-01 | 5.48E-01 | 2578.19  | not significant |
| 9710 | APBA2        | 1.02 | 2.98E-01 | 5.68E-01 | 1149.31  | not significant |
| 9711 | MVP          | 1.02 | 2.78E-01 | 5.48E-01 | 471.15   | not significant |
| 9712 | ZNF606       | 1.02 | 2.65E-01 | 5.35E-01 | 355.12   | not significant |
| 9713 | MICALL2      | 1.02 | 1.09E-01 | 3.26E-01 | 102.44   | not significant |
| 9714 | HDAC11       | 1.02 | 9.43E-02 | NA       | 93.25    | not significant |
| 9715 | NPHP3        | 1.02 | 7.69E-02 | NA       | 79.20    | not significant |
| 9716 | ITPKB        | 1.02 | 2.87E-01 | 5.58E-01 | 925.48   | not significant |
| 9717 | IGFBP6       | 1.02 | 1.75E-01 | 4.31E-01 | 173.53   | not significant |
| 9718 | LINC01115    | 1.02 | 7.36E-02 | NA       | 75.67    | not significant |
| 9719 | ASB9         | 1.02 | 2.79E-01 | 5.49E-01 | 495.76   | not significant |
| 9720 | IFI35        | 1.02 | 2.47E-01 | 5.15E-01 | 361.36   | not significant |
| 9721 | EEF1G        | 1.02 | 2.21E-01 | 4.88E-01 | 12406.60 | not significant |
| 9722 | MAD1L1       | 1.02 | 2.79E-01 | 5.50E-01 | 1755.90  | not significant |
| 9723 | VWFC3        | 1.02 | 2.91E-01 | 5.62E-01 | 1335.25  | not significant |
| 9724 | GBAP1        | 1.02 | 9.70E-02 | NA       | 87.39    | not significant |
| 9725 | ESYT2        | 1.02 | 2.42E-01 | 5.11E-01 | 12067.82 | not significant |
| 9726 | TMED3        | 1.02 | 2.83E-01 | 5.53E-01 | 1507.41  | not significant |
| 9727 | TRIB3        | 1.02 | 2.83E-01 | 5.53E-01 | 1588.56  | not significant |
| 9728 | ACVR1        | 1.02 | 2.27E-01 | 4.95E-01 | 274.59   | not significant |
| 9729 | DPH6         | 1.02 | 1.85E-01 | 4.44E-01 | 179.09   | not significant |
| 9730 | ERO1LB       | 1.02 | 1.60E-01 | 4.10E-01 | 145.26   | not significant |
| 9731 | TAB1         | 1.02 | 2.94E-01 | 5.65E-01 | 1129.93  | not significant |
| 9732 | MRPL52       | 1.02 | 2.92E-01 | 5.63E-01 | 1534.40  | not significant |
| 9733 | SLC16A13     | 1.02 | 4.85E-01 | 7.26E-01 | 103.07   | not significant |
| 9734 | LOC642852    | 1.02 | 2.27E-01 | 4.95E-01 | 310.50   | not significant |
| 9735 | SMAD4        | 1.02 | 2.45E-01 | 5.13E-01 | 2766.10  | not significant |
| 9736 | CCM2         | 1.02 | 2.65E-01 | 5.36E-01 | 2483.34  | not significant |
| 9737 | GDAP1        | 1.02 | 2.89E-01 | 5.60E-01 | 946.75   | not significant |
| 9738 | SLC37A3      | 1.02 | 2.76E-01 | 5.46E-01 | 1796.31  | not significant |
| 9739 | VKORC1       | 1.02 | 2.85E-01 | 5.56E-01 | 1390.13  | not significant |
| 9740 | METTL25      | 1.02 | 2.55E-01 | 5.23E-01 | 355.87   | not significant |
| 9741 | BTG2         | 1.02 | 2.26E-01 | 4.94E-01 | 271.78   | not significant |
| 9742 | SEC22B       | 1.02 | 2.70E-01 | 5.41E-01 | 476.12   | not significant |
| 9743 | TOR3A        | 1.02 | 2.37E-01 | 5.05E-01 | 2925.37  | not significant |
| 9744 | PTPN18       | 1.02 | 2.85E-01 | 5.55E-01 | 1344.65  | not significant |
| 9745 | ZNF230       | 1.02 | 2.47E-01 | 5.15E-01 | 314.01   | not significant |
| 9746 | RRAGB        | 1.02 | 1.81E-01 | 4.39E-01 | 167.58   | not significant |
| 9747 | ASL          | 1.02 | 1.13E-01 | 3.32E-01 | 113.09   | not significant |
| 9748 | ZNF704       | 1.02 | 7.92E-02 | NA       | 88.92    | not significant |
| 9749 | LOC102723927 | 1.02 | 2.12E-02 | NA       | 52.59    | not significant |
| 9750 | HDGFRP3      | 1.02 | 2.55E-01 | 5.24E-01 | 1980.79  | not significant |
| 9751 | SLC41A3      | 1.02 | 2.90E-01 | 5.62E-01 | 1038.18  | not significant |
| 9752 | CD1A         | 1.02 | 2.86E-01 | 5.56E-01 | 829.18   | not significant |
| 9753 | RPS25        | 1.02 | 2.95E-01 | 5.66E-01 | 5201.36  | not significant |
| 9754 | GBA          | 1.02 | 2.33E-01 | 5.00E-01 | 296.66   | not significant |
| 9755 | GABRA5       | 1.02 | 2.06E-01 | 4.71E-01 | 259.67   | not significant |

|      |           |      |          |          |          |                 |
|------|-----------|------|----------|----------|----------|-----------------|
| 9756 | TRAK1     | 1.02 | 2.05E-01 | 4.70E-01 | 225.57   | not significant |
| 9757 | TP53INP2  | 1.02 | 1.69E-01 | 4.22E-01 | 166.86   | not significant |
| 9758 | C9orf9    | 1.02 | 1.49E-01 | 3.96E-01 | 136.97   | not significant |
| 9759 | HMGN2     | 1.02 | 2.56E-01 | 5.25E-01 | 11615.48 | not significant |
| 9760 | HNRNPA1   | 1.02 | 2.78E-01 | 5.48E-01 | 1690.49  | not significant |
| 9761 | CRTC3     | 1.02 | 2.76E-01 | 5.47E-01 | 1572.83  | not significant |
| 9762 | HDDC3     | 1.02 | 2.38E-01 | 5.06E-01 | 311.77   | not significant |
| 9763 | RELL2     | 1.02 | 1.89E-01 | 4.49E-01 | 204.53   | not significant |
| 9764 | CDAN1     | 1.02 | 2.79E-01 | 5.49E-01 | 1297.87  | not significant |
| 9765 | MEX3D     | 1.02 | 2.76E-01 | 5.46E-01 | 1539.97  | not significant |
| 9766 | FTL       | 1.02 | 3.85E-01 | 6.47E-01 | 13180.65 | not significant |
| 9767 | STIM2     | 1.02 | 2.82E-01 | 5.53E-01 | 1029.01  | not significant |
| 9768 | COX17     | 1.02 | 2.74E-01 | 5.44E-01 | 940.91   | not significant |
| 9769 | SDHAP2    | 1.02 | 7.34E-02 | NA       | 90.34    | not significant |
| 9770 | FMNL1     | 1.02 | 1.56E-01 | 4.05E-01 | 9135.10  | not significant |
| 9771 | RPL11     | 1.02 | 2.72E-01 | 5.43E-01 | 17617.55 | not significant |
| 9772 | HPRT1     | 1.02 | 2.21E-01 | 4.88E-01 | 3393.05  | not significant |
| 9773 | PCGF1     | 1.02 | 2.51E-01 | 5.19E-01 | 390.26   | not significant |
| 9774 | ACADS     | 1.02 | 2.59E-01 | 5.28E-01 | 565.12   | not significant |
| 9775 | TBC1D16   | 1.02 | 2.25E-01 | 4.93E-01 | 272.74   | not significant |
| 9776 | ZFPM1     | 1.02 | 1.60E-01 | 4.09E-01 | 164.61   | not significant |
| 9777 | VGLL4     | 1.02 | 2.34E-01 | 5.01E-01 | 2299.77  | not significant |
| 9778 | CCDC171   | 1.02 | 1.69E-01 | 4.23E-01 | 184.77   | not significant |
| 9779 | COMMD3    | 1.02 | 2.81E-01 | 5.52E-01 | 697.91   | not significant |
| 9780 | TMEM64    | 1.02 | 2.41E-01 | 5.09E-01 | 335.52   | not significant |
| 9781 | ADCK5     | 1.02 | 1.53E-01 | 4.01E-01 | 164.29   | not significant |
| 9782 | MIATNB    | 1.02 | 9.06E-02 | 2.88E-01 | 101.75   | not significant |
| 9783 | NDUFS2    | 1.02 | 2.50E-01 | 5.19E-01 | 1975.35  | not significant |
| 9784 | TMEM219   | 1.02 | 2.81E-01 | 5.52E-01 | 916.07   | not significant |
| 9785 | CCDC130   | 1.02 | 2.76E-01 | 5.47E-01 | 848.10   | not significant |
| 9786 | NDUFA6    | 1.02 | 2.77E-01 | 5.47E-01 | 679.88   | not significant |
| 9787 | IFTB1     | 1.02 | 2.54E-01 | 5.23E-01 | 406.70   | not significant |
| 9788 | MACROD1   | 1.02 | 2.11E-01 | 4.75E-01 | 284.93   | not significant |
| 9789 | GLB1L     | 1.02 | 4.27E-02 | NA       | 64.29    | not significant |
| 9790 | KDM4A     | 1.02 | 2.53E-01 | 5.21E-01 | 2014.70  | not significant |
| 9791 | FRG1      | 1.02 | 3.41E-01 | 6.08E-01 | 1036.17  | not significant |
| 9792 | HPS1      | 1.02 | 2.78E-01 | 5.48E-01 | 1190.97  | not significant |
| 9793 | APOA1BP   | 1.02 | 2.57E-01 | 5.25E-01 | 2047.96  | not significant |
| 9794 | SEC62     | 1.02 | 2.20E-01 | 4.87E-01 | 3664.75  | not significant |
| 9795 | VPS16     | 1.02 | 2.68E-01 | 5.38E-01 | 1542.89  | not significant |
| 9796 | AIG1      | 1.02 | 2.33E-01 | 5.00E-01 | 335.11   | not significant |
| 9797 | SNTA1     | 1.02 | 2.16E-01 | 4.82E-01 | 310.16   | not significant |
| 9798 | SCN8A     | 1.02 | 2.59E-01 | 5.28E-01 | 579.76   | not significant |
| 9799 | SLC24A1   | 1.02 | 1.83E-01 | 4.41E-01 | 212.47   | not significant |
| 9800 | GPR113    | 1.02 | 1.48E-01 | 3.93E-01 | 161.68   | not significant |
| 9801 | HIST1H1C  | 1.02 | 9.20E-02 | NA       | 97.72    | not significant |
| 9802 | FAM127A   | 1.02 | 1.49E-01 | 3.95E-01 | 180.99   | not significant |
| 9803 | TPM4      | 1.02 | 1.44E-01 | 3.88E-01 | 9478.61  | not significant |
| 9804 | CUL4B     | 1.02 | 2.42E-01 | 5.10E-01 | 2489.14  | not significant |
| 9805 | RHBDD1    | 1.02 | 2.68E-01 | 5.38E-01 | 1435.11  | not significant |
| 9806 | CLDN12    | 1.02 | 2.68E-01 | 5.39E-01 | 675.44   | not significant |
| 9807 | SNHG12    | 1.02 | 2.67E-01 | 5.38E-01 | 568.82   | not significant |
| 9808 | TMEM80    | 1.02 | 1.85E-01 | 4.44E-01 | 199.35   | not significant |
| 9809 | ACTR6     | 1.02 | 2.77E-01 | 5.47E-01 | 1108.53  | not significant |
| 9810 | SLC12A7   | 1.02 | 2.66E-01 | 5.37E-01 | 1627.46  | not significant |
| 9811 | C19orf68  | 1.02 | 2.49E-01 | 5.17E-01 | 416.11   | not significant |
| 9812 | CRYL1     | 1.02 | 1.24E-01 | 3.52E-01 | 120.91   | not significant |
| 9813 | CCT6P1    | 1.02 | 1.07E-01 | 3.21E-01 | 106.89   | not significant |
| 9814 | GFER      | 1.02 | 2.67E-01 | 5.38E-01 | 808.74   | not significant |
| 9815 | HSPB11    | 1.02 | 2.50E-01 | 5.18E-01 | 1495.16  | not significant |
| 9816 | UXS1      | 1.02 | 2.64E-01 | 5.35E-01 | 1574.70  | not significant |
| 9817 | C14orf142 | 1.02 | 2.70E-01 | 5.41E-01 | 861.06   | not significant |
| 9818 | MAP4K2    | 1.02 | 2.73E-01 | 5.43E-01 | 1098.17  | not significant |
| 9819 | TIAM2     | 1.02 | 2.13E-01 | 4.78E-01 | 274.92   | not significant |
| 9820 | LMO2      | 1.02 | 1.58E-01 | 4.06E-01 | 7709.05  | not significant |
| 9821 | ADPGK     | 1.02 | 2.96E-01 | 5.66E-01 | 1651.92  | not significant |
| 9822 | EBLN3     | 1.02 | 2.30E-01 | 4.97E-01 | 3253.39  | not significant |
| 9823 | MSRB2     | 1.02 | 2.24E-01 | 4.91E-01 | 307.41   | not significant |
| 9824 | ZNF524    | 1.02 | 1.30E-01 | 3.62E-01 | 119.22   | not significant |
| 9825 | TIMM10    | 1.02 | 2.69E-01 | 5.40E-01 | 1242.94  | not significant |
| 9826 | ZFP62     | 1.02 | 2.72E-01 | 5.43E-01 | 1011.71  | not significant |
| 9827 | ZNF548    | 1.02 | 2.67E-01 | 5.38E-01 | 707.70   | not significant |
| 9828 | TMEM63A   | 1.02 | 2.41E-01 | 5.10E-01 | 463.31   | not significant |
| 9829 | LNPEP     | 1.02 | 2.03E-01 | 4.67E-01 | 1742.16  | not significant |
| 9830 | MARVELD1  | 1.02 | 1.57E-01 | 4.05E-01 | 171.13   | not significant |
| 9831 | PHRF1     | 1.02 | 1.95E-01 | 4.57E-01 | 4428.95  | not significant |
| 9832 | ARFIP2    | 1.02 | 2.56E-01 | 5.24E-01 | 1573.51  | not significant |
| 9833 | TMEM55B   | 1.02 | 2.67E-01 | 5.38E-01 | 1025.31  | not significant |
| 9834 | SLC10A7   | 1.02 | 2.67E-01 | 5.38E-01 | 915.86   | not significant |
| 9835 | ERMP1     | 1.02 | 2.30E-01 | 4.97E-01 | 333.55   | not significant |
| 9836 | TP53TG1   | 1.02 | 1.55E-01 | 4.03E-01 | 160.05   | not significant |
| 9837 | SULT1A1   | 1.02 | 1.64E-01 | 4.15E-01 | 174.18   | not significant |
| 9838 | POLA2     | 1.02 | 2.10E-01 | 4.74E-01 | 3112.50  | not significant |
| 9839 | TPST2     | 1.02 | 2.28E-01 | 4.95E-01 | 2121.77  | not significant |
| 9840 | RBL1      | 1.02 | 2.27E-01 | 4.95E-01 | 4065.94  | not significant |
| 9841 | CC2D1B    | 1.02 | 2.64E-01 | 5.34E-01 | 1499.53  | not significant |
| 9842 | NME4      | 1.02 | 2.68E-01 | 5.39E-01 | 1262.91  | not significant |
| 9843 | GTF2H4    | 1.02 | 2.63E-01 | 5.34E-01 | 784.68   | not significant |

|      |            |      |          |          |          |                 |
|------|------------|------|----------|----------|----------|-----------------|
| 9844 | FUNDC2     | 1.02 | 2.40E-01 | 5.08E-01 | 596.39   | not significant |
| 9845 | SPPL3      | 1.02 | 2.08E-01 | 4.73E-01 | 3155.35  | not significant |
| 9846 | ZDHH4      | 1.02 | 2.65E-01 | 5.36E-01 | 1294.78  | not significant |
| 9847 | CCDC42B    | 1.02 | 7.53E-02 | NA       | 86.04    | not significant |
| 9848 | GPC1       | 1.02 | 8.18E-02 | NA       | 89.87    | not significant |
| 9849 | AP5Z1      | 1.02 | 2.45E-01 | 5.12E-01 | 1922.23  | not significant |
| 9850 | LY96       | 1.02 | 1.15E-01 | 3.36E-01 | 124.08   | not significant |
| 9851 | ARL16      | 1.02 | 2.58E-01 | 5.26E-01 | 1536.80  | not significant |
| 9852 | ATPIF1     | 1.02 | 2.37E-01 | 5.04E-01 | 2194.32  | not significant |
| 9853 | EHP1L1     | 1.02 | 2.19E-01 | 4.86E-01 | 2236.93  | not significant |
| 9854 | CETN2      | 1.02 | 1.22E-01 | 3.50E-01 | 131.38   | not significant |
| 9855 | SV2A       | 1.02 | 2.42E-01 | 5.10E-01 | 460.80   | not significant |
| 9856 | PSAP       | 1.02 | 1.34E-01 | 3.69E-01 | 23674.72 | not significant |
| 9857 | DAZAP2     | 1.02 | 1.63E-01 | 4.14E-01 | 10798.01 | not significant |
| 9858 | SLC50A1    | 1.02 | 2.66E-01 | 5.37E-01 | 1077.74  | not significant |
| 9859 | BTBD6      | 1.02 | 2.59E-01 | 5.28E-01 | 1291.39  | not significant |
| 9860 | ANKRD10    | 1.02 | 2.28E-01 | 4.95E-01 | 2078.78  | not significant |
| 9861 | RALGPS2    | 1.02 | 2.65E-01 | 5.36E-01 | 1005.74  | not significant |
| 9862 | DXO        | 1.02 | 9.04E-02 | NA       | 97.11    | not significant |
| 9863 | HEMGN      | 1.02 | 9.83E-02 | 3.05E-01 | 106.90   | not significant |
| 9864 | HNRNPA0    | 1.02 | 1.79E-01 | 4.36E-01 | 15335.51 | not significant |
| 9865 | C19orf66   | 1.02 | 2.62E-01 | 5.32E-01 | 1058.04  | not significant |
| 9866 | TCAM1P     | 1.02 | 1.40E-02 | NA       | 44.15    | not significant |
| 9867 | SARS       | 1.02 | 1.78E-01 | 4.34E-01 | 5439.39  | not significant |
| 9868 | ZNF280D    | 1.02 | 2.62E-01 | 5.32E-01 | 827.81   | not significant |
| 9869 | MEX3A      | 1.02 | 2.59E-01 | 5.28E-01 | 930.05   | not significant |
| 9870 | MRPL45     | 1.02 | 2.19E-01 | 4.86E-01 | 354.85   | not significant |
| 9871 | UBR4       | 1.02 | 2.80E-01 | 5.51E-01 | 6678.13  | not significant |
| 9872 | PACSN2     | 1.02 | 2.15E-01 | 4.81E-01 | 2674.17  | not significant |
| 9873 | PPP1R35    | 1.02 | 2.50E-01 | 5.19E-01 | 1494.65  | not significant |
| 9874 | IRF2BP1    | 1.02 | 2.46E-01 | 5.14E-01 | 1861.08  | not significant |
| 9875 | MGRN1      | 1.02 | 2.36E-01 | 5.03E-01 | 2131.18  | not significant |
| 9876 | ATP10A     | 1.02 | 2.59E-01 | 5.28E-01 | 874.95   | not significant |
| 9877 | EVPL       | 1.02 | 2.56E-01 | 5.25E-01 | 633.65   | not significant |
| 9878 | PPP6R2     | 1.02 | 2.06E-01 | 4.71E-01 | 2365.73  | not significant |
| 9879 | PSKH1      | 1.02 | 2.61E-01 | 5.31E-01 | 1156.18  | not significant |
| 9880 | SBF2-AS1   | 1.02 | 1.82E-01 | 4.39E-01 | 222.45   | not significant |
| 9881 | PITX1      | 1.02 | 1.61E-01 | 4.11E-01 | 194.71   | not significant |
| 9882 | SIX5       | 1.02 | 1.26E-01 | 3.56E-01 | 151.86   | not significant |
| 9883 | ARL17A     | 1.02 | 1.12E-01 | 3.31E-01 | 124.57   | not significant |
| 9884 | PDIA4      | 1.02 | 1.58E-01 | 4.07E-01 | 9854.43  | not significant |
| 9885 | TSPAN14    | 1.02 | 2.43E-01 | 5.11E-01 | 1813.10  | not significant |
| 9886 | OSBPL2     | 1.02 | 2.61E-01 | 5.31E-01 | 952.63   | not significant |
| 9887 | FAM92A1    | 1.02 | 2.33E-01 | 5.01E-01 | 436.84   | not significant |
| 9888 | RNF125     | 1.02 | 1.46E-01 | 3.90E-01 | 172.44   | not significant |
| 9889 | CLSTN1     | 1.02 | 1.70E-01 | 4.23E-01 | 9136.68  | not significant |
| 9890 | GSS        | 1.02 | 2.04E-01 | 4.69E-01 | 2818.04  | not significant |
| 9891 | DYNC112    | 1.02 | 2.23E-01 | 4.90E-01 | 2021.26  | not significant |
| 9892 | ZC3H6      | 1.02 | 1.97E-01 | 4.61E-01 | 280.15   | not significant |
| 9893 | SFT2D2     | 1.02 | 2.10E-01 | 4.74E-01 | 325.22   | not significant |
| 9894 | CHD6       | 1.02 | 2.04E-01 | 4.69E-01 | 3358.69  | not significant |
| 9895 | RDH11      | 1.02 | 1.95E-01 | 4.57E-01 | 4253.95  | not significant |
| 9896 | CPSF3L     | 1.02 | 2.16E-01 | 4.82E-01 | 2545.69  | not significant |
| 9897 | PTDSS2     | 1.02 | 2.48E-01 | 5.15E-01 | 1342.32  | not significant |
| 9898 | TMEM69     | 1.02 | 2.55E-01 | 5.24E-01 | 990.49   | not significant |
| 9899 | RPS3       | 1.02 | 2.78E-01 | 5.48E-01 | 29820.86 | not significant |
| 9900 | LRFN3      | 1.02 | 2.57E-01 | 5.26E-01 | 644.51   | not significant |
| 9901 | LINC01096  | 1.02 | 1.13E-02 | NA       | 40.97    | not significant |
| 9902 | ZNF473     | 1.02 | 2.57E-01 | 5.26E-01 | 1035.12  | not significant |
| 9903 | SNIP1      | 1.02 | 2.55E-01 | 5.23E-01 | 928.31   | not significant |
| 9904 | STK11IP    | 1.02 | 2.55E-01 | 5.23E-01 | 867.06   | not significant |
| 9905 | KIF3C      | 1.02 | 2.43E-01 | 5.11E-01 | 858.85   | not significant |
| 9906 | SLC25A26   | 1.02 | 2.40E-01 | 5.08E-01 | 466.28   | not significant |
| 9907 | SMDT1      | 1.02 | 1.79E-01 | 4.36E-01 | 227.21   | not significant |
| 9908 | RHOBTB1    | 1.02 | 1.91E-01 | 4.51E-01 | 261.05   | not significant |
| 9909 | DOLK       | 1.02 | 1.82E-01 | 4.39E-01 | 235.76   | not significant |
| 9910 | FAM210B    | 1.02 | 9.98E-02 | 3.08E-01 | 116.80   | not significant |
| 9911 | SUSD3      | 1.02 | 8.47E-02 | NA       | 98.26    | not significant |
| 9912 | RDH14      | 1.02 | 4.04E-02 | NA       | 66.99    | not significant |
| 9913 | CLIC1      | 1.02 | 2.44E-01 | 5.12E-01 | 2683.02  | not significant |
| 9914 | TMEM209    | 1.02 | 2.10E-01 | 4.74E-01 | 3969.05  | not significant |
| 9915 | NCKAP5L    | 1.02 | 2.33E-01 | 5.01E-01 | 1633.25  | not significant |
| 9916 | ZBTB6      | 1.02 | 2.52E-01 | 5.21E-01 | 654.54   | not significant |
| 9917 | BLOC1S4    | 1.02 | 2.42E-01 | 5.10E-01 | 535.14   | not significant |
| 9918 | NUP50-AS1  | 1.02 | 1.82E-01 | 4.40E-01 | 232.50   | not significant |
| 9919 | ACACB      | 1.02 | 2.20E-01 | 4.87E-01 | 422.24   | not significant |
| 9920 | TOPORS-AS1 | 1.02 | 2.45E-02 | NA       | 52.75    | not significant |
| 9921 | MAP2K2     | 1.03 | 1.97E-01 | 4.60E-01 | 4482.45  | not significant |
| 9922 | VAMP5      | 1.03 | 2.79E-01 | 5.50E-01 | 1019.33  | not significant |
| 9923 | CDK17      | 1.03 | 2.07E-01 | 4.71E-01 | 2176.24  | not significant |
| 9924 | TAF11      | 1.03 | 2.36E-01 | 5.03E-01 | 1399.50  | not significant |
| 9925 | OSEF1      | 1.03 | 2.55E-01 | 5.23E-01 | 857.17   | not significant |
| 9926 | CBX5       | 1.03 | 2.07E-01 | 4.72E-01 | 14588.95 | not significant |
| 9927 | HINT2      | 1.03 | 2.53E-01 | 5.22E-01 | 753.24   | not significant |
| 9928 | GPR174     | 1.03 | 2.47E-01 | 5.15E-01 | 891.45   | not significant |
| 9929 | NT5C3B     | 1.03 | 2.48E-01 | 5.16E-01 | 663.66   | not significant |
| 9930 | WDR19      | 1.03 | 2.31E-01 | 4.99E-01 | 560.93   | not significant |
| 9931 | RPL10A     | 1.03 | 2.05E-01 | 4.70E-01 | 13014.31 | not significant |

|       |              |      |          |          |          |                 |
|-------|--------------|------|----------|----------|----------|-----------------|
| 9932  | ERO1L        | 1.03 | 2.19E-01 | 4.86E-01 | 3974.88  | not significant |
| 9933  | ZFYVE26      | 1.03 | 2.40E-01 | 5.08E-01 | 1319.14  | not significant |
| 9934  | GUCY1B3      | 1.03 | 2.52E-01 | 5.20E-01 | 1051.28  | not significant |
| 9935  | LAIR1        | 1.03 | 2.45E-01 | 5.13E-01 | 969.36   | not significant |
| 9936  | LEPROT       | 1.03 | 2.46E-01 | 5.14E-01 | 743.85   | not significant |
| 9937  | CEP68        | 1.03 | 2.28E-01 | 4.96E-01 | 428.68   | not significant |
| 9938  | COIL         | 1.03 | 2.44E-01 | 5.12E-01 | 1177.26  | not significant |
| 9939  | ZNF184       | 1.03 | 2.46E-01 | 5.14E-01 | 1237.50  | not significant |
| 9940  | AGTPBP1      | 1.03 | 2.46E-01 | 5.14E-01 | 944.54   | not significant |
| 9941  | ACOT8        | 1.03 | 2.40E-01 | 5.08E-01 | 694.82   | not significant |
| 9942  | ZNF506       | 1.03 | 2.49E-01 | 5.17E-01 | 934.91   | not significant |
| 9943  | CNPY4        | 1.03 | 2.41E-01 | 5.10E-01 | 516.24   | not significant |
| 9944  | LTN1         | 1.03 | 2.43E-01 | 5.11E-01 | 1772.66  | not significant |
| 9945  | RFXAP        | 1.03 | 2.45E-01 | 5.13E-01 | 654.58   | not significant |
| 9946  | GCC2         | 1.03 | 2.48E-01 | 5.15E-01 | 1277.77  | not significant |
| 9947  | PAX9         | 1.03 | 2.35E-01 | 5.01E-01 | 470.28   | not significant |
| 9948  | PSMA1        | 1.03 | 1.52E-01 | 3.99E-01 | 7701.30  | not significant |
| 9949  | SH2D1A       | 1.03 | 1.53E-01 | 4.01E-01 | 7727.35  | not significant |
| 9950  | SPICE1       | 1.03 | 2.43E-01 | 5.11E-01 | 700.01   | not significant |
| 9951  | BET1         | 1.03 | 2.41E-01 | 5.09E-01 | 782.75   | not significant |
| 9952  | KLHL2        | 1.03 | 2.26E-01 | 4.94E-01 | 388.47   | not significant |
| 9953  | C1R          | 1.03 | 1.85E-01 | 4.44E-01 | 261.73   | not significant |
| 9954  | GADD45A      | 1.03 | 1.12E-01 | 3.31E-01 | 134.60   | not significant |
| 9955  | ANP32B       | 1.03 | 1.90E-01 | 4.49E-01 | 13661.29 | not significant |
| 9956  | TMEM8A       | 1.03 | 2.21E-01 | 4.87E-01 | 1777.58  | not significant |
| 9957  | ATXN2        | 1.03 | 2.36E-01 | 5.03E-01 | 1618.10  | not significant |
| 9958  | SDHAF1       | 1.03 | 2.25E-01 | 4.92E-01 | 545.31   | not significant |
| 9959  | TMEM156      | 1.03 | 1.75E-01 | 4.31E-01 | 256.66   | not significant |
| 9960  | HSD17B12     | 1.03 | 1.73E-01 | 4.27E-01 | 3690.76  | not significant |
| 9961  | NELFA        | 1.03 | 2.44E-01 | 5.12E-01 | 1656.66  | not significant |
| 9962  | C15orf40     | 1.03 | 2.10E-01 | 4.74E-01 | 339.76   | not significant |
| 9963  | RNF103       | 1.03 | 2.15E-01 | 4.81E-01 | 429.26   | not significant |
| 9964  | WDR45        | 1.03 | 1.57E-01 | 4.05E-01 | 205.95   | not significant |
| 9965  | TKT          | 1.03 | 1.55E-01 | 4.03E-01 | 8655.86  | not significant |
| 9966  | EDF1         | 1.03 | 2.11E-01 | 4.75E-01 | 3209.54  | not significant |
| 9967  | CLK1         | 1.03 | 2.06E-01 | 4.71E-01 | 1721.26  | not significant |
| 9968  | MCOLN1       | 1.03 | 2.36E-01 | 5.03E-01 | 519.36   | not significant |
| 9969  | VPS29        | 1.03 | 2.00E-01 | 4.64E-01 | 2143.84  | not significant |
| 9970  | EIF3F        | 1.03 | 1.76E-01 | 4.32E-01 | 4014.98  | not significant |
| 9971  | TNFRSF1A     | 1.03 | 2.09E-01 | 4.74E-01 | 2402.28  | not significant |
| 9972  | SLC40A1      | 1.03 | 2.26E-01 | 4.94E-01 | 1739.37  | not significant |
| 9973  | ZFP14        | 1.03 | 2.29E-01 | 4.96E-01 | 514.25   | not significant |
| 9974  | 43709_19983  | 1.03 | 1.59E-01 | 4.09E-01 | 7400.61  | not significant |
| 9975  | ATAD2        | 1.03 | 1.39E-01 | 3.79E-01 | 11345.88 | not significant |
| 9976  | INTS1        | 1.03 | 1.57E-01 | 4.05E-01 | 6094.40  | not significant |
| 9977  | DMAP1        | 1.03 | 2.32E-01 | 4.99E-01 | 861.38   | not significant |
| 9978  | EXOC6        | 1.03 | 2.38E-01 | 5.06E-01 | 983.41   | not significant |
| 9979  | SFR1         | 1.03 | 1.86E-01 | 4.44E-01 | 302.87   | not significant |
| 9980  | QSOX1        | 1.03 | 2.42E-01 | 5.10E-01 | 1057.50  | not significant |
| 9981  | ABHD14B      | 1.03 | 2.39E-01 | 5.07E-01 | 854.45   | not significant |
| 9982  | TRAF6        | 1.03 | 2.37E-01 | 5.05E-01 | 808.28   | not significant |
| 9983  | LOC81691     | 1.03 | 2.19E-01 | 4.86E-01 | 425.91   | not significant |
| 9984  | CCDC127      | 1.03 | 2.33E-01 | 5.00E-01 | 531.42   | not significant |
| 9985  | B4GAL7       | 1.03 | 2.14E-01 | 4.79E-01 | 363.40   | not significant |
| 9986  | ATP13A2      | 1.03 | 2.15E-01 | 4.81E-01 | 1889.03  | not significant |
| 9987  | ADCK2        | 1.03 | 2.33E-01 | 5.00E-01 | 1644.31  | not significant |
| 9988  | CRTC2        | 1.03 | 2.32E-01 | 4.99E-01 | 1323.84  | not significant |
| 9989  | ARID5B       | 1.03 | 2.39E-01 | 5.07E-01 | 949.01   | not significant |
| 9990  | BIN1         | 1.03 | 2.25E-01 | 4.92E-01 | 525.32   | not significant |
| 9991  | ZKSCAN3      | 1.03 | 1.78E-01 | 4.34E-01 | 253.41   | not significant |
| 9992  | MAT2B        | 1.03 | 1.99E-01 | 4.64E-01 | 3528.95  | not significant |
| 9993  | ANKRD13D     | 1.03 | 2.14E-01 | 4.79E-01 | 1784.83  | not significant |
| 9994  | FCHSD2       | 1.03 | 2.08E-01 | 4.73E-01 | 2720.06  | not significant |
| 9995  | EPC1         | 1.03 | 2.23E-01 | 4.91E-01 | 1533.33  | not significant |
| 9996  | ABCB8        | 1.03 | 2.23E-01 | 4.91E-01 | 1691.77  | not significant |
| 9997  | PROSER3      | 1.03 | 2.21E-01 | 4.88E-01 | 489.33   | not significant |
| 9998  | RPL13        | 1.03 | 1.84E-01 | 4.42E-01 | 27121.48 | not significant |
| 9999  | LOC101927815 | 1.03 | 3.69E-02 | NA       | 66.62    | not significant |
| 10000 | FBRS         | 1.03 | 1.91E-01 | 4.51E-01 | 3010.71  | not significant |
| 10001 | C19orf10     | 1.03 | 2.22E-01 | 4.89E-01 | 2200.62  | not significant |
| 10002 | KIFAP3       | 1.03 | 2.37E-01 | 5.04E-01 | 996.70   | not significant |
| 10003 | HLCS         | 1.03 | 2.35E-01 | 5.02E-01 | 803.13   | not significant |
| 10004 | RNF170       | 1.03 | 2.26E-01 | 4.94E-01 | 554.42   | not significant |
| 10005 | MGAT4A       | 1.03 | 1.80E-01 | 4.37E-01 | 5787.26  | not significant |
| 10006 | S100PBP      | 1.03 | 2.15E-01 | 4.80E-01 | 1879.68  | not significant |
| 10007 | CDK9         | 1.03 | 2.05E-01 | 4.70E-01 | 1936.94  | not significant |
| 10008 | TRIM13       | 1.03 | 2.20E-01 | 4.87E-01 | 1476.74  | not significant |
| 10009 | SIL1         | 1.03 | 2.14E-01 | 4.79E-01 | 405.90   | not significant |
| 10010 | TRAF3IP2     | 1.03 | 2.25E-01 | 4.93E-01 | 510.31   | not significant |
| 10011 | CACNB2       | 1.03 | 1.75E-01 | 4.31E-01 | 262.40   | not significant |
| 10012 | PCCB         | 1.03 | 1.82E-01 | 4.40E-01 | 2366.69  | not significant |
| 10013 | FHOD1        | 1.03 | 2.02E-01 | 4.67E-01 | 2008.63  | not significant |
| 10014 | ANKMY1       | 1.03 | 2.07E-01 | 4.71E-01 | 381.07   | not significant |
| 10015 | LINC00657    | 1.03 | 1.10E-01 | 3.27E-01 | 11194.70 | not significant |
| 10016 | ZMIZ1        | 1.03 | 2.29E-01 | 4.96E-01 | 6133.83  | not significant |
| 10017 | INPP5K       | 1.03 | 2.31E-01 | 4.99E-01 | 1267.79  | not significant |
| 10018 | CD52         | 1.03 | 2.34E-01 | 5.01E-01 | 716.93   | not significant |
| 10019 | FNIP1        | 1.03 | 2.34E-01 | 5.01E-01 | 1125.06  | not significant |

|       |            |      |          |          |          |                 |
|-------|------------|------|----------|----------|----------|-----------------|
| 10020 | CRIP1      | 1.03 | 2.01E-01 | 4.65E-01 | 390.10   | not significant |
| 10021 | SIMC1      | 1.03 | 2.07E-01 | 4.71E-01 | 394.67   | not significant |
| 10022 | CTDNBP1    | 1.03 | 1.41E-01 | 3.82E-01 | 5727.97  | not significant |
| 10023 | PEX14      | 1.03 | 2.33E-01 | 5.00E-01 | 1045.75  | not significant |
| 10024 | ARAP2      | 1.03 | 2.30E-01 | 4.98E-01 | 1312.37  | not significant |
| 10025 | OFD1       | 1.03 | 2.25E-01 | 4.92E-01 | 862.98   | not significant |
| 10026 | PI4KAP1    | 1.03 | 4.70E-02 | NA       | 83.80    | not significant |
| 10027 | ZBTB5      | 1.03 | 2.21E-01 | 4.88E-01 | 1388.35  | not significant |
| 10028 | CCDC15     | 1.03 | 2.09E-01 | 4.73E-01 | 418.97   | not significant |
| 10029 | STAG3L2    | 1.03 | 1.42E-01 | 3.83E-01 | 195.00   | not significant |
| 10030 | ZNF554     | 1.03 | 7.34E-02 | 2.53E-01 | 100.77   | not significant |
| 10031 | OS9        | 1.03 | 1.63E-01 | 4.14E-01 | 4179.54  | not significant |
| 10032 | NUDT2      | 1.03 | 2.27E-01 | 4.95E-01 | 739.16   | not significant |
| 10033 | EFCAB11    | 1.03 | 1.87E-01 | 4.46E-01 | 219.74   | not significant |
| 10034 | EME2       | 1.03 | 7.56E-02 | 2.57E-01 | 139.93   | not significant |
| 10035 | GPBP1L1    | 1.03 | 1.30E-01 | 3.62E-01 | 5314.25  | not significant |
| 10036 | NDUFAF3    | 1.03 | 2.29E-01 | 4.96E-01 | 1478.75  | not significant |
| 10037 | PSENIEN    | 1.03 | 2.29E-01 | 4.97E-01 | 911.23   | not significant |
| 10038 | USP40      | 1.03 | 2.28E-01 | 4.95E-01 | 752.27   | not significant |
| 10039 | ERCC6      | 1.03 | 1.89E-01 | 4.48E-01 | 371.65   | not significant |
| 10040 | NR1D2      | 1.03 | 2.00E-01 | 4.64E-01 | 369.31   | not significant |
| 10041 | C5orf42    | 1.03 | 1.51E-01 | 3.99E-01 | 1440.18  | not significant |
| 10042 | SUSD1      | 1.03 | 1.40E-01 | 3.81E-01 | 185.77   | not significant |
| 10043 | TMEM242    | 1.03 | 7.57E-02 | 2.57E-01 | 119.75   | not significant |
| 10044 | CHN2       | 1.03 | 1.79E-01 | 4.36E-01 | 2830.96  | not significant |
| 10045 | GTPBP1     | 1.03 | 1.90E-01 | 4.49E-01 | 2232.84  | not significant |
| 10046 | TMEM170B   | 1.03 | 2.27E-01 | 4.95E-01 | 1054.95  | not significant |
| 10047 | MBTD1      | 1.03 | 2.09E-01 | 4.74E-01 | 1490.66  | not significant |
| 10048 | HCF1R1     | 1.03 | 1.86E-01 | 4.44E-01 | 411.54   | not significant |
| 10049 | MZT2A      | 1.03 | 2.26E-01 | 4.94E-01 | 1858.27  | not significant |
| 10050 | SPN        | 1.03 | 1.40E-01 | 3.81E-01 | 22640.05 | not significant |
| 10051 | MED15      | 1.03 | 1.92E-01 | 4.52E-01 | 2002.43  | not significant |
| 10052 | TUBGCP3    | 1.03 | 1.87E-01 | 4.46E-01 | 2437.87  | not significant |
| 10053 | SNN        | 1.03 | 2.17E-01 | 4.83E-01 | 1358.01  | not significant |
| 10054 | NAA38      | 1.03 | 2.19E-01 | 4.86E-01 | 760.94   | not significant |
| 10055 | DTX2       | 1.03 | 2.22E-01 | 4.89E-01 | 609.78   | not significant |
| 10056 | ZSWIM4     | 1.03 | 1.92E-01 | 4.53E-01 | 334.53   | not significant |
| 10057 | NME3       | 1.03 | 9.37E-02 | 2.95E-01 | 148.43   | not significant |
| 10058 | IPO9       | 1.03 | 1.67E-01 | 4.20E-01 | 4765.83  | not significant |
| 10059 | BTN2A2     | 1.03 | 2.13E-01 | 4.78E-01 | 478.81   | not significant |
| 10060 | PIGB       | 1.03 | 1.65E-01 | 4.16E-01 | 237.14   | not significant |
| 10061 | DNMT1      | 1.03 | 9.67E-02 | 3.02E-01 | 16986.46 | not significant |
| 10062 | TK1        | 1.03 | 2.22E-01 | 4.89E-01 | 1102.99  | not significant |
| 10063 | COG4       | 1.03 | 2.22E-01 | 4.89E-01 | 998.83   | not significant |
| 10064 | SMI11      | 1.03 | 2.17E-01 | 4.83E-01 | 708.40   | not significant |
| 10065 | TRIM52-AS1 | 1.03 | 1.89E-01 | 4.48E-01 | 339.40   | not significant |
| 10066 | PICK1      | 1.03 | 1.71E-01 | 4.25E-01 | 255.45   | not significant |
| 10067 | MYL12A     | 1.03 | 1.54E-01 | 4.02E-01 | 5360.29  | not significant |
| 10068 | SOAT1      | 1.03 | 1.77E-01 | 4.34E-01 | 3714.45  | not significant |
| 10069 | ARHGAP1    | 1.03 | 1.99E-01 | 4.63E-01 | 1826.15  | not significant |
| 10070 | PLCL2      | 1.03 | 2.13E-01 | 4.78E-01 | 1401.99  | not significant |
| 10071 | COMM6      | 1.03 | 2.19E-01 | 4.86E-01 | 1205.08  | not significant |
| 10072 | TSHZ1      | 1.03 | 2.19E-01 | 4.86E-01 | 1250.60  | not significant |
| 10073 | HLA-H      | 1.03 | 1.20E-01 | 3.45E-01 | 156.31   | not significant |
| 10074 | DPP4       | 1.03 | 1.31E-01 | 3.64E-01 | 6858.71  | not significant |
| 10075 | KIF21B     | 1.03 | 1.73E-01 | 4.27E-01 | 8645.06  | not significant |
| 10076 | MRPS26     | 1.03 | 2.17E-01 | 4.83E-01 | 2391.66  | not significant |
| 10077 | PANK4      | 1.03 | 2.21E-01 | 4.88E-01 | 1035.22  | not significant |
| 10078 | IFNGR1     | 1.03 | 2.12E-01 | 4.76E-01 | 873.15   | not significant |
| 10079 | MUL1       | 1.03 | 2.02E-01 | 4.67E-01 | 790.68   | not significant |
| 10080 | LOC440434  | 1.03 | 1.30E-02 | NA       | 48.85    | not significant |
| 10081 | ORMDL2     | 1.03 | 2.22E-01 | 4.89E-01 | 830.73   | not significant |
| 10082 | TSEN54     | 1.03 | 1.86E-01 | 4.44E-01 | 2589.28  | not significant |
| 10083 | RPL5       | 1.03 | 1.53E-01 | 4.00E-01 | 23537.97 | not significant |
| 10084 | TMEM106B   | 1.03 | 1.94E-01 | 4.55E-01 | 2082.68  | not significant |
| 10085 | TMEM260    | 1.03 | 3.68E-02 | 1.60E-01 | 1490.75  | not significant |
| 10086 | SNRPA      | 1.03 | 1.57E-01 | 4.05E-01 | 5197.34  | not significant |
| 10087 | SPG21      | 1.03 | 1.85E-01 | 4.44E-01 | 2011.32  | not significant |
| 10088 | PRMT2      | 1.03 | 2.08E-01 | 4.73E-01 | 1296.33  | not significant |
| 10089 | NMT2       | 1.03 | 1.92E-01 | 4.52E-01 | 749.17   | not significant |
| 10090 | FAM175A    | 1.03 | 1.88E-01 | 4.48E-01 | 358.31   | not significant |
| 10091 | PTPLAD1    | 1.03 | 1.24E-01 | 3.52E-01 | 6644.50  | not significant |
| 10092 | JAGN1      | 1.03 | 2.05E-01 | 4.70E-01 | 1235.24  | not significant |
| 10093 | CTBP1      | 1.03 | 1.42E-01 | 3.84E-01 | 7364.46  | not significant |
| 10094 | ATP6V0C    | 1.03 | 1.82E-01 | 4.40E-01 | 3937.18  | not significant |
| 10095 | ATRAID     | 1.03 | 2.04E-01 | 4.69E-01 | 2061.77  | not significant |
| 10096 | NIFK-AS1   | 1.03 | 1.55E-01 | 4.04E-01 | 271.34   | not significant |
| 10097 | RPL9       | 1.03 | 1.75E-01 | 4.31E-01 | 15159.78 | not significant |
| 10098 | TMEM9B     | 1.03 | 2.04E-01 | 4.70E-01 | 1004.64  | not significant |
| 10099 | ARSG       | 1.03 | 1.99E-01 | 4.63E-01 | 424.83   | not significant |
| 10100 | RXRB       | 1.03 | 1.84E-01 | 4.42E-01 | 331.28   | not significant |
| 10101 | MROH1      | 1.03 | 1.13E-01 | 3.32E-01 | 162.24   | not significant |
| 10102 | GABARAP    | 1.03 | 1.92E-01 | 4.52E-01 | 2430.22  | not significant |
| 10103 | STK25      | 1.03 | 1.68E-01 | 4.21E-01 | 2646.24  | not significant |
| 10104 | RNF144A    | 1.03 | 1.56E-01 | 4.05E-01 | 3567.66  | not significant |
| 10105 | CEPT1      | 1.03 | 1.68E-01 | 4.22E-01 | 2147.15  | not significant |
| 10106 | IL6ST      | 1.03 | 2.13E-01 | 4.78E-01 | 714.55   | not significant |
| 10107 | CYP4V2     | 1.03 | 2.03E-01 | 4.69E-01 | 619.08   | not significant |

|       |            |      |          |          |          |                 |
|-------|------------|------|----------|----------|----------|-----------------|
| 10108 | NAAA       | 1.03 | 1.56E-01 | 4.04E-01 | 262.82   | not significant |
| 10109 | HADH       | 1.03 | 1.79E-01 | 4.36E-01 | 3558.30  | not significant |
| 10110 | CUEDC2     | 1.03 | 2.06E-01 | 4.71E-01 | 2116.84  | not significant |
| 10111 | FBXL17     | 1.03 | 2.06E-01 | 4.71E-01 | 1356.75  | not significant |
| 10112 | GSTZ1      | 1.03 | 1.37E-01 | 3.75E-01 | 279.65   | not significant |
| 10113 | PAQR6      | 1.03 | 1.37E-01 | 3.75E-01 | 201.87   | not significant |
| 10114 | ARHGAP21   | 1.03 | 2.23E-01 | 4.89E-01 | 2112.94  | not significant |
| 10115 | GOLGA5     | 1.03 | 2.09E-01 | 4.73E-01 | 826.27   | not significant |
| 10116 | FSTL1      | 1.03 | 1.95E-01 | 4.57E-01 | 464.56   | not significant |
| 10117 | SPAG16     | 1.03 | 1.83E-01 | 4.40E-01 | 334.75   | not significant |
| 10118 | PEX2       | 1.03 | 1.79E-01 | 4.36E-01 | 2330.60  | not significant |
| 10119 | PLEKHF2    | 1.03 | 2.05E-01 | 4.70E-01 | 1113.63  | not significant |
| 10120 | SIAH1      | 1.03 | 2.09E-01 | 4.73E-01 | 653.75   | not significant |
| 10121 | NDUFA1     | 1.03 | 2.06E-01 | 4.71E-01 | 1933.95  | not significant |
| 10122 | C5orf56    | 1.03 | 1.91E-01 | 4.51E-01 | 1012.98  | not significant |
| 10123 | LINS       | 1.03 | 1.89E-01 | 4.49E-01 | 407.93   | not significant |
| 10124 | PLXNB1     | 1.03 | 8.20E-02 | 2.71E-01 | 125.13   | not significant |
| 10125 | WHAMMP1    | 1.03 | 3.82E-02 | NA       | 77.67    | not significant |
| 10126 | FOXB1      | 1.03 | 1.05E-02 | NA       | 48.33    | not significant |
| 10127 | JARID2     | 1.03 | 1.46E-01 | 3.90E-01 | 4920.94  | not significant |
| 10128 | AGBL5      | 1.03 | 2.06E-01 | 4.71E-01 | 1286.38  | not significant |
| 10129 | NBEAL2     | 1.03 | 1.95E-01 | 4.57E-01 | 7920.26  | not significant |
| 10130 | DENND1C    | 1.03 | 1.56E-01 | 4.04E-01 | 3098.35  | not significant |
| 10131 | PEX5L      | 1.03 | 1.86E-01 | 4.44E-01 | 3169.61  | not significant |
| 10132 | PPP1R2     | 1.03 | 2.04E-01 | 4.69E-01 | 1228.37  | not significant |
| 10133 | RPS8       | 1.03 | 1.84E-01 | 4.42E-01 | 26346.55 | not significant |
| 10134 | GLTSCR1    | 1.03 | 2.05E-01 | 4.70E-01 | 596.85   | not significant |
| 10135 | TMEM256    | 1.03 | 1.59E-01 | 4.09E-01 | 260.22   | not significant |
| 10136 | LEMD3      | 1.03 | 1.71E-01 | 4.25E-01 | 2256.58  | not significant |
| 10137 | MIDN       | 1.03 | 1.65E-01 | 4.16E-01 | 2910.28  | not significant |
| 10138 | DEGS1      | 1.03 | 1.70E-01 | 4.24E-01 | 2264.12  | not significant |
| 10139 | PARP6      | 1.03 | 2.05E-01 | 4.70E-01 | 1042.70  | not significant |
| 10140 | RIT1       | 1.03 | 2.09E-01 | 4.74E-01 | 886.60   | not significant |
| 10141 | GLIPR2     | 1.03 | 1.45E-01 | 3.89E-01 | 227.33   | not significant |
| 10142 | IER3IP1    | 1.03 | 1.89E-01 | 4.48E-01 | 2028.68  | not significant |
| 10143 | DPYSL2     | 1.03 | 1.36E-01 | 3.73E-01 | 3366.72  | not significant |
| 10144 | TWF2       | 1.03 | 1.83E-01 | 4.40E-01 | 3251.54  | not significant |
| 10145 | WRAP73     | 1.03 | 1.98E-01 | 4.62E-01 | 1234.63  | not significant |
| 10146 | SLC19A1    | 1.03 | 1.94E-01 | 4.55E-01 | 2020.50  | not significant |
| 10147 | MMD        | 1.03 | 1.81E-01 | 4.39E-01 | 1845.18  | not significant |
| 10148 | YIPF1      | 1.03 | 2.01E-01 | 4.65E-01 | 836.34   | not significant |
| 10149 | KIAA1468   | 1.03 | 2.35E-01 | 5.02E-01 | 1026.75  | not significant |
| 10150 | PAAF1      | 1.03 | 2.03E-01 | 4.67E-01 | 621.51   | not significant |
| 10151 | ZNF519     | 1.03 | 1.66E-01 | 4.19E-01 | 406.52   | not significant |
| 10152 | FBXL19-AS1 | 1.03 | 3.87E-02 | NA       | 99.89    | not significant |
| 10153 | GDPD5      | 1.03 | 2.02E-01 | 4.67E-01 | 1192.92  | not significant |
| 10154 | RBM5       | 1.03 | 1.53E-01 | 4.01E-01 | 3106.01  | not significant |
| 10155 | STIL       | 1.03 | 1.80E-01 | 4.37E-01 | 2694.95  | not significant |
| 10156 | IFIT3      | 1.03 | 1.94E-01 | 4.56E-01 | 490.31   | not significant |
| 10157 | PWWP2B     | 1.03 | 1.95E-01 | 4.57E-01 | 503.19   | not significant |
| 10158 | IFT140     | 1.03 | 1.83E-01 | 4.40E-01 | 492.04   | not significant |
| 10159 | UGT3A2     | 1.03 | 5.29E-02 | NA       | 99.73    | not significant |
| 10160 | SSR4       | 1.03 | 1.73E-01 | 4.28E-01 | 3012.14  | not significant |
| 10161 | PPP3CC     | 1.03 | 2.01E-01 | 4.65E-01 | 822.66   | not significant |
| 10162 | KCTD1      | 1.03 | 1.94E-01 | 4.55E-01 | 745.26   | not significant |
| 10163 | TGFBR2     | 1.03 | 2.01E-01 | 4.65E-01 | 861.10   | not significant |
| 10164 | ZBTB42     | 1.03 | 1.52E-01 | 3.99E-01 | 251.65   | not significant |
| 10165 | SWSAP1     | 1.03 | 9.40E-02 | 2.96E-01 | 144.90   | not significant |
| 10166 | TNRC18     | 1.03 | 1.39E-01 | 3.79E-01 | 5917.41  | not significant |
| 10167 | ALG1       | 1.03 | 1.96E-01 | 4.59E-01 | 1446.73  | not significant |
| 10168 | CENPT      | 1.03 | 1.97E-01 | 4.60E-01 | 1589.78  | not significant |
| 10169 | GOLGA1     | 1.03 | 1.93E-01 | 4.54E-01 | 515.27   | not significant |
| 10170 | ZNF862     | 1.03 | 1.82E-01 | 4.39E-01 | 476.87   | not significant |
| 10171 | ZNF628     | 1.03 | 1.69E-01 | 4.22E-01 | 337.66   | not significant |
| 10172 | CTNNBIP1   | 1.03 | 2.01E-01 | 4.65E-01 | 709.70   | not significant |
| 10173 | ZNF345     | 1.03 | 1.01E-01 | 3.09E-01 | 157.39   | not significant |
| 10174 | MCM8       | 1.03 | 1.47E-01 | 3.91E-01 | 4067.04  | not significant |
| 10175 | BRD1       | 1.03 | 1.69E-01 | 4.23E-01 | 2868.67  | not significant |
| 10176 | ACP2       | 1.03 | 2.01E-01 | 4.65E-01 | 750.50   | not significant |
| 10177 | ARHGEF2    | 1.03 | 1.28E-01 | 3.59E-01 | 3452.64  | not significant |
| 10178 | ATP11C     | 1.03 | 1.95E-01 | 4.57E-01 | 1577.28  | not significant |
| 10179 | MIA3       | 1.03 | 1.71E-01 | 4.25E-01 | 2480.69  | not significant |
| 10180 | LRRC1      | 1.03 | 1.85E-01 | 4.44E-01 | 457.80   | not significant |
| 10181 | COPG2      | 1.03 | 1.82E-01 | 4.40E-01 | 428.31   | not significant |
| 10182 | FLJ37453   | 1.03 | 9.07E-02 | 2.88E-01 | 140.54   | not significant |
| 10183 | PRDX5      | 1.03 | 1.62E-01 | 4.13E-01 | 4521.16  | not significant |
| 10184 | LMO7       | 1.03 | 1.60E-01 | 4.09E-01 | 350.53   | not significant |
| 10185 | CSNK1G2    | 1.03 | 1.00E-01 | 3.09E-01 | 5603.79  | not significant |
| 10186 | PRKAB1     | 1.03 | 1.42E-01 | 3.84E-01 | 3012.09  | not significant |
| 10187 | PCYT2      | 1.03 | 1.65E-01 | 4.17E-01 | 2119.11  | not significant |
| 10188 | FAM134C    | 1.03 | 1.82E-01 | 4.40E-01 | 1440.87  | not significant |
| 10189 | LOC145783  | 1.03 | 1.17E-01 | 3.39E-01 | 189.36   | not significant |
| 10190 | LINC01061  | 1.03 | 6.27E-02 | 2.28E-01 | 110.47   | not significant |
| 10191 | OCIAD1     | 1.03 | 1.17E-01 | 3.39E-01 | 4494.19  | not significant |
| 10192 | HNRNPLL    | 1.03 | 1.42E-01 | 3.83E-01 | 2898.55  | not significant |
| 10193 | AGPAT2     | 1.03 | 1.77E-01 | 4.33E-01 | 428.62   | not significant |
| 10194 | MXRA7      | 1.03 | 1.23E-01 | 3.51E-01 | 201.51   | not significant |
| 10195 | MGAT4B     | 1.03 | 1.87E-01 | 4.46E-01 | 1203.13  | not significant |

|       |              |      |          |          |          |                 |
|-------|--------------|------|----------|----------|----------|-----------------|
| 10196 | PHIP         | 1.03 | 1.70E-01 | 4.25E-01 | 4089.90  | not significant |
| 10197 | PDCL         | 1.03 | 1.88E-01 | 4.48E-01 | 943.80   | not significant |
| 10198 | GLUD1P3      | 1.03 | 3.08E-02 | NA       | 78.61    | not significant |
| 10199 | GINS4        | 1.03 | 1.44E-01 | 3.88E-01 | 2499.96  | not significant |
| 10200 | ANAPC13      | 1.03 | 1.81E-01 | 4.39E-01 | 1585.24  | not significant |
| 10201 | ATG2A        | 1.03 | 1.90E-01 | 4.49E-01 | 1051.81  | not significant |
| 10202 | LOC100505549 | 1.03 | 1.55E-01 | 4.03E-01 | 298.44   | not significant |
| 10203 | NDUFB9       | 1.03 | 1.42E-01 | 3.84E-01 | 4395.81  | not significant |
| 10204 | XAB2         | 1.03 | 1.40E-01 | 3.81E-01 | 2535.75  | not significant |
| 10205 | MITD1        | 1.03 | 1.84E-01 | 4.42E-01 | 860.61   | not significant |
| 10206 | C22orf29     | 1.03 | 1.47E-01 | 3.92E-01 | 2578.82  | not significant |
| 10207 | UBE2B        | 1.03 | 1.80E-01 | 4.37E-01 | 1778.91  | not significant |
| 10208 | ZNF738       | 1.03 | 1.76E-01 | 4.31E-01 | 1304.94  | not significant |
| 10209 | UBXN4        | 1.03 | 8.72E-02 | 2.82E-01 | 7338.26  | not significant |
| 10210 | LGALS3BP     | 1.03 | 8.87E-02 | 2.85E-01 | 10597.73 | not significant |
| 10211 | HEXB         | 1.03 | 1.65E-01 | 4.16E-01 | 1662.35  | not significant |
| 10212 | SCAMP4       | 1.03 | 1.70E-01 | 4.24E-01 | 1967.84  | not significant |
| 10213 | NRDE2        | 1.03 | 1.79E-01 | 4.36E-01 | 624.80   | not significant |
| 10214 | LINC00667    | 1.03 | 1.86E-01 | 4.44E-01 | 710.61   | not significant |
| 10215 | PRKAR1B      | 1.03 | 1.62E-01 | 4.12E-01 | 3735.23  | not significant |
| 10216 | TSC2D4       | 1.03 | 1.41E-01 | 3.83E-01 | 2732.77  | not significant |
| 10217 | LLGL1        | 1.03 | 1.57E-01 | 4.05E-01 | 2073.54  | not significant |
| 10218 | ZSWIM7       | 1.03 | 1.84E-01 | 4.42E-01 | 558.38   | not significant |
| 10219 | REFE         | 1.03 | 1.82E-01 | 4.39E-01 | 1413.42  | not significant |
| 10220 | LPGAT1       | 1.03 | 1.68E-01 | 4.21E-01 | 978.76   | not significant |
| 10221 | C14orf28     | 1.03 | 4.62E-02 | NA       | 94.24    | not significant |
| 10222 | PDHB         | 1.03 | 1.44E-01 | 3.88E-01 | 2583.99  | not significant |
| 10223 | SNHG8        | 1.03 | 1.81E-01 | 4.38E-01 | 2125.60  | not significant |
| 10224 | GLG1         | 1.03 | 1.60E-01 | 4.09E-01 | 3104.03  | not significant |
| 10225 | HAUS3        | 1.03 | 1.73E-01 | 4.27E-01 | 1349.44  | not significant |
| 10226 | RBM12B       | 1.03 | 1.75E-01 | 4.30E-01 | 1633.56  | not significant |
| 10227 | SDF4         | 1.03 | 1.57E-01 | 4.05E-01 | 3467.68  | not significant |
| 10228 | ALKBH6       | 1.03 | 1.72E-01 | 4.26E-01 | 482.62   | not significant |
| 10229 | RPL35A       | 1.03 | 1.47E-01 | 3.92E-01 | 9336.61  | not significant |
| 10230 | TBC1D1       | 1.03 | 1.20E-01 | 3.45E-01 | 3583.86  | not significant |
| 10231 | PIGS         | 1.03 | 1.74E-01 | 4.28E-01 | 1623.28  | not significant |
| 10232 | UBR2         | 1.03 | 1.76E-01 | 4.31E-01 | 2205.25  | not significant |
| 10233 | FUZ          | 1.03 | 1.80E-01 | 4.36E-01 | 811.32   | not significant |
| 10234 | DOPEY1       | 1.03 | 1.80E-01 | 4.37E-01 | 900.53   | not significant |
| 10235 | MAML3        | 1.03 | 1.79E-01 | 4.36E-01 | 586.80   | not significant |
| 10236 | ORC6         | 1.03 | 1.45E-01 | 3.90E-01 | 2182.68  | not significant |
| 10237 | BRCA1        | 1.03 | 1.46E-01 | 3.90E-01 | 3955.72  | not significant |
| 10238 | CRY1         | 1.03 | 1.52E-01 | 4.00E-01 | 2077.50  | not significant |
| 10239 | FBF1         | 1.03 | 1.78E-01 | 4.35E-01 | 932.23   | not significant |
| 10240 | CCDC136      | 1.03 | 1.66E-01 | 4.18E-01 | 628.38   | not significant |
| 10241 | KCTD19       | 1.03 | 4.15E-02 | NA       | 89.97    | not significant |
| 10242 | RLTPR        | 1.03 | 6.62E-02 | 2.36E-01 | 9148.05  | not significant |
| 10243 | RNF123       | 1.03 | 1.67E-01 | 4.20E-01 | 1392.49  | not significant |
| 10244 | FIS1         | 1.03 | 1.77E-01 | 4.33E-01 | 1817.45  | not significant |
| 10245 | RPS20        | 1.03 | 1.36E-01 | 3.73E-01 | 15205.75 | not significant |
| 10246 | BAX          | 1.03 | 1.33E-01 | 3.68E-01 | 3126.48  | not significant |
| 10247 | LIPA         | 1.03 | 1.32E-01 | 3.67E-01 | 2575.17  | not significant |
| 10248 | KCNA3        | 1.03 | 1.63E-01 | 4.14E-01 | 2629.22  | not significant |
| 10249 | FBXO11       | 1.03 | 1.38E-01 | 3.76E-01 | 2129.04  | not significant |
| 10250 | KIAA0368     | 1.03 | 1.52E-01 | 3.99E-01 | 3073.25  | not significant |
| 10251 | DRAM2        | 1.03 | 1.76E-01 | 4.31E-01 | 849.37   | not significant |
| 10252 | RASSF7       | 1.03 | 1.46E-01 | 3.91E-01 | 358.65   | not significant |
| 10253 | CHRAC1       | 1.03 | 1.26E-01 | 3.56E-01 | 3336.93  | not significant |
| 10254 | HMG20B       | 1.03 | 1.71E-01 | 4.25E-01 | 1599.34  | not significant |
| 10255 | TBCK         | 1.03 | 1.75E-01 | 4.31E-01 | 800.50   | not significant |
| 10256 | C3orf58      | 1.03 | 1.75E-01 | 4.31E-01 | 660.40   | not significant |
| 10257 | AKT1         | 1.03 | 7.17E-02 | 2.49E-01 | 8610.25  | not significant |
| 10258 | BRI3         | 1.03 | 1.61E-01 | 4.11E-01 | 635.36   | not significant |
| 10259 | TRAPPC6A     | 1.03 | 1.20E-01 | 3.45E-01 | 254.27   | not significant |
| 10260 | HMHA1        | 1.03 | 6.30E-02 | 2.28E-01 | 8561.53  | not significant |
| 10261 | NEDD9        | 1.03 | 1.73E-01 | 4.27E-01 | 884.98   | not significant |
| 10262 | HMGN4        | 1.03 | 1.16E-01 | 3.38E-01 | 4250.12  | not significant |
| 10263 | BARD1        | 1.03 | 1.54E-01 | 4.02E-01 | 1710.35  | not significant |
| 10264 | RPS6         | 1.03 | 1.96E-01 | 4.59E-01 | 48098.96 | not significant |
| 10265 | NCK2         | 1.03 | 1.71E-01 | 4.25E-01 | 951.03   | not significant |
| 10266 | TM2D1        | 1.03 | 1.68E-01 | 4.21E-01 | 455.66   | not significant |
| 10267 | STOML1       | 1.03 | 1.33E-01 | 3.68E-01 | 274.59   | not significant |
| 10268 | CHFR         | 1.03 | 9.05E-02 | 2.88E-01 | 4531.80  | not significant |
| 10269 | MRPL34       | 1.03 | 1.70E-01 | 4.23E-01 | 1858.36  | not significant |
| 10270 | UROD         | 1.03 | 1.76E-01 | 4.32E-01 | 1008.38  | not significant |
| 10271 | TMEM205      | 1.03 | 1.71E-01 | 4.25E-01 | 805.38   | not significant |
| 10272 | DNTT         | 1.03 | 1.76E-01 | 4.32E-01 | 838.65   | not significant |
| 10273 | C21orf2      | 1.03 | 1.57E-01 | 4.05E-01 | 442.69   | not significant |
| 10274 | FBXL20       | 1.03 | 1.71E-01 | 4.25E-01 | 596.06   | not significant |
| 10275 | LOC374443    | 1.03 | 6.30E-02 | 2.28E-01 | 121.44   | not significant |
| 10276 | 43723_1041   | 1.03 | 1.00E-01 | 3.09E-01 | 6782.44  | not significant |
| 10277 | ZNF33A       | 1.03 | 1.54E-01 | 4.02E-01 | 1970.99  | not significant |
| 10278 | C19orf43     | 1.03 | 1.26E-01 | 3.56E-01 | 5744.44  | not significant |
| 10279 | USO1         | 1.03 | 1.22E-01 | 3.49E-01 | 2851.28  | not significant |
| 10280 | FLT4         | 1.03 | 1.61E-01 | 4.11E-01 | 1403.77  | not significant |
| 10281 | B4GALT3      | 1.03 | 1.67E-01 | 4.20E-01 | 1223.79  | not significant |
| 10282 | PLA2G12A     | 1.03 | 1.58E-01 | 4.06E-01 | 429.51   | not significant |
| 10283 | ADCY3        | 1.03 | 1.39E-01 | 3.78E-01 | 2133.90  | not significant |



|       |             |      |          |          |          |                 |
|-------|-------------|------|----------|----------|----------|-----------------|
| 10284 | MAN1B1      | 1.03 | 1.65E-01 | 4.16E-01 | 771.54   | not significant |
| 10285 | CHRNA1      | 1.03 | 1.51E-01 | 3.98E-01 | 383.52   | not significant |
| 10286 | C1orf159    | 1.03 | 1.67E-01 | 4.20E-01 | 527.52   | not significant |
| 10287 | TMEM67      | 1.03 | 1.11E-01 | 3.28E-01 | 373.57   | not significant |
| 10288 | RGS10       | 1.03 | 1.51E-01 | 3.99E-01 | 2677.40  | not significant |
| 10289 | RAD51       | 1.03 | 1.84E-01 | 4.42E-01 | 1519.85  | not significant |
| 10290 | PEX10       | 1.03 | 1.56E-01 | 4.04E-01 | 576.67   | not significant |
| 10291 | TGFB1       | 1.03 | 1.40E-01 | 3.81E-01 | 3068.24  | not significant |
| 10292 | BRD8        | 1.03 | 1.41E-01 | 3.82E-01 | 2261.58  | not significant |
| 10293 | PIK3R6      | 1.03 | 1.86E-01 | 4.44E-01 | 417.53   | not significant |
| 10294 | ECSIT       | 1.03 | 1.71E-01 | 4.25E-01 | 983.20   | not significant |
| 10295 | TMEM132D    | 1.03 | 1.50E-01 | 3.97E-01 | 387.31   | not significant |
| 10296 | BBS1        | 1.03 | 1.33E-01 | 3.68E-01 | 319.07   | not significant |
| 10297 | MESDC1      | 1.03 | 1.27E-01 | 3.58E-01 | 3062.80  | not significant |
| 10298 | ZNF131      | 1.03 | 1.26E-01 | 3.55E-01 | 2120.01  | not significant |
| 10299 | GLB1        | 1.03 | 1.61E-01 | 4.11E-01 | 1324.64  | not significant |
| 10300 | HILPDA      | 1.03 | 1.70E-01 | 4.24E-01 | 891.90   | not significant |
| 10301 | EFNA4       | 1.03 | 4.52E-02 | NA       | 99.45    | not significant |
| 10302 | FAM96A      | 1.03 | 1.63E-01 | 4.14E-01 | 1355.36  | not significant |
| 10303 | PEMT        | 1.03 | 1.66E-01 | 4.19E-01 | 815.88   | not significant |
| 10304 | ELMO1       | 1.03 | 6.03E-02 | 2.22E-01 | 10461.96 | not significant |
| 10305 | TMEM9       | 1.03 | 1.70E-01 | 4.23E-01 | 835.77   | not significant |
| 10306 | TBC1D19     | 1.03 | 1.25E-01 | 3.54E-01 | 265.26   | not significant |
| 10307 | FAM98C      | 1.03 | 9.32E-02 | 2.94E-01 | 176.25   | not significant |
| 10308 | SUPT7L      | 1.03 | 1.44E-01 | 3.86E-01 | 1877.28  | not significant |
| 10309 | MASTL       | 1.03 | 1.49E-01 | 3.95E-01 | 1793.15  | not significant |
| 10310 | COX18       | 1.03 | 1.66E-01 | 4.18E-01 | 654.47   | not significant |
| 10311 | ZNF622      | 1.03 | 1.62E-01 | 4.13E-01 | 1033.84  | not significant |
| 10312 | NUP210      | 1.03 | 1.84E-01 | 4.42E-01 | 20016.98 | not significant |
| 10313 | ZDHHC8      | 1.03 | 1.46E-01 | 3.91E-01 | 1951.68  | not significant |
| 10314 | KAT8        | 1.03 | 1.55E-01 | 4.03E-01 | 1280.05  | not significant |
| 10315 | ALCAM       | 1.03 | 1.63E-01 | 4.13E-01 | 971.25   | not significant |
| 10316 | FAM135A     | 1.03 | 1.84E-01 | 4.42E-01 | 437.65   | not significant |
| 10317 | AKIP1       | 1.03 | 1.53E-01 | 4.01E-01 | 538.05   | not significant |
| 10318 | PRAF2       | 1.03 | 1.17E-01 | 3.40E-01 | 240.11   | not significant |
| 10319 | IL23A       | 1.03 | 4.66E-02 | 1.87E-01 | 105.59   | not significant |
| 10320 | GOLGA8A     | 1.03 | 5.72E-02 | 2.15E-01 | 639.59   | not significant |
| 10321 | D2HGDH      | 1.03 | 1.62E-01 | 4.12E-01 | 520.01   | not significant |
| 10322 | RNF220      | 1.03 | 1.10E-01 | 3.27E-01 | 2841.88  | not significant |
| 10323 | ZNF384      | 1.03 | 1.31E-01 | 3.64E-01 | 2771.27  | not significant |
| 10324 | HINFP       | 1.03 | 1.62E-01 | 4.13E-01 | 653.88   | not significant |
| 10325 | PPIEL       | 1.03 | 7.76E-02 | 2.61E-01 | 167.61   | not significant |
| 10326 | SLC30A5     | 1.03 | 9.96E-02 | 3.08E-01 | 3467.30  | not significant |
| 10327 | NOL4L       | 1.03 | 1.57E-01 | 4.05E-01 | 1940.97  | not significant |
| 10328 | PPIL4       | 1.03 | 1.54E-01 | 4.02E-01 | 831.99   | not significant |
| 10329 | MSH6        | 1.03 | 8.05E-02 | 2.68E-01 | 5348.83  | not significant |
| 10330 | HIATL1      | 1.03 | 1.06E-01 | 3.20E-01 | 3447.49  | not significant |
| 10331 | STUB1       | 1.03 | 1.50E-01 | 3.97E-01 | 2171.60  | not significant |
| 10332 | ZGPAT       | 1.03 | 1.57E-01 | 4.05E-01 | 1167.76  | not significant |
| 10333 | PIP5K1C     | 1.03 | 1.55E-01 | 4.03E-01 | 1078.66  | not significant |
| 10334 | TBC1D10B    | 1.03 | 1.09E-01 | 3.26E-01 | 2938.79  | not significant |
| 10335 | POGZ        | 1.03 | 1.26E-01 | 3.56E-01 | 3542.79  | not significant |
| 10336 | VAMP1       | 1.03 | 1.59E-01 | 4.07E-01 | 991.25   | not significant |
| 10337 | PPP1R9B     | 1.03 | 1.10E-01 | 3.27E-01 | 2553.72  | not significant |
| 10338 | CAMK2G      | 1.03 | 1.29E-01 | 3.62E-01 | 1971.25  | not significant |
| 10339 | TXLNGY      | 1.03 | 1.13E-01 | 3.32E-01 | 4685.56  | not significant |
| 10340 | ATR         | 1.03 | 1.38E-01 | 3.77E-01 | 1961.13  | not significant |
| 10341 | HOXB2       | 1.03 | 3.43E-01 | 6.09E-01 | 447.80   | not significant |
| 10342 | NLR5        | 1.03 | 1.40E-01 | 3.81E-01 | 1761.56  | not significant |
| 10343 | CBS         | 1.03 | 1.54E-01 | 4.03E-01 | 1207.60  | not significant |
| 10344 | B4GALT1     | 1.03 | 1.49E-01 | 3.95E-01 | 1269.28  | not significant |
| 10345 | CRELD1      | 1.03 | 1.14E-01 | 3.35E-01 | 286.85   | not significant |
| 10346 | STX16       | 1.03 | 1.28E-01 | 3.60E-01 | 2733.87  | not significant |
| 10347 | SPTLC2      | 1.03 | 1.34E-01 | 3.69E-01 | 2952.97  | not significant |
| 10348 | TMEM87A     | 1.03 | 1.20E-01 | 3.45E-01 | 2104.73  | not significant |
| 10349 | LRCH4       | 1.03 | 9.96E-02 | 3.08E-01 | 3238.44  | not significant |
| 10350 | DRAP1       | 1.03 | 1.33E-01 | 3.67E-01 | 3366.58  | not significant |
| 10351 | CDKN2C      | 1.03 | 1.43E-01 | 3.85E-01 | 1689.96  | not significant |
| 10352 | CCDC88C     | 1.03 | 1.04E-01 | 3.15E-01 | 4669.66  | not significant |
| 10353 | SVIP        | 1.03 | 1.54E-01 | 4.02E-01 | 1026.43  | not significant |
| 10354 | KIAA1715    | 1.03 | 1.24E-01 | 3.53E-01 | 2294.03  | not significant |
| 10355 | ZSCAN16-AS1 | 1.03 | 5.41E-02 | 2.08E-01 | 131.57   | not significant |
| 10356 | S100P       | 1.03 | 1.14E-02 | NA       | 61.33    | not significant |
| 10357 | RNF168      | 1.03 | 1.18E-01 | 3.40E-01 | 2505.48  | not significant |
| 10358 | POLE        | 1.03 | 1.92E-01 | 4.52E-01 | 11151.14 | not significant |
| 10359 | TMEM87B     | 1.03 | 1.50E-01 | 3.97E-01 | 1103.83  | not significant |
| 10360 | PCGF6       | 1.03 | 1.45E-01 | 3.90E-01 | 513.88   | not significant |
| 10361 | ELOVL6      | 1.03 | 1.54E-01 | 4.02E-01 | 1069.79  | not significant |
| 10362 | BCL11A      | 1.03 | 1.52E-01 | 3.99E-01 | 718.63   | not significant |
| 10363 | TXNDC15     | 1.03 | 1.38E-01 | 3.78E-01 | 1392.15  | not significant |
| 10364 | CEP290      | 1.03 | 1.51E-01 | 3.98E-01 | 1052.77  | not significant |
| 10365 | PPP1R37     | 1.03 | 1.51E-01 | 3.99E-01 | 889.82   | not significant |
| 10366 | AGAP2       | 1.03 | 8.93E-02 | 2.86E-01 | 4309.02  | not significant |
| 10367 | LUC7L3      | 1.03 | 9.51E-02 | 2.98E-01 | 4911.21  | not significant |
| 10368 | POLD3       | 1.03 | 1.12E-01 | 3.31E-01 | 2425.75  | not significant |
| 10369 | ZNF217      | 1.03 | 1.22E-01 | 3.50E-01 | 2716.06  | not significant |
| 10370 | VPS13C      | 1.03 | 1.20E-01 | 3.45E-01 | 4079.73  | not significant |
| 10371 | EID1        | 1.03 | 9.29E-02 | 2.93E-01 | 4244.07  | not significant |

|       |           |      |          |          |          |                 |
|-------|-----------|------|----------|----------|----------|-----------------|
| 10372 | SYVN1     | 1.03 | 1.38E-01 | 3.77E-01 | 2039.01  | not significant |
| 10373 | PHLDB3    | 1.03 | 8.76E-02 | 2.83E-01 | 187.15   | not significant |
| 10374 | HHAT      | 1.03 | 2.95E-02 | NA       | 86.47    | not significant |
| 10375 | SPIDR     | 1.03 | 1.30E-01 | 3.62E-01 | 1747.09  | not significant |
| 10376 | EMB       | 1.03 | 1.10E-01 | 3.27E-01 | 3533.71  | not significant |
| 10377 | NOD1      | 1.03 | 1.48E-01 | 3.94E-01 | 930.45   | not significant |
| 10378 | MRPL54    | 1.03 | 1.54E-01 | 4.02E-01 | 901.19   | not significant |
| 10379 | RNF215    | 1.03 | 7.10E-02 | 2.47E-01 | 150.77   | not significant |
| 10380 | DONSON    | 1.03 | 1.36E-01 | 3.74E-01 | 1536.60  | not significant |
| 10381 | QTRT1     | 1.03 | 1.45E-01 | 3.89E-01 | 1347.22  | not significant |
| 10382 | LUC7L2    | 1.03 | 1.51E-01 | 3.98E-01 | 733.47   | not significant |
| 10383 | AEBP1     | 1.03 | 6.08E-02 | 2.23E-01 | 32837.74 | not significant |
| 10384 | FPGS      | 1.03 | 1.30E-01 | 3.62E-01 | 1758.26  | not significant |
| 10385 | IL18BP    | 1.03 | 1.50E-01 | 3.97E-01 | 662.17   | not significant |
| 10386 | PAWR      | 1.03 | 1.49E-01 | 3.96E-01 | 686.49   | not significant |
| 10387 | ASH2L     | 1.03 | 9.71E-02 | 3.02E-01 | 3064.45  | not significant |
| 10388 | TBC1D10A  | 1.03 | 1.45E-01 | 3.89E-01 | 1484.28  | not significant |
| 10389 | TMEM161B  | 1.03 | 1.50E-01 | 3.97E-01 | 879.86   | not significant |
| 10390 | EMID1     | 1.03 | 1.50E-01 | 3.97E-01 | 929.11   | not significant |
| 10391 | MED12     | 1.03 | 1.25E-01 | 3.54E-01 | 3135.66  | not significant |
| 10392 | USP30     | 1.03 | 1.49E-01 | 3.96E-01 | 754.18   | not significant |
| 10393 | PGPEP1    | 1.03 | 1.46E-01 | 3.91E-01 | 1031.80  | not significant |
| 10394 | SMAD3     | 1.03 | 1.40E-01 | 3.81E-01 | 549.40   | not significant |
| 10395 | ERN1      | 1.03 | 1.14E-01 | 3.34E-01 | 1521.46  | not significant |
| 10396 | SIN3A     | 1.03 | 9.36E-02 | 2.95E-01 | 4287.09  | not significant |
| 10397 | ASB13     | 1.03 | 1.45E-01 | 3.90E-01 | 502.17   | not significant |
| 10398 | APLN      | 1.03 | 1.28E-01 | 3.59E-01 | 1770.80  | not significant |
| 10399 | ARAF      | 1.03 | 1.15E-01 | 3.36E-01 | 2057.62  | not significant |
| 10400 | SHARPIN   | 1.03 | 1.42E-01 | 3.84E-01 | 1105.08  | not significant |
| 10401 | OSGIN2    | 1.03 | 1.37E-01 | 3.75E-01 | 1370.28  | not significant |
| 10402 | JRKL      | 1.03 | 1.49E-01 | 3.95E-01 | 850.46   | not significant |
| 10403 | UOCC2     | 1.03 | 1.48E-01 | 3.95E-01 | 1061.31  | not significant |
| 10404 | GPR137    | 1.03 | 1.38E-01 | 3.77E-01 | 866.62   | not significant |
| 10405 | WNT3      | 1.03 | 1.20E-01 | 3.45E-01 | 314.83   | not significant |
| 10406 | TRPC4AP   | 1.03 | 8.89E-02 | 2.85E-01 | 4492.32  | not significant |
| 10407 | ZNF395    | 1.03 | 9.75E-02 | 3.03E-01 | 2584.47  | not significant |
| 10408 | OXR1      | 1.03 | 1.26E-01 | 3.56E-01 | 1486.00  | not significant |
| 10409 | HES4      | 1.03 | 1.46E-01 | 3.90E-01 | 720.31   | not significant |
| 10410 | STX7      | 1.03 | 1.46E-01 | 3.90E-01 | 626.78   | not significant |
| 10411 | PACRGL    | 1.03 | 1.31E-01 | 3.65E-01 | 388.78   | not significant |
| 10412 | VMP1      | 1.03 | 9.07E-02 | 2.88E-01 | 3539.81  | not significant |
| 10413 | YEATS2    | 1.03 | 8.78E-02 | 2.83E-01 | 4564.13  | not significant |
| 10414 | C6orf1    | 1.03 | 1.35E-01 | 3.71E-01 | 406.11   | not significant |
| 10415 | NS3BP     | 1.03 | 6.84E-03 | NA       | 53.48    | not significant |
| 10416 | CDC42SE2  | 1.03 | 4.47E-02 | 1.83E-01 | 8990.95  | not significant |
| 10417 | E2F2      | 1.03 | 7.80E-02 | 2.62E-01 | 3788.36  | not significant |
| 10418 | CDK16     | 1.03 | 1.25E-01 | 3.54E-01 | 1918.01  | not significant |
| 10419 | PACS2     | 1.03 | 1.26E-01 | 3.56E-01 | 380.51   | not significant |
| 10420 | RPL10     | 1.03 | 1.06E-01 | 3.20E-01 | 8520.13  | not significant |
| 10421 | MYO9B     | 1.03 | 7.35E-02 | 2.53E-01 | 6808.19  | not significant |
| 10422 | PIGL      | 1.03 | 1.01E-01 | 3.09E-01 | 254.03   | not significant |
| 10423 | CCNI      | 1.03 | 6.70E-02 | 2.38E-01 | 9010.84  | not significant |
| 10424 | ATP1B3    | 1.03 | 5.92E-02 | 2.20E-01 | 5359.63  | not significant |
| 10425 | ATP2A3    | 1.03 | 5.15E-02 | 2.01E-01 | 12573.74 | not significant |
| 10426 | STARD3NL  | 1.03 | 1.00E-01 | 3.09E-01 | 2457.27  | not significant |
| 10427 | MAPK3     | 1.03 | 1.03E-01 | 3.13E-01 | 2190.12  | not significant |
| 10428 | PDXP      | 1.03 | 1.03E-01 | 3.14E-01 | 2523.54  | not significant |
| 10429 | MADD      | 1.03 | 9.83E-02 | 3.05E-01 | 2635.59  | not significant |
| 10430 | BEX4      | 1.03 | 1.20E-01 | 3.45E-01 | 1743.94  | not significant |
| 10431 | SPCS2     | 1.03 | 1.29E-01 | 3.60E-01 | 1541.05  | not significant |
| 10432 | CYTH1     | 1.03 | 4.90E-02 | 1.94E-01 | 6712.71  | not significant |
| 10433 | SORBS3    | 1.03 | 1.35E-01 | 3.72E-01 | 1454.15  | not significant |
| 10434 | RPS24     | 1.03 | 1.64E-01 | 4.16E-01 | 13143.91 | not significant |
| 10435 | ATL3      | 1.03 | 5.86E-02 | 2.18E-01 | 5059.61  | not significant |
| 10436 | RAB33B    | 1.03 | 1.39E-01 | 3.79E-01 | 513.29   | not significant |
| 10437 | TOR1AIP1  | 1.03 | 7.72E-02 | 2.60E-01 | 3729.60  | not significant |
| 10438 | CERS5     | 1.03 | 1.03E-01 | 3.14E-01 | 1931.95  | not significant |
| 10439 | MXD1      | 1.03 | 1.07E-01 | 3.21E-01 | 267.85   | not significant |
| 10440 | HES6      | 1.03 | 7.13E-02 | 2.48E-01 | 197.47   | not significant |
| 10441 | LINC01436 | 1.03 | 1.85E-02 | NA       | 79.43    | not significant |
| 10442 | PRPSAP1   | 1.03 | 1.14E-01 | 3.34E-01 | 1928.04  | not significant |
| 10443 | PDCD7     | 1.03 | 1.07E-01 | 3.21E-01 | 2415.53  | not significant |
| 10444 | ARL6IP5   | 1.03 | 9.97E-02 | 3.08E-01 | 2091.72  | not significant |
| 10445 | ZNF787    | 1.03 | 1.35E-01 | 3.71E-01 | 1123.44  | not significant |
| 10446 | PDE8A     | 1.03 | 1.23E-01 | 3.52E-01 | 398.85   | not significant |
| 10447 | ENKD1     | 1.03 | 1.11E-01 | 3.29E-01 | 296.30   | not significant |
| 10448 | SPTA1     | 1.03 | 1.12E-01 | 3.31E-01 | 312.11   | not significant |
| 10449 | FLJ31306  | 1.03 | 1.29E-01 | 3.62E-01 | 1327.25  | not significant |
| 10450 | MFN1      | 1.03 | 1.25E-01 | 3.54E-01 | 800.96   | not significant |
| 10451 | TMEM230   | 1.04 | 7.41E-02 | 2.53E-01 | 3969.50  | not significant |
| 10452 | MUTYH     | 1.04 | 1.34E-01 | 3.69E-01 | 1296.78  | not significant |
| 10453 | PLXNA1    | 1.04 | 1.19E-01 | 3.44E-01 | 2329.69  | not significant |
| 10454 | PHPT1     | 1.04 | 1.35E-01 | 3.71E-01 | 1157.26  | not significant |
| 10455 | SCOC      | 1.04 | 1.03E-01 | 3.14E-01 | 2523.06  | not significant |
| 10456 | PSEN1     | 1.04 | 1.21E-01 | 3.47E-01 | 1859.23  | not significant |
| 10457 | B3GNTL1   | 1.04 | 1.28E-01 | 3.59E-01 | 450.95   | not significant |
| 10458 | COMMD4    | 1.04 | 1.40E-01 | 3.81E-01 | 942.96   | not significant |
| 10459 | IRF7      | 1.04 | 9.06E-02 | 2.88E-01 | 249.99   | not significant |

|       |           |      |          |          |          |                 |
|-------|-----------|------|----------|----------|----------|-----------------|
| 10460 | LOC202181 | 1.04 | 7.46E-02 | 2.55E-01 | 202.55   | not significant |
| 10461 | TMEM263   | 1.04 | 9.19E-01 | NA       | 11.72    | not significant |
| 10462 | ZCCHC7    | 1.04 | 1.34E-01 | 3.70E-01 | 833.66   | not significant |
| 10463 | C1orf86   | 1.04 | 1.36E-01 | 3.74E-01 | 1436.32  | not significant |
| 10464 | B4GALT4   | 1.04 | 1.30E-01 | 3.62E-01 | 509.97   | not significant |
| 10465 | RTP4      | 1.04 | 8.71E-02 | 2.82E-01 | 233.40   | not significant |
| 10466 | SEPLLG    | 1.04 | 6.09E-02 | 2.23E-01 | 5133.66  | not significant |
| 10467 | RCN1      | 1.04 | 1.32E-01 | 3.67E-01 | 1334.34  | not significant |
| 10468 | PHKA2     | 1.04 | 1.31E-01 | 3.65E-01 | 1438.91  | not significant |
| 10469 | LRP12     | 1.04 | 1.33E-01 | 3.67E-01 | 1107.22  | not significant |
| 10470 | PDE4A     | 1.04 | 5.41E-02 | 2.08E-01 | 137.86   | not significant |
| 10471 | GIMAP8    | 1.04 | 1.01E-01 | 3.09E-01 | 2232.58  | not significant |
| 10472 | TRABD     | 1.04 | 7.29E-02 | 2.51E-01 | 3478.74  | not significant |
| 10473 | CHST11    | 1.04 | 7.46E-02 | 2.54E-01 | 17064.36 | not significant |
| 10474 | PMS1      | 1.04 | 1.17E-01 | 3.38E-01 | 1541.75  | not significant |
| 10475 | DDX60     | 1.04 | 1.30E-01 | 3.62E-01 | 1126.95  | not significant |
| 10476 | GTPBP3    | 1.04 | 1.22E-01 | 3.50E-01 | 1503.78  | not significant |
| 10477 | ATXN7L2   | 1.04 | 1.52E-01 | 3.99E-01 | 440.44   | not significant |
| 10478 | NFATC2IP  | 1.04 | 1.08E-01 | 3.23E-01 | 3090.27  | not significant |
| 10479 | RHEB      | 1.04 | 1.23E-01 | 3.52E-01 | 1751.94  | not significant |
| 10480 | ZNF443    | 1.04 | 1.27E-01 | 3.58E-01 | 442.68   | not significant |
| 10481 | CD84      | 1.04 | 1.18E-01 | 3.40E-01 | 3413.27  | not significant |
| 10482 | SPNS1     | 1.04 | 1.12E-01 | 3.31E-01 | 1695.45  | not significant |
| 10483 | RAB40C    | 1.04 | 1.32E-01 | 3.66E-01 | 530.09   | not significant |
| 10484 | SLC25A36  | 1.04 | 8.15E-02 | 2.70E-01 | 3294.96  | not significant |
| 10485 | OSBPL5    | 1.04 | 1.08E-01 | 3.24E-01 | 1699.17  | not significant |
| 10486 | GOLT1B    | 1.04 | 1.10E-01 | 3.27E-01 | 1651.47  | not significant |
| 10487 | GPATCH3   | 1.04 | 1.33E-01 | 3.68E-01 | 569.25   | not significant |
| 10488 | ARHGAP32  | 1.04 | 1.27E-01 | 3.56E-01 | 1724.97  | not significant |
| 10489 | METTL21A  | 1.04 | 1.28E-01 | 3.59E-01 | 734.19   | not significant |
| 10490 | CDS2      | 1.04 | 7.29E-02 | 2.51E-01 | 3485.30  | not significant |
| 10491 | ACD       | 1.04 | 1.24E-01 | 3.52E-01 | 1203.40  | not significant |
| 10492 | MAP3K12   | 1.04 | 1.30E-01 | 3.63E-01 | 692.80   | not significant |
| 10493 | NT5M      | 1.04 | 8.97E-02 | 2.87E-01 | 264.39   | not significant |
| 10494 | WDFY2     | 1.04 | 1.30E-01 | 3.62E-01 | 624.94   | not significant |
| 10495 | ZNF428    | 1.04 | 1.21E-01 | 3.48E-01 | 1607.08  | not significant |
| 10496 | ABHD17B   | 1.04 | 1.05E-01 | 3.17E-01 | 1974.48  | not significant |
| 10497 | FOXN3     | 1.04 | 1.15E-01 | 3.35E-01 | 2896.61  | not significant |
| 10498 | SHKBP1    | 1.04 | 8.09E-02 | 2.69E-01 | 2667.07  | not significant |
| 10499 | ZBTB10    | 1.04 | 1.18E-01 | 3.42E-01 | 1058.26  | not significant |
| 10500 | PRKCQ-AS1 | 1.04 | 1.25E-01 | 3.54E-01 | 979.69   | not significant |
| 10501 | COL7A1    | 1.04 | 1.02E-01 | 3.11E-01 | 290.41   | not significant |
| 10502 | NCKAP1L   | 1.04 | 7.63E-02 | 2.58E-01 | 6065.50  | not significant |
| 10503 | TSPYL1    | 1.04 | 1.01E-01 | 3.09E-01 | 2017.82  | not significant |
| 10504 | SURF4     | 1.04 | 1.16E-01 | 3.37E-01 | 1042.51  | not significant |
| 10505 | LOH12CR1  | 1.04 | 9.87E-02 | 3.06E-01 | 257.54   | not significant |
| 10506 | RBM7      | 1.04 | 1.16E-01 | 3.38E-01 | 1177.87  | not significant |
| 10507 | TJAP1     | 1.04 | 1.15E-01 | 3.36E-01 | 1297.33  | not significant |
| 10508 | TSPAN33   | 1.04 | 1.28E-01 | 3.60E-01 | 736.06   | not significant |
| 10509 | DALRD3    | 1.04 | 1.16E-01 | 3.37E-01 | 364.91   | not significant |
| 10510 | TMEM173   | 1.04 | 1.21E-01 | 3.47E-01 | 1175.02  | not significant |
| 10511 | MAN2A1    | 1.04 | 1.10E-01 | 3.27E-01 | 2314.20  | not significant |
| 10512 | S1PR1     | 1.04 | 1.23E-01 | 3.52E-01 | 1257.75  | not significant |
| 10513 | SNX5      | 1.04 | 6.57E-02 | 2.35E-01 | 5038.74  | not significant |
| 10514 | COX5A     | 1.04 | 1.01E-01 | 3.09E-01 | 3166.21  | not significant |
| 10515 | MAL       | 1.04 | 1.01E-01 | 3.10E-01 | 6831.10  | not significant |
| 10516 | DHRS1     | 1.04 | 6.20E-02 | 2.26E-01 | 163.69   | not significant |
| 10517 | YIPF2     | 1.04 | 1.27E-01 | 3.57E-01 | 683.80   | not significant |
| 10518 | STAM      | 1.04 | 1.25E-01 | 3.55E-01 | 791.57   | not significant |
| 10519 | NAPEPLD   | 1.04 | 1.27E-01 | 3.56E-01 | 654.81   | not significant |
| 10520 | CCND3     | 1.04 | 4.32E-02 | 1.79E-01 | 20931.37 | not significant |
| 10521 | EVL       | 1.04 | 2.29E-02 | 1.18E-01 | 16781.16 | not significant |
| 10522 | MMS19     | 1.04 | 9.01E-02 | 2.87E-01 | 2448.57  | not significant |
| 10523 | UBL7      | 1.04 | 1.14E-01 | 3.34E-01 | 1328.13  | not significant |
| 10524 | TYK2      | 1.04 | 7.70E-02 | 2.60E-01 | 3582.49  | not significant |
| 10525 | DNMBP     | 1.04 | 1.24E-01 | 3.53E-01 | 634.98   | not significant |
| 10526 | TMEM208   | 1.04 | 1.24E-01 | 3.52E-01 | 1268.06  | not significant |
| 10527 | RPS29     | 1.04 | 1.46E-01 | 3.90E-01 | 6027.64  | not significant |
| 10528 | DDX42     | 1.04 | 5.72E-02 | 2.15E-01 | 6965.04  | not significant |
| 10529 | PRKAA1    | 1.04 | 6.99E-02 | 2.45E-01 | 3256.53  | not significant |
| 10530 | SIGLEC6   | 1.04 | 7.84E-02 | 2.63E-01 | 3971.90  | not significant |
| 10531 | ABHD3     | 1.04 | 8.24E-02 | 2.72E-01 | 2317.73  | not significant |
| 10532 | DIP2A     | 1.04 | 1.12E-01 | 3.31E-01 | 1060.90  | not significant |
| 10533 | FZD1      | 1.04 | 8.10E-02 | 2.69E-01 | 239.28   | not significant |
| 10534 | RUFY1     | 1.04 | 1.05E-01 | 3.17E-01 | 1551.26  | not significant |
| 10535 | ZNF211    | 1.04 | 1.16E-01 | 3.38E-01 | 578.50   | not significant |
| 10536 | TWSG1     | 1.04 | 1.18E-01 | 3.41E-01 | 1232.97  | not significant |
| 10537 | FAM122C   | 1.04 | 4.04E-02 | 1.70E-01 | 121.99   | not significant |
| 10538 | ARL2BP    | 1.04 | 1.01E-01 | 3.09E-01 | 2032.53  | not significant |
| 10539 | UNC5CL    | 1.04 | 3.02E-02 | 1.41E-01 | 111.89   | not significant |
| 10540 | TSEN15    | 1.04 | 8.42E-02 | 2.76E-01 | 2691.07  | not significant |
| 10541 | SQRDL     | 1.04 | 1.22E-01 | 3.50E-01 | 738.35   | not significant |
| 10542 | ATP5G2    | 1.04 | 8.42E-02 | 2.76E-01 | 8821.37  | not significant |
| 10543 | RRM2      | 1.04 | 2.35E-02 | 1.20E-01 | 18482.48 | not significant |
| 10544 | JAKMIP1   | 1.04 | 9.66E-02 | 3.02E-01 | 1876.43  | not significant |
| 10545 | RCN2      | 1.04 | 9.21E-02 | 2.92E-01 | 2728.81  | not significant |
| 10546 | LSM4      | 1.04 | 8.70E-02 | 2.82E-01 | 7595.69  | not significant |
| 10547 | ZFC3H1    | 1.04 | 9.11E-02 | 2.89E-01 | 3145.38  | not significant |

|       |            |      |          |          |          |                 |
|-------|------------|------|----------|----------|----------|-----------------|
| 10548 | GPR56      | 1.04 | 8.36E-02 | 2.75E-01 | 2398.29  | not significant |
| 10549 | SFXN2      | 1.04 | 1.08E-01 | 3.23E-01 | 1057.95  | not significant |
| 10550 | CDC45      | 1.04 | 5.50E-02 | 2.10E-01 | 4136.43  | not significant |
| 10551 | RBM6       | 1.04 | 7.28E-02 | 2.51E-01 | 4460.39  | not significant |
| 10552 | ZNF740     | 1.04 | 8.64E-02 | 2.81E-01 | 2062.32  | not significant |
| 10553 | CREBL2     | 1.04 | 1.16E-01 | 3.38E-01 | 791.68   | not significant |
| 10554 | ZNF500     | 1.04 | 9.82E-02 | 3.05E-01 | 337.86   | not significant |
| 10555 | LYRM4      | 1.04 | 1.18E-01 | 3.42E-01 | 951.76   | not significant |
| 10556 | MFAP4      | 1.04 | 1.07E-01 | 3.22E-01 | 1521.19  | not significant |
| 10557 | XKR8       | 1.04 | 1.01E-01 | 3.09E-01 | 352.62   | not significant |
| 10558 | SLC2A4RG   | 1.04 | 1.02E-01 | 3.11E-01 | 351.36   | not significant |
| 10559 | APEX1      | 1.04 | 4.53E-02 | 1.85E-01 | 8986.81  | not significant |
| 10560 | INPP5B     | 1.04 | 1.11E-01 | 3.28E-01 | 1167.83  | not significant |
| 10561 | PRCP       | 1.04 | 1.18E-01 | 3.41E-01 | 619.88   | not significant |
| 10562 | KLHL26     | 1.04 | 1.10E-01 | 3.27E-01 | 419.27   | not significant |
| 10563 | GPR161     | 1.04 | 6.07E-02 | 2.23E-01 | 175.20   | not significant |
| 10564 | ZNF445     | 1.04 | 9.97E-02 | 3.08E-01 | 2612.36  | not significant |
| 10565 | DLGAP4     | 1.04 | 1.08E-01 | 3.23E-01 | 1115.72  | not significant |
| 10566 | ASCC1      | 1.04 | 1.09E-01 | 3.25E-01 | 1029.90  | not significant |
| 10567 | KLHL6      | 1.04 | 8.27E-02 | 2.73E-01 | 2275.70  | not significant |
| 10568 | PCSK7      | 1.04 | 9.52E-02 | 2.98E-01 | 1729.44  | not significant |
| 10569 | FRAT1      | 1.04 | 2.72E-02 | 1.32E-01 | 114.17   | not significant |
| 10570 | SND1       | 1.04 | 1.93E-02 | 1.04E-01 | 11572.25 | not significant |
| 10571 | CTSC       | 1.04 | 4.66E-02 | 1.87E-01 | 5298.47  | not significant |
| 10572 | PIGO       | 1.04 | 1.09E-01 | 3.25E-01 | 1154.70  | not significant |
| 10573 | RINL       | 1.04 | 1.15E-01 | 3.36E-01 | 607.98   | not significant |
| 10574 | LMAN2      | 1.04 | 4.17E-02 | 1.74E-01 | 6035.92  | not significant |
| 10575 | OBSCN      | 1.04 | 1.13E-01 | 3.33E-01 | 1406.26  | not significant |
| 10576 | PITPNA-AS1 | 1.04 | 6.65E-02 | 2.37E-01 | 211.68   | not significant |
| 10577 | RPS7       | 1.04 | 7.31E-02 | 2.52E-01 | 13557.71 | not significant |
| 10578 | TMEM14C    | 1.04 | 1.02E-01 | 3.12E-01 | 1569.57  | not significant |
| 10579 | MLH1       | 1.04 | 8.03E-02 | 2.68E-01 | 2618.52  | not significant |
| 10580 | LOC642846  | 1.04 | 1.14E-01 | 3.35E-01 | 754.63   | not significant |
| 10581 | ANKLE2     | 1.04 | 3.62E-02 | 1.59E-01 | 5712.06  | not significant |
| 10582 | PTPRK      | 1.04 | 1.02E-01 | 3.12E-01 | 1765.96  | not significant |
| 10583 | ZNF784     | 1.04 | 2.46E-02 | NA       | 97.64    | not significant |
| 10584 | LINC01004  | 1.04 | 1.86E-02 | NA       | 89.20    | not significant |
| 10585 | RHOT2      | 1.04 | 6.22E-02 | 2.27E-01 | 3041.91  | not significant |
| 10586 | RAP1GAP    | 1.04 | 7.71E-02 | 2.60E-01 | 3719.52  | not significant |
| 10587 | CITED2     | 1.04 | 1.13E-01 | 3.33E-01 | 641.05   | not significant |
| 10588 | A1BG       | 1.04 | 8.77E-02 | 2.83E-01 | 311.79   | not significant |
| 10589 | MFSD10     | 1.04 | 1.07E-01 | 3.21E-01 | 931.14   | not significant |
| 10590 | MAP2K7     | 1.04 | 8.00E-02 | 2.67E-01 | 2237.85  | not significant |
| 10591 | DUS4L      | 1.04 | 1.12E-01 | 3.31E-01 | 574.80   | not significant |
| 10592 | CDPF1      | 1.04 | 6.46E-02 | 2.32E-01 | 200.56   | not significant |
| 10593 | NIPSNAP1   | 1.04 | 7.99E-02 | 2.67E-01 | 2511.86  | not significant |
| 10594 | TRAPPC2    | 1.04 | 1.12E-01 | 3.31E-01 | 708.02   | not significant |
| 10595 | SYS1       | 1.04 | 9.82E-02 | 3.05E-01 | 1339.44  | not significant |
| 10596 | ABHD16A    | 1.04 | 1.06E-01 | 3.20E-01 | 994.66   | not significant |
| 10597 | MR1        | 1.04 | 1.09E-01 | 3.26E-01 | 657.16   | not significant |
| 10598 | PKN1       | 1.04 | 3.43E-02 | 1.53E-01 | 6493.85  | not significant |
| 10599 | BCR        | 1.04 | 5.70E-02 | 2.15E-01 | 3202.51  | not significant |
| 10600 | USP21      | 1.04 | 9.70E-02 | 3.02E-01 | 1267.30  | not significant |
| 10601 | PCNT       | 1.04 | 8.69E-02 | 2.82E-01 | 2317.75  | not significant |
| 10602 | LRRC8A     | 1.04 | 1.02E-01 | 3.12E-01 | 1199.02  | not significant |
| 10603 | GABRB3     | 1.04 | 1.05E-01 | 3.17E-01 | 910.31   | not significant |
| 10604 | SLC38A9    | 1.04 | 1.03E-01 | 3.13E-01 | 1068.01  | not significant |
| 10605 | CROCC      | 1.04 | 1.09E-01 | 3.25E-01 | 833.94   | not significant |
| 10606 | DHRS13     | 1.04 | 1.10E-01 | 3.27E-01 | 590.19   | not significant |
| 10607 | RWDD3      | 1.04 | 4.88E-02 | 1.94E-01 | 221.92   | not significant |
| 10608 | NFE2L3     | 1.04 | 7.51E-02 | 2.55E-01 | 247.06   | not significant |
| 10609 | PGBD2      | 1.04 | 7.65E-02 | 2.59E-01 | 220.19   | not significant |
| 10610 | LTA4H      | 1.04 | 5.03E-02 | 1.98E-01 | 3337.35  | not significant |
| 10611 | CROCCP2    | 1.04 | 1.07E-01 | 3.21E-01 | 504.88   | not significant |
| 10612 | FZD5       | 1.04 | 5.48E-02 | 2.09E-01 | 150.91   | not significant |
| 10613 | SUMO2      | 1.04 | 5.90E-02 | 2.19E-01 | 6977.77  | not significant |
| 10614 | GIMAP6     | 1.04 | 3.64E-02 | 1.59E-01 | 4718.22  | not significant |
| 10615 | WDTC1      | 1.04 | 7.44E-02 | 2.54E-01 | 2089.66  | not significant |
| 10616 | ACYP1      | 1.04 | 1.01E-01 | 3.09E-01 | 546.28   | not significant |
| 10617 | ZBTB1      | 1.04 | 6.73E-02 | 2.39E-01 | 2762.78  | not significant |
| 10618 | CD248      | 1.04 | 1.07E-01 | 3.22E-01 | 610.48   | not significant |
| 10619 | ZSCAN26    | 1.04 | 8.47E-02 | 2.76E-01 | 282.44   | not significant |
| 10620 | C9orf72    | 1.04 | 8.07E-02 | 2.68E-01 | 252.21   | not significant |
| 10621 | NDFIP1     | 1.04 | 3.54E-02 | 1.57E-01 | 5303.34  | not significant |
| 10622 | AKR1A1     | 1.04 | 6.86E-02 | 2.42E-01 | 2878.31  | not significant |
| 10623 | PRRC2B     | 1.04 | 6.57E-02 | 2.35E-01 | 6602.31  | not significant |
| 10624 | TSC22D1    | 1.04 | 7.51E-02 | 2.55E-01 | 1959.55  | not significant |
| 10625 | SMARCC2    | 1.04 | 4.50E-02 | 1.84E-01 | 8659.52  | not significant |
| 10626 | PELO       | 1.04 | 8.11E-02 | 2.69E-01 | 1793.33  | not significant |
| 10627 | POFUT2     | 1.04 | 1.00E-01 | 3.09E-01 | 442.43   | not significant |
| 10628 | SFT2D1     | 1.04 | 7.97E-02 | 2.66E-01 | 1822.33  | not significant |
| 10629 | SSR3       | 1.04 | 2.68E-02 | 1.30E-01 | 6644.58  | not significant |
| 10630 | TSNAX      | 1.04 | 8.99E-02 | 2.87E-01 | 1643.05  | not significant |
| 10631 | MAPK7      | 1.04 | 9.99E-02 | 3.08E-01 | 956.80   | not significant |
| 10632 | TRIQK      | 1.04 | 1.00E-01 | 3.09E-01 | 429.30   | not significant |
| 10633 | NUBP2      | 1.04 | 8.79E-02 | 2.84E-01 | 2423.95  | not significant |
| 10634 | TMEM218    | 1.04 | 1.05E-01 | 3.18E-01 | 538.05   | not significant |
| 10635 | RFC4       | 1.04 | 6.03E-02 | 2.22E-01 | 3200.93  | not significant |

|       |            |      |          |          |          |                 |
|-------|------------|------|----------|----------|----------|-----------------|
| 10636 | PNISR      | 1.04 | 6.50E-02 | 2.33E-01 | 3903.12  | not significant |
| 10637 | BCKDHA     | 1.04 | 1.04E-01 | 3.17E-01 | 660.56   | not significant |
| 10638 | RFC5       | 1.04 | 3.49E-02 | 1.56E-01 | 4827.28  | not significant |
| 10639 | RTN3       | 1.04 | 2.70E-02 | 1.31E-01 | 6617.95  | not significant |
| 10640 | REPIN1     | 1.04 | 3.55E-02 | 1.57E-01 | 4746.66  | not significant |
| 10641 | TBC1D9     | 1.04 | 1.04E-01 | 3.16E-01 | 496.03   | not significant |
| 10642 | PLAUR      | 1.04 | 9.56E-02 | 2.99E-01 | 350.05   | not significant |
| 10643 | GATSL3     | 1.04 | 9.27E-02 | 2.93E-01 | 1287.18  | not significant |
| 10644 | BDH2       | 1.04 | 1.06E-01 | 3.19E-01 | 852.02   | not significant |
| 10645 | SORL1      | 1.04 | 8.75E-02 | 2.83E-01 | 2896.57  | not significant |
| 10646 | TCTN3      | 1.04 | 9.42E-02 | 2.96E-01 | 1208.02  | not significant |
| 10647 | BAHCC1     | 1.04 | 9.73E-02 | 3.03E-01 | 1756.84  | not significant |
| 10648 | ALKBH4     | 1.04 | 9.92E-02 | 3.07E-01 | 583.48   | not significant |
| 10649 | ZNF747     | 1.04 | 1.05E-01 | 3.18E-01 | 772.36   | not significant |
| 10650 | CAST       | 1.04 | 1.03E-01 | 3.13E-01 | 612.66   | not significant |
| 10651 | CLCN3      | 1.04 | 6.36E-02 | 2.30E-01 | 4434.99  | not significant |
| 10652 | TYMS       | 1.04 | 2.82E-02 | 1.35E-01 | 24436.59 | not significant |
| 10653 | NMRAL1     | 1.04 | 6.32E-02 | 2.29E-01 | 2945.90  | not significant |
| 10654 | C18orf8    | 1.04 | 8.47E-02 | 2.76E-01 | 1365.46  | not significant |
| 10655 | OSTC       | 1.04 | 5.76E-02 | 2.16E-01 | 4024.45  | not significant |
| 10656 | SLIT1      | 1.04 | 5.10E-02 | 2.00E-01 | 7237.40  | not significant |
| 10657 | TATDN3     | 1.04 | 9.68E-02 | 3.02E-01 | 877.61   | not significant |
| 10658 | WDR70      | 1.04 | 1.05E-01 | 3.18E-01 | 698.86   | not significant |
| 10659 | XRCC2      | 1.04 | 1.01E-01 | 3.10E-01 | 1654.36  | not significant |
| 10660 | PPM1B      | 1.04 | 7.93E-02 | 2.65E-01 | 1962.98  | not significant |
| 10661 | PLOD1      | 1.04 | 8.74E-02 | 2.83E-01 | 1328.01  | not significant |
| 10662 | ITK        | 1.04 | 2.86E-02 | 1.36E-01 | 7246.15  | not significant |
| 10663 | DERL2      | 1.04 | 9.24E-02 | 2.92E-01 | 1075.91  | not significant |
| 10664 | CCDC64     | 1.04 | 9.51E-02 | 2.98E-01 | 1005.23  | not significant |
| 10665 | ZNF154     | 1.04 | 9.87E-02 | 3.06E-01 | 1101.99  | not significant |
| 10666 | ZNF10      | 1.04 | 1.01E-01 | 3.09E-01 | 524.60   | not significant |
| 10667 | WDYHV1     | 1.04 | 9.95E-02 | 3.08E-01 | 895.79   | not significant |
| 10668 | RNF149     | 1.04 | 7.86E-02 | 2.63E-01 | 1510.83  | not significant |
| 10669 | POLE4      | 1.04 | 1.06E-01 | 3.19E-01 | 873.06   | not significant |
| 10670 | ABHD17A    | 1.04 | 9.75E-02 | 3.03E-01 | 982.49   | not significant |
| 10671 | C2orf48    | 1.04 | 1.43E-02 | NA       | 82.46    | not significant |
| 10672 | RBCK1      | 1.04 | 3.81E-02 | 1.64E-01 | 3917.45  | not significant |
| 10673 | FIGNL2     | 1.04 | 1.28E-02 | NA       | 81.63    | not significant |
| 10674 | ERAP2      | 1.04 | 3.30E-02 | 1.49E-01 | 11532.81 | not significant |
| 10675 | DNA2       | 1.04 | 5.20E-02 | 2.02E-01 | 2913.64  | not significant |
| 10676 | NUDT8      | 1.04 | 7.38E-02 | 2.53E-01 | 278.41   | not significant |
| 10677 | RSRP1      | 1.04 | 8.99E-02 | 2.87E-01 | 990.61   | not significant |
| 10678 | FAM89A     | 1.04 | 6.33E-02 | 2.29E-01 | 210.17   | not significant |
| 10679 | STMN1      | 1.04 | 2.70E-02 | 1.31E-01 | 37240.95 | not significant |
| 10680 | POLM       | 1.04 | 5.64E-02 | 2.13E-01 | 3324.62  | not significant |
| 10681 | CDH4       | 1.04 | 8.31E-02 | 2.73E-01 | 1278.74  | not significant |
| 10682 | ZNF692     | 1.04 | 9.22E-02 | 2.92E-01 | 896.22   | not significant |
| 10683 | CD5        | 1.04 | 2.57E-02 | 1.27E-01 | 6042.29  | not significant |
| 10684 | APMAP      | 1.04 | 4.46E-02 | 1.83E-01 | 3590.78  | not significant |
| 10685 | RBBP4      | 1.04 | 1.13E-02 | 7.22E-02 | 15299.06 | not significant |
| 10686 | C5orf15    | 1.04 | 7.04E-02 | 2.46E-01 | 1940.65  | not significant |
| 10687 | SLC4A4     | 1.04 | 9.49E-02 | 2.97E-01 | 1104.25  | not significant |
| 10688 | WDR83      | 1.04 | 9.21E-02 | 2.92E-01 | 470.85   | not significant |
| 10689 | FGL2       | 1.04 | 8.71E-02 | 2.82E-01 | 378.30   | not significant |
| 10690 | RASA4CP    | 1.04 | 5.36E-02 | 2.06E-01 | 191.47   | not significant |
| 10691 | EXT2       | 1.04 | 7.87E-02 | 2.64E-01 | 1466.86  | not significant |
| 10692 | SLC11A2    | 1.04 | 7.06E-02 | 2.46E-01 | 1904.91  | not significant |
| 10693 | IMPDH2     | 1.04 | 3.34E-02 | 1.50E-01 | 10384.33 | not significant |
| 10694 | MCM5       | 1.04 | 2.64E-02 | 1.29E-01 | 12312.74 | not significant |
| 10695 | RPL26      | 1.04 | 6.21E-02 | 2.26E-01 | 8520.59  | not significant |
| 10696 | MBD4       | 1.04 | 5.78E-02 | 2.16E-01 | 2259.98  | not significant |
| 10697 | GGT7       | 1.04 | 8.87E-02 | 2.85E-01 | 978.07   | not significant |
| 10698 | LOC399491  | 1.04 | 7.63E-02 | 2.58E-01 | 312.18   | not significant |
| 10699 | ACAP3      | 1.04 | 6.64E-02 | 2.36E-01 | 1863.18  | not significant |
| 10700 | DUSP22     | 1.04 | 8.89E-02 | 2.85E-01 | 865.91   | not significant |
| 10701 | VEGFB      | 1.04 | 9.28E-02 | 2.93E-01 | 1131.51  | not significant |
| 10702 | C1D        | 1.04 | 9.41E-02 | 2.96E-01 | 579.79   | not significant |
| 10703 | SLC18B1    | 1.04 | 9.40E-02 | 2.96E-01 | 492.41   | not significant |
| 10704 | ZFYVE1     | 1.04 | 9.36E-02 | 2.95E-01 | 766.30   | not significant |
| 10705 | CPSF1      | 1.04 | 3.99E-02 | 1.70E-01 | 4377.55  | not significant |
| 10706 | ZNF674-AS1 | 1.04 | 4.64E-02 | 1.87E-01 | 162.67   | not significant |
| 10707 | KIAA1107   | 1.04 | 1.87E-02 | NA       | 99.46    | not significant |
| 10708 | MOB2       | 1.04 | 9.62E-02 | 3.01E-01 | 449.75   | not significant |
| 10709 | SCD        | 1.04 | 3.26E-02 | 1.48E-01 | 35041.20 | not significant |
| 10710 | ZFAND1     | 1.04 | 9.41E-02 | 2.96E-01 | 834.90   | not significant |
| 10711 | ARHGAP27   | 1.04 | 9.83E-02 | 3.05E-01 | 836.26   | not significant |
| 10712 | SPG7       | 1.04 | 6.57E-02 | 2.35E-01 | 1791.04  | not significant |
| 10713 | SASS6      | 1.04 | 7.82E-02 | 2.63E-01 | 1549.46  | not significant |
| 10714 | ACVR2B     | 1.04 | 8.90E-02 | 2.85E-01 | 1201.27  | not significant |
| 10715 | EXOSC9     | 1.04 | 5.12E-02 | 2.00E-01 | 2662.74  | not significant |
| 10716 | MICU2      | 1.04 | 7.48E-02 | 2.55E-01 | 1384.97  | not significant |
| 10717 | PSPH       | 1.04 | 6.82E-02 | 2.41E-01 | 2062.70  | not significant |
| 10718 | ZFP36L1    | 1.04 | 7.79E-02 | 2.62E-01 | 1207.39  | not significant |
| 10719 | IFT80      | 1.04 | 9.08E-02 | 2.89E-01 | 735.20   | not significant |
| 10720 | HLA-C      | 1.04 | 4.48E-02 | 1.83E-01 | 8291.46  | not significant |
| 10721 | PHF2       | 1.04 | 4.18E-02 | 1.75E-01 | 3018.95  | not significant |
| 10722 | SLC38A10   | 1.04 | 5.22E-02 | 2.02E-01 | 3062.74  | not significant |
| 10723 | THEM6      | 1.04 | 8.74E-02 | 2.83E-01 | 967.17   | not significant |

|       |              |      |          |          |          |                 |
|-------|--------------|------|----------|----------|----------|-----------------|
| 10724 | GCHFR        | 1.04 | 7.67E-02 | 2.59E-01 | 159.79   | not significant |
| 10725 | YJEFN3       | 1.04 | 1.50E-02 | NA       | 88.70    | not significant |
| 10726 | NAP1L1       | 1.04 | 1.23E-02 | 7.66E-02 | 34582.38 | not significant |
| 10727 | RNPEPL1      | 1.04 | 6.35E-02 | 2.29E-01 | 1939.75  | not significant |
| 10728 | KHK          | 1.04 | 6.66E-02 | 2.37E-01 | 268.91   | not significant |
| 10729 | TP53         | 1.04 | 2.95E-02 | 1.39E-01 | 5016.96  | not significant |
| 10730 | WDR48        | 1.04 | 6.61E-02 | 2.36E-01 | 1523.71  | not significant |
| 10731 | SEC11C       | 1.04 | 7.99E-02 | 2.67E-01 | 1596.66  | not significant |
| 10732 | IAH1         | 1.04 | 8.91E-02 | 2.85E-01 | 961.48   | not significant |
| 10733 | SCCPDH       | 1.04 | 4.32E-02 | 1.79E-01 | 3548.68  | not significant |
| 10734 | PNKD         | 1.04 | 8.85E-02 | 2.85E-01 | 824.39   | not significant |
| 10735 | RAP2A        | 1.04 | 6.34E-02 | 2.29E-01 | 1747.81  | not significant |
| 10736 | CDC42BPG     | 1.04 | 5.94E-02 | 2.20E-01 | 219.71   | not significant |
| 10737 | ZC3H10       | 1.04 | 8.49E-02 | 2.77E-01 | 437.13   | not significant |
| 10738 | WDR91        | 1.04 | 8.88E-02 | 2.85E-01 | 485.83   | not significant |
| 10739 | LEPRE1       | 1.04 | 7.03E-02 | 2.46E-01 | 1344.39  | not significant |
| 10740 | MIB2         | 1.04 | 8.15E-02 | 2.70E-01 | 1024.71  | not significant |
| 10741 | SLC48A1      | 1.04 | 1.89E-02 | NA       | 98.77    | not significant |
| 10742 | COX7A2L      | 1.04 | 5.53E-02 | 2.10E-01 | 4281.71  | not significant |
| 10743 | C6orf89      | 1.04 | 3.07E-02 | 1.42E-01 | 4262.45  | not significant |
| 10744 | RASAL3       | 1.04 | 4.60E-02 | 1.86E-01 | 2406.50  | not significant |
| 10745 | RIMKLB       | 1.04 | 8.71E-02 | 2.82E-01 | 794.38   | not significant |
| 10746 | TSPAN31      | 1.04 | 7.64E-02 | 2.59E-01 | 327.80   | not significant |
| 10747 | L3MBTL3      | 1.04 | 8.35E-02 | 2.74E-01 | 946.21   | not significant |
| 10748 | ZNF212       | 1.04 | 8.69E-02 | 2.82E-01 | 697.08   | not significant |
| 10749 | MAP10        | 1.04 | 8.70E-02 | 2.82E-01 | 551.36   | not significant |
| 10750 | CDK19        | 1.04 | 7.40E-02 | 2.53E-01 | 1333.18  | not significant |
| 10751 | FGD3         | 1.04 | 7.95E-02 | 2.66E-01 | 974.26   | not significant |
| 10752 | DNAJC25      | 1.04 | 5.83E-02 | 2.18E-01 | 227.42   | not significant |
| 10753 | DHCR24       | 1.04 | 3.39E-02 | 1.51E-01 | 6654.49  | not significant |
| 10754 | HPS5         | 1.04 | 7.81E-02 | 2.63E-01 | 1006.58  | not significant |
| 10755 | CLK3         | 1.04 | 6.63E-02 | 2.36E-01 | 1432.55  | not significant |
| 10756 | SLC45A4      | 1.04 | 5.49E-02 | 2.09E-01 | 2339.80  | not significant |
| 10757 | LIME1        | 1.04 | 8.53E-02 | 2.78E-01 | 738.72   | not significant |
| 10758 | TRAT1        | 1.04 | 6.96E-02 | 2.44E-01 | 1552.09  | not significant |
| 10759 | ANKRD32      | 1.04 | 6.82E-02 | 2.41E-01 | 1388.54  | not significant |
| 10760 | LINC01366    | 1.04 | 4.19E-02 | 1.75E-01 | 158.18   | not significant |
| 10761 | TMC8         | 1.04 | 2.69E-02 | 1.30E-01 | 6959.57  | not significant |
| 10762 | ATP8A1       | 1.04 | 8.60E-02 | 2.80E-01 | 635.94   | not significant |
| 10763 | RECQL        | 1.04 | 3.69E-02 | 1.60E-01 | 3136.54  | not significant |
| 10764 | RNF31        | 1.04 | 4.50E-02 | 1.84E-01 | 2552.96  | not significant |
| 10765 | VAMP2        | 1.04 | 8.05E-02 | 2.68E-01 | 861.37   | not significant |
| 10766 | PEX16        | 1.04 | 8.32E-02 | 2.74E-01 | 792.80   | not significant |
| 10767 | DERL3        | 1.04 | 3.03E-02 | 1.41E-01 | 126.29   | not significant |
| 10768 | TNIP1        | 1.04 | 4.94E-02 | 1.95E-01 | 3147.79  | not significant |
| 10769 | WDR76        | 1.04 | 5.71E-02 | 2.15E-01 | 2294.65  | not significant |
| 10770 | SETD1B       | 1.04 | 5.81E-02 | 2.17E-01 | 3182.73  | not significant |
| 10771 | PCNXL2       | 1.04 | 8.83E-02 | 2.84E-01 | 711.79   | not significant |
| 10772 | NRROS        | 1.04 | 1.87E-02 | 1.02E-01 | 6363.85  | not significant |
| 10773 | CDIPT        | 1.04 | 4.54E-02 | 1.85E-01 | 2253.46  | not significant |
| 10774 | UTRN         | 1.04 | 6.36E-02 | 2.30E-01 | 3373.35  | not significant |
| 10775 | PMS2P1       | 1.04 | 7.46E-02 | 2.54E-01 | 1003.04  | not significant |
| 10776 | TMEM154      | 1.04 | 8.78E-02 | 2.83E-01 | 800.29   | not significant |
| 10777 | RPS21        | 1.04 | 1.04E-01 | 3.17E-01 | 9615.72  | not significant |
| 10778 | QARS         | 1.04 | 2.59E-02 | 1.28E-01 | 4502.39  | not significant |
| 10779 | GCH1         | 1.04 | 4.33E-02 | 1.79E-01 | 3054.36  | not significant |
| 10780 | STARD4       | 1.04 | 4.79E-02 | 1.91E-01 | 2105.84  | not significant |
| 10781 | TMEM179B     | 1.04 | 8.29E-02 | 2.73E-01 | 718.92   | not significant |
| 10782 | COA3         | 1.04 | 8.39E-02 | 2.75E-01 | 572.01   | not significant |
| 10783 | KLC4         | 1.04 | 7.51E-02 | 2.56E-01 | 370.88   | not significant |
| 10784 | SLC25A16     | 1.04 | 7.82E-02 | 2.63E-01 | 389.52   | not significant |
| 10785 | RSL24D1      | 1.04 | 4.92E-02 | 1.95E-01 | 3965.07  | not significant |
| 10786 | RFX3         | 1.04 | 7.18E-02 | 2.49E-01 | 434.46   | not significant |
| 10787 | NASP         | 1.04 | 2.24E-02 | 1.16E-01 | 11130.67 | not significant |
| 10788 | ZNF672       | 1.04 | 4.53E-02 | 1.85E-01 | 2261.36  | not significant |
| 10789 | WDR11        | 1.04 | 6.23E-02 | 2.27E-01 | 1424.08  | not significant |
| 10790 | SNHG1        | 1.04 | 1.88E-02 | 1.03E-01 | 6136.54  | not significant |
| 10791 | HIAT1        | 1.04 | 3.01E-02 | 1.41E-01 | 3363.37  | not significant |
| 10792 | PLA2G15      | 1.04 | 8.34E-02 | 2.74E-01 | 291.79   | not significant |
| 10793 | HS1BP3       | 1.04 | 5.88E-02 | 2.19E-01 | 230.95   | not significant |
| 10794 | STARD9       | 1.04 | 7.41E-02 | 2.53E-01 | 391.52   | not significant |
| 10795 | LY6E         | 1.04 | 6.86E-02 | 2.42E-01 | 1622.43  | not significant |
| 10796 | TCTN2        | 1.04 | 4.06E-02 | 1.71E-01 | 172.61   | not significant |
| 10797 | CEP72        | 1.04 | 8.12E-02 | 2.69E-01 | 543.24   | not significant |
| 10798 | MTCH1        | 1.04 | 1.91E-02 | 1.04E-01 | 7269.37  | not significant |
| 10799 | ODF2L        | 1.04 | 7.94E-02 | 2.65E-01 | 731.22   | not significant |
| 10800 | FOXO6        | 1.04 | 8.28E-02 | 2.73E-01 | 452.99   | not significant |
| 10801 | TMEM106C     | 1.04 | 3.66E-02 | 1.59E-01 | 7287.29  | not significant |
| 10802 | LRRC57       | 1.05 | 8.02E-02 | 2.67E-01 | 504.85   | not significant |
| 10803 | NFATC2       | 1.05 | 4.40E-02 | 1.81E-01 | 2178.26  | not significant |
| 10804 | LOC100507419 | 1.05 | 3.17E-02 | 1.45E-01 | 138.60   | not significant |
| 10805 | VPS51        | 1.05 | 4.39E-02 | 1.81E-01 | 3018.91  | not significant |
| 10806 | GTPBP8       | 1.05 | 7.70E-02 | 2.60E-01 | 729.88   | not significant |
| 10807 | C2CD5        | 1.05 | 4.72E-02 | 1.89E-01 | 2412.33  | not significant |
| 10808 | NARF         | 1.05 | 3.91E-02 | 1.67E-01 | 2921.10  | not significant |
| 10809 | KBTBD4       | 1.05 | 8.01E-02 | 2.67E-01 | 838.66   | not significant |
| 10810 | CCDC71L      | 1.05 | 7.78E-02 | 2.62E-01 | 721.70   | not significant |
| 10811 | DVL3         | 1.05 | 2.49E-02 | 1.24E-01 | 3918.96  | not significant |

|       |           |      |          |          |          |                 |
|-------|-----------|------|----------|----------|----------|-----------------|
| 10812 | PKN3      | 1.05 | 5.85E-02 | 2.18E-01 | 246.96   | not significant |
| 10813 | ARL6IP6   | 1.05 | 5.26E-02 | 2.03E-01 | 1948.57  | not significant |
| 10814 | HEIH      | 1.05 | 7.19E-02 | 2.49E-01 | 710.35   | not significant |
| 10815 | HCAR1     | 1.05 | 8.13E-02 | 2.70E-01 | 495.93   | not significant |
| 10816 | RFC1      | 1.05 | 1.79E-02 | 9.94E-02 | 6431.77  | not significant |
| 10817 | SLC23A2   | 1.05 | 5.35E-02 | 2.06E-01 | 2757.38  | not significant |
| 10818 | FLT1      | 1.05 | 6.55E-02 | 2.35E-01 | 1574.25  | not significant |
| 10819 | CSNK1E    | 1.05 | 4.03E-02 | 1.70E-01 | 2134.51  | not significant |
| 10820 | ZNF792    | 1.05 | 6.00E-02 | 2.21E-01 | 255.74   | not significant |
| 10821 | TRG-AS1   | 1.05 | 2.73E-02 | 1.32E-01 | 3839.18  | not significant |
| 10822 | TMEM123   | 1.05 | 8.57E-03 | 5.97E-02 | 18499.45 | not significant |
| 10823 | TOM1L2    | 1.05 | 7.05E-02 | 2.46E-01 | 342.97   | not significant |
| 10824 | WDR54     | 1.05 | 7.56E-02 | 2.57E-01 | 640.61   | not significant |
| 10825 | DIDO1     | 1.05 | 3.28E-02 | 1.48E-01 | 4250.03  | not significant |
| 10826 | SENP7     | 1.05 | 6.86E-02 | 2.42E-01 | 1095.67  | not significant |
| 10827 | STYXL1    | 1.05 | 6.55E-02 | 2.35E-01 | 286.51   | not significant |
| 10828 | VEZT      | 1.05 | 2.37E-02 | 1.20E-01 | 3799.43  | not significant |
| 10829 | ZNF646    | 1.05 | 5.95E-02 | 2.21E-01 | 1710.82  | not significant |
| 10830 | HDHD3     | 1.05 | 6.83E-02 | 2.41E-01 | 301.18   | not significant |
| 10831 | PLK4      | 1.05 | 3.65E-02 | 1.59E-01 | 3432.48  | not significant |
| 10832 | MAN2B2    | 1.05 | 5.34E-02 | 2.06E-01 | 1683.64  | not significant |
| 10833 | RTTN      | 1.05 | 6.74E-02 | 2.39E-01 | 1436.40  | not significant |
| 10834 | C17orf53  | 1.05 | 7.79E-02 | 2.62E-01 | 506.05   | not significant |
| 10835 | UNKL      | 1.05 | 7.30E-02 | 2.51E-01 | 787.18   | not significant |
| 10836 | SLC2A11   | 1.05 | 2.60E-02 | 1.28E-01 | 122.82   | not significant |
| 10837 | PGLS      | 1.05 | 5.47E-02 | 2.09E-01 | 2092.56  | not significant |
| 10838 | TMEM243   | 1.05 | 7.09E-02 | 2.47E-01 | 903.07   | not significant |
| 10839 | WDR5B     | 1.05 | 6.63E-02 | 2.36E-01 | 323.26   | not significant |
| 10840 | EPHX2     | 1.05 | 6.11E-02 | 2.24E-01 | 321.81   | not significant |
| 10841 | PFDN4     | 1.05 | 7.28E-02 | 2.51E-01 | 542.65   | not significant |
| 10842 | SLC39A4   | 1.05 | 1.53E-02 | 9.03E-02 | 104.89   | not significant |
| 10843 | DENND2D   | 1.05 | 1.01E-02 | 6.70E-02 | 7771.48  | not significant |
| 10844 | SEMA4D    | 1.05 | 1.63E-02 | 9.37E-02 | 9669.04  | not significant |
| 10845 | MTG1      | 1.05 | 5.23E-02 | 2.03E-01 | 1481.51  | not significant |
| 10846 | EIF2A     | 1.05 | 2.17E-02 | 1.13E-01 | 3649.48  | not significant |
| 10847 | PJA2      | 1.05 | 2.48E-02 | 1.24E-01 | 3567.74  | not significant |
| 10848 | C16orf58  | 1.05 | 4.58E-02 | 1.86E-01 | 1814.95  | not significant |
| 10849 | SFMBT1    | 1.05 | 5.58E-02 | 2.12E-01 | 1761.40  | not significant |
| 10850 | FANCD2    | 1.05 | 3.18E-02 | 1.45E-01 | 3896.15  | not significant |
| 10851 | QPCTL     | 1.05 | 6.39E-02 | 2.30E-01 | 303.76   | not significant |
| 10852 | CLUAP1    | 1.05 | 7.41E-02 | 2.53E-01 | 557.96   | not significant |
| 10853 | PREX1     | 1.05 | 2.80E-02 | 1.34E-01 | 3085.71  | not significant |
| 10854 | CD200R1   | 1.05 | 7.03E-02 | 2.46E-01 | 307.10   | not significant |
| 10855 | JUNB      | 1.05 | 3.72E-02 | 1.61E-01 | 3082.18  | not significant |
| 10856 | AKAP8L    | 1.05 | 3.83E-02 | 1.65E-01 | 2126.26  | not significant |
| 10857 | CRIP1     | 1.05 | 7.49E-02 | 2.55E-01 | 419.88   | not significant |
| 10858 | IPO7      | 1.05 | 6.13E-03 | 4.72E-02 | 15092.16 | not significant |
| 10859 | SLC6A6    | 1.05 | 4.24E-02 | 1.77E-01 | 2817.11  | not significant |
| 10860 | CEP83     | 1.05 | 6.04E-02 | 2.22E-01 | 1076.14  | not significant |
| 10861 | ABHD15    | 1.05 | 7.21E-02 | 2.50E-01 | 476.22   | not significant |
| 10862 | BSDC1     | 1.05 | 4.98E-02 | 1.96E-01 | 1617.83  | not significant |
| 10863 | PLEKHJ1   | 1.05 | 5.08E-02 | 1.99E-01 | 2619.58  | not significant |
| 10864 | IRX3      | 1.05 | 7.46E-02 | 2.54E-01 | 771.35   | not significant |
| 10865 | DPY19L2P2 | 1.05 | 6.89E-02 | 2.42E-01 | 717.62   | not significant |
| 10866 | SAMD9L    | 1.05 | 7.27E-02 | 2.51E-01 | 873.95   | not significant |
| 10867 | NIN       | 1.05 | 3.89E-02 | 1.66E-01 | 3369.07  | not significant |
| 10868 | ATXN2L    | 1.05 | 1.44E-02 | 8.62E-02 | 14531.48 | not significant |
| 10869 | MAD2L2    | 1.05 | 4.55E-02 | 1.85E-01 | 5223.67  | not significant |
| 10870 | TTC9C     | 1.05 | 6.83E-02 | 2.41E-01 | 863.15   | not significant |
| 10871 | MZT1      | 1.05 | 4.56E-02 | 1.86E-01 | 2845.54  | not significant |
| 10872 | GINS2     | 1.05 | 4.16E-02 | 1.74E-01 | 3276.43  | not significant |
| 10873 | EEF1A1    | 1.05 | 1.92E-02 | 1.04E-01 | 98678.03 | not significant |
| 10874 | GRAMD4    | 1.05 | 1.93E-02 | 1.04E-01 | 5064.95  | not significant |
| 10875 | EML3      | 1.05 | 4.52E-02 | 1.85E-01 | 1750.92  | not significant |
| 10876 | TUBG2     | 1.05 | 6.19E-02 | 2.26E-01 | 281.91   | not significant |
| 10877 | NAA40     | 1.05 | 4.46E-02 | 1.83E-01 | 1948.20  | not significant |
| 10878 | TEP1      | 1.05 | 5.28E-02 | 2.04E-01 | 1604.09  | not significant |
| 10879 | VEGFA     | 1.05 | 6.39E-02 | 2.30E-01 | 1085.95  | not significant |
| 10880 | APBA3     | 1.05 | 7.17E-02 | 2.49E-01 | 813.33   | not significant |
| 10881 | IQGAP3    | 1.05 | 7.28E-02 | 2.51E-01 | 813.53   | not significant |
| 10882 | TCTA      | 1.05 | 6.80E-02 | 2.41E-01 | 692.10   | not significant |
| 10883 | UBXN8     | 1.05 | 7.26E-02 | 2.51E-01 | 628.28   | not significant |
| 10884 | SCD5      | 1.05 | 4.57E-02 | 1.86E-01 | 1712.89  | not significant |
| 10885 | JKAMP     | 1.05 | 6.04E-02 | 2.22E-01 | 1110.21  | not significant |
| 10886 | ALG10B    | 1.05 | 6.70E-02 | 2.38E-01 | 1253.85  | not significant |
| 10887 | CHIC2     | 1.05 | 5.86E-02 | 2.18E-01 | 266.60   | not significant |
| 10888 | SRPK2     | 1.05 | 1.20E-02 | 7.54E-02 | 5539.25  | not significant |
| 10889 | ASXL1     | 1.05 | 2.15E-02 | 1.13E-01 | 5582.67  | not significant |
| 10890 | TPRA1     | 1.05 | 6.12E-02 | 2.24E-01 | 979.79   | not significant |
| 10891 | DNAJC18   | 1.05 | 7.04E-02 | 2.46E-01 | 448.63   | not significant |
| 10892 | STX2      | 1.05 | 5.54E-02 | 2.11E-01 | 1239.47  | not significant |
| 10893 | PTGES2    | 1.05 | 6.23E-02 | 2.27E-01 | 952.11   | not significant |
| 10894 | FBXO9     | 1.05 | 3.53E-02 | 1.56E-01 | 2102.20  | not significant |
| 10895 | RASA2     | 1.05 | 5.51E-02 | 2.10E-01 | 1419.20  | not significant |
| 10896 | GCNT1     | 1.05 | 6.42E-02 | 2.31E-01 | 338.50   | not significant |
| 10897 | COA1      | 1.05 | 3.07E-02 | 1.42E-01 | 3266.51  | not significant |
| 10898 | USP28     | 1.05 | 6.58E-02 | 2.35E-01 | 862.00   | not significant |
| 10899 | MBLAC2    | 1.05 | 6.87E-02 | 2.42E-01 | 562.91   | not significant |

|       |              |      |          |          |          |                 |
|-------|--------------|------|----------|----------|----------|-----------------|
| 10900 | BBIP1        | 1.05 | 6.28E-02 | 2.28E-01 | 342.08   | not significant |
| 10901 | UXT          | 1.05 | 5.89E-02 | 2.19E-01 | 1438.51  | not significant |
| 10902 | MYPOP        | 1.05 | 6.85E-02 | 2.41E-01 | 447.25   | not significant |
| 10903 | SAC3D1       | 1.05 | 6.34E-02 | 2.29E-01 | 1086.13  | not significant |
| 10904 | PKD2         | 1.05 | 6.81E-02 | 2.41E-01 | 684.51   | not significant |
| 10905 | SF3A2        | 1.05 | 1.08E-02 | 7.03E-02 | 6583.81  | not significant |
| 10906 | IFI27L2      | 1.05 | 5.32E-02 | 2.05E-01 | 263.11   | not significant |
| 10907 | PTDSS1       | 1.05 | 1.19E-02 | 7.53E-02 | 5153.11  | not significant |
| 10908 | TMEM161A     | 1.05 | 5.40E-02 | 2.08E-01 | 1229.40  | not significant |
| 10909 | SH3GLB2      | 1.05 | 5.07E-02 | 1.99E-01 | 1540.96  | not significant |
| 10910 | R3HDM2       | 1.05 | 4.38E-02 | 1.81E-01 | 1766.95  | not significant |
| 10911 | B2M          | 1.05 | 4.76E-03 | 3.91E-02 | 26571.96 | not significant |
| 10912 | METTL3       | 1.05 | 6.04E-02 | 2.22E-01 | 1361.87  | not significant |
| 10913 | LYSMD1       | 1.05 | 6.78E-02 | 2.40E-01 | 496.29   | not significant |
| 10914 | TLR3         | 1.05 | 5.62E-02 | 2.13E-01 | 356.28   | not significant |
| 10915 | PABPC1       | 1.05 | 2.32E-03 | 2.38E-02 | 52464.32 | not significant |
| 10916 | 43529_13977  | 1.05 | 4.21E-02 | 1.75E-01 | 1850.34  | not significant |
| 10917 | MGC72080     | 1.05 | 6.25E-02 | 2.27E-01 | 372.93   | not significant |
| 10918 | SIGMAR1      | 1.05 | 2.54E-02 | 1.26E-01 | 3260.53  | not significant |
| 10919 | SLFN11       | 1.05 | 9.58E-03 | 6.46E-02 | 6831.92  | not significant |
| 10920 | CASD1        | 1.05 | 3.93E-02 | 1.67E-01 | 2245.45  | not significant |
| 10921 | METTL23      | 1.05 | 6.00E-02 | 2.21E-01 | 902.13   | not significant |
| 10922 | TRADD        | 1.05 | 5.86E-02 | 2.18E-01 | 351.35   | not significant |
| 10923 | ITGB1        | 1.05 | 1.53E-02 | 9.01E-02 | 5542.58  | not significant |
| 10924 | EPHB6        | 1.05 | 2.29E-02 | 1.18E-01 | 2947.08  | not significant |
| 10925 | ZFAND2B      | 1.05 | 6.18E-02 | 2.26E-01 | 866.51   | not significant |
| 10926 | TAPBP1       | 1.05 | 5.72E-02 | 2.15E-01 | 943.67   | not significant |
| 10927 | CTBP1-AS2    | 1.05 | 6.47E-02 | 2.32E-01 | 656.91   | not significant |
| 10928 | DDX12P       | 1.05 | 6.42E-02 | 2.31E-01 | 949.37   | not significant |
| 10929 | ANKRA2       | 1.05 | 6.32E-02 | 2.29E-01 | 367.59   | not significant |
| 10930 | INPP5E       | 1.05 | 6.21E-02 | 2.26E-01 | 767.18   | not significant |
| 10931 | RFX1         | 1.05 | 6.17E-02 | 2.26E-01 | 808.62   | not significant |
| 10932 | LOC100505812 | 1.05 | 5.66E-02 | 2.13E-01 | 297.45   | not significant |
| 10933 | PDDC1        | 1.05 | 3.63E-02 | 1.59E-01 | 1885.45  | not significant |
| 10934 | LOC148413    | 1.05 | 6.14E-02 | 2.25E-01 | 766.88   | not significant |
| 10935 | ZNF627       | 1.05 | 6.36E-02 | 2.30E-01 | 381.31   | not significant |
| 10936 | AMIGO2       | 1.05 | 3.90E-02 | 1.67E-01 | 203.98   | not significant |
| 10937 | SPCS3        | 1.05 | 4.74E-03 | 3.89E-02 | 10066.43 | not significant |
| 10938 | CXCR4        | 1.05 | 1.27E-02 | 7.86E-02 | 5235.71  | not significant |
| 10939 | DDOST        | 1.05 | 6.61E-03 | 4.99E-02 | 7519.84  | not significant |
| 10940 | C1orf43      | 1.05 | 1.91E-02 | 1.04E-01 | 7392.73  | not significant |
| 10941 | CEP192       | 1.05 | 4.01E-02 | 1.70E-01 | 2683.32  | not significant |
| 10942 | PUSL1        | 1.05 | 5.99E-02 | 2.21E-01 | 880.20   | not significant |
| 10943 | FBXL4        | 1.05 | 6.46E-02 | 2.32E-01 | 624.14   | not significant |
| 10944 | GCDH         | 1.05 | 5.12E-02 | 2.00E-01 | 1329.39  | not significant |
| 10945 | PQLC3        | 1.05 | 6.30E-02 | 2.28E-01 | 562.41   | not significant |
| 10946 | KIAA0430     | 1.05 | 3.90E-02 | 1.67E-01 | 2718.14  | not significant |
| 10947 | PPOX         | 1.05 | 6.25E-02 | 2.27E-01 | 434.91   | not significant |
| 10948 | CD44         | 1.05 | 6.32E-02 | 2.29E-01 | 683.46   | not significant |
| 10949 | MPND         | 1.05 | 6.43E-02 | 2.31E-01 | 609.93   | not significant |
| 10950 | RNF167       | 1.05 | 1.90E-02 | 1.03E-01 | 4072.16  | not significant |
| 10951 | BFAR         | 1.05 | 2.87E-02 | 1.36E-01 | 2374.67  | not significant |
| 10952 | GMPR2        | 1.05 | 4.64E-02 | 1.87E-01 | 1453.18  | not significant |
| 10953 | CEP44        | 1.05 | 5.84E-02 | 2.18E-01 | 845.28   | not significant |
| 10954 | GLTSCR1L     | 1.05 | 6.00E-02 | 2.21E-01 | 1019.36  | not significant |
| 10955 | RNF7         | 1.05 | 5.20E-02 | 2.02E-01 | 1401.73  | not significant |
| 10956 | SIGIRR       | 1.05 | 4.76E-02 | 1.90E-01 | 1310.64  | not significant |
| 10957 | NSUN5P2      | 1.05 | 1.56E-02 | 9.12E-02 | 108.65   | not significant |
| 10958 | TMEM101      | 1.05 | 6.18E-02 | 2.26E-01 | 467.48   | not significant |
| 10959 | ITM2A        | 1.05 | 1.61E-02 | 9.29E-02 | 10577.37 | not significant |
| 10960 | C16orf59     | 1.05 | 5.22E-02 | 2.02E-01 | 990.66   | not significant |
| 10961 | CCNT2        | 1.05 | 2.88E-02 | 1.36E-01 | 2314.42  | not significant |
| 10962 | SCN9A        | 1.05 | 4.69E-02 | 1.89E-01 | 2702.90  | not significant |
| 10963 | GMNN         | 1.05 | 1.88E-02 | 1.03E-01 | 4060.33  | not significant |
| 10964 | HM13         | 1.05 | 1.09E-02 | 7.07E-02 | 5381.00  | not significant |
| 10965 | PNPLA2       | 1.05 | 5.27E-02 | 2.04E-01 | 1200.78  | not significant |
| 10966 | OXA1L        | 1.05 | 2.22E-02 | 1.15E-01 | 2850.53  | not significant |
| 10967 | ZNF768       | 1.05 | 6.07E-02 | 2.23E-01 | 406.41   | not significant |
| 10968 | ST3GAL1      | 1.05 | 3.06E-02 | 1.42E-01 | 2420.48  | not significant |
| 10969 | ACADVL       | 1.05 | 9.27E-03 | 6.30E-02 | 5215.10  | not significant |
| 10970 | EEF2         | 1.05 | 7.20E-03 | 5.30E-02 | 77450.90 | not significant |
| 10971 | MED30        | 1.05 | 4.87E-02 | 1.93E-01 | 1153.53  | not significant |
| 10972 | TPP1         | 1.05 | 3.79E-02 | 1.64E-01 | 2718.17  | not significant |
| 10973 | BANF1        | 1.05 | 4.00E-02 | 1.70E-01 | 3158.45  | not significant |
| 10974 | ANKRD36B     | 1.05 | 3.38E-02 | 1.51E-01 | 225.00   | not significant |
| 10975 | METTL17      | 1.05 | 2.90E-02 | 1.37E-01 | 2514.90  | not significant |
| 10976 | HDAC10       | 1.05 | 4.81E-02 | 1.92E-01 | 1123.64  | not significant |
| 10977 | RRN3P3       | 1.05 | 3.21E-02 | 1.46E-01 | 185.77   | not significant |
| 10978 | PXMP2        | 1.05 | 5.14E-02 | 2.00E-01 | 1318.08  | not significant |
| 10979 | TCF19        | 1.05 | 5.23E-02 | 2.03E-01 | 903.61   | not significant |
| 10980 | ANKRD13A     | 1.05 | 1.17E-02 | 7.43E-02 | 4260.46  | not significant |
| 10981 | PIEZO1       | 1.05 | 2.56E-02 | 1.27E-01 | 11081.59 | not significant |
| 10982 | SLC12A6      | 1.05 | 4.42E-02 | 1.82E-01 | 2866.21  | not significant |
| 10983 | NUDT16L1     | 1.05 | 5.46E-02 | 2.09E-01 | 984.61   | not significant |
| 10984 | MFSD8        | 1.05 | 6.03E-02 | 2.22E-01 | 612.26   | not significant |
| 10985 | ACAP1        | 1.05 | 1.34E-02 | 8.17E-02 | 5058.15  | not significant |
| 10986 | TRMT1        | 1.05 | 2.94E-02 | 1.38E-01 | 2740.58  | not significant |
| 10987 | CR2          | 1.05 | 5.91E-02 | 2.20E-01 | 520.14   | not significant |



|       |           |      |          |          |          |                 |
|-------|-----------|------|----------|----------|----------|-----------------|
| 10988 | COX6C     | 1.05 | 3.41E-02 | 1.52E-01 | 3941.98  | not significant |
| 10989 | ALDH16A1  | 1.05 | 4.35E-02 | 1.80E-01 | 1411.20  | not significant |
| 10990 | IDH3G     | 1.05 | 4.94E-02 | 1.95E-01 | 1078.14  | not significant |
| 10991 | CYLD      | 1.05 | 5.12E-02 | 2.00E-01 | 977.31   | not significant |
| 10992 | TNKS2     | 1.05 | 2.06E-02 | 1.09E-01 | 3503.30  | not significant |
| 10993 | PPP1R16B  | 1.05 | 3.03E-02 | 1.41E-01 | 3171.41  | not significant |
| 10994 | LPIN2     | 1.05 | 2.69E-02 | 1.30E-01 | 2342.52  | not significant |
| 10995 | ANKRD26   | 1.05 | 5.75E-02 | 2.16E-01 | 812.82   | not significant |
| 10996 | PGAP3     | 1.05 | 5.61E-02 | 2.12E-01 | 364.61   | not significant |
| 10997 | BUD13     | 1.05 | 3.64E-02 | 1.59E-01 | 1695.37  | not significant |
| 10998 | FAM160B2  | 1.05 | 3.91E-02 | 1.67E-01 | 1524.76  | not significant |
| 10999 | NPC1      | 1.05 | 5.05E-02 | 1.99E-01 | 1161.72  | not significant |
| 11000 | C8orf88   | 1.05 | 4.90E-02 | 1.94E-01 | 959.94   | not significant |
| 11001 | APLP2     | 1.05 | 8.96E-03 | 6.16E-02 | 4912.17  | not significant |
| 11002 | VILL      | 1.05 | 5.19E-02 | 2.02E-01 | 852.47   | not significant |
| 11003 | TOM1      | 1.05 | 5.76E-02 | 2.16E-01 | 687.84   | not significant |
| 11004 | ARMCX6    | 1.05 | 2.83E-02 | 1.35E-01 | 156.23   | not significant |
| 11005 | GINM1     | 1.05 | 5.97E-02 | 2.21E-01 | 590.45   | not significant |
| 11006 | MRPL57    | 1.05 | 4.48E-02 | 1.83E-01 | 2176.60  | not significant |
| 11007 | ZNF837    | 1.05 | 2.35E-02 | 1.20E-01 | 142.91   | not significant |
| 11008 | BCAP31    | 1.05 | 2.28E-02 | 1.18E-01 | 2583.10  | not significant |
| 11009 | CTSA      | 1.05 | 2.81E-02 | 1.34E-01 | 2178.58  | not significant |
| 11010 | TRAPPC5   | 1.05 | 5.44E-02 | 2.08E-01 | 818.90   | not significant |
| 11011 | CLCN6     | 1.05 | 5.42E-02 | 2.08E-01 | 735.16   | not significant |
| 11012 | CCBL1     | 1.05 | 4.64E-02 | 1.87E-01 | 260.40   | not significant |
| 11013 | SNX14     | 1.05 | 4.64E-02 | 1.87E-01 | 989.49   | not significant |
| 11014 | ARL4C     | 1.05 | 2.63E-03 | 2.58E-02 | 11919.76 | not significant |
| 11015 | ELF1      | 1.05 | 1.35E-02 | 8.19E-02 | 4927.48  | not significant |
| 11016 | ZNF451    | 1.05 | 3.00E-02 | 1.40E-01 | 1954.25  | not significant |
| 11017 | FAM110A   | 1.05 | 5.20E-02 | 2.02E-01 | 722.22   | not significant |
| 11018 | TRIP10    | 1.05 | 3.21E-02 | 1.46E-01 | 168.28   | not significant |
| 11019 | C11orf31  | 1.05 | 3.65E-02 | 1.59E-01 | 3363.59  | not significant |
| 11020 | CHMP5     | 1.05 | 4.29E-02 | 1.78E-01 | 1277.79  | not significant |
| 11021 | MVK       | 1.05 | 5.60E-02 | 2.12E-01 | 702.51   | not significant |
| 11022 | DENND4C   | 1.05 | 3.24E-02 | 1.47E-01 | 2298.23  | not significant |
| 11023 | EDEM2     | 1.05 | 3.80E-02 | 1.64E-01 | 1434.91  | not significant |
| 11024 | TOR2A     | 1.05 | 5.31E-02 | 2.05E-01 | 747.37   | not significant |
| 11025 | ZNF581    | 1.05 | 5.74E-02 | 2.16E-01 | 553.24   | not significant |
| 11026 | SECISBP2  | 1.05 | 3.76E-02 | 1.63E-01 | 1658.07  | not significant |
| 11027 | IRF2      | 1.05 | 3.75E-02 | 1.63E-01 | 1472.07  | not significant |
| 11028 | CNNM3     | 1.05 | 3.29E-02 | 1.48E-01 | 2139.73  | not significant |
| 11029 | HSPB1     | 1.05 | 4.31E-02 | 1.79E-01 | 2123.06  | not significant |
| 11030 | PYHIN1    | 1.05 | 4.40E-02 | 1.81E-01 | 1022.45  | not significant |
| 11031 | PABPN1    | 1.05 | 5.58E-02 | 2.12E-01 | 598.65   | not significant |
| 11032 | MESDC2    | 1.05 | 2.01E-02 | 1.07E-01 | 2416.80  | not significant |
| 11033 | SUN2      | 1.05 | 2.33E-02 | 1.19E-01 | 2584.89  | not significant |
| 11034 | MRPL10    | 1.05 | 4.49E-02 | 1.84E-01 | 1273.89  | not significant |
| 11035 | SPECC1L   | 1.05 | 4.17E-02 | 1.74E-01 | 1235.57  | not significant |
| 11036 | PYGO2     | 1.05 | 2.53E-02 | 1.26E-01 | 2026.82  | not significant |
| 11037 | INF2      | 1.05 | 2.61E-02 | 1.28E-01 | 2822.27  | not significant |
| 11038 | HSD17B7P2 | 1.05 | 1.69E-02 | 9.60E-02 | 136.24   | not significant |
| 11039 | POLD4     | 1.05 | 5.34E-02 | 2.06E-01 | 424.19   | not significant |
| 11040 | PP7080    | 1.05 | 4.94E-02 | 1.95E-01 | 701.91   | not significant |
| 11041 | LAPTM4A   | 1.05 | 3.83E-02 | 1.65E-01 | 1326.22  | not significant |
| 11042 | KDSR      | 1.05 | 3.78E-02 | 1.63E-01 | 1501.94  | not significant |
| 11043 | GNE       | 1.05 | 3.35E-02 | 1.50E-01 | 1406.63  | not significant |
| 11044 | LMBR1L    | 1.05 | 4.55E-02 | 1.85E-01 | 861.67   | not significant |
| 11045 | CAMK4     | 1.05 | 4.73E-02 | 1.89E-01 | 1006.62  | not significant |
| 11046 | HINT1     | 1.05 | 1.90E-02 | 1.03E-01 | 10722.84 | not significant |
| 11047 | RRM1      | 1.05 | 1.95E-03 | 2.07E-02 | 12052.51 | not significant |
| 11048 | EEF1D     | 1.05 | 1.60E-02 | 9.26E-02 | 13490.60 | not significant |
| 11049 | TM9SF1    | 1.05 | 3.60E-02 | 1.58E-01 | 1288.69  | not significant |
| 11050 | MFSD1     | 1.05 | 4.21E-02 | 1.75E-01 | 982.37   | not significant |
| 11051 | AMOT      | 1.05 | 4.99E-02 | 1.97E-01 | 803.78   | not significant |
| 11052 | MF12      | 1.05 | 4.08E-02 | 1.72E-01 | 260.68   | not significant |
| 11053 | LEM2      | 1.05 | 1.95E-02 | 1.05E-01 | 2419.37  | not significant |
| 11054 | TNFSF10   | 1.05 | 1.50E-03 | 1.72E-02 | 11663.60 | not significant |
| 11055 | TRIOBP    | 1.05 | 3.26E-02 | 1.47E-01 | 1398.99  | not significant |
| 11056 | DPH1      | 1.05 | 5.14E-02 | 2.00E-01 | 425.97   | not significant |
| 11057 | TMEM261   | 1.05 | 8.29E-02 | 2.73E-01 | 2790.39  | not significant |
| 11058 | BLM       | 1.05 | 2.21E-02 | 1.15E-01 | 2611.24  | not significant |
| 11059 | ACTG1     | 1.05 | 5.10E-03 | 4.11E-02 | 18848.48 | not significant |
| 11060 | PQLC1     | 1.05 | 3.22E-02 | 1.46E-01 | 1371.50  | not significant |
| 11061 | UFL1      | 1.05 | 2.79E-02 | 1.34E-01 | 2191.94  | not significant |
| 11062 | LINC00265 | 1.05 | 5.04E-02 | 1.98E-01 | 466.88   | not significant |
| 11063 | THG1L     | 1.05 | 5.06E-02 | 1.99E-01 | 484.13   | not significant |
| 11064 | UBXN6     | 1.05 | 2.66E-02 | 1.29E-01 | 1855.27  | not significant |
| 11065 | FAM65B    | 1.05 | 2.58E-02 | 1.27E-01 | 1856.41  | not significant |
| 11066 | RECK      | 1.05 | 4.80E-02 | 1.91E-01 | 690.08   | not significant |
| 11067 | IKBKB     | 1.05 | 1.62E-02 | 9.34E-02 | 2631.31  | not significant |
| 11068 | CKLF      | 1.05 | 4.39E-02 | 1.81E-01 | 979.09   | not significant |
| 11069 | NT5C3A    | 1.05 | 4.03E-02 | 1.70E-01 | 1040.81  | not significant |
| 11070 | RAB32     | 1.05 | 4.96E-02 | 1.96E-01 | 705.47   | not significant |
| 11071 | CUTA      | 1.06 | 3.51E-02 | 1.56E-01 | 1321.77  | not significant |
| 11072 | TTYH3     | 1.06 | 1.60E-02 | 9.29E-02 | 3014.37  | not significant |
| 11073 | IGF2R     | 1.06 | 2.09E-02 | 1.10E-01 | 6631.22  | not significant |
| 11074 | P4HA1     | 1.06 | 2.89E-02 | 1.37E-01 | 1517.47  | not significant |
| 11075 | UTY       | 1.06 | 3.87E-02 | 1.66E-01 | 1014.65  | not significant |

|       |           |      |          |          |          |                 |
|-------|-----------|------|----------|----------|----------|-----------------|
| 11076 | RAB33A    | 1.06 | 4.37E-02 | 1.81E-01 | 286.45   | not significant |
| 11077 | SNRNP70   | 1.06 | 6.16E-03 | 4.73E-02 | 8767.49  | not significant |
| 11078 | C4orf46   | 1.06 | 1.92E-02 | 1.04E-01 | 2703.59  | not significant |
| 11079 | PASK      | 1.06 | 3.47E-02 | 1.55E-01 | 1464.18  | not significant |
| 11080 | RING1     | 1.06 | 4.89E-02 | 1.94E-01 | 425.25   | not significant |
| 11081 | ULBP2     | 1.06 | 2.26E-02 | 1.17E-01 | 154.87   | not significant |
| 11082 | CNIH1     | 1.06 | 2.24E-02 | 1.16E-01 | 3094.12  | not significant |
| 11083 | KCTD13    | 1.06 | 4.86E-02 | 1.93E-01 | 519.10   | not significant |
| 11084 | MRPL33    | 1.06 | 4.03E-02 | 1.70E-01 | 1127.34  | not significant |
| 11085 | MYADM     | 1.06 | 3.43E-02 | 1.53E-01 | 1420.14  | not significant |
| 11086 | TPCN2     | 1.06 | 4.83E-02 | 1.92E-01 | 514.78   | not significant |
| 11087 | MARCKSL1  | 1.06 | 3.06E-03 | 2.87E-02 | 10069.97 | not significant |
| 11088 | MINT      | 1.06 | 4.65E-02 | 1.87E-01 | 716.20   | not significant |
| 11089 | HERC5     | 1.06 | 2.24E-02 | 1.16E-01 | 1924.46  | not significant |
| 11090 | ZNF219    | 1.06 | 4.58E-02 | 1.86E-01 | 727.27   | not significant |
| 11091 | CUL9      | 1.06 | 3.14E-02 | 1.44E-01 | 1712.01  | not significant |
| 11092 | ANO6      | 1.06 | 1.95E-02 | 1.05E-01 | 3838.03  | not significant |
| 11093 | C12orf57  | 1.06 | 4.70E-02 | 1.89E-01 | 403.06   | not significant |
| 11094 | TMX3      | 1.06 | 2.02E-02 | 1.07E-01 | 3434.24  | not significant |
| 11095 | FRAT2     | 1.06 | 4.30E-02 | 1.79E-01 | 298.69   | not significant |
| 11096 | CALCOCO2  | 1.06 | 6.79E-03 | 5.08E-02 | 3994.23  | not significant |
| 11097 | MPLKIP    | 1.06 | 3.97E-02 | 1.69E-01 | 981.27   | not significant |
| 11098 | HTRA2     | 1.06 | 3.12E-02 | 1.44E-01 | 1427.79  | not significant |
| 11099 | PCBP4     | 1.06 | 4.33E-02 | 1.79E-01 | 320.79   | not significant |
| 11100 | SYCP2     | 1.06 | 2.55E-02 | 1.26E-01 | 2642.36  | not significant |
| 11101 | KDM5D     | 1.06 | 1.52E-02 | 8.97E-02 | 3113.63  | not significant |
| 11102 | APAF1     | 1.06 | 2.35E-02 | 1.20E-01 | 1688.98  | not significant |
| 11103 | UBE2J1    | 1.06 | 1.95E-02 | 1.05E-01 | 1875.59  | not significant |
| 11104 | USF2      | 1.06 | 1.39E-02 | 8.40E-02 | 3031.83  | not significant |
| 11105 | PCGF3     | 1.06 | 1.73E-02 | 9.69E-02 | 2132.35  | not significant |
| 11106 | PRTFDC1   | 1.06 | 3.86E-02 | 1.66E-01 | 859.15   | not significant |
| 11107 | ADD3      | 1.06 | 3.39E-03 | 3.05E-02 | 6219.69  | not significant |
| 11108 | GMFG      | 1.06 | 2.55E-02 | 1.26E-01 | 2781.33  | not significant |
| 11109 | GNS       | 1.06 | 1.33E-02 | 8.12E-02 | 3622.23  | not significant |
| 11110 | GLI4      | 1.06 | 4.56E-02 | 1.85E-01 | 522.26   | not significant |
| 11111 | EIF3L     | 1.06 | 4.29E-03 | 3.64E-02 | 9752.78  | not significant |
| 11112 | MMAB      | 1.06 | 3.03E-02 | 1.41E-01 | 1441.58  | not significant |
| 11113 | GSTK1     | 1.06 | 2.44E-02 | 1.23E-01 | 1635.16  | not significant |
| 11114 | N4BP2L2   | 1.06 | 2.31E-02 | 1.19E-01 | 1853.71  | not significant |
| 11115 | VIPAS39   | 1.06 | 3.67E-02 | 1.60E-01 | 884.55   | not significant |
| 11116 | FAS       | 1.06 | 4.10E-02 | 1.72E-01 | 928.79   | not significant |
| 11117 | ETS1      | 1.06 | 3.89E-03 | 3.37E-02 | 15177.88 | not significant |
| 11118 | FURIN     | 1.06 | 2.97E-02 | 1.39E-01 | 1240.07  | not significant |
| 11119 | PHYKPL    | 1.06 | 3.86E-02 | 1.66E-01 | 784.66   | not significant |
| 11120 | TMEM254   | 1.06 | 4.61E-02 | 1.87E-01 | 535.81   | not significant |
| 11121 | ABCC10    | 1.06 | 4.18E-02 | 1.75E-01 | 825.46   | not significant |
| 11122 | UHRF2     | 1.06 | 1.40E-02 | 8.42E-02 | 2363.19  | not significant |
| 11123 | BCKDHB    | 1.06 | 3.64E-02 | 1.59E-01 | 883.86   | not significant |
| 11124 | RCSD1     | 1.06 | 4.32E-03 | 3.65E-02 | 4559.90  | not significant |
| 11125 | TBCA      | 1.06 | 2.60E-02 | 1.28E-01 | 3377.73  | not significant |
| 11126 | NFIC      | 1.06 | 3.19E-02 | 1.46E-01 | 1022.37  | not significant |
| 11127 | C8orf82   | 1.06 | 4.36E-02 | 1.80E-01 | 634.08   | not significant |
| 11128 | GIMAP1    | 1.06 | 7.03E-03 | 5.23E-02 | 3584.51  | not significant |
| 11129 | PLCG1     | 1.06 | 2.84E-03 | 2.71E-02 | 10576.61 | not significant |
| 11130 | PRR12     | 1.06 | 1.11E-02 | 7.17E-02 | 3031.29  | not significant |
| 11131 | CLUHP3    | 1.06 | 3.75E-02 | 1.63E-01 | 313.03   | not significant |
| 11132 | PARP2     | 1.06 | 2.18E-02 | 1.14E-01 | 1606.76  | not significant |
| 11133 | BAI2      | 1.06 | 3.70E-02 | 1.61E-01 | 892.08   | not significant |
| 11134 | LDLR      | 1.06 | 1.55E-02 | 9.10E-02 | 2870.29  | not significant |
| 11135 | UBXN1     | 1.06 | 3.05E-02 | 1.41E-01 | 2228.16  | not significant |
| 11136 | NIT1      | 1.06 | 3.60E-02 | 1.58E-01 | 825.98   | not significant |
| 11137 | CKS1B     | 1.06 | 3.79E-02 | 1.64E-01 | 1273.25  | not significant |
| 11138 | ZNF32     | 1.06 | 3.95E-02 | 1.68E-01 | 819.64   | not significant |
| 11139 | RNF44     | 1.06 | 6.51E-03 | 4.92E-02 | 3928.29  | not significant |
| 11140 | OARD1     | 1.06 | 3.60E-02 | 1.58E-01 | 893.34   | not significant |
| 11141 | ALDH6A1   | 1.06 | 4.32E-02 | 1.79E-01 | 477.41   | not significant |
| 11142 | GCSAM     | 1.06 | 4.29E-02 | 1.78E-01 | 577.68   | not significant |
| 11143 | HERPUD2   | 1.06 | 3.40E-02 | 1.52E-01 | 1027.93  | not significant |
| 11144 | MEGF8     | 1.06 | 3.59E-02 | 1.58E-01 | 891.27   | not significant |
| 11145 | RAD52     | 1.06 | 3.96E-02 | 1.69E-01 | 744.53   | not significant |
| 11146 | CHAF1B    | 1.06 | 1.36E-02 | 8.26E-02 | 2224.92  | not significant |
| 11147 | USP49     | 1.06 | 1.54E-02 | 9.07E-02 | 3045.63  | not significant |
| 11148 | MUM1      | 1.06 | 3.04E-02 | 1.41E-01 | 1167.44  | not significant |
| 11149 | ZNF512    | 1.06 | 1.06E-02 | 6.92E-02 | 2551.28  | not significant |
| 11150 | DTX3      | 1.06 | 1.87E-02 | 1.02E-01 | 1644.36  | not significant |
| 11151 | SLC25A5   | 1.06 | 7.87E-03 | 5.66E-02 | 17168.10 | not significant |
| 11152 | DENND5A   | 1.06 | 1.05E-02 | 6.88E-02 | 2905.88  | not significant |
| 11153 | RPL13A    | 1.06 | 1.42E-02 | 8.50E-02 | 4552.05  | not significant |
| 11154 | GPR108    | 1.06 | 2.29E-02 | 1.18E-01 | 1523.09  | not significant |
| 11155 | HPCAL1    | 1.06 | 2.67E-02 | 1.30E-01 | 1154.78  | not significant |
| 11156 | RPS15A    | 1.06 | 7.86E-03 | 5.66E-02 | 10764.88 | not significant |
| 11157 | GBP3      | 1.06 | 3.86E-02 | 1.65E-01 | 663.65   | not significant |
| 11158 | CTBS      | 1.06 | 4.02E-02 | 1.70E-01 | 542.61   | not significant |
| 11159 | FLJ32255  | 1.06 | 3.92E-02 | 1.67E-01 | 597.03   | not significant |
| 11160 | LINC00649 | 1.06 | 4.06E-02 | 1.71E-01 | 519.57   | not significant |
| 11161 | ALOX5AP   | 1.06 | 1.68E-02 | 9.55E-02 | 1828.57  | not significant |
| 11162 | CD47      | 1.06 | 1.39E-03 | 1.63E-02 | 8991.74  | not significant |
| 11163 | WDR6      | 1.06 | 1.25E-03 | 1.49E-02 | 8092.90  | not significant |

|       |            |      |          |          |          |                 |
|-------|------------|------|----------|----------|----------|-----------------|
| 11164 | PIK3C3     | 1.06 | 3.24E-02 | 1.47E-01 | 855.64   | not significant |
| 11165 | CENPU      | 1.06 | 8.94E-03 | 6.16E-02 | 3775.33  | not significant |
| 11166 | TRAM1      | 1.06 | 1.45E-03 | 1.67E-02 | 16569.00 | not significant |
| 11167 | CNOT6L     | 1.06 | 1.73E-02 | 9.72E-02 | 1706.33  | not significant |
| 11168 | NPHP4      | 1.06 | 2.40E-02 | 1.21E-01 | 1214.67  | not significant |
| 11169 | POLI       | 1.06 | 3.52E-02 | 1.56E-01 | 287.63   | not significant |
| 11170 | E2F7       | 1.06 | 2.30E-02 | 1.18E-01 | 2160.38  | not significant |
| 11171 | REC8       | 1.06 | 3.63E-02 | 1.59E-01 | 640.70   | not significant |
| 11172 | KBTD2      | 1.06 | 1.74E-02 | 9.75E-02 | 2014.25  | not significant |
| 11173 | SPTBN1     | 1.06 | 5.20E-02 | 2.02E-01 | 17731.68 | not significant |
| 11174 | SUN1       | 1.06 | 1.45E-02 | 8.64E-02 | 2415.52  | not significant |
| 11175 | FANCE      | 1.06 | 3.51E-02 | 1.56E-01 | 657.91   | not significant |
| 11176 | HERC2      | 1.06 | 1.89E-02 | 1.03E-01 | 2164.66  | not significant |
| 11177 | PRSS21     | 1.06 | 3.33E-02 | 1.50E-01 | 732.93   | not significant |
| 11178 | ZNF37BP    | 1.06 | 3.50E-02 | 1.56E-01 | 1184.96  | not significant |
| 11179 | TOX        | 1.06 | 1.03E-03 | 1.30E-02 | 7153.24  | not significant |
| 11180 | MOAP1      | 1.06 | 2.42E-02 | 1.22E-01 | 1132.48  | not significant |
| 11181 | TUSC3      | 1.06 | 1.18E-02 | 7.48E-02 | 2036.36  | not significant |
| 11182 | SEPSECS    | 1.06 | 3.22E-02 | 1.46E-01 | 750.16   | not significant |
| 11183 | TMX1       | 1.06 | 5.20E-03 | 4.16E-02 | 4778.17  | not significant |
| 11184 | PLCB2      | 1.06 | 2.67E-02 | 1.30E-01 | 1518.15  | not significant |
| 11185 | MXD4       | 1.06 | 3.83E-02 | 1.65E-01 | 362.89   | not significant |
| 11186 | TREX1      | 1.06 | 3.80E-02 | 1.64E-01 | 378.54   | not significant |
| 11187 | NFKBIA     | 1.06 | 2.47E-02 | 1.24E-01 | 1168.21  | not significant |
| 11188 | DDT        | 1.06 | 3.85E-02 | 1.65E-01 | 514.53   | not significant |
| 11189 | C19orf48   | 1.06 | 3.76E-03 | 3.28E-02 | 5214.49  | not significant |
| 11190 | RAD54L     | 1.06 | 3.71E-03 | 3.26E-02 | 4097.25  | not significant |
| 11191 | TRIB2      | 1.06 | 1.21E-03 | 1.46E-02 | 6873.13  | not significant |
| 11192 | DENND4B    | 1.06 | 6.99E-03 | 5.21E-02 | 4555.61  | not significant |
| 11193 | RNASEH2A   | 1.06 | 2.08E-02 | 1.10E-01 | 2381.96  | not significant |
| 11194 | CENPJ      | 1.06 | 2.59E-02 | 1.28E-01 | 1131.37  | not significant |
| 11195 | RUFY3      | 1.06 | 1.81E-02 | 1.00E-01 | 1805.12  | not significant |
| 11196 | SNAPC3     | 1.06 | 1.96E-02 | 1.05E-01 | 1441.97  | not significant |
| 11197 | CCBL2      | 1.06 | 3.32E-02 | 1.49E-01 | 664.13   | not significant |
| 11198 | CCDC14     | 1.06 | 8.55E-03 | 5.96E-02 | 3001.16  | not significant |
| 11199 | COX8A      | 1.06 | 1.31E-02 | 8.04E-02 | 5110.82  | not significant |
| 11200 | IL12RB1    | 1.06 | 2.10E-02 | 1.11E-01 | 1249.55  | not significant |
| 11201 | CYB561D2   | 1.06 | 3.61E-02 | 1.59E-01 | 642.27   | not significant |
| 11202 | STAT3      | 1.06 | 8.41E-04 | 1.12E-02 | 10114.25 | not significant |
| 11203 | ERGC3      | 1.06 | 5.09E-03 | 4.10E-02 | 3739.27  | not significant |
| 11204 | ARL6IP4    | 1.06 | 1.08E-02 | 7.01E-02 | 4537.38  | not significant |
| 11205 | PCNXL4     | 1.06 | 8.99E-03 | 6.18E-02 | 3800.46  | not significant |
| 11206 | NAGLU      | 1.06 | 2.77E-02 | 1.33E-01 | 228.46   | not significant |
| 11207 | PIK3CG     | 1.06 | 1.42E-02 | 8.53E-02 | 2293.99  | not significant |
| 11208 | MAFG       | 1.06 | 1.08E-02 | 7.05E-02 | 2072.97  | not significant |
| 11209 | STRIP2     | 1.06 | 3.56E-02 | 1.57E-01 | 417.91   | not significant |
| 11210 | CDCA7L     | 1.06 | 1.14E-03 | 1.40E-02 | 5972.59  | not significant |
| 11211 | CLEC2B     | 1.06 | 3.64E-02 | 1.59E-01 | 432.26   | not significant |
| 11212 | PSMG2      | 1.06 | 1.60E-02 | 9.26E-02 | 2020.14  | not significant |
| 11213 | IPO8       | 1.06 | 1.27E-02 | 7.84E-02 | 2228.62  | not significant |
| 11214 | ATF3       | 1.06 | 2.38E-02 | 1.21E-01 | 998.85   | not significant |
| 11215 | TFAP2C     | 1.06 | 3.60E-02 | 1.58E-01 | 545.73   | not significant |
| 11216 | LAMP1      | 1.06 | 3.17E-03 | 2.94E-02 | 5541.58  | not significant |
| 11217 | HDHD2      | 1.06 | 1.41E-02 | 8.48E-02 | 1856.64  | not significant |
| 11218 | KIAA0195   | 1.06 | 4.16E-03 | 3.55E-02 | 4269.91  | not significant |
| 11219 | ZSCAN2     | 1.06 | 3.59E-02 | 1.58E-01 | 443.41   | not significant |
| 11220 | RFX5       | 1.06 | 7.32E-03 | 5.37E-02 | 2923.38  | not significant |
| 11221 | SIX3       | 1.06 | 2.98E-02 | 1.40E-01 | 738.94   | not significant |
| 11222 | ZRSR2      | 1.06 | 3.34E-02 | 1.50E-01 | 283.67   | not significant |
| 11223 | FKBP11     | 1.06 | 2.96E-02 | 1.39E-01 | 840.69   | not significant |
| 11224 | WIP1       | 1.06 | 3.56E-02 | 1.57E-01 | 424.13   | not significant |
| 11225 | TMEM18     | 1.06 | 2.34E-02 | 1.20E-01 | 1521.43  | not significant |
| 11226 | MYO18A     | 1.06 | 5.06E-03 | 4.09E-02 | 2958.75  | not significant |
| 11227 | PLEKHG2    | 1.06 | 1.77E-02 | 9.86E-02 | 2586.35  | not significant |
| 11228 | EIF4A2     | 1.06 | 5.42E-04 | 8.11E-03 | 10757.94 | not significant |
| 11229 | RBM4       | 1.06 | 2.87E-02 | 1.36E-01 | 781.08   | not significant |
| 11230 | MYB        | 1.06 | 3.02E-04 | 5.25E-03 | 14197.44 | not significant |
| 11231 | PGD        | 1.06 | 1.31E-03 | 1.55E-02 | 10113.34 | not significant |
| 11232 | RHOH       | 1.06 | 5.22E-03 | 4.18E-02 | 3596.74  | not significant |
| 11233 | HAGH       | 1.06 | 3.29E-02 | 1.48E-01 | 901.57   | not significant |
| 11234 | CAPRN2     | 1.06 | 3.16E-02 | 1.45E-01 | 311.06   | not significant |
| 11235 | EMC10      | 1.06 | 6.00E-03 | 4.64E-02 | 3637.28  | not significant |
| 11236 | ST6GAL1    | 1.06 | 9.10E-03 | 6.21E-02 | 3656.18  | not significant |
| 11237 | SYF2       | 1.06 | 1.40E-02 | 8.41E-02 | 1552.10  | not significant |
| 11238 | MAP3K3     | 1.06 | 9.61E-03 | 6.48E-02 | 2127.92  | not significant |
| 11239 | CTDSP2     | 1.06 | 5.34E-04 | 8.07E-03 | 9105.38  | not significant |
| 11240 | ANKZF1     | 1.06 | 2.23E-02 | 1.16E-01 | 994.81   | not significant |
| 11241 | TECR       | 1.06 | 5.08E-03 | 4.10E-02 | 2993.74  | not significant |
| 11242 | DCAF15     | 1.06 | 5.38E-03 | 4.27E-02 | 2869.79  | not significant |
| 11243 | GJC1       | 1.06 | 8.63E-03 | 6.01E-02 | 2226.52  | not significant |
| 11244 | 43531_3536 | 1.06 | 2.63E-03 | 2.58E-02 | 4389.65  | not significant |
| 11245 | VAMP4      | 1.06 | 3.08E-02 | 1.42E-01 | 653.17   | not significant |
| 11246 | ZFYVE16    | 1.06 | 2.74E-02 | 1.32E-01 | 824.99   | not significant |
| 11247 | FLI1       | 1.06 | 5.51E-03 | 4.36E-02 | 2638.44  | not significant |
| 11248 | CD97       | 1.06 | 1.67E-02 | 9.52E-02 | 1303.50  | not significant |
| 11249 | TUBB       | 1.06 | 8.16E-04 | 1.10E-02 | 8262.83  | not significant |
| 11250 | AIP        | 1.06 | 1.52E-02 | 8.99E-02 | 3648.73  | not significant |
| 11251 | SRSF5      | 1.06 | 8.28E-04 | 1.11E-02 | 6745.22  | not significant |

|       |            |      |          |          |          |                 |
|-------|------------|------|----------|----------|----------|-----------------|
| 11252 | NDFIP2     | 1.07 | 2.66E-03 | 2.60E-02 | 3712.89  | not significant |
| 11253 | N4BP2      | 1.07 | 9.25E-03 | 6.29E-02 | 4204.18  | not significant |
| 11254 | PAN2       | 1.07 | 1.97E-02 | 1.05E-01 | 1842.94  | not significant |
| 11255 | SH2B1      | 1.07 | 1.21E-02 | 7.58E-02 | 2004.19  | not significant |
| 11256 | ALG12      | 1.07 | 2.64E-02 | 1.29E-01 | 919.38   | not significant |
| 11257 | LOC146880  | 1.07 | 2.80E-02 | 1.34E-01 | 884.95   | not significant |
| 11258 | STARD3     | 1.07 | 5.80E-03 | 4.53E-02 | 2888.58  | not significant |
| 11259 | NIPAL3     | 1.07 | 3.03E-02 | 1.41E-01 | 703.83   | not significant |
| 11260 | MEN1       | 1.07 | 5.98E-03 | 4.63E-02 | 3544.25  | not significant |
| 11261 | CAPN10     | 1.07 | 2.33E-02 | 1.19E-01 | 907.94   | not significant |
| 11262 | SMPD2      | 1.07 | 3.31E-02 | 1.49E-01 | 449.73   | not significant |
| 11263 | PPM1K      | 1.07 | 1.36E-02 | 8.24E-02 | 1543.35  | not significant |
| 11264 | ATP6V0A2   | 1.07 | 9.38E-03 | 6.35E-02 | 3147.43  | not significant |
| 11265 | LIG1       | 1.07 | 1.02E-03 | 1.30E-02 | 5299.80  | not significant |
| 11266 | PKD1       | 1.07 | 1.01E-02 | 6.67E-02 | 2604.31  | not significant |
| 11267 | TMED4      | 1.07 | 1.30E-02 | 8.01E-02 | 1931.21  | not significant |
| 11268 | ATP6V1H    | 1.07 | 1.39E-02 | 8.40E-02 | 1669.75  | not significant |
| 11269 | DDX17      | 1.07 | 4.35E-03 | 3.67E-02 | 17150.50 | not significant |
| 11270 | HAUS5      | 1.07 | 9.05E-03 | 6.20E-02 | 2028.97  | not significant |
| 11271 | CENPC      | 1.07 | 1.91E-02 | 1.04E-01 | 1133.40  | not significant |
| 11272 | MAN2B1     | 1.07 | 1.74E-02 | 9.76E-02 | 1344.45  | not significant |
| 11273 | CREBRF     | 1.07 | 2.05E-02 | 1.09E-01 | 153.87   | not significant |
| 11274 | MRE11A     | 1.07 | 7.92E-03 | 5.67E-02 | 2272.51  | not significant |
| 11275 | CLN6       | 1.07 | 6.10E-03 | 4.70E-02 | 2314.21  | not significant |
| 11276 | FAM221A    | 1.07 | 3.25E-02 | 1.47E-01 | 355.86   | not significant |
| 11277 | BST2       | 1.07 | 1.58E-02 | 9.23E-02 | 2030.71  | not significant |
| 11278 | TNFRSF25   | 1.07 | 2.95E-02 | 1.39E-01 | 593.46   | not significant |
| 11279 | ENO3       | 1.07 | 2.91E-02 | 1.37E-01 | 257.36   | not significant |
| 11280 | C2orf68    | 1.07 | 1.18E-02 | 7.48E-02 | 1449.36  | not significant |
| 11281 | C11orf30   | 1.07 | 1.58E-02 | 9.20E-02 | 1668.58  | not significant |
| 11282 | ARID5A     | 1.07 | 2.39E-02 | 1.21E-01 | 775.85   | not significant |
| 11283 | AP4M1      | 1.07 | 3.18E-02 | 1.45E-01 | 542.07   | not significant |
| 11284 | RELB       | 1.07 | 3.12E-02 | 1.44E-01 | 333.36   | not significant |
| 11285 | C9orf16    | 1.07 | 2.64E-02 | 1.29E-01 | 971.12   | not significant |
| 11286 | ABCB7      | 1.07 | 2.43E-02 | 1.22E-01 | 774.24   | not significant |
| 11287 | DGAT1      | 1.07 | 2.43E-02 | 1.22E-01 | 795.92   | not significant |
| 11288 | HIGD2A     | 1.07 | 1.58E-02 | 9.23E-02 | 1927.51  | not significant |
| 11289 | PHGDH      | 1.07 | 1.63E-03 | 1.83E-02 | 10316.66 | not significant |
| 11290 | COMTD1     | 1.07 | 2.42E-02 | 1.22E-01 | 198.45   | not significant |
| 11291 | MLLT11     | 1.07 | 5.41E-03 | 4.28E-02 | 2766.46  | not significant |
| 11292 | SLC3A2     | 1.07 | 7.36E-04 | 1.02E-02 | 10741.66 | not significant |
| 11293 | DDX11      | 1.07 | 6.37E-03 | 4.83E-02 | 2736.31  | not significant |
| 11294 | WIPI2      | 1.07 | 5.40E-03 | 4.28E-02 | 2919.68  | not significant |
| 11295 | C1GALT1    | 1.07 | 7.67E-03 | 5.58E-02 | 2538.34  | not significant |
| 11296 | PHF11      | 1.07 | 1.72E-02 | 9.68E-02 | 1068.83  | not significant |
| 11297 | ZNF248     | 1.07 | 2.38E-02 | 1.21E-01 | 762.17   | not significant |
| 11298 | SGSM2      | 1.07 | 1.13E-02 | 7.22E-02 | 2320.34  | not significant |
| 11299 | TMEM258    | 1.07 | 1.23E-02 | 7.66E-02 | 1552.97  | not significant |
| 11300 | SC5D       | 1.07 | 1.23E-02 | 7.68E-02 | 1764.70  | not significant |
| 11301 | PVRIG      | 1.07 | 8.12E-03 | 5.76E-02 | 2314.08  | not significant |
| 11302 | DCK        | 1.07 | 1.02E-03 | 1.30E-02 | 6116.56  | not significant |
| 11303 | SNX10      | 1.07 | 1.09E-02 | 7.07E-02 | 1512.56  | not significant |
| 11304 | SLC35A5    | 1.07 | 1.17E-02 | 7.41E-02 | 1418.35  | not significant |
| 11305 | BBS2       | 1.07 | 2.75E-02 | 1.32E-01 | 615.38   | not significant |
| 11306 | ADCK4      | 1.07 | 2.92E-02 | 1.38E-01 | 528.63   | not significant |
| 11307 | DSN1       | 1.07 | 4.75E-03 | 3.90E-02 | 2435.99  | not significant |
| 11308 | NLRX1      | 1.07 | 2.40E-02 | 1.21E-01 | 805.23   | not significant |
| 11309 | CTDSP1     | 1.07 | 1.06E-02 | 6.95E-02 | 1847.48  | not significant |
| 11310 | UBQLN2     | 1.07 | 7.82E-03 | 5.64E-02 | 2062.92  | not significant |
| 11311 | CAMSAP1    | 1.07 | 1.09E-02 | 7.07E-02 | 1866.80  | not significant |
| 11312 | ERLEC1     | 1.07 | 8.01E-03 | 5.71E-02 | 1870.24  | not significant |
| 11313 | NBR1       | 1.07 | 7.77E-03 | 5.62E-02 | 2083.24  | not significant |
| 11314 | ABCC1      | 1.07 | 4.42E-03 | 3.71E-02 | 5587.00  | not significant |
| 11315 | PCSK4      | 1.07 | 1.74E-02 | 9.74E-02 | 144.27   | not significant |
| 11316 | VIM        | 1.07 | 5.27E-04 | 7.99E-03 | 34125.19 | not significant |
| 11317 | TINF2      | 1.07 | 5.72E-03 | 4.48E-02 | 2491.79  | not significant |
| 11318 | DHTKD1     | 1.07 | 9.85E-03 | 6.57E-02 | 1464.80  | not significant |
| 11319 | MGST3      | 1.07 | 2.92E-02 | 1.38E-01 | 409.65   | not significant |
| 11320 | SRC        | 1.07 | 2.89E-02 | 1.37E-01 | 331.20   | not significant |
| 11321 | C17orf59   | 1.07 | 2.95E-02 | 1.39E-01 | 378.61   | not significant |
| 11322 | DPM3       | 1.07 | 2.87E-02 | 1.36E-01 | 288.87   | not significant |
| 11323 | SLC26A6    | 1.07 | 2.17E-02 | 1.13E-01 | 794.61   | not significant |
| 11324 | SLC12A4    | 1.07 | 2.38E-02 | 1.21E-01 | 889.51   | not significant |
| 11325 | TMEM106A   | 1.07 | 2.94E-02 | 1.38E-01 | 348.37   | not significant |
| 11326 | FECH       | 1.07 | 1.92E-02 | 1.04E-01 | 918.03   | not significant |
| 11327 | C7orf43    | 1.07 | 9.96E-03 | 6.62E-02 | 1406.21  | not significant |
| 11328 | UBOX5      | 1.07 | 2.58E-02 | 1.27E-01 | 607.98   | not significant |
| 11329 | TAF7       | 1.07 | 1.02E-03 | 1.30E-02 | 6269.89  | not significant |
| 11330 | CTHRC1     | 1.07 | 2.19E-02 | 1.14E-01 | 772.97   | not significant |
| 11331 | FDPS       | 1.07 | 2.63E-03 | 2.58E-02 | 5897.00  | not significant |
| 11332 | CDK10      | 1.07 | 9.19E-03 | 6.26E-02 | 1533.85  | not significant |
| 11333 | PAXIP1-AS1 | 1.07 | 2.87E-02 | 1.36E-01 | 329.82   | not significant |
| 11334 | MINK1      | 1.07 | 1.13E-02 | 7.23E-02 | 1434.11  | not significant |
| 11335 | DMC1       | 1.07 | 2.75E-02 | 1.32E-01 | 493.18   | not significant |
| 11336 | CDK2       | 1.07 | 8.66E-04 | 1.15E-02 | 6127.18  | not significant |
| 11337 | SHMT2      | 1.07 | 6.11E-04 | 8.82E-03 | 12811.95 | not significant |
| 11338 | ZNRF2      | 1.07 | 1.20E-02 | 7.54E-02 | 1162.24  | not significant |
| 11339 | ORAI3      | 1.07 | 1.95E-02 | 1.05E-01 | 161.12   | not significant |

|       |           |      |          |          |          |                 |
|-------|-----------|------|----------|----------|----------|-----------------|
| 11340 | DDB2      | 1.07 | 9.85E-03 | 6.57E-02 | 1460.47  | not significant |
| 11341 | H1FX      | 1.07 | 2.52E-02 | 1.25E-01 | 8695.65  | not significant |
| 11342 | GAB2      | 1.07 | 2.74E-04 | 4.86E-03 | 29656.88 | not significant |
| 11343 | DLG3      | 1.07 | 1.70E-02 | 9.61E-02 | 977.18   | not significant |
| 11344 | P2RX4     | 1.07 | 2.34E-02 | 1.19E-01 | 619.42   | not significant |
| 11345 | CD3E      | 1.07 | 6.14E-05 | 1.46E-03 | 21284.71 | not significant |
| 11346 | CARHSP1   | 1.07 | 3.08E-03 | 2.87E-02 | 5289.55  | not significant |
| 11347 | ST8SIA4   | 1.07 | 4.38E-03 | 3.69E-02 | 2756.17  | not significant |
| 11348 | SLC25A3   | 1.07 | 3.90E-04 | 6.34E-03 | 16727.15 | not significant |
| 11349 | RCBTB1    | 1.07 | 6.17E-03 | 4.73E-02 | 1768.70  | not significant |
| 11350 | CCNL1     | 1.07 | 4.29E-03 | 3.64E-02 | 3750.85  | not significant |
| 11351 | GGCX      | 1.07 | 2.16E-02 | 1.13E-01 | 690.29   | not significant |
| 11352 | CHD1L     | 1.07 | 1.34E-02 | 8.17E-02 | 1133.16  | not significant |
| 11353 | CDCA7     | 1.07 | 1.70E-04 | 3.29E-03 | 8860.99  | not significant |
| 11354 | RPL22L1   | 1.07 | 6.47E-03 | 4.89E-02 | 3464.81  | not significant |
| 11355 | DTL       | 1.07 | 2.50E-04 | 4.54E-03 | 6265.08  | not significant |
| 11356 | CEP97     | 1.07 | 1.61E-02 | 9.29E-02 | 998.68   | not significant |
| 11357 | EPG5      | 1.07 | 1.99E-02 | 1.06E-01 | 1354.25  | not significant |
| 11358 | HERC3     | 1.07 | 2.00E-02 | 1.06E-01 | 735.18   | not significant |
| 11359 | SBK1      | 1.07 | 7.50E-03 | 5.48E-02 | 1497.76  | not significant |
| 11360 | BRK1      | 1.07 | 4.47E-03 | 3.74E-02 | 3683.91  | not significant |
| 11361 | VASH2     | 1.07 | 1.31E-02 | 8.04E-02 | 1033.19  | not significant |
| 11362 | USP51     | 1.07 | 2.61E-02 | 1.28E-01 | 313.45   | not significant |
| 11363 | YAF2      | 1.07 | 1.78E-02 | 9.92E-02 | 812.58   | not significant |
| 11364 | CHST12    | 1.07 | 2.59E-03 | 2.56E-02 | 2693.30  | not significant |
| 11365 | FANCA     | 1.07 | 7.07E-03 | 5.24E-02 | 2310.95  | not significant |
| 11366 | NT5C      | 1.07 | 1.26E-02 | 7.81E-02 | 1089.58  | not significant |
| 11367 | PIN4      | 1.07 | 2.65E-02 | 1.29E-01 | 392.48   | not significant |
| 11368 | ZNF785    | 1.07 | 2.63E-02 | 1.29E-01 | 314.19   | not significant |
| 11369 | LINC01089 | 1.07 | 2.63E-02 | 1.29E-01 | 371.30   | not significant |
| 11370 | TSPYL4    | 1.07 | 3.18E-03 | 2.94E-02 | 2549.46  | not significant |
| 11371 | NCSTN     | 1.07 | 6.79E-03 | 5.08E-02 | 1892.46  | not significant |
| 11372 | CDC7      | 1.07 | 2.40E-03 | 2.44E-02 | 2637.25  | not significant |
| 11373 | PI4K2B    | 1.07 | 3.18E-03 | 2.94E-02 | 2153.23  | not significant |
| 11374 | SLC35B2   | 1.07 | 7.92E-03 | 5.67E-02 | 1626.15  | not significant |
| 11375 | BIN2      | 1.07 | 7.71E-03 | 5.59E-02 | 1607.57  | not significant |
| 11376 | SLC25A1   | 1.07 | 2.48E-02 | 1.24E-01 | 622.15   | not significant |
| 11377 | SPG11     | 1.07 | 1.67E-02 | 9.51E-02 | 1358.79  | not significant |
| 11378 | SPTSSA    | 1.07 | 1.41E-02 | 8.45E-02 | 1074.57  | not significant |
| 11379 | EPM2AIP1  | 1.07 | 1.15E-02 | 7.31E-02 | 1934.35  | not significant |
| 11380 | DHRS3     | 1.07 | 2.57E-02 | 1.27E-01 | 338.54   | not significant |
| 11381 | TMEM38B   | 1.07 | 2.00E-02 | 1.07E-01 | 853.55   | not significant |
| 11382 | NDST2     | 1.07 | 1.58E-02 | 9.20E-02 | 1135.82  | not significant |
| 11383 | KRBA1     | 1.07 | 2.22E-02 | 1.15E-01 | 577.60   | not significant |
| 11384 | IDI1      | 1.07 | 5.29E-04 | 8.01E-03 | 4617.48  | not significant |
| 11385 | RPA3      | 1.07 | 8.66E-03 | 6.02E-02 | 1361.91  | not significant |
| 11386 | SLC4A2    | 1.07 | 7.93E-04 | 1.08E-02 | 4115.05  | not significant |
| 11387 | MOV10     | 1.07 | 2.08E-03 | 2.17E-02 | 3627.86  | not significant |
| 11388 | SMO       | 1.07 | 8.00E-03 | 5.71E-02 | 1426.25  | not significant |
| 11389 | NFATC1    | 1.07 | 1.48E-02 | 8.77E-02 | 947.45   | not significant |
| 11390 | TSPAN4    | 1.07 | 2.38E-02 | 1.21E-01 | 463.03   | not significant |
| 11391 | EBP       | 1.08 | 2.16E-02 | 1.13E-01 | 577.96   | not significant |
| 11392 | Cxorf57   | 1.08 | 2.35E-02 | 1.20E-01 | 485.35   | not significant |
| 11393 | HLA-B     | 1.08 | 1.70E-03 | 1.88E-02 | 5830.97  | not significant |
| 11394 | HEXA      | 1.08 | 7.81E-03 | 5.64E-02 | 1513.44  | not significant |
| 11395 | ANXA3     | 1.08 | 1.66E-02 | 9.51E-02 | 145.36   | not significant |
| 11396 | ZNF367    | 1.08 | 3.23E-03 | 2.97E-02 | 2164.96  | not significant |
| 11397 | LCMT2     | 1.08 | 1.68E-02 | 9.57E-02 | 740.38   | not significant |
| 11398 | LMBRD1    | 1.08 | 1.56E-02 | 9.14E-02 | 913.63   | not significant |
| 11399 | POU2AF1   | 1.08 | 2.43E-02 | 1.22E-01 | 397.08   | not significant |
| 11400 | KRBOX4    | 1.08 | 2.40E-02 | 1.21E-01 | 458.17   | not significant |
| 11401 | DVL2      | 1.08 | 1.03E-03 | 1.30E-02 | 3176.67  | not significant |
| 11402 | GUSB      | 1.08 | 3.41E-03 | 3.07E-02 | 2598.56  | not significant |
| 11403 | ERMAP     | 1.08 | 1.85E-02 | 1.02E-01 | 163.33   | not significant |
| 11404 | PARP10    | 1.08 | 2.07E-02 | 1.10E-01 | 564.96   | not significant |
| 11405 | ZFP90     | 1.08 | 1.55E-02 | 9.09E-02 | 1081.62  | not significant |
| 11406 | C19orf54  | 1.08 | 1.64E-02 | 9.40E-02 | 799.98   | not significant |
| 11407 | ILF3-AS1  | 1.08 | 2.43E-02 | 1.22E-01 | 391.04   | not significant |
| 11408 | TPT1      | 1.08 | 1.67E-03 | 1.86E-02 | 56512.94 | not significant |
| 11409 | KDELRL1   | 1.08 | 1.08E-03 | 1.34E-02 | 3188.98  | not significant |
| 11410 | POLR1D    | 1.08 | 2.57E-03 | 2.54E-02 | 3858.51  | not significant |
| 11411 | CD53      | 1.08 | 2.95E-04 | 5.16E-03 | 4636.42  | not significant |
| 11412 | FAM213A   | 1.08 | 1.07E-02 | 6.98E-02 | 1214.07  | not significant |
| 11413 | CLN3      | 1.08 | 6.71E-03 | 5.04E-02 | 1386.94  | not significant |
| 11414 | IL4R      | 1.08 | 2.20E-03 | 2.27E-02 | 2264.09  | not significant |
| 11415 | CD1E      | 1.08 | 3.82E-05 | 9.87E-04 | 11451.30 | not significant |
| 11416 | OPTN      | 1.08 | 7.55E-03 | 5.50E-02 | 1545.92  | not significant |
| 11417 | SH2D3C    | 1.08 | 9.70E-03 | 6.52E-02 | 1225.51  | not significant |
| 11418 | NECAB3    | 1.08 | 1.69E-02 | 9.58E-02 | 742.84   | not significant |
| 11419 | ZNF316    | 1.08 | 3.05E-03 | 2.86E-02 | 2036.18  | not significant |
| 11420 | ACAD8     | 1.08 | 1.23E-02 | 7.67E-02 | 910.41   | not significant |
| 11421 | C4orf3    | 1.08 | 6.86E-03 | 5.12E-02 | 1584.66  | not significant |
| 11422 | SLC1A4    | 1.08 | 1.12E-04 | 2.37E-03 | 9967.86  | not significant |
| 11423 | FN3KRP    | 1.08 | 2.38E-03 | 2.43E-02 | 2424.98  | not significant |
| 11424 | TMEM160   | 1.08 | 1.60E-02 | 9.27E-02 | 976.79   | not significant |
| 11425 | XRN1      | 1.08 | 5.11E-03 | 4.11E-02 | 2046.36  | not significant |
| 11426 | ZNF362    | 1.08 | 7.57E-03 | 5.51E-02 | 1380.53  | not significant |
| 11427 | EEF1B2    | 1.08 | 1.66E-03 | 1.85E-02 | 9221.93  | not significant |

|       |            |      |          |          |          |                 |
|-------|------------|------|----------|----------|----------|-----------------|
| 11428 | SUGP2      | 1.08 | 4.82E-03 | 3.95E-02 | 4400.48  | not significant |
| 11429 | HY1        | 1.08 | 2.35E-02 | 1.20E-01 | 312.96   | not significant |
| 11430 | MZB1       | 1.08 | 1.14E-03 | 1.39E-02 | 4341.18  | not significant |
| 11431 | ZNF266     | 1.08 | 2.70E-03 | 2.62E-02 | 2400.19  | not significant |
| 11432 | PARP8      | 1.08 | 4.50E-03 | 3.75E-02 | 1603.47  | not significant |
| 11433 | SELL       | 1.08 | 9.65E-05 | 2.10E-03 | 7260.83  | not significant |
| 11434 | CNOT8      | 1.08 | 5.81E-04 | 8.52E-03 | 3726.28  | not significant |
| 11435 | ABRACL     | 1.08 | 1.07E-03 | 1.34E-02 | 5776.27  | not significant |
| 11436 | LBH        | 1.08 | 6.34E-03 | 4.83E-02 | 1347.75  | not significant |
| 11437 | INPPL1     | 1.08 | 9.84E-04 | 1.26E-02 | 3789.44  | not significant |
| 11438 | CCDC9      | 1.08 | 1.63E-02 | 9.37E-02 | 685.36   | not significant |
| 11439 | MED28      | 1.08 | 2.88E-03 | 2.74E-02 | 2487.09  | not significant |
| 11440 | DGKA       | 1.08 | 4.06E-04 | 6.49E-03 | 5981.59  | not significant |
| 11441 | SHISA2     | 1.08 | 3.86E-04 | 6.30E-03 | 5193.06  | not significant |
| 11442 | NCAPH2     | 1.08 | 6.87E-04 | 9.61E-03 | 5052.47  | not significant |
| 11443 | PTK2B      | 1.08 | 1.40E-04 | 2.83E-03 | 5409.48  | not significant |
| 11444 | DPP7       | 1.08 | 1.40E-03 | 1.63E-02 | 2511.00  | not significant |
| 11445 | MIER2      | 1.08 | 1.13E-02 | 7.22E-02 | 878.16   | not significant |
| 11446 | HACE1      | 1.08 | 2.78E-03 | 2.67E-02 | 1923.75  | not significant |
| 11447 | DNASE2     | 1.08 | 8.27E-03 | 5.84E-02 | 1089.18  | not significant |
| 11448 | METTL9     | 1.08 | 7.58E-04 | 1.04E-02 | 4125.66  | not significant |
| 11449 | SAMSN1     | 1.08 | 7.32E-03 | 5.37E-02 | 1552.22  | not significant |
| 11450 | PCNA       | 1.08 | 3.87E-04 | 6.31E-03 | 24237.10 | not significant |
| 11451 | JMY        | 1.08 | 1.76E-02 | 9.86E-02 | 644.39   | not significant |
| 11452 | CCNE2      | 1.08 | 1.64E-03 | 1.84E-02 | 3413.05  | not significant |
| 11453 | KLHDC2     | 1.08 | 1.26E-02 | 7.81E-02 | 874.31   | not significant |
| 11454 | NEURL4     | 1.08 | 3.55E-03 | 3.17E-02 | 1989.97  | not significant |
| 11455 | RBFA       | 1.08 | 9.77E-03 | 6.54E-02 | 1006.75  | not significant |
| 11456 | JRK        | 1.08 | 2.23E-02 | 1.16E-01 | 336.30   | not significant |
| 11457 | TSPAN3     | 1.08 | 1.52E-03 | 1.73E-02 | 3485.39  | not significant |
| 11458 | HSDL1      | 1.08 | 9.42E-04 | 1.22E-02 | 2819.92  | not significant |
| 11459 | GRN        | 1.08 | 1.71E-02 | 9.63E-02 | 607.95   | not significant |
| 11460 | SLC39A13   | 1.08 | 1.77E-02 | 9.86E-02 | 556.06   | not significant |
| 11461 | LRRC34     | 1.08 | 1.79E-02 | 9.94E-02 | 168.37   | not significant |
| 11462 | MTHFD2     | 1.08 | 9.27E-05 | 2.04E-03 | 9663.10  | not significant |
| 11463 | CLASRP     | 1.08 | 3.28E-03 | 3.00E-02 | 1842.65  | not significant |
| 11464 | PCMTD2     | 1.08 | 6.33E-03 | 4.82E-02 | 1230.84  | not significant |
| 11465 | P4HB       | 1.08 | 1.78E-05 | 5.52E-04 | 32773.52 | not significant |
| 11466 | CECR1      | 1.08 | 4.26E-03 | 3.62E-02 | 1920.12  | not significant |
| 11467 | DNAJB9     | 1.08 | 1.63E-02 | 9.37E-02 | 637.19   | not significant |
| 11468 | BTG1       | 1.08 | 2.52E-04 | 4.56E-03 | 5146.89  | not significant |
| 11469 | GNPTG      | 1.08 | 2.03E-02 | 1.08E-01 | 504.10   | not significant |
| 11470 | DERL1      | 1.08 | 6.62E-04 | 9.35E-03 | 4256.58  | not significant |
| 11471 | SLC25A14   | 1.08 | 1.91E-02 | 1.04E-01 | 535.65   | not significant |
| 11472 | FANCI      | 1.08 | 4.63E-04 | 7.22E-03 | 5150.55  | not significant |
| 11473 | SLFN5      | 1.08 | 8.43E-03 | 5.93E-02 | 1205.96  | not significant |
| 11474 | DOCK11     | 1.08 | 4.03E-03 | 3.46E-02 | 1901.71  | not significant |
| 11475 | SLC4A7     | 1.08 | 3.29E-03 | 3.00E-02 | 4157.22  | not significant |
| 11476 | SHMT1      | 1.08 | 4.01E-03 | 3.45E-02 | 1702.46  | not significant |
| 11477 | GIMAP4     | 1.08 | 1.63E-04 | 3.19E-03 | 6504.95  | not significant |
| 11478 | TRIM5      | 1.08 | 4.53E-03 | 3.77E-02 | 1486.68  | not significant |
| 11479 | NSMCE4A    | 1.08 | 5.52E-03 | 4.36E-02 | 1485.25  | not significant |
| 11480 | HLA-A      | 1.08 | 3.23E-03 | 2.97E-02 | 2805.15  | not significant |
| 11481 | ENTHD2     | 1.08 | 1.14E-02 | 7.25E-02 | 994.56   | not significant |
| 11482 | POLD1      | 1.08 | 6.02E-04 | 8.71E-03 | 5349.81  | not significant |
| 11483 | KNTC1      | 1.08 | 1.68E-03 | 1.87E-02 | 6524.08  | not significant |
| 11484 | MAPK8IP3   | 1.08 | 2.93E-03 | 2.77E-02 | 1958.76  | not significant |
| 11485 | SCARB2     | 1.08 | 1.89E-02 | 1.03E-01 | 487.91   | not significant |
| 11486 | NDUFB11    | 1.08 | 1.38E-02 | 8.31E-02 | 747.95   | not significant |
| 11487 | KLHL22     | 1.08 | 1.95E-02 | 1.05E-01 | 419.39   | not significant |
| 11488 | IGSF8      | 1.08 | 3.25E-03 | 2.98E-02 | 1895.07  | not significant |
| 11489 | FBXO46     | 1.08 | 1.05E-02 | 6.88E-02 | 826.37   | not significant |
| 11490 | CHI3L2     | 1.08 | 2.30E-05 | 6.75E-04 | 27010.18 | not significant |
| 11491 | PIDD1      | 1.08 | 2.50E-03 | 2.50E-02 | 1904.81  | not significant |
| 11492 | C10orf32   | 1.08 | 1.14E-02 | 7.25E-02 | 758.17   | not significant |
| 11493 | GTPBP2     | 1.08 | 2.30E-03 | 2.37E-02 | 1831.23  | not significant |
| 11494 | ATM        | 1.08 | 4.78E-03 | 3.91E-02 | 2918.47  | not significant |
| 11495 | MFSD3      | 1.08 | 2.08E-02 | 1.10E-01 | 361.79   | not significant |
| 11496 | NEU1       | 1.08 | 1.88E-02 | 1.03E-01 | 194.02   | not significant |
| 11497 | SLC25A40   | 1.08 | 1.40E-03 | 1.63E-02 | 2448.84  | not significant |
| 11498 | BNIP3L     | 1.08 | 2.35E-03 | 2.41E-02 | 1813.13  | not significant |
| 11499 | CALHM2     | 1.08 | 1.10E-02 | 7.11E-02 | 829.97   | not significant |
| 11500 | CD46       | 1.08 | 9.17E-04 | 1.20E-02 | 4588.56  | not significant |
| 11501 | PRKCSH     | 1.08 | 7.47E-05 | 1.71E-03 | 8171.00  | not significant |
| 11502 | LRRC37B    | 1.08 | 1.66E-02 | 9.48E-02 | 523.57   | not significant |
| 11503 | PPM1M      | 1.08 | 1.30E-02 | 7.99E-02 | 679.78   | not significant |
| 11504 | ALAS1      | 1.08 | 1.49E-03 | 1.71E-02 | 2103.54  | not significant |
| 11505 | XBP1       | 1.08 | 2.78E-04 | 4.93E-03 | 3836.72  | not significant |
| 11506 | TBC1D15    | 1.08 | 2.42E-03 | 2.46E-02 | 1749.60  | not significant |
| 11507 | YIPF4      | 1.08 | 1.13E-02 | 7.22E-02 | 930.16   | not significant |
| 11508 | RSAD2      | 1.08 | 3.38E-03 | 3.05E-02 | 1736.39  | not significant |
| 11509 | SLC1A5     | 1.08 | 2.75E-05 | 7.63E-04 | 10336.43 | not significant |
| 11510 | ARRDC1-AS1 | 1.08 | 1.95E-02 | 1.05E-01 | 349.34   | not significant |
| 11511 | ORC1       | 1.08 | 4.58E-04 | 7.16E-03 | 3074.30  | not significant |
| 11512 | ACBD4      | 1.08 | 1.73E-02 | 9.70E-02 | 184.14   | not significant |
| 11513 | NUCB1      | 1.08 | 1.03E-04 | 2.24E-03 | 4868.38  | not significant |
| 11514 | SLC35C2    | 1.08 | 3.33E-03 | 3.02E-02 | 1694.47  | not significant |
| 11515 | VWCE       | 1.08 | 2.00E-02 | 1.06E-01 | 306.91   | not significant |

|       |            |      |          |          |          |                 |
|-------|------------|------|----------|----------|----------|-----------------|
| 11516 | IGBP1      | 1.09 | 6.85E-03 | 5.12E-02 | 1129.44  | not significant |
| 11517 | SYT1       | 1.09 | 1.34E-02 | 8.17E-02 | 662.06   | not significant |
| 11518 | FAM160A2   | 1.09 | 1.46E-02 | 8.66E-02 | 542.93   | not significant |
| 11519 | C14orf159  | 1.09 | 4.71E-03 | 3.88E-02 | 1551.18  | not significant |
| 11520 | DNPH1      | 1.09 | 1.87E-02 | 1.02E-01 | 381.15   | not significant |
| 11521 | SNHG6      | 1.09 | 1.66E-02 | 9.51E-02 | 2168.55  | not significant |
| 11522 | PHF19      | 1.09 | 1.07E-04 | 2.28E-03 | 4287.98  | not significant |
| 11523 | SPPL2A     | 1.09 | 6.00E-03 | 4.64E-02 | 991.73   | not significant |
| 11524 | CIRBP      | 1.09 | 7.38E-05 | 1.70E-03 | 5468.69  | not significant |
| 11525 | TMEM147    | 1.09 | 3.38E-03 | 3.05E-02 | 2212.92  | not significant |
| 11526 | MIR155HG   | 1.09 | 1.84E-02 | 1.01E-01 | 236.26   | not significant |
| 11527 | S1PR4      | 1.09 | 3.48E-03 | 3.11E-02 | 1533.59  | not significant |
| 11528 | TAPT1      | 1.09 | 4.62E-03 | 3.83E-02 | 1353.71  | not significant |
| 11529 | LYSMD4     | 1.09 | 1.92E-02 | 1.04E-01 | 345.87   | not significant |
| 11530 | FIGNL1     | 1.09 | 1.33E-03 | 1.57E-02 | 2915.06  | not significant |
| 11531 | GMP1       | 1.09 | 9.78E-03 | 6.54E-02 | 709.00   | not significant |
| 11532 | KIAA0141   | 1.09 | 1.64E-03 | 1.83E-02 | 2077.43  | not significant |
| 11533 | PTPLAD2    | 1.09 | 6.37E-03 | 4.83E-02 | 1016.15  | not significant |
| 11534 | TMEM259    | 1.09 | 3.37E-05 | 8.88E-04 | 6374.31  | not significant |
| 11535 | LZTR1      | 1.09 | 1.98E-03 | 2.09E-02 | 1911.19  | not significant |
| 11536 | PFKL       | 1.09 | 1.16E-03 | 1.41E-02 | 2023.63  | not significant |
| 11537 | SETDB1     | 1.09 | 1.76E-03 | 1.93E-02 | 1706.58  | not significant |
| 11538 | CD96       | 1.09 | 8.07E-04 | 1.09E-02 | 5277.32  | not significant |
| 11539 | CFTR       | 1.09 | 1.07E-04 | 2.29E-03 | 4207.53  | not significant |
| 11540 | F2R        | 1.09 | 3.74E-03 | 3.28E-02 | 1309.21  | not significant |
| 11541 | ATG13      | 1.09 | 9.80E-04 | 1.26E-02 | 2019.91  | not significant |
| 11542 | CSGALNACT2 | 1.09 | 1.90E-03 | 2.04E-02 | 1806.17  | not significant |
| 11543 | CYBA       | 1.09 | 2.72E-03 | 2.63E-02 | 2181.20  | not significant |
| 11544 | PMM1       | 1.09 | 1.25E-02 | 7.79E-02 | 622.63   | not significant |
| 11545 | EHD2       | 1.09 | 4.93E-03 | 4.01E-02 | 1020.64  | not significant |
| 11546 | RPUSD3     | 1.09 | 6.26E-03 | 4.79E-02 | 874.99   | not significant |
| 11547 | APPL2      | 1.09 | 7.07E-03 | 5.24E-02 | 831.39   | not significant |
| 11548 | TLL1       | 1.09 | 1.81E-02 | 1.00E-01 | 244.70   | not significant |
| 11549 | ANKRD36    | 1.09 | 1.83E-02 | 1.01E-01 | 259.61   | not significant |
| 11550 | ZDHHC17    | 1.09 | 2.20E-03 | 2.28E-02 | 1689.66  | not significant |
| 11551 | PTPRCAP    | 1.09 | 1.67E-04 | 3.25E-03 | 5777.93  | not significant |
| 11552 | GTF3C5     | 1.09 | 1.29E-04 | 2.64E-03 | 5243.16  | not significant |
| 11553 | ARHGAP9    | 1.09 | 1.78E-03 | 1.94E-02 | 1729.10  | not significant |
| 11554 | GABARAPL2  | 1.09 | 3.04E-03 | 2.85E-02 | 1638.43  | not significant |
| 11555 | H6PD       | 1.09 | 4.51E-03 | 3.76E-02 | 1713.57  | not significant |
| 11556 | FBXO8      | 1.09 | 1.59E-02 | 9.26E-02 | 379.86   | not significant |
| 11557 | SIPA1      | 1.09 | 1.36E-02 | 8.26E-02 | 476.69   | not significant |
| 11558 | SPTBN2     | 1.09 | 1.20E-03 | 1.45E-02 | 1759.98  | not significant |
| 11559 | KCNK1      | 1.09 | 1.78E-03 | 1.94E-02 | 1648.15  | not significant |
| 11560 | PELI1      | 1.09 | 1.50E-02 | 8.89E-02 | 440.89   | not significant |
| 11561 | GBP4       | 1.09 | 5.15E-04 | 7.84E-03 | 2494.12  | not significant |
| 11562 | FANCG      | 1.09 | 4.06E-04 | 6.49E-03 | 2734.91  | not significant |
| 11563 | FCGRT      | 1.09 | 1.03E-02 | 6.83E-02 | 676.41   | not significant |
| 11564 | GAS5       | 1.09 | 6.14E-04 | 8.82E-03 | 3241.28  | not significant |
| 11565 | TAF1C      | 1.09 | 6.14E-04 | 8.82E-03 | 2701.30  | not significant |
| 11566 | SDE2       | 1.09 | 9.71E-04 | 1.25E-02 | 1945.30  | not significant |
| 11567 | YIPF3      | 1.09 | 1.41E-03 | 1.64E-02 | 1720.77  | not significant |
| 11568 | THUMP3-AS1 | 1.09 | 1.71E-02 | 9.63E-02 | 372.93   | not significant |
| 11569 | CASP10     | 1.09 | 6.33E-04 | 9.04E-03 | 2052.41  | not significant |
| 11570 | C17orf62   | 1.09 | 3.01E-05 | 8.15E-04 | 5227.02  | not significant |
| 11571 | LPCAT4     | 1.09 | 3.43E-03 | 3.09E-02 | 1158.41  | not significant |
| 11572 | JAK3       | 1.09 | 3.70E-03 | 3.26E-02 | 1295.75  | not significant |
| 11573 | TMED1      | 1.09 | 1.70E-02 | 9.62E-02 | 330.83   | not significant |
| 11574 | WSB1       | 1.09 | 9.84E-04 | 1.26E-02 | 3201.55  | not significant |
| 11575 | RABAC1     | 1.09 | 1.67E-02 | 9.52E-02 | 337.53   | not significant |
| 11576 | ARFGAP3    | 1.09 | 3.30E-04 | 5.54E-03 | 3350.01  | not significant |
| 11577 | TMEM60     | 1.09 | 1.18E-02 | 7.44E-02 | 532.63   | not significant |
| 11578 | PSMC3IP    | 1.09 | 5.27E-03 | 4.21E-02 | 1062.39  | not significant |
| 11579 | CLK2       | 1.09 | 6.42E-03 | 4.86E-02 | 816.98   | not significant |
| 11580 | SS18L1     | 1.09 | 4.43E-03 | 3.72E-02 | 1132.10  | not significant |
| 11581 | TMEM102    | 1.09 | 1.59E-02 | 9.23E-02 | 334.04   | not significant |
| 11582 | ZADH2      | 1.09 | 8.83E-03 | 6.09E-02 | 840.78   | not significant |
| 11583 | ZC4H2      | 1.09 | 4.66E-03 | 3.85E-02 | 952.75   | not significant |
| 11584 | CCR4       | 1.09 | 1.55E-02 | 9.09E-02 | 353.47   | not significant |
| 11585 | TNFAIP8    | 1.09 | 1.59E-04 | 3.14E-03 | 3051.35  | not significant |
| 11586 | RHOC       | 1.09 | 4.71E-03 | 3.88E-02 | 1385.55  | not significant |
| 11587 | TCEAL8     | 1.09 | 2.88E-03 | 2.74E-02 | 1455.72  | not significant |
| 11588 | TMEM41B    | 1.09 | 1.93E-03 | 2.07E-02 | 1547.37  | not significant |
| 11589 | FADS2      | 1.09 | 3.34E-06 | 1.36E-04 | 12825.28 | not significant |
| 11590 | RECQL5     | 1.09 | 2.55E-03 | 2.53E-02 | 1207.07  | not significant |
| 11591 | SAT1       | 1.09 | 4.95E-03 | 4.02E-02 | 938.17   | not significant |
| 11592 | SEMA4A     | 1.09 | 8.49E-03 | 5.94E-02 | 631.07   | not significant |
| 11593 | FAM134A    | 1.09 | 1.59E-04 | 3.14E-03 | 2811.48  | not significant |
| 11594 | CCNDBP1    | 1.09 | 7.04E-03 | 5.23E-02 | 813.43   | not significant |
| 11595 | KLHL17     | 1.09 | 8.50E-03 | 5.94E-02 | 619.11   | not significant |
| 11596 | SGPP1      | 1.09 | 2.19E-03 | 2.27E-02 | 1331.71  | not significant |
| 11597 | TRPT1      | 1.09 | 1.30E-02 | 7.98E-02 | 495.69   | not significant |
| 11598 | SERINC1    | 1.09 | 5.14E-04 | 7.84E-03 | 2599.98  | not significant |
| 11599 | EML2       | 1.09 | 9.33E-03 | 6.32E-02 | 561.20   | not significant |
| 11600 | ETHE1      | 1.09 | 1.52E-02 | 8.95E-02 | 387.82   | not significant |
| 11601 | TRAF5      | 1.09 | 1.47E-03 | 1.69E-02 | 1597.10  | not significant |
| 11602 | CTC1       | 1.09 | 8.34E-01 | NA       | 49.80    | not significant |
| 11603 | HSF2       | 1.09 | 1.22E-03 | 1.46E-02 | 1486.71  | not significant |

|       |              |      |          |          |          |                 |
|-------|--------------|------|----------|----------|----------|-----------------|
| 11604 | NAGPA        | 1.09 | 9.92E-03 | 6.60E-02 | 537.83   | not significant |
| 11605 | TEX264       | 1.09 | 1.82E-03 | 1.96E-02 | 1327.81  | not significant |
| 11606 | SCN7A        | 1.10 | 1.32E-03 | 1.56E-02 | 2227.16  | not significant |
| 11607 | PCBD2        | 1.10 | 1.44E-02 | 8.62E-02 | 375.76   | not significant |
| 11608 | NARFL        | 1.10 | 4.65E-03 | 3.85E-02 | 883.27   | not significant |
| 11609 | RRNAD1       | 1.10 | 1.12E-02 | 7.19E-02 | 475.13   | not significant |
| 11610 | TECPR1       | 1.10 | 2.07E-03 | 2.17E-02 | 1330.01  | not significant |
| 11611 | FAM111A      | 1.10 | 3.85E-04 | 6.30E-03 | 4204.96  | not significant |
| 11612 | AACS         | 1.10 | 2.01E-03 | 2.12E-02 | 1219.49  | not significant |
| 11613 | SLC37A1      | 1.10 | 8.25E-03 | 5.83E-02 | 578.53   | not significant |
| 11614 | SSR2         | 1.10 | 1.77E-05 | 5.52E-04 | 5870.43  | not significant |
| 11615 | HDAC6        | 1.10 | 1.33E-02 | 8.12E-02 | 500.58   | not significant |
| 11616 | CLGN         | 1.10 | 2.55E-03 | 2.53E-02 | 1156.76  | not significant |
| 11617 | ZNF224       | 1.10 | 9.65E-03 | 6.50E-02 | 525.17   | not significant |
| 11618 | RAD51AP1     | 1.10 | 3.38E-01 | NA       | 26.29    | not significant |
| 11619 | KDEL2        | 1.10 | 2.17E-04 | 4.04E-03 | 3066.94  | not significant |
| 11620 | CLIC4        | 1.10 | 3.10E-04 | 5.33E-03 | 2119.03  | not significant |
| 11621 | PAIP2        | 1.10 | 3.25E-05 | 8.67E-04 | 4555.22  | not significant |
| 11622 | ACSS1        | 1.10 | 1.98E-05 | 6.05E-04 | 4381.13  | not significant |
| 11623 | HEXDC        | 1.10 | 5.51E-03 | 4.36E-02 | 777.20   | not significant |
| 11624 | TJP2         | 1.10 | 1.14E-02 | 7.27E-02 | 475.25   | not significant |
| 11625 | FBXO4        | 1.10 | 1.56E-02 | 9.11E-02 | 268.99   | not significant |
| 11626 | CPNE1        | 1.10 | 2.66E-05 | 7.46E-04 | 4924.19  | not significant |
| 11627 | ATF6B        | 1.10 | 2.96E-03 | 2.79E-02 | 1106.67  | not significant |
| 11628 | NAPB         | 1.10 | 1.13E-02 | 7.22E-02 | 487.58   | not significant |
| 11629 | TP53INP1     | 1.10 | 6.67E-03 | 5.03E-02 | 937.29   | not significant |
| 11630 | KCNH2        | 1.10 | 1.05E-02 | 6.88E-02 | 587.79   | not significant |
| 11631 | CD2          | 1.10 | 1.60E-05 | 5.09E-04 | 4980.30  | not significant |
| 11632 | CNN3         | 1.10 | 6.12E-04 | 8.82E-03 | 1963.86  | not significant |
| 11633 | SERINC3      | 1.10 | 2.65E-04 | 4.73E-03 | 3593.86  | not significant |
| 11634 | BRWD1        | 1.10 | 1.51E-03 | 1.72E-02 | 1492.92  | not significant |
| 11635 | TUBGCP6      | 1.10 | 1.25E-03 | 1.49E-02 | 2616.53  | not significant |
| 11636 | ITGB2-AS1    | 1.10 | 1.28E-02 | 7.89E-02 | 151.02   | not significant |
| 11637 | LGALS9       | 1.10 | 8.59E-04 | 1.14E-02 | 1609.03  | not significant |
| 11638 | C6orf48      | 1.10 | 5.19E-03 | 4.16E-02 | 759.28   | not significant |
| 11639 | ELOVL5       | 1.10 | 6.26E-07 | 3.28E-05 | 18225.18 | not significant |
| 11640 | SEPW1        | 1.10 | 5.37E-04 | 8.09E-03 | 2359.85  | not significant |
| 11641 | THAP9-AS1    | 1.10 | 3.02E-03 | 2.84E-02 | 933.75   | not significant |
| 11642 | AMFR         | 1.10 | 9.18E-05 | 2.03E-03 | 2674.87  | not significant |
| 11643 | PRIM1        | 1.10 | 6.13E-04 | 8.82E-03 | 1557.22  | not significant |
| 11644 | U2AF1L4      | 1.10 | 1.44E-02 | 8.62E-02 | 284.55   | not significant |
| 11645 | LINC00493    | 1.10 | 5.97E-03 | 4.63E-02 | 889.45   | not significant |
| 11646 | CD1C         | 1.10 | 2.48E-03 | 2.48E-02 | 1166.20  | not significant |
| 11647 | ZBTB17       | 1.10 | 2.10E-03 | 2.18E-02 | 1169.61  | not significant |
| 11648 | RECCQL4      | 1.10 | 2.94E-05 | 8.03E-04 | 3782.12  | not significant |
| 11649 | CUL7         | 1.10 | 2.55E-03 | 2.53E-02 | 1087.79  | not significant |
| 11650 | FAM160B1     | 1.10 | 3.22E-04 | 5.45E-03 | 2086.08  | not significant |
| 11651 | SEPT7P2      | 1.10 | 1.27E-02 | 7.84E-02 | 352.43   | not significant |
| 11652 | SUV420H2     | 1.10 | 4.47E-03 | 3.74E-02 | 749.50   | not significant |
| 11653 | LRRC45       | 1.10 | 1.83E-04 | 3.50E-03 | 2161.35  | not significant |
| 11654 | EIF3E        | 1.10 | 3.17E-06 | 1.31E-04 | 9046.07  | not significant |
| 11655 | DGKD         | 1.10 | 4.15E-04 | 6.58E-03 | 2231.75  | not significant |
| 11656 | GPRASP1      | 1.10 | 5.14E-03 | 4.13E-02 | 762.73   | not significant |
| 11657 | ZNF579       | 1.10 | 1.15E-02 | 7.29E-02 | 364.50   | not significant |
| 11658 | SARAF        | 1.10 | 7.62E-07 | 3.85E-05 | 7086.76  | not significant |
| 11659 | DHPS         | 1.10 | 9.02E-04 | 1.18E-02 | 2039.51  | not significant |
| 11660 | GIGYF1       | 1.10 | 3.82E-04 | 6.27E-03 | 4021.92  | not significant |
| 11661 | NAT14        | 1.10 | 8.18E-03 | 5.80E-02 | 510.65   | not significant |
| 11662 | MXD3         | 1.10 | 5.30E-03 | 4.22E-02 | 686.38   | not significant |
| 11663 | GPAA1        | 1.10 | 4.36E-03 | 3.68E-02 | 845.04   | not significant |
| 11664 | MUT          | 1.10 | 3.08E-03 | 2.87E-02 | 915.82   | not significant |
| 11665 | CTSD         | 1.10 | 2.98E-06 | 1.23E-04 | 6685.35  | not significant |
| 11666 | BRD3         | 1.10 | 2.47E-04 | 4.49E-03 | 2029.66  | not significant |
| 11667 | GLT8D1       | 1.10 | 3.71E-03 | 3.26E-02 | 992.08   | not significant |
| 11668 | ITM2B        | 1.10 | 2.00E-07 | 1.22E-05 | 12561.04 | not significant |
| 11669 | PNPLA8       | 1.10 | 1.94E-03 | 2.07E-02 | 1078.52  | not significant |
| 11670 | RBL2         | 1.10 | 1.45E-05 | 4.70E-04 | 4935.36  | not significant |
| 11671 | TRANK1       | 1.10 | 1.58E-03 | 1.79E-02 | 1281.91  | not significant |
| 11672 | RTN4         | 1.10 | 5.16E-07 | 2.79E-05 | 8416.47  | not significant |
| 11673 | RNASEH2C     | 1.10 | 7.56E-04 | 1.04E-02 | 1539.27  | not significant |
| 11674 | PMPCB        | 1.10 | 5.32E-05 | 1.30E-03 | 2945.27  | not significant |
| 11675 | MUS81        | 1.10 | 8.72E-04 | 1.15E-02 | 1412.41  | not significant |
| 11676 | ABHD12       | 1.10 | 2.61E-04 | 4.68E-03 | 1833.16  | not significant |
| 11677 | LOC220729    | 1.10 | 9.11E-03 | 6.21E-02 | 445.75   | not significant |
| 11678 | CD38         | 1.10 | 4.85E-04 | 7.48E-03 | 1971.74  | not significant |
| 11679 | IFFO1        | 1.10 | 6.89E-03 | 5.14E-02 | 529.76   | not significant |
| 11680 | 43530_6595   | 1.10 | 6.82E-05 | 1.60E-03 | 4976.41  | not significant |
| 11681 | EPB41L4A-AS1 | 1.10 | 8.06E-03 | 5.73E-02 | 501.68   | not significant |
| 11682 | MBOAT1       | 1.11 | 4.60E-03 | 3.82E-02 | 677.85   | not significant |
| 11683 | B3GAT3       | 1.11 | 2.43E-03 | 2.46E-02 | 1006.42  | not significant |
| 11684 | ASAP2        | 1.11 | 1.35E-02 | 8.19E-02 | 183.20   | not significant |
| 11685 | CCNB1IP1     | 1.11 | 7.84E-04 | 1.07E-02 | 2014.46  | not significant |
| 11686 | C6orf147     | 1.11 | 1.14E-02 | 7.25E-02 | 124.87   | not significant |
| 11687 | ZSWIIM8      | 1.11 | 2.43E-04 | 4.44E-03 | 2229.54  | not significant |
| 11688 | ZDHHC24      | 1.11 | 5.90E-03 | 4.59E-02 | 599.82   | not significant |
| 11689 | GFI1         | 1.11 | 1.79E-03 | 1.95E-02 | 1131.78  | not significant |
| 11690 | FXYD5        | 1.11 | 3.66E-05 | 9.54E-04 | 2806.75  | not significant |
| 11691 | USP44        | 1.11 | 2.09E-03 | 2.18E-02 | 1026.54  | not significant |



|       |              |      |          |          |         |                 |
|-------|--------------|------|----------|----------|---------|-----------------|
| 11692 | CASC15       | 1.11 | 4.55E-03 | 3.78E-02 | 853.06  | not significant |
| 11693 | EZH1         | 1.11 | 2.25E-03 | 2.32E-02 | 922.37  | not significant |
| 11694 | IKZF2        | 1.11 | 5.05E-05 | 1.25E-03 | 9011.33 | not significant |
| 11695 | ALKBH7       | 1.11 | 5.34E-03 | 4.24E-02 | 728.09  | not significant |
| 11696 | CCNG1        | 1.11 | 3.03E-05 | 8.20E-04 | 3241.35 | not significant |
| 11697 | C14orf1      | 1.11 | 6.38E-04 | 9.09E-03 | 1520.37 | not significant |
| 11698 | OGT          | 1.11 | 2.25E-05 | 6.67E-04 | 8231.64 | not significant |
| 11699 | FANCL        | 1.11 | 1.65E-03 | 1.85E-02 | 977.27  | not significant |
| 11700 | HAUS4        | 1.11 | 1.41E-03 | 1.63E-02 | 1053.58 | not significant |
| 11701 | HMGCR        | 1.11 | 3.24E-07 | 1.89E-05 | 7921.69 | not significant |
| 11702 | C17orf70     | 1.11 | 5.76E-05 | 1.39E-03 | 2426.36 | not significant |
| 11703 | RNASET2      | 1.11 | 3.58E-03 | 3.19E-02 | 669.34  | not significant |
| 11704 | ARHGAP4      | 1.11 | 6.35E-05 | 1.50E-03 | 2369.35 | not significant |
| 11705 | HSPA13       | 1.11 | 3.36E-05 | 8.87E-04 | 3596.10 | not significant |
| 11706 | TRIM22       | 1.11 | 1.59E-04 | 3.14E-03 | 2051.97 | not significant |
| 11707 | TNFRSF14     | 1.11 | 9.29E-04 | 1.21E-02 | 1159.01 | not significant |
| 11708 | TMEM194B     | 1.11 | 1.97E-03 | 2.09E-02 | 940.73  | not significant |
| 11709 | SLC25A29     | 1.11 | 1.61E-04 | 3.16E-03 | 1958.22 | not significant |
| 11710 | C22orf39     | 1.11 | 8.19E-04 | 1.10E-02 | 1286.35 | not significant |
| 11711 | CRNDE        | 1.11 | 8.48E-04 | 1.13E-02 | 1227.92 | not significant |
| 11712 | GRAMD1A      | 1.11 | 8.66E-05 | 1.93E-03 | 2238.29 | not significant |
| 11713 | MAPKAPK5-AS1 | 1.11 | 3.45E-03 | 3.09E-02 | 716.63  | not significant |
| 11714 | E2F8         | 1.11 | 3.14E-04 | 5.39E-03 | 1810.02 | not significant |
| 11715 | PKMYT1       | 1.11 | 7.68E-06 | 2.71E-04 | 3790.22 | not significant |
| 11716 | TMUB2        | 1.11 | 3.77E-03 | 3.29E-02 | 680.39  | not significant |
| 11717 | PPAPDC2      | 1.11 | 8.42E-03 | 5.93E-02 | 386.14  | not significant |
| 11718 | MAN2A2       | 1.11 | 5.50E-04 | 8.18E-03 | 2320.12 | not significant |
| 11719 | XRCC1        | 1.11 | 4.42E-04 | 6.94E-03 | 1316.42 | not significant |
| 11720 | SEC31B       | 1.11 | 1.08E-02 | 7.05E-02 | 9352.32 | not significant |
| 11721 | ZNF512B      | 1.11 | 2.00E-05 | 6.08E-04 | 2774.29 | not significant |
| 11722 | ACTR1B       | 1.11 | 3.04E-04 | 5.28E-03 | 2060.34 | not significant |
| 11723 | QPRT         | 1.11 | 2.19E-03 | 2.27E-02 | 894.07  | not significant |
| 11724 | GBA2         | 1.11 | 1.91E-03 | 2.05E-02 | 861.42  | not significant |
| 11725 | CCDC150      | 1.11 | 1.15E-02 | 7.31E-02 | 290.29  | not significant |
| 11726 | JUND         | 1.11 | 2.28E-05 | 6.73E-04 | 6443.63 | not significant |
| 11727 | DDRGK1       | 1.11 | 2.33E-04 | 4.28E-03 | 1784.85 | not significant |
| 11728 | ABCB10       | 1.11 | 8.58E-05 | 1.92E-03 | 2208.51 | not significant |
| 11729 | WBP2         | 1.11 | 2.29E-05 | 6.73E-04 | 3360.74 | not significant |
| 11730 | CEP152       | 1.11 | 3.95E-04 | 6.38E-03 | 1674.18 | not significant |
| 11731 | ZDHC13       | 1.11 | 2.70E-03 | 2.62E-02 | 974.87  | not significant |
| 11732 | LUC7L        | 1.11 | 1.15E-04 | 2.42E-03 | 2088.93 | not significant |
| 11733 | LSS          | 1.11 | 3.67E-05 | 9.54E-04 | 2115.56 | not significant |
| 11734 | CTSS         | 1.11 | 3.30E-03 | 3.01E-02 | 669.19  | not significant |
| 11735 | FOXO2-AS1    | 1.11 | 1.09E-02 | 7.07E-02 | 251.04  | not significant |
| 11736 | ITGA1        | 1.11 | 3.21E-04 | 5.44E-03 | 3730.71 | not significant |
| 11737 | SCAND1       | 1.12 | 1.68E-03 | 1.87E-02 | 1330.79 | not significant |
| 11738 | WDR27        | 1.12 | 8.04E-03 | 5.72E-02 | 368.50  | not significant |
| 11739 | ACSF3        | 1.12 | 2.53E-05 | 7.27E-04 | 2326.53 | not significant |
| 11740 | DYRK1B       | 1.12 | 1.21E-02 | 7.59E-02 | 172.10  | not significant |
| 11741 | ASIC1        | 1.12 | 1.41E-03 | 1.64E-02 | 1053.23 | not significant |
| 11742 | MIR17HG      | 1.12 | 8.35E-03 | 5.89E-02 | 371.24  | not significant |
| 11743 | CDK18        | 1.12 | 5.93E-03 | 4.60E-02 | 436.57  | not significant |
| 11744 | TMEM44       | 1.12 | 9.28E-03 | 6.30E-02 | 408.63  | not significant |
| 11745 | GALT         | 1.12 | 3.45E-03 | 3.09E-02 | 591.19  | not significant |
| 11746 | RAB11B       | 1.12 | 1.67E-05 | 5.25E-04 | 3090.37 | not significant |
| 11747 | CHMP6        | 1.12 | 1.18E-03 | 1.43E-02 | 998.16  | not significant |
| 11748 | FAM107B      | 1.12 | 6.66E-04 | 9.38E-03 | 1427.04 | not significant |
| 11749 | CNPY3        | 1.12 | 1.66E-05 | 5.24E-04 | 3474.04 | not significant |
| 11750 | CASP8        | 1.12 | 1.18E-04 | 2.46E-03 | 1748.11 | not significant |
| 11751 | CLIP4        | 1.12 | 7.09E-04 | 9.88E-03 | 994.00  | not significant |
| 11752 | DHRS7        | 1.12 | 4.70E-04 | 7.31E-03 | 1151.09 | not significant |
| 11753 | TUBA1A       | 1.12 | 5.85E-05 | 1.40E-03 | 3751.23 | not significant |
| 11754 | PELI2        | 1.12 | 1.29E-04 | 2.64E-03 | 1703.92 | not significant |
| 11755 | FKRP         | 1.12 | 9.37E-04 | 1.22E-02 | 923.56  | not significant |
| 11756 | FAAH         | 1.12 | 5.82E-03 | 4.54E-02 | 443.21  | not significant |
| 11757 | BTN3A1       | 1.12 | 3.29E-04 | 5.54E-03 | 1213.41 | not significant |
| 11758 | ZBED6        | 1.12 | 4.17E-03 | 3.56E-02 | 564.92  | not significant |
| 11759 | C21orf58     | 1.12 | 4.40E-03 | 3.70E-02 | 561.14  | not significant |
| 11760 | LIMD2        | 1.12 | 2.34E-05 | 6.84E-04 | 3558.28 | not significant |
| 11761 | TTC17        | 1.12 | 1.14E-04 | 2.41E-03 | 2194.63 | not significant |
| 11762 | RAD9A        | 1.12 | 1.36E-04 | 2.77E-03 | 1793.49 | not significant |
| 11763 | EIF4EBP1     | 1.12 | 1.49E-04 | 2.98E-03 | 3422.34 | not significant |
| 11764 | PCIF1        | 1.12 | 1.49E-05 | 4.80E-04 | 2426.10 | not significant |
| 11765 | IP6K2        | 1.12 | 2.16E-05 | 6.47E-04 | 2380.56 | not significant |
| 11766 | IDH2         | 1.12 | 1.99E-07 | 1.22E-05 | 8984.58 | not significant |
| 11767 | FUOJ         | 1.12 | 1.09E-02 | 7.07E-02 | 138.52  | not significant |
| 11768 | STAT2        | 1.12 | 6.95E-05 | 1.62E-03 | 1939.79 | not significant |
| 11769 | ACAT2        | 1.12 | 3.04E-05 | 8.20E-04 | 3898.65 | not significant |
| 11770 | LRMP         | 1.12 | 6.75E-04 | 9.49E-03 | 1025.02 | not significant |
| 11771 | CARF         | 1.12 | 7.83E-03 | 5.64E-02 | 312.86  | not significant |
| 11772 | TMEM59       | 1.12 | 1.07E-05 | 3.56E-04 | 2282.91 | not significant |
| 11773 | ICAM3        | 1.12 | 4.85E-06 | 1.88E-04 | 2965.28 | not significant |
| 11774 | FAIM3        | 1.12 | 7.87E-03 | 5.66E-02 | 312.99  | not significant |
| 11775 | CCNL2        | 1.12 | 1.98E-05 | 6.05E-04 | 2586.25 | not significant |
| 11776 | BTN3A3       | 1.12 | 1.45E-03 | 1.67E-02 | 754.78  | not significant |
| 11777 | INSR         | 1.12 | 2.73E-03 | 2.63E-02 | 616.05  | not significant |
| 11778 | LRRC8C       | 1.12 | 1.36E-04 | 2.77E-03 | 1655.55 | not significant |
| 11779 | MAGEH1       | 1.12 | 2.61E-03 | 2.57E-02 | 587.67  | not significant |

|       |            |      |          |          |          |                 |
|-------|------------|------|----------|----------|----------|-----------------|
| 11780 | DBN1       | 1.12 | 2.57E-05 | 7.31E-04 | 2747.89  | not significant |
| 11781 | AGFG2      | 1.12 | 8.86E-04 | 1.16E-02 | 868.46   | not significant |
| 11782 | SCAMP1-AS1 | 1.12 | 9.73E-03 | 6.53E-02 | 253.11   | not significant |
| 11783 | SUZ12P1    | 1.12 | 5.93E-03 | 4.60E-02 | 374.54   | not significant |
| 11784 | MYO1G      | 1.12 | 2.02E-07 | 1.23E-05 | 7231.11  | not significant |
| 11785 | YEATS4     | 1.12 | 2.92E-04 | 5.12E-03 | 1930.09  | not significant |
| 11786 | BEND5      | 1.13 | 9.68E-03 | 6.51E-02 | 235.53   | not significant |
| 11787 | APH1A      | 1.13 | 1.93E-03 | 2.07E-02 | 800.34   | not significant |
| 11788 | TONSL      | 1.13 | 1.07E-05 | 3.57E-04 | 3174.16  | not significant |
| 11789 | SMAD1      | 1.13 | 3.72E-03 | 3.27E-02 | 492.40   | not significant |
| 11790 | SLC18A2    | 1.13 | 1.05E-03 | 1.31E-02 | 891.82   | not significant |
| 11791 | AMZ2P1     | 1.13 | 5.75E-03 | 4.50E-02 | 371.27   | not significant |
| 11792 | SYTL1      | 1.13 | 2.47E-03 | 2.48E-02 | 533.30   | not significant |
| 11793 | TMEM107    | 1.13 | 9.79E-03 | 6.55E-02 | 140.23   | not significant |
| 11794 | CDK5RAP3   | 1.13 | 5.95E-06 | 2.21E-04 | 5116.87  | not significant |
| 11795 | MBNL2      | 1.13 | 5.98E-04 | 8.69E-03 | 939.18   | not significant |
| 11796 | C19orf60   | 1.13 | 1.87E-03 | 2.02E-02 | 712.17   | not significant |
| 11797 | SLAMF6     | 1.13 | 1.04E-04 | 2.25E-03 | 1292.39  | not significant |
| 11798 | LOC645513  | 1.13 | 8.45E-03 | 5.94E-02 | 234.51   | not significant |
| 11799 | SOX4       | 1.13 | 3.64E-11 | 5.87E-09 | 16972.81 | not significant |
| 11800 | RNF122     | 1.13 | 5.91E-03 | 4.60E-02 | 331.49   | not significant |
| 11801 | ZNF33B     | 1.13 | 6.27E-04 | 8.99E-03 | 890.08   | not significant |
| 11802 | SREBF2     | 1.13 | 1.24E-08 | 1.18E-06 | 9651.34  | not significant |
| 11803 | IL10RB     | 1.13 | 4.48E-05 | 1.13E-03 | 1566.92  | not significant |
| 11804 | ZGRF1      | 1.13 | 2.98E-04 | 5.20E-03 | 1771.00  | not significant |
| 11805 | HECA       | 1.13 | 2.49E-05 | 7.19E-04 | 2016.42  | not significant |
| 11806 | WDR90      | 1.13 | 1.95E-04 | 3.68E-03 | 1730.06  | not significant |
| 11807 | CCDC28A    | 1.13 | 3.17E-03 | 2.94E-02 | 484.25   | not significant |
| 11808 | RPP25L     | 1.13 | 4.53E-03 | 3.77E-02 | 409.98   | not significant |
| 11809 | TIMELESS   | 1.13 | 1.28E-10 | 1.97E-08 | 8684.31  | not significant |
| 11810 | GRIPAP1    | 1.13 | 4.94E-04 | 7.58E-03 | 929.05   | not significant |
| 11811 | N4BP2L1    | 1.13 | 3.56E-03 | 3.18E-02 | 454.50   | not significant |
| 11812 | ZNF711     | 1.13 | 7.61E-05 | 1.73E-03 | 1775.74  | not significant |
| 11813 | C15orf61   | 1.13 | 7.54E-03 | 5.50E-02 | 275.34   | not significant |
| 11814 | CD37       | 1.13 | 9.47E-05 | 2.07E-03 | 1260.61  | not significant |
| 11815 | BTN3A2     | 1.13 | 7.14E-05 | 1.66E-03 | 1377.05  | not significant |
| 11816 | HDAC9      | 1.13 | 4.74E-04 | 7.37E-03 | 871.86   | not significant |
| 11817 | SGSM3      | 1.13 | 7.90E-05 | 1.78E-03 | 1504.79  | not significant |
| 11818 | HHIP-AS1   | 1.13 | 7.94E-05 | 1.78E-03 | 1334.36  | not significant |
| 11819 | NSUN5P1    | 1.13 | 9.68E-03 | 6.51E-02 | 132.67   | not significant |
| 11820 | CCDC61     | 1.13 | 6.35E-03 | 4.83E-02 | 305.56   | not significant |
| 11821 | KCNN4      | 1.13 | 6.32E-03 | 4.82E-02 | 308.39   | not significant |
| 11822 | SERINC5    | 1.13 | 4.53E-07 | 2.52E-05 | 7924.65  | not significant |
| 11823 | NR2C1      | 1.13 | 8.58E-05 | 1.92E-03 | 1381.38  | not significant |
| 11824 | AGO4       | 1.14 | 8.04E-04 | 1.09E-02 | 989.28   | not significant |
| 11825 | RBM38      | 1.14 | 1.87E-03 | 2.01E-02 | 528.74   | not significant |
| 11826 | KIAA0101   | 1.14 | 5.93E-07 | 3.16E-05 | 3493.25  | not significant |
| 11827 | BIRC3      | 1.14 | 1.23E-03 | 1.48E-02 | 631.69   | not significant |
| 11828 | LOC730101  | 1.14 | 1.71E-03 | 1.88E-02 | 655.07   | not significant |
| 11829 | MYO18B     | 1.14 | 4.07E-07 | 2.31E-05 | 11527.66 | not significant |
| 11830 | PAQR4      | 1.14 | 4.67E-05 | 1.17E-03 | 1855.98  | not significant |
| 11831 | TMEM175    | 1.14 | 2.46E-03 | 2.47E-02 | 444.21   | not significant |
| 11832 | MPG        | 1.14 | 7.84E-04 | 1.07E-02 | 833.24   | not significant |
| 11833 | TP53113    | 1.14 | 7.41E-05 | 1.70E-03 | 1255.77  | not significant |
| 11834 | ADCK3      | 1.14 | 5.37E-04 | 8.09E-03 | 732.56   | not significant |
| 11835 | OSBPL3     | 1.14 | 2.92E-06 | 1.22E-04 | 2826.21  | not significant |
| 11836 | GATA3      | 1.14 | 3.41E-09 | 3.87E-07 | 6028.00  | not significant |
| 11837 | ICAM2      | 1.14 | 6.14E-09 | 6.20E-07 | 5350.61  | not significant |
| 11838 | MVD        | 1.14 | 1.74E-04 | 3.35E-03 | 1454.85  | not significant |
| 11839 | TAF8       | 1.14 | 2.25E-04 | 4.15E-03 | 1031.48  | not significant |
| 11840 | TMBIM4     | 1.14 | 5.00E-05 | 1.24E-03 | 1422.37  | not significant |
| 11841 | SLC35E2B   | 1.14 | 2.00E-05 | 6.08E-04 | 2401.57  | not significant |
| 11842 | ITGA4      | 1.14 | 1.04E-08 | 1.01E-06 | 20253.32 | not significant |
| 11843 | PPDPF      | 1.14 | 5.44E-04 | 8.11E-03 | 983.47   | not significant |
| 11844 | AMDHD2     | 1.14 | 2.86E-03 | 2.72E-02 | 480.19   | not significant |
| 11845 | MZF1       | 1.14 | 6.61E-03 | 4.99E-02 | 268.74   | not significant |
| 11846 | TMEM129    | 1.14 | 1.02E-03 | 1.30E-02 | 588.10   | not significant |
| 11847 | SUMF2      | 1.14 | 2.38E-08 | 2.19E-06 | 3988.11  | not significant |
| 11848 | RAB24      | 1.14 | 4.84E-04 | 7.47E-03 | 792.79   | not significant |
| 11849 | ASPSCR1    | 1.14 | 3.46E-04 | 5.75E-03 | 921.39   | not significant |
| 11850 | EDEM1      | 1.14 | 6.08E-08 | 4.61E-06 | 7945.34  | not significant |
| 11851 | DGKQ       | 1.14 | 3.80E-05 | 9.86E-04 | 1357.41  | not significant |
| 11852 | TSTD1      | 1.14 | 6.32E-03 | 4.82E-02 | 244.88   | not significant |
| 11853 | ERP29      | 1.14 | 4.53E-09 | 4.87E-07 | 7259.63  | not significant |
| 11854 | TMEM159    | 1.14 | 3.10E-03 | 2.89E-02 | 375.68   | not significant |
| 11855 | ZNF496     | 1.14 | 1.11E-04 | 2.35E-03 | 1024.94  | not significant |
| 11856 | NFKBID     | 1.14 | 6.66E-03 | 5.02E-02 | 242.47   | not significant |
| 11857 | SVOPL      | 1.14 | 4.21E-03 | 3.59E-02 | 352.74   | not significant |
| 11858 | DDAH2      | 1.14 | 2.94E-03 | 2.78E-02 | 385.06   | not significant |
| 11859 | CD28       | 1.14 | 1.82E-10 | 2.60E-08 | 9132.31  | not significant |
| 11860 | CAMLG      | 1.14 | 8.36E-05 | 1.88E-03 | 1215.17  | not significant |
| 11861 | FAM84B     | 1.14 | 8.55E-03 | 5.96E-02 | 181.31   | not significant |
| 11862 | STT3B      | 1.14 | 2.08E-10 | 2.94E-08 | 25627.61 | not significant |
| 11863 | ERAP1      | 1.14 | 1.29E-06 | 6.17E-05 | 3304.73  | not significant |
| 11864 | NOA1       | 1.14 | 2.02E-05 | 6.10E-04 | 1445.03  | not significant |
| 11865 | MAN2C1     | 1.14 | 4.99E-05 | 1.24E-03 | 1149.23  | not significant |
| 11866 | ANKRD23    | 1.14 | 9.00E-03 | 6.18E-02 | 130.79   | not significant |
| 11867 | RCCD1      | 1.14 | 4.80E-04 | 7.42E-03 | 707.33   | not significant |

|       |               |      |          |          |          |                 |
|-------|---------------|------|----------|----------|----------|-----------------|
| 11868 | PPP1R3E       | 1.14 | 3.47E-03 | 3.11E-02 | 356.54   | not significant |
| 11869 | CD1B          | 1.15 | 4.46E-08 | 3.57E-06 | 3370.75  | not significant |
| 11870 | NPC2          | 1.15 | 3.36E-04 | 5.64E-03 | 750.17   | not significant |
| 11871 | PIGM          | 1.15 | 3.45E-04 | 5.75E-03 | 897.62   | not significant |
| 11872 | GPCPD1        | 1.15 | 1.52E-04 | 3.03E-03 | 874.72   | not significant |
| 11873 | IRS2          | 1.15 | 8.31E-04 | 1.11E-02 | 607.02   | not significant |
| 11874 | OGFOD3        | 1.15 | 3.44E-05 | 9.04E-04 | 1215.24  | not significant |
| 11875 | TBC1D17       | 1.15 | 1.18E-03 | 1.44E-02 | 505.71   | not significant |
| 11876 | TTC31         | 1.15 | 6.11E-05 | 1.46E-03 | 1022.90  | not significant |
| 11877 | LOC646719     | 1.15 | 8.13E-04 | 1.10E-02 | 566.23   | not significant |
| 11878 | LINC01003     | 1.15 | 7.05E-03 | 5.24E-02 | 191.10   | not significant |
| 11879 | HNRNPU-AS1    | 1.15 | 3.16E-04 | 5.40E-03 | 931.37   | not significant |
| 11880 | CEP57         | 1.15 | 5.83E-09 | 6.10E-07 | 3297.41  | not significant |
| 11881 | LINC00938     | 1.15 | 1.47E-04 | 2.95E-03 | 836.38   | not significant |
| 11882 | CEBPB         | 1.15 | 1.39E-03 | 1.63E-02 | 708.00   | not significant |
| 11883 | LOC285074     | 1.15 | 2.39E-03 | 2.43E-02 | 371.90   | not significant |
| 11884 | FLJ10038      | 1.15 | 5.77E-03 | 4.51E-02 | 234.39   | not significant |
| 11885 | SPPL2B        | 1.15 | 1.11E-05 | 3.64E-04 | 1437.80  | not significant |
| 11886 | SERPINB1      | 1.15 | 6.19E-07 | 3.26E-05 | 2445.61  | not significant |
| 11887 | UBALD2        | 1.15 | 2.91E-07 | 1.73E-05 | 3326.58  | not significant |
| 11888 | USP3          | 1.15 | 5.12E-05 | 1.26E-03 | 1004.66  | not significant |
| 11889 | HSF4          | 1.15 | 5.86E-03 | 4.57E-02 | 216.70   | not significant |
| 11890 | PDE4DIP       | 1.15 | 3.70E-03 | 3.26E-02 | 307.11   | not significant |
| 11891 | FDFT1         | 1.15 | 1.57E-11 | 3.14E-09 | 15948.48 | not significant |
| 11892 | ERBB2         | 1.15 | 7.42E-03 | 5.44E-02 | 162.20   | not significant |
| 11893 | MEX3B         | 1.15 | 6.17E-03 | 4.73E-02 | 206.96   | not significant |
| 11894 | AK3           | 1.15 | 9.41E-06 | 3.19E-04 | 1340.69  | not significant |
| 11895 | DKFZP58611420 | 1.15 | 2.72E-03 | 2.63E-02 | 364.92   | not significant |
| 11896 | MANBA         | 1.15 | 5.39E-04 | 8.09E-03 | 588.22   | not significant |
| 11897 | LRIG1         | 1.16 | 5.67E-04 | 8.37E-03 | 675.99   | not significant |
| 11898 | LOC100287015  | 1.16 | 7.84E-03 | 5.65E-02 | 141.43   | not significant |
| 11899 | EVI2B         | 1.16 | 4.00E-04 | 6.41E-03 | 715.82   | not significant |
| 11900 | PCMTD1        | 1.16 | 1.52E-04 | 3.03E-03 | 841.48   | not significant |
| 11901 | PITPNM1       | 1.16 | 2.55E-08 | 2.26E-06 | 2981.65  | not significant |
| 11902 | TMEM57        | 1.16 | 1.88E-06 | 8.34E-05 | 1815.52  | not significant |
| 11903 | NIPSNAP3A     | 1.16 | 3.14E-04 | 5.39E-03 | 638.06   | not significant |
| 11904 | DNAJC1        | 1.16 | 6.90E-05 | 1.61E-03 | 909.74   | not significant |
| 11905 | SLFN13        | 1.16 | 4.45E-05 | 1.13E-03 | 1169.66  | not significant |
| 11906 | ZNF446        | 1.16 | 2.90E-03 | 2.75E-02 | 299.48   | not significant |
| 11907 | TTC14         | 1.16 | 4.38E-07 | 2.46E-05 | 2463.54  | not significant |
| 11908 | SESTD1        | 1.16 | 1.13E-03 | 1.39E-02 | 507.34   | not significant |
| 11909 | SCGB3A1       | 1.16 | 3.32E-03 | 3.02E-02 | 382.35   | not significant |
| 11910 | FAM214A       | 1.16 | 1.76E-03 | 1.92E-02 | 409.92   | not significant |
| 11911 | LMF2          | 1.16 | 2.42E-07 | 1.46E-05 | 2697.84  | not significant |
| 11912 | C11orf68      | 1.16 | 6.28E-04 | 8.99E-03 | 508.62   | not significant |
| 11913 | PDCD4         | 1.16 | 2.63E-05 | 7.46E-04 | 1078.61  | not significant |
| 11914 | CCNE1         | 1.16 | 5.47E-04 | 8.15E-03 | 540.94   | not significant |
| 11915 | ENTPD4        | 1.16 | 1.18E-06 | 5.65E-05 | 2348.85  | not significant |
| 11916 | FADS1         | 1.16 | 1.13E-10 | 1.77E-08 | 7931.75  | not significant |
| 11917 | UBA7          | 1.16 | 4.59E-07 | 2.52E-05 | 2142.51  | not significant |
| 11918 | SAP25         | 1.16 | 2.46E-03 | 2.47E-02 | 340.44   | not significant |
| 11919 | STAT5B        | 1.16 | 1.09E-13 | 3.21E-11 | 7310.16  | not significant |
| 11920 | SLC44A2       | 1.16 | 6.40E-08 | 4.78E-06 | 2238.00  | not significant |
| 11921 | ZDHHC12       | 1.16 | 9.12E-05 | 2.02E-03 | 1024.55  | not significant |
| 11922 | PSAT1         | 1.16 | 4.15E-12 | 9.88E-10 | 7268.14  | not significant |
| 11923 | NINL          | 1.16 | 2.66E-07 | 1.60E-05 | 1770.72  | not significant |
| 11924 | SFI1          | 1.16 | 2.07E-06 | 9.02E-05 | 1753.21  | not significant |
| 11925 | VPS11         | 1.16 | 2.46E-03 | 2.47E-02 | 356.53   | not significant |
| 11926 | TMEM97        | 1.16 | 4.89E-03 | 3.99E-02 | 214.22   | not significant |
| 11927 | AP1G2         | 1.16 | 2.95E-07 | 1.75E-05 | 2352.09  | not significant |
| 11928 | PDXDC2P       | 1.16 | 2.68E-03 | 2.61E-02 | 295.44   | not significant |
| 11929 | DHCR7         | 1.16 | 3.83E-08 | 3.19E-06 | 2702.29  | not significant |
| 11930 | KIAA0895L     | 1.16 | 6.77E-06 | 2.45E-04 | 1350.43  | not significant |
| 11931 | SLC29A3       | 1.16 | 3.71E-03 | 3.26E-02 | 253.80   | not significant |
| 11932 | CEP131        | 1.16 | 3.23E-06 | 1.32E-04 | 1353.05  | not significant |
| 11933 | CHMP1B        | 1.16 | 1.45E-06 | 6.71E-05 | 1435.00  | not significant |
| 11934 | TTYH2         | 1.16 | 5.27E-03 | 4.21E-02 | 211.46   | not significant |
| 11935 | FAM173A       | 1.16 | 7.45E-03 | 5.45E-02 | 133.54   | not significant |
| 11936 | ASB16-AS1     | 1.16 | 3.08E-03 | 2.87E-02 | 294.40   | not significant |
| 11937 | CD27-AS1      | 1.16 | 4.09E-01 | NA       | 76.89    | not significant |
| 11938 | PHF1          | 1.16 | 2.63E-03 | 2.58E-02 | 282.76   | not significant |
| 11939 | LRP10         | 1.16 | 8.13E-06 | 2.82E-04 | 1131.98  | not significant |
| 11940 | DCHS1         | 1.17 | 3.22E-03 | 2.96E-02 | 1593.80  | not significant |
| 11941 | IER2          | 1.17 | 1.71E-07 | 1.08E-05 | 2829.51  | not significant |
| 11942 | CD83          | 1.17 | 4.86E-06 | 1.88E-04 | 1452.61  | not significant |
| 11943 | THTPA         | 1.17 | 1.97E-03 | 2.09E-02 | 322.68   | not significant |
| 11944 | LENG8         | 1.17 | 1.26E-04 | 2.59E-03 | 904.37   | not significant |
| 11945 | APOBR         | 1.17 | 2.37E-05 | 6.91E-04 | 927.41   | not significant |
| 11946 | ABCD4         | 1.17 | 6.51E-06 | 2.37E-04 | 1163.98  | not significant |
| 11947 | SPAG7         | 1.17 | 5.39E-05 | 1.32E-03 | 1091.52  | not significant |
| 11948 | NSDHL         | 1.17 | 2.71E-03 | 2.63E-02 | 305.92   | not significant |
| 11949 | ZBED6CL       | 1.17 | 1.52E-04 | 3.03E-03 | 641.16   | not significant |
| 11950 | TMTC4         | 1.17 | 1.39E-04 | 2.82E-03 | 702.31   | not significant |
| 11951 | PNKP          | 1.17 | 2.42E-05 | 7.05E-04 | 855.63   | not significant |
| 11952 | MGST2         | 1.17 | 3.92E-03 | 3.39E-02 | 236.95   | not significant |
| 11953 | INSIG1        | 1.17 | 2.30E-16 | 9.59E-14 | 16850.18 | not significant |
| 11954 | CD69          | 1.17 | 1.64E-06 | 7.38E-05 | 1477.30  | not significant |
| 11955 | CCDC88B       | 1.17 | 1.92E-06 | 8.46E-05 | 1307.30  | not significant |

|       |              |      |          |          |          |                 |
|-------|--------------|------|----------|----------|----------|-----------------|
| 11956 | MDFIC        | 1.17 | 3.47E-13 | 9.38E-11 | 5400.51  | not significant |
| 11957 | PYCARD       | 1.17 | 4.89E-03 | 3.99E-02 | 176.42   | not significant |
| 11958 | MIEF2        | 1.17 | 3.66E-03 | 3.24E-02 | 240.97   | not significant |
| 11959 | PTPRC        | 1.17 | 5.74E-10 | 7.55E-08 | 7870.40  | not significant |
| 11960 | PCAT18       | 1.17 | 1.75E-03 | 1.92E-02 | 338.92   | not significant |
| 11961 | IFIT2        | 1.17 | 2.61E-03 | 2.57E-02 | 258.00   | not significant |
| 11962 | CRTPAP       | 1.17 | 1.77E-11 | 3.35E-09 | 3714.18  | not significant |
| 11963 | LINC00847    | 1.18 | 2.83E-04 | 4.98E-03 | 513.91   | not significant |
| 11964 | MMP24-AS1    | 1.18 | 3.91E-04 | 6.34E-03 | 485.38   | not significant |
| 11965 | SLC35E2      | 1.18 | 8.12E-04 | 1.10E-02 | 386.52   | not significant |
| 11966 | CD58         | 1.18 | 2.45E-08 | 2.21E-06 | 2037.91  | not significant |
| 11967 | CLEC2D       | 1.18 | 3.61E-05 | 9.46E-04 | 777.83   | not significant |
| 11968 | SLC25A45     | 1.18 | 1.32E-03 | 1.56E-02 | 325.06   | not significant |
| 11969 | CHST14       | 1.18 | 3.13E-05 | 8.38E-04 | 847.32   | not significant |
| 11970 | CD48         | 1.18 | 1.13E-08 | 1.08E-06 | 2586.68  | not significant |
| 11971 | HSD17B11     | 1.18 | 2.09E-05 | 6.27E-04 | 824.36   | not significant |
| 11972 | CYP51A1      | 1.18 | 2.22E-06 | 9.55E-05 | 1138.77  | not significant |
| 11973 | IFI44        | 1.18 | 1.85E-05 | 5.73E-04 | 818.49   | not significant |
| 11974 | RM12         | 1.18 | 5.53E-05 | 1.35E-03 | 725.37   | not significant |
| 11975 | AZIN2        | 1.18 | 2.85E-03 | 2.71E-02 | 223.89   | not significant |
| 11976 | PIGQ         | 1.18 | 6.10E-06 | 2.25E-04 | 945.94   | not significant |
| 11977 | ZBED5        | 1.18 | 6.09E-07 | 3.22E-05 | 1530.78  | not significant |
| 11978 | GLTSCR2      | 1.18 | 3.27E-11 | 5.54E-09 | 7349.15  | not significant |
| 11979 | CCR9         | 1.18 | 5.10E-12 | 1.13E-09 | 3892.44  | not significant |
| 11980 | CDKN1B       | 1.18 | 9.26E-07 | 4.52E-05 | 1298.95  | not significant |
| 11981 | PPAPDC1B     | 1.18 | 1.77E-05 | 5.52E-04 | 917.54   | not significant |
| 11982 | E2F1         | 1.18 | 3.15E-13 | 8.76E-11 | 4148.90  | not significant |
| 11983 | CHTF18       | 1.18 | 4.03E-08 | 3.31E-06 | 2615.43  | not significant |
| 11984 | CLCN7        | 1.18 | 1.25E-07 | 8.54E-06 | 1842.32  | not significant |
| 11985 | SLC46A3      | 1.18 | 7.03E-05 | 1.64E-03 | 676.17   | not significant |
| 11986 | SPSB3        | 1.18 | 1.27E-04 | 2.62E-03 | 727.04   | not significant |
| 11987 | AGTRAP       | 1.19 | 1.53E-03 | 1.74E-02 | 272.01   | not significant |
| 11988 | ARAP1        | 1.19 | 2.39E-11 | 4.43E-09 | 3812.90  | not significant |
| 11989 | C5orf45      | 1.19 | 3.79E-03 | 3.30E-02 | 194.28   | not significant |
| 11990 | HLA-E        | 1.19 | 3.97E-07 | 2.27E-05 | 1354.33  | not significant |
| 11991 | OGDHL        | 1.19 | 1.13E-03 | 1.39E-02 | 303.87   | not significant |
| 11992 | C16orf54     | 1.19 | 9.75E-08 | 6.87E-06 | 1604.61  | not significant |
| 11993 | SNHG7        | 1.19 | 1.37E-07 | 8.99E-06 | 1600.59  | not significant |
| 11994 | ZMYM6NB      | 1.19 | 4.35E-04 | 6.86E-03 | 467.16   | not significant |
| 11995 | ACSF2        | 1.19 | 7.49E-04 | 1.03E-02 | 323.66   | not significant |
| 11996 | CYTH2        | 1.19 | 5.58E-10 | 7.45E-08 | 2202.92  | not significant |
| 11997 | ABCA7        | 1.19 | 1.50E-06 | 6.90E-05 | 1021.52  | not significant |
| 11998 | RPARP-AS1    | 1.19 | 5.39E-04 | 8.09E-03 | 362.33   | not significant |
| 11999 | SLC6A9       | 1.19 | 2.43E-04 | 4.44E-03 | 454.15   | not significant |
| 12000 | FAM219B      | 1.19 | 1.41E-05 | 4.59E-04 | 876.12   | not significant |
| 12001 | GSDMD        | 1.19 | 1.82E-10 | 2.60E-08 | 2454.22  | not significant |
| 12002 | FAM193B      | 1.19 | 2.93E-08 | 2.50E-06 | 2392.22  | not significant |
| 12003 | GIMAP2       | 1.19 | 8.81E-10 | 1.09E-07 | 2315.68  | not significant |
| 12004 | CD40LG       | 1.20 | 9.74E-09 | 9.58E-07 | 1612.54  | Increased       |
| 12005 | JDP2         | 1.20 | 5.63E-04 | 8.34E-03 | 344.75   | Increased       |
| 12006 | RHEBL1       | 1.20 | 5.61E-03 | 4.41E-02 | 120.03   | Increased       |
| 12007 | NEAT1        | 1.20 | 7.98E-04 | 1.09E-02 | 2396.75  | Increased       |
| 12008 | GPT2         | 1.20 | 3.05E-08 | 2.59E-06 | 1438.15  | Increased       |
| 12009 | PABPC1L      | 1.20 | 1.46E-05 | 4.74E-04 | 922.42   | Increased       |
| 12010 | MRC2         | 1.20 | 4.34E-09 | 4.73E-07 | 1624.21  | Increased       |
| 12011 | LOC100131564 | 1.20 | 4.50E-03 | 3.75E-02 | 155.29   | Increased       |
| 12012 | IVNS1ABP     | 1.20 | 3.15E-19 | 2.25E-16 | 5738.87  | Increased       |
| 12013 | RFNG         | 1.21 | 9.03E-07 | 4.45E-05 | 898.55   | Increased       |
| 12014 | SQLE         | 1.21 | 1.69E-16 | 7.71E-14 | 5734.30  | Increased       |
| 12015 | LOC100130872 | 1.21 | 2.54E-05 | 7.27E-04 | 561.07   | Increased       |
| 12016 | SFT2D3       | 1.21 | 6.09E-05 | 1.45E-03 | 489.92   | Increased       |
| 12017 | LOC729683    | 1.21 | 6.91E-03 | NA       | 66.50    | Increased       |
| 12018 | SPRY1        | 1.21 | 1.94E-04 | 3.68E-03 | 394.30   | Increased       |
| 12019 | AHSA2        | 1.21 | 5.97E-09 | 6.10E-07 | 1880.22  | Increased       |
| 12020 | PPP1R15A     | 1.22 | 5.06E-06 | 1.95E-04 | 673.28   | Increased       |
| 12021 | GOLGA8B      | 1.22 | 1.49E-05 | 4.80E-04 | 727.83   | Increased       |
| 12022 | DUSP1        | 1.22 | 2.24E-04 | 4.14E-03 | 361.91   | Increased       |
| 12023 | TCIRG1       | 1.22 | 3.53E-11 | 5.80E-09 | 3168.31  | Increased       |
| 12024 | SLC38A2      | 1.22 | 1.51E-15 | 5.61E-13 | 16561.73 | Increased       |
| 12025 | CALCOCO1     | 1.22 | 7.75E-05 | 1.76E-03 | 410.22   | Increased       |
| 12026 | CDT1         | 1.22 | 1.07E-15 | 4.28E-13 | 6187.96  | Increased       |
| 12027 | BCHE         | 1.22 | 6.42E-07 | 3.33E-05 | 834.97   | Increased       |
| 12028 | TPM2         | 1.23 | 3.76E-03 | 3.28E-02 | 136.42   | Increased       |
| 12029 | RHPN1        | 1.23 | 1.24E-11 | 2.53E-09 | 2879.29  | Increased       |
| 12030 | RASGEF1B     | 1.23 | 1.02E-03 | 1.30E-02 | 218.19   | Increased       |
| 12031 | LETMD1       | 1.23 | 4.16E-11 | 6.60E-09 | 1702.47  | Increased       |
| 12032 | PLA2G6       | 1.23 | 2.09E-07 | 1.27E-05 | 812.19   | Increased       |
| 12033 | STAT5A       | 1.23 | 2.38E-30 | 5.95E-27 | 17679.76 | Increased       |
| 12034 | GPC2         | 1.23 | 4.78E-05 | 1.20E-03 | 463.42   | Increased       |
| 12035 | ZNF277       | 1.23 | 2.29E-06 | 9.74E-05 | 647.32   | Increased       |
| 12036 | HERC2P2      | 1.23 | 2.47E-05 | 7.15E-04 | 585.13   | Increased       |
| 12037 | C1orf228     | 1.23 | 4.95E-15 | 1.71E-12 | 2800.04  | Increased       |
| 12038 | NFKB2        | 1.23 | 4.20E-07 | 2.37E-05 | 815.89   | Increased       |
| 12039 | ATHL1        | 1.24 | 1.38E-15 | 5.31E-13 | 6336.37  | Increased       |
| 12040 | ROBO3        | 1.24 | 1.69E-06 | 7.58E-05 | 632.12   | Increased       |
| 12041 | ADM2         | 1.24 | 1.53E-05 | 4.89E-04 | 559.61   | Increased       |
| 12042 | PCED1A       | 1.24 | 3.62E-07 | 2.08E-05 | 795.84   | Increased       |
| 12043 | MSMO1        | 1.24 | 4.35E-15 | 1.56E-12 | 2653.06  | Increased       |

|       |              |      |          |          |         |           |
|-------|--------------|------|----------|----------|---------|-----------|
| 12044 | DNASE1       | 1.24 | 1.18E-04 | 2.46E-03 | 352.11  | Increased |
| 12045 | PRDM8        | 1.24 | 9.56E-04 | 1.24E-02 | 198.34  | Increased |
| 12046 | SLC43A1      | 1.24 | 9.24E-04 | 1.20E-02 | 206.19  | Increased |
| 12047 | ITGA6        | 1.24 | 1.17E-04 | 2.45E-03 | 367.82  | Increased |
| 12048 | SLC7A11      | 1.24 | 3.36E-09 | 3.86E-07 | 1308.91 | Increased |
| 12049 | TTC39B       | 1.25 | 2.74E-05 | 7.61E-04 | 412.57  | Increased |
| 12050 | SPC24        | 1.25 | 5.48E-06 | 2.08E-04 | 492.08  | Increased |
| 12051 | MAGEF1       | 1.25 | 2.72E-05 | 7.60E-04 | 396.41  | Increased |
| 12052 | C12orf76     | 1.25 | 5.17E-04 | 7.86E-03 | 207.11  | Increased |
| 12053 | KIFC2        | 1.26 | 8.40E-08 | 6.09E-06 | 767.19  | Increased |
| 12054 | CREBZF       | 1.26 | 1.44E-17 | 8.02E-15 | 3371.94 | Increased |
| 12055 | NATD1        | 1.26 | 1.18E-03 | 1.43E-02 | 157.57  | Increased |
| 12056 | METRN        | 1.26 | 3.15E-03 | 2.92E-02 | 108.01  | Increased |
| 12057 | HDAC7        | 1.26 | 2.09E-26 | 3.49E-23 | 5641.88 | Increased |
| 12058 | TIFA         | 1.26 | 5.95E-09 | 6.10E-07 | 861.30  | Increased |
| 12059 | TNFAIP3      | 1.26 | 8.23E-14 | 2.49E-11 | 2149.82 | Increased |
| 12060 | ANCO9        | 1.26 | 5.32E-03 | NA       | 67.95   | Increased |
| 12061 | HMGCS1       | 1.26 | 1.89E-31 | 6.30E-28 | 7829.15 | Increased |
| 12062 | INAFM1       | 1.26 | 3.10E-04 | 5.33E-03 | 238.88  | Increased |
| 12063 | KLF2         | 1.26 | 4.82E-05 | 1.20E-03 | 332.30  | Increased |
| 12064 | PAQR8        | 1.27 | 1.11E-06 | 5.35E-05 | 518.51  | Increased |
| 12065 | TM7SF2       | 1.27 | 1.79E-04 | 3.42E-03 | 258.06  | Increased |
| 12066 | MFGE8        | 1.27 | 1.26E-09 | 1.53E-07 | 889.48  | Increased |
| 12067 | PCK2         | 1.27 | 1.81E-09 | 2.15E-07 | 957.99  | Increased |
| 12068 | FCGBP        | 1.27 | 2.57E-04 | 4.63E-03 | 213.65  | Increased |
| 12069 | UCP2         | 1.27 | 9.58E-17 | 4.56E-14 | 2162.98 | Increased |
| 12070 | C1orf85      | 1.27 | 7.82E-06 | 2.74E-04 | 439.86  | Increased |
| 12071 | C6orf223     | 1.27 | 3.14E-11 | 5.50E-09 | 1158.41 | Increased |
| 12072 | EPB41L4A     | 1.28 | 1.25E-03 | 1.49E-02 | 141.12  | Increased |
| 12073 | RAB37        | 1.28 | 4.09E-14 | 1.32E-11 | 1744.98 | Increased |
| 12074 | ARHGAP33     | 1.28 | 3.31E-12 | 8.10E-10 | 1162.57 | Increased |
| 12075 | ASNS         | 1.28 | 1.72E-11 | 3.34E-09 | 1070.89 | Increased |
| 12076 | SLC20A1      | 1.29 | 1.64E-21 | 1.64E-18 | 4143.13 | Increased |
| 12077 | ISG20        | 1.29 | 1.07E-03 | 1.34E-02 | 136.30  | Increased |
| 12078 | HDAC5        | 1.29 | 1.61E-07 | 1.03E-05 | 593.58  | Increased |
| 12079 | HBP1         | 1.29 | 5.92E-06 | 2.21E-04 | 371.45  | Increased |
| 12080 | ARRDC3       | 1.29 | 9.76E-09 | 9.58E-07 | 686.59  | Increased |
| 12081 | GLYCK        | 1.29 | 1.10E-04 | 2.33E-03 | 244.42  | Increased |
| 12082 | CDH24        | 1.29 | 2.24E-04 | 4.14E-03 | 220.02  | Increased |
| 12083 | SESN2        | 1.30 | 2.99E-11 | 5.35E-09 | 947.13  | Increased |
| 12084 | CREB3L4      | 1.30 | 3.85E-04 | 6.30E-03 | 169.12  | Increased |
| 12085 | VLDLR        | 1.30 | 1.67E-07 | 1.06E-05 | 485.66  | Increased |
| 12086 | YPEL5        | 1.30 | 1.51E-06 | 6.90E-05 | 394.34  | Increased |
| 12087 | LOC100288152 | 1.30 | 5.12E-03 | NA       | 55.79   | Increased |
| 12088 | LY9          | 1.30 | 1.24E-04 | 2.57E-03 | 220.08  | Increased |
| 12089 | CTSG         | 1.31 | 9.30E-05 | 2.05E-03 | 210.10  | Increased |
| 12090 | SPNS3        | 1.31 | 1.51E-10 | 2.29E-08 | 873.74  | Increased |
| 12091 | ZEB1-AS1     | 1.31 | 1.31E-05 | 4.29E-04 | 280.94  | Increased |
| 12092 | OSBPPL7      | 1.31 | 4.78E-07 | 2.62E-05 | 460.81  | Increased |
| 12093 | CLIC5        | 1.32 | 1.41E-03 | NA       | 98.41   | Increased |
| 12094 | PTP4A3       | 1.32 | 8.65E-18 | 5.09E-15 | 1533.19 | Increased |
| 12095 | MAPK11       | 1.32 | 6.45E-04 | 9.14E-03 | 144.53  | Increased |
| 12096 | CHAC1        | 1.33 | 1.44E-06 | 6.69E-05 | 375.18  | Increased |
| 12097 | PBXIP1       | 1.33 | 2.19E-16 | 9.54E-14 | 1330.03 | Increased |
| 12098 | IDUA         | 1.34 | 6.40E-07 | 3.33E-05 | 398.98  | Increased |
| 12099 | EGR1         | 1.34 | 1.13E-29 | 2.27E-26 | 2988.34 | Increased |
| 12100 | ING4         | 1.35 | 5.41E-08 | 4.26E-06 | 471.70  | Increased |
| 12101 | MICAL1       | 1.35 | 9.35E-19 | 6.24E-16 | 2132.51 | Increased |
| 12102 | LPAR6        | 1.37 | 4.16E-22 | 4.63E-19 | 1814.68 | Increased |
| 12103 | SCRN2        | 1.37 | 1.25E-07 | 8.54E-06 | 377.11  | Increased |
| 12104 | PNRC1        | 1.37 | 9.18E-06 | 3.13E-04 | 235.71  | Increased |
| 12105 | ATG16L2      | 1.38 | 1.27E-13 | 3.63E-11 | 1083.85 | Increased |
| 12106 | ARSA         | 1.39 | 2.65E-08 | 2.32E-06 | 346.62  | Increased |
| 12107 | TM6SF1       | 1.40 | 2.52E-04 | 4.56E-03 | 108.60  | Increased |
| 12108 | ANXA2R       | 1.43 | 1.74E-12 | 4.57E-10 | 539.87  | Increased |
| 12109 | KLHL24       | 1.44 | 6.71E-08 | 4.94E-06 | 300.22  | Increased |
| 12110 | TPGS1        | 1.45 | 1.58E-06 | 7.20E-05 | 209.38  | Increased |
| 12111 | ABTB1        | 1.46 | 6.63E-07 | 3.40E-05 | 195.65  | Increased |
| 12112 | EVI2A        | 1.46 | 2.44E-08 | 2.21E-06 | 265.44  | Increased |
| 12113 | GPR18        | 1.48 | 1.29E-04 | NA       | 91.22   | Increased |
| 12114 | LRRRC70      | 1.49 | 3.67E-03 | NA       | 32.03   | Increased |
| 12115 | SCART1       | 1.53 | 1.93E-19 | 1.49E-16 | 878.92  | Increased |
| 12116 | SLC7A3       | 1.54 | 2.75E-03 | NA       | 34.53   | Increased |
| 12117 | YPEL1        | 1.59 | 1.77E-14 | 5.89E-12 | 374.44  | Increased |
| 12118 | CCNG2        | 1.66 | 1.30E-23 | 1.63E-20 | 590.43  | Increased |
| 12119 | ASS1         | 1.72 | 6.62E-07 | 3.40E-05 | 102.08  | Increased |
| 12120 | FOS          | 1.93 | 1.64E-05 | NA       | 47.86   | Increased |
| 12121 | NR4A1        | 2.16 | 4.89E-12 | 1.11E-09 | 104.29  | Increased |
| 12122 | BCL3         | 2.82 | 3.48E-03 | NA       | 7.29    | Increased |
